# Supplementary material for: Comprehensive, integrated, and phased whole-genome analysis of the primary ENCODE cell line K562
Source: HighWire-hosted journal article supplement (doi:10.1101/gr.234948.118), 2019-02-08

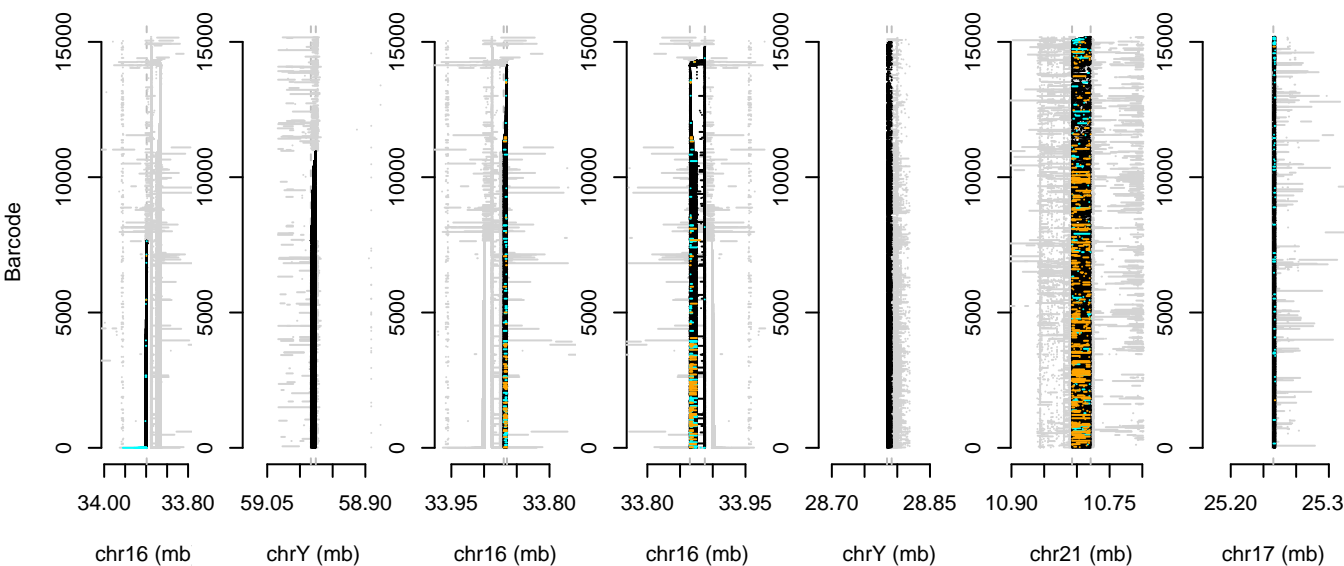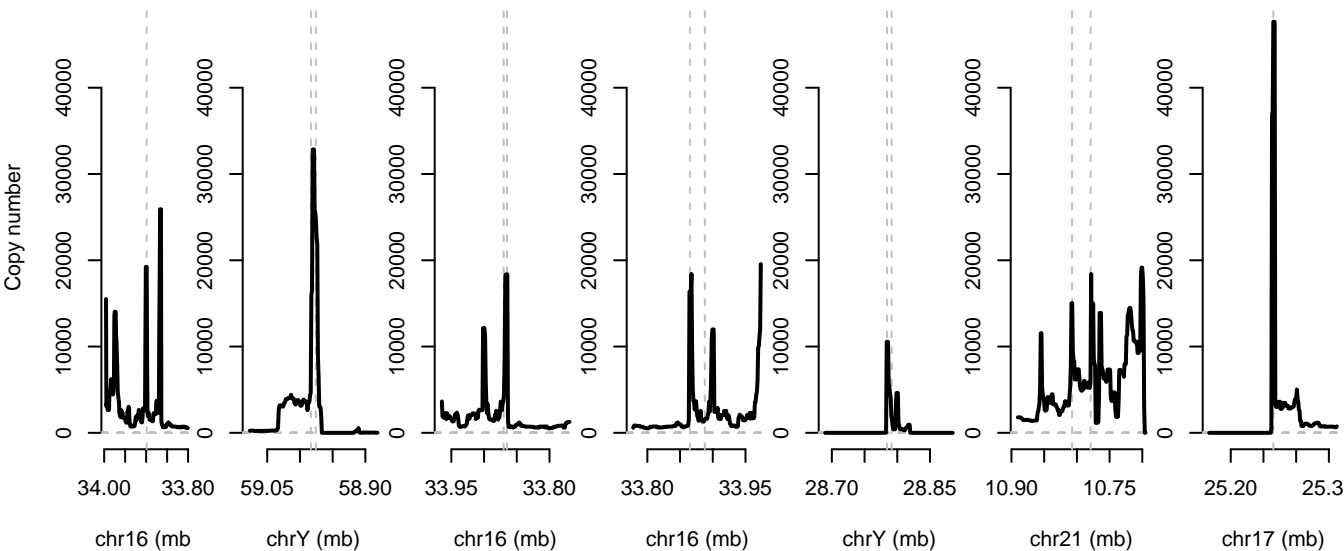

**K562 chr16:33,876,119::chr7:57,556,823++**

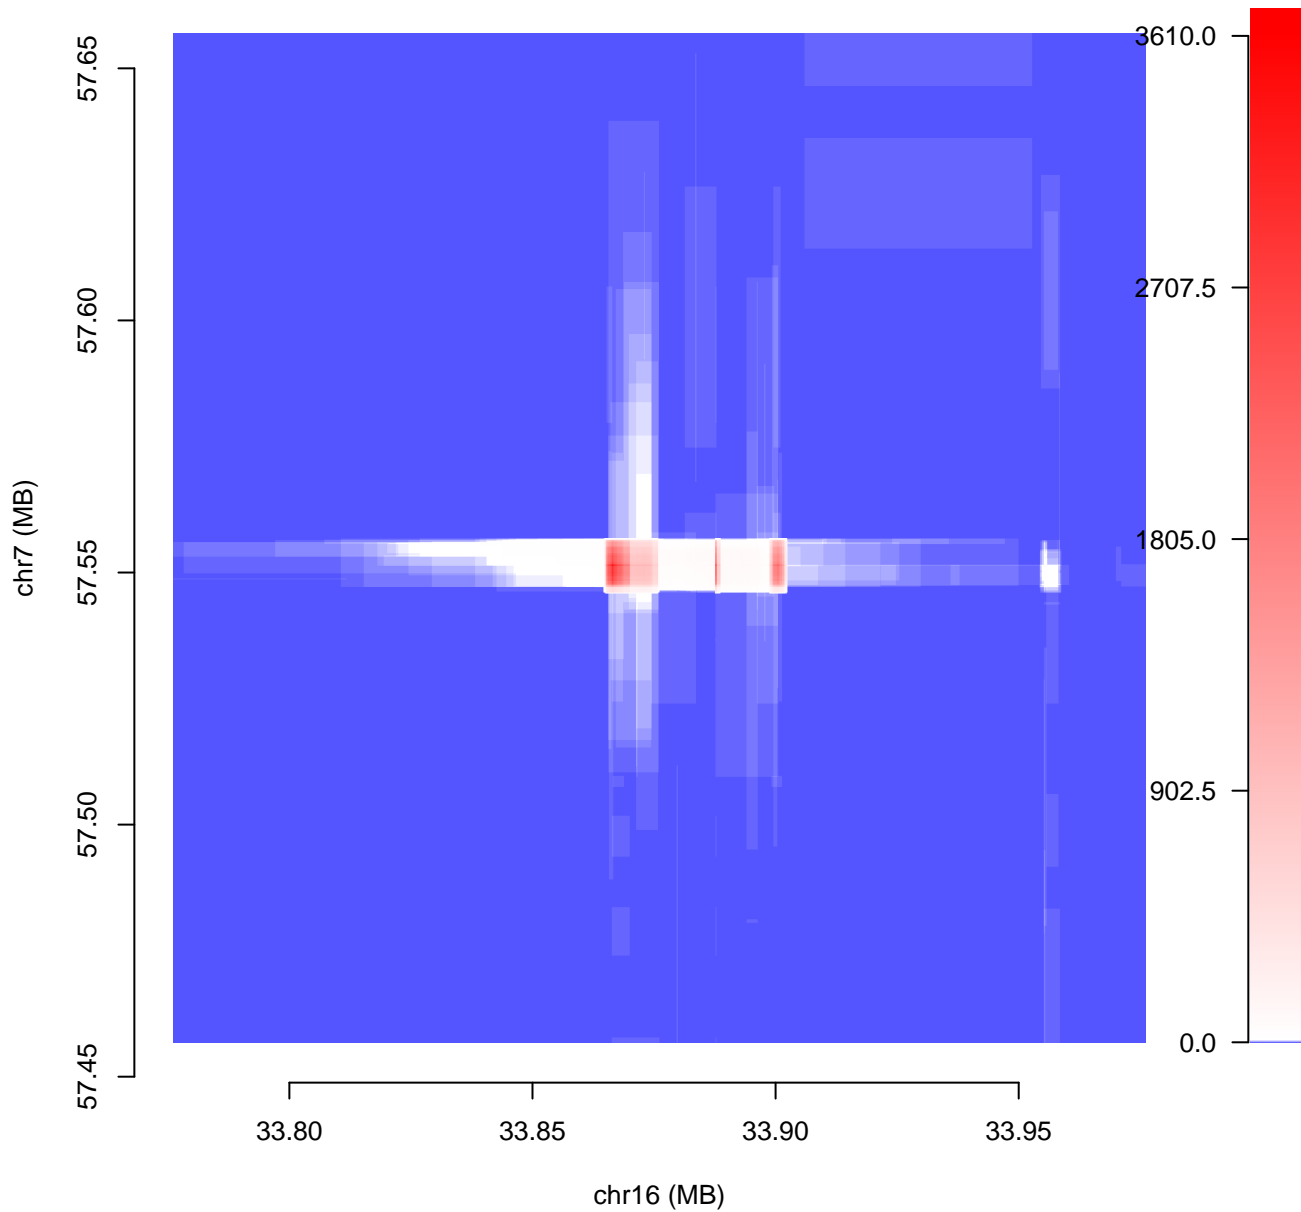

K562 chr16:33,876,119::chr16:33,864,975+-

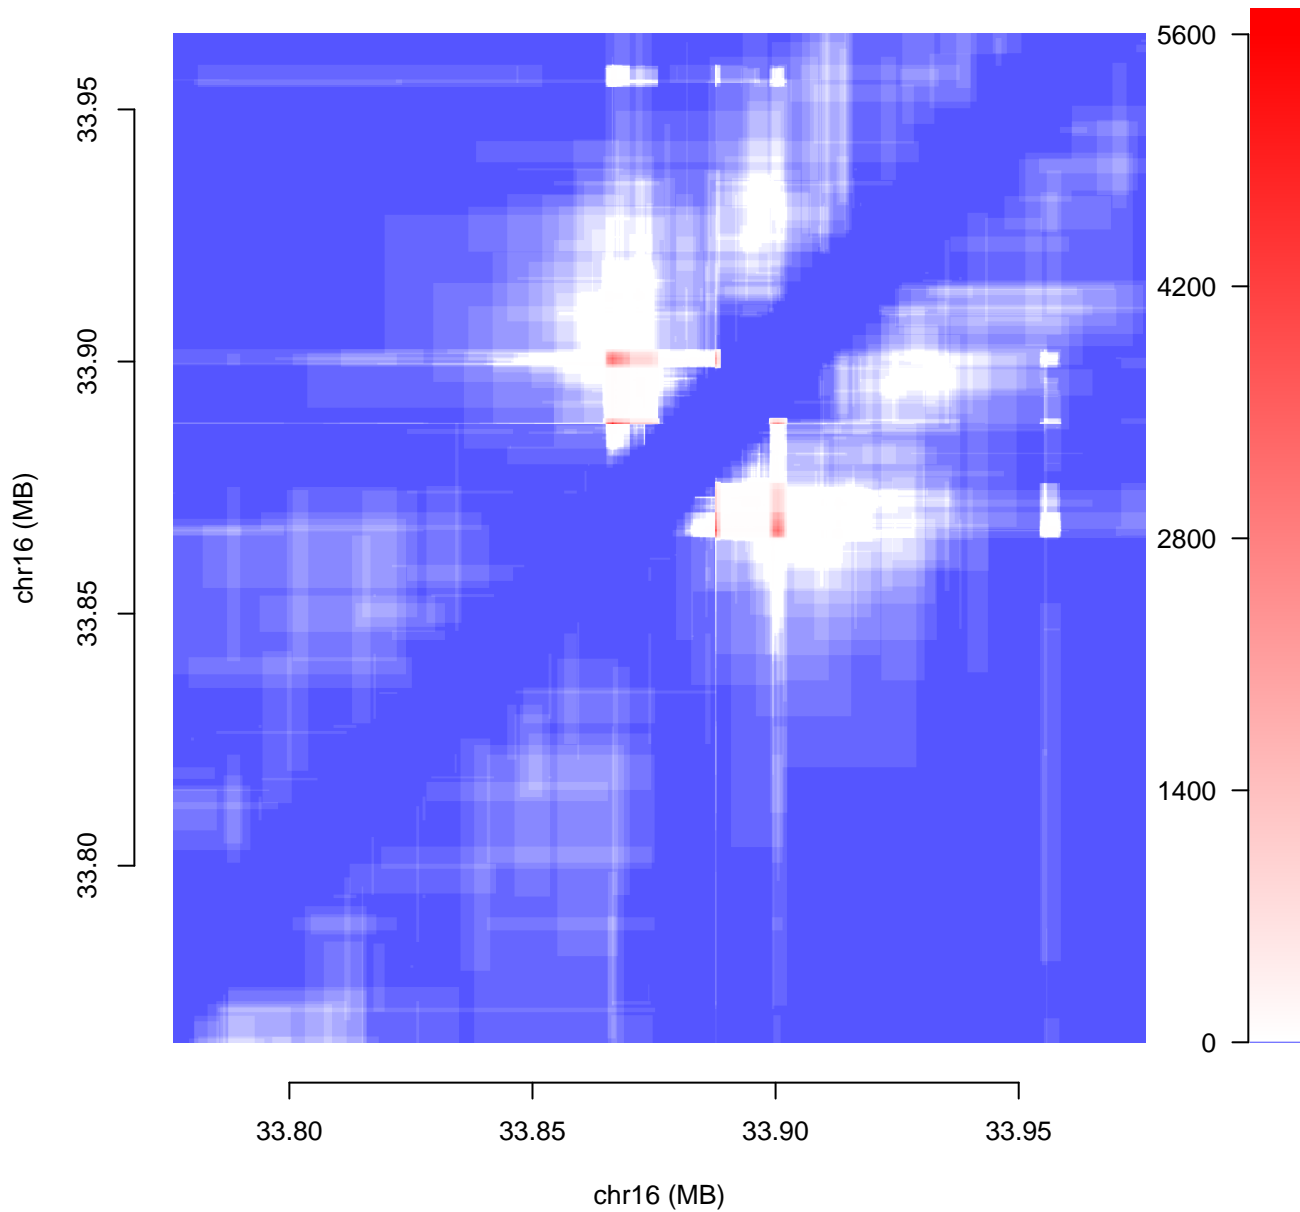

K562 chr7:57,556,823::chr7:57,545,828+-

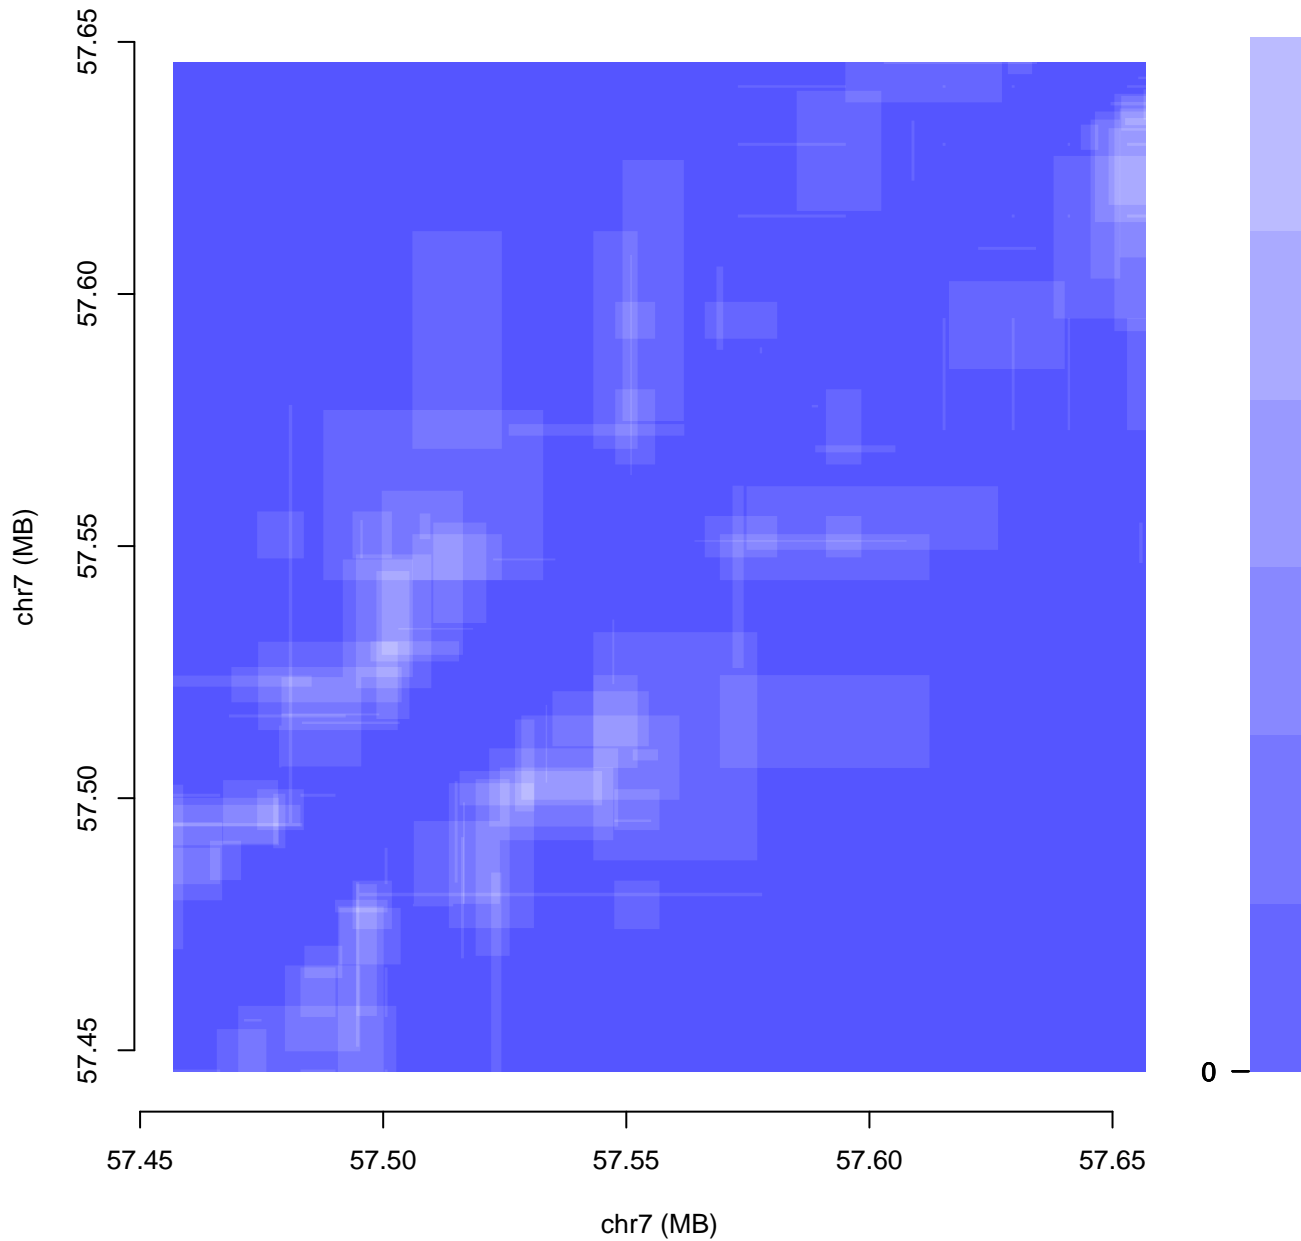

K562 chr21:10,807,407::chrY:28,791,445++

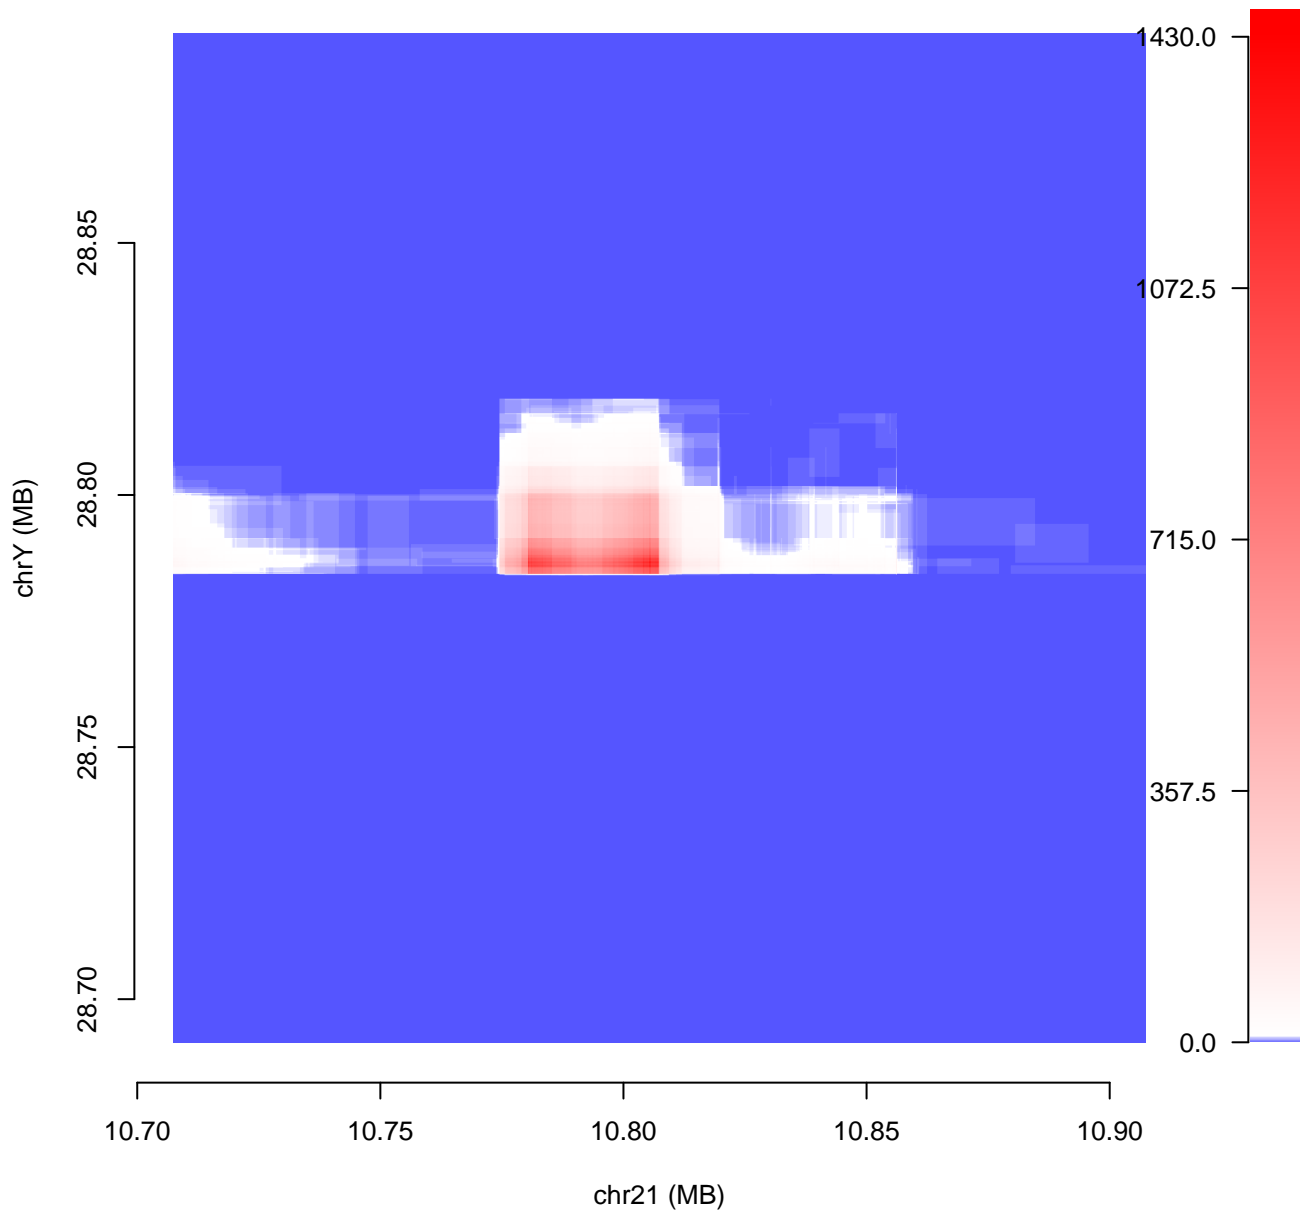

K562 chr21:10,807,407::chr21:10,779,012+-

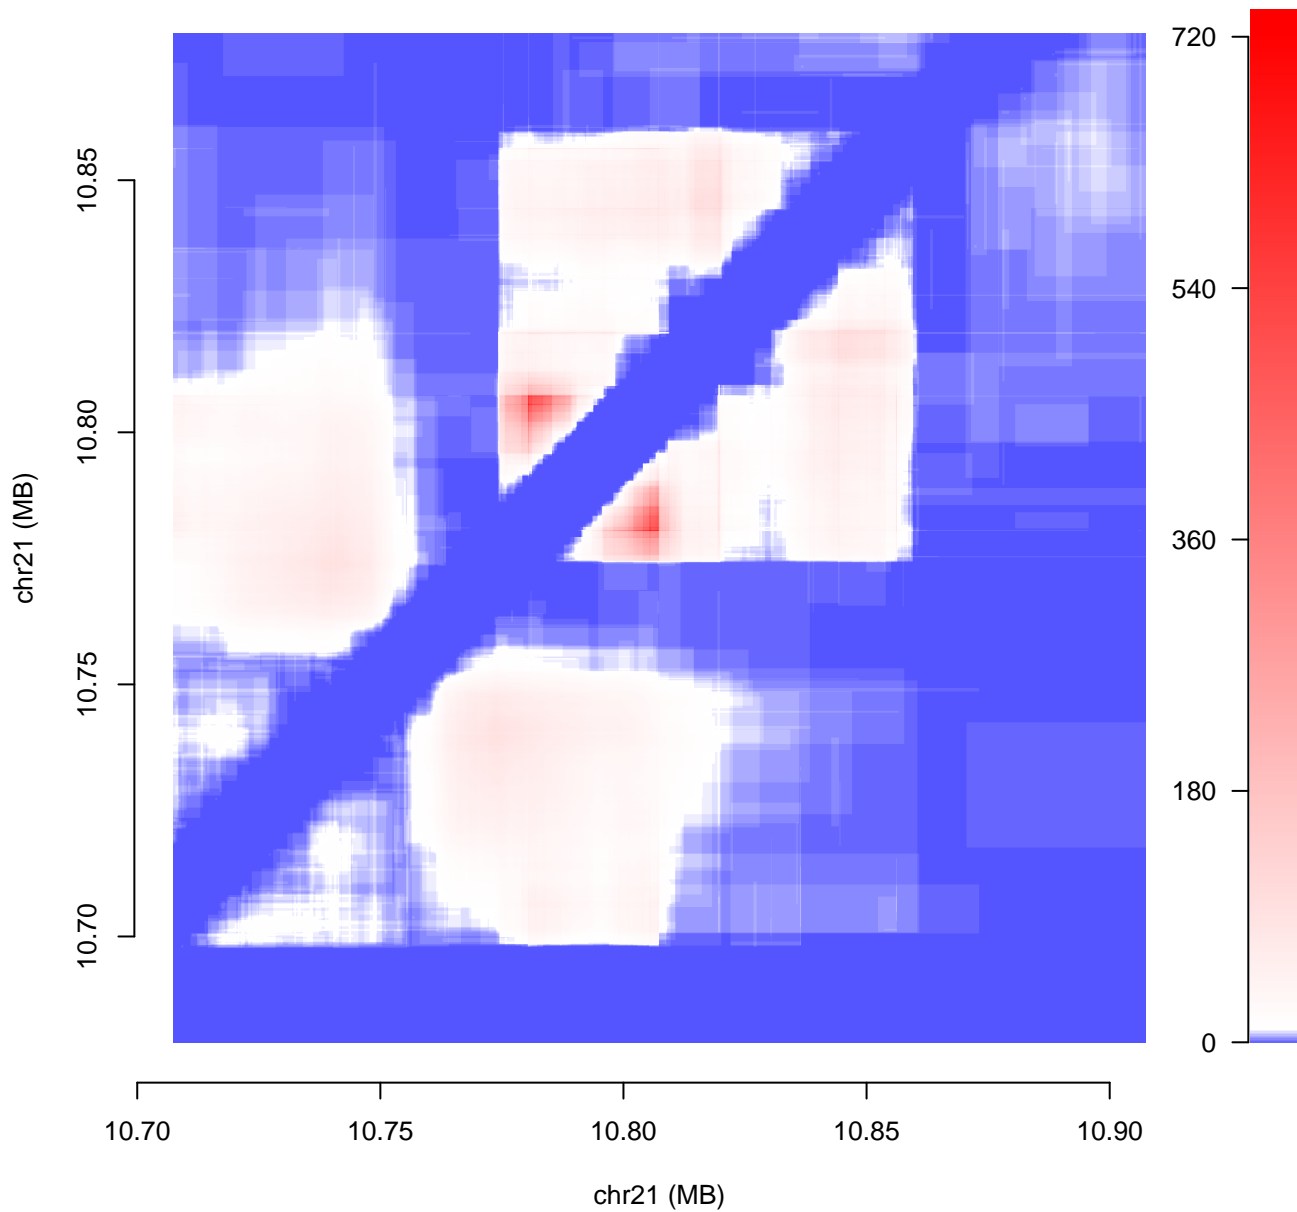

K562 chr16:33,887,610::chr16:33,901,801-+

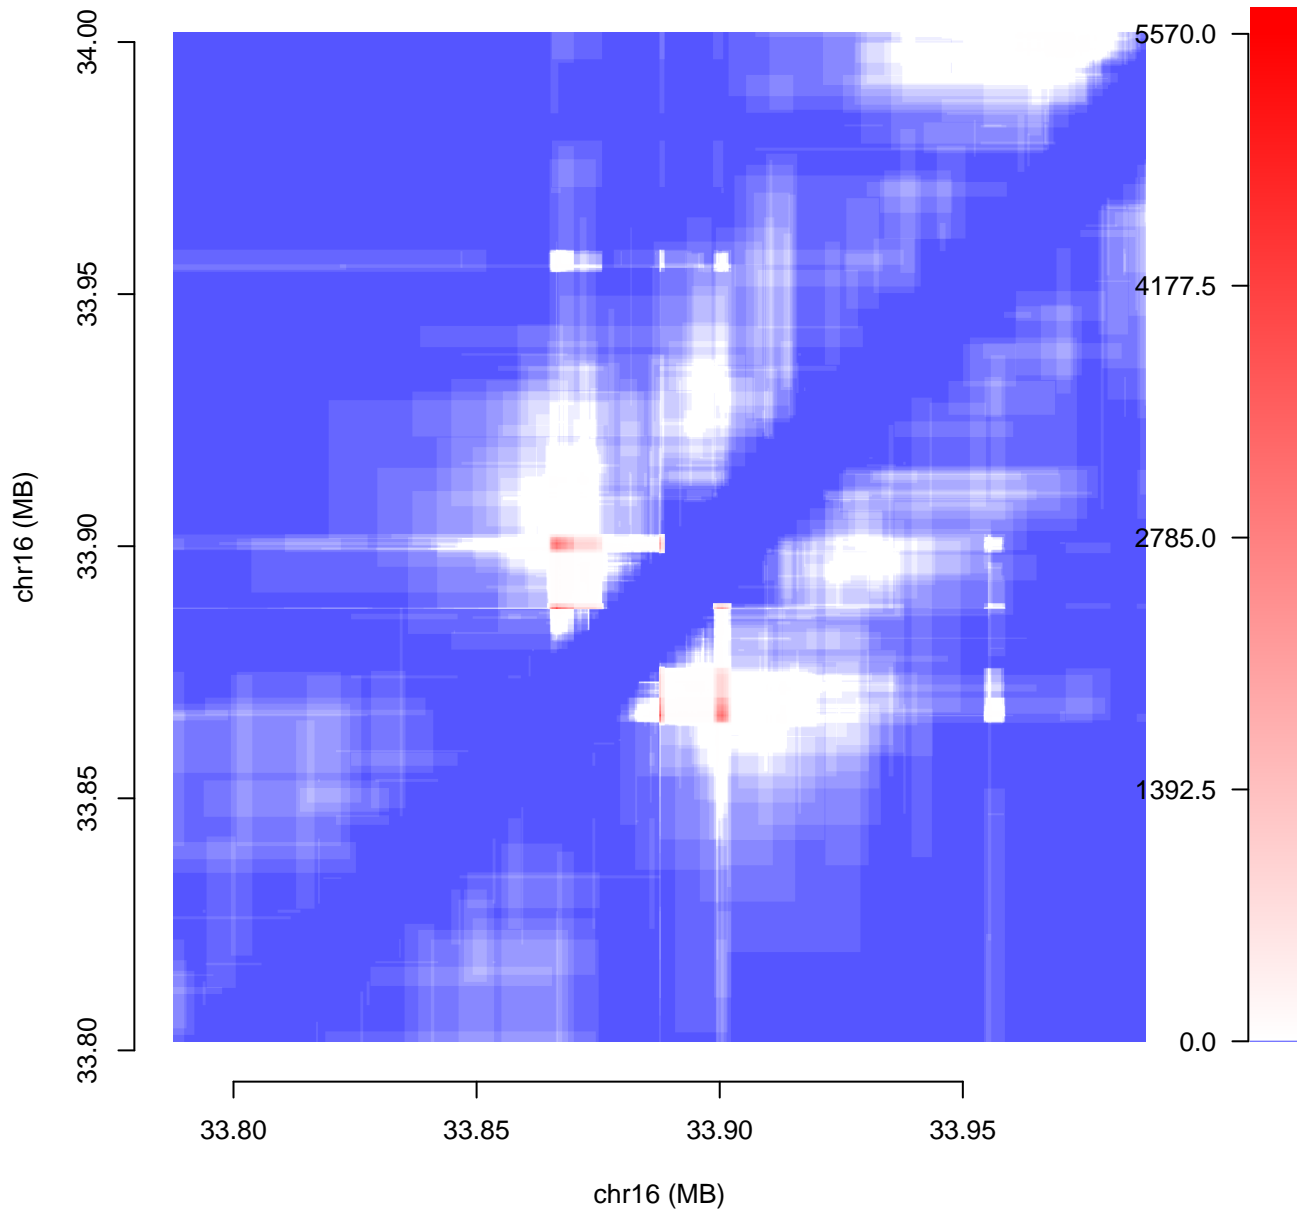

K562 chr16:33,887,610::chrY:13,446,507--

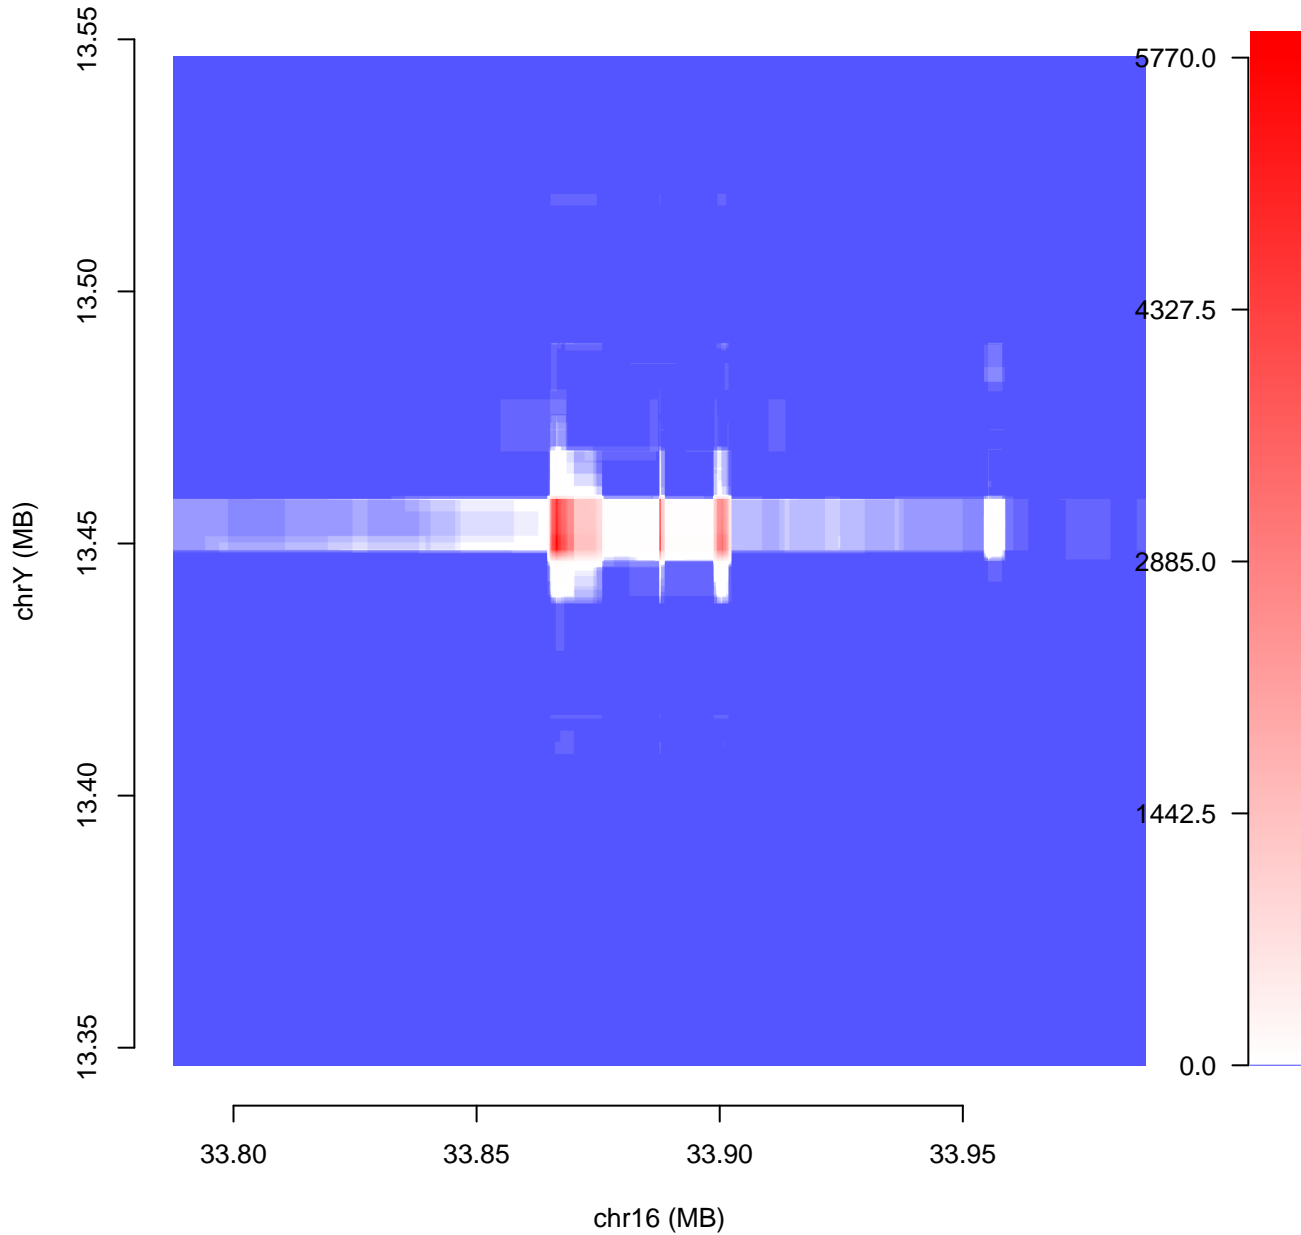



K562 chr7:57,545,828::chr21:10,087,831-+

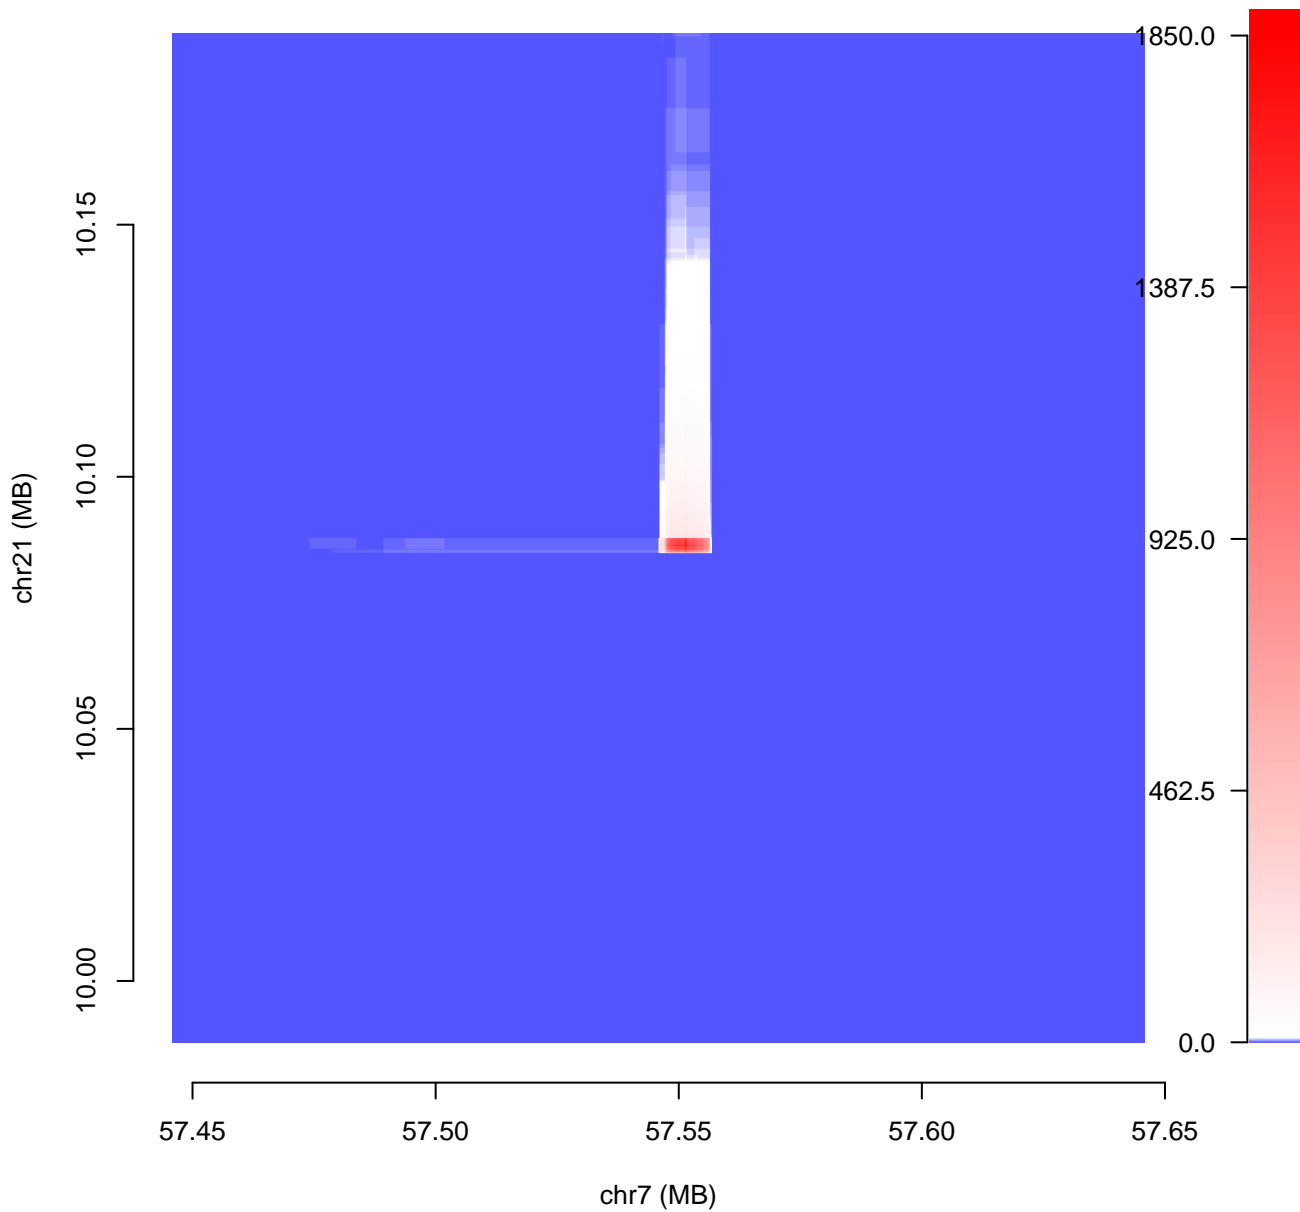

K562 chrY:13,143,892::chrY:13,459,379++

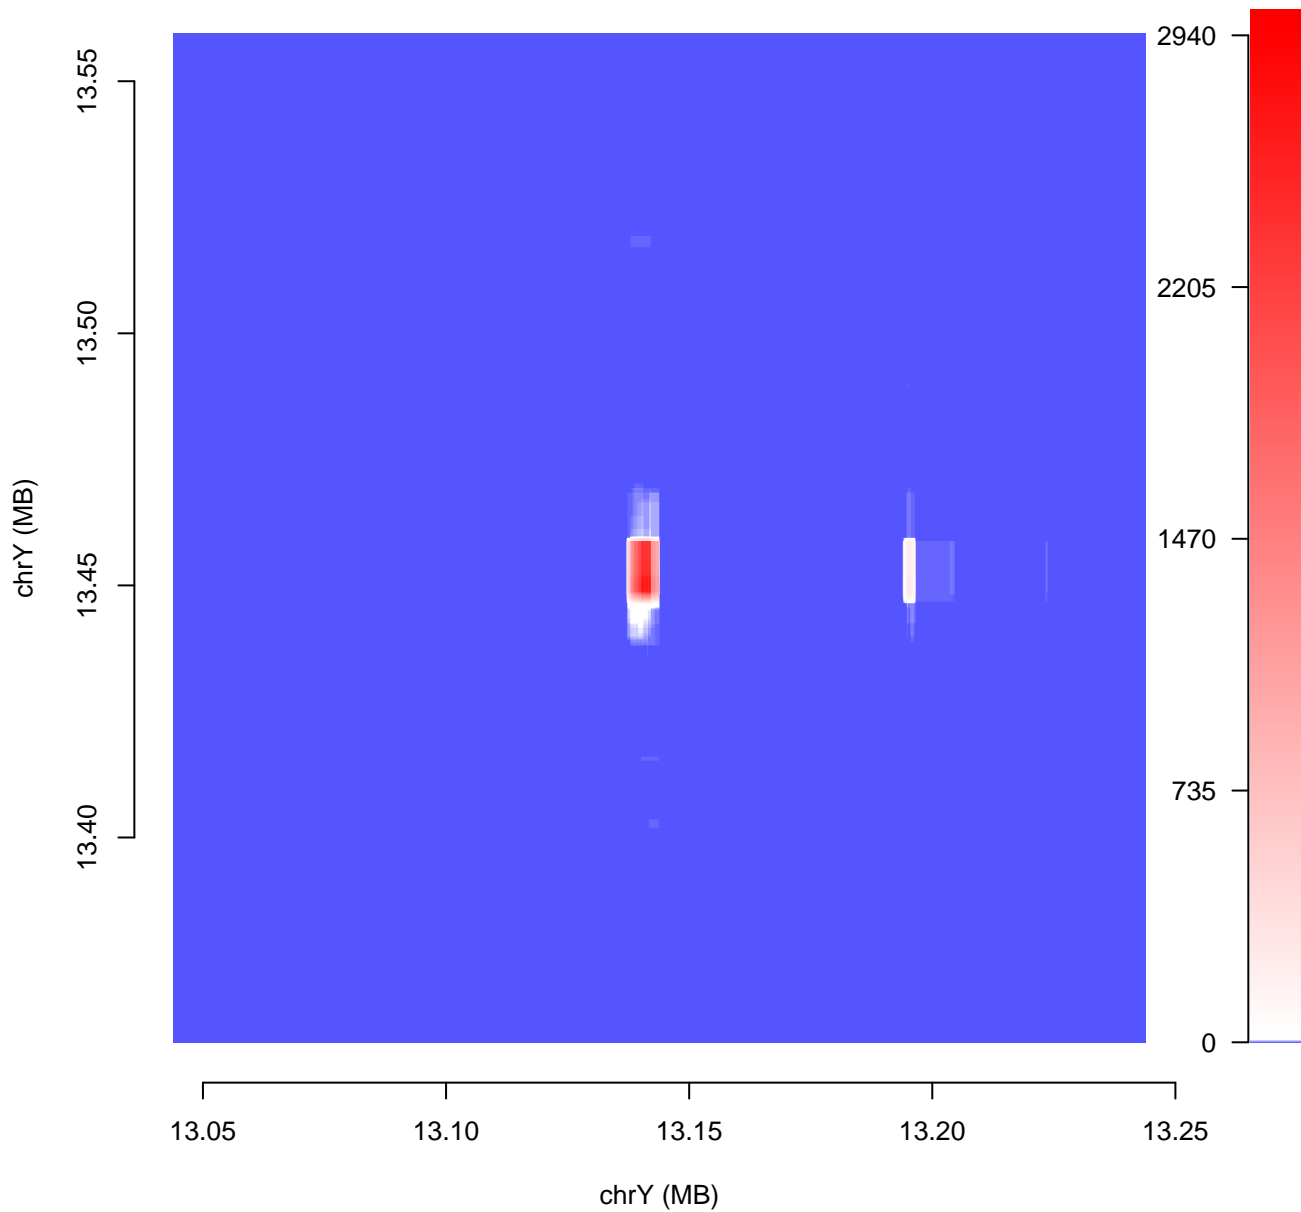

K562 chrY:13,143,892::chrY:13,137,237+-

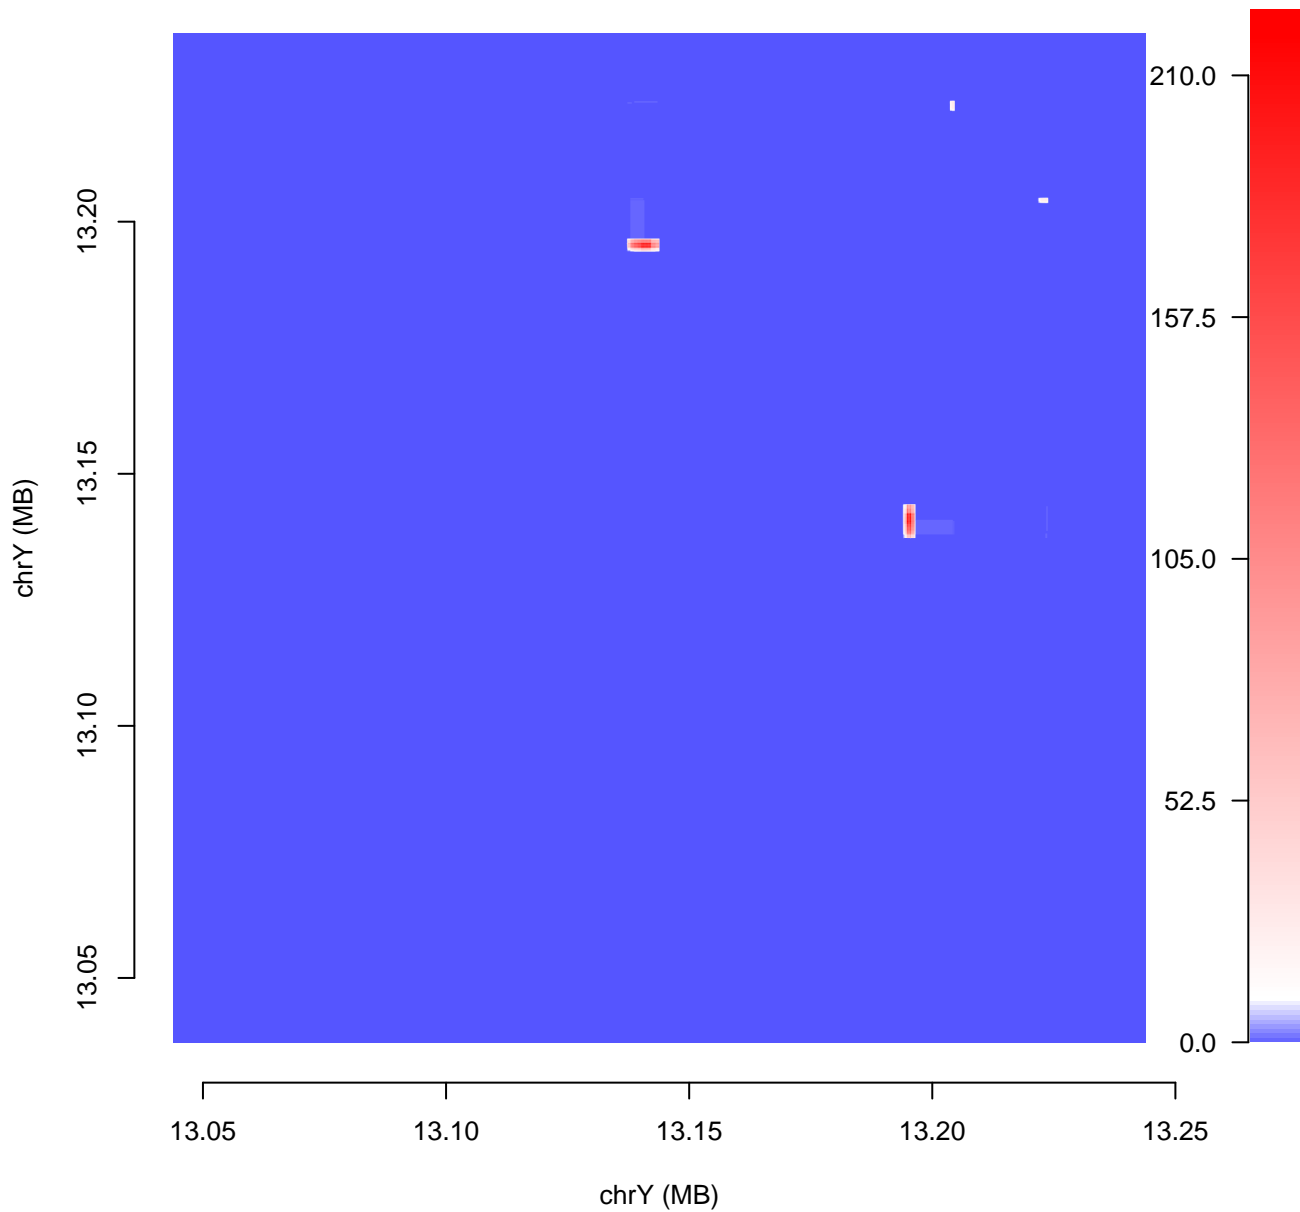

K562 chr21:10,779,012::chr17:25,265,107--

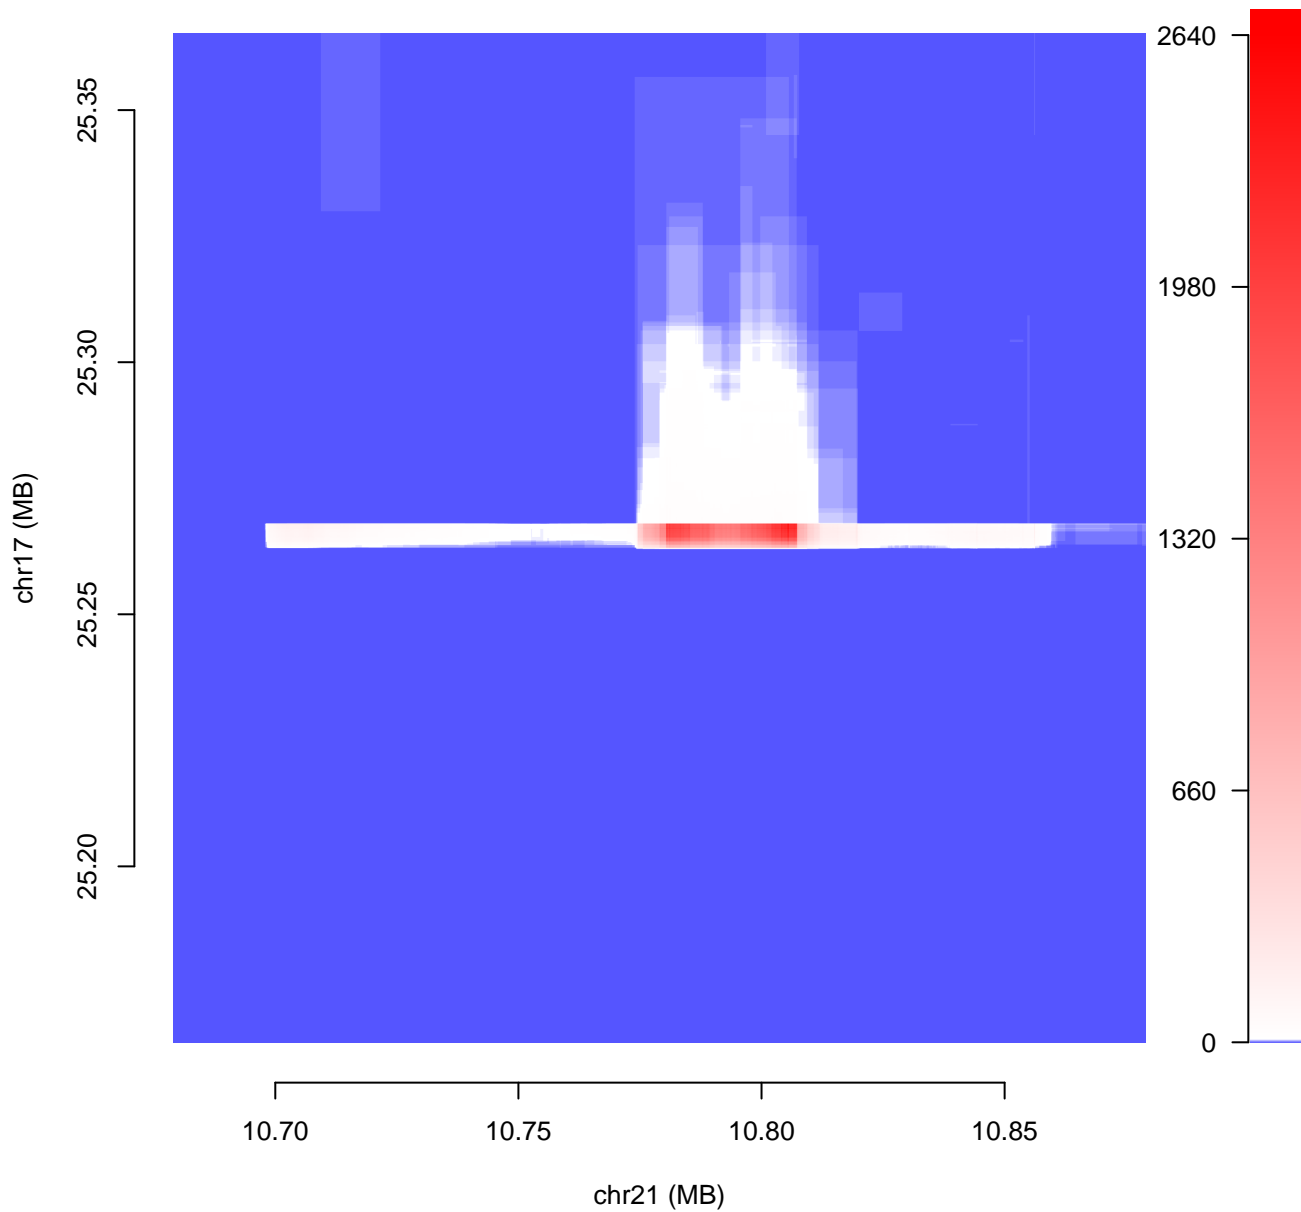

K562 chr17:25,267,990::chr16:33,864,975+-

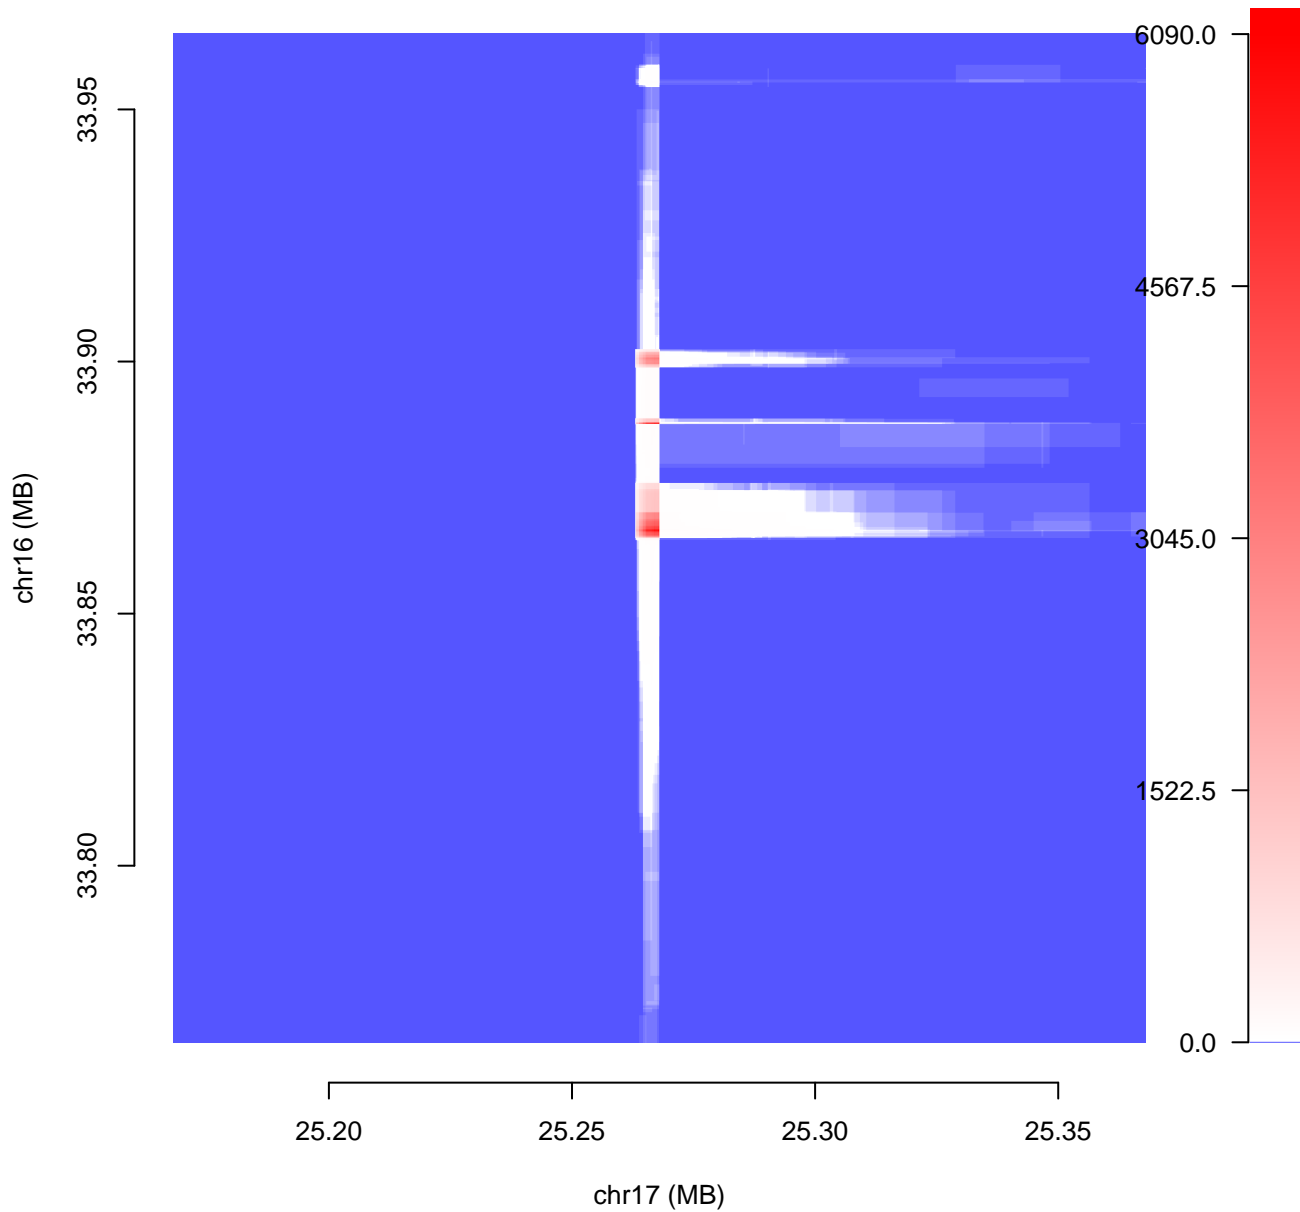

K562 chr16:33,898,680::chrY:58,983,274-+

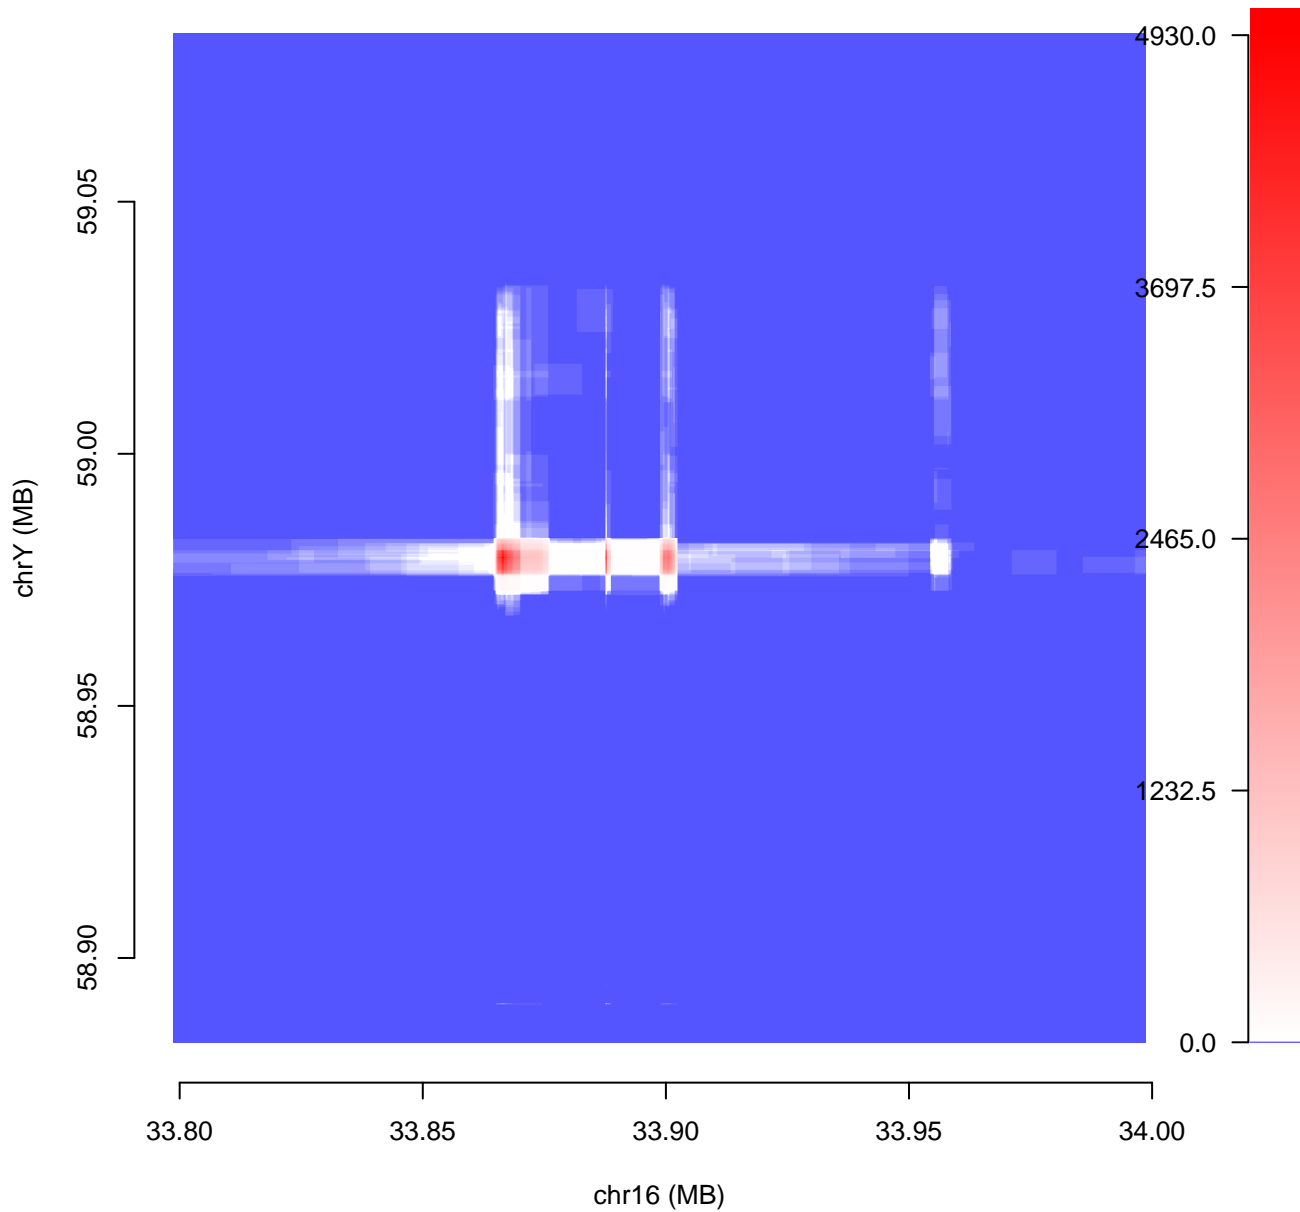

K562 chr16:33,870,001::chrY:58,975,757+-

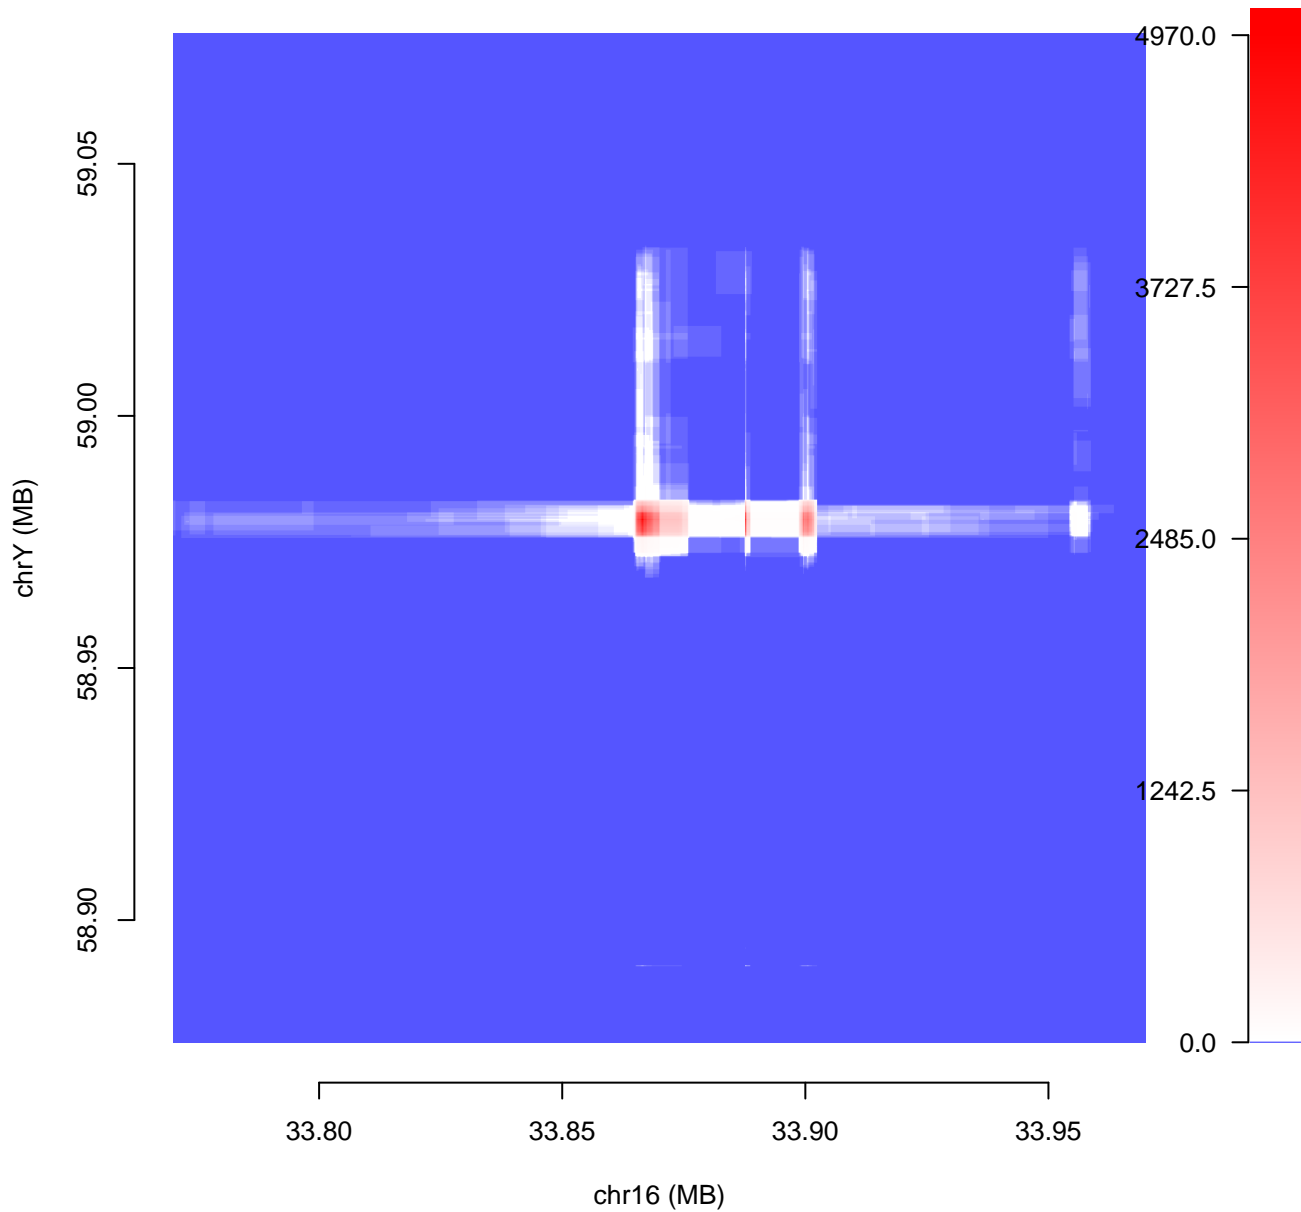

K562 chr16:33,870,001::chr16:33,864,975+-

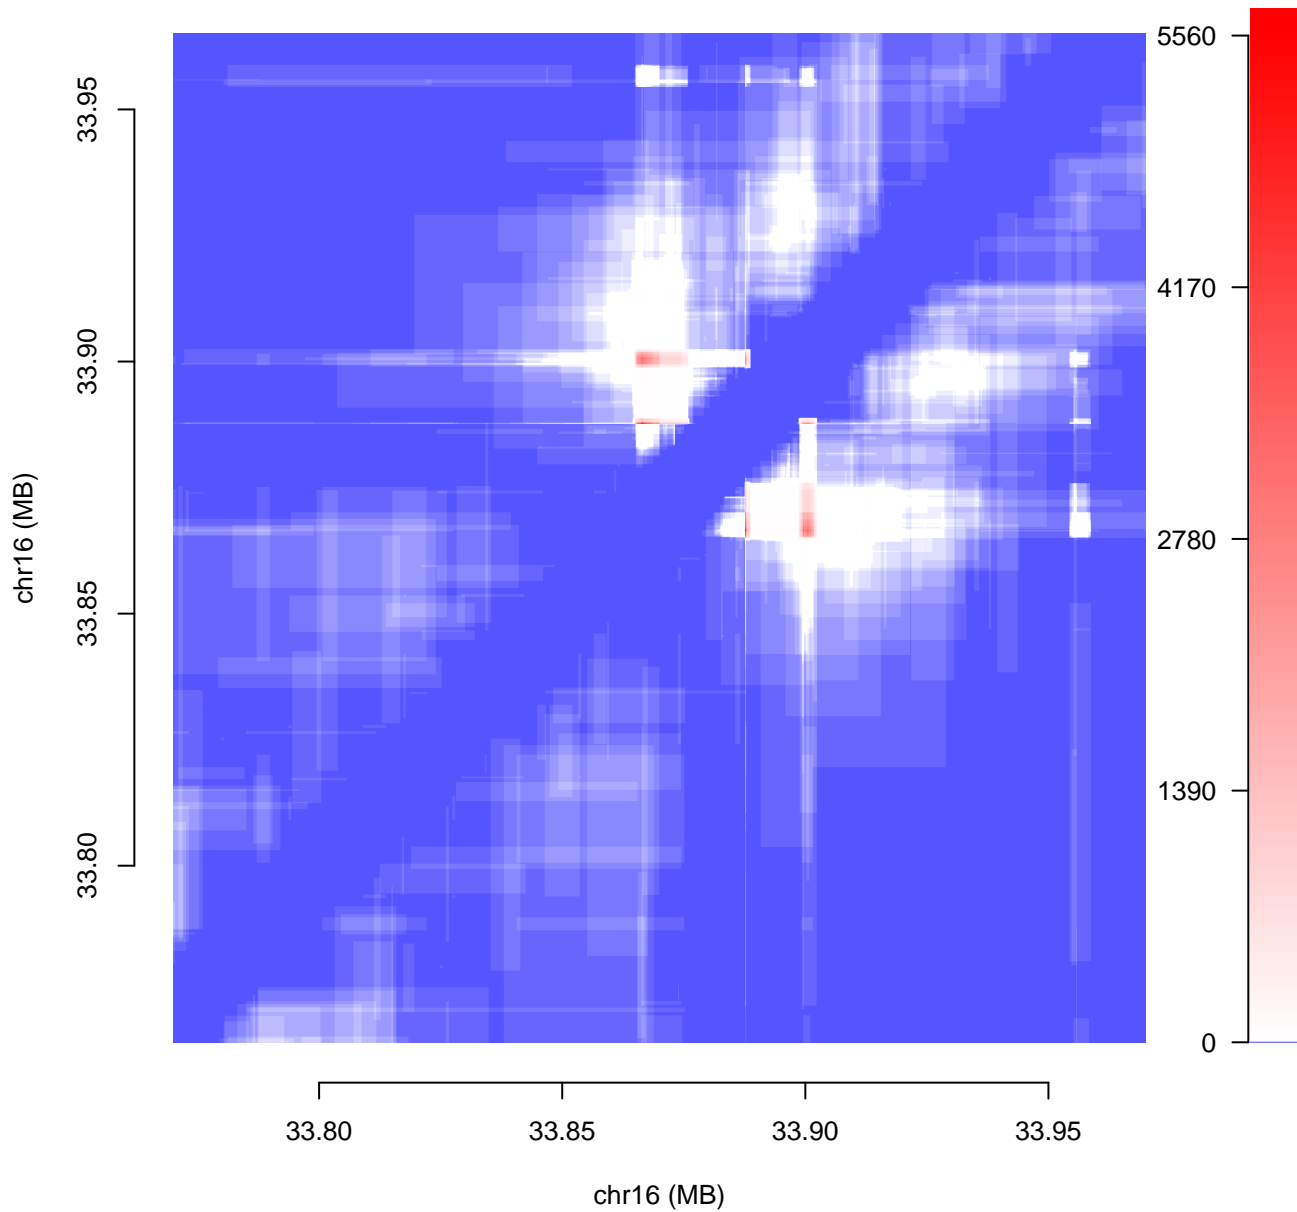



K562 chrY:28,791,445::chrY:28,784,319+-

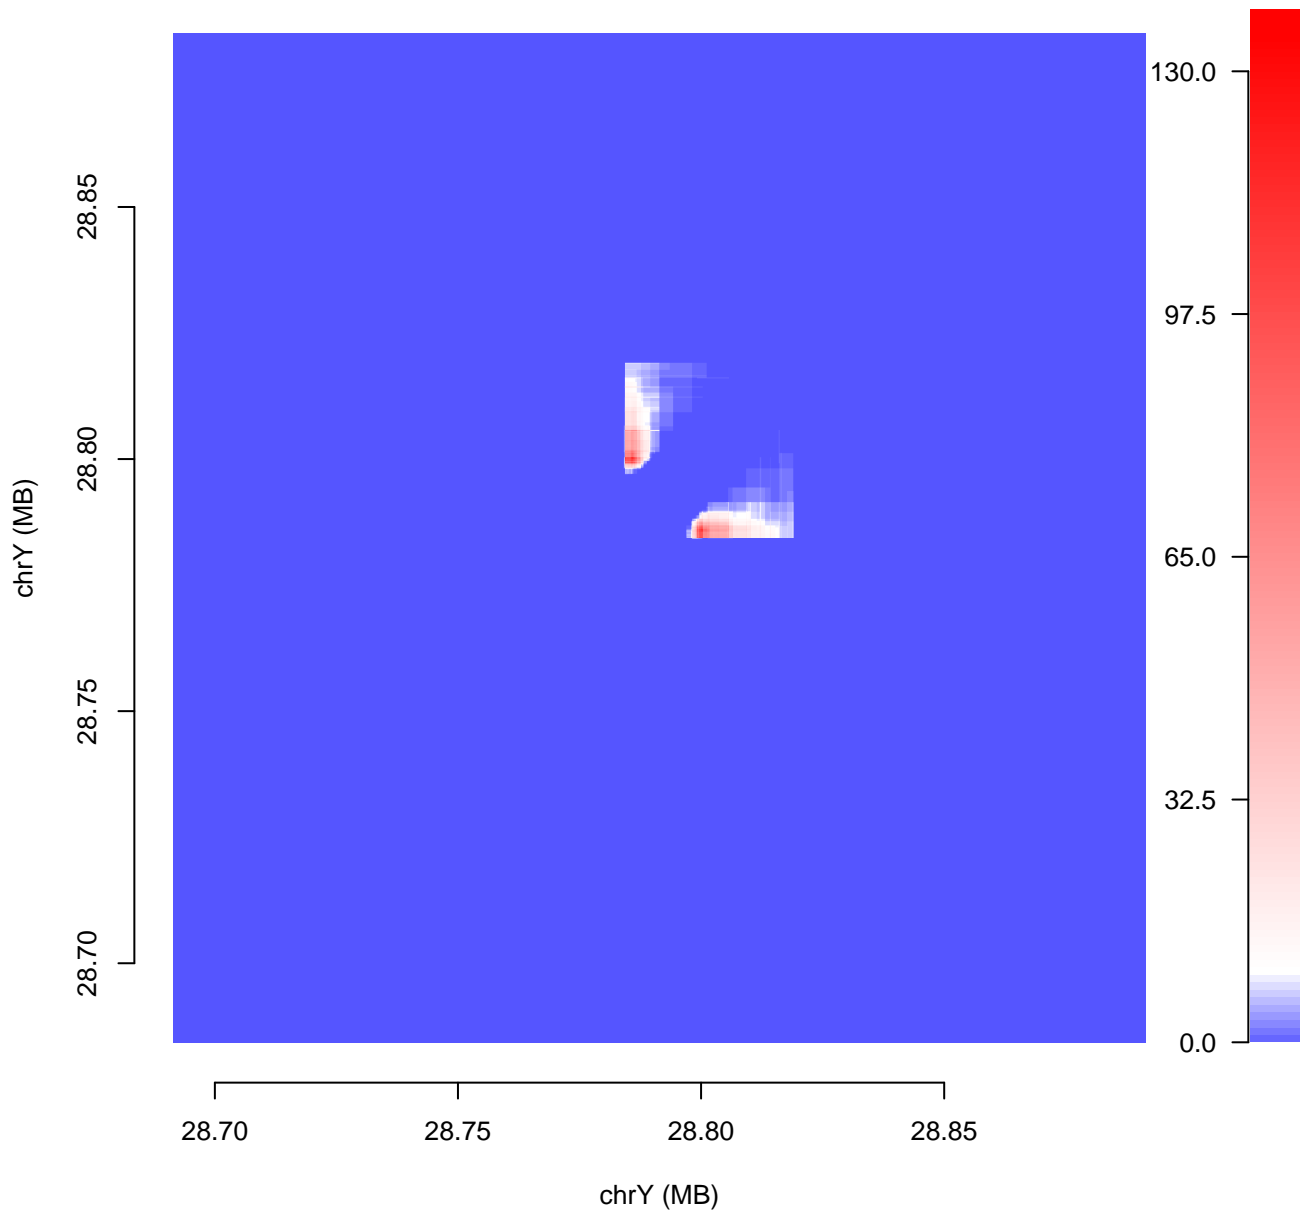

K562 chr16:33,864,975::chr16:33,887,846-+

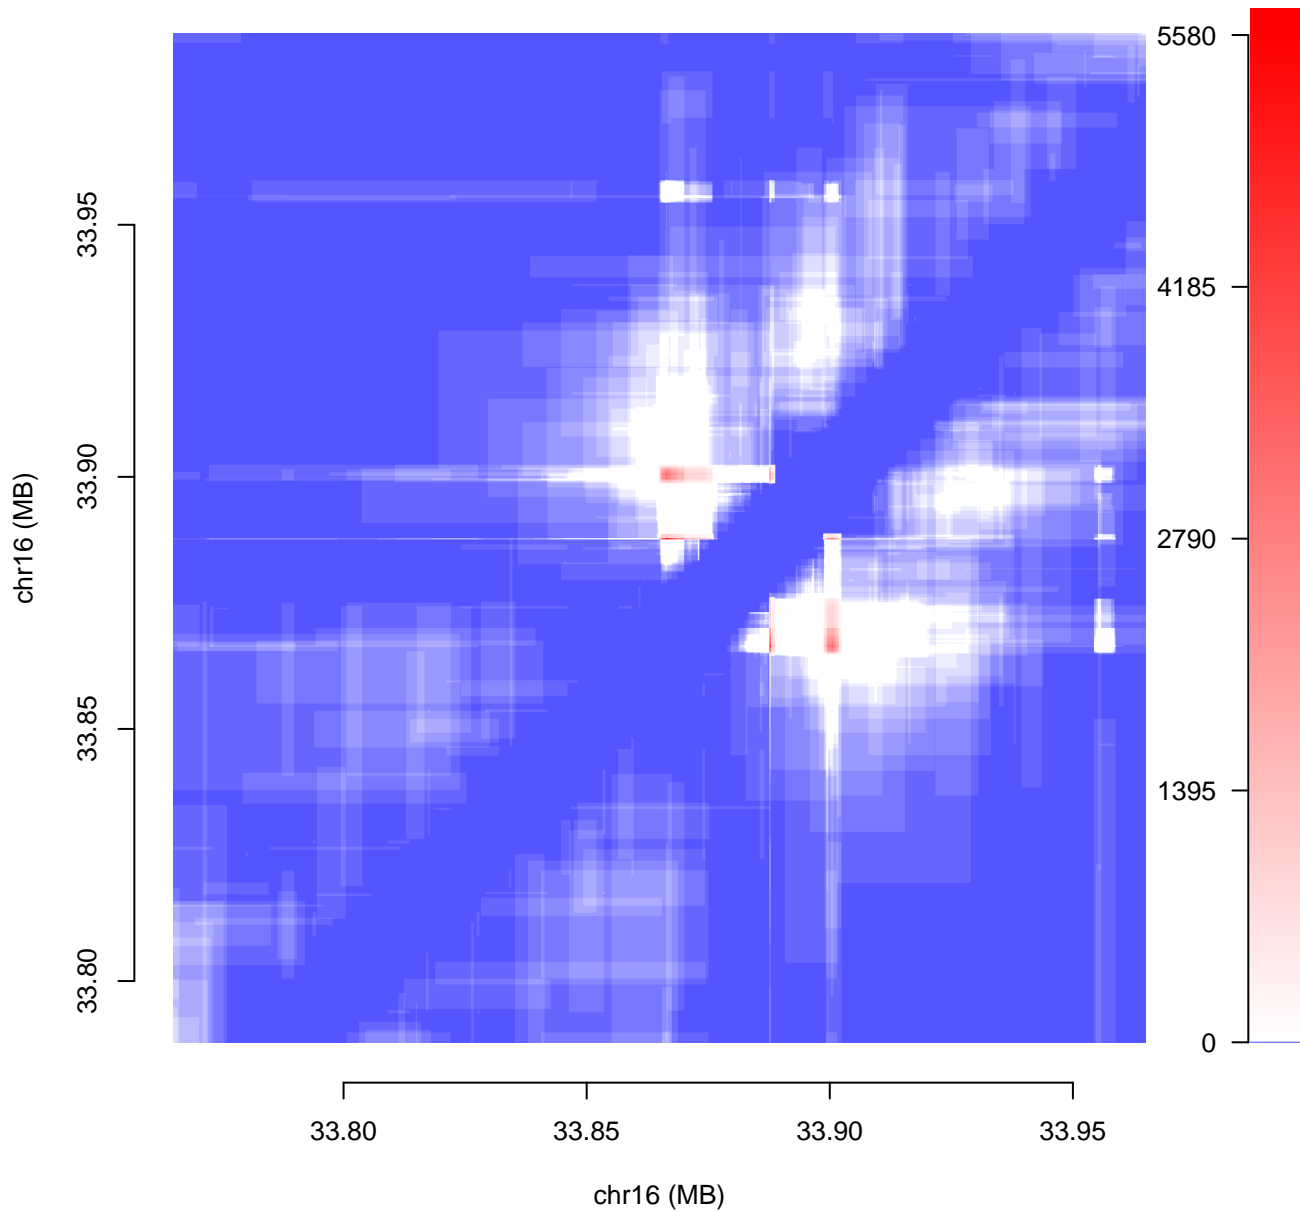

K562 chr16:33,864,975::chr16:33,901,801-+

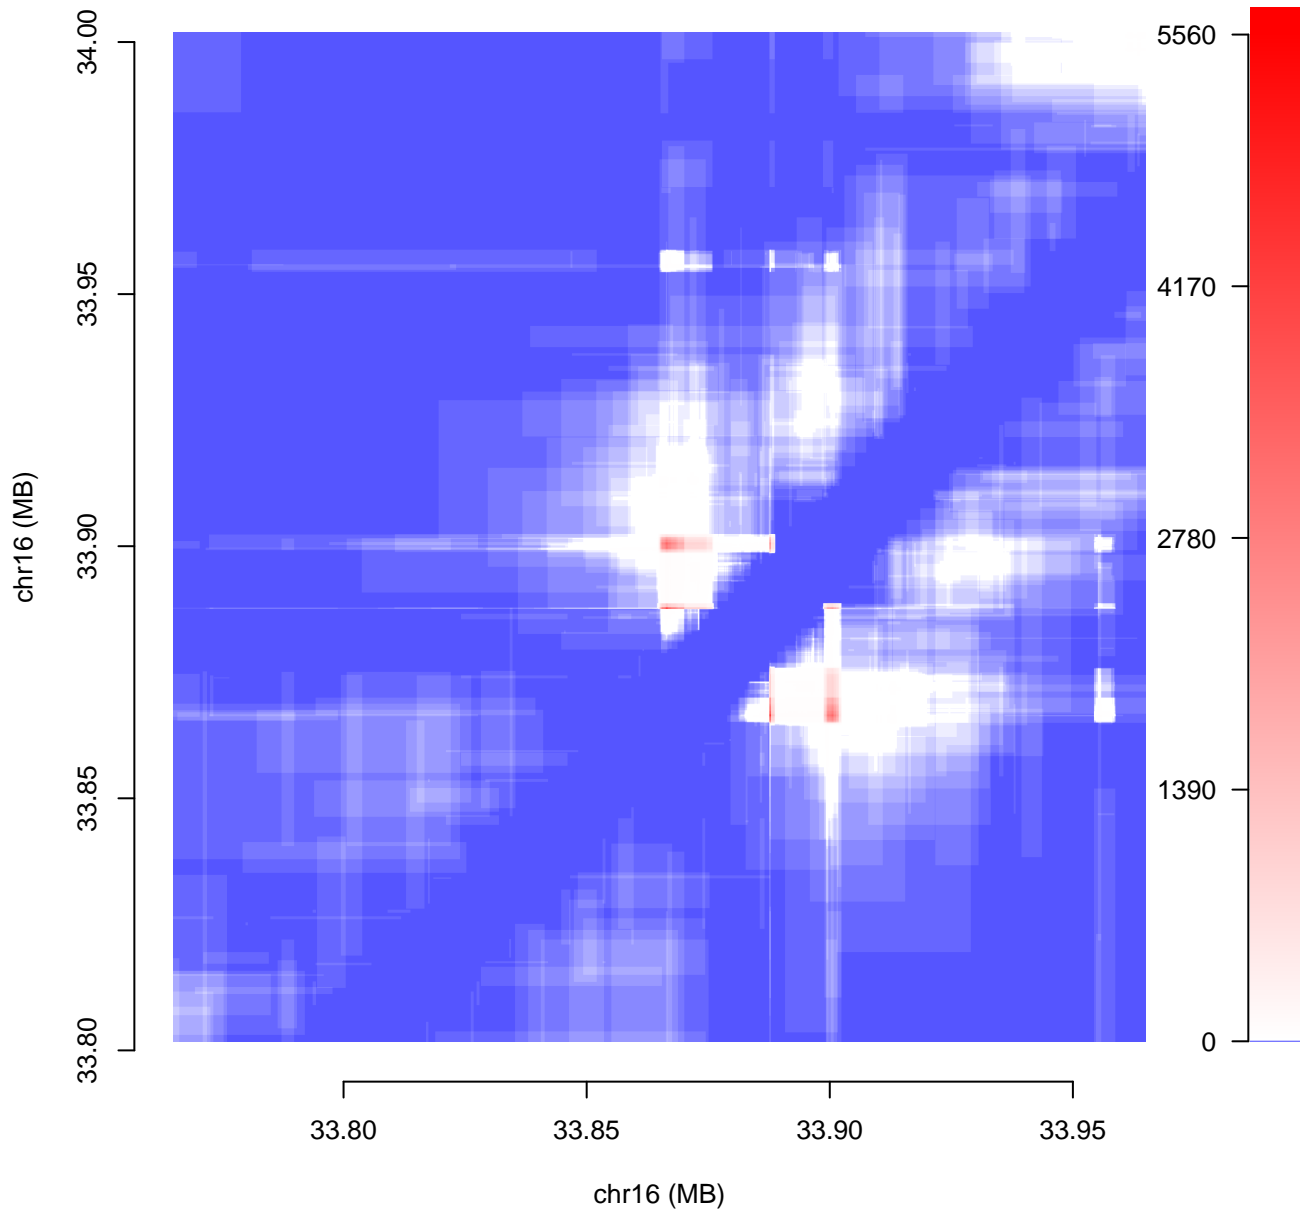

K562 chr16:33,901,801::chrY:13,137,237+-

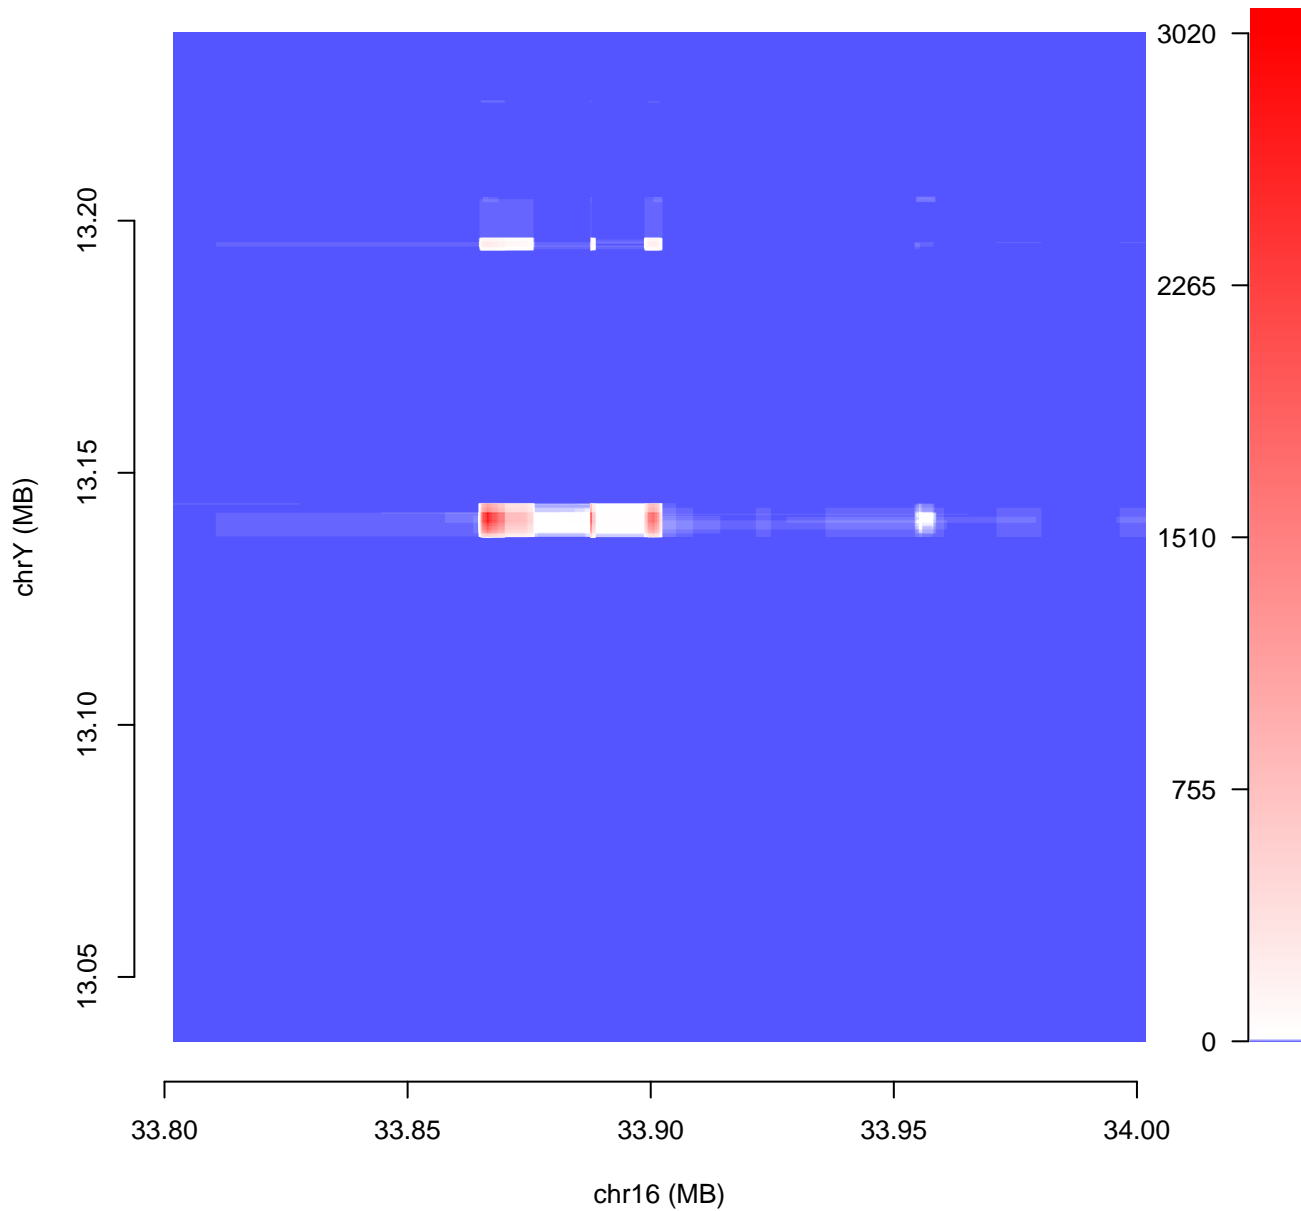

K562 chr1:142,535,434::chrY:13,447,559--

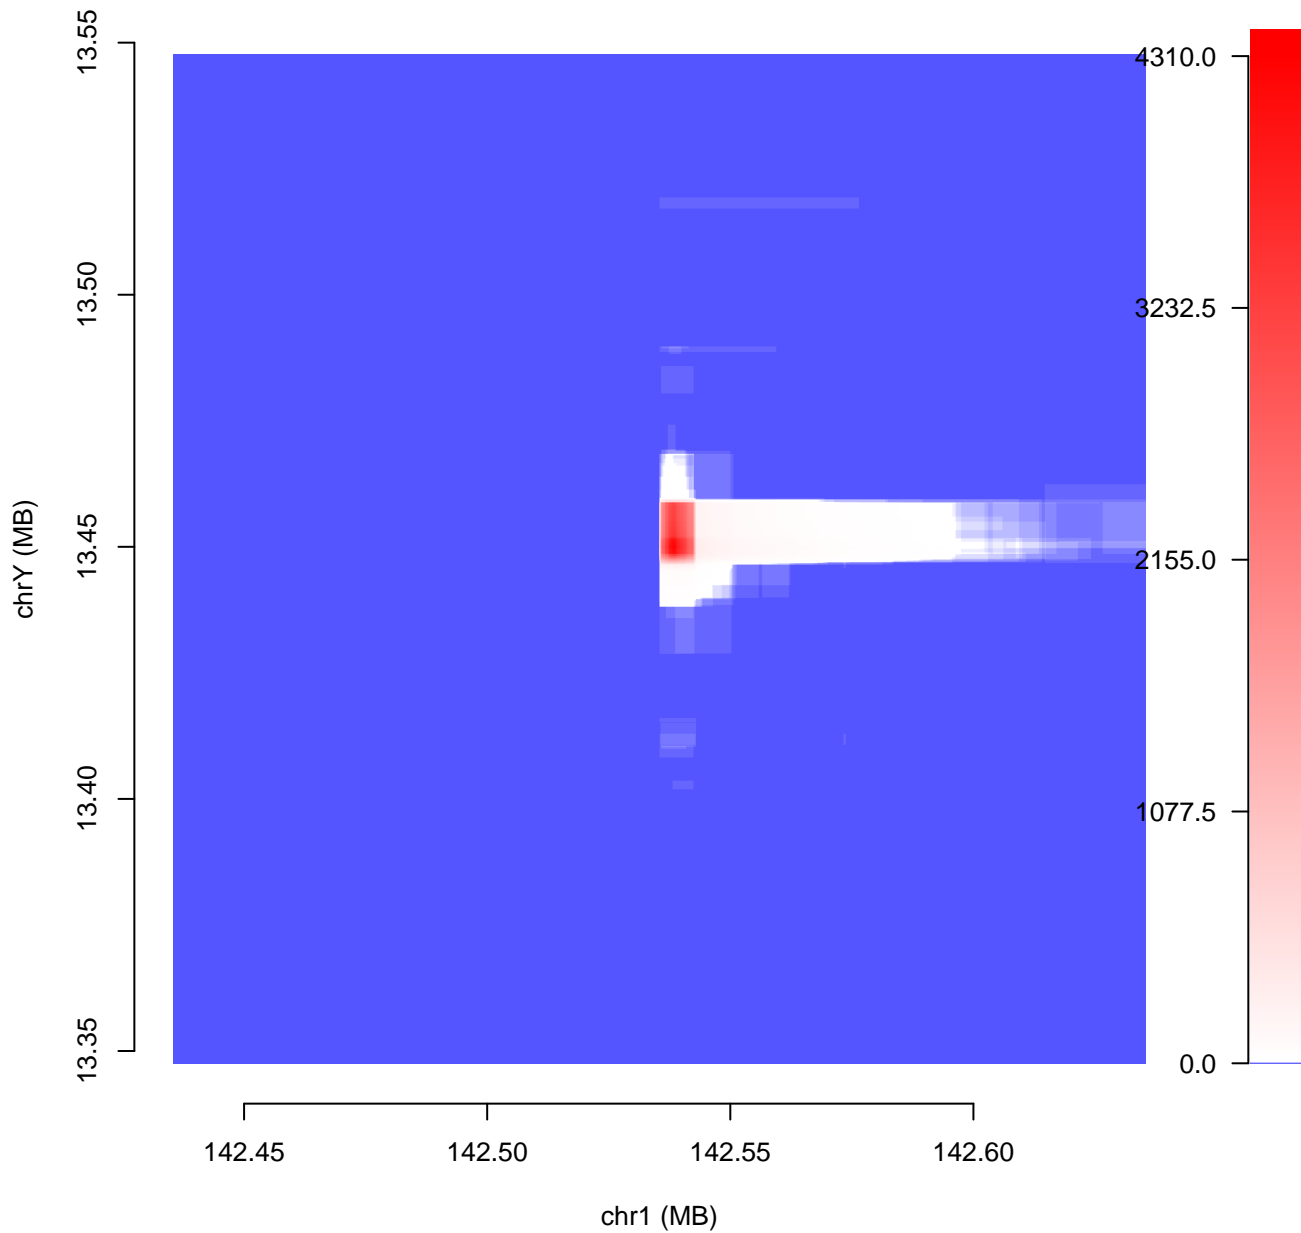

K562 chr1:142,535,434::chr1:142,542,885-+

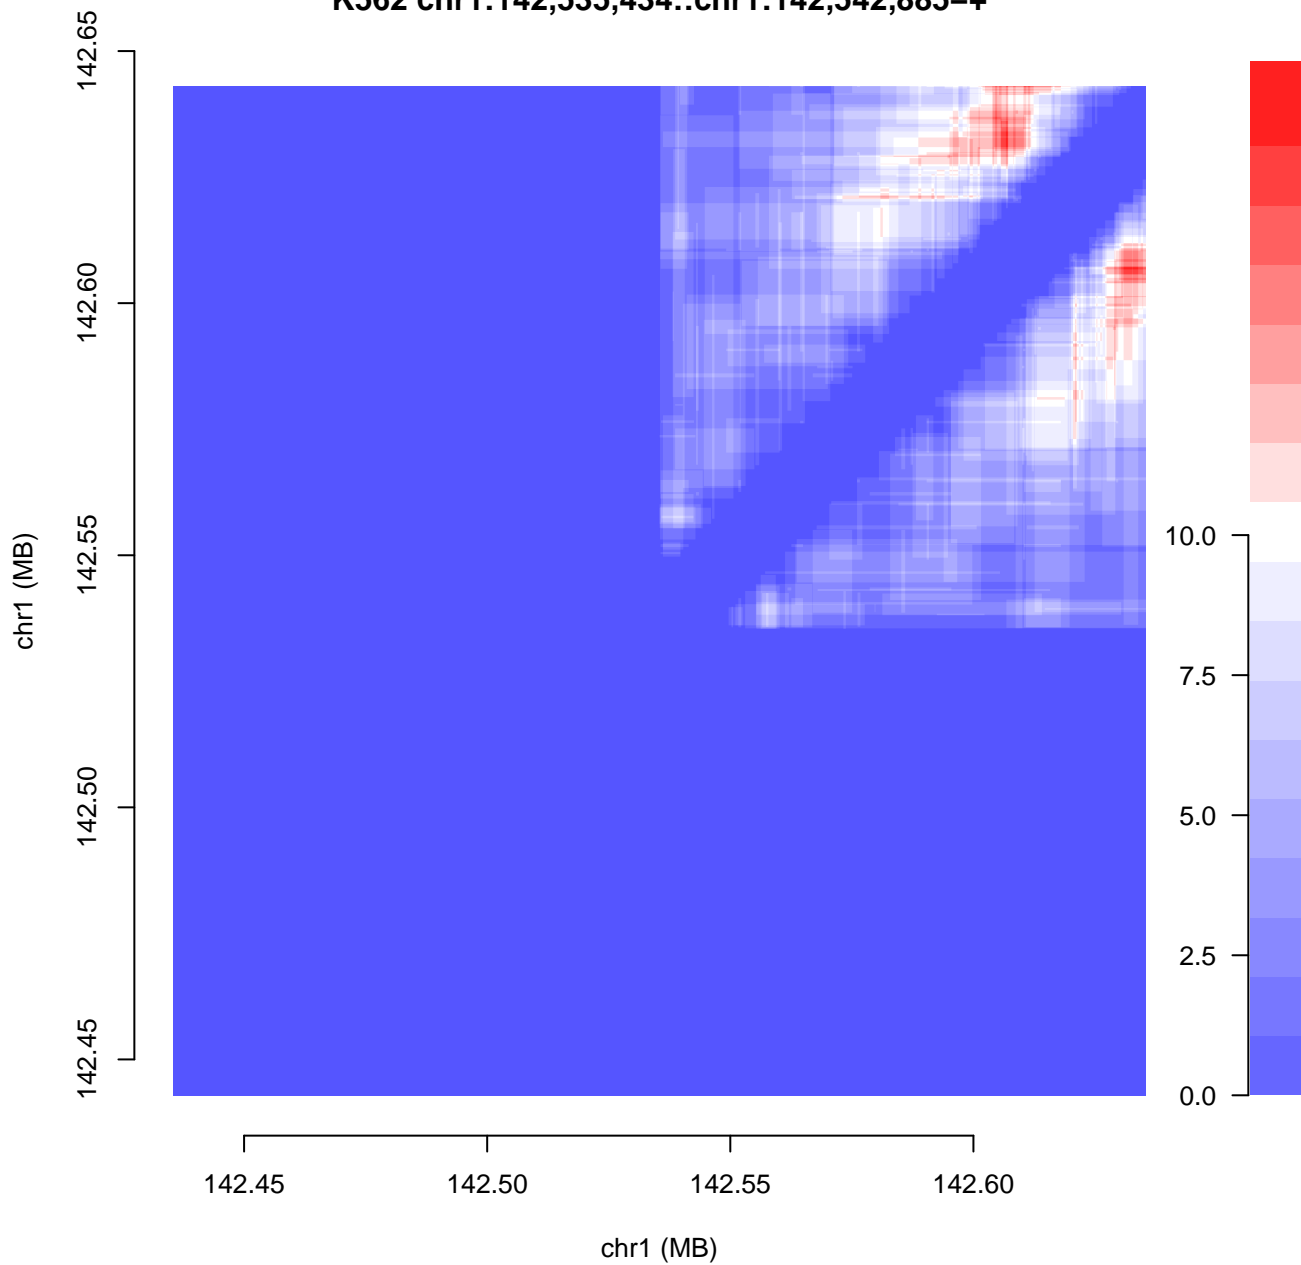

K562 chrY:13,459,379::chrY:13,447,559+--

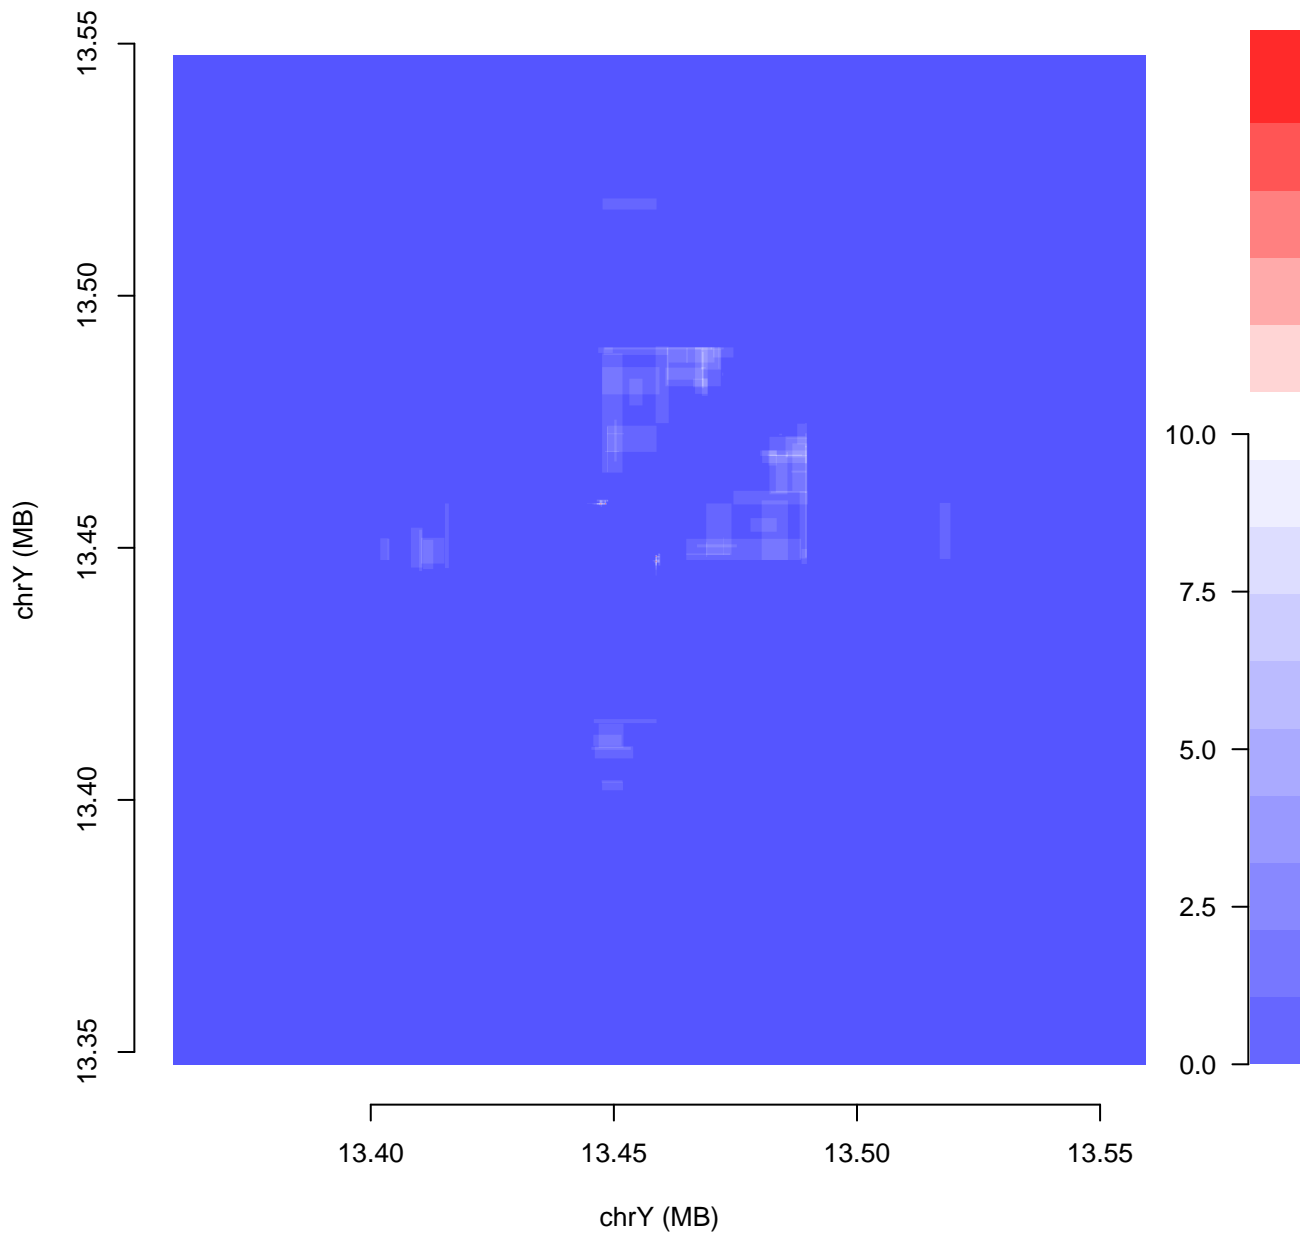

K562 chrY:58,983,274::chrY:58,975,757+-

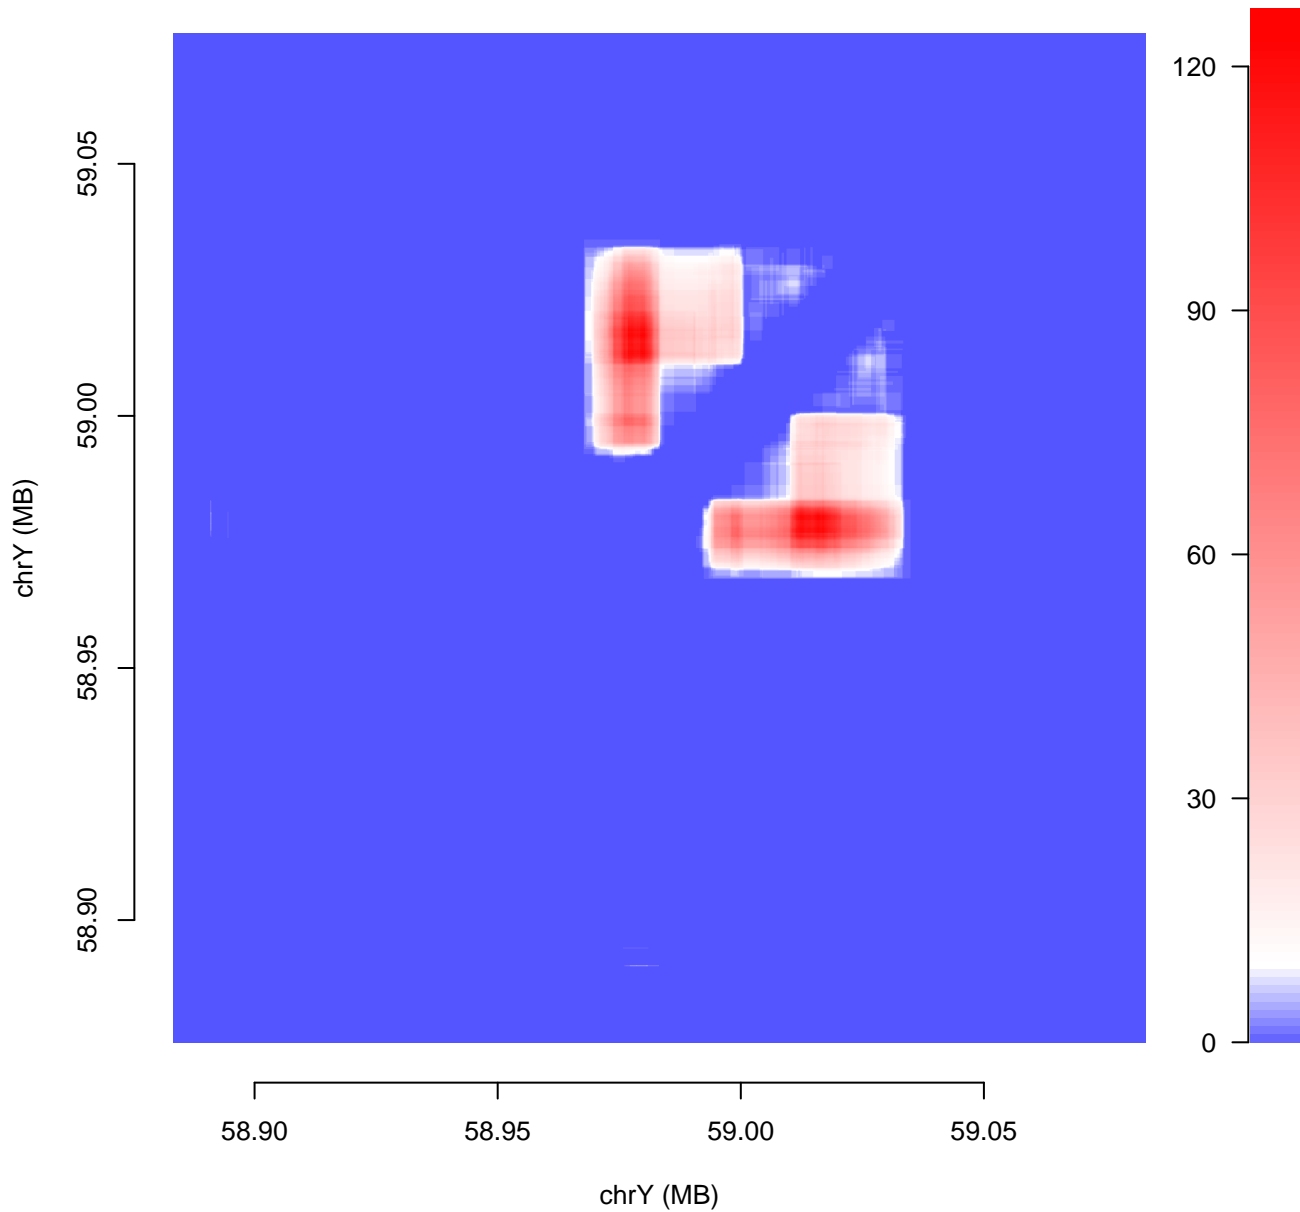



K562 chr16:33,887,846::chrY:28,784,319+-

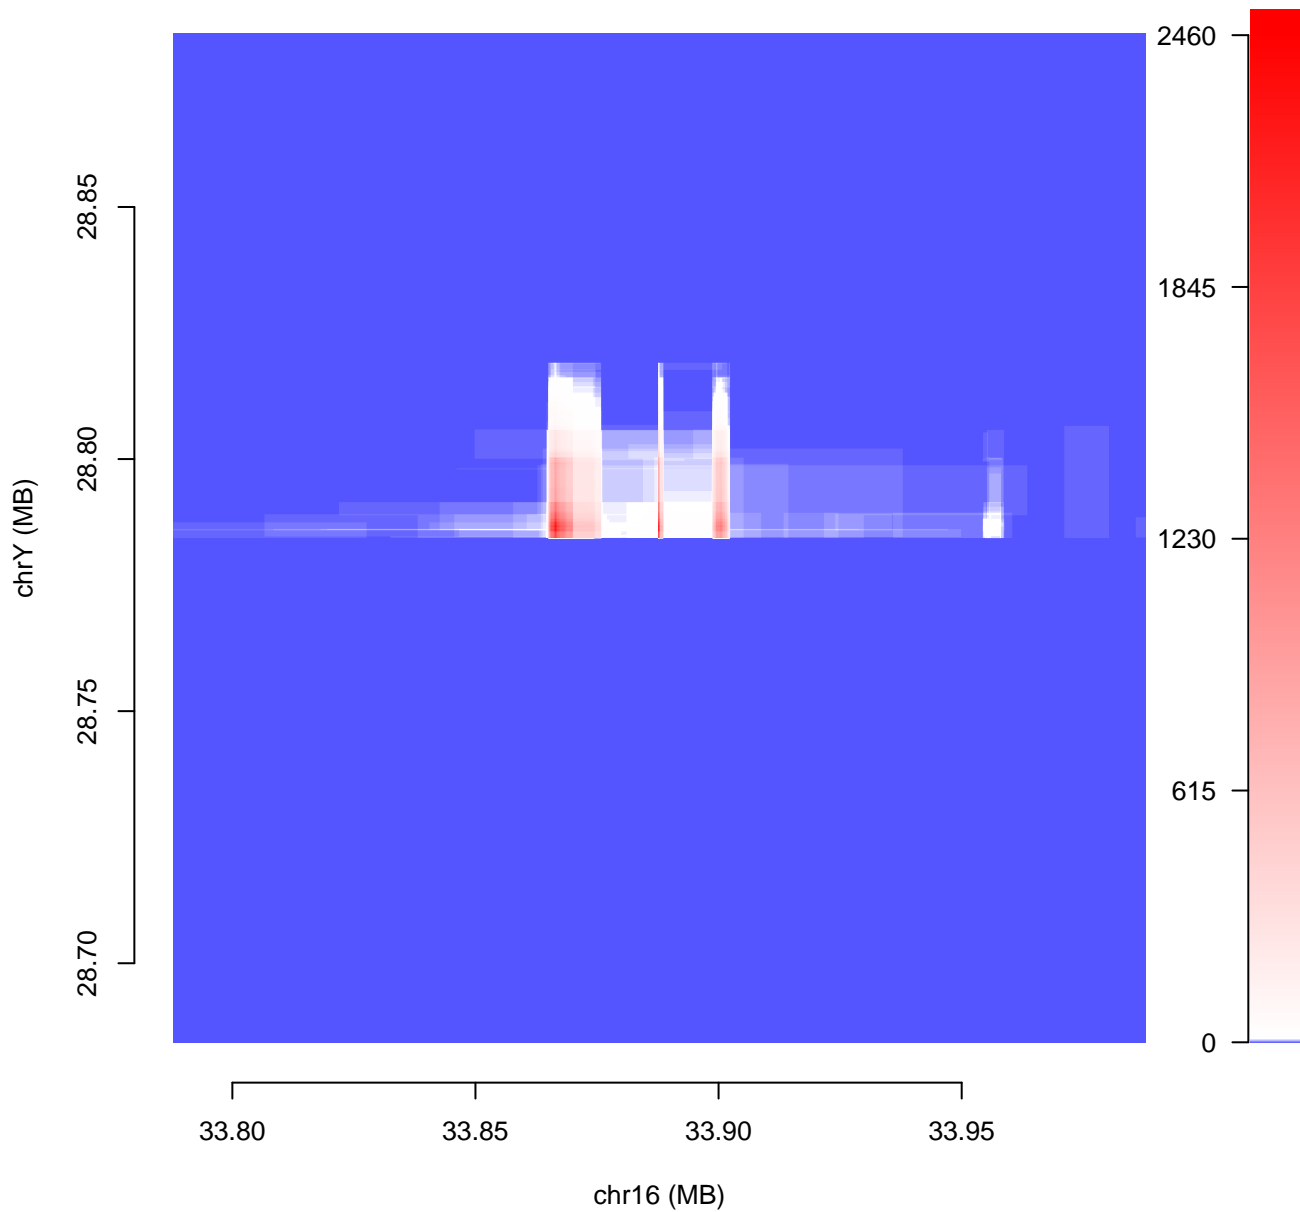

K562 chr1:142,542,885::chr21:10,084,918+-

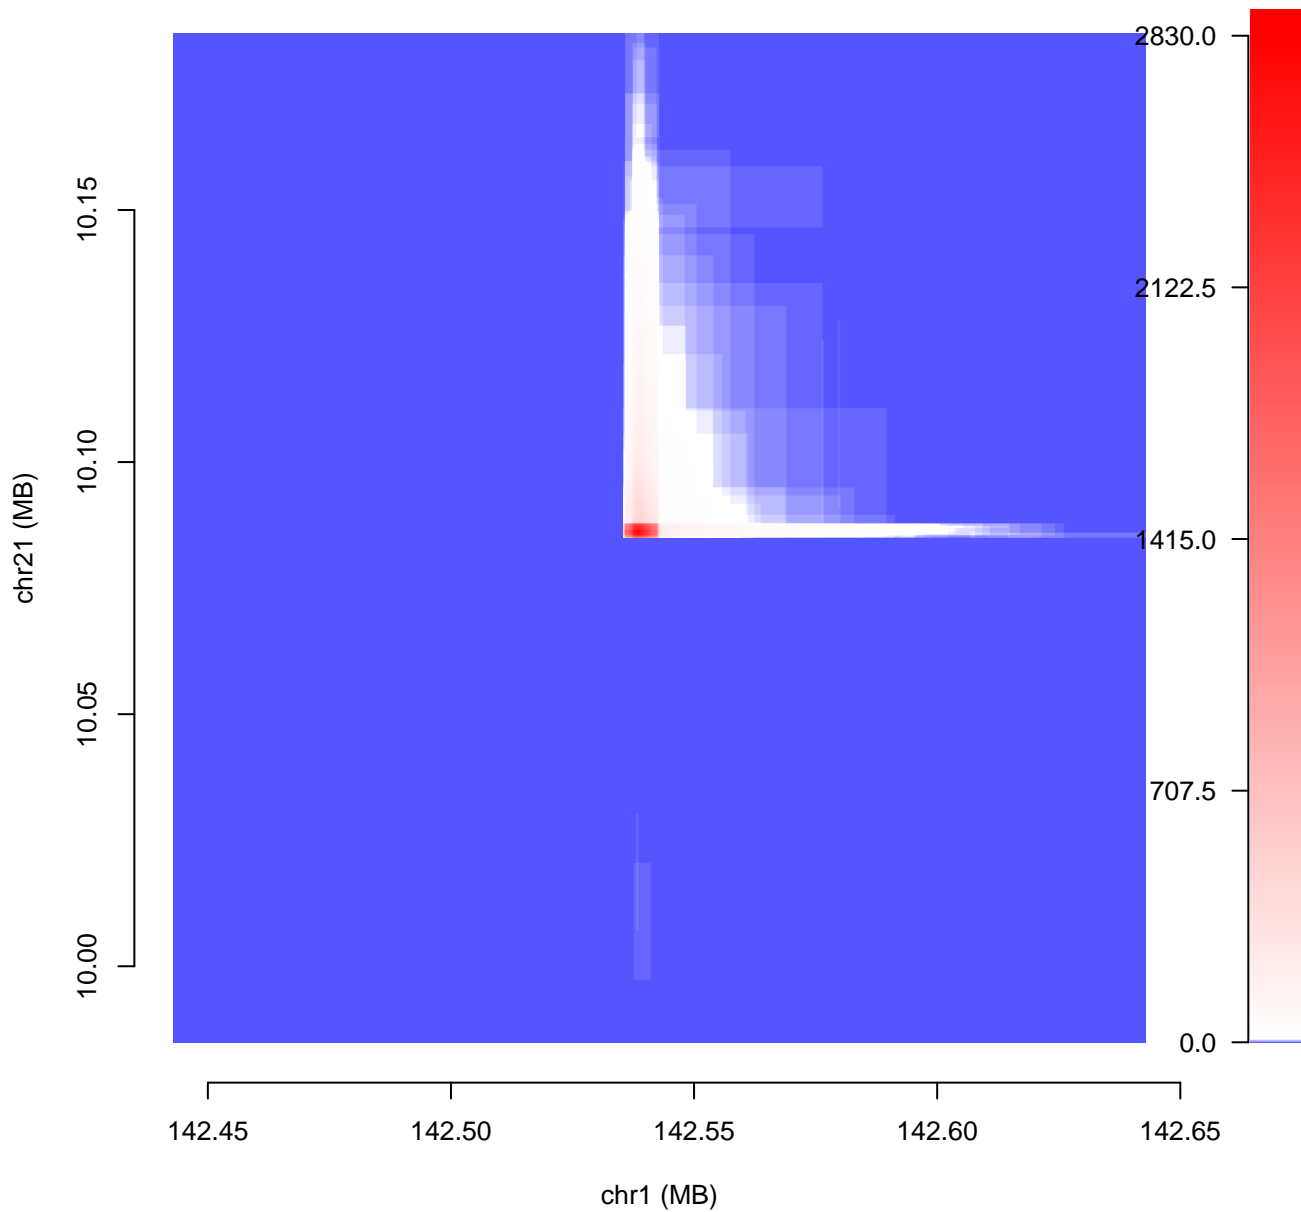

Supplement: Supplemental_Data.zip [file event_167.pdf › event_167.pdf]
