# Supplementary material for: Comprehensive, integrated, and phased whole-genome analysis of the primary ENCODE cell line K562
Source: HighWire-hosted journal article supplement (doi:10.1101/gr.234948.118), 2019-02-08

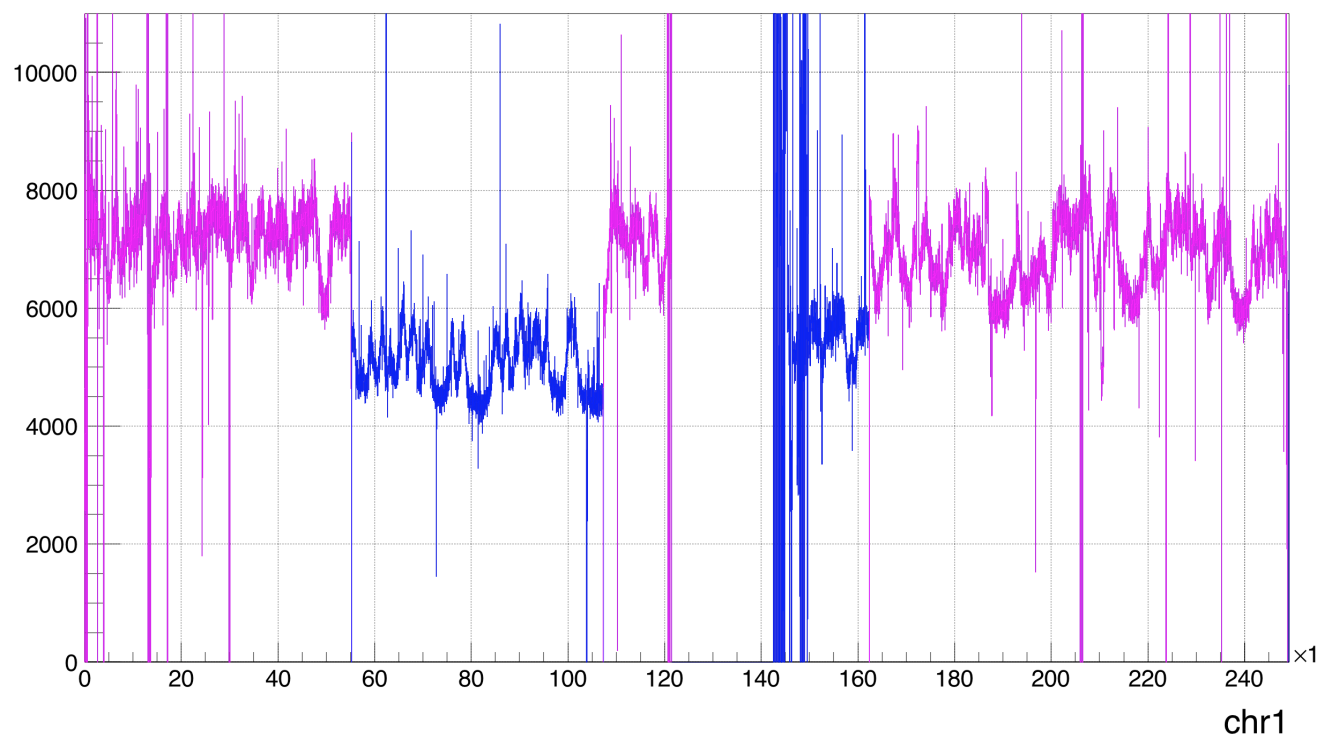

chr1 segmentation for 289361\_WG\_K562vsFemalePool\_2009-03-24\_532 vs. 289361\_WG\_K562vsFemalePool\_2009-03-24\_635 (289361\_WG\_K562vsFemalePool\_2009-03-24\_unavg) - 83 segments

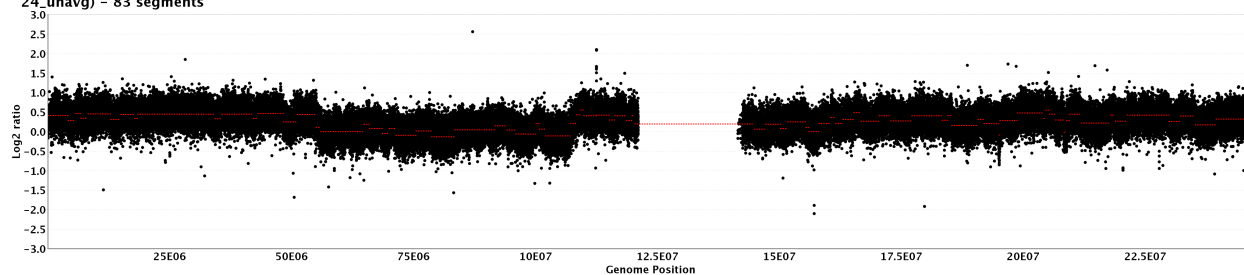

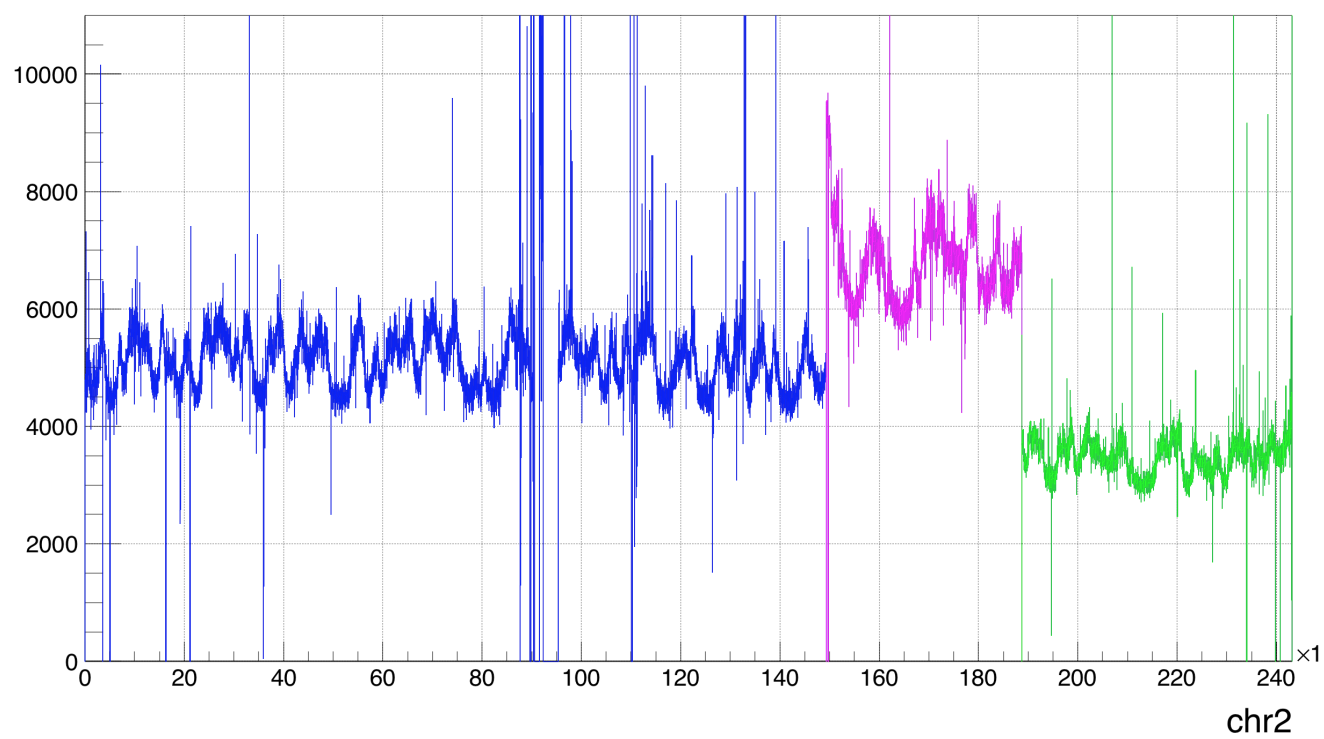

chr2 segmentation for 289361\_WG\_K562vsFemalePool\_2009-03-24\_532 vs. 289361\_WG\_K562vsFemalePool\_2009-03-24\_635 (289361\_WG\_K562vsFemalePool\_2009-03-24\_unavg) - 68 segments

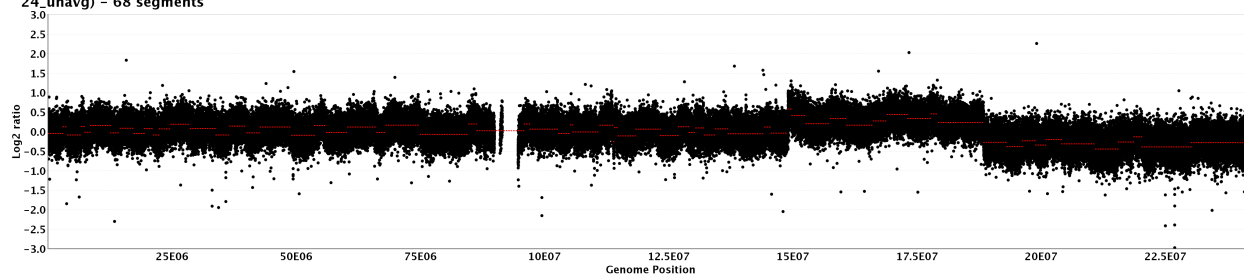

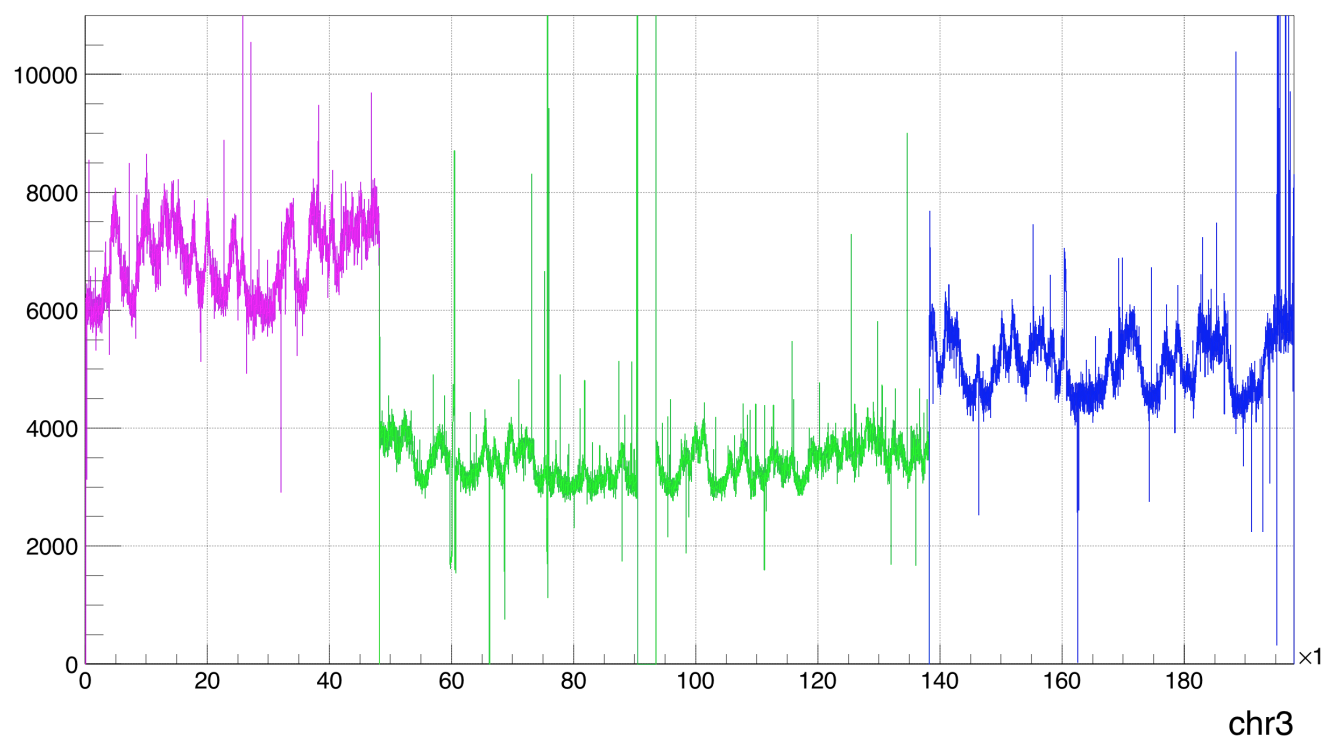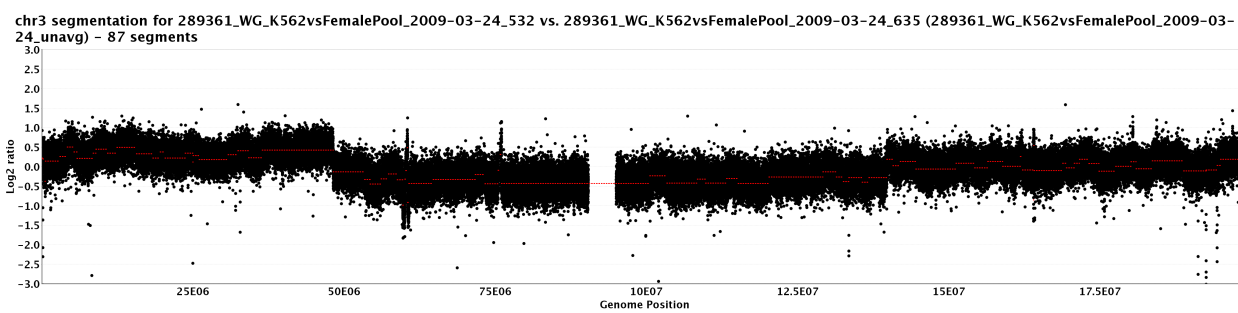

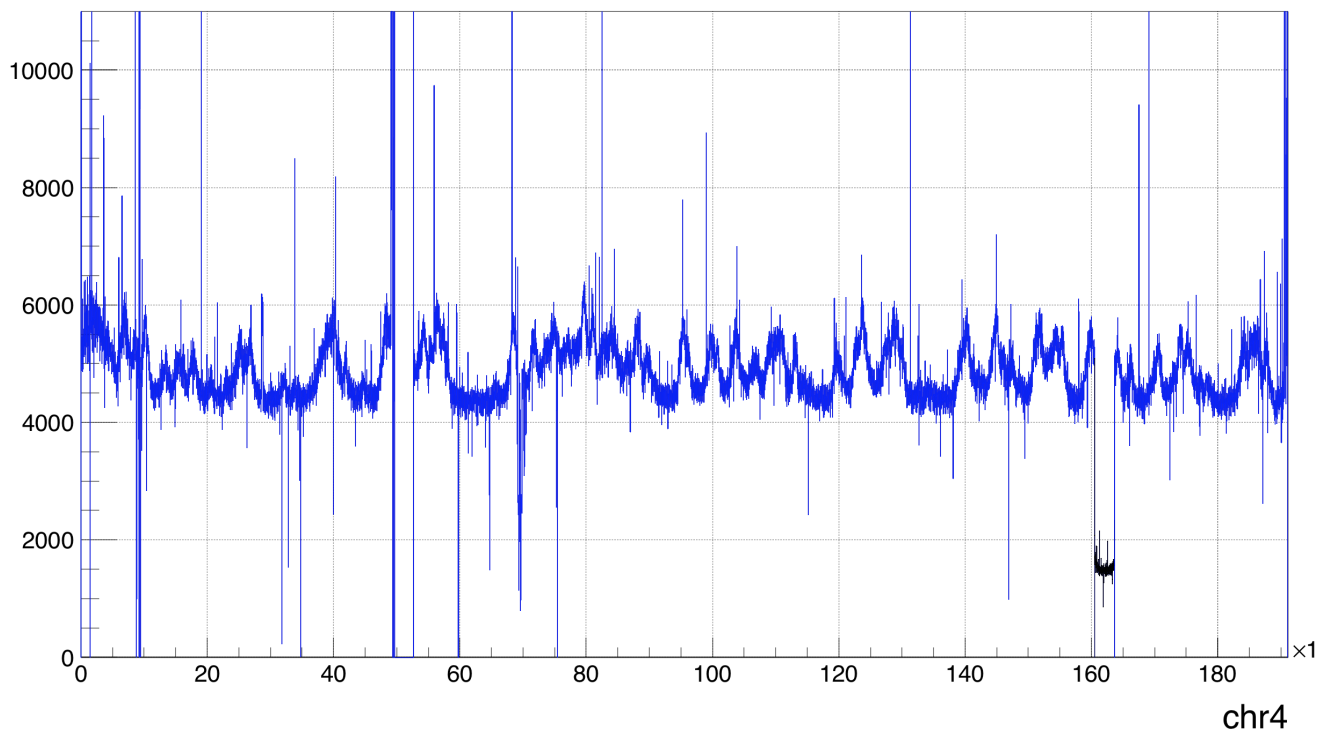

chr4 segmentation for 289361\_WG\_K562vsFemalePool\_2009-03-24\_532 vs. 289361\_WG\_K562vsFemalePool\_2009-03-24\_635 (289361\_WG\_K562vsFemalePool\_2009-03-24\_unavg) - 71 segments

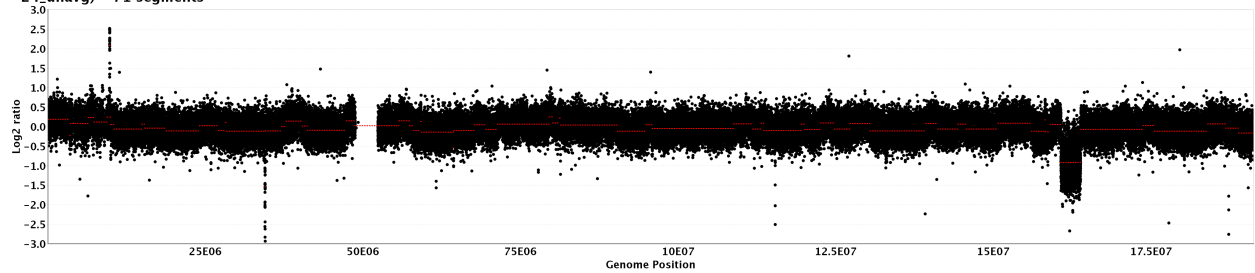



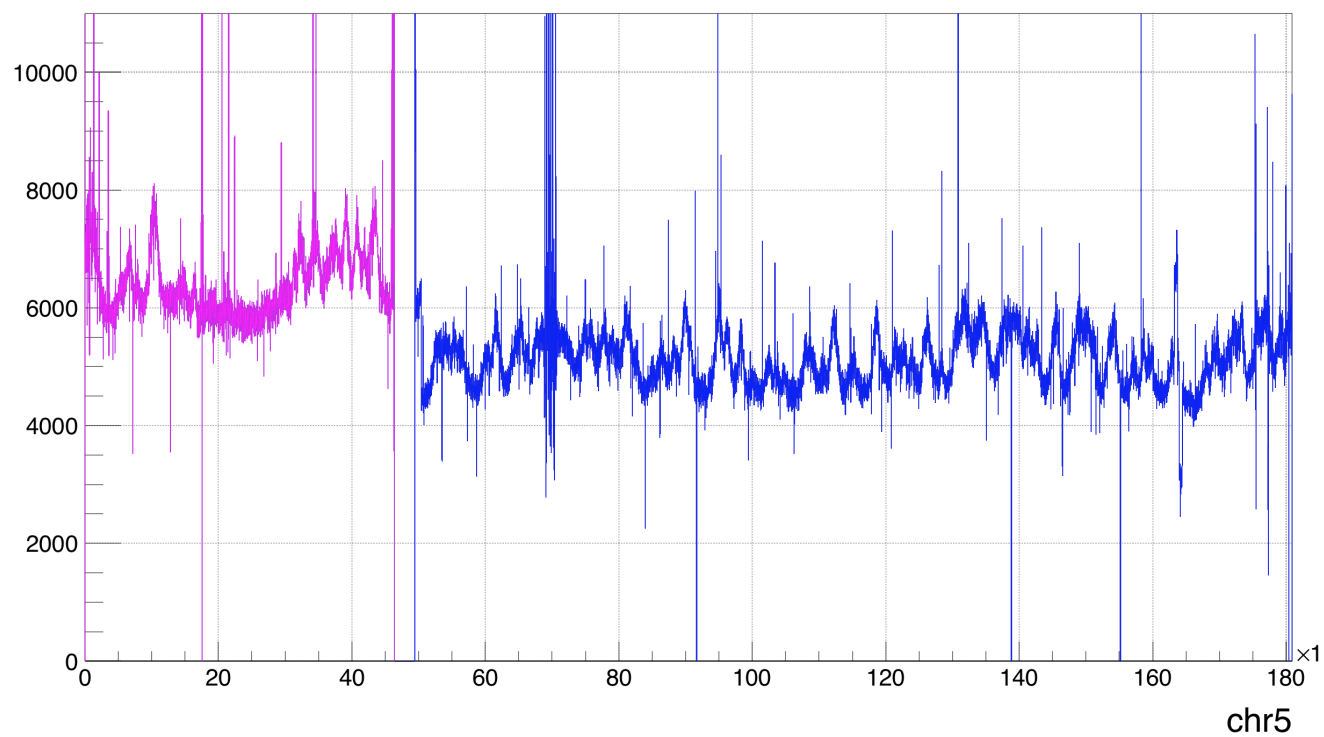

chr5 segmentation for 289361\_WG\_K562vsFemalePool\_2009-03-24\_532 vs. 289361\_WG\_K562vsFemalePool\_2009-03-24\_635 (289361\_WG\_K562vsFemalePool\_2009-03-24\_unavg) - 42 segments

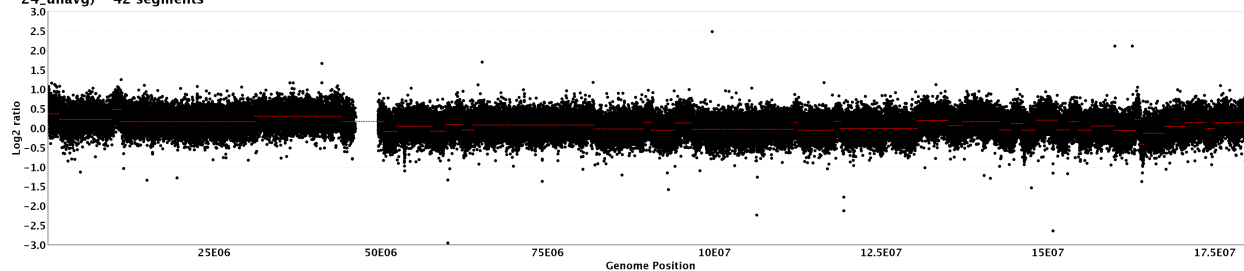

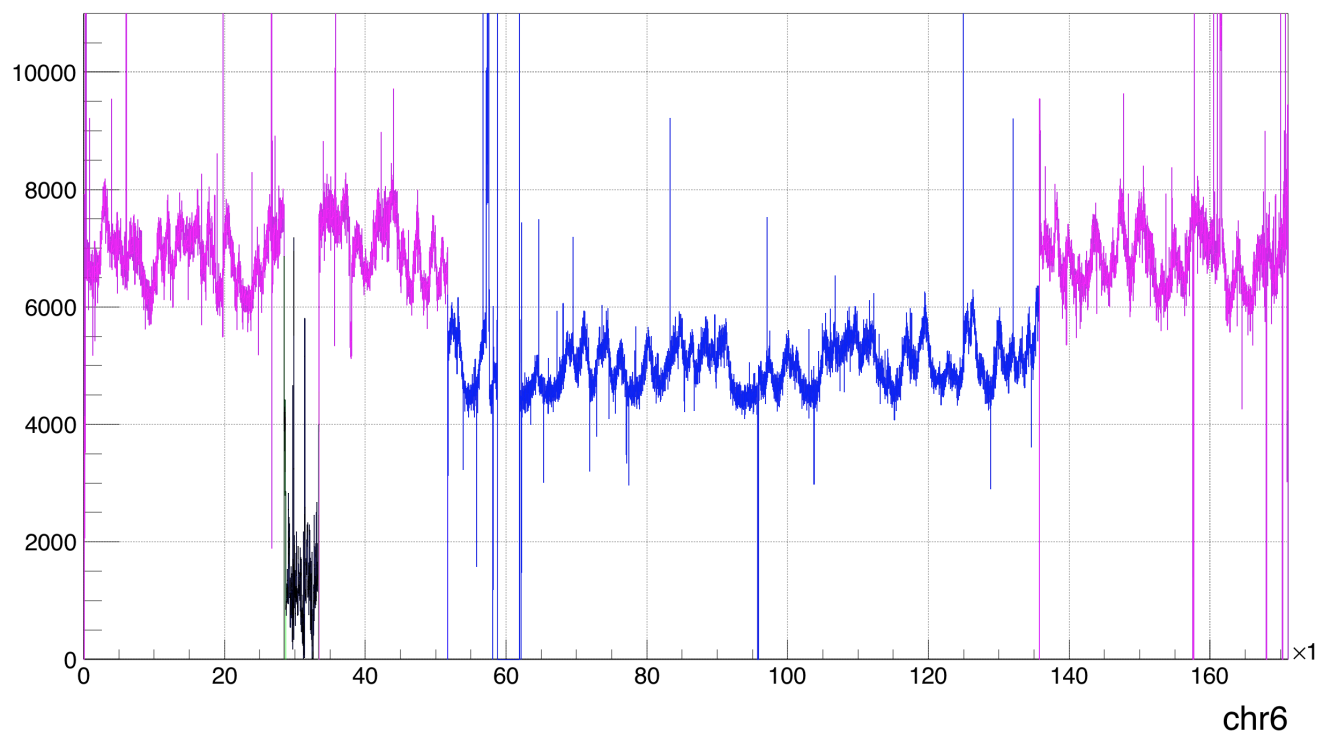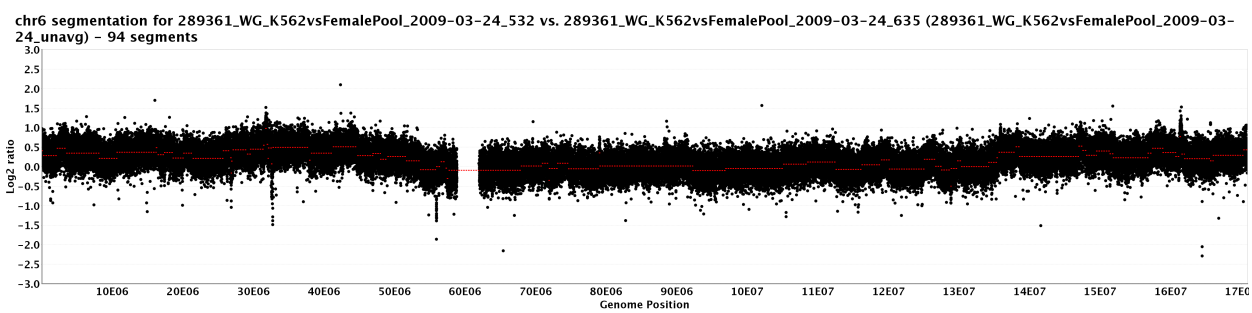

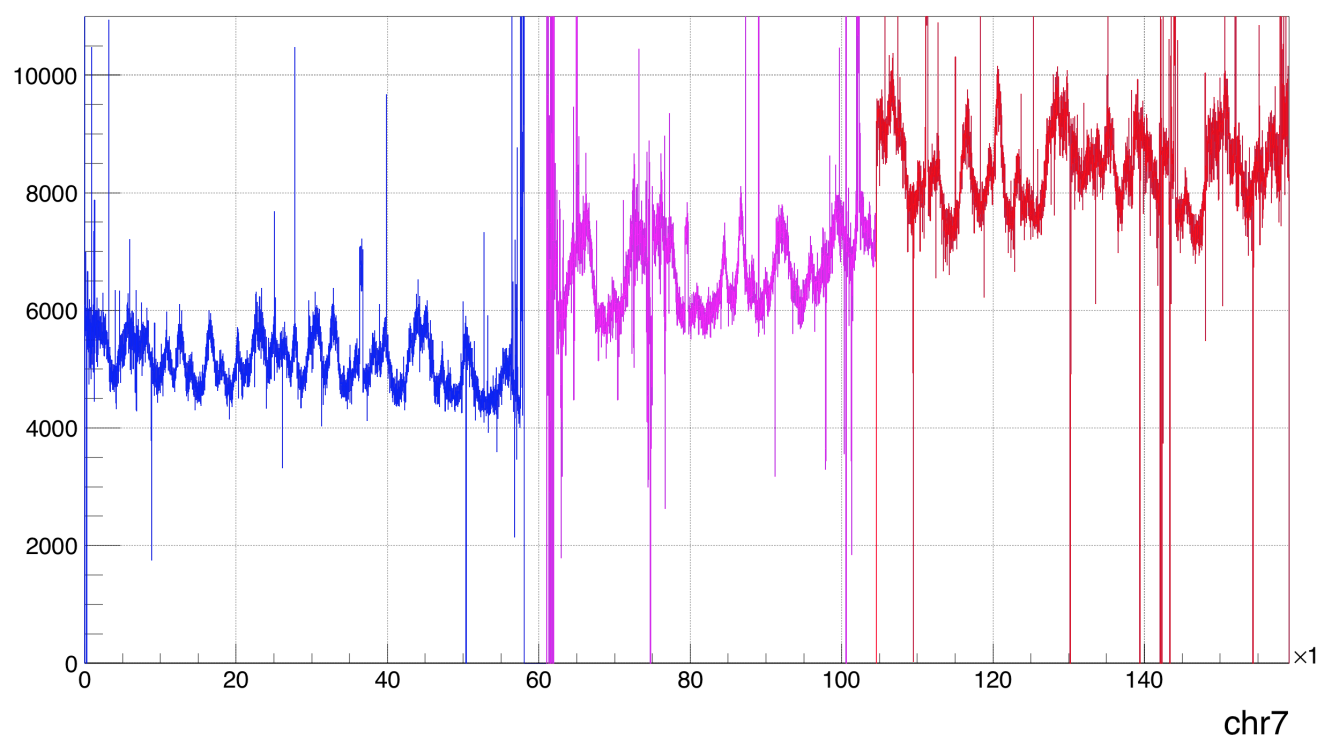

chr7 segmentation for 289361\_WG\_K562vsFemalePool\_2009-03-24\_532 vs. 289361\_WG\_K562vsFemalePool\_2009-03-24\_635 (289361\_WG\_K562vsFemalePool\_2009-03-24\_unavg) - 68 segments

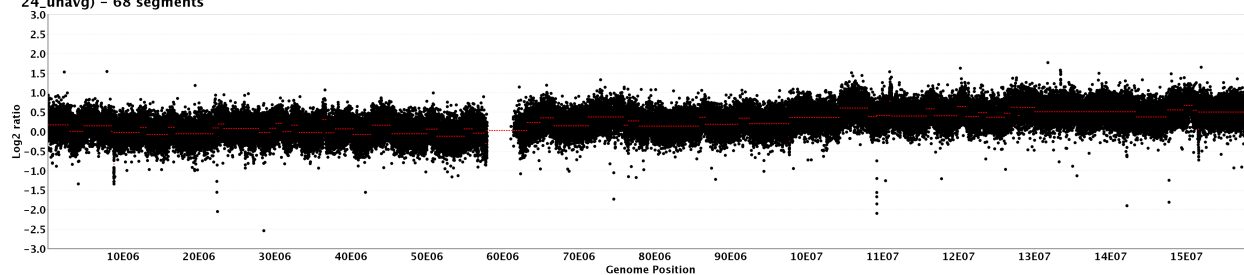

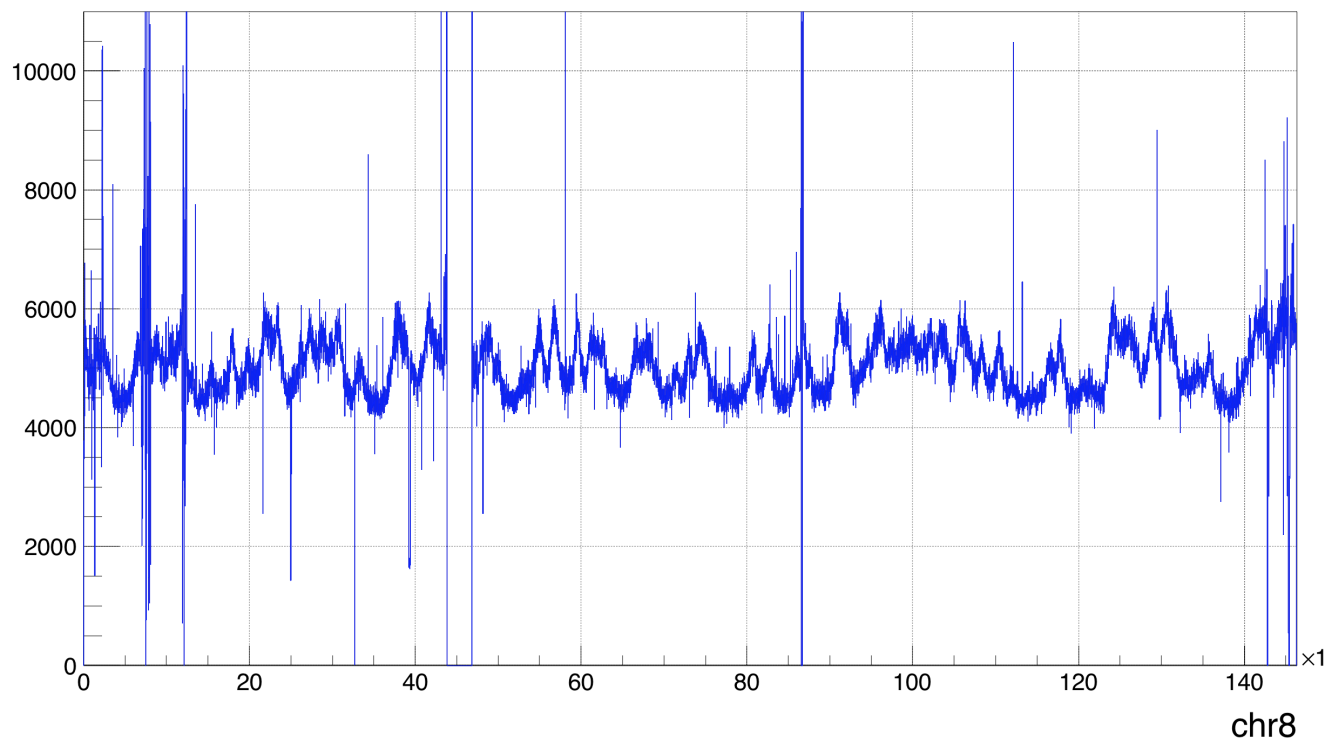

chr8 segmentation for 289361\_WG\_K562vsFemalePool\_2009-03-24\_532 vs. 289361\_WG\_K562vsFemalePool\_2009-03-24\_635 (289361\_WG\_K562vsFemalePool\_2009-03-24\_unavg) - 92 segments

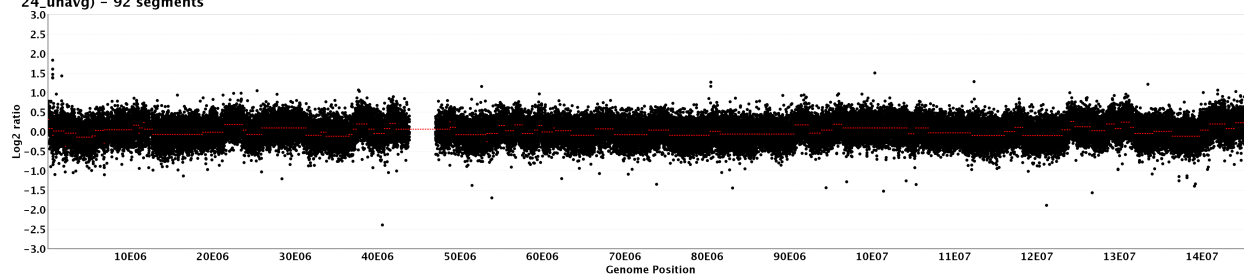

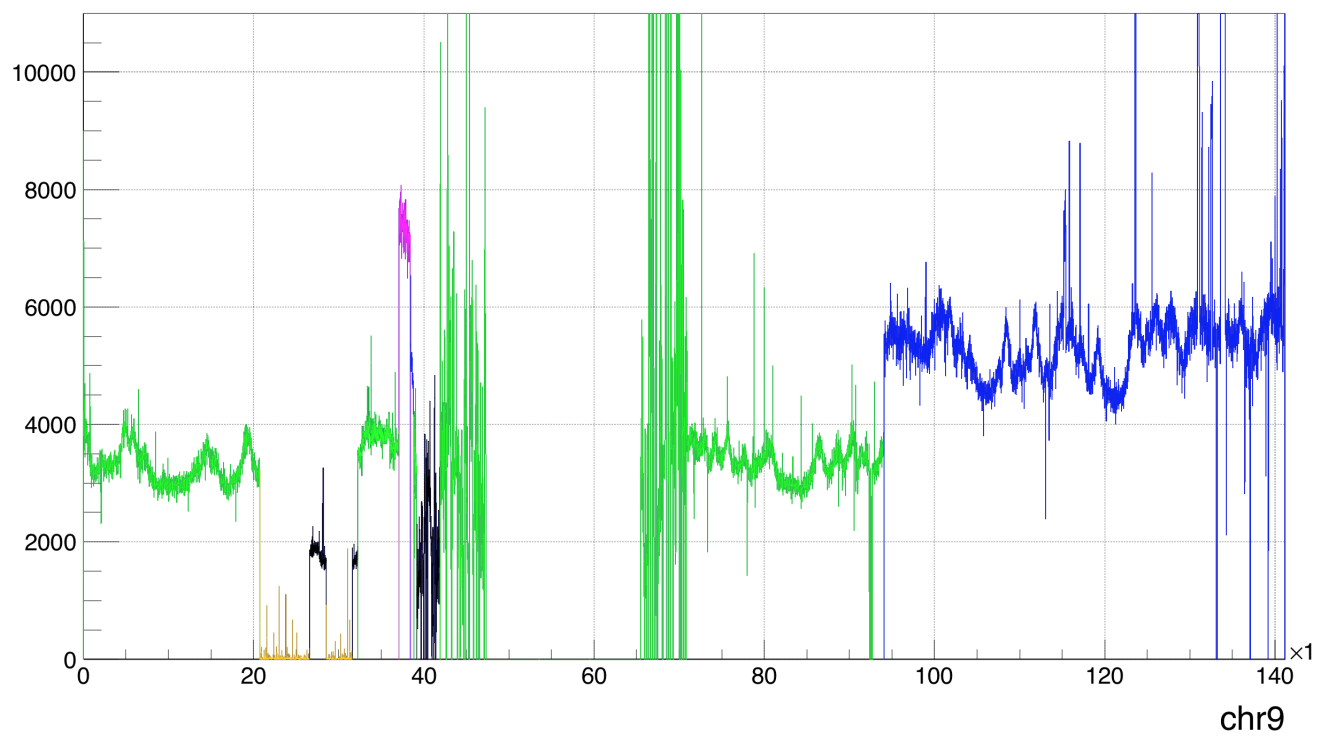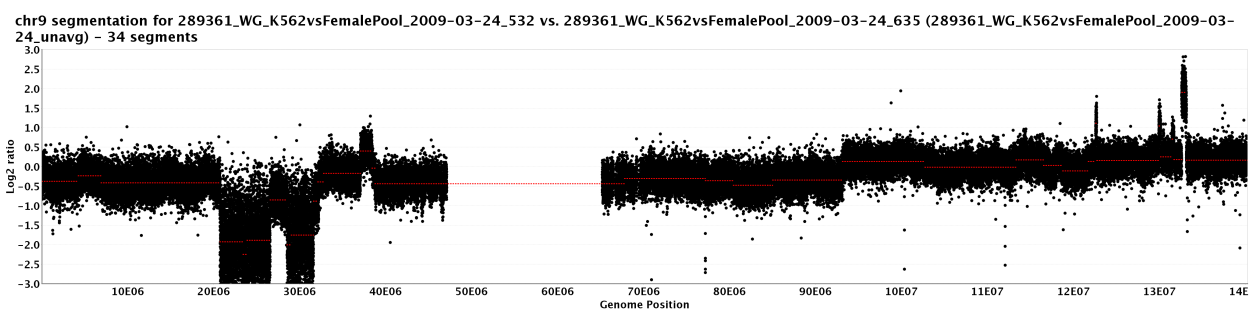

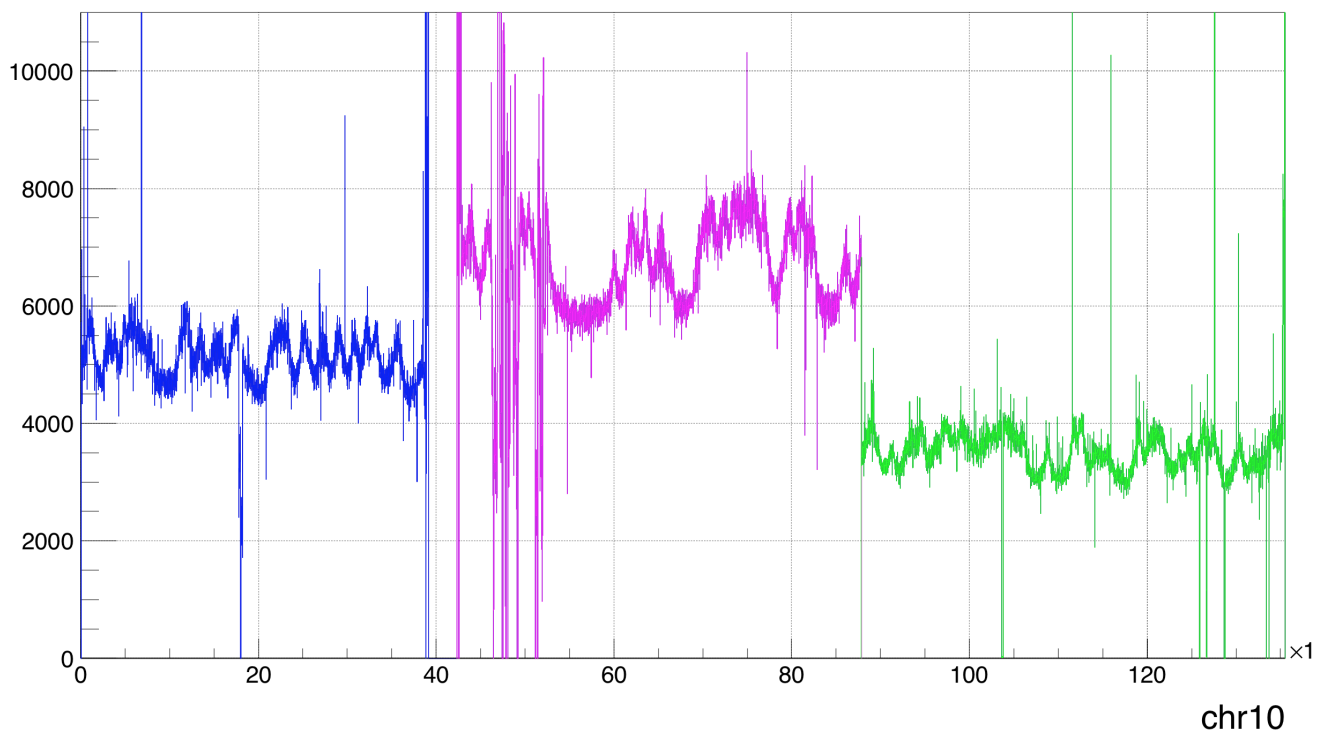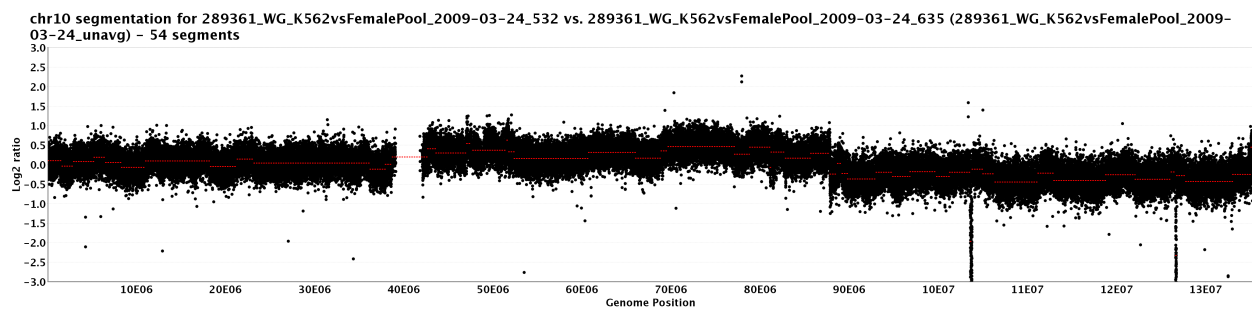

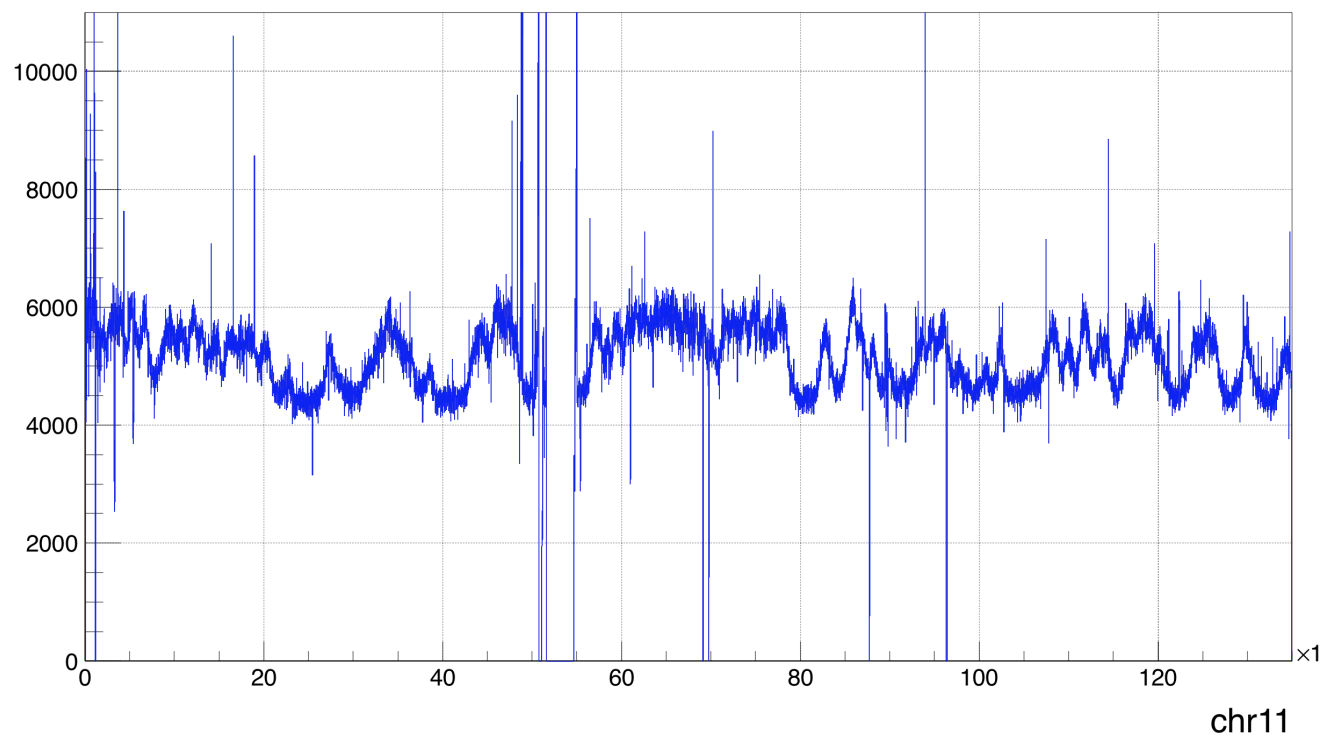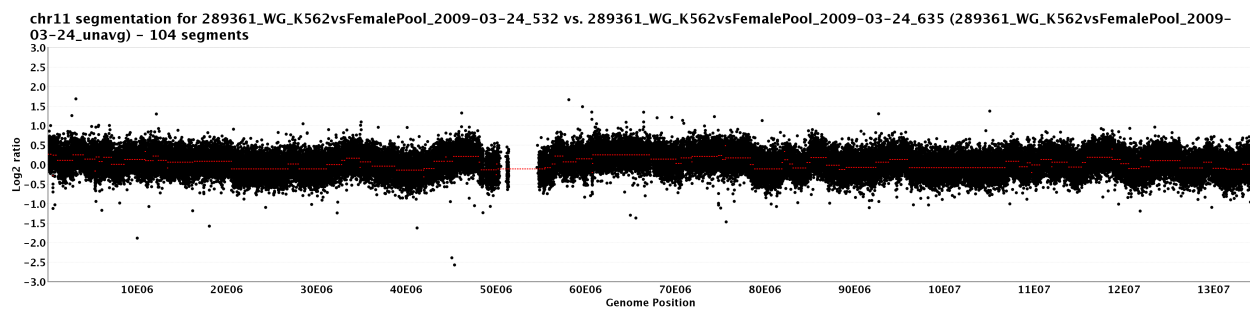

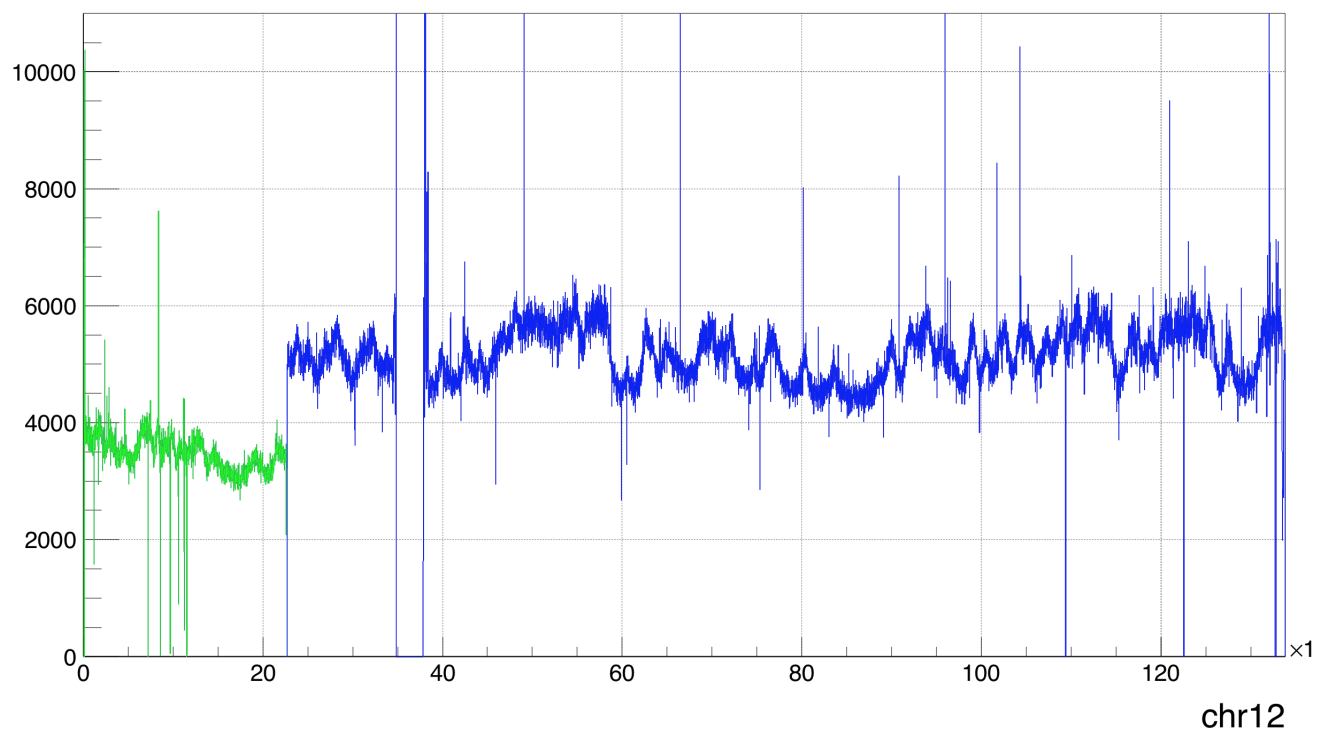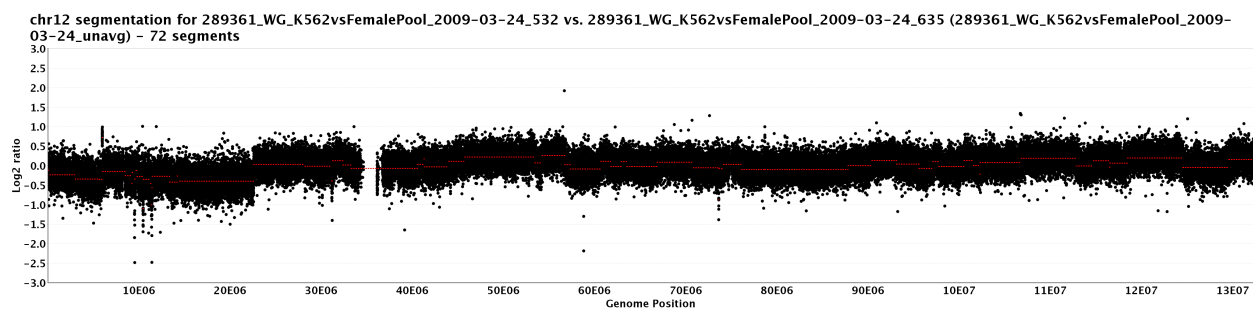



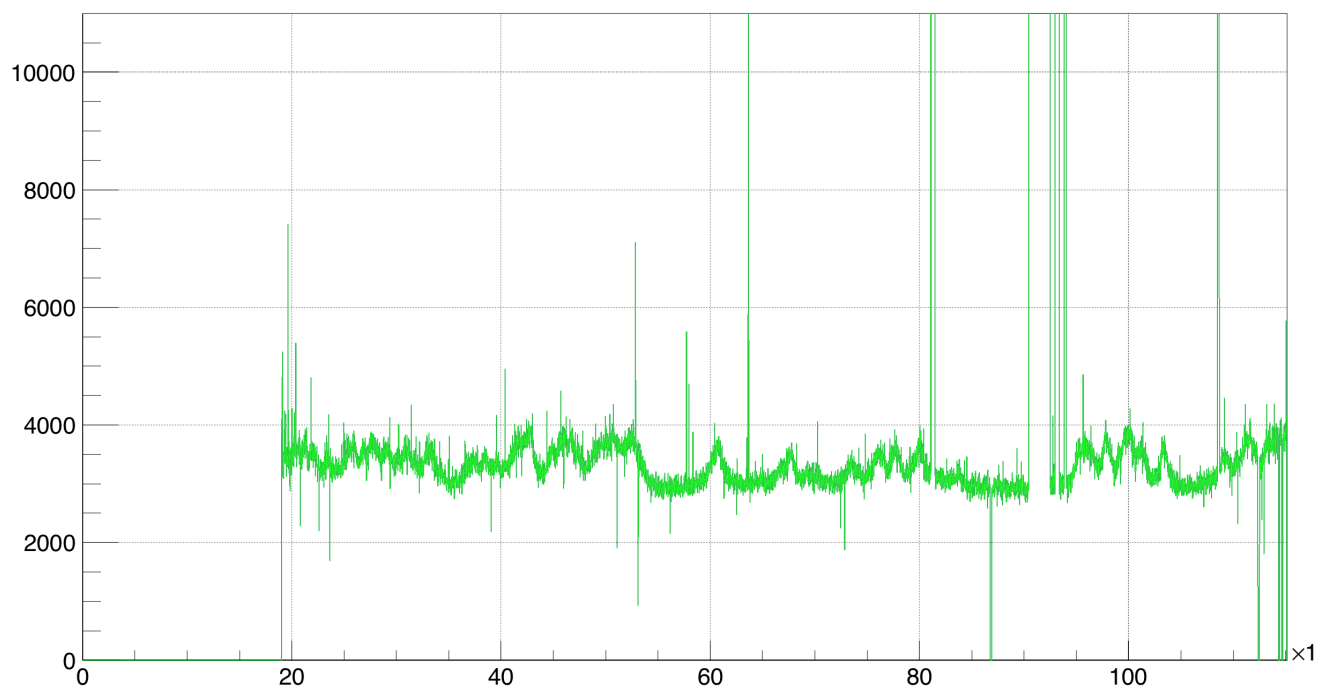

chr13

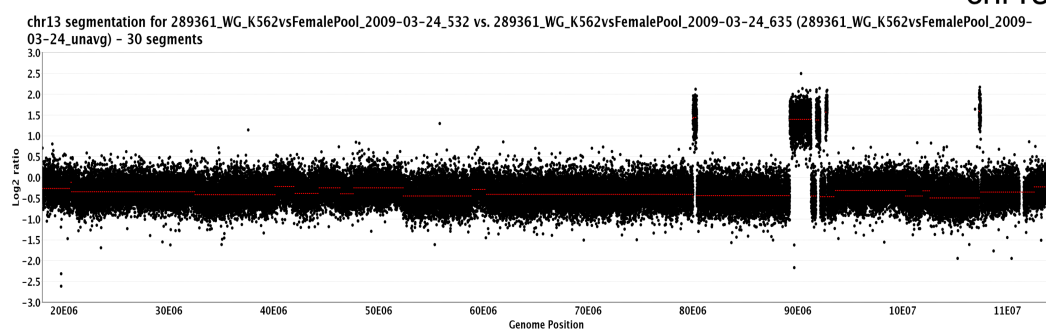

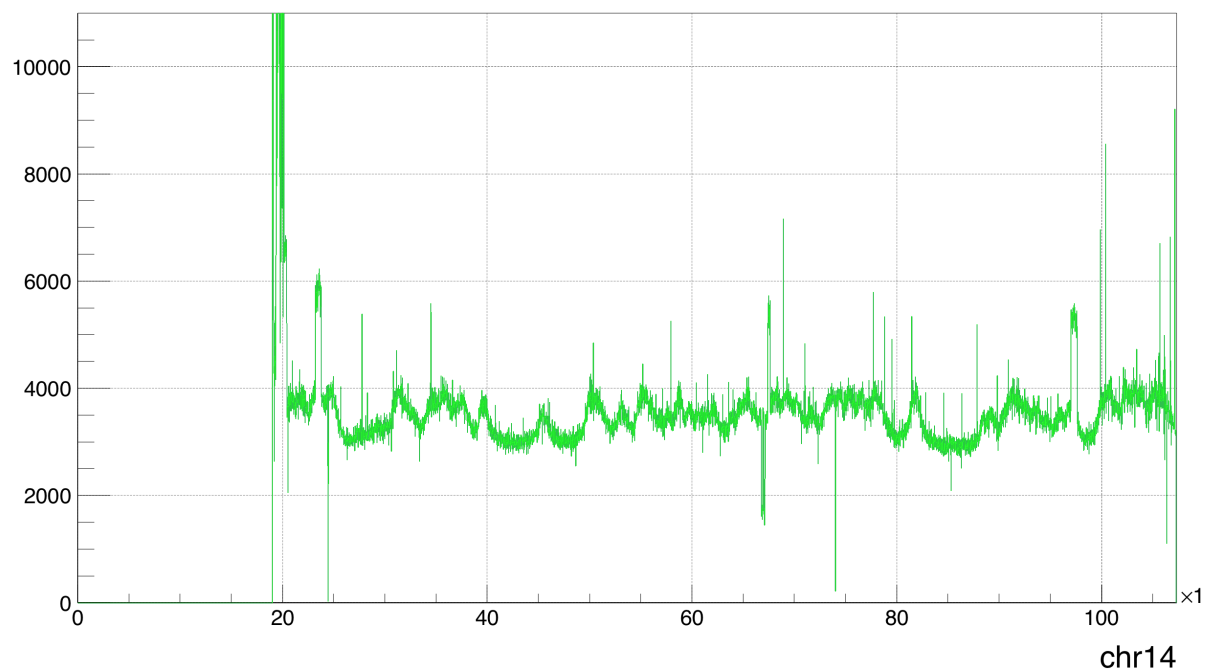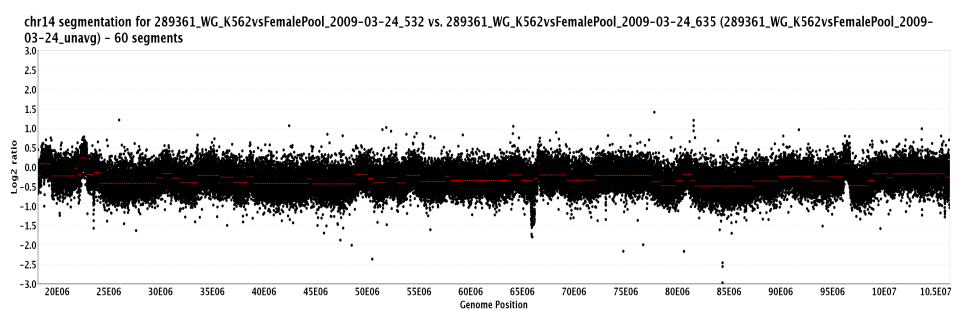

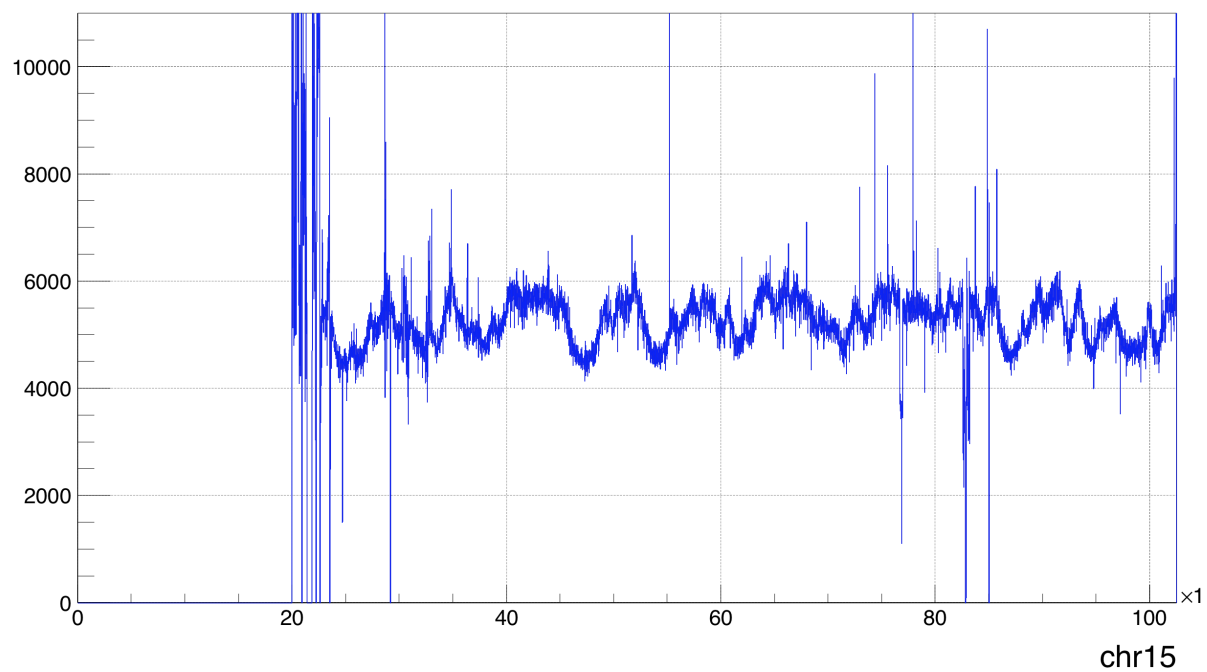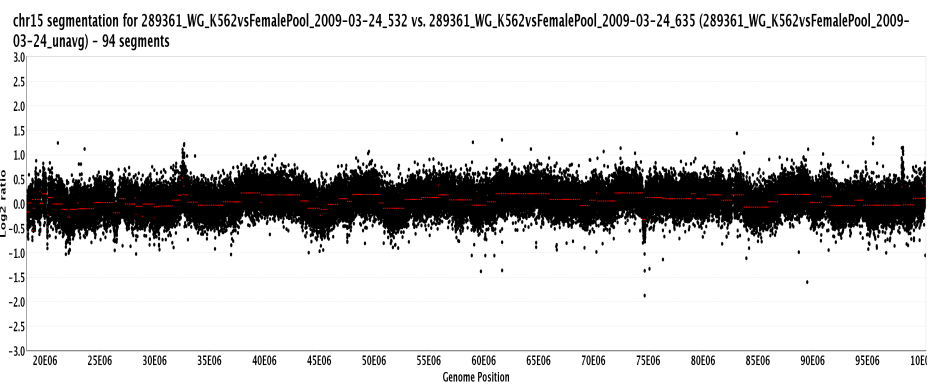

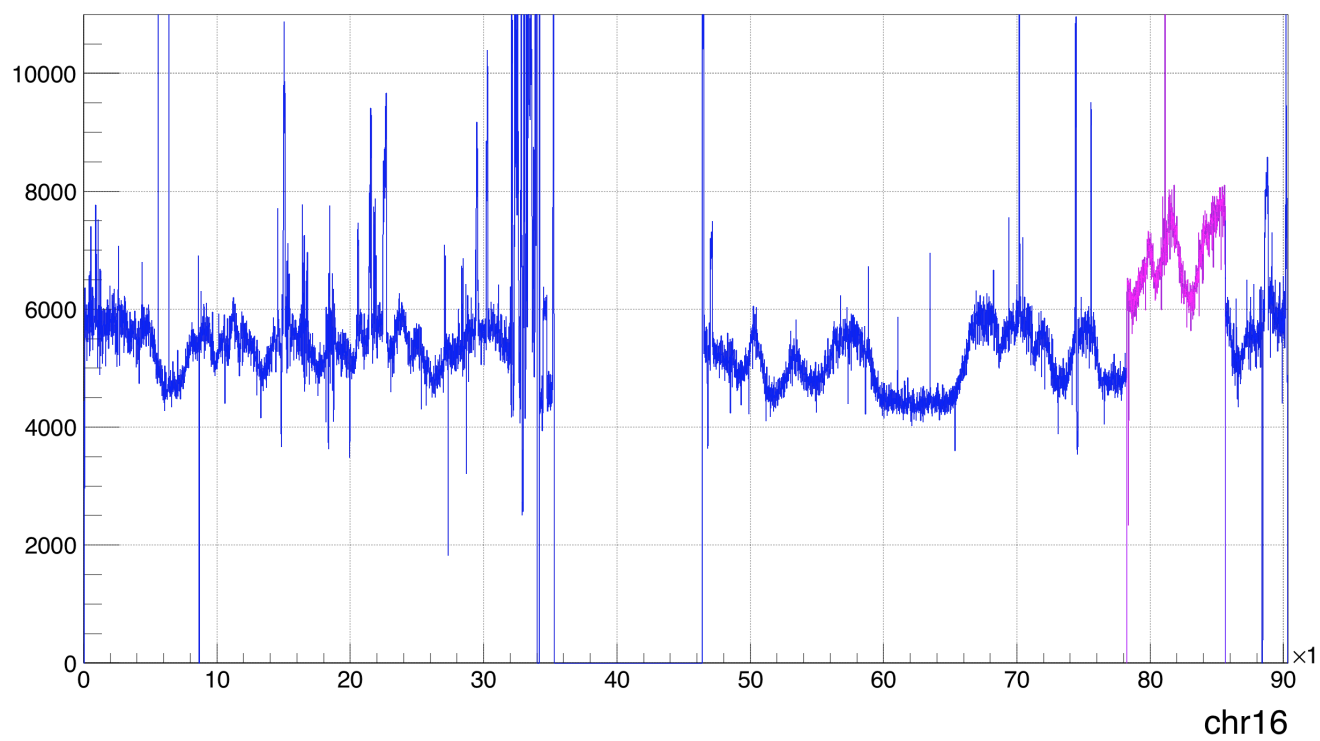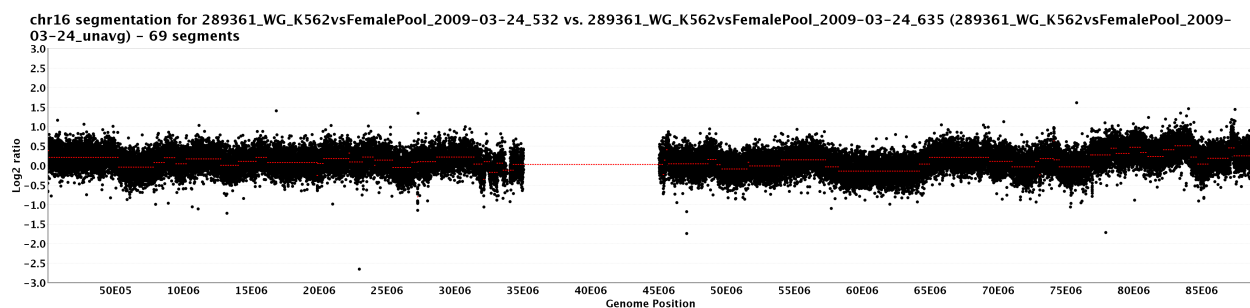

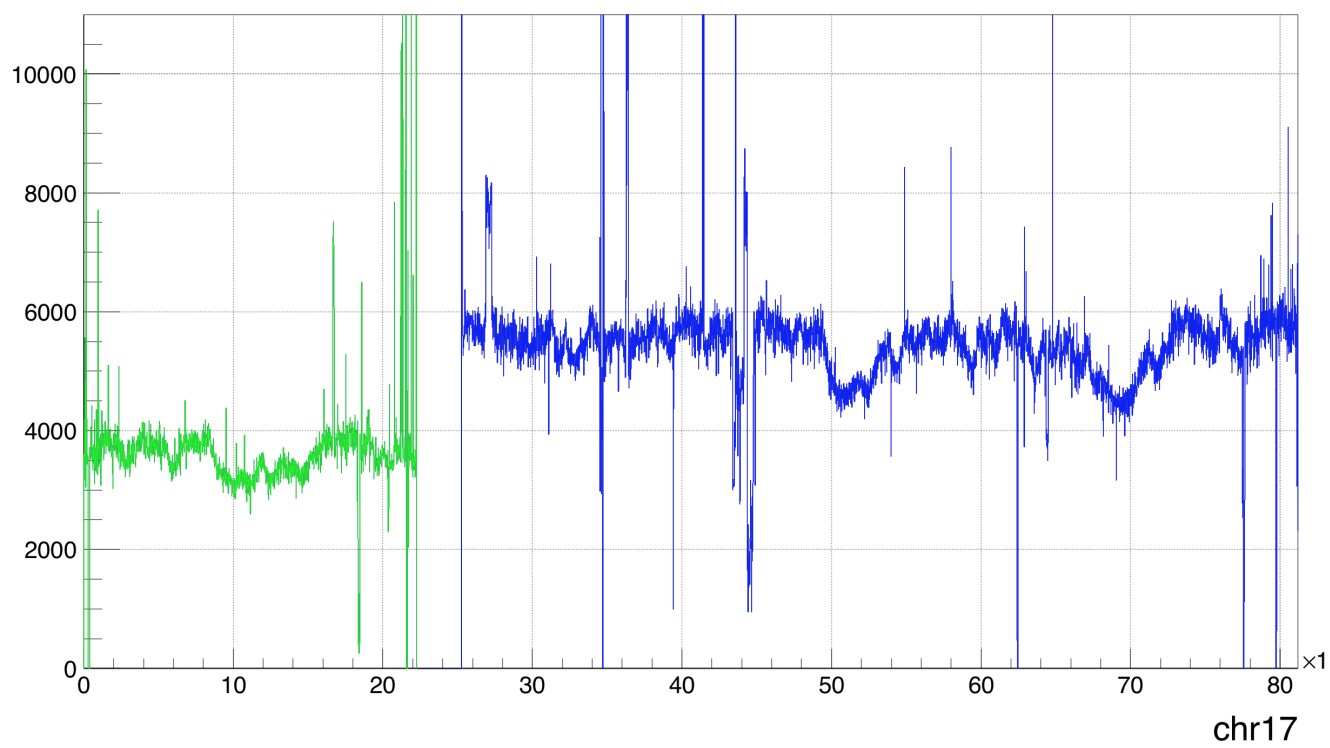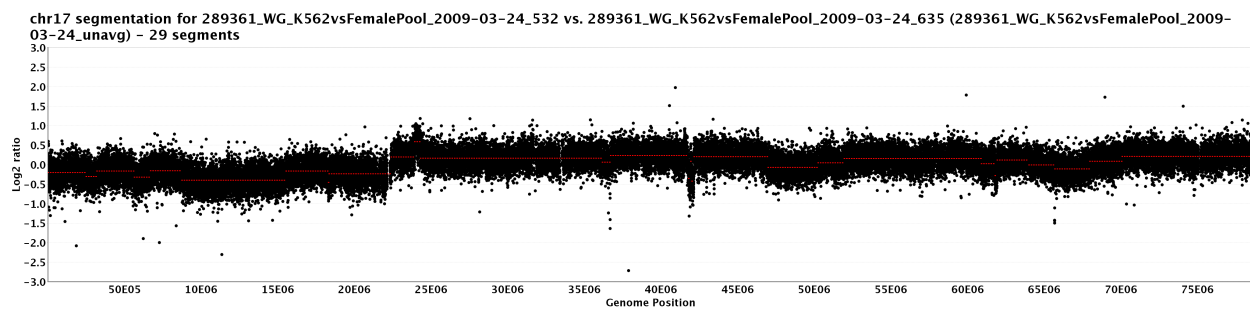

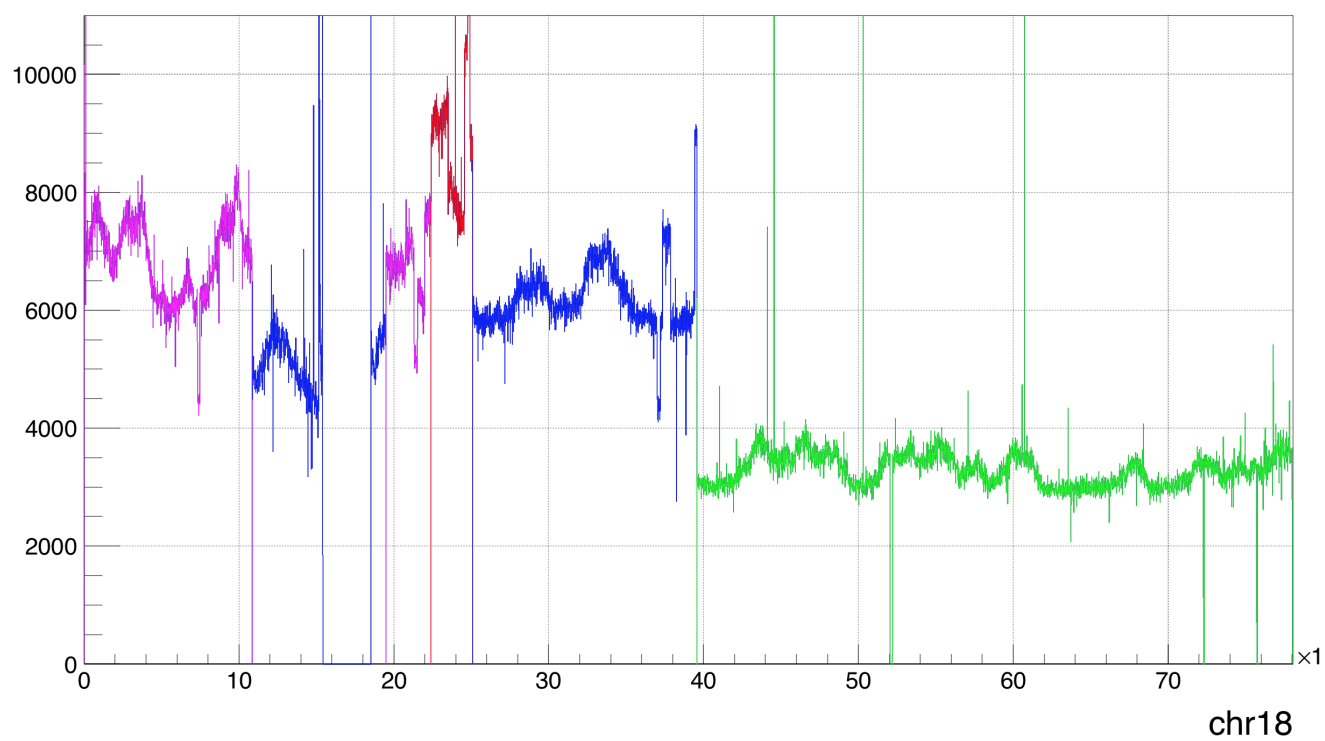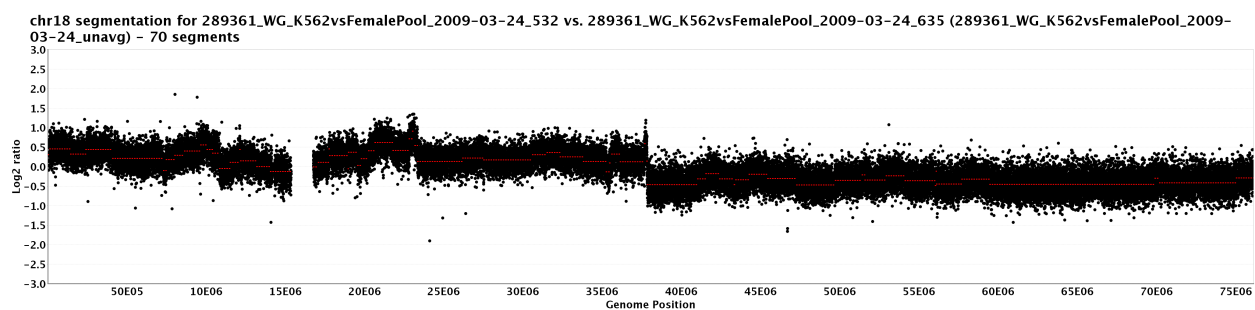

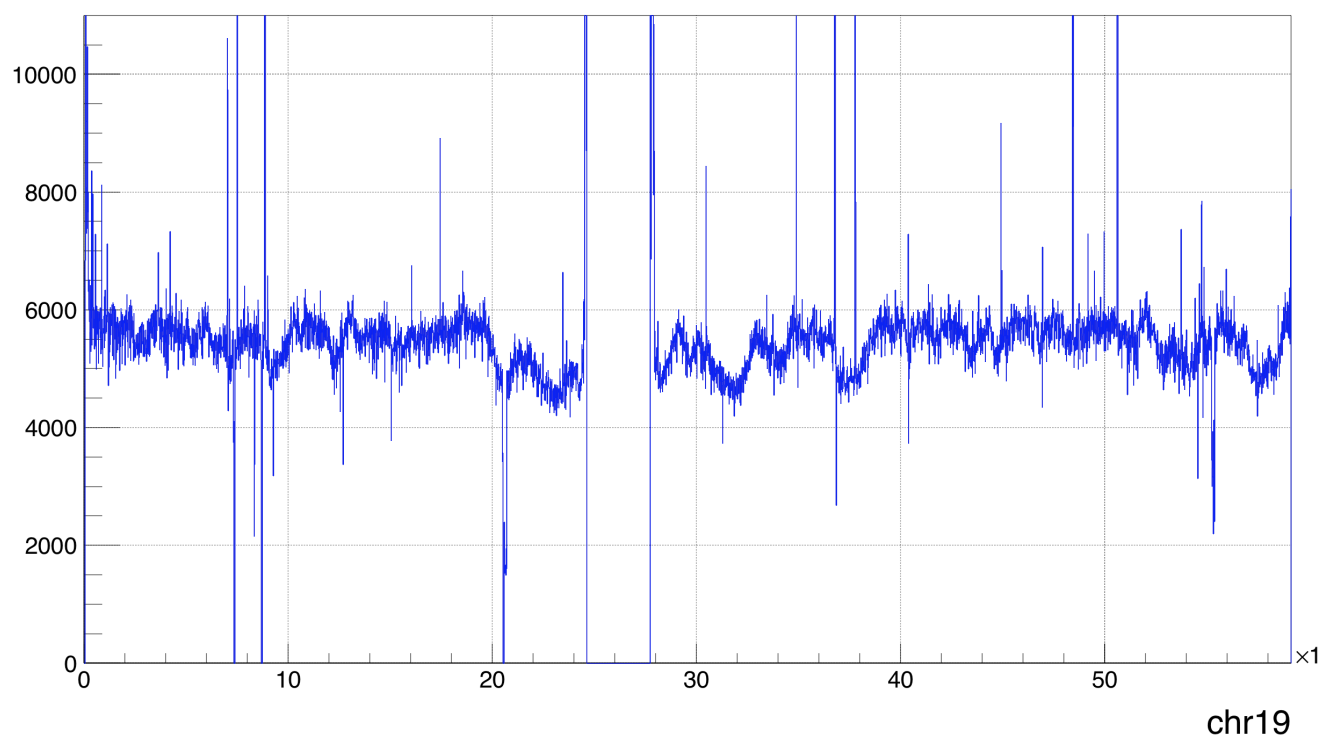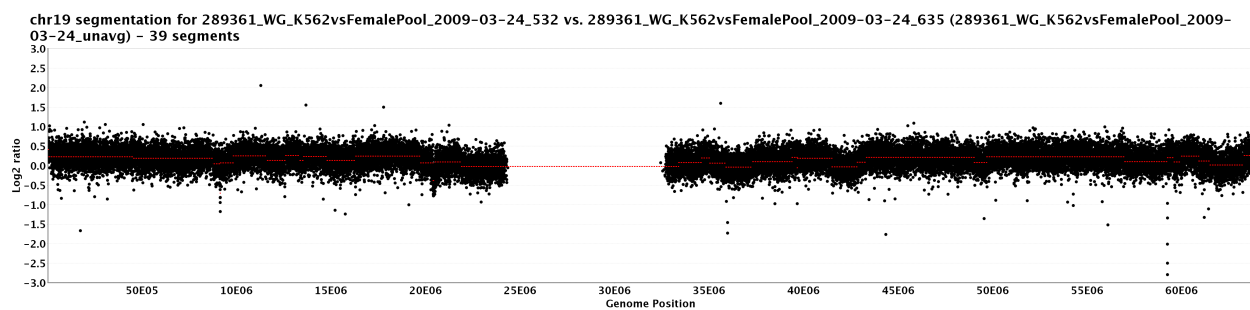

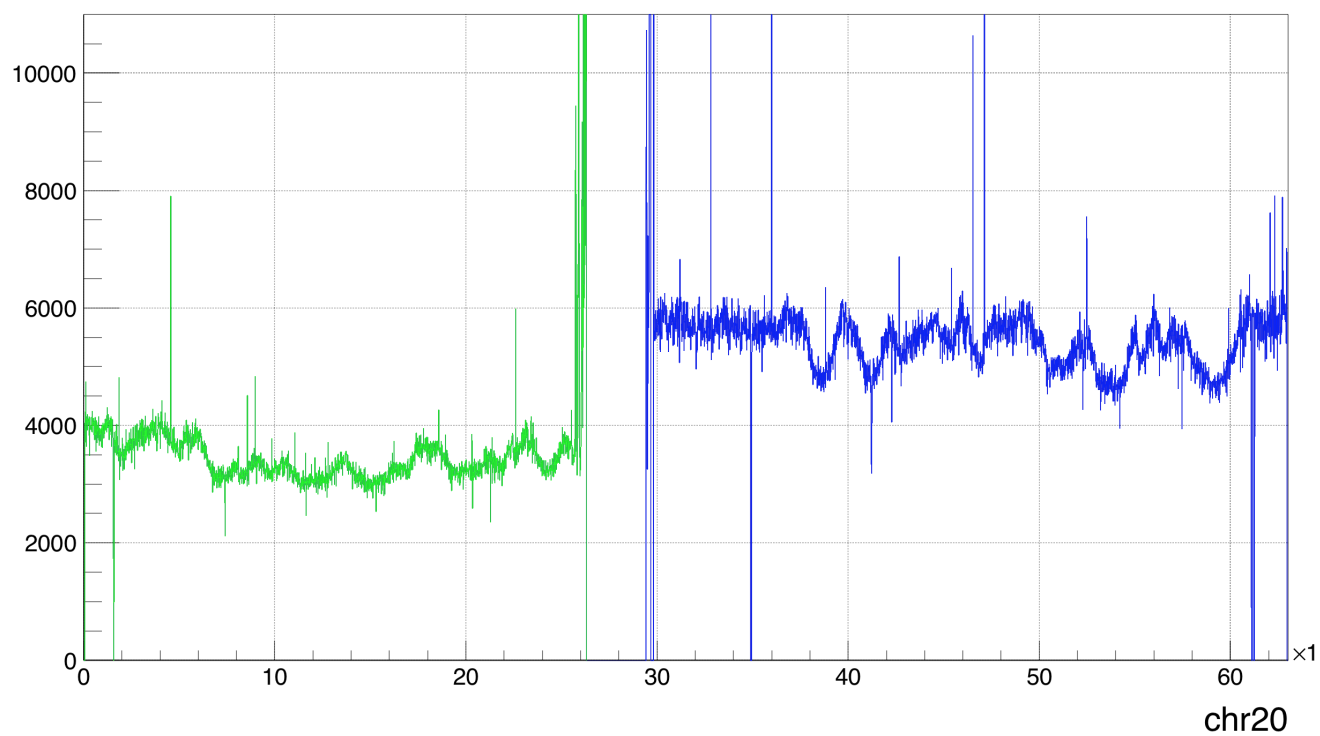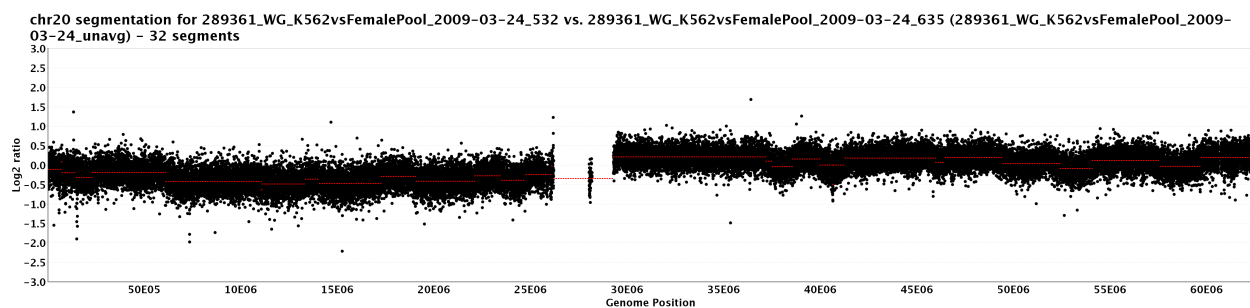



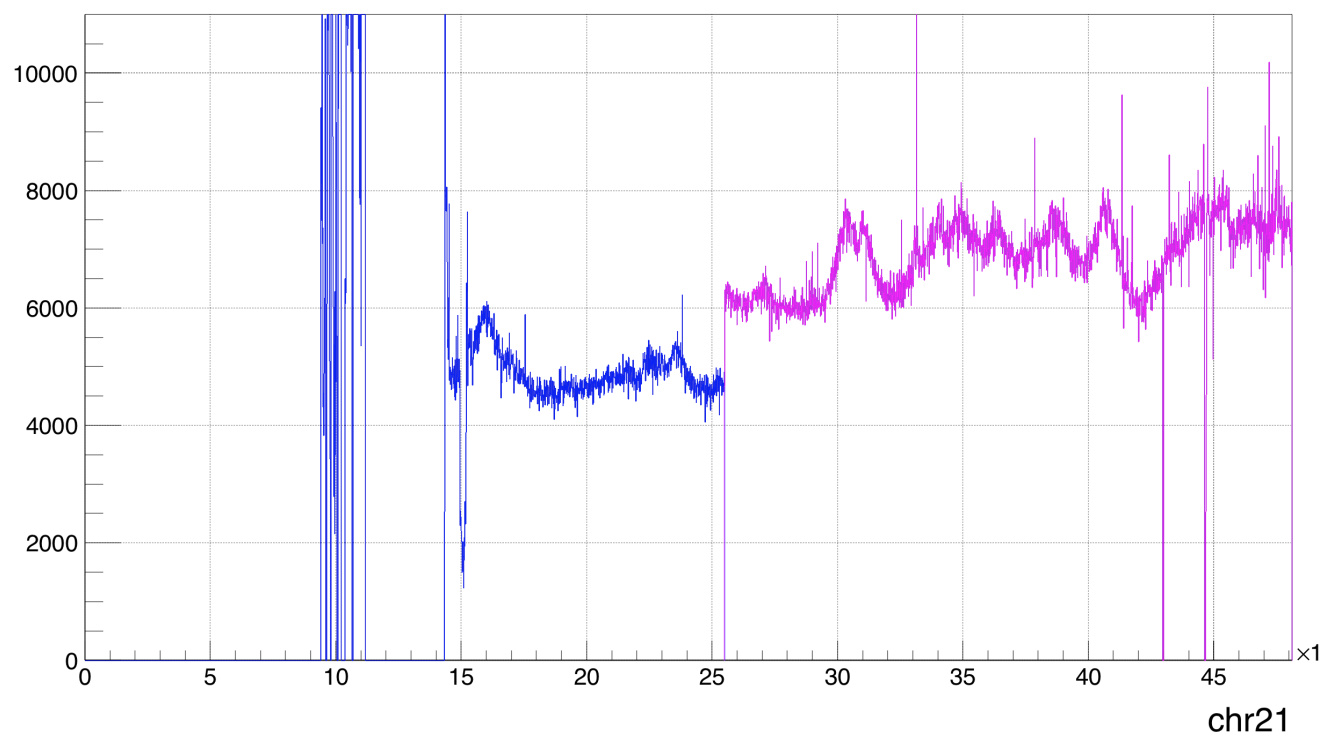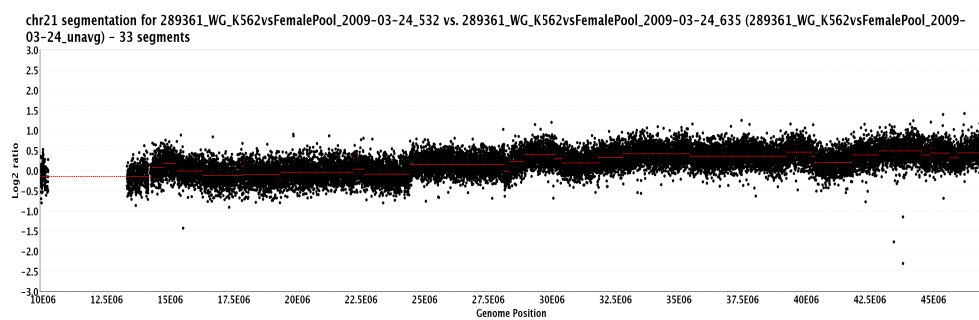

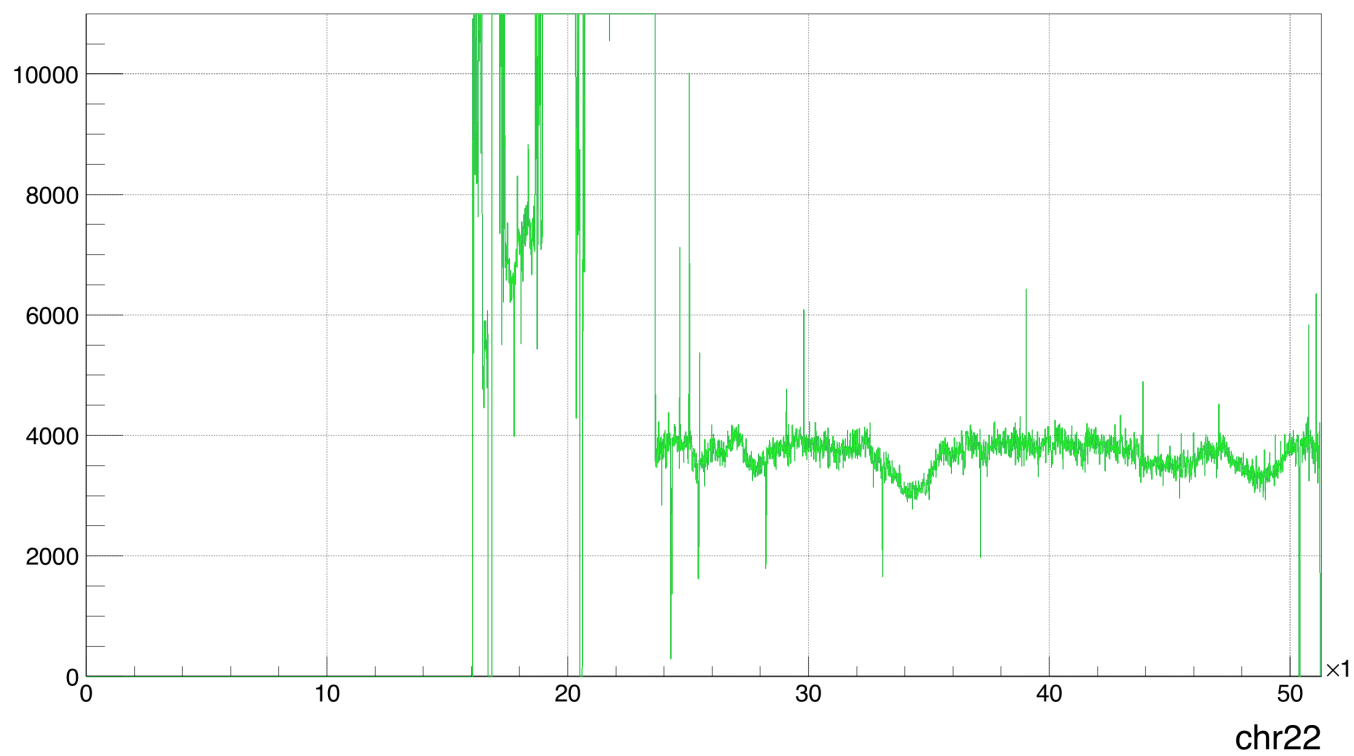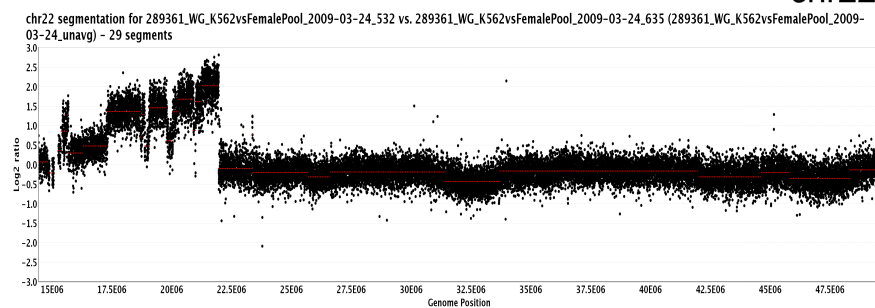

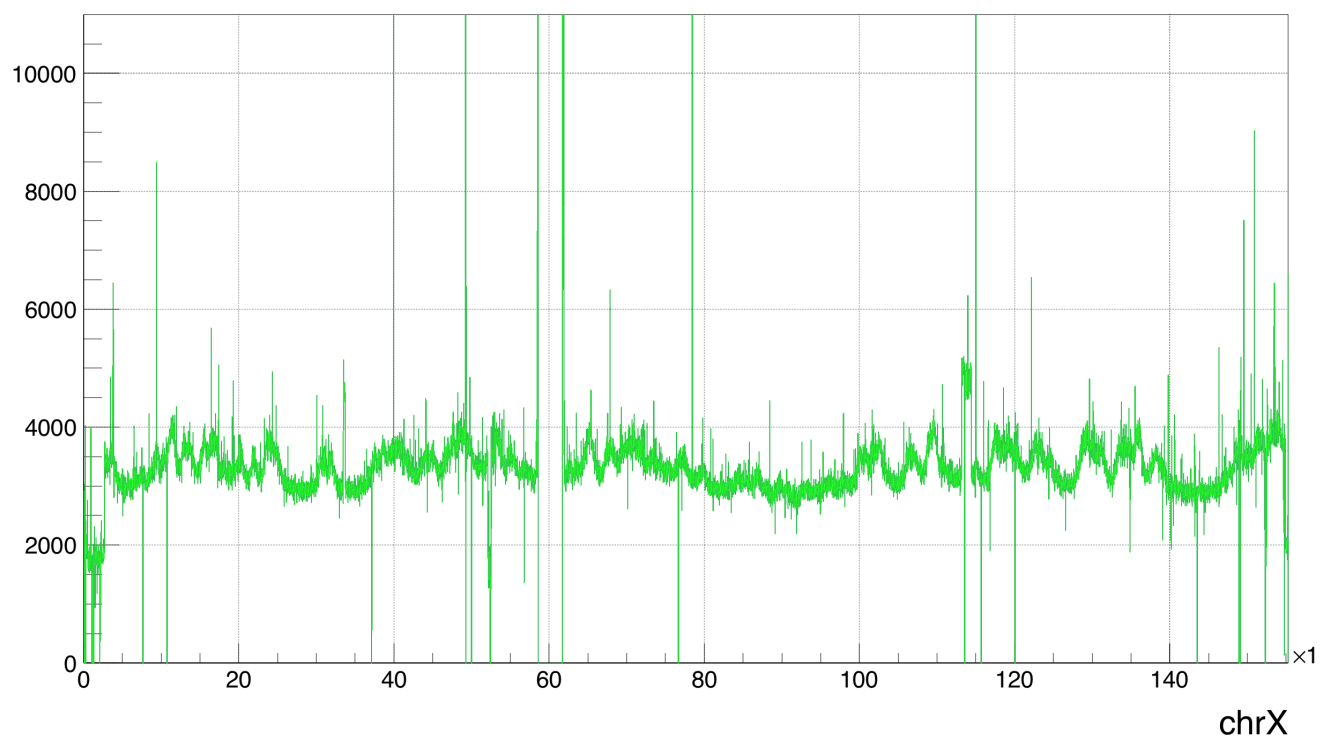

chrX segmentation for 289361\_WG\_K562vsFemalePool\_2009-03-24\_532 vs. 289361\_WG\_K562vsFemalePool\_2009-03-24\_635 (289361\_WG\_K562vsFemalePool\_2009-03-24\_unavg) - 89 segments

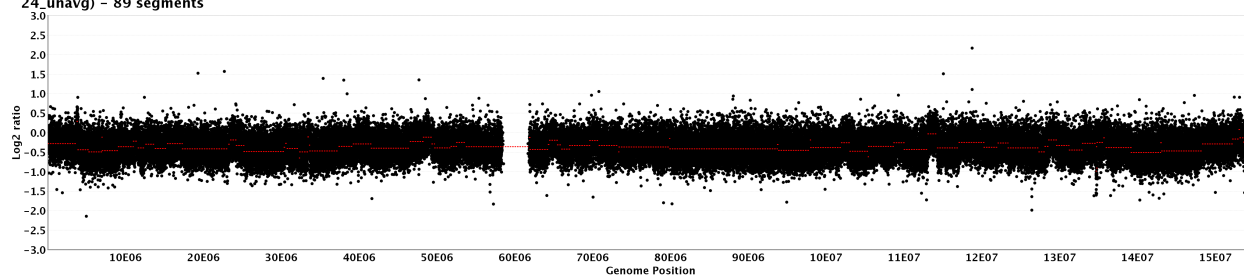

Supplement: Supplemental_Data.zip [file Comparison of CN identified from WGS read-depth anlaysis with NimbleGen aCGH.pdf › Comparison of CN identified from WGS read-depth anlaysis with NimbleGen aCGH.pdf]
