# Supplementary material for: Comprehensive, integrated, and phased whole-genome analysis of the primary ENCODE cell line K562
Source: HighWire-hosted journal article supplement (doi:10.1101/gr.234948.118), 2019-02-08
Supplement: Supplemental_Data.zip [file hg19_K562vsFemalePool_aCGH_segtable_segMNT.xls]

## Sheet: K562vsFemalePool
CHROMOSOME	START	STOP	DATA POINTS	LOG2_RATIO_MEAN
1	4254248	5750974	1207	0.28103
1	5752213	6790438	786	0.46468
1	6791228	8312685	1232	0.34817
1	8314047	12993540	3582	0.45873
1	15031463	17887682	2034	0.4391
1	17888295	18545697	552	0.33833
1	18546975	34503429	12168	0.44873
1	34504622	35944227	1120	0.32784
1	35945764	42367543	5037	0.44937
1	42368793	43385409	778	0.34085
1	43387285	48491862	3825	0.46373
1	48492443	51395352	2119	0.24913
1	51396641	55274417	2964	0.43613
1	55276063	56163256	700	0.10875
1	56164503	65034423	7152	-0.00075
1	65035879	66165426	910	0.18737
1	66166248	68789594	2081	0.07694
1	68791990	70247958	1084	-0.0442
1	70248897	71636902	1037	0.08064
1	71641706	75763568	3173	-0.09053
1	75764478	78937719	2390	0.01745
1	78939060	83647558	3693	-0.13137
1	83654442	91916002	6381	0.04506
1	91917517	94350950	1835	0.14716
1	94352124	96150006	1426	0.0404
1	96150679	100317717	3261	-0.062
1	100318957	100999862	532	0.20808
1	101000793	102267957	965	0.06482
1	102268657	107316223	3672	-0.10768
1	107317140	108575420	1026	0.212
1	108577037	109505649	681	0.43414
1	109508814	110091988	456	0.55583
1	110093003	112690264	2065	0.40942
1	112693366	112704576	7	1.70464
1	112705892	115359531	1952	0.42343
1	115360090	116418218	827	0.29787
1	116419492	118834210	1917	0.40772
1	118835897	120009117	875	0.28516
1	120010312	120525231	405	0.40984
1	148914011	151944879	2026	0.18579
1	151946232	153436649	1127	0.07874
1	153438371	157163362	2644	0.25251
1	157164062	157738733	402	0.11354
1	157739940	159830167	1583	0.00218
1	159831188	162345276	1902	0.21168
1	162346666	163238150	710	0.36473
1	163239170	164726168	1156	0.20997
1	164727291	166978977	1750	0.31808
1	166980708	168412898	1156	0.488
1	168414153	172157535	2824	0.26633
1	172157930	174576686	1711	0.40458
1	174577117	178857949	3389	0.2785
1	178859378	185134668	4966	0.4054
1	185135337	186222164	845	0.2916
1	186223415	187030717	634	0.41328
1	187031111	192410457	4092	0.15611
1	192411772	193706815	1018	0.31593
1	193707715	196710747	2278	0.20414
1	196712175	196916368	153	-0.08739
1	196916892	200505089	2806	0.28023
1	200506514	205918344	4301	0.48108
1	206582672	207236899	549	0.55234
1	207237818	208571086	1088	0.44458
1	208572040	210312800	1416	0.30104
1	210314837	210822536	403	-0.01252
1	210823191	211347534	379	0.28628
1	211348461	213811039	1897	0.44453
1	213812937	219786833	4879	0.22016
1	219787792	220755933	749	0.42508
1	220757460	223237071	1926	0.26739
1	223237714	231816159	6355	0.42191
1	231817076	234158494	1937	0.26175
1	234159449	237180734	2366	0.40033
1	237181933	241474862	3503	0.17114
1	241475764	247936857	4942	0.32518
1	247937566	248744518	551	0.20813
1	248745280	248794732	38	-0.45682
2	12380	3065101	2377	-0.04589
2	3972389	6780445	2158	-0.08393
2	6780996	7516832	626	0.13139
2	7517572	8663700	970	-0.01411
2	8664433	12678409	3161	0.15822
2	12680109	14648268	1516	-0.0318
2	14648826	17460219	2208	0.0875
2	17461142	19535196	1624	-0.04809
2	19536423	21387443	1471	0.07959
2	21388528	22551221	945	-0.08241
2	22552437	24901966	1863	0.06989
2	24904323	28855014	3115	0.18574
2	28856282	33995462	4030	0.07822
2	33996472	36748173	2103	-0.08205
2	36749403	40181032	2681	0.14555
2	40181887	42889188	2154	-0.03058
2	42890255	49274554	5072	0.12081
2	49275787	53873682	3607	-0.09277
2	53875210	56255715	1869	0.16092
2	56256974	60514793	3295	-0.02592
2	60515882	66362221	4377	0.12003
2	66363692	68188698	1436	-0.02564
2	68190470	75084555	5273	0.16396
2	75086113	84921618	7470	-0.06763
2	84922430	86561405	1284	0.19629
2	96528013	97686867	814	0.19413
2	97688376	103481697	4503	0.06535
2	103482078	105801800	1842	-0.0446
2	105803426	106358746	455	0.17685
2	111379032	114168820	2207	0.16821
2	114170357	114327641	107	-0.25804
2	114328121	115026465	507	0.1028
2	115027912	118666607	2666	-0.10509
2	118670578	123609846	3914	0.0633
2	123611248	127242000	2767	-0.1016
2	127243658	129400597	1668	0.12967
2	129402139	130740262	1018	-0.02123
2	130742329	132473800	1105	0.09395
2	132478317	134647486	1540	-0.08546
2	134648523	137202531	1949	0.0688
2	137204131	144611266	5827	-0.05617
2	144612416	145852658	1036	0.11869
2	145853737	149340777	2716	-0.04059
2	150038724	152945540	2272	0.41334
2	152946589	157868854	3660	0.205
2	157869575	161151147	2479	0.33607
2	161151964	166450229	4204	0.16859
2	166451467	169291364	2178	0.27585
2	169291993	173417219	3178	0.43909
2	173418380	178116022	3768	0.33468
2	178117170	179561966	1156	0.45608
2	179563314	188703333	6769	0.23862
2	188704333	193403072	3652	-0.26986
2	193404225	196503581	2269	-0.38323
2	196505262	199145828	1983	-0.23241
2	199146572	201268814	1666	-0.34395
2	201269123	204422820	2267	-0.20461
2	204423882	211194431	5262	-0.31346
2	211196015	215794074	3562	-0.44275
2	215795057	218964788	2580	-0.26745
2	218965366	220533479	1116	-0.13032
2	220534768	230504595	7998	-0.39207
2	230505324	241990095	8770	-0.27772
2	241991222	243088244	758	-0.17084
3	60554	228147	147	0.21654
3	229099	233506	5	-1.96807
3	235182	611660	304	0.19301
3	612873	660522	37	-0.372
3	661567	3032818	1856	0.14137
3	3033497	4277046	963	0.25575
3	4277351	5364780	874	0.50234
3	5366600	5867308	375	0.37646
3	5867946	8537553	2099	0.21142
3	8538710	8983217	340	0.34338
3	8984462	10929868	1483	0.44942
3	10930424	12453132	1191	0.34524
3	12454462	15680533	2371	0.49338
3	15681125	18424490	2129	0.33345
3	18425575	19644535	928	0.22406
3	19645467	20460748	543	0.38028
3	20461426	23745132	2395	0.22003
3	23745848	25003785	1013	0.34269
3	25004540	25049790	35	0.12098
3	25050939	26073337	815	0.2811
3	26074621	30868208	3637	0.18047
3	30868941	32467748	1266	0.30388
3	32468667	34224612	1275	0.40997
3	34225730	36527250	1709	0.22864
3	36528810	48228182	8746	0.42782
3	48229425	53456341	3419	-0.13048
3	53457986	54360030	741	-0.32563
3	54361326	56134350	1459	-0.44327
3	56136038	57351031	937	-0.31449
3	57352522	58836452	1053	-0.18842
3	58841936	59742493	687	-0.33312
3	59743984	60075319	286	-0.98265
3	60076218	60247534	148	-0.31782
3	60249034	60482621	191	-0.10368
3	60483421	60545481	54	0.48551
3	60547009	60752673	166	-0.91853
3	60753631	64761985	3280	-0.42876
3	64769097	71634078	5373	-0.32447
3	71635606	73252101	1309	-0.2052
3	73252568	75394143	1700	-0.43686
3	75395008	75749587	43	-0.0894
3	75759346	75972908	68	0.31295
3	99076219	101884251	2050	-0.23508
3	101885516	106936135	3755	-0.42157
3	106937686	108308920	1122	-0.31911
3	108310027	111754436	2515	-0.42188
3	111757869	113696504	1440	-0.30323
3	113697762	118800078	4053	-0.42808
3	118801133	127700095	6680	-0.26399
3	127701128	129932883	1516	-0.13119
3	129933905	131058866	852	-0.26483
3	131059898	131988587	719	-0.3817
3	131989682	131993050	4	-2.36425
3	131997039	134171598	1657	-0.27761
3	134172841	135319368	916	-0.39929
3	135320102	138277698	2085	-0.28132
3	138278780	139281136	717	0.18922
3	139282082	140505237	978	0.02593
3	140506196	143053050	1896	0.13261
3	143054839	149734537	5091	-0.05988
3	149736445	152787288	2350	0.08659
3	152788126	154967340	1568	-0.02729
3	154972318	157428270	1855	0.13526
3	157431330	160362691	2216	0.00886
3	160363814	160700047	267	0.26273
3	160701282	162510227	1335	-0.0815
3	162513303	162525677	12	0.49586
3	162527112	162543232	9	-0.85443
3	162545705	162625640	57	0.54371
3	162626676	167345276	3310	-0.09892
3	167347186	167934629	459	0.08367
3	167936124	169266207	1088	-0.02657
3	169267672	170123398	633	0.08495
3	170128310	171698260	1243	0.18588
3	171699723	173325575	1250	0.08129
3	173326750	176109555	2177	-0.11838
3	176111293	178624190	1912	0.01177
3	178625933	179473669	609	0.12298
3	179474820	182163391	2054	-0.05572
3	182164488	187334961	3923	0.14954
3	187336190	191063568	3010	-0.11179
3	191064677	191071266	7	-2.18943
3	191072402	192876893	1383	-0.08669
3	192878229	192884373	6	-1.63676
3	192885491	193420719	433	0.03116
3	193421512	197898350	3128	0.18622
4	29861	3546431	2252	0.18824
4	3548212	3606291	26	-0.22935
4	3609570	6392520	1909	0.07557
4	6394104	7298009	682	0.23418
4	9830406	10211202	312	0.24567
4	10211985	10233823	20	2.08739
4	10235231	10391718	131	0.2468
4	10395461	10401443	6	-0.56614
4	10402304	10937728	439	0.05935
4	10938364	15334180	3423	-0.06263
4	15335720	15737851	330	0.06669
4	15739175	19198826	2717	-0.03942
4	19200731	19209203	7	-0.45266
4	19209643	24471545	4222	-0.10796
4	24475162	27489182	2352	0.02595
4	27489862	28582392	851	-0.10414
4	28585030	28813211	185	0.11142
4	28814362	34779010	4608	-0.11974
4	34780245	34826266	33	-1.53928
4	34830384	37436624	1969	-0.11257
4	37438301	38090751	496	0.00398
4	38091720	40677309	1875	0.13855
4	40677927	41497786	649	0.01763
4	41499134	47669695	4614	-0.09383
4	47670579	49037285	1039	0.14793
4	56005792	57665555	1252	0.15265
4	57666544	58273285	430	0.02181
4	58274636	59440221	825	-0.10464
4	59440881	59548785	75	0.13758
4	59550700	64689124	3671	-0.13931
4	64691252	64713620	15	-0.54777
4	64716703	67994162	2407	-0.10398
4	71306536	79347659	5837	0.06484
4	79348806	79843789	407	0.25205
4	79844729	80979444	847	0.09337
4	80980118	81120429	107	0.21703
4	81122232	90161445	6738	0.03843
4	90161900	94758961	3433	-0.11513
4	94759300	95671186	687	0.04822
4	95672397	95681106	8	-0.38536
4	95682051	108578200	9361	-0.04271
4	108578524	111591130	2322	0.06871
4	111592339	112931277	991	-0.06351
4	112932697	113335989	317	0.08884
4	113337331	119284218	4453	-0.09785
4	119285602	119823784	344	0.06113
4	119826220	122381200	1908	-0.07235
4	122382386	124546253	1623	0.09822
4	124546868	127034311	1899	-0.06345
4	127037007	130222874	2265	0.07862
4	130228063	139061777	6482	-0.10726
4	139062817	140942781	1434	0.07857
4	140944199	144153465	2439	-0.05959
4	144154417	145499151	992	0.06556
4	145500552	150521811	3799	-0.06195
4	150522470	155761115	4053	0.0848
4	155765116	157949153	1740	-0.11386
4	157953846	158027532	66	0.17312
4	158028253	158786892	571	-0.13156
4	158787784	160488172	1290	0.05461
4	160493276	163613459	2354	-0.91432
4	163615324	173496289	7387	-0.07016
4	173497625	175330615	1434	0.03397
4	175332062	183725033	6682	-0.11332
4	183726219	186618302	2251	0.06808
4	186619248	188680636	1633	-0.04215
4	188682636	191026128	1624	-0.16446
5	14740	1834445	1162	0.36977
5	1835459	9702794	6282	0.22319
5	9703967	10895846	900	0.48099
5	10896699	31062333	15139	0.16611
5	31063387	44142681	9608	0.30276
5	50397047	52528365	1618	-0.08505
5	52529578	57405742	3697	0.05039
5	57406718	59786066	1857	-0.07952
5	59786686	62263609	1844	0.0915
5	62264134	63884578	1180	-0.04227
5	63885310	81929907	13332	0.07735
5	81930561	89422853	5651	-0.02457
5	89424016	90524598	848	0.15315
5	90527897	94087206	2639	-0.05257
5	94088776	96624014	2001	0.13215
5	96625551	111901789	11198	-0.03372
5	111903065	112581904	539	0.15336
5	112583043	118023418	4092	-0.05061
5	118024425	118812657	573	0.171
5	118813900	130420281	8500	-0.00926
5	130422335	135125321	3539	0.19882
5	135128018	137106936	1541	0.06103
5	137108298	142808585	4261	0.16615
5	142810380	144543504	1327	-0.0478
5	144544513	146176377	1243	0.11684
5	146177476	148337736	1692	-0.05338
5	148339116	151292512	2329	0.20716
5	151294186	153299082	1533	-0.04245
5	153300210	154595894	991	0.16487
5	154596431	156561714	1485	-0.05674
5	156562686	160027874	2731	0.05277
5	160028903	163202743	2385	-0.06035
5	163209791	163982799	623	0.22438
5	163984844	164428853	339	-0.4174
5	164430298	167667810	2656	-0.12925
5	167668925	170784177	2499	0.03661
5	170784681	173799721	2367	0.14163
5	173800325	174976803	929	-0.00837
5	174977849	180374858	3850	0.14249
5	180376713	180429771	42	-1.54944
5	180432252	180891419	226	0.23397
6	60001	299526	140	0.40863
6	301406	2248664	1588	0.28663
6	2250055	3594553	1061	0.47055
6	3595695	8183054	3654	0.34585
6	10540429	16107280	4484	0.36835
6	16108642	16381775	216	0.48608
6	16382903	17278356	712	0.30901
6	17279262	17283122	5	-0.34061
6	17285105	18505096	927	0.36098
6	18506401	20003225	1156	0.21745
6	20003593	21329597	1071	0.34673
6	21330112	25633350	3381	0.20929
6	25634498	26668506	852	0.40903
6	26669583	26724532	44	0.22636
6	26725094	26775809	42	-0.16079
6	26776724	26973673	115	0.1384
6	26974713	29022501	1585	0.42899
6	29023552	29466736	313	0.32528
6	29468201	31331323	1327	0.44429
6	31333837	31618752	194	0.55035
6	31620419	31834063	123	0.9814
6	31836113	31938841	67	0.57608
6	31940925	32013767	45	0.21599
6	32015048	32451421	303	0.47894
6	32452918	32635173	134	0.07371
6	32636251	37818410	3757	0.49158
6	37820256	38106591	238	0.16797
6	38107064	41199887	2538	0.34588
6	41201272	41207943	7	-0.04421
6	41209283	44649978	2545	0.50674
6	44651481	46797445	1697	0.28556
6	46798799	46825453	21	-0.14507
6	46827926	47883004	842	0.33778
6	47884134	48929841	794	0.18972
6	48931516	48939270	8	0.60148
6	48940377	51575861	2012	0.25848
6	51576740	53549119	1543	0.14906
6	53550118	55825377	1768	-0.07994
6	55827190	55846194	17	-1.13776
6	55847853	56502164	518	0.00181
6	56503403	57170144	529	0.12452
6	57171272	57367998	143	-0.04207
6	57369671	57603906	159	-0.30125
6	67898972	70861486	2214	0.01857
6	70862852	70869240	6	-0.17896
6	70870942	71848359	719	0.089
6	71849709	71878087	18	-0.34827
6	71879851	73040209	911	-0.0465
6	73041837	74604141	1153	0.09034
6	74605553	78966661	3053	-0.05548
6	78967935	79035993	49	0.35647
6	79037168	92211469	9593	0.01759
6	92212239	96808054	3393	-0.10409
6	96808822	96818318	8	0.18497
6	96820101	105034445	6229	-0.04874
6	105035338	108434582	2631	0.0648
6	108435925	108446417	9	-0.23078
6	108447733	112467816	3048	0.11828
6	112469344	116123882	2777	-0.06967
6	116124651	118900404	2090	0.04535
6	118901621	120094490	879	0.16972
6	120095555	125046301	3559	-0.06207
6	125053286	126633348	1213	0.18985
6	126634349	127473356	592	0.01135
6	127475653	128799679	1013	-0.08866
6	128801161	128840741	35	-0.50166
6	128841705	129764950	702	-0.0476
6	129766626	130310297	432	0.14753
6	130311039	134168437	2958	-0.00029
6	134169935	135326042	891	0.11062
6	135327960	135627406	233	0.22895
6	135628574	138030149	1852	0.36726
6	138031887	138525083	375	0.51268
6	138526314	146943590	6213	0.25937
6	146944529	147522024	468	0.52679
6	147523138	148003520	372	0.41857
6	148005252	149437303	1133	0.2911
6	149438122	151353768	1477	0.40233
6	151355639	151367719	10	-0.19139
6	151370138	151808357	335	0.32923
6	151809633	156740470	3738	0.22895
6	156741229	157413404	542	0.34795
6	157415177	158989664	1103	0.47083
6	158991755	160783146	1380	0.36254
6	160784341	161406676	421	0.25648
6	161407816	161666223	209	0.76899
6	161668014	162069141	321	0.32251
6	162069874	165723932	2884	0.20747
6	165725198	165730571	6	1.01752
6	165732591	166103947	281	0.15062
6	166105147	170498296	3235	0.28987
6	170499923	171047052	376	0.42962
7	3066622	4927189	1485	0.00629
7	4928411	8524539	2459	0.1526
7	8525968	8825457	239	0.00839
7	8826499	8865981	31	-0.82873
7	8867112	12363922	2550	-0.02163
7	12364981	13246846	647	0.10208
7	13248423	16038521	2102	-0.06764
7	16039278	17027889	763	0.11104
7	17028576	21863597	3690	-0.05024
7	21865081	22588016	590	0.09549
7	22588996	23294091	535	0.19761
7	23296054	28009181	3641	0.08133
7	28010965	29351793	1130	-0.01996
7	29352595	30181890	666	0.08552
7	30183010	31096727	734	0.21048
7	31097882	32254389	915	0.00151
7	32255043	33228524	721	0.16417
7	33230554	36321760	2442	-0.01954
7	36323328	36730577	323	0.31316
7	36731863	37983774	1004	-0.02918
7	37984909	40295295	1796	0.07323
7	40295752	42886885	2101	-0.06569
7	42889350	45448762	1969	0.16881
7	45449327	50004883	3596	-0.05173
7	50006473	51376548	1062	0.06022
7	51378277	54969866	2722	-0.11842
7	54971154	56199293	934	0.07429
7	56199828	57729433	1079	-0.03972
7	57730490	57914096	124	-0.30504
7	63564507	65340970	1207	0.23855
7	65342061	67069790	1325	0.35078
7	67071406	71650352	3771	0.15316
7	76151281	76702055	387	0.16457
7	76702593	78140218	1109	0.27451
7	78142049	86103092	6168	0.14278
7	86104608	86836168	567	0.36618
7	86837854	91280983	3335	0.19278
7	91281501	92619499	1000	0.34718
7	92620306	97865474	3964	0.20395
7	97867724	97912242	36	-0.24405
7	97913432	104612914	5005	0.36218
7	104614422	108346960	2926	0.6032
7	108347629	109428653	798	0.39182
7	109443084	109453518	7	-1.77396
7	109454531	111118800	1292	0.4127
7	111120437	111413009	223	0.78738
7	111414722	115973244	3526	0.40103
7	115974204	117012752	845	0.58645
7	117013810	120084060	2353	0.41119
7	120084854	121203148	912	0.64201
7	121209987	122825957	1269	0.38647
7	122827186	123909714	826	0.48885
7	123910357	126245916	1760	0.36572
7	126247176	127173042	717	0.46797
7	127174895	128077873	764	0.63012
7	128078739	128294732	134	0.41523
7	128300151	130404005	1548	0.61929
7	130404697	143761508	10677	0.51303
7	143766207	147883756	3182	0.37747
7	147884440	150055272	1645	0.55815
7	150055837	151265831	912	0.67419
7	151266824	151900807	501	0.54814
7	151902499	152001641	75	0.06673
7	152002560	158235138	4825	0.50015
7	158236049	159127480	696	0.60768
8	10170	164354	54	0.31151
8	166591	594285	333	0.08208
8	595174	599394	5	1.53366
8	600959	702786	84	-0.09342
8	703653	2139182	1094	0.01416
8	2139908	2160267	19	-0.37864
8	2161842	3512319	1084	-0.03798
8	3513561	5373675	1539	-0.14302
8	5374864	5393794	16	0.02695
8	5394455	5812295	328	-0.11173
8	5815064	6837581	826	0.03494
8	6838453	6874914	32	-0.29373
8	6876441	10378024	2284	0.05
8	10379035	10991095	514	0.1619
8	10991733	11077609	75	-0.03494
8	11079271	11594889	419	0.09366
8	11596387	11712313	88	0.23896
8	12694275	18754904	4713	-0.07113
8	18755551	18760099	5	-0.30695
8	18760995	21411845	2179	-0.01427
8	21413487	23626738	1734	0.17895
8	23628186	24081818	376	0.03988
8	24083154	25922218	1455	-0.07349
8	25923388	31196838	4181	0.09789
8	31197283	33007244	1421	-0.09051
8	33007859	33017319	9	0.16528
8	33018229	33631096	439	-0.01339
8	33632243	36420317	2145	-0.11525
8	36421770	36423681	3	-0.40394
8	36425519	36927874	410	-0.0686
8	36928538	37333331	331	0.06571
8	37334149	38828670	1150	0.19823
8	38830971	39440557	409	0.06421
8	39441358	40716351	958	-0.04525
8	40717977	41356300	479	0.07618
8	41357988	42099089	582	0.21527
8	48596855	48641387	35	0.25328
8	48642212	49358456	474	0.11082
8	49359489	53091458	2762	-0.07486
8	53092990	53107176	14	-0.25447
8	53108892	54543766	1055	-0.04965
8	54544948	55381321	616	0.15459
8	55382045	56472985	859	0.0232
8	56473658	57404389	632	0.17089
8	57405663	58884443	1121	-0.044
8	58886345	58890332	5	-0.26079
8	58891557	59420471	411	0.0407
8	59422480	59779327	282	0.15394
8	59780111	61197937	1058	-0.01047
8	61199326	61419107	151	0.09297
8	61421440	61431376	9	0.28336
8	61431901	63332065	1487	0.02143
8	63333811	66271753	2200	-0.08945
8	66272330	68592852	1694	0.07049
8	68594687	72703153	3056	-0.07365
8	72704050	75241797	1901	0.04245
8	75243273	80178359	3592	-0.09695
8	80181876	81397806	904	0.0073
8	81400390	81407781	8	-0.4811
8	81408992	90631266	6617	-0.06501
8	90633003	92364460	1336	0.17364
8	92365775	93794020	1082	-0.03639
8	93795035	93804047	8	0.19381
8	93804680	95296277	1184	0.03659
8	95296773	96402629	851	0.19155
8	96404180	104316308	6198	0.09109
8	104317926	105216775	641	-0.05062
8	105217891	106728208	1220	0.09565
8	106729046	112058297	4122	-0.02984
8	112058847	112064837	6	0.18221
8	112065742	115973521	2969	-0.10295
8	115975014	117275967	1066	-0.00041
8	117276344	118181713	744	0.10709
8	118183357	122979996	3850	-0.09711
8	122981415	124026470	837	0.0513
8	124027915	124534054	393	0.26019
8	124534877	126572131	1668	0.12661
8	126573513	128368239	1430	0.02403
8	128368897	129431509	894	0.19879
8	129433275	130161210	575	0.08083
8	130162399	131291168	886	0.24376
8	131292420	131848846	461	0.11338
8	131850139	134115918	1850	-0.04246
8	134117216	134127330	10	0.204
8	134128564	136354263	1840	0.00831
8	136355259	139761030	2747	-0.11381
8	139761969	140883363	952	0.04283
8	140883958	142947714	1598	0.19316
8	142948773	144008355	812	0.07786
8	144035727	146294027	1462	0.23165
9	28046	4247121	3310	-0.37531
9	4247947	6907454	1925	-0.23291
9	6908617	20753950	10811	-0.41285
9	20755046	23449473	2001	-1.92867
9	23450916	23886211	363	-2.24886
9	23886884	26583763	1988	-1.88845
9	26585805	28551248	1510	-0.852
9	28552385	29022386	367	-2.00295
9	29022787	31619572	1925	-1.75429
9	31621899	32106858	331	-0.88396
9	32107943	32797367	494	-0.39146
9	32797855	37094261	3229	-0.17415
9	37095036	38427923	1098	0.40221
9	38430483	38772235	261	-0.03746
9	68319211	78003354	6380	-0.30245
9	78005184	78011557	7	-2.39856
9	78012706	81246539	2537	-0.35944
9	81247403	85835743	3597	-0.47947
9	85837077	94084192	6274	-0.3434
9	94085022	103690964	7512	0.13034
9	103692359	114288627	8231	-0.01737
9	114289680	117467190	2553	0.17109
9	117468478	119707215	1835	0.03349
9	119707774	122707636	2496	-0.10595
9	122708954	123552987	698	0.13529
9	123553786	123669961	95	1.11591
9	123670693	130907965	5736	0.15935
9	130908784	131107235	129	1.04224
9	131109311	132430456	927	0.24967
9	132431881	132660580	180	0.70781
9	133607941	134155239	429	1.90286
9	134156720	141131132	5221	0.16786
10	60110	1633222	1205	0.0992
10	1633990	2943496	1105	-0.04015
10	2945035	5245237	1905	0.08185
10	5245980	6505357	985	0.19109
10	6507644	8263379	1442	0.05553
10	8263854	10983180	2248	-0.068
10	10984843	18240745	5757	0.09508
10	18242018	21273593	2386	-0.04485
10	21275244	23140635	1406	0.14151
10	23141870	36179830	10179	0.03782
10	36180547	37878733	1308	-0.11663
10	37879971	38685704	595	0.0102
10	43369554	44295524	685	0.4097
10	51912763	52117289	161	0.62824
10	52118665	52726770	492	0.32834
10	52727407	61079584	6448	0.16149
10	61080931	66334880	4181	0.3108
10	66335307	69190956	2147	0.16447
10	69191589	69989004	545	0.35158
10	69990290	77437345	5574	0.46669
10	77438194	79137306	1399	0.27103
10	79138325	81457226	1901	0.44697
10	81459929	81553878	63	-0.07078
10	82827962	85672179	2185	0.16581
10	85673283	87848666	1650	0.28779
10	87849388	88668802	640	-0.23932
10	88669751	89188976	364	0.03591
10	89190149	89824375	490	-0.22945
10	89825539	93011706	2487	-0.36383
10	93012878	94864679	1367	-0.19779
10	94866456	96832057	1420	-0.30376
10	96836659	99783790	2275	-0.17935
10	99785267	101273004	1094	-0.30424
10	101274066	103602275	1784	-0.19835
10	103604343	103792683	144	-1.96551
10	103793908	104998515	870	-0.11541
10	105000074	106361449	1094	-0.23397
10	106362774	111170933	3759	-0.44623
10	111172460	112978355	1412	-0.22214
10	112978951	118763171	4668	-0.41026
10	118763767	122098245	2687	-0.25566
10	122099491	126117019	3288	-0.376
10	126118302	126638414	399	-0.18408
10	126641987	126730267	77	-2.32479
10	126730813	127759956	798	-0.28345
10	127760753	133127139	4342	-0.42899
10	133128246	135241026	1529	-0.25069
10	135242151	135393386	107	0.44429
10	135400323	135520883	56	-0.16772
11	60224	624689	306	0.26708
11	625782	641893	11	-0.2774
11	643425	1125070	324	0.24601
11	1126120	2880523	1248	0.11207
11	2882035	2891620	9	-0.2531
11	2892308	4224166	859	0.25426
11	4225040	5333598	820	0.14065
11	5336019	5469325	98	-0.16131
11	5469882	5819778	280	0.19582
11	5821242	6337305	359	0.08097
11	6338113	7167054	641	0.19244
11	7167982	8652516	1145	0.00655
11	8653214	10945831	1717	0.13456
11	10946889	10979325	21	0.34161
11	10979617	11815510	691	0.09964
11	11816421	12395351	466	0.219
11	12396424	13412719	853	0.11369
11	13413881	13448968	24	-0.0815
11	13450262	16432743	2303	0.06343
11	16434303	16457892	19	-0.09701
11	16459122	20558109	3133	0.09038
11	20559481	26860286	4675	-0.11165
11	26861588	28091106	954	0.01552
11	28092775	31169616	2386	-0.10621
11	31173259	32842474	1310	0.00202
11	32843972	33394437	409	0.11029
11	33395837	33406760	10	-0.21829
11	33409276	34890646	1201	0.16736
11	34892406	34910360	16	-0.06638
11	34911712	36231552	1090	0.0698
11	36232658	38957857	2061	-0.03542
11	38959781	41999887	2282	-0.14256
11	42001928	42019891	17	-0.30978
11	42020641	43147521	844	-0.10211
11	43149606	44447830	1048	0.08878
11	44449645	44610481	130	0.19324
11	44611119	45317671	586	0.08711
11	45319309	48165235	2165	0.20933
11	48166483	48418506	148	0.06454
11	48419753	50086015	1004	-0.13157
11	50086822	50120804	24	-0.25472
11	50121653	50279946	110	0.0127
11	55695009	55715874	19	-0.26776
11	55717473	56517119	567	-0.0811
11	56518883	56820407	214	0.01895
11	56821614	57740598	705	0.22061
11	57741512	59240693	1075	0.0683
11	59241788	59245025	4	-0.15044
11	59245768	60966265	1293	0.14623
11	60967727	61018324	39	-0.20249
11	61020112	61043461	18	0.02977
11	61044035	67519381	4437	0.25069
11	67521328	70403285	1980	0.14112
11	70404101	70972489	460	0.03451
11	70973195	72171427	744	0.1722
11	72171819	72202089	28	0.06757
11	72204447	75138218	2202	0.21482
11	75139616	75142825	4	-0.79352
11	75143829	75601250	364	0.23695
11	75601757	75906204	250	0.13408
11	75907110	75911568	5	0.48631
11	75912835	78690697	2099	0.1745
11	78691847	79169779	397	-0.00287
11	79170172	82194834	2381	-0.10581
11	82195323	82494267	230	0.05308
11	82494792	82509272	13	0.33689
11	82510954	83067162	412	0.12421
11	83068200	83428856	276	0.01716
11	83430143	84999494	1259	-0.08702
11	85000662	85419751	257	0.05866
11	85421269	87155170	1320	0.18029
11	87156314	88624008	1050	-0.01202
11	88624663	89401888	615	-0.12505
11	89403121	89406776	4	-0.41456
11	89407683	92706711	2514	-0.06679
11	92708362	94282241	1130	0.06697
11	94283263	94285290	3	0.41277
11	94286742	96577308	1708	0.13556
11	96578544	107358234	8090	-0.07541
11	107359131	108857078	1119	0.08938
11	108857535	109724012	608	-0.05108
11	109727168	110214048	371	0.04916
11	110215638	110219920	4	-0.20499
11	110220503	111245772	787	-0.00875
11	111246786	112457086	961	0.13306
11	112457853	112463435	6	-0.05166
11	112464167	114330968	1539	0.06326
11	114331609	115859844	1226	-0.06185
11	115860945	116412383	458	0.05782
11	116413729	119167682	2107	0.18716
11	119168082	119189679	19	0.39675
11	119190545	120146184	782	0.13264
11	120147421	121029005	739	0.02727
11	121029967	122332154	1034	-0.10435
11	122332910	122431075	55	0.16504
11	122432675	123451852	820	-0.05125
11	123452847	126746861	2581	0.10165
11	126747319	129404605	2124	-0.08904
11	129405523	130432389	783	0.06648
11	130434063	131924717	1236	-0.08988
11	131925092	131930200	5	-0.67191
11	131931455	133729765	1492	-0.11924
11	133730745	134944701	988	0.01059
12	147085	371712	174	-0.11634
12	373167	3136040	2188	-0.23067
12	3137506	5771691	2182	-0.34586
12	5773156	5786667	12	0.03195
12	5787759	6110704	265	-0.3496
12	6111907	6114389	3	0.73939
12	6114873	6117583	3	-0.12615
12	6118801	6134512	15	0.72071
12	6136192	8603900	1512	-0.14548
12	8604317	9349137	528	-0.25824
12	9349594	9361875	11	-0.45616
12	9363175	9635326	204	-0.16949
12	9636535	9640394	4	-1.42573
12	9641270	9798301	109	-0.34017
12	9799396	9907492	82	-0.12074
12	9908286	10568076	463	-0.28136
12	10569623	10595946	22	-1.09299
12	10596698	11368753	572	-0.35546
12	11369463	11503458	83	-0.45731
12	11504649	11551027	35	-1.00092
12	11552699	11586241	26	-0.55965
12	11587964	13471876	1520	-0.27002
12	13473062	14311694	680	-0.42074
12	14312169	14573061	166	-0.2633
12	14573845	22710275	6104	-0.40246
12	22712393	28327092	4449	0.02876
12	28328554	28337429	8	0.32124
12	28338335	31264624	2244	-0.01311
12	31265843	31353712	64	-0.38845
12	31354483	32509786	791	0.12653
12	32510776	33379794	628	0.01681
12	33386969	33392503	6	0.36654
12	42305444	43000725	527	0.03497
12	43002235	43028195	23	0.17315
12	43029670	45708704	2042	-0.03226
12	45709532	47465335	1258	0.11411
12	47466967	55146711	5585	0.21735
12	55149925	55950078	522	0.06966
12	55951238	58435885	1679	0.26318
12	58437375	59049068	476	0.02494
12	59051033	62395907	2393	-0.08431
12	62396913	63502680	872	0.11134
12	63503730	64619013	827	-0.02274
12	64622716	65267797	470	0.10267
12	65268975	68562331	2618	-0.02333
12	68563578	72553771	3079	0.08413
12	72554823	75333388	1983	-0.05581
12	75334767	75345697	9	-0.88056
12	75346484	75839756	379	-0.07832
12	77576463	80152385	2008	-0.09928
12	80155784	80162365	7	0.67806
12	80163498	89299138	6711	-0.10251
12	89300082	91897073	2067	0.00433
12	91897838	94603670	2139	0.13761
12	94604167	97084896	1890	0.03726
12	97085597	98569647	1189	-0.06998
12	98570769	99245166	520	0.10106
12	99246269	102039513	2058	-0.0247
12	102040740	103012286	749	0.13565
12	103013517	103720172	551	0.00393
12	103721013	103754073	29	-0.21522
12	103762005	108290751	3596	0.08223
12	108291583	114357472	4578	0.18765
12	114358853	116252846	1579	-0.00347
12	116254560	118020801	1449	0.12803
12	118022322	118050469	26	-0.03887
12	118051078	119990483	1521	0.0641
12	119991691	125986412	4319	0.20016
12	125988246	131042318	4092	-0.04633
12	131043683	133779052	1897	0.15762
13	19020199	21744932	1809	-0.26237
13	21745761	21838689	69	-0.11507
13	21839342	33587640	9211	-0.34038
13	33588602	33591767	4	-0.81397
13	33593083	41230652	6077	-0.4116
13	41232272	43149486	1397	-0.2177
13	43150980	45430034	1855	-0.383
13	45431078	47469675	1622	-0.25284
13	47470078	48730225	920	-0.38726
13	48731851	53453064	3611	-0.25147
13	53454136	60053678	5026	-0.44655
13	60055483	61400218	1058	-0.28641
13	61400833	81087831	15246	-0.40849
13	81089083	81109082	11	1.40855
13	81109867	81121521	7	-0.46851
13	81122160	81469754	250	1.44021
13	81472378	90437811	6688	-0.44151
13	90438951	92475453	1622	1.39769
13	92476671	92941917	373	-0.44863
13	92951474	93337699	317	1.38284
13	93352971	93849259	384	-0.45878
13	93853174	94022319	142	1.56677
13	94024086	94801306	651	-0.46445
13	94802505	101492188	5286	-0.31245
13	101493310	103135719	1338	-0.44203
13	103136628	103811357	552	-0.31804
13	103811986	108499217	3866	-0.49315
13	108501008	108660947	110	1.58914
14	19057587	19341317	98	-0.2222
14	19342164	20409237	652	0.08655
14	20410398	22659931	1687	-0.22344
14	22661917	22974429	242	-0.03794
14	22975074	23199691	159	-0.1924
14	23200171	23810568	455	0.23626
14	23812074	24421348	459	-0.18864
14	24422277	24520544	50	-0.59836
14	24523157	25079260	418	-0.14353
14	25082724	30510774	4165	-0.41271
14	30514967	31171161	499	-0.27585
14	31172484	32037106	630	-0.16464
14	32038021	32789578	546	-0.285
14	32790526	34466653	1378	-0.39682
14	34468041	34528969	53	0.12735
14	34530038	36623554	1492	-0.21452
14	36624807	36791021	131	-0.40858
14	36792558	37970520	920	-0.25624
14	37978092	39338355	982	-0.39381
14	39339811	40005004	451	-0.25329
14	40006192	45235098	3745	-0.42256
14	45236005	45601984	269	-0.30432
14	45603788	49841443	3073	-0.42786
14	49843181	51052220	908	-0.18384
14	51053291	51577206	430	-0.29249
14	51578835	52826108	986	-0.3995
14	52826644	53798036	687	-0.2647
14	53799018	54694704	704	-0.40754
14	54695718	56104115	1117	-0.20954
14	56104832	58472275	1833	-0.36624
14	58473972	59013681	410	-0.23704
14	59014473	64631378	4322	-0.34692
14	64632038	65905215	1021	-0.20569
14	65906440	66771335	666	-0.34773
14	66772051	66911574	109	-0.99088
14	66912578	67035931	92	-0.35194
14	67039923	67136780	61	-0.81809
14	67137768	67413646	182	-0.29162
14	67414813	67653172	183	0.10178
14	67654136	70258500	2093	-0.20277
14	70259295	73003841	2130	-0.33673
14	73005474	78523519	4348	-0.21125
14	78525367	79368080	729	-0.37501
14	79369347	80822080	1195	-0.47795
14	80823376	81482889	510	-0.35131
14	81484078	82259411	632	-0.19029
14	82260991	82636765	300	-0.34521
14	82638153	88239573	4470	-0.48419
14	88241060	90730049	1979	-0.3627
14	90731407	93974217	2529	-0.23212
14	93975216	95603199	1349	-0.35891
14	95604481	97020857	1175	-0.24902
14	97021885	97637872	528	0.09166
14	97638960	99428137	1521	-0.47808
14	99429984	99908355	405	-0.345
14	99908884	101258547	1075	-0.17233
14	101259616	101768882	416	-0.27522
14	101769505	106782654	3576	-0.16913
14	106783750	106827958	37	-0.71736
14	106828980	107288643	365	-0.25641
15	20045295	20232649	80	-0.16445
15	20233588	20579201	116	0.01527
15	20582213	20586946	5	-0.54511
15	20587741	20646289	43	0.08354
15	20651671	20833204	82	-0.08985
15	21257085	21285430	22	0.26089
15	22651181	22687499	24	-0.47994
15	22689493	22731727	16	-0.23688
15	22751226	23154623	282	0.12422
15	24046574	24516431	369	-0.11477
15	24516954	24761145	201	-0.27218
15	24762377	25415102	503	-0.11712
15	25418777	25513541	59	0.01772
15	25514686	26967927	1167	-0.09963
15	29526910	30421188	690	-0.00572
15	30422426	30487551	31	0.11805
15	30489607	30527839	31	-0.22079
15	30528609	31100671	357	-0.05658
15	31101288	31113941	11	-0.25647
15	31115001	32150654	811	-0.01071
15	32151600	32173254	18	-0.28924
15	32174670	32601650	327	-0.06091
15	32602587	32614017	11	-0.47689
15	32615329	33858958	947	-0.04226
15	33859887	34387025	406	0.06905
15	34388238	34728702	236	0.17612
15	34730747	34794812	50	0.52883
15	34795854	34845489	26	0.19267
15	34848526	34950982	82	0.3595
15	34951593	35231960	233	0.178
15	35232987	36187692	741	0.03412
15	36189177	36190814	3	-0.34508
15	36192129	38474870	1750	-0.03397
15	38475566	38481824	6	-0.32067
15	38482595	40098998	1293	0.03897
15	40100759	41875660	1258	0.21738
15	41876183	41909584	18	0.02263
15	41910597	45529528	2636	0.18215
15	45530913	46204836	503	0.05561
15	46205642	47292133	796	-0.0947
15	47292835	47396341	73	-0.23802
15	47397640	48025321	527	-0.11775
15	48026435	49003308	830	-0.01466
15	49004861	49769388	575	0.1006
15	49770860	49780692	9	-0.44797
15	49781896	50268948	326	0.04597
15	50269292	52677976	1813	0.19152
15	52679823	53067998	302	0.02035
15	53068873	55030800	1488	-0.08934
15	55032397	56542629	1029	0.08759
15	56543725	56548447	5	0.44654
15	56551290	58091604	1201	0.12423
15	58092341	58098026	5	0.37644
15	58098401	59074905	765	0.17753
15	59075596	61217981	1699	0.0756
15	61218576	62532400	1070	-0.03024
15	62534762	62568445	18	0.17547
15	62569797	63331505	632	0.04344
15	63332095	68238877	3758	0.20317
15	68240194	70988286	2246	0.08335
15	70989564	71854948	666	-0.03526
15	71856165	72495143	499	0.06934
15	72496235	72615867	99	0.22023
15	72617245	74177944	1221	0.05919
15	74179377	76706705	1733	0.21658
15	76708322	76962349	153	-0.31743
15	76964810	78551955	1170	0.12416
15	78553330	78562361	8	-0.36676
15	78563044	81138904	2048	0.10567
15	81139944	81614600	392	0.2066
15	81615729	82579832	753	0.1018
15	82580168	82591292	9	0.28177
15	82592504	83912293	776	0.1779
15	83913202	84847442	694	0.07446
15	85973766	88135737	1710	-0.07086
15	88137409	89123649	821	0.03885
15	89124497	91971499	2147	0.18935
15	91972929	92991577	842	0.0282
15	92994214	93861229	682	0.14309
15	93862291	96040590	1745	-0.03554
15	96040919	96835840	672	0.07373
15	96836940	100294532	2792	-0.02879
15	100296090	100446256	105	0.34885
15	100447515	101360928	704	-0.02392
15	101361839	102399948	824	0.10714
15	102405361	102503087	54	0.36005
16	71631	81530	8	-0.28031
16	84538	170822	66	0.38244
16	173011	5284438	3528	0.21299
16	5285556	7892604	2183	-0.0401
16	7893202	8696380	637	0.0791
16	8697749	9546690	643	0.20195
16	9548523	10307817	650	0.04841
16	10308877	12832206	1924	0.17577
16	12833026	14136419	1072	0.01114
16	14137546	15438945	862	0.11284
16	15440544	16284148	608	0.21364
16	16285706	19938113	2705	0.08147
16	19938932	19965361	24	-0.24814
16	19968224	20431094	400	0.05267
16	20432588	22284855	1319	0.18338
16	22287778	22330030	32	0.32509
16	22331343	23288162	734	0.09601
16	23289662	24175399	705	0.21834
16	24176304	24186620	10	0.00639
16	24187480	25515005	1048	0.1448
16	25515954	26920920	1154	-0.04744
16	26921778	27335615	339	0.09044
16	27337416	27350067	12	-0.7993
16	27351608	28738987	965	0.10126
16	28741043	31492590	1599	0.2196
16	31493231	32196573	379	0.03788
16	32200672	32237754	29	-0.35262
16	32244318	32628190	132	0.0999
16	32629608	33188107	239	-0.17071
16	33188922	33631189	205	0.06199
16	46783686	46850824	51	-0.22405
16	46854060	47011193	116	0.14492
16	47013465	47174168	120	0.40655
16	47175675	50080722	2312	0.04603
16	50081494	50741135	528	0.15614
16	50742173	51109959	317	0.02123
16	51113364	53041328	1604	-0.08165
16	53042964	53137712	74	0.08943
16	53139619	55491971	1931	-0.01077
16	55492813	58739666	2571	0.14941
16	58740612	59708580	742	-0.02899
16	59709547	65658385	4787	-0.13787
16	65658897	66391715	628	0.03935
16	66393423	70827960	3223	0.21579
16	70829706	72472198	1304	0.11273
16	72473520	74202620	1410	-0.02829
16	74204390	74481062	181	0.10739
16	74483574	74559194	59	-0.23538
16	74560705	75538819	734	0.18409
16	75539961	75576808	29	0.63877
16	75577843	75957321	275	0.14708
16	75958266	78257484	1884	-0.03176
16	78258612	78371222	100	0.27553
16	78372792	78383297	11	-0.49445
16	78384926	79753138	1181	0.27706
16	79754481	80152017	339	0.45061
16	80153002	81161209	819	0.31081
16	81161619	81930797	624	0.47138
16	81932166	82474121	430	0.33689
16	82475413	83615061	978	0.23383
16	83616027	84468899	701	0.40609
16	84470119	85642425	920	0.50678
16	85644076	86158991	414	0.21703
16	86159431	86904023	623	0.03988
16	86905544	88444774	1167	0.19253
16	88445979	88860414	313	0.45819
16	88861831	90285773	931	0.25027
17	404	2544144	1781	-0.2021
17	2544870	3248098	502	-0.3059
17	3249609	5695260	1838	-0.16292
17	5696834	6747134	868	-0.31974
17	6747988	8798997	1554	-0.15211
17	8800036	15595021	5616	-0.39596
17	15595785	18354335	2123	-0.16498
17	18355639	18399202	36	-0.45584
17	18400527	25373317	2770	-0.23288
17	25374737	26899300	1146	0.19758
17	26899704	27272663	282	0.58859
17	27273322	38908488	8693	0.16568
17	38910022	39452588	438	0.06087
17	39453548	44426115	3703	0.23368
17	44427815	44568817	119	-0.35559
17	44572263	44650486	51	0.08667
17	44652005	44782156	108	-0.42531
17	44784936	49629881	3753	0.2055
17	49630200	52886167	2469	-0.06766
17	52888136	54599343	1360	0.05111
17	54600452	63462481	6904	0.15529
17	63463759	64350081	697	0.0231
17	64351207	64496659	123	-0.27898
17	64499405	66489663	1554	0.11667
17	66490992	68167529	1351	-0.00851
17	68167928	68171917	4	-1.367
17	68172619	70451571	1918	-0.11003
17	70453136	72556829	1728	0.08544
17	72557970	81060000	6344	0.21411
18	15050	132471	34	0.30382
18	133388	1443790	955	0.45821
18	1445294	2412438	728	0.32253
18	2414013	4109203	1257	0.43714
18	4110495	7311952	2437	0.21154
18	7313530	7479651	126	-0.10029
18	7480286	8026083	423	0.1833
18	8027483	8638851	497	0.29379
18	8640595	9666719	752	0.40137
18	9668966	10062178	316	0.5591
18	10063606	10414225	283	0.44229
18	10415735	10861090	357	0.3421
18	10862331	11525059	517	-0.04547
18	11528159	12120455	407	0.10863
18	12121713	12181334	26	0.4407
18	12188397	13205625	723	0.14694
18	13206809	14061025	641	0.00055
18	14061987	15380613	662	-0.12834
18	18520486	18825577	223	-0.00478
18	18826951	19500167	483	0.11419
18	19502486	19537773	25	0.458
18	19539091	20710892	872	0.28233
18	20711961	20719918	7	-0.05078
18	20720902	21309340	434	0.36586
18	21311252	21524697	181	0.03306
18	21525557	21996274	353	0.20382
18	21997592	22399322	329	0.40994
18	22400317	23532234	928	0.62099
18	23533323	24561830	802	0.41796
18	24562669	24766700	158	0.71746
18	24767598	24911594	103	0.91383
18	24913148	25089556	148	0.53792
18	25096293	27932612	2165	0.13062
18	27934250	27935948	3	-0.23723
18	27937055	29261592	1068	0.22334
18	29263424	29266369	4	-0.42328
18	29267335	32337249	2316	0.17396
18	32338064	33264371	732	0.30489
18	33264844	33269838	5	0.05261
18	33271114	34085087	600	0.3579
18	34086463	35551303	1147	0.25425
18	35552872	36989750	1154	0.13542
18	36990225	37203001	162	-0.13546
18	37204036	37348222	115	0.09739
18	37349183	37891877	433	0.32587
18	37892281	39422887	1262	0.12951
18	39424245	39562671	121	0.58823
18	39563698	39585576	21	0.14011
18	39587158	42773395	2449	-0.46496
18	42774018	43296645	432	-0.31442
18	43296979	44149497	658	-0.17594
18	44150873	45082419	745	-0.31393
18	45083310	45177076	76	-0.45856
18	45178649	46021776	712	-0.33889
18	46023114	47196210	928	-0.19746
18	47197245	49018019	1454	-0.30097
18	49019294	51461774	1963	-0.46646
18	51462162	53261602	1353	-0.35135
18	53262540	53424269	134	-0.20961
18	53425415	54773431	1088	-0.34132
18	54774682	55979242	982	-0.23723
18	55979583	57864128	1499	-0.36119
18	57865306	57933821	52	-0.48482
18	57934807	57942827	7	-0.1185
18	57943895	59541573	1277	-0.4426
18	59542160	61319639	1442	-0.32383
18	61321368	71748369	8282	-0.45697
18	71749595	72034924	228	-0.29719
18	72036397	76921382	3929	-0.41426
18	76922741	78014850	839	-0.28988
19	69411	119450	32	0.41361
19	122892	4599302	3159	0.23178
19	4600526	4604350	4	0.482
19	4606406	8949778	3133	0.18928
19	8951519	9274673	259	0.04692
19	9276027	9284097	8	-0.70752
19	9286482	9966636	473	0.07091
19	9968277	11776476	1322	0.25312
19	11778041	12740211	722	0.13794
19	12741409	13490274	558	0.262
19	13492392	13685686	162	0.13157
19	13686780	14922584	900	0.23757
19	14925048	16438753	1171	0.13594
19	16439870	19886449	2584	0.24358
19	19887776	20616100	428	0.06941
19	20617028	20716924	51	-0.38297
19	20718221	22113104	917	0.09724
19	28705238	29915677	972	0.0818
19	29917279	30348943	349	0.19608
19	30349592	31195195	715	0.06111
19	31196938	32616260	1225	-0.04127
19	32616965	34696900	1671	0.10307
19	34697749	34967570	215	0.21173
19	34969240	34985441	12	-0.05488
19	34986613	36803590	1378	0.18965
19	36805044	38151704	987	-0.03292
19	38153029	38627561	376	0.08572
19	38628981	44335502	4332	0.21126
19	44337309	45002078	519	0.07948
19	45003721	52300090	5410	0.23013
19	52301805	54554852	1640	0.10305
19	54556330	54560036	5	-1.92248
19	54561674	54907678	278	0.20826
19	54908282	55297448	298	0.09777
19	55298553	56220876	697	0.24711
19	56222525	56816512	484	0.11882
19	56817108	58620482	1457	0.01731
19	58621540	59107773	368	0.26138
20	60373	757167	549	-0.10654
20	758279	791685	17	0.08947
20	794568	1548198	614	-0.19542
20	1549027	2369852	677	-0.31794
20	2370612	6177775	2936	-0.18626
20	6179612	11109682	4077	-0.42225
20	11110996	11156469	35	-0.63126
20	11158084	13382021	1743	-0.48804
20	13383004	14125060	562	-0.35861
20	14125419	17306850	2526	-0.46763
20	17307910	19130901	1386	-0.2883
20	19131619	22163927	2422	-0.41294
20	22164322	23549454	1099	-0.27182
20	23550180	24811217	945	-0.38751
20	24812771	26143082	783	-0.24185
20	26144549	26233443	70	-0.02272
20	29833958	37768817	5777	0.21
20	37770632	38078467	258	0.10281
20	38079176	39126977	843	-0.03554
20	39127486	40547190	1128	0.16134
20	40549961	41204756	552	0.00229
20	41205788	41241089	31	-0.48949
20	41242821	41853482	509	-0.00054
20	41854539	46535715	3586	0.17851
20	46536793	47024281	397	0.07194
20	47025193	50027723	2259	0.19876
20	50028482	52984026	2326	0.03838
20	52985109	54647630	1302	-0.08549
20	54648747	58178784	2902	0.11854
20	58180356	60269757	1752	-0.02986
21	15380144	15837117	330	0.07876
21	15838309	16361902	403	0.18017
21	16362894	17389309	817	-0.00783
21	17390580	18917089	1076	-0.11803
21	18918563	18939181	19	0.10293
21	18940231	20386521	1090	-0.09353
21	20387090	20435714	41	-0.21791
21	20437150	23279684	2197	-0.04078
21	23281150	23284294	3	0.31836
21	23285456	23740271	343	0.03696
21	23741738	25502679	1321	-0.08503
21	25503602	29216203	2933	0.16098
21	29219047	29433593	158	-0.01171
21	29435127	30038783	460	0.22901
21	30039324	31193883	939	0.40479
21	31194702	31490864	250	0.30446
21	31492510	32935828	1181	0.19892
21	32937195	33871886	726	0.33137
21	33873717	33884022	5	-0.08688
21	33884761	36499546	2119	0.42038
21	36500257	36505630	6	0.66929
21	36507193	40311594	3098	0.36425
21	40313847	41304825	794	0.465
21	41306557	41413175	83	0.35682
21	41413624	42915524	1221	0.2046
21	42915981	43997852	858	0.38906
21	43999159	45710135	1192	0.49645
21	45711328	46056173	237	0.39642
21	46059424	46078373	17	0.54878
21	46080048	46811645	571	0.44321
21	46812066	47141686	250	0.32513
21	47143293	48109178	712	0.45104
22	16050690	16472140	214	0.07409
22	16485181	16690749	59	-0.20886
22	16874010	16983619	50	0.35901
22	16989272	17245644	132	0.85254
22	17247066	17299718	31	1.27554
22	17300842	17920395	393	0.30246
22	17921261	18925066	674	0.48104
22	18925414	20313261	1038	1.36351
22	20314496	20376596	26	0.70284
22	20377434	20487343	65	1.28762
22	20707910	21463977	528	1.45699
22	21465854	21710291	113	0.60972
22	21711906	21936459	128	1.35926
22	21937749	22579004	457	1.67981
22	22579664	22671596	27	0.88162
22	22673122	22935106	194	1.61429
22	22936069	23632036	534	2.0204
22	23632952	25016658	1039	-0.10051
22	25028271	25044497	10	0.78168
22	25058269	27381532	1955	-0.20446
22	27382437	28298084	791	-0.31293
22	28300004	33082413	3710	-0.18465
22	33083732	35372864	1894	-0.43211
22	35374177	43692438	6524	-0.16314
22	43693791	46250801	2093	-0.30952
22	46251450	47444475	971	-0.20453
22	47445295	49959549	2125	-0.35441
22	49960508	51237712	888	-0.1329
X	3739929	3855346	84	0.29243
X	3857611	5247013	1122	-0.43701
X	5247577	5254439	7	-0.72241
X	5255692	6922841	1362	-0.48955
X	6924626	6962958	34	-0.1163
X	6963977	9117380	1735	-0.46452
X	9118827	11081741	1556	-0.35925
X	11082771	11702658	524	-0.21771
X	11703640	12656803	764	-0.39451
X	12657920	13876685	994	-0.29407
X	13878028	15458695	1230	-0.40378
X	15460055	17378847	1489	-0.28102
X	17379441	23343733	4639	-0.4171
X	23344849	23555115	143	-0.29542
X	23556477	24306120	553	-0.18616
X	24307040	25270525	791	-0.33042
X	25271551	30445816	3871	-0.48203
X	30447065	30628846	138	-0.37515
X	30630676	30836266	146	-0.27213
X	30838284	32408680	1288	-0.41008
X	32409186	32445451	27	-0.65292
X	32446605	33483902	797	-0.49316
X	33484890	33713848	161	-0.10867
X	33715015	33754216	33	-0.32096
X	33754515	37502323	2680	-0.47058
X	37503662	39354434	1499	-0.35498
X	39355793	39363072	8	-0.6059
X	39364855	41682678	1807	-0.2908
X	41684088	46682913	3635	-0.39648
X	46686348	48374583	1162	-0.22914
X	48375804	49458992	591	-0.11987
X	49461984	49811290	268	-0.28893
X	51786191	51808754	19	-0.68612
X	52509611	53760715	887	-0.24699
X	61948285	62022126	19	-0.12722
X	62024825	64360303	1281	-0.42748
X	64367005	64557949	83	-0.30644
X	64558996	65546084	596	-0.19726
X	65546937	66095345	298	-0.31422
X	66096523	67109943	576	-0.42498
X	67113344	67128205	8	-0.00853
X	67129257	69712717	1855	-0.32838
X	69713831	70901985	740	-0.20428
X	70902904	73424278	1535	-0.32492
X	73425341	73452769	21	-0.49558
X	73453422	80011072	3531	-0.36555
X	80012028	80014378	3	-0.14858
X	80015288	93856698	9170	-0.41786
X	93858366	94012176	101	-0.3074
X	94013211	98089576	2876	-0.45721
X	98091565	98117757	15	-0.18579
X	98119083	102055291	2712	-0.38555
X	102058120	103171659	825	-0.25564
X	103172666	105510406	1717	-0.47527
X	105511075	105543263	30	-0.61548
X	105544655	108791665	2319	-0.35489
X	108792336	110129842	1012	-0.25465
X	110130830	113179128	2233	-0.43314
X	114397756	117200693	1768	-0.39274
X	117202175	120434996	2319	-0.24943
X	120435840	122242876	1201	-0.37179
X	122243984	123538287	943	-0.26852
X	123539311	127503146	2717	-0.39417
X	127504475	128280717	566	-0.49573
X	128281891	128765714	343	-0.35189
X	128766882	129763477	768	-0.18738
X	129764559	131395263	1254	-0.32937
X	131396311	133115161	1385	-0.44855
X	133116434	134851993	1351	-0.27584
X	134852592	134891363	23	-0.98313
X	134892475	134927662	20	-0.35694
X	134928792	134968405	22	-0.90972
X	134973743	135823767	698	-0.25317
X	135824681	136156523	249	-0.12869
X	136163764	139375269	2367	-0.38344
X	139376897	143149976	2700	-0.51148
X	143150735	143293273	113	-0.255
X	143294986	148533515	3860	-0.46681
X	148534489	152573148	2915	-0.29191
X	152574379	153411634	587	-0.16416
X	153413179	153523989	72	0.07948
X	153524428	153985714	314	-0.13429
X	153987058	155056387	694	-0.24536
X	155057813	155254115	124	-0.11451
Y	2650810	2910043	182	0.12185
Y	2911812	3712821	568	-0.3454
Y	3714152	3720070	7	-1.86091
Y	3721179	6101993	1609	-0.36875
Y	6102917	6400632	215	0.07531
Y	6406039	6619879	155	-0.37996
Y	6620738	7080479	299	0.10993
Y	7081250	7454995	273	-0.05687
Y	13976161	14705315	483	-0.0106
Y	14706374	15802518	719	0.11114
Y	15809437	18073180	1508	0.0018
Y	18074436	25525471	4853	0.11269
Y	25531997	25619015	77	0.4815
Y	25620175	28342671	1851	0.14013
Y	28343828	28561144	169	0.43807
Y	28562215	28754561	137	0.05962

## Sheet: hg19_Filtered_289349_WG_K562vsF
CHROMOSOME	START	STOP	DATA POINTS	LOG2_RATIO_MEAN
1	358381	404019	26	0.54642
1	918768	1479297	350	0.05596
1	1480394	2241907	554	0.1633
1	2959542	6664529	2799	0.13392
1	6666778	7064500	318	0.27604
1	7065537	7561698	412	0.17033
1	7562853	7741731	148	0.02795
1	7742083	8369914	485	0.2244
1	8370909	8429456	51	0.02288
1	8430970	9075612	507	0.29458
1	9077599	9835421	569	0.14061
1	9836470	10670871	615	0.30879
1	10671388	10823538	121	0.05902
1	10824457	12271694	1142	0.20284
1	12272645	12605378	273	0.40376
1	12606775	16828533	2974	0.21514
1	16830138	17006059	62	0.37652
1	17008394	20218441	2503	0.17091
1	20219126	20241341	20	0.46795
1	20242860	20260793	17	-0.03013
1	20261940	25183547	3794	0.23578
1	25184397	25226841	36	0.04659
1	25228105	25427934	168	0.17533
1	25429139	27354427	1478	0.30275
1	27355815	27524672	124	0.14901
1	27525766	27918400	288	0.26074
1	27919262	27927447	5	-0.14015
1	27931605	29763294	1314	0.31529
1	29764410	30897015	824	0.21336
1	30898540	31988610	796	0.32001
1	31989990	31998431	9	0.58389
1	32000483	37494152	4240	0.26641
1	37495359	37507879	12	-0.37818
1	37508888	43887064	4990	0.28529
1	43888036	43920181	29	0.03839
1	43921520	48726562	3585	0.31331
1	48727997	51125062	1766	0.21186
1	51126927	53728421	1913	0.31744
1	53729469	53734648	6	0.52492
1	53736136	55265688	1216	0.2524
1	55267066	55534632	199	0.00914
1	55535605	55891127	298	0.12447
1	55892534	64627246	7040	0.02023
1	64628688	64633090	3	0.27067
1	64633492	65299330	540	0.06132
1	65300776	66427265	882	0.17209
1	66428684	68042954	1279	0.068
1	68043924	68476201	358	0.16831
1	68477860	71631743	2368	0.06263
1	71632692	71645244	9	0.3446
1	71646153	77795373	4701	0.02135
1	77798725	77816084	17	0.17916
1	77817228	78986257	876	0.07736
1	78987759	83430279	3482	-0.03092
1	83431266	94564902	8562	0.08057
1	94565537	94609073	34	-0.21163
1	94609716	95293887	534	0.01395
1	95295180	96012961	579	0.11879
1	96014179	99766416	2943	-0.00121
1	99767348	101934656	1663	0.15394
1	101935525	107317140	3934	-0.00193
1	107318141	108552047	1009	0.25913
1	108553275	109786894	907	0.38218
1	109787672	109817581	24	0.03024
1	109818345	112690264	2287	0.3114
1	112693366	112704576	7	1.51906
1	112705892	120530834	5981	0.3241
1	120532480	120575673	35	-0.00405
1	148568391	162348012	9802	0.07859
1	162349293	166856763	3508	0.25932
1	166858219	168762753	1540	0.38246
1	168763654	171617590	2117	0.25187
1	171618454	172471634	665	0.39621
1	172473002	180583850	6177	0.29342
1	180584918	180594320	9	0.69195
1	180594676	187485318	5477	0.32739
1	187486116	192097940	3487	0.18595
1	192099062	193038933	741	0.30426
1	193040071	193044223	4	0.15293
1	193045170	193549521	398	0.34914
1	193550185	196712175	2405	0.23289
1	196713047	196989793	208	0.05034
1	196993277	199166572	1713	0.31896
1	199167661	200235423	817	0.18464
1	200236646	206636967	4845	0.30195
1	206638321	207963482	1062	0.41225
1	207964385	210323367	1954	0.29129
1	210324525	210818876	391	-0.00192
1	210820311	214617918	2954	0.31278
1	214618804	214732937	95	0.14709
1	214734292	223733825	7179	0.24891
1	223735677	223744362	6	-0.27899
1	223746427	227900547	2947	0.31723
1	227909665	228364164	312	0.17429
1	228365552	237228464	7033	0.27462
1	237231265	241171353	3214	0.17043
1	241172824	241178085	6	-0.08607
1	241180390	248745280	5742	0.25803
1	248748731	248796029	38	-0.24876
2	12380	377706	287	0.05535
2	378590	3210861	2203	-0.07247
2	3212388	38377377	27612	0.04254
2	38379475	39351318	747	0.14883
2	39352441	54458803	11928	0.03434
2	54459145	55903062	1151	0.18737
2	55904197	69102730	10098	0.07161
2	69104962	69719948	483	0.17929
2	69720893	89357378	14879	0.03367
2	96105432	109996691	10750	0.01877
2	111335553	113409475	1628	0.06316
2	113410562	113874918	381	0.24783
2	113875965	144591969	23287	0.00395
2	144593052	146875481	1884	0.11198
2	146877000	149339674	1883	0.0066
2	150288060	152946589	2078	0.35445
2	152947867	157403305	3304	0.21836
2	157404792	159237200	1359	0.34468
2	159237823	168828402	7495	0.23032
2	168830082	171851781	2358	0.37164
2	171853205	171865205	9	0.00648
2	171866435	177504706	4425	0.29705
2	177505670	179650732	1751	0.40512
2	179652549	188705973	6693	0.25439
2	188707457	210253353	16350	-0.19399
2	210254019	210270538	16	-0.40603
2	210271726	239594437	22994	-0.2786
2	239595872	242120687	1865	-0.39066
2	242121491	243088244	655	-0.21974
3	60554	609625	454	0.24475
3	610769	665404	42	-0.23774
3	666274	3737877	2434	0.19862
3	3740624	4153993	302	0.30287
3	4155525	5525795	1076	0.41223
3	5527591	22940300	13136	0.2735
3	22941607	23125786	132	0.15385
3	23127344	26434048	2571	0.29028
3	26435864	27866350	1050	0.16773
3	27867597	27872156	5	-0.19754
3	27873132	32535860	3653	0.22801
3	32536767	34467180	1428	0.33414
3	34476318	35881284	1041	0.23039
3	35882085	35887501	6	0.54607
3	35888986	48227306	9205	0.31499
3	48228182	49974718	1062	-0.29346
3	49978380	50223422	160	-0.13034
3	50224220	50706176	360	-0.35133
3	50707765	51201355	283	-0.10612
3	51202943	53973081	1975	-0.23787
3	53973971	56523041	2103	-0.34346
3	56523928	59742493	2354	-0.22116
3	59743984	60075319	286	-0.7565
3	60076218	60237403	139	-0.25133
3	60239186	60482621	200	0.00825
3	60483421	60545481	54	0.46863
3	60547009	60752673	166	-0.66234
3	60753631	69475826	6889	-0.2794
3	69477347	70531942	842	-0.1304
3	70533309	75749587	3974	-0.25504
3	75759346	75972908	68	0.23282
3	99345631	102052453	1968	-0.1407
3	102053827	119139438	13013	-0.25608
3	119141164	119335065	159	-0.1069
3	119335941	123050603	2738	-0.20918
3	123052823	123069952	16	-0.5756
3	123071693	124955688	1570	-0.28924
3	124958034	125628077	335	-0.1633
3	125629484	126277985	484	-0.36927
3	126278927	129715834	2627	-0.25548
3	129717844	130197347	227	-0.11643
3	130197788	134359770	3171	-0.23392
3	134361180	135896955	1185	-0.33408
3	135900250	138196665	1626	-0.20803
3	138197747	139718309	1113	0.1135
3	139719398	140425648	561	-0.01509
3	140426542	143390916	2240	0.11097
3	143392220	149884362	4935	0.01089
3	149885167	152677073	2150	0.11214
3	152678719	154376409	1230	0.01135
3	154376823	158273082	2875	0.11554
3	158275282	159888497	1249	0.01126
3	159889876	160803781	709	0.13788
3	160804361	162510227	1258	-0.00225
3	162513303	162525677	12	0.60136
3	162527112	162543232	9	-0.54657
3	162545705	162623687	56	0.51408
3	162625640	167598531	3513	0.00127
3	167599273	168012690	324	0.16653
3	168013504	170450613	1899	0.05451
3	170451603	172102301	1337	0.19143
3	172103655	178932413	5197	0.03662
3	178933615	178961313	24	0.50349
3	178962683	182234668	2502	0.01134
3	182235972	183534685	992	0.13758
3	183535193	183547252	9	-0.57146
3	183547832	186656194	2350	0.04753
3	186656612	186925325	199	0.17169
3	186926979	191063568	3323	-0.02876
3	191064677	191071266	7	-0.79726
3	191072402	194954221	3037	0.01401
3	194959879	197898350	1913	0.13186
4	29861	581188	342	0.10303
4	581962	1049914	285	-0.0725
4	1050821	1137391	66	0.15763
4	1883915	3362651	1025	0.06636
4	4442984	5365460	709	0.0295
4	5367037	6458249	854	-0.08633
4	6459884	7184600	537	0.07329
4	7185782	8621730	1089	-0.08544
4	10185171	10211202	23	0.31429
4	10211985	10214144	3	1.06328
4	10216240	10233823	17	1.86395
4	10235231	10410742	145	0.2038
4	10411292	20237766	7704	0.00336
4	20239329	20262723	22	-0.22593
4	20263960	26579374	5049	-0.02034
4	26580600	26970306	296	0.09403
4	26971159	34779010	6055	-0.00781
4	34780245	34826266	33	-0.86661
4	34830384	38529039	2816	-0.01647
4	38530277	40587329	1464	0.10686
4	40588017	47664100	5318	-0.01616
4	47665266	49008669	1029	0.13042
4	55938504	57099332	880	0.15793
4	57100202	59427681	1675	0.01981
4	59428965	59509177	56	0.21248
4	59509710	67774101	5957	-0.0186
4	67776005	67788876	13	0.29157
4	67789885	68254375	333	0.04003
4	68255129	68776751	380	0.15639
4	71579534	71612433	27	0.22736
4	71613160	74741462	2196	0.08047
4	74742949	75283010	416	0.22465
4	75284160	79312120	2962	0.07002
4	79312974	81272499	1512	0.17319
4	81274169	87915368	4962	0.06275
4	87920054	88023708	87	0.20104
4	88024640	90523919	1863	0.03645
4	90524712	90538274	10	0.33139
4	90539370	95095137	3357	-0.01266
4	95096461	95674921	461	0.1032
4	95675993	95681106	5	-0.36552
4	95682051	103388972	5671	0.02021
4	103390761	103391483	2	0.39291
4	103392613	113393785	7359	0.04949
4	113395096	113429930	17	0.24818
4	113430620	123059353	7164	0.00261
4	123067835	124323469	931	0.16053
4	124324524	127155730	2156	0.01621
4	127158220	130086327	2082	0.11777
4	130087437	135608547	3960	-0.0092
4	135609373	135626957	15	-0.30324
4	135628336	144711656	6896	0.01992
4	144712852	144735294	18	0.35026
4	144737091	145415910	493	0.10231
4	145417104	151050093	4257	-0.00291
4	151051437	152408323	1010	0.12499
4	152409152	153161658	609	0.02429
4	153163957	154407315	968	0.12692
4	154409844	154419195	8	0.36769
4	154420050	155974426	1224	0.09229
4	155975911	157862603	1510	-0.02551
4	157863509	157894175	28	-0.23071
4	157895023	160488172	1971	0.06263
4	160493276	160495656	3	-1.12485
4	160496126	160679166	128	-0.50472
4	160680430	160944626	194	-0.69275
4	160946052	163447983	1904	-0.57787
4	163448559	163817285	277	-0.20921
4	163818125	170363017	4898	-0.01045
4	170363850	170581594	146	0.13774
4	170581970	173759883	2406	0.01139
4	173760498	173822063	47	0.16572
4	173823163	176141754	1791	0.06418
4	176142493	183059630	5508	-0.04193
4	183060650	183067905	7	-0.56682
4	183068944	188671082	4425	0.00785
4	188672881	191026128	1631	-0.10578
5	14740	667463	413	0.22278
5	669613	747271	43	0.04796
5	750567	786875	21	-0.196
5	789116	1531315	496	0.09709
5	1532499	1645284	57	0.2799
5	1648940	1665156	11	-0.0959
5	1669651	1696909	20	0.45095
5	1698111	4309413	2102	0.12303
5	4310141	4361372	44	0.2235
5	4362630	4453700	76	0.04773
5	4455072	9831338	4255	0.2142
5	9832159	11178518	1051	0.33875
5	11179174	28694669	13145	0.17654
5	28695868	28713142	14	0.37046
5	28713904	38575554	7314	0.24498
5	38576289	38600625	20	0.12852
5	38602024	44141936	4008	0.29874
5	50396169	52796874	1829	0.00747
5	52799612	53464475	477	0.11808
5	53465745	53561631	77	-0.25485
5	53562624	80782458	20295	0.0648
5	80784906	81706136	693	0.18768
5	81706607	89802835	6094	0.06259
5	89803932	90752295	725	0.17737
5	90754039	94443313	2766	0.01662
5	94444219	96896616	1884	0.16235
5	96897703	111688398	10898	0.02666
5	111689332	112222099	379	0.14431
5	112223380	118019748	4377	0.02437
5	118020607	119224512	862	0.17108
5	119225815	130116452	8038	0.03347
5	130117382	132096258	1405	0.14904
5	132097683	132167127	57	-0.06
5	132168783	146246479	10686	0.07538
5	146246891	147395903	900	-0.05171
5	147397092	153447809	4705	0.04884
5	153448574	153456717	4	-0.15732
5	153457800	154698212	958	0.10111
5	154699524	158301290	2787	-0.00758
5	158302122	158962396	527	0.13772
5	158963260	163221718	3214	-0.00084
5	163223375	163759142	438	0.27887
5	163759524	163899318	115	0.07226
5	163901229	164460825	424	-0.1969
5	164462143	168732316	3515	-0.05866
5	168734780	169578177	678	0.04669
5	169580175	169584222	5	0.34381
5	169585990	172774415	2459	0.00317
5	172775945	173559124	643	0.10614
5	173559666	180374858	4976	-0.00554
5	180376713	180429771	42	-1.08331
5	180432252	180891419	226	0.18784
6	60001	2388895	1822	0.24595
6	2390158	3540286	921	0.35491
6	3541610	12000221	6777	0.24989
6	12001844	12199367	160	0.38553
6	12201135	20834651	6847	0.28491
6	20836173	20837893	3	-0.12498
6	20839802	25678720	3826	0.20239
6	25679269	26665636	809	0.33372
6	26666496	26964219	197	0.07515
6	26966530	31285088	3201	0.33722
6	31285627	31958018	426	0.43919
6	31962903	32019113	37	-0.20195
6	32019811	32452918	301	0.33482
6	32453786	32635173	133	0.06052
6	32636251	37829993	3767	0.30911
6	37830839	38209315	310	0.16908
6	38210528	51738913	10515	0.27191
6	51746443	52797955	827	0.1215
6	52798929	55825377	2351	0.01524
6	55827190	55846194	17	-0.59574
6	55847853	57434877	1243	0.07888
6	57435542	57757916	233	-0.12546
6	68013665	69501756	1078	0.09919
6	69502527	69536547	27	0.46432
6	69537130	111685205	31203	0.0435
6	111687461	111923751	193	0.15472
6	111924805	116125360	3235	0.01125
6	116127499	120421704	3219	0.11467
6	120423760	124832232	3145	0.00892
6	124833341	127079443	1660	0.17511
6	127080606	129520112	1859	0.00925
6	129520727	130352166	666	0.14788
6	130352767	135292738	3790	0.0464
6	135293952	138026226	2104	0.30962
6	138027291	138679500	507	0.41725
6	138680592	146403816	5691	0.25308
6	146407393	148191791	1386	0.41538
6	148192768	156944533	6704	0.23462
6	156946216	156949442	4	0.82872
6	156950064	160609177	2733	0.32431
6	160611104	161406676	546	0.2175
6	161407816	161665233	208	0.61777
6	161666223	170620960	6829	0.19244
6	170622181	171047052	275	0.38765
7	1878107	1915878	31	-0.29909
7	1916626	3415079	1157	-0.08257
7	3416312	3570629	135	0.02409
7	3571976	5686541	1556	-0.0891
7	5687315	7177432	939	0.01586
7	7178295	8824290	1266	0.13083
7	8825457	8865981	32	-0.51749
7	8867112	11957736	2246	0.05737
7	11959022	11994671	25	-0.1425
7	11995553	13146093	851	0.13472
7	13147634	16057942	2194	0.017
7	16058785	17076303	784	0.15019
7	17076881	21988252	3754	0.01878
7	21989465	23254603	990	0.1366
7	23255589	23258696	4	0.46079
7	23259953	26136350	2222	0.08592
7	26137562	26147193	9	-0.5925
7	26150312	27026822	675	0.05198
7	27028187	27252583	157	-0.1195
7	27253119	28243651	802	0.05785
7	28244955	28251468	7	0.34581
7	28252667	29845030	1326	0.00872
7	29846626	30880046	812	0.12738
7	30881179	30973745	83	-0.09054
7	30974697	32511207	1223	0.03883
7	32512926	32525004	12	-0.06765
7	32525983	33546539	748	0.12882
7	33547314	36337154	2215	-0.00535
7	36338269	36747207	320	0.24448
7	36748724	38004937	1010	-0.0125
7	38005362	39829787	1468	0.0967
7	39839630	42690004	2254	-0.02396
7	42691217	44002534	1030	0.11495
7	44004395	44313821	234	-0.09839
7	44314378	44999244	508	0.03582
7	45000282	45023683	22	-0.24255
7	45025354	45580737	439	0.06633
7	45582280	56743086	8591	-0.04527
7	56744715	57920902	822	-0.16632
7	62482154	63008737	392	-0.05401
7	63009076	63063923	40	-0.3613
7	63064449	63309823	162	-0.13225
7	63310115	63887797	450	0.04697
7	63889744	65541872	1102	0.17126
7	65543335	65555645	11	-0.13315
7	65556722	67362723	1404	0.21738
7	67363090	68777434	1168	0.05035
7	68777883	68791263	10	-0.22002
7	68792222	72855054	3246	0.10425
7	72856406	73110884	196	0.2116
7	75043848	86250580	8570	0.18522
7	86252910	87184265	712	0.35391
7	87185923	91241065	3064	0.20174
7	91241660	93286656	1533	0.32567
7	93293541	96540311	2548	0.20507
7	96542156	96552271	9	0.52822
7	96553499	97838052	887	0.16914
7	97839066	97868402	20	-0.15025
7	97869446	97912242	34	-0.4355
7	97913432	98632011	584	0.13681
7	98632695	99816444	909	0.25437
7	99817017	101958139	1558	0.10428
7	101958487	102090716	86	0.23751
7	102091279	102329872	130	-0.04968
7	102332079	102763047	303	0.35089
7	102764080	102940520	134	0.17136
7	102941634	104619208	1306	0.31363
7	104620655	105972379	1074	0.47846
7	105973690	105988027	10	0.19983
7	105989043	108509431	1965	0.54014
7	108510691	110181698	1226	0.37598
7	110182883	110190180	7	0.81033
7	110191299	111416596	962	0.49492
7	111417564	115977431	3527	0.39388
7	115978759	117042442	865	0.5261
7	117042913	120369759	2570	0.41918
7	120370428	121188580	658	0.6275
7	121189060	126976952	4447	0.4049
7	126978535	127958827	807	0.52571
7	127960578	128864157	688	0.39217
7	128866118	128927662	52	0.56194
7	128929952	131106162	1595	0.46029
7	131107371	132144576	870	0.35888
7	132146107	133783746	1375	0.48792
7	133784946	133797334	11	1.00161
7	133799156	142473493	6873	0.42938
7	142486374	157181895	11303	0.38489
7	157183018	158222470	797	0.25949
7	158223609	159127480	706	0.46658
8	10170	273681	137	0.21034
8	275619	594285	250	0.02271
8	595174	599394	5	1.21076
8	600959	6376038	4605	-0.05731
8	6377441	6836481	384	0.05225
8	6837581	6880547	38	-0.38098
8	6882130	13302999	4254	0.01576
8	13303935	13514853	167	-0.10236
8	13516557	13541388	23	0.11046
8	13542529	22894954	7387	-0.02097
8	22895558	24282241	1092	0.09125
8	24283609	26005496	1366	-0.07612
8	26006541	31839367	4608	0.04894
8	31840495	31867606	24	-0.13388
8	31868698	37702826	4550	-0.03369
8	37704408	39909586	1571	0.06851
8	39910737	39920023	9	-0.32324
8	56198300	57151910	694	0.10763
8	57152815	59329440	1624	-0.00058
8	59330867	59733163	315	0.15831
8	59734965	70155193	7824	0.02607
8	70160753	71051194	656	-0.09463
8	71052678	90742561	14314	0.00555
8	90743962	92472798	1345	0.1984
8	92473507	110662112	14168	0.06549
8	110662837	110670739	8	0.30487
8	110671541	117634796	5366	0.01132
8	117636521	118304711	560	0.11619
8	118306606	123520742	4165	-0.04043
8	123521538	124797900	1043	0.13488
8	124799322	124803473	5	0.42616
8	124805045	128386414	2883	0.04575
8	128387526	130491516	1709	0.14989
8	130492295	130909775	318	0.25116
8	130910883	132105598	994	0.0936
8	132106594	141138304	7397	-0.03845
8	141138915	142213732	848	0.09
8	142215599	142978302	557	-0.09029
8	142980174	143705457	570	-0.21628
8	145781057	146294027	347	0.15587
9	28046	604948	450	-0.1267
9	605848	4501108	3057	-0.27886
9	4502016	6117236	1161	-0.13977
9	6118222	20755046	11379	-0.27786
9	20756174	22247433	1111	-1.29055
9	22250551	23409432	853	-1.1372
9	23410644	23810824	348	-1.58164
9	23811344	26269728	1806	-1.13518
9	26270980	26583763	233	-1.32917
9	26585805	28545460	1506	-0.61166
9	28546236	29513467	746	-1.20547
9	29514346	30884741	1029	-1.01625
9	30887171	31619572	521	-1.18967
9	31621899	32434451	567	-0.5016
9	32435216	36620421	3091	-0.2101
9	36621781	37088826	392	-0.3703
9	37090369	38474236	1139	0.25233
9	38474725	38643607	111	-0.04861
9	75475352	75916779	344	-0.08504
9	75917426	94049553	13960	-0.30134
9	94051116	114899419	16247	0.03622
9	114901367	115414523	393	0.29509
9	115415515	123552108	6713	0.0151
9	123552987	123667679	95	0.8669
9	123669961	130910634	5739	0.04438
9	130911611	131109311	128	0.68094
9	131110614	132432591	928	-0.03323
9	132433623	132662175	179	0.36535
9	133607941	134155239	429	1.56787
9	134156720	136145491	1600	0.00403
9	136146701	141131132	3621	-0.11311
10	60110	38635775	30482	0.02382
10	73554138	77488056	2868	0.3469
10	77489475	87849388	8323	0.22942
10	87856189	88729319	685	-0.31485
10	88729931	89301163	399	0.02382
10	89305522	103602275	10836	-0.2241
10	103604343	103793908	145	-1.4827
10	103798158	111514007	5958	-0.29055
10	111514657	113090283	1268	-0.17853
10	113093818	126641987	10951	-0.3361
10	126644641	126680389	32	-1.32126
10	126681125	126730267	44	-2.14939
10	126730813	127827671	857	-0.28366
10	127828624	135106312	5726	-0.4162
10	135106924	135520883	249	0.02338
11	60224	278086	101	0.17617
11	280084	1831735	992	-0.10724
11	1833061	2060638	173	-0.28292
11	2061742	2092236	26	0.15507
11	2092936	2612184	378	-0.1629
11	2612945	3253991	508	-0.02967
11	3254578	7107059	2735	0.1456
11	7107871	8050732	716	0.01819
11	8052188	8380836	279	-0.14758
11	8381955	8805587	321	-0.01669
11	8806483	16780726	6167	0.09156
11	16781594	17806214	794	-0.01439
11	17807841	18074941	226	0.09989
11	18076372	18099948	20	-0.13344
11	18100556	19843658	1308	0.02566
11	19844544	20099396	219	0.12682
11	20100955	32917714	9743	-0.00489
11	32919094	35092539	1730	0.09824
11	35094337	35096424	3	0.22585
11	35097831	38578936	2734	0.03228
11	38579862	38587084	6	0.26
11	38588525	43618805	3770	-0.0284
11	43619685	44539678	756	0.07297
11	44541270	45215285	554	-0.08405
11	45216830	45960786	611	0.02399
11	45961605	46265498	249	0.21485
11	46266348	46429740	127	-0.04067
11	46430370	48049616	1165	0.09342
11	56489065	59028395	1873	0.08299
11	59029965	59078397	36	-0.11122
11	59079234	60267187	870	0.14933
11	60267970	60963540	530	0.00531
11	60965450	61018324	41	-0.43845
11	61020112	61730446	548	-0.02353
11	61731948	63689003	1244	0.08442
11	63691000	64694874	748	-0.03809
11	64696684	64722423	23	0.22869
11	64724035	68765998	2639	0.0101
11	68767817	71150887	1838	-0.1356
11	71152230	72543032	882	0.02542
11	72544284	72810637	188	0.17592
11	72812086	73120133	244	-0.01982
11	73120722	74900537	1332	0.15172
11	74901488	75228945	259	0.00338
11	75230028	75853461	497	0.14082
11	75854313	76072517	179	-0.0775
11	76075363	76744095	517	0.09961
11	76745643	76863278	91	-0.14583
11	76864662	78571703	1262	0.12427
11	78573076	85084971	5127	-0.00596
11	85085751	87295002	1623	0.16776
11	87298876	94208091	5145	0.01837
11	94208856	96714863	1867	0.15984
11	96715976	111287800	10923	0.00917
11	111288766	112602853	1043	0.11036
11	112604121	119073971	5157	0.00936
11	119075322	119174917	67	0.21629
11	119176145	123557421	3533	-0.05312
11	123558675	124935181	1046	0.09893
11	124936469	125328322	342	-0.02778
11	125330191	126235256	669	0.07281
11	126236421	134944701	7061	-0.0456
12	147085	2149377	1561	-0.17464
12	2151085	6118801	3267	-0.33462
12	6119627	6134512	14	0.45489
12	6136192	6504792	280	-0.31434
12	6505990	9515853	1885	-0.20108
12	9516521	9731796	162	-0.30685
12	9735124	10293087	402	-0.12755
12	10295989	10568076	184	-0.24961
12	10569623	10590426	18	-0.83628
12	10592747	22710275	9190	-0.26408
12	22712393	29719696	5509	0.06586
12	29720506	29760457	33	-0.12479
12	29761750	31035761	977	-0.02239
12	31037361	31364335	256	-0.14162
12	45913101	46834200	668	0.12139
12	46835644	47102425	188	0.24084
12	47103242	50183381	2210	0.11765
12	50184036	50622390	319	-0.00974
12	50623578	52207843	1080	0.10318
12	52208514	53518370	1021	-0.00949
12	53519891	57578656	2811	0.11423
12	57579606	57633910	38	-0.20316
12	57634952	58591970	666	0.12543
12	58593611	62613501	2927	0.01012
12	62615347	62657011	35	0.24223
12	62658368	69428459	5252	0.03725
12	69429512	69439951	10	-0.19514
12	69441323	72388223	2271	0.10193
12	72389157	72409729	18	0.30861
12	72410917	91560313	14355	0.01051
12	91561271	94633726	2430	0.12647
12	94634589	102516272	6011	0.02374
12	102516792	102543880	13	0.41634
12	102544978	102949641	312	0.17245
12	102950958	109054373	4858	0.05976
12	109055116	109138517	68	0.18519
12	109139545	110330325	875	-0.00926
12	110331196	111170270	597	0.1107
12	111171773	111888754	549	-0.02328
12	111889556	113680488	1303	0.09327
12	113681885	115631157	1593	-0.04265
12	115631708	115636304	4	-0.28288
12	115637467	121972442	4986	0.02061
12	121972927	121977382	4	-1.05721
12	124738394	125110279	290	-0.11895
12	125111791	128069446	2360	0.00227
12	128071296	130985162	2355	-0.1064
12	130987227	132630158	1241	0.00179
12	133238412	133779052	360	0.08157
13	19020199	19442883	188	-0.11418
13	19444881	20795525	914	-0.23019
13	20796279	20841083	39	-0.55975
13	20842366	32805502	9340	-0.29304
13	32806488	33283246	365	-0.17882
13	33284637	35513684	1815	-0.32426
13	35514301	35708428	142	-0.11487
13	35709328	38517573	2239	-0.28797
13	38518924	38917153	261	-0.17809
13	38918323	41234349	1869	-0.30655
13	41235283	43172959	1415	-0.17937
13	43173553	45648733	2010	-0.29317
13	45650247	45828744	142	-0.11626
13	45829845	50511005	3564	-0.22537
13	50512093	50557692	33	-0.00924
13	50558491	53381500	2183	-0.18688
13	53382722	56151443	2145	-0.28752
13	56158435	56180697	14	-0.04422
13	56182344	73931290	13605	-0.2433
13	73932427	74857775	775	-0.35038
13	74859489	74865642	7	-0.57862
13	74867549	81089083	4841	-0.2563
13	81098373	81109082	10	1.20579
13	81109867	81121521	7	-0.40968
13	81122160	81469754	250	1.29271
13	81472378	90437811	6688	-0.26047
13	90438951	91394837	741	1.18399
13	91396219	92430604	843	1.29379
13	92431043	92475453	38	1.03184
13	92476671	92941917	373	-0.24445
13	92951474	93337699	317	1.24959
13	93352971	93849259	384	-0.30046
13	93853174	94022319	142	1.46572
13	94024086	103765907	7790	-0.2651
13	103766927	103775414	5	0.34722
13	103775997	108499217	3898	-0.3422
13	108501008	108660947	110	1.43975
13	108662112	112000502	2675	-0.28185
13	113060239	113071268	7	0.18261
13	114950351	115107520	120	0.0353
14	19057587	19416105	138	-0.07759
14	19418634	20386586	592	0.0962
14	20387817	22093518	1267	-0.20913
14	22094919	23001856	707	-0.09254
14	23003038	23207920	140	-0.22981
14	23209245	23812074	450	0.12865
14	23812551	31002569	5463	-0.2607
14	31003851	32751669	1275	-0.15034
14	32752630	34265257	1249	-0.27424
14	34266096	34271880	6	-1.10159
14	34272529	37592433	2492	-0.18649
14	37594474	37795480	140	-0.03705
14	37798159	49956651	8721	-0.242
14	49957525	49964213	7	-0.53246
14	49965816	51197622	926	-0.17231
14	51198861	54649562	2658	-0.28511
14	54650023	56139631	1186	-0.17802
14	56139991	58634066	1926	-0.28505
14	58635035	59102110	356	-0.13797
14	59103197	66754163	5929	-0.25634
14	66755512	66898269	109	-0.78881
14	66901334	67417060	348	-0.19076
14	67418472	67607764	145	0.1349
14	67609439	67851012	184	-0.1066
14	67851524	68057412	174	-0.34756
14	68059371	68871380	645	-0.16311
14	68872477	72246824	2660	-0.26739
14	72249568	72307783	40	-0.10795
14	72316204	73408447	899	-0.32632
14	73409423	74674957	908	-0.20116
14	74676101	75104732	340	-0.37499
14	75105770	76752901	1346	-0.22614
14	76754166	77814169	857	-0.35034
14	77815246	77908133	71	-0.03573
14	77909409	81205479	2700	-0.29787
14	81206538	82791515	1272	-0.17891
14	82792455	91127989	6653	-0.32246
14	91129667	92844859	1321	-0.20598
14	92845928	93594466	596	-0.38491
14	93595568	94177640	451	-0.22523
14	94179437	94612528	365	-0.47849
14	94619289	94828199	175	-0.21494
14	94830270	95470016	527	-0.42731
14	95472496	97026059	1294	-0.29128
14	97027185	97631240	518	0.05816
14	97632243	100044862	2043	-0.39898
14	100045622	101236571	945	-0.24738
14	101237084	101727095	408	-0.36105
14	101728063	104156736	1795	-0.23474
14	104158778	106433261	1543	-0.37876
14	106435033	106792336	274	-0.10011
14	106793677	106830913	30	-0.57884
14	106831928	107288643	363	-0.13953
15	20045295	20186269	48	-0.08391
15	20187915	20233588	33	-0.3602
15	20248588	20279796	25	0.05062
15	20286903	20377534	20	-0.37565
15	20378467	20831055	198	-0.0773
15	21216461	21239551	16	-0.40935
15	21240320	21382689	46	-0.08302
15	22647927	22698865	31	-0.29059
15	22699661	24679892	1311	-0.01878
15	24680729	24721448	36	-0.2684
15	24723158	25916819	918	-0.07385
15	25917630	26050692	116	-0.23431
15	26052201	27193015	900	-0.0782
15	27193592	27204619	11	0.24806
15	29396282	29435656	36	-0.26765
15	29436561	31498953	1493	-0.03419
15	31500036	31819674	261	-0.14518
15	31820869	34024866	1675	-0.03774
15	34026400	34727605	513	0.10041
15	34728702	34918610	135	0.30061
15	34919349	35398565	387	0.15614
15	35399130	40523925	4003	0.0549
15	40525099	40596894	65	-0.14757
15	40598343	41041754	309	0.09065
15	41043017	41255750	149	-0.05089
15	41256646	42108932	564	0.09033
15	42110438	42115865	6	-0.46912
15	42117155	42452457	280	-0.02131
15	42453569	45297747	2021	0.11348
15	45298582	48869168	2799	-0.019
15	48870019	52761951	2896	0.13066
15	52770986	55170494	1811	-0.00451
15	55171314	59362778	3123	0.12586
15	59367570	63207246	3112	0.01091
15	63211297	64975346	1355	0.13024
15	64976634	65824433	593	0.01895
15	65825730	65841517	11	0.31681
15	65842276	68488564	2091	0.08214
15	68490227	72057382	2894	-0.02291
15	72058235	72070484	10	0.40854
15	72071287	73157440	801	0.08359
15	73159047	74741983	1244	-0.02347
15	74742940	75089986	257	0.07779
15	75091754	75095988	5	-0.55313
15	75096685	75492216	265	0.00568
15	75493234	75532255	30	-0.21985
15	75533520	76755089	798	0.05374
15	76756217	76964810	125	-0.21602
15	76965982	77177742	134	0.15789
15	77186261	77515655	260	0.00947
15	77517049	77767933	180	0.12023
15	77768929	79923542	1658	-0.01543
15	79925019	82905139	2278	0.08738
15	82906861	82926104	14	-0.33097
15	82943956	83314233	188	0.17345
15	83315260	83341529	20	-0.20336
15	83342576	86292286	2057	0.0723
15	86294215	86321698	24	-0.4225
15	86322654	86999872	560	-0.0667
15	87000544	87012843	7	0.32392
15	87013558	89532010	1990	-0.0066
15	89533114	89842819	239	0.12519
15	89843706	90832237	740	0.00459
15	90840747	92150866	996	0.1148
15	92151857	94465880	1844	0.00548
15	94467559	94471755	5	0.43352
15	94473302	94859269	304	-0.04051
15	94860421	97283933	2024	0.06074
15	97284692	97322099	33	-0.14135
15	97323620	100293973	2381	-0.01826
15	100294532	100452146	111	0.2869
15	100455130	102103155	1313	-0.03681
15	102104909	102384843	198	0.14516
15	102385538	102503087	66	0.40244
16	71631	147700	56	0.00376
16	148313	306376	101	0.17777
16	309207	674568	233	-0.02865
16	676030	850167	119	-0.1834
16	851432	1002389	112	-0.05747
16	1004971	1600800	394	-0.20355
16	1601867	1776234	137	-5e-05
16	1778246	1850415	49	-0.2159
16	1851741	1940826	66	0.05873
16	1943078	2405986	297	-0.12777
16	2407069	2471164	46	0.18763
16	2472683	3150064	478	-0.07286
16	3151460	4029108	656	0.03087
16	4029984	4037594	8	-0.41277
16	4038964	4327021	220	-0.007
16	4328799	4468985	89	-0.16671
16	4470422	4560404	72	0.11463
16	4560995	8016978	2761	-0.03517
16	8018071	9594571	1213	0.07842
16	9595536	9597626	3	0.43602
16	9599035	10941520	1044	0.02073
16	10943880	11256855	267	0.12323
16	11257948	20543838	6977	0.01178
16	20544355	21038660	386	0.16226
16	21039222	23599900	1848	0.04729
16	23600675	23921850	253	0.1626
16	23922299	25822132	1521	0.06103
16	25823711	27335615	1245	-0.03973
16	27337416	27350067	12	-0.86157
16	27351608	28120912	633	-0.09653
16	28122021	28321113	151	0.01078
16	28322598	28532098	82	-0.20368
16	28532937	32730101	2306	-0.01409
16	32730834	32966798	82	-0.24723
16	32969293	33373593	161	-0.05887
16	33375321	33638884	136	0.12741
16	46781365	46855163	55	-0.27323
16	46855585	47363254	378	0.12412
16	47366291	49301160	1512	0.01992
16	49302366	49904271	516	-0.08777
16	49905492	50177012	214	0.03082
16	50178357	50275116	72	0.18298
16	50276624	54961115	3854	-0.04089
16	54964743	54972352	7	-0.58775
16	54973303	55315248	291	-0.07019
16	55316646	57392961	1692	0.04808
16	57394233	57407136	13	-0.29494
16	57409284	66568428	7318	-0.03173
16	66569235	66874677	231	0.08872
16	66875649	66892957	15	-0.2374
16	66893497	68042314	848	-0.00593
16	68043532	68263132	148	0.13225
16	68264000	68905419	487	0.01209
16	68907646	69957610	780	0.13526
16	69959198	70553786	358	-0.00296
16	70554655	70677688	92	0.17062
16	70678522	71647377	787	0.00682
16	71648360	72557395	702	0.1106
16	72558943	74604877	1627	-0.05076
16	74605807	75532540	692	0.05712
16	75533721	75577843	35	0.3785
16	75579199	78384926	2270	0.00786
16	78386255	79393939	867	0.19533
16	79395021	80394371	852	0.3256
16	80395397	81369838	785	0.22508
16	81371715	81401321	22	0.38328
16	81401848	85406222	3289	0.23971
16	85407260	85961706	427	0.09549
16	85962741	88626637	2091	-0.04982
16	88627518	88697738	58	0.38486
16	88698516	88858321	115	0.14153
16	88860012	89267274	306	-0.0859
16	89269722	89336320	45	0.23175
16	89336949	90111268	533	0.00595
16	90112972	90285773	49	0.23381
17	404	2262682	1580	-0.34627
17	2263662	2325204	51	-0.51821
17	2326603	2635206	218	-0.24339
17	2637489	2871161	177	-0.4366
17	2873798	5045090	1588	-0.3077
17	5045745	5068162	21	0.01913
17	5069595	5660320	457	-0.26128
17	5661888	6620997	809	-0.38125
17	6622837	7039711	294	-0.20783
17	7040363	7388519	246	-0.39284
17	7389688	8596456	937	-0.26654
17	8597676	9701321	906	-0.39066
17	9702144	9999352	255	-0.50943
17	10000882	11725956	1449	-0.39958
17	11726888	12073569	277	-0.23891
17	12074840	12843414	622	-0.36674
17	12844271	12920827	68	-0.56346
17	12922348	15586343	2198	-0.31105
17	15588191	16264378	512	-0.20737
17	16265274	16401746	101	-0.33873
17	16403238	16825844	318	-0.19762
17	16827406	19810029	2287	-0.32384
17	19811833	20343138	420	-0.2225
17	20344874	20398371	42	-0.63654
17	20400188	20618944	148	-0.335
17	20619511	21104621	375	-0.19483
17	21106284	21303056	154	-0.46099
17	21304298	21324103	14	-0.87342
17	21327277	21511891	149	-0.36374
17	21913332	22017045	81	-0.41041
17	25352913	26892339	1147	0.09084
17	26894714	27272663	287	0.34484
17	27273322	32937490	4314	0.07259
17	32938119	33194600	224	-0.06381
17	33195930	33764133	418	0.07973
17	33765875	34052231	222	0.22152
17	34052890	34475363	336	0.06927
17	34814594	35308258	405	-0.0255
17	35309986	36038774	590	0.10716
17	36388059	37241783	574	-0.01137
17	37242315	37400984	119	-0.13265
17	37401721	39641050	1695	0.0723
17	39642659	40345150	516	-0.03433
17	41616687	41797794	143	-0.07894
17	41799106	42828783	750	0.03043
17	42829327	42857661	22	-0.32987
17	42858162	44120854	957	-0.00788
17	44122565	44165122	36	0.18203
17	44166291	44198240	28	0.51765
17	44199693	44414102	153	0.19406
17	44416852	44558365	117	-0.3777
17	44559932	44650486	59	-0.00862
17	44652005	44780004	107	-0.41147
17	44782156	45114973	269	0.01595
17	45117006	46758188	1271	0.11961
17	46759536	47705318	710	0.01361
17	47705599	47920128	174	0.12477
17	47920486	48298006	300	-0.07273
17	48299373	48336875	28	0.31568
17	48337843	49000412	530	0.0052
17	49001668	49632019	474	0.11259
17	49632712	49665290	21	-0.12975
17	49666393	53973294	3322	0.02298
17	53974920	53992663	12	-0.36924
17	53993647	59320023	4135	0.08722
17	59321040	59600419	230	-0.06468
17	59602229	60366702	554	0.0973
17	60367792	60687589	228	0.21036
17	60688185	60958660	210	-0.01162
17	60960562	61503991	428	0.16165
17	61504349	61558479	42	-0.1234
17	61560004	61896099	266	0.12095
17	61897300	69261888	5915	0.00824
17	69263196	70842735	1345	-0.09591
17	70843660	70847654	5	0.22525
17	70849550	71383432	426	-0.02607
17	71384512	72430303	873	-0.13352
17	72431418	76770065	3287	5e-05
17	77724636	81060000	2433	-0.02733
18	15050	4024546	2912	0.37129
18	4025218	7313530	2500	0.20871
18	7315596	7476737	123	-0.09997
18	7478417	8813744	1059	0.22765
18	8814502	10795193	1515	0.35066
18	10796392	14396746	2500	0.03026
18	14397859	15376576	531	-0.07416
18	19502486	21343166	1366	0.23564
18	21343608	21525557	154	-0.01819
18	21526467	22044583	391	0.16686
18	22045727	22402619	293	0.3914
18	22403760	23617665	998	0.55441
18	23618501	24561830	729	0.35854
18	24562669	24910154	260	0.74982
18	24911594	25078475	146	0.49672
18	25079096	34818924	7454	0.21479
18	34820212	35122086	247	0.05358
18	35123210	37013855	1511	0.18333
18	37015286	37210869	153	-0.12872
18	37211702	38064985	690	0.29036
18	38066565	39422887	1114	0.18941
18	39424245	39588199	144	0.48393
18	39588946	52993133	10535	-0.28401
18	52994253	53693278	578	-0.18248
18	53694745	73081285	15482	-0.28867
18	73081994	73618957	453	-0.39068
18	73620230	73636662	16	-0.07096
18	73638277	77686420	3212	-0.36687
18	77687044	78014850	251	-0.18527
19	69411	166928	62	0.42257
19	168511	397026	108	0.05628
19	397899	3642506	2325	-0.12047
19	3643801	3697954	42	-0.27809
19	3699558	7891201	3118	-0.07373
19	7892643	8002463	87	-0.27545
19	8003966	11666224	2568	-0.03963
19	11667745	12041184	289	0.09314
19	12042296	19908835	5903	-0.03676
19	19909777	20594117	404	0.07077
19	20595764	20715880	59	-0.30236
19	30385811	30550292	128	0.12323
19	30551009	32644553	1805	-0.07433
19	32646127	33429292	628	0.03421
19	33432076	34360232	746	-0.13995
19	34360958	35484500	881	0.06562
19	35485217	40018151	3426	-0.03945
19	40019127	40148045	92	0.19162
19	40149254	45266537	3907	0.03518
19	45267099	45325444	41	-0.16255
19	45326873	51966264	4874	-0.01767
19	51967736	52664215	578	0.09181
19	52665362	58638880	4576	-0.03556
19	58640163	59107773	354	0.10932
20	60373	170869	73	0.03588
20	175203	795562	495	-0.17968
20	797041	969656	143	-0.30287
20	970301	986272	15	-0.63944
20	987347	1560196	465	-0.19955
20	1561227	2344666	644	-0.349
20	2346210	3458457	851	-0.23646
20	3460226	3630563	134	-0.12766
20	3632312	3869878	173	-0.33642
20	3870958	6429050	1997	-0.20938
20	6429917	14133411	6227	-0.31589
20	14134598	14146334	9	0.10724
20	14147409	17592055	2749	-0.34829
20	17593506	17638869	42	-0.55819
20	17640985	19184405	1140	-0.27345
20	19186184	20590904	1161	-0.396
20	20592013	23983923	2595	-0.29531
20	23985373	24933385	754	-0.40963
20	24935698	25614533	499	-0.30471
20	25615232	26141351	203	-0.19065
20	26141977	26255546	79	0.00393
20	29420353	29568920	65	-0.2434
20	31096918	31290423	141	-0.08443
20	31291508	31459987	116	0.12155
20	31463023	32063025	450	-0.00346
20	32064190	32140451	41	0.27719
20	32141539	33562389	1030	0.08273
20	33564092	33594312	24	-0.17604
20	33596020	36331319	1874	0.03697
20	36331779	36739327	340	0.14891
20	36740771	39613534	2340	0.04387
20	39615191	39913381	230	0.15757
20	39913834	41205788	1045	0.03675
20	41207012	41241089	30	-0.43118
20	41242821	42695762	1140	-0.00767
20	42696999	42758737	52	-0.1613
20	42759555	46733584	3059	0.06291
20	46734565	47087379	297	-0.07072
20	47089204	49752499	1973	0.05048
20	49754047	49772728	16	0.18018
20	49773923	57593339	6257	-0.00818
20	57594901	57748304	132	0.11616
20	57749271	61739896	3129	-0.07426
20	61740864	62338362	408	-0.17744
20	62341907	62962418	403	0.0251
21	15282942	15715068	265	0.09392
21	15716094	16210895	383	0.22203
21	16212002	17204031	805	0.07356
21	17205782	20391881	2316	-0.02702
21	20393087	20395085	3	-0.65431
21	20396229	25505008	3900	0.01479
21	25506230	30036828	3548	0.17381
21	30038783	31463455	1168	0.35772
21	31464055	33856404	1919	0.18535
21	33857894	40380490	5296	0.29127
21	40382178	40391516	9	0.58137
21	40392482	41368981	783	0.3724
21	41369678	43781101	1922	0.15629
21	43781594	43807026	20	-0.05201
21	43807694	45697045	1346	0.23749
21	45699185	45771070	50	-0.08452
21	45772572	47648272	1413	0.19203
21	47650130	48109178	334	0.39499
22	16980176	17300842	168	0.84717
22	17304207	18943974	1074	0.23314
22	18945020	20472689	1111	0.98684
22	20718183	21460598	525	1.13692
22	21461754	21737377	132	0.43863
22	21738736	21914571	98	0.96504
22	21918791	22576422	468	1.40335
22	22577885	22685781	42	0.80214
22	22691459	22978865	213	1.41289
22	22998127	23632036	502	1.68303
22	23632952	27578952	3178	-0.26525
22	27579471	28526696	804	-0.39017
22	28527889	29455820	667	-0.15031
22	29456743	33351011	3082	-0.29713
22	33351384	34474151	956	-0.45389
22	34475873	40438526	4744	-0.3343
22	40439851	42237858	1391	-0.2332
22	42239527	50731095	6846	-0.40571
22	50732393	51237712	332	-0.23557
X	3742732	3853418	81	0.1368
X	3855346	10674755	5551	-0.3595
X	10675652	17493735	5368	-0.24277
X	17494531	20159769	2152	-0.38663
X	20161012	20347559	148	-0.21012
X	20348970	23354718	2248	-0.31267
X	23356146	24246641	636	-0.20192
X	24247209	33574354	7168	-0.31046
X	33575021	33864012	206	-0.1064
X	33865056	36726403	2058	-0.3106
X	36727849	36814761	74	-0.4918
X	36816040	39260348	1895	-0.25627
X	39261824	40514252	1026	-0.38398
X	40515134	51416170	7661	-0.28162
X	51416951	51462672	42	-0.59029
X	64951731	65733125	450	-0.12039
X	65734460	68198676	1530	-0.27993
X	68199649	68544274	282	-0.43708
X	68545656	71992299	2350	-0.26166
X	71994995	72232079	148	-0.47276
X	72233109	72295590	26	0.04552
X	72296752	93311462	12914	-0.24236
X	93312709	93328883	14	-0.6116
X	93330143	102264289	6227	-0.28785
X	102265718	102884763	456	-0.1539
X	102885322	108806388	4292	-0.28412
X	108807067	110128419	1002	-0.17833
X	110129842	112910284	2043	-0.29645
X	112911173	114397756	1083	-0.03253
X	114399321	115066253	477	-0.34165
X	115070332	131714429	11650	-0.23189
X	131715700	133055719	1084	-0.38457
X	133057073	134851993	1403	-0.23372
X	134852592	134968405	65	-0.64091
X	134973743	136302929	1048	-0.18342
X	136303722	151126432	10860	-0.30622
X	151127827	151626855	358	-0.13991
X	151631656	153888058	1543	-0.2979
X	153892043	155254115	884	-0.1033
Y	2650810	2908494	180	0.19937
Y	2909009	6085126	2173	-0.18841
Y	6085996	6400632	228	0.17498
Y	6406039	6615971	154	-0.24336
Y	15983617	16111360	81	-0.1374
Y	16111989	28659703	8339	0.18094
