# Supplementary material for: Comprehensive, integrated, and phased whole-genome analysis of the primary ENCODE cell line K562
Source: HighWire-hosted journal article supplement (doi:10.1101/gr.234948.118), 2019-02-08
Supplement: Supplemental_Table_S1.xlsx [file Supplemental_Table_S1.xlsx]

## Sheet: Sheet1
Table S1. Comparison of K562 Karyotype with Those Previously Published
	Published K562 Karyotype Data
Chromosome	Gribble et al. 2000	Naumann et al. 2001	Selden et al. 1983	Wu et al. 1995
chr1	Supported	Supported	Supported	Supported
chr2	Different	Supported	Supported	Supported
chr3	Supported	Supported	Supported	Supported
chr4	Supported	Supported	Different	Supported
chr5	Supported	Supported	Supported	Supported
chr6	Supported	Supported	Supported	Supported
chr7	Supported	Different	Different	Supported
chr8	Supported	Supported	Supported	Supported
chr9	Supported	Supported	Supported	Different
chr10	Supported	Different	Different	Different
chr11	Different	Supported	Supported	Supported
chr12	Supported	Different	Different	Different
chr13	Supported	Supported	Supported	Supported
chr14	Supported	Supported	Supported	Different
chr15	Supported	Supported	Different	Supported
chr16	Different	Supported	Supported	Supported
chr17	Supported	Supported	Supported	Supported
chr18	Supported	Different	Supported	Different
chr19	Supported	Supported	Supported	Supported
chr20	Supported	Supported	Supported	Supported
chr21	Supported	Different	Different	Different
chr22	Supported	Supported	Supported	Supported
chrX	Supported	Supported	Supported	Different
