# Supplementary material for: Comprehensive, integrated, and phased whole-genome analysis of the primary ENCODE cell line K562
Source: HighWire-hosted journal article supplement (doi:10.1101/gr.234948.118), 2019-02-08
Supplement: Supplemental_Table_S2.xlsx [file Supplemental_Table_S2.xlsx]

## Sheet: Table S1
hg19 reference; 0-based genomic coordinate counting
Table S2. Ploidy or Copy Number (CN) by Chromosome Segments in K562;
Chromosome	Start	End	Copy Number	Size
chr1	0	55265000	CN4	55265000
chr1	55265000	107320000	CN3	52055000
chr1	107320000	121490000	CN4	14170000
chr1	142530000	162350000	CN3	19820000
chr1	162350000	248910000	CN4	86560000
chr2	0	149340000	CN3	149340000
chr2	149340000	188700000	CN4	39360000
chr2	188700000	243190000	CN2	54490000
chr3	0	48230000	CN4	48230000
chr3	48230000	138280000	CN2	90050000
chr3	138280000	197970000	CN3	59690000
chr4	0	160490000	CN3	160490000
chr4	160490000	163620000	CN1	3130000
chr4	163620000	191050000	CN3	27430000
chr5	0	46410000	CN4	46410000
chr5	49400000	180910000	CN3	131510000
chr6	0	28480000	CN4	28480000
chr6	28480000	28700000	CN2	220000
chr6	28700000	33380000	CN1	4680000
chr6	33380000	33450000	CN2	70000
chr6	33450000	51740000	CN4	18290000
chr6	51740000	135740000	CN3	84000000
chr6	135740000	171060000	CN4	35320000
chr7	0	58060000	CN3	58060000
chr7	61050000	104610000	CN4	43560000
chr7	104610000	159130000	CN5	54520000
chr8	0	146310000	CN3	146310000
chr9	0	20750000	CN2	20750000
chr9	20750000	26590000	CN0	5840000
chr9	26590000	28560000	CN1	1970000
chr9	28560000	31620000	CN0	3060000
chr9	31620000	32240000	CN1	620000
chr9	32240000	37090000	CN2	4850000
chr9	37090000	38430000	CN4	1340000
chr9	38430000	38830000	CN3	400000
chr9	38830000	39190000	CN2	360000
chr9	39190000	41900000	CN1	2710000
chr9	41900000	94080000	CN2	52180000
chr9	94080000	141160000	CN3	47080000
chr10	0	39160000	CN3	39160000
chr10	42350000	87850000	CN4	45500000
chr10	87850000	135530000	CN2	47680000
chr11	0	134950000	CN3	134950000
chr12	0	22710000	CN2	22710000
chr12	22710000	133850000	CN3	111140000
chr13	0	115110000	CN2	115110000
chr14	0	107290000	CN2	107290000
chr15	0	102530000	CN3	102530000
chr16	0	78260000	CN3	78260000
chr16	78260000	85640000	CN4	7380000
chr16	85640000	90300000	CN3	4660000
chr17	0	22270000	CN2	22270000
chr17	25260000	81200000	CN3	55940000
chr18	0	10860000	CN4	10860000
chr18	10860000	19500000	CN3	8640000
chr18	19500000	22400000	CN4	2900000
chr18	22400000	25090000	CN5	2690000
chr18	25090000	39580000	CN3	14490000
chr18	39580000	78020000	CN2	38440000
chr19	0	59120000	CN3	59120000
chr20	0	26320000	CN2	26320000
chr20	29410000	62970000	CN3	33560000
chr21	0	25500000	CN3	25500000
chr21	25500000	48120000	CN4	22620000
chr22	0	51250000	CN2	51250000
chrX	0	155270000	CN2	155270000
