# Supplementary material for: Comprehensive, integrated, and phased whole-genome analysis of the primary ENCODE cell line K562
Source: HighWire-hosted journal article supplement (doi:10.1101/gr.234948.118), 2019-02-08
Supplement: Supplemental_Table_S3.xlsx [file Supplemental_Table_S3.xlsx]

## Sheet: aCGH
Table S3. K562 CGH Comparisons with Previously Published CGH
	Published K562 CGH Data
Chromome	Gribble et al. 2000	Naumann et al. 2001
chr1	Supported	Supported
chr2	N/A	Supported
chr3	Supported	Supported
chr4	N/A	Supported
chr5	Supported	Supported
chr6	Supported	Supported
chr7	Different	Supported
chr8	N/A	Supported
chr9	Supported	Supported
chr10	Different	Supported
chr11	N/A	Different
chr12	Supported	Supported
chr13	Supported	Supported
chr14	N/A	Supported
chr15	N/A	Supported
chr16	N/A	Supported
chr17	Supported	Supported
chr18	Supported	Supported
chr19	N/A	Supported
chr20	Different	Supported
chr21	Supported	Supported
chr22	Supported	Supported
chrX	N/A	Supported *
