# Supplementary material for: Comprehensive, integrated, and phased whole-genome analysis of the primary ENCODE cell line K562
Source: HighWire-hosted journal article supplement (doi:10.1101/gr.234948.118), 2019-02-08
Supplement: Supplemental_Table_S4.xlsx [file Supplemental_Table_S4.xlsx]

## Sheet: K562.LOH.final
hg19 reference; 0-based genomic coordinate counting
Table S4. Loss of Heterozygosity Regions
Chromosome	Start	End
chr2	187240000	187320000
chr2	187360000	188080000
chr2	188120000	188760000
chr2	188800000	189120000
chr2	189360000	189440000
chr2	189600000	189840000
chr2	189880000	190680000
chr2	190760000	191040000
chr2	191120000	192200000
chr2	192240000	192560000
chr2	192640000	192760000
chr2	192800000	193480000
chr2	193600000	193760000
chr2	194200000	194280000
chr2	194440000	194760000
chr2	194840000	195440000
chr2	195480000	196720000
chr2	196880000	197320000
chr2	197440000	197640000
chr2	197760000	198240000
chr2	198480000	200320000
chr2	200440000	200880000
chr2	201000000	202360000
chr2	202440000	202480000
chr2	202520000	203480000
chr2	203640000	204280000
chr2	204400000	204480000
chr2	204560000	204840000
chr2	205000000	205640000
chr2	205760000	206840000
chr2	206920000	207120000
chr2	207680000	207720000
chr2	207840000	208680000
chr2	208800000	209400000
chr2	209440000	209520000
chr2	209600000	209760000
chr2	210120000	210240000
chr2	210320000	210400000
chr2	210440000	210480000
chr2	210600000	210800000
chr2	210840000	211080000
chr2	211120000	211400000
chr2	211520000	212200000
chr2	212280000	212440000
chr2	212480000	213320000
chr2	213360000	213560000
chr2	213640000	214040000
chr2	214160000	214280000
chr2	214560000	214840000
chr2	214880000	216360000
chr2	216400000	216680000
chr2	216760000	217200000
chr2	217280000	217520000
chr2	217560000	217760000
chr2	217800000	217960000
chr2	218080000	218400000
chr2	218480000	218720000
chr2	218760000	219520000
chr2	219680000	219840000
chr2	219880000	220160000
chr2	220200000	220520000
chr2	220600000	220760000
chr2	220800000	221360000
chr2	221440000	221560000
chr2	221600000	221720000
chr2	221760000	221960000
chr2	222000000	222320000
chr2	222360000	222680000
chr2	222760000	223120000
chr2	223360000	224040000
chr2	224080000	224280000
chr2	224360000	224400000
chr2	224560000	224680000
chr2	224720000	225040000
chr2	225080000	225160000
chr2	225240000	225680000
chr2	225840000	226320000
chr2	226400000	226680000
chr2	226800000	226920000
chr2	227000000	227360000
chr2	227480000	227560000
chr2	227960000	228000000
chr2	228040000	229280000
chr2	229320000	229800000
chr2	229840000	231080000
chr2	231240000	231440000
chr2	231480000	231560000
chr2	231720000	231920000
chr2	232400000	232560000
chr2	232720000	232800000
chr2	232840000	233040000
chr2	233200000	233560000
chr2	233680000	234120000
chr2	234200000	234320000
chr2	234440000	234480000
chr2	234680000	235040000
chr2	235080000	235160000
chr2	235200000	235360000
chr2	235400000	235560000
chr2	235600000	236280000
chr2	236320000	236840000
chr2	236880000	237000000
chr2	237160000	237200000
chr2	237440000	237600000
chr2	237680000	237720000
chr2	237760000	238000000
chr2	238200000	238240000
chr2	238280000	238320000
chr2	238560000	238600000
chr2	238760000	239120000
chr2	239200000	239240000
chr2	239280000	239520000
chr2	239600000	240360000
chr2	240400000	240520000
chr2	240560000	240880000
chr2	240960000	242000000
chr2	242080000	242520000
chr2	242600000	242680000
chr2	242960000	243040000
chr3	40000	560000
chr3	680000	1760000
chr3	1800000	2160000
chr3	2200000	2680000
chr3	2720000	3440000
chr3	3480000	5160000
chr3	5200000	6520000
chr3	6720000	7080000
chr3	7200000	7440000
chr3	7480000	8240000
chr3	8280000	8440000
chr3	8480000	9440000
chr3	9520000	9600000
chr3	9640000	9680000
chr3	9760000	9920000
chr3	9960000	10000000
chr3	10160000	10360000
chr3	10480000	10560000
chr3	10600000	10800000
chr3	10920000	11560000
chr3	11600000	12320000
chr3	12400000	12520000
chr3	12560000	12760000
chr3	12800000	13280000
chr3	13360000	13640000
chr3	13720000	13840000
chr3	13880000	15000000
chr3	15160000	15200000
chr3	15280000	15360000
chr3	15400000	15600000
chr3	15680000	16440000
chr3	16560000	16880000
chr3	16920000	16960000
chr3	17160000	17240000
chr3	17640000	17680000
chr3	18400000	18600000
chr3	18840000	18880000
chr3	18920000	19080000
chr3	19840000	21000000
chr3	21080000	21600000
chr3	21640000	22280000
chr3	22400000	22480000
chr3	22600000	22640000
chr3	22800000	23040000
chr3	23080000	23120000
chr3	23160000	23680000
chr3	23720000	23800000
chr3	24080000	24200000
chr3	24280000	24360000
chr3	24400000	24560000
chr3	24720000	24960000
chr3	25000000	25160000
chr3	25200000	25240000
chr3	25280000	25560000
chr3	25720000	26200000
chr3	26400000	26560000
chr3	26640000	27200000
chr3	27360000	27560000
chr3	27600000	27680000
chr3	27760000	28000000
chr3	28040000	28080000
chr3	28120000	28160000
chr3	28320000	28560000
chr3	28640000	28920000
chr3	28960000	29160000
chr3	29200000	29520000
chr3	29720000	29840000
chr3	29880000	30480000
chr3	30520000	30920000
chr3	31000000	31120000
chr3	31240000	31320000
chr3	31440000	31800000
chr3	31840000	31880000
chr3	31920000	32000000
chr3	32040000	32520000
chr3	32720000	33160000
chr3	33280000	33520000
chr3	33960000	34320000
chr3	34360000	35360000
chr3	35520000	35800000
chr3	35920000	36400000
chr3	36440000	36640000
chr3	36760000	36880000
chr3	37480000	37520000
chr3	37680000	37720000
chr3	37760000	37840000
chr3	38000000	38080000
chr3	38320000	39760000
chr3	39800000	39960000
chr3	40040000	40120000
chr3	40200000	40640000
chr3	40720000	40920000
chr3	41000000	41240000
chr3	41520000	41640000
chr3	41920000	42080000
chr3	42160000	42600000
chr3	42720000	42880000
chr3	42920000	43720000
chr3	43760000	44160000
chr3	44200000	44600000
chr3	44640000	45840000
chr3	46320000	46400000
chr3	46560000	46760000
chr3	46920000	47880000
chr3	48000000	48200000
chr3	48400000	48440000
chr3	49400000	49560000
chr3	49600000	49800000
chr3	50040000	50240000
chr3	50560000	50920000
chr3	50960000	51400000
chr3	51880000	51960000
chr3	52440000	52560000
chr3	52840000	53640000
chr3	53720000	53880000
chr3	53960000	54320000
chr3	54400000	54840000
chr3	54880000	55400000
chr3	55440000	56320000
chr3	56360000	56640000
chr3	56760000	57160000
chr3	57200000	57240000
chr3	57400000	57560000
chr3	57920000	58000000
chr3	58040000	58720000
chr3	59000000	59160000
chr3	59200000	59520000
chr3	59560000	59680000
chr3	59720000	60440000
chr3	60480000	60760000
chr3	60800000	61120000
chr3	61160000	61200000
chr3	61280000	62120000
chr3	62320000	63360000
chr3	63400000	63680000
chr3	63720000	63760000
chr3	63840000	63880000
chr3	64040000	64280000
chr3	64320000	64560000
chr3	64640000	64800000
chr3	64840000	65320000
chr3	65360000	65840000
chr3	65880000	66080000
chr3	66240000	66600000
chr3	66640000	67120000
chr3	67160000	67360000
chr3	67400000	67640000
chr3	67720000	68600000
chr3	68640000	68840000
chr3	68920000	69040000
chr3	69080000	69520000
chr3	69640000	69800000
chr3	70000000	70040000
chr3	70120000	70720000
chr3	70800000	70960000
chr3	71120000	71280000
chr3	71320000	71440000
chr3	71480000	71640000
chr3	71680000	71720000
chr3	71760000	72800000
chr3	72960000	73040000
chr3	73160000	73440000
chr3	73480000	74320000
chr3	74360000	74640000
chr3	74680000	75120000
chr3	75240000	75280000
chr3	75360000	75480000
chr3	75520000	75560000
chr3	75800000	76080000
chr3	76160000	76400000
chr3	76480000	76880000
chr3	76920000	76960000
chr3	77080000	77120000
chr3	77280000	77760000
chr3	77800000	77840000
chr3	77920000	78040000
chr3	78200000	78360000
chr3	78400000	78720000
chr3	78760000	79160000
chr3	79400000	79480000
chr3	79600000	80960000
chr3	81000000	82080000
chr3	82120000	82360000
chr3	82440000	82480000
chr3	82720000	82840000
chr3	82920000	83320000
chr3	83480000	84160000
chr3	84320000	86200000
chr3	86240000	86400000
chr3	86440000	86520000
chr3	86640000	86680000
chr3	86720000	86880000
chr3	86920000	87280000
chr3	87400000	87640000
chr3	88000000	88800000
chr3	89000000	89400000
chr3	89440000	89480000
chr3	90240000	90280000
chr3	90400000	90440000
chr3	93520000	93600000
chr3	93960000	94080000
chr3	94240000	94400000
chr3	94440000	94640000
chr3	94680000	95720000
chr3	95760000	96240000
chr3	96280000	96440000
chr3	96680000	96840000
chr3	97320000	97400000
chr3	97440000	97480000
chr3	97680000	97800000
chr3	97960000	98000000
chr3	98080000	98240000
chr3	98280000	98360000
chr3	98400000	98440000
chr3	98480000	98720000
chr3	98760000	99600000
chr3	99640000	99760000
chr3	99960000	100000000
chr3	100040000	100200000
chr3	100280000	100920000
chr3	101000000	101880000
chr3	102200000	102400000
chr3	102440000	102480000
chr3	102680000	102920000
chr3	102960000	103040000
chr3	103160000	103480000
chr3	103600000	104840000
chr3	104880000	105080000
chr3	105200000	105760000
chr3	105800000	106280000
chr3	106320000	106440000
chr3	106480000	107240000
chr3	107280000	107600000
chr3	107640000	107960000
chr3	108000000	109200000
chr3	109240000	110840000
chr3	110920000	111320000
chr3	111360000	113320000
chr3	113520000	113960000
chr3	114000000	114200000
chr3	114240000	114280000
chr3	114440000	114640000
chr3	115040000	115160000
chr3	115200000	116360000
chr3	116400000	116920000
chr3	116960000	117440000
chr3	117480000	118120000
chr3	118200000	118320000
chr3	118360000	118480000
chr3	118520000	118640000
chr3	118720000	119280000
chr3	119320000	119440000
chr3	119480000	119600000
chr3	119800000	121360000
chr3	121440000	122720000
chr3	122760000	123280000
chr3	123360000	123720000
chr3	123760000	123840000
chr3	123920000	124440000
chr3	124560000	125120000
chr3	125360000	125600000
chr3	125680000	126000000
chr3	126040000	127080000
chr3	127160000	127280000
chr3	127320000	127520000
chr3	127600000	127640000
chr3	127720000	127760000
chr3	127840000	128040000
chr3	128080000	128120000
chr3	128160000	128440000
chr3	128560000	128960000
chr3	129040000	129120000
chr3	129280000	130960000
chr3	131120000	131240000
chr3	131360000	131840000
chr3	131880000	132440000
chr3	132600000	132640000
chr3	132680000	132720000
chr3	132840000	133240000
chr3	133280000	133560000
chr3	133640000	133800000
chr3	133880000	133920000
chr3	134000000	134040000
chr3	134160000	134640000
chr3	134680000	135640000
chr3	135680000	135800000
chr3	135920000	136040000
chr3	136080000	136360000
chr3	136720000	136920000
chr3	136960000	137360000
chr3	137440000	137920000
chr3	138000000	138120000
chr3	138160000	138280000
chr3	138360000	138520000
chr3	138560000	138640000
chr3	138680000	138960000
chr3	139000000	139160000
chr3	139200000	139400000
chr3	139600000	139800000
chr3	139840000	140360000
chr3	140680000	141040000
chr3	141320000	141680000
chr3	141720000	141880000
chr3	141920000	142440000
chr3	142520000	142880000
chr3	142960000	143240000
chr3	143360000	143600000
chr3	144000000	144160000
chr3	144280000	144400000
chr3	144480000	144520000
chr3	144640000	144880000
chr3	144960000	145680000
chr3	145760000	145880000
chr3	145920000	146200000
chr3	146240000	146640000
chr3	146960000	147080000
chr3	147280000	147520000
chr3	147600000	147640000
chr3	147720000	147760000
chr3	147800000	148000000
chr3	148040000	148680000
chr3	148840000	149320000
chr3	149400000	149440000
chr3	149480000	149920000
chr3	150000000	150080000
chr3	150200000	150480000
chr3	150600000	150800000
chr3	150880000	150960000
chr3	151320000	151960000
chr3	152240000	152360000
chr3	152600000	153560000
chr3	153600000	153800000
chr3	154680000	154760000
chr3	154800000	154920000
chr3	155040000	155120000
chr3	155240000	155600000
chr3	155960000	156000000
chr3	156160000	157840000
chr3	157880000	157920000
chr3	157960000	158560000
chr3	158680000	158960000
chr3	159120000	159280000
chr3	159320000	159520000
chr3	159560000	159840000
chr3	159880000	159920000
chr3	160280000	160320000
chr3	160400000	161680000
chr3	161840000	161880000
chr3	162040000	162280000
chr3	162360000	163080000
chr3	163120000	163160000
chr3	163200000	163560000
chr3	164040000	164280000
chr3	164360000	164840000
chr3	164880000	165160000
chr3	165240000	165760000
chr3	165840000	165880000
chr3	165920000	166160000
chr3	166200000	166320000
chr3	166720000	166840000
chr3	166920000	167120000
chr3	167640000	167800000
chr3	168240000	168360000
chr3	168480000	168960000
chr3	169000000	169040000
chr3	169080000	169120000
chr3	169160000	169200000
chr3	169600000	169640000
chr3	170040000	170280000
chr3	170760000	170800000
chr3	170880000	171960000
chr3	172000000	172680000
chr3	172760000	172920000
chr3	172960000	173040000
chr3	173080000	173160000
chr3	173280000	173360000
chr3	173400000	173880000
chr3	173960000	174040000
chr3	174240000	174280000
chr3	174320000	174440000
chr3	174480000	174720000
chr3	174760000	175360000
chr3	175640000	175680000
chr3	175880000	176320000
chr3	176360000	176720000
chr3	176800000	176880000
chr3	177120000	177200000
chr3	177320000	177400000
chr3	177440000	177600000
chr3	177840000	178040000
chr3	178080000	178120000
chr3	178320000	178360000
chr3	178520000	178800000
chr3	178960000	179720000
chr3	179760000	180280000
chr3	180320000	180360000
chr3	180560000	181000000
chr3	181040000	181240000
chr3	181320000	181400000
chr3	181440000	181520000
chr3	181560000	181720000
chr3	181880000	182280000
chr3	182320000	182400000
chr3	182440000	182600000
chr3	182640000	182800000
chr3	182920000	182960000
chr3	183000000	183240000
chr3	183280000	183320000
chr3	183400000	183440000
chr3	183520000	183640000
chr3	183720000	183960000
chr3	184120000	184280000
chr3	184320000	185360000
chr3	185400000	185480000
chr3	185520000	185560000
chr3	185600000	186040000
chr3	186080000	186240000
chr3	186280000	186720000
chr3	186760000	186800000
chr3	186880000	187480000
chr3	187560000	187760000
chr3	187800000	187840000
chr3	187880000	188520000
chr3	188560000	188760000
chr3	188960000	189040000
chr3	189080000	189800000
chr3	189840000	189920000
chr3	190080000	190360000
chr3	190840000	190880000
chr3	190920000	191600000
chr3	191640000	191920000
chr3	192080000	192160000
chr3	192200000	192280000
chr3	192320000	192520000
chr3	192560000	194000000
chr3	194080000	194160000
chr3	194200000	194480000
chr3	194520000	194600000
chr3	194640000	194840000
chr3	194960000	195080000
chr3	195160000	195360000
chr3	195400000	195680000
chr3	195720000	195880000
chr3	196080000	196560000
chr3	196600000	196640000
chr3	196720000	197080000
chr3	197160000	197240000
chr3	197280000	197360000
chr3	197440000	197600000
chr3	197760000	197880000
chr4	160440000	160840000
chr4	160880000	160920000
chr4	161120000	161760000
chr4	161800000	162160000
chr4	162240000	162320000
chr4	162360000	162440000
chr4	162480000	163120000
chr4	163240000	163840000
chr4	163920000	164120000
chr4	164160000	164320000
chr9	280000	480000
chr9	520000	1520000
chr9	1640000	1800000
chr9	1920000	1960000
chr9	2040000	2360000
chr9	2400000	2760000
chr9	2840000	3280000
chr9	3360000	3480000
chr9	3560000	3600000
chr9	3640000	4840000
chr9	4960000	5040000
chr9	5320000	5560000
chr9	5680000	5720000
chr9	5800000	6000000
chr9	6040000	6480000
chr9	6520000	6560000
chr9	6600000	6800000
chr9	6840000	7240000
chr9	7280000	8280000
chr9	8440000	8480000
chr9	8680000	8720000
chr9	8760000	9360000
chr9	9520000	9840000
chr9	9880000	9920000
chr9	9960000	10840000
chr9	10880000	11920000
chr9	11960000	12800000
chr9	12840000	13360000
chr9	13440000	14080000
chr9	14120000	15240000
chr9	15280000	16120000
chr9	16160000	16200000
chr9	16240000	16520000
chr9	16560000	17040000
chr9	17280000	17760000
chr9	17800000	19400000
chr9	19440000	19480000
chr9	19520000	19600000
chr9	19720000	20040000
chr9	20080000	20360000
chr9	20440000	20760000
chr9	26560000	26800000
chr9	27080000	27240000
chr9	27320000	27960000
chr9	28000000	28560000
chr9	31640000	31960000
chr9	32040000	32120000
chr9	32240000	32480000
chr9	32680000	33000000
chr9	33080000	33360000
chr9	33400000	34200000
chr9	34360000	34440000
chr9	34520000	34600000
chr9	34640000	35000000
chr9	35120000	35280000
chr9	35520000	35720000
chr9	35800000	36560000
chr9	36640000	37640000
chr9	37680000	37760000
chr9	37800000	37840000
chr9	37880000	38560000
chr9	38600000	38800000
chr9	39000000	39040000
chr9	44080000	44240000
chr9	44760000	44880000
chr9	66760000	66800000
chr9	68160000	68240000
chr9	68280000	68320000
chr9	68960000	69000000
chr9	70960000	72640000
chr9	72840000	73160000
chr9	73200000	73320000
chr9	73360000	74800000
chr9	74880000	75160000
chr9	75520000	76800000
chr9	76920000	77000000
chr9	77040000	77360000
chr9	77400000	77560000
chr9	77640000	77760000
chr9	77800000	77960000
chr9	78040000	78680000
chr9	78720000	79120000
chr9	79160000	79320000
chr9	79400000	79600000
chr9	79680000	79720000
chr9	80040000	80080000
chr9	80200000	80240000
chr9	80280000	81000000
chr9	81120000	81440000
chr9	81560000	81960000
chr9	82240000	82560000
chr9	82600000	82840000
chr9	82920000	84040000
chr9	84080000	84360000
chr9	84440000	84480000
chr9	84840000	84960000
chr9	85120000	85240000
chr9	85280000	85320000
chr9	85600000	86360000
chr9	86400000	86480000
chr9	86520000	86600000
chr9	86760000	86840000
chr9	86920000	86960000
chr9	87080000	87120000
chr9	87240000	87320000
chr9	87400000	87520000
chr9	87560000	87720000
chr9	87800000	87960000
chr9	88000000	88240000
chr9	88360000	88400000
chr9	88640000	88960000
chr9	89000000	89440000
chr9	89480000	90080000
chr9	90120000	90640000
chr9	90760000	90920000
chr9	91080000	91160000
chr9	91200000	91320000
chr9	91440000	91880000
chr9	92000000	92080000
chr9	92160000	92320000
chr9	92440000	92520000
chr9	92760000	93280000
chr9	93320000	93480000
chr9	93520000	93760000
chr9	93800000	94120000
chr9	94160000	94200000
chr9	94320000	94360000
chr9	94400000	94520000
chr9	94560000	94720000
chr9	94920000	95360000
chr9	95400000	95440000
chr9	95480000	95800000
chr9	95840000	95920000
chr9	95960000	96160000
chr9	96240000	96280000
chr9	96320000	96480000
chr9	96520000	97080000
chr9	97120000	97160000
chr9	97280000	97680000
chr9	97760000	98600000
chr9	98840000	99120000
chr9	99800000	99840000
chr9	99880000	100080000
chr9	100160000	100320000
chr9	100480000	101640000
chr9	101720000	101880000
chr9	102000000	102200000
chr9	102280000	102360000
chr9	102600000	103160000
chr9	103320000	104000000
chr9	104120000	104240000
chr9	104440000	104560000
chr9	104640000	104880000
chr9	105040000	105200000
chr9	105320000	105920000
chr9	105960000	106080000
chr9	106320000	106760000
chr9	106800000	106840000
chr9	107080000	107280000
chr9	107440000	107520000
chr9	107560000	107600000
chr9	107640000	107760000
chr9	107800000	107880000
chr9	107920000	107960000
chr9	108120000	108440000
chr9	108600000	109080000
chr9	109120000	109560000
chr9	109600000	109640000
chr9	109800000	109840000
chr9	109880000	110000000
chr9	110040000	110160000
chr9	110200000	110240000
chr9	110320000	110560000
chr9	110680000	110760000
chr9	111000000	111080000
chr9	111120000	111680000
chr9	111720000	112200000
chr9	112240000	112360000
chr9	112400000	112560000
chr9	112600000	112880000
chr9	112920000	113400000
chr9	113440000	113880000
chr9	114440000	114760000
chr9	114840000	115400000
chr9	115440000	115840000
chr9	115880000	116000000
chr9	116120000	116160000
chr9	116320000	116560000
chr9	116680000	117120000
chr9	117160000	117280000
chr9	117360000	117400000
chr9	117480000	117640000
chr9	117720000	118280000
chr9	118520000	118680000
chr9	118760000	118800000
chr9	118840000	118960000
chr9	119000000	119320000
chr9	119480000	119560000
chr9	119600000	120280000
chr9	120400000	121000000
chr9	121160000	121240000
chr9	121320000	121480000
chr9	121520000	121560000
chr9	121680000	122680000
chr9	122720000	123080000
chr9	123120000	123200000
chr9	123280000	123520000
chr9	123600000	124440000
chr9	124520000	124600000
chr9	124640000	124760000
chr9	124880000	125040000
chr9	125120000	125280000
chr9	125440000	125880000
chr9	125920000	125960000
chr9	126040000	126400000
chr9	126720000	126760000
chr9	126800000	127280000
chr9	127320000	127360000
chr9	127400000	127680000
chr9	127960000	128160000
chr9	128200000	128640000
chr9	128720000	128960000
chr9	129040000	129560000
chr9	129600000	129960000
chr9	130040000	130360000
chr9	130520000	131160000
chr9	131200000	131240000
chr9	131280000	131800000
chr9	131840000	132080000
chr9	132160000	132440000
chr9	132520000	132560000
chr9	132600000	133080000
chr9	133200000	133400000
chr9	133600000	134480000
chr9	134640000	134800000
chr9	134840000	135000000
chr9	135080000	135120000
chr9	135160000	135360000
chr9	135440000	137040000
chr9	137080000	137200000
chr9	137240000	137520000
chr9	137560000	138600000
chr9	138640000	138680000
chr9	138800000	139000000
chr9	139040000	139160000
chr9	139200000	139280000
chr9	139360000	140400000
chr9	140680000	140800000
chr9	140960000	141040000
chr10	120000	320000
chr10	87840000	88320000
chr10	88440000	88800000
chr10	88920000	88960000
chr10	89080000	89120000
chr10	89240000	89360000
chr10	89400000	89480000
chr10	89560000	89600000
chr10	89800000	90160000
chr10	90200000	90440000
chr10	90560000	90640000
chr10	90720000	90920000
chr10	90960000	91000000
chr10	91040000	91200000
chr10	91360000	91600000
chr10	91640000	91680000
chr10	92000000	92480000
chr10	92840000	93080000
chr10	93320000	94360000
chr10	94400000	94440000
chr10	94480000	95320000
chr10	95360000	95800000
chr10	95840000	96040000
chr10	96120000	96160000
chr10	96440000	96920000
chr10	96960000	97520000
chr10	97840000	98440000
chr10	98480000	99120000
chr10	99240000	99400000
chr10	99480000	99600000
chr10	99640000	99800000
chr10	99840000	100120000
chr10	100160000	101600000
chr10	102040000	102120000
chr10	102160000	102400000
chr10	102440000	102560000
chr10	102600000	102640000
chr10	102760000	103600000
chr10	103800000	103840000
chr10	103960000	104080000
chr10	104120000	104600000
chr10	104960000	105040000
chr10	105120000	105160000
chr10	105200000	105680000
chr10	105720000	105880000
chr10	106120000	106920000
chr10	107000000	107160000
chr10	107240000	107320000
chr10	107360000	107760000
chr10	107800000	108160000
chr10	108360000	108520000
chr10	108640000	108720000
chr10	108760000	108880000
chr10	108920000	108960000
chr10	109160000	109680000
chr10	109920000	109960000
chr10	110080000	110360000
chr10	110440000	110640000
chr10	110800000	110840000
chr10	110920000	111080000
chr10	111240000	111520000
chr10	111560000	111640000
chr10	111760000	111840000
chr10	112040000	112880000
chr10	113000000	113520000
chr10	113600000	113760000
chr10	113880000	113960000
chr10	114040000	114320000
chr10	114520000	114640000
chr10	114880000	114920000
chr10	115040000	115600000
chr10	115680000	115800000
chr10	116040000	116560000
chr10	116640000	117400000
chr10	117440000	117760000
chr10	117800000	118120000
chr10	118160000	119200000
chr10	119240000	119280000
chr10	119320000	119400000
chr10	119440000	121560000
chr10	121720000	122040000
chr10	122120000	122840000
chr10	122880000	123960000
chr10	124000000	124200000
chr10	124240000	124360000
chr10	124400000	124600000
chr10	124680000	124920000
chr10	124960000	125080000
chr10	125160000	125880000
chr10	125960000	126440000
chr10	126480000	126640000
chr10	126760000	127000000
chr10	127120000	127320000
chr10	127360000	128280000
chr10	128320000	128600000
chr10	128800000	129760000
chr10	129840000	130080000
chr10	130160000	130200000
chr10	130240000	130360000
chr10	130400000	131440000
chr10	131480000	131520000
chr10	131560000	131600000
chr10	131640000	131760000
chr10	131800000	131840000
chr10	132000000	132360000
chr10	132400000	132760000
chr10	132880000	133400000
chr10	133440000	133640000
chr10	133720000	133880000
chr10	133960000	134120000
chr10	134160000	134200000
chr10	134240000	134480000
chr10	134560000	134640000
chr10	134760000	135400000
chr12	200000	400000
chr12	440000	1280000
chr12	1600000	1960000
chr12	2000000	2240000
chr12	2440000	2600000
chr12	2640000	2920000
chr12	2960000	3400000
chr12	3440000	3680000
chr12	3720000	4160000
chr12	4200000	4600000
chr12	4640000	4840000
chr12	4880000	5360000
chr12	5400000	6200000
chr12	6280000	6320000
chr12	6360000	6600000
chr12	6720000	6960000
chr12	7040000	7080000
chr12	7240000	7360000
chr12	7440000	8760000
chr12	8800000	8880000
chr12	8920000	9200000
chr12	9240000	9640000
chr12	9720000	10240000
chr12	10280000	10520000
chr12	10560000	11520000
chr12	11560000	11720000
chr12	11760000	12280000
chr12	12320000	13240000
chr12	13280000	14840000
chr12	15040000	15120000
chr12	15160000	15320000
chr12	15560000	15880000
chr12	16000000	16040000
chr12	16120000	16240000
chr12	16320000	16520000
chr12	16560000	17120000
chr12	17200000	17280000
chr12	17440000	17760000
chr12	17840000	18160000
chr12	18280000	20360000
chr12	20440000	21360000
chr12	21480000	21520000
chr12	21560000	21920000
chr12	21960000	22560000
chr12	22600000	22720000
chr12	33680000	34880000
chr12	37840000	39200000
chr13	19160000	19280000
chr13	19440000	19560000
chr13	19600000	20160000
chr13	20200000	21600000
chr13	21640000	21920000
chr13	22040000	22200000
chr13	22240000	23000000
chr13	23040000	23800000
chr13	23840000	24120000
chr13	24160000	25040000
chr13	25080000	25120000
chr13	25160000	26040000
chr13	26160000	27560000
chr13	27600000	28280000
chr13	28360000	28680000
chr13	28800000	30520000
chr13	30560000	30720000
chr13	30760000	30920000
chr13	30960000	31920000
chr13	31960000	33000000
chr13	33040000	33400000
chr13	33520000	33600000
chr13	33640000	33960000
chr13	34200000	34480000
chr13	34520000	35360000
chr13	35920000	36360000
chr13	36400000	36640000
chr13	36680000	38520000
chr13	38560000	38960000
chr13	39000000	39560000
chr13	39640000	40600000
chr13	40640000	41160000
chr13	41360000	42160000
chr13	42280000	42560000
chr13	42640000	43000000
chr13	43040000	44560000
chr13	44600000	45080000
chr13	45200000	45520000
chr13	45560000	45640000
chr13	45680000	46200000
chr13	46240000	46320000
chr13	46360000	47640000
chr13	47840000	48240000
chr13	48400000	48760000
chr13	48840000	49040000
chr13	49440000	50480000
chr13	50560000	50600000
chr13	50640000	50760000
chr13	50800000	51360000
chr13	51440000	51600000
chr13	51720000	51920000
chr13	52000000	52120000
chr13	52360000	52760000
chr13	52960000	53040000
chr13	53160000	54120000
chr13	54160000	54200000
chr13	54240000	55040000
chr13	55080000	55160000
chr13	55200000	55560000
chr13	55760000	56720000
chr13	56880000	57120000
chr13	57160000	58920000
chr13	59080000	59680000
chr13	59720000	59920000
chr13	60000000	60240000
chr13	60280000	60360000
chr13	60480000	61680000
chr13	61840000	62280000
chr13	62480000	62560000
chr13	62600000	63360000
chr13	63400000	63680000
chr13	63760000	64000000
chr13	64040000	64200000
chr13	64440000	64480000
chr13	64600000	65120000
chr13	65160000	65200000
chr13	65320000	65440000
chr13	65480000	65800000
chr13	65840000	66520000
chr13	66600000	66720000
chr13	66760000	67440000
chr13	67480000	67760000
chr13	67840000	68240000
chr13	68440000	68480000
chr13	68800000	69600000
chr13	69760000	70000000
chr13	70040000	70920000
chr13	70960000	71440000
chr13	71520000	71720000
chr13	71760000	72120000
chr13	72160000	72240000
chr13	72280000	72400000
chr13	72440000	74000000
chr13	74040000	74120000
chr13	74200000	74360000
chr13	74440000	74800000
chr13	74840000	76280000
chr13	76360000	76960000
chr13	77040000	77160000
chr13	77240000	77480000
chr13	77560000	77600000
chr13	77640000	77760000
chr13	77800000	78280000
chr13	78400000	78840000
chr13	78880000	79080000
chr13	79200000	79320000
chr13	79360000	80120000
chr13	80160000	80760000
chr13	80840000	81480000
chr13	81600000	81680000
chr13	81720000	81760000
chr13	81800000	81840000
chr13	81960000	82080000
chr13	82160000	82520000
chr13	82800000	83080000
chr13	83200000	83320000
chr13	83360000	83520000
chr13	83680000	83880000
chr13	83920000	84040000
chr13	84080000	84320000
chr13	84560000	84640000
chr13	84760000	85400000
chr13	85520000	85640000
chr13	85800000	86760000
chr13	86880000	87240000
chr13	87360000	87440000
chr13	87640000	87760000
chr13	87840000	88040000
chr13	88080000	88400000
chr13	88480000	90040000
chr13	90080000	90160000
chr13	90240000	90400000
chr13	93560000	93880000
chr13	94000000	94680000
chr13	94720000	94840000
chr13	94880000	94960000
chr13	95000000	95080000
chr13	95200000	95320000
chr13	95360000	96360000
chr13	96400000	96680000
chr13	96720000	97200000
chr13	97280000	97440000
chr13	97520000	97600000
chr13	97640000	97800000
chr13	97840000	97960000
chr13	98040000	98080000
chr13	98120000	98600000
chr13	98720000	99280000
chr13	99320000	99400000
chr13	99440000	99600000
chr13	99760000	100280000
chr13	100320000	101480000
chr13	101520000	101760000
chr13	101800000	101840000
chr13	101880000	102120000
chr13	102200000	102360000
chr13	102400000	102480000
chr13	102520000	102560000
chr13	102600000	103600000
chr13	103680000	104000000
chr13	104080000	104840000
chr13	104960000	105120000
chr13	105280000	105800000
chr13	105880000	106200000
chr13	106240000	106960000
chr13	107000000	107160000
chr13	107240000	107320000
chr13	107360000	107520000
chr13	107560000	108040000
chr13	108160000	109280000
chr13	109320000	110480000
chr13	110520000	110560000
chr13	110640000	112360000
chr13	112480000	113040000
chr13	113080000	113280000
chr13	113320000	114320000
chr13	114400000	114480000
chr13	114560000	114640000
chr13	114720000	114760000
chr13	114800000	115080000
chr14	19440000	19480000
chr14	20200000	21560000
chr14	21600000	21640000
chr14	21720000	21880000
chr14	21920000	22440000
chr14	22480000	23120000
chr14	23160000	23440000
chr14	23480000	23680000
chr14	23720000	23800000
chr14	23880000	24000000
chr14	24040000	24440000
chr14	24520000	24560000
chr14	24680000	25720000
chr14	25760000	26240000
chr14	26320000	26400000
chr14	26440000	28400000
chr14	28440000	28600000
chr14	28720000	29280000
chr14	29360000	29600000
chr14	29640000	29680000
chr14	29720000	29760000
chr14	29880000	30120000
chr14	30280000	30320000
chr14	30400000	30680000
chr14	30800000	30840000
chr14	30880000	31040000
chr14	31200000	31280000
chr14	31320000	31680000
chr14	31760000	32480000
chr14	32600000	32680000
chr14	32760000	33480000
chr14	33520000	33960000
chr14	34000000	34320000
chr14	34360000	34520000
chr14	34560000	34600000
chr14	34640000	34880000
chr14	34920000	35080000
chr14	35120000	35880000
chr14	36400000	36440000
chr14	36480000	36560000
chr14	36640000	37440000
chr14	37520000	37640000
chr14	37720000	38080000
chr14	38120000	38440000
chr14	38480000	39200000
chr14	39280000	40240000
chr14	40320000	40400000
chr14	40480000	40720000
chr14	40840000	42000000
chr14	42080000	42160000
chr14	42280000	42440000
chr14	42560000	43480000
chr14	43520000	43560000
chr14	43600000	44040000
chr14	44080000	44280000
chr14	44440000	44560000
chr14	44600000	44760000
chr14	44880000	45240000
chr14	45600000	45760000
chr14	45800000	47400000
chr14	47440000	47600000
chr14	47680000	48720000
chr14	48760000	49160000
chr14	49200000	49520000
chr14	49560000	49680000
chr14	49720000	49840000
chr14	50000000	50040000
chr14	50160000	50400000
chr14	50440000	51360000
chr14	51400000	53080000
chr14	53160000	53240000
chr14	53280000	53720000
chr14	53800000	53920000
chr14	54000000	54680000
chr14	54720000	54800000
chr14	54840000	54880000
chr14	55040000	55280000
chr14	55480000	55520000
chr14	55920000	56040000
chr14	56160000	56240000
chr14	56520000	57360000
chr14	57400000	57640000
chr14	57760000	57880000
chr14	57920000	58240000
chr14	58440000	58800000
chr14	58840000	59080000
chr14	59120000	59920000
chr14	59960000	60200000
chr14	60440000	60600000
chr14	60640000	60680000
chr14	60760000	62240000
chr14	62320000	62560000
chr14	62720000	63480000
chr14	63560000	63720000
chr14	63760000	63800000
chr14	64240000	64440000
chr14	64480000	64560000
chr14	64600000	65160000
chr14	65280000	65400000
chr14	65560000	65680000
chr14	65760000	66640000
chr14	67880000	67920000
chr14	67960000	68280000
chr14	68400000	68440000
chr14	68600000	68680000
chr14	68720000	69520000
chr14	69640000	69840000
chr14	69960000	70120000
chr14	70200000	70400000
chr14	70480000	70920000
chr14	71080000	71440000
chr14	71560000	71640000
chr14	72000000	72120000
chr14	72160000	72760000
chr14	72880000	73080000
chr14	73160000	73440000
chr14	73480000	73680000
chr14	73720000	74480000
chr14	74600000	74720000
chr14	74840000	74960000
chr14	75000000	75120000
chr14	75320000	76160000
chr14	76280000	76400000
chr14	76480000	76880000
chr14	76920000	78200000
chr14	78280000	79040000
chr14	79160000	79320000
chr14	79480000	79760000
chr14	79800000	79960000
chr14	80000000	80040000
chr14	80160000	80200000
chr14	80280000	80560000
chr14	80600000	80720000
chr14	80800000	80840000
chr14	80920000	81320000
chr14	81400000	81520000
chr14	81560000	82040000
chr14	82120000	82400000
chr14	82440000	82760000
chr14	82840000	83240000
chr14	83280000	83560000
chr14	83600000	84280000
chr14	84560000	84640000
chr14	84680000	84800000
chr14	84880000	85360000
chr14	85520000	85760000
chr14	85840000	86320000
chr14	86360000	87760000
chr14	87960000	88040000
chr14	88160000	88680000
chr14	88720000	89400000
chr14	89440000	89520000
chr14	89600000	91040000
chr14	91080000	91320000
chr14	91360000	91520000
chr14	91560000	91760000
chr14	91800000	92400000
chr14	92640000	93840000
chr14	93920000	94760000
chr14	94840000	95200000
chr14	95240000	95560000
chr14	95600000	95640000
chr14	95720000	96160000
chr14	96200000	96840000
chr14	96880000	96960000
chr14	97040000	97440000
chr14	97560000	97640000
chr14	97680000	97720000
chr14	97760000	97840000
chr14	97880000	98000000
chr14	98080000	99000000
chr14	99040000	99240000
chr14	99320000	99840000
chr14	99920000	100280000
chr14	100320000	100440000
chr14	100480000	101000000
chr14	101040000	101480000
chr14	101520000	101960000
chr14	102040000	102160000
chr14	102320000	102560000
chr14	102640000	102800000
chr14	102920000	103120000
chr14	103200000	103320000
chr14	103360000	103760000
chr14	103800000	104200000
chr14	104240000	104360000
chr14	104400000	104760000
chr14	104840000	104880000
chr14	104920000	105120000
chr14	105160000	105200000
chr14	105240000	105760000
chr14	105840000	105960000
chr14	106000000	107120000
chr16	90120000	90160000
chr17	40000	320000
chr17	480000	640000
chr17	680000	2240000
chr17	2360000	2440000
chr17	2520000	2640000
chr17	2680000	2960000
chr17	3040000	3840000
chr17	3960000	4240000
chr17	4280000	5360000
chr17	5560000	6360000
chr17	6440000	6680000
chr17	6840000	7200000
chr17	7240000	7480000
chr17	7560000	7760000
chr17	7920000	8520000
chr17	8560000	8640000
chr17	8680000	9520000
chr17	9640000	9760000
chr17	9800000	9920000
chr17	9960000	10960000
chr17	11040000	11840000
chr17	11880000	12040000
chr17	12120000	13240000
chr17	13280000	13400000
chr17	13440000	13920000
chr17	13960000	14520000
chr17	14600000	14840000
chr17	14880000	15120000
chr17	15160000	15480000
chr17	15840000	16280000
chr17	16320000	16440000
chr17	16720000	17280000
chr17	17320000	17800000
chr17	17920000	18320000
chr17	18560000	18720000
chr17	18800000	18920000
chr17	19160000	19320000
chr17	19400000	19520000
chr17	19560000	19760000
chr17	19800000	20240000
chr17	20320000	20360000
chr17	20480000	20560000
chr17	20680000	20760000
chr17	20800000	20880000
chr17	21120000	21440000
chr17	21480000	21520000
chr17	21800000	22280000
chr20	120000	1200000
chr20	1240000	1360000
chr20	1480000	1720000
chr20	1760000	1920000
chr20	2000000	2040000
chr20	2120000	2680000
chr20	2760000	2800000
chr20	3000000	3160000
chr20	3200000	3240000
chr20	3320000	3480000
chr20	3520000	3800000
chr20	3880000	4600000
chr20	4640000	4920000
chr20	4960000	5120000
chr20	5200000	5240000
chr20	5400000	5600000
chr20	5640000	5920000
chr20	5960000	6200000
chr20	6400000	6680000
chr20	6720000	7840000
chr20	7880000	7960000
chr20	8080000	8120000
chr20	8160000	8240000
chr20	8280000	8880000
chr20	8920000	8960000
chr20	9000000	9160000
chr20	9560000	9840000
chr20	9880000	10040000
chr20	10080000	10160000
chr20	10200000	10400000
chr20	10440000	10640000
chr20	10680000	10920000
chr20	10960000	11000000
chr20	11040000	11800000
chr20	11920000	12040000
chr20	12280000	12640000
chr20	12720000	12840000
chr20	12880000	13040000
chr20	13080000	13160000
chr20	13200000	13240000
chr20	13320000	13560000
chr20	13680000	14600000
chr20	14720000	14920000
chr20	15040000	15200000
chr20	15240000	15720000
chr20	15800000	16240000
chr20	16480000	16800000
chr20	16840000	17000000
chr20	17040000	17160000
chr20	17200000	17760000
chr20	17800000	17920000
chr20	18000000	18840000
chr20	18880000	19280000
chr20	19400000	19600000
chr20	19640000	20000000
chr20	20040000	20400000
chr20	20760000	20920000
chr20	20960000	21160000
chr20	21200000	21400000
chr20	21520000	21640000
chr20	21760000	21920000
chr20	21960000	22040000
chr20	22080000	22360000
chr20	22480000	22680000
chr20	22720000	22960000
chr20	23040000	23440000
chr20	23480000	23960000
chr20	24040000	24280000
chr20	24320000	24560000
chr20	24640000	24680000
chr20	24720000	24800000
chr20	24880000	25120000
chr20	25200000	25760000
chr20	26080000	26160000
chr22	23440000	23520000
chr22	23640000	23960000
chr22	24000000	24480000
chr22	24600000	25040000
chr22	25120000	25240000
chr22	25280000	25960000
chr22	26120000	26480000
chr22	26600000	27680000
chr22	27760000	28040000
chr22	28080000	28200000
chr22	28320000	28680000
chr22	28720000	28800000
chr22	28840000	29320000
chr22	29400000	30000000
chr22	30040000	31280000
chr22	31360000	31480000
chr22	31520000	32040000
chr22	32320000	32600000
chr22	32640000	32760000
chr22	32800000	33040000
chr22	33120000	33520000
chr22	33560000	33640000
chr22	33720000	33760000
chr22	33800000	33840000
chr22	33880000	33920000
chr22	33960000	34280000
chr22	34320000	34360000
chr22	34400000	35400000
chr22	35440000	35640000
chr22	35680000	35760000
chr22	35800000	35880000
chr22	35920000	36040000
chr22	36080000	37240000
chr22	37280000	37680000
chr22	37720000	37840000
chr22	37920000	37960000
chr22	38080000	38280000
chr22	38360000	38640000
chr22	38680000	38720000
chr22	38760000	39360000
chr22	39400000	39760000
chr22	39840000	39880000
chr22	39920000	40120000
chr22	40320000	40640000
chr22	41080000	41240000
chr22	41400000	41440000
chr22	41600000	41720000
chr22	41760000	41880000
chr22	42000000	42200000
chr22	42360000	42480000
chr22	42520000	42960000
chr22	43000000	43200000
chr22	43440000	44040000
chr22	44080000	44840000
chr22	44880000	45600000
chr22	45640000	45720000
chr22	45760000	46000000
chr22	46080000	46480000
chr22	46520000	46600000
chr22	46760000	47360000
chr22	47400000	47440000
chr22	47560000	47680000
chr22	47760000	48360000
chr22	48400000	49000000
chr22	49080000	49840000
chr22	49880000	50000000
chr22	50040000	50120000
chr22	50240000	50280000
chr22	50320000	50360000
chr22	50400000	50640000
chr22	50680000	50760000
chr22	50840000	51000000
chr22	51040000	51200000
chrX	2680000	2880000
chrX	2920000	3080000
chrX	3120000	3360000
chrX	3400000	3600000
chrX	3640000	3680000
chrX	4040000	4400000
chrX	4440000	4800000
chrX	4840000	4920000
chrX	4960000	5320000
chrX	5360000	5760000
chrX	5880000	6320000
chrX	6640000	6680000
chrX	6720000	6760000
chrX	6840000	6960000
chrX	7120000	7320000
chrX	7600000	7920000
chrX	8000000	8080000
chrX	8120000	8440000
chrX	8600000	8960000
chrX	9080000	9120000
chrX	9160000	9320000
chrX	9360000	9440000
chrX	9520000	9560000
chrX	9600000	9960000
chrX	10120000	10360000
chrX	11680000	11840000
chrX	11880000	12360000
chrX	12440000	12520000
chrX	12720000	12760000
chrX	12840000	13040000
chrX	13120000	13480000
chrX	13520000	13760000
chrX	13800000	13960000
chrX	14080000	14160000
chrX	14320000	14400000
chrX	14600000	15120000
chrX	15160000	15280000
chrX	15400000	15440000
chrX	15760000	15800000
chrX	16040000	16280000
chrX	16480000	16560000
chrX	16840000	17200000
chrX	17480000	17560000
chrX	18120000	18200000
chrX	18240000	18280000
chrX	18360000	18400000
chrX	18680000	18720000
chrX	18800000	18960000
chrX	19440000	19520000
chrX	20520000	20640000
chrX	20720000	20800000
chrX	21040000	21080000
chrX	21720000	21960000
chrX	22000000	22040000
chrX	22120000	22160000
chrX	22320000	22360000
chrX	22720000	22760000
chrX	22800000	23040000
chrX	23120000	23920000
chrX	24080000	24160000
chrX	24240000	24320000
chrX	24480000	24600000
chrX	25560000	25840000
chrX	26080000	26240000
chrX	26280000	26920000
chrX	27120000	27640000
chrX	28080000	28280000
chrX	28360000	28560000
chrX	28640000	28800000
chrX	29120000	29640000
chrX	29680000	29800000
chrX	29880000	30040000
chrX	30080000	30320000
chrX	30360000	30440000
chrX	30520000	31080000
chrX	31120000	31200000
chrX	31280000	31400000
chrX	31560000	31760000
chrX	31800000	32080000
chrX	32120000	32440000
chrX	32560000	32600000
chrX	32760000	33000000
chrX	33040000	33320000
chrX	33400000	34320000
chrX	34360000	34480000
chrX	34960000	35080000
chrX	35160000	35600000
chrX	37760000	37880000
chrX	38000000	38240000
chrX	38360000	38440000
chrX	38600000	38960000
chrX	39120000	39160000
chrX	39400000	39480000
chrX	39560000	39760000
chrX	39960000	40000000
chrX	40040000	40080000
chrX	40200000	40280000
chrX	40320000	40520000
chrX	40640000	40680000
chrX	40720000	41040000
chrX	41120000	41160000
chrX	41240000	41280000
chrX	41360000	41560000
chrX	41600000	41800000
chrX	41840000	41960000
chrX	42720000	42840000
chrX	43000000	43080000
chrX	43120000	43240000
chrX	44000000	44560000
chrX	44600000	44680000
chrX	45000000	45320000
chrX	45520000	45640000
chrX	45800000	45840000
chrX	45880000	45960000
chrX	46040000	46080000
chrX	46160000	46360000
chrX	46400000	46480000
chrX	46520000	46720000
chrX	46760000	46800000
chrX	46840000	46880000
chrX	46920000	47000000
chrX	47120000	47240000
chrX	47320000	47400000
chrX	47720000	47760000
chrX	47960000	48240000
chrX	48280000	48520000
chrX	48600000	48640000
chrX	48680000	48760000
chrX	49000000	49040000
chrX	49120000	49200000
chrX	49360000	49400000
chrX	49520000	49720000
chrX	49760000	49800000
chrX	50240000	50400000
chrX	50440000	50520000
chrX	50560000	50640000
chrX	50720000	50840000
chrX	50920000	51000000
chrX	51160000	51200000
chrX	51480000	51920000
chrX	52000000	52040000
chrX	52800000	52840000
chrX	52880000	52920000
chrX	53120000	53320000
chrX	53440000	53480000
chrX	53640000	53680000
chrX	53760000	53920000
chrX	54080000	54160000
chrX	54360000	54400000
chrX	54840000	54960000
chrX	55120000	55360000
chrX	55600000	55640000
chrX	55680000	56200000
chrX	56440000	56640000
chrX	57080000	57600000
chrX	57800000	57880000
chrX	58120000	58280000
chrX	61720000	61760000
chrX	65280000	65360000
chrX	65480000	65920000
chrX	66000000	66200000
chrX	66280000	66560000
chrX	66800000	66840000
chrX	66880000	67120000
chrX	67280000	67480000
chrX	67600000	67720000
chrX	68040000	68120000
chrX	68200000	68240000
chrX	68320000	68800000
chrX	68840000	69400000
chrX	69520000	70320000
chrX	70840000	70920000
chrX	71000000	71400000
chrX	71480000	71560000
chrX	72200000	72280000
chrX	72400000	72640000
chrX	72680000	72720000
chrX	72880000	72920000
chrX	73280000	73640000
chrX	73680000	73760000
chrX	73880000	73920000
chrX	74320000	74720000
chrX	74760000	74960000
chrX	75000000	75040000
chrX	75080000	75640000
chrX	76000000	76640000
chrX	77480000	77760000
chrX	78000000	79600000
chrX	79760000	79920000
chrX	80000000	80120000
chrX	80240000	80360000
chrX	80520000	80720000
chrX	80840000	81040000
chrX	81120000	81200000
chrX	82000000	82080000
chrX	82240000	82360000
chrX	82880000	83000000
chrX	83160000	83280000
chrX	83440000	83560000
chrX	83600000	84040000
chrX	84120000	84600000
chrX	84720000	84960000
chrX	85120000	85280000
chrX	85440000	85480000
chrX	85520000	85760000
chrX	85920000	86000000
chrX	86040000	86960000
chrX	87000000	87160000
chrX	87520000	87600000
chrX	87640000	87680000
chrX	87720000	87760000
chrX	87800000	87840000
chrX	88000000	88200000
chrX	88240000	88480000
chrX	88520000	88600000
chrX	88640000	88800000
chrX	88840000	88880000
chrX	88920000	89080000
chrX	89120000	89160000
chrX	89240000	89280000
chrX	89360000	89440000
chrX	90120000	90160000
chrX	90360000	90400000
chrX	90440000	90600000
chrX	90680000	90760000
chrX	90960000	91040000
chrX	91400000	91600000
chrX	91720000	91800000
chrX	91840000	91920000
chrX	92040000	92080000
chrX	92160000	92200000
chrX	92240000	92320000
chrX	92360000	92440000
chrX	92480000	92640000
chrX	92720000	92800000
chrX	92920000	92960000
chrX	93160000	93240000
chrX	93280000	93400000
chrX	93480000	93680000
chrX	93720000	94520000
chrX	94800000	94880000
chrX	95000000	95400000
chrX	95480000	95600000
chrX	95720000	95840000
chrX	96120000	96360000
chrX	96400000	96560000
chrX	96600000	96640000
chrX	96760000	96800000
chrX	96840000	96880000
chrX	96920000	97080000
chrX	97360000	97680000
chrX	97720000	98240000
chrX	98320000	98400000
chrX	98520000	98640000
chrX	99040000	99760000
chrX	99840000	100040000
chrX	100200000	100360000
chrX	100520000	100600000
chrX	100720000	100760000
chrX	100920000	100960000
chrX	101360000	101440000
chrX	102240000	102280000
chrX	102320000	102360000
chrX	102400000	102480000
chrX	102520000	102600000
chrX	102680000	102760000
chrX	102800000	102880000
chrX	102960000	103040000
chrX	103080000	103280000
chrX	103320000	103360000
chrX	103400000	103520000
chrX	103600000	103640000
chrX	103680000	103800000
chrX	103840000	104480000
chrX	104600000	104640000
chrX	104760000	104800000
chrX	105280000	105320000
chrX	106920000	106960000
chrX	107200000	107520000
chrX	107640000	107680000
chrX	108000000	108160000
chrX	108280000	108560000
chrX	108720000	108800000
chrX	108920000	109080000
chrX	109200000	109240000
chrX	109680000	109960000
chrX	110000000	110040000
chrX	110080000	110400000
chrX	111120000	111160000
chrX	111400000	111520000
chrX	111640000	112040000
chrX	112160000	112240000
chrX	112320000	112640000
chrX	112760000	113040000
chrX	113280000	113320000
chrX	113360000	113400000
chrX	113560000	113600000
chrX	113640000	113720000
chrX	113760000	113800000
chrX	114040000	114240000
chrX	114400000	114480000
chrX	114560000	114760000
chrX	115000000	115040000
chrX	115160000	115200000
chrX	115240000	115320000
chrX	115360000	115400000
chrX	115440000	115520000
chrX	115560000	115640000
chrX	115720000	116360000
chrX	116400000	116480000
chrX	116600000	117440000
chrX	117600000	117720000
chrX	117760000	117840000
chrX	117960000	118200000
chrX	118240000	118360000
chrX	118480000	118560000
chrX	118720000	118760000
chrX	118840000	118920000
chrX	118960000	119040000
chrX	119080000	119120000
chrX	119360000	119560000
chrX	119600000	119640000
chrX	119680000	120000000
chrX	120280000	120400000
chrX	120560000	120680000
chrX	120960000	121240000
chrX	121480000	121640000
chrX	121720000	121880000
chrX	121960000	122240000
chrX	122360000	122440000
chrX	122480000	122720000
chrX	122760000	122920000
chrX	123200000	123320000
chrX	123360000	123520000
chrX	123560000	123640000
chrX	123680000	123760000
chrX	124280000	124320000
chrX	124480000	124520000
chrX	124560000	124880000
chrX	125000000	125080000
chrX	125440000	127200000
chrX	127240000	127400000
chrX	127440000	127480000
chrX	127520000	127600000
chrX	127640000	127680000
chrX	127720000	128200000
chrX	128240000	128280000
chrX	128320000	128520000
chrX	128920000	128960000
chrX	129200000	129440000
chrX	129600000	129720000
chrX	130200000	130360000
chrX	130400000	130840000
chrX	130920000	131000000
chrX	131080000	131440000
chrX	131600000	131760000
chrX	131840000	132160000
chrX	132240000	132320000
chrX	132640000	132680000
chrX	133240000	133280000
chrX	133320000	133360000
chrX	133400000	133440000
chrX	133680000	133760000
chrX	134040000	134120000
chrX	134200000	134240000
chrX	134280000	134320000
chrX	134520000	134600000
chrX	134640000	134880000
chrX	134960000	135040000
chrX	135160000	135200000
chrX	135240000	135280000
chrX	135400000	135520000
chrX	135680000	135760000
chrX	135800000	135880000
chrX	135960000	136000000
chrX	136160000	136440000
chrX	136520000	136560000
chrX	136840000	137440000
chrX	137720000	137800000
chrX	137840000	137880000
chrX	137960000	138120000
chrX	138240000	138440000
chrX	138480000	138520000
chrX	138560000	138840000
chrX	139000000	139240000
chrX	139560000	139640000
chrX	139800000	140080000
chrX	140240000	140280000
chrX	140360000	140560000
chrX	140800000	140920000
chrX	141000000	141680000
chrX	141720000	141880000
chrX	141920000	142240000
chrX	142400000	142520000
chrX	142600000	142920000
chrX	143040000	143160000
chrX	143280000	143520000
chrX	143560000	143760000
chrX	143920000	144000000
chrX	144040000	144200000
chrX	144240000	144760000
chrX	144800000	145000000
chrX	145160000	145240000
chrX	145320000	145360000
chrX	145400000	145480000
chrX	145520000	145960000
chrX	146040000	146160000
chrX	146320000	146360000
chrX	146520000	146720000
chrX	146880000	147000000
chrX	147040000	147080000
chrX	147280000	147360000
chrX	147520000	147720000
chrX	147760000	147840000
chrX	147880000	148640000
chrX	148680000	148720000
chrX	148760000	148800000
chrX	148880000	148920000
chrX	149120000	149400000
chrX	149480000	149760000
chrX	149800000	149960000
chrX	150080000	150120000
chrX	150160000	150680000
chrX	150720000	151000000
chrX	151080000	151320000
chrX	151360000	151400000
chrX	151560000	151640000
chrX	151680000	151720000
chrX	151880000	151920000
chrX	151960000	152000000
chrX	152040000	152120000
chrX	152160000	152240000
chrX	152360000	152440000
chrX	152560000	152640000
chrX	152720000	152920000
chrX	153000000	153120000
chrX	153240000	153320000
chrX	153600000	153760000
chrX	153920000	153960000
chrX	154000000	154080000
[truncated: 3 more rows]
