# Supplementary material for: Comprehensive, integrated, and phased whole-genome analysis of the primary ENCODE cell line K562
Source: HighWire-hosted journal article supplement (doi:10.1101/gr.234948.118), 2019-02-08
Supplement: Supplemental_Table_S5.xlsx [file Supplemental_Table_S5.xlsx]

## Sheet: SNVs
hg19 reference; 1-based genomic coordinate counting
Table S5 K562 PPA Variants
CHROM	POS	ID	REF	ALT	QUAL	FILTER	INFO	FORMAT	K562_PE
1	6181198	.	T	G	1485.2	PASS	AC=2;AF=0.500;AN=4;BaseQRankSum=0.112;ClippingRankSum=-0.553;DP=86;FS=5.504;MLEAC=2;MLEAF=0.500;MQ=60.00;MQ0=0;MQRankSum=0.311;QD=17.27;ReadPosRankSum=2.628;SOR=1.285;VQSLOD=14.05;culprit=ReadPosRankSum;ANN=G|missense_variant|MODERATE|CHD5|CHD5|transcript|NM_015557.2|protein_coding|33/42|c.4879A>C|p.Lys1627Gln|4990/9663|4879/5865|1627/1954||	GT:AD:DP:GQ:PL	0/0/1/1:45,41:86:42:1512,42,0,66,2507
1	6181199	.	C	A	1485.2	PASS	AC=2;AF=0.500;AN=4;BaseQRankSum=-1.971;ClippingRankSum=0.424;DP=86;FS=7.032;MLEAC=2;MLEAF=0.500;MQ=60.00;MQ0=0;MQRankSum=0.614;QD=17.27;ReadPosRankSum=2.482;SOR=1.326;VQSLOD=14.17;culprit=ReadPosRankSum;ANN=A|missense_variant|MODERATE|CHD5|CHD5|transcript|NM_015557.2|protein_coding|33/42|c.4878G>T|p.Glu1626Asp|4989/9663|4878/5865|1626/1954||	GT:AD:DP:GQ:PL	0/0/1/1:45,41:86:42:1512,42,0,66,2507
1	6196598	.	A	G	453.2	PASS	AC=1;AF=0.250;AN=4;BaseQRankSum=2.225;ClippingRankSum=0.261;DP=77;FS=9.281;MLEAC=1;MLEAF=0.250;MQ=60.00;MQ0=0;MQRankSum=0.703;QD=5.89;ReadPosRankSum=1.388;SOR=1.282;VQSLOD=14.36;culprit=QD;ANN=G|missense_variant|MODERATE|CHD5|CHD5|transcript|NM_015557.2|protein_coding|17/42|c.2675T>C|p.Phe892Ser|2786/9663|2675/5865|892/1954||	GT:AD:DP:GQ:PL	0/0/0/1:57,20:77:39:480,0,39,171,1526
1	10523195	rs200082967	C	T	683.39	PASS	AC=1;AF=0.250;AN=4;BaseQRankSum=2.663;ClippingRankSum=-0.208;DB;DP=88;FS=9.298;MLEAC=1;MLEAF=0.250;MQ=60.00;MQ0=0;MQRankSum=0.040;QD=7.86;ReadPosRankSum=0.137;SOR=0.821;VQSLOD=14.39;culprit=MQ;ANN=T|missense_variant|MODERATE|DFFA|DFFA|transcript|NM_004401.2|protein_coding|5/6|c.703G>A|p.Val235Ile|801/2038|703/996|235/331||	GT:AD:DP:GQ:PL	0/0/0/1:56,31:87:5:709,0,5,116,1328
1	10713923	.	G	T	1103.2	PASS	AC=2;AF=0.500;AN=4;BaseQRankSum=-1.483;ClippingRankSum=0.937;DP=102;FS=4.965;MLEAC=2;MLEAF=0.500;MQ=60.00;MQ0=0;MQRankSum=1.092;QD=10.82;ReadPosRankSum=-0.276;SOR=0.767;VQSLOD=13.89;culprit=MQ;ANN=T|missense_variant|MODERATE|CASZ1|CASZ1|transcript|NM_001079843.2|protein_coding|11/21|c.2191C>A|p.Leu731Met|2537/7959|2191/5280|731/1759||	GT:AD:DP:GQ:PL	0/0/1/1:57,45:102:34:1130,34,0,92,1541
1	19282463	.	C	G	110.42	PASS	AC=2;AF=0.500;AN=4;BaseQRankSum=0.322;ClippingRankSum=1.221;DP=8;FS=3.332;MLEAC=2;MLEAF=0.500;MQ=60.00;MQ0=0;MQRankSum=1.517;QD=13.80;ReadPosRankSum=0.322;SOR=1.901;VQSLOD=11.18;culprit=DP;ANN=G|missense_variant|MODERATE|IFFO2|IFFO2|transcript|NM_001136265.1|protein_coding|1/9|c.364G>C|p.Gly122Arg|364/5835|364/1554|122/517||	GT:AD:DP:GQ:PL	0/0/1/1:3,5:8:0:134,10,0,0,73
1	20246804	.	C	T	457.2	PASS	AC=1;AF=0.250;AN=4;BaseQRankSum=-0.679;ClippingRankSum=-0.259;DP=87;FS=0.925;MLEAC=1;MLEAF=0.250;MQ=60.00;MQ0=0;MQRankSum=-1.586;QD=5.38;ReadPosRankSum=1.391;SOR=0.514;VQSLOD=13.71;culprit=QD;ANN=T|missense_variant|MODERATE|PLA2G2E|PLA2G2E|transcript|NM_014589.2|protein_coding|4/4|c.425G>A|p.Cys142Tyr|483/487|425/429|142/142||	GT:AD:DP:GQ:PL	0/0/0/1:61,24:85:37:484,0,37,176,1670
1	36282608	.	G	T	466.2	PASS	AC=1;AF=0.250;AN=4;BaseQRankSum=1.126;ClippingRankSum=-0.901;DP=98;FS=6.746;MLEAC=1;MLEAF=0.250;MQ=60.00;MQ0=0;MQRankSum=0.229;QD=4.91;ReadPosRankSum=0.839;SOR=0.749;VQSLOD=14.34;culprit=QD;ANN=T|missense_variant|MODERATE|AGO4|AGO4|transcript|NM_017629.3|protein_coding|2/18|c.145G>T|p.Val49Leu|335/7060|145/2586|49/861||	GT:AD:DP:GQ:PL	0/0/0/1:74,21:95:66:493,0,66,249,2147
1	40125046	.	G	A	1953.2	PASS	AC=2;AF=0.500;AN=4;BaseQRankSum=0.170;ClippingRankSum=0.773;DP=134;FS=0.000;MLEAC=2;MLEAF=0.500;MQ=60.00;MQ0=0;MQRankSum=0.706;QD=14.58;ReadPosRankSum=0.947;SOR=0.743;VQSLOD=13.44;culprit=DP;ANN=A|missense_variant|MODERATE|NT5C1A|NT5C1A|transcript|NM_032526.2|protein_coding|6/6|c.854C>T|p.Ala285Val|854/1107|854/1107|285/368||	GT:AD:DP:GQ:PL	0/0/1/1:61,73:134:54:1980,110,0,54,1581
1	41453053	.	A	T	1324.2	PASS	AC=2;AF=0.500;AN=4;BaseQRankSum=3.190;ClippingRankSum=-0.151;DP=106;FS=0.726;MLEAC=2;MLEAF=0.500;MQ=60.00;MQ0=0;MQRankSum=0.337;QD=12.61;ReadPosRankSum=0.792;SOR=0.593;VQSLOD=14.21;culprit=MQ;ANN=T|missense_variant|MODERATE|CTPS1|CTPS1|transcript|NM_001905.3|protein_coding|4/19|c.347A>T|p.His116Leu|891/3237|347/1776|116/591||	GT:AD:DP:GQ:PL	0/0/1/1:54,51:105:57:1351,57,0,69,1340
1	43828663	.	G	A	987.2	PASS	AC=2;AF=0.500;AN=4;BaseQRankSum=0.698;ClippingRankSum=-0.486;DP=80;FS=0.000;MLEAC=2;MLEAF=0.500;MQ=60.00;MQ0=0;MQRankSum=0.390;QD=12.34;ReadPosRankSum=1.852;SOR=0.693;VQSLOD=14.27;culprit=MQ;ANN=A|structural_interaction_variant|HIGH|CDC20|CDC20|interaction|4GGC:A_410-A_455:NM_001255.2|protein_coding|11/11|c.1363G>A||||||,A|structural_interaction_variant|HIGH|CDC20|CDC20|interaction|4GGD:A_410-A_4…	GT:AD:DP:GQ:PL	0/0/1/1:40,40:80:47:1014,47,0,50,1080
1	64644017	.	A	C	322.64	PASS	AC=1;AF=0.333;AN=3;BaseQRankSum=-0.007;ClippingRankSum=0.000;DP=67;FS=3.975;MLEAC=1;MLEAF=0.333;MQ=60.00;MQ0=0;MQRankSum=0.000;QD=4.82;ReadPosRankSum=1.783;SOR=1.223;VQSLOD=21.40;culprit=QD;ANN=C|missense_variant|MODERATE|ROR1|ROR1|transcript|NM_005012.3|protein_coding|9/9|c.2293A>C|p.Asn765His|2692/5854|2293/2814|765/937||	GT:AD:DP:GQ:PL	0/0/1:51,16:67:99:350,0,101,1329
1	70503803	.	C	A	546.64	PASS	AC=1;AF=0.333;AN=3;BaseQRankSum=1.356;ClippingRankSum=0.000;DP=65;FS=0.978;MLEAC=1;MLEAF=0.333;MQ=60.00;MQ0=0;MQRankSum=0.000;QD=8.41;ReadPosRankSum=-1.838;SOR=0.534;VQSLOD=21.43;culprit=ReadPosRankSum;ANN=A|missense_variant|MODERATE|LRRC7|LRRC7|transcript|NM_020794.2|protein_coding|19/25|c.2182C>A|p.Pro728Thr|2212/6245|2182/4614|728/1537||	GT:AD:DP:GQ:PL	0/0/1:41,24:65:51:574,0,51,1097
1	79356879	.	A	C	514.64	PASS	AC=1;AF=0.333;AN=3;BaseQRankSum=-0.848;ClippingRankSum=0.000;DP=71;FS=2.107;MLEAC=1;MLEAF=0.333;MQ=60.00;MQ0=0;MQRankSum=0.000;QD=7.25;ReadPosRankSum=1.451;SOR=0.404;VQSLOD=21.53;culprit=MQ;ANN=C|missense_variant|MODERATE|ADGRL4|ADGRL4|transcript|NM_022159.3|protein_coding|15/15|c.2033T>G|p.Leu678Trp|2189/3619|2033/2073|678/690||	GT:AD:DP:GQ:PL	0/0/1:46,25:71:63:542,0,63,1243
1	82447636	.	C	G	305.64	PASS	AC=1;AF=0.333;AN=3;BaseQRankSum=-3.296;ClippingRankSum=0.000;DP=63;FS=1.065;MLEAC=1;MLEAF=0.333;MQ=60.00;MQ0=0;MQRankSum=0.000;QD=4.85;ReadPosRankSum=-0.280;SOR=0.502;VQSLOD=21.64;culprit=QD;ANN=G|missense_variant|MODERATE|ADGRL2|ADGRL2|transcript|NM_001297704.1|protein_coding|18/21|c.3207C>G|p.Ile1069Met|3388/5986|3207/4212|1069/1403||	GT:AD:DP:GQ:PL	0/0/1:45,18:63:82:333,0,82,1345
1	92446579	.	C	T	1222.64	PASS	AC=2;AF=0.667;AN=3;BaseQRankSum=1.860;ClippingRankSum=0.000;DP=74;FS=1.947;MLEAC=2;MLEAF=0.667;MQ=60.00;MQ0=0;MQRankSum=0.000;QD=16.75;ReadPosRankSum=-0.591;SOR=0.831;VQSLOD=21.70;culprit=MQ;ANN=T|stop_gained|HIGH|BRDT|BRDT|transcript|NM_001242806.2|protein_coding|10/19|c.1606C>T|p.Arg536*|1955/3359|1606/2856|536/951||;LOF=(BRDT|BRDT|1|1.00);NMD=(BRDT|BRDT|1|1.00)	GT:AD:DP:GQ:PL	0/1/1:29,44:73:45:1250,45,0,686
1	99772444	.	C	A	806.64	PASS	AC=1;AF=0.333;AN=3;BaseQRankSum=3.095;ClippingRankSum=0.000;DP=80;FS=11.730;MLEAC=1;MLEAF=0.333;MQ=60.00;MQ0=0;MQRankSum=0.000;QD=10.21;ReadPosRankSum=0.027;SOR=1.640;VQSLOD=21.44;culprit=FS;ANN=A|missense_variant|MODERATE|PLPPR4|PLPPR4|transcript|NM_014839.4|protein_coding|7/7|c.2170C>A|p.Arg724Ser|2328/5022|2170/2292|724/763||	GT:AD:DP:GQ:PL	0/0/1:47,32:79:46:834,0,46,1228
1	103540291	.	C	T	1298.64	PASS	AC=2;AF=0.667;AN=3;BaseQRankSum=0.553;ClippingRankSum=0.000;DP=63;FS=1.103;MLEAC=2;MLEAF=0.667;MQ=60.00;MQ0=0;MQRankSum=0.000;QD=20.61;ReadPosRankSum=-0.155;SOR=0.511;VQSLOD=21.63;culprit=MQ;ANN=T|missense_variant|MODERATE|COL11A1|COL11A1|transcript|NM_080629.2|protein_coding|4/67|c.534G>A|p.Met178Ile|852/7327|534/5457|178/1818||	GT:AD:DP:GQ:PL	0/1/1:17,46:63:86:1326,86,0,412
1	111061364	.	A	C	689.21	PASS	AC=1;AF=0.250;AN=4;BaseQRankSum=-1.042;ClippingRankSum=0.480;DP=97;FS=2.849;MLEAC=1;MLEAF=0.250;MQ=60.00;MQ0=0;MQRankSum=0.597;QD=7.11;ReadPosRankSum=1.097;SOR=0.954;VQSLOD=14.21;culprit=MQ;ANN=C|missense_variant|MODERATE|KCNA10|KCNA10|transcript|NM_005549.2|protein_coding|1/1|c.46T>G|p.Phe16Val|434/1959|46/1536|16/511||	GT:AD:DP:GQ:PL	0/0/0/1:67,30:97:27:716,0,27,172,1864
1	117617588	.	G	A	1613.21	PASS	AC=2;AF=0.500;AN=4;BaseQRankSum=-0.065;ClippingRankSum=0.299;DP=101;FS=9.566;MLEAC=2;MLEAF=0.500;MQ=60.00;MQ0=0;MQRankSum=-0.264;QD=15.97;ReadPosRankSum=1.240;SOR=0.914;VQSLOD=14.56;culprit=MQ;ANN=A|missense_variant|MODERATE|TTF2|TTF2|transcript|NM_003594.3|protein_coding|5/23|c.382G>A|p.Val128Ile|402/4854|382/3489|128/1162||	GT:AD:DP:GQ:PL	0/0/1/1:43,58:101:26:1640,99,0,26,1131
1	120461979	.	G	T	51.2	PASS	AC=1;AF=0.250;AN=4;BaseQRankSum=1.523;ClippingRankSum=-0.402;DP=127;FS=0.000;MLEAC=1;MLEAF=0.250;MQ=60.00;MQ0=0;MQRankSum=-0.461;QD=0.40;ReadPosRankSum=0.273;SOR=0.551;VQSLOD=13.07;culprit=QD;ANN=T|missense_variant|MODERATE|NOTCH2|NOTCH2|transcript|NM_024408.3|protein_coding|31/34|c.5737C>A|p.Pro1913Thr|6034/11466|5737/7416|1913/2471||	GT:AD:DP:GQ:PL	0/0/0/1:119,8:127:78:78,0,185,527,3683
1	145109583	rs2794053	C	A	5037.78	PASS	AC=2;AF=0.667;AN=3;BaseQRankSum=10.928;ClippingRankSum=0.000;DB;DP=366;FS=1.692;MLEAC=2;MLEAF=0.667;MQ=60.00;MQ0=0;MQRankSum=0.000;QD=13.76;ReadPosRankSum=0.778;SOR=0.631;VQSLOD=0.638;culprit=DP;ANN=A|missense_variant|MODERATE|SEC22B|SEC22B|transcript|NM_004892.5|protein_coding|3/6|c.245C>A|p.Thr82Lys|385/1883|245/648|82/215||,A|intron_variant|MODIFIER|NBPF20|NBPF20|transcript|NM_001278267.1|prot…	GT:AD:DP:GQ:PL	0/1/1:181,185:366:15:5065,15,0,4216
1	147230991	.	C	T	51.64	PASS	AC=1;AF=0.333;AN=3;BaseQRankSum=-2.510;ClippingRankSum=0.000;DP=61;FS=1.454;MLEAC=1;MLEAF=0.333;MQ=60.00;MQ0=0;MQRankSum=0.000;QD=0.85;ReadPosRankSum=-0.526;SOR=1.033;VQSLOD=21.46;culprit=QD;ANN=T|missense_variant|MODERATE|GJA5|GJA5|transcript|NM_005266.6|protein_coding|2/2|c.356G>A|p.Gly119Asp|500/3159|356/1077|119/358||	GT:AD:DP:GQ:PL	0/0/1:53,8:61:79:79,0,136,1598
1	155260401	.	C	T	422.64	PASS	AC=1;AF=0.333;AN=3;BaseQRankSum=-0.187;ClippingRankSum=0.000;DP=61;FS=15.252;MLEAC=1;MLEAF=0.333;MQ=60.00;MQ0=0;MQRankSum=0.000;QD=6.93;ReadPosRankSum=-1.521;SOR=1.341;VQSLOD=19.95;culprit=FS;ANN=T|missense_variant|MODERATE|PKLR|PKLR|transcript|NM_000298.5|protein_coding|11/11|c.1687G>A|p.Gly563Ser|1726/3043|1687/1725|563/574||,T|downstream_gene_variant|MODIFIER|HCN3|HCN3|transcript|NM_020897.2|p…	GT:AD:DP:GQ:PL	0/0/1:40,21:61:58:450,0,58,1522
1	159505704	.	G	C	268.64	PASS	AC=1;AF=0.333;AN=3;BaseQRankSum=-4.687;ClippingRankSum=0.000;DP=60;FS=0.000;MLEAC=1;MLEAF=0.333;MQ=60.00;MQ0=0;MQRankSum=0.000;QD=4.48;ReadPosRankSum=0.270;SOR=0.639;VQSLOD=21.64;culprit=QD;ANN=C|missense_variant|MODERATE|OR10J5|OR10J5|transcript|NM_001004469.1|protein_coding|1/1|c.94C>G|p.Leu32Val|94/930|94/930|32/309||	GT:AD:DP:GQ:PL	0/0/1:43,17:60:79:296,0,79,1277
1	160340860	.	G	T	440.64	PASS	AC=1;AF=0.333;AN=3;BaseQRankSum=-2.026;ClippingRankSum=0.000;DP=60;FS=3.812;MLEAC=1;MLEAF=0.333;MQ=60.00;MQ0=0;MQRankSum=0.000;QD=7.34;ReadPosRankSum=0.822;SOR=1.287;VQSLOD=21.60;culprit=MQ;ANN=T|missense_variant|MODERATE|NHLH1|NHLH1|transcript|NM_005598.3|protein_coding|2/2|c.339G>T|p.Lys113Asn|781/2559|339/402|113/133||	GT:AD:DP:GQ:PL	0/0/1:39,21:60:53:468,0,53,1063
1	179497547	.	C	A	612.2	PASS	AC=1;AF=0.250;AN=4;BaseQRankSum=2.003;ClippingRankSum=0.000;DP=94;FS=3.093;MLEAC=1;MLEAF=0.250;MQ=60.00;MQ0=0;MQRankSum=0.000;QD=6.51;ReadPosRankSum=-0.116;SOR=0.406;VQSLOD=21.38;culprit=QD;ANN=A|missense_variant|MODERATE|AXDND1|AXDND1|transcript|NM_144696.5|protein_coding|23/26|c.2696C>A|p.Thr899Lys|3083/3642|2696/3039|899/1012||	GT:AD:DP:GQ:PL	0/0/0/1:68,26:94:41:639,0,41,199,1971
1	202104836	.	G	T	882.2	PASS	AC=1;AF=0.250;AN=4;BaseQRankSum=3.912;ClippingRankSum=0.000;DP=120;FS=5.016;MLEAC=1;MLEAF=0.250;MQ=60.00;MQ0=0;MQRankSum=0.000;QD=7.35;ReadPosRankSum=0.783;SOR=1.217;VQSLOD=20.16;culprit=DP;ANN=T|structural_interaction_variant|HIGH|ARL8A|ARL8A|interaction|2H18:A_92-A_124:NM_138795.3|protein_coding|4/7|c.371C>A||||||,T|structural_interaction_variant|HIGH|ARL8A|ARL8A|interaction|4ILE:A_92-A_124:NM_…	GT:AD:DP:GQ:PL	0/0/0/1:83,37:120:34:909,0,34,215,2152
1	202566001	.	C	T	428.2	PASS	AC=1;AF=0.250;AN=4;BaseQRankSum=-2.163;ClippingRankSum=0.000;DP=98;FS=3.179;MLEAC=1;MLEAF=0.250;MQ=60.00;MQ0=0;MQRankSum=0.000;QD=4.41;ReadPosRankSum=0.080;SOR=0.567;VQSLOD=21.21;culprit=QD;ANN=T|missense_variant|MODERATE|SYT2|SYT2|transcript|NM_001136504.1|protein_coding|9/9|c.1144G>A|p.Gly382Ser|1337/7613|1144/1260|382/419||	GT:AD:DP:GQ:PL	0/0/0/1:74,23:97:63:455,0,63,243,2200
1	204093772	.	C	A	595.2	PASS	AC=1;AF=0.250;AN=4;BaseQRankSum=-2.927;ClippingRankSum=0.000;DP=94;FS=2.963;MLEAC=1;MLEAF=0.250;MQ=60.00;MQ0=0;MQRankSum=0.000;QD=6.33;ReadPosRankSum=1.293;SOR=0.697;VQSLOD=21.21;culprit=QD;ANN=A|missense_variant|MODERATE|SOX13|SOX13|transcript|NM_005686.2|protein_coding|13/14|c.1379C>A|p.Ser460Tyr|1974/4073|1379/1869|460/622||	GT:AD:DP:GQ:PL	0/0/0/1:66,28:94:32:622,0,32,179,1920
1	210761437	.	C	A	447.2	PASS	AC=1;AF=0.250;AN=4;BaseQRankSum=-0.654;ClippingRankSum=0.000;DP=76;FS=2.102;MLEAC=1;MLEAF=0.250;MQ=60.00;MQ0=0;MQRankSum=0.000;QD=5.88;ReadPosRankSum=-1.137;SOR=0.460;VQSLOD=21.57;culprit=QD;ANN=A|missense_variant|MODERATE|HHAT|HHAT|transcript|NM_001170587.2|protein_coding|9/11|c.1242C>A|p.Asp414Glu|1347/3507|1242/1485|414/494||	GT:AD:DP:GQ:PL	0/0/0/1:54,22:76:30:474,0,30,154,1576
1	217793592	.	G	T	66.2	PASS	AC=1;AF=0.250;AN=4;BaseQRankSum=-0.008;ClippingRankSum=0.000;DP=85;FS=6.091;MLEAC=1;MLEAF=0.250;MQ=60.00;MQ0=0;MQRankSum=0.000;QD=0.78;ReadPosRankSum=0.581;SOR=1.541;VQSLOD=21.54;culprit=QD;ANN=T|missense_variant|MODERATE|GPATCH2|GPATCH2|transcript|NM_018040.3|protein_coding|2/10|c.306C>A|p.Asp102Glu|437/5870|306/1587|102/528||	GT:AD:DP:GQ:PL	0/0/0/1:78,7:85:93:93,0,116,336,2447
1	226485418	.	A	C	903.2	PASS	AC=1;AF=0.250;AN=4;BaseQRankSum=0.406;ClippingRankSum=0.000;DP=141;FS=1.508;MLEAC=1;MLEAF=0.250;MQ=60.00;MQ0=0;MQRankSum=0.000;QD=6.41;ReadPosRankSum=-0.048;SOR=0.543;VQSLOD=18.45;culprit=DP;ANN=C|splice_donor_variant&intron_variant|HIGH|LIN9|LIN9|transcript|NM_173083.3|protein_coding|3/14|c.207+2T>G||||||;LOF=(LIN9|LIN9|1|1.00)	GT:AD:DP:GQ:PL	0/0/0/1:102,39:141:62:930,0,62,298,2977
1	228511278	.	C	T	455.2	PASS	AC=1;AF=0.250;AN=4;BaseQRankSum=-1.176;ClippingRankSum=0.000;DP=104;FS=4.490;MLEAC=1;MLEAF=0.250;MQ=60.00;MQ0=0;MQRankSum=0.000;QD=4.38;ReadPosRankSum=1.664;SOR=0.958;VQSLOD=20.76;culprit=QD;ANN=T|missense_variant|MODERATE|OBSCN|OBSCN|transcript|NM_001271223.2|protein_coding|67/116|c.18494C>T|p.Ser6165Phe|18568/26925|18494/26772|6165/8923||	GT:AD:DP:GQ:PL	0/0/0/1:80,24:104:70:482,0,70,269,2394
1	228596421	.	G	C	2296.2	PASS	AC=3;AF=0.750;AN=4;BaseQRankSum=1.969;ClippingRankSum=0.000;DP=112;FS=0.000;MLEAC=3;MLEAF=0.750;MQ=60.00;MQ0=0;MQRankSum=0.000;QD=20.69;ReadPosRankSum=-0.546;SOR=0.770;VQSLOD=20.50;culprit=MQ;ANN=C|stop_gained|HIGH|TRIM17|TRIM17|transcript|NM_001024940.2|protein_coding|7/7|c.915C>G|p.Tyr305*|1264/2049|915/1434|305/477||,C|upstream_gene_variant|MODIFIER|TRIM11|TRIM11|transcript|NM_145214.2|protein…	GT:AD:DP:GQ:PL	0/1/1/1:32,79:111:42:2323,222,42,0,761
1	235860410	.	G	T	529.2	PASS	AC=1;AF=0.250;AN=4;BaseQRankSum=-0.053;ClippingRankSum=0.000;DP=109;FS=0.000;MLEAC=1;MLEAF=0.250;MQ=60.00;MQ0=0;MQRankSum=0.000;QD=4.90;ReadPosRankSum=0.921;SOR=0.704;VQSLOD=20.72;culprit=QD;ANN=T|missense_variant|MODERATE|LYST|LYST|transcript|NM_000081.3|protein_coding|46/53|c.10537C>A|p.Leu3513Ile|10719/13497|10537/11406|3513/3801||,T|intron_variant|MODIFIER|MIR5096|MIR5096.2|transcript|NR_0399…	GT:AD:DP:GQ:PL	0/0/0/1:83,25:108:71:556,0,71,276,2494
1	243858956	.	C	A	567.2	PASS	AC=1;AF=0.250;AN=4;BaseQRankSum=-2.647;ClippingRankSum=0.000;DP=105;FS=18.513;MLEAC=1;MLEAF=0.250;MQ=60.00;MQ0=0;MQRankSum=0.000;QD=5.40;ReadPosRankSum=-0.194;SOR=1.389;VQSLOD=18.29;culprit=FS;ANN=A|stop_gained|HIGH|AKT3|AKT3|transcript|NM_005465.4|protein_coding|2/13|c.109G>T|p.Gly37*|221/7082|109/1440|37/479||;LOF=(AKT3|AKT3|1|1.00);NMD=(AKT3|AKT3|1|1.00)	GT:AD:DP:GQ:PL	0/0/0/1:78,27:105:56:594,0,56,242,2331
2	26428674	rs4665836	T	A	238.64	PASS	AC=1;AF=0.333;AN=3;BaseQRankSum=-0.106;ClippingRankSum=0.000;DB;DP=51;FS=0.000;MLEAC=1;MLEAF=0.333;MQ=60.00;MQ0=0;MQRankSum=0.000;POSITIVE_TRAIN_SITE;QD=4.68;ReadPosRankSum=-0.247;SOR=0.687;VQSLOD=23.17;culprit=QD;ANN=A|sequence_feature|MODERATE|HADHA|HADHA|modified-residue:N6-acetyllysine|NM_000182.4|protein_coding||c.1086-1609A>T||||||,A|intron_variant|MODIFIER|HADHA|HADHA|transcript|NM_000182.…	GT:AD:DP:GQ:PL	0/0/1:37,14:51:67:266,0,67,857
2	46602945	.	C	T	463.64	PASS	AC=1;AF=0.333;AN=3;BaseQRankSum=1.405;ClippingRankSum=0.000;DP=54;FS=7.924;MLEAC=1;MLEAF=0.333;MQ=60.00;MQ0=0;MQRankSum=0.000;QD=8.59;ReadPosRankSum=-1.104;SOR=0.913;VQSLOD=21.60;culprit=MQ;ANN=T|stop_gained|HIGH|EPAS1|EPAS1|transcript|NM_001430.4|protein_coding|8/16|c.1003C>T|p.Gln335*|1513/5166|1003/2613|335/870||,T|protein_protein_contact|HIGH|EPAS1|EPAS1|interaction|3F1N:A_335-B_360:NM_001430…	GT:AD:DP:GQ:PL	0/0/1:34,20:54:43:491,0,43,977
2	63664607	.	T	C	586.64	PASS	AC=1;AF=0.333;AN=3;BaseQRankSum=-2.028;ClippingRankSum=0.000;DP=91;FS=0.882;MLEAC=1;MLEAF=0.333;MQ=60.00;MQ0=0;MQRankSum=0.000;QD=6.45;ReadPosRankSum=0.649;SOR=0.911;VQSLOD=21.44;culprit=QD;ANN=C|missense_variant|MODERATE|WDPCP|WDPCP|transcript|NM_015910.5|protein_coding|8/18|c.581A>G|p.Glu194Gly|1043/3309|581/2241|194/746||	GT:AD:DP:GQ:PL	0/0/1:65,26:91:99:614,0,117,1941
2	67636299	.	A	T	324.64	PASS	AC=1;AF=0.333;AN=3;BaseQRankSum=0.479;ClippingRankSum=0.000;DP=65;FS=1.109;MLEAC=1;MLEAF=0.333;MQ=60.00;MQ0=0;MQRankSum=0.000;QD=4.99;ReadPosRankSum=-0.594;SOR=0.753;VQSLOD=21.64;culprit=QD;ANN=T|sequence_feature|MODERATE|ETAA1|ETAA1|compositionally-biased-region:Poly-Glu|NM_019002.3|protein_coding||c.2654-744A>T||||||,T|intron_variant|MODIFIER|ETAA1|ETAA1|transcript|NM_019002.3|protein_coding|5/…	GT:AD:DP:GQ:PL	0/0/1:50,15:65:99:352,0,105,1526
2	80096984	.	C	T	475.64	PASS	AC=1;AF=0.333;AN=3;BaseQRankSum=-1.183;ClippingRankSum=0.000;DP=73;FS=0.954;MLEAC=1;MLEAF=0.333;MQ=60.00;MQ0=0;MQRankSum=0.000;QD=6.52;ReadPosRankSum=-0.196;SOR=0.556;VQSLOD=21.73;culprit=QD;ANN=T|stop_gained|HIGH|CTNNA2|CTNNA2|transcript|NM_001282597.2|protein_coding|5/19|c.508C>T|p.Gln170*|787/4132|508/2862|170/953||,T|upstream_gene_variant|MODIFIER|MIR8080|MIR8080|transcript|NR_107047.1|pseudo…	GT:AD:DP:GQ:PL	0/0/1:50,23:73:82:503,0,82,1425
2	99975290	.	A	C	1470.64	PASS	AC=2;AF=0.667;AN=3;BaseQRankSum=3.094;ClippingRankSum=0.000;DP=74;FS=0.000;MLEAC=2;MLEAF=0.667;MQ=60.00;MQ0=0;MQRankSum=0.000;QD=19.87;ReadPosRankSum=-1.419;SOR=0.693;VQSLOD=21.56;culprit=MQ;ANN=C|sequence_feature|MODERATE|EIF5B|EIF5B|modified-residue:phosphoserine|NM_015904.3|protein_coding||c.36-1409A>C||||||,C|intron_variant|MODIFIER|EIF5B|EIF5B|transcript|NM_015904.3|protein_coding|1/23|c.36-…	GT:AD:DP:GQ:PL	0/1/1:24,50:74:78:1498,78,0,601
2	103317572	.	C	T	386.64	PASS	AC=1;AF=0.333;AN=3;BaseQRankSum=4.010;ClippingRankSum=0.000;DP=69;FS=10.325;MLEAC=1;MLEAF=0.333;MQ=60.00;MQ0=0;MQRankSum=0.000;QD=5.60;ReadPosRankSum=0.017;SOR=1.674;VQSLOD=21.67;culprit=QD;ANN=T|missense_variant|MODERATE|SLC9A2|SLC9A2|transcript|NM_003048.5|protein_coding|8/12|c.1630C>T|p.Arg544Trp|1945/5615|1630/2439|544/812||	GT:AD:DP:GQ:PL	0/0/1:52,17:69:99:414,0,103,1363
2	110343318	.	C	T	703.65	PASS	AC=1;AF=0.333;AN=3;BaseQRankSum=1.723;ClippingRankSum=0.000;DP=64;FS=0.985;MLEAC=1;MLEAF=0.333;MQ=60.00;MQ0=0;MQRankSum=0.000;QD=10.99;ReadPosRankSum=-0.796;SOR=0.955;VQSLOD=21.69;culprit=MQ;ANN=T|missense_variant|MODERATE|SEPT10|SEPT10|transcript|NM_001321498.1|protein_coding|3/12|c.197G>A|p.Cys66Tyr|576/3339|197/1635|66/544||	GT:AD:DP:GQ:PL	0/0/1:37,27:64:29:731,0,29,1012
2	112621109	rs11687898	A	T	573.64	PASS	AC=3;AF=1.00;AN=3;DB;DP=22;FS=0.000;MLEAC=3;MLEAF=1.00;MQ=56.55;MQ0=0;POSITIVE_TRAIN_SITE;QD=30.19;SOR=1.981;VQSLOD=6.10;culprit=MQ;ANN=T|sequence_feature|MODERATE|ANAPC1|ANAPC1|modified-residue:phosphoserine|NM_022662.3|protein_coding||c.1052+143T>A||||||,T|intron_variant|MODIFIER|ANAPC1|ANAPC1|transcript|NM_022662.3|protein_coding|9/47|c.1052+143T>A||||||	GT:AD:DP:GQ:PL	1/1/1:0,19:19:33:601,89,33,0
2	160304865	.	A	C	1439.2	PASS	AC=2;AF=0.500;AN=4;BaseQRankSum=0.993;ClippingRankSum=0.000;DP=95;FS=1.654;MLEAC=2;MLEAF=0.500;MQ=60.00;MQ0=0;MQRankSum=0.000;QD=15.15;ReadPosRankSum=-1.458;SOR=0.892;VQSLOD=21.18;culprit=MQ;ANN=C|missense_variant|MODERATE|BAZ2B|BAZ2B|transcript|NM_013450.3|protein_coding|5/37|c.390T>G|p.Phe130Leu|795/8198|390/6507|130/2168||	GT:AD:DP:GQ:PL	0/0/1/1:42,53:95:33:1466,85,0,33,1079
2	163030242	.	C	A	394.2	PASS	AC=1;AF=0.250;AN=4;BaseQRankSum=-3.315;ClippingRankSum=0.000;DP=81;FS=0.000;MLEAC=1;MLEAF=0.250;MQ=60.00;MQ0=0;MQRankSum=0.000;QD=4.87;ReadPosRankSum=1.460;SOR=0.741;VQSLOD=21.49;culprit=QD;ANN=A|missense_variant|MODERATE|FAP|FAP|transcript|NM_004460.3|protein_coding|23/26|c.2025G>T|p.Glu675Asp|2233/2786|2025/2283|675/760||,A|downstream_gene_variant|MODIFIER|LOC101929532|LOC101929532|transcript|N…	GT:AD:DP:GQ:PL	0/0/0/1:63,18:81:56:421,0,56,213,1974
2	170806324	.	C	G	595.2	PASS	AC=1;AF=0.250;AN=4;BaseQRankSum=0.618;ClippingRankSum=0.000;DP=96;FS=0.854;MLEAC=1;MLEAF=0.250;MQ=60.00;MQ0=0;MQRankSum=0.000;QD=6.20;ReadPosRankSum=-0.947;SOR=0.689;VQSLOD=21.25;culprit=QD;ANN=G|missense_variant|MODERATE|UBR3|UBR3|transcript|NM_172070.3|protein_coding|23/39|c.3294C>G|p.His1098Gln|3294/7953|3294/5667|1098/1888||	GT:AD:DP:GQ:PL	0/0/0/1:69,27:96:40:622,0,40,199,2023
2	176973733	.	G	A	436.2	PASS	AC=1;AF=0.250;AN=4;BaseQRankSum=0.930;ClippingRankSum=0.000;DP=77;FS=5.446;MLEAC=1;MLEAF=0.250;MQ=60.00;MQ0=0;MQRankSum=0.000;QD=5.66;ReadPosRankSum=1.276;SOR=1.432;VQSLOD=21.62;culprit=QD;ANN=A|missense_variant|MODERATE|HOXD11|HOXD11|transcript|NM_021192.2|protein_coding|2/2|c.880G>A|p.Glu294Lys|880/1463|880/1017|294/338||	GT:AD:DP:GQ:PL	0/0/0/1:58,19:77:45:463,0,45,186,1754
2	179634539	.	C	G	507.2	PASS	AC=1;AF=0.250;AN=4;BaseQRankSum=-0.707;ClippingRankSum=0.000;DP=99;FS=1.985;MLEAC=1;MLEAF=0.250;MQ=60.00;MQ0=0;MQRankSum=0.000;QD=5.18;ReadPosRankSum=1.907;SOR=0.587;VQSLOD=20.84;culprit=QD;ANN=G|missense_variant|MODERATE|TTN|TTN|transcript|NM_001267550.2|protein_coding|37/363|c.8769G>C|p.Met2923Ile|8994/109223|8769/107976|2923/35991||	GT:AD:DP:GQ:PL	0/0/0/1:75,23:98:62:534,0,62,245,2220
2	183050660	.	A	C	469.2	PASS	AC=1;AF=0.250;AN=4;BaseQRankSum=-0.769;ClippingRankSum=0.000;DP=94;FS=6.583;MLEAC=1;MLEAF=0.250;MQ=60.00;MQ0=0;MQRankSum=0.000;QD=4.99;ReadPosRankSum=-0.181;SOR=1.487;VQSLOD=21.51;culprit=QD;ANN=C|missense_variant|MODERATE|PDE1A|PDE1A|transcript|NM_001258312.1|protein_coding|14/16|c.1535T>G|p.Ile512Ser|1741/4903|1535/1650|512/549||	GT:AD:DP:GQ:PL	0/0/0/1:72,22:94:61:496,0,61,237,2149
2	211070475	.	C	A	919.77	PASS	AC=1;AF=0.500;AN=2;BaseQRankSum=2.259;ClippingRankSum=0.000;DP=49;ExcessHet=3.0103;FS=0.000;MLEAC=1;MLEAF=0.500;MQ=60.00;MQ0=0;MQRankSum=0.000;QD=18.77;ReadPosRankSum=0.995;SOR=0.833;VQSLOD=21.33;culprit=MQ;ANN=A|missense_variant|MODERATE|ACADL|ACADL|transcript|NM_001608.3|protein_coding|6/11|c.649G>T|p.Ala217Ser|877/2490|649/1293|217/430||	GT:AD:DP:GQ:PL	0/1:17,32:49:99:948,0,377
2	211488653	.	C	A	378.77	PASS	AC=1;AF=0.500;AN=2;BaseQRankSum=0.465;ClippingRankSum=0.000;DP=36;ExcessHet=3.0103;FS=20.414;MLEAC=1;MLEAF=0.500;MQ=60.00;MQ0=0;MQRankSum=0.000;QD=10.52;ReadPosRankSum=0.899;SOR=4.174;VQSLOD=17.09;culprit=FS;ANN=A|sequence_feature|MODERATE|CPS1|CPS1|modified-residue:Phosphoserine|NM_001122633.2|protein_coding||c.2705+7388C>A||||||,A|sequence_feature|LOW|CPS1|CPS1|turn:combinatorial_evidence_used_…	GT:AD:DP:GQ:PL	0/1:20,16:36:99:407,0,561
2	214174802	.	C	A	525.77	PASS	AC=1;AF=0.500;AN=2;BaseQRankSum=-0.078;ClippingRankSum=0.000;DP=47;ExcessHet=3.0103;FS=1.150;MLEAC=1;MLEAF=0.500;MQ=60.00;MQ0=0;MQRankSum=0.000;QD=11.19;ReadPosRankSum=-0.561;SOR=1.036;VQSLOD=21.36;culprit=MQ;ANN=A|missense_variant|MODERATE|SPAG16|SPAG16|transcript|NM_024532.4|protein_coding|4/16|c.299C>A|p.Pro100His|404/2187|299/1896|100/631||	GT:AD:DP:GQ:PL	0/1:27,20:47:99:554,0,785
2	231948329	rs199791094	A	G	1709.77	PASS	AC=2;AF=1.00;AN=2;DB;DP=54;ExcessHet=3.0103;FS=0.000;MLEAC=2;MLEAF=1.00;MQ=60.00;MQ0=0;QD=32.26;SOR=0.808;VQSLOD=19.43;culprit=MQ;ANN=G|missense_variant|MODERATE|PSMD1|PSMD1|transcript|NM_002807.3|protein_coding|14/25|c.1574A>G|p.Asn525Ser|1736/3325|1574/2862|525/953||	GT:AD:DP:GQ:PL	1/1:0,53:53:99:1738,159,0
2	238275399	.	G	T	912.77	PASS	AC=1;AF=0.500;AN=2;BaseQRankSum=-0.080;ClippingRankSum=0.000;DP=62;ExcessHet=3.0103;FS=0.000;MLEAC=1;MLEAF=0.500;MQ=60.00;MQ0=0;MQRankSum=0.000;QD=14.72;ReadPosRankSum=0.124;SOR=0.686;VQSLOD=21.75;culprit=MQ;ANN=T|missense_variant|MODERATE|COL6A3|COL6A3|transcript|NM_004369.3|protein_coding|11/44|c.5431C>A|p.Gln1811Lys|5716/10581|5431/9534|1811/3177||	GT:AD:DP:GQ:PL	0/1:27,35:62:99:941,0,662
2	242195794	.	C	A	699.77	PASS	AC=1;AF=0.500;AN=2;BaseQRankSum=-1.645;ClippingRankSum=0.000;DP=46;ExcessHet=3.0103;FS=0.000;MLEAC=1;MLEAF=0.500;MQ=60.00;MQ0=0;MQRankSum=0.000;QD=15.21;ReadPosRankSum=0.435;SOR=0.693;VQSLOD=21.37;culprit=MQ;ANN=A|missense_variant|MODERATE|HDLBP|HDLBP|transcript|NM_001320965.1|protein_coding|7/28|c.678G>T|p.Arg226Ser|971/6437|678/3807|226/1268||	GT:AD:DP:GQ:PL	0/1:26,20:46:99:728,0,1587
3	3194255	.	G	A	404.2	PASS	AC=1;AF=0.250;AN=4;BaseQRankSum=-1.727;ClippingRankSum=0.000;DP=77;FS=3.805;MLEAC=1;MLEAF=0.250;MQ=60.00;MQ0=0;MQRankSum=0.000;QD=5.39;ReadPosRankSum=1.432;SOR=0.307;VQSLOD=21.51;culprit=QD;ANN=A|missense_variant|MODERATE|CRBN|CRBN|transcript|NM_016302.3|protein_coding|10/11|c.1033C>T|p.Pro345Ser|1063/2591|1033/1329|345/442||,A|downstream_gene_variant|MODIFIER|TRNT1|TRNT1|transcript|NM_182916.2|p…	GT:AD:DP:GQ:PL	0/0/0/1:55,20:75:36:431,0,36,165,1575
3	12046131	rs74213196	A	C	244.04	PASS	AC=4;AF=1.00;AN=4;DB;DP=6;FS=0.000;MLEAC=4;MLEAF=1.00;MQ=60.00;MQ0=0;QD=33.79;SOR=3.912;VQSLOD=15.93;culprit=QD;ANN=C|missense_variant|MODERATE|SYN2|SYN2|transcript|NM_133625.4|protein_coding|1/14|c.106A>C|p.Thr36Pro|298/3345|106/1746|36/581||WARNING_TRANSCRIPT_MULTIPLE_STOP_CODONS	GT:AD:DP:GQ:PL	1/1/1/1:0,6:6:7:270,36,18,7,0
3	12046168	rs2623875	A	C	110.07	PASS	AC=4;AF=1.00;AN=4;DB;DP=3;FS=0.000;MLEAC=4;MLEAF=1.00;MQ=60.00;MQ0=0;QD=29.91;SOR=2.833;VQSLOD=18.16;culprit=DP;ANN=C|stop_lost|HIGH|SYN2|SYN2|transcript|NM_133625.4|protein_coding|1/14|c.143A>C|p.Ter48Serext*?|335/3345|143/1746|48/581||WARNING_TRANSCRIPT_MULTIPLE_STOP_CODONS	GT:AD:DP:GQ:PL	1/1/1/1:0,3:3:4:135,18,9,4,0
3	16926544	rs368284573	T	G	648.25	PASS	AC=4;AF=1.00;AN=4;DB;DP=16;FS=0.000;MLEAC=4;MLEAF=1.00;MQ=60.00;MQ0=0;QD=29.34;SOR=0.818;VQSLOD=18.58;culprit=QD;ANN=G|missense_variant|MODERATE|PLCL2|PLCL2|transcript|NM_001144382.1|protein_coding|2/8|c.9T>G|p.Asp3Glu|92/4149|9/3372|3/1123||	GT:AD:DP:GQ:PL	1/1/1/1:0,15:15:19:675,90,45,19,0
3	17052450	.	C	A	723.26	PASS	AC=1;AF=0.250;AN=4;BaseQRankSum=0.536;ClippingRankSum=0.000;DP=92;FS=0.000;MLEAC=1;MLEAF=0.250;MQ=60.00;MQ0=0;MQRankSum=0.000;QD=7.86;ReadPosRankSum=0.927;SOR=0.693;VQSLOD=21.42;culprit=MQ;ANN=A|missense_variant|MODERATE|PLCL2|PLCL2|transcript|NM_001144382.1|protein_coding|4/8|c.1600C>A|p.Leu534Ile|1683/4149|1600/3372|534/1123||	GT:AD:DP:GQ:PL	0/0/0/1:62,30:92:18:750,0,18,150,1777
3	25542776	.	G	T	504.2	PASS	AC=1;AF=0.250;AN=4;BaseQRankSum=3.687;ClippingRankSum=0.000;DP=99;FS=0.000;MLEAC=1;MLEAF=0.250;MQ=60.00;MQ0=0;MQRankSum=0.000;QD=5.09;ReadPosRankSum=1.426;SOR=0.718;VQSLOD=21.05;culprit=QD;ANN=T|missense_variant|MODERATE|RARB|RARB|transcript|NM_001290216.2|protein_coding|6/11|c.431G>T|p.Arg144Leu|922/3174|431/1368|144/455||	GT:AD:DP:GQ:PL	0/0/0/1:75,24:99:59:531,0,59,239,1965
3	37323579	.	C	A	352.2	PASS	AC=1;AF=0.250;AN=4;BaseQRankSum=1.801;ClippingRankSum=0.000;DP=100;FS=0.000;MLEAC=1;MLEAF=0.250;MQ=60.00;MQ0=0;MQRankSum=0.000;QD=3.52;ReadPosRankSum=1.836;SOR=0.592;VQSLOD=20.86;culprit=QD;ANN=A|missense_variant|MODERATE|GOLGA4|GOLGA4|transcript|NM_001172713.1|protein_coding|4/23|c.359C>A|p.Ser120Tyr|719/7868|359/6732|120/2243||	GT:AD:DP:GQ:PL	0/0/0/1:83,17:100:94:379,0,94,312,2548
3	46399227	.	G	T	484.2	PASS	AC=1;AF=0.250;AN=4;BaseQRankSum=-1.727;ClippingRankSum=0.000;DP=105;FS=4.571;MLEAC=1;MLEAF=0.250;MQ=60.00;MQ0=0;MQRankSum=0.000;QD=4.61;ReadPosRankSum=-0.537;SOR=1.336;VQSLOD=20.96;culprit=QD;ANN=T|missense_variant|MODERATE|CCR2|CCR2|transcript|NM_001123041.2|protein_coding|2/3|c.209G>T|p.Cys70Phe|694/2672|209/1125|70/374||	GT:AD:DP:GQ:PL	0/0/0/1:81,24:105:71:511,0,71,272,2440
3	49870150	.	T	G	42.79	PASS	AC=1;AF=0.500;AN=2;BaseQRankSum=-0.921;ClippingRankSum=0.000;DP=9;ExcessHet=3.0103;FS=0.000;MLEAC=1;MLEAF=0.500;MQ=60.00;MQ0=0;MQRankSum=0.000;QD=5.35;ReadPosRankSum=0.000;SOR=0.269;VQSLOD=19.13;culprit=DP;ANN=G|sequence_feature|MODERATE|TRAIP|TRAIP|modified-residue:phosphoserine|NM_005879.2|protein_coding||c.885-649A>C||||||,G|intron_variant|MODIFIER|TRAIP|TRAIP|transcript|NM_005879.2|protein_co…	GT:AD:DP:GQ:PL	0/1:2,6:8:22:71,0,22
3	51974943	.	C	G	1615.77	PASS	AC=2;AF=1.00;AN=2;DP=57;ExcessHet=3.0103;FS=0.000;MLEAC=2;MLEAF=1.00;MQ=60.00;MQ0=0;QD=28.85;SOR=1.101;VQSLOD=18.95;culprit=QD;ANN=G|sequence_feature|MODERATE|RRP9|RRP9|modified-residue:Phosphoserine|NM_004704.4|protein_coding||c.170+482G>C||||||,G|upstream_gene_variant|MODIFIER|PARP3|PARP3|transcript|NM_001003931.3|protein_coding||c.-1763C>G|||||1378|,G|intron_variant|MODIFIER|RRP9|RRP9|transcri…	GT:AD:DP:GQ:PL	1/1:0,56:56:99:1644,168,0
3	52257401	.	G	A	761.77	PASS	AC=1;AF=0.500;AN=2;BaseQRankSum=2.180;ClippingRankSum=0.000;DP=64;ExcessHet=3.0103;FS=3.454;MLEAC=1;MLEAF=0.500;MQ=60.00;MQ0=0;MQRankSum=0.000;QD=11.90;ReadPosRankSum=-0.479;SOR=0.720;VQSLOD=21.73;culprit=MQ;ANN=A|stop_gained|HIGH|TLR9|TLR9|transcript|NM_017442.3|protein_coding|2/2|c.931C>T|p.Arg311*|1565/3870|931/3099|311/1032||	GT:AD:DP:GQ:PL	0/1:35,29:64:99:790,0,932
3	58119193	.	G	A	108.77	PASS	AC=1;AF=0.500;AN=2;BaseQRankSum=-1.562;ClippingRankSum=0.000;DP=13;ExcessHet=3.0103;FS=6.892;MLEAC=1;MLEAF=0.500;MQ=60.00;MQ0=0;MQRankSum=0.000;QD=9.06;ReadPosRankSum=-1.282;SOR=2.815;VQSLOD=19.44;culprit=DP;ANN=A|sequence_feature|MODERATE|FLNB|FLNB|modified-residue:phosphoserine|NM_001164317.1|protein_coding||c.4607+535G>A||||||,A|intron_variant|MODIFIER|FLNB|FLNB|transcript|NM_001164317.1|prote…	GT:AD:DP:GQ:PL	0/1:9,3:12:99:137,0,363
3	58119194	.	C	A	66.77	PASS	AC=1;AF=0.500;AN=2;BaseQRankSum=-2.362;ClippingRankSum=0.000;DP=12;ExcessHet=3.0103;FS=3.424;MLEAC=1;MLEAF=0.500;MQ=60.00;MQ0=0;MQRankSum=0.000;QD=6.07;ReadPosRankSum=-1.231;SOR=2.272;VQSLOD=19.16;culprit=DP;ANN=A|sequence_feature|MODERATE|FLNB|FLNB|modified-residue:phosphoserine|NM_001164317.1|protein_coding||c.4607+536C>A||||||,A|intron_variant|MODIFIER|FLNB|FLNB|transcript|NM_001164317.1|prote…	GT:AD:DP:GQ:PL	0/1:9,2:11:95:95,0,455
3	68929899	.	G	A	636.77	PASS	AC=1;AF=0.500;AN=2;BaseQRankSum=-0.801;ClippingRankSum=0.000;DP=45;ExcessHet=3.0103;FS=2.594;MLEAC=1;MLEAF=0.500;MQ=60.00;MQ0=0;MQRankSum=0.000;QD=14.15;ReadPosRankSum=-0.139;SOR=0.494;VQSLOD=21.31;culprit=MQ;ANN=A|missense_variant|MODERATE|FAM19A4|FAM19A4|transcript|NM_001005527.2|protein_coding|3/6|c.112C>T|p.His38Tyr|523/2212|112/423|38/140||	GT:AD:DP:GQ:PL	0/1:20,25:45:99:665,0,539
3	69230253	.	G	A	347.77	PASS	AC=1;AF=0.500;AN=2;BaseQRankSum=2.113;ClippingRankSum=0.000;DP=52;ExcessHet=3.0103;FS=0.000;MLEAC=1;MLEAF=0.500;MQ=60.00;MQ0=0;MQRankSum=0.000;QD=6.69;ReadPosRankSum=-0.341;SOR=0.631;VQSLOD=21.51;culprit=QD;ANN=A|missense_variant|MODERATE|FRMD4B|FRMD4B|transcript|NM_015123.2|protein_coding|21/23|c.2648C>T|p.Ser883Leu|2963/6498|2648/3105|883/1034||	GT:AD:DP:GQ:PL	0/1:35,17:52:99:376,0,853
3	112299491	.	C	A	610.77	PASS	AC=1;AF=0.500;AN=2;BaseQRankSum=-0.011;ClippingRankSum=0.000;DP=49;ExcessHet=3.0103;FS=4.144;MLEAC=1;MLEAF=0.500;MQ=60.00;MQ0=0;MQRankSum=0.000;QD=12.72;ReadPosRankSum=1.413;SOR=1.192;VQSLOD=21.28;culprit=MQ;ANN=A|missense_variant|MODERATE|SLC35A5|SLC35A5|transcript|NM_017945.3|protein_coding|6/7|c.527C>A|p.Ala176Glu|810/3259|527/1275|176/424||	GT:AD:DP:GQ:PL	0/1:24,24:48:99:639,0,621
3	113723588	.	G	A	826.77	PASS	AC=1;AF=0.500;AN=2;BaseQRankSum=0.151;ClippingRankSum=0.000;DP=53;ExcessHet=3.0103;FS=2.347;MLEAC=1;MLEAF=0.500;MQ=60.00;MQ0=0;MQRankSum=0.000;QD=15.60;ReadPosRankSum=-0.172;SOR=0.768;VQSLOD=21.53;culprit=MQ;ANN=A|missense_variant|MODERATE|CCDC191|CCDC191|transcript|NM_020817.1|protein_coding|11/17|c.1874C>T|p.Pro625Leu|2021/3976|1874/2811|625/936||	GT:AD:DP:GQ:PL	0/1:22,31:53:99:855,0,548
3	125271109	.	C	A	865.77	PASS	AC=1;AF=0.500;AN=2;BaseQRankSum=-0.669;ClippingRankSum=0.000;DP=50;ExcessHet=3.0103;FS=2.522;MLEAC=1;MLEAF=0.500;MQ=60.00;MQ0=0;MQRankSum=0.000;QD=17.32;ReadPosRankSum=1.224;SOR=0.356;VQSLOD=21.29;culprit=MQ;ANN=A|stop_gained|HIGH|OSBPL11|OSBPL11|transcript|NM_022776.4|protein_coding|9/13|c.1570G>T|p.Glu524*|2307/4638|1570/2244|524/747||;LOF=(OSBPL11|OSBPL11|1|1.00);NMD=(OSBPL11|OSBPL11|1|1.00)	GT:AD:DP:GQ:PL	0/1:19,31:50:99:894,0,466
3	154147325	.	T	C	1121.64	PASS	AC=2;AF=0.667;AN=3;BaseQRankSum=-0.421;ClippingRankSum=0.000;DP=58;FS=0.000;MLEAC=2;MLEAF=0.667;MQ=60.00;MQ0=0;MQRankSum=0.000;QD=19.34;ReadPosRankSum=-1.188;SOR=0.782;VQSLOD=21.52;culprit=MQ;ANN=C|missense_variant|MODERATE|GPR149|GPR149|transcript|NM_001038705.1|protein_coding|1/4|c.80A>G|p.Asn27Ser|180/2323|80/2196|27/731||	GT:AD:DP:GQ:PL	0/1/1:17,41:58:72:1149,72,0,391
3	172607438	.	G	T	1000.64	PASS	AC=2;AF=0.667;AN=3;BaseQRankSum=1.123;ClippingRankSum=0.000;DP=64;FS=0.966;MLEAC=2;MLEAF=0.667;MQ=60.00;MQ0=0;MQRankSum=0.000;QD=15.64;ReadPosRankSum=0.132;SOR=0.803;VQSLOD=21.73;culprit=MQ;ANN=T|missense_variant|MODERATE|SPATA16|SPATA16|transcript|NM_031955.5|protein_coding|11/11|c.1632C>A|p.Phe544Leu|1816/2107|1632/1710|544/569||	GT:AD:DP:GQ:PL	0/1/1:27,37:64:31:1028,31,0,639
4	1941422	.	C	T	1120.71	PASS	AC=1;AF=0.333;AN=3;BaseQRankSum=2.411;ClippingRankSum=0.000;DP=96;FS=0.768;MLEAC=1;MLEAF=0.333;MQ=60.00;MQ0=0;MQRankSum=0.000;QD=11.67;ReadPosRankSum=0.502;SOR=0.557;VQSLOD=21.33;culprit=MQ;ANN=T|stop_gained|HIGH|WHSC1|WHSC1|transcript|NM_001042424.2|protein_coding|9/22|c.1798C>T|p.Arg600*|1974/7572|1798/4098|600/1365||;LOF=(WHSC1|WHSC1|1|1.00);NMD=(WHSC1|WHSC1|1|1.00)	GT:AD:DP:GQ:PL	0/0/1:51,45:96:18:1148,0,18,1262
4	3076659	.	A	C	196.3	PASS	AC=3;AF=1.00;AN=3;DP=17;FS=0.000;MLEAC=3;MLEAF=1.00;MQ=52.62;MQ0=0;QD=31.48;SOR=3.611;VQSLOD=2.92;culprit=MQ;ANN=C|missense_variant|MODERATE|HTT|HTT|transcript|NM_002111.8|protein_coding|1/67|c.107A>C|p.Gln36Pro|252/13475|107/9429|36/3142||,C|upstream_gene_variant|MODIFIER|HTT-AS|HTT-AS|transcript|NR_045414.1|pseudogene||n.-418T>G|||||418|	GT:AD:DP:GQ:PL	1/1/1:0,5:5:8:223,23,8,0
4	3076665	rs61792466	A	C	197.3	PASS	AC=3;AF=1.00;AN=3;DB;DP=15;FS=0.000;MLEAC=3;MLEAF=1.00;MQ=51.56;MQ0=0;QD=31.37;SOR=3.611;VQSLOD=2.39;culprit=MQ;ANN=C|missense_variant|MODERATE|HTT|HTT|transcript|NM_002111.8|protein_coding|1/67|c.113A>C|p.Gln38Pro|258/13475|113/9429|38/3142||,C|upstream_gene_variant|MODIFIER|HTT-AS|HTT-AS|transcript|NR_045414.1|pseudogene||n.-424T>G|||||424|	GT:AD:DP:GQ:PL	1/1/1:0,5:5:8:224,23,8,0
4	4304615	.	A	G	128.64	PASS	AC=1;AF=0.333;AN=3;BaseQRankSum=-2.449;ClippingRankSum=0.000;DP=85;FS=0.000;MLEAC=1;MLEAF=0.333;MQ=60.00;MQ0=0;MQRankSum=0.000;QD=1.51;ReadPosRankSum=-0.396;SOR=0.638;VQSLOD=21.52;culprit=QD;ANN=G|missense_variant|MODERATE|ZBTB49|ZBTB49|transcript|NM_145291.3|protein_coding|3/8|c.1052A>G|p.Gln351Arg|1227/2943|1052/2298|351/765||	GT:AD:DP:GQ:PL	0/0/1:74,11:85:99:156,0,189,2271
4	5713115	.	G	C	84.76	PASS	AC=2;AF=0.667;AN=3;BaseQRankSum=-0.700;ClippingRankSum=0.000;DP=9;FS=0.000;MLEAC=2;MLEAF=0.667;MQ=60.00;MQ0=0;MQRankSum=0.000;QD=9.42;ReadPosRankSum=-0.847;SOR=0.892;VQSLOD=19.14;culprit=DP;ANN=C|missense_variant|MODERATE|EVC|EVC|transcript|NM_153717.2|protein_coding|1/21|c.8G>C|p.Arg3Pro|192/6430|8/2979|3/992||,C|upstream_gene_variant|MODIFIER|EVC2|EVC2|transcript|NM_147127.4|protein_coding||c.-…	GT:AD:DP:GQ:PL	0/1/1:4,5:9:2:110,2,0,103
4	7774730	.	C	A	448.64	PASS	AC=1;AF=0.333;AN=3;BaseQRankSum=-3.560;ClippingRankSum=0.000;DP=58;FS=1.085;MLEAC=1;MLEAF=0.333;MQ=60.00;MQ0=0;MQRankSum=0.000;QD=7.74;ReadPosRankSum=-0.485;SOR=0.994;VQSLOD=21.61;culprit=MQ;ANN=A|missense_variant|MODERATE|AFAP1|AFAP1|transcript|NM_001134647.1|protein_coding|16/18|c.2070G>T|p.Lys690Asn|2343/7770|2070/2445|690/814||,A|non_coding_transcript_exon_variant|MODIFIER|AFAP1-AS1|AFAP1-AS1…	GT:AD:DP:GQ:PL	0/0/1:37,21:58:49:476,0,49,1108
4	8238080	.	C	G	434.64	PASS	AC=1;AF=0.333;AN=3;BaseQRankSum=-0.316;ClippingRankSum=0.000;DP=80;FS=2.176;MLEAC=1;MLEAF=0.333;MQ=60.00;MQ0=0;MQRankSum=0.000;QD=5.43;ReadPosRankSum=-0.195;SOR=1.127;VQSLOD=21.64;culprit=QD;ANN=G|missense_variant|MODERATE|SH3TC1|SH3TC1|transcript|NM_018986.4|protein_coding|16/18|c.3481C>G|p.Leu1161Val|3671/4349|3481/4011|1161/1336||	GT:AD:DP:GQ:PL	0/0/1:60,20:80:99:462,0,117,1646
4	15443880	.	G	T	496.64	PASS	AC=1;AF=0.333;AN=3;BaseQRankSum=-0.655;ClippingRankSum=0.000;DP=59;FS=3.866;MLEAC=1;MLEAF=0.333;MQ=60.00;MQ0=0;MQRankSum=0.000;QD=8.42;ReadPosRankSum=-1.348;SOR=1.355;VQSLOD=21.49;culprit=MQ;ANN=T|missense_variant|MODERATE|C1QTNF7|C1QTNF7|transcript|NM_001135170.1|protein_coding|3/3|c.348G>T|p.Glu116Asp|607/4518|348/891|116/296||	GT:AD:DP:GQ:PL	0/0/1:38,21:59:52:524,0,52,1123
4	17844511	.	C	A	591.64	PASS	AC=1;AF=0.333;AN=3;BaseQRankSum=-2.052;ClippingRankSum=0.000;DP=67;FS=27.637;MLEAC=1;MLEAF=0.333;MQ=60.00;MQ0=0;MQRankSum=0.000;QD=8.83;ReadPosRankSum=1.213;SOR=3.439;VQSLOD=13.51;culprit=FS;ANN=A|sequence_feature|MODERATE|NCAPG|NCAPG|modified-residue:phosphoserine|NM_022346.4|protein_coding||c.2925-414C>A||||||,A|intron_variant|MODIFIER|NCAPG|NCAPG|transcript|NM_022346.4|protein_coding|20/20|c.2…	GT:AD:DP:GQ:PL	0/0/1:43,24:67:56:619,0,56,1246
4	20482340	.	C	A	259.64	PASS	AC=1;AF=0.333;AN=3;BaseQRankSum=-2.049;ClippingRankSum=0.000;DP=50;FS=4.428;MLEAC=1;MLEAF=0.333;MQ=60.00;MQ0=0;MQRankSum=0.000;QD=5.19;ReadPosRankSum=0.098;SOR=0.780;VQSLOD=21.41;culprit=QD;ANN=A|missense_variant&splice_region_variant|MODERATE|SLIT2|SLIT2|transcript|NM_004787.3|protein_coding|6/37|c.469C>A|p.Gln157Lys|2380/8053|469/4590|157/1529||	GT:AD:DP:GQ:PL	0/0/1:36,14:50:66:287,0,66,1053
4	24564670	.	A	C	520.64	PASS	AC=1;AF=0.333;AN=3;BaseQRankSum=-0.637;ClippingRankSum=0.000;DP=80;FS=10.487;MLEAC=1;MLEAF=0.333;MQ=60.00;MQ0=0;MQRankSum=0.000;QD=6.59;ReadPosRankSum=0.166;SOR=0.987;VQSLOD=21.65;culprit=QD;ANN=C|sequence_feature|MODERATE|DHX15|DHX15|cross-link:Glycyl_lysine_isopeptide_(Lys-Gly)_(interchain_with_G-Cter_in_ubiquitin)|NM_001358.2|protein_coding||c.702-6637T>G||||||,C|intron_variant|MODIFIER|DHX15|…	GT:AD:DP:GQ:PL	0/0/1:56,23:79:98:548,0,98,1604
4	39864693	.	C	T	838.67	PASS	AC=1;AF=0.333;AN=3;BaseQRankSum=-2.106;ClippingRankSum=0.000;DP=79;FS=4.378;MLEAC=1;MLEAF=0.333;MQ=60.00;MQ0=0;MQRankSum=0.000;QD=10.62;ReadPosRankSum=0.813;SOR=1.184;VQSLOD=21.70;culprit=MQ;ANN=T|missense_variant&splice_region_variant|MODERATE|PDS5A|PDS5A|transcript|NM_001100399.1|protein_coding|25/33|c.2767G>A|p.Asp923Asn|3307/7176|2767/4014|923/1337||	GT:AD:DP:GQ:PL	0/0/1:43,36:79:22:866,0,22,1204
4	47427995	.	C	A	322.64	PASS	AC=1;AF=0.333;AN=3;BaseQRankSum=-0.599;ClippingRankSum=0.000;DP=73;FS=5.827;MLEAC=1;MLEAF=0.333;MQ=60.00;MQ0=0;MQRankSum=0.000;QD=4.42;ReadPosRankSum=-0.654;SOR=1.556;VQSLOD=21.73;culprit=QD;ANN=A|missense_variant|MODERATE|GABRB1|GABRB1|transcript|NM_000812.3|protein_coding|9/9|c.1385C>A|p.Ser462Tyr|1759/2211|1385/1425|462/474||	GT:AD:DP:GQ:PL	0/0/1:57,16:73:99:350,0,123,1732
4	55140793	.	G	A	651.64	PASS	AC=1;AF=0.333;AN=3;BaseQRankSum=-3.477;ClippingRankSum=0.000;DP=89;FS=11.343;MLEAC=1;MLEAF=0.333;MQ=60.00;MQ0=0;MQRankSum=0.000;QD=7.49;ReadPosRankSum=-0.889;SOR=1.291;VQSLOD=21.30;culprit=MQ;ANN=A|splice_donor_variant&intron_variant|HIGH|PDGFRA|PDGFRA|transcript|NM_006206.4|protein_coding|11/22|c.1653+1G>A||||||;LOF=(PDGFRA|PDGFRA|1|1.00)	GT:AD:DP:GQ:PL	0/0/1:56,31:87:77:679,0,77,1626
4	114381330	.	C	A	540.64	PASS	AC=1;AF=0.333;AN=3;BaseQRankSum=2.911;ClippingRankSum=0.000;DP=77;FS=11.782;MLEAC=1;MLEAF=0.333;MQ=60.00;MQ0=0;MQRankSum=0.000;QD=7.02;ReadPosRankSum=0.055;SOR=0.288;VQSLOD=21.38;culprit=FS;ANN=A|missense_variant|MODERATE|CAMK2D|CAMK2D|transcript|NM_001321569.1|protein_coding|18/21|c.1279G>T|p.Asp427Tyr|2138/5974|1279/1602|427/533||	GT:AD:DP:GQ:PL	0/0/1:54,23:77:92:568,0,92,1488
4	123814206	.	C	A	649.64	PASS	AC=1;AF=0.333;AN=3;BaseQRankSum=-2.011;ClippingRankSum=0.000;DP=82;FS=6.026;MLEAC=1;MLEAF=0.333;MQ=60.00;MQ0=0;MQRankSum=0.000;QD=7.92;ReadPosRankSum=0.905;SOR=0.418;VQSLOD=21.71;culprit=MQ;ANN=A|missense_variant|MODERATE|NUDT6|NUDT6|transcript|NM_007083.4|protein_coding|5/5|c.728G>T|p.Cys243Phe|762/1169|728/951|243/316||,A|sequence_feature|LOW|NUDT6|NUDT6|beta-strand:combinatorial_evidence_used_…	GT:AD:DP:GQ:PL	0/0/1:53,29:82:73:677,0,73,1553
4	156706445	.	A	T	689.64	PASS	AC=1;AF=0.333;AN=3;BaseQRankSum=1.413;ClippingRankSum=0.000;DP=63;FS=1.027;MLEAC=1;MLEAF=0.333;MQ=60.00;MQ0=0;MQRankSum=0.000;QD=11.12;ReadPosRankSum=0.611;SOR=0.527;VQSLOD=21.70;culprit=MQ;ANN=T|missense_variant|MODERATE|GUCY1B3|GUCY1B3|transcript|NM_001291951.1|protein_coding|5/15|c.327A>T|p.Leu109Phe|495/3327|327/1926|109/641||	GT:AD:DP:GQ:PL	0/0/1:42,20:62:69:717,0,69,2370
4	156706446	.	C	A	689.64	PASS	AC=1;AF=0.333;AN=3;BaseQRankSum=3.422;ClippingRankSum=0.000;DP=63;FS=1.027;MLEAC=1;MLEAF=0.333;MQ=60.00;MQ0=0;MQRankSum=0.000;QD=11.12;ReadPosRankSum=0.601;SOR=0.527;VQSLOD=21.70;culprit=MQ;ANN=A|missense_variant|MODERATE|GUCY1B3|GUCY1B3|transcript|NM_001291951.1|protein_coding|5/15|c.328C>A|p.His110Asn|496/3327|328/1926|110/641||	GT:AD:DP:GQ:PL	0/0/1:42,20:62:69:717,0,69,2370
4	156839346	.	G	T	343.64	PASS	AC=1;AF=0.333;AN=3;BaseQRankSum=1.221;ClippingRankSum=0.000;DP=53;FS=0.000;MLEAC=1;MLEAF=0.333;MQ=60.00;MQ0=0;MQRankSum=0.000;QD=6.48;ReadPosRankSum=-0.833;SOR=0.614;VQSLOD=21.48;culprit=QD;ANN=T|missense_variant|MODERATE|TDO2|TDO2|transcript|NM_005651.3|protein_coding|11/12|c.1022G>T|p.Gly341Val|1088/1703|1022/1221|341/406||	GT:AD:DP:GQ:PL	0/0/1:38,15:53:68:371,0,68,1098
4	159559195	.	C	A	676.64	PASS	AC=1;AF=0.333;AN=3;BaseQRankSum=-2.701;ClippingRankSum=0.000;DP=91;FS=1.808;MLEAC=1;MLEAF=0.333;MQ=60.00;MQ0=0;MQRankSum=0.000;QD=7.44;ReadPosRankSum=-0.471;SOR=0.747;VQSLOD=21.45;culprit=MQ;ANN=A|missense_variant|MODERATE|RXFP1|RXFP1|transcript|NM_001253727.1|protein_coding|13/18|c.1088C>A|p.Ala363Glu|1351/3932|1088/2355|363/784||	GT:AD:DP:GQ:PL	0/0/1:61,30:91:93:704,0,93,1786
4	165118797	.	C	A	373.64	PASS	AC=1;AF=0.333;AN=3;BaseQRankSum=-0.396;ClippingRankSum=0.000;DP=47;FS=4.371;MLEAC=1;MLEAF=0.333;MQ=60.00;MQ0=0;MQRankSum=0.000;QD=7.95;ReadPosRankSum=-1.444;SOR=0.283;VQSLOD=21.17;culprit=MQ;ANN=A|missense_variant|MODERATE|ANP32C|ANP32C|transcript|NM_012403.1|protein_coding|1/1|c.67G>T|p.Ala23Ser|67/705|67/705|23/234||,A|intron_variant|MODIFIER|MARCH1|MARCH1|transcript|NM_001166373.1|protein_codi…	GT:AD:DP:GQ:PL	0/0/1:31,16:47:48:401,0,48,1294
4	173150876	.	C	A	321.64	PASS	AC=1;AF=0.333;AN=3;BaseQRankSum=-1.375;ClippingRankSum=0.000;DP=60;FS=2.568;MLEAC=1;MLEAF=0.333;MQ=60.00;MQ0=0;MQRankSum=0.000;QD=5.36;ReadPosRankSum=-1.089;SOR=0.596;VQSLOD=21.48;culprit=QD;ANN=A|missense_variant|MODERATE|GALNTL6|GALNTL6|transcript|NM_001034845.2|protein_coding|3/13|c.208C>A|p.His70Asn|944/2849|208/1806|70/601||	GT:AD:DP:GQ:PL	0/0/1:45,15:60:90:349,0,90,1353
4	186551624	rs1471794	T	G	1333.64	PASS	AC=2;AF=0.667;AN=3;BaseQRankSum=-4.782;ClippingRankSum=0.000;DB;DP=82;FS=0.868;MLEAC=2;MLEAF=0.667;MQ=60.00;MQ0=0;MQRankSum=0.000;POSITIVE_TRAIN_SITE;QD=16.46;ReadPosRankSum=0.104;SOR=0.712;VQSLOD=23.38;culprit=MQ;ANN=G|sequence_feature|MODERATE|SORBS2|SORBS2|modified-residue:Phosphoserine|NM_001270771.1|protein_coding||c.1034+79A>C||||||,G|intron_variant|MODIFIER|SORBS2|SORBS2|transcript|NM_0012…	GT:AD:DP:GQ:PL	0/1/1:29,52:81:68:1361,68,0,772
5	40854522	.	G	A	559.2	PASS	AC=1;AF=0.250;AN=4;BaseQRankSum=-0.388;ClippingRankSum=0.773;DP=125;FS=0.000;MLEAC=1;MLEAF=0.250;MQ=60.00;MQ0=0;MQRankSum=0.299;QD=4.47;ReadPosRankSum=-2.200;SOR=0.634;VQSLOD=12.07;culprit=DP;ANN=A|missense_variant|MODERATE|CARD6|CARD6|transcript|NM_032587.3|protein_coding|3/3|c.3088G>A|p.Gly1030Arg|3163/4097|3088/3114|1030/1037||	GT:AD:DP:GQ:PL	0/0/0/1:97,28:125:88:586,0,88,327,2820
5	50680451	.	T	A	156.64	PASS	AC=1;AF=0.333;AN=3;BaseQRankSum=-0.873;ClippingRankSum=0.000;DP=63;FS=16.303;MLEAC=1;MLEAF=0.333;MQ=60.00;MQ0=0;MQRankSum=0.000;QD=2.49;ReadPosRankSum=0.995;SOR=4.003;VQSLOD=19.57;culprit=FS;ANN=A|missense_variant|MODERATE|ISL1|ISL1|transcript|NM_002202.2|protein_coding|2/6|c.105T>A|p.Asp35Glu|653/2717|105/1050|35/349||,A|upstream_gene_variant|MODIFIER|LOC642366|LOC642366|transcript|NR_046243.1|p…	GT:AD:DP:GQ:PL	0/0/1:53,10:63:99:184,0,129,1615
5	50680563	.	A	T	244.64	PASS	AC=1;AF=0.333;AN=3;BaseQRankSum=1.565;ClippingRankSum=0.000;DP=84;FS=8.917;MLEAC=1;MLEAF=0.333;MQ=60.00;MQ0=0;MQRankSum=0.000;QD=2.91;ReadPosRankSum=0.793;SOR=1.514;VQSLOD=21.64;culprit=QD;ANN=T|missense_variant&splice_region_variant|MODERATE|ISL1|ISL1|transcript|NM_002202.2|protein_coding|2/6|c.217A>T|p.Arg73Trp|765/2717|217/1050|73/349||,T|upstream_gene_variant|MODIFIER|LOC642366|LOC642366|tran…	GT:AD:DP:GQ:PL	0/0/1:71,13:84:99:272,0,173,2211
5	68716081	.	C	T	1719.64	PASS	AC=2;AF=0.667;AN=3;BaseQRankSum=0.826;ClippingRankSum=0.000;DP=77;FS=5.125;MLEAC=2;MLEAF=0.667;MQ=60.00;MQ0=0;MQRankSum=0.000;QD=22.33;ReadPosRankSum=0.274;SOR=0.633;VQSLOD=21.66;culprit=MQ;ANN=T|missense_variant|MODERATE|MARVELD2|MARVELD2|transcript|NM_001038603.2|protein_coding|2/7|c.869C>T|p.Pro290Leu|943/2160|869/1677|290/558||	GT:AD:DP:GQ:PL	0/1/1:20,57:77:99:1747,111,0,480
5	73188029	.	G	A	680.64	PASS	AC=1;AF=0.333;AN=3;BaseQRankSum=-0.519;ClippingRankSum=0.000;DP=80;FS=0.000;MLEAC=1;MLEAF=0.333;MQ=60.00;MQ0=0;MQRankSum=0.000;QD=8.51;ReadPosRankSum=-1.449;SOR=0.608;VQSLOD=21.57;culprit=MQ;ANN=A|missense_variant|MODERATE|ARHGEF28|ARHGEF28|transcript|NM_001080479.2|protein_coding|27/37|c.3540G>A|p.Met1180Ile|3716/6352|3540/5196|1180/1731||	GT:AD:DP:GQ:PL	0/0/1:52,28:80:72:708,0,72,1494
5	74412489	.	G	A	913.64	PASS	AC=1;AF=0.333;AN=3;BaseQRankSum=4.003;ClippingRankSum=0.000;DP=89;FS=2.849;MLEAC=1;MLEAF=0.333;MQ=60.00;MQ0=0;MQRankSum=0.000;QD=10.27;ReadPosRankSum=-0.849;SOR=0.759;VQSLOD=21.49;culprit=MQ;ANN=A|missense_variant|MODERATE|ANKRD31|ANKRD31|transcript|NM_001164443.1|protein_coding|18/25|c.3886C>T|p.Arg1296Trp|4078/6036|3886/5622|1296/1873||	GT:AD:DP:GQ:PL	0/0/1:54,35:89:55:941,0,55,1355
5	75720513	rs10070688	A	G	554.64	PASS	AC=1;AF=0.333;AN=3;BaseQRankSum=1.685;ClippingRankSum=0.000;DB;DP=75;FS=4.804;MLEAC=1;MLEAF=0.333;MQ=60.00;MQ0=0;MQRankSum=0.000;POSITIVE_TRAIN_SITE;QD=7.50;ReadPosRankSum=1.253;SOR=0.760;VQSLOD=22.82;culprit=MQ;ANN=G|sequence_feature|MODERATE|IQGAP2|IQGAP2|modified-residue:Phosphoserine|NM_006633.3|protein_coding||c.46+21097A>G||||||,G|intron_variant|MODIFIER|IQGAP2|IQGAP2|transcript|NM_006633.3…	GT:AD:DP:GQ:PL	0/0/1:49,25:74:68:582,0,68,1188
5	75732504	rs10037366	T	C	457.67	PASS	AC=1;AF=0.333;AN=3;BaseQRankSum=2.255;ClippingRankSum=0.000;DB;DP=44;FS=0.000;MLEAC=1;MLEAF=0.333;MQ=59.65;MQ0=0;MQRankSum=0.000;POSITIVE_TRAIN_SITE;QD=10.64;ReadPosRankSum=-2.088;SOR=0.418;VQSLOD=1.32;culprit=ReadPosRankSum;ANN=C|sequence_feature|MODERATE|IQGAP2|IQGAP2|modified-residue:Phosphoserine|NM_006633.3|protein_coding||c.47-24891T>C||||||,C|intron_variant|MODIFIER|IQGAP2|IQGAP2|transcrip…	GT:AD:DP:GQ:PL	0/0/1:25,18:43:21:485,0,21,700
5	75753699	rs11739486	G	A	598.64	PASS	AC=1;AF=0.333;AN=3;BaseQRankSum=1.094;ClippingRankSum=0.000;DB;DP=97;FS=1.917;MLEAC=1;MLEAF=0.333;MQ=60.00;MQ0=0;MQRankSum=0.000;POSITIVE_TRAIN_SITE;QD=6.17;ReadPosRankSum=1.205;SOR=0.456;VQSLOD=22.85;culprit=QD;ANN=A|sequence_feature|MODERATE|IQGAP2|IQGAP2|modified-residue:Phosphoserine|NM_006633.3|protein_coding||c.47-3696G>A||||||,A|intron_variant|MODIFIER|IQGAP2|IQGAP2|transcript|NM_006633.3|…	GT:AD:DP:GQ:PL	0/0/1:71,26:97:99:626,0,135,2113
5	75757207	rs10056768	T	A	655.64	PASS	AC=2;AF=0.667;AN=3;BaseQRankSum=1.138;ClippingRankSum=0.000;DB;DP=37;FS=5.123;MLEAC=2;MLEAF=0.667;MQ=60.00;MQ0=0;MQRankSum=0.000;QD=18.21;ReadPosRankSum=0.185;SOR=2.342;VQSLOD=21.03;culprit=MQ;ANN=A|sequence_feature|MODERATE|IQGAP2|IQGAP2|modified-residue:Phosphoserine|NM_006633.3|protein_coding||c.47-188T>A||||||,A|intron_variant|MODIFIER|IQGAP2|IQGAP2|transcript|NM_006633.3|protein_coding|1/35|…	GT:AD:DP:GQ:PL	0/1/1:12,24:36:36:683,36,0,295
5	78095222	.	C	A	549.64	PASS	AC=1;AF=0.333;AN=3;BaseQRankSum=-0.290;ClippingRankSum=0.000;DP=82;FS=3.291;MLEAC=1;MLEAF=0.333;MQ=60.00;MQ0=0;MQRankSum=0.000;QD=6.79;ReadPosRankSum=-1.061;SOR=0.506;VQSLOD=21.55;culprit=QD;ANN=A|sequence_feature|MODERATE|ARSB|ARSB|disulfide-bond:experimental_evidence_used_in_manual_assertion|NM_000046.3|protein_coding||c.1214-17425G>T||||||,A|intron_variant|MODIFIER|ARSB|ARSB|transcript|NM_0000…	GT:AD:DP:GQ:PL	0/0/1:56,25:81:94:577,0,94,1622
5	78533315	.	A	T	366.64	PASS	AC=1;AF=0.333;AN=3;BaseQRankSum=0.268;ClippingRankSum=0.000;DP=58;FS=0.000;MLEAC=1;MLEAF=0.333;MQ=60.00;MQ0=0;MQRankSum=0.000;QD=6.32;ReadPosRankSum=0.845;SOR=0.643;VQSLOD=21.59;culprit=QD;ANN=T|missense_variant|MODERATE|JMY|JMY|transcript|NM_152405.4|protein_coding|1/11|c.842A>T|p.Glu281Val|1391/9129|842/2967|281/988||	GT:AD:DP:GQ:PL	0/0/1:39,19:58:58:394,0,58,973
5	89923177	.	G	C	746.64	PASS	AC=1;AF=0.333;AN=3;BaseQRankSum=-5.090;ClippingRankSum=0.000;DP=87;FS=18.667;MLEAC=1;MLEAF=0.333;MQ=60.00;MQ0=0;MQRankSum=0.000;QD=8.58;ReadPosRankSum=0.628;SOR=0.520;VQSLOD=18.75;culprit=FS;ANN=C|missense_variant|MODERATE|ADGRV1|ADGRV1|transcript|NM_032119.3|protein_coding|7/90|c.822G>C|p.Glu274Asp|918/19333|822/18921|274/6306||	GT:AD:DP:GQ:PL	0/0/1:51,36:87:47:774,0,47,1455
5	101631780	.	G	T	400.64	PASS	AC=1;AF=0.333;AN=3;BaseQRankSum=-2.693;ClippingRankSum=0.000;DP=65;FS=3.743;MLEAC=1;MLEAF=0.333;MQ=60.00;MQ0=0;MQRankSum=0.000;QD=6.16;ReadPosRankSum=2.777;SOR=0.687;VQSLOD=20.99;culprit=ReadPosRankSum;ANN=T|missense_variant|MODERATE|SLCO4C1|SLCO4C1|transcript|NM_180991.4|protein_coding|1/13|c.187C>A|p.Leu63Met|474/5332|187/2175|63/724||	GT:AD:DP:GQ:PL	0/0/1:45,20:65:75:428,0,75,1596
5	123983033	.	C	G	498.64	PASS	AC=1;AF=0.333;AN=3;BaseQRankSum=0.304;ClippingRankSum=0.000;DP=59;FS=5.521;MLEAC=1;MLEAF=0.333;MQ=60.00;MQ0=0;MQRankSum=0.000;QD=8.45;ReadPosRankSum=-0.671;SOR=0.581;VQSLOD=21.69;culprit=MQ;ANN=G|missense_variant|MODERATE|ZNF608|ZNF608|transcript|NM_020747.2|protein_coding|4/9|c.3044G>C|p.Gly1015Ala|3167/5645|3044/4539|1015/1512||	GT:AD:DP:GQ:PL	0/0/1:37,22:59:46:526,0,46,1046
5	137735578	.	G	T	765.64	PASS	AC=1;AF=0.333;AN=3;BaseQRankSum=-0.757;ClippingRankSum=0.000;DP=84;FS=1.849;MLEAC=1;MLEAF=0.333;MQ=60.00;MQ0=0;MQRankSum=0.000;QD=9.11;ReadPosRankSum=-0.273;SOR=0.601;VQSLOD=21.64;culprit=MQ;ANN=T|missense_variant|MODERATE|KDM3B|KDM3B|transcript|NM_016604.3|protein_coding|11/24|c.3076G>T|p.Gly1026Cys|3276/6813|3076/5286|1026/1761||	GT:AD:DP:GQ:PL	0/0/1:53,31:84:66:793,0,66,1554
5	140077653	.	G	C	1364.64	PASS	AC=1;AF=0.333;AN=3;BaseQRankSum=-1.282;ClippingRankSum=0.000;DP=92;FS=0.000;MLEAC=1;MLEAF=0.333;MQ=60.00;MQ0=0;MQRankSum=0.000;QD=14.83;ReadPosRankSum=-1.545;SOR=0.778;VQSLOD=21.31;culprit=ReadPosRankSum;ANN=C|missense_variant|MODERATE|HARS2|HARS2|transcript|NM_012208.3|protein_coding|12/13|c.1451G>C|p.Ser484Thr|1674/2510|1451/1521|484/506||,C|upstream_gene_variant|MODIFIER|ZMAT2|ZMAT2|transcript…	GT:AD:DP:GQ:PL	0/0/1:55,37:92:54:1392,0,54,2177
5	140347253	.	C	G	655.64	PASS	AC=1;AF=0.333;AN=3;BaseQRankSum=1.521;ClippingRankSum=0.000;DP=95;FS=0.000;MLEAC=1;MLEAF=0.333;MQ=60.00;MQ0=0;MQRankSum=0.000;QD=6.90;ReadPosRankSum=-1.841;SOR=0.693;VQSLOD=21.11;culprit=ReadPosRankSum;ANN=G|missense_variant|MODERATE|PCDHAC2|PCDHAC2|transcript|NM_018899.5|protein_coding|1/4|c.902C>G|p.Ser301Trp|1507/6036|902/3024|301/1007||,G|intron_variant|MODIFIER|PCDHA1|PCDHA1|transcript|NM_01…	GT:AD:DP:GQ:PL	0/0/1:64,31:95:97:683,0,97,1583
5	140431512	.	C	A	374.64	PASS	AC=1;AF=0.333;AN=3;BaseQRankSum=-1.726;ClippingRankSum=0.000;DP=64;FS=7.687;MLEAC=1;MLEAF=0.333;MQ=60.00;MQ0=0;MQRankSum=0.000;QD=5.85;ReadPosRankSum=-1.516;SOR=1.563;VQSLOD=21.62;culprit=QD;ANN=A|missense_variant|MODERATE|PCDHB1|PCDHB1|transcript|NM_013340.3|protein_coding|1/1|c.457C>A|p.Pro153Thr|552/2587|457/2457|153/818||,A|intron_variant|MODIFIER|LOC101926905|LOC101926905|transcript|NR_10505…	GT:AD:DP:GQ:PL	0/0/1:45,19:64:79:402,0,79,1337
5	153026631	.	G	C	658.64	PASS	AC=1;AF=0.333;AN=3;BaseQRankSum=0.761;ClippingRankSum=0.000;DP=68;FS=2.062;MLEAC=1;MLEAF=0.333;MQ=60.00;MQ0=0;MQRankSum=0.000;QD=9.69;ReadPosRankSum=2.084;SOR=0.985;VQSLOD=21.34;culprit=ReadPosRankSum;ANN=C|missense_variant|MODERATE|GRIA1|GRIA1|transcript|NM_001258021.1|protein_coding|3/16|c.394G>C|p.Val132Leu|421/5422|394/2751|132/916||	GT:AD:DP:GQ:PL	0/0/1:41,27:68:42:686,0,42,1165
5	156515132	.	G	T	588.64	PASS	AC=1;AF=0.333;AN=3;BaseQRankSum=0.630;ClippingRankSum=0.000;DP=73;FS=6.712;MLEAC=1;MLEAF=0.333;MQ=60.00;MQ0=0;MQRankSum=0.000;QD=8.18;ReadPosRankSum=2.081;SOR=0.675;VQSLOD=21.49;culprit=ReadPosRankSum;ANN=T|sequence_feature|MODERATE|HAVCR2|HAVCR2|modified-residue:phosphoserine|NM_032782.4|protein_coding||c.713+820C>A||||||,T|intron_variant|MODIFIER|HAVCR2|HAVCR2|transcript|NM_032782.4|protein_cod…	GT:AD:DP:GQ:PL	0/0/1:47,25:72:67:616,0,67,1290
5	167674723	.	T	C	283.64	PASS	AC=1;AF=0.333;AN=3;BaseQRankSum=-1.427;ClippingRankSum=0.000;DP=72;FS=4.033;MLEAC=1;MLEAF=0.333;MQ=60.00;MQ0=0;MQRankSum=0.000;QD=3.99;ReadPosRankSum=2.067;SOR=0.738;VQSLOD=21.30;culprit=QD;ANN=C|missense_variant|MODERATE|TENM2|TENM2|transcript|NM_001122679.1|protein_coding|27/29|c.6752T>C|p.Val2251Ala|6752/9645|6752/8298|2251/2765||	GT:AD:DP:GQ:PL	0/0/1:55,16:71:99:311,0,115,1568
5	171583747	.	C	T	1601.64	PASS	AC=2;AF=0.667;AN=3;BaseQRankSum=1.252;ClippingRankSum=0.000;DP=87;FS=2.954;MLEAC=2;MLEAF=0.667;MQ=60.00;MQ0=0;MQRankSum=0.000;QD=18.41;ReadPosRankSum=-0.184;SOR=0.699;VQSLOD=21.52;culprit=MQ;ANN=T|missense_variant|MODERATE|STK10|STK10|transcript|NM_005990.3|protein_coding|2/19|c.202G>A|p.Glu68Lys|502/6019|202/2907|68/968||	GT:AD:DP:GQ:PL	0/1/1:31,56:87:75:1629,75,0,770
6	51672285	rs35457888	G	A	604.23	PASS	AC=3;AF=0.750;AN=4;BaseQRankSum=0.307;ClippingRankSum=0.638;DB;DP=31;FS=4.158;MLEAC=3;MLEAF=0.750;MQ=60.00;MQ0=0;MQRankSum=-0.543;QD=19.49;ReadPosRankSum=0.591;SOR=1.437;VQSLOD=12.74;culprit=MQ;ANN=A|sequence_feature|MODERATE|PKHD1|PKHD1|glycosylation-site:N-linked_(GlcNAc...)|NM_138694.3|protein_coding||c.8303-16114C>T||||||,A|intron_variant|MODIFIER|PKHD1|PKHD1|transcript|NM_138694.3|protein_co…	GT:AD:DP:GQ:PL	0/1/1/1:7,24:31:21:631,79,21,0,160
6	51672287	rs34084744	G	A	1182.53	PASS	AC=4;AF=1.00;AN=4;BaseQRankSum=-0.168;ClippingRankSum=0.056;DB;DP=31;FS=0.000;MLEAC=4;MLEAF=1.00;MQ=60.00;MQ0=0;MQRankSum=-1.398;QD=29.88;ReadPosRankSum=-0.168;SOR=0.428;VQSLOD=11.71;culprit=QD;ANN=A|sequence_feature|MODERATE|PKHD1|PKHD1|glycosylation-site:N-linked_(GlcNAc...)|NM_138694.3|protein_coding||c.8303-16116C>T||||||,A|intron_variant|MODIFIER|PKHD1|PKHD1|transcript|NM_138694.3|protein_co…	GT:AD:DP:GQ:PL	1/1/1/1:1,30:31:11:1209,149,60,11,0
6	51672289	.	G	A	133.23	PASS	AC=1;AF=0.250;AN=4;BaseQRankSum=2.008;ClippingRankSum=-0.874;DP=31;FS=4.158;MLEAC=1;MLEAF=0.250;MQ=60.00;MQ0=0;MQRankSum=1.299;QD=4.30;ReadPosRankSum=-1.016;SOR=0.611;VQSLOD=12.22;culprit=QD;ANN=A|sequence_feature|MODERATE|PKHD1|PKHD1|glycosylation-site:N-linked_(GlcNAc...)|NM_138694.3|protein_coding||c.8303-16118C>T||||||,A|intron_variant|MODIFIER|PKHD1|PKHD1|transcript|NM_138694.3|protein_codin…	GT:AD:DP:GQ:PL	0/0/0/1:24,7:31:21:160,0,21,79,631
6	51680795	.	C	T	2471.2	PASS	AC=3;AF=0.750;AN=4;BaseQRankSum=-0.274;ClippingRankSum=0.743;DP=101;FS=3.515;MLEAC=3;MLEAF=0.750;MQ=60.00;MQ0=0;MQRankSum=0.256;QD=24.47;ReadPosRankSum=0.769;SOR=0.707;VQSLOD=13.78;culprit=QD;ANN=T|sequence_feature|MODERATE|PKHD1|PKHD1|glycosylation-site:N-linked_(GlcNAc...)|NM_138694.3|protein_coding||c.8302+14864G>A||||||,T|intron_variant|MODIFIER|PKHD1|PKHD1|transcript|NM_138694.3|protein_codi…	GT:AD:DP:GQ:PL	0/1/1/1:19,82:101:87:2498,300,87,0,426
6	51684013	rs1409537	G	T	2345.2	PASS	AC=4;AF=1.00;AN=4;DB;DP=73;FS=0.000;MLEAC=4;MLEAF=1.00;MQ=60.00;MQ0=0;POSITIVE_TRAIN_SITE;QD=32.13;SOR=0.776;VQSLOD=21.13;culprit=MQ;ANN=T|sequence_feature|MODERATE|PKHD1|PKHD1|glycosylation-site:N-linked_(GlcNAc...)|NM_138694.3|protein_coding||c.8302+11646C>A||||||,T|intron_variant|MODIFIER|PKHD1|PKHD1|transcript|NM_138694.3|protein_coding|52/66|c.8302+11646C>A||||||	GT:AD:DP:GQ:PL	1/1/1/1:0,73:73:91:2372,435,218,91,0
6	56354381	.	C	G	585.64	PASS	AC=1;AF=0.333;AN=3;BaseQRankSum=-3.259;ClippingRankSum=0.000;DP=79;FS=1.960;MLEAC=1;MLEAF=0.333;MQ=60.00;MQ0=0;MQRankSum=0.000;QD=7.41;ReadPosRankSum=0.672;SOR=1.027;VQSLOD=21.65;culprit=MQ;ANN=G|missense_variant|MODERATE|DST|DST|transcript|NM_001144769.2|protein_coding|80/97|c.14427G>C|p.Met4809Ile|14468/18087|14427/17028|4809/5675||	GT:AD:DP:GQ:PL	0/0/1:51,28:79:70:613,0,70,1482
6	109197409	.	G	T	1962.64	PASS	AC=2;AF=0.667;AN=3;BaseQRankSum=0.465;ClippingRankSum=0.000;DP=98;FS=5.733;MLEAC=2;MLEAF=0.667;MQ=60.00;MQ0=0;MQRankSum=0.000;QD=20.03;ReadPosRankSum=0.328;SOR=1.352;VQSLOD=21.28;culprit=MQ;ANN=T|missense_variant|MODERATE|ARMC2|ARMC2|transcript|NM_032131.5|protein_coding|5/18|c.527G>T|p.Gly176Val|701/3736|527/2604|176/867||	GT:AD:DP:GQ:PL	0/1/1:30,68:98:99:1990,115,0,719
6	116938229	.	A	C	1249.64	PASS	AC=2;AF=0.667;AN=3;BaseQRankSum=-1.145;ClippingRankSum=0.000;DP=75;FS=4.737;MLEAC=2;MLEAF=0.667;MQ=60.00;MQ0=0;MQRankSum=0.000;QD=16.89;ReadPosRankSum=-0.438;SOR=1.276;VQSLOD=21.78;culprit=MQ;ANN=C|missense_variant|MODERATE|RSPH4A|RSPH4A|transcript|NM_001010892.2|protein_coding|1/6|c.443A>C|p.Asn148Thr|588/2840|443/2151|148/716||	GT:AD:DP:GQ:PL	0/1/1:27,47:74:58:1277,58,0,686
6	117715410	.	C	A	804.64	PASS	AC=1;AF=0.333;AN=3;BaseQRankSum=0.349;ClippingRankSum=0.000;DP=80;FS=0.000;MLEAC=1;MLEAF=0.333;MQ=60.00;MQ0=0;MQRankSum=0.000;QD=10.19;ReadPosRankSum=-0.441;SOR=0.716;VQSLOD=21.75;culprit=MQ;ANN=A|missense_variant|MODERATE|ROS1|ROS1|transcript|NM_002944.2|protein_coding|10/43|c.1079G>T|p.Arg360Ile|1278/7368|1079/7044|360/2347||	GT:AD:DP:GQ:PL	0/0/1:47,32:79:43:832,0,43,1283
6	143755035	.	A	C	499.2	PASS	AC=1;AF=0.250;AN=4;BaseQRankSum=-0.057;ClippingRankSum=-0.127;DP=93;FS=2.007;MLEAC=1;MLEAF=0.250;MQ=60.00;MQ0=0;MQRankSum=0.514;QD=5.37;ReadPosRankSum=0.663;SOR=0.994;VQSLOD=14.14;culprit=QD;ANN=C|missense_variant|MODERATE|ADAT2|ADAT2|transcript|NM_182503.2|protein_coding|3/6|c.285T>G|p.Phe95Leu|331/6253|285/576|95/191||	GT:AD:DP:GQ:PL	0/0/0/1:69,24:93:51:526,0,51,216,2055
7	4783511	rs11762856	T	C	367.61	PASS	AC=2;AF=0.667;AN=3;BaseQRankSum=-1.240;ClippingRankSum=-1.736;DB;DP=21;FS=0.000;MLEAC=2;MLEAF=0.667;MQ=60.00;MQ0=0;MQRankSum=-1.488;POSITIVE_TRAIN_SITE;QD=26.26;ReadPosRankSum=0.248;SOR=1.061;VQSLOD=13.19;culprit=QD;ANN=C|sequence_feature|MODERATE|FOXK1|FOXK1|modified-residue:phosphoserine|NM_001037165.1|protein_coding||c.746+2857T>C||||||,C|intron_variant|MODIFIER|FOXK1|FOXK1|transcript|NM_00103…	GT:AD:DP:GQ:PL	0/1/1:1,13:14:6:394,35,0,6
7	6634162	.	T	G	652.64	PASS	AC=1;AF=0.333;AN=3;BaseQRankSum=1.705;ClippingRankSum=0.785;DP=85;FS=1.908;MLEAC=1;MLEAF=0.333;MQ=60.00;MQ0=0;MQRankSum=-1.580;QD=7.77;ReadPosRankSum=0.488;SOR=0.896;VQSLOD=13.67;culprit=MQ;ANN=G|missense_variant|MODERATE|C7orf26|C7orf26|transcript|NM_024067.3|protein_coding|3/6|c.511T>G|p.Phe171Val|774/2178|511/1350|171/449||	GT:AD:DP:GQ:PL	0/0/1:57,27:84:89:680,0,89,1619
7	27204503	.	C	T	442.64	PASS	AC=1;AF=0.333;AN=3;BaseQRankSum=3.174;ClippingRankSum=-0.140;DP=73;FS=5.464;MLEAC=1;MLEAF=0.333;MQ=60.00;MQ0=0;MQRankSum=-0.530;QD=6.06;ReadPosRankSum=-0.201;SOR=1.447;VQSLOD=13.94;culprit=QD;ANN=T|missense_variant|MODERATE|HOXA9|HOXA9|transcript|NM_152739.3|protein_coding|1/2|c.574G>A|p.Asp192Asn|647/2057|574/819|192/272||,T|upstream_gene_variant|MODIFIER|HOXA10-AS|HOXA10-AS|transcript|NR_046609…	GT:AD:DP:GQ:PL	0/0/1:52,21:73:93:470,0,93,1360
7	36910028	.	C	A	499.64	PASS	AC=1;AF=0.333;AN=3;BaseQRankSum=1.444;ClippingRankSum=0.725;DP=73;FS=2.162;MLEAC=1;MLEAF=0.333;MQ=60.00;MQ0=0;MQRankSum=-0.311;QD=6.84;ReadPosRankSum=2.577;SOR=1.029;VQSLOD=13.99;culprit=ReadPosRankSum;ANN=A|missense_variant|MODERATE|ELMO1|ELMO1|transcript|NM_001206480.2|protein_coding|20/22|c.1875G>T|p.Met625Ile|2415/5369|1875/2184|625/727||	GT:AD:DP:GQ:PL	0/0/1:52,21:73:93:527,0,93,1548
7	44611227	.	G	A	769.64	PASS	AC=1;AF=0.333;AN=3;BaseQRankSum=-2.276;ClippingRankSum=0.872;DP=86;FS=11.288;MLEAC=1;MLEAF=0.333;MQ=60.00;MQ0=0;MQRankSum=-0.630;QD=8.95;ReadPosRankSum=1.493;SOR=0.549;VQSLOD=14.12;culprit=MQ;ANN=A|missense_variant|MODERATE|DDX56|DDX56|transcript|NM_019082.3|protein_coding|6/14|c.754C>T|p.Leu252Phe|1397/2872|754/1644|252/547||	GT:AD:DP:GQ:PL	0/0/1:55,31:86:72:797,0,72,1612
7	48318478	.	C	A	569.64	PASS	AC=1;AF=0.333;AN=3;BaseQRankSum=-0.657;ClippingRankSum=-0.950;DP=75;FS=0.940;MLEAC=1;MLEAF=0.333;MQ=60.00;MQ0=0;MQRankSum=0.253;QD=7.60;ReadPosRankSum=1.894;SOR=0.938;VQSLOD=14.20;culprit=ReadPosRankSum;ANN=A|missense_variant|MODERATE|ABCA13|ABCA13|transcript|NM_152701.4|protein_coding|18/62|c.7687C>A|p.Gln2563Lys|7711/17184|7687/15177|2563/5058||	GT:AD:DP:GQ:PL	0/0/1:50,25:75:75:597,0,75,1403
7	80433487	.	C	A	544.2	PASS	AC=1;AF=0.250;AN=4;BaseQRankSum=1.885;ClippingRankSum=0.000;DP=88;FS=0.000;MLEAC=1;MLEAF=0.250;MQ=60.00;MQ0=0;MQRankSum=0.000;QD=6.18;ReadPosRankSum=0.673;SOR=0.745;VQSLOD=21.54;culprit=QD;ANN=A|stop_gained|HIGH|SEMA3C|SEMA3C|transcript|NM_006379.3|protein_coding|8/18|c.736G>T|p.Glu246*|1298/5174|736/2256|246/751||;LOF=(SEMA3C|SEMA3C|1|1.00);NMD=(SEMA3C|SEMA3C|1|1.00)	GT:AD:DP:GQ:PL	0/0/0/1:65,23:88:44:571,0,44,197,1907
7	82544404	.	C	T	414.2	PASS	AC=1;AF=0.250;AN=4;BaseQRankSum=1.179;ClippingRankSum=0.000;DP=95;FS=0.000;MLEAC=1;MLEAF=0.250;MQ=60.00;MQ0=0;MQRankSum=0.000;QD=4.36;ReadPosRankSum=1.380;SOR=0.636;VQSLOD=21.19;culprit=QD;ANN=T|missense_variant|MODERATE|PCLO|PCLO|transcript|NM_033026.5|protein_coding|7/25|c.12898G>A|p.Gly4300Arg|13187/20288|12898/15429|4300/5142||	GT:AD:DP:GQ:PL	0/0/0/1:76,19:95:76:441,0,76,268,2305
7	82581620	.	C	A	598.2	PASS	AC=1;AF=0.250;AN=4;BaseQRankSum=0.550;ClippingRankSum=0.000;DP=92;FS=3.085;MLEAC=1;MLEAF=0.250;MQ=60.00;MQ0=0;MQRankSum=0.000;QD=6.50;ReadPosRankSum=0.101;SOR=0.981;VQSLOD=21.43;culprit=QD;ANN=A|missense_variant|MODERATE|PCLO|PCLO|transcript|NM_033026.5|protein_coding|5/25|c.8649G>T|p.Trp2883Cys|8938/20288|8649/15429|2883/5142||	GT:AD:DP:GQ:PL	0/0/0/1:66,26:92:38:625,0,38,190,1949
7	87908723	.	G	A	598.2	PASS	AC=1;AF=0.250;AN=4;BaseQRankSum=2.587;ClippingRankSum=0.000;DP=91;FS=0.929;MLEAC=1;MLEAF=0.250;MQ=60.00;MQ0=0;MQRankSum=0.000;QD=6.57;ReadPosRankSum=-0.401;SOR=0.488;VQSLOD=21.47;culprit=QD;ANN=A|missense_variant|MODERATE|STEAP4|STEAP4|transcript|NM_001205315.1|protein_coding|6/6|c.1370C>T|p.Ser457Leu|1593/4572|1370/1380|457/459||	GT:AD:DP:GQ:PL	0/0/0/1:66,25:91:40:625,0,40,193,1902
7	100086595	.	G	T	282.2	PASS	AC=1;AF=0.250;AN=4;BaseQRankSum=-0.135;ClippingRankSum=0.000;DP=86;FS=3.943;MLEAC=1;MLEAF=0.250;MQ=60.00;MQ0=0;MQRankSum=0.000;QD=3.28;ReadPosRankSum=-1.111;SOR=0.729;VQSLOD=21.41;culprit=QD;ANN=T|missense_variant|MODERATE|NYAP1|NYAP1|transcript|NM_173564.3|protein_coding|4/7|c.1251G>T|p.Gln417His|1410/3583|1251/2526|417/841||	GT:AD:DP:GQ:PL	0/0/0/1:70,16:86:75:309,0,75,254,1973
7	100549512	rs77667788	A	T	3885.2	PASS	AC=2;AF=0.500;AN=4;BaseQRankSum=-1.312;ClippingRankSum=0.000;DB;DP=195;FS=3.377;MLEAC=2;MLEAF=0.500;MQ=60.00;MQ0=0;MQRankSum=0.000;QD=19.92;ReadPosRankSum=-1.145;SOR=0.976;VQSLOD=11.07;culprit=DP;ANN=T|missense_variant|MODERATE|MUC3A|MUC3A|transcript|NM_005960.1|protein_coding|2/13|c.93A>T|p.Gln31His|298/5837|93/4461|31/1486||	GT:AD:DP:GQ:PL	0/0/1/1:99,96:195:99:3912,125,0,128,3917
7	100549516	rs76951301	C	A	3817.2	PASS	AC=2;AF=0.500;AN=4;BaseQRankSum=-3.316;ClippingRankSum=0.000;DB;DP=198;FS=1.795;MLEAC=2;MLEAF=0.500;MQ=60.00;MQ0=0;MQRankSum=0.000;QD=19.28;ReadPosRankSum=-1.825;SOR=0.840;VQSLOD=10.39;culprit=DP;ANN=A|missense_variant|MODERATE|MUC3A|MUC3A|transcript|NM_005960.1|protein_coding|2/13|c.97C>A|p.Pro33Thr|302/5837|97/4461|33/1486||	GT:AD:DP:GQ:PL	0/0/1/1:100,98:198:99:3844,115,0,139,4069
7	100549537	rs75781078	G	A	3550.2	PASS	AC=2;AF=0.500;AN=4;BaseQRankSum=-2.646;ClippingRankSum=0.000;DB;DP=191;FS=1.145;MLEAC=2;MLEAF=0.500;MQ=60.00;MQ0=0;MQRankSum=0.000;QD=18.59;ReadPosRankSum=-0.521;SOR=0.813;VQSLOD=11.82;culprit=DP;ANN=A|missense_variant|MODERATE|MUC3A|MUC3A|transcript|NM_005960.1|protein_coding|2/13|c.118G>A|p.Ala40Thr|323/5837|118/4461|40/1486||	GT:AD:DP:GQ:PL	0/0/1/1:102,89:191:88:3577,88,0,164,4297
7	100549540	.	A	C	3721.2	PASS	AC=2;AF=0.500;AN=4;BaseQRankSum=-4.230;ClippingRankSum=0.000;DP=199;FS=1.111;MLEAC=2;MLEAF=0.500;MQ=60.00;MQ0=0;MQRankSum=0.000;QD=18.70;ReadPosRankSum=-0.053;SOR=0.803;VQSLOD=10.48;culprit=DP;ANN=C|missense_variant|MODERATE|MUC3A|MUC3A|transcript|NM_005960.1|protein_coding|2/13|c.121A>C|p.Ser41Arg|326/5837|121/4461|41/1486||	GT:AD:DP:GQ:PL	0/0/1/1:107,92:199:99:3748,102,0,154,4243
7	100549547	rs77743944	T	C	3712.2	PASS	AC=2;AF=0.500;AN=4;BaseQRankSum=3.152;ClippingRankSum=0.000;DB;DP=200;FS=2.443;MLEAC=2;MLEAF=0.500;MQ=60.00;MQ0=0;MQRankSum=0.000;QD=18.56;ReadPosRankSum=-0.510;SOR=0.528;VQSLOD=10.31;culprit=DP;ANN=C|missense_variant|MODERATE|MUC3A|MUC3A|transcript|NM_005960.1|protein_coding|2/13|c.128T>C|p.Val43Ala|333/5837|128/4461|43/1486||	GT:AD:DP:GQ:PL	0/0/1/1:104,96:200:97:3739,97,0,163,4442
7	100549573	rs73163748	G	T	3894.2	PASS	AC=2;AF=0.500;AN=4;BaseQRankSum=-1.234;ClippingRankSum=0.000;DB;DP=201;FS=5.848;MLEAC=2;MLEAF=0.500;MQ=60.00;MQ0=0;MQRankSum=0.000;QD=19.37;ReadPosRankSum=0.649;SOR=0.699;VQSLOD=10.27;culprit=DP;ANN=T|missense_variant|MODERATE|MUC3A|MUC3A|transcript|NM_005960.1|protein_coding|2/13|c.154G>T|p.Asp52Tyr|359/5837|154/4461|52/1486||	GT:AD:DP:GQ:PL	0/0/1/1:104,97:201:99:3921,117,0,141,4645
7	100549583	rs73163749	G	A	3822.2	PASS	AC=2;AF=0.500;AN=4;BaseQRankSum=1.838;ClippingRankSum=0.000;DB;DP=196;FS=8.041;MLEAC=2;MLEAF=0.500;MQ=60.00;MQ0=0;MQRankSum=0.000;QD=19.50;ReadPosRankSum=0.495;SOR=0.816;VQSLOD=11.43;culprit=DP;ANN=A|missense_variant|MODERATE|MUC3A|MUC3A|transcript|NM_005960.1|protein_coding|2/13|c.164G>A|p.Gly55Glu|369/5837|164/4461|55/1486||	GT:AD:DP:GQ:PL	0/0/1/1:99,97:196:99:3849,118,0,133,4671
7	100549592	rs73163750	T	A	3675.2	PASS	AC=2;AF=0.500;AN=4;BaseQRankSum=-4.597;ClippingRankSum=0.000;DB;DP=185;FS=7.288;MLEAC=2;MLEAF=0.500;MQ=60.00;MQ0=0;MQRankSum=0.000;QD=19.87;ReadPosRankSum=-0.162;SOR=0.825;VQSLOD=13.13;culprit=DP;ANN=A|missense_variant|MODERATE|MUC3A|MUC3A|transcript|NM_005960.1|protein_coding|2/13|c.173T>A|p.Leu58His|378/5837|173/4461|58/1486||	GT:AD:DP:GQ:PL	0/0/1/1:90,95:185:99:3702,119,0,119,4399
7	100549894	rs78007565	T	C	3800.2	PASS	AC=2;AF=0.500;AN=4;BaseQRankSum=0.546;ClippingRankSum=0.000;DB;DP=173;FS=0.000;MLEAC=2;MLEAF=0.500;MQ=60.00;MQ0=0;MQRankSum=0.000;QD=21.97;ReadPosRankSum=-0.636;SOR=0.739;VQSLOD=14.44;culprit=DP;ANN=C|missense_variant|MODERATE|MUC3A|MUC3A|transcript|NM_005960.1|protein_coding|2/13|c.475T>C|p.Ser159Pro|680/5837|475/4461|159/1486||	GT:AD:DP:GQ:PL	0/0/1/1:78,95:173:64:3827,155,0,64,4465
7	100549935	rs73714229	T	G	3490.2	PASS	AC=2;AF=0.500;AN=4;BaseQRankSum=-2.262;ClippingRankSum=0.000;DB;DP=173;FS=0.000;MLEAC=2;MLEAF=0.500;MQ=60.00;MQ0=0;MQRankSum=0.000;QD=20.17;ReadPosRankSum=-0.033;SOR=0.713;VQSLOD=14.53;culprit=DP;ANN=G|missense_variant|MODERATE|MUC3A|MUC3A|transcript|NM_005960.1|protein_coding|2/13|c.516T>G|p.Ser172Arg|721/5837|516/4461|172/1486||	GT:AD:DP:GQ:PL	0/0/1/1:85,88:173:99:3517,118,0,103,4940
7	100549942	rs73714230	T	C	3652.2	PASS	AC=2;AF=0.500;AN=4;BaseQRankSum=-0.298;ClippingRankSum=0.000;DB;DP=178;FS=1.169;MLEAC=2;MLEAF=0.500;MQ=60.00;MQ0=0;MQRankSum=0.000;QD=20.52;ReadPosRankSum=-0.794;SOR=0.826;VQSLOD=13.74;culprit=DP;ANN=C|missense_variant|MODERATE|MUC3A|MUC3A|transcript|NM_005960.1|protein_coding|2/13|c.523T>C|p.Ser175Pro|728/5837|523/4461|175/1486||	GT:AD:DP:GQ:PL	0/0/1/1:84,94:178:99:3679,126,0,102,4972
7	100549979	rs73398717	C	T	2792.2	PASS	AC=2;AF=0.500;AN=4;BaseQRankSum=1.174;ClippingRankSum=0.000;DB;DP=166;FS=1.198;MLEAC=2;MLEAF=0.500;MQ=60.00;MQ0=0;MQRankSum=0.000;QD=16.82;ReadPosRankSum=-0.078;SOR=0.694;VQSLOD=15.55;culprit=DP;ANN=T|missense_variant|MODERATE|MUC3A|MUC3A|transcript|NM_005960.1|protein_coding|2/13|c.560C>T|p.Thr187Ile|765/5837|560/4461|187/1486||	GT:AD:DP:GQ:PL	0/0/1/1:80,86:166:89:2819,117,0,89,4356
7	100551646	rs77153975	A	G	3919.2	PASS	AC=2;AF=0.500;AN=4;BaseQRankSum=5.347;ClippingRankSum=0.000;DB;DP=191;FS=1.119;MLEAC=2;MLEAF=0.500;MQ=60.00;MQ0=0;MQRankSum=0.000;QD=20.52;ReadPosRankSum=0.262;SOR=0.797;VQSLOD=11.73;culprit=DP;ANN=G|missense_variant|MODERATE|MUC3A|MUC3A|transcript|NM_005960.1|protein_coding|2/13|c.2227A>G|p.Thr743Ala|2432/5837|2227/4461|743/1486||	GT:AD:DP:GQ:PL	0/0/1/1:93,98:191:99:3946,131,0,117,3811
7	100551662	rs78684063	C	T	4111.2	PASS	AC=2;AF=0.500;AN=4;BaseQRankSum=8.885;ClippingRankSum=0.000;DB;DP=192;FS=8.208;MLEAC=2;MLEAF=0.500;MQ=60.00;MQ0=0;MQRankSum=0.000;QD=21.41;ReadPosRankSum=0.413;SOR=0.669;VQSLOD=12.05;culprit=DP;ANN=T|missense_variant|MODERATE|MUC3A|MUC3A|transcript|NM_005960.1|protein_coding|2/13|c.2243C>T|p.Thr748Met|2448/5837|2243/4461|748/1486||	GT:AD:DP:GQ:PL	0/0/1/1:90,102:192:86:4138,158,0,86,3463
7	100551692	rs73714242	C	T	4266.2	PASS	AC=2;AF=0.500;AN=4;BaseQRankSum=0.317;ClippingRankSum=0.000;DB;DP=204;FS=0.514;MLEAC=2;MLEAF=0.500;MQ=60.00;MQ0=0;MQRankSum=0.000;QD=20.91;ReadPosRankSum=1.276;SOR=0.729;VQSLOD=9.38;culprit=DP;ANN=T|missense_variant|MODERATE|MUC3A|MUC3A|transcript|NM_005960.1|protein_coding|2/13|c.2273C>T|p.Ala758Val|2478/5837|2273/4461|758/1486||	GT:AD:DP:GQ:PL	0/0/1/1:95,109:204:98:4293,160,0,98,3714
7	100551719	rs73714243	C	T	4460.2	PASS	AC=2;AF=0.500;AN=4;BaseQRankSum=6.272;ClippingRankSum=0.000;DB;DP=206;FS=2.401;MLEAC=2;MLEAF=0.500;MQ=60.00;MQ0=0;MQRankSum=0.000;QD=21.65;ReadPosRankSum=-0.846;SOR=0.841;VQSLOD=9.08;culprit=DP;ANN=T|missense_variant|MODERATE|MUC3A|MUC3A|transcript|NM_005960.1|protein_coding|2/13|c.2300C>T|p.Thr767Met|2505/5837|2300/4461|767/1486||	GT:AD:DP:GQ:PL	0/0/1/1:91,115:206:71:4487,190,0,71,3444
7	100551773	rs73398734	C	A	4780.2	PASS	AC=2;AF=0.500;AN=4;BaseQRankSum=6.452;ClippingRankSum=0.000;DB;DP=201;FS=1.778;MLEAC=2;MLEAF=0.500;MQ=60.00;MQ0=0;MQRankSum=0.000;QD=23.90;ReadPosRankSum=-1.640;SOR=0.860;VQSLOD=9.71;culprit=DP;ANN=A|missense_variant|MODERATE|MUC3A|MUC3A|transcript|NM_005960.1|protein_coding|2/13|c.2354C>A|p.Thr785Lys|2559/5837|2354/4461|785/1486||	GT:AD:DP:GQ:PL	0/0/1/1:79,121:200:28:4807,223,0,28,2995
7	100551778	rs73714247	G	A	4805.2	PASS	AC=2;AF=0.500;AN=4;BaseQRankSum=7.149;ClippingRankSum=0.000;DB;DP=201;FS=3.239;MLEAC=2;MLEAF=0.500;MQ=60.00;MQ0=0;MQRankSum=0.000;QD=23.91;ReadPosRankSum=-0.302;SOR=0.932;VQSLOD=9.91;culprit=DP;ANN=A|missense_variant|MODERATE|MUC3A|MUC3A|transcript|NM_005960.1|protein_coding|2/13|c.2359G>A|p.Val787Met|2564/5837|2359/4461|787/1486||	GT:AD:DP:GQ:PL	0/0/1/1:82,119:201:35:4832,221,0,35,3081
7	100551793	rs73398735	G	T	4564.2	PASS	AC=2;AF=0.500;AN=4;BaseQRankSum=1.217;ClippingRankSum=0.000;DB;DP=196;FS=3.275;MLEAC=2;MLEAF=0.500;MQ=60.00;MQ0=0;MQRankSum=0.000;QD=23.29;ReadPosRankSum=0.959;SOR=0.876;VQSLOD=10.68;culprit=DP;ANN=T|missense_variant|MODERATE|MUC3A|MUC3A|transcript|NM_005960.1|protein_coding|2/13|c.2374G>T|p.Val792Phe|2579/5837|2374/4461|792/1486||	GT:AD:DP:GQ:PL	0/0/1/1:79,117:196:36:4591,213,0,36,2959
7	100551842	rs75365561	C	T	4664.2	PASS	AC=2;AF=0.500;AN=4;BaseQRankSum=-2.739;ClippingRankSum=0.000;DB;DP=200;FS=3.226;MLEAC=2;MLEAF=0.500;MQ=60.00;MQ0=0;MQRankSum=0.000;QD=23.32;ReadPosRankSum=1.851;SOR=0.877;VQSLOD=9.77;culprit=DP;ANN=T|missense_variant|MODERATE|MUC3A|MUC3A|transcript|NM_005960.1|protein_coding|2/13|c.2423C>T|p.Thr808Ile|2628/5837|2423/4461|808/1486||	GT:AD:DP:GQ:PL	0/0/1/1:83,117:200:45:4691,207,0,45,3172
7	100552018	rs76249962	T	G	4294.2	PASS	AC=2;AF=0.500;AN=4;BaseQRankSum=-3.385;ClippingRankSum=0.000;DB;DP=199;FS=0.000;MLEAC=2;MLEAF=0.500;MQ=60.00;MQ0=0;MQRankSum=0.000;QD=21.58;ReadPosRankSum=1.266;SOR=0.669;VQSLOD=10.20;culprit=DP;ANN=G|missense_variant|MODERATE|MUC3A|MUC3A|transcript|NM_005960.1|protein_coding|2/13|c.2599T>G|p.Ser867Ala|2804/5837|2599/4461|867/1486||	GT:AD:DP:GQ:PL	0/0/1/1:92,107:199:92:4321,164,0,92,4235
7	100552371	rs73714255	C	G	4249.2	PASS	AC=2;AF=0.500;AN=4;BaseQRankSum=2.416;ClippingRankSum=0.000;DB;DP=202;FS=0.511;MLEAC=2;MLEAF=0.500;MQ=60.00;MQ0=0;MQRankSum=0.000;QD=21.04;ReadPosRankSum=0.928;SOR=0.653;VQSLOD=9.77;culprit=DP;ANN=G|missense_variant|MODERATE|MUC3A|MUC3A|transcript|NM_005960.1|protein_coding|2/13|c.2952C>G|p.Ile984Met|3157/5837|2952/4461|984/1486||	GT:AD:DP:GQ:PL	0/0/1/1:96,106:202:99:4276,152,0,109,3871
7	100552384	rs75597914	A	G	4216.2	PASS	AC=2;AF=0.500;AN=4;BaseQRankSum=0.841;ClippingRankSum=0.000;DB;DP=199;FS=1.093;MLEAC=2;MLEAF=0.500;MQ=60.00;MQ0=0;MQRankSum=0.000;QD=21.19;ReadPosRankSum=0.171;SOR=0.786;VQSLOD=10.36;culprit=DP;ANN=G|missense_variant|MODERATE|MUC3A|MUC3A|transcript|NM_005960.1|protein_coding|2/13|c.2965A>G|p.Thr989Ala|3170/5837|2965/4461|989/1486||	GT:AD:DP:GQ:PL	0/0/1/1:94,105:199:99:4243,154,0,102,3748
7	100552390	rs73714257	T	C	4162.2	PASS	AC=2;AF=0.500;AN=4;BaseQRankSum=-0.491;ClippingRankSum=0.000;DB;DP=205;FS=0.510;MLEAC=2;MLEAF=0.500;MQ=60.00;MQ0=0;MQRankSum=0.000;QD=20.30;ReadPosRankSum=-0.048;SOR=0.740;VQSLOD=9.38;culprit=DP;ANN=C|missense_variant|MODERATE|MUC3A|MUC3A|transcript|NM_005960.1|protein_coding|2/13|c.2971T>C|p.Tyr991His|3176/5837|2971/4461|991/1486||	GT:AD:DP:GQ:PL	0/0/1/1:98,107:205:99:4189,144,0,116,3919
7	100552412	rs73714259	T	C	4261.2	PASS	AC=2;AF=0.500;AN=4;BaseQRankSum=-6.765;ClippingRankSum=0.000;DB;DP=214;FS=2.349;MLEAC=2;MLEAF=0.500;MQ=60.00;MQ0=0;MQRankSum=0.000;QD=19.91;ReadPosRankSum=-0.507;SOR=0.896;VQSLOD=7.76;culprit=DP;ANN=C|missense_variant|MODERATE|MUC3A|MUC3A|transcript|NM_005960.1|protein_coding|2/13|c.2993T>C|p.Met998Thr|3198/5837|2993/4461|998/1486||	GT:AD:DP:GQ:PL	0/0/1/1:107,107:214:99:4288,137,0,137,4288
7	100552435	rs76244845	T	A	4223.2	PASS	AC=2;AF=0.500;AN=4;BaseQRankSum=-0.313;ClippingRankSum=0.000;DB;DP=220;FS=3.065;MLEAC=2;MLEAF=0.500;MQ=60.00;MQ0=0;MQRankSum=0.000;QD=19.20;ReadPosRankSum=-1.159;SOR=0.912;VQSLOD=6.60;culprit=DP;ANN=A|missense_variant|MODERATE|MUC3A|MUC3A|transcript|NM_005960.1|protein_coding|2/13|c.3016T>A|p.Ser1006Thr|3221/5837|3016/4461|1006/1486||	GT:AD:DP:GQ:PL	0/0/1/1:112,108:220:99:4250,127,0,155,4514
7	100552436	rs78685360	C	T	4184.2	PASS	AC=2;AF=0.500;AN=4;BaseQRankSum=0.905;ClippingRankSum=0.000;DB;DP=221;FS=2.341;MLEAC=2;MLEAF=0.500;MQ=60.00;MQ0=0;MQRankSum=0.000;QD=18.93;ReadPosRankSum=-1.004;SOR=0.894;VQSLOD=6.47;culprit=DP;ANN=T|missense_variant|MODERATE|MUC3A|MUC3A|transcript|NM_005960.1|protein_coding|2/13|c.3017C>T|p.Ser1006Leu|3222/5837|3017/4461|1006/1486||	GT:AD:DP:GQ:PL	0/0/1/1:113,108:221:99:4211,126,0,154,4475
7	100552535	rs73163758	G	A	4667.2	PASS	AC=2;AF=0.500;AN=4;BaseQRankSum=-1.038;ClippingRankSum=0.000;DB;DP=245;FS=0.469;MLEAC=2;MLEAF=0.500;MQ=60.00;MQ0=0;MQRankSum=0.000;QD=19.05;ReadPosRankSum=0.228;SOR=0.647;VQSLOD=3.85;culprit=DP;ANN=A|missense_variant|MODERATE|MUC3A|MUC3A|transcript|NM_005960.1|protein_coding|2/13|c.3116G>A|p.Ser1039Asn|3321/5837|3116/4461|1039/1486||	GT:AD:DP:GQ:PL	0/0/1/1:123,122:245:99:4694,153,0,154,6717
7	100552549	rs73163760	C	A	4539.2	PASS	AC=2;AF=0.500;AN=4;BaseQRankSum=-3.109;ClippingRankSum=0.000;DB;DP=230;FS=1.017;MLEAC=2;MLEAF=0.500;MQ=60.00;MQ0=0;MQRankSum=0.000;QD=19.74;ReadPosRankSum=0.467;SOR=0.618;VQSLOD=5.79;culprit=DP;ANN=A|missense_variant|MODERATE|MUC3A|MUC3A|transcript|NM_005960.1|protein_coding|2/13|c.3130C>A|p.Leu1044Ile|3335/5837|3130/4461|1044/1486||	GT:AD:DP:GQ:PL	0/0/1/1:113,117:230:99:4566,158,0,131,6236
7	100552555	.	C	A	454.2	PASS	AC=1;AF=0.250;AN=4;BaseQRankSum=0.255;ClippingRankSum=0.000;DP=231;FS=2.625;MLEAC=1;MLEAF=0.250;MQ=60.00;MQ0=0;MQRankSum=0.000;QD=1.97;ReadPosRankSum=0.094;SOR=0.473;VQSLOD=5.12;culprit=DP;ANN=A|missense_variant|MODERATE|MUC3A|MUC3A|transcript|NM_005960.1|protein_coding|2/13|c.3136C>A|p.Leu1046Ile|3341/5837|3136/4461|1046/1486||	GT:AD:DP:GQ:PL	0/0/0/1:203,28:231:99:481,0,276,841,13826
7	100552657	rs75471530	A	G	4354.2	PASS	AC=2;AF=0.500;AN=4;BaseQRankSum=-1.573;ClippingRankSum=0.000;DB;DP=224;FS=7.449;MLEAC=2;MLEAF=0.500;MQ=60.00;MQ0=0;MQRankSum=0.000;QD=19.44;ReadPosRankSum=-1.945;SOR=1.100;VQSLOD=5.97;culprit=DP;ANN=G|missense_variant|MODERATE|MUC3A|MUC3A|transcript|NM_005960.1|protein_coding|2/13|c.3238A>G|p.Thr1080Ala|3443/5837|3238/4461|1080/1486||	GT:AD:DP:GQ:PL	0/0/1/1:107,117:224:99:4381,153,0,131,4384
7	100552675	rs73163764	C	T	3677.2	PASS	AC=2;AF=0.500;AN=4;BaseQRankSum=-3.545;ClippingRankSum=0.000;DB;DP=222;FS=10.983;MLEAC=2;MLEAF=0.500;MQ=60.00;MQ0=0;MQRankSum=0.000;QD=16.64;ReadPosRankSum=-2.017;SOR=1.147;VQSLOD=7.02;culprit=DP;ANN=T|missense_variant|MODERATE|MUC3A|MUC3A|transcript|NM_005960.1|protein_coding|2/13|c.3256C>T|p.Pro1086Ser|3461/5837|3256/4461|1086/1486||	GT:AD:DP:GQ:PL	0/0/1/1:110,111:221:99:3704,139,0,134,2960
7	100552711	rs75799835	T	A	4179.2	PASS	AC=2;AF=0.500;AN=4;BaseQRankSum=-1.642;ClippingRankSum=0.000;DB;DP=226;FS=13.358;MLEAC=2;MLEAF=0.500;MQ=60.00;MQ0=0;MQRankSum=0.000;QD=18.49;ReadPosRankSum=-1.294;SOR=1.195;VQSLOD=6.82;culprit=DP;ANN=A|missense_variant|MODERATE|MUC3A|MUC3A|transcript|NM_005960.1|protein_coding|2/13|c.3292T>A|p.Ser1098Thr|3497/5837|3292/4461|1098/1486||	GT:AD:DP:GQ:PL	0/0/1/1:115,111:226:99:4206,130,0,160,4757
7	100552727	rs74529310	G	C	4144.2	PASS	AC=2;AF=0.500;AN=4;BaseQRankSum=3.818;ClippingRankSum=0.000;DB;DP=237;FS=5.260;MLEAC=2;MLEAF=0.500;MQ=60.00;MQ0=0;MQRankSum=0.000;QD=17.49;ReadPosRankSum=0.760;SOR=1.008;VQSLOD=5.25;culprit=DP;ANN=C|missense_variant|MODERATE|MUC3A|MUC3A|transcript|NM_005960.1|protein_coding|2/13|c.3308G>C|p.Arg1103Pro|3513/5837|3308/4461|1103/1486||	GT:AD:DP:GQ:PL	0/0/1/1:126,111:237:99:4171,116,0,179,4023
7	100552738	rs79874934	C	T	4371.2	PASS	AC=2;AF=0.500;AN=4;BaseQRankSum=2.992;ClippingRankSum=0.000;DB;DP=235;FS=3.647;MLEAC=2;MLEAF=0.500;MQ=60.00;MQ0=0;MQRankSum=0.000;QD=18.60;ReadPosRankSum=0.885;SOR=0.955;VQSLOD=5.39;culprit=DP;ANN=T|stop_gained|HIGH|MUC3A|MUC3A|transcript|NM_005960.1|protein_coding|2/13|c.3319C>T|p.Gln1107*|3524/5837|3319/4461|1107/1486||;LOF=(MUC3A|MUC3A|1|1.00);NMD=(MUC3A|MUC3A|1|1.00)	GT:AD:DP:GQ:PL	0/0/1/1:123,112:235:99:4398,125,0,172,4923
7	100552739	rs75517157	A	G	4329.2	PASS	AC=2;AF=0.500;AN=4;BaseQRankSum=-4.219;ClippingRankSum=0.000;DB;DP=236;FS=4.421;MLEAC=2;MLEAF=0.500;MQ=60.00;MQ0=0;MQRankSum=0.000;QD=18.34;ReadPosRankSum=1.048;SOR=0.975;VQSLOD=5.38;culprit=DP;ANN=G|missense_variant|MODERATE|MUC3A|MUC3A|transcript|NM_005960.1|protein_coding|2/13|c.3320A>G|p.Gln1107Arg|3525/5837|3320/4461|1107/1486||	GT:AD:DP:GQ:PL	0/0/1/1:124,112:236:99:4356,122,0,174,4926
7	100607871	rs6960868	C	T	2153.2	PASS	AC=2;AF=0.500;AN=4;BaseQRankSum=2.034;ClippingRankSum=0.000;DB;DP=183;FS=0.000;MLEAC=2;MLEAF=0.500;MQ=60.00;MQ0=0;MQRankSum=0.000;QD=11.77;ReadPosRankSum=-0.215;SOR=0.678;VQSLOD=13.31;culprit=DP;ANN=T|missense_variant|MODERATE|MUC3A|MUC3A|transcript|NM_005960.1|protein_coding|6/13|c.3848C>T|p.Ala1283Val|4053/5837|3848/4461|1283/1486||	GT:AD:DP:GQ:PL	0/0/1/1:97,86:183:86:2180,86,0,136,2343
7	100608370	rs73714276	A	C	3934.2	PASS	AC=2;AF=0.500;AN=4;BaseQRankSum=4.795;ClippingRankSum=0.000;DB;DP=220;FS=8.637;MLEAC=2;MLEAF=0.500;MQ=60.00;MQ0=0;MQRankSum=0.000;QD=17.88;ReadPosRankSum=0.720;SOR=1.125;VQSLOD=7.78;culprit=DP;ANN=C|splice_donor_variant&intron_variant|HIGH|MUC3A|MUC3A|transcript|NM_005960.1|protein_coding|7/12|c.3934+1A>C||||||,C|upstream_gene_variant|MODIFIER|MUC12|MUC12|transcript|NM_001164462.1|protein_coding|…	GT:AD:DP:GQ:PL	0/0/1/1:116,104:220:99:3961,113,0,165,4376
7	107204395	.	G	T	279.6	PASS	AC=1;AF=0.200;AN=5;BaseQRankSum=-0.809;ClippingRankSum=0.278;DP=109;FS=0.000;MLEAC=1;MLEAF=0.200;MQ=60.00;MQ0=0;MQRankSum=-1.520;QD=2.57;ReadPosRankSum=0.407;SOR=0.642;VQSLOD=13.27;culprit=QD;ANN=T|missense_variant|MODERATE|COG5|COG5|transcript|NM_006348.3|protein_coding|1/22|c.40C>A|p.Pro14Thr|565/4880|40/2583|14/860||,T|upstream_gene_variant|MODIFIER|DUS4L|DUS4L|transcript|NM_001270419.1|protei…	GT:AD:DP:GQ:PL	0/0/0/0/1:93,16:109:67:306,0,67,202,458,2778
7	107696359	.	C	T	1899.6	PASS	AC=3;AF=0.600;AN=5;BaseQRankSum=-0.447;ClippingRankSum=-0.242;DP=127;FS=4.462;MLEAC=3;MLEAF=0.600;MQ=60.00;MQ0=0;MQRankSum=0.726;QD=14.96;ReadPosRankSum=0.829;SOR=0.387;VQSLOD=13.67;culprit=DP;ANN=T|missense_variant|MODERATE|LAMB4|LAMB4|transcript|NM_001318046.1|protein_coding|25/34|c.3473G>A|p.Cys1158Tyr|3554/5855|3473/5286|1158/1761||	GT:AD:DP:GQ:PL	0/0/1/1/1:53,74:127:35:1926,188,35,0,68,1348
7	108524144	.	C	T	158.6	PASS	AC=1;AF=0.200;AN=5;BaseQRankSum=1.340;ClippingRankSum=0.458;DP=108;FS=0.000;MLEAC=1;MLEAF=0.200;MQ=60.00;MQ0=0;MQRankSum=0.050;QD=1.52;ReadPosRankSum=-0.303;SOR=0.576;VQSLOD=13.53;culprit=QD;ANN=T|missense_variant|MODERATE|C7orf66|C7orf66|transcript|NM_001024607.2|protein_coding|2/2|c.268G>A|p.Val90Met|323/435|268/348|90/115||	GT:AD:DP:GQ:PL	0/0/0/0/1:94,10:104:86:185,0,86,231,494,2777
7	131870165	.	C	A	230.6	PASS	AC=1;AF=0.200;AN=5;BaseQRankSum=-1.772;ClippingRankSum=-0.893;DP=107;FS=0.000;MLEAC=1;MLEAF=0.200;MQ=60.00;MQ0=0;MQRankSum=1.332;QD=2.16;ReadPosRankSum=1.270;SOR=0.726;VQSLOD=13.76;culprit=QD;ANN=A|missense_variant|MODERATE|PLXNA4|PLXNA4|transcript|NM_020911.1|protein_coding|16/32|c.3051G>T|p.Met1017Ile|3280/13061|3051/5685|1017/1894||	GT:AD:DP:GQ:PL	0/0/0/0/1:92,15:107:71:257,0,71,206,463,2817
7	141895974	.	G	A	475.6	PASS	AC=1;AF=0.200;AN=5;BaseQRankSum=-1.613;ClippingRankSum=-0.354;DP=119;FS=1.884;MLEAC=1;MLEAF=0.200;MQ=60.00;MQ0=0;MQRankSum=0.248;QD=4.00;ReadPosRankSum=0.871;SOR=1.024;VQSLOD=13.74;culprit=QD;ANN=A|missense_variant|MODERATE|MGAM2|MGAM2|transcript|NM_001293626.1|protein_coding|38/48|c.4367G>A|p.Gly1456Glu|4426/7872|4367/7548|1456/2515||	GT:AD:DP:GQ:PL	0/0/0/0/1:95,24:119:47:502,0,47,172,425,2876
7	154461087	.	A	G	478.6	PASS	AC=1;AF=0.200;AN=5;BaseQRankSum=-0.239;ClippingRankSum=-0.502;DP=127;FS=0.842;MLEAC=1;MLEAF=0.200;MQ=60.00;MQ0=0;MQRankSum=-1.621;QD=3.80;ReadPosRankSum=0.147;SOR=0.685;VQSLOD=12.66;culprit=DP;ANN=G|missense_variant|MODERATE|DPP6|DPP6|transcript|NM_130797.3|protein_coding|7/26|c.698A>G|p.Asp233Gly|1101/4811|698/2598|233/865||	GT:AD:DP:GQ:PL	0/0/0/0/1:101,25:126:50:505,0,50,182,446,2838
8	3253756	.	G	T	653.64	PASS	AC=1;AF=0.333;AN=3;BaseQRankSum=1.538;ClippingRankSum=0.000;DP=66;FS=4.994;MLEAC=1;MLEAF=0.333;MQ=60.00;MQ0=0;MQRankSum=0.000;QD=9.90;ReadPosRankSum=-0.595;SOR=0.963;VQSLOD=21.78;culprit=MQ;ANN=T|missense_variant|MODERATE|CSMD1|CSMD1|transcript|NM_033225.5|protein_coding|17/70|c.2553C>A|p.Asp851Glu|2943/14317|2553/10695|851/3564||	GT:AD:DP:GQ:PL	0/0/1:39,27:66:40:681,0,40,1348
8	10387044	.	G	T	721.65	PASS	AC=1;AF=0.333;AN=3;BaseQRankSum=2.249;ClippingRankSum=0.000;DP=68;FS=6.612;MLEAC=1;MLEAF=0.333;MQ=60.00;MQ0=0;MQRankSum=0.000;QD=10.77;ReadPosRankSum=0.136;SOR=1.156;VQSLOD=21.91;culprit=MQ;ANN=T|missense_variant|MODERATE|PRSS55|PRSS55|transcript|NM_198464.3|protein_coding|2/5|c.182G>T|p.Gly61Val|222/1129|182/1059|61/352||	GT:AD:DP:GQ:PL	0/0/1:38,29:67:27:749,0,27,988
8	13424847	.	A	C	1048.64	PASS	AC=2;AF=0.667;AN=3;BaseQRankSum=1.829;ClippingRankSum=0.000;DP=50;FS=1.186;MLEAC=2;MLEAF=0.667;MQ=60.00;MQ0=0;MQRankSum=0.000;QD=20.97;ReadPosRankSum=1.695;SOR=0.927;VQSLOD=21.08;culprit=MQ;ANN=C|missense_variant|MODERATE|C8orf48|C8orf48|transcript|NM_001007090.2|protein_coding|1/1|c.347A>C|p.Asp116Ala|496/1446|347/960|116/319||	GT:AD:DP:GQ:PL	0/1/1:14,36:50:65:1076,65,0,335
8	27690580	.	C	G	330.64	PASS	AC=1;AF=0.333;AN=3;BaseQRankSum=-1.298;ClippingRankSum=0.000;DP=63;FS=6.611;MLEAC=1;MLEAF=0.333;MQ=60.00;MQ0=0;MQRankSum=0.000;QD=5.51;ReadPosRankSum=0.519;SOR=1.802;VQSLOD=21.77;culprit=QD;ANN=G|missense_variant|MODERATE|PBK|PBK|transcript|NM_001278945.1|protein_coding|2/8|c.51G>C|p.Lys17Asn|457/2092|51/1002|17/333||	GT:AD:DP:GQ:PL	0/0/1:44,16:60:83:358,0,83,1261
8	27973533	rs7012681	G	C	720.64	PASS	AC=1;AF=0.333;AN=3;BaseQRankSum=0.694;ClippingRankSum=0.000;DB;DP=81;FS=14.176;MLEAC=1;MLEAF=0.333;MQ=60.00;MQ0=0;MQRankSum=0.000;POSITIVE_TRAIN_SITE;QD=8.90;ReadPosRankSum=-1.604;SOR=1.329;VQSLOD=22.16;culprit=FS;ANN=C|sequence_feature|MODERATE|ELP3|ELP3|cross-link:Glycyl_lysine_isopeptide_(Lys-Gly)_(interchain_with_G-Cter_in_ubiquitin)|NM_018091.5|protein_coding||c.617+2843G>C||||||,C|intron_va…	GT:AD:DP:GQ:PL	0/0/1:52,29:81:69:748,0,69,1510
8	27978841	rs6998039	A	T	536.61	PASS	AC=3;AF=1.00;AN=3;DB;DP=30;FS=0.000;MLEAC=3;MLEAF=1.00;MQ=60.00;MQ0=0;QD=29.81;SOR=1.473;VQSLOD=19.00;culprit=QD;ANN=T|sequence_feature|MODERATE|ELP3|ELP3|cross-link:Glycyl_lysine_isopeptide_(Lys-Gly)_(interchain_with_G-Cter_in_ubiquitin)|NM_018091.5|protein_coding||c.617+8151A>T||||||,T|intron_variant|MODIFIER|ELP3|ELP3|transcript|NM_018091.5|protein_coding|7/14|c.617+8151A>T||||||	GT:AD:DP:GQ:PL	1/1/1:0,18:18:31:573,85,31,0
8	27980760	rs9987220	T	C	707.64	PASS	AC=1;AF=0.333;AN=3;BaseQRankSum=0.201;ClippingRankSum=0.000;DB;DP=90;FS=3.031;MLEAC=1;MLEAF=0.333;MQ=60.00;MQ0=0;MQRankSum=0.000;POSITIVE_TRAIN_SITE;QD=7.95;ReadPosRankSum=-0.832;SOR=0.767;VQSLOD=22.63;culprit=MQ;ANN=C|sequence_feature|MODERATE|ELP3|ELP3|cross-link:Glycyl_lysine_isopeptide_(Lys-Gly)_(interchain_with_G-Cter_in_ubiquitin)|NM_018091.5|protein_coding||c.618-6259T>C||||||,C|intron_var…	GT:AD:DP:GQ:PL	0/0/1:60,29:89:92:735,0,92,1699
8	30699840	.	C	A	621.64	PASS	AC=1;AF=0.333;AN=3;BaseQRankSum=-0.119;ClippingRankSum=0.000;DP=92;FS=1.868;MLEAC=1;MLEAF=0.333;MQ=60.00;MQ0=0;MQRankSum=0.000;QD=6.76;ReadPosRankSum=-0.578;SOR=0.899;VQSLOD=21.41;culprit=QD;ANN=A|missense_variant|MODERATE|TEX15|TEX15|transcript|NM_031271.3|protein_coding|1/4|c.6694G>T|p.Val2232Phe|6694/10112|6694/8370|2232/2789||	GT:AD:DP:GQ:PL	0/0/1:65,27:92:99:649,0,114,1906
8	41790109	.	G	A	862.64	PASS	AC=1;AF=0.333;AN=3;BaseQRankSum=1.591;ClippingRankSum=0.000;DP=86;FS=5.523;MLEAC=1;MLEAF=0.333;MQ=60.00;MQ0=0;MQRankSum=0.000;QD=10.03;ReadPosRankSum=-0.598;SOR=0.330;VQSLOD=21.69;culprit=MQ;ANN=A|missense_variant|MODERATE|KAT6A|KAT6A|transcript|NM_006766.4|protein_coding|17/17|c.5629C>T|p.Arg1877Cys|6080/9192|5629/6015|1877/2004||	GT:AD:DP:GQ:PL	0/0/1:50,36:86:41:890,0,41,1264
8	49832477	.	T	A	380.64	PASS	AC=1;AF=0.333;AN=3;BaseQRankSum=-3.096;ClippingRankSum=0.000;DP=69;FS=0.000;MLEAC=1;MLEAF=0.333;MQ=60.00;MQ0=0;MQRankSum=0.000;QD=5.52;ReadPosRankSum=1.250;SOR=0.586;VQSLOD=21.61;culprit=QD;ANN=A|missense_variant|MODERATE|SNAI2|SNAI2|transcript|NM_003068.4|protein_coding|2/3|c.603A>T|p.Gln201His|778/2109|603/807|201/268||	GT:AD:DP:GQ:PL	0/0/1:51,18:69:99:408,0,100,1560
8	57228621	.	T	G	948.64	PASS	AC=2;AF=0.667;AN=3;BaseQRankSum=-1.299;ClippingRankSum=0.000;DP=58;FS=1.014;MLEAC=2;MLEAF=0.667;MQ=60.00;MQ0=0;MQRankSum=0.000;QD=16.36;ReadPosRankSum=-0.555;SOR=0.856;VQSLOD=21.62;culprit=MQ;ANN=G|missense_variant|MODERATE|SDR16C5|SDR16C5|transcript|NM_001318049.1|protein_coding|2/8|c.286A>C|p.Thr96Pro|1018/3641|286/957|96/318||	GT:AD:DP:GQ:PL	0/1/1:22,36:58:41:976,41,0,575
8	77618486	.	C	A	503.71	PASS	AC=1;AF=0.333;AN=3;BaseQRankSum=-0.064;ClippingRankSum=0.000;DP=48;FS=0.000;MLEAC=1;MLEAF=0.333;MQ=60.00;MQ0=0;MQRankSum=0.000;QD=10.49;ReadPosRankSum=-0.337;SOR=0.644;VQSLOD=21.45;culprit=MQ;ANN=A|missense_variant|MODERATE|ZFHX4|ZFHX4|transcript|NM_024721.4|protein_coding|2/11|c.2163C>A|p.Asp721Glu|2550/13958|2163/10851|721/3616||	GT:AD:DP:GQ:PL	0/0/1:27,21:48:18:531,0,18,738
8	104427330	.	A	C	1202.64	PASS	AC=2;AF=0.667;AN=3;BaseQRankSum=-3.831;ClippingRankSum=0.000;DP=64;FS=1.041;MLEAC=2;MLEAF=0.667;MQ=60.00;MQ0=0;MQRankSum=0.000;QD=18.79;ReadPosRankSum=-0.296;SOR=0.874;VQSLOD=21.68;culprit=MQ;ANN=C|missense_variant|MODERATE|DCAF13|DCAF13|transcript|NM_015420.6|protein_coding|1/11|c.112A>C|p.Ser38Arg|389/2641|112/1794|38/597||,C|5_prime_UTR_variant|MODIFIER|SLC25A32|SLC25A32|transcript|NM_030780.4…	GT:AD:DP:GQ:PL	0/1/1:18,46:64:85:1230,85,0,414
8	104778530	.	G	T	732.64	PASS	AC=1;AF=0.333;AN=3;BaseQRankSum=-0.634;ClippingRankSum=0.000;DP=75;FS=0.000;MLEAC=1;MLEAF=0.333;MQ=60.00;MQ0=0;MQRankSum=0.000;QD=9.77;ReadPosRankSum=-1.027;SOR=0.690;VQSLOD=21.71;culprit=MQ;ANN=T|stop_gained|HIGH|RIMS2|RIMS2|transcript|NM_001100117.2|protein_coding|3/24|c.463G>T|p.Gly155*|602/6797|463/4050|155/1349||;LOF=(RIMS2|RIMS2|1|1.00);NMD=(RIMS2|RIMS2|1|1.00)	GT:AD:DP:GQ:PL	0/0/1:45,30:75:43:760,0,43,1219
8	113562916	.	A	C	443.64	PASS	AC=1;AF=0.333;AN=3;BaseQRankSum=-0.467;ClippingRankSum=0.000;DP=59;FS=2.347;MLEAC=1;MLEAF=0.333;MQ=60.00;MQ0=0;MQRankSum=0.000;QD=7.52;ReadPosRankSum=0.077;SOR=1.096;VQSLOD=21.62;culprit=MQ;ANN=C|missense_variant|MODERATE|CSMD3|CSMD3|transcript|NM_198123.1|protein_coding|27/71|c.4548T>G|p.Phe1516Leu|4707/13124|4548/11124|1516/3707||	GT:AD:DP:GQ:PL	0/0/1:39,20:59:57:471,0,57,1100
8	125072530	.	A	T	558.64	PASS	AC=1;AF=0.333;AN=3;BaseQRankSum=-0.762;ClippingRankSum=0.000;DP=81;FS=0.000;MLEAC=1;MLEAF=0.333;MQ=60.00;MQ0=0;MQRankSum=0.000;QD=6.90;ReadPosRankSum=1.652;SOR=0.582;VQSLOD=21.46;culprit=MQ;ANN=T|missense_variant&splice_region_variant|MODERATE|FER1L6|FER1L6|transcript|NM_001039112.2|protein_coding|23/41|c.2984A>T|p.Glu995Val|3190/6051|2984/5574|995/1857||,T|non_coding_transcript_exon_variant|MODI…	GT:AD:DP:GQ:PL	0/0/1:56,25:81:92:586,0,92,1584
8	145001882	.	T	C	686.64	PASS	AC=1;AF=0.333;AN=3;BaseQRankSum=1.490;ClippingRankSum=0.000;DP=84;FS=0.877;MLEAC=1;MLEAF=0.333;MQ=60.00;MQ0=0;MQRankSum=0.000;QD=8.17;ReadPosRankSum=0.835;SOR=0.854;VQSLOD=21.58;culprit=MQ;ANN=C|missense_variant|MODERATE|PLEC|PLEC|transcript|NM_201380.3|protein_coding|27/32|c.3863A>G|p.Asp1288Gly|4033/15255|3863/14055|1288/4684||	GT:AD:DP:GQ:PL	0/0/1:54,30:84:68:714,0,68,1330
9	77416911	.	C	A	1445.77	PASS	AC=2;AF=1.00;AN=2;DP=47;ExcessHet=3.0103;FS=0.000;MLEAC=2;MLEAF=1.00;MQ=60.00;MQ0=0;QD=30.76;SOR=1.022;VQSLOD=19.86;culprit=MQ;ANN=A|missense_variant|MODERATE|TRPM6|TRPM6|transcript|NM_017662.4|protein_coding|16/39|c.1912G>T|p.Ala638Ser|2150/8425|1912/6069|638/2022||	GT:AD:DP:GQ:PL	1/1:0,47:47:99:1474,140,0
9	128000989	.	G	A	980.64	PASS	AC=1;AF=0.333;AN=3;BaseQRankSum=2.226;ClippingRankSum=0.000;DP=91;FS=5.418;MLEAC=1;MLEAF=0.333;MQ=60.00;MQ0=0;MQRankSum=0.000;QD=10.78;ReadPosRankSum=0.907;SOR=1.116;VQSLOD=21.51;culprit=MQ;ANN=A|stop_gained|HIGH|HSPA5|HSPA5|transcript|NM_005347.4|protein_coding|6/8|c.1114C>T|p.Gln372*|1375/3970|1114/1965|372/654||,A|downstream_gene_variant|MODIFIER|RABEPK|RABEPK|transcript|NM_001174152.1|protein…	GT:AD:DP:GQ:PL	0/0/1:53,38:91:43:1008,0,43,1450
9	131708816	.	G	A	2480.64	PASS	AC=3;AF=1.00;AN=3;DP=80;FS=0.000;MLEAC=3;MLEAF=1.00;MQ=60.00;MQ0=0;QD=31.01;SOR=0.796;VQSLOD=17.65;culprit=MQ;ANN=A|missense_variant|MODERATE|DOLK|DOLK|transcript|NM_014908.3|protein_coding|1/1|c.767C>T|p.Ser256Phe|1197/2204|767/1617|256/538||,A|upstream_gene_variant|MODIFIER|NUP188|NUP188|transcript|NM_015354.2|protein_coding||c.-1183G>A|||||1156|,A|downstream_gene_variant|MODIFIER|PHYHD1|PHYHD1…	GT:AD:DP:GQ:PL	1/1/1:0,80:80:99:2508,378,140,0
9	134497322	.	G	C	552.64	PASS	AC=1;AF=0.333;AN=3;BaseQRankSum=5.110;ClippingRankSum=0.000;DP=76;FS=3.418;MLEAC=1;MLEAF=0.333;MQ=60.00;MQ0=0;MQRankSum=0.000;QD=7.27;ReadPosRankSum=-0.007;SOR=1.162;VQSLOD=21.72;culprit=MQ;ANN=C|missense_variant|MODERATE|RAPGEF1|RAPGEF1|transcript|NM_198679.1|protein_coding|11/24|c.1769C>G|p.Thr590Arg|1928/6174|1769/3288|590/1095||	GT:AD:DP:GQ:PL	0/0/1:53,23:76:86:580,0,86,1264
9	139222174	rs28495820	T	C	478.65	PASS	AC=3;AF=1.00;AN=3;DB;DP=17;FS=0.000;MLEAC=3;MLEAF=1.00;MQ=60.00;MQ0=0;QD=28.16;SOR=2.179;VQSLOD=16.94;culprit=QD;ANN=C|missense_variant|MODERATE|GPSM1|GPSM1|transcript|NM_001145638.2|protein_coding|1/14|c.23T>C|p.Val8Ala|243/3633|23/2028|8/675||,C|upstream_gene_variant|MODIFIER|DKFZP434A062|DKFZP434A062|transcript|NR_026964.3|pseudogene||n.-395A>G|||||395|	GT:AD:DP:GQ:PL	1/1/1:0,17:17:29:506,79,29,0
9	139413165	.	C	A	677.64	PASS	AC=1;AF=0.333;AN=3;BaseQRankSum=-3.281;ClippingRankSum=0.000;DP=88;FS=4.395;MLEAC=1;MLEAF=0.333;MQ=60.00;MQ0=0;MQRankSum=0.000;QD=7.70;ReadPosRankSum=-0.741;SOR=1.235;VQSLOD=21.55;culprit=MQ;ANN=A|missense_variant|MODERATE|NOTCH1|NOTCH1|transcript|NM_017617.4|protein_coding|6/34|c.977G>T|p.Gly326Val|977/9306|977/7668|326/2555||,A|downstream_gene_variant|MODIFIER|MIR4673|MIR4673|transcript|NR_0398…	GT:AD:DP:GQ:PL	0/0/1:58,30:88:84:705,0,84,1671
10	30315418	.	A	G	300.64	PASS	AC=1;AF=0.333;AN=3;BaseQRankSum=0.500;ClippingRankSum=0.000;DP=59;FS=0.000;MLEAC=1;MLEAF=0.333;MQ=60.00;MQ0=0;MQRankSum=0.000;QD=5.10;ReadPosRankSum=0.454;SOR=0.646;VQSLOD=21.63;culprit=QD;ANN=G|missense_variant|MODERATE|KIAA1462|KIAA1462|transcript|NM_020848.2|protein_coding|3/4|c.3659T>C|p.Val1220Ala|3796/9300|3659/4080|1220/1359||	GT:AD:DP:GQ:PL	0/0/1:45,14:59:93:328,0,93,1353
10	75865066	.	A	G	2033.2	PASS	AC=2;AF=0.500;AN=4;BaseQRankSum=1.721;ClippingRankSum=0.616;DP=102;FS=1.584;MLEAC=2;MLEAF=0.500;MQ=60.00;MQ0=0;MQRankSum=1.668;QD=19.93;ReadPosRankSum=0.857;SOR=0.540;VQSLOD=13.48;culprit=MQ;ANN=G|missense_variant|MODERATE|VCL|VCL|transcript|NM_014000.2|protein_coding|16/22|c.2389A>G|p.Met797Val|2483/5486|2389/3405|797/1134||	GT:AD:DP:GQ:PL	0/0/1/1:49,53:102:54:2060,73,0,54,2786
10	76910700	.	C	G	94.2	PASS	AC=1;AF=0.250;AN=4;BaseQRankSum=-0.065;ClippingRankSum=-1.370;DP=89;FS=0.000;MLEAC=1;MLEAF=0.250;MQ=60.00;MQ0=0;MQRankSum=0.222;QD=1.06;ReadPosRankSum=1.226;SOR=0.538;VQSLOD=14.11;culprit=QD;ANN=G|missense_variant|MODERATE|SAMD8|SAMD8|transcript|NM_001174156.1|protein_coding|2/6|c.414C>G|p.Asn138Lys|517/6782|414/1248|138/415||	GT:AD:DP:GQ:PL	0/0/0/1:81,8:89:99:121,0,118,347,2533
10	102051084	.	T	G	242.77	PASS	AC=1;AF=0.500;AN=2;BaseQRankSum=0.320;ClippingRankSum=0.000;DP=45;ExcessHet=3.0103;FS=2.771;MLEAC=1;MLEAF=0.500;MQ=60.00;MQ0=0;MQRankSum=0.000;QD=5.39;ReadPosRankSum=1.644;SOR=1.179;VQSLOD=20.98;culprit=QD;ANN=G|missense_variant|MODERATE|PKD2L1|PKD2L1|transcript|NM_016112.2|protein_coding|12/16|c.1981A>C|p.Met661Leu|2364/3051|1981/2418|661/805||,G|upstream_gene_variant|MODIFIER|BLOC1S2|BLOC1S2|tr…	GT:AD:DP:GQ:PL	0/1:32,13:45:99:271,0,877
10	115608928	.	C	T	423.77	PASS	AC=1;AF=0.500;AN=2;BaseQRankSum=0.511;ClippingRankSum=0.000;DP=46;ExcessHet=3.0103;FS=4.224;MLEAC=1;MLEAF=0.500;MQ=60.00;MQ0=0;MQRankSum=0.000;QD=9.21;ReadPosRankSum=0.593;SOR=1.104;VQSLOD=21.32;culprit=MQ;ANN=T|missense_variant|MODERATE|DCLRE1A|DCLRE1A|transcript|NM_001271816.1|protein_coding|3/10|c.1936G>A|p.Glu646Lys|2652/4267|1936/3123|646/1040||	GT:AD:DP:GQ:PL	0/1:28,18:46:99:452,0,804
10	115609978	.	A	T	1612.77	PASS	AC=2;AF=1.00;AN=2;DP=50;ExcessHet=3.0103;FS=0.000;MLEAC=2;MLEAF=1.00;MQ=60.00;MQ0=0;QD=32.26;SOR=1.519;VQSLOD=19.59;culprit=MQ;ANN=T|missense_variant|MODERATE|DCLRE1A|DCLRE1A|transcript|NM_001271816.1|protein_coding|3/10|c.886T>A|p.Cys296Ser|1602/4267|886/3123|296/1040||,T|upstream_gene_variant|MODIFIER|NHLRC2|NHLRC2|transcript|NM_198514.3|protein_coding||c.-4654A>T|||||4413|	GT:AD:DP:GQ:PL	1/1:0,50:50:99:1641,150,0
10	120810736	.	T	A	820.77	PASS	AC=1;AF=0.500;AN=2;BaseQRankSum=1.635;ClippingRankSum=0.000;DP=67;ExcessHet=3.0103;FS=6.526;MLEAC=1;MLEAF=0.500;MQ=60.00;MQ0=0;MQRankSum=0.000;QD=12.25;ReadPosRankSum=0.791;SOR=0.257;VQSLOD=21.85;culprit=MQ;ANN=A|missense_variant|MODERATE|EIF3A|EIF3A|transcript|NM_003750.2|protein_coding|15/22|c.2294A>T|p.Lys765Ile|2440/5305|2294/4149|765/1382||	GT:AD:DP:GQ:PL	0/1:35,32:67:99:849,0,945
11	397348	.	A	G	1342.64	PASS	AC=2;AF=0.667;AN=3;BaseQRankSum=-1.674;ClippingRankSum=0.000;DP=79;FS=0.000;MLEAC=2;MLEAF=0.667;MQ=60.00;MQ0=0;MQRankSum=0.000;QD=17.21;ReadPosRankSum=-0.527;SOR=0.671;VQSLOD=21.71;culprit=MQ;ANN=G|missense_variant|MODERATE|PKP3|PKP3|transcript|NM_001303029.1|protein_coding|4/14|c.892A>G|p.Ser298Gly|921/2807|892/2439|298/812||	GT:AD:DP:GQ:PL	0/1/1:24,54:78:90:1370,90,0,506
11	1213272	rs78252457	A	C	9549.64	PASS	AC=2;AF=0.667;AN=3;BaseQRankSum=-0.214;ClippingRankSum=0.000;DB;DP=306;FS=8.141;MLEAC=2;MLEAF=0.667;MQ=60.00;MQ0=0;MQRankSum=0.000;NEGATIVE_TRAIN_SITE;QD=31.21;ReadPosRankSum=-0.044;SOR=0.373;VQSLOD=0.891;culprit=DP;ANN=C|missense_variant|MODERATE|MUC5AC|MUC5AC|transcript|NM_001304359.1|protein_coding|16/35|c.2381A>C|p.Gln794Pro|2428/5924|2381/5439|794/1812||WARNING_TRANSCRIPT_MULTIPLE_STOP_CODONS	GT:AD:DP:GQ:PL	0/1/1:82,224:306:99:9577,442,0,2972
11	1213281	rs75618268	C	T	9486.64	PASS	AC=2;AF=0.667;AN=3;BaseQRankSum=6.688;ClippingRankSum=0.000;DB;DP=310;FS=7.929;MLEAC=2;MLEAF=0.667;MQ=60.00;MQ0=0;MQRankSum=0.000;NEGATIVE_TRAIN_SITE;QD=30.60;ReadPosRankSum=0.391;SOR=0.387;VQSLOD=0.831;culprit=DP;ANN=T|missense_variant|MODERATE|MUC5AC|MUC5AC|transcript|NM_001304359.1|protein_coding|16/35|c.2390C>T|p.Ser797Leu|2437/5924|2390/5439|797/1812||WARNING_TRANSCRIPT_MULTIPLE_STOP_CODONS	GT:AD:DP:GQ:PL	0/1/1:86,224:310:99:9514,433,0,3055
11	1213416	rs78511643	G	A	4049.64	PASS	AC=1;AF=0.333;AN=3;BaseQRankSum=6.937;ClippingRankSum=0.000;DB;DP=424;FS=6.109;MLEAC=1;MLEAF=0.333;MQ=60.00;MQ0=0;MQRankSum=0.000;QD=9.57;ReadPosRankSum=1.253;SOR=0.801;VQSLOD=0.739;culprit=DP;ANN=A|missense_variant|MODERATE|MUC5AC|MUC5AC|transcript|NM_001304359.1|protein_coding|16/35|c.2525G>A|p.Arg842Gln|2572/5924|2525/5439|842/1812||WARNING_TRANSCRIPT_MULTIPLE_STOP_CODONS	GT:AD:DP:GQ:PL	0/0/1:261,162:423:99:4077,0,297,7951
11	1213424	rs61867531	A	G	13687.6	PASS	AC=2;AF=0.667;AN=3;BaseQRankSum=3.644;ClippingRankSum=0.000;DB;DP=396;FS=7.128;MLEAC=2;MLEAF=0.667;MQ=60.00;MQ0=0;MQRankSum=0.000;QD=34.65;ReadPosRankSum=1.724;SOR=0.443;VQSLOD=0.783;culprit=DP;ANN=G|missense_variant|MODERATE|MUC5AC|MUC5AC|transcript|NM_001304359.1|protein_coding|16/35|c.2533A>G|p.Thr845Ala|2580/5924|2533/5439|845/1812||WARNING_TRANSCRIPT_MULTIPLE_STOP_CODONS	GT:AD:DP:GQ:PL	0/1/1:72,323:395:99:13715,768,0,2160
11	1213428	rs61867532	T	C	11341.6	PASS	AC=2;AF=0.667;AN=3;BaseQRankSum=-6.046;ClippingRankSum=0.000;DB;DP=388;FS=8.188;MLEAC=2;MLEAF=0.667;MQ=60.00;MQ0=0;MQRankSum=0.000;QD=29.38;ReadPosRankSum=1.463;SOR=0.447;VQSLOD=0.960;culprit=DP;ANN=C|missense_variant|MODERATE|MUC5AC|MUC5AC|transcript|NM_001304359.1|protein_coding|16/35|c.2537T>C|p.Leu846Ser|2584/5924|2537/5439|846/1812||WARNING_TRANSCRIPT_MULTIPLE_STOP_CODONS	GT:AD:DP:GQ:PL	0/1/1:91,295:386:99:11369,615,0,2995
11	1213461	rs61867534	T	G,C	4804.64	PASS	AC=1,1;AF=0.333,0.333;AN=3;BaseQRankSum=-2.877;ClippingRankSum=0.000;DB;DP=325;FS=8.452;MLEAC=1,1;MLEAF=0.333,0.333;MQ=60.00;MQ0=0;MQRankSum=0.000;NEGATIVE_TRAIN_SITE;QD=14.83;ReadPosRankSum=-0.649;SOR=0.472;VQSLOD=0.764;culprit=DP;ANN=G|missense_variant|MODERATE|MUC5AC|MUC5AC|transcript|NM_001304359.1|protein_coding|16/35|c.2570T>G|p.Val857Gly|2617/5924|2570/5439|857/1812||WARNING_TRANSCRIPT_MUL…	GT:AD:DP:GQ:PL	0/1/2:135,141,48:324:99:4832,1091,1072,5405,3573,0,4157,3833,4436,8329
11	1471022	rs201822879	G	A	375.64	PASS	AC=1;AF=0.333;AN=3;BaseQRankSum=2.947;ClippingRankSum=0.000;DB;DP=42;FS=0.000;MLEAC=1;MLEAF=0.333;MQ=60.00;MQ0=0;MQRankSum=0.000;QD=8.94;ReadPosRankSum=0.949;SOR=0.567;VQSLOD=21.15;culprit=MQ;ANN=A|missense_variant|MODERATE|BRSK2|BRSK2|transcript|NM_001256630.1|protein_coding|13/20|c.1381G>A|p.Gly461Ser|1634/4520|1381/2301|461/766||	GT:AD:DP:GQ:PL	0/0/1:27,15:42:34:403,0,34,682
11	1481930	rs4963048	A	G	454.64	PASS	AC=3;AF=1.00;AN=3;DB;DP=22;FS=0.000;MLEAC=3;MLEAF=1.00;MQ=60.00;MQ0=0;POSITIVE_TRAIN_SITE;QD=20.67;SOR=2.303;VQSLOD=13.41;culprit=DP;ANN=G|missense_variant|MODERATE|BRSK2|BRSK2|transcript|NM_001256630.1|protein_coding|20/20|c.2278A>G|p.Thr760Ala|2531/4520|2278/2301|760/766||	GT:AD:DP:GQ:PL	1/1/1:0,22:22:37:482,98,37,0
11	1901417	.	G	A	919.64	PASS	AC=1;AF=0.333;AN=3;BaseQRankSum=-0.379;ClippingRankSum=0.000;DP=104;FS=3.791;MLEAC=1;MLEAF=0.333;MQ=60.00;MQ0=0;MQRankSum=0.000;QD=8.84;ReadPosRankSum=-1.009;SOR=0.922;VQSLOD=20.97;culprit=MQ;ANN=A|missense_variant|MODERATE|LSP1|LSP1|transcript|NM_001242932.1|protein_coding|3/12|c.538G>A|p.Gly180Ser|646/2016|538/1404|180/467||,A|downstream_gene_variant|MODIFIER|MIR7847|MIR7847|transcript|NR_10700…	GT:AD:DP:GQ:PL	0/0/1:67,37:104:89:947,0,89,1902
11	16340147	.	G	A	356.64	PASS	AC=1;AF=0.333;AN=3;BaseQRankSum=-0.426;ClippingRankSum=0.000;DP=76;FS=12.203;MLEAC=1;MLEAF=0.333;MQ=60.00;MQ0=0;MQRankSum=0.000;QD=4.82;ReadPosRankSum=1.486;SOR=1.092;VQSLOD=20.99;culprit=QD;ANN=A|missense_variant|MODERATE|SOX6|SOX6|transcript|NM_001145819.1|protein_coding|3/16|c.329C>T|p.Thr110Ile|362/8919|329/2526|110/841||	GT:AD:DP:GQ:PL	0/0/1:55,19:74:99:384,0,108,1556
11	17617669	.	C	T	600.64	PASS	AC=1;AF=0.333;AN=3;BaseQRankSum=-3.353;ClippingRankSum=0.000;DP=66;FS=13.835;MLEAC=1;MLEAF=0.333;MQ=60.00;MQ0=0;MQRankSum=0.000;QD=9.10;ReadPosRankSum=-0.821;SOR=1.488;VQSLOD=20.72;culprit=FS;ANN=T|missense_variant|MODERATE|OTOG|OTOG|transcript|NM_001277269.1|protein_coding|28/55|c.3529C>T|p.Leu1177Phe|3529/8778|3529/8778|1177/2925||	GT:AD:DP:GQ:PL	0/0/1:41,25:66:49:628,0,49,1226
11	35784794	.	G	T	490.64	PASS	AC=1;AF=0.333;AN=3;BaseQRankSum=-0.317;ClippingRankSum=0.000;DP=68;FS=3.786;MLEAC=1;MLEAF=0.333;MQ=60.00;MQ0=0;MQRankSum=0.000;QD=7.22;ReadPosRankSum=-0.643;SOR=0.290;VQSLOD=21.70;culprit=MQ;ANN=T|sequence_feature|MODERATE|TRIM44|TRIM44|modified-residue:phosphoserine|NM_017583.5|protein_coding||c.1007+27801G>T||||||,T|intron_variant|MODIFIER|TRIM44|TRIM44|transcript|NM_017583.5|protein_coding|4/4…	GT:AD:DP:GQ:PL	0/0/1:47,21:68:78:518,0,78,1394
11	45937021	.	G	A	1536.64	PASS	AC=2;AF=0.667;AN=3;BaseQRankSum=1.140;ClippingRankSum=0.000;DP=88;FS=0.000;MLEAC=2;MLEAF=0.667;MQ=60.00;MQ0=0;MQRankSum=0.000;QD=17.46;ReadPosRankSum=-0.544;SOR=0.768;VQSLOD=21.54;culprit=MQ;ANN=A|missense_variant&splice_region_variant|MODERATE|PEX16|PEX16|transcript|NM_057174.2|protein_coding|5/11|c.458C>T|p.Pro153Leu|770/1773|458/1041|153/346||	GT:AD:DP:GQ:PL	0/1/1:31,57:88:78:1564,78,0,695
11	48347267	rs73465910	T	C	1265.64	PASS	AC=1;AF=0.333;AN=3;BaseQRankSum=-6.640;ClippingRankSum=0.000;DB;DP=133;FS=2.226;MLEAC=1;MLEAF=0.333;MQ=60.00;MQ0=0;MQRankSum=0.000;QD=9.59;ReadPosRankSum=-0.477;SOR=0.898;VQSLOD=19.16;culprit=DP;ANN=C|missense_variant|MODERATE|OR4C3|OR4C3|transcript|NM_001004702.1|protein_coding|1/1|c.775T>C|p.Cys259Arg|775/990|775/990|259/329||	GT:AD:DP:GQ:PL	0/0/1:72,60:132:38:1293,0,38,1962
11	48347306	rs73465911	G	T	1384.64	PASS	AC=1;AF=0.333;AN=3;BaseQRankSum=2.465;ClippingRankSum=0.000;DB;DP=126;FS=0.688;MLEAC=1;MLEAF=0.333;MQ=60.00;MQ0=0;MQRankSum=0.000;QD=11.26;ReadPosRankSum=1.827;SOR=0.824;VQSLOD=19.40;culprit=DP;ANN=T|missense_variant|MODERATE|OR4C3|OR4C3|transcript|NM_001004702.1|protein_coding|1/1|c.814G>T|p.Val272Phe|814/990|814/990|272/329||	GT:AD:DP:GQ:PL	0/0/1:69,54:123:43:1412,0,43,1844
11	48366958	rs76319939	T	G	1807.64	PASS	AC=1;AF=0.333;AN=3;BaseQRankSum=1.268;ClippingRankSum=0.000;DB;DP=159;FS=5.789;MLEAC=1;MLEAF=0.333;MQ=60.00;MQ0=0;MQRankSum=0.000;QD=11.37;ReadPosRankSum=1.655;SOR=0.983;VQSLOD=16.41;culprit=DP;ANN=G|missense_variant|MODERATE|OR4C45|OR4C45|transcript|NM_001005513.1|protein_coding|2/2|c.861A>C|p.Arg287Ser|861/919|861/919|287/305||WARNING_TRANSCRIPT_MULTIPLE_STOP_CODONS	GT:AD:DP:GQ:PL	0/0/1:88,71:159:51:1835,0,51,2340
11	48366971	rs75689989	G	C	2781.66	PASS	AC=1;AF=0.333;AN=3;BaseQRankSum=-0.907;ClippingRankSum=0.000;DB;DP=156;FS=8.175;MLEAC=1;MLEAF=0.333;MQ=60.00;MQ0=0;MQRankSum=0.000;QD=17.83;ReadPosRankSum=0.612;SOR=0.971;VQSLOD=17.16;culprit=DP;ANN=C|missense_variant|MODERATE|OR4C45|OR4C45|transcript|NM_001005513.1|protein_coding|2/2|c.848C>G|p.Pro283Arg|848/919|848/919|283/305||WARNING_TRANSCRIPT_MULTIPLE_STOP_CODONS	GT:AD:DP:GQ:PL	0/0/1:82,74:156:24:2809,0,24,3717
11	48366972	rs75621879	G	A	2781.66	PASS	AC=1;AF=0.333;AN=3;BaseQRankSum=5.634;ClippingRankSum=0.000;DB;DP=153;FS=7.081;MLEAC=1;MLEAF=0.333;MQ=60.00;MQ0=0;MQRankSum=0.000;QD=18.18;ReadPosRankSum=0.940;SOR=0.937;VQSLOD=17.29;culprit=DP;ANN=A|missense_variant|MODERATE|OR4C45|OR4C45|transcript|NM_001005513.1|protein_coding|2/2|c.847C>T|p.Pro283Ser|847/919|847/919|283/305||WARNING_TRANSCRIPT_MULTIPLE_STOP_CODONS	GT:AD:DP:GQ:PL	0/0/1:80,73:153:24:2809,0,24,3717
11	48367097	rs73453179	A	G	1252.64	PASS	AC=1;AF=0.333;AN=3;BaseQRankSum=0.980;ClippingRankSum=0.000;DB;DP=131;FS=2.263;MLEAC=1;MLEAF=0.333;MQ=60.00;MQ0=0;MQRankSum=0.000;QD=9.56;ReadPosRankSum=-0.017;SOR=0.669;VQSLOD=19.34;culprit=DP;ANN=G|missense_variant|MODERATE|OR4C45|OR4C45|transcript|NM_001005513.1|protein_coding|2/2|c.722T>C|p.Ile241Thr|722/919|722/919|241/305||WARNING_TRANSCRIPT_MULTIPLE_STOP_CODONS	GT:AD:DP:GQ:PL	0/0/1:81,50:131:92:1280,0,92,2251
11	48367155	rs75315666	T	A	2009.64	PASS	AC=1;AF=0.333;AN=3;BaseQRankSum=2.695;ClippingRankSum=0.000;DB;DP=128;FS=2.267;MLEAC=1;MLEAF=0.333;MQ=60.00;MQ0=0;MQRankSum=0.000;QD=15.70;ReadPosRankSum=-0.010;SOR=0.810;VQSLOD=19.51;culprit=DP;ANN=A|missense_variant|MODERATE|OR4C45|OR4C45|transcript|NM_001005513.1|protein_coding|2/2|c.664A>T|p.Thr222Ser|664/919|664/919|222/305||WARNING_TRANSCRIPT_MULTIPLE_STOP_CODONS	GT:AD:DP:GQ:PL	0/0/1:76,52:128:69:2037,0,69,3072
11	48367163	rs74650698	A	G	2257.64	PASS	AC=1;AF=0.333;AN=3;BaseQRankSum=-1.313;ClippingRankSum=0.000;DB;DP=128;FS=2.259;MLEAC=1;MLEAF=0.333;MQ=60.00;MQ0=0;MQRankSum=0.000;QD=17.64;ReadPosRankSum=-1.199;SOR=0.745;VQSLOD=19.37;culprit=DP;ANN=G|missense_variant|MODERATE|OR4C45|OR4C45|transcript|NM_001005513.1|protein_coding|2/2|c.656T>C|p.Phe219Ser|656/919|656/919|219/305||WARNING_TRANSCRIPT_MULTIPLE_STOP_CODONS	GT:AD:DP:GQ:PL	0/0/1:70,58:128:39:2285,0,39,2870
11	48367190	rs78661795	A	T	2131.64	PASS	AC=1;AF=0.333;AN=3;BaseQRankSum=-1.276;ClippingRankSum=0.000;DB;DP=132;FS=1.390;MLEAC=1;MLEAF=0.333;MQ=60.00;MQ0=0;MQRankSum=0.000;QD=16.15;ReadPosRankSum=0.827;SOR=0.556;VQSLOD=19.10;culprit=DP;ANN=T|missense_variant|MODERATE|OR4C45|OR4C45|transcript|NM_001005513.1|protein_coding|2/2|c.629T>A|p.Val210Asp|629/919|629/919|210/305||WARNING_TRANSCRIPT_MULTIPLE_STOP_CODONS	GT:AD:DP:GQ:PL	0/0/1:75,57:132:57:2159,0,57,2969
11	48367195	rs79063955	C	T	2095.64	PASS	AC=1;AF=0.333;AN=3;BaseQRankSum=-0.528;ClippingRankSum=0.000;DB;DP=133;FS=2.229;MLEAC=1;MLEAF=0.333;MQ=60.00;MQ0=0;MQRankSum=0.000;QD=15.76;ReadPosRankSum=1.294;SOR=0.494;VQSLOD=18.92;culprit=DP;ANN=T|missense_variant|MODERATE|OR4C45|OR4C45|transcript|NM_001005513.1|protein_coding|2/2|c.624G>A|p.Met208Ile|624/919|624/919|208/305||WARNING_TRANSCRIPT_MULTIPLE_STOP_CODONS	GT:AD:DP:GQ:PL	0/0/1:76,57:133:60:2123,0,60,2999
11	48367311	rs73453180	T	C	1222.64	PASS	AC=1;AF=0.333;AN=3;BaseQRankSum=-4.667;ClippingRankSum=0.000;DB;DP=153;FS=2.991;MLEAC=1;MLEAF=0.333;MQ=60.00;MQ0=0;MQRankSum=0.000;QD=7.99;ReadPosRankSum=0.502;SOR=0.876;VQSLOD=17.21;culprit=DP;ANN=C|missense_variant|MODERATE|OR4C45|OR4C45|transcript|NM_001005513.1|protein_coding|2/2|c.508A>G|p.Asn170Asp|508/919|508/919|170/305||WARNING_TRANSCRIPT_MULTIPLE_STOP_CODONS	GT:AD:DP:GQ:PL	0/0/1:97,56:153:99:1250,0,122,2695
11	48367419	rs77576379	G	A	971.64	PASS	AC=1;AF=0.333;AN=3;BaseQRankSum=-0.283;ClippingRankSum=0.000;DB;DP=118;FS=5.191;MLEAC=1;MLEAF=0.333;MQ=60.00;MQ0=0;MQRankSum=0.000;QD=8.23;ReadPosRankSum=-1.015;SOR=0.717;VQSLOD=20.29;culprit=DP;ANN=A|missense_variant|MODERATE|OR4C45|OR4C45|transcript|NM_001005513.1|protein_coding|2/2|c.400C>T|p.Pro134Ser|400/919|400/919|134/305||WARNING_TRANSCRIPT_MULTIPLE_STOP_CODONS	GT:AD:DP:GQ:PL	0/0/1:87,31:118:99:999,0,172,3578
11	48367424	rs77976451	C	G	911.64	PASS	AC=1;AF=0.333;AN=3;BaseQRankSum=-1.070;ClippingRankSum=0.000;DB;DP=116;FS=4.166;MLEAC=1;MLEAF=0.333;MQ=60.00;MQ0=0;MQRankSum=0.000;QD=7.86;ReadPosRankSum=-1.084;SOR=0.610;VQSLOD=20.34;culprit=DP;ANN=G|missense_variant|MODERATE|OR4C45|OR4C45|transcript|NM_001005513.1|protein_coding|2/2|c.395G>C|p.Ser132Thr|395/919|395/919|132/305||WARNING_TRANSCRIPT_MULTIPLE_STOP_CODONS	GT:AD:DP:GQ:PL	0/0/1:88,28:116:99:939,0,184,3649
11	48367470	rs80201516	G	A	107.64	PASS	AC=1;AF=0.333;AN=3;BaseQRankSum=2.139;ClippingRankSum=0.000;DB;DP=89;FS=0.000;MLEAC=1;MLEAF=0.333;MQ=60.00;MQ0=0;MQRankSum=0.000;QD=1.21;ReadPosRankSum=-2.713;SOR=0.941;VQSLOD=20.76;culprit=ReadPosRankSum;ANN=A|missense_variant|MODERATE|OR4C45|OR4C45|transcript|NM_001005513.1|protein_coding|2/2|c.349C>T|p.His117Tyr|349/919|349/919|117/305||WARNING_TRANSCRIPT_MULTIPLE_STOP_CODONS	GT:AD:DP:GQ:PL	0/0/1:82,7:89:99:135,0,229,3519
11	48373748	rs73453188	C	G	2325.67	PASS	AC=1;AF=0.333;AN=3;BaseQRankSum=-3.244;ClippingRankSum=0.000;DB;DP=132;FS=2.187;MLEAC=1;MLEAF=0.333;MQ=60.00;MQ0=0;MQRankSum=0.000;QD=17.62;ReadPosRankSum=0.950;SOR=0.899;VQSLOD=19.03;culprit=DP;ANN=G|missense_variant|MODERATE|OR4C45|OR4C45|transcript|NM_001005513.1|protein_coding|1/2|c.252G>C|p.Lys84Asn|252/919|252/919|84/305||WARNING_TRANSCRIPT_MULTIPLE_STOP_CODONS	GT:AD:DP:GQ:PL	0/0/1:69,63:132:21:2353,0,21,3519
11	48373770	rs73453191	T	A	2466.97	PASS	AC=1;AF=0.333;AN=3;BaseQRankSum=-0.660;ClippingRankSum=0.000;DB;DP=138;FS=0.627;MLEAC=1;MLEAF=0.333;MQ=60.00;MQ0=0;MQRankSum=0.000;QD=17.88;ReadPosRankSum=1.409;SOR=0.764;VQSLOD=18.40;culprit=DP;ANN=A|missense_variant|MODERATE|OR4C45|OR4C45|transcript|NM_001005513.1|protein_coding|1/2|c.230A>T|p.Asn77Ile|230/919|230/919|77/305||WARNING_TRANSCRIPT_MULTIPLE_STOP_CODONS	GT:AD:DP:GQ:PL	0/0/1:72,66:138:11:2494,0,11,3502
11	48373797	rs72896825	C	T	2339.64	PASS	AC=1;AF=0.333;AN=3;BaseQRankSum=0.054;ClippingRankSum=0.000;DB;DP=135;FS=0.000;MLEAC=1;MLEAF=0.333;MQ=60.00;MQ0=0;MQRankSum=0.000;QD=17.33;ReadPosRankSum=2.227;SOR=0.667;VQSLOD=18.41;culprit=DP;ANN=T|missense_variant|MODERATE|OR4C45|OR4C45|transcript|NM_001005513.1|protein_coding|1/2|c.203G>A|p.Cys68Tyr|203/919|203/919|68/305||WARNING_TRANSCRIPT_MULTIPLE_STOP_CODONS	GT:AD:DP:GQ:PL	0/0/1:73,62:135:31:2367,0,31,5491
11	48373815	rs74350365	A	G	2409.64	PASS	AC=1;AF=0.333;AN=3;BaseQRankSum=0.253;ClippingRankSum=0.000;DB;DP=135;FS=0.633;MLEAC=1;MLEAF=0.333;MQ=60.00;MQ0=0;MQRankSum=0.000;QD=17.85;ReadPosRankSum=1.143;SOR=0.633;VQSLOD=18.75;culprit=DP;ANN=G|missense_variant|MODERATE|OR4C45|OR4C45|transcript|NM_001005513.1|protein_coding|1/2|c.185T>C|p.Phe62Ser|185/919|185/919|62/305||WARNING_TRANSCRIPT_MULTIPLE_STOP_CODONS	GT:AD:DP:GQ:PL	0/0/1:73,62:135:42:2437,0,42,5666
11	48373820	rs3898634	A	C	359.64	PASS	AC=1;AF=0.333;AN=3;BaseQRankSum=-0.383;ClippingRankSum=0.000;DB;DP=137;FS=0.000;MLEAC=1;MLEAF=0.333;MQ=60.00;MQ0=0;MQRankSum=0.000;QD=2.63;ReadPosRankSum=1.232;SOR=0.753;VQSLOD=18.67;culprit=DP;ANN=C|stop_gained|HIGH|OR4C45|OR4C45|transcript|NM_001005513.1|protein_coding|1/2|c.180T>G|p.Tyr60*|180/919|180/919|60/305||WARNING_TRANSCRIPT_MULTIPLE_STOP_CODONS;LOF=(OR4C45|OR4C45|1|1.00);NMD=(OR4C45|OR…	GT:AD:DP:GQ:PL	0/0/1:116,21:137:99:387,0,289,7126
11	48373833	rs75965588	G	A	2378.64	PASS	AC=1;AF=0.333;AN=3;BaseQRankSum=2.499;ClippingRankSum=0.000;DB;DP=141;FS=0.000;MLEAC=1;MLEAF=0.333;MQ=60.00;MQ0=0;MQRankSum=0.000;QD=16.87;ReadPosRankSum=0.208;SOR=0.697;VQSLOD=18.39;culprit=DP;ANN=A|missense_variant|MODERATE|OR4C45|OR4C45|transcript|NM_001005513.1|protein_coding|1/2|c.167C>T|p.Ser56Phe|167/919|167/919|56/305||WARNING_TRANSCRIPT_MULTIPLE_STOP_CODONS	GT:AD:DP:GQ:PL	0/0/1:78,63:141:42:2406,0,42,5337
11	48373834	rs75261463	A	G	2378.64	PASS	AC=1;AF=0.333;AN=3;BaseQRankSum=1.196;ClippingRankSum=0.000;DB;DP=141;FS=0.623;MLEAC=1;MLEAF=0.333;MQ=60.00;MQ0=0;MQRankSum=0.000;QD=16.87;ReadPosRankSum=0.351;SOR=0.761;VQSLOD=18.36;culprit=DP;ANN=G|missense_variant|MODERATE|OR4C45|OR4C45|transcript|NM_001005513.1|protein_coding|1/2|c.166T>C|p.Ser56Pro|166/919|166/919|56/305||WARNING_TRANSCRIPT_MULTIPLE_STOP_CODONS	GT:AD:DP:GQ:PL	0/0/1:78,63:141:42:2406,0,42,5337
11	48373885	rs76292854	A	G	2379.64	PASS	AC=1;AF=0.333;AN=3;BaseQRankSum=2.683;ClippingRankSum=0.000;DB;DP=147;FS=0.615;MLEAC=1;MLEAF=0.333;MQ=60.00;MQ0=0;MQRankSum=0.000;QD=16.19;ReadPosRankSum=-0.994;SOR=0.800;VQSLOD=17.74;culprit=DP;ANN=G|missense_variant|MODERATE|OR4C45|OR4C45|transcript|NM_001005513.1|protein_coding|1/2|c.115T>C|p.Phe39Leu|115/919|115/919|39/305||WARNING_TRANSCRIPT_MULTIPLE_STOP_CODONS	GT:AD:DP:GQ:PL	0/0/1:82,65:147:47:2407,0,47,3098
11	48373986	rs12420054	A	G	3064.64	PASS	AC=2;AF=0.667;AN=3;BaseQRankSum=-2.913;ClippingRankSum=0.000;DB;DP=142;FS=0.000;MLEAC=2;MLEAF=0.667;MQ=60.00;MQ0=0;MQRankSum=0.000;QD=21.58;ReadPosRankSum=0.102;SOR=0.746;VQSLOD=18.15;culprit=DP;ANN=G|missense_variant|MODERATE|OR4C45|OR4C45|transcript|NM_001005513.1|protein_coding|1/2|c.14T>C|p.Ile5Thr|14/919|14/919|5/305||WARNING_TRANSCRIPT_MULTIPLE_STOP_CODONS	GT:AD:DP:GQ:PL	0/1/1:66,76:142:42:3092,42,0,2504
11	56143250	rs76390346	G	A	2895.64	PASS	AC=2;AF=0.667;AN=3;BaseQRankSum=-1.477;ClippingRankSum=0.000;DB;DP=127;FS=4.363;MLEAC=2;MLEAF=0.667;MQ=60.00;MQ0=0;MQRankSum=0.000;QD=23.17;ReadPosRankSum=-1.410;SOR=1.131;VQSLOD=19.31;culprit=DP;ANN=A|missense_variant|MODERATE|OR8U8|OR8U8|transcript|NM_001013356.2|protein_coding|1/2|c.151G>A|p.Ala51Thr|151/864|151/864|51/287||WARNING_TRANSCRIPT_NO_STOP_CODON,A|missense_variant|MODERATE|OR8U1|OR8…	GT:AD:DP:GQ:PL	0/1/1:56,69:125:48:2923,48,0,3271
11	56143257	rs77515824	C	A	2841.64	PASS	AC=2;AF=0.667;AN=3;BaseQRankSum=3.043;ClippingRankSum=0.000;DB;DP=127;FS=2.313;MLEAC=2;MLEAF=0.667;MQ=60.00;MQ0=0;MQRankSum=0.000;QD=22.55;ReadPosRankSum=-1.584;SOR=0.980;VQSLOD=19.21;culprit=DP;ANN=A|missense_variant|MODERATE|OR8U8|OR8U8|transcript|NM_001013356.2|protein_coding|1/2|c.158C>A|p.Thr53Lys|158/864|158/864|53/287||WARNING_TRANSCRIPT_NO_STOP_CODON,A|missense_variant|MODERATE|OR8U1|OR8U…	GT:AD:DP:GQ:PL	0/1/1:55,71:126:45:2869,45,0,3136
11	56143539	rs75226392	T	C	3060.61	PASS	AC=2;AF=0.667;AN=3;BaseQRankSum=0.622;ClippingRankSum=0.000;DB;DP=152;FS=11.331;MLEAC=2;MLEAF=0.667;MQ=60.00;MQ0=0;MQRankSum=0.000;QD=20.14;ReadPosRankSum=1.580;SOR=0.665;VQSLOD=17.39;culprit=DP;ANN=C|missense_variant|MODERATE|OR8U8|OR8U8|transcript|NM_001013356.2|protein_coding|1/2|c.440T>C|p.Val147Ala|440/864|440/864|147/287||WARNING_TRANSCRIPT_NO_STOP_CODON,C|missense_variant|MODERATE|OR8U1|OR…	GT:AD:DP:GQ:PL	0/1/1:76,76:152:6:3087,6,0,3963
11	56143544	rs78532946	T	C	3198.67	PASS	AC=2;AF=0.667;AN=3;BaseQRankSum=-0.450;ClippingRankSum=0.000;DB;DP=157;FS=9.601;MLEAC=2;MLEAF=0.667;MQ=60.00;MQ0=0;MQRankSum=0.000;QD=20.37;ReadPosRankSum=0.395;SOR=0.580;VQSLOD=17.16;culprit=DP;ANN=C|missense_variant|MODERATE|OR8U8|OR8U8|transcript|NM_001013356.2|protein_coding|1/2|c.445T>C|p.Tyr149His|445/864|445/864|149/287||WARNING_TRANSCRIPT_NO_STOP_CODON,C|missense_variant|MODERATE|OR8U1|OR…	GT:AD:DP:GQ:PL	0/1/1:75,82:157:21:3226,21,0,3947
11	56143592	rs17150411	C	T	302.64	PASS	AC=1;AF=0.333;AN=3;BaseQRankSum=4.097;ClippingRankSum=0.000;DB;DP=146;FS=2.040;MLEAC=1;MLEAF=0.333;MQ=60.00;MQ0=0;MQRankSum=0.000;POSITIVE_TRAIN_SITE;QD=2.09;ReadPosRankSum=1.096;SOR=1.022;VQSLOD=19.50;culprit=DP;ANN=T|missense_variant|MODERATE|OR8U8|OR8U8|transcript|NM_001013356.2|protein_coding|1/2|c.493C>T|p.Arg165Cys|493/864|493/864|165/287||WARNING_TRANSCRIPT_NO_STOP_CODON,T|missense_variant…	GT:AD:DP:GQ:PL	0/0/1:126,19:145:99:330,0,324,4552
11	56468416	rs11228735	G	A	375.64	PASS	AC=1;AF=0.333;AN=3;BaseQRankSum=0.385;ClippingRankSum=0.000;DB;DP=118;FS=1.093;MLEAC=1;MLEAF=0.333;MQ=60.00;MQ0=0;MQRankSum=0.000;POSITIVE_TRAIN_SITE;QD=3.18;ReadPosRankSum=-0.404;SOR=0.976;VQSLOD=21.92;culprit=QD;ANN=A|missense_variant|MODERATE|OR9G1|OR9G1|transcript|NM_001005213.1|protein_coding|1/1|c.553G>A|p.Glu185Lys|553/918|553/918|185/305||,A|missense_variant|MODERATE|OR9G9|OR9G9|transcrip…	GT:AD:DP:GQ:PL	0/0/1:104,14:118:99:403,0,277,4531
11	56468449	rs78119083	A	T	593.64	PASS	AC=1;AF=0.333;AN=3;BaseQRankSum=-1.425;ClippingRankSum=0.000;DB;DP=113;FS=3.416;MLEAC=1;MLEAF=0.333;MQ=60.00;MQ0=0;MQRankSum=0.000;QD=5.25;ReadPosRankSum=-2.281;SOR=1.112;VQSLOD=20.08;culprit=ReadPosRankSum;ANN=T|missense_variant|MODERATE|OR9G1|OR9G1|transcript|NM_001005213.1|protein_coding|1/1|c.586A>T|p.Ile196Phe|586/918|586/918|196/305||,T|missense_variant|MODERATE|OR9G9|OR9G9|transcript|NM_00…	GT:AD:DP:GQ:PL	0/0/1:94,19:113:99:621,0,232,4082
11	56468452	rs79970235	A	C	596.64	PASS	AC=1;AF=0.333;AN=3;BaseQRankSum=-1.857;ClippingRankSum=0.000;DB;DP=114;FS=2.064;MLEAC=1;MLEAF=0.333;MQ=60.00;MQ0=0;MQRankSum=0.000;QD=5.23;ReadPosRankSum=-2.396;SOR=0.994;VQSLOD=19.96;culprit=ReadPosRankSum;ANN=C|missense_variant|MODERATE|OR9G1|OR9G1|transcript|NM_001005213.1|protein_coding|1/1|c.589A>C|p.Met197Leu|589/918|589/918|197/305||,C|missense_variant|MODERATE|OR9G9|OR9G9|transcript|NM_00…	GT:AD:DP:GQ:PL	0/0/1:94,20:114:99:624,0,226,3995
11	56468699	rs79251113	T	A	684.64	PASS	AC=1;AF=0.333;AN=3;BaseQRankSum=-0.570;ClippingRankSum=0.000;DB;DP=143;FS=3.034;MLEAC=1;MLEAF=0.333;MQ=60.00;MQ0=0;MQRankSum=0.000;QD=4.79;ReadPosRankSum=0.082;SOR=0.424;VQSLOD=18.25;culprit=DP;ANN=A|missense_variant|MODERATE|OR9G1|OR9G1|transcript|NM_001005213.1|protein_coding|1/1|c.836T>A|p.Val279Glu|836/918|836/918|279/305||,A|missense_variant|MODERATE|OR9G9|OR9G9|transcript|NM_001013358.2|pro…	GT:AD:DP:GQ:PL	0/0/1:120,23:143:99:712,0,295,6726
11	56468704	rs79288825	T	C	682.64	PASS	AC=1;AF=0.333;AN=3;BaseQRankSum=-0.442;ClippingRankSum=0.000;DB;DP=142;FS=4.642;MLEAC=1;MLEAF=0.333;MQ=60.00;MQ0=0;MQRankSum=0.000;QD=4.81;ReadPosRankSum=0.134;SOR=0.312;VQSLOD=18.41;culprit=DP;ANN=C|missense_variant|MODERATE|OR9G1|OR9G1|transcript|NM_001005213.1|protein_coding|1/1|c.841T>C|p.Phe281Leu|841/918|841/918|281/305||,C|missense_variant|MODERATE|OR9G9|OR9G9|transcript|NM_001013358.2|pro…	GT:AD:DP:GQ:PL	0/0/1:120,22:142:99:710,0,298,6745
11	56468720	rs66943455	T	C	416.64	PASS	AC=1;AF=0.333;AN=3;BaseQRankSum=-1.080;ClippingRankSum=0.000;DB;DP=146;FS=3.209;MLEAC=1;MLEAF=0.333;MQ=60.00;MQ0=0;MQRankSum=0.000;QD=2.85;ReadPosRankSum=-0.130;SOR=0.368;VQSLOD=17.93;culprit=DP;ANN=C|missense_variant|MODERATE|OR9G1|OR9G1|transcript|NM_001005213.1|protein_coding|1/1|c.857T>C|p.Leu286Pro|857/918|857/918|286/305||,C|missense_variant|MODERATE|OR9G9|OR9G9|transcript|NM_001013358.2|pr…	GT:AD:DP:GQ:PL	0/0/1:123,23:146:99:444,0,299,3828
11	62300693	.	G	C	1340.64	PASS	AC=2;AF=0.667;AN=3;BaseQRankSum=-0.425;ClippingRankSum=0.000;DP=76;FS=6.358;MLEAC=2;MLEAF=0.667;MQ=60.00;MQ0=0;MQRankSum=0.000;QD=17.64;ReadPosRankSum=-0.523;SOR=1.232;VQSLOD=21.85;culprit=MQ;ANN=C|missense_variant|MODERATE|AHNAK|AHNAK|transcript|NM_001620.2|protein_coding|5/5|c.1196C>G|p.Ala399Gly|1496/18815|1196/17673|399/5890||	GT:AD:DP:GQ:PL	0/1/1:28,48:76:59:1368,59,0,708
11	62397883	.	T	C	386.64	PASS	AC=1;AF=0.333;AN=3;BaseQRankSum=-0.830;ClippingRankSum=0.000;DP=63;FS=5.627;MLEAC=1;MLEAF=0.333;MQ=60.00;MQ0=0;MQRankSum=0.000;QD=6.14;ReadPosRankSum=0.244;SOR=1.066;VQSLOD=21.75;culprit=QD;ANN=C|missense_variant|MODERATE|GANAB|GANAB|transcript|NM_198335.3|protein_coding|13/25|c.1547A>G|p.Asp516Gly|1674/4017|1547/2901|516/966||	GT:AD:DP:GQ:PL	0/0/1:45,18:63:81:414,0,81,1275
11	63993328	.	T	A	514.64	PASS	AC=1;AF=0.333;AN=3;BaseQRankSum=-1.162;ClippingRankSum=0.000;DP=66;FS=4.830;MLEAC=1;MLEAF=0.333;MQ=60.00;MQ0=0;MQRankSum=0.000;QD=7.80;ReadPosRankSum=1.588;SOR=0.900;VQSLOD=21.54;culprit=MQ;ANN=A|missense_variant|MODERATE|TRPT1|TRPT1|transcript|NM_001160389.1|protein_coding|2/8|c.5A>T|p.Asn2Ile|219/1059|5/768|2/255||,A|upstream_gene_variant|MODIFIER|NUDT22|NUDT22|transcript|NM_001128612.2|protein…	GT:AD:DP:GQ:PL	0/0/1:40,26:66:43:542,0,43,1054
11	88300561	.	C	A	675.64	PASS	AC=1;AF=0.333;AN=3;BaseQRankSum=0.520;ClippingRankSum=0.000;DP=97;FS=9.057;MLEAC=1;MLEAF=0.333;MQ=60.00;MQ0=0;MQRankSum=0.000;QD=6.97;ReadPosRankSum=-0.289;SOR=1.236;VQSLOD=21.50;culprit=MQ;ANN=A|missense_variant|MODERATE|GRM5|GRM5|transcript|NM_001143831.2|protein_coding|7/9|c.2290G>T|p.Val764Phe|2490/7855|2290/3639|764/1212||	GT:AD:DP:GQ:PL	0/0/1:67,30:97:99:703,0,111,1883
11	92901184	.	G	T	540.64	PASS	AC=1;AF=0.333;AN=3;BaseQRankSum=-1.918;ClippingRankSum=0.000;DP=70;FS=2.126;MLEAC=1;MLEAF=0.333;MQ=60.00;MQ0=0;MQRankSum=0.000;QD=7.72;ReadPosRankSum=0.089;SOR=0.444;VQSLOD=21.73;culprit=MQ;ANN=T|missense_variant|MODERATE|SLC36A4|SLC36A4|transcript|NM_152313.3|protein_coding|7/11|c.694C>A|p.Leu232Ile|837/6024|694/1515|232/504||	GT:AD:DP:GQ:PL	0/0/1:47,23:70:71:568,0,71,1372
11	99690286	rs10790978	T	G	1015.64	PASS	AC=1;AF=0.333;AN=3;BaseQRankSum=3.370;ClippingRankSum=0.000;DB;DP=107;FS=2.105;MLEAC=1;MLEAF=0.333;MQ=60.00;MQ0=0;MQRankSum=0.000;QD=10.58;ReadPosRankSum=0.055;SOR=1.091;VQSLOD=20.89;culprit=MQ;ANN=G|missense_variant|MODERATE|CNTN5|CNTN5|transcript|NM_001243270.1|protein_coding|3/24|c.67T>G|p.Ser23Ala|432/6333|67/3303|23/1100||	GT:AD:DP:GQ:PL	0/0/1:57,39:96:53:1043,0,53,1547
11	99690428	rs7125822	T	G	1470.68	PASS	AC=2;AF=0.667;AN=3;BaseQRankSum=-5.950;ClippingRankSum=0.000;DB;DP=120;FS=0.682;MLEAC=2;MLEAF=0.667;MQ=60.00;MQ0=0;MQRankSum=0.000;QD=12.46;ReadPosRankSum=-1.668;SOR=0.613;VQSLOD=19.94;culprit=DP;ANN=G|missense_variant|MODERATE|CNTN5|CNTN5|transcript|NM_001243270.1|protein_coding|3/24|c.209T>G|p.Leu70Arg|574/6333|209/3303|70/1100||	GT:AD:DP:GQ:PL	0/1/1:55,63:118:20:1498,20,0,1500
11	111156524	.	G	A	611.64	PASS	AC=1;AF=0.333;AN=3;BaseQRankSum=0.383;ClippingRankSum=0.000;DP=68;FS=0.933;MLEAC=1;MLEAF=0.333;MQ=60.00;MQ0=0;MQRankSum=0.000;QD=8.99;ReadPosRankSum=0.114;SOR=0.846;VQSLOD=21.76;culprit=MQ;ANN=A|stop_gained|HIGH|C11orf53|C11orf53|transcript|NM_198498.2|protein_coding|4/4|c.456G>A|p.Trp152*|603/1208|456/711|152/236||	GT:AD:DP:GQ:PL	0/0/1:42,26:68:48:639,0,48,1198
11	119169190	.	G	C	467.64	PASS	AC=1;AF=0.333;AN=3;BaseQRankSum=-1.816;ClippingRankSum=0.000;DP=74;FS=0.000;MLEAC=1;MLEAF=0.333;MQ=60.00;MQ0=0;MQRankSum=0.000;QD=6.32;ReadPosRankSum=0.809;SOR=0.811;VQSLOD=21.71;culprit=QD;ANN=C|missense_variant|MODERATE|CBL|CBL|transcript|NM_005188.3|protein_coding|15/16|c.2374G>C|p.Asp792His|2516/11231|2374/2721|792/906||	GT:AD:DP:GQ:PL	0/0/1:53,21:74:96:495,0,96,1572
11	125875659	.	G	C	1679.64	PASS	AC=2;AF=0.667;AN=3;BaseQRankSum=2.587;ClippingRankSum=0.000;DP=82;FS=2.119;MLEAC=2;MLEAF=0.667;MQ=60.00;MQ0=0;MQRankSum=0.000;QD=20.74;ReadPosRankSum=-0.056;SOR=0.994;VQSLOD=21.55;culprit=MQ;ANN=C|missense_variant|MODERATE|CDON|CDON|transcript|NM_001243597.1|protein_coding|9/20|c.1846C>G|p.Arg616Gly|1974/8116|1846/3864|616/1287||	GT:AD:DP:GQ:PL	0/1/1:21,60:81:99:1707,115,0,441
11	129306723	.	G	C	887.64	PASS	AC=2;AF=0.667;AN=3;BaseQRankSum=-0.432;ClippingRankSum=0.000;DP=44;FS=0.000;MLEAC=2;MLEAF=0.667;MQ=60.00;MQ0=0;MQRankSum=0.000;QD=20.17;ReadPosRankSum=0.582;SOR=0.546;VQSLOD=21.21;culprit=MQ;ANN=C|missense_variant|MODERATE|BARX2|BARX2|transcript|NM_003658.4|protein_coding|2/4|c.265G>C|p.Ala89Pro|315/1767|265/840|89/279||	GT:AD:DP:GQ:PL	0/1/1:11,33:44:65:915,65,0,245
11	130319580	.	C	A	518.64	PASS	AC=1;AF=0.333;AN=3;BaseQRankSum=-0.990;ClippingRankSum=0.000;DP=61;FS=0.992;MLEAC=1;MLEAF=0.333;MQ=60.00;MQ0=0;MQRankSum=0.000;QD=8.50;ReadPosRankSum=0.206;SOR=0.557;VQSLOD=21.69;culprit=MQ;ANN=A|missense_variant|MODERATE|ADAMTS15|ADAMTS15|transcript|NM_139055.3|protein_coding|1/8|c.712C>A|p.Leu238Met|712/5677|712/2853|238/950||	GT:AD:DP:GQ:PL	0/0/1:39,22:61:51:546,0,51,1140
11	130780225	rs681982	C	A	842.64	PASS	AC=3;AF=1.00;AN=3;DB;DP=27;FS=0.000;MLEAC=3;MLEAF=1.00;MQ=60.00;MQ0=0;POSITIVE_TRAIN_SITE;QD=31.21;SOR=0.765;VQSLOD=20.46;culprit=MQ;ANN=A|missense_variant|MODERATE|SNX19|SNX19|transcript|NM_014758.2|protein_coding|3/11|c.1854G>T|p.Leu618Phe|2402/6078|1854/2979|618/992||	GT:AD:DP:GQ:PL	1/1/1:0,27:27:47:870,129,47,0
12	6161758	.	C	T	2031.77	PASS	AC=2;AF=1.00;AN=2;DP=62;ExcessHet=3.0103;FS=0.000;MLEAC=2;MLEAF=1.00;MQ=60.00;MQ0=0;QD=32.77;SOR=0.976;VQSLOD=19.40;culprit=QD;ANN=T|missense_variant|MODERATE|VWF|VWF|transcript|NM_000552.4|protein_coding|16/52|c.2137G>A|p.Gly713Ser|2392/8838|2137/8442|713/2813||	GT:AD:DP:GQ:PL	1/1:0,62:62:99:2060,186,0
12	6937708	.	C	G	531.77	PASS	AC=2;AF=1.00;AN=2;DP=21;ExcessHet=3.0103;FS=0.000;MLEAC=2;MLEAF=1.00;MQ=60.00;MQ0=0;QD=25.32;SOR=4.712;VQSLOD=16.30;culprit=QD;ANN=G|missense_variant|MODERATE|P3H3|P3H3|transcript|NM_014262.4|protein_coding|1/15|c.103C>G|p.Gln35Glu|171/2669|103/2208|35/735||,G|downstream_gene_variant|MODIFIER|GPR162|GPR162|transcript|NM_019858.1|protein_coding||c.*1339C>G|||||1125|	GT:AD:DP:GQ:PL	1/1:0,21:21:61:560,61,0
12	26589152	.	G	T	624.64	PASS	AC=1;AF=0.333;AN=3;BaseQRankSum=-0.565;ClippingRankSum=0.000;DP=72;FS=14.048;MLEAC=1;MLEAF=0.333;MQ=60.00;MQ0=0;MQRankSum=0.000;QD=8.80;ReadPosRankSum=-2.166;SOR=0.241;VQSLOD=20.31;culprit=FS;ANN=T|splice_donor_variant&intron_variant|HIGH|ITPR2|ITPR2|transcript|NM_002223.3|protein_coding|48/56|c.6769+2C>A||||||;LOF=(ITPR2|ITPR2|1|1.00)	GT:AD:DP:GQ:PL	0/0/1:44,27:71:51:652,0,51,1260
12	40884533	rs12822472	G	T	2135.64	PASS	AC=3;AF=1.00;AN=3;DB;DP=69;FS=0.000;MLEAC=3;MLEAF=1.00;MQ=59.45;MQ0=0;QD=31.41;SOR=1.352;VQSLOD=4.83;culprit=MQ;ANN=T|missense_variant|MODERATE|MUC19|MUC19|transcript|NM_173600.2|protein_coding|56/173|c.17779G>T|p.Gly5927Cys|17833/24829|17779/24666|5927/8221||WARNING_TRANSCRIPT_MULTIPLE_STOP_CODONS	GT:AD:DP:GQ:PL	1/1/1:0,68:68:99:2163,322,119,0
12	40907337	rs80207539	C	T	2415.91	PASS	AC=2;AF=0.667;AN=3;BaseQRankSum=1.448;ClippingRankSum=0.000;DB;DP=121;FS=0.677;MLEAC=2;MLEAF=0.667;MQ=60.00;MQ0=0;MQRankSum=0.000;QD=19.97;ReadPosRankSum=-1.023;SOR=0.781;VQSLOD=19.87;culprit=DP;ANN=T|missense_variant|MODERATE|MUC19|MUC19|transcript|NM_173600.2|protein_coding|84/173|c.19820C>T|p.Thr6607Ile|19874/24829|19820/24666|6607/8221||WARNING_TRANSCRIPT_MULTIPLE_STOP_CODONS	GT:AD:DP:GQ:PL	0/1/1:59,62:121:12:2443,12,0,2263
12	40907346	rs77324563	C	T	2334.16	PASS	AC=2;AF=0.667;AN=3;BaseQRankSum=-1.022;ClippingRankSum=0.000;DB;DP=119;FS=0.000;MLEAC=2;MLEAF=0.667;MQ=60.00;MQ0=0;MQRankSum=0.000;QD=19.61;ReadPosRankSum=-0.919;SOR=0.649;VQSLOD=20.06;culprit=DP;ANN=T|missense_variant|MODERATE|MUC19|MUC19|transcript|NM_173600.2|protein_coding|84/173|c.19829C>T|p.Ala6610Val|19883/24829|19829/24666|6610/8221||WARNING_TRANSCRIPT_MULTIPLE_STOP_CODONS	GT:AD:DP:GQ:PL	0/1/1:58,61:119:9:2361,9,0,2226
12	40907352	rs77453597	G	C	2569.71	PASS	AC=2;AF=0.667;AN=3;BaseQRankSum=2.113;ClippingRankSum=0.000;DB;DP=120;FS=0.000;MLEAC=2;MLEAF=0.667;MQ=60.00;MQ0=0;MQRankSum=0.000;QD=21.41;ReadPosRankSum=-0.795;SOR=0.681;VQSLOD=19.95;culprit=DP;ANN=C|missense_variant|MODERATE|MUC19|MUC19|transcript|NM_173600.2|protein_coding|84/173|c.19835G>C|p.Gly6612Ala|19889/24829|19835/24666|6612/8221||WARNING_TRANSCRIPT_MULTIPLE_STOP_CODONS	GT:AD:DP:GQ:PL	0/1/1:58,62:120:18:2597,18,0,2324
12	40907569	rs78204462	A	G	2770.64	PASS	AC=2;AF=0.667;AN=3;BaseQRankSum=-0.697;ClippingRankSum=0.000;DB;DP=118;FS=0.698;MLEAC=2;MLEAF=0.667;MQ=60.00;MQ0=0;MQRankSum=0.000;QD=23.48;ReadPosRankSum=-0.964;SOR=0.678;VQSLOD=19.96;culprit=DP;ANN=G|missense_variant|MODERATE|MUC19|MUC19|transcript|NM_173600.2|protein_coding|85/173|c.19904A>G|p.Asn6635Ser|19958/24829|19904/24666|6635/8221||WARNING_TRANSCRIPT_MULTIPLE_STOP_CODONS	GT:AD:DP:GQ:PL	0/1/1:48,70:118:66:2798,66,0,4447
12	40907571	rs78409264	A	G	2770.64	PASS	AC=2;AF=0.667;AN=3;BaseQRankSum=-3.415;ClippingRankSum=0.000;DB;DP=118;FS=0.698;MLEAC=2;MLEAF=0.667;MQ=60.00;MQ0=0;MQRankSum=0.000;QD=23.48;ReadPosRankSum=-0.265;SOR=0.678;VQSLOD=20.01;culprit=DP;ANN=G|missense_variant|MODERATE|MUC19|MUC19|transcript|NM_173600.2|protein_coding|85/173|c.19906A>G|p.Ile6636Val|19960/24829|19906/24666|6636/8221||WARNING_TRANSCRIPT_MULTIPLE_STOP_CODONS	GT:AD:DP:GQ:PL	0/1/1:48,70:118:66:2798,66,0,4447
12	49949404	.	T	G	491.64	PASS	AC=1;AF=0.333;AN=3;BaseQRankSum=-0.674;ClippingRankSum=0.000;DP=80;FS=0.000;MLEAC=1;MLEAF=0.333;MQ=60.00;MQ0=0;MQRankSum=0.000;QD=6.15;ReadPosRankSum=-1.328;SOR=0.709;VQSLOD=21.56;culprit=QD;ANN=G|missense_variant&splice_region_variant|MODERATE|KCNH3|KCNH3|transcript|NM_012284.2|protein_coding|12/15|c.2138T>G|p.Val713Gly|2398/3871|2138/3252|713/1083||,G|downstream_gene_variant|MODIFIER|MCRS1|MCRS…	GT:AD:DP:GQ:PL	0/0/1:56,24:80:96:519,0,96,1589
12	51135199	.	A	C	794.64	PASS	AC=1;AF=0.333;AN=3;BaseQRankSum=-0.686;ClippingRankSum=0.000;DP=81;FS=0.840;MLEAC=1;MLEAF=0.333;MQ=60.00;MQ0=0;MQRankSum=0.000;QD=9.81;ReadPosRankSum=-0.390;SOR=0.673;VQSLOD=21.70;culprit=MQ;ANN=C|missense_variant&splice_region_variant|MODERATE|DIP2B|DIP2B|transcript|NM_173602.2|protein_coding|37/38|c.4355A>C|p.Glu1452Ala|4511/8715|4355/4731|1452/1576||	GT:AD:DP:GQ:PL	0/0/1:46,35:81:31:822,0,31,1142
12	53045527	.	C	T	1359.64	PASS	AC=2;AF=0.667;AN=3;BaseQRankSum=0.101;ClippingRankSum=0.000;DP=72;FS=1.028;MLEAC=2;MLEAF=0.667;MQ=60.00;MQ0=0;MQRankSum=0.000;QD=19.15;ReadPosRankSum=-1.948;SOR=0.776;VQSLOD=21.39;culprit=ReadPosRankSum;ANN=T|missense_variant|MODERATE|KRT2|KRT2|transcript|NM_000423.2|protein_coding|1/9|c.400G>A|p.Gly134Ser|433/2414|400/1920|134/639||	GT:AD:DP:GQ:PL	0/1/1:19,52:71:95:1387,95,0,413
12	62739050	.	T	C	953.64	PASS	AC=2;AF=0.667;AN=3;BaseQRankSum=1.029;ClippingRankSum=0.000;DP=52;FS=1.139;MLEAC=2;MLEAF=0.667;MQ=60.00;MQ0=0;MQRankSum=0.000;QD=18.34;ReadPosRankSum=-1.972;SOR=0.976;VQSLOD=21.16;culprit=ReadPosRankSum;ANN=C|sequence_feature|MODERATE|USP15|USP15|cross-link:Glycyl_lysine_isopeptide_(Lys-Gly)_(interchain_with_G-Cter_in_ubiquitin)|NM_001252078.1|protein_coding||c.684-3952T>C||||||,C|intron_variant|…	GT:AD:DP:GQ:PL	0/1/1:18,34:52:48:981,48,0,437
12	80651685	.	G	T	390.64	PASS	AC=1;AF=0.333;AN=3;BaseQRankSum=0.007;ClippingRankSum=0.000;DP=72;FS=18.641;MLEAC=1;MLEAF=0.333;MQ=60.00;MQ0=0;MQRankSum=0.000;QD=5.43;ReadPosRankSum=-0.229;SOR=1.759;VQSLOD=18.83;culprit=FS;ANN=T|missense_variant|MODERATE|OTOGL|OTOGL|transcript|NM_173591.3|protein_coding|17/58|c.1765G>T|p.Asp589Tyr|1771/8083|1765/7035|589/2344||	GT:AD:DP:GQ:PL	0/0/1:54,18:72:99:418,0,108,1607
12	80672819	.	G	T	628.64	PASS	AC=1;AF=0.333;AN=3;BaseQRankSum=4.218;ClippingRankSum=0.000;DP=66;FS=0.000;MLEAC=1;MLEAF=0.333;MQ=60.00;MQ0=0;MQRankSum=0.000;QD=9.52;ReadPosRankSum=-1.232;SOR=0.630;VQSLOD=21.66;culprit=MQ;ANN=T|missense_variant|MODERATE|OTOGL|OTOGL|transcript|NM_173591.3|protein_coding|25/58|c.2774G>T|p.Arg925Leu|2780/8083|2774/7035|925/2344||	GT:AD:DP:GQ:PL	0/0/1:41,25:66:48:656,0,48,1064
12	83290161	.	C	A	389.64	PASS	AC=1;AF=0.333;AN=3;BaseQRankSum=2.917;ClippingRankSum=0.000;DP=48;FS=6.718;MLEAC=1;MLEAF=0.333;MQ=60.00;MQ0=0;MQRankSum=0.000;QD=8.12;ReadPosRankSum=-0.232;SOR=1.847;VQSLOD=21.51;culprit=MQ;ANN=A|missense_variant|MODERATE|TMTC2|TMTC2|transcript|NM_152588.2|protein_coding|3/12|c.1219C>A|p.Pro407Thr|1651/5422|1219/2511|407/836||	GT:AD:DP:GQ:PL	0/0/1:32,16:48:47:417,0,47,870
12	88500799	.	C	G	560.64	PASS	AC=1;AF=0.333;AN=3;BaseQRankSum=0.667;ClippingRankSum=0.000;DP=76;FS=0.927;MLEAC=1;MLEAF=0.333;MQ=60.00;MQ0=0;MQRankSum=0.000;QD=7.38;ReadPosRankSum=2.460;SOR=0.859;VQSLOD=21.17;culprit=ReadPosRankSum;ANN=G|missense_variant|MODERATE|CEP290|CEP290|transcript|NM_025114.3|protein_coding|24/54|c.2560G>C|p.Asp854His|2904/7955|2560/7440|854/2479||	GT:AD:DP:GQ:PL	0/0/1:52,24:76:82:588,0,82,1413
12	102499667	.	C	A	47.64	PASS	AC=1;AF=0.333;AN=3;BaseQRankSum=0.709;ClippingRankSum=0.000;DP=29;FS=2.460;MLEAC=1;MLEAF=0.333;MQ=60.00;MQ0=0;MQRankSum=0.000;QD=1.70;ReadPosRankSum=-2.075;SOR=1.179;VQSLOD=19.91;culprit=QD;ANN=A|sequence_feature|MODERATE|NUP37|NUP37|cross-link:Glycyl_lysine_isopeptide_(Lys-Gly)_(interchain_with_G-Cter_in_ubiquitin)|NM_024057.3|protein_coding||c.282-4785G>T||||||,A|intron_variant|MODIFIER|NUP37|N…	GT:AD:DP:GQ:PL	0/0/1:24,4:28:66:75,0,66,3200
12	104142915	.	C	T	867.64	PASS	AC=1;AF=0.333;AN=3;BaseQRankSum=0.038;ClippingRankSum=0.000;DP=90;FS=0.000;MLEAC=1;MLEAF=0.333;MQ=60.00;MQ0=0;MQRankSum=0.000;QD=9.64;ReadPosRankSum=-0.247;SOR=0.624;VQSLOD=21.57;culprit=MQ;ANN=T|missense_variant|MODERATE|STAB2|STAB2|transcript|NM_017564.9|protein_coding|59/69|c.6419C>T|p.Thr2140Ile|6605/8230|6419/7656|2140/2551||	GT:AD:DP:GQ:PL	0/0/1:54,36:90:54:895,0,54,1486
12	120221852	.	C	G	371.64	PASS	AC=1;AF=0.333;AN=3;BaseQRankSum=0.255;ClippingRankSum=0.000;DP=82;FS=7.001;MLEAC=1;MLEAF=0.333;MQ=60.00;MQ0=0;MQRankSum=0.000;QD=4.53;ReadPosRankSum=1.052;SOR=1.561;VQSLOD=21.67;culprit=QD;ANN=G|missense_variant|MODERATE|CIT|CIT|transcript|NM_001206999.1|protein_coding|12/48|c.1405G>C|p.Glu469Gln|1461/8708|1405/6210|469/2069||	GT:AD:DP:GQ:PL	0/0/1:63,19:82:99:399,0,132,1849
12	125834650	.	A	C	506.64	PASS	AC=1;AF=0.333;AN=3;BaseQRankSum=-5.714;ClippingRankSum=0.000;DP=84;FS=2.039;MLEAC=1;MLEAF=0.333;MQ=60.00;MQ0=0;MQRankSum=0.000;QD=6.03;ReadPosRankSum=0.188;SOR=0.416;VQSLOD=21.60;culprit=QD;ANN=C|missense_variant|MODERATE|TMEM132B|TMEM132B|transcript|NM_052907.3|protein_coding|2/9|c.705A>C|p.Glu235Asp|713/10912|705/3237|235/1078||	GT:AD:DP:GQ:PL	0/0/1:58,26:84:96:534,0,96,1727
12	132262815	.	G	A	649.64	PASS	AC=1;AF=0.333;AN=3;BaseQRankSum=-0.826;ClippingRankSum=0.000;DP=91;FS=0.858;MLEAC=1;MLEAF=0.333;MQ=60.00;MQ0=0;MQRankSum=0.000;QD=7.14;ReadPosRankSum=0.126;SOR=0.558;VQSLOD=21.49;culprit=MQ;ANN=A|missense_variant|MODERATE|SFSWAP|SFSWAP|transcript|NM_001261411.1|protein_coding|14/19|c.2348G>A|p.Arg783Lys|2491/3405|2348/3012|783/1003||	GT:AD:DP:GQ:PL	0/0/1:63,28:91:99:677,0,105,1869
12	132635892	rs1132100	C	A	602.64	PASS	AC=1;AF=0.333;AN=3;BaseQRankSum=-3.646;ClippingRankSum=0.000;DB;DP=77;FS=6.228;MLEAC=1;MLEAF=0.333;MQ=60.00;MQ0=0;MQRankSum=0.000;QD=7.83;ReadPosRankSum=0.417;SOR=1.460;VQSLOD=21.83;culprit=MQ;ANN=A|missense_variant|MODERATE|NOC4L|NOC4L|transcript|NM_024078.2|protein_coding|11/15|c.1052C>A|p.Ala351Asp|1114/1685|1052/1551|351/516||	GT:AD:DP:GQ:PL	0/0/1:48,29:77:58:630,0,58,1322
13	26151235	.	C	G	492.77	PASS	AC=1;AF=0.500;AN=2;BaseQRankSum=0.814;ClippingRankSum=0.000;DP=37;ExcessHet=3.0103;FS=0.000;MLEAC=1;MLEAF=0.500;MQ=60.00;MQ0=0;MQRankSum=0.000;QD=13.32;ReadPosRankSum=0.732;SOR=0.859;VQSLOD=21.00;culprit=MQ;ANN=G|missense_variant|MODERATE|ATP8A2|ATP8A2|transcript|NM_016529.5|protein_coding|20/37|c.1741C>G|p.Arg581Gly|1943/9635|1741/3567|581/1188||	GT:AD:DP:GQ:PL	0/1:15,22:37:99:521,0,344
13	33018129	.	G	A	591.77	PASS	AC=1;AF=0.500;AN=2;BaseQRankSum=1.463;ClippingRankSum=0.000;DP=55;ExcessHet=3.0103;FS=3.721;MLEAC=1;MLEAF=0.500;MQ=60.00;MQ0=0;MQRankSum=0.000;QD=10.76;ReadPosRankSum=0.847;SOR=0.349;VQSLOD=21.54;culprit=MQ;ANN=A|missense_variant|MODERATE|N4BP2L2|N4BP2L2|transcript|NM_001320836.1|protein_coding|7/10|c.1832C>T|p.Thr611Ile|2010/4230|1832/3546|611/1181||	GT:AD:DP:GQ:PL	0/1:30,25:55:99:620,0,760
13	33110869	.	G	T	1715.77	PASS	AC=2;AF=1.00;AN=2;DP=53;ExcessHet=3.0103;FS=0.000;MLEAC=2;MLEAF=1.00;MQ=60.00;MQ0=0;QD=32.37;SOR=0.808;VQSLOD=19.38;culprit=MQ;ANN=T|stop_gained|HIGH|N4BP2L2|N4BP2L2|transcript|NM_001320836.1|protein_coding|2/10|c.296C>A|p.Ser99*|474/4230|296/3546|99/1181||;LOF=(N4BP2L2|N4BP2L2|1|1.00);NMD=(N4BP2L2|N4BP2L2|1|1.00)	GT:AD:DP:GQ:PL	1/1:0,53:53:99:1744,159,0
13	33629273	.	C	A	477.77	PASS	AC=1;AF=0.500;AN=2;BaseQRankSum=2.502;ClippingRankSum=0.000;DP=33;ExcessHet=3.0103;FS=0.000;MLEAC=1;MLEAF=0.500;MQ=60.00;MQ0=0;MQRankSum=0.000;QD=14.48;ReadPosRankSum=0.870;SOR=0.963;VQSLOD=20.78;culprit=MQ;ANN=A|missense_variant|MODERATE|KL|KL|transcript|NM_004795.3|protein_coding|3/5|c.1420C>A|p.Arg474Ser|1428/5006|1420/3039|474/1012||	GT:AD:DP:GQ:PL	0/1:15,18:33:99:506,0,344
13	35516972	.	G	T	141.77	PASS	AC=1;AF=0.500;AN=2;BaseQRankSum=-1.147;ClippingRankSum=0.000;DP=20;ExcessHet=3.0103;FS=0.000;MLEAC=1;MLEAF=0.500;MQ=60.00;MQ0=0;MQRankSum=0.000;QD=7.09;ReadPosRankSum=1.711;SOR=0.787;VQSLOD=19.76;culprit=DP;ANN=T|missense_variant|MODERATE|NBEA|NBEA|transcript|NM_015678.4|protein_coding|1/58|c.15G>T|p.Lys5Asn|549/11120|15/8841|5/2946||	GT:AD:DP:GQ:PL	0/1:11,9:20:99:170,0,253
13	42793387	.	G	T	789.77	PASS	AC=1;AF=0.500;AN=2;BaseQRankSum=-2.377;ClippingRankSum=0.000;DP=64;ExcessHet=3.0103;FS=0.922;MLEAC=1;MLEAF=0.500;MQ=60.00;MQ0=0;MQRankSum=0.000;QD=12.34;ReadPosRankSum=0.161;SOR=0.818;VQSLOD=21.75;culprit=MQ;ANN=T|stop_gained|HIGH|DGKH|DGKH|transcript|NM_178009.4|protein_coding|27/30|c.3235G>T|p.Glu1079*|3301/17438|3235/3663|1079/1220||;LOF=(DGKH|DGKH|1|1.00);NMD=(DGKH|DGKH|1|1.00)	GT:AD:DP:GQ:PL	0/1:32,32:64:99:818,0,888
14	21552058	.	G	T	46.77	PASS	AC=1;AF=0.500;AN=2;BaseQRankSum=0.868;ClippingRankSum=0.000;DP=53;ExcessHet=3.0103;FS=1.639;MLEAC=1;MLEAF=0.500;MQ=60.00;MQ0=0;MQRankSum=0.000;QD=0.88;ReadPosRankSum=0.315;SOR=1.230;VQSLOD=21.33;culprit=QD;ANN=T|missense_variant|MODERATE|ARHGEF40|ARHGEF40|transcript|NM_018071.4|protein_coding|17/24|c.3638G>T|p.Arg1213Leu|3775/5936|3638/4560|1213/1519||	GT:AD:DP:GQ:PL	0/1:46,7:53:75:75,0,1268
14	36003525	.	G	A	1743.77	PASS	AC=2;AF=1.00;AN=2;DP=40;ExcessHet=3.0103;FS=0.000;MLEAC=2;MLEAF=1.00;MQ=60.00;MQ0=0;QD=29.96;SOR=1.292;VQSLOD=19.47;culprit=MQ;ANN=A|missense_variant|MODERATE|INSM2|INSM2|transcript|NM_032594.3|protein_coding|1/1|c.67G>A|p.Glu23Lys|278/3013|67/1701|23/566||,A|downstream_gene_variant|MODIFIER|RALGAPA1|RALGAPA1|transcript|NM_001330075.1|protein_coding||c.*14212C>T|||||4033|,A|downstream_gene_varian…	GT:AD:DP:GQ:PL	1/1:0,40:40:99:1772,120,0
14	50930820	.	C	G	463.77	PASS	AC=1;AF=0.500;AN=2;BaseQRankSum=-0.909;ClippingRankSum=0.000;DP=43;ExcessHet=3.0103;FS=0.000;MLEAC=1;MLEAF=0.500;MQ=60.00;MQ0=0;MQRankSum=0.000;QD=10.79;ReadPosRankSum=0.792;SOR=0.793;VQSLOD=21.23;culprit=MQ;ANN=G|missense_variant|MODERATE|MAP4K5|MAP4K5|transcript|NM_006575.4|protein_coding|12/32|c.769G>C|p.Ala257Pro|1089/4387|769/2541|257/846||	GT:AD:DP:GQ:PL	0/1:22,21:43:99:492,0,575
14	50933320	.	G	T	898.77	PASS	AC=1;AF=0.500;AN=2;BaseQRankSum=-0.172;ClippingRankSum=0.000;DP=48;ExcessHet=3.0103;FS=1.220;MLEAC=1;MLEAF=0.500;MQ=60.00;MQ0=0;MQRankSum=0.000;QD=18.72;ReadPosRankSum=1.219;SOR=1.022;VQSLOD=21.21;culprit=MQ;ANN=T|missense_variant|MODERATE|MAP4K5|MAP4K5|transcript|NM_006575.4|protein_coding|11/32|c.718C>A|p.Leu240Ile|1038/4387|718/2541|240/846||	GT:AD:DP:GQ:PL	0/1:15,33:48:99:927,0,350
14	60585258	.	C	T	1579.77	PASS	AC=2;AF=1.00;AN=2;DP=47;ExcessHet=3.0103;FS=0.000;MLEAC=2;MLEAF=1.00;MQ=60.00;MQ0=0;QD=33.61;SOR=0.823;VQSLOD=15.64;culprit=QD;ANN=T|missense_variant|MODERATE|PCNX4|PCNX4|transcript|NM_001330177.1|protein_coding|7/11|c.1790C>T|p.Pro597Leu|2352/4674|1790/3519|597/1172||	GT:AD:DP:GQ:PL	1/1:0,47:47:99:1608,141,0
14	64886621	.	C	A	600.77	PASS	AC=1;AF=0.500;AN=2;BaseQRankSum=1.319;ClippingRankSum=0.000;DP=48;ExcessHet=3.0103;FS=6.245;MLEAC=1;MLEAF=0.500;MQ=60.00;MQ0=0;MQRankSum=0.000;QD=12.52;ReadPosRankSum=0.095;SOR=1.655;VQSLOD=21.54;culprit=MQ;ANN=A|missense_variant|MODERATE|MTHFD1|MTHFD1|transcript|NM_005956.3|protein_coding|8/28|c.705C>A|p.Asp235Glu|1092/3448|705/2808|235/935||	GT:AD:DP:GQ:PL	0/1:25,23:48:99:629,0,601
15	33895325	rs146818373	A	G	574.65	PASS	AC=1;AF=0.333;AN=3;BaseQRankSum=-1.300;ClippingRankSum=0.753;DB;DP=57;FS=1.030;MLEAC=1;MLEAF=0.333;MQ=60.00;MQ0=0;MQRankSum=0.058;QD=10.26;ReadPosRankSum=0.571;SOR=0.904;VQSLOD=13.92;culprit=MQ;ANN=G|missense_variant&splice_region_variant|MODERATE|RYR3|RYR3|transcript|NM_001036.4|protein_coding|18/104|c.1924A>G|p.Ile642Val|2008/15574|1924/14613|642/4870||	GT:AD:DP:GQ:PL	0/0/1:32,24:56:25:602,0,25,903
15	62360485	rs146097394	C	G	388.64	PASS	AC=2;AF=0.667;AN=3;BaseQRankSum=-2.798;ClippingRankSum=0.122;DB;DP=23;FS=0.000;MLEAC=2;MLEAF=0.667;MQ=60.00;MQ0=0;MQRankSum=1.014;QD=16.90;ReadPosRankSum=0.608;SOR=0.544;VQSLOD=12.28;culprit=DP;ANN=G|missense_variant|MODERATE|C2CD4A|C2CD4A|transcript|NM_207322.2|protein_coding|2/2|c.673C>G|p.Arg225Gly|814/3445|673/1110|225/369||	GT:AD:DP:GQ:PL	0/1/1:4,19:23:42:416,42,0,87
15	63631070	.	G	T	735.64	PASS	AC=1;AF=0.333;AN=3;BaseQRankSum=-1.364;ClippingRankSum=-1.245;DP=90;FS=2.886;MLEAC=1;MLEAF=0.333;MQ=60.00;MQ0=0;MQRankSum=0.502;QD=8.27;ReadPosRankSum=1.473;SOR=0.864;VQSLOD=14.29;culprit=MQ;ANN=T|missense_variant|MODERATE|CA12|CA12|transcript|NM_001218.4|protein_coding|8/11|c.822C>A|p.Phe274Leu|1212/4209|822/1065|274/354||	GT:AD:DP:GQ:PL	0/0/1:55,34:89:62:763,0,62,1449
15	69732375	.	G	A	1407.64	PASS	AC=2;AF=0.667;AN=3;BaseQRankSum=-1.005;ClippingRankSum=0.391;DP=78;FS=0.895;MLEAC=2;MLEAF=0.667;MQ=60.00;MQ0=0;MQRankSum=1.318;QD=18.05;ReadPosRankSum=1.141;SOR=0.659;VQSLOD=13.79;culprit=MQ;ANN=A|missense_variant|MODERATE|KIF23|KIF23|transcript|NM_138555.3|protein_coding|16/23|c.1846G>A|p.Gly616Ser|2066/3723|1846/2883|616/960||	GT:AD:DP:GQ:PL	0/1/1:28,50:78:66:1435,66,0,733
15	74751183	.	G	A	824.64	PASS	AC=1;AF=0.333;AN=3;BaseQRankSum=4.153;ClippingRankSum=1.021;DP=90;FS=5.629;MLEAC=1;MLEAF=0.333;MQ=60.00;MQ0=0;MQRankSum=-1.030;QD=9.16;ReadPosRankSum=0.377;SOR=0.425;VQSLOD=14.11;culprit=MQ;ANN=A|missense_variant|MODERATE|UBL7|UBL7|transcript|NM_001286741.1|protein_coding|2/11|c.146C>T|p.Ala49Val|576/1806|146/1263|49/420||,A|upstream_gene_variant|MODIFIER|UBL7-AS1|UBL7-AS1|transcript|NR_038448.1|…	GT:AD:DP:GQ:PL	0/0/1:57,33:90:71:852,0,71,1430
15	76196398	.	C	T	358.64	PASS	AC=1;AF=0.333;AN=3;BaseQRankSum=1.702;ClippingRankSum=-0.688;DP=64;FS=3.798;MLEAC=1;MLEAF=0.333;MQ=60.00;MQ0=0;MQRankSum=-0.210;QD=5.60;ReadPosRankSum=0.688;SOR=0.660;VQSLOD=13.97;culprit=QD;ANN=T|missense_variant|MODERATE|FBXO22|FBXO22|transcript|NM_147188.2|protein_coding|1/7|c.94C>T|p.Arg32Cys|199/3482|94/1212|32/403||,T|downstream_gene_variant|MODIFIER|UBE2Q2|UBE2Q2|transcript|NM_173469.3|pro…	GT:AD:DP:GQ:PL	0/0/1:44,20:64:74:386,0,74,1129
15	90611183	.	G	T	556.64	PASS	AC=1;AF=0.333;AN=3;BaseQRankSum=0.412;ClippingRankSum=0.687;DP=72;FS=0.000;MLEAC=1;MLEAF=0.333;MQ=60.00;MQ0=0;MQRankSum=0.030;QD=7.73;ReadPosRankSum=-0.042;SOR=0.770;VQSLOD=14.10;culprit=MQ;ANN=T|missense_variant|MODERATE|ZNF710|ZNF710|transcript|NM_198526.3|protein_coding|2/5|c.814G>T|p.Asp272Tyr|966/4518|814/1995|272/664||	GT:AD:DP:GQ:PL	0/0/1:48,24:72:72:584,0,72,1388
16	1910414	.	C	T	356.64	PASS	AC=1;AF=0.333;AN=3;BaseQRankSum=0.024;ClippingRankSum=0.000;DP=97;FS=3.569;MLEAC=1;MLEAF=0.333;MQ=60.00;MQ0=0;MQRankSum=0.000;QD=3.68;ReadPosRankSum=-0.365;SOR=0.758;VQSLOD=21.23;culprit=QD;ANN=T|missense_variant|MODERATE|MEIOB|MEIOB|transcript|NM_001163560.2|protein_coding|5/14|c.322G>A|p.Ala108Thr|517/1884|322/1416|108/471||	GT:AD:DP:GQ:PL	0/0/1:79,18:97:99:384,0,183,2367
16	2201591	.	G	A	454.64	PASS	AC=1;AF=0.333;AN=3;BaseQRankSum=1.116;ClippingRankSum=0.000;DP=81;FS=0.950;MLEAC=1;MLEAF=0.333;MQ=60.00;MQ0=0;MQRankSum=0.000;QD=5.61;ReadPosRankSum=-0.790;SOR=0.727;VQSLOD=21.60;culprit=QD;ANN=A|missense_variant|MODERATE|RAB26|RAB26|transcript|NM_014353.4|protein_coding|3/9|c.328G>A|p.Gly110Ser|462/1624|328/771|110/256||,A|upstream_gene_variant|MODIFIER|TRAF7|TRAF7|transcript|NM_032271.2|protein…	GT:AD:DP:GQ:PL	0/0/1:60,21:81:99:482,0,117,1747
16	3274483	.	G	C	318.64	PASS	AC=1;AF=0.333;AN=3;BaseQRankSum=4.082;ClippingRankSum=0.000;DP=77;FS=2.712;MLEAC=1;MLEAF=0.333;MQ=60.00;MQ0=0;MQRankSum=0.000;QD=4.14;ReadPosRankSum=-0.458;SOR=0.310;VQSLOD=21.62;culprit=QD;ANN=C|missense_variant|MODERATE|ZNF200|ZNF200|transcript|NM_003454.3|protein_coding|5/5|c.597C>G|p.Asn199Lys|1229/3387|597/1188|199/395||	GT:AD:DP:GQ:PL	0/0/1:62,15:77:99:346,0,138,1732
16	4861709	rs2085329	G	C	3050.64	PASS	AC=3;AF=1.00;AN=3;DB;DP=95;FS=0.000;MLEAC=3;MLEAF=1.00;MQ=60.00;MQ0=0;POSITIVE_TRAIN_SITE;QD=32.11;SOR=0.999;VQSLOD=20.73;culprit=MQ;ANN=C|missense_variant|MODERATE|GLYR1|GLYR1|transcript|NM_001324098.1|protein_coding|13/15|c.1392C>G|p.His464Gln|1449/3767|1392/1677|464/558||	GT:AD:DP:GQ:PL	1/1/1:0,95:95:99:3078,448,166,0
16	4977213	.	T	G	668.64	PASS	AC=1;AF=0.333;AN=3;BaseQRankSum=1.703;ClippingRankSum=0.000;DP=78;FS=8.108;MLEAC=1;MLEAF=0.333;MQ=60.00;MQ0=0;MQRankSum=0.000;QD=9.04;ReadPosRankSum=0.205;SOR=1.511;VQSLOD=21.93;culprit=MQ;ANN=G|sequence_feature|MODERATE|PPL|PPL|modified-residue:phosphoserine|NM_002705.4|protein_coding||c.62+9772A>C||||||,G|intron_variant|MODIFIER|PPL|PPL|transcript|NM_002705.4|protein_coding|1/21|c.62+9772A>C|||…	GT:AD:DP:GQ:PL	0/0/1:47,27:74:59:696,0,59,1279
16	20809114	.	T	A	1263.64	PASS	AC=2;AF=0.667;AN=3;BaseQRankSum=0.797;ClippingRankSum=0.000;DP=79;FS=0.879;MLEAC=2;MLEAF=0.667;MQ=60.00;MQ0=0;MQRankSum=0.000;QD=16.20;ReadPosRankSum=-2.138;SOR=0.521;VQSLOD=21.32;culprit=ReadPosRankSum;ANN=A|missense_variant|MODERATE|ERI2|ERI2|transcript|NM_001142725.1|protein_coding|9/9|c.2008A>T|p.Ile670Phe|2051/3503|2008/2076|670/691||,A|downstream_gene_variant|MODIFIER|ACSM3|ACSM3|transcript…	GT:AD:DP:GQ:PL	0/1/1:32,46:78:43:1291,43,0,799
16	31289311	.	C	T	1899.64	PASS	AC=2;AF=0.667;AN=3;BaseQRankSum=3.930;ClippingRankSum=0.000;DP=90;FS=0.905;MLEAC=2;MLEAF=0.667;MQ=60.00;MQ0=0;MQRankSum=0.000;QD=21.11;ReadPosRankSum=2.711;SOR=0.620;VQSLOD=20.63;culprit=ReadPosRankSum;ANN=T|missense_variant|MODERATE|ITGAM|ITGAM|transcript|NM_001145808.1|protein_coding|12/30|c.1237C>T|p.Arg413Trp|1335/4745|1237/3462|413/1153||	GT:AD:DP:GQ:PL	0/1/1:24,66:90:99:1927,125,0,514
16	58742130	.	A	C	735.64	PASS	AC=1;AF=0.333;AN=3;BaseQRankSum=2.301;ClippingRankSum=0.000;DP=76;FS=1.954;MLEAC=1;MLEAF=0.333;MQ=60.00;MQ0=0;MQRankSum=0.000;QD=9.81;ReadPosRankSum=1.325;SOR=0.444;VQSLOD=21.57;culprit=MQ;ANN=C|missense_variant|MODERATE|GOT2|GOT2|transcript|NM_002080.3|protein_coding|10/10|c.1238T>G|p.Val413Gly|1367/2462|1238/1293|413/430||	GT:AD:DP:GQ:PL	0/0/1:44,31:75:37:763,0,37,1059
16	67686924	.	G	A	51.4	PASS	AC=1;AF=0.333;AN=3;BaseQRankSum=-2.057;ClippingRankSum=0.000;DP=9;FS=0.000;MLEAC=1;MLEAF=0.333;MQ=60.00;MQ0=0;MQRankSum=0.000;QD=5.71;ReadPosRankSum=-0.967;SOR=0.446;VQSLOD=19.03;culprit=DP;ANN=A|missense_variant&splice_region_variant|MODERATE|CARMIL2|CARMIL2|transcript|NM_001013838.1|protein_coding|29/38|c.2887G>A|p.Ala963Thr|3007/4479|2887/4308|963/1435||,A|downstream_gene_variant|MODIFIER|ACD|…	GT:AD:DP:GQ:PL	0/0/1:5,4:9:3:77,0,3,134
16	72829032	.	G	A	329.64	PASS	AC=1;AF=0.333;AN=3;BaseQRankSum=-2.256;ClippingRankSum=0.000;DP=58;FS=2.585;MLEAC=1;MLEAF=0.333;MQ=60.00;MQ0=0;MQRankSum=0.000;QD=5.68;ReadPosRankSum=-0.388;SOR=0.365;VQSLOD=21.56;culprit=QD;ANN=A|missense_variant|MODERATE|ZFHX3|ZFHX3|transcript|NM_006885.3|protein_coding|9/10|c.7549C>T|p.Pro2517Ser|8222/16062|7549/11112|2517/3703||	GT:AD:DP:GQ:PL	0/0/1:41,17:58:73:357,0,73,1164
16	85815144	.	C	G	423.64	PASS	AC=1;AF=0.333;AN=3;BaseQRankSum=-1.607;ClippingRankSum=0.000;DP=48;FS=2.508;MLEAC=1;MLEAF=0.333;MQ=60.00;MQ0=0;MQRankSum=0.000;QD=8.83;ReadPosRankSum=-0.485;SOR=0.394;VQSLOD=21.36;culprit=MQ;ANN=G|sequence_feature|MODERATE|EMC8|EMC8|modified-residue:phosphoserine|NM_006067.4|protein_coding||c.309-258G>C||||||,G|intron_variant|MODIFIER|EMC8|EMC8|transcript|NM_006067.4|protein_coding|2/4|c.309-258G…	GT:AD:DP:GQ:PL	0/0/1:29,19:48:30:451,0,30,809
17	4462668	.	C	G	50.77	PASS	AC=1;AF=0.500;AN=2;BaseQRankSum=-0.422;ClippingRankSum=0.000;DP=66;ExcessHet=3.0103;FS=0.000;MLEAC=1;MLEAF=0.500;MQ=60.00;MQ0=0;MQRankSum=0.000;QD=0.77;ReadPosRankSum=-1.399;SOR=0.777;VQSLOD=21.41;culprit=QD;ANN=G|missense_variant|MODERATE|GGT6|GGT6|transcript|NM_001288702.1|protein_coding|3/4|c.427G>C|p.Ala143Pro|502/2663|427/1500|143/499||,G|upstream_gene_variant|MODIFIER|MYBBP1A|MYBBP1A|transc…	GT:AD:DP:GQ:PL	0/1:57,9:66:79:79,0,1630
17	5086818	.	C	A	854.77	PASS	AC=1;AF=0.500;AN=2;BaseQRankSum=0.272;ClippingRankSum=0.000;DP=58;ExcessHet=3.0103;FS=2.250;MLEAC=1;MLEAF=0.500;MQ=60.00;MQ0=0;MQRankSum=0.000;QD=14.74;ReadPosRankSum=0.264;SOR=1.085;VQSLOD=21.63;culprit=MQ;ANN=A|missense_variant|MODERATE|ZNF594|ZNF594|transcript|NM_032530.1|protein_coding|2/2|c.734G>T|p.Gly245Val|890/4877|734/2424|245/807||	GT:AD:DP:GQ:PL	0/1:26,32:58:99:883,0,670
17	6012940	.	C	A	469.77	PASS	AC=1;AF=0.500;AN=2;BaseQRankSum=-0.836;ClippingRankSum=0.000;DP=59;ExcessHet=3.0103;FS=2.300;MLEAC=1;MLEAF=0.500;MQ=60.00;MQ0=0;MQRankSum=0.000;QD=7.96;ReadPosRankSum=0.580;SOR=0.782;VQSLOD=21.60;culprit=MQ;ANN=A|missense_variant|MODERATE|WSCD1|WSCD1|transcript|NM_015253.1|protein_coding|6/9|c.863C>A|p.Ala288Asp|1190/5821|863/1728|288/575||	GT:AD:DP:GQ:PL	0/1:39,20:59:99:498,0,1119
17	10210313	.	C	G	491.77	PASS	AC=1;AF=0.500;AN=2;BaseQRankSum=-2.319;ClippingRankSum=0.000;DP=45;ExcessHet=3.0103;FS=14.411;MLEAC=1;MLEAF=0.500;MQ=60.00;MQ0=0;MQRankSum=0.000;QD=10.93;ReadPosRankSum=0.099;SOR=1.725;VQSLOD=20.11;culprit=FS;ANN=G|missense_variant|MODERATE|MYH13|MYH13|transcript|NM_003802.2|protein_coding|36/41|c.5238G>C|p.Glu1746Asp|5328/5992|5238/5817|1746/1938||	GT:AD:DP:GQ:PL	0/1:24,21:45:99:520,0,659
17	11166724	.	T	C	1032.77	PASS	AC=2;AF=1.00;AN=2;DP=33;ExcessHet=3.0103;FS=0.000;MLEAC=2;MLEAF=1.00;MQ=60.00;MQ0=0;QD=31.30;SOR=1.179;VQSLOD=20.04;culprit=MQ;ANN=C|missense_variant|MODERATE|SHISA6|SHISA6|transcript|NM_207386.3|protein_coding|2/6|c.680T>C|p.Ile227Thr|680/7415|680/1656|227/551||	GT:AD:DP:GQ:PL	1/1:0,33:33:99:1061,99,0
17	21201884	rs2305875	T	C	1876.77	PASS	AC=1;AF=0.500;AN=2;BaseQRankSum=-5.726;ClippingRankSum=0.000;DB;DP=93;ExcessHet=3.0103;FS=0.000;MLEAC=1;MLEAF=0.500;MQ=60.00;MQ0=0;MQRankSum=0.000;QD=20.18;ReadPosRankSum=0.043;SOR=0.732;VQSLOD=21.36;culprit=MQ;ANN=C|sequence_feature|MODERATE|MAP2K3|MAP2K3|modified-residue:phosphothreonine|NM_145109.2|protein_coding||c.116+93T>C||||||,C|intron_variant|MODIFIER|MAP2K3|MAP2K3|transcript|NM_145109.2…	GT:AD:DP:GQ:PL	0/1:46,47:93:99:1905,0,2294
17	21201890	rs8072401	A	G	1974.77	PASS	AC=1;AF=0.500;AN=2;BaseQRankSum=1.329;ClippingRankSum=0.000;DB;DP=95;ExcessHet=3.0103;FS=0.766;MLEAC=1;MLEAF=0.500;MQ=60.00;MQ0=0;MQRankSum=0.000;QD=20.79;ReadPosRankSum=-0.650;SOR=0.794;VQSLOD=21.22;culprit=MQ;ANN=G|sequence_feature|MODERATE|MAP2K3|MAP2K3|modified-residue:phosphothreonine|NM_145109.2|protein_coding||c.116+99A>G||||||,G|intron_variant|MODIFIER|MAP2K3|MAP2K3|transcript|NM_145109.2…	GT:AD:DP:GQ:PL	0/1:45,50:95:99:2003,0,2323
17	21201907	rs2305874	G	A	1901.77	PASS	AC=1;AF=0.500;AN=2;BaseQRankSum=-2.170;ClippingRankSum=0.000;DB;DP=95;ExcessHet=3.0103;FS=2.776;MLEAC=1;MLEAF=0.500;MQ=60.00;MQ0=0;MQRankSum=0.000;QD=20.02;ReadPosRankSum=-0.653;SOR=1.063;VQSLOD=21.23;culprit=MQ;ANN=A|sequence_feature|MODERATE|MAP2K3|MAP2K3|modified-residue:phosphothreonine|NM_145109.2|protein_coding||c.116+116G>A||||||,A|intron_variant|MODIFIER|MAP2K3|MAP2K3|transcript|NM_145109…	GT:AD:DP:GQ:PL	0/1:44,51:95:99:1930,0,2237
17	21202056	rs34676150	G	A	1601.77	PASS	AC=1;AF=0.500;AN=2;BaseQRankSum=-1.416;ClippingRankSum=0.000;DB;DP=87;ExcessHet=3.0103;FS=4.058;MLEAC=1;MLEAF=0.500;MQ=60.00;MQ0=0;MQRankSum=0.000;QD=18.41;ReadPosRankSum=-0.268;SOR=0.998;VQSLOD=21.56;culprit=MQ;ANN=A|sequence_feature|MODERATE|MAP2K3|MAP2K3|modified-residue:phosphothreonine|NM_145109.2|protein_coding||c.117-134G>A||||||,A|intron_variant|MODIFIER|MAP2K3|MAP2K3|transcript|NM_145109…	GT:AD:DP:GQ:PL	0/1:44,43:87:99:1630,0,2225
17	21202063	rs77850849	G	C	1592.77	PASS	AC=1;AF=0.500;AN=2;BaseQRankSum=0.150;ClippingRankSum=0.000;DB;DP=84;ExcessHet=3.0103;FS=4.115;MLEAC=1;MLEAF=0.500;MQ=60.00;MQ0=0;MQRankSum=0.000;QD=18.96;ReadPosRankSum=0.402;SOR=1.151;VQSLOD=21.59;culprit=MQ;ANN=C|sequence_feature|MODERATE|MAP2K3|MAP2K3|modified-residue:phosphothreonine|NM_145109.2|protein_coding||c.117-127G>C||||||,C|intron_variant|MODIFIER|MAP2K3|MAP2K3|transcript|NM_145109.2…	GT:AD:DP:GQ:PL	0/1:44,40:84:99:1621,0,2292
17	21202067	rs76764437	A	G	1592.77	PASS	AC=1;AF=0.500;AN=2;BaseQRankSum=-0.153;ClippingRankSum=0.000;DB;DP=87;ExcessHet=3.0103;FS=2.848;MLEAC=1;MLEAF=0.500;MQ=60.00;MQ0=0;MQRankSum=0.000;QD=18.31;ReadPosRankSum=0.172;SOR=1.070;VQSLOD=21.52;culprit=MQ;ANN=G|sequence_feature|MODERATE|MAP2K3|MAP2K3|modified-residue:phosphothreonine|NM_145109.2|protein_coding||c.117-123A>G||||||,G|intron_variant|MODIFIER|MAP2K3|MAP2K3|transcript|NM_145109.…	GT:AD:DP:GQ:PL	0/1:45,42:87:99:1621,0,2292
17	21202078	rs35477472	G	A	1696.77	PASS	AC=1;AF=0.500;AN=2;BaseQRankSum=0.936;ClippingRankSum=0.000;DB;DP=85;ExcessHet=3.0103;FS=2.881;MLEAC=1;MLEAF=0.500;MQ=60.00;MQ0=0;MQRankSum=0.000;QD=19.96;ReadPosRankSum=-0.351;SOR=1.056;VQSLOD=21.52;culprit=MQ;ANN=A|sequence_feature|MODERATE|MAP2K3|MAP2K3|modified-residue:phosphothreonine|NM_145109.2|protein_coding||c.117-112G>A||||||,A|intron_variant|MODIFIER|MAP2K3|MAP2K3|transcript|NM_145109.…	GT:AD:DP:GQ:PL	0/1:42,43:85:99:1725,0,2103
17	21203893	rs34105301	T	C	1214.77	PASS	AC=1;AF=0.500;AN=2;BaseQRankSum=1.998;ClippingRankSum=0.000;DB;DP=95;ExcessHet=3.0103;FS=0.000;MLEAC=1;MLEAF=0.500;MQ=60.00;MQ0=0;MQRankSum=0.000;QD=12.79;ReadPosRankSum=1.059;SOR=0.764;VQSLOD=21.30;culprit=MQ;ANN=C|missense_variant|MODERATE|MAP2K3|MAP2K3|transcript|NM_145109.2|protein_coding|4/12|c.202T>C|p.Ser68Pro|467/2318|202/1044|68/347||	GT:AD:DP:GQ:PL	0/1:50,45:95:99:1243,0,1290
17	21204187	rs56067280	G	T	2165.77	PASS	AC=1;AF=0.500;AN=2;BaseQRankSum=1.970;ClippingRankSum=0.000;DB;DP=100;ExcessHet=3.0103;FS=2.756;MLEAC=1;MLEAF=0.500;MQ=60.00;MQ0=0;MQRankSum=0.000;QD=21.66;ReadPosRankSum=-1.084;SOR=0.466;VQSLOD=20.94;culprit=MQ;ANN=T|missense_variant&splice_region_variant|MODERATE|MAP2K3|MAP2K3|transcript|NM_145109.2|protein_coding|5/12|c.281G>T|p.Arg94Leu|546/2318|281/1044|94/347||	GT:AD:DP:GQ:PL	0/1:44,56:100:99:2194,0,1682
17	21204192	rs56216806	C	T	2215.77	PASS	AC=1;AF=0.500;AN=2;BaseQRankSum=3.697;ClippingRankSum=0.000;DB;DP=102;ExcessHet=3.0103;FS=2.751;MLEAC=1;MLEAF=0.500;MQ=60.00;MQ0=0;MQRankSum=0.000;QD=21.72;ReadPosRankSum=-1.042;SOR=0.463;VQSLOD=20.87;culprit=MQ;ANN=T|missense_variant|MODERATE|MAP2K3|MAP2K3|transcript|NM_145109.2|protein_coding|5/12|c.286C>T|p.Arg96Trp|551/2318|286/1044|96/347||	GT:AD:DP:GQ:PL	0/1:45,57:102:99:2244,0,1676
17	21204210	rs55796947	C	T	1329.77	PASS	AC=1;AF=0.500;AN=2;BaseQRankSum=1.014;ClippingRankSum=0.000;DB;DP=99;ExcessHet=3.0103;FS=0.000;MLEAC=1;MLEAF=0.500;MQ=60.00;MQ0=0;MQRankSum=0.000;QD=13.43;ReadPosRankSum=-0.140;SOR=0.641;VQSLOD=21.28;culprit=MQ;ANN=T|stop_gained|HIGH|MAP2K3|MAP2K3|transcript|NM_145109.2|protein_coding|5/12|c.304C>T|p.Gln102*|569/2318|304/1044|102/347||;LOF=(MAP2K3|MAP2K3|1|1.00);NMD=(MAP2K3|MAP2K3|1|1.00)	GT:AD:DP:GQ:PL	0/1:46,53:99:99:1358,0,1159
17	21215557	rs35206134	G	A	1812.77	PASS	AC=1;AF=0.500;AN=2;BaseQRankSum=5.247;ClippingRankSum=0.000;DB;DP=87;ExcessHet=3.0103;FS=0.806;MLEAC=1;MLEAF=0.500;MQ=60.00;MQ0=0;MQRankSum=0.000;QD=20.84;ReadPosRankSum=-0.372;SOR=0.648;VQSLOD=21.47;culprit=MQ;ANN=A|missense_variant|MODERATE|MAP2K3|MAP2K3|transcript|NM_145109.2|protein_coding|10/12|c.878G>A|p.Arg293His|1143/2318|878/1044|293/347||	GT:AD:DP:GQ:PL	0/1:40,47:87:99:1841,0,1859
17	21217513	rs2363198	G	A	1090.77	PASS	AC=1;AF=0.500;AN=2;BaseQRankSum=4.238;ClippingRankSum=0.000;DB;DP=101;ExcessHet=3.0103;FS=18.117;MLEAC=1;MLEAF=0.500;MQ=60.00;MQ0=0;MQRankSum=0.000;QD=10.91;ReadPosRankSum=-0.022;SOR=1.077;VQSLOD=18.74;culprit=FS;ANN=A|missense_variant|MODERATE|MAP2K3|MAP2K3|transcript|NM_145109.2|protein_coding|12/12|c.1015G>A|p.Val339Met|1280/2318|1015/1044|339/347||	GT:AD:DP:GQ:PL	0/1:55,45:100:99:1119,0,1323
17	21318698	rs1657738	C	T	1267.77	PASS	AC=1;AF=0.500;AN=2;BaseQRankSum=3.682;ClippingRankSum=0.000;DB;DP=159;ExcessHet=3.0103;FS=16.941;MLEAC=1;MLEAF=0.500;MQ=60.00;MQ0=0;MQRankSum=0.000;QD=7.97;ReadPosRankSum=1.465;SOR=1.081;VQSLOD=14.82;culprit=DP;ANN=T|missense_variant|MODERATE|KCNJ12|KCNJ12|transcript|NM_021012.4|protein_coding|3/3|c.44C>T|p.Ser15Leu|749/5230|44/1302|15/433||,T|missense_variant|MODERATE|KCNJ18|KCNJ18|transcript|NM…	GT:AD:DP:GQ:PL	0/1:102,57:159:99:1296,0,2498
17	21318782	rs78117732	G	A	1177.77	PASS	AC=1;AF=0.500;AN=2;BaseQRankSum=1.963;ClippingRankSum=0.000;DB;DP=171;ExcessHet=3.0103;FS=0.617;MLEAC=1;MLEAF=0.500;MQ=60.00;MQ0=0;MQRankSum=0.000;QD=6.93;ReadPosRankSum=0.648;SOR=0.593;VQSLOD=14.99;culprit=DP;ANN=A|missense_variant|MODERATE|KCNJ12|KCNJ12|transcript|NM_021012.4|protein_coding|3/3|c.128G>A|p.Arg43His|833/5230|128/1302|43/433||,A|missense_variant|MODERATE|KCNJ18|KCNJ18|transcript|N…	GT:AD:DP:GQ:PL	0/1:117,53:170:99:1206,0,3848
17	21318867	rs73979893	G	A	279.77	PASS	AC=1;AF=0.500;AN=2;BaseQRankSum=0.125;ClippingRankSum=0.000;DB;DP=136;ExcessHet=3.0103;FS=0.000;MLEAC=1;MLEAF=0.500;MQ=60.00;MQ0=0;MQRankSum=0.000;QD=2.07;ReadPosRankSum=-2.208;SOR=0.703;VQSLOD=18.46;culprit=DP;ANN=A|missense_variant|MODERATE|KCNJ12|KCNJ12|transcript|NM_021012.4|protein_coding|3/3|c.213G>A|p.Met71Ile|918/5230|213/1302|71/433||,A|missense_variant|MODERATE|KCNJ18|KCNJ18|transcript|…	GT:AD:DP:GQ:PL	0/1:113,22:135:99:308,0,3698
17	21319069	rs76265595	G	A	1492.77	PASS	AC=1;AF=0.500;AN=2;BaseQRankSum=4.579;ClippingRankSum=0.000;DB;DP=152;ExcessHet=3.0103;FS=2.259;MLEAC=1;MLEAF=0.500;MQ=60.00;MQ0=0;MQRankSum=0.000;QD=9.82;ReadPosRankSum=-1.225;SOR=0.915;VQSLOD=17.22;culprit=DP;ANN=A|missense_variant|MODERATE|KCNJ12|KCNJ12|transcript|NM_021012.4|protein_coding|3/3|c.415G>A|p.Glu139Lys|1120/5230|415/1302|139/433||,A|missense_variant|MODERATE|KCNJ18|KCNJ18|transcri…	GT:AD:DP:GQ:PL	0/1:107,45:152:99:1521,0,5145
17	21319079	rs76518282	C	A	1732.77	PASS	AC=1;AF=0.500;AN=2;BaseQRankSum=1.244;ClippingRankSum=0.000;DB;DP=154;ExcessHet=3.0103;FS=7.854;MLEAC=1;MLEAF=0.500;MQ=60.00;MQ0=0;MQRankSum=0.000;QD=11.25;ReadPosRankSum=-2.112;SOR=1.115;VQSLOD=17.13;culprit=DP;ANN=A|missense_variant|MODERATE|KCNJ12|KCNJ12|transcript|NM_021012.4|protein_coding|3/3|c.425C>A|p.Thr142Asn|1130/5230|425/1302|142/433||,A|missense_variant|MODERATE|KCNJ18|KCNJ18|transcr…	GT:AD:DP:GQ:PL	0/1:106,48:154:99:1761,0,5428
17	21319121	rs1714864	C	T	1250.77	PASS	AC=1;AF=0.500;AN=2;BaseQRankSum=4.900;ClippingRankSum=0.000;DB;DP=152;ExcessHet=3.0103;FS=4.009;MLEAC=1;MLEAF=0.500;MQ=60.00;MQ0=0;MQRankSum=0.000;QD=8.28;ReadPosRankSum=-0.425;SOR=1.038;VQSLOD=17.38;culprit=DP;ANN=T|missense_variant|MODERATE|KCNJ12|KCNJ12|transcript|NM_021012.4|protein_coding|3/3|c.467C>T|p.Pro156Leu|1172/5230|467/1302|156/433||,T|missense_variant|MODERATE|KCNJ18|KCNJ18|transcri…	GT:AD:DP:GQ:PL	0/1:97,54:151:99:1279,0,3064
17	21319171	rs73313922	G	A	1122.77	PASS	AC=1;AF=0.500;AN=2;BaseQRankSum=5.252;ClippingRankSum=0.000;DB;DP=150;ExcessHet=3.0103;FS=0.638;MLEAC=1;MLEAF=0.500;MQ=60.00;MQ0=0;MQRankSum=0.000;QD=7.49;ReadPosRankSum=-1.060;SOR=0.676;VQSLOD=17.49;culprit=DP;ANN=A|missense_variant|MODERATE|KCNJ12|KCNJ12|transcript|NM_021012.4|protein_coding|3/3|c.517G>A|p.Asp173Asn|1222/5230|517/1302|173/433||,A|missense_variant|MODERATE|KCNJ18|KCNJ18|transcri…	GT:AD:DP:GQ:PL	0/1:99,51:150:99:1151,0,2285
17	21319208	rs73979896	C	T	1101.77	PASS	AC=1;AF=0.500;AN=2;BaseQRankSum=-0.323;ClippingRankSum=0.000;DB;DP=159;ExcessHet=3.0103;FS=5.082;MLEAC=1;MLEAF=0.500;MQ=60.00;MQ0=0;MQRankSum=0.000;QD=6.97;ReadPosRankSum=0.478;SOR=0.628;VQSLOD=16.62;culprit=DP;ANN=T|missense_variant|MODERATE|KCNJ12|KCNJ12|transcript|NM_021012.4|protein_coding|3/3|c.554C>T|p.Ala185Val|1259/5230|554/1302|185/433||,T|missense_variant|MODERATE|KCNJ18|KCNJ18|transcri…	GT:AD:DP:GQ:PL	0/1:107,51:158:99:1130,0,3588
17	21319230	rs1657742	G	C	1546.77	PASS	AC=1;AF=0.500;AN=2;BaseQRankSum=-1.143;ClippingRankSum=0.000;DB;DP=157;ExcessHet=3.0103;FS=5.040;MLEAC=1;MLEAF=0.500;MQ=60.00;MQ0=0;MQRankSum=0.000;QD=9.85;ReadPosRankSum=-0.527;SOR=0.957;VQSLOD=16.87;culprit=DP;ANN=C|missense_variant|MODERATE|KCNJ12|KCNJ12|transcript|NM_021012.4|protein_coding|3/3|c.576G>C|p.Gln192His|1281/5230|576/1302|192/433||,C|missense_variant|MODERATE|KCNJ18|KCNJ18|transcr…	GT:AD:DP:GQ:PL	0/1:103,54:157:99:1575,0,3483
17	21319285	rs72846667	C	T	1730.77	PASS	AC=1;AF=0.500;AN=2;BaseQRankSum=1.264;ClippingRankSum=0.000;DB;DP=148;ExcessHet=3.0103;FS=14.802;MLEAC=1;MLEAF=0.500;MQ=60.00;MQ0=0;MQRankSum=0.000;QD=11.69;ReadPosRankSum=-0.381;SOR=0.582;VQSLOD=17.11;culprit=DP;ANN=T|missense_variant|MODERATE|KCNJ12|KCNJ12|transcript|NM_021012.4|protein_coding|3/3|c.631C>T|p.Leu211Phe|1336/5230|631/1302|211/433||,T|missense_variant|MODERATE|KCNJ18|KCNJ18|transc…	GT:AD:DP:GQ:PL	0/1:99,49:148:99:1759,0,4177
17	21319369	rs77048459	G	A	1713.77	PASS	AC=1;AF=0.500;AN=2;BaseQRankSum=4.168;ClippingRankSum=0.000;DB;DP=148;ExcessHet=3.0103;FS=2.205;MLEAC=1;MLEAF=0.500;MQ=60.00;MQ0=0;MQRankSum=0.000;QD=11.58;ReadPosRankSum=-1.188;SOR=0.513;VQSLOD=17.65;culprit=DP;ANN=A|missense_variant|MODERATE|KCNJ12|KCNJ12|transcript|NM_021012.4|protein_coding|3/3|c.715G>A|p.Glu239Lys|1420/5230|715/1302|239/433||,A|missense_variant|MODERATE|KCNJ18|KCNJ18|transcr…	GT:AD:DP:GQ:PL	0/1:97,51:148:99:1742,0,3835
17	21319943	rs5021699	A	G	1111.77	PASS	AC=1;AF=0.500;AN=2;BaseQRankSum=2.096;ClippingRankSum=0.000;DB;DP=132;ExcessHet=3.0103;FS=9.994;MLEAC=1;MLEAF=0.500;MQ=60.00;MQ0=0;MQRankSum=0.000;QD=8.49;ReadPosRankSum=1.279;SOR=1.334;VQSLOD=19.40;culprit=DP;ANN=G|missense_variant|MODERATE|KCNJ12|KCNJ12|transcript|NM_021012.4|protein_coding|3/3|c.1289A>G|p.Glu430Gly|1994/5230|1289/1302|430/433||,G|missense_variant|MODERATE|KCNJ18|KCNJ18|transcr…	GT:AD:DP:GQ:PL	0/1:84,47:131:99:1140,0,2886
17	37634227	.	G	C	1101.64	PASS	AC=2;AF=0.667;AN=3;BaseQRankSum=-3.884;ClippingRankSum=0.000;DP=56;FS=4.464;MLEAC=2;MLEAF=0.667;MQ=60.00;MQ0=0;MQRankSum=0.000;QD=19.67;ReadPosRankSum=-1.242;SOR=0.283;VQSLOD=21.47;culprit=MQ;ANN=C|sequence_feature|MODERATE|CDK12|CDK12|modified-residue:phosphoserine|NM_016507.3|protein_coding||c.1931+6211G>C||||||,C|intron_variant|MODIFIER|CDK12|CDK12|transcript|NM_016507.3|protein_coding|2/13|c.…	GT:AD:DP:GQ:PL	0/1/1:13,43:56:89:1129,89,0,309
17	41738482	.	C	A	315.64	PASS	AC=1;AF=0.333;AN=3;BaseQRankSum=-0.828;ClippingRankSum=0.000;DP=69;FS=4.222;MLEAC=1;MLEAF=0.333;MQ=60.00;MQ0=0;MQRankSum=0.000;QD=4.64;ReadPosRankSum=-0.018;SOR=0.258;VQSLOD=21.70;culprit=QD;ANN=A|missense_variant|MODERATE|MEOX1|MEOX1|transcript|NM_004527.3|protein_coding|1/3|c.421G>T|p.Ala141Ser|450/2314|421/765|141/254||	GT:AD:DP:GQ:PL	0/0/1:52,16:68:99:343,0,106,1449
17	48603425	.	C	A	328.64	PASS	AC=1;AF=0.333;AN=3;BaseQRankSum=-0.022;ClippingRankSum=0.000;DP=69;FS=0.000;MLEAC=1;MLEAF=0.333;MQ=60.00;MQ0=0;MQRankSum=0.000;QD=4.83;ReadPosRankSum=-0.076;SOR=0.663;VQSLOD=21.74;culprit=QD;ANN=A|missense_variant|MODERATE|MYCBPAP|MYCBPAP|transcript|NM_032133.4|protein_coding|14/19|c.2095C>A|p.Gln699Lys|2257/3190|2095/2955|699/984||	GT:AD:DP:GQ:PL	0/0/1:50,18:68:98:356,0,98,1463
17	56389688	.	G	A	1040.65	PASS	AC=2;AF=0.667;AN=3;BaseQRankSum=2.959;ClippingRankSum=0.000;DP=72;FS=3.177;MLEAC=2;MLEAF=0.667;MQ=60.00;MQ0=0;MQRankSum=0.000;QD=14.45;ReadPosRankSum=-0.695;SOR=0.399;VQSLOD=21.73;culprit=MQ;ANN=A|stop_gained|HIGH|TSPOAP1|TSPOAP1|transcript|NM_004758.3|protein_coding|17/32|c.2494C>T|p.Arg832*|3365/7698|2494/5574|832/1857||;LOF=(TSPOAP1|TSPOAP1|1|1.00);NMD=(TSPOAP1|TSPOAP1|1|1.00)	GT:AD:DP:GQ:PL	0/1/1:32,40:72:26:1068,26,0,662
17	58035769	.	G	C	661.64	PASS	AC=1;AF=0.333;AN=3;BaseQRankSum=-2.471;ClippingRankSum=0.000;DP=92;FS=0.000;MLEAC=1;MLEAF=0.333;MQ=60.00;MQ0=0;MQRankSum=0.000;QD=7.19;ReadPosRankSum=-0.626;SOR=0.758;VQSLOD=21.47;culprit=MQ;ANN=C|missense_variant|MODERATE|RNFT1|RNFT1|transcript|NM_016125.3|protein_coding|5/9|c.729C>G|p.Ser243Arg|822/2016|729/1308|243/435||,C|downstream_gene_variant|MODIFIER|TBC1D3P1-DHX40P1|TBC1D3P1-DHX40P1|tran…	GT:AD:DP:GQ:PL	0/0/1:62,30:92:94:689,0,94,1753
17	73601963	.	G	A	428.64	PASS	AC=1;AF=0.333;AN=3;BaseQRankSum=-0.997;ClippingRankSum=0.000;DP=77;FS=5.245;MLEAC=1;MLEAF=0.333;MQ=60.00;MQ0=0;MQRankSum=0.000;QD=5.57;ReadPosRankSum=-1.661;SOR=0.996;VQSLOD=21.50;culprit=QD;ANN=A|missense_variant|MODERATE|MYO15B|MYO15B|transcript|NM_001309242.1|protein_coding|20/63|c.4039G>A|p.Gly1347Ser|4039/9537|4039/9174|1347/3057||	GT:AD:DP:GQ:PL	0/0/1:57,20:77:99:456,0,110,1680
17	73739929	.	C	T	535.64	PASS	AC=1;AF=0.333;AN=3;BaseQRankSum=1.737;ClippingRankSum=0.000;DP=79;FS=4.844;MLEAC=1;MLEAF=0.333;MQ=60.00;MQ0=0;MQRankSum=0.000;QD=6.87;ReadPosRankSum=-2.288;SOR=0.613;VQSLOD=21.26;culprit=ReadPosRankSum;ANN=T|structural_interaction_variant|HIGH|ITGB4|ITGB4|interaction|3FQ4:A_1033-A_1077:NM_000213.4|protein_coding|26/40|c.3098C>T||||||,T|structural_interaction_variant|HIGH|ITGB4|ITGB4|interaction|3…	GT:AD:DP:GQ:PL	0/0/1:54,24:78:86:563,0,86,1340
17	74136151	.	G	T	241.64	PASS	AC=1;AF=0.333;AN=3;BaseQRankSum=-0.318;ClippingRankSum=0.000;DP=39;FS=0.000;MLEAC=1;MLEAF=0.333;MQ=60.00;MQ0=0;MQRankSum=0.000;QD=6.20;ReadPosRankSum=-1.036;SOR=0.859;VQSLOD=20.96;culprit=QD;ANN=T|missense_variant|MODERATE|FOXJ1|FOXJ1|transcript|NM_001454.3|protein_coding|2/3|c.326C>A|p.Pro109His|681/2640|326/1266|109/421||,T|upstream_gene_variant|MODIFIER|RNF157-AS1|RNF157-AS1|transcript|NR_0400…	GT:AD:DP:GQ:PL	0/0/1:28,11:39:50:269,0,50,786
17	79662030	.	C	G	619.64	PASS	AC=1;AF=0.333;AN=3;BaseQRankSum=-2.633;ClippingRankSum=0.000;DP=82;FS=0.000;MLEAC=1;MLEAF=0.333;MQ=60.00;MQ0=0;MQRankSum=0.000;QD=7.56;ReadPosRankSum=0.536;SOR=0.698;VQSLOD=21.69;culprit=MQ;ANN=G|protein_protein_contact|HIGH|HGS|HGS|interaction|3OBQ:A_143-B_351:NM_006292.3-NM_004712.4|protein_coding|13/22|c.1052C>G||||||,G|missense_variant|MODERATE|HGS|HGS|transcript|NM_004712.4|protein_coding|13…	GT:AD:DP:GQ:PL	0/0/1:52,30:82:66:647,0,66,1441
17	80022802	.	T	C	786.66	PASS	AC=1;AF=0.333;AN=3;BaseQRankSum=1.114;ClippingRankSum=0.000;DP=70;FS=6.648;MLEAC=1;MLEAF=0.333;MQ=60.00;MQ0=0;MQRankSum=0.000;QD=11.24;ReadPosRankSum=-0.107;SOR=1.599;VQSLOD=21.93;culprit=MQ;ANN=C|missense_variant|MODERATE|DUS1L|DUS1L|transcript|NM_022156.4|protein_coding|2/14|c.134A>G|p.Tyr45Cys|353/1884|134/1422|45/473||	GT:AD:DP:GQ:PL	0/0/1:39,31:70:24:814,0,24,1027
18	25565101	.	G	A	395.64	PASS	AC=1;AF=0.333;AN=3;BaseQRankSum=1.245;ClippingRankSum=0.000;DP=89;FS=2.173;MLEAC=1;MLEAF=0.333;MQ=60.00;MQ0=0;MQRankSum=0.000;QD=4.50;ReadPosRankSum=-0.692;SOR=0.450;VQSLOD=21.43;culprit=QD;ANN=A|missense_variant|MODERATE|CDH2|CDH2|transcript|NM_001792.4|protein_coding|13/16|c.2072C>T|p.Ser691Leu|2496/4335|2072/2721|691/906||	GT:AD:DP:GQ:PL	0/0/1:68,20:88:99:423,0,143,1904
18	25573588	.	T	C	357.64	PASS	AC=1;AF=0.333;AN=3;BaseQRankSum=-1.072;ClippingRankSum=0.000;DP=77;FS=0.000;MLEAC=1;MLEAF=0.333;MQ=60.00;MQ0=0;MQRankSum=0.000;QD=4.64;ReadPosRankSum=-1.325;SOR=0.562;VQSLOD=21.56;culprit=QD;ANN=C|missense_variant|MODERATE|CDH2|CDH2|transcript|NM_001792.4|protein_coding|8/16|c.1034A>G|p.Tyr345Cys|1458/4335|1034/2721|345/906||	GT:AD:DP:GQ:PL	0/0/1:60,17:77:99:385,0,129,1791
18	50451634	.	C	A	512.77	PASS	AC=1;AF=0.500;AN=2;BaseQRankSum=-1.478;ClippingRankSum=0.000;DP=33;ExcessHet=3.0103;FS=7.949;MLEAC=1;MLEAF=0.500;MQ=60.00;MQ0=0;MQRankSum=0.000;QD=15.54;ReadPosRankSum=-0.627;SOR=0.126;VQSLOD=20.93;culprit=MQ;ANN=A|missense_variant|MODERATE|DCC|DCC|transcript|NM_005215.3|protein_coding|5/29|c.879C>A|p.Ser293Arg|1495/10210|879/4344|293/1447||	GT:AD:DP:GQ:PL	0/1:14,19:33:99:541,0,380
18	51715254	.	T	G	757.77	PASS	AC=1;AF=0.500;AN=2;BaseQRankSum=-3.019;ClippingRankSum=0.000;DP=64;ExcessHet=3.0103;FS=3.320;MLEAC=1;MLEAF=0.500;MQ=60.00;MQ0=0;MQRankSum=0.000;QD=11.84;ReadPosRankSum=1.353;SOR=0.399;VQSLOD=21.56;culprit=MQ;ANN=G|missense_variant|MODERATE|MBD2|MBD2|transcript|NM_003927.4|protein_coding|3/7|c.830A>C|p.Gln277Pro|1059/5188|830/1236|277/411||	GT:AD:DP:GQ:PL	0/1:32,32:64:99:786,0,869
18	51739259	.	G	A	437.78	PASS	AC=2;AF=1.00;AN=2;BaseQRankSum=1.041;ClippingRankSum=0.000;DP=23;ExcessHet=3.0103;FS=0.000;MLEAC=2;MLEAF=1.00;MQ=60.00;MQ0=0;MQRankSum=0.000;QD=25.75;ReadPosRankSum=0.412;SOR=0.330;VQSLOD=20.03;culprit=QD;ANN=A|sequence_feature|MODERATE|MBD2|MBD2|modified-residue:phosphoserine|NM_003927.4|protein_coding||c.543-7732C>T||||||,A|intron_variant|MODIFIER|MBD2|MBD2|transcript|NM_003927.4|protein_coding…	GT:AD:DP:GQ:PL	1/1:1,16:17:24:466,24,0
18	56202863	.	C	T	653.77	PASS	AC=1;AF=0.500;AN=2;BaseQRankSum=3.039;ClippingRankSum=0.000;DP=46;ExcessHet=3.0103;FS=0.000;MLEAC=1;MLEAF=0.500;MQ=60.00;MQ0=0;MQRankSum=0.000;QD=14.21;ReadPosRankSum=-1.112;SOR=0.836;VQSLOD=21.29;culprit=MQ;ANN=T|missense_variant|MODERATE|ALPK2|ALPK2|transcript|NM_052947.3|protein_coding|5/13|c.4556G>A|p.Gly1519Glu|4770/7300|4556/6513|1519/2170||	GT:AD:DP:GQ:PL	0/1:22,24:46:99:682,0,558
18	76753617	.	C	A	335.77	PASS	AC=1;AF=0.500;AN=2;BaseQRankSum=-1.181;ClippingRankSum=0.000;DP=35;ExcessHet=3.0103;FS=0.000;MLEAC=1;MLEAF=0.500;MQ=60.00;MQ0=0;MQRankSum=0.000;QD=9.59;ReadPosRankSum=-0.405;SOR=0.922;VQSLOD=20.92;culprit=MQ;ANN=A|missense_variant|MODERATE|SALL3|SALL3|transcript|NM_171999.3|protein_coding|2/3|c.1626C>A|p.Asp542Glu|1626/5550|1626/3903|542/1300||	GT:AD:DP:GQ:PL	0/1:19,16:35:99:364,0,492
19	460668	rs189741717	C	G	166.98	PASS	AC=3;AF=1.00;AN=3;DB;DP=6;FS=0.000;MLEAC=3;MLEAF=1.00;MQ=59.04;MQ0=0;QD=27.83;SOR=3.912;VQSLOD=3.05;culprit=DP;ANN=G|missense_variant|MODERATE|SHC2|SHC2|transcript|NM_012435.2|protein_coding|1/13|c.329G>C|p.Gly110Ala|329/2494|329/1749|110/582||,G|downstream_gene_variant|MODIFIER|ODF3L2|ODF3L2|transcript|NM_182577.2|protein_coding||c.*3176G>C|||||2678|	GT:AD:DP:GQ:PL	1/1/1:0,6:6:11:194,29,11,0
19	871179	.	G	A	622.64	PASS	AC=1;AF=0.333;AN=3;BaseQRankSum=-2.677;ClippingRankSum=0.000;DP=69;FS=0.000;MLEAC=1;MLEAF=0.333;MQ=60.00;MQ0=0;MQRankSum=0.000;QD=9.02;ReadPosRankSum=0.786;SOR=0.784;VQSLOD=21.74;culprit=MQ;ANN=A|missense_variant|MODERATE|MED16|MED16|transcript|NM_005481.2|protein_coding|13/16|c.2173C>T|p.Leu725Phe|2324/2924|2173/2634|725/877||	GT:AD:DP:GQ:PL	0/0/1:41,28:69:41:650,0,41,1157
19	3546159	.	C	A	1216.64	PASS	AC=2;AF=0.667;AN=3;BaseQRankSum=0.036;ClippingRankSum=0.000;DP=72;FS=0.000;MLEAC=2;MLEAF=0.667;MQ=60.00;MQ0=0;MQRankSum=0.000;QD=16.90;ReadPosRankSum=-0.471;SOR=0.681;VQSLOD=21.76;culprit=MQ;ANN=A|missense_variant|MODERATE|MFSD12|MFSD12|transcript|NM_174983.4|protein_coding|8/10|c.1202G>T|p.Gly401Val|1383/2135|1202/1443|401/480||,A|downstream_gene_variant|MODIFIER|C19orf71|C19orf71|transcript|NM_…	GT:AD:DP:GQ:PL	0/1/1:26,46:72:60:1244,60,0,605
19	3548191	.	G	A	1479.64	PASS	AC=2;AF=0.667;AN=3;BaseQRankSum=2.208;ClippingRankSum=0.000;DP=82;FS=3.175;MLEAC=2;MLEAF=0.667;MQ=60.00;MQ0=0;MQRankSum=0.000;QD=18.04;ReadPosRankSum=1.013;SOR=1.101;VQSLOD=21.51;culprit=MQ;ANN=A|missense_variant|MODERATE|MFSD12|MFSD12|transcript|NM_174983.4|protein_coding|3/10|c.584C>T|p.Ser195Leu|765/2135|584/1443|195/480||,A|downstream_gene_variant|MODIFIER|C19orf71|C19orf71|transcript|NM_0011…	GT:AD:DP:GQ:PL	0/1/1:26,56:82:89:1507,89,0,524
19	4054509	.	G	A	557.67	PASS	AC=2;AF=0.667;AN=3;BaseQRankSum=1.093;ClippingRankSum=0.000;DP=40;FS=0.000;MLEAC=2;MLEAF=0.667;MQ=60.00;MQ0=0;MQRankSum=0.000;QD=13.94;ReadPosRankSum=-0.375;SOR=0.561;VQSLOD=21.17;culprit=MQ;ANN=A|missense_variant|MODERATE|ZBTB7A|ZBTB7A|transcript|NM_001317990.1|protein_coding|2/3|c.722C>T|p.Pro241Leu|837/6318|722/1755|241/584||	GT:AD:DP:GQ:PL	0/1/1:16,24:40:22:585,22,0,368
19	9068683	.	G	C	491.64	PASS	AC=1;AF=0.333;AN=3;BaseQRankSum=1.403;ClippingRankSum=0.000;DP=78;FS=3.528;MLEAC=1;MLEAF=0.333;MQ=60.00;MQ0=0;MQRankSum=0.000;QD=6.38;ReadPosRankSum=1.087;SOR=0.333;VQSLOD=21.59;culprit=QD;ANN=C|missense_variant|MODERATE|MUC16|MUC16|transcript|NM_024690.2|protein_coding|3/84|c.18763C>G|p.Pro6255Ala|18967/43816|18763/43524|6255/14507||	GT:AD:DP:GQ:PL	0/0/1:55,22:77:99:519,0,99,1593
19	10225391	.	C	T	543.64	PASS	AC=1;AF=0.333;AN=3;BaseQRankSum=0.504;ClippingRankSum=0.000;DP=68;FS=3.437;MLEAC=1;MLEAF=0.333;MQ=60.00;MQ0=0;MQRankSum=0.000;QD=7.99;ReadPosRankSum=-1.350;SOR=1.167;VQSLOD=21.57;culprit=MQ;ANN=T|stop_gained|HIGH|PPAN-P2RY11|PPAN-P2RY11|transcript|NM_001040664.2|protein_coding|13/13|c.2362C>T|p.Gln788*|2534/3207|2362/2385|788/794||,T|stop_gained|HIGH|P2RY11|P2RY11|transcript|NM_002566.4|protein_c…	GT:AD:DP:GQ:PL	0/0/1:43,25:68:55:571,0,55,1183
19	13186485	.	G	C	1590.64	PASS	AC=2;AF=0.667;AN=3;BaseQRankSum=-3.805;ClippingRankSum=0.000;DP=78;FS=5.442;MLEAC=2;MLEAF=0.667;MQ=60.00;MQ0=0;MQRankSum=0.000;QD=20.39;ReadPosRankSum=-0.165;SOR=1.051;VQSLOD=21.74;culprit=MQ;ANN=C|missense_variant&splice_region_variant|MODERATE|NFIX|NFIX|transcript|NM_001271043.2|protein_coding|6/11|c.979G>C|p.Gly327Arg|1032/5733|979/1533|327/510||	GT:AD:DP:GQ:PL	0/1/1:18,60:78:99:1618,126,0,397
19	19313629	.	C	T	1620.64	PASS	AC=2;AF=0.667;AN=3;BaseQRankSum=-0.640;ClippingRankSum=0.000;DP=76;FS=2.265;MLEAC=2;MLEAF=0.667;MQ=60.00;MQ0=0;MQRankSum=0.000;QD=21.32;ReadPosRankSum=2.845;SOR=0.681;VQSLOD=20.79;culprit=ReadPosRankSum;ANN=T|missense_variant|MODERATE|NR2C2AP|NR2C2AP|transcript|NM_001300945.1|protein_coding|2/6|c.100G>A|p.Asp34Asn|469/936|100/504|34/167||,T|downstream_gene_variant|MODIFIER|RFXANK|RFXANK|transcrip…	GT:AD:DP:GQ:PL	0/1/1:18,58:76:99:1648,120,0,381
19	35250532	.	C	T	1508.64	PASS	AC=2;AF=0.667;AN=3;BaseQRankSum=0.269;ClippingRankSum=0.000;DP=82;FS=1.875;MLEAC=2;MLEAF=0.667;MQ=60.00;MQ0=0;MQRankSum=0.000;QD=18.40;ReadPosRankSum=1.313;SOR=0.500;VQSLOD=21.42;culprit=MQ;ANN=T|missense_variant|MODERATE|ZNF599|ZNF599|transcript|NM_001007248.2|protein_coding|4/4|c.1174G>A|p.Glu392Lys|1562/3115|1174/1767|392/588||	GT:AD:DP:GQ:PL	0/1/1:29,53:82:73:1536,73,0,668
19	41223655	.	G	C	264.64	PASS	AC=1;AF=0.333;AN=3;BaseQRankSum=-1.032;ClippingRankSum=0.000;DP=76;FS=4.223;MLEAC=1;MLEAF=0.333;MQ=60.00;MQ0=0;MQRankSum=0.000;QD=3.48;ReadPosRankSum=-1.964;SOR=1.298;VQSLOD=21.30;culprit=QD;ANN=C|missense_variant|MODERATE|ITPKC|ITPKC|transcript|NM_025194.2|protein_coding|1/7|c.615G>C|p.Gln205His|648/3385|615/2052|205/683||,C|upstream_gene_variant|MODIFIER|COQ8B|COQ8B|transcript|NM_024876.3|prote…	GT:AD:DP:GQ:PL	0/0/1:62,14:76:99:292,0,144,1881
19	42795793	.	G	A	1209.64	PASS	AC=2;AF=0.667;AN=3;BaseQRankSum=1.367;ClippingRankSum=0.000;DP=81;FS=0.000;MLEAC=2;MLEAF=0.667;MQ=60.00;MQ0=0;MQRankSum=0.000;QD=14.93;ReadPosRankSum=-1.435;SOR=0.710;VQSLOD=21.56;culprit=MQ;ANN=A|missense_variant|MODERATE|CIC|CIC|transcript|NM_001304815.1|protein_coding|12/21|c.5509G>A|p.Ala1837Thr|5577/8227|5509/7554|1837/2517||	GT:AD:DP:GQ:PL	0/1/1:31,50:81:55:1237,55,0,676
19	48024817	.	G	T	630.64	PASS	AC=1;AF=0.333;AN=3;BaseQRankSum=0.715;ClippingRankSum=0.000;DP=95;FS=11.363;MLEAC=1;MLEAF=0.333;MQ=60.00;MQ0=0;MQRankSum=0.000;QD=6.64;ReadPosRankSum=-2.203;SOR=1.814;VQSLOD=20.78;culprit=ReadPosRankSum;ANN=T|missense_variant|MODERATE|ZNF541|ZNF541|transcript|NM_001277075.1|protein_coding|14/15|c.3806C>A|p.Pro1269Gln|3806/4580|3806/4041|1269/1346||	GT:AD:DP:GQ:PL	0/0/1:67,28:95:99:658,0,118,1992
19	50169254	.	A	G	308.64	PASS	AC=1;AF=0.333;AN=3;BaseQRankSum=-0.925;ClippingRankSum=0.000;DP=55;FS=4.362;MLEAC=1;MLEAF=0.333;MQ=60.00;MQ0=0;MQRankSum=0.000;QD=5.72;ReadPosRankSum=0.368;SOR=0.976;VQSLOD=21.54;culprit=QD;ANN=G|missense_variant|MODERATE|BCL2L12|BCL2L12|transcript|NM_138639.1|protein_coding|1/7|c.174A>G|p.Ile58Met|856/1855|174/1005|58/334||,G|upstream_gene_variant|MODIFIER|IRF3|IRF3|transcript|NM_001197122.1|pro…	GT:AD:DP:GQ:PL	0/0/1:39,15:54:72:336,0,72,1111
19	52469407	.	C	A	962.65	PASS	AC=1;AF=0.333;AN=3;BaseQRankSum=-1.584;ClippingRankSum=0.000;DP=86;FS=0.000;MLEAC=1;MLEAF=0.333;MQ=60.00;MQ0=0;MQRankSum=0.000;QD=11.19;ReadPosRankSum=0.288;SOR=0.693;VQSLOD=21.65;culprit=MQ;ANN=A|missense_variant|MODERATE|ZNF350|ZNF350|transcript|NM_021632.3|protein_coding|5/5|c.299G>T|p.Arg100Met|527/2341|299/1599|100/532||,A|intron_variant|MODIFIER|ZNF350-AS1|ZNF350-AS1|transcript|NR_103847.1|…	GT:AD:DP:GQ:PL	0/0/1:48,38:86:29:990,0,29,1327
19	56000828	.	G	A	479.64	PASS	AC=1;AF=0.333;AN=3;BaseQRankSum=-1.826;ClippingRankSum=0.000;DP=84;FS=0.000;MLEAC=1;MLEAF=0.333;MQ=60.00;MQ0=0;MQRankSum=0.000;QD=5.78;ReadPosRankSum=-1.124;SOR=0.620;VQSLOD=21.54;culprit=QD;ANN=A|missense_variant|MODERATE|SSC5D|SSC5D|transcript|NM_001144950.1|protein_coding|3/14|c.160G>A|p.Ala54Thr|247/4910|160/4722|54/1573||,A|downstream_gene_variant|MODIFIER|ZNF628|ZNF628|transcript|NM_033113.…	GT:AD:DP:GQ:PL	0/0/1:59,24:83:99:507,0,106,1691
19	58805547	.	G	A	861.64	PASS	AC=1;AF=0.333;AN=3;BaseQRankSum=1.366;ClippingRankSum=0.000;DP=82;FS=0.833;MLEAC=1;MLEAF=0.333;MQ=60.00;MQ0=0;MQRankSum=0.000;QD=10.51;ReadPosRankSum=1.509;SOR=0.822;VQSLOD=21.48;culprit=MQ;ANN=A|missense_variant|MODERATE|ZNF8|ZNF8|transcript|NM_021089.2|protein_coding|4/4|c.373G>A|p.Glu125Lys|503/2210|373/1728|125/575||	GT:AD:DP:GQ:PL	0/0/1:47,35:82:37:889,0,37,1245
20	1961118	.	G	A	1566.77	PASS	AC=2;AF=1.00;AN=2;DP=51;ExcessHet=3.0103;FS=0.000;MLEAC=2;MLEAF=1.00;MQ=60.00;MQ0=0;QD=31.34;SOR=1.051;VQSLOD=19.91;culprit=MQ;ANN=A|missense_variant|MODERATE|PDYN|PDYN|transcript|NM_001190892.1|protein_coding|3/3|c.616C>T|p.Arg206Cys|858/2574|616/765|206/254||,A|intron_variant|MODIFIER|LOC727993|LOC727993|transcript|NR_134520.1|pseudogene|3/3|n.1252+14129G>A||||||	GT:AD:DP:GQ:PL	1/1:0,50:50:99:1595,149,0
20	45174564	.	C	A	813.64	PASS	AC=1;AF=0.333;AN=3;BaseQRankSum=-1.580;ClippingRankSum=0.000;DP=96;FS=0.000;MLEAC=1;MLEAF=0.333;MQ=60.00;MQ0=0;MQRankSum=0.000;QD=8.56;ReadPosRankSum=-0.528;SOR=0.674;VQSLOD=21.37;culprit=MQ;ANN=A|missense_variant|MODERATE|OCSTAMP|OCSTAMP|transcript|NM_080721.2|protein_coding|2/3|c.449G>T|p.Arg150Met|463/1958|449/1701|150/566||	GT:AD:DP:GQ:PL	0/0/1:59,36:95:69:841,0,69,1633
20	61288317	.	C	T	903.64	PASS	AC=1;AF=0.333;AN=3;BaseQRankSum=1.199;ClippingRankSum=0.000;DP=93;FS=0.784;MLEAC=1;MLEAF=0.333;MQ=60.00;MQ0=0;MQRankSum=0.000;QD=9.72;ReadPosRankSum=-0.452;SOR=0.678;VQSLOD=21.44;culprit=MQ;ANN=T|missense_variant|MODERATE|SLCO4A1|SLCO4A1|transcript|NM_016354.3|protein_coding|2/12|c.511C>T|p.Arg171Cys|716/2776|511/2169|171/722||	GT:AD:DP:GQ:PL	0/0/1:54,39:93:44:931,0,44,1342
21	18976590	.	C	T	231.64	PASS	AC=1;AF=0.333;AN=3;BaseQRankSum=1.523;ClippingRankSum=0.000;DP=52;FS=7.248;MLEAC=1;MLEAF=0.333;MQ=60.00;MQ0=0;MQRankSum=0.000;QD=4.45;ReadPosRankSum=1.029;SOR=0.735;VQSLOD=21.48;culprit=QD;ANN=T|missense_variant|MODERATE|BTG3|BTG3|transcript|NM_001130914.1|protein_coding|4/6|c.316G>A|p.Asp106Asn|576/1594|316/891|106/296||	GT:AD:DP:GQ:PL	0/0/1:40,12:52:82:259,0,82,1053
21	26966275	.	A	C	875.2	PASS	AC=2;AF=0.500;AN=4;BaseQRankSum=-2.993;ClippingRankSum=0.000;DP=87;FS=5.530;MLEAC=2;MLEAF=0.500;MQ=60.00;MQ0=0;MQRankSum=0.000;QD=10.30;ReadPosRankSum=-0.616;SOR=0.721;VQSLOD=21.67;culprit=MQ;ANN=C|sequence_feature|MODERATE|MRPL39|MRPL39|modified-residue:N6-acetyllysine|NM_080794.3|protein_coding||c.702-5T>G||||||,C|splice_region_variant&intron_variant|LOW|MRPL39|MRPL39|transcript|NM_080794.3|pro…	GT:AD:DP:GQ:PL	0/0/1/1:47,38:85:30:902,30,0,74,1289
21	32007692	.	G	C	696.53	PASS	AC=2;AF=0.500;AN=4;BaseQRankSum=2.130;ClippingRankSum=0.000;DP=67;FS=2.101;MLEAC=2;MLEAF=0.500;MQ=60.00;MQ0=0;MQRankSum=0.000;QD=10.40;ReadPosRankSum=1.137;SOR=0.982;VQSLOD=21.62;culprit=MQ;ANN=C|missense_variant|MODERATE|KRTAP20-2|KRTAP20-2|transcript|NM_181616.1|protein_coding|1/1|c.110G>C|p.Cys37Ser|110/198|110/198|37/65||	GT:AD:DP:GQ:PL	0/0/1/1:40,27:67:11:723,11,0,72,1109
21	32554909	.	G	T	607.2	PASS	AC=1;AF=0.250;AN=4;BaseQRankSum=-0.851;ClippingRankSum=0.000;DP=102;FS=11.319;MLEAC=1;MLEAF=0.250;MQ=60.00;MQ0=0;MQRankSum=0.000;QD=5.95;ReadPosRankSum=1.129;SOR=1.055;VQSLOD=20.83;culprit=QD;ANN=T|structural_interaction_variant|HIGH|TIAM1|TIAM1|interaction|3KZD:A_871-A_906:NM_003253.2|protein_coding|16/29|c.2716C>A||||||,T|structural_interaction_variant|HIGH|TIAM1|TIAM1|interaction|3KZE:A_871-A_…	GT:AD:DP:GQ:PL	0/0/0/1:76,26:102:54:634,0,54,234,2212
21	41414544	.	G	T	328.2	PASS	AC=1;AF=0.250;AN=4;BaseQRankSum=0.006;ClippingRankSum=0.000;DP=81;FS=5.387;MLEAC=1;MLEAF=0.250;MQ=60.00;MQ0=0;MQRankSum=0.000;QD=4.05;ReadPosRankSum=0.128;SOR=0.918;VQSLOD=21.69;culprit=QD;ANN=T|missense_variant|MODERATE|DSCAM|DSCAM|transcript|NM_001389.3|protein_coding|32/33|c.5440C>A|p.Leu1814Met|5892/7109|5440/6039|1814/2012||	GT:AD:DP:GQ:PL	0/0/0/1:64,17:81:61:355,0,61,222,1839
21	41414571	.	C	T	38.2	PASS	AC=1;AF=0.250;AN=4;BaseQRankSum=-3.208;ClippingRankSum=0.000;DP=76;FS=13.892;MLEAC=1;MLEAF=0.250;MQ=60.00;MQ0=0;MQRankSum=0.000;QD=0.50;ReadPosRankSum=-1.580;SOR=3.242;VQSLOD=20.33;culprit=QD;ANN=T|missense_variant|MODERATE|DSCAM|DSCAM|transcript|NM_001389.3|protein_coding|32/33|c.5413G>A|p.Glu1805Lys|5865/7109|5413/6039|1805/2012||	GT:AD:DP:GQ:PL	0/0/0/1:72,4:76:65:65,0,117,329,4174
21	41414573	.	G	T	38.2	PASS	AC=1;AF=0.250;AN=4;BaseQRankSum=-3.182;ClippingRankSum=0.000;DP=76;FS=14.419;MLEAC=1;MLEAF=0.250;MQ=60.00;MQ0=0;MQRankSum=0.000;QD=0.50;ReadPosRankSum=-1.639;SOR=3.239;VQSLOD=20.13;culprit=QD;ANN=T|missense_variant|MODERATE|DSCAM|DSCAM|transcript|NM_001389.3|protein_coding|32/33|c.5411C>A|p.Thr1804Lys|5863/7109|5411/6039|1804/2012||	GT:AD:DP:GQ:PL	0/0/0/1:72,4:76:65:65,0,117,329,4174
21	41414577	.	A	C	41.2	PASS	AC=1;AF=0.250;AN=4;BaseQRankSum=-2.998;ClippingRankSum=0.000;DP=71;FS=16.118;MLEAC=1;MLEAF=0.250;MQ=60.00;MQ0=0;MQRankSum=0.000;QD=0.58;ReadPosRankSum=-2.734;SOR=3.233;VQSLOD=19.04;culprit=FS;ANN=C|missense_variant|MODERATE|DSCAM|DSCAM|transcript|NM_001389.3|protein_coding|32/33|c.5407T>G|p.Ser1803Ala|5859/7109|5407/6039|1803/2012||	GT:AD:DP:GQ:PL	0/0/0/1:67,4:71:68:68,0,111,315,4520
21	42540329	.	C	T	194.97	PASS	AC=2;AF=0.500;AN=4;BaseQRankSum=-0.792;ClippingRankSum=0.000;DP=25;FS=3.010;MLEAC=2;MLEAF=0.500;MQ=60.00;MQ0=0;MQRankSum=0.000;QD=7.80;ReadPosRankSum=0.119;SOR=1.880;VQSLOD=20.29;culprit=DP;ANN=T|missense_variant|MODERATE|BACE2|BACE2|transcript|NM_012105.4|protein_coding|1/9|c.139C>T|p.Pro47Ser|602/8930|139/1557|47/518||,T|downstream_gene_variant|MODIFIER|MIR3197|MIR3197|transcript|NR_036167.1|ps…	GT:AD:DP:GQ:PL	0/0/1/1:15,10:25:3:220,3,0,27,392
21	44841184	.	G	C	1026.2	PASS	AC=2;AF=0.500;AN=4;BaseQRankSum=0.068;ClippingRankSum=0.000;DP=105;FS=4.941;MLEAC=2;MLEAF=0.500;MQ=60.00;MQ0=0;MQRankSum=0.000;QD=9.77;ReadPosRankSum=0.137;SOR=1.165;VQSLOD=21.06;culprit=MQ;ANN=C|missense_variant|MODERATE|LOC102724428|LOC102724428|transcript|NM_001320643.1|protein_coding|6/14|c.563C>G|p.Pro188Arg|696/4744|563/2352|188/783||,C|missense_variant|MODERATE|SIK1|SIK1|transcript|NM_1733…	GT:AD:DP:GQ:PL	0/0/1/1:59,46:105:35:1053,35,0,91,1383
22	26346379	.	A	C	323.77	PASS	AC=1;AF=0.500;AN=2;BaseQRankSum=-0.631;ClippingRankSum=0.000;DP=28;ExcessHet=3.0103;FS=5.969;MLEAC=1;MLEAF=0.500;MQ=60.00;MQ0=0;MQRankSum=0.000;QD=11.56;ReadPosRankSum=0.568;SOR=0.148;VQSLOD=20.60;culprit=MQ;ANN=C|missense_variant|MODERATE|MYO18B|MYO18B|transcript|NM_001318245.1|protein_coding|37/44|c.5798A>C|p.Glu1933Ala|6057/8577|5798/7707|1933/2568||	GT:AD:DP:GQ:PL	0/1:12,16:28:99:352,0,264
22	36424450	rs9607299	A	C	457.77	PASS	AC=2;AF=1.00;AN=2;DB;DP=16;ExcessHet=3.0103;FS=0.000;MLEAC=2;MLEAF=1.00;MQ=60.00;MQ0=0;QD=28.61;SOR=4.174;VQSLOD=17.61;culprit=QD;ANN=C|missense_variant|MODERATE|RBFOX2|RBFOX2|transcript|NM_001082578.1|protein_coding|1/14|c.24T>G|p.His8Gln|136/6937|24/1356|8/451||	GT:AD:DP:GQ:PL	1/1:0,16:16:47:486,47,0
22	38374141	.	G	T	503.77	PASS	AC=1;AF=0.500;AN=2;BaseQRankSum=-4.064;ClippingRankSum=0.000;DP=62;ExcessHet=3.0103;FS=2.171;MLEAC=1;MLEAF=0.500;MQ=60.00;MQ0=0;MQRankSum=0.000;QD=8.26;ReadPosRankSum=1.247;SOR=0.611;VQSLOD=21.54;culprit=MQ;ANN=T|missense_variant&splice_region_variant|MODERATE|SOX10|SOX10|transcript|NM_006941.3|protein_coding|3/4|c.430C>A|p.Leu144Met|708/2862|430/1401|144/466||,T|intron_variant|MODIFIER|POLR2F|PO…	GT:AD:DP:GQ:PL	0/1:38,23:61:99:532,0,1085
22	43576915	.	G	A	1789.77	PASS	AC=2;AF=1.00;AN=2;DP=56;ExcessHet=3.0103;FS=0.000;MLEAC=2;MLEAF=1.00;MQ=60.00;MQ0=0;QD=31.96;SOR=0.922;VQSLOD=19.53;culprit=MQ;ANN=A|missense_variant|MODERATE|TTLL12|TTLL12|transcript|NM_015140.3|protein_coding|3/14|c.379C>T|p.Arg127Cys|441/3383|379/1935|127/644||	GT:AD:DP:GQ:PL	1/1:0,56:56:99:1818,167,0
22	46930480	.	A	C	667.77	PASS	AC=1;AF=0.500;AN=2;BaseQRankSum=-0.905;ClippingRankSum=0.000;DP=55;ExcessHet=3.0103;FS=7.450;MLEAC=1;MLEAF=0.500;MQ=60.00;MQ0=0;MQRankSum=0.000;QD=12.14;ReadPosRankSum=1.340;SOR=1.182;VQSLOD=21.60;culprit=MQ;ANN=C|missense_variant|MODERATE|CELSR1|CELSR1|transcript|NM_014246.1|protein_coding|1/35|c.2588T>G|p.Met863Arg|2588/11389|2588/9045|863/3014||	GT:AD:DP:GQ:PL	0/1:28,27:55:99:696,0,733
X	8138171	rs78723459	T	C	511.77	PASS	AC=2;AF=1.00;AN=2;DB;DP=16;ExcessHet=3.0103;FS=0.000;MLEAC=2;MLEAF=1.00;MQ=55.44;MQ0=0;QD=28.62;SOR=3.611;VQSLOD=3.14;culprit=QD;ANN=C|missense_variant|MODERATE|VCX2|VCX2|transcript|NM_016378.3|protein_coding|3/3|c.322A>G|p.Ser108Gly|629/815|322/420|108/139||	GT:AD:DP:GQ:PL	1/1:0,12:12:36:540,36,0
X	16836716	.	A	C	660.77	PASS	AC=1;AF=0.500;AN=2;BaseQRankSum=0.051;ClippingRankSum=0.000;DP=68;ExcessHet=3.0103;FS=3.241;MLEAC=1;MLEAF=0.500;MQ=60.00;MQ0=0;MQRankSum=0.000;QD=9.72;ReadPosRankSum=1.262;SOR=0.905;VQSLOD=21.60;culprit=MQ;ANN=C|missense_variant|MODERATE|TXLNG|TXLNG|transcript|NM_018360.2|protein_coding|2/10|c.122A>C|p.Glu41Ala|178/4396|122/1587|41/528||	GT:AD:DP:GQ:PL	0/1:38,30:68:99:689,0,965
X	24329643	.	G	T	1843.77	PASS	AC=2;AF=1.00;AN=2;DP=59;ExcessHet=3.0103;FS=0.000;MLEAC=2;MLEAF=1.00;MQ=56.40;MQ0=0;QD=31.25;SOR=0.950;VQSLOD=3.20;culprit=MQ;ANN=T|missense_variant|MODERATE|SUPT20HL2|SUPT20HL2|transcript|NM_001136233.1|protein_coding|1/1|c.1790C>A|p.Ala597Asp|1790/2454|1790/2454|597/817||	GT:AD:DP:GQ:PL	1/1:0,59:59:99:1872,176,0
X	36053843	.	A	G	1429.77	PASS	AC=2;AF=1.00;AN=2;DP=50;ExcessHet=3.0103;FS=0.000;MLEAC=2;MLEAF=1.00;MQ=60.00;MQ0=0;QD=28.60;SOR=1.519;VQSLOD=18.76;culprit=QD;ANN=G|missense_variant|MODERATE|CFAP47|CFAP47|transcript|NM_001304548.1|protein_coding|24/64|c.3683A>G|p.His1228Arg|3749/9943|3683/9564|1228/3187||	GT:AD:DP:GQ:PL	1/1:0,50:50:99:1458,149,0
X	38009131	.	G	T	645.77	PASS	AC=1;AF=0.500;AN=2;BaseQRankSum=-0.788;ClippingRankSum=0.000;DP=50;ExcessHet=3.0103;FS=2.463;MLEAC=1;MLEAF=0.500;MQ=60.00;MQ0=0;MQRankSum=0.000;QD=12.92;ReadPosRankSum=-1.014;SOR=1.250;VQSLOD=21.38;culprit=MQ;ANN=T|missense_variant|MODERATE|SRPX|SRPX|transcript|NM_006307.4|protein_coding|10/10|c.1228C>A|p.Pro410Thr|1360/1903|1228/1395|410/464||	GT:AD:DP:GQ:PL	0/1:25,25:50:99:674,0,685
X	47485494	.	G	A	406.77	PASS	AC=1;AF=0.500;AN=2;BaseQRankSum=1.033;ClippingRankSum=0.000;DP=45;ExcessHet=3.0103;FS=2.524;MLEAC=1;MLEAF=0.500;MQ=60.00;MQ0=0;MQRankSum=0.000;QD=9.04;ReadPosRankSum=0.768;SOR=1.093;VQSLOD=21.23;culprit=MQ;ANN=A|missense_variant|MODERATE|CFP|CFP|transcript|NM_001145252.1|protein_coding|8/9|c.1207C>T|p.Arg403Cys|1333/1598|1207/1410|403/469||	GT:AD:DP:GQ:PL	0/1:26,19:45:99:435,0,650
X	48846339	.	A	T	1907.77	PASS	AC=2;AF=1.00;AN=2;DP=60;ExcessHet=3.0103;FS=0.000;MLEAC=2;MLEAF=1.00;MQ=60.00;MQ0=0;QD=31.80;SOR=0.760;VQSLOD=20.19;culprit=MQ;ANN=T|sequence_feature|MODERATE|GRIPAP1|GRIPAP1|modified-residue:phosphoserine|NM_020137.4|protein_coding||c.722+45T>A||||||,T|intron_variant|MODIFIER|GRIPAP1|GRIPAP1|transcript|NM_020137.4|protein_coding|9/25|c.722+45T>A||||||	GT:AD:DP:GQ:PL	1/1:0,60:60:99:1936,180,0
X	54470975	.	A	G	998.77	PASS	AC=2;AF=1.00;AN=2;DP=31;ExcessHet=3.0103;FS=0.000;MLEAC=2;MLEAF=1.00;MQ=60.00;MQ0=0;QD=32.22;SOR=0.892;VQSLOD=19.29;culprit=MQ;ANN=G|missense_variant|MODERATE|TSR2|TSR2|transcript|NM_058163.1|protein_coding|5/5|c.568A>G|p.Lys190Glu|570/1326|568/576|190/191||,G|downstream_gene_variant|MODIFIER|FGD1|FGD1|transcript|NM_004463.2|protein_coding||c.*1567T>C|||||912|	GT:AD:DP:GQ:PL	1/1:0,31:31:93:1027,93,0
X	63488470	.	T	C	1454.77	PASS	AC=2;AF=1.00;AN=2;DP=52;ExcessHet=3.0103;FS=0.000;MLEAC=2;MLEAF=1.00;MQ=60.00;MQ0=0;QD=27.98;SOR=1.136;VQSLOD=18.29;culprit=QD;ANN=C|missense_variant|MODERATE|MTMR8|MTMR8|transcript|NM_017677.3|protein_coding|14/14|c.2062A>G|p.Thr688Ala|2152/2661|2062/2115|688/704||	GT:AD:DP:GQ:PL	1/1:0,52:52:99:1483,154,0

## Sheet: INDELs
hg19 reference; 1-based genomic coordinate counting
Table S5 K562 PPA Variants
CHROM	POS	ID	REF	ALT	QUAL	FILTER	INFO	FORMAT
1	1684347	rs150880809	C	CCCT	3394.16	PASS	AC=4;AF=1.00;AN=4;BaseQRankSum=-0.016;ClippingRankSum=0.237;DB;DP=96;FS=2.883;MLEAC=4;MLEAF=1.00;MQ=59.10;MQ0=0;MQRankSum=0.079;QD=26.86;ReadPosRankSum=-0.364;SOR=0.207;VQSLOD=1.41;culprit=DP;ANN=CCCT|conservative_inframe_insertion|MODERATE|NADK|NADK|transcript|NM_001198994.1|protein_coding|14/14|c.1769_1771dupAGG|p.Glu590dup|1976/3653|1771/1776|591/591||	GT:AD:DP:GQ:PL	1/1/1/1:2,76:78:51:3430,426,187,51,0
1	14107488	.	TTCA	T	1494.16	PASS	AC=2;AF=0.500;AN=4;BaseQRankSum=0.943;ClippingRankSum=0.627;DP=83;FS=0.000;MLEAC=2;MLEAF=0.500;MQ=60.00;MQ0=0;MQRankSum=0.913;QD=19.40;ReadPosRankSum=-0.390;SOR=0.738;VQSLOD=3.40;culprit=FS;ANN=T|disruptive_inframe_deletion|MODERATE|PRDM2|PRDM2|transcript|NM_012231.4|protein_coding|8/10|c.3201_3203delATC|p.Ser1068del|4057/7957|3201/5157|1067/1718||INFO_REALIGN_3_PRIME	GT:AD:DP:GQ:PL	0/0/1/1:37,40:77:41:1530,55,0,41,1755
1	17086085	rs200532237	G	GC	981.16	PASS	AC=4;AF=1.00;AN=4;DB;DP=29;FS=0.000;MLEAC=4;MLEAF=1.00;MQ=37.36;MQ0=0;QD=33.83;SOR=6.804;VQSLOD=4.95;culprit=FS;ANN=GC|frameshift_variant|HIGH|MST1L|MST1L|transcript|NM_001271733.1|protein_coding|7/15|c.811dupG|p.Ala271fs|811/4668|811/2070|271/689||,GC|non_coding_transcript_exon_variant|MODIFIER|LOC102724562|LOC102724562|transcript|NR_135824.1|pseudogene|2/11|n.265dupG||||||;LOF=(MST1L|MST1L|1|1.…	GT:AD:DP:GQ:PL	1/1/1/1:0,29:29:36:1017,174,87,36,0
1	26671538	.	AGCAC	A	551.92	PASS	AC=3;AF=0.750;AN=4;BaseQRankSum=-1.417;ClippingRankSum=1.255;DP=62;FS=3.910;MLEAC=3;MLEAF=0.750;MQ=59.08;MQ0=0;MQRankSum=1.164;QD=10.41;SOR=0.976;VQSLOD=1.07;culprit=QD;ANN=A|frameshift_variant|HIGH|AIM1L|AIM1L|transcript|NM_001039775.3|protein_coding|2/20|c.1607_1610delGTGC|p.Gly536fs|1760/5245|1607/4986|536/1661||;LOF=(AIM1L|AIM1L|1|1.00)	GT:AD:DP:GQ:PL	0/1/1/1:31,22:53:3:586,45,3,0,120
1	37975982	rs34785696	A	AT	33.31	PASS	AC=4;AF=1.00;AN=4;DB;DP=19;FS=0.000;MLEAC=4;MLEAF=1.00;MQ=60.00;MQ0=0;QD=6.66;SOR=1.981;VQSLOD=3.24;culprit=FS;ANN=AT|sequence_feature|MODERATE|MEAF6|MEAF6|modified-residue:N6-acetyllysine|NM_022756.5|protein_coding||c.207-840dupA||||||,AT|intron_variant|MODIFIER|MEAF6|MEAF6|transcript|NM_022756.5|protein_coding|2/7|c.207-840dupA||||||	GT:AD:DP:GQ:PL	1/1/1/1:0,5:5:6:68,26,13,6,0
1	45214379	.	A	AT	105.96	PASS	AC=3;AF=0.750;AN=4;BaseQRankSum=0.358;ClippingRankSum=0.358;DP=30;FS=0.000;MLEAC=1;MLEAF=0.250;MQ=60.36;MQ0=0;MQRankSum=0.358;QD=13.25;ReadPosRankSum=-0.358;SOR=1.179;VQSLOD=3.59;culprit=FS;ANN=AT|sequence_feature|MODERATE|KIF2C|KIF2C|modified-residue:phosphoserine|NM_006845.3|protein_coding||c.316+1007_316+1008insT||||||,AT|intron_variant|MODIFIER|KIF2C|KIF2C|transcript|NM_006845.3|protein_codin…	GT:AD:DP:GQ:PL	0/1/1/1:2,6:8:3:75,16,3,0,21
1	65279511	rs374340280	GACACACACACAC	G,GACACAC	2097.6	PASS	AC=1,2;AF=0.333,0.667;AN=3;DB;DP=66;FS=0.000;MLEAC=1,1;MLEAF=0.333,0.333;MQ=58.72;MQ0=0;POSITIVE_TRAIN_SITE;QD=29.32;SOR=0.909;VQSLOD=7.09;culprit=FS;ANN=G|sequence_feature|MODERATE|RAVER2|RAVER2|modified-residue:phosphoserine|NM_018211.3|protein_coding||c.1754-875_1754-864delACACACACACAC||||||,GACACAC|sequence_feature|MODERATE|RAVER2|RAVER2|modified-residue:phosphoserine|NM_018211.3|protein_codi…	GT:AD:DP:GQ:PL	1/2/2:0,26,27:53:4:2106,1060,982,941,1107,82,4,1023,0,973
1	67308910	rs34570402	GGGA	G	233.94	PASS	AC=3;AF=1.00;AN=3;DB;DP=8;FS=0.000;MLEAC=3;MLEAF=1.00;MQ=60.00;MQ0=0;QD=26.20;SOR=3.912;VQSLOD=4.72;culprit=FS;ANN=G|sequence_feature|MODERATE|WDR78|WDR78|compositionally-biased-region:Glu-rich|NM_024763.4|protein_coding||c.1292-2559_1292-2557delTCC||||||,G|intron_variant|MODIFIER|WDR78|WDR78|transcript|NM_024763.4|protein_coding|8/16|c.1292-2559_1292-2557delTCC||||||	GT:AD:DP:GQ:PL	1/1/1:0,6:6:11:270,29,11,0
1	67309767	rs150512205	C	CAAAA	37.8	PASS	AC=3;AF=1.00;AN=3;DB;DP=13;FS=0.000;MLEAC=3;MLEAF=1.00;MQ=60.00;MQ0=0;QD=30.30;SOR=1.609;VQSLOD=4.98;culprit=FS;ANN=CAAAA|sequence_feature|MODERATE|WDR78|WDR78|compositionally-biased-region:Glu-rich|NM_024763.4|protein_coding||c.1291+3396_1291+3399dupTTTT||||||,CAAAA|intron_variant|MODIFIER|WDR78|WDR78|transcript|NM_024763.4|protein_coding|8/16|c.1291+3396_1291+3399dupTTTT||||||	GT:AD:DP:GQ:PL	1/1/1:0,1:1:3:72,8,3,0
1	154842199	.	G	GGCTGCTGCTGCTGCTGCT	1771.6	PASS	AC=3;AF=1.00;AN=3;DP=61;FS=0.000;MLEAC=2;MLEAF=0.667;MQ=58.30;MQ0=0;QD=32.21;SOR=0.826;VQSLOD=5.03;culprit=FS;ANN=GGCTGCTGCTGCTGCTGCT|conservative_inframe_insertion|MODERATE|KCNN3|KCNN3|transcript|NM_001204087.1|protein_coding|1/9|c.224_241dupAGCAGCAGCAGCAGCAGC|p.Gln75_Gln80dup|555/13065|241/2241|81/746||	GT:AD:DP:GQ:PL	1/1/1:0,38:38:70:1797,192,70,0
1	175129945	rs60195884	TC	T	3835.16	PASS	AC=4;AF=1.00;AN=4;DB;DP=98;FS=0.000;MLEAC=4;MLEAF=1.00;MQ=58.86;MQ0=0;QD=31.61;SOR=0.852;VQSLOD=4.83;culprit=FS;ANN=T|frameshift_variant|HIGH|KIAA0040|KIAA0040|transcript|NM_001162893.1|protein_coding|5/5|c.204delG|p.Lys69fs|898/4721|204/300|68/99||;LOF=(KIAA0040|KIAA0040|1|1.00)	GT:AD:DP:GQ:PL	1/1/1/1:0,93:93:99:3871,558,280,116,0
1	192995824	.	TA	T	63.35	PASS	AC=1;AF=0.250;AN=4;BaseQRankSum=0.816;ClippingRankSum=0.000;DP=33;FS=4.558;MLEAC=1;MLEAF=0.250;MQ=60.00;MQ0=0;MQRankSum=0.000;QD=2.53;ReadPosRankSum=-0.176;SOR=1.946;VQSLOD=0.923;culprit=QD;ANN=T|sequence_feature|MODERATE|UCHL5|UCHL5|cross-link:Glycyl_lysine_isopeptide_(Lys-Gly)_(interchain_with_G-Cter_in_ubiquitin)|NM_015984.3|protein_coding||c.629+1390delT||||||,T|intron_variant|MODIFIER|UCHL5|…	GT:AD:DP:GQ:PL	0/0/0/1:18,7:25:10:98,0,10,51,363
1	193020606	.	T	TAAAAA	69.61	PASS	AC=1;AF=0.250;AN=4;BaseQRankSum=0.328;ClippingRankSum=0.000;DP=22;FS=0.000;MLEAC=1;MLEAF=0.250;MQ=60.00;MQ0=0;MQRankSum=0.000;QD=6.33;ReadPosRankSum=-1.440;SOR=0.368;VQSLOD=2.60;culprit=FS;ANN=TAAAAA|sequence_feature|MODERATE|UCHL5|UCHL5|cross-link:Glycyl_lysine_isopeptide_(Lys-Gly)_(interchain_with_G-Cter_in_ubiquitin)|NM_015984.3|protein_coding||c.140+273_140+277dupTTTTT||||||,TAAAAA|sequence_f…	GT:AD:DP:GQ:PL	0/0/0/1:7,4:11:2:65,0,2,17,256
1	220416695	rs34046394	CA	C	129.17	PASS	AC=2;AF=0.500;AN=4;BaseQRankSum=-0.930;ClippingRankSum=0.000;DB;DP=26;FS=6.990;MLEAC=1;MLEAF=0.250;MQ=60.00;MQ0=0;MQRankSum=0.000;QD=8.61;ReadPosRankSum=0.303;SOR=0.039;VQSLOD=0.678;culprit=FS;ANN=C|sequence_feature|MODERATE|RAB3GAP2|RAB3GAP2|modified-residue:Phosphoserine|NM_012414.3|protein_coding||c.116-10491delT||||||,C|intron_variant|MODIFIER|RAB3GAP2|RAB3GAP2|transcript|NM_012414.3|protein_…	GT:AD:DP:GQ:PL	0/0/1/1:6,9:15:1:119,14,0,1,63
2	17885366	.	C	CA	31.61	PASS	AC=1;AF=0.333;AN=3;BaseQRankSum=-0.947;ClippingRankSum=0.000;DP=32;FS=0.000;MLEAC=1;MLEAF=0.333;MQ=60.00;MQ0=0;MQRankSum=0.000;QD=1.13;ReadPosRankSum=1.382;SOR=0.665;VQSLOD=3.20;culprit=QD;ANN=CA|sequence_feature|MODERATE|SMC6|SMC6|modified-residue:Phosphoserine|NM_001142286.1|protein_coding||c.2007-808dupT||||||,CA|intron_variant|MODIFIER|SMC6|SMC6|transcript|NM_001142286.1|protein_coding|18/27|…	GT:AD:DP:GQ:PL	0/0/1:23,5:28:53:68,0,53,448
2	63057288	rs368948717	GACACACACAC	G,GACACACACACACAC	1300.6	PASS	AC=2,1;AF=0.667,0.333;AN=3;DB;DP=43;FS=0.000;MLEAC=2,1;MLEAF=0.667,0.333;MQ=60.00;MQ0=0;QD=27.86;SOR=1.609;VQSLOD=5.48;culprit=FS;ANN=G|sequence_feature|MODERATE|EHBP1|EHBP1|modified-residue:phosphothreonine|NM_015252.3|protein_coding||c.495-865_495-856delACACACACAC||||||,GACACACACACACAC|sequence_feature|MODERATE|EHBP1|EHBP1|modified-residue:phosphothreonine|NM_015252.3|protein_coding||c.495-859_…	GT:AD:DP:GQ:PL	1/1/2:0,27,6:33:64:1337,323,241,193,1096,82,0,1078,64,1068
2	73308223	rs67780878	TTCCTCC	T	392.6	PASS	AC=1;AF=0.333;AN=3;BaseQRankSum=0.406;ClippingRankSum=0.000;DB;DP=57;FS=1.328;MLEAC=1;MLEAF=0.333;MQ=60.00;MQ0=0;MQRankSum=0.000;POSITIVE_TRAIN_SITE;QD=9.13;ReadPosRankSum=1.980;SOR=0.458;VQSLOD=2.04;culprit=ReadPosRankSum;ANN=T|sequence_feature|MODERATE|RAB11FIP5|RAB11FIP5|modified-residue:phosphoserine|NM_015470.2|protein_coding||c.1569-4919_1569-4914delGGAGGA||||||,T|sequence_feature|LOW|RAB11…	GT:AD:DP:GQ:PL	0/0/1:31,12:43:57:429,0,57,1501
2	99963052	.	C	CTTTTTTTT	204.94	PASS	AC=3;AF=1.00;AN=3;DP=23;FS=0.000;MLEAC=3;MLEAF=1.00;MQ=57.97;MQ0=0;POSITIVE_TRAIN_SITE;QD=31.26;SOR=0.693;VQSLOD=4.98;culprit=FS;ANN=CTTTTTTTT|sequence_feature|MODERATE|EIF5B|EIF5B|modified-residue:phosphoserine|NM_015904.3|protein_coding||c.35+9000_35+9001insTTTTTTTT||||||,CTTTTTTTT|intron_variant|MODIFIER|EIF5B|EIF5B|transcript|NM_015904.3|protein_coding|1/23|c.35+9020_35+9027dupTTTTTTTT||||||I…	GT:AD:DP:GQ:PL	1/1/1:0,4:4:11:241,30,11,0
2	112621088	.	CAA	C	437.61	PASS	AC=3;AF=1.00;AN=3;DP=19;FS=0.000;MLEAC=3;MLEAF=1.00;MQ=55.22;MQ0=0;POSITIVE_TRAIN_SITE;QD=27.35;SOR=1.244;VQSLOD=5.66;culprit=FS;ANN=C|sequence_feature|MODERATE|ANAPC1|ANAPC1|modified-residue:phosphoserine|NM_022662.3|protein_coding||c.1052+162_1052+163delTT||||||,C|intron_variant|MODIFIER|ANAPC1|ANAPC1|transcript|NM_022662.3|protein_coding|9/47|c.1052+162_1052+163delTT||||||	GT:AD:DP:GQ:PL	1/1/1:0,16:16:30:474,81,30,0
2	128482672	.	CTCT	C	959.6	PASS	AC=1;AF=0.333;AN=3;BaseQRankSum=-1.743;ClippingRankSum=0.000;DP=77;FS=0.924;MLEAC=1;MLEAF=0.333;MQ=60.00;MQ0=0;MQRankSum=0.000;QD=12.97;ReadPosRankSum=-0.269;SOR=0.498;VQSLOD=1.19;culprit=FS;ANN=C|disruptive_inframe_deletion|MODERATE|WDR33|WDR33|transcript|NM_018383.4|protein_coding|9/22|c.966_968delAGA|p.Glu323del|1167/6299|966/4011|322/1336||	GT:AD:DP:GQ:PL	0/0/1:47,27:74:60:996,0,60,2219
2	133075478	rs111944984	TC	T	2489.6	PASS	AC=2;AF=0.667;AN=3;BaseQRankSum=-0.512;ClippingRankSum=0.000;DB;DP=150;FS=0.000;MLEAC=2;MLEAF=0.667;MQ=60.07;MQ0=0;MQRankSum=0.878;QD=17.17;ReadPosRankSum=-0.224;SOR=0.655;VQSLOD=0.808;culprit=FS;ANN=T|frameshift_variant|HIGH|ZNF806|ZNF806|transcript|NM_001304449.1|protein_coding|4/4|c.942delC|p.Tyr315fs|1028/1867|942/1770|314/589||INFO_REALIGN_3_PRIME;LOF=(ZNF806|ZNF806|1|1.00)	GT:AD:DP:GQ:PL	0/1/1:62,83:145:63:2526,63,0,1761
2	133076117	rs111405036	CA	C	1770.8	PASS	AC=2;AF=0.667;AN=3;BaseQRankSum=0.524;ClippingRankSum=0.000;DB;DP=116;FS=0.000;MLEAC=2;MLEAF=0.667;MQ=59.93;MQ0=0;MQRankSum=-1.983;QD=15.27;ReadPosRankSum=-1.411;SOR=0.690;VQSLOD=-1.334e-01;culprit=MQRankSum;ANN=C|frameshift_variant|HIGH|ZNF806|ZNF806|transcript|NM_001304449.1|protein_coding|4/4|c.1580delA|p.Asn527fs|1666/1867|1580/1770|527/589||INFO_REALIGN_3_PRIME;LOF=(ZNF806|ZNF806|1|1.00)	GT:AD:DP:GQ:PL	0/1/1:57,59:116:5:1806,5,0,1745
2	165551295	.	C	CA	138.19	PASS	AC=1;AF=0.250;AN=4;BaseQRankSum=-0.325;ClippingRankSum=0.000;DP=50;FS=5.592;MLEAC=1;MLEAF=0.250;MQ=60.00;MQ0=0;MQRankSum=0.000;QD=2.94;ReadPosRankSum=-2.077;SOR=1.828;VQSLOD=0.076;culprit=QD;ANN=CA|frameshift_variant|HIGH|COBLL1|COBLL1|transcript|NM_001278458.1|protein_coding|15/17|c.2921dupT|p.Leu974fs|3045/9587|2921/3702|974/1233||;LOF=(COBLL1|COBLL1|1|1.00)	GT:AD:DP:GQ:PL	0/0/0/1:37,10:47:34:174,0,34,126,788
2	202577856	.	C	CTTTTTTTTTTTTTTTTTTTTTTTTTT	131.73	PASS	AC=1;AF=0.500;AN=2;DP=13;ExcessHet=3.0103;FS=0.000;MLEAC=1;MLEAF=0.500;MQ=60.83;MQ0=0;QD=32.93;SOR=1.609;VQSLOD=4.40;culprit=FS;ANN=CTTTTTTTTTTTTTTTTTTTTTTTTTT|sequence_feature|MODERATE|ALS2|ALS2|modified-residue:phosphoserine|NM_020919.3|protein_coding||c.4005-2026_4005-2025insAAAAAAAAAAAAAAAAAAAAAAAAAA||||||,CTTTTTTTTTTTTTTTTTTTTTTTTTT|intron_variant|MODIFIER|ALS2|ALS2|transcript|NM_020919.3|pr…	GT:AD:DP:GQ:PL	0/1:1,3:4:6:137,0,6
3	9713144	rs146399430	AT	A	2158.16	PASS	AC=4;AF=1.00;AN=4;BaseQRankSum=-2.197;ClippingRankSum=0.000;DB;DP=107;FS=6.566;MLEAC=4;MLEAF=1.00;MQ=60.30;MQ0=0;MQRankSum=0.306;QD=22.96;ReadPosRankSum=1.057;SOR=0.387;VQSLOD=0.696;culprit=DP;ANN=A|sequence_feature|MODERATE|MTMR14|MTMR14|glycosylation-site:N-linked_(GlcNAc...)|NM_001077525.2|protein_coding||c.677+291delT||||||,A|intron_variant|MODIFIER|MTMR14|MTMR14|transcript|NM_001077525.2|pro…	GT:AD:DP:GQ:PL	1/1/1/1:2,92:94:70:2194,493,224,70,0
3	14444329	rs67559364	CT	C	3583.16	PASS	AC=4;AF=1.00;AN=4;DB;DP=82;FS=0.000;MLEAC=4;MLEAF=1.00;MQ=60.00;MQ0=0;POSITIVE_TRAIN_SITE;QD=32.51;SOR=1.581;VQSLOD=7.13;culprit=FS;ANN=C|splice_acceptor_variant&splice_donor_variant&intron_variant|HIGH|SLC6A6|SLC6A6|transcript|NM_001134367.3|protein_coding|8/22|c.229+1delT||||||;LOF=(SLC6A6|SLC6A6|1|1.00)	GT:AD:DP:GQ:PL	1/1/1/1:0,81:81:99:3619,488,244,101,0
3	100170600	rs71132521	A	ATCCTAGAAGGCATTCTCATGAGGACCAGGAATTCCGATGCCGATCGTCTGACCGTCT	2540.73	PASS	AC=2;AF=1.00;AN=2;DB;DP=50;ExcessHet=3.0103;FS=0.000;MLEAC=2;MLEAF=1.00;MQ=66.96;MQ0=0;POSITIVE_TRAIN_SITE;QD=29.44;SOR=0.902;VQSLOD=5.93;culprit=FS;ANN=ATCCTAGAAGGCATTCTCATGAGGACCAGGAATTCCGATGCCGATCGTCTGACCGTCT|disruptive_inframe_insertion|MODERATE|LNP1|LNP1|transcript|NM_001085451.1|protein_coding|3/4|c.221_222insGGAATTCCGATGCCGATCGTCTGACCGTCTTCCTAGAAGGCATTCTCATGAGGACCA|p.Gln74_Glu75insGluPheAr…	GT:AD:DP:GQ:PL	1/1:0,40:40:99:2578,169,0
3	113376110	.	T	TTGC	1039.73	PASS	AC=2;AF=1.00;AN=2;DP=35;ExcessHet=3.0103;FS=0.000;MLEAC=2;MLEAF=1.00;MQ=60.31;MQ0=0;POSITIVE_TRAIN_SITE;QD=33.83;SOR=1.220;VQSLOD=6.81;culprit=FS;ANN=TTGC|disruptive_inframe_insertion|MODERATE|USF3|USF3|transcript|NM_001009899.3|protein_coding|7/7|c.4416_4418dupGCA|p.Gln1473dup|4829/13707|4418/6738|1473/2245||	GT:AD:DP:GQ:PL	1/1:0,26:26:78:1077,78,0
3	119395870	.	CGGG	C	547.73	PASS	AC=2;AF=1.00;AN=2;DP=14;ExcessHet=3.0103;FS=0.000;MLEAC=2;MLEAF=1.00;MQ=60.00;MQ0=0;QD=35.17;SOR=5.283;VQSLOD=5.17;culprit=QD;ANN=C|sequence_feature|MODERATE|COX17|COX17|disulfide-bond:experimental_evidence_used_in_manual_assertion|NM_005694.1|protein_coding||c.107+178_107+180delCCC||||||,C|intron_variant|MODIFIER|COX17|COX17|transcript|NM_005694.1|protein_coding|1/2|c.107+178_107+180delCCC||||||	GT:AD:DP:GQ:PL	1/1:0,13:13:39:585,39,0
3	129324493	.	GT	G	567.73	PASS	AC=1;AF=0.500;AN=2;BaseQRankSum=0.187;ClippingRankSum=0.000;DP=41;ExcessHet=3.0103;FS=4.561;MLEAC=1;MLEAF=0.500;MQ=60.00;MQ0=0;MQRankSum=0.000;QD=13.85;ReadPosRankSum=1.525;SOR=1.053;VQSLOD=0.945;culprit=ReadPosRankSum;ANN=G|frameshift_variant|HIGH|PLXND1|PLXND1|transcript|NM_015103.2|protein_coding|1/36|c.989delA|p.Asp330fs|1089/6977|989/5778|330/1925||;LOF=(PLXND1|PLXND1|1|1.00)	GT:AD:DP:GQ:PL	0/1:23,18:41:99:605,0,800
3	133295685	.	CTTTTTT	C	112.92	PASS	AC=1;AF=0.500;AN=2;BaseQRankSum=-0.524;ClippingRankSum=0.000;DP=15;ExcessHet=3.0103;FS=0.000;MLEAC=1;MLEAF=0.500;MQ=57.31;MQ0=0;MQRankSum=-0.253;QD=22.58;ReadPosRankSum=0.000;SOR=0.223;VQSLOD=2.87;culprit=FS;ANN=C|sequence_feature|MODERATE|CDV3|CDV3|modified-residue:phosphoserine|NM_017548.4|protein_coding||c.317+1727_317+1732delTTTTTT||||||,C|intron_variant|MODIFIER|CDV3|CDV3|transcript|NM_01754…	GT:AD:DP:GQ:PL	0/1:1,4:5:5:149,0,5
3	150421527	.	C	CTCCTCCTCCTCCTCCACCTCT	254.94	PASS	AC=3;AF=1.00;AN=3;DP=24;FS=0.000;MLEAC=3;MLEAF=1.00;MQ=59.96;MQ0=0;QD=25.62;SOR=1.329;VQSLOD=5.09;culprit=FS;ANN=CTCCTCCTCCTCCTCCACCTCT|disruptive_inframe_insertion|MODERATE|ERICH6|ERICH6|transcript|NM_152394.4|protein_coding|1/14|c.138_158dupAGAGGTGGAGGAGGAGGAGGA|p.Glu53_Glu54insGluValGluGluGluGluGlu|231/2072|158/1992|53/663||,CTCCTCCTCCTCCTCCACCTCT|upstream_gene_variant|MODIFIER|ERICH6-AS1|ERIC…	GT:AD:DP:GQ:PL	1/1/1:0,6:6:11:291,32,11,0
3	180704074	rs138755965	G	GT	251.8	PASS	AC=3;AF=1.00;AN=3;BaseQRankSum=-1.172;ClippingRankSum=0.000;DB;DP=28;FS=3.310;MLEAC=3;MLEAF=1.00;MQ=60.77;MQ0=0;MQRankSum=0.588;POSITIVE_TRAIN_SITE;QD=16.79;ReadPosRankSum=-0.814;SOR=0.643;VQSLOD=2.30;culprit=QD;ANN=GT|sequence_feature|MODERATE|DNAJC19|DNAJC19|modified-residue:Phosphoserine|NM_145261.3|protein_coding||c.210-291dupA||||||,GT|downstream_gene_variant|MODIFIER|FXR1|FXR1|transcript|NM…	GT:AD:DP:GQ:PL	1/1/1:1,14:15:5:287,43,5,0
3	195508108	.	G	GAGGAAGGGCTGGTGACAGGAAGAGGGGTGGTGTGACCTGTGGATGCTA	533.67	PASS	AC=1;AF=0.333;AN=3;BaseQRankSum=0.000;ClippingRankSum=0.000;DP=37;FS=0.000;MLEAC=1;MLEAF=0.333;MQ=49.76;MQ0=0;MQRankSum=-2.493;QD=15.25;ReadPosRankSum=-0.017;SOR=0.693;VQSLOD=0.471;culprit=MQRankSum;ANN=GAGGAAGGGCTGGTGACAGGAAGAGGGGTGGTGTGACCTGTGGATGCTA|conservative_inframe_insertion|MODERATE|MUC4|MUC4|transcript|NM_018406.6|protein_coding|2/25|c.10342_10343insTAGCATCCACAGGTCACACCACCCCTCTTCCTGTCAC…	GT:AD:DP:GQ:PL	0/0/1:22,13:35:18:570,0,18,693
3	195513413	.	G	GGGTGGCGTGACCTGTGGATACTGAGGAATTGTCGGTGACAGGAAGAGGGGTGGCGTGACCGGTGGATGCTGAGGAAGTGCTGGTGACAGGAAGAGA	133.61	PASS	AC=1;AF=0.333;AN=3;BaseQRankSum=0.721;ClippingRankSum=0.000;DP=41;FS=0.000;MLEAC=1;MLEAF=0.333;MQ=46.65;MQ0=0;MQRankSum=-1.714;QD=4.77;ReadPosRankSum=0.537;SOR=0.784;VQSLOD=1.77;culprit=MQRankSum;ANN=GGGTGGCGTGACCTGTGGATACTGAGGAATTGTCGGTGACAGGAAGAGGGGTGGCGTGACCGGTGGATGCTGAGGAAGTGCTGGTGACAGGAAGAGA|conservative_inframe_insertion|MODERATE|MUC4|MUC4|transcript|NM_018406.6|protein_coding|2/25|c.5037_5…	GT:AD:DP:GQ:PL	0/0/1:24,4:28:33:170,0,33,520
3	195513799	.	GTGGTGTCACCTGTGGATGCTGAGGAAGGGCTAGTGACAGGAAGAGGCA	G	322.62	PASS	AC=1;AF=0.333;AN=3;BaseQRankSum=1.978;ClippingRankSum=0.000;DP=43;FS=1.670;MLEAC=1;MLEAF=0.333;MQ=49.30;MQ0=0;MQRankSum=-0.267;QD=10.08;ReadPosRankSum=0.317;SOR=1.179;VQSLOD=0.956;culprit=QD;ANN=G|disruptive_inframe_deletion|MODERATE|MUC4|MUC4|transcript|NM_018406.6|protein_coding|2/25|c.4604_4651delTGCCTCTTCCTGTCACTAGCCCTTCCTCAGCATCCACAGGTGACACCA|p.Met1535_Thr1550del|4807/16804|4604/16239|1535/5…	GT:AD:DP:GQ:PL	0/0/1:22,10:32:25:359,0,25,610
3	196202423	rs10646227	C	CTT	102.14	PASS	AC=3;AF=1.00;AN=3;DB;DP=20;FS=0.000;MLEAC=3;MLEAF=1.00;MQ=60.00;MQ0=0;POSITIVE_TRAIN_SITE;QD=20.43;SOR=1.022;VQSLOD=5.21;culprit=FS;ANN=CTT|sequence_feature|MODERATE|RNF168|RNF168|cross-link:Glycyl_lysine_isopeptide_(Lys-Gly)_(interchain_with_G-Cter_in_ubiquitin)|NM_152617.3|protein_coding||c.681-242_681-241dupAA||||||,CTT|intron_variant|MODIFIER|RNF168|RNF168|transcript|NM_152617.3|protein_codin…	GT:AD:DP:GQ:PL	1/1/1:0,5:5:9:138,23,9,0
3	197880130	.	GGCAGCA	G	2525.6	PASS	AC=3;AF=1.00;AN=3;BaseQRankSum=-1.715;ClippingRankSum=0.000;DP=82;FS=0.000;MLEAC=2;MLEAF=0.667;MQ=47.23;MQ0=0;MQRankSum=1.435;QD=29.12;SOR=0.321;VQSLOD=2.99;culprit=FS;ANN=G|disruptive_inframe_deletion|MODERATE|FAM157A|FAM157A|transcript|NM_001145248.1|protein_coding|2/7|c.246_251delGCAGCA|p.Gln83_Gln84del|246/1275|246/1152|82/383||INFO_REALIGN_3_PRIME	GT:AD:DP:GQ:PL	1/1/1:1,56:57:97:2508,266,97,0
4	3076654	.	G	GCAA	75.39	PASS	AC=1;AF=0.333;AN=3;BaseQRankSum=2.100;ClippingRankSum=0.000;DP=18;FS=0.000;MLEAC=1;MLEAF=0.333;MQ=53.06;MQ0=0;MQRankSum=-2.369;QD=9.42;ReadPosRankSum=2.369;SOR=0.368;VQSLOD=0.367;culprit=MQRankSum;ANN=GCAA|disruptive_inframe_insertion|MODERATE|HTT|HTT|transcript|NM_002111.8|protein_coding|1/67|c.104_105insACA|p.Gln35dup|250/13475|105/9429|35/3142||INFO_REALIGN_3_PRIME,GCAA|upstream_gene_variant|M…	GT:AD:DP:GQ:PL	0/0/1:5,3:8:7:111,0,7,180
4	83957411	rs33940074	ACC	A	1750.6	PASS	AC=3;AF=1.00;AN=3;DB;DP=50;FS=0.000;MLEAC=3;MLEAF=1.00;MQ=60.00;MQ0=0;POSITIVE_TRAIN_SITE;QD=32.87;SOR=1.022;VQSLOD=6.35;culprit=FS;ANN=A|sequence_feature|MODERATE|COPS4|COPS4|modified-residue:N6-acetyllysine|NM_016129.2|protein_coding||c.74+961_74+962delCC||||||,A|intron_variant|MODIFIER|COPS4|COPS4|transcript|NM_016129.2|protein_coding|1/9|c.74+970_74+971delCC||||||INFO_REALIGN_3_PRIME	GT:AD:DP:GQ:PL	1/1/1:0,49:49:86:1787,232,86,0
4	146753453	rs377709926	CCACA	C,CCACACACA	1353.6	PASS	AC=2,1;AF=0.667,0.333;AN=3;DB;DP=45;FS=0.000;MLEAC=1,1;MLEAF=0.333,0.333;MQ=59.12;MQ0=0;QD=26.67;SOR=0.693;VQSLOD=5.30;culprit=FS;ANN=C|sequence_feature|MODERATE|ZNF827|ZNF827|modified-residue:phosphoserine|NM_001306215.1|protein_coding||c.2280-8780_2280-8777delTGTG||||||,CCACACACA|sequence_feature|MODERATE|ZNF827|ZNF827|modified-residue:phosphoserine|NM_001306215.1|protein_coding||c.2280-8784_22…	GT:AD:DP:GQ:PL	1/1/2:0,29,6:35:56:1378,316,241,277,1137,74,0,1119,56,1109
5	68494775	rs11330266	CA	C	233.39	PASS	AC=1;AF=0.333;AN=3;BaseQRankSum=0.643;ClippingRankSum=0.000;DB;DP=45;FS=7.555;MLEAC=1;MLEAF=0.333;MQ=60.24;MQ0=0;MQRankSum=1.212;POSITIVE_TRAIN_SITE;QD=6.31;ReadPosRankSum=1.111;SOR=1.346;VQSLOD=1.66;culprit=FS;ANN=C|sequence_feature|MODERATE|CENPH|CENPH|modified-residue:phosphoserine|NM_022909.3|protein_coding||c.371+1840delA||||||,C|intron_variant|MODIFIER|CENPH|CENPH|transcript|NM_022909.3|pro…	GT:AD:DP:GQ:PL	0/0/1:20,17:37:10:269,0,10,408
5	75708981	.	C	CTTTTTTTTTTT	139.88	PASS	AC=3;AF=1.00;AN=3;DP=20;FS=0.000;MLEAC=3;MLEAF=1.00;MQ=60.00;MQ0=0;POSITIVE_TRAIN_SITE;QD=34.97;SOR=3.258;VQSLOD=6.33;culprit=QD;ANN=CTTTTTTTTTTT|sequence_feature|MODERATE|IQGAP2|IQGAP2|modified-residue:Phosphoserine|NM_006633.3|protein_coding||c.46+9565_46+9566insTTTTTTTTTTT||||||,CTTTTTTTTTTT|intron_variant|MODIFIER|IQGAP2|IQGAP2|transcript|NM_006633.3|protein_coding|1/35|c.46+9585_46+9595dupTT…	GT:AD:DP:GQ:PL	1/1/1:0,4:4:5:175,16,5,0
5	75709445	rs139606187	TGG	T	1297.6	PASS	AC=1;AF=0.333;AN=3;BaseQRankSum=0.401;ClippingRankSum=0.000;DB;DP=86;FS=1.942;MLEAC=1;MLEAF=0.333;MQ=60.13;MQ0=0;MQRankSum=1.179;POSITIVE_TRAIN_SITE;QD=15.45;ReadPosRankSum=0.240;SOR=0.955;VQSLOD=2.74;culprit=DP;ANN=T|sequence_feature|MODERATE|IQGAP2|IQGAP2|modified-residue:Phosphoserine|NM_006633.3|protein_coding||c.46+10030_46+10031delGG||||||,T|intron_variant|MODIFIER|IQGAP2|IQGAP2|transcript|…	GT:AD:DP:GQ:PL	0/0/1:48,36:84:36:1334,0,36,1895
5	75725685	rs56031811	GACAC	G	856.12	PASS	AC=1;AF=0.333;AN=3;BaseQRankSum=1.625;ClippingRankSum=0.000;DB;DP=63;FS=0.000;MLEAC=1;MLEAF=0.333;MQ=59.62;MQ0=0;MQRankSum=-0.979;QD=18.22;ReadPosRankSum=0.245;SOR=0.631;VQSLOD=2.79;culprit=FS;ANN=G|sequence_feature|MODERATE|IQGAP2|IQGAP2|modified-residue:Phosphoserine|NM_006633.3|protein_coding||c.46+26270_46+26273delACAC||||||,G|intron_variant|MODIFIER|IQGAP2|IQGAP2|transcript|NM_006633.3|prote…	GT:AD:DP:GQ:PL	0/0/1:24,23:47:2:883,0,2,1029
5	75727953	.	CTTT	C	33.12	PASS	AC=1;AF=0.333;AN=3;BaseQRankSum=1.068;ClippingRankSum=0.000;DP=13;FS=8.451;MLEAC=1;MLEAF=0.333;MQ=60.00;MQ0=0;MQRankSum=0.000;QD=4.73;ReadPosRankSum=1.068;SOR=2.215;VQSLOD=0.104;culprit=FS;ANN=C|sequence_feature|MODERATE|IQGAP2|IQGAP2|modified-residue:Phosphoserine|NM_006633.3|protein_coding||c.46+28538_46+28540delTTT||||||,C|intron_variant|MODIFIER|IQGAP2|IQGAP2|transcript|NM_006633.3|protein_co…	GT:AD:DP:GQ:PL	0/0/1:5,2:7:9:69,0,9,174
5	75733863	rs70982608	T	TG	100.93	PASS	AC=1;AF=0.333;AN=3;BaseQRankSum=-0.365;ClippingRankSum=0.000;DB;DP=18;FS=0.000;MLEAC=1;MLEAF=0.333;MQ=53.12;MQ0=0;MQRankSum=0.473;QD=7.21;ReadPosRankSum=1.097;SOR=0.693;VQSLOD=3.50;culprit=QD;ANN=TG|sequence_feature|MODERATE|IQGAP2|IQGAP2|modified-residue:Phosphoserine|NM_006633.3|protein_coding||c.47-23532_47-23531insG||||||,TG|intron_variant|MODIFIER|IQGAP2|IQGAP2|transcript|NM_006633.3|protein…	GT:AD:DP:GQ:PL	0/0/1:9,5:14:12:137,0,12,275
5	75751278	.	C	CAAA	60.25	PASS	AC=2;AF=0.667;AN=3;DP=21;FS=0.000;MLEAC=2;MLEAF=0.667;MQ=57.85;MQ0=0;QD=15.06;SOR=2.833;VQSLOD=3.49;culprit=FS;ANN=CAAA|sequence_feature|MODERATE|IQGAP2|IQGAP2|modified-residue:Phosphoserine|NM_006633.3|protein_coding||c.47-6117_47-6116insAAA||||||,CAAA|intron_variant|MODIFIER|IQGAP2|IQGAP2|transcript|NM_006633.3|protein_coding|1/35|c.47-6097_47-6095dupAAA||||||INFO_REALIGN_3_PRIME	GT:AD:DP:GQ:PL	0/1/1:1,3:4:5:73,5,0,5
5	77406508	.	CTGTG	C,CTGTGTG	1487.37	PASS	AC=1,1;AF=0.333,0.333;AN=3;BaseQRankSum=0.083;ClippingRankSum=0.000;DP=73;FS=0.000;MLEAC=1,1;MLEAF=0.333,0.333;MQ=60.00;MQ0=0;MQRankSum=0.000;QD=26.56;ReadPosRankSum=1.897;SOR=0.900;VQSLOD=3.01;culprit=FS;ANN=C|sequence_feature|MODERATE|AP3B1|AP3B1|modified-residue:Phosphoserine|NM_003664.4|protein_coding||c.2250-334_2250-331delCACA||||||,CTGTGTG|sequence_feature|MODERATE|AP3B1|AP3B1|modified-res…	GT:AD:DP:GQ:PL	0/1/2:4,21,31:56:3:1522,837,880,1387,729,0,49,655,3,722
5	78108415	rs138820595	A	AACAC,AACACAC	1315.6	PASS	AC=1,2;AF=0.333,0.667;AN=3;DB;DP=48;FS=0.000;MLEAC=1,1;MLEAF=0.333,0.333;MQ=59.56;MQ0=0;POSITIVE_TRAIN_SITE;QD=29.76;SOR=1.179;VQSLOD=6.01;culprit=FS;ANN=AACAC|sequence_feature|MODERATE|ARSB|ARSB|disulfide-bond:experimental_evidence_used_in_manual_assertion|NM_000046.3|protein_coding||c.1213+26760_1213+26763dupGTGT||||||,AACACAC|sequence_feature|MODERATE|ARSB|ARSB|disulfide-bond:experimental_evid…	GT:AD:DP:GQ:PL	1/2/2:0,12,19:31:8:1325,507,415,362,501,49,8,437,0,462
5	78130426	.	A	ATGTG	279.12	PASS	AC=2;AF=0.667;AN=3;BaseQRankSum=-1.633;ClippingRankSum=0.000;DP=16;FS=2.276;MLEAC=2;MLEAF=0.667;MQ=60.00;MQ0=0;MQRankSum=0.000;QD=21.47;ReadPosRankSum=2.256;SOR=1.034;VQSLOD=0.176;culprit=ReadPosRankSum;ANN=ATGTG|sequence_feature|MODERATE|ARSB|ARSB|disulfide-bond:experimental_evidence_used_in_manual_assertion|NM_000046.3|protein_coding||c.1213+4749_1213+4752dupCACA||||||,ATGTG|intron_variant|MODI…	GT:AD:DP:GQ:PL	0/1/1:5,8:13:9:315,9,0,216
5	130524102	rs71786523	T	TA	63.61	PASS	AC=1;AF=0.333;AN=3;BaseQRankSum=-1.456;ClippingRankSum=0.000;DB;DP=39;FS=3.090;MLEAC=1;MLEAF=0.333;MQ=60.55;MQ0=0;MQRankSum=0.000;QD=3.53;ReadPosRankSum=0.191;SOR=0.132;VQSLOD=1.05;culprit=QD;ANN=TA|sequence_feature|MODERATE|LYRM7|LYRM7|cross-link:Glycyl_lysine_isopeptide_(Lys-Gly)_(interchain_with_G-Cter_in_ubiquitin)|NM_181705.3|protein_coding||c.244+1300_244+1301insA||||||,TA|intron_variant|MO…	GT:AD:DP:GQ:PL	0/0/1:12,6:18:15:68,0,15,148
5	175811094	rs56989856	C	CAT,CGT	2734.6	PASS	AC=1,2;AF=0.333,0.667;AN=3;DB;DP=79;FS=0.000;MLEAC=1,2;MLEAF=0.333,0.667;MQ=60.00;MQ0=0;QD=35.55;SOR=1.195;VQSLOD=5.14;culprit=QD;ANN=CAT|frameshift_variant|HIGH|NOP16|NOP16|transcript|NM_001256539.3|protein_coding|5/5|c.586_587insAT|p.Arg196fs|974/1129|586/697|196/231||WARNING_TRANSCRIPT_INCOMPLETE,CGT|frameshift_variant|HIGH|NOP16|NOP16|transcript|NM_001256539.3|protein_coding|5/5|c.585_586dupA…	GT:AD:DP:GQ:PL	1/2/2:0,28,43:71:64:2771,1347,1185,1249,1034,130,64,834,0,715
6	7392749	.	C	CT	77.16	PASS	AC=1;AF=0.250;AN=4;BaseQRankSum=0.084;ClippingRankSum=0.980;DP=45;FS=1.840;MLEAC=1;MLEAF=0.250;MQ=60.00;MQ0=0;MQRankSum=-0.756;QD=2.41;ReadPosRankSum=1.654;SOR=1.329;VQSLOD=0.199;culprit=QD;ANN=CT|sequence_feature|MODERATE|RIOK1|RIOK1|modified-residue:phosphoserine|NM_031480.2|protein_coding||c.72-583_72-582insT||||||,CT|upstream_gene_variant|MODIFIER|CAGE1|CAGE1|transcript|NM_001170692.1|protein…	GT:AD:DP:GQ:PL	0/0/0/1:26,6:32:26:80,0,26,88,447
6	42977079	.	A	AT	711.16	PASS	AC=1;AF=0.250;AN=4;BaseQRankSum=-0.647;ClippingRankSum=-0.003;DP=112;FS=2.831;MLEAC=1;MLEAF=0.250;MQ=60.00;MQ0=0;MQRankSum=0.402;QD=6.41;ReadPosRankSum=1.285;SOR=0.658;VQSLOD=0.545;culprit=DP;ANN=AT|frameshift_variant|HIGH|PPP2R5D|PPP2R5D|transcript|NM_006245.3|protein_coding|12/16|c.1273dupT|p.Tyr425fs|1453/3047|1274/1809|425/602||INFO_REALIGN_3_PRIME,AT|upstream_gene_variant|MODIFIER|KLHDC3|KLH…	GT:AD:DP:GQ:PL	0/0/0/1:81,30:111:52:747,0,52,243,2589
6	51661615	rs35774390	A	ATT	236.33	PASS	AC=4;AF=1.00;AN=4;DB;DP=18;FS=0.000;MLEAC=3;MLEAF=0.750;MQ=60.10;MQ0=0;QD=29.54;SOR=2.303;VQSLOD=4.56;culprit=FS;ANN=ATT|sequence_feature|MODERATE|PKHD1|PKHD1|glycosylation-site:N-linked_(GlcNAc...)|NM_138694.3|protein_coding||c.8303-5446_8303-5445dupAA||||||,ATT|intron_variant|MODIFIER|PKHD1|PKHD1|transcript|NM_138694.3|protein_coding|52/66|c.8303-5446_8303-5445dupAA||||||	GT:AD:DP:GQ:PL	1/1/1/1:0,8:8:12:261,55,28,12,0
6	51663957	rs3062503	C	CCA	2627.16	PASS	AC=4;AF=1.00;AN=4;BaseQRankSum=0.280;ClippingRankSum=-1.299;DB;DP=87;FS=0.000;MLEAC=4;MLEAF=1.00;MQ=60.00;MQ0=0;MQRankSum=0.181;POSITIVE_TRAIN_SITE;QD=34.75;ReadPosRankSum=0.510;SOR=0.898;VQSLOD=4.86;culprit=FS;ANN=CCA|sequence_feature|MODERATE|PKHD1|PKHD1|glycosylation-site:N-linked_(GlcNAc...)|NM_138694.3|protein_coding||c.8303-7788_8303-7787dupTG||||||,CCA|intron_variant|MODIFIER|PKHD1|PKHD1|t…	GT:AD:DP:GQ:PL	1/1/1/1:2,73:75:33:2663,381,159,33,0
6	51666437	rs140197286	T	TTGTGTGTGTGTGTGTGTGTGTGTG	1398.16	PASS	AC=4;AF=1.00;AN=4;DB;DP=47;FS=0.000;MLEAC=2;MLEAF=0.500;MQ=59.24;MQ0=0;QD=29.75;SOR=3.442;VQSLOD=5.33;culprit=FS;ANN=TTGTGTGTGTGTGTGTGTGTGTGTG|sequence_feature|MODERATE|PKHD1|PKHD1|glycosylation-site:N-linked_(GlcNAc...)|NM_138694.3|protein_coding||c.8303-10267_8303-10266insCACACACACACACACACACACACA||||||,TTGTGTGTGTGTGTGTGTGTGTGTG|intron_variant|MODIFIER|PKHD1|PKHD1|transcript|NM_138694.3|protein_…	GT:AD:DP:GQ:PL	1/1/1/1:0,31:31:40:1346,194,97,40,0
6	51672250	.	AAAAAAAATAT	A	1022.16	PASS	AC=4;AF=1.00;AN=4;DP=25;FS=0.000;MLEAC=4;MLEAF=1.00;MQ=60.00;MQ0=0;QD=25.80;SOR=2.494;VQSLOD=4.95;culprit=FS;ANN=A|sequence_feature|MODERATE|PKHD1|PKHD1|glycosylation-site:N-linked_(GlcNAc...)|NM_138694.3|protein_coding||c.8303-16089_8303-16080delATATTTTTTT||||||,A|intron_variant|MODIFIER|PKHD1|PKHD1|transcript|NM_138694.3|protein_coding|52/66|c.8303-16089_8303-16080delATATTTTTTT||||||	GT:AD:DP:GQ:PL	1/1/1/1:0,24:24:31:1058,150,75,31,0
6	51674657	rs58099493	AT	A	1527.16	PASS	AC=4;AF=1.00;AN=4;DB;DP=40;FS=0.000;MLEAC=4;MLEAF=1.00;MQ=60.00;MQ0=0;POSITIVE_TRAIN_SITE;QD=32.90;SOR=3.912;VQSLOD=6.83;culprit=FS;ANN=A|sequence_feature|MODERATE|PKHD1|PKHD1|glycosylation-site:N-linked_(GlcNAc...)|NM_138694.3|protein_coding||c.8303-18487delA||||||,A|intron_variant|MODIFIER|PKHD1|PKHD1|transcript|NM_138694.3|protein_coding|52/66|c.8303-18487delA||||||	GT:AD:DP:GQ:PL	1/1/1/1:0,38:38:47:1563,229,114,47,0
7	4785103	rs111622709	T	TTG	2395.6	PASS	AC=3;AF=1.00;AN=3;DB;DP=73;FS=0.000;MLEAC=3;MLEAF=1.00;MQ=60.44;MQ0=0;POSITIVE_TRAIN_SITE;QD=30.06;SOR=1.352;VQSLOD=6.74;culprit=FS;ANN=TTG|sequence_feature|MODERATE|FOXK1|FOXK1|modified-residue:phosphoserine|NM_001037165.1|protein_coding||c.746+4449_746+4450insTG||||||,TTG|intron_variant|MODIFIER|FOXK1|FOXK1|transcript|NM_001037165.1|protein_coding|2/8|c.746+4465_746+4466dupGT||||||INFO_REALIGN_…	GT:AD:DP:GQ:PL	1/1/1:0,68:68:99:2432,324,120,0
7	15725797	rs113582077	ATGG	A	634.6	PASS	AC=1;AF=0.333;AN=3;BaseQRankSum=0.777;ClippingRankSum=0.458;DB;DP=57;FS=1.234;MLEAC=1;MLEAF=0.333;MQ=59.54;MQ0=0;MQRankSum=0.117;QD=13.22;ReadPosRankSum=-0.449;SOR=1.085;VQSLOD=1.13;culprit=QD;ANN=A|disruptive_inframe_deletion|MODERATE|MEOX2|MEOX2|transcript|NM_005924.4|protein_coding|1/3|c.228_230delCCA|p.His77del|511/2371|228/915|76/304||,A|upstream_gene_variant|MODIFIER|MEOX2-AS1|MEOX2-AS1|tra…	GT:AD:DP:GQ:PL	0/0/1:30,18:48:36:671,0,36,1134
7	42967505	rs10625370	C	CAA	988.6	PASS	AC=3;AF=1.00;AN=3;DB;DP=33;FS=0.000;MLEAC=2;MLEAF=0.667;MQ=60.98;MQ0=0;POSITIVE_TRAIN_SITE;QD=34.09;SOR=0.941;VQSLOD=5.05;culprit=FS;ANN=CAA|sequence_feature|MODERATE|PSMA2|PSMA2|modified-residue:phosphoserine|NM_002787.4|protein_coding||c.42-449_42-448dupTT||||||,CAA|upstream_gene_variant|MODIFIER|MRPL32|MRPL32|transcript|NM_031903.2|protein_coding||c.-4481_-4480insAA|||||4433|,CAA|intron_varian…	GT:AD:DP:GQ:PL	1/1/1:0,29:29:53:1014,143,53,0
7	42969805	rs147782913	AAC	A	1950.6	PASS	AC=3;AF=1.00;AN=3;BaseQRankSum=-0.029;ClippingRankSum=-1.086;DB;DP=67;FS=0.000;MLEAC=3;MLEAF=1.00;MQ=60.96;MQ0=0;MQRankSum=0.206;QD=31.98;ReadPosRankSum=-0.264;SOR=0.399;VQSLOD=5.42;culprit=FS;ANN=A|sequence_feature|MODERATE|PSMA2|PSMA2|modified-residue:phosphoserine|NM_002787.4|protein_coding||c.41+1910_41+1911delGT||||||,A|upstream_gene_variant|MODIFIER|MRPL32|MRPL32|transcript|NM_031903.2|prot…	GT:AD:DP:GQ:PL	1/1/1:1,60:61:73:1987,249,73,0
7	72719459	.	C	CTTTTT	35.1	PASS	AC=1;AF=0.250;AN=4;BaseQRankSum=0.719;ClippingRankSum=0.000;DP=35;FS=7.782;MLEAC=1;MLEAF=0.250;MQ=59.13;MQ0=0;MQRankSum=0.549;QD=3.19;ReadPosRankSum=-0.282;SOR=2.225;VQSLOD=0.370;culprit=FS;ANN=CTTTTT|sequence_feature|MODERATE|NSUN5|NSUN5|modified-residue:phosphoserine|NM_001168347.2|protein_coding||c.501-370_501-366dupAAAAA||||||,CTTTTT|intron_variant|MODIFIER|NSUN5|NSUN5|transcript|NM_001168347…	GT:AD:DP:GQ:PL	0/0/0/1:8,3:11:7:66,0,7,25,291
7	74119885	.	C	CT	201.57	PASS	AC=3;AF=0.750;AN=4;BaseQRankSum=0.328;ClippingRankSum=0.000;DP=26;FS=0.000;MLEAC=3;MLEAF=0.750;MQ=58.27;MQ0=0;MQRankSum=0.000;QD=14.40;ReadPosRankSum=-0.546;SOR=1.179;VQSLOD=3.55;culprit=FS;ANN=CT|sequence_feature|MODERATE|GTF2I|GTF2I|modified-residue:phosphoserine|NM_032999.3|protein_coding||c.641+335_641+336insT||||||,CT|intron_variant|MODIFIER|GTF2I|GTF2I|transcript|NM_032999.3|protein_coding|…	GT:AD:DP:GQ:PL	0/1/1/1:3,11:14:10:237,38,10,0,38
7	77253583	.	CAA	C	96.35	PASS	AC=1;AF=0.250;AN=4;BaseQRankSum=-1.036;ClippingRankSum=0.000;DP=35;FS=0.000;MLEAC=1;MLEAF=0.250;MQ=60.00;MQ0=0;MQRankSum=0.000;QD=4.38;ReadPosRankSum=0.220;SOR=0.693;VQSLOD=2.99;culprit=FS;ANN=C|sequence_feature|MODERATE|PTPN12|PTPN12|modified-residue:phosphoserine|NM_002835.3|protein_coding||c.1026-2438_1026-2437delAA||||||,C|intron_variant|MODIFIER|PTPN12|PTPN12|transcript|NM_002835.3|protein_c…	GT:AD:DP:GQ:PL	0/0/0/1:16,6:22:9:131,0,9,44,472
7	77254789	.	G	GCTCGCGCGCGCT	75.27	PASS	AC=4;AF=1.00;AN=4;DP=27;FS=0.000;MLEAC=4;MLEAF=1.00;MQ=59.52;MQ0=0;QD=15.05;SOR=3.611;VQSLOD=2.83;culprit=FS;ANN=GCTCGCGCGCGCT|sequence_feature|MODERATE|PTPN12|PTPN12|modified-residue:phosphoserine|NM_002835.3|protein_coding||c.1026-1233_1026-1232insCTCGCGCGCGCT||||||,GCTCGCGCGCGCT|intron_variant|MODIFIER|PTPN12|PTPN12|transcript|NM_002835.3|protein_coding|12/17|c.1026-1230_1026-1229insGCGCGCGCTC…	GT:AD:DP:GQ:PL	1/1/1/1:0,5:5:6:110,27,14,6,0
7	86575475	.	TCA	T	73.16	PASS	AC=1;AF=0.250;AN=4;BaseQRankSum=-0.160;ClippingRankSum=0.000;DP=114;FS=1.462;MLEAC=1;MLEAF=0.250;MQ=60.00;MQ0=0;MQRankSum=0.000;QD=0.78;ReadPosRankSum=0.933;SOR=1.152;VQSLOD=0.141;culprit=QD;ANN=T|sequence_feature|MODERATE|KIAA1324L|KIAA1324L|glycosylation-site:N-linked_(GlcNAc...)|NM_001142749.2|protein_coding||c.507-1115_507-1114delTG||||||,T|intron_variant|MODIFIER|KIAA1324L|KIAA1324L|transcri…	GT:AD:DP:GQ:PL	0/0/0/1:86,8:94:99:109,0,127,371,2567
7	97934359	.	G	GTTTTTTT	85.84	PASS	AC=4;AF=1.00;AN=4;DP=22;FS=0.000;MLEAC=4;MLEAF=1.00;MQ=58.86;MQ0=0;QD=12.26;SOR=1.022;VQSLOD=3.49;culprit=FS;ANN=GTTTTTTT|sequence_feature|MODERATE|BAIAP2L1|BAIAP2L1|modified-residue:Phosphoserine|NM_018842.4|protein_coding||c.1242-678_1242-672dupAAAAAAA||||||,GTTTTTTT|intron_variant|MODIFIER|BAIAP2L1|BAIAP2L1|transcript|NM_018842.4|protein_coding|11/13|c.1242-678_1242-672dupAAAAAAA||||||	GT:AD:DP:GQ:PL	1/1/1/1:0,7:7:7:119,33,17,7,0
7	107795532	.	C	CATATATAT,CATATATATAT	821.57	PASS	AC=1,2;AF=0.200,0.400;AN=5;BaseQRankSum=1.068;ClippingRankSum=-1.068;DP=79;FS=17.649;MLEAC=1,1;MLEAF=0.200,0.200;MQ=62.02;MQ0=0;MQRankSum=-1.341;POSITIVE_TRAIN_SITE;QD=26.50;ReadPosRankSum=-0.794;SOR=2.219;VQSLOD=0.154;culprit=FS;ANN=CATATATAT|sequence_feature|MODERATE|NRCAM|NRCAM|modified-residue:Phosphoserine|NM_001037132.2|protein_coding||c.3677+4368_3677+4375dupATATATAT||||||,CATATATATAT|sequ…	GT:AD:DP:GQ:PL	0/0/1/2/2:11,10,10:31:1:841,242,192,178,191,633,258,15,1,18,443,207,0,4,424,191,16,423,202,439,621
7	134614372	.	C	CACACATATATGTAT	349.23	PASS	AC=3;AF=0.600;AN=5;DP=16;FS=0.000;MLEAC=1;MLEAF=0.200;MQ=54.56;MQ0=0;QD=29.44;SOR=0.693;VQSLOD=4.53;culprit=FS;ANN=CACACATATATGTAT|sequence_feature|MODERATE|CALD1|CALD1|modified-residue:phosphoserine|NM_033138.3|protein_coding||c.218+721_218+722insACACATATATGTAT||||||,CACACATATATGTAT|intron_variant|MODIFIER|CALD1|CALD1|transcript|NM_033138.3|protein_coding|4/14|c.218+721_218+722insACACATATATGTAT|…	GT:AD:DP:GQ:PL	0/0/1/1/1:1,6:7:5:322,26,5,0,6,123
7	134614375	.	G	GTATATATACACACACATATACACACA	43.34	PASS	AC=2;AF=0.400;AN=5;BaseQRankSum=-1.026;ClippingRankSum=0.000;DP=14;FS=0.000;MLEAC=2;MLEAF=0.400;MQ=50.20;MQ0=0;MQRankSum=-1.026;QD=10.83;ReadPosRankSum=-1.026;SOR=0.693;VQSLOD=1.86;culprit=FS;ANN=GTATATATACACACACATATACACACA|sequence_feature|MODERATE|CALD1|CALD1|modified-residue:phosphoserine|NM_033138.3|protein_coding||c.218+724_218+725insTATATATACACACACATATACACACA||||||,GTATATATACACACACATATACACA…	GT:AD:DP:GQ:PL	0/0/0/1/1:2,2:4:2:75,2,0,2,9,98
7	141334630	.	C	CT	147.42	PASS	AC=2;AF=0.400;AN=5;BaseQRankSum=0.817;ClippingRankSum=0.036;DP=31;FS=0.000;MLEAC=2;MLEAF=0.400;MQ=60.00;MQ0=0;MQRankSum=0.533;QD=6.14;ReadPosRankSum=-0.391;SOR=0.760;VQSLOD=3.52;culprit=FS;ANN=CT|sequence_feature|MODERATE|AGK|AGK|cross-link:Glycyl_lysine_isopeptide_(Lys-Gly)_(interchain_with_G-Cter_in_ubiquitin)|NM_018238.3|protein_coding||c.668+850_668+851insT||||||,CT|intron_variant|MODIFIER|AG…	GT:AD:DP:GQ:PL	0/0/0/1/1:15,9:24:8:153,9,0,8,36,187
8	10467637	.	T	TCCTCTAACTGCACCCTCTCTTCTTGCAGCCCTTCTATTACTTTAGTCC	335.6	PASS	AC=1;AF=0.333;AN=3;BaseQRankSum=1.671;ClippingRankSum=0.000;DP=32;FS=1.702;MLEAC=1;MLEAF=0.333;MQ=59.17;MQ0=0;MQRankSum=0.832;QD=10.83;ReadPosRankSum=-2.714;SOR=1.148;VQSLOD=-3.508e-01;culprit=ReadPosRankSum;ANN=TCCTCTAACTGCACCCTCTCTTCTTGCAGCCCTTCTATTACTTTAGTCC|conservative_inframe_insertion|MODERATE|RP1L1|RP1L1|transcript|NM_178857.5|protein_coding|4/4|c.3970_3971insGGACTAAAGTAATAGAAGGGCTGCAAGAA…	GT:AD:DP:GQ:PL	0/0/1:24,7:31:39:372,0,39,921
8	22468901	rs145362940	A	ATGTGTGTG,ATATGTGTGTGTGTGTG	937.6	PASS	AC=2,1;AF=0.667,0.333;AN=3;DB;DP=25;FS=0.000;MLEAC=2,1;MLEAF=0.667,0.333;MQ=58.95;MQ0=0;POSITIVE_TRAIN_SITE;QD=33.20;SOR=1.329;VQSLOD=6.64;culprit=FS;ANN=ATGTGTGTG|sequence_feature|MODERATE|CCAR2|CCAR2|modified-residue:phosphoserine|NM_021174.5|protein_coding||c.585-1629_585-1628insTGTGTGTG||||||,ATATGTGTGTGTGTGTG|sequence_feature|MODERATE|CCAR2|CCAR2|modified-residue:phosphoserine|NM_021174.5|pr…	GT:AD:DP:GQ:PL	1/1/2:0,15,5:20:35:974,290,238,208,627,48,0,609,35,645
8	27977089	.	TTATATATATATATA	T	268.71	PASS	AC=3;AF=1.00;AN=3;DP=21;FS=0.000;MLEAC=3;MLEAF=1.00;MQ=59.23;MQ0=0;POSITIVE_TRAIN_SITE;QD=33.59;SOR=1.863;VQSLOD=6.01;culprit=FS;ANN=T|sequence_feature|MODERATE|ELP3|ELP3|cross-link:Glycyl_lysine_isopeptide_(Lys-Gly)_(interchain_with_G-Cter_in_ubiquitin)|NM_018091.5|protein_coding||c.617+6400_617+6413delTATATATATATATA||||||,T|intron_variant|MODIFIER|ELP3|ELP3|transcript|NM_018091.5|protein_coding…	GT:AD:DP:GQ:PL	1/1/1:0,8:8:16:305,41,16,0
8	27981345	rs113686962	G	GTCACAGCC	1236.6	PASS	AC=1;AF=0.333;AN=3;BaseQRankSum=0.579;ClippingRankSum=0.000;DB;DP=83;FS=11.696;MLEAC=1;MLEAF=0.333;MQ=60.00;MQ0=0;MQRankSum=0.000;POSITIVE_TRAIN_SITE;QD=15.08;ReadPosRankSum=-1.709;SOR=1.271;VQSLOD=0.518;culprit=FS;ANN=GTCACAGCC|sequence_feature|MODERATE|ELP3|ELP3|cross-link:Glycyl_lysine_isopeptide_(Lys-Gly)_(interchain_with_G-Cter_in_ubiquitin)|NM_018091.5|protein_coding||c.618-5674_618-5673ins…	GT:AD:DP:GQ:PL	0/0/1:51,31:82:52:1273,0,52,4984
8	42184848	.	C	CTTT	119.26	PASS	AC=3;AF=1.00;AN=3;DP=25;FS=0.000;MLEAC=3;MLEAF=1.00;MQ=60.00;MQ0=0;POSITIVE_TRAIN_SITE;QD=23.85;SOR=1.981;VQSLOD=5.86;culprit=FS;ANN=CTTT|sequence_feature|MODERATE|IKBKB|IKBKB|modified-residue:Phosphoserine|NM_001556.2|protein_coding||c.2114+1233_2114+1234insTTT||||||,CTTT|intron_variant|MODIFIER|IKBKB|IKBKB|transcript|NM_001556.2|protein_coding|20/21|c.2114+1252_2114+1254dupTTT||||||INFO_REALIGN…	GT:AD:DP:GQ:PL	1/1/1:0,5:5:8:154,22,8,0
8	65494007	.	T	TAGCGGC	1173.6	PASS	AC=2;AF=0.667;AN=3;BaseQRankSum=-0.249;ClippingRankSum=0.000;DP=49;FS=6.439;MLEAC=2;MLEAF=0.667;MQ=61.55;MQ0=0;MQRankSum=1.529;QD=24.97;ReadPosRankSum=-0.663;SOR=0.810;VQSLOD=0.297;culprit=FS;ANN=TAGCGGC|conservative_inframe_insertion|MODERATE|BHLHE22|BHLHE22|transcript|NM_152414.4|protein_coding|1/1|c.667_672dupAGCGGC|p.Ser223_Gly224dup|1226/3397|673/1146|225/381||INFO_REALIGN_3_PRIME,TAGCGGC|up…	GT:AD:DP:GQ:PL	0/1/1:16,31:47:45:1210,45,0,986
8	98788165	.	C	CGGCGGGCTCCAGGCGA	550.6	PASS	AC=1;AF=0.333;AN=3;BaseQRankSum=0.625;ClippingRankSum=0.000;DP=58;FS=1.204;MLEAC=1;MLEAF=0.333;MQ=59.90;MQ0=0;MQRankSum=-1.391;QD=11.97;ReadPosRankSum=-0.902;SOR=0.511;VQSLOD=-2.590e-01;culprit=MQRankSum;ANN=CGGCGGGCTCCAGGCGA|frameshift_variant|HIGH|LAPTM4B|LAPTM4B|transcript|NM_018407.4|protein_coding|1/7|c.207_222dupGCTCCAGGCGAGGCGG|p.Ser75fs|379/2238|223/954|75/317||INFO_REALIGN_3_PRIME;LOF=(L…	GT:AD:DP:GQ:PL	0/0/1:31,15:46:46:587,0,46,4301
9	12775861	.	T	TGGCGGC	1294.73	PASS	AC=2;AF=1.00;AN=2;DP=36;ExcessHet=3.0103;FS=0.000;MLEAC=2;MLEAF=1.00;MQ=59.20;MQ0=0;QD=26.95;SOR=0.906;VQSLOD=5.12;culprit=FS;ANN=TGGCGGC|conservative_inframe_insertion|MODERATE|LURAP1L|LURAP1L|transcript|NM_203403.1|protein_coding|1/2|c.160_165dupGGCGGC|p.Gly54_Gly55dup|869/2690|166/687|56/228||INFO_REALIGN_3_PRIME,TGGCGGC|intron_variant|MODIFIER|LURAP1L-AS1|LURAP1L-AS1|transcript|NR_125775.1|ps…	GT:AD:DP:GQ:PL	1/1:0,29:29:90:1332,90,0
9	35270336	rs10608383	ATGTG	A	1745.73	PASS	AC=2;AF=1.00;AN=2;DB;DP=48;ExcessHet=3.0103;FS=0.000;MLEAC=2;MLEAF=1.00;MQ=60.45;MQ0=0;POSITIVE_TRAIN_SITE;QD=30.40;SOR=0.843;VQSLOD=6.76;culprit=FS;ANN=A|sequence_feature|MODERATE|UNC13B|UNC13B|modified-residue:phosphoserine|NM_006377.3|protein_coding||c.526+11290_526+11293delTGTG||||||,A|intron_variant|MODIFIER|UNC13B|UNC13B|transcript|NM_006377.3|protein_coding|7/38|c.526+11309_526+11312delGTG…	GT:AD:DP:GQ:PL	1/1:0,41:41:99:1783,124,0
9	35309219	rs5897599	AGTGT	A	1376.73	PASS	AC=2;AF=1.00;AN=2;DB;DP=45;ExcessHet=3.0103;FS=0.000;MLEAC=2;MLEAF=1.00;MQ=60.00;MQ0=0;POSITIVE_TRAIN_SITE;QD=27.91;SOR=1.765;VQSLOD=5.99;culprit=FS;ANN=A|sequence_feature|MODERATE|UNC13B|UNC13B|modified-residue:phosphoserine|NM_006377.3|protein_coding||c.762-1244_762-1241delGTGT||||||,A|intron_variant|MODIFIER|UNC13B|UNC13B|transcript|NM_006377.3|protein_coding|8/38|c.762-1206_762-1203delGTGT|||…	GT:AD:DP:GQ:PL	1/1:0,34:34:99:1411,101,0
9	78943891	rs59466685	A	ATTTTTTTTT,ATTTTTTTTTTTTTTT	334.73	PASS	AC=1,1;AF=0.500,0.500;AN=2;DB;DP=10;ExcessHet=3.0103;FS=0.000;MLEAC=1,1;MLEAF=0.500,0.500;MQ=63.17;MQ0=0;QD=30.04;SOR=2.303;VQSLOD=3.95;culprit=FS;ANN=ATTTTTTTTT|sequence_feature|MODERATE|PCSK5|PCSK5|glycosylation-site:N-linked_(GlcNAc...)|NM_001190482.1|protein_coding||c.4489+736_4489+737insTTTTTTTTT||||||,ATTTTTTTTTTTTTTT|sequence_feature|MODERATE|PCSK5|PCSK5|glycosylation-site:N-linked_(GlcNAc…	GT:AD:DP:GQ:PL	1/2:0,0,2:2:77:372,98,77,99,0,79
9	102797351	.	TAAGTC	T	2892.6	PASS	AC=3;AF=1.00;AN=3;DP=68;FS=0.000;MLEAC=3;MLEAF=1.00;MQ=60.95;MQ0=0;QD=28.61;SOR=1.828;VQSLOD=5.24;culprit=FS;ANN=T|sequence_feature|MODERATE|ERP44|ERP44|modified-residue:phosphoserine|NM_015051.2|protein_coding||c.287-12848_287-12844delGACTT||||||,T|sequence_feature|LOW|ERP44|ERP44|helix:combinatorial_evidence_used_in_manual_assertion|NM_015051.2|protein_coding||c.287-12848_287-12844delGACTT|||||…	GT:AD:DP:GQ:PL	1/1/1:0,67:67:99:2929,320,118,0
10	5828128	.	A	ATT	114.73	PASS	AC=2;AF=0.667;AN=3;BaseQRankSum=-0.967;ClippingRankSum=0.000;DP=25;FS=0.000;MLEAC=1;MLEAF=0.333;MQ=60.00;MQ0=0;MQRankSum=0.000;QD=19.12;ReadPosRankSum=-0.967;SOR=1.179;VQSLOD=2.23;culprit=FS;ANN=ATT|sequence_feature|MODERATE|GDI2|GDI2|modified-residue:Phosphoserine|NM_001494.3|protein_coding||c.389-117_389-116dupAA||||||,ATT|intron_variant|MODIFIER|GDI2|GDI2|transcript|NM_001494.3|protein_coding|…	GT:AD:DP:GQ:PL	0/1/1:1,5:6:14:124,14,0,15
10	98388646	.	C	CATATACAT	708.73	PASS	AC=2;AF=1.00;AN=2;DP=15;ExcessHet=3.0103;FS=0.000;MLEAC=2;MLEAF=1.00;MQ=58.37;MQ0=0;QD=25.40;SOR=1.112;VQSLOD=4.14;culprit=FS;ANN=CATATACAT|sequence_feature|MODERATE|PIK3AP1|PIK3AP1|modified-residue:Phosphotyrosine|NM_152309.2|protein_coding||c.1376-397_1376-396insATGTATAT||||||,CATATACAT|intron_variant|MODIFIER|PIK3AP1|PIK3AP1|transcript|NM_152309.2|protein_coding|8/16|c.1376-397_1376-396insATGT…	GT:AD:DP:GQ:PL	1/1:0,15:15:51:746,51,0
10	98389687	rs61662185	A	AAAGAAG	353.25	PASS	AC=1;AF=0.500;AN=2;BaseQRankSum=-0.853;ClippingRankSum=0.000;DB;DP=18;ExcessHet=3.0103;FS=0.000;MLEAC=1;MLEAF=0.500;MQ=58.04;MQ0=0;MQRankSum=0.000;QD=32.11;ReadPosRankSum=0.792;SOR=0.223;VQSLOD=3.19;culprit=FS;ANN=AAAGAAG|sequence_feature|MODERATE|PIK3AP1|PIK3AP1|modified-residue:Phosphotyrosine|NM_152309.2|protein_coding||c.1376-1443_1376-1438dupCTTCTT||||||,AAAGAAG|intron_variant|MODIFIER|PIK3A…	GT:AD:DP:GQ:PL	0/1:1,10:11:9:390,0,9
10	126678122	rs140913543	GT	G	3604.73	PASS	AC=2;AF=1.00;AN=2;DB;DP=83;ExcessHet=3.0103;FS=0.000;MLEAC=2;MLEAF=1.00;MQ=39.32;MQ0=0;QD=27.36;SOR=2.642;VQSLOD=5.27;culprit=FS;ANN=G|frameshift_variant|HIGH|CTBP2|CTBP2|transcript|NM_022802.2|protein_coding|9/9|c.2922delA|p.Lys974fs|3047/4752|2922/2958|974/985||,G|downstream_gene_variant|MODIFIER|ZRANB1|ZRANB1|transcript|NM_017580.2|protein_coding||c.*4562delT|||||2118|	GT:AD:DP:GQ:PL	1/1:0,81:81:99:3642,244,0
10	126678204	.	G	GA	478.73	PASS	AC=1;AF=0.500;AN=2;BaseQRankSum=-0.484;ClippingRankSum=0.000;DP=27;ExcessHet=3.0103;FS=0.000;MLEAC=1;MLEAF=0.500;MQ=39.39;MQ0=0;MQRankSum=0.896;QD=20.81;ReadPosRankSum=-1.260;SOR=0.892;VQSLOD=2.52;culprit=FS;ANN=GA|frameshift_variant|HIGH|CTBP2|CTBP2|transcript|NM_022802.2|protein_coding|9/9|c.2840dupT|p.Gly949fs|2965/4752|2840/2958|947/985||,GA|downstream_gene_variant|MODIFIER|ZRANB1|ZRANB1|tran…	GT:AD:DP:GQ:PL	0/1:4,19:23:90:516,0,90
10	126678207	.	GA	G	478.73	PASS	AC=1;AF=0.500;AN=2;BaseQRankSum=-2.085;ClippingRankSum=0.000;DP=26;ExcessHet=3.0103;FS=0.000;MLEAC=1;MLEAF=0.500;MQ=39.24;MQ0=0;MQRankSum=0.896;QD=20.81;ReadPosRankSum=-1.260;SOR=0.892;VQSLOD=2.87;culprit=FS;ANN=G|frameshift_variant|HIGH|CTBP2|CTBP2|transcript|NM_022802.2|protein_coding|9/9|c.2837delT|p.Ile946fs|2962/4752|2837/2958|946/985||,G|downstream_gene_variant|MODIFIER|ZRANB1|ZRANB1|transc…	GT:AD:DP:GQ:PL	0/1:4,19:23:90:516,0,90
11	2996875	.	G	GT	33.6	PASS	AC=1;AF=0.333;AN=3;BaseQRankSum=-0.712;ClippingRankSum=0.000;DP=29;FS=0.000;MLEAC=1;MLEAF=0.333;MQ=60.00;MQ0=0;MQRankSum=0.000;QD=1.29;ReadPosRankSum=0.306;SOR=0.269;VQSLOD=3.33;culprit=QD;ANN=GT|sequence_feature|MODERATE|NAP1L4|NAP1L4|modified-residue:phosphothreonine|NM_005969.3|protein_coding||c.173+378dupA||||||,GT|intron_variant|MODIFIER|NAP1L4|NAP1L4|transcript|NM_005969.3|protein_coding|4/…	GT:AD:DP:GQ:PL	0/0/1:21,5:26:47:70,0,47,415
11	18426354	rs139302031	C	CAAAAAAAAA	492.65	PASS	AC=3;AF=1.00;AN=3;DB;DP=14;FS=0.000;MLEAC=3;MLEAF=1.00;MQ=53.06;MQ0=0;QD=26.19;SOR=0.693;VQSLOD=4.66;culprit=FS;ANN=CAAAAAAAAA|sequence_feature|MODERATE|LDHA|LDHA|modified-residue:phosphoserine|NM_001165414.1|protein_coding||c.798-642_798-641insAAAAAAAAA||||||,CAAAAAAAAA|intron_variant|MODIFIER|LDHA|LDHA|transcript|NM_001165414.1|protein_coding|6/7|c.798-640_798-632dupAAAAAAAAA||||||INFO_REALIGN_…	GT:AD:DP:GQ:PL	1/1/1:0,4:4:20:529,55,20,0
11	35772485	.	T	TA	59.6	PASS	AC=1;AF=0.333;AN=3;BaseQRankSum=-1.126;ClippingRankSum=0.000;DP=59;FS=3.180;MLEAC=1;MLEAF=0.333;MQ=60.00;MQ0=0;MQRankSum=0.000;QD=1.06;ReadPosRankSum=-0.961;SOR=1.341;VQSLOD=0.846;culprit=QD;ANN=TA|sequence_feature|MODERATE|TRIM44|TRIM44|modified-residue:phosphoserine|NM_017583.5|protein_coding||c.1007+15492_1007+15493insA||||||,TA|intron_variant|MODIFIER|TRIM44|TRIM44|transcript|NM_017583.5|prot…	GT:AD:DP:GQ:PL	0/0/1:47,9:56:96:96,0,113,987
11	35782953	rs139712282	C	CTA	2010.6	PASS	AC=3;AF=1.00;AN=3;DB;DP=76;FS=0.000;MLEAC=3;MLEAF=1.00;MQ=62.10;MQ0=0;QD=29.57;SOR=1.390;VQSLOD=5.30;culprit=FS;ANN=CTA|sequence_feature|MODERATE|TRIM44|TRIM44|modified-residue:phosphoserine|NM_017583.5|protein_coding||c.1007+25960_1007+25961insTA||||||,CTA|intron_variant|MODIFIER|TRIM44|TRIM44|transcript|NM_017583.5|protein_coding|4/4|c.1007+25970_1007+25971dupAT||||||INFO_REALIGN_3_PRIME	GT:AD:DP:GQ:PL	1/1/1:1,67:68:99:2046,308,113,0
11	35813622	rs57127722	TACACACACACACACACACAC	T	3065.6	PASS	AC=3;AF=1.00;AN=3;DB;DP=73;FS=0.000;MLEAC=3;MLEAF=1.00;MQ=57.89;MQ0=0;QD=26.93;SOR=0.781;VQSLOD=4.63;culprit=FS;ANN=T|sequence_feature|MODERATE|TRIM44|TRIM44|modified-residue:phosphoserine|NM_017583.5|protein_coding||c.1008-14285_1008-14266delACACACACACACACACACAC||||||,T|intron_variant|MODIFIER|TRIM44|TRIM44|transcript|NM_017583.5|protein_coding|4/4|c.1008-14265_1008-14246delACACACACACACACACACAC|…	GT:AD:DP:GQ:PL	1/1/1:0,69:69:99:3102,331,122,0
11	56143255	.	T	TGA	2761.6	PASS	AC=2;AF=0.667;AN=3;BaseQRankSum=1.474;ClippingRankSum=0.000;DP=128;FS=4.292;MLEAC=2;MLEAF=0.667;MQ=60.00;MQ0=0;MQRankSum=0.000;QD=21.92;ReadPosRankSum=-1.636;SOR=1.070;VQSLOD=0.255;culprit=DP;ANN=TGA|frameshift_variant|HIGH|OR8U8|OR8U8|transcript|NM_001013356.2|protein_coding|1/2|c.156_157insGA|p.Thr53fs|157/864|157/864|53/287||WARNING_TRANSCRIPT_NO_STOP_CODON,TGA|frameshift_variant|HIGH|OR8U1|OR…	GT:AD:DP:GQ:PL	0/1/1:55,71:126:42:2798,42,0,3168
11	56143259	.	AGT	A	2828.6	PASS	AC=2;AF=0.667;AN=3;BaseQRankSum=-4.145;ClippingRankSum=0.000;DP=132;FS=1.403;MLEAC=2;MLEAF=0.667;MQ=60.00;MQ0=0;MQRankSum=0.000;QD=21.59;ReadPosRankSum=-1.538;SOR=0.868;VQSLOD=0.198;culprit=DP;ANN=A|frameshift_variant|HIGH|OR8U8|OR8U8|transcript|NM_001013356.2|protein_coding|1/2|c.161_162delGT|p.Ser54fs|161/864|161/864|54/287||WARNING_TRANSCRIPT_NO_STOP_CODON,A|frameshift_variant|HIGH|OR8U1|OR8U1…	GT:AD:DP:GQ:PL	0/1/1:58,73:131:42:2865,42,0,3089
11	56143425	.	TATCA	T	2719.6	PASS	AC=1;AF=0.333;AN=3;BaseQRankSum=2.581;ClippingRankSum=0.000;DP=154;FS=3.790;MLEAC=1;MLEAF=0.333;MQ=59.99;MQ0=0;MQRankSum=-1.097;QD=17.66;ReadPosRankSum=0.550;SOR=0.996;VQSLOD=-3.964e-01;culprit=DP;ANN=T|frameshift_variant|HIGH|OR8U8|OR8U8|transcript|NM_001013356.2|protein_coding|1/2|c.327_330delATCA|p.Ile109fs|327/864|327/864|109/287||WARNING_TRANSCRIPT_NO_STOP_CODON,T|frameshift_variant|HIGH|OR8…	GT:AD:DP:GQ:PL	0/0/1:85,69:154:48:2756,0,48,4080
11	57074377	rs59853820	T	TG,TGG	395.12	PASS	AC=2,1;AF=0.667,0.333;AN=3;BaseQRankSum=-1.033;ClippingRankSum=0.000;DB;DP=27;FS=0.000;MLEAC=2,1;MLEAF=0.667,0.333;MQ=60.00;MQ0=0;MQRankSum=0.000;QD=20.80;ReadPosRankSum=0.000;SOR=3.056;VQSLOD=3.97;culprit=FS;ANN=TG|sequence_feature|MODERATE|TNKS1BP1|TNKS1BP1|modified-residue:phosphoserine|NM_033396.2|protein_coding||c.4316+1491dupC||||||,TGG|sequence_feature|MODERATE|TNKS1BP1|TNKS1BP1|modified-r…	GT:AD:DP:GQ:PL	1/1/2:1,11,7:19:9:431,150,102,95,230,9,0,212,16,239
11	58323241	rs5792108	GCA	G	1951.6	PASS	AC=3;AF=1.00;AN=3;BaseQRankSum=0.187;ClippingRankSum=0.000;DB;DP=68;FS=6.850;MLEAC=3;MLEAF=1.00;MQ=60.32;MQ0=0;MQRankSum=0.328;POSITIVE_TRAIN_SITE;QD=31.48;ReadPosRankSum=1.986;SOR=0.529;VQSLOD=1.77;culprit=ReadPosRankSum;ANN=G|sequence_feature|MODERATE|LPXN|LPXN|modified-residue:phosphoserine|NM_001143995.2|protein_coding||c.234-830_234-829delTG||||||,G|intron_variant|MODIFIER|LPXN|LPXN|transcri…	GT:AD:DP:GQ:PL	1/1/1:2,60:62:45:1988,219,45,0
11	63525194	rs71039672	CT	C	64.35	PASS	AC=2;AF=0.667;AN=3;BaseQRankSum=1.383;ClippingRankSum=0.000;DB;DP=30;FS=0.000;MLEAC=2;MLEAF=0.667;MQ=60.36;MQ0=0;MQRankSum=0.210;QD=10.73;ReadPosRankSum=-1.383;SOR=2.303;VQSLOD=3.19;culprit=FS;ANN=C|sequence_feature|MODERATE|RTN3|RTN3|cross-link:Glycyl_lysine_isopeptide_(Lys-Gly)_(interchain_with_G-Cter_in_ubiquitin)|NM_001265589.1|protein_coding||c.3054-433delT||||||,C|downstream_gene_variant|MO…	GT:AD:DP:GQ:PL	0/1/1:1,5:6:9:100,12,0,9
11	89608808	rs371045630	GC	G	458.6	PASS	AC=1;AF=0.333;AN=3;BaseQRankSum=-1.732;ClippingRankSum=0.000;DB;DP=48;FS=5.395;MLEAC=1;MLEAF=0.333;MQ=37.38;MQ0=0;MQRankSum=-1.456;QD=9.55;ReadPosRankSum=0.383;SOR=1.905;VQSLOD=-1.384e-01;culprit=MQRankSum;ANN=G|frameshift_variant|HIGH|TRIM64B|TRIM64B|transcript|NM_001164397.1|protein_coding|1/6|c.377delG|p.Ser126fs|377/1533|377/1350|126/449||;LOF=(TRIM64B|TRIM64B|1|1.00)	GT:AD:DP:GQ:PL	0/0/1:32,16:48:48:495,0,48,1134
11	102738793	rs5794199	G	GT	3097.6	PASS	AC=3;AF=1.00;AN=3;DB;DP=70;FS=0.000;MLEAC=3;MLEAF=1.00;MQ=60.00;MQ0=0;POSITIVE_TRAIN_SITE;QD=26.97;SOR=0.874;VQSLOD=6.76;culprit=FS;ANN=GT|frameshift_variant|HIGH|MMP12|MMP12|transcript|NM_002426.5|protein_coding|5/10|c.631dupA|p.Thr211fs|728/1878|631/1410|211/469||WARNING_TRANSCRIPT_MULTIPLE_STOP_CODONS;LOF=(MMP12|MMP12|1|1.00)	GT:AD:DP:GQ:PL	1/1/1:0,70:70:99:3134,334,123,0
12	2062323	rs111543431	T	TTGC	1612.73	PASS	AC=2;AF=1.00;AN=2;DB;DP=46;ExcessHet=3.0103;FS=0.000;MLEAC=2;MLEAF=1.00;MQ=58.95;MQ0=0;POSITIVE_TRAIN_SITE;QD=30.54;SOR=0.859;VQSLOD=6.69;culprit=FS;ANN=TTGC|disruptive_inframe_insertion|MODERATE|DCP1B|DCP1B|transcript|NM_152640.4|protein_coding|7/9|c.780_782dupGCA|p.Gln261dup|886/2116|782/1854|261/617||	GT:AD:DP:GQ:PL	1/1:0,37:37:99:1650,114,0
12	40884664	.	C	CA	2201.6	PASS	AC=3;AF=1.00;AN=3;DP=53;FS=0.000;MLEAC=3;MLEAF=1.00;MQ=60.00;MQ0=0;QD=31.47;SOR=0.732;VQSLOD=5.40;culprit=FS;ANN=CA|frameshift_variant|HIGH|MUC19|MUC19|transcript|NM_173600.2|protein_coding|56/173|c.17911dupA|p.Thr5971fs|17966/24829|17912/24666|5971/8221||WARNING_TRANSCRIPT_MULTIPLE_STOP_CODONS&INFO_REALIGN_3_PRIME;LOF=(MUC19|MUC19|1|1.00)	GT:AD:DP:GQ:PL	1/1/1:0,51:51:90:2238,243,90,0
12	52683860	.	ACTT	A	124.37	PASS	AC=2;AF=0.667;AN=3;BaseQRankSum=-0.180;ClippingRankSum=0.000;DP=9;FS=0.000;MLEAC=2;MLEAF=0.667;MQ=28.74;MQ0=0;MQRankSum=0.566;QD=17.77;ReadPosRankSum=-1.006;SOR=0.223;VQSLOD=2.86;culprit=FS;ANN=A|frameshift_variant&splice_donor_variant&splice_region_variant&intron_variant|HIGH|KRT81|KRT81|transcript|NM_002281.3|protein_coding|2/9|c.577_578+1delAAG|p.Lys193fs||577/1518|193/505||,A|intron_variant|M…	GT:AD:DP:GQ:PL	0/1/1:3,4:7:3:159,3,0,134
12	62724538	rs201549202	C	CA	137.08	PASS	AC=2;AF=0.667;AN=3;BaseQRankSum=-0.589;ClippingRankSum=0.000;DB;DP=18;FS=0.000;MLEAC=2;MLEAF=0.667;MQ=60.00;MQ0=0;MQRankSum=0.000;QD=15.23;ReadPosRankSum=0.000;SOR=0.223;VQSLOD=3.29;culprit=FS;ANN=CA|sequence_feature|MODERATE|USP15|USP15|cross-link:Glycyl_lysine_isopeptide_(Lys-Gly)_(interchain_with_G-Cter_in_ubiquitin)|NM_001252078.1|protein_coding||c.683+4824_683+4825insA||||||,CA|intron_varian…	GT:AD:DP:GQ:PL	0/1/1:1,8:9:4:172,22,0,4
12	72023336	.	T	TACACACACAC	781.6	PASS	AC=2;AF=0.667;AN=3;BaseQRankSum=-2.658;ClippingRankSum=0.000;DP=44;FS=3.558;MLEAC=1;MLEAF=0.333;MQ=60.00;MQ0=0;MQRankSum=0.000;POSITIVE_TRAIN_SITE;QD=24.43;ReadPosRankSum=-0.343;SOR=0.454;VQSLOD=2.53;culprit=QD;ANN=TACACACACAC|sequence_feature|MODERATE|ZFC3H1|ZFC3H1|modified-residue:phosphothreonine|NM_144982.4|protein_coding||c.3826+43_3826+52dupGTGTGTGTGT||||||,TACACACACAC|intron_variant|MODIFI…	GT:AD:DP:GQ:PL	0/1/1:12,20:32:29:766,29,0,1152
12	102499659	.	AGTGTCCT	A	40.6	PASS	AC=1;AF=0.333;AN=3;BaseQRankSum=-0.766;ClippingRankSum=0.000;DP=28;FS=0.000;MLEAC=1;MLEAF=0.333;MQ=60.00;MQ0=0;MQRankSum=0.000;QD=1.50;ReadPosRankSum=-1.189;SOR=0.941;VQSLOD=3.13;culprit=QD;ANN=A|sequence_feature|MODERATE|NUP37|NUP37|cross-link:Glycyl_lysine_isopeptide_(Lys-Gly)_(interchain_with_G-Cter_in_ubiquitin)|NM_024057.3|protein_coding||c.282-4784_282-4778delAGGACAC||||||,A|intron_variant|…	GT:AD:DP:GQ:PL	0/0/1:23,4:27:63:77,0,63,3168
12	109240074	.	T	TA	42.69	PASS	AC=1;AF=0.333;AN=3;BaseQRankSum=1.527;ClippingRankSum=0.000;DP=37;FS=0.000;MLEAC=1;MLEAF=0.333;MQ=60.00;MQ0=0;MQRankSum=0.000;QD=1.38;ReadPosRankSum=1.706;SOR=0.368;VQSLOD=3.04;culprit=QD;ANN=TA|sequence_feature|MODERATE|SSH1|SSH1|modified-residue:Phosphoserine|NM_018984.3|protein_coding||c.110+6339dupT||||||,TA|intron_variant|MODIFIER|SSH1|SSH1|transcript|NM_018984.3|protein_coding|2/14|c.110+63…	GT:AD:DP:GQ:PL	0/0/1:26,5:31:61:62,0,61,489
12	109246014	.	C	CT	47.62	PASS	AC=1;AF=0.333;AN=3;BaseQRankSum=-0.454;ClippingRankSum=0.000;DP=37;FS=0.000;MLEAC=1;MLEAF=0.333;MQ=59.82;MQ0=0;MQRankSum=0.000;QD=2.16;ReadPosRankSum=-0.641;SOR=0.934;VQSLOD=3.19;culprit=QD;ANN=CT|sequence_feature|MODERATE|SSH1|SSH1|modified-residue:Phosphoserine|NM_018984.3|protein_coding||c.110+399dupA||||||,CT|intron_variant|MODIFIER|SSH1|SSH1|transcript|NM_018984.3|protein_coding|2/14|c.110+3…	GT:AD:DP:GQ:PL	0/0/1:17,5:22:33:59,0,33,279
12	120243941	.	C	CAAA	67.45	PASS	AC=3;AF=1.00;AN=3;DP=22;FS=0.000;MLEAC=3;MLEAF=1.00;MQ=59.78;MQ0=0;QD=33.72;SOR=0.693;VQSLOD=4.83;culprit=FS;ANN=CAAA|sequence_feature|MODERATE|CIT|CIT|modified-residue:phosphoserine|NM_001206999.1|protein_coding||c.1112-2751_1112-2749dupTTT||||||,CAAA|intron_variant|MODIFIER|CIT|CIT|transcript|NM_001206999.1|protein_coding|9/47|c.1112-2751_1112-2749dupTTT||||||	GT:AD:DP:GQ:PL	1/1/1:0,2:2:7:103,18,7,0
12	122359397	rs142042908	G	GGAGGAGGAGGAGAAA	3314.6	PASS	AC=3;AF=1.00;AN=3;DB;DP=74;FS=0.000;MLEAC=3;MLEAF=1.00;MQ=60.39;MQ0=0;POSITIVE_TRAIN_SITE;QD=25.33;SOR=0.693;VQSLOD=4.88;culprit=FS;ANN=GGAGGAGGAGGAGAAA|disruptive_inframe_insertion|MODERATE|WDR66|WDR66|transcript|NM_144668.5|protein_coding|2/22|c.196_197insAGAAAGAGGAGGAGG|p.Glu65_Gly66insGluLysGluGluGlu|356/3771|197/3450|66/1149||INFO_REALIGN_3_PRIME,GGAGGAGGAGGAGAAA|downstream_gene_variant|MODI…	GT:AD:DP:GQ:PL	1/1/1:0,68:68:99:3351,360,132,0
13	72440658	rs5804590	TGCCGCC	T	53.7	PASS	AC=2;AF=1.00;AN=2;DB;DP=3;ExcessHet=3.0103;FS=0.000;MLEAC=2;MLEAF=1.00;MQ=60.00;MQ0=0;POSITIVE_TRAIN_SITE;QD=26.85;SOR=2.303;VQSLOD=5.61;culprit=FS;ANN=T|frameshift_variant&splice_acceptor_variant&splice_region_variant&intron_variant|HIGH|DACH1|DACH1|transcript|NM_080759.5|protein_coding|2/12|c.241+3_243delGGCGGC|p.Gly81fs|666/5233|242/2121|81/706||;LOF=(DACH1|DACH1|1|1.00)	GT:AD:DP:GQ:PL	1/1:0,2:2:6:90,6,0
13	78272267	rs201380414	T	TGG	143	PASS	AC=2;AF=1.00;AN=2;DB;DP=4;ExcessHet=3.0103;FS=0.000;MLEAC=2;MLEAF=1.00;MQ=60.00;MQ0=0;POSITIVE_TRAIN_SITE;QD=36.59;SOR=0.693;VQSLOD=5.74;culprit=QD;ANN=TGG|frameshift_variant|HIGH|SLAIN1|SLAIN1|transcript|NM_001242868.1|protein_coding|1/7|c.220_221dupGG|p.Leu75fs|282/2855|222/1773|74/590||INFO_REALIGN_3_PRIME,TGG|upstream_gene_variant|MODIFIER|MIR3665|MIR3665|transcript|NR_037438.1|pseudogene||n.…	GT:AD:DP:GQ:PL	1/1:0,4:4:12:180,12,0
14	20840539	.	A	ATGTG	932.73	PASS	AC=2;AF=1.00;AN=2;BaseQRankSum=0.440;ClippingRankSum=0.000;DP=43;ExcessHet=3.0103;FS=5.351;MLEAC=1;MLEAF=0.500;MQ=61.74;MQ0=0;MQRankSum=0.674;POSITIVE_TRAIN_SITE;QD=35.11;ReadPosRankSum=1.737;SOR=1.926;VQSLOD=1.77;culprit=QD;ANN=ATGTG|sequence_feature|MODERATE|TEP1|TEP1|modified-residue:phosphoserine|NM_007110.4|protein_coding||c.7076+349_7076+352dupCACA||||||,ATGTG|intron_variant|MODIFIER|TEP1|T…	GT:AD:DP:GQ:PL	1/1:1,25:26:41:955,41,0
14	68331678	.	C	CTTTTTTT	239.75	PASS	AC=2;AF=1.00;AN=2;DP=11;ExcessHet=3.0103;FS=0.000;MLEAC=2;MLEAF=1.00;MQ=58.79;MQ0=0;QD=34.25;SOR=0.941;VQSLOD=3.96;culprit=FS;ANN=CTTTTTTT|splice_acceptor_variant&intron_variant|HIGH|RAD51B|RAD51B|transcript|NM_001321821.1|protein_coding|4/10|c.316-9_316-3dupTTTTTTT||||||INFO_REALIGN_3_PRIME;LOF=(RAD51B|RAD51B|1|1.00)	GT:AD:DP:GQ:PL	1/1:0,7:7:24:277,24,0
15	23685004	rs34879341	G	GCAT	1447.6	PASS	AC=3;AF=1.00;AN=3;DB;DP=37;FS=0.000;MLEAC=3;MLEAF=1.00;MQ=58.14;MQ0=0;QD=30.21;SOR=0.752;VQSLOD=5.52;culprit=FS;ANN=GCAT|conservative_inframe_insertion|MODERATE|GOLGA6L2|GOLGA6L2|transcript|NM_001304388.1|protein_coding|8/8|c.2615_2617dupATG|p.Asp872dup|2679/3151|2617/2730|873/909||	GT:AD:DP:GQ:PL	1/1/1:0,33:33:58:1484,157,58,0
15	23685064	.	A	ACATCTTCTCCTCCTGGCCCCGCATCTTCTCCTCCTGCTCCCG	240.94	PASS	AC=3;AF=1.00;AN=3;DP=45;FS=0.000;MLEAC=3;MLEAF=1.00;MQ=55.93;MQ0=0;QD=24.09;SOR=3.258;VQSLOD=3.88;culprit=FS;ANN=ACATCTTCTCCTCCTGGCCCCGCATCTTCTCCTCCTGCTCCCG|conservative_inframe_insertion|MODERATE|GOLGA6L2|GOLGA6L2|transcript|NM_001304388.1|protein_coding|8/8|c.2516_2557dupCGGGAGCAGGAGGAGAAGATGCGGGGCCAGGAGGAGAAGATG|p.Ala839_Asp852dup|2619/3151|2557/2730|853/909||	GT:AD:DP:GQ:PL	1/1/1:0,10:10:11:277,36,11,0
15	78913067	rs143833222	ACAG	A	2147.6	PASS	AC=3;AF=1.00;AN=3;DB;DP=59;FS=0.000;MLEAC=3;MLEAF=1.00;MQ=59.19;MQ0=0;POSITIVE_TRAIN_SITE;QD=30.75;SOR=1.112;VQSLOD=6.90;culprit=FS;ANN=A|conservative_inframe_deletion|MODERATE|CHRNA3|CHRNA3|transcript|NM_000743.4|protein_coding|1/6|c.67_69delCTG|p.Leu23del|570/3318|67/1518|23/505||,A|downstream_gene_variant|MODIFIER|CHRNB4|CHRNB4|transcript|NM_000750.3|protein_coding||c.*4405_*4407delCTG|||||356…	GT:AD:DP:GQ:PL	1/1/1:0,49:49:87:2184,235,87,0
15	86205133	rs57846021	GAA	G	107.91	PASS	AC=2;AF=0.667;AN=3;BaseQRankSum=0.736;ClippingRankSum=0.736;DB;DP=13;FS=4.771;MLEAC=2;MLEAF=0.667;MQ=60.00;MQ0=0;MQRankSum=0.736;QD=17.98;ReadPosRankSum=0.736;SOR=1.872;VQSLOD=0.742;culprit=DP;ANN=G|sequence_feature|MODERATE|AKAP13|AKAP13|modified-residue:phosphoserine|NM_006738.5|protein_coding||c.4746-485_4746-484delAA||||||,G|intron_variant|MODIFIER|AKAP13|AKAP13|transcript|NM_006738.5|protein…	GT:AD:DP:GQ:PL	0/1/1:1,5:6:12:144,12,0,20
16	85815220	rs10673082	C	CTT	64.44	PASS	AC=3;AF=1.00;AN=3;DB;DP=17;FS=0.000;MLEAC=3;MLEAF=1.00;MQ=60.00;MQ0=0;QD=21.48;SOR=1.179;VQSLOD=3.95;culprit=FS;ANN=CTT|sequence_feature|MODERATE|EMC8|EMC8|modified-residue:phosphoserine|NM_006067.4|protein_coding||c.309-336_309-335dupAA||||||,CTT|intron_variant|MODIFIER|EMC8|EMC8|transcript|NM_006067.4|protein_coding|2/4|c.309-336_309-335dupAA||||||	GT:AD:DP:GQ:PL	1/1/1:0,3:3:7:100,19,7,0
17	5286861	rs56107242	GTAGTGTTTGGAATTTTCTGTTCATA	G	1278.73	PASS	AC=2;AF=1.00;AN=2;DB;DP=45;ExcessHet=3.0103;FS=0.000;MLEAC=2;MLEAF=1.00;MQ=57.79;MQ0=0;POSITIVE_TRAIN_SITE;QD=28.13;SOR=0.906;VQSLOD=5.57;culprit=FS;ANN=G|splice_acceptor_variant&3_prime_UTR_variant&intron_variant|HIGH|RABEP1|RABEP1|transcript|NM_004703.5|protein_coding|19/19|c.*346-2_*368delTAGTGTTTGGAATTTTCTGTTCATA|||||369|INFO_REALIGN_3_PRIME,G|splice_region_variant|LOW|RABEP1|RABEP1|transcrip…	GT:AD:DP:GQ:PL	1/1:0,29:29:93:1316,93,0
17	7470285	rs58837213	CA	C	1684.73	PASS	AC=2;AF=1.00;AN=2;DB;DP=52;ExcessHet=3.0103;FS=0.000;MLEAC=2;MLEAF=1.00;MQ=60.62;MQ0=0;POSITIVE_TRAIN_SITE;QD=34.38;SOR=0.909;VQSLOD=6.21;culprit=FS;ANN=C|frameshift_variant&splice_region_variant|HIGH|SENP3|SENP3|transcript|NM_015670.5|protein_coding|8/12|c.1307delA|p.Lys436fs|1590/2494|1307/1725|436/574||INFO_REALIGN_3_PRIME,C|non_coding_transcript_exon_variant|MODIFIER|SENP3-EIF4A1|SENP3-EIF4A1…	GT:AD:DP:GQ:PL	1/1:0,49:49:99:1722,147,0
17	7578523	.	T	TG	1546.73	PASS	AC=2;AF=1.00;AN=2;DP=44;ExcessHet=3.0103;FS=0.000;MLEAC=2;MLEAF=1.00;MQ=60.00;MQ0=0;QD=24.79;SOR=1.364;VQSLOD=3.88;culprit=FS;ANN=TG|frameshift_variant|HIGH|TP53|TP53|transcript|NM_000546.5|protein_coding|5/11|c.406dupC|p.Gln136fs|608/2591|406/1182|136/393||,TG|structural_interaction_variant|HIGH|TP53|TP53|interaction|1GZH:A_136-A_276:NM_000546.5|protein_coding|5/11|c.406dupC||||||,TG|structural_…	GT:AD:DP:GQ:PL	1/1:0,44:44:99:1584,135,0
17	17039561	rs113250356	CCAG	C	1834.73	PASS	AC=2;AF=1.00;AN=2;DB;DP=53;ExcessHet=3.0103;FS=0.000;MLEAC=2;MLEAF=1.00;MQ=58.68;MQ0=0;QD=31.64;SOR=1.609;VQSLOD=5.39;culprit=FS;ANN=C|disruptive_inframe_deletion|MODERATE|MPRIP|MPRIP|transcript|NM_015134.3|protein_coding|6/23|c.566_568delGCA|p.Ser189del|655/10960|566/3117|189/1038||INFO_REALIGN_3_PRIME,C|sequence_feature|MODERATE|MPRIP|MPRIP|compositionally-biased-region:Ser-rich|NM_015134.3|pro…	GT:AD:DP:GQ:PL	1/1:0,43:43:99:1872,130,0
17	21319650	.	CGAG	C	1480.73	PASS	AC=1;AF=0.500;AN=2;BaseQRankSum=0.453;ClippingRankSum=0.000;DP=143;ExcessHet=3.0103;FS=0.000;MLEAC=1;MLEAF=0.500;MQ=57.30;MQ0=0;MQRankSum=-4.633;NEGATIVE_TRAIN_SITE;POSITIVE_TRAIN_SITE;QD=10.97;ReadPosRankSum=0.830;SOR=0.707;VQSLOD=0.226;culprit=MQRankSum;ANN=C|conservative_inframe_deletion|MODERATE|KCNJ12|KCNJ12|transcript|NM_021012.4|protein_coding|3/3|c.1000_1002delGAG|p.Glu334del|1705/5230|10…	GT:AD:DP:GQ:PL	0/1:92,43:135:99:1518,0,3777
17	27049263	rs57128027	CAA	C	209.58	PASS	AC=2;AF=0.667;AN=3;BaseQRankSum=0.157;ClippingRankSum=0.000;DB;DP=27;FS=0.000;MLEAC=1;MLEAF=0.333;MQ=60.36;MQ0=0;MQRankSum=1.534;QD=20.96;SOR=0.330;VQSLOD=2.75;culprit=FS;ANN=C|sequence_feature|MODERATE|RPL23A|RPL23A|cross-link:Glycyl_lysine_isopeptide_(Lys-Gly)_(interchain_with_G-Cter_in_ubiquitin)|NM_000984.5|protein_coding||c.210-477_210-476delAA||||||,C|sequence_feature|MODERATE|RPL23A|RPL23A…	GT:AD:DP:GQ:PL	0/1/1:1,9:10:10:232,24,0,10
17	66453657	.	GCCCCGCCCCTACCCCGCCCCGTCCCCA	G	152.81	PASS	AC=2;AF=0.667;AN=3;BaseQRankSum=-0.872;ClippingRankSum=0.000;DP=17;FS=0.000;MLEAC=2;MLEAF=0.667;MQ=58.40;MQ0=0;MQRankSum=-0.728;QD=15.28;ReadPosRankSum=0.984;SOR=1.609;VQSLOD=2.05;culprit=FS;ANN=G|bidirectional_gene_fusion|HIGH|PRKAR1A&WIPI1|PRKAR1A&WIPI1|gene_variant|WIPI1|||n.66453684_66453658delTGGGGACGGGGCGGGGTAGGGGCGGGG||||||	GT:AD:DP:GQ:PL	0/1/1:3,7:10:13:189,13,0,208
17	72889676	.	G	GGGCTCCGTAGGTTCCATGGGCTCCGTAGGTTCCATGGGCTCCGTAGGTTCCATC	3130.6	PASS	AC=3;AF=1.00;AN=3;DP=64;FS=0.000;MLEAC=3;MLEAF=1.00;MQ=44.64;MQ0=0;QD=29.57;SOR=1.382;VQSLOD=5.11;culprit=FS;ANN=GGGCTCCGTAGGTTCCATGGGCTCCGTAGGTTCCATGGGCTCCGTAGGTTCCATC|disruptive_inframe_insertion|MODERATE|FADS6|FADS6|transcript|NM_178128.5|protein_coding|1/6|c.17_18insGATGGAACCTACGGAGCCCATGGAACCTACGGAGCCCATGGAACCTACGGAGCC|p.Pro6_Met7insMetGluProThrGluProMetGluProThrGluProMetGluProThrGluPro|233/…	GT:AD:DP:GQ:PL	1/1/1:0,58:58:99:3167,365,135,0
17	77808240	.	C	CGTG	566.77	PASS	AC=2;AF=0.667;AN=3;BaseQRankSum=1.051;ClippingRankSum=0.000;DP=37;FS=7.890;MLEAC=2;MLEAF=0.667;MQ=59.64;MQ0=0;MQRankSum=-0.770;QD=19.54;ReadPosRankSum=-0.687;SOR=3.223;VQSLOD=0.035;culprit=FS;ANN=CGTG|conservative_inframe_insertion|MODERATE|CBX4|CBX4|transcript|NM_003655.2|protein_coding|5/5|c.1198_1200dupCAC|p.His400dup|1363/2649|1200/1683|400/560||	GT:AD:DP:GQ:PL	0/1/1:12,17:29:14:603,14,0,441
18	51737758	rs10666436	T	TAC,TACACACACAC	973.73	PASS	AC=1,1;AF=0.500,0.500;AN=2;BaseQRankSum=-0.558;ClippingRankSum=0.000;DB;DP=45;ExcessHet=3.0103;FS=2.431;MLEAC=1,1;MLEAF=0.500,0.500;MQ=59.12;MQ0=0;MQRankSum=-0.207;POSITIVE_TRAIN_SITE;QD=24.34;ReadPosRankSum=-1.489;SOR=0.827;VQSLOD=2.02;culprit=ReadPosRankSum;ANN=TAC|sequence_feature|MODERATE|MBD2|MBD2|modified-residue:phosphoserine|NM_003927.4|protein_coding||c.543-6233_543-6232dupGT||||||,TACAC…	GT:AD:DP:GQ:PL	1/2:3,19,18:40:99:1011,474,509,444,0,761
18	51739455	rs112013060	CG	C,CGG	192.73	PASS	AC=1,1;AF=0.500,0.500;AN=2;BaseQRankSum=1.552;ClippingRankSum=0.000;DB;DP=12;ExcessHet=3.0103;FS=7.404;MLEAC=1,1;MLEAF=0.500,0.500;MQ=60.00;MQ0=0;MQRankSum=0.000;QD=17.52;ReadPosRankSum=1.268;SOR=3.229;VQSLOD=0.418;culprit=FS;ANN=C|sequence_feature|MODERATE|MBD2|MBD2|modified-residue:phosphoserine|NM_003927.4|protein_coding||c.543-7929delC||||||,CGG|sequence_feature|MODERATE|MBD2|MBD2|modified-re…	GT:AD:DP:GQ:PL	1/2:1,6,4:11:99:230,101,132,149,0,190
18	51741093	rs142234838	GTAGAATTCTTT	G	223.73	PASS	AC=1;AF=0.500;AN=2;BaseQRankSum=0.423;ClippingRankSum=0.000;DB;DP=23;ExcessHet=3.0103;FS=4.752;MLEAC=1;MLEAF=0.500;MQ=60.00;MQ0=0;MQRankSum=0.000;QD=12.43;ReadPosRankSum=-0.684;SOR=1.479;VQSLOD=0.870;culprit=QD;ANN=G|sequence_feature|MODERATE|MBD2|MBD2|modified-residue:phosphoserine|NM_003927.4|protein_coding||c.542+9284_542+9294delAAAGAATTCTA||||||,G|intron_variant|MODIFIER|MBD2|MBD2|transcript|…	GT:AD:DP:GQ:PL	0/1:11,7:18:99:261,0,484
18	51743125	.	C	CA	118.73	PASS	AC=1;AF=0.500;AN=2;BaseQRankSum=-0.602;ClippingRankSum=0.000;DP=21;ExcessHet=3.0103;FS=6.021;MLEAC=1;MLEAF=0.500;MQ=60.00;MQ0=0;MQRankSum=0.000;QD=6.98;ReadPosRankSum=1.371;SOR=0.061;VQSLOD=0.659;culprit=QD;ANN=CA|sequence_feature|MODERATE|MBD2|MBD2|modified-residue:phosphoserine|NM_003927.4|protein_coding||c.542+7262dupT||||||,CA|intron_variant|MODIFIER|MBD2|MBD2|transcript|NM_003927.4|protein_c…	GT:AD:DP:GQ:PL	0/1:10,7:17:99:156,0,188
18	51750584	.	T	TGCC	85.73	PASS	AC=1;AF=0.500;AN=2;BaseQRankSum=0.319;ClippingRankSum=0.000;DP=5;ExcessHet=3.0103;FS=0.000;MLEAC=1;MLEAF=0.500;MQ=62.13;MQ0=0;MQRankSum=0.319;QD=21.43;ReadPosRankSum=-1.150;SOR=1.609;VQSLOD=3.04;culprit=FS;ANN=TGCC|conservative_inframe_insertion|MODERATE|MBD2|MBD2|transcript|NM_003927.4|protein_coding|1/7|c.343_345dupGGC|p.Gly115dup|574/5188|345/1236|115/411||,TGCC|upstream_gene_variant|MODIFIER|…	GT:AD:DP:GQ:PL	0/1:1,3:4:36:123,0,36
19	501701	rs71171990	G	GACACCACCTCCCCGGAGCCTCCCA	623.61	PASS	AC=2;AF=0.667;AN=3;BaseQRankSum=0.834;ClippingRankSum=0.000;DB;DP=27;FS=0.000;MLEAC=2;MLEAF=0.667;MQ=56.44;MQ0=0;MQRankSum=-1.030;QD=24.94;ReadPosRankSum=-0.583;SOR=1.022;VQSLOD=2.91;culprit=FS;ANN=GACACCACCTCCCCGGAGCCTCCCA|conservative_inframe_insertion|MODERATE|MADCAM1|MADCAM1|transcript|NM_130760.2|protein_coding|4/5|c.717_718insCCTCCCAACACCACCTCCCCGGAG|p.Glu239_Ser240insProProAsnThrThrSerProG…	GT:AD:DP:GQ:PL	0/1/1:8,17:25:27:660,27,0,245
19	501743	.	T	TCTCCCGACACCACCTCCCAGGAGCCTCCCGACACCACCTCCCAGGAGC	1176.6	PASS	AC=3;AF=1.00;AN=3;DP=26;FS=0.000;MLEAC=3;MLEAF=1.00;MQ=56.03;MQ0=0;QD=32.97;SOR=0.804;VQSLOD=4.96;culprit=FS;ANN=TCTCCCGACACCACCTCCCAGGAGCCTCCCGACACCACCTCCCAGGAGC|disruptive_inframe_insertion|MODERATE|MADCAM1|MADCAM1|transcript|NM_130760.2|protein_coding|4/5|c.784_785insAGGAGCCTCCCGACACCACCTCCCAGGAGCCTCCCGACACCACCTCCC|p.Ser261_Pro262insGlnGluProProAspThrThrSerGlnGluProProAspThrThrSer|795/1537|785…	GT:AD:DP:GQ:PL	1/1/1:0,17:17:52:1213,142,52,0
19	1211459	rs113785486	TG	T	400.58	PASS	AC=2;AF=0.667;AN=3;BaseQRankSum=-0.796;ClippingRankSum=0.000;DB;DP=50;FS=0.000;MLEAC=2;MLEAF=0.667;MQ=60.00;MQ0=0;MQRankSum=0.000;QD=10.54;ReadPosRankSum=1.536;SOR=0.656;VQSLOD=3.25;culprit=FS;ANN=T|sequence_feature|MODERATE|STK11|STK11|modified-residue:N6-acetyllysine|NM_000455.4|protein_coding||c.290+4258delG||||||,T|intron_variant|MODIFIER|STK11|STK11|transcript|NM_000455.4|protein_coding|1/9|…	GT:AD:DP:GQ:PL	0/1/1:18,20:38:6:436,6,0,379
19	1216833	rs34536728	C	CA	65.73	PASS	AC=2;AF=0.667;AN=3;BaseQRankSum=1.568;ClippingRankSum=0.000;DB;DP=19;FS=0.000;MLEAC=2;MLEAF=0.667;MQ=57.89;MQ0=0;MQRankSum=0.748;QD=5.98;ReadPosRankSum=0.349;SOR=0.527;VQSLOD=3.32;culprit=FS;ANN=CA|sequence_feature|MODERATE|STK11|STK11|modified-residue:N6-acetyllysine|NM_000455.4|protein_coding||c.291-1583_291-1582insA||||||,CA|intron_variant|MODIFIER|STK11|STK11|transcript|NM_000455.4|protein_co…	GT:AD:DP:GQ:PL	0/1/1:6,5:11:2:100,2,0,60
19	7703490	rs144737616	TA	T	39.69	PASS	AC=1;AF=0.333;AN=3;BaseQRankSum=0.172;ClippingRankSum=0.000;DB;DP=21;FS=0.000;MLEAC=1;MLEAF=0.333;MQ=60.51;MQ0=0;MQRankSum=1.618;QD=2.48;ReadPosRankSum=-1.421;SOR=0.804;VQSLOD=2.51;culprit=QD;ANN=T|sequence_feature|MODERATE|STXBP2|STXBP2|cross-link:Glycyl_lysine_isopeptide_(Lys-Gly)_(interchain_with_G-Cter_in_ubiquitin)|NM_001272034.1|protein_coding||c.38-121delA||||||,T|upstream_gene_variant|MOD…	GT:AD:DP:GQ:PL	0/0/1:11,5:16:17:76,0,17,209
20	34220496	.	CTTG	C	933.6	PASS	AC=1;AF=0.333;AN=3;BaseQRankSum=0.978;ClippingRankSum=0.000;DP=81;FS=0.895;MLEAC=1;MLEAF=0.333;MQ=60.00;MQ0=0;MQRankSum=0.000;QD=12.12;ReadPosRankSum=-0.955;SOR=0.696;VQSLOD=1.03;culprit=QD;ANN=C|disruptive_inframe_deletion|MODERATE|CPNE1|CPNE1|transcript|NM_003915.5|protein_coding|3/16|c.264_266delCAA|p.Asn88del|633/2206|264/1629|88/542||	GT:AD:DP:GQ:PL	0/0/1:50,27:77:69:970,0,69,2415
21	10942924	rs113444703	CCTT	C	2001.6	PASS	AC=1;AF=0.333;AN=3;BaseQRankSum=-0.438;ClippingRankSum=0.000;DB;DP=158;FS=6.197;MLEAC=1;MLEAF=0.333;MQ=60.00;MQ0=0;MQRankSum=0.000;QD=13.00;ReadPosRankSum=0.539;SOR=0.997;VQSLOD=-4.243e-01;culprit=DP;ANN=C|disruptive_inframe_deletion|MODERATE|TPTE|TPTE|transcript|NM_199261.3|protein_coding|12/24|c.660_662delAAG|p.Arg221del|1053/2765|660/1656|220/551||	GT:AD:DP:GQ:PL	0/0/1:99,55:154:99:2038,0,132,4217
X	7811811	.	TCA	T	92.73	PASS	AC=1;AF=0.500;AN=2;BaseQRankSum=1.834;ClippingRankSum=0.000;DP=10;ExcessHet=3.0103;FS=6.990;MLEAC=1;MLEAF=0.500;MQ=33.37;MQ0=0;MQRankSum=0.370;QD=9.27;ReadPosRankSum=-2.287;SOR=0.012;VQSLOD=-4.047e-01;culprit=ReadPosRankSum;ANN=T|frameshift_variant|HIGH|VCX|VCX|transcript|NM_013452.2|protein_coding|3/3|c.376_377delCA|p.Gln126fs|595/967|376/621|126/206||;LOF=(VCX|VCX|1|1.00)	GT:AD:DP:GQ:PL	0/1:8,2:10:99:130,0,814
X	54062535	.	C	CAAAAAAAA	55.73	PASS	AC=1;AF=0.500;AN=2;BaseQRankSum=-0.967;ClippingRankSum=0.000;DP=8;ExcessHet=3.0103;FS=4.771;MLEAC=1;MLEAF=0.500;MQ=57.79;MQ0=0;MQRankSum=0.000;QD=18.58;ReadPosRankSum=0.000;SOR=1.414;VQSLOD=0.803;culprit=DP;ANN=CAAAAAAAA|sequence_feature|MODERATE|PHF8|PHF8|modified-residue:Phosphoserine|NM_001184896.1|protein_coding||c.206+6521_206+6528dupTTTTTTTT||||||,CAAAAAAAA|intron_variant|MODIFIER|PHF8|PHF8…	GT:AD:DP:GQ:PL	0/1:2,1:3:93:93,0,104
X	104464281	rs367644904	TC	T	2372.73	PASS	AC=2;AF=1.00;AN=2;DB;DP=54;ExcessHet=3.0103;FS=0.000;MLEAC=2;MLEAF=1.00;MQ=60.00;MQ0=0;POSITIVE_TRAIN_SITE;QD=28.96;SOR=0.693;VQSLOD=6.48;culprit=FS;ANN=T|splice_acceptor_variant&splice_donor_variant&intron_variant|HIGH|TEX13A|TEX13A|transcript|NM_001291277.1|protein_coding|3/4|c.595+1delG||||||,T|intron_variant|MODIFIER|IL1RAPL2|IL1RAPL2|transcript|NM_017416.1|protein_coding|3/10|c.357-14217delC…	GT:AD:DP:GQ:PL	1/1:0,54:54:99:2410,163,0
