# Supplementary material for: Comprehensive, integrated, and phased whole-genome analysis of the primary ENCODE cell line K562
Source: HighWire-hosted journal article supplement (doi:10.1101/gr.234948.118), 2019-02-08
Supplement: Supplemental_Table_S6.xlsx [file Supplemental_Table_S6.xlsx]

## Sheet: SNVs
hg19 reference; 1-based genomic coordinate counting
Table S6. K562 SNV & COSMIC Variant Overlap
Chr.	Location	Variant (ref>alt)	Class	HGVS.p	Impact	Gene Symbol	Gene Name	dbSNP	COSMIC ID	Notes
1	6196598	A>G	Missense variant	p.Phe892Ser	Moderate	CHD5	Tail-anchored protein insertion receptor WRB	None	COSM1667097
1	10713923	G>T	Missense variant	p.Leu731Met	Moderate	CASZ1	Zinc finger protein castor homolog 1	None	COSM2116294
1	40125046	G>A	Missense variant	p.Ala285Val	Moderate	NT5C1A	Cytosolic 5'-nucleotidase 1A	None	COSM1667456
1	41453053	A>T	Missense variant	p.His116Leu	Moderate	CTPS1	CTP synthase 1	None	COSM1667475/COSM1667476
1	79356879	A>C	Missense variant	p.Leu678Trp	Moderate	ADGRL4	Adhesion G protein-coupled receptor L4	None	COSM1667653
1	82447636	C>G	Missense variant	p.Ile1069Met	Moderate	ADGRL2	Adhesion G protein-coupled receptor L2	None	COSM1667662/COSM1667661
1	92446579	C>T	Stop gained	p.Arg536*	High	BRDT	Bromodomain testis-specific protein	None	COSM1667707
1	99772444	C>A	Missense variant	p.Arg724Ser	Moderate	PLPPR4	Phospholipid phosphatase-related protein type 4	None	COSM1667731
1	145109583	C>A	Missense variant	p.Thr82Lys	Moderate	SEC22B	Vesicle-trafficking protein SEC22b	rs2794053	COSN15635947/COSN15645118/COSN15643461/COSN15634296/COSN15637678/COSN15629698/COSN15640210/ COSN15628855/COSN15641837/COSN15644312/COSN15642641/COSN15646816/COSN15635130/COSN15645979/ COSN15632308/COSN15639380/COSN15638516/COSN15628028/COSN15630547/COSN15636823/COSN15631382/ COSN15641051/COSN15633403
1	155260401	C>T	Missense variant	p.Gly563Ser	Moderate	PKLR	Pyruvate kinase PKLR	None	COSM1668031
1	159505704	G>C	Missense variant	p.Leu32Val	Moderate	OR10J5	Olfactory receptor 10J5	None	COSM1668125
1	160340860	G>T	Missense variant	p.Lys113Asn	Moderate	NHLH1	Helix-loop-helix protein 1	None	COSM1668139
1	202104836	G>T	Structural interaction variant	None	High	ARL8A	ADP-ribosylation factor-like protein 8A	None	COSM1668374/COSM1668374
1	202104836	G>T	Missense variant, splice region variant	p.Pro124Gln	Moderate	ARL8A	ADP-ribosylation factor-like protein 8A	None	COSM1668374/COSM1668374
1	202566001	C>T	Missense variant	p.Gly382Ser	Moderate	SYT2	Synaptotagmin-2	None	COSM1668377
1	228596421	G>C	Stop gained	p.Tyr305*	High	TRIM17	E3 ubiquitin-protein ligase TRIM17	None	COSM1668541
1	235860410	G>T	Missense variant	p.Leu3513Ile	Moderate	LYST	Lysosomal-trafficking regulator	None	COSM1668581
1	243858956	C>A	Stop gained	p.Gly37*	High	AKT3	RAC-gamma serine/threonine-protein kinase	None	COSM1668624/COSM1668625/COSM1668626
2	46602945	C>T	Stop gained	p.Gln335*	High	EPAS1	Endothelial PAS domain-containing protein 1	None	COSM1668893/COSM1668893
2	46602945	C>T	Protein protein contact	None	High	EPAS1	Endothelial PAS domain-containing protein 1	None	COSM1668893/COSM1668893
2	80096984	C>T	Stop gained	p.Gln170*	High	CTNNA2	Catenin alpha-2	None	COSM1669099/COSM1669098
2	103317572	C>T	Missense variant	p.Arg544Trp	Moderate	SLC9A2	Sodium/hydrogen exchanger 2	None	COSM1669186
2	112621109	A>T	Sequence feature	None	Moderate	ANAPC1	Anaphase-promoting complex subunit 1	rs11687898	COSN8607009
2	160304865	A>C	Missense variant	p.Phe130Leu	Moderate	BAZ2B	Bromodomain adjacent to zinc finger domain protein 2B	None	COSM1669320
2	176973733	G>A	Missense variant	p.Glu294Lys	Moderate	HOXD11	Homeobox protein Hox-D11	None	COSM1669426
2	179634539	C>G	Missense variant	p.Met2923Ile	Moderate	TTN	Titin	None	COSM1669480/COSM1669478/COSM1669477/COSM1669481/COSM1669476/COSM1669479
2	183050660	A>C	Missense variant	p.Ile512Ser	Moderate	PDE1A	Calmodulin-dependent 3',5'-cyclic nucleotide phosphodiesterase 1A	None	COSM1669571/COSM1669573/COSM1669572/COSM1669574
2	211070475	C>A	Missense variant	p.Ala217Ser	Moderate	ACADL	Long-chain specific acyl-CoA dehydrogenase, mitochondrial	None	COSM1669713
3	3194255	G>A	Missense variant	p.Pro345Ser	Moderate	CRBN	Protein cereblon	None	COSM1669926
3	12046131	A>C	Missense variant	p.Thr36Pro	Moderate	SYN2	Synapsin-2	rs74213196	COSN15639961/COSN15636569/COSN15628620/COSN15634887/COSN15641606/COSN15644855/COSN15627785/ COSN15646578/COSN15630308/COSN23987666/COSN15638246/COSN15640802/COSN15637430/COSN15645746/ COSN15629450/COSN15642419/COSN15633130/COSN15634051
3	12046168	A>C	Stop lost	p.Ter48Serext*?	High	SYN2	Synapsin-2	rs2623875	COSN23987670
3	17052450	C>A	Missense variant	p.Leu534Ile	Moderate	PLCL2	Inactive phospholipase C-like protein 2	None	COSM1670000/COSM1669999
3	25542776	G>T	Missense variant	p.Arg144Leu	Moderate	RARB	Retinoic acid receptor beta	None	COSM1670011/COSM1670010
3	37323579	C>A	Missense variant	p.Ser120Tyr	Moderate	GOLGA4	Golgin subfamily A member 4	None	COSM1670051
3	52257401	G>A	Stop gained	p.Arg311*	High	TLR9	Toll-like receptor 9	None	COSM1670242
3	69230253	G>A	Missense variant	p.Ser883Leu	Moderate	FRMD4B	FERM domain-containing protein 4B	None	COSM2784591/COSM2784592
3	112299491	C>A	Missense variant	p.Ala176Glu	Moderate	SLC35A5	Probable UDP-sugar transporter protein SLC35A5	None	COSM1670429
3	125271109	C>A	Stop gained	p.Glu524*	High	OSBPL11	Oxysterol-binding protein-related protein 11	None	COSM1670531
3	172607438	G>T	Missense variant	p.Phe544Leu	Moderate	SPATA16	Spermatogenesis-associated protein 16	None	COSM1670708
4	1941422	C>T	Stop gained	p.Arg600*	High	WHSC1	Histone-lysine N-methyltransferase NSD2	None	COSM1670852/COSM1670851
4	3076659	A>C	Missense variant	p.Gln36Pro	Moderate	HTT	Sodium-dependent serotonin transporter	None	COSM5471879
4	3076665	A>C	Missense variant	p.Gln38Pro	Moderate	HTT	Sodium-dependent serotonin transporter	rs61792466	COSM5423676
4	156839346	G>T	Missense variant	p.Gly341Val	Moderate	TDO2	Tryptophan 2,3-dioxygenase	None	COSM1671388
5	50680451	T>A	Missense variant	p.Asp35Glu	Moderate	ISL1	Insulin gene enhancer protein ISL-1	None	COSM1671635
5	50680563	A>T	Missense variant, splice region variant	p.Arg73Trp	Moderate	ISL1	Insulin gene enhancer protein ISL-1	None	COSM1671636
5	74412489	G>A	Missense variant	p.Arg1296Trp	Moderate	ANKRD31	Putative ankyrin repeat domain-containing protein 31	None	COSM5542590
5	123983033	C>G	Missense variant	p.Gly1015Ala	Moderate	ZNF608	Zinc finger protein 608	None	COSM3135351
5	137735578	G>T	Missense variant	p.Gly1026Cys	Moderate	KDM3B	Lysine-specific demethylase 3B	None	COSM589489
5	140347253	C>G	Missense variant	p.Ser301Trp	Moderate	PCDHAC2	Protocadherin alpha-C2	None	COSM1671948
5	140431512	C>A	Missense variant	p.Pro153Thr	Moderate	PCDHB1	Protocadherin beta-1	None	COSM1671950
5	171583747	C>T	Missense variant	p.Glu68Lys	Moderate	STK10	Serine/threonine-protein kinase 10	None	COSM1672129
6	117715410	C>A	Missense variant	p.Arg360Ile	Moderate	ROS1	Proto-oncogene tyrosine-protein kinase ROS	None	COSM1072618/COSM1072620/COSM1672712
7	27204503	C>T	Missense variant	p.Asp192Asn	Moderate	HOXA9	Homeobox protein Hox-A9	None	COSM1673076
7	36910028	C>A	Missense variant	p.Met625Ile	Moderate	ELMO1	Engulfment and cell motility protein 1	None	*COSM3638481/COSM4898066		COSM3638481/COSM4898066 are different variants (C>T)
7	48318478	C>A	Missense variant	p.Gln2563Lys	Moderate	ABCA13	ATP-binding cassette sub-family A member 13	None	COSM3264571/COSM3264570
7	82544404	C>T	Missense variant	p.Gly4300Arg	Moderate	PCLO	Protein piccolo	None	*COSM5657254/COSM5657252/COSM5657253		COSM5657254/COSM5657252/COSM5657253 are different variants (C>A)
7	82581620	C>A	Missense variant	p.Trp2883Cys	Moderate	PCLO	Protein piccolo	None	COSM3030913/COSM4363757/COSM3030912/COSM3030911
7	100549512	A>T	Missense variant	p.Gln31His	Moderate	MUC3A	Mucin-3A	rs77667788	COSM4161416
7	100549516	C>A	Missense variant	p.Pro33Thr	Moderate	MUC3A	Mucin-3A	rs76951301	COSM4161417
7	100549537	G>A	Missense variant	p.Ala40Thr	Moderate	MUC3A	Mucin-3A	rs75781078	COSM4161419
7	100549540	A>C	Missense variant	p.Ser41Arg	Moderate	MUC3A	Mucin-3A	None	COSM4161420
7	100549547	T>C	Missense variant	p.Val43Ala	Moderate	MUC3A	Mucin-3A	rs77743944	COSM4161422
7	100549573	G>T	Missense variant	p.Asp52Tyr	Moderate	MUC3A	Mucin-3A	rs73163748	COSM4161424
7	100549583	G>A	Missense variant	p.Gly55Glu	Moderate	MUC3A	Mucin-3A	rs73163749	COSM4161425
7	100549592	T>A	Missense variant	p.Leu58His	Moderate	MUC3A	Mucin-3A	rs73163750	COSM4161426
7	100549894	T>C	Missense variant	p.Ser159Pro	Moderate	MUC3A	Mucin-3A	rs78007565	COSM5428360
7	100549935	T>G	Missense variant	p.Ser172Arg	Moderate	MUC3A	Mucin-3A	rs73714229	COSM4161430
7	100549942	T>C	Missense variant	p.Ser175Pro	Moderate	MUC3A	Mucin-3A	rs73714230	COSM4161431
7	100551646	A>G	Missense variant	p.Thr743Ala	Moderate	MUC3A	Mucin-3A	rs77153975	COSM1622102/COSM1622101
7	100551662	C>T	Missense variant	p.Thr748Met	Moderate	MUC3A	Mucin-3A	rs78684063	COSM1622104/COSM1622103
7	100551692	C>T	Missense variant	p.Ala758Val	Moderate	MUC3A	Mucin-3A	rs73714242	COSM5460246/COSM5460245
7	100551719	C>T	Missense variant	p.Thr767Met	Moderate	MUC3A	Mucin-3A	rs73714243	COSM4595526/COSM4595527
7	100551778	G>A	Missense variant	p.Val787Met	Moderate	MUC3A	Mucin-3A	rs73714247	COSM4597516/COSM4597517
7	100551793	G>T	Missense variant	p.Val792Phe	Moderate	MUC3A	Mucin-3A	rs73398735	COSM4597519/COSM4597520
7	100551842	C>T	Missense variant	p.Thr808Ile	Moderate	MUC3A	Mucin-3A	rs75365561	COSM4161507/COSM4161506
7	100552018	T>G	Missense variant	p.Ser867Ala	Moderate	MUC3A	Mucin-3A	rs76249962	COSM304010/COSM304009
7	100552371	C>G	Missense variant	p.Ile984Met	Moderate	MUC3A	Mucin-3A	rs73714255	COSM4594900/COSM4594901
7	100552384	A>G	Missense variant	p.Thr989Ala	Moderate	MUC3A	Mucin-3A	rs75597914	COSM4594643/COSM4594642
7	100552390	T>C	Missense variant	p.Tyr991His	Moderate	MUC3A	Mucin-3A	rs73714257	COSM4595305/COSM4595306
7	100552412	T>C	Missense variant	p.Met998Thr	Moderate	MUC3A	Mucin-3A	rs73714259	COSM4595308/COSM4595309
7	100552435	T>A	Missense variant	p.Ser1006Thr	Moderate	MUC3A	Mucin-3A	rs76244845	COSM304012/COSM304011
7	100552436	C>T	Missense variant	p.Ser1006Leu	Moderate	MUC3A	Mucin-3A	rs78685360	COSM304014/COSM304013
7	100552535	G>A	Missense variant	p.Ser1039Asn	Moderate	MUC3A	Mucin-3A	rs73163758	COSM5925368/COSM5925367
7	100552549	C>A	Missense variant	p.Leu1044Ile	Moderate	MUC3A	Mucin-3A	rs73163760	COSM3831359/COSM3831360
7	100552657	A>G	Missense variant	p.Thr1080Ala	Moderate	MUC3A	Mucin-3A	rs75471530	COSM4161522/COSM4161523
7	100552675	C>T	Missense variant	p.Pro1086Ser	Moderate	MUC3A	Mucin-3A	rs73163764	COSM4593195/COSM4593196
7	100552711	T>A	Missense variant	p.Ser1098Thr	Moderate	MUC3A	Mucin-3A	rs75799835	COSM4593973/COSM4593972
7	100552727	G>C	Missense variant	p.Arg1103Pro	Moderate	MUC3A	Mucin-3A	rs74529310	COSM4593817/COSM4593816
7	100552738	C>T	Stop gained	p.Gln1107*	High	MUC3A	Mucin-3A	rs79874934	COSM4161527/COSM4161526
7	100552739	A>G	Missense variant	p.Gln1107Arg	Moderate	MUC3A	Mucin-3A	rs75517157	COSM4161528/COSM4161529
7	100607871	C>T	Missense variant	p.Ala1283Val	Moderate	MUC3A	Mucin-3A	rs6960868	COSM5426489/COSM5426490
7	100608370	A>C	Splice donor variant, intron variant	None	High	MUC3A	Mucin-3A	rs73714276	COSM1599879/COSM1599880
7	107696359	C>T	Missense variant	p.Cys1158Tyr	Moderate	LAMB4	Laminin subunit beta-4	None	COSM1673451
7	131870165	C>A	Missense variant	p.Met1017Ile	Moderate	PLXNA4	Plexin-A4	None	*COSM1739395/COSM1739396		COSM1739395/COSM1739396 are different variants (C>T)
8	27690580	C>G	Missense variant	p.Lys17Asn	Moderate	PBK	Lymphokine-activated killer T-cell-originated protein kinase	None	*COSM749930/COSM749931/COSM5224719/COSM5224720		COSM749930/COSM749931/COSM5224719/COSM5224720 are different variants (C>T & C>CT)
8	30699840	C>A	Missense variant	p.Val2232Phe	Moderate	TEX15	Testis-expressed sequence 15 protein	None	COSM1673833
8	41790109	G>A	Missense variant	p.Arg1877Cys	Moderate	KAT6A	Histone acetyltransferase KAT6A	None	COSM1673880
8	49832477	T>A	Missense variant	p.Gln201His	Moderate	SNAI2	Zinc finger protein SNAI2	None	COSM1673895
8	104427330	A>C	Missense variant	p.Ser38Arg	Moderate	DCAF13	DDB1- and CUL4-associated factor 13	None	COSM1674056
8	113562916	A>C	Missense variant	p.Phe1516Leu	Moderate	CSMD3	CUB and sushi domain-containing protein 3	None	COSM1674108/COSM1674109
8	125072530	A>T	Missense variant, splice region variant	p.Glu995Val	Moderate	FER1L6	Fer-1-like protein 6	None	COSM1674161
9	131708816	G>A	Missense variant	p.Ser256Phe	Moderate	DOLK	Dolichol kinase	None	COSM1674884
9	134497322	G>C	Missense variant	p.Thr590Arg	Moderate	RAPGEF1	Rap guanine nucleotide exchange factor 1	None	*COSM379492/COSM5743367/COSM379493		COSM379492/COSM5743367/COSM379493 are different variants (G>A)
9	139222174	T>C	Missense variant	p.Val8Ala	Moderate	GPSM1	G-protein-signaling modulator 1	rs28495820	COSM4163535
9	139413165	C>A	Missense variant	p.Gly326Val	Moderate	NOTCH1	Neurogenic locus notch homolog protein 1	None	COSM1674971/COSM1674972
10	75865066	A>G	Missense variant	p.Met797Val	Moderate	VCL	Vinculin	None	COSM1675360
10	102051084	T>G	Missense variant	p.Met661Leu	Moderate	PKD2L1	Polycystic kidney disease 2-like 1 protein	None	*COSM3930892		COSM3930892 is a different variants (T>A)
10	115608928	C>T	Missense variant	p.Glu646Lys	Moderate	DCLRE1A	DNA cross-link repair 1A protein	None	COSM1675569
10	120810736	T>A	Missense variant	p.Lys765Ile	Moderate	EIF3A	Eukaryotic translation initiation factor 6	None	COSM1675606
11	1213272	A>C	Missense variant	p.Gln794Pro	Moderate	MUC5AC	Mucin-5AC	rs78252457	COSN19649737/COSN20560623/COSN19615228/COSN19632208
11	1213281	C>T	Missense variant	p.Ser797Leu	Moderate	MUC5AC	Mucin-5AC	rs75618268	COSN20561980/COSN19615229
11	1213416	G>A	Missense variant	p.Arg842Gln	Moderate	MUC5AC	Mucin-5AC	rs78511643	COSN19645797/COSN19639852
11	1213461	T>G,C	Missense variant	p.Val857Gly	Moderate	MUC5AC	Mucin-5AC	rs61867534	COSN20512603/COSN20512603
11	1213461	T>G,C	Missense variant	p.Val857Ala	Moderate	MUC5AC	Mucin-5AC	rs61867534	COSN20512603/COSN20512603
11	1481930	A>G	Missense variant	p.Thr760Ala	Moderate	BRSK2	Serine/threonine-protein kinase BRSK2	rs4963048	COSM5482833/COSM4145564
11	16340147	G>A	Missense variant	p.Thr110Ile	Moderate	SOX6	Transcription factor SOX-6	None	COSM1675861/COSM1675862
11	48347267	T>C	Missense variant	p.Cys259Arg	Moderate	OR4C3	Olfactory receptor 4C3	rs73465910	COSM4591940
11	48347306	G>T	Missense variant	p.Val272Phe	Moderate	OR4C3	Olfactory receptor 4C3	rs73465911	COSM4591571
11	48366958	T>G	Missense variant	p.Arg287Ser	Moderate	OR4C45	Olfactory receptor 4C45	rs76319939	COSN15638438/COSN15632191/COSN15628790/COSN15642575/COSN15636749/COSN15637608/COSN15645915/ COSN15635878/COSN15641776/COSN15643388/COSN15640129/COSN15639314/COSN15629624/COSN15627956/ COSN15631314/COSN15645048/COSN15635055/COSN15640992/COSN15634231/COSN15630479/COSN15633318/ COSN15644253/COSN15646748
11	48366971	G>C	Missense variant	p.Pro283Arg	Moderate	OR4C45	Olfactory receptor 4C45	rs75689989	COSN229010/COSN15642740/COSN15646100/COSN15645236/COSN15637773/COSN15628958/COSN15641947/ COSN15636946/COSN15636062/COSN15630661/COSN15644426/COSN15628144/COSN15640329/COSN15629815/ COSN15643585/COSN15634410/COSN15638635/COSN15635230/COSN15646931/COSN15631494/COSN15633517/ COSN15639507/COSN15632493/COSN15641162
11	48366972	G>A	Missense variant	p.Pro283Ser	Moderate	OR4C45	Olfactory receptor 4C45	rs75621879	COSN15632492
11	48367097	A>G	Missense variant	p.Ile241Thr	Moderate	OR4C45	Olfactory receptor 4C45	rs73453179	COSN15646455/COSN15632997/COSN15630198/COSN15641495/COSN15633936/COSN15647256/COSN15642300/ COSN229008/COSN15643077/COSN15640702/COSN15639847/COSN15631014/COSN15629325/COSN15628504/ COSN15637313/COSN15635604/COSN23023702/COSN15631846/COSN15645627/COSN15643981/COSN15636445/ COSN15644747/COSN19640041/COSN15639025/COSN15634773/COSN15638123
11	48367155	T>A	Missense variant	p.Thr222Ser	Moderate	OR4C45	Olfactory receptor 4C45	rs75315666	COSN15638414/COSN15646735/COSN20346391/COSN15635856/COSN15637590/COSN19767496/COSN15635034/ COSN15632160/COSN19709709/COSN15630459/COSN15627937/COSN15633294/COSN15639294/COSN19674435/ COSN15645894/COSN15642559/COSN15640970/COSN15644233/COSN15631295/COSN15640109/COSN15628769/ COSN15634215/COSN15643366/COSN15636727/COSN15645028/COSN15641756/COSN15629602
11	48367163	A>G	Missense variant	p.Phe219Ser	Moderate	OR4C45	Olfactory receptor 4C45	rs74650698	COSN15641486/COSN15636433/COSN15631003/COSN15632985/COSN19773193/COSN15642289/COSN15634764/ COSN15630185/COSN15633926/COSN15639017/COSN19674437/COSN15628495/COSN15637303/COSN15645616/ COSN15640691/COSN15646446/COSN15643969/COSN15629313/COSN15647246/COSN15635594/COSN19709711/ COSN15639838/COSN15644738/COSN15643068/COSN15638113/COSN15631838
11	48367190	A>T	Missense variant	p.Val210Asp	Moderate	OR4C45	Olfactory receptor 4C45	rs78661795	COSN19747755/COSN15642287/COSN15636431/COSN15629311/COSN15644735/COSN15635591/COSN15633922/ COSN23023703/COSN15640689/COSN15643066/COSN23020907/COSN15641483/COSN15630183/COSN15631834/ COSN23020687/COSN15647244/COSN23019324/COSN15639836/COSN15628492/COSN23021500/COSN15638111/ COSN15632980/COSN15631001/COSN19710292/COSN15639015/COSN15645612/COSN15634762/COSN15643965/ COSN15646444/COSN19674438/COSN1…
11	48367195	C>T	Missense variant	p.Met208Ile	Moderate	OR4C45	Olfactory receptor 4C45	rs79063955	COSN20397248/COSN15642909/COSN23020428/COSN15631669/COSN15644587/COSN15640511/COSN15637128/ COSN15636249/COSN15628323/COSN15638822/COSN15645422/COSN23020906/COSN15634584/COSN15635414/ COSN23023701/COSN15639675/COSN23023348/COSN15642115/COSN19674439/COSN15637947/COSN15632730/ COSN15629142/COSN23019323/COSN15641328/COSN15643781/COSN23021499/COSN15629987/COSN15647096/ COSN15630827/COSN15646280/COSN1…
11	48367311	T>C	Missense variant	p.Asn170Asp	Moderate	OR4C45	Olfactory receptor 4C45	rs73453180	COSN15644211/COSN15638389/COSN19614073/COSN15645008/COSN15628752/COSN15635013/COSN15632124/ COSN15646712/COSN15637568/COSN15631269/COSN15636703/COSN15627914/COSN15641734/COSN15634194/ COSN15643342/COSN15642539/COSN15640087/COSN15629582/COSN15639269/COSN15640949/COSN15633277/ COSN15635836/COSN15645874/COSN15630444
11	48367419	G>A	Missense variant	p.Pro134Ser	Moderate	OR4C45	Olfactory receptor 4C45	rs77576379	COSN15646018/COSN15636867/COSN15644352/COSN15634340/COSN15646867/COSN15628895/COSN15629733/ COSN15633434/COSN15632376/COSN15635163/COSN19632455/COSN15641871/COSN15630583/COSN15641083/ COSN15628066/COSN15640247/COSN15643516/COSN15635979/COSN16302481/COSN19658274/COSN15642672/ COSN20088404/COSN15645156/COSN20487267/COSN8407262/COSN20397264/COSN15638559/COSN15639422/ COSN15631421/COSN15637714
11	48367424	C>G	Missense variant	p.Ser132Thr	Moderate	OR4C45	Olfactory receptor 4C45	rs77976451	COSN15643733/COSN20088405/COSN15635365/COSN15634536/COSN15636194/COSN15638779/COSN15647054/ COSN15645375/COSN15633676/COSN15628274/COSN15632664/COSN23024029/COSN15637905/COSN15640469/ COSN15630781/COSN15637077/COSN15646233/COSN15629102/COSN15642864/COSN16302444/COSN15642077/ COSN15641280/COSN15644547/COSN8407263/COSN15629943/COSN15639638/COSN15631620
11	48367470	G>A	Missense variant	p.His117Tyr	Moderate	OR4C45	Olfactory receptor 4C45	rs80201516	COSN19619657/COSN15637701/COSN23987793/COSN15628883/COSN15641073/COSN15646007/COSN15639408/ COSN15628055/COSN23987296/COSN15630571/COSN15633422/COSN15638541/COSN15635151/COSN23987142/ COSN15642656/COSN23987408/COSN15629720/COSN15640234/COSN23987285/COSN15645141/COSN15632351/ COSN23987298/COSN15641859/COSN15646850/COSN15634324/COSN15644335/COSN15636854/COSN15635968/ COSN15631407/COSN15643496
11	48373748	C>G	Missense variant	p.Lys84Asn	Moderate	OR4C45	Olfactory receptor 4C45	rs73453188	COSN15642041/COSN15638741/COSN15629901/COSN15647011/COSN15629056/COSN15631576/COSN15636151/ COSN15632611/COSN15635331/COSN229011/COSN15640429/COSN15637032/COSN15628231/COSN15643689/ COSN19646090/COSN15630742/COSN15641242/COSN15639601/COSN15642833/COSN15644513/COSN15645334/ COSN19632642/COSN15633633/COSN15646191/COSN15634498/COSN15637862/COSN19729398
11	48373770	T>A	Missense variant	p.Asn77Ile	Moderate	OR4C45	Olfactory receptor 4C45	rs73453191	COSN15629513/COSN15628689/COSN19632589/COSN15637496/COSN15640019/COSN15632029/COSN19695987/ COSN15639198/COSN15633201/COSN15634948/COSN15636624/COSN15630373/COSN15640874/COSN15644152/ COSN15634121/COSN15643260/COSN15645808/COSN15627845/COSN15644930/COSN15631208/COSN15641667/ COSN15635777/COSN15638315/COSN15642478/COSN229012/COSN15646639
11	48373797	C>T	Missense variant	p.Cys68Tyr	Moderate	OR4C45	Olfactory receptor 4C45	rs72896825	COSN15646997/COSN15629888/COSN15639588/COSN15638722/COSN15644499/COSN15635313/COSN15631563/ COSN15634482/COSN15640417/COSN15629043/COSN15645322/COSN19696090/COSN15642818/COSN15643671/ COSN23019997/COSN15636133/COSN15642029/COSN15633612/COSN15630728/COSN15628215/COSN15646174/ COSN15632590/COSN15641227/COSN15637846/COSN15637024/COSN23022989
11	48373815	A>G	Missense variant	p.Phe62Ser	Moderate	OR4C45	Olfactory receptor 4C45	rs74350365	COSN15628411/COSN15630918/COSN15640614/COSN15635509/COSN15631755/COSN15645523/COSN19696224/ COSN15644662/COSN15633836/COSN15647172/COSN15637211/COSN15646372/COSN15638039/COSN15636346/ COSN15630101/COSN15639769/COSN15642205/COSN15643876/COSN15641411/COSN15632850/COSN15629235/ COSN15638926/COSN15634674/COSN1133798
11	48373820	A>C	Stop gained	p.Tyr60*	High	OR4C45	Olfactory receptor 4C45	rs3898634	COSN15632848/COSN15630098/COSN15641408/COSN15638036/COSN15635504/COSN15642203/COSN15644660/ COSN19696366/COSN15629232/COSN15630916
11	48373833	G>A	Missense variant	p.Ser56Phe	Moderate	OR4C45	Olfactory receptor 4C45	rs75965588	COSN15644285/COSN15643431/COSN19696705/COSN15632257/COSN15646782/COSN15641811/COSN15642617/ COSN15631351/COSN15640172/COSN15641032/COSN6407036/COSN15628821/COSN15635095/COSN15637645/ COSN15638485/COSN15630512/COSN15636790/COSN15633369/COSN15639356/COSN15629664/COSN15635915/ COSN15645949/COSN15627998/COSN15645088/COSN15634267
11	48373834	A>G	Missense variant	p.Ser56Pro	Moderate	OR4C45	Olfactory receptor 4C45	rs75261463	COSN15633826/COSN15632838/COSN15637204/COSN15638029/COSN15642988/COSN7465024/COSN15635500/ COSN15642198/COSN15641405/COSN15630910/COSN15646365/COSN15630094/COSN15644659/COSN15639761/ COSN15634669/COSN15636340/COSN15640605/COSN15629228/COSN15631749/COSN15645516/COSN15643873/ COSN15647165/COSN15628405/COSN19696648/COSN15638917
11	48373885	A>G	Missense variant	p.Phe39Leu	Moderate	OR4C45	Olfactory receptor 4C45	rs76292854	COSN19646994/COSN15632809/COSN15642974/COSN15628381/COSN229009/COSN15643852/COSN15647146/ COSN15637187/COSN20088406/COSN15640584/COSN20433394/COSN15636316/COSN20120531/COSN15638897/ COSN15645488/COSN15638009/COSN15646344/COSN15629206/COSN15634649/COSN15635485/COSN15631729/ COSN15644640/COSN15630884/COSN15630066/COSN15633797/COSN15642183/COSN15641386/COSN15639742
11	48373986	A>G	Missense variant	p.Ile5Thr	Moderate	OR4C45	Olfactory receptor 4C45	rs12420054	COSN15644651/COSN15631741/COSN15637198/COSN17153773/COSN15636331/COSN15646360/COSN15630902/ COSN15638912/COSN15634664/COSN15630084/COSN15647160/COSN15643869/COSN15628395/COSN15639754/ COSN15642193/COSN15638023/COSN15632829/COSN15633816/COSN15645507/COSN15635498/COSN15629222/ COSN15642985/COSN15640600/COSN15641399
11	56143250	G>A	Missense variant	p.Ala51Thr	Moderate	OR8U8	Olfactory receptor 8U8	rs76390346	COSM4601198
11	56143250	G>A	Missense variant	p.Ala51Thr	Moderate	OR8U1	Olfactory receptor 8U1	rs76390346	COSM4601198
11	56143257	C>A	Missense variant	p.Thr53Lys	Moderate	OR8U8	Olfactory receptor 8U8	rs77515824	COSM4145831
11	56143257	C>A	Missense variant	p.Thr53Lys	Moderate	OR8U1	Olfactory receptor 8U1	rs77515824	COSM4145831
11	56143539	T>C	Missense variant	p.Val147Ala	Moderate	OR8U8	Olfactory receptor 8U8	rs75226392	COSM4145861
11	56143539	T>C	Missense variant	p.Val147Ala	Moderate	OR8U1	Olfactory receptor 8U1	rs75226392	COSM4145861
11	56143544	T>C	Missense variant	p.Tyr149His	Moderate	OR8U8	Olfactory receptor 8U8	rs78532946	COSM4145863
11	56143544	T>C	Missense variant	p.Tyr149His	Moderate	OR8U1	Olfactory receptor 8U1	rs78532946	COSM4145863
11	56143592	C>T	Missense variant	p.Arg165Cys	Moderate	OR8U8	Olfactory receptor 8U8	rs17150411	COSM1354638
11	56143592	C>T	Missense variant	p.Arg165Cys	Moderate	OR8U1	Olfactory receptor 8U1	rs17150411	COSM1354638
11	56468416	G>A	Missense variant	p.Glu185Lys	Moderate	OR9G1	Olfactory receptor 9G1	rs11228735	COSM4145898
11	56468416	G>A	Missense variant	p.Glu185Lys	Moderate	OR9G9	Olfactory receptor 9G9	rs11228735	COSM4145898
11	56468449	A>T	Missense variant	p.Ile196Phe	Moderate	OR9G1	Olfactory receptor 9G1	rs78119083	COSM4590439
11	56468449	A>T	Missense variant	p.Ile196Phe	Moderate	OR9G9	Olfactory receptor 9G9	rs78119083	COSM4590439
11	56468452	A>C	Missense variant	p.Met197Leu	Moderate	OR9G1	Olfactory receptor 9G1	rs79970235	COSM4590442
11	56468452	A>C	Missense variant	p.Met197Leu	Moderate	OR9G9	Olfactory receptor 9G9	rs79970235	COSM4590442
11	56468699	T>A	Missense variant	p.Val279Glu	Moderate	OR9G1	Olfactory receptor 9G1	rs79251113	COSM4591947
11	56468699	T>A	Missense variant	p.Val279Glu	Moderate	OR9G9	Olfactory receptor 9G9	rs79251113	COSM4591947
11	56468704	T>C	Missense variant	p.Phe281Leu	Moderate	OR9G1	Olfactory receptor 9G1	rs79288825	COSM4145899
11	56468704	T>C	Missense variant	p.Phe281Leu	Moderate	OR9G9	Olfactory receptor 9G9	rs79288825	COSM4145899
11	56468720	T>C	Missense variant	p.Leu286Pro	Moderate	OR9G1	Olfactory receptor 9G1	rs66943455	COSM4145900
11	56468720	T>C	Missense variant	p.Leu286Pro	Moderate	OR9G9	Olfactory receptor 9G9	rs66943455	COSM4145900
11	88300561	C>A	Missense variant	p.Val764Phe	Moderate	GRM5	Metabotropic glutamate receptor 5	None	COSM1676362/COSM1676363
11	92901184	G>T	Missense variant	p.Leu232Ile	Moderate	SLC36A4	Proton-coupled amino acid transporter 4	None	COSM1676371
11	99690286	T>G	Missense variant	p.Ser23Ala	Moderate	CNTN5	Contactin-5	rs10790978	COSM430127/COSM1476010
11	99690428	T>G	Missense variant	p.Leu70Arg	Moderate	CNTN5	Contactin-5	rs7125822	COSM3931469/COSM3931470
11	111156524	G>A	Stop gained	p.Trp152*	High	C11orf53	Uncharacterized protein C11orf53	None	COSM1676433
11	125875659	G>C	Missense variant	p.Arg616Gly	Moderate	CDON	Cell adhesion molecule-related/down-regulated by oncogenes	None	COSM1676571
11	130319580	C>A	Missense variant	p.Leu238Met	Moderate	ADAMTS15	A disintegrin and metalloproteinase with thrombospondin motifs 15	None	COSM1676594
11	130780225	C>A	Missense variant	p.Leu618Phe	Moderate	SNX19	Sorting nexin-19	rs681982	COSM4591206
12	6161758	C>T	Missense variant	p.Gly713Ser	Moderate	VWF	von Willebrand factor	None	COSM1676658
12	80672819	G>T	Missense variant	p.Arg925Leu	Moderate	OTOGL	Otogelin-like protein	None	*COSM5985875	COSM5985875 is a different variant (G>A)
12	83290161	C>A	Missense variant	p.Pro407Thr	Moderate	TMTC2	Transmembrane and TPR repeat-containing protein 2	None	COSM1677225
12	88500799	C>G	Missense variant	p.Asp854His	Moderate	CEP290	Centrosomal protein of 290 kDa	None	*COSM5012596	COSM5012596 is a different variant (C>A)
12	132635892	C>A	Missense variant	p.Ala351Asp	Moderate	NOC4L	Nucleolar complex protein 4 homolog	rs1132100	COSM1677495
13	26151235	C>G	Missense variant	p.Arg581Gly	Moderate	ATP8A2	Phospholipid-transporting ATPase IB	None	COSM1677561
13	33110869	G>T	Stop gained	p.Ser99*	High	N4BP2L2	NEDD4-binding protein 2-like 2	None	COSM1677597
13	33629273	C>A	Missense variant	p.Arg474Ser	Moderate	KL	Klotho	None	COSM1677603
13	42793387	G>T	Stop gained	p.Glu1079*	High	DGKH	Diacylglycerol kinase eta	None	COSM1677633
14	36003525	G>A	Missense variant	p.Glu23Lys	Moderate	INSM2	Insulinoma-associated protein 2	None	COSM1677943
14	64886621	C>A	Missense variant	p.Asp235Glu	Moderate	MTHFD1	C-1-tetrahydrofolate synthase, cytoplasmic	None	COSM1678055
15	62360485	C>G	Missense variant	p.Arg225Gly	Moderate	C2CD4A	C2 calcium-dependent domain-containing protein 4A	rs146097394	COSM4128318
15	74751183	G>A	Missense variant	p.Ala49Val	Moderate	UBL7	Ubiquitin-like protein 7	None	COSM1938575
15	90611183	G>T	Missense variant	p.Asp272Tyr	Moderate	ZNF710	Zinc finger protein 710	None	*COSM416766	COSM416766 is a different variant (G>C)
16	2201591	G>A	Missense variant	p.Gly110Ser	Moderate	RAB26	Ras-related protein Rab-26	None	COSM1678765
16	4861709	G>C	Missense variant	p.His464Gln	Moderate	GLYR1	Putative oxidoreductase GLYR1	rs2085329	COSM4590631
16	31289311	C>T	Missense variant	p.Arg413Trp	Moderate	ITGAM	Integrin alpha-M	None	COSM2917865
16	58742130	A>C	Missense variant	p.Val413Gly	Moderate	GOT2	Aspartate aminotransferase, mitochondrial	None	COSM1679146
16	67686924	G>A	Missense variant, splice region variant	p.Ala963Thr	Moderate	CARMIL2	Capping protein, Arp2/3 and myosin-I linker protein 2	None	COSM6029746/COSM6029747
16	72829032	G>A	Missense variant	p.Pro2517Ser	Moderate	ZFHX3	Zinc finger homeobox protein 3	None	COSM1679261
17	5086818	C>A	Missense variant	p.Gly245Val	Moderate	ZNF594	Zinc finger protein 594	None	COSM1679419
17	6012940	C>A	Missense variant	p.Ala288Asp	Moderate	WSCD1	WSC domain-containing protein 1	None	COSM1679434
17	21201884	T>C	Sequence feature	None	Moderate	MAP2K3	Dual specificity mitogen-activated protein kinase kinase 3	rs2305875	COSN19701031/COSN19618738/COSN16302068/COSN19635129/COSN8866141
17	21201907	G>A	Sequence feature	None	Moderate	MAP2K3	Dual specificity mitogen-activated protein kinase kinase 3	rs2305874	COSN8866142/COSN16301883/COSN19664820/COSN6655157
17	21202056	G>A	Sequence feature	None	Moderate	MAP2K3	Dual specificity mitogen-activated protein kinase kinase 3	rs34676150	COSN19626116/COSN19694203/COSN19632474
17	21202063	G>C	Sequence feature	None	Moderate	MAP2K3	Dual specificity mitogen-activated protein kinase kinase 3	rs77850849	COSN19632150
17	21202067	A>G	Sequence feature	None	Moderate	MAP2K3	Dual specificity mitogen-activated protein kinase kinase 3	rs76764437	COSN19632473/COSN19630785
17	21202078	G>A	Sequence feature	None	Moderate	MAP2K3	Dual specificity mitogen-activated protein kinase kinase 3	rs35477472	COSN19632400
17	21203893	T>C	Missense variant	p.Ser68Pro	Moderate	MAP2K3	Dual specificity mitogen-activated protein kinase kinase 3	rs34105301	COSM4591731/COSM4591730
17	21204187	G>T	Missense variant, splice region variant	p.Arg94Leu	Moderate	MAP2K3	Dual specificity mitogen-activated protein kinase kinase 3	rs56067280	COSM3773782/COSM288153/COSM5712789
17	21204192	C>T	Missense variant	p.Arg96Trp	Moderate	MAP2K3	Dual specificity mitogen-activated protein kinase kinase 3	rs56216806	COSM3773784/COSM3773783/COSM5424812
17	21204210	C>T	Stop gained	p.Gln102*	High	MAP2K3	Dual specificity mitogen-activated protein kinase kinase 3	rs55796947	COSM5426675/COSM4590822/COSM4590823
17	21215557	G>A	Missense variant	p.Arg293His	Moderate	MAP2K3	Dual specificity mitogen-activated protein kinase kinase 3	rs35206134	COSM3773789/COSM3773790
17	21217513	G>A	Missense variant	p.Val339Met	Moderate	MAP2K3	Dual specificity mitogen-activated protein kinase kinase 3	rs2363198	COSM4591059/COSM4591060
17	21318698	C>T	Missense variant	p.Ser15Leu	Moderate	KCNJ12	ATP-sensitive inward rectifier potassium channel 12	rs1657738	COSM436188
17	21318698	C>T	Missense variant	p.Ser15Leu	Moderate	KCNJ18	Inward rectifier potassium channel 18	rs1657738	COSM436188
17	21318782	G>A	Missense variant	p.Arg43His	Moderate	KCNJ12	ATP-sensitive inward rectifier potassium channel 12	rs78117732	COSM1318527
17	21318782	G>A	Missense variant	p.Arg43His	Moderate	KCNJ18	Inward rectifier potassium channel 18	rs78117732	COSM1318527
17	21318867	G>A	Missense variant	p.Met71Ile	Moderate	KCNJ12	ATP-sensitive inward rectifier potassium channel 12	rs73979893	COSM1599874
17	21318867	G>A	Missense variant	p.Met71Ile	Moderate	KCNJ18	Inward rectifier potassium channel 18	rs73979893	COSM1599874
17	21319069	G>A	Missense variant	p.Glu139Lys	Moderate	KCNJ12	ATP-sensitive inward rectifier potassium channel 12	rs76265595	COSM312196
17	21319069	G>A	Missense variant	p.Glu139Lys	Moderate	KCNJ18	Inward rectifier potassium channel 18	rs76265595	COSM312196
17	21319079	C>A	Missense variant	p.Thr142Asn	Moderate	KCNJ12	ATP-sensitive inward rectifier potassium channel 12	rs76518282	COSM4129714
17	21319079	C>A	Missense variant	p.Thr142Asn	Moderate	KCNJ18	Inward rectifier potassium channel 18	rs76518282	COSM4129714
17	21319121	C>T	Missense variant	p.Pro156Leu	Moderate	KCNJ12	ATP-sensitive inward rectifier potassium channel 12	rs1714864	COSM4590892
17	21319121	C>T	Missense variant	p.Pro156Leu	Moderate	KCNJ18	Inward rectifier potassium channel 18	rs1714864	COSM4590892
17	21319171	G>A	Missense variant	p.Asp173Asn	Moderate	KCNJ12	ATP-sensitive inward rectifier potassium channel 12	rs73313922	COSM1741567
17	21319171	G>A	Missense variant	p.Asp173Asn	Moderate	KCNJ18	Inward rectifier potassium channel 18	rs73313922	COSM1741567
17	21319208	C>T	Missense variant	p.Ala185Val	Moderate	KCNJ12	ATP-sensitive inward rectifier potassium channel 12	rs73979896	COSM3766042
17	21319208	C>T	Missense variant	p.Ala185Val	Moderate	KCNJ18	Inward rectifier potassium channel 18	rs73979896	COSM3766042
17	21319230	G>C	Missense variant	p.Gln192His	Moderate	KCNJ12	ATP-sensitive inward rectifier potassium channel 12	rs1657742	COSM436189
17	21319230	G>C	Missense variant	p.Gln192His	Moderate	KCNJ18	Inward rectifier potassium channel 18	rs1657742	COSM436189
17	21319285	C>T	Missense variant	p.Leu211Phe	Moderate	KCNJ12	ATP-sensitive inward rectifier potassium channel 12	rs72846667	COSM1600357
17	21319285	C>T	Missense variant	p.Leu211Phe	Moderate	KCNJ18	Inward rectifier potassium channel 18	rs72846667	COSM1600357
17	21319369	G>A	Missense variant	p.Glu239Lys	Moderate	KCNJ12	ATP-sensitive inward rectifier potassium channel 12	rs77048459	COSM3722241
17	21319369	G>A	Missense variant	p.Glu239Lys	Moderate	KCNJ18	Inward rectifier potassium channel 18	rs77048459	COSM3722241
17	21319943	A>G	Missense variant	p.Glu430Gly	Moderate	KCNJ12	ATP-sensitive inward rectifier potassium channel 12	rs5021699	COSM3755340
17	21319943	A>G	Missense variant	p.Glu430Gly	Moderate	KCNJ18	Inward rectifier potassium channel 18	rs5021699	COSM3755340
17	56389688	G>A	Stop gained	p.Arg832*	High	TSPOAP1	Peripheral-type benzodiazepine receptor-associated protein 1	None	COSM1679949/COSM1679948
17	58035769	G>C	Missense variant	p.Ser243Arg	Moderate	RNFT1	RING finger and transmembrane domain-containing protein 1	None	COSM1679979/COSM1679980
17	79662030	C>G	Protein protein contact	None	High	HGS	Hepatocyte growth factor-regulated tyrosine kinase substrate	None	*COSM5532306	COSM5532306 is a different variant (C>T)
17	79662030	C>G	Missense variant	p.Pro351Arg	Moderate	HGS	Hepatocyte growth factor-regulated tyrosine kinase substrate	None	*COSM5532306	COSM5532306 is a different variant (C>T)
17	80022802	T>C	Missense variant	p.Tyr45Cys	Moderate	DUS1L	tRNA-dihydrouridine(16/17) synthase [NAD(P)(+)]-like	None	COSM1680164
18	25565101	G>A	Missense variant	p.Ser691Leu	Moderate	CDH2	Cadherin-2	None	COSM1680293
18	25573588	T>C	Missense variant	p.Tyr345Cys	Moderate	CDH2	Cadherin-2	None	COSM1680294
18	50451634	C>A	Missense variant	p.Ser293Arg	Moderate	DCC	Netrin receptor DCC	None	COSM1680366
18	51715254	T>G	Missense variant	p.Gln277Pro	Moderate	MBD2	Methyl-CpG-binding domain protein 2	None	COSM1680370
19	460668	C>G	Missense variant	p.Gly110Ala	Moderate	SHC2	SHC-transforming protein 2	rs189741717	COSM4909271/COSM4132131
19	3546159	C>A	Missense variant	p.Gly401Val	Moderate	MFSD12	Major facilitator superfamily domain-containing protein 12	None	COSM1680512/COSM1680513
19	3548191	G>A	Missense variant	p.Ser195Leu	Moderate	MFSD12	Major facilitator superfamily domain-containing protein 12	None	COSM5765507/COSM5765508/COSM5765506
19	10225391	C>T	Stop gained	p.Gln788*	High	PPAN-P2RY11	HCG2039996	None	COSM1680631/COSM1680632
19	10225391	C>T	Stop gained	p.Gln368*	High	P2RY11	P2Y purinoceptor 11	None	COSM1680631/COSM1680632
19	13186485	G>C	Missense variant, splice region variant	p.Gly327Arg	Moderate	NFIX	Nuclear factor 1 X-type	None	COSM2817167/COSM5674269/COSM4278393/COSM2817168
19	35250532	C>T	Missense variant	p.Glu392Lys	Moderate	ZNF599	Zinc finger protein 599	None	COSM1680885
19	42795793	G>A	Missense variant	p.Ala1837Thr	Moderate	CIC	Protein capicua homolog	None	COSM1681079
20	1961118	G>A	Missense variant	p.Arg206Cys	Moderate	PDYN	Proenkephalin-B	None	COSM1326867
21	32007692	G>C	Missense variant	p.Cys37Ser	Moderate	KRTAP20-2	Keratin-associated protein 20-2	None	COSM1681920
21	32554909	G>T	Structural interaction variant	None	High	TIAM1	T-lymphoma invasion and metastasis-inducing protein 1	None	COSM1681924/COSM1681924/COSM1681925/COSM1681925
21	32554909	G>T	Missense variant	p.Leu906Met	Moderate	TIAM1	T-lymphoma invasion and metastasis-inducing protein 1	None	COSM1681924/COSM1681924/COSM1681925/COSM1681925
21	41414544	G>T	Missense variant	p.Leu1814Met	Moderate	DSCAM	Down syndrome cell adhesion molecule	None	COSM1681971
21	44841184	G>C	Missense variant	p.Pro188Arg	Moderate	LOC102724428	Protein LOC102724428	None	COSM1682023
21	44841184	G>C	Missense variant	p.Pro188Arg	Moderate	SIK1	Serine/threonine-protein kinase SIK1	None	COSM1682023
22	36424450	A>C	Missense variant	p.His8Gln	Moderate	RBFOX2	RNA binding protein fox-1 homolog 2	rs9607299	COSM4156193
22	43576915	G>A	Missense variant	p.Arg127Cys	Moderate	TTLL12	Tubulin--tyrosine ligase-like protein 12	None	COSM1682310
22	46930480	A>C	Missense variant	p.Met863Arg	Moderate	CELSR1	Cadherin EGF LAG seven-pass G-type receptor 1	None	COSM1682343
X	8138171	T>C	Missense variant	p.Ser108Gly	Moderate	VCX2	Variable charge X-linked protein 2	rs78723459	COSM3774039
X	47485494	G>A	Missense variant	p.Arg403Cys	Moderate	CFP	Properdin	None	COSM1682583
X	54470975	A>G	Missense variant	p.Lys190Glu	Moderate	TSR2	Pre-rRNA-processing protein TSR2 homolog	None	COSM1682644

## Sheet: Indels
hg19 reference; 1-based genomic coordinate counting
Table S6. K562 Indel & COSMIC Variant Overlap
Chr.	Location	Variant (ref>alt)	Class	HGVS.p	Impact	Gene Symbol	Gene Name	dbSNP	COSMIC ID	Notes
1	1684347	C>CCCT	Conservative inframe insertion	p.Glu590dup	Moderate	NADK	NAD kinase	rs150880809	COSM5827581/COSM1320774/COSM1320773
1	17086085	G>GC	Frameshift variant	p.Ala271fs	High	MST1L	Putative macrophage stimulating 1-like protein	rs200532237	*COSM424569/COSM424570	* COSM424569/COSM424570 are different variants (G>GN)
1	154842199	G>GGCTGCTGCTGCTGCTGCT	Conservative inframe insertion	p.Gln75 Gln80dup	Moderate	KCNN3	Small conductance calcium-activated potassium channel protein 3	None	COSM5827506
2	73308223	TTCCTCC>T	Sequence feature	None	Moderate	RAB11FIP5	Rab11 family-interacting protein 5	rs67780878	COSN519129/COSN519130
2	133076117	CA>C	Frameshift variant	p.Asn527fs	High	ZNF806	Zinc finger protein 806	rs111405036	COSN518255
2	165551295	C>CA	Frameshift variant	p.Leu974fs	High	COBLL1	Cordon-bleu protein-like 1	None	COSM4673436/COSM4673435
3	100170600	A>ATCCTAGAAGGCATTCTCATGAGGACCAGGAATTCCGATGCCGATCGTCTGACCGTCT	Disruptive inframe insertion	p.Gln74 Glu75insGluPheArgCysArgSerSerAspArgLeuProArgArgHisSerHisGluAspGln	Moderate	LNP1	Leukemia NUP98 fusion partner 1	rs71132521	COSM4603057
3	113376110	T>TTGC	Disruptive inframe insertion	p.Gln1473dup	Moderate	USF3	Basic helix-loop-helix domain-containing protein USF3	None	*COSM3119036	*COSM3119036 is a different variant (T>TTGCTGC)
3	150421527	C>CTCCTCCTCCTCCTCCACCTCT	Disruptive inframe insertion	p.Glu53 Glu54insGluValGluGluGluGluGlu	Moderate	ERICH6	Glutamate-rich protein 6	None	*COSM3774047	*COSM3774047 is a different variant (C>T)
3	195508108	G>GAGGAAGGGCTGGTGACAGGAAGAGGGGTGGTGTGACCTGTGGATGCTA	Conservative inframe insertion	p.Ser3447 Ser3448insLeuAlaSerThrGlyHisThrThrProLeuProValThrSerProSer	Moderate	MUC4	Mucin-4	None	*COSM4590602/COSM446233	*COSM4590602/COSM446233 are different variants (G>A)
3	195513413	G>GGGTGGCGTGACCTGTGGATACTGAGGAATTGTCGGTGACAGGAAGAGGGGTGGCGTGACCGGTGGATGCTGAGGAAGTGCTGGTGACAGGAAGAGA	Conservative inframe insertion	p.Thr1679 Pro1680insSerLeuProValThrSerThrSerSerAlaSerThrGlyHisAlaThrProLeuProValThrAspAsnSerSerValSerThrGlyHisAlaThr	Moderate	MUC4	Mucin-4	None	*COSM222022/COSM222021	*COSM222022/COSM222021 are different variants (G>A)
3	195513799	GTGGTGTCACCTGTGGATGCTGAGGAAGGGCTAGTGACAGGAAGAGGCA>G	Disruptive inframe deletion	p.Met1535 Thr1550del	Moderate	MUC4	Mucin-4	None	COSM150891/COSM150892
3	197880130	GGCAGCA>G	Disruptive inframe deletion	p.Gln83 Gln84del	Moderate	FAM157A	Putative protein FAM157A	None	COSM5829689
4	3076654	G>GCAA	Disruptive inframe insertion	p.Gln35dup	Moderate	HTT	Sodium-dependent serotonin transporter	None	*COSM5682533	*COSM5682533 is a different variant (G>A)
7	4785103	T>TTG	Sequence feature	None	Moderate	FOXK1	Forkhead box protein K2	rs111622709	*COSN24343795	*COSN24343795 is a different variant (T>TTTG)
7	15725797	ATGG>A	Disruptive inframe deletion	p.His77del	Moderate	MEOX2	Homeobox protein MOX-2	rs113582077	COSM150907
7	42967505	C>CAA	Sequence feature	None	Moderate	PSMA2	Proteasome subunit alpha type-2	rs10625370	*COSN24353606	*COSN24353606 is a different variant (C>CCAA)
7	141334630	C>CT	Sequence feature	None	Moderate	AGK	Acylglycerol kinase, mitochondrial	None	COSN1343844
8	10467637	T>TCCTCTAACTGCACCCTCTCTTCTTGCAGCCCTTCTATTACTTTAGTCC	Conservative inframe insertion	p.Glu1323 Glu1324insGlyThrLysValIleGluGlyLeuGlnGluGluArgValGlnLeuGlu	Moderate	RP1L1	Retinitis pigmentosa 1-like 1 protein	None	*COSM4593645	*COSM4593645 is a different variant (T>C)
8	65494007	T>TAGCGGC	Conservative inframe insertion	p.Ser223 Gly224dup	Moderate	BHLHE22	Class E basic helix-loop-helix protein 22	None	COSM1292723
9	12775861	T>TGGCGGC	Conservative inframe insertion	p.Gly54 Gly55dup	Moderate	LURAP1L	Leucine rich adaptor protein 1-like	None	COSM4603042
9	35309219	AGTGT>A	Sequence feature	None	Moderate	UNC13B	Protein unc-13 homolog B	rs5897599	COSN18751759
10	98388646	C>CATATACAT	Sequence feature	None	Moderate	PIK3AP1	Phosphoinositide 3-kinase adapter protein 1	None	*COSN6606410	*COSN6606410 is a different variant (C>T)
10	98389687	A>AAAGAAG	Sequence feature	None	Moderate	PIK3AP1	Phosphoinositide 3-kinase adapter protein 1	rs61662185	*COSN20337220	*COSN20337220 is a different variant (A>G)
10	126678122	GT>G	Frameshift variant	p.Lys974fs	High	CTBP2	C-terminal-binding protein 2	rs140913543	COSM6029619/COSM111429
11	89608808	GC>G	Frameshift variant	p.Ser126fs	High	TRIM64B	Putative tripartite motif-containing protein 64B	rs371045630	COSM4589992
11	102738793	G>GT	Frameshift variant	p.Thr211fs	High	MMP12	Macrophage metalloelastase	rs5794199	COSM1350419
12	2062323	T>TTGC	Disruptive inframe insertion	p.Gln261dup	Moderate	DCP1B	mRNA-decapping enzyme 1B	rs111543431	COSM249162/COSM5435235
12	62724538	C>CA	Sequence feature	None	Moderate	USP15	Ubiquitin carboxyl-terminal hydrolase 15	rs201549202	*COSN15594877	*COSN15594877 is a different variant (C>A)
12	122359397	G>GGAGGAGGAGGAGAAA	Disruptive inframe insertion	p.Glu65 Gly66insGluLysGluGluGlu	Moderate	WDR66	WD repeat-containing protein 66	rs142042908	COSM1359529
13	72440658	TGCCGCC>T	Frameshift variant, splice acceptor variant, splice region variant, intron variant	p.Gly81fs	High	DACH1	Dachshund homolog 1	rs5804590	COSM5502055/COSM5502056
13	78272267	T>TGG	Frameshift variant	p.Leu75fs	High	SLAIN1	SLAIN motif-containing protein 1	rs201380414	COSM5957320
15	23685004	G>GCAT	Conservative inframe insertion	p.Asp872dup	Moderate	GOLGA6L2	Golgin subfamily A member 6-like protein 2	rs34879341	COSM959881/COSM1587757/COSM1587758
15	23685064	A>ACATCTTCTCCTCCTGGCCCCGCATCTTCTCCTCCTGCTCCCG	Conservative inframe insertion	p.Ala839 Asp852dup	Moderate	GOLGA6L2	Golgin subfamily A member 6-like protein 2	None	*COSM3746368/COSM3746369	*COSM3746368/COSM3746369 are different variants (A>G)
15	78913067	ACAG>A	Conservative inframe deletion	p.Leu23del	Moderate	CHRNA3	Neuronal acetylcholine receptor subunit alpha-3	rs143833222	COSM965405
17	5286861	GTAGTGTTTGGAATTTTCTGTTCATA>G	Splice acceptor variant, 3 prime UTR variant, intron variant	None	High	RABEP1	Rab GTPase-binding effector protein 1	rs56107242	COSN20113348/COSN20113342/COSN20113346/COSN20113344/COSN20113350
17	7470285	CA>C	Frameshift variant, splice region variant	p.Lys436fs	High	SENP3	Sentrin-specific protease 3	rs58837213	COSM5713295
17	7578523	T>TG	Frameshift variant	p.Gln136fs	High	TP53	Cellular tumor antigen p53		*COSM5013840/COSM4746625/COSM5013838/COSM5013836/COSM5013835/COSM5013837/COSM45293/ COSM307335/COSM45966/COSM5013839/COSM4746623/COSM4746624/COSM4746620/COSM4746621/ COSM45123/COSM4746622/COSM45089	*All of the overlaps are different variants (T>A, TG>T, T>A, T>A, T>A, T>A, T>C, T>A, TGG>TAA, T>A, TG>T, TG>T, TG>T, TG>T, TG>T, TG>T, T>G)
17	7578523	T>TG	Structural interaction variant	None	High	TP53	Cellular tumor antigen p53		*COSM5013840/COSM4746625/COSM5013838/COSM5013836/COSM5013835/COSM5013837/COSM45293/ COSM307335/COSM45966/COSM5013839/COSM4746623/COSM4746624/COSM4746620/COSM4746621/ COSM45123/COSM4746622/COSM45089	*All of the overlaps are different variants (T>A, TG>T, T>A, T>A, T>A, T>A, T>C, T>A, TGG>TAA, T>A, TG>T, TG>T, TG>T, TG>T, TG>T, TG>T, T>G)
17	17039561	CCAG>C	Disruptive inframe deletion	p.Ser189del	Moderate	MPRIP	Myosin phosphatase Rho-interacting protein	rs113250356	COSM4594459/COSM4594459/COSM249625/COSM249625
17	17039561	CCAG>C	Sequence feature	None	Moderate	MPRIP	Myosin phosphatase Rho-interacting protein	rs113250356	COSM4594459/COSM4594459/COSM249625/COSM249625
17	21319650	CGAG>C	Conservative inframe deletion	p.Glu334del	Moderate	KCNJ12	ATP-sensitive inward rectifier potassium channel 12	None	COSM278475
17	21319650	CGAG>C	Conservative inframe deletion	p.Glu334del	Moderate	KCNJ18	Inward rectifier potassium channel 18	None	COSM278475
17	72889676	G>GGGCTCCGTAGGTTCCATGGGCTCCGTAGGTTCCATGGGCTCCGTAGGTTCCATC	Disruptive inframe insertion	p.Pro6 Met7insMetGluProThrGluProMetGluProThrGluProMetGluProThrGluPro	Moderate	FADS6	Fatty acid desaturase 6	None	COSM5959702/COSM5959703
18	51750584	T>TGCC	Conservative inframe insertion	p.Gly115dup	Moderate	MBD2	Methyl-CpG-binding domain protein 2	None	COSM4336382/COSM4336383
19	501701	G>GACACCACCTCCCCGGAGCCTCCCA	Conservative inframe insertion	p.Glu239 Ser240insProProAsnThrThrSerProGlu	Moderate	MADCAM1	Mucosal addressin cell adhesion molecule 1	rs71171990	COSM5958416
19	501743	T>TCTCCCGACACCACCTCCCAGGAGCCTCCCGACACCACCTCCCAGGAGC	Disruptive inframe insertion	p.Ser261 Pro262insGlnGluProProAspThrThrSerGlnGluProProAspThrThrSer	Moderate	MADCAM1	Mucosal addressin cell adhesion molecule 1	None	COSM4603430
21	10942924	CCTT>C	Disruptive inframe deletion	p.Arg221del	Moderate	TPTE	Putative tyrosine-protein phosphatase TPTE	rs113444703	COSM3723959/COSM3723960
X	104464281	TC>T	Splice acceptor variant, splice donor variant, intron variant	None	High	TEX13A	Testis-expressed sequence 13A protein	rs367644904	COSM3723846/COSM3723847
