# Supplementary material for: Comprehensive, integrated, and phased whole-genome analysis of the primary ENCODE cell line K562
Source: HighWire-hosted journal article supplement (doi:10.1101/gr.234948.118), 2019-02-08
Supplement: Supplemental_Table_S7.xlsx [file Supplemental_Table_S7.xlsx]

## Sheet: CENSUS
hg19 reference; 1-based genomic coordinate counting
Table S7. K562 Variant Overlaps with CENSUS
Chr	Location	Variant (ref>alt)	Class	HGVS.p	Impact	Gene Symbol	Gene Name	dbSNP
1	120461979	G>T	Missense variant	p.Pro1913Thr	Moderate	NOTCH2	Neurogenic locus notch homolog protein 2	None
2	46602945	C>T	Stop gained	p.Gln335*	High	EPAS1	Endothelial PAS domain-containing protein 1	None
2	46602945	C>T	Protein protein contact	None	High	EPAS1	Endothelial PAS domain-containing protein 1	None
2	176973733	G>A	Missense variant	p.Glu294Lys	Moderate	HOXD11	Homeobox protein Hox-D11	None
4	1941422	C>T	Stop gained	p.Arg600*	High	WHSC1	Histone-lysine N-methyltransferase NSD2	None
4	55140793	G>A	Splice donor variant, intron variant	None	High	PDGFRA	Platelet-derived growth factor receptor alpha	None
6	117715410	C>A	Missense variant	p.Arg360Ile	Moderate	ROS1	Proto-oncogene tyrosine-protein kinase ROS	None
7	27204503	C>T	Missense variant	p.Asp192Asn	Moderate	HOXA9	Homeobox protein Hox-A9	None
8	41790109	G>A	Missense variant	p.Arg1877Cys	Moderate	KAT6A	Histone acetyltransferase KAT6A	None
8	42184848	C>CTTT	Sequence feature	None	Moderate	IKBKB	Inhibitor of nuclear factor kappa-B kinase subunit beta	None
9	139413165	C>A	Missense variant	p.Gly326Val	Moderate	NOTCH1	Neurogenic locus notch homolog protein 1	None
11	119169190	G>C	Missense variant	p.Asp792His	Moderate	CBL	E3 ubiquitin-protein ligase CBL	None
14	68331678	C>CTTTTTTT	Splice acceptor variant, intron variant	None	High	RAD51B	DNA repair protein RAD51 homolog 2	None
16	72829032	G>A	Missense variant	p.Pro2517Ser	Moderate	ZFHX3	Zinc finger homeobox protein 3	None
17	5286861	GTAGTGTTTGGAATTTTCTGTTCATA>G	Splice acceptor variant, 3 prime UTR variant, intron variant	None	High	RABEP1	Rab GTPase-binding effector protein 1	rs56107242
17	7578523	T>TG	Frameshift variant	p.Gln136fs	High	TP53	Cellular tumor antigen p53	None
17	7578523	T>TG	Structural interaction variant	None	High	TP53	Cellular tumor antigen p53	None
17	37634227	G>C	Sequence feature	None	Moderate	CDK12	Cyclin-dependent kinase 12	None
19	1211459	TG>T	Sequence feature	None	Moderate	STK11	Serine/threonine-protein kinase STK11	rs113785486
19	1216833	C>CA	Sequence feature	None	Moderate	STK11	Serine/threonine-protein kinase STK11	rs34536728
19	42795793	G>A	Missense variant	p.Ala1837Thr	Moderate	CIC	Protein capicua homolog	None
