# Supplementary material for: Comprehensive, integrated, and phased whole-genome analysis of the primary ENCODE cell line K562
Source: HighWire-hosted journal article supplement (doi:10.1101/gr.234948.118), 2019-02-08
Supplement: Supplemental_Table_S8.xlsx [file Supplemental_Table_S8.xlsx]

## Sheet: WGS
hg19 reference; 1-based genomic coordinate counting
Table S8 PCR Validations of K562 SVs
Chromosome	Start Coordinate	End Coordinate	Forward/Reverse Primer	Product Size	SV	Annealing Temperature ℃	Validation	Coordinate Entry in Dataset 10	Called By
1	26460094	26464768	TTGCAGTGGTATGTGCCTGT	502	deletion		no	26460106	ARC-SV, BreakSeq, LongRanger
			GGCTCACTGCAACCTCTACAC
1	55092272	55095965	GAACTTGGGAGGTGGAGGTT	500	deletion	60	no	55092285	ARC-SV, Pindel, BreakSeq, LUMPY, LongRanger, BreakDancer
			GGCCATTATGGGCATGTTAC
1	114039826	114045876	AAACCTGACCCTTAATGAGCAA	502	deletion	55	yes	114039850	ARC-SV, BreakSeq, LongRanger, BreakDancer
			ACAGGGTCTCGCTTTGACAC
2	75626041	75628408	ATTATGGGGGTGGGTCTTTC	510	deletion	60	no	75626063	ARC-SV, LongRanger, BreakDancer
			TTGTGCATCCATTCAAACCT
2	34523653	34525718	GGGGCACTGTTGTCCAATAA	506	deletion		no	34523668	ARC-SV, Pindel, BreakSeq, LUMPY, LongRanger, BreakDancer
			CTCCCAAGTGCTGGGATTAC
3	42838355	42840809	GGTGGTGCCAGTTGGTCTAT	194	deletion	55	yes	42838362	ARC-SV, Pindel, BreakSeq, LUMPY, LongRanger
			AAAACAAACCCCCTTCTTGC
4	34345619	34347686	TGTGCAAAGAGCAAAACATGA	213	deletion	55	yes	34345637	ARC-SV, LongRanger, LUMPY, BreakDancer
			GGCGAATAGTGATGGCAGTT
5	151456412	151462446	CAGGAGCAAGGCATGAGAAG	222	deletion	55	yes	151456431	ARC-SV, Pindel, BreakSeq, LongRanger, BreakDancer
			AAGGGTTGTAAGTGTCCACCA
6	64667006	64668345	TGGAGTGTCCTTTTGCACAG	171	deletion	55	yes	64667024	ARC-SV, BreakSeq, LongRanger, BreakDancer
			AGCACTTGCTGCTTCACCTT
7	25057443	25059852	TTTAGGCCCAAATATGCAAAA	511	deletion	55	yes	25057468	ARC-SV, BreakSeq, LUMPY, LongRanger, BreakDancer
			CTTCACCCTCAGGACCACAT
8	25066676	25070650	ATGTGGTGGGGTGATGTTTT	497	deletion	55	yes	25066690	ARC-SV, Pindel, BreakSeq, LUMPY, LongRanger, BreakDancer
			GACGCACACAAAGGAAAGGT
9	71738119	71743353	TTTCCTGGTGAGGAACCTGT	496	deletion		no	71738137	ARC-SV, BreakSeq, LUMPY, BreakDancer
			GCAGGAGAATGGTGTGAACC
10	81725284	81727424	AAATTTTCACCACCCCAACA	504	deletion	55	yes	81725295	ARC-SV, LongRanger, BreakDancer
			CCGATTATCCTGACTTGACCA
11	58594187	58596018	GACTATGGCTGCCCTAAAACC	500	deletion	55	no	58594199	ARC-SV, Pindel, LUMPY, BreakSeq, LongRanger, BreakDancer
			AGCCATTTTGACCCTGAAAC
12	98669925	98672089	CAAATGGGGAAAAGGAAGGT	509	deletion	55	yes	98669941	ARC-SV, BreakSeq, LUMPY, LongRanger, BreakDancer
			AGGAATCGCCACACTGACTT
13	72477263	72480575	TCCTGGGTCCATGTGAAAAT	501	deletion	55	yes	72477276	ARC-SV, BreakSeq, Pindel, LUMPY, LongRanger, BreakDancer
			CCCTGTTCCCTTTCTTCCTC
14	61058053	61059488	TGTTTGCTTTTCCCTTCTGC	505	deletion	55	no	61058057	ARC-SV, LongRanger
			AACCTCCAGGCTCAAGGAAT
15	44137056	44138851	GACGGAGGTTGGAGTGAGTC	497	deletion		no	44137076	ARC-SV, BreakSeq, BreakDancer
			TCATGTTGTTCAGGCTGGTC
16	76539132	76544024	ACCATATGACCCAGCAATCC	495	deletion	55	yes	76539132	ARC-SV, BreakSeq, BreakDancer
			GCATACATGGATGTCCACAGA
17	14189909	14191554	GGCCTTTTCAGGACACAAAG	502	deletion	60	yes	14189922	BreakSeq, ARC-SV, Pindel, LUMPY, LongRanger, BreakDancer
			AAAATGGAGAAACCCCGTCT
18	21990741	21992046	CTTTGAAAGCCAAGCAGAGG	491	deletion	60	yes	21990754	ARC-SV, LUMPY, BreakSeq, LongRanger, BreakDancer
			ATTGACAGTGGTGGTGCTCA
19	36840750	36847071	AGGCTGAGGCAGGAGTATCA	507	deletion		no	36840751	ARC-SV, BreakSeq, Pindel, LUMPY, LongRanger
			CTCTGCCTCCCAGGTTTATG
20	31310869	31312777	CAGCTACCCAGAAGGCTGAG	500	deletion	60	yes	31310878	ARC-SV, LUMPY, LongRanger
			TGACCAACATGGTGCCTAAA
21	44970362	44973299	ACTCCCTCCTTGCCCATACT	484	deletion	55	yes	44970377	ARC-SV, BreakSeq, Pindel, LUMPY, LongRanger, BreakDancer
			CTGTGGTTGTTTGCATCACC
22	37143146	37147872	CTGAGCCTTGGTGCTCTGTA	501	deletion		no	37143181	ARC-SV, BreakSeq, LongRanger, BreakDancer
			GCAGTGGCTCACGACTGTAA
22	20950621	20953838	CTTCGTCTGCACTTCCACAA	494	deletion	55	yes	20950637	ARC-SV, BreakSeq, Pindel, LUMPY, BreakDancer
			AGCCACCACACTGGAGAGAG
1	56996031	56996345	GCAAGGTCTTTTGCATCCAT	298	tandem duplication	55	yes	56996031	ARC-SV
			TGGGATAAGGGAGAGGAAGG
2	218322102	218322220	TCTGTGTGTGTGTGTGTGTGTG	194	tandem duplication		no	218322102	ARC-SV
			GAGATTTAGGTGGGACACAGC
3	178714712	178714828	AACCTGGAACCAGATGCTTG	185	tandem duplication	60	no	178714712	ARC-SV
			CCTGATCTCAGGAATTCAGAAGTAA
4	4359536	4359669	CGCATGTGTCAGAATGTCCT	238	tandem duplication	60	yes	4359536	ARC-SV
			AACCCAGGTGTCCATCCAT
5	117309152	117309329	TATGGCCTTGGGAAGCTTTA	292	tandem duplication	60	no	117309152	ARC-SV
			TAGGGCAGTGCCTAGTGGAG
6	1051776	1051963	TAAAGCTGCCAGTCCCACTC	278	tandem duplication	55	yes	1051776	ARC-SV
			GGCTCTTCCCTGATGAATGA
7	24068313	24068519	TCAAAGATTTTGGCCTGAGC	297	tandem duplication	60	yes	24068313	ARC-SV
			AGTCACCACCAAATCCTGCT
8	13958884	13959071	TGGGAATTTCCAGAATTGGT	316	tandem duplication	60	yes	13958884	ARC-SV
			TTTTCTCCTGCTGTCTGCTTT
9	34681479	34681971	CCAGGAGTTGGAGATTGCAT	296	tandem duplication	55	no	34681479	ARC-SV
			ACCCGGCCTCATTTAACTTT
10	6936512	6936608	TGCATGGTATGGAGTAGCAGT	137	tandem duplication		no	6936512	ARC-SV
			ACCATGCAGTATGCTGGAAAC
11	73710013	73710201	GGTGTAAGCTCGGCTCACTG	302	tandem duplication	55	yes	73710013	ARC-SV
			CTTTTTAGCCAGGCATGGTG
12	50292021	50292123	CCCAGATCTCTCTCCCTGGT	184	tandem duplication	60	yes	50292021	ARC-SV
			GAGGGAGAGGTAGGGGATGA
13	51922821	51922983	TAGGCTGGACCAGTTTTTGG	235	tandem duplication	60	yes	51922821	ARC-SV
			TGGGATAAGATTTGGGCAAC
14	82742612	82742808	TGGTCTCCCTGAAAATTTGG	286	tandem duplication	60	yes	82742612	ARC-SV
			ACCTGACCAATCAGCACTCC
15	86248877	86249021	CATTCTGTCAGACGGCTTCA	221	tandem duplication	60	yes	86248877	ARC-SV
			GAAACAAAGGGGAATCTGAACTT
16	13774130	13774464	CCTCCTTTCACCAAAGCTCA	294	tandem duplication	55	yes	13774130	ARC-SV
			CAGCATGTCCAAGCTGAAAA
17	67957683	67958082	CTGCTTCTGGCTCTGAGCTT	298	tandem duplication	55	yes	67957683	ARC-SV, Pindel
			CTTGCTGCTTGCTCCCTAAG
18	76040910	76041041	TGTTCCAAGAGTGTGGTTGG	209	tandem duplication	60	yes	76040910	ARC-SV
			AAGCACATGCTCAGCCATAA
19	17833067	17833233	AAAATGAGCTGGACCTGGTG	286	tandem duplication	60	no	17833067	ARC-SV
			TGCAGTGGCACAATCTTAGC
20	10304567	10304711	GGCTGCAGTGTGGGGTAG	275	tandem duplication	60	no	10304567	ARC-SV
			CTCCCTCCGGGGTCATAC

## Sheet: complex SV
hg19 reference; 1-based genomic coordinate counting
Complex SV (from ARC-SV)
Chromosme Coordinates		Blocks	Forward Primer/Reverse Primers	Product Size	SV	Annealing Temperature ℃	Validation
chr3 2294834-2316578		A/F	TTTGTGTTGGGAATACTGCAA	400	complex	55	yes
			GGAACAGGTACCAACTGACCA
chr3 2294834-2316578		F/C	AGGCCATGGCTTAGTTCCTT	392	complex	55	yes
			TCATTTGCTCAACTGGAGGTC
chr4 59426431-59438600		A/D	CCAAGTGTTTGCTGAAAATGA	400	complex	55	yes
			GGCCATTCTGCAAGGTAAAA
chr4 59426431-59438600		B/D	TCACAGGTTCATTTGCAAGG	415	complex	55	yes
			TTTGTGTCCTGGAACTCATGTT
chr11 63696592-63703165		A/D	GGCCTTTAACTGACCAACCA	401	complex		no
			TCCCAAAGTGCTGGGATTAC
chr11 63696592-63703165		B/D	GGTGGCTCATGCCTGTAATC	399	complex		no
			ATTAGCCAGGAGTGGTGACG
chr20 134443-138576		B/E	AGGGTGGTACATCCATACAATG	403	complex	55	yes
			TCTTCCTGTGAATGCAAACTT
chr20 134443-138576		E/D	AAAGTTTGCATTCACAGGAAGA	466	complex	55	yes
			TATCCAAGGCACCCAAGAAT
chr22 49620306-49633445		A/D	GGCGCAGACATAAGGAGAAA	402	complex	55	yes
			CATTAATTATGTACAGCTTTTGGTACA
chr22 49620306-49633445		B/D	TTTTGATGTACCAAAAGCTGTACATA	417	complex	55	yes
			GCCATCCTCATGGAAATGAT

## Sheet: Mate Pair WGS
hg19 reference; 1-based genomic coordinate counting
Mate Pair WGS
Chromosme #	Starting Coordinate	End Coordinate	Forward/ Reverse Primer	Product Size	SV	Annealing Temperature/ Time ℃	Validation	Coordinate in Dataset 10	Called By
1	63705366	63708146	CCAAGTAGCGTCCCAATCTG	501	deletion	60, 10 seconds	yes	63705371	ARC-SV,PINDEL,BreakSeq,LUMPY,LongRanger,BreakDancer
			TTCACGGGTTAACAGCAAAA
2	33224462	33227292	CCATCAGCATCACCTGAGAA	514	deletion		no	33224473	ARC-SV,PINDEL,LUMPY,BreakSeq,LongRanger,BreakDancer
			CCTGACCCCTTTTCACAGTC
3	4066937	4069555	ATGAGGCAAGTTCCCCAGTA	493	deletion		no	4066944	BreakSeq,PINDEL,LUMPY,LongRanger,BreakDancer
			ACACTCTGGGGACTGTGGTG
4	10392430	10402181	TACGGCTAAATGGTCCTCCA	496	deletion	60, 10 seconds	yes	10392445	ARC-SV,LUMPY,PINDEL,LongRanger,BreakDancer
			TCCAATGTAAAAATGGGCAAA
5	121576131	121580808	TTGCTGCCTGTGCTTTTATG	505	deletion	60, 10 seconds	yes	121576141	BreakSeq,LUMPY,LongRanger,BreakDancer
			CCATGTTTAGCGCTTCCTTC
6	55825957	55846712	TCCACATGCTAGAGGGGTTT	494	deletion	60, 10 seconds	yes	55825976	ARC-SV,LUMPY,BreakDancer
			TTGTTTTTCAGCAGTCTCATATTTT
7	8826500	8866251	TTTGGTTTGAAACTGGCAGA	500	deletion	60, 10 seconds	yes	8826518	ARC-SV,LUMPY,LongRanger,BreakDancer
			GGTTGCGAATAGAAGGGAAA
8	129465168	129471266	CCCCAGGAAAACATATCACCT	482	deletion	60, 10 seconds	no	129465175	BreakSeq,PINDEL,LUMPY,LongRanger,BreakDancer
			CCAAACACCGCATATTCTCA
9	110537537	110540595	TCACTCCATTGCTCAGGTTG	501	deletion	60, 10 seconds	yes	110537547	BreakSeq,LUMPY,LongRanger,BreakDancer
			CCACTCCTTGCTCCTCAACT
10	82879416	82891376	GTGTCTGTGCCTGTGTGCAT	498	deletion	60, 10 seconds	yes	82879428	ARC-SV,PINDEL,LUMPY,LongRanger,BreakDancer
			CTGCCCAGCAGTAGGAATGT
11	48367528	48373693	ATGCACAAATCCCAGAATCC	506	deletion	60, 10 seconds	yes	48367552	LUMPY,BreakDancer
			GGCCATACACACACAACCTG
12	60521845	60525035	TTCAATGTCAACAGCCCATT	490	deletion	60, 10 seconds	yes	60521853	ARC-SV,PINDEL,BreakSeq,LUMPY,LongRanger,BreakDancer
			TCAGGAAGGCTCTAGGGACA
1	121484052	121485433	TGGAAACGGGATTTCTTCCT	505	tandem duplicatin	60, 10 seconds	no	121484055	LUMPY,PINDEL,PINDEL,PINDEL
			CCACTTGCAAATTCCAGAAAA
2	2305530	2312774	GGACCTCTCTGCTTTTGGTG	484	tandem duplicatin	60, 10 seconds	no	2305530	PINDEL,LUMPY
			GAATGCAGAGAAAGGGGAAA
3	151510753	151514696	CCTGGGGTAGGCAACTTGTA	509	tandem duplicatin		no	151510753	LUMPY
			TGATTTCACAGGCTCACAGC
4	35754560	35766788	AGACCAAGCTGGCTTCAAAA	505	tandem duplicatin	60, 10 seconds	yes	35754559	ARC-SV,PINDEL,LUMPY
			GGATGCAAGACTCCTTGAGC
5	113029969	113037287	GGCTCACGCCTGTAATCCTA	497	tandem duplicatin	60, 10 seconds	yes	113029969	LUMPY,PINDEL
			GGATGCAAGACTCCTTGAGC
