# Supplementary material for: Comprehensive, integrated, and phased whole-genome analysis of the primary ENCODE cell line K562
Source: HighWire-hosted journal article supplement (doi:10.1101/gr.234948.118), 2019-02-08
Supplement: Supplemental_Table_S9.xlsx [file Supplemental_Table_S9.xlsx]

## Sheet: Table_S9
hg19 reference; 1-based genomic coordinate counting
Table S9. Identified REIs in K562 (Alu and LINE1)
Chromosome	Left_boundary	Right_boundary	Type	Total_support	Split_Read_support	Paired_End_support
chr1	55704922	55706247	Alu	13	0	13
chr1	243138451	243140259	Alu	10	0	10
chr1	245628088	245629290	Alu	9	0	9
chr1	40353430	40355450	Alu	50	6	44
chr1	47332415	47333703	Alu	7	0	7
chr1	70090057	70092078	Alu	26	7	19
chr1	76855800	76857657	Alu	7	1	6
chr1	79330223	79332171	Alu	10	2	8
chr1	103053485	103055516	Alu	31	10	21
chr1	165658303	165660280	Alu	27	11	16
chr1	193674126	193676158	Alu	46	11	35
chr1	222869684	222871697	Alu	28	14	14
chr1	235503132	235504213	Alu	7	0	7
chr1	245988305	245990319	Alu	66	6	60
chr1	246250987	246252747	Alu	6	0	6
chr1	247102391	247104288	Alu	11	0	11
chr1	1583530	1585564	Alu	33	0	33
chr1	1646731	1647760	Alu	7	0	7
chr1	4154871	4156195	Alu	6	0	6
chr1	6247857	6249881	Alu	24	0	24
chr1	8445628	8447655	Alu	32	3	29
chr1	10027667	10029631	Alu	15	0	15
chr1	12051029	12052171	Alu	6	0	6
chr1	13796392	13797674	Alu	25	0	25
chr1	16749701	16751735	Alu	54	9	45
chr1	17233207	17235046	Alu	14	0	14
chr1	19954943	19954945	Alu	13	13	0
chr1	20931701	20932997	Alu	24	0	24
chr1	20943738	20945760	Alu	32	4	28
chr1	20949246	20950367	Alu	17	9	8
chr1	21491587	21493620	Alu	29	3	26
chr1	23980128	23982159	Alu	43	6	37
chr1	24940266	24942291	Alu	62	8	54
chr1	29425839	29427855	Alu	36	3	33
chr1	33107422	33108504	Alu	6	3	3
chr1	37214796	37216776	Alu	27	7	20
chr1	38241382	38241384	Alu	9	9	0
chr1	38432653	38433793	Alu	10	1	9
chr1	38794046	38795798	Alu	14	0	14
chr1	45450295	45451512	Alu	6	0	6
chr1	45794695	45796730	Alu	31	4	27
chr1	46678031	46680059	Alu	41	4	37
chr1	47239360	47240626	Alu	10	1	9
chr1	57904354	57906142	Alu	10	0	10
chr1	58070858	58072857	Alu	41	14	27
chr1	59204320	59205441	Alu	9	6	3
chr1	59590498	59592504	Alu	11	0	11
chr1	59870876	59872895	Alu	27	14	13
chr1	61055210	61057059	Alu	13	5	8
chr1	63460951	63462987	Alu	34	12	22
chr1	63509783	63511561	Alu	39	0	39
chr1	64957062	64959098	Alu	34	9	25
chr1	66389534	66390798	Alu	8	0	8
chr1	70411345	70413356	Alu	10	3	7
chr1	72638006	72639982	Alu	19	7	12
chr1	74470642	74472489	Alu	10	3	7
chr1	75147050	75149069	Alu	22	4	18
chr1	75556159	75558091	Alu	18	2	16
chr1	77163996	77165553	Alu	6	0	6
chr1	80852261	80854308	Alu	35	0	35
chr1	80862379	80863559	L1	6	0	6
chr1	81350573	81352436	Alu	13	8	5
chr1	81523116	81525151	Alu	35	7	28
chr1	81765406	81767203	Alu	9	0	9
chr1	82311059	82313073	Alu	28	6	22
chr1	84833865	84833906	L1	14	14	0
chr1	84912264	84914294	Alu	20	7	13
chr1	85619125	85621074	Alu	23	0	23
chr1	86005576	86005609	L1	10	10	0
chr1	86462057	86462079	Alu	9	9	0
chr1	88678077	88679150	L1	7	0	7
chr1	93166520	93168546	Alu	56	10	46
chr1	93497212	93499233	Alu	35	20	15
chr1	93838214	93839943	Alu	12	0	12
chr1	100993211	100995239	Alu	55	22	33
chr1	102208915	102210952	Alu	28	9	19
chr1	102919531	102921557	Alu	30	8	22
chr1	104573506	104575457	Alu	16	3	13
chr1	105230185	105232121	Alu	21	10	11
chr1	106329940	106331921	Alu	16	7	9
chr1	108141470	108143496	Alu	19	7	12
chr1	108566572	108568581	Alu	27	4	23
chr1	112122676	112124709	Alu	40	9	31
chr1	112990995	112993032	Alu	52	20	32
chr1	115200393	115202420	Alu	75	12	63
chr1	117763405	117765230	L1	7	0	7
chr1	155922606	155925409	Alu	30	0	30
chr1	157235661	157236758	Alu	7	5	2
chr1	161031102	161031106	Alu	6	6	0
chr1	163313463	163315459	Alu	12	1	11
chr1	164927135	164928922	Alu	6	0	6
chr1	165829900	165831067	Alu	7	0	7
chr1	166188442	166190439	Alu	8	1	7
chr1	167866236	167867789	Alu	31	0	31
chr1	169962638	169962673	Alu	21	21	0
chr1	170602435	170604456	Alu	26	4	22
chr1	171357314	171359334	Alu	12	5	7
chr1	174332000	174334427	Alu	26	2	24
chr1	178494887	178496276	Alu	25	17	8
chr1	179574368	179576245	L1	39	30	9
chr1	180856550	180858585	Alu	81	21	60
chr1	181046414	181048399	Alu	10	1	9
chr1	181587439	181589318	Alu	8	3	5
chr1	181600326	181602275	Alu	8	3	5
chr1	185503806	185505720	Alu	12	3	9
chr1	188437208	188439236	Alu	45	9	36
chr1	188513066	188514262	Alu	6	0	6
chr1	189246027	189248027	Alu	18	5	13
chr1	189295015	189296159	L1	8	1	7
chr1	189296325	189297427	L1	6	0	6
chr1	191579786	191581793	Alu	11	2	9
chr1	196152532	196154570	Alu	30	0	30
chr1	197010859	197012646	Alu	12	3	9
chr1	204237459	204239470	Alu	18	4	14
chr1	204344105	204346057	Alu	11	4	7
chr1	205561585	205563499	Alu	51	1	50
chr1	208690483	208692486	Alu	19	1	18
chr1	210918375	210918411	Alu	6	6	0
chr1	211232773	211233948	Alu	8	0	8
chr1	214770439	214770441	Alu	9	9	0
chr1	217023854	217025885	Alu	43	11	32
chr1	218000826	218002866	Alu	32	2	30
chr1	219557920	219559792	Alu	18	12	6
chr1	221968172	221970163	Alu	20	5	15
chr1	223910563	223912591	Alu	19	2	17
chr1	225994595	225997450	Alu	105	23	82
chr1	226415472	226415475	Alu	24	24	0
chr1	226810571	226810573	Alu	14	14	0
chr1	233649438	233650632	Alu	9	2	7
chr1	234069554	234071563	Alu	44	18	26
chr1	234804713	234806735	Alu	40	14	26
chr1	235536893	235538682	Alu	13	1	12
chr1	235572127	235573483	Alu	6	0	6
chr1	236660486	236661709	Alu	6	0	6
chr1	237495011	237495013	Alu	6	6	0
chr1	237568195	237570213	Alu	49	16	33
chr1	239425255	239427289	Alu	16	3	13
chr1	241907610	241909628	Alu	34	21	13
chr1	243376936	243377936	Alu	7	6	1
chr1	244511006	244512916	Alu	20	0	20
chr1	244606817	244607976	Alu	6	0	6
chr1	244955497	244956992	Alu	32	2	30
chr1	245762583	245764451	Alu	12	0	12
chr1	246300896	246302813	Alu	57	0	57
chr1	246564738	246566705	Alu	30	16	14
chr1	246738507	246740477	Alu	36	0	36
chr10	85982244	85984253	Alu	13	7	6
chr10	73660986	73663023	Alu	19	4	15
chr10	26851974	26853930	Alu	14	3	11
chr10	35994072	35996076	Alu	19	11	8
chr10	56180265	56182190	Alu	9	2	7
chr10	56901370	56903358	Alu	11	6	5
chr10	106003329	106005334	Alu	14	4	10
chr10	766654	767883	Alu	10	0	10
chr10	1291091	1292368	Alu	14	7	7
chr10	2076543	2078579	Alu	31	11	20
chr10	2240027	2241944	Alu	6	1	5
chr10	5003607	5004767	Alu	10	6	4
chr10	9473981	9475861	Alu	9	4	5
chr10	9510974	9511974	Alu	6	5	1
chr10	12372321	12374250	Alu	9	6	3
chr10	14276374	14278159	Alu	9	0	9
chr10	14395706	14397667	Alu	15	7	8
chr10	14483802	14484960	Alu	9	3	6
chr10	14536776	14538783	Alu	19	10	9
chr10	19786101	19787101	Alu	7	6	1
chr10	21191864	21193099	Alu	13	7	6
chr10	23635373	23635392	Alu	14	14	0
chr10	23774788	23776706	Alu	13	7	6
chr10	25956460	25958210	Alu	8	6	2
chr10	27928935	27930939	Alu	8	5	3
chr10	28794455	28795487	Alu	6	4	2
chr10	29101556	29103307	Alu	13	7	6
chr10	29104300	29106286	Alu	14	7	7
chr10	32653159	32653161	Alu	7	7	0
chr10	48419160	48420160	Alu	13	12	1
chr10	54465942	54467940	Alu	24	16	8
chr10	54805955	54805957	Alu	8	8	0
chr10	55290474	55292396	Alu	11	4	7
chr10	55982324	55983324	Alu	8	5	3
chr10	57973739	57975643	Alu	47	11	36
chr10	58482915	58484615	Alu	19	12	7
chr10	60984112	60985939	Alu	28	10	18
chr10	65594130	65596104	Alu	18	13	5
chr10	66836078	66838070	Alu	17	8	9
chr10	67430044	67431962	Alu	7	5	2
chr10	68083746	68085647	Alu	9	6	3
chr10	68336758	68336760	Alu	6	6	0
chr10	68948313	68949389	L1	11	5	6
chr10	69993896	69995829	Alu	7	2	5
chr10	70046510	70046520	Alu	9	9	0
chr10	70684901	70686113	Alu	6	0	6
chr10	71307751	71309712	Alu	10	3	7
chr10	71609161	71610297	Alu	16	10	6
chr10	83332091	83334063	Alu	10	5	5
chr10	87775049	87776891	Alu	7	4	3
chr10	88264006	88265211	Alu	9	0	9
chr10	91109115	91111084	Alu	29	6	23
chr10	97718511	97720444	Alu	10	4	6
chr10	105816255	105817404	Alu	12	7	5
chr10	110453351	110453391	L1	6	6	0
chr10	114072919	114074869	Alu	15	9	6
chr10	120768154	120769223	Alu	10	7	3
chr10	122140446	122141606	Alu	16	11	5
chr10	124735107	124736212	Alu	9	7	2
chr10	127197234	127197236	Alu	7	7	0
chr10	129189295	129191220	Alu	12	8	4
chr10	135034701	135036576	Alu	9	0	9
chr11	47578859	47580110	Alu	10	5	5
chr11	736043	737867	Alu	15	0	15
chr11	19381930	19383786	Alu	13	7	6
chr11	61144233	61146053	Alu	15	8	7
chr11	427084	429012	Alu	25	15	10
chr11	3267642	3268788	Alu	20	16	4
chr11	5884137	5886149	Alu	31	8	23
chr11	5887727	5888805	L1	8	0	8
chr11	6407587	6409330	Alu	9	6	3
chr11	7612572	7612621	Alu	9	9	0
chr11	9331019	9332019	Alu	6	5	1
chr11	13091196	13093199	Alu	17	12	5
chr11	13812863	13814037	Alu	12	8	4
chr11	23357736	23359440	Alu	7	2	5
chr11	25604257	25606145	Alu	12	9	3
chr11	27025155	27026237	Alu	9	6	3
chr11	31951089	31952208	Alu	12	5	7
chr11	34115401	34115403	Alu	6	6	0
chr11	34396387	34398313	Alu	14	4	10
chr11	37705337	37707232	Alu	8	4	4
chr11	38800080	38802067	Alu	9	7	2
chr11	39974584	39976557	Alu	9	2	7
chr11	40493011	40494996	Alu	13	1	12
chr11	40726180	40728112	Alu	6	2	4
chr11	42054897	42055975	Alu	15	10	5
chr11	43190460	43192084	Alu	8	5	3
chr11	46631138	46631140	Alu	8	8	0
chr11	47506717	47508528	Alu	8	0	8
chr11	48755713	48756713	L1	13	12	1
chr11	48933047	48934115	Alu	10	7	3
chr11	55445743	55445785	L1	7	7	0
chr11	56302480	56304310	Alu	8	6	2
chr11	57773196	57774268	Alu	9	6	3
chr11	67421538	67423458	Alu	7	0	7
chr11	68068298	68070288	Alu	12	0	12
chr11	85773384	85775398	Alu	11	5	6
chr11	88907941	88909916	Alu	8	4	4
chr11	92607525	92609491	Alu	13	9	4
chr11	94867834	94869716	Alu	21	0	21
chr11	98146193	98147255	L1	10	0	10
chr11	99729410	99729412	Alu	6	6	0
chr11	100911573	100912811	Alu	17	11	6
chr11	101736034	101737034	Alu	6	5	1
chr11	101796321	101796358	Alu	14	14	0
chr11	102524642	102526427	Alu	13	6	7
chr11	104785612	104787388	Alu	12	7	5
chr11	106043565	106044620	Alu	8	4	4
chr11	106169558	106170611	Alu	6	4	2
chr11	116845782	116846782	Alu	12	11	1
chr11	126940134	126942150	Alu	13	8	5
chr11	130674959	130676069	Alu	13	4	9
chr11	134305468	134306632	L1	12	10	2
chr12	58457277	58458308	Alu	9	6	3
chr12	97419073	97420953	Alu	8	5	3
chr12	123927281	123929039	Alu	21	8	13
chr12	784366	786147	Alu	9	4	5
chr12	1652434	1653507	Alu	7	0	7
chr12	2089786	2090852	Alu	13	11	2
chr12	6407528	6407597	Alu	12	12	0
chr12	7107114	7108342	Alu	16	0	16
chr12	7603865	7604865	Alu	9	8	1
chr12	9368290	9369322	Alu	7	4	3
chr12	14172883	14173997	Alu	11	7	4
chr12	14475931	14477242	Alu	15	0	15
chr12	18367832	18369637	Alu	8	4	4
chr12	22122783	22124779	Alu	10	5	5
chr12	28416299	28418198	Alu	19	9	10
chr12	30419678	30420780	Alu	6	3	3
chr12	31120647	31121647	Alu	8	7	1
chr12	32076257	32077449	Alu	20	7	13
chr12	32250843	32252819	Alu	9	0	9
chr12	39377326	39378346	Alu	10	8	2
chr12	40672010	40673997	Alu	6	3	3
chr12	40831789	40832996	Alu	13	4	9
chr12	41846708	41848708	Alu	25	14	11
chr12	42482577	42482610	Alu	26	26	0
chr12	44138556	44140493	Alu	8	4	4
chr12	44487501	44488555	Alu	16	14	2
chr12	45418545	45419545	Alu	7	6	1
chr12	46174178	46175286	Alu	28	23	5
chr12	47729723	47731705	Alu	7	2	5
chr12	48311490	48313507	Alu	31	7	24
chr12	50005317	50006498	Alu	7	0	7
chr12	50182486	50182509	Alu	8	8	0
chr12	53747395	53749306	Alu	13	7	6
chr12	58358947	58358984	Alu	6	6	0
chr12	59380478	59381478	Alu	6	5	1
chr12	59410140	59410142	Alu	6	6	0
chr12	60676889	60678825	Alu	15	12	3
chr12	61703213	61705142	Alu	9	7	2
chr12	65396352	65398219	Alu	9	2	7
chr12	67010604	67011604	Alu	8	7	1
chr12	69862840	69863932	Alu	7	0	7
chr12	71524539	71525565	Alu	8	6	2
chr12	74124064	74125064	Alu	9	8	1
chr12	75930086	75932122	Alu	24	3	21
chr12	76509935	76511937	Alu	10	6	4
chr12	76822940	76822972	Alu	6	6	0
chr12	78999293	79000474	Alu	7	2	5
chr12	84964133	84965133	L1	7	6	1
chr12	87869815	87871779	Alu	6	2	4
chr12	88337279	88338992	Alu	9	5	4
chr12	95589350	95589389	Alu	10	10	0
chr12	96512785	96514721	Alu	17	13	4
chr12	98883572	98887278	Alu	15	5	10
chr12	105437370	105439184	Alu	12	8	4
chr12	105829890	105831658	Alu	11	8	3
chr12	125334308	125334316	Alu	6	6	0
chr12	128500230	128501945	Alu	11	0	11
chr12	130454059	130455975	Alu	10	5	5
chr12	130789902	130791682	Alu	6	0	6
chr12	133140395	133142148	Alu	12	0	12
chr12	133182510	133184501	Alu	19	8	11
chr13	80198081	80199981	Alu	13	8	5
chr13	87392048	87393787	Alu	10	8	2
chr13	90946658	90948636	Alu	54	43	11
chr13	22187480	22189508	Alu	17	7	10
chr13	23642734	23642736	Alu	7	7	0
chr13	26815387	26816514	Alu	9	6	3
chr13	31891089	31892842	Alu	13	9	4
chr13	37949064	37950991	Alu	6	0	6
chr13	42939151	42940273	Alu	12	8	4
chr13	43261750	43262792	Alu	6	1	5
chr13	46267066	46268107	Alu	7	4	3
chr13	50122200	50123981	Alu	34	8	26
chr13	56186281	56187559	Alu	6	3	3
chr13	61366406	61367483	Alu	10	8	2
chr13	71141531	71143328	Alu	7	4	3
chr13	79258788	79259789	L1	9	8	1
chr13	79270692	79272548	Alu	11	7	4
chr13	87696132	87696174	Alu	8	8	0
chr13	92160658	92162669	Alu	56	43	13
chr13	92260302	92262221	Alu	44	32	12
chr13	93828236	93829265	Alu	7	5	2
chr13	95249260	95250402	Alu	13	11	2
chr13	104559462	104560657	Alu	9	5	4
chr14	74186436	74187510	Alu	11	9	2
chr14	32668216	32669403	Alu	22	11	11
chr14	34952350	34953350	Alu	13	12	1
chr14	38358691	38359736	Alu	10	6	4
chr14	39874084	39875157	L1	13	7	6
chr14	51431080	51432195	Alu	14	9	5
chr14	51718066	51719918	Alu	10	7	3
chr14	55028091	55029803	Alu	9	5	4
chr14	63220688	63222604	Alu	11	8	3
chr14	63226283	63226285	Alu	7	7	0
chr14	65014039	65015192	Alu	9	6	3
chr14	77116080	77117152	Alu	12	9	3
chr14	78982589	78982628	Alu	6	6	0
chr14	86629689	86631667	Alu	12	1	11
chr14	91184180	91185946	Alu	6	3	3
chr14	92124193	92126055	Alu	7	5	2
chr14	103027514	103028514	Alu	6	5	1
chr14	103279553	103279555	Alu	12	12	0
chr15	93896585	93897990	Alu	9	0	9
chr15	97320357	97321382	Alu	13	10	3
chr15	22768146	22769189	Alu	6	4	2
chr15	25734654	25736607	Alu	9	2	7
chr15	27765632	27766648	Alu	6	4	2
chr15	28174834	28176801	L1	7	3	4
chr15	31459337	31461080	Alu	8	0	8
chr15	37707042	37708042	L1	14	13	1
chr15	39776562	39776564	Alu	6	6	0
chr15	41100225	41101225	Alu	7	6	1
chr15	45568921	45570923	Alu	16	11	5
chr15	47507328	47507330	L1	10	10	0
chr15	54285459	54287338	Alu	14	10	4
chr15	54799434	54801407	Alu	9	2	7
chr15	55701363	55703241	Alu	8	6	2
chr15	66667162	66669132	Alu	7	4	3
chr15	67294736	67295865	Alu	14	8	6
chr15	72639448	72640495	Alu	8	6	2
chr15	73983148	73984325	Alu	9	7	2
chr15	75175630	75177623	Alu	16	8	8
chr15	76372530	76372582	Alu	16	16	0
chr15	77091486	77093504	Alu	30	11	19
chr15	79794961	79795961	Alu	7	6	1
chr15	81391610	81393603	Alu	9	6	3
chr15	93834785	93836792	Alu	18	13	5
chr15	97769326	97771220	Alu	7	2	5
chr15	98870572	98872366	Alu	9	0	9
chr16	14499225	14500249	Alu	11	8	3
chr16	3089035	3090313	Alu	14	4	10
chr16	3539180	3539182	Alu	15	15	0
chr16	7540481	7542395	Alu	7	4	3
chr16	18959209	18960953	Alu	6	4	2
chr16	21238056	21240022	Alu	10	8	2
chr16	23865058	23866058	Alu	9	8	1
chr16	24327524	24328524	Alu	9	8	1
chr16	50392140	50392147	Alu	6	6	0
chr16	56568905	56570017	Alu	9	7	2
chr16	57779133	57779153	Alu	8	8	0
chr16	58800966	58800968	Alu	10	10	0
chr16	60040217	60042109	Alu	12	9	3
chr16	61091228	61092255	Alu	6	4	2
chr16	65481307	65483109	Alu	9	7	2
chr16	75608581	75608636	Alu	11	11	0
chr16	80217224	80218450	Alu	13	10	3
chr16	80468551	80468563	Alu	6	6	0
chr16	80695982	80697980	Alu	11	9	2
chr16	81129234	81129236	Alu	18	18	0
chr16	81224605	81225812	Alu	6	0	6
chr16	82163679	82165704	Alu	22	12	10
chr16	85107738	85108762	Alu	6	4	2
chr16	87191549	87192549	Alu	6	5	1
chr16	89291197	89292197	Alu	8	7	1
chr17	70695161	70697181	Alu	9	6	3
chr17	1032505	1032515	Alu	6	6	0
chr17	13045147	13045149	Alu	6	6	0
chr17	13883444	13884444	Alu	10	9	1
chr17	17733395	17734439	Alu	13	10	3
chr17	18274539	18276498	Alu	9	6	3
chr17	21056089	21057218	Alu	7	5	2
chr17	21668112	21668146	Alu	10	10	0
chr17	25278265	25278267	Alu	6	6	0
chr17	32734309	32734334	Alu	7	7	0
chr17	35209362	35211341	Alu	7	2	5
chr17	35427848	35428980	Alu	17	9	8
chr17	41168990	41169012	Alu	6	6	0
chr17	48997449	48998546	Alu	17	15	2
chr17	51030216	51031268	Alu	8	6	2
chr17	51427752	51427799	Alu	12	12	0
chr17	54947460	54947499	Alu	6	6	0
chr17	55779424	55781424	Alu	8	5	3
chr17	56046418	56047643	Alu	17	10	7
chr17	57627983	57629948	Alu	22	0	22
chr17	60376765	60376767	Alu	12	12	0
chr17	65303504	65303506	Alu	8	8	0
chr17	67874375	67876303	Alu	7	4	3
chr17	68327424	68327426	Alu	6	6	0
chr17	73182387	73182417	Alu	7	7	0
chr17	73426374	73427588	Alu	17	0	17
chr17	74580120	74580122	Alu	6	6	0
chr17	76346359	76348137	Alu	11	9	2
chr17	79325570	79327349	Alu	22	0	22
chr18	1817395	1819212	Alu	18	0	18
chr18	440240	442101	Alu	16	0	16
chr18	852498	853534	Alu	9	7	2
chr18	1234786	1235786	Alu	14	13	1
chr18	1754459	1756123	Alu	15	0	15
chr18	1830653	1830657	Alu	7	7	0
chr18	2115523	2117370	Alu	10	0	10
chr18	3574029	3575803	Alu	8	0	8
chr18	4355002	4356002	Alu	7	6	1
chr18	7554143	7554154	L1	7	7	0
chr18	11978839	11978841	Alu	6	6	0
chr18	23793203	23794203	Alu	8	7	1
chr18	24475982	24476982	Alu	9	8	1
chr18	25870927	25871964	Alu	18	16	2
chr18	27800691	27801691	Alu	10	9	1
chr18	28731996	28732996	L1	7	6	1
chr18	57371759	57372826	Alu	6	4	2
chr18	62173781	62173783	Alu	6	6	0
chr18	71082898	71084783	Alu	8	0	8
chr18	73952925	73954932	Alu	25	4	21
chr18	75845492	75846492	Alu	10	9	1
chr18	76297387	76299231	Alu	10	0	10
chr19	8486869	8488155	Alu	11	0	11
chr19	784401	785477	Alu	6	0	6
chr19	2896295	2896310	Alu	7	7	0
chr19	3081482	3081485	Alu	10	10	0
chr19	3742497	3743707	Alu	12	5	7
chr19	7803138	7804811	Alu	11	9	2
chr19	8687078	8687096	Alu	6	6	0
chr19	10825578	10825597	Alu	7	7	0
chr19	12698930	12698932	Alu	6	6	0
chr19	15044261	15045261	Alu	9	8	1
chr19	20745972	20745974	Alu	7	7	0
chr19	23142919	23142921	Alu	11	11	0
chr19	23390520	23391665	Alu	6	0	6
chr19	23916998	23917998	Alu	7	6	1
chr19	45513473	45513511	Alu	6	6	0
chr19	48264511	48264531	Alu	12	12	0
chr19	53789887	53791148	Alu	10	0	10
chr19	56965111	56966111	Alu	6	5	1
chr19	57022592	57023592	Alu	9	8	1
chr19	59035299	59035301	Alu	7	7	0
chr2	36830940	36832944	Alu	22	10	12
chr2	44824836	44826869	Alu	21	3	18
chr2	3717456	3719408	Alu	10	1	9
chr2	21380166	21382184	Alu	17	5	12
chr2	26622689	26624697	Alu	13	4	9
chr2	43023068	43025096	Alu	34	5	29
chr2	123829594	123831346	Alu	20	1	19
chr2	126369723	126371739	Alu	11	6	5
chr2	142113150	142115107	Alu	10	5	5
chr2	173521175	173523185	Alu	25	4	21
chr2	183974235	183976090	Alu	54	2	52
chr2	192839040	192841002	Alu	23	0	23
chr2	240859750	240861710	Alu	22	4	18
chr2	651689	653675	Alu	11	3	8
chr2	1470716	1472687	Alu	18	0	18
chr2	1816847	1818588	Alu	14	0	14
chr2	1844109	1845858	Alu	11	0	11
chr2	3629307	3631302	Alu	19	6	13
chr2	4255232	4257133	Alu	14	3	11
chr2	5561919	5563917	Alu	28	7	21
chr2	9887813	9889788	Alu	12	3	9
chr2	11425528	11427390	Alu	9	2	7
chr2	15162925	15164767	Alu	24	5	19
chr2	21795811	21797807	Alu	16	5	11
chr2	23190000	23191068	L1	13	8	5
chr2	26472935	26474961	Alu	31	6	25
chr2	27526300	27528296	Alu	20	2	18
chr2	29251630	29253469	Alu	8	0	8
chr2	31558681	31560705	Alu	39	7	32
chr2	34255337	34256387	Alu	11	4	7
chr2	35815982	35817493	Alu	7	0	7
chr2	37003232	37005235	Alu	14	0	14
chr2	39314327	39316352	Alu	32	10	22
chr2	47995040	47996309	Alu	10	0	10
chr2	49543178	49544351	L1	10	0	10
chr2	49732481	49734517	Alu	22	6	16
chr2	54324096	54326032	Alu	15	0	15
chr2	56372579	56374488	Alu	10	1	9
chr2	57246949	57248970	Alu	27	5	22
chr2	61858135	61860097	Alu	11	3	8
chr2	62500914	62502860	Alu	15	5	10
chr2	63778281	63779340	Alu	7	3	4
chr2	63965391	63966456	Alu	6	3	3
chr2	64357431	64359425	Alu	17	4	13
chr2	65099037	65101061	Alu	30	5	25
chr2	65332786	65334814	Alu	58	14	44
chr2	66658008	66660011	Alu	17	3	14
chr2	69719291	69720515	Alu	6	0	6
chr2	71705287	71707291	Alu	24	3	21
chr2	74124531	74126419	Alu	23	9	14
chr2	75386891	75388833	Alu	14	2	12
chr2	77880881	77882885	Alu	23	2	21
chr2	83830720	83832722	Alu	26	4	22
chr2	84727742	84729679	Alu	26	6	20
chr2	102912353	102913434	L1	13	5	8
chr2	106100667	106102570	Alu	9	2	7
chr2	106584611	106586636	Alu	8	1	7
chr2	112446423	112448458	Alu	51	16	35
chr2	112452935	112454960	Alu	17	3	14
chr2	114105435	114107449	Alu	9	3	6
chr2	116972229	116974266	Alu	19	1	18
chr2	123329646	123331666	Alu	22	5	17
chr2	124053916	124055910	Alu	31	5	26
chr2	126801763	126803444	Alu	10	3	7
chr2	128838948	128840067	Alu	11	0	11
chr2	129702436	129703589	L1	6	0	6
chr2	130173860	130174998	L1	6	0	6
chr2	133059298	133060754	Alu	6	4	2
chr2	133062495	133064154	Alu	6	0	6
chr2	138258793	138260800	Alu	22	7	15
chr2	141533056	141535056	Alu	7	2	5
chr2	141852907	141852909	L1	10	10	0
chr2	145345753	145347786	Alu	33	15	18
chr2	147020758	147021932	L1	13	10	3
chr2	148476007	148478011	Alu	7	3	4
chr2	148649074	148651081	Alu	18	4	14
chr2	150763250	150765275	Alu	26	8	18
chr2	153247267	153249299	Alu	23	3	20
chr2	154159671	154161707	Alu	21	3	18
chr2	154751582	154753614	Alu	24	4	20
chr2	158027218	158029148	Alu	18	4	14
chr2	158278979	158280992	Alu	24	9	15
chr2	158449923	158451952	Alu	28	6	22
chr2	158509357	158511394	Alu	54	8	46
chr2	159281622	159283653	Alu	39	8	31
chr2	160106623	160108573	Alu	18	7	11
chr2	160157999	160160029	Alu	27	7	20
chr2	160375322	160377220	Alu	42	22	20
chr2	162747964	162749867	L1	9	4	5
chr2	167070731	167072055	Alu	6	0	6
chr2	169143390	169145275	Alu	17	12	5
chr2	170340528	170342851	Alu	16	10	6
chr2	170643951	170643953	Alu	11	11	0
chr2	175734933	175736958	Alu	21	6	15
chr2	176727286	176729309	Alu	71	21	50
chr2	177315619	177317547	Alu	17	8	9
chr2	178317714	178319729	Alu	15	0	15
chr2	178350455	178352478	Alu	52	12	40
chr2	178647942	178649967	Alu	40	9	31
chr2	181371086	181372196	Alu	13	10	3
chr2	181879783	181881767	Alu	18	6	12
chr2	182261185	182263145	Alu	7	2	5
chr2	185124633	185126609	Alu	22	5	17
chr2	189672419	189674432	Alu	20	7	13
chr2	189958422	189960392	Alu	28	7	21
chr2	198762448	198764452	Alu	25	5	20
chr2	202630505	202632457	Alu	13	1	12
chr2	206146267	206147267	L1	8	6	2
chr2	208471446	208473389	Alu	19	5	14
chr2	212924313	212926343	Alu	11	5	6
chr2	218212645	218214655	Alu	31	11	20
chr2	223881906	223883865	Alu	13	6	7
chr2	229414786	229415969	Alu	7	0	7
chr2	233844877	233846886	Alu	25	5	20
chr2	237757647	237758900	Alu	10	2	8
chr20	4029136	4030958	Alu	8	0	8
chr20	52724963	52726227	Alu	9	2	7
chr20	53760841	53761841	Alu	6	5	1
chr21	16352934	16352936	Alu	6	6	0
chr21	23579458	23579477	Alu	7	7	0
chr21	26496543	26497543	Alu	11	10	1
chr21	29873255	29874477	Alu	9	0	9
chr21	32441935	32441937	Alu	9	9	0
chr21	33398409	33399409	Alu	7	6	1
chr21	37237928	37237934	Alu	8	8	0
chr21	39057731	39057751	Alu	7	7	0
chr22	31750993	31752885	Alu	12	7	5
chr22	17282013	17282042	L1	21	21	0
chr22	17705290	17705292	Alu	9	9	0
chr22	19361445	19361447	Alu	11	11	0
chr22	22038454	22038494	Alu	60	60	0
chr22	22333889	22334889	Alu	9	8	1
chr22	22715504	22715526	L1	17	17	0
chr22	22878214	22879305	Alu	12	7	5
chr22	28455901	28455906	L1	6	6	0
chr22	41709929	41711206	Alu	7	4	3
chr3	57539016	57540834	Alu	19	3	16
chr3	1473478	1475420	Alu	16	0	16
chr3	5275002	5276761	Alu	18	0	18
chr3	144686869	144688886	Alu	25	10	15
chr3	151747834	151749860	Alu	53	20	33
chr3	169950009	169952006	Alu	28	10	18
chr3	283130	285003	Alu	11	0	11
chr3	1921031	1922961	Alu	46	0	46
chr3	2881274	2883172	Alu	22	0	22
chr3	3392817	3394593	Alu	19	0	19
chr3	3670354	3672241	Alu	9	0	9
chr3	4204151	4206106	Alu	28	0	28
chr3	5038842	5040128	Alu	17	0	17
chr3	7537746	7539773	Alu	44	14	30
chr3	11312674	11313890	Alu	7	0	7
chr3	11640062	11642097	Alu	64	0	64
chr3	11686089	11687883	Alu	21	0	21
chr3	12604248	12605419	Alu	14	0	14
chr3	12817453	12819488	Alu	60	20	40
chr3	15779029	15779033	Alu	33	33	0
chr3	16795086	16797120	Alu	62	12	50
chr3	17512201	17513457	Alu	6	0	6
chr3	18994956	18996932	Alu	21	8	13
chr3	19034439	19036474	Alu	20	12	8
chr3	23360306	23362105	Alu	23	2	21
chr3	26523447	26525469	L1	24	6	18
chr3	28424538	28425816	Alu	14	11	3
chr3	28839170	28841193	Alu	46	11	35
chr3	34015414	34016743	Alu	6	0	6
chr3	36459131	36461165	Alu	18	3	15
chr3	36798871	36800895	Alu	31	15	16
chr3	38398704	38400713	Alu	22	2	20
chr3	39215041	39217084	Alu	33	0	33
chr3	40240643	40242643	Alu	31	6	25
chr3	44340076	44341316	Alu	40	15	25
chr3	44741389	44742389	Alu	6	5	1
chr3	45541653	45543683	Alu	65	13	52
chr3	47781860	47783888	Alu	60	15	45
chr3	47825570	47826876	Alu	12	0	12
chr3	48131028	48131039	Alu	9	9	0
chr3	50062026	50064050	Alu	26	3	23
chr3	50878160	50880196	Alu	48	9	39
chr3	53498999	53501022	Alu	15	3	12
chr3	59852637	59853858	L1	10	5	5
chr3	63539967	63541843	Alu	17	5	12
chr3	71587432	71589399	Alu	12	0	12
chr3	76965463	76966623	Alu	9	4	5
chr3	83303118	83304962	Alu	12	6	6
chr3	85575550	85577510	L1	14	7	7
chr3	87519469	87520718	Alu	13	5	8
chr3	88477228	88479173	Alu	18	11	7
chr3	99654385	99656421	Alu	15	6	9
chr3	100176251	100178280	Alu	20	3	17
chr3	100409542	100411576	Alu	29	7	22
chr3	103170390	103172384	Alu	14	4	10
chr3	103418043	103420430	Alu	11	5	6
chr3	109751623	109752722	L1	6	4	2
chr3	110986490	110988450	Alu	14	2	12
chr3	113202540	113204564	Alu	9	2	7
chr3	127014575	127016558	Alu	20	7	13
chr3	128394214	128396204	Alu	15	7	8
chr3	129937483	129939449	Alu	18	6	12
chr3	151537584	151539280	Alu	14	3	11
chr3	152611181	152612326	Alu	15	8	7
chr3	155381860	155383858	Alu	21	13	8
chr3	155817392	155819391	Alu	9	0	9
chr3	157566218	157566230	Alu	7	7	0
chr3	164586059	164587797	Alu	8	0	8
chr3	165696964	165698221	Alu	6	0	6
chr3	170036606	170038420	Alu	24	14	10
chr3	171625384	171627398	Alu	32	15	17
chr3	172321976	172323936	Alu	15	7	8
chr3	174409737	174411748	Alu	34	10	24
chr3	176091233	176091255	L1	9	9	0
chr3	176142019	176144056	Alu	28	8	20
chr3	176541258	176543087	Alu	20	0	20
chr3	181191827	181193864	L1	20	15	5
chr3	185112935	185114089	Alu	6	0	6
chr3	187819527	187821563	Alu	27	5	22
chr3	190681833	190683569	L1	14	0	14
chr3	190998451	191000433	Alu	26	9	17
chr3	192375518	192377536	Alu	34	8	26
chr3	192858212	192859944	Alu	10	0	10
chr3	193353159	193355164	L1	11	7	4
chr3	195193305	195195089	Alu	20	0	20
chr4	5667097	5668970	L1	7	5	2
chr4	47495519	47497517	Alu	24	11	13
chr4	175193524	175195500	Alu	9	4	5
chr4	180255955	180257974	Alu	11	3	8
chr4	1300836	1302856	Alu	16	3	13
chr4	2524443	2525549	Alu	9	0	9
chr4	15243926	15245737	Alu	19	0	19
chr4	17542701	17544414	Alu	10	0	10
chr4	19299177	19300303	Alu	6	0	6
chr4	23720971	23722649	Alu	6	0	6
chr4	26437618	26439572	Alu	12	2	10
chr4	29906823	29908772	Alu	11	2	9
chr4	30891068	30893031	Alu	18	5	13
chr4	31590458	31592463	Alu	11	0	11
chr4	31841276	31842438	Alu	12	6	6
chr4	35719769	35721813	Alu	29	6	23
chr4	36324317	36326153	Alu	8	5	3
chr4	40699740	40701775	Alu	15	8	7
chr4	41550126	41552108	L1	15	11	4
chr4	42087108	42089015	Alu	21	12	9
chr4	47006790	47007849	L1	10	5	5
chr4	53850841	53852062	Alu	9	4	5
chr4	54367292	54368521	L1	8	4	4
chr4	56436854	56438734	Alu	10	0	10
chr4	57257155	57259167	Alu	20	0	20
chr4	57716172	57718183	Alu	29	7	22
chr4	58917433	58918540	L1	8	5	3
chr4	58976208	58977294	Alu	10	7	3
chr4	61824096	61826120	Alu	25	7	18
chr4	64562176	64564190	Alu	6	2	4
chr4	65215747	65217756	Alu	34	6	28
chr4	67105624	67107623	Alu	29	7	22
chr4	67963770	67964806	Alu	6	0	6
chr4	70412754	70414689	Alu	9	4	5
chr4	70476007	70478031	Alu	25	2	23
chr4	70584471	70586487	Alu	7	1	6
chr4	72718845	72720796	Alu	14	5	9
chr4	73635058	73635070	Alu	8	8	0
chr4	75228925	75230222	Alu	8	0	8
chr4	75735462	75737440	Alu	11	3	8
chr4	76939769	76941644	Alu	11	9	2
chr4	79358188	79360197	Alu	14	4	10
chr4	82629133	82631154	Alu	18	5	13
chr4	83339760	83340760	Alu	12	11	1
chr4	86798652	86798702	Alu	19	19	0
chr4	94211336	94213363	Alu	11	0	11
chr4	101488057	101490090	Alu	20	7	13
chr4	103343628	103343678	L1	8	8	0
chr4	103774074	103775283	Alu	6	0	6
chr4	104743610	104745610	Alu	9	1	8
chr4	113087187	113089103	Alu	10	0	10
chr4	115132582	115132627	L1	9	9	0
chr4	115548928	115550855	Alu	20	7	13
chr4	116216391	116218326	Alu	14	0	14
chr4	120070717	120072681	Alu	9	2	7
chr4	120638902	120640918	Alu	19	3	16
chr4	120719101	120721024	Alu	7	2	5
chr4	122412802	122413892	Alu	15	10	5
chr4	125658028	125659836	Alu	6	2	4
chr4	127513930	127515077	Alu	15	9	6
chr4	133116884	133118851	Alu	12	3	9
chr4	134595424	134597397	L1	14	11	3
chr4	136804077	136805254	Alu	7	0	7
chr4	138813875	138815109	Alu	8	0	8
chr4	139224200	139226226	Alu	25	0	25
chr4	140209309	140211194	Alu	9	0	9
chr4	140938011	140939057	Alu	9	6	3
chr4	143257308	143259334	Alu	23	5	18
chr4	144419881	144421844	Alu	10	3	7
chr4	145394292	145396245	Alu	13	6	7
chr4	147224286	147226302	L1	10	0	10
chr4	148052979	148054972	Alu	23	9	14
chr4	151293678	151294919	Alu	11	6	5
chr4	152283441	152283466	Alu	13	13	0
chr4	156836675	156838328	Alu	12	8	4
chr4	166629104	166631080	Alu	16	8	8
chr4	167337784	167339745	Alu	21	9	12
chr4	169658774	169660133	Alu	20	0	20
chr4	169988127	169990200	Alu	19	0	19
chr4	170587838	170589852	Alu	12	5	7
chr4	170833587	170835579	Alu	45	14	31
chr4	172287857	172289829	Alu	7	2	5
chr4	174035404	174036628	L1	12	9	3
chr4	174148450	174150477	Alu	11	1	10
chr4	175533295	175535300	Alu	11	2	9
chr4	176720693	176721852	Alu	6	0	6
chr4	179197312	179199350	Alu	42	12	30
chr4	179443792	179445748	Alu	14	4	10
chr4	182641753	182643020	Alu	13	0	13
chr4	182687428	182689107	Alu	8	0	8
chr4	183255653	183257334	Alu	8	1	7
chr4	184378107	184379924	Alu	21	0	21
chr4	184542905	184544818	Alu	17	1	16
chr4	185050714	185052502	Alu	9	0	9
chr4	186360912	186362924	Alu	53	12	41
chr4	186381160	186383180	Alu	13	8	5
chr4	186492583	186494478	Alu	22	0	22
chr4	187093363	187094407	Alu	10	8	2
chr4	187097240	187098387	Alu	12	0	12
chr4	187371169	187373011	Alu	11	0	11
chr4	187850077	187851966	Alu	20	0	20
chr4	188861184	188863041	Alu	20	0	20
chr4	189064768	189066416	Alu	9	0	9
chr4	189187734	189189552	Alu	13	0	13
chr4	189263473	189265258	Alu	12	0	12
chr4	189362405	189364197	Alu	6	0	6
chr4	190562485	190564351	Alu	39	0	39
chr5	159121150	159123160	Alu	9	2	7
chr5	3128296	3130152	Alu	28	0	28
chr5	55688510	55689657	Alu	13	6	7
chr5	103463408	103465449	Alu	22	4	18
chr5	146636717	146638755	Alu	20	6	14
chr5	166606	168636	Alu	27	5	22
chr5	1584541	1586530	Alu	20	7	13
chr5	1811675	1813658	Alu	15	12	3
chr5	3994183	3996221	Alu	57	13	44
chr5	4074834	4076702	Alu	8	5	3
chr5	5594241	5596267	Alu	32	13	19
chr5	6217089	6219106	Alu	33	14	19
chr5	6283519	6285523	Alu	18	7	11
chr5	7187016	7189027	Alu	32	13	19
chr5	7506554	7508358	Alu	13	0	13
chr5	7845040	7847027	Alu	24	7	17
chr5	11391161	11391200	L1	6	6	0
chr5	14014830	14016698	Alu	34	21	13
chr5	17711606	17713577	Alu	12	2	10
chr5	19352276	19354086	L1	25	0	25
chr5	22751894	22753672	Alu	17	0	17
chr5	25232914	25234948	Alu	13	4	9
chr5	25834125	25836062	Alu	17	7	10
chr5	28840363	28841422	Alu	9	6	3
chr5	34458553	34460538	Alu	24	6	18
chr5	34753796	34755484	Alu	14	12	2
chr5	36791605	36793641	Alu	18	5	13
chr5	39291970	39293989	Alu	20	4	16
chr5	40181354	40182674	Alu	15	8	7
chr5	40981434	40983444	Alu	14	0	14
chr5	43540529	43542378	Alu	35	0	35
chr5	51431340	51433335	Alu	13	1	12
chr5	53494740	53495986	L1	8	0	8
chr5	55926967	55928911	Alu	16	5	11
chr5	58254795	58255920	Alu	6	1	5
chr5	61574649	61576717	Alu	7	4	3
chr5	61856127	61858137	Alu	11	4	7
chr5	64467770	64468949	Alu	6	0	6
chr5	64979392	64979407	Alu	8	8	0
chr5	73718909	73720056	Alu	16	9	7
chr5	78441871	78443858	Alu	6	3	3
chr5	84238715	84240602	L1	12	8	4
chr5	84543392	84545398	Alu	21	7	14
chr5	84929546	84930698	Alu	9	7	2
chr5	84958407	84960191	L1	12	0	12
chr5	85764779	85765922	Alu	10	7	3
chr5	86371697	86372822	Alu	7	2	5
chr5	89449937	89451746	L1	8	1	7
chr5	90818281	90820301	Alu	29	10	19
chr5	95393251	95395270	Alu	41	15	26
chr5	97843232	97844326	Alu	6	0	6
chr5	98972088	98973953	Alu	12	1	11
chr5	99093420	99094610	Alu	8	1	7
chr5	99298925	99300900	Alu	11	1	10
chr5	100059168	100061174	Alu	11	2	9
chr5	100496397	100498275	Alu	9	1	8
chr5	109480257	109480259	L1	12	12	0
chr5	111657676	111659686	Alu	14	5	9
chr5	112554895	112556742	Alu	22	0	22
chr5	113568423	113569556	Alu	7	0	7
chr5	114354262	114356267	Alu	21	3	18
chr5	114738743	114740753	Alu	32	14	18
chr5	117132267	117134217	Alu	14	4	10
chr5	123885852	123887799	Alu	10	0	10
chr5	124146814	124148830	Alu	15	5	10
chr5	125039877	125040877	L1	10	9	1
chr5	126324910	126326705	L1	9	0	9
chr5	130089881	130090916	L1	6	0	6
chr5	130852274	130854278	Alu	14	6	8
chr5	132169751	132171778	Alu	8	1	7
chr5	133761973	133763868	Alu	10	5	5
chr5	141394234	141394236	Alu	8	8	0
chr5	143009790	143011818	Alu	33	5	28
chr5	146368613	146370638	Alu	15	5	10
chr5	148095858	148096858	Alu	10	9	1
chr5	150985468	150986715	Alu	10	2	8
chr5	153935655	153937663	Alu	33	13	20
chr5	158716184	158718087	Alu	9	6	3
chr5	160530494	160532532	Alu	25	6	19
chr5	162231081	162232971	Alu	12	4	8
chr5	167793738	167795441	Alu	9	0	9
chr5	168910928	168912956	Alu	18	6	12
chr5	171734911	171735970	Alu	12	7	5
chr5	174759979	174761817	Alu	21	13	8
chr5	178725599	178727306	Alu	13	0	13
chr5	179055167	179056980	Alu	6	0	6
chr5	179619242	179621098	Alu	13	0	13
chr5	179729230	179731050	Alu	14	0	14
chr5	179743761	179745544	Alu	10	0	10
chr5	179881549	179883465	Alu	8	0	8
chr5	179920599	179921730	Alu	7	0	7
chr5	180090645	180092587	Alu	9	0	9
chr5	180348597	180350615	Alu	33	16	17
chr5	180368746	180369830	Alu	12	8	4
chr5	180701972	180703809	Alu	9	0	9
chr6	19136282	19138124	Alu	11	5	6
chr6	5487906	5489010	Alu	27	17	10
chr6	21331887	21333795	Alu	7	0	7
chr6	40925895	40927849	Alu	7	4	3
chr6	49560947	49562932	Alu	27	11	16
chr6	52804091	52806028	Alu	9	2	7
chr6	70957876	70959858	Alu	12	7	5
chr6	72253401	72255392	Alu	13	4	9
chr6	78363370	78365270	Alu	21	4	17
chr6	141769879	141771871	Alu	35	10	25
chr6	823557	825359	L1	23	0	23
chr6	1257278	1257321	Alu	11	11	0
chr6	2059015	2060185	Alu	8	0	8
chr6	2384507	2384509	Alu	6	6	0
chr6	2971595	2973630	Alu	31	5	26
chr6	6311840	6313644	Alu	7	0	7
chr6	8999406	8999455	Alu	10	10	0
chr6	9701234	9703269	Alu	32	6	26
chr6	10294603	10296493	Alu	19	9	10
chr6	11050754	11051876	Alu	14	11	3
chr6	12210757	12212456	Alu	13	0	13
chr6	13502105	13503931	L1	18	13	5
chr6	13520250	13522228	Alu	28	15	13
chr6	15687939	15689888	Alu	25	6	19
chr6	17248955	17250948	Alu	29	0	29
chr6	18345386	18347404	Alu	43	21	22
chr6	18898150	18900194	Alu	21	3	18
chr6	20886907	20888939	Alu	35	7	28
chr6	23224743	23226751	Alu	19	2	17
chr6	25708190	25710007	Alu	6	0	6
chr6	25897294	25899085	Alu	6	0	6
chr6	33572992	33575072	Alu	16	0	16
chr6	34653674	34655594	Alu	39	0	39
chr6	36021768	36021770	Alu	6	6	0
chr6	36967541	36969572	Alu	51	2	49
chr6	40045893	40047910	Alu	23	13	10
chr6	42669307	42671376	Alu	14	0	14
chr6	43894485	43896504	Alu	55	15	40
chr6	45259555	45261489	Alu	38	18	20
chr6	46310136	46311325	L1	9	0	9
chr6	51299078	51301109	Alu	28	4	24
chr6	51928705	51929797	Alu	7	3	4
chr6	52712602	52712631	Alu	6	6	0
chr6	53608681	53609986	Alu	14	10	4
chr6	53647815	53649751	Alu	8	1	7
chr6	54444695	54446500	Alu	9	0	9
chr6	54713588	54714696	Alu	6	1	5
chr6	57266483	57268274	Alu	11	3	8
chr6	57402534	57404565	Alu	59	10	49
chr6	57443972	57445968	Alu	20	6	14
chr6	57464242	57466164	Alu	13	7	6
chr6	57481704	57481716	Alu	9	9	0
chr6	57508297	57509431	Alu	37	12	25
chr6	66162967	66164980	Alu	23	7	16
chr6	67781401	67783334	Alu	8	2	6
chr6	68049629	68051454	Alu	13	4	9
chr6	68203408	68204534	Alu	10	8	2
chr6	68310304	68312331	Alu	11	4	7
chr6	68313050	68315031	Alu	18	8	10
chr6	71247728	71249548	Alu	6	4	2
chr6	73990940	73992727	Alu	18	5	13
chr6	74272594	74274529	Alu	8	0	8
chr6	74294006	74296020	Alu	7	3	4
chr6	74340732	74342761	Alu	17	5	12
chr6	74503837	74505790	Alu	6	2	4
chr6	77980566	77981566	L1	11	10	1
chr6	78842962	78844177	Alu	7	2	5
chr6	78963191	78964268	Alu	13	7	6
chr6	79175401	79177428	Alu	17	1	16
chr6	81266792	81267855	Alu	6	2	4
chr6	81380047	81382063	Alu	10	3	7
chr6	85053868	85055813	Alu	6	0	6
chr6	90581914	90583064	Alu	15	3	12
chr6	90729301	90731291	Alu	11	2	9
chr6	91124888	91126751	Alu	7	3	4
chr6	93575195	93577128	Alu	12	7	5
chr6	94930509	94931509	Alu	7	6	1
chr6	96508163	96510046	Alu	18	10	8
chr6	97685773	97687737	Alu	16	0	16
chr6	100406549	100408482	Alu	24	11	13
chr6	102283758	102283760	L1	15	15	0
chr6	104771697	104773647	Alu	14	8	6
chr6	110102014	110103980	Alu	10	7	3
chr6	110986307	110988264	Alu	12	1	11
chr6	116306108	116307347	Alu	11	7	4
chr6	116843176	116845167	Alu	16	9	7
chr6	116897835	116899700	Alu	16	9	7
chr6	117754885	117756884	Alu	19	4	15
chr6	120380197	120381268	Alu	7	1	6
chr6	120567247	120569278	Alu	17	3	14
chr6	122979052	122981002	Alu	21	16	5
chr6	124843326	124845127	Alu	10	0	10
chr6	124864506	124866531	Alu	17	9	8
chr6	125420414	125422307	Alu	6	0	6
chr6	129894097	129896065	Alu	13	6	7
chr6	131112287	131114223	Alu	15	6	9
chr6	131272533	131274482	Alu	8	4	4
chr6	133159107	133161028	Alu	10	4	6
chr6	135585382	135587239	Alu	13	1	12
chr6	137253202	137255122	Alu	16	7	9
chr6	139293720	139295741	Alu	17	4	13
chr6	142449101	142450194	L1	15	4	11
chr6	143950392	143952356	Alu	25	7	18
chr6	147042602	147042616	Alu	11	11	0
chr6	150909910	150911853	Alu	13	2	11
chr6	151026602	151027602	Alu	8	7	1
chr6	151414422	151414451	Alu	10	10	0
chr6	153166093	153166095	L1	17	17	0
chr6	153633346	153634370	Alu	10	7	3
chr6	157967737	157969655	L1	12	8	4
chr6	159165399	159166426	Alu	6	4	2
chr6	159203420	159205358	Alu	16	5	11
chr6	161485986	161487197	Alu	6	0	6
chr6	162277895	162277912	Alu	8	8	0
chr6	163013619	163014872	Alu	9	4	5
chr6	163813281	163815215	Alu	17	1	16
chr6	164161573	164162844	Alu	19	16	3
chr6	165823636	165825394	Alu	8	0	8
chr6	166278893	166280772	Alu	9	3	6
chr6	167123849	167125822	Alu	21	11	10
chr6	168987856	168989574	Alu	7	1	6
chr6	170499845	170501745	Alu	8	4	4
chr7	13663769	13665555	Alu	7	0	7
chr7	42646678	42648676	Alu	20	7	13
chr7	52788465	52789601	L1	9	6	3
chr7	82000916	82002830	Alu	9	4	5
chr7	104005266	104006390	Alu	6	0	6
chr7	123780361	123782233	Alu	32	7	25
chr7	125860729	125862754	Alu	21	11	10
chr7	322393	324144	Alu	7	0	7
chr7	904386	904388	Alu	9	9	0
chr7	969912	971084	Alu	12	0	12
chr7	3089702	3091728	Alu	17	4	13
chr7	6390107	6392056	Alu	11	2	9
chr7	7062370	7062372	Alu	6	6	0
chr7	17094589	17094633	L1	14	14	0
chr7	22852503	22854411	Alu	15	10	5
chr7	24258483	24258489	Alu	6	6	0
chr7	32639513	32641217	Alu	29	2	27
chr7	33182591	33184495	Alu	9	6	3
chr7	33194336	33196251	Alu	13	6	7
chr7	34491891	34493810	Alu	19	2	17
chr7	36251245	36253167	Alu	8	3	5
chr7	38472382	38474148	Alu	11	0	11
chr7	47550077	47552085	Alu	8	3	5
chr7	47669407	47671442	Alu	9	2	7
chr7	49056618	49058646	Alu	18	5	13
chr7	53357285	53359239	Alu	10	0	10
chr7	55368219	55369477	Alu	10	6	4
chr7	56243904	56245898	Alu	29	14	15
chr7	56277937	56278991	Alu	6	0	6
chr7	57345955	57347208	Alu	22	11	11
chr7	61527758	61529520	Alu	6	3	3
chr7	63880044	63881125	Alu	8	3	5
chr7	66077304	66079330	Alu	10	4	6
chr7	68757476	68758637	Alu	17	14	3
chr7	69968057	69970022	Alu	7	1	6
chr7	70187676	70188677	L1	8	7	1
chr7	72019583	72019624	Alu	6	6	0
chr7	73970121	73972135	Alu	37	6	31
chr7	78662006	78663174	Alu	10	3	7
chr7	80168132	80169705	Alu	7	0	7
chr7	82429509	82431548	Alu	10	5	5
chr7	84741957	84743939	Alu	13	3	10
chr7	85859682	85861688	Alu	12	7	5
chr7	88072580	88074590	Alu	16	3	13
chr7	89945815	89947834	Alu	8	3	5
chr7	94778095	94780014	Alu	12	8	4
chr7	94876498	94878500	Alu	12	1	11
chr7	95100182	95102174	Alu	22	9	13
chr7	97066522	97068488	Alu	6	1	5
chr7	100999403	101001389	Alu	33	13	20
chr7	102895578	102896645	Alu	7	5	2
chr7	103039667	103040812	L1	6	0	6
chr7	105144606	105146398	Alu	18	2	16
chr7	105465081	105466985	Alu	14	8	6
chr7	105563456	105565475	Alu	25	9	16
chr7	107370268	107371530	Alu	21	5	16
chr7	107828263	107830217	L1	10	8	2
chr7	109282338	109284373	Alu	30	0	30
chr7	111547341	111549376	Alu	30	2	28
chr7	111877863	111879842	Alu	20	3	17
chr7	113383357	113383367	L1	6	6	0
chr7	115864227	115866196	Alu	32	15	17
chr7	116760952	116762004	Alu	18	15	3
chr7	117355262	117357191	Alu	14	4	10
chr7	118082362	118084239	Alu	10	6	4
chr7	122209482	122210595	L1	17	0	17
chr7	123193582	123195516	Alu	9	4	5
chr7	124592015	124594023	Alu	22	8	14
chr7	125872870	125874866	Alu	14	6	8
chr7	125921879	125923850	Alu	20	8	12
chr7	127928327	127930242	Alu	22	17	5
chr7	128118393	128118416	Alu	9	9	0
chr7	128192963	128192982	Alu	10	10	0
chr7	128209024	128210088	Alu	12	8	4
chr7	129065563	129067482	Alu	28	13	15
chr7	133580647	133582576	Alu	25	0	25
chr7	136368792	136370624	Alu	13	7	6
chr7	138163416	138165451	Alu	37	4	33
chr7	138562508	138564540	Alu	35	11	24
chr7	139933225	139934417	Alu	12	9	3
chr7	141012607	141014565	Alu	16	8	8
chr7	141748305	141748307	Alu	14	14	0
chr7	142272445	142273445	Alu	9	8	1
chr7	142672788	142673837	Alu	6	3	3
chr7	144195683	144196683	Alu	13	12	1
chr7	144302693	144304670	Alu	25	3	22
chr7	144808326	144810298	Alu	8	3	5
chr7	145590011	145591969	Alu	19	9	10
chr7	147585610	147586753	Alu	6	3	3
chr7	148178417	148179663	Alu	18	8	10
chr7	150300922	150300939	L1	6	6	0
chr7	154381367	154383302	Alu	9	6	3
chr7	154858120	154859161	Alu	7	5	2
chr7	157227375	157229207	Alu	6	0	6
chr7	157448701	157449809	Alu	10	6	4
chr8	6043960	6045950	Alu	16	7	9
chr8	15547507	15549507	Alu	19	6	13
chr8	41269459	41271466	Alu	19	9	10
chr8	55000946	55002868	Alu	6	4	2
chr8	75447830	75449822	Alu	13	9	4
chr8	130906670	130908652	Alu	7	4	3
chr8	145569826	145571862	Alu	19	3	16
chr8	3625961	3627874	Alu	8	3	5
chr8	4452893	4452895	L1	10	10	0
chr8	9806891	9808045	Alu	8	2	6
chr8	12498046	12500006	Alu	8	3	5
chr8	13561205	13562205	Alu	6	5	1
chr8	15398510	15400330	Alu	6	2	4
chr8	16101814	16103832	Alu	22	13	9
chr8	24778106	24780120	Alu	21	4	17
chr8	24926536	24927536	L1	7	6	1
chr8	25171652	25173614	Alu	22	9	13
chr8	25276976	25277976	Alu	7	6	1
chr8	26072387	26074394	Alu	22	5	17
chr8	26166797	26167996	Alu	6	0	6
chr8	29008575	29009575	Alu	7	6	1
chr8	32358972	32361003	Alu	26	5	21
chr8	33760652	33762652	Alu	13	6	7
chr8	34064310	34066253	Alu	10	4	6
chr8	38863061	38865052	Alu	18	11	7
chr8	42038897	42040887	Alu	27	10	17
chr8	51391822	51393215	Alu	20	6	14
chr8	51441457	51443495	Alu	21	2	19
chr8	59614978	59616989	Alu	26	13	13
chr8	61525780	61527730	Alu	7	2	5
chr8	67684081	67685366	Alu	14	0	14
chr8	68980912	68982644	Alu	8	6	2
chr8	72398221	72399293	L1	9	4	5
chr8	73094171	73095205	Alu	8	3	5
chr8	74324949	74326896	Alu	23	12	11
chr8	75374361	75376341	Alu	19	9	10
chr8	81766581	81768608	Alu	14	4	10
chr8	81870989	81872751	Alu	12	0	12
chr8	83350481	83352489	Alu	14	4	10
chr8	85436281	85438288	Alu	17	7	10
chr8	87079407	87080578	Alu	12	10	2
chr8	87314941	87314956	L1	7	7	0
chr8	88756080	88758014	Alu	8	1	7
chr8	92676093	92678099	Alu	22	7	15
chr8	94162471	94162473	Alu	6	6	0
chr8	107207668	107208851	Alu	17	12	5
chr8	110348298	110350301	Alu	10	3	7
chr8	110369977	110370987	Alu	6	4	2
chr8	110515379	110515393	Alu	9	9	0
chr8	117046006	117047171	Alu	17	6	11
chr8	122662715	122664725	Alu	7	1	6
chr8	124679183	124680183	Alu	11	10	1
chr8	125461671	125462970	Alu	7	4	3
chr8	125888961	125890978	Alu	23	17	6
chr8	127118358	127120363	Alu	8	0	8
chr8	127864555	127866303	Alu	13	10	3
chr8	133767680	133769566	Alu	6	3	3
chr8	137061239	137063196	Alu	22	13	9
chr8	138294184	138296139	Alu	22	6	16
chr8	141047049	141049062	Alu	8	2	6
chr8	145920347	145921599	Alu	13	0	13
chr9	12975585	12977533	Alu	16	11	5
chr9	2210508	2212278	Alu	6	0	6
chr9	847896	849890	Alu	9	5	4
chr9	4709483	4711334	Alu	18	0	18
chr9	4814107	4815247	Alu	11	8	3
chr9	5346391	5348226	Alu	7	0	7
chr9	7851582	7853518	Alu	8	4	4
chr9	35917467	35919348	Alu	10	0	10
chr9	37595332	37596337	Alu	6	4	2
chr9	38766761	38767846	Alu	10	5	5
chr9	68433784	68435080	Alu	20	0	20
chr9	74543803	74545756	Alu	9	5	4
chr9	75542799	75543898	Alu	8	5	3
chr9	78400653	78402662	Alu	13	7	6
chr9	78951116	78953043	Alu	8	4	4
chr9	79056822	79058774	Alu	10	5	5
chr9	81595217	81597096	Alu	9	5	4
chr9	93057342	93058477	Alu	10	6	4
chr9	93193582	93194582	Alu	6	5	1
chr9	95281444	95283365	Alu	22	14	8
chr9	96886773	96888807	Alu	17	0	17
chr9	97313242	97315119	Alu	18	7	11
chr9	97386565	97387698	Alu	17	14	3
chr9	97449087	97450240	Alu	6	0	6
chr9	98333460	98334460	Alu	9	8	1
chr9	101089446	101091325	Alu	14	10	4
chr9	101357836	101357838	Alu	6	6	0
chr9	102785684	102787647	Alu	9	2	7
chr9	102848295	102850292	Alu	15	5	10
chr9	103361632	103363650	Alu	24	8	16
chr9	106075457	106077422	Alu	10	1	9
chr9	109234317	109236004	Alu	10	5	5
chr9	114868843	114869843	Alu	13	12	1
chr9	118082867	118084874	L1	7	0	7
chr9	123054209	123056195	Alu	24	18	6
chr9	134229206	134230206	Alu	7	6	1
chr9	139662825	139662866	Alu	6	6	0
chr9	139663017	139663019	Alu	6	6	0
chr9	140253391	140253416	Alu	7	7	0
chrX	18886932	18886934	Alu	14	14	0
chrX	76411756	76411790	L1	7	7	0
chrX	116838744	116838781	Alu	7	7	0
chrX	126290676	126290678	Alu	10	10	0
chrX	136349729	136349757	Alu	9	9	0
chrX	136957285	136957287	Alu	8	8	0
chrX	152001696	152001730	Alu	8	8	0
