# Supplementary material for: Comprehensive, integrated, and phased whole-genome analysis of the primary ENCODE cell line K562
Source: HighWire-hosted journal article supplement (doi:10.1101/gr.234948.118), 2019-02-08
Supplement: Supplemental_Table_S10.xlsx [file Supplemental_Table_S10.xlsx]

## Sheet: Sheet1
hg19 reference; 1-based genomic coordinate counting
Table S10. PCR Validations of K562 MEIs.
Alu primer	Primer sequence	Chromosome	MEI leftmost boundary	MEI rightmost boundary	PCR Product Size		Product Sequence	PCR and Sanger Validation
K562Aluchr1_100994097_Fwd	CCATCAATGATGACCTCAGTGACG	1	100993211	100995239	120		AGATACAGCAAATAGAAGTAATTTTTTTTCACCATCAATGATGACCTCAGTGACGTAGAAACAGGGTGGTAGCTCCTGGTTTTCTTGTTTCTTAATCAATATAATTTAGACTTTAAAATTTCATGGCCGGGCGCGGTGGCTCACGCCTGTA	YES
K562Aluchr1_100994097_Rev	TACAGGCGTGAGCCACC	1
K562Aluchr1_180857444_Fwd	CTGGTAAGCAGATTTCAGGTC	1	180856550	180858585	147		AAATCTGGTAAGCAGATTTCAGGTCATTATTGTTTTCTTTTAATGGTTTACATGAAATTTTCCTCTCAAAAAACAAGTACCTCTTACTGTATAACATTTGAGTTTTTAAAATTGAGATAGCAGGCCGGGCGCGGTGGCTCACGCCTGTAAT	YES
K562Aluchr1_180857444_Rev	ATTACAGGCGTGAGCCA	1
K562Aluchr1_225995491_Fwd	GTAATCCCAGTACTTTGGGAGG	1	225994595	225997450	151		GTAATCCCAGTACTTTGGGAGGCCAGGGCAGGCAAATCACTTGAGGTCAGGAGTTTGAGACCCGCCTGGCCAACATGGTGAAACCCCATCTCTACTAAAAATACAAAAATTAGCTGGGTGTGAGGCCGGGCGCGGTGGCTCACACCTGTAA	YES
K562Aluchr1_225995491_Rev	TTACAGGTGTGAGCCACC	1
K562Aluchr1_225996314_Fwd	GTCCTCAATCTGGTGTCCAA	1	225994595	225997450	120		CAGTCCCTGTTTTAGCTAGTCCTCAATTTGGTCCTCAATCTGGTGTCCAAGCCCCACCTCTGGCGTTAAGTCCTGACTCCTACCTGTTTCACCATCACTGCAGTTTTAAGAGTAACGAATGGCCGGGCGCGGTGGCTCACGCCTGTAATCC	YES
K562Aluchr1_225996314_Rev	GATTACAGGCGTGAGCCA	1
K562Aluchr1_241908497_Fwd	CCTCGGCCTATACGCATAC	1	241907610	241909628	141		ATATATTTACCCTCGGCCTATACGCATACGCCAGTTGATGACTCGAGTGAGCATCCTGATGTGTGAAAGTCTCACTTTTAAAAGTGTGAGCAGATGACAACAGCACGTGAAATAAAATCATGAGGCCGGGCGCGGTGGCTCACGCCTGTAA	NO
K562Aluchr1_241908497_Rev	TTACAGGCGTGAGCCAC	1
K562Aluchr2_160376321_Fwd	CTCCCAAAGTGCTGGGATTA	2	160375322	160377220	126		CCTCCCAAAGTGCTGGGATTACAGGCGTGAGCCACCACGCCTGGCCAAGGGACCTTTCTTTTTAACTGAAATGAGTACCTCTTTTCGTTGGTGATCTTCCTTCTATGATCCTGCCCATTACAACAGCTGGGAGTCCAATCTATGATGATGT	YES
K562Aluchr2_160376321_Rev	GCTGTTGTAATGGGCAGGAT	2
K562Aluchr2_176728180_Fwd	CCCTCCCAGGGAACAAATTA	2	176727286	176729309	140		TCTATAATCACCCCTCCCAGGGAACAAATTAACAGAAACTAAGAAGTTGCCTCTCTTAATGGCTTTGAAATTTAGTGAGAAATTTTGAAAAGAGAGCCACAGATAAGAACCTCCAATGGGCCGGGCGCGGTGGCTCACGCCTGTAATCCCA	YES
K562Aluchr2_176728180_Rev	TGGGATTACAGGCGTGAG	2
K562Aluchr12_46175156_Fwd	CTCCCAAAGTGCTGGGATTA	12	46174178	46175286	102		CTCCCAAAGTGCTGGGATTACAGGCGTGAGCCACCGCGCCTGGCCAGGCACATCAAATTTTATCAATTGAGTACTCAGTACTTGCCTAGTATAACTAAACCCTTAAAATATAACATGTTGATTATGTTTTGGAATAAAGGTCAGATGATCA	YES
K562Aluchr12_46175156_Rev	GGGTTTAGTTATACTAGGCAAG	12
K562Aluchr13_90947643_Fwd	Fail primer design AT rich 3'	13	90946658	90948636			CTGGGATTACAGGCGTGAGCCACCGCGCCCGGCCTGCAGTTTCATTACATGCTTGAAAAAACACTGATCATTTAGTTCAAGAAAATTTACTTTTAAATTGTATTTTTCTTTATGCAATTCAAATAAATGATCCTCTTAAATTTAACAAAAA
K562Aluchr13_90947643_Rev		13
K562Aluchr13_92161659_Fwd	TCCCAAAGTGCTGGGATTA	13	92160658	92162669	97		CGGCCTCCCAAAGTGCTGGGATTACAGGCGTGAGCCACCGCGCCCGGCCAACATATTCATATTTTAAGGATCAAATAGTGAGATAGTCATATTTGCATAGGCATTCTTATGAAAAGTTTTACTGTTTAAAAAGTTATGCTATAATAGATAT	YES
K562Aluchr13_92161659_Rev	GCCTATGCAAATATGACTATCTCAC	13
								Total Validation Rate: 88%
LINE1 primer
K562LINEchr1_179575362_Fwd	TTCCTATTCGGCCATCTTGG	1	179574368	179576245	65		TTCCTATTCGGCCATCTTGGCTCCTCCCCTGGTATATCTTCTTTAGTGAGAGGTCTGTTCAGGTATTTTGCCCATTTTTTAAAAATTGGATTGTTTCTTATTGCTGAGTTTTAAGAGTTCTTTGTTTTGTTTTGTTTTTAATAATAGTCTT	YES
K562LINEchr1_179575362_Rev	TACCTGAACAGACCTCTCAC	1
K562LINEchr2_147020806_Fwd	CAGTCCCTGCTGTGTAATTGT	2	147020758	147021932	131		TGTCTAGCCAGAATTCATACAGTCCCTGCTGTGTAATTGTAGCAAAGTCCTTTTGATTATTTCAGAAATCTGAGGGGACCTGACAGCTCAAAATACTATCTGCATTTTTATTTACTATTAGCAATCCTAAGCCAAAAGAACAAAGCTGGAG	YES
K562LINEchr2_147020806_Rev	TCCAGCTTTGTTCTTTTGGCT	2
K562LINEchr3_181192723_Fwd	CAGTGGGTGTTGTAGTCTCC	3	181191827	181193864	115		TTCTGTCTCCATGATCTGTCTAATATTGACAGTGGGTGTTGTAGTCTCCCACTATTATTGTATGGGAGTCTAAGTCTATTTATAAGTCTCTGAGAACTTAGTTTAAGAATCTGGGTGCTCCTAAATGCCTACAAGAGAAAGCAGGAAAGAT	YES
K562LINEchr3_181192723_Rev	CTGCTTTCTCTTGTAGGCAT	3
K562LINEchr4_41551099_Fwd	GATGGCCAGTGATGATGAGC	4	41550126	41552108	112		AGATGATATCTCATAGTGGTTTTGATTTGCATTTCTCTGATGGCCAGTGATGATGAGCATTTCTTCTGTCTCACTATGTTGCCTGGGCTGGTCTCAAACTCCCTGACTCCAGCAACCATCCTGCCTTGGCCTGCCGAAGTGCTGGGATTAC	YES
K562LINEchr4_41551099_Rev	TAATCCCAGCACTTCGGCA	4
K562LINEchr4_134596304_Fwd	AGCCAAATCTTTCTAACCTCAAACT	4	134595424	134597397	140		TAATTAGAAGCCAAATCTTTCTAACCTCAAACTCTTTCCTTAAAACACTAAATTATTCTTTCCTGCTTTTTAGCCTAAGCCTGCTCATAACAGCTTACTTCATACTCTAAGAAACATATACCCAAATGTCCAACAATGATAGACTGGATTA	YES
K562LINEchr4_134596304_Rev	TCCAGTCTATCATTGTTGGACATTT	4
K562LINEchr6_13502947_Fwd	ACTGTGTGCTAAAACTGTATGTAAA	6	13502105	13503931	142		ACTGTGTGCTAAAACTGTATGTAAATTAAACTTCAATACATGGCTTAAAAAATAGACTGGGAAGTCAGCAGTGGTTAATTTTACATGTCAAATGTAAAAATGAGAGTCGAGGAGGAGGAGCCAAGATGGCCGAATAGGAACAGCTCCGGTC	YES
K562LINEchr6_13502947_Rev	TGTTCCTATTCGGCCATCTTG	6
K562LINEchr6_77980650_Fwd	TGGCTGCATAAATGTCTTCT	6	77980566	77981566	92		ATGTGTTTTTTGGCTGCATAAATGTCTTCTTTTGAGAAGTGTCATACTGTTGTCTCTGCACAGAACTCTGCTGTCTCTTAACCTAGCCAATTCCTTCTCACCTTTTTAGTTCCAACTTTCTTGTTTCTTCCAACTACTCACAGTACAAAGG	YES
K562LINEchr6_77980650_Rev	GGTGAGAAGGAATTGGCTAGG	6
K562LINEchr11_48755727_Fwd	CTCAACCAGGAAGCACAA	11	48755713	48756713	150		CCTCAACCAGGAAGCACAAGGGGTCAGGGAATTCCCTTTCCTAGTCAAAGAAAGGGGTGACAGAAGGCACCTGAAAATTGGGTCACTCCCACCCTAACACTGCACTTTTCCAACAGGCATAAAAATGATGAGTTCATATCCTTTGTAGGGA	YES
K562LINEchr11_48755727_Rev	TCCCTACAAAGGATATGAACTC	11
K562LINEchr11_134305648_Fwd	CGATAGTTTACTGAGAATGATGGT	11	134305468	134306632	105		ATGCGGTGTTTGGTTTTTTGTTCTTGCGATAGTTTACTGAGAATGATGGTTTCCAATTTCATCCATGTCTCACCGAACCTTTCTGAGCTTTTATTCTCTTACCTATTTAATGAGAGTGGTGTGTGAGGGTCCACCAGGTAATCTGAGTGAT	YES
K562LINEchr11_134305648_Rev	GACCCTCACACACCACTCT	11
K562LINEchr15_37707890_Fwd	TGTAAAAGTGTTCCTATTTCTCCAC	15	37707042	37708042	134		TGTAAAAGTGTTCCTATTTCTCCACATCCTCACTTGTTTCTTTTTTTACTTTTTAAAATGTGCTTAAAACAAAATATTTTAAAAATCACATATGTAGCTCACATTTTATTTTATTTGGGCATGCTGGTTGAGAGCTTTCTATTAAGACAGA	YES
K562LINEchr15_37707890_Rev	CTCTCAACCAGCATGCCCA	15
								Total Validation Rate: 100%

## Sheet: Sheet2
hg19 reference; 1-based genomic coordinate counting
Table S10. PCR Validations of K562 REIs.
	Alu primer	Primer sequence	Chromosome	REI leftmost boundary	REI rightmost boundary	PCR Product Size	Product Sequence	PCR and Sanger Validation
Alu primer Validation rate = 88%	K562Aluchr1_100994097_Fwd	CCATCAATGATGACCTCAGTGACG	1	100993211	100995239	120	AGATACAGCAAATAGAAGTAATTTTTTTTCACCATCAATGATGACCTCAGTGACGTAGAAACAGGGTGGTAGCTCCTGGTTTTCTTGTTTCTTAATCAATATAATTTAGACTTTAAAATTTCATGGCCGGGCGCGGTGGCTCACGCCTGTA	YES
	K562Aluchr1_100994097_Rev	TACAGGCGTGAGCCACC
	K562Aluchr1_180857444_Fwd	CTGGTAAGCAGATTTCAGGTC	1	180856550	180858585	147	AAATCTGGTAAGCAGATTTCAGGTCATTATTGTTTTCTTTTAATGGTTTACATGAAATTTTCCTCTCAAAAAACAAGTACCTCTTACTGTATAACATTTGAGTTTTTAAAATTGAGATAGCAGGCCGGGCGCGGTGGCTCACGCCTGTAAT	YES
	K562Aluchr1_180857444_Rev	ATTACAGGCGTGAGCCA
	K562Aluchr1_225995491_Fwd	GTAATCCCAGTACTTTGGGAGG	1	225994595	225997450	151	GTAATCCCAGTACTTTGGGAGGCCAGGGCAGGCAAATCACTTGAGGTCAGGAGTTTGAGACCCGCCTGGCCAACATGGTGAAACCCCATCTCTACTAAAAATACAAAAATTAGCTGGGTGTGAGGCCGGGCGCGGTGGCTCACACCTGTAA	YES
	K562Aluchr1_225995491_Rev	TTACAGGTGTGAGCCACC
	K562Aluchr1_225996314_Fwd	GTCCTCAATCTGGTGTCCAA	1	225994595	225997450	120	CAGTCCCTGTTTTAGCTAGTCCTCAATTTGGTCCTCAATCTGGTGTCCAAGCCCCACCTCTGGCGTTAAGTCCTGACTCCTACCTGTTTCACCATCACTGCAGTTTTAAGAGTAACGAATGGCCGGGCGCGGTGGCTCACGCCTGTAATCC	YES
	K562Aluchr1_225996314_Rev	GATTACAGGCGTGAGCCA
	K562Aluchr1_241908497_Fwd	CCTCGGCCTATACGCATAC	1	241907610	241909628	141	ATATATTTACCCTCGGCCTATACGCATACGCCAGTTGATGACTCGAGTGAGCATCCTGATGTGTGAAAGTCTCACTTTTAAAAGTGTGAGCAGATGACAACAGCACGTGAAATAAAATCATGAGGCCGGGCGCGGTGGCTCACGCCTGTAA	NO
	K562Aluchr1_241908497_Rev	TTACAGGCGTGAGCCAC
	K562Aluchr2_160376321_Fwd	CTCCCAAAGTGCTGGGATTA	2	160375322	160377220	126	CCTCCCAAAGTGCTGGGATTACAGGCGTGAGCCACCACGCCTGGCCAAGGGACCTTTCTTTTTAACTGAAATGAGTACCTCTTTTCGTTGGTGATCTTCCTTCTATGATCCTGCCCATTACAACAGCTGGGAGTCCAATCTATGATGATGT	YES
	K562Aluchr2_160376321_Rev	GCTGTTGTAATGGGCAGGAT
	K562Aluchr2_176728180_Fwd	CCCTCCCAGGGAACAAATTA	2	176727286	176729309	140	TCTATAATCACCCCTCCCAGGGAACAAATTAACAGAAACTAAGAAGTTGCCTCTCTTAATGGCTTTGAAATTTAGTGAGAAATTTTGAAAAGAGAGCCACAGATAAGAACCTCCAATGGGCCGGGCGCGGTGGCTCACGCCTGTAATCCCA	YES
	K562Aluchr2_176728180_Rev	TGGGATTACAGGCGTGAG
	K562Aluchr12_46175156_Fwd	CTCCCAAAGTGCTGGGATTA	12	46174178	46175286	102	CTCCCAAAGTGCTGGGATTACAGGCGTGAGCCACCGCGCCTGGCCAGGCACATCAAATTTTATCAATTGAGTACTCAGTACTTGCCTAGTATAACTAAACCCTTAAAATATAACATGTTGATTATGTTTTGGAATAAAGGTCAGATGATCA	YES
	K562Aluchr12_46175156_Rev	GGGTTTAGTTATACTAGGCAAG
	K562Aluchr13_90947643_Fwd	Fail primer design AT rich 3'	13	90946658	90948636	N/A	CTGGGATTACAGGCGTGAGCCACCGCGCCCGGCCTGCAGTTTCATTACATGCTTGAAAAAACACTGATCATTTAGTTCAAGAAAATTTACTTTTAAATTGTATTTTTCTTTATGCAATTCAAATAAATGATCCTCTTAAATTTAACAAAAA	N/A
	K562Aluchr13_90947643_Rev
	K562Aluchr13_92161659_Fwd	TCCCAAAGTGCTGGGATTA	13	92160658	92162669	97	CGGCCTCCCAAAGTGCTGGGATTACAGGCGTGAGCCACCGCGCCCGGCCAACATATTCATATTTTAAGGATCAAATAGTGAGATAGTCATATTTGCATAGGCATTCTTATGAAAAGTTTTACTGTTTAAAAAGTTATGCTATAATAGATAT	YES
	K562Aluchr13_92161659_Rev	GCCTATGCAAATATGACTATCTCAC
LINE1 primer Validation rate = 100%	K562LINEchr1_179575362_Fwd	TTCCTATTCGGCCATCTTGG	1	179574368	179576245	65	TTCCTATTCGGCCATCTTGGCTCCTCCCCTGGTATATCTTCTTTAGTGAGAGGTCTGTTCAGGTATTTTGCCCATTTTTTAAAAATTGGATTGTTTCTTATTGCTGAGTTTTAAGAGTTCTTTGTTTTGTTTTGTTTTTAATAATAGTCTT	YES
	K562LINEchr1_179575362_Rev	TACCTGAACAGACCTCTCAC
	K562LINEchr2_147020806_Fwd	CAGTCCCTGCTGTGTAATTGT	2	147020758	147021932	131	TGTCTAGCCAGAATTCATACAGTCCCTGCTGTGTAATTGTAGCAAAGTCCTTTTGATTATTTCAGAAATCTGAGGGGACCTGACAGCTCAAAATACTATCTGCATTTTTATTTACTATTAGCAATCCTAAGCCAAAAGAACAAAGCTGGAG	YES
	K562LINEchr2_147020806_Rev	TCCAGCTTTGTTCTTTTGGCT
	K562LINEchr3_181192723_Fwd	CAGTGGGTGTTGTAGTCTCC	3	181191827	181193864	115	TTCTGTCTCCATGATCTGTCTAATATTGACAGTGGGTGTTGTAGTCTCCCACTATTATTGTATGGGAGTCTAAGTCTATTTATAAGTCTCTGAGAACTTAGTTTAAGAATCTGGGTGCTCCTAAATGCCTACAAGAGAAAGCAGGAAAGAT	YES
	K562LINEchr3_181192723_Rev	CTGCTTTCTCTTGTAGGCAT
	K562LINEchr4_41551099_Fwd	GATGGCCAGTGATGATGAGC	4	41550126	41552108	112	AGATGATATCTCATAGTGGTTTTGATTTGCATTTCTCTGATGGCCAGTGATGATGAGCATTTCTTCTGTCTCACTATGTTGCCTGGGCTGGTCTCAAACTCCCTGACTCCAGCAACCATCCTGCCTTGGCCTGCCGAAGTGCTGGGATTAC	YES
	K562LINEchr4_41551099_Rev	TAATCCCAGCACTTCGGCA
	K562LINEchr4_134596304_Fwd	AGCCAAATCTTTCTAACCTCAAACT	4	134595424	134597397	140	TAATTAGAAGCCAAATCTTTCTAACCTCAAACTCTTTCCTTAAAACACTAAATTATTCTTTCCTGCTTTTTAGCCTAAGCCTGCTCATAACAGCTTACTTCATACTCTAAGAAACATATACCCAAATGTCCAACAATGATAGACTGGATTA	YES
	K562LINEchr4_134596304_Rev	TCCAGTCTATCATTGTTGGACATTT
	K562LINEchr6_13502947_Fwd	ACTGTGTGCTAAAACTGTATGTAAA	6	13502105	13503931	142	ACTGTGTGCTAAAACTGTATGTAAATTAAACTTCAATACATGGCTTAAAAAATAGACTGGGAAGTCAGCAGTGGTTAATTTTACATGTCAAATGTAAAAATGAGAGTCGAGGAGGAGGAGCCAAGATGGCCGAATAGGAACAGCTCCGGTC	YES
	K562LINEchr6_13502947_Rev	TGTTCCTATTCGGCCATCTTG
	K562LINEchr6_77980650_Fwd	TGGCTGCATAAATGTCTTCT	6	77980566	77981566	92	ATGTGTTTTTTGGCTGCATAAATGTCTTCTTTTGAGAAGTGTCATACTGTTGTCTCTGCACAGAACTCTGCTGTCTCTTAACCTAGCCAATTCCTTCTCACCTTTTTAGTTCCAACTTTCTTGTTTCTTCCAACTACTCACAGTACAAAGG	YES
	K562LINEchr6_77980650_Rev	GGTGAGAAGGAATTGGCTAGG
	K562LINEchr11_48755727_Fwd	CTCAACCAGGAAGCACAA	11	48755713	48756713	150	CCTCAACCAGGAAGCACAAGGGGTCAGGGAATTCCCTTTCCTAGTCAAAGAAAGGGGTGACAGAAGGCACCTGAAAATTGGGTCACTCCCACCCTAACACTGCACTTTTCCAACAGGCATAAAAATGATGAGTTCATATCCTTTGTAGGGA	YES
	K562LINEchr11_48755727_Rev	TCCCTACAAAGGATATGAACTC
	K562LINEchr11_134305648_Fwd	CGATAGTTTACTGAGAATGATGGT	11	134305468	134306632	105	ATGCGGTGTTTGGTTTTTTGTTCTTGCGATAGTTTACTGAGAATGATGGTTTCCAATTTCATCCATGTCTCACCGAACCTTTCTGAGCTTTTATTCTCTTACCTATTTAATGAGAGTGGTGTGTGAGGGTCCACCAGGTAATCTGAGTGAT	YES
	K562LINEchr11_134305648_Rev	GACCCTCACACACCACTCT
	K562LINEchr15_37707890_Fwd	TGTAAAAGTGTTCCTATTTCTCCAC	15	37707042	37708042	134	TGTAAAAGTGTTCCTATTTCTCCACATCCTCACTTGTTTCTTTTTTTACTTTTTAAAATGTGCTTAAAACAAAATATTTTAAAAATCACATATGTAGCTCACATTTTATTTTATTTGGGCATGCTGGTTGAGAGCTTTCTATTAAGACAGA	YES
	K562LINEchr15_37707890_Rev	CTCTCAACCAGCATGCCCA
