# Supplementary material for: Comprehensive, integrated, and phased whole-genome analysis of the primary ENCODE cell line K562
Source: HighWire-hosted journal article supplement (doi:10.1101/gr.234948.118), 2019-02-08
Supplement: Supplemental_Table_S11.xlsx [file Supplemental_Table_S11.xlsx]

## Sheet: Sheet1
hg19 reference; 1-based genomic coordinate counting
Table S9 Allele Specific Expression
Chr	Position	Ref allele	# RNA-seq reads of ref allele	Alt allele	# RNA-seq reads of alt allele	Frequency of alt allele in WGS	Genotype in WGS	Phased Genotype	CN	Binomial test p=0.5	Binomial test p=AF	Gene Overlap
1	843405	A	6	G	22	AF=0.5	0/0/1/1	0|1	4	0.00371917	0.00371917	None
1	882033	G	36	A	15	AF=0.5	0/0/1/1	1|0	4	0.00460131	0.00460131	NOC2L
1	896271	C	42	T	14	AF=0.5	0/0/1/1	0|1	4	0.000234446	0.000234446	KLHL17
1	900505	G	79	C	134	AF=0.5	0/0/1/1	1|0	4	0.000200149	0.000200149	KLHL17
1	935222	C	19	A	40	AF=0.25	0/0/0/1	1|0	4	0.0086415	5.76597e-12	HES4
1	936111	C	26	T	64	AF=0.5	0/0/1/1	1|0	4	7.65707e-05	7.65707e-05	None
1	949608	G	134	A	186	AF=0.5	0/0/1/1	0|1	4	0.00428574	0.00428574	ISG15
1	967658	C	0	T	11	AF=0.5	0/0/1/1	1|0	4	0.000976562	0.000976562	AGRN
1	974180	G	1	T	39	AF=0.5	0/0/1/1	1|0	4	7.45786e-11	7.45786e-11	AGRN
1	974199	C	1	T	37	AF=0.5	0/0/1/1	1|0	4	2.83762e-10	2.83762e-10	AGRN
1	974225	A	1	G	31	AF=0.5	0/0/1/1	1|0	4	1.53668e-08	1.53668e-08	AGRN
1	974296	A	8	G	37	AF=0.5	0/0/1/1	1|0	4	1.53741e-05	1.53741e-05	AGRN
1	974570	T	0	G	11	AF=0.5	0/0/1/1	1|0	4	0.000976562	0.000976562	AGRN
1	974662	G	0	T	14	AF=0.5	0/0/1/1	1|0	4	0.00012207	0.00012207	AGRN
1	981931	A	19	G	72	AF=0.5	0/0/1/1	1|0	4	1.96713e-08	1.96713e-08	AGRN
1	982444	A	21	G	8	AF=0.5	0/0/1/1	1|0	4	0.0241195	0.0241195	AGRN
1	982513	T	10	C	70	AF=0.5	0/0/1/1	1|0	4	3.16129e-12	3.16129e-12	AGRN
1	987670	T	28	G	13	AF=0.5	0/0/1/1	1|0	4	0.0275332	0.0275332	AGRN
1	988503	A	2	T	52	AF=0.5	0/0/1/1	1|0	4	1.64979e-13	1.64979e-13	AGRN
1	988932	G	1	C	19	AF=0.5	0/0/1/1	1|0	4	4.00543e-05	4.00543e-05	AGRN
1	990517	C	204	T	430	AF=0.5	0/0/1/1	1|0	4	1.67037e-19	1.67037e-19	AGRN
1	990773	C	234	T	121	AF=0.5	0/0/1/1	1|0	4	2.04656e-09	2.04656e-09	AGRN
1	990806	G	323	A	178	AF=0.5	0/0/1/1	1|0	4	9.29395e-11	9.29395e-11	AGRN
1	990984	G	351	A	244	AF=0.5	0/0/1/1	1|0	4	1.32106e-05	1.32106e-05	AGRN
1	1002932	C	0	G	10	AF=0.5	0/0/1/1	1|0	4	0.00195312	0.00195312	None
1	1018562	C	13	T	48	AF=0.5	0/0/1/1	1|0	4	7.66517e-06	7.66517e-06	C1orf159
1	1019175	C	25	G	5	AF=0.5	0/0/1/1	1|0	4	0.000324914	0.000324914	C1orf159
1	1019180	T	24	C	5	AF=0.5	0/0/1/1	1|0	4	0.000546113	0.000546113	C1orf159
1	1031540	A	0	G	19	AF=0.5	0/0/1/1	1|0	4	3.8147e-06	3.8147e-06	C1orf159
1	1037047	C	0	T	19	AF=0.5	0/0/1/1	0|1	4	3.8147e-06	3.8147e-06	C1orf159
1	1156131	T	22	C	42	AF=0.5	0/0/1/1	0|1	4	0.0168582	0.0168582	SDF4
1	1170192	A	19	G	62	AF=0.5	0/0/1/1	1|0	4	1.77307e-06	1.77307e-06	B3GALT6
1	1212649	T	0	C	11	AF=0.5	0/0/1/1	0|1	4	0.000976562	0.000976562	None
1	1215424	T	7	C	29	AF=0.5	0/0/1/1	0|1	4	0.000312551	0.000312551	None
1	1223385	G	0	C	18	AF=0.75	0/1/1/1	0|1	4	7.62939e-06	0.0110595	SCNN1D
1	1239935	A	0	C	29	AF=0.5	0/0/1/1	0|1	4	3.72529e-09	3.72529e-09	ACAP3
1	1329803	A	8	G	24	AF=0.5	0/0/1/1	0|1	4	0.00700037	0.00700037	CCNL2
1	1333598	C	1	A	13	AF=0.5	0/0/1/1	0|1	4	0.00183105	0.00183105	CCNL2
1	1334475	G	643	C	820	AF=0.5	0/0/1/1	1|0	4	4.09069e-06	4.09069e-06	CCNL2
1	1337334	G	203	T	77	AF=0.5	0/0/1/1	0|1	4	2.92062e-14	2.92062e-14	LOC148413, MRPL20
1	1337592	G	1420	C	565	AF=0.25	0/0/0/1	0/1	4	1.48418e-84	0.000463372	MRPL20
1	1337837	A	35	G	127	AF=0.5	0/0/1/1	0|1	4	1.85091e-13	1.85091e-13	MRPL20
1	1338973	A	24	G	50	AF=0.5	0/0/1/1	0|1	4	0.00337223	0.00337223	MRPL20
1	1342612	G	1822	C	1964	AF=0.5	0/0/1/1	0|1	4	0.0219194	0.0219194	MRPL20
1	1431521	C	67	T	41	AF=0.5	0/0/1/1	1|0	4	0.0157493	0.0157493	ATAD3B
1	1483055	G	13	A	3	AF=0.5	0/0/1/1	1|0	4	0.0212708	0.0212708	SSU72
1	1549720	C	2	T	43	AF=0.5	0/0/1/1	1|0	4	5.88898e-11	5.88898e-11	None
1	1550702	A	4	G	41	AF=0.5	0/0/1/1	1|0	4	9.33488e-09	9.33488e-09	None
1	1551428	C	32	T	10	AF=0.5	0/0/1/1	1|0	4	0.000940674	0.000940674	MIB2
1	1564194	C	0	T	18	AF=0.5	0/0/1/1	1|0	4	7.62939e-06	7.62939e-06	MIB2
1	1585597	A	0	G	16	AF=0.5	0/0/1/1	1|0	4	3.05176e-05	3.05176e-05	CDK11B
1	1590526	G	5	C	21	AF=0.5	0/0/1/1	1|0	4	0.00249392	0.00249392	CDK11B
1	1590575	G	1	A	21	AF=0.5	0/0/1/1	1|0	4	1.09673e-05	1.09673e-05	CDK11B
1	1596974	C	137	T	75	AF=0.5	0/0/1/1	1|0	4	2.4691e-05	2.4691e-05	CDK11B, SLC35E2B
1	1602536	G	0	C	10	AF=0.5	0/0/1/1	1|0	4	0.00195312	0.00195312	CDK11B, SLC35E2B
1	1602787	G	5	T	34	AF=0.5	0/0/1/1	1|0	4	2.42991e-06	2.42991e-06	CDK11B, SLC35E2B
1	1603434	G	36	T	10	AF=0.5	0/0/1/1	1|0	4	0.000156417	0.000156417	CDK11B, SLC35E2B
1	1611653	T	0	C	11	AF=0.5	0/0/1/1	1|0	4	0.000976562	0.000976562	CDK11B, SLC35E2B
1	1647814	T	220	C	131	AF=0.5	0/0/1/1	1|0	4	2.34536e-06	2.34536e-06	CDK11A, CDK11B, SLC35E2B
1	1650807	T	28	C	179	AF=0.5	0/0/1/1	0|1	4	3.91716e-28	3.91716e-28	CDK11A, CDK11B, SLC35E2B
1	1650832	A	172	G	57	AF=0.5	0/0/1/1	1|0	4	1.34097e-14	1.34097e-14	CDK11A, CDK11B, SLC35E2B
1	1650845	G	56	A	126	AF=0.5	0/0/1/1	0|1	4	2.25669e-07	2.25669e-07	CDK11A, CDK11B, SLC35E2B
1	1686081	G	584	A	474	AF=0.5	0/0/1/1	1|0	4	0.000797152	0.000797152	NADK
1	2110260	G	0	A	15	AF=0.5	0/0/1/1	1|0	4	6.10352e-05	6.10352e-05	PRKCZ
1	2117155	G	0	A	11	AF=0.5	0/0/1/1	1|0	4	0.000976562	0.000976562	C1orf86
1	2118539	T	0	C	12	AF=0.5	0/0/1/1	1|0	4	0.000488281	0.000488281	C1orf86
1	2121118	C	145	T	69	AF=0.5	0/0/1/1	1|0	4	2.22164e-07	2.22164e-07	C1orf86
1	2238237	A	88	T	33	AF=0.5	0/0/1/1	1|0	4	5.93078e-07	5.93078e-07	SKI
1	2240383	C	57	T	28	AF=0.5	0/0/1/1	0|1	4	0.00219491	0.00219491	SKI
1	2294844	C	2	T	11	AF=0.5	0/0/1/1	0|1	4	0.0224609	0.0224609	MORN1
1	2297935	A	0	T	21	AF=0.5	0/0/1/1	1|0	4	9.53674e-07	9.53674e-07	MORN1
1	2297994	G	0	C	20	AF=0.5	0/0/1/1	1|0	4	1.90735e-06	1.90735e-06	MORN1
1	2298255	A	2	G	29	AF=0.5	0/0/1/1	1|0	4	4.62867e-07	4.62867e-07	MORN1
1	2298636	G	0	A	10	AF=0.5	0/0/1/1	1|0	4	0.00195312	0.00195312	MORN1
1	2300157	C	8	A	23	AF=0.5	0/0/1/1	1|0	4	0.0106738	0.0106738	MORN1
1	2324336	T	169	C	97	AF=0.5	0/0/1/1	1|0	4	1.1954e-05	1.1954e-05	RER1
1	2330002	A	0	G	25	AF=0.5	0/0/1/1	0|1	4	5.96046e-08	5.96046e-08	RER1
1	2335969	C	155	G	99	AF=0.5	0/0/1/1	1|0	4	0.000533055	0.000533055	RER1
1	2336210	C	124	T	34	AF=0.5	0/0/1/1	1|0	4	3.11828e-13	3.11828e-13	RER1
1	2337032	C	160	T	75	AF=0.5	0/0/1/1	1|0	4	3.04652e-08	3.04652e-08	PEX10
1	2339395	A	20	G	41	AF=0.5	0/0/1/1	1|0	4	0.00985345	0.00985345	PEX10
1	2340200	T	55	C	32	AF=0.5	0/0/1/1	1|0	4	0.0178276	0.0178276	PEX10
1	3389727	C	20	T	7	AF=0.5	0/0/1/1	0|1	4	0.0191573	0.0191573	ARHGEF16
1	3650317	C	0	A	15	AF=0.5	0/0/1/1	1|0	4	6.10352e-05	6.10352e-05	TP73
1	3696000	T	12	C	40	AF=0.5	0/0/1/1	1|0	4	0.000127539	0.000127539	None
1	3696890	A	239	C	192	AF=0.5	0/0/1/1	1|0	4	0.0265942	0.0265942	LRRC47
1	3697137	G	218	T	154	AF=0.5	0/0/1/1	0|1	4	0.00106207	0.00106207	LRRC47
1	3730435	T	7	C	43	AF=0.5	0/0/1/1	1|0	4	2.09868e-07	2.09868e-07	CEP104
1	3733724	G	0	A	12	AF=0.5	0/0/1/1	0|1	4	0.000488281	0.000488281	CEP104
1	3734447	G	0	A	20	AF=0.5	0/0/1/1	1|0	4	1.90735e-06	1.90735e-06	CEP104
1	3741211	T	9	C	21	AF=0.5	0/0/1/1	1|0	4	0.0427739	0.0427739	CEP104
1	3742179	G	0	A	12	AF=0.5	0/0/1/1	1|0	4	0.000488281	0.000488281	CEP104
1	3745721	C	0	T	11	AF=0.5	0/0/1/1	1|0	4	0.000976562	0.000976562	CEP104
1	3751278	C	0	G	14	AF=0.5	0/0/1/1	0|1	4	0.00012207	0.00012207	CEP104
1	3763864	G	10	A	26	AF=0.5	0/0/1/1	0|1	4	0.011331	0.011331	CEP104
1	3768568	T	0	C	23	AF=0.5	0/0/1/1	1|0	4	2.38419e-07	2.38419e-07	CEP104
1	3773511	G	68	A	159	AF=0.25	0/0/0/1	1|0	4	1.4106e-09	6.15485e-46	CEP104
1	3773588	C	113	G	98	AF=0.75	0/1/1/1	0|1	4	0.335161	8.48372e-19	CEP104
1	3776166	A	6	G	19	AF=0.5	0/0/1/1	1|0	4	0.0146333	0.0146333	DFFB
1	3776190	A	3	G	12	AF=0.5	0/0/1/1	1|0	4	0.0351562	0.0351562	DFFB
1	3782115	G	14	A	33	AF=0.5	0/0/1/1	1|0	4	0.00794273	0.00794273	DFFB
1	3783898	C	0	T	14	AF=0.5	0/0/1/1	0|1	4	0.00012207	0.00012207	DFFB
1	3800242	A	89	G	154	AF=0.5	0/0/1/1	1|0	4	3.65128e-05	3.65128e-05	DFFB
1	3800480	G	64	T	41	AF=0.5	0/0/1/1	1|0	4	0.0313018	0.0313018	DFFB
1	3801141	T	46	G	19	AF=0.5	0/0/1/1	0|1	4	0.00109008	0.00109008	DFFB
1	3801320	A	52	T	133	AF=0.5	0/0/1/1	1|0	4	2.26754e-09	2.26754e-09	DFFB
1	3807388	G	336	A	209	AF=0.5	0/0/1/1	0|1	4	5.92922e-08	5.92922e-08	C1orf174
1	3812661	C	0	T	32	AF=0.5	0/0/1/1	0|1	4	4.65661e-10	4.65661e-10	C1orf174
1	3812707	G	3	C	32	AF=0.5	0/0/1/1	0|1	4	4.17698e-07	4.17698e-07	C1orf174
1	3812710	T	3	C	32	AF=0.5	0/0/1/1	0|1	4	4.17698e-07	4.17698e-07	C1orf174
1	3814883	C	0	G	11	AF=0.5	0/0/1/1	0|1	4	0.000976562	0.000976562	C1orf174
1	3814994	C	0	T	11	AF=0.5	0/0/1/1	0|1	4	0.000976562	0.000976562	C1orf174
1	3817971	C	0	T	10	AF=0.5	0/0/1/1	1|0	4	0.00195312	0.00195312	LOC100133612
1	3828448	G	0	A	18	AF=0.5	0/0/1/1	1|0	4	7.62939e-06	7.62939e-06	LOC100133612
1	4064104	C	0	T	10	AF=0.5	0/0/1/1	1|0	4	0.00195312	0.00195312	None
1	4070982	G	52	A	18	AF=0.5	0/0/1/1	0|1	4	5.84955e-05	5.84955e-05	None
1	4071052	C	66	T	30	AF=0.5	0/0/1/1	0|1	4	0.000305597	0.000305597	None
1	4071164	G	23	A	10	AF=0.5	0/0/1/1	0|1	4	0.035082	0.035082	None
1	4071399	A	96	G	23	AF=0.5	0/0/1/1	0|1	4	8.53534e-12	8.53534e-12	None
1	4072329	T	20	C	38	AF=0.5	0/0/1/1	0|1	4	0.024746	0.024746	None
1	4093263	A	0	G	13	AF=0.5	0/0/1/1	0|1	4	0.000244141	0.000244141	None
1	5307317	T	0	C	27	AF=0.5	0/0/1/1	0|1	4	1.49012e-08	1.49012e-08	None
1	5307519	G	0	C	27	AF=0.5	0/0/1/1	0|1	4	1.49012e-08	1.49012e-08	None
1	5913621	T	0	C	11	AF=0.5	0/0/1/1	1|0	4	0.000976562	0.000976562	None
1	5923788	T	31	G	10	AF=0.5	0/0/1/1	1|0	4	0.00145049	0.00145049	NPHP4
1	5926507	T	85	C	24	AF=0.5	0/0/1/1	1|0	4	3.50483e-09	3.50483e-09	NPHP4
1	5930955	A	0	G	21	AF=0.5	0/0/1/1	1|0	4	9.53674e-07	9.53674e-07	NPHP4
1	5930977	G	0	A	14	AF=0.5	0/0/1/1	1|0	4	0.00012207	0.00012207	NPHP4
1	5933384	C	6	G	48	AF=0.5	0/0/1/1	0|1	4	3.25653e-09	3.25653e-09	NPHP4
1	5934490	A	4	G	14	AF=0.5	0/0/1/1	1|0	4	0.0308838	0.0308838	NPHP4
1	5937413	A	0	C	12	AF=0.5	0/0/1/1	0|1	4	0.000488281	0.000488281	NPHP4
1	5965381	C	74	T	50	AF=0.5	0/0/1/1	1|0	4	0.0384485	0.0384485	NPHP4
1	6051266	C	3	G	17	AF=0.5	0/0/1/1	1|0	4	0.00257683	0.00257683	NPHP4
1	6053630	T	0	G	16	AF=0.5	0/0/1/1	1|0	4	3.05176e-05	3.05176e-05	KCNAB2
1	6053655	A	0	G	17	AF=0.5	0/0/1/1	1|0	4	1.52588e-05	1.52588e-05	KCNAB2
1	6060238	C	0	T	12	AF=0.5	0/0/1/1	1|0	4	0.000488281	0.000488281	KCNAB2
1	6062797	G	0	A	19	AF=0.5	0/0/1/1	1|0	4	3.8147e-06	3.8147e-06	KCNAB2
1	6078835	T	19	C	84	AF=0.5	0/0/1/1	1|0	4	6.20763e-11	6.20763e-11	KCNAB2
1	6157221	C	0	T	11	AF=0.5	0/0/1/1	0|1	4	0.000976562	0.000976562	KCNAB2
1	6160870	G	33	A	14	AF=0.5	0/0/1/1	0|1	4	0.00794273	0.00794273	KCNAB2
1	6196598	A	0	G	24	AF=0.25	0/0/0/1	0/1	4	1.19209e-07	3.55271e-15	CHD5
1	6258794	A	358	G	206	AF=0.5	0/0/1/1	1|0	4	1.59206e-10	1.59206e-10	RPL22
1	6259025	C	36	T	75	AF=0.5	0/0/1/1	1|0	4	0.000271818	0.000271818	RPL22
1	6259130	A	128	G	68	AF=0.5	0/0/1/1	1|0	4	2.18256e-05	2.18256e-05	RPL22
1	6260663	A	2	C	207	AF=0.5	0/0/1/1	1|0	4	5.33478e-59	5.33478e-59	None
1	6261871	G	0	A	20	AF=0.5	0/0/1/1	1|0	4	1.90735e-06	1.90735e-06	None
1	6263354	C	0	T	11	AF=0.5	0/0/1/1	1|0	4	0.000976562	0.000976562	None
1	6264775	T	0	C	14	AF=0.5	0/0/1/1	1|0	4	0.00012207	0.00012207	None
1	6265368	A	9	G	133	AF=0.5	0/0/1/1	1|0	4	1.91942e-29	1.91942e-29	None
1	6266096	A	2	G	57	AF=0.5	0/0/1/1	1|0	4	6.14439e-15	6.14439e-15	None
1	6272137	A	15	G	5	AF=0.5	0/0/1/1	1|0	4	0.0413895	0.0413895	RNF207
1	6278414	A	63	G	39	AF=0.5	0/0/1/1	1|0	4	0.0222977	0.0222977	RNF207
1	6279370	G	63	C	38	AF=0.5	0/0/1/1	1|0	4	0.0165059	0.0165059	RNF207
1	6609559	C	0	A	23	AF=0.75	0/1/1/1	0|1	4	2.38419e-07	0.00258097	NOL9
1	6614230	G	157	A	85	AF=0.25	0/0/0/1	1|0	4	4.30197e-06	0.000457672	NOL9
1	6614535	G	159	A	287	AF=0.5	0/0/1/1	0|1	4	1.40993e-09	1.40993e-09	NOL9
1	6614653	C	0	G	50	AF=0.5	0/0/1/1	0|1	4	1.77636e-15	1.77636e-15	NOL9
1	6644723	G	35	A	10	AF=0.5	0/0/1/1	0|1	4	0.000247088	0.000247088	ZBTB48
1	6645867	G	0	A	22	AF=0.5	0/0/1/1	0|1	4	4.76837e-07	4.76837e-07	ZBTB48
1	6659505	G	147	A	98	AF=0.5	0/0/1/1	0|1	4	0.00210153	0.00210153	KLHL21
1	6683240	G	99	A	52	AF=0.5	0/0/1/1	0|1	4	0.000162429	0.000162429	PHF13
1	6694207	A	0	G	27	AF=0.5	0/0/1/1	0|1	4	1.49012e-08	1.49012e-08	THAP3
1	6694980	G	387	A	273	AF=0.5	0/0/1/1	0|1	4	1.03936e-05	1.03936e-05	DNAJC11, THAP3
1	6695123	C	396	T	267	AF=0.5	0/0/1/1	0|1	4	6.16016e-07	6.16016e-07	DNAJC11, THAP3
1	6695244	A	291	G	217	AF=0.5	0/0/1/1	0|1	4	0.00117892	0.00117892	DNAJC11, THAP3
1	6705874	G	314	C	163	AF=0.5	0/0/1/1	1|0	4	4.34417e-12	4.34417e-12	DNAJC11
1	6711146	T	19	C	35	AF=0.5	0/0/1/1	0|1	4	0.0402236	0.0402236	DNAJC11
1	6732568	G	1	T	13	AF=0.5	0/0/1/1	0|1	4	0.00183105	0.00183105	DNAJC11
1	6759816	A	0	T	16	AF=0.5	0/0/1/1	0|1	4	3.05176e-05	3.05176e-05	DNAJC11
1	6761261	A	26	G	12	AF=0.5	0/0/1/1	0|1	4	0.0335524	0.0335524	DNAJC11
1	6936272	G	0	A	15	AF=0.5	0/0/1/1	1|0	4	6.10352e-05	6.10352e-05	CAMTA1
1	6948204	T	35	C	10	AF=0.5	0/0/1/1	1|0	4	0.000247088	0.000247088	CAMTA1
1	7873503	A	0	G	10	AF=0.5	0/0/1/1	0|1	4	0.00195312	0.00195312	PER3
1	8021778	T	855	C	724	AF=0.5	0/0/1/1	0|1	4	0.0010633	0.0010633	PARK7
1	8033468	G	0	A	26	AF=0.5	0/0/1/1	0|1	4	2.98023e-08	2.98023e-08	PARK7
1	8063528	G	0	A	13	AF=0.5	0/0/1/1	0|1	4	0.000244141	0.000244141	None
1	8069022	A	0	G	20	AF=0.5	0/0/1/1	0|1	4	1.90735e-06	1.90735e-06	None
1	8413317	A	80	C	47	AF=0.5	0/0/1/1	1|0	4	0.00433082	0.00433082	RERE
1	8413839	A	79	G	52	AF=0.5	0/0/1/1	1|0	4	0.0227433	0.0227433	RERE
1	8421495	C	89	T	41	AF=0.5	0/0/1/1	0|1	4	3.09219e-05	3.09219e-05	RERE
1	8490603	T	0	C	11	AF=0.5	0/0/1/1	0|1	4	0.000976562	0.000976562	RERE
1	8794667	T	0	C	10	AF=0.5	0/0/1/1	1|0	4	0.00195312	0.00195312	RERE
1	8834706	C	0	T	11	AF=0.5	0/0/1/1	1|0	4	0.000976562	0.000976562	RERE
1	8856603	A	3	G	16	AF=0.5	0/0/1/1	0|1	4	0.00442505	0.00442505	RERE
1	8865639	C	0	T	10	AF=0.5	0/0/1/1	0|1	4	0.00195312	0.00195312	RERE
1	8926752	T	2	C	13	AF=0.5	0/0/1/1	0|1	4	0.00738525	0.00738525	ENO1
1	8931149	C	94	T	47	AF=0.75	0/1/1/1	0|1	4	9.33449e-05	2.7623e-25	ENO1
1	8933242	G	8	A	30	AF=0.5	0/0/1/1	0|1	4	0.000471987	0.000471987	ENO1
1	8935149	A	33	G	54	AF=0.5	0/0/1/1	0|1	4	0.0314181	0.0314181	ENO1
1	8937226	T	23	C	5	AF=0.5	0/0/1/1	0|1	4	0.000912234	0.000912234	ENO1
1	8938057	T	39	C	21	AF=0.5	0/0/1/1	0|1	4	0.0273401	0.0273401	ENO1
1	9330740	G	10	C	25	AF=0.5	0/0/1/1	1|0	4	0.0166738	0.0166738	H6PD
1	9416151	G	1	A	16	AF=0.5	0/0/1/1	0|1	4	0.000274658	0.000274658	SPSB1
1	9651742	G	0	C	14	AF=0.5	0/0/1/1	1|0	4	0.00012207	0.00012207	TMEM201
1	9741193	A	238	G	323	AF=0.5	0/0/1/1	1|0	4	0.000381398	0.000381398	BC038541, PIK3CD
1	9799496	G	22	C	8	AF=0.5	0/0/1/1	0|1	4	0.0161248	0.0161248	CLSTN1
1	10522190	C	38	T	11	AF=0.5	0/0/1/1	1|0	4	0.000141971	0.000141971	DFFA
1	10529326	A	275	G	355	AF=0.5	0/0/1/1	1|0	4	0.00162621	0.00162621	DFFA
1	10567058	C	28	T	12	AF=0.5	0/0/1/1	0|1	4	0.016589	0.016589	PEX14
1	10567122	G	0	A	11	AF=0.5	0/0/1/1	0|1	4	0.000976562	0.000976562	PEX14
1	10579808	T	0	C	11	AF=0.5	0/0/1/1	1|0	4	0.000976562	0.000976562	PEX14
1	10584672	G	2	A	20	AF=0.5	0/0/1/1	0|1	4	0.000121117	0.000121117	PEX14
1	10584738	A	0	T	20	AF=0.5	0/0/1/1	0|1	4	1.90735e-06	1.90735e-06	PEX14
1	10601761	G	37	A	11	AF=0.5	0/0/1/1	1|0	4	0.000222245	0.000222245	PEX14
1	10613167	G	1	A	11	AF=0.5	0/0/1/1	0|1	4	0.00634766	0.00634766	PEX14
1	10613344	T	0	G	12	AF=0.5	0/0/1/1	1|0	4	0.000488281	0.000488281	PEX14
1	10614233	C	0	T	13	AF=0.75	0/1/1/1	1|0	4	0.000244141	0.0480474	PEX14
1	10627619	C	2	T	24	AF=0.5	0/0/1/1	0|1	4	1.04904e-05	1.04904e-05	PEX14
1	10633273	G	0	A	14	AF=0.5	0/0/1/1	0|1	4	0.00012207	0.00012207	PEX14
1	10633421	A	11	C	26	AF=0.5	0/0/1/1	0|1	4	0.0200739	0.0200739	PEX14
1	10636955	A	0	T	22	AF=0.5	0/0/1/1	0|1	4	4.76837e-07	4.76837e-07	PEX14
1	10683683	G	0	T	11	AF=0.5	0/0/1/1	1|0	4	0.000976562	0.000976562	PEX14
1	11669774	A	5	G	45	AF=0.5	0/0/1/1	0|1	4	4.20985e-09	4.20985e-09	None
1	11801023	T	27	C	8	AF=0.5	0/0/1/1	0|1	4	0.00187823	0.00187823	AGTRAP
1	11802951	C	36	G	15	AF=0.5	0/0/1/1	1|0	4	0.00460131	0.00460131	AGTRAP
1	11813389	A	0	G	15	AF=0.5	0/0/1/1	1|0	4	6.10352e-05	6.10352e-05	None
1	11846252	G	89	A	140	AF=0.5	0/0/1/1	1|0	4	0.000912423	0.000912423	C1orf167, MTHFR
1	11847759	C	193	T	70	AF=0.5	0/0/1/1	1|0	4	1.7615e-14	1.7615e-14	C1orf167, MTHFR
1	11850365	T	317	G	206	AF=0.5	0/0/1/1	1|0	4	1.38462e-06	1.38462e-06	MTHFR
1	11851003	G	23	C	67	AF=0.5	0/0/1/1	0|1	4	3.79505e-06	3.79505e-06	MTHFR
1	11854476	T	170	G	272	AF=0.5	0/0/1/1	0|1	4	1.40379e-06	1.40379e-06	MTHFR
1	11857525	A	15	T	4	AF=0.5	0/0/1/1	1|0	4	0.0192108	0.0192108	MTHFR
1	11862214	T	4	C	12	AF=0.25	0/0/0/1	1|0	4	0.0768127	3.81072e-05	MTHFR
1	11883629	T	3	A	14	AF=0.5	0/0/1/1	0|1	4	0.0127258	0.0127258	CLCN6
1	11981518	G	20	A	43	AF=0.5	0/0/1/1	1|0	4	0.0051524	0.0051524	KIAA2013
1	12082461	C	401	T	187	AF=0.5	0/0/1/1	1|0	4	6.47394e-19	6.47394e-19	MIIP
1	12084058	T	0	C	30	AF=0.5	0/0/1/1	1|0	4	1.86265e-09	1.86265e-09	MIIP
1	12084065	G	0	A	30	AF=0.5	0/0/1/1	1|0	4	1.86265e-09	1.86265e-09	MIIP
1	12124259	A	4	G	9	AF=0.25	0/0/0/1	1|0	4	0.266846	0.000989124	TNFRSF8
1	12126854	T	1	C	9	AF=0.5	0/0/1/1	1|0	4	0.0214844	0.0214844	TNFRSF8
1	12138629	A	0	G	12	AF=0.5	0/0/1/1	1|0	4	0.000488281	0.000488281	TNFRSF8
1	12138687	A	0	G	12	AF=0.5	0/0/1/1	1|0	4	0.000488281	0.000488281	TNFRSF8
1	12160946	G	0	A	10	AF=0.5	0/0/1/1	0|1	4	0.00195312	0.00195312	TNFRSF8
1	12164437	C	44	T	91	AF=0.5	0/0/1/1	0|1	4	6.42838e-05	6.42838e-05	TNFRSF8
1	12611231	T	0	G	29	AF=0.5	0/0/1/1	0|1	4	3.72529e-09	3.72529e-09	None
1	12612280	G	2	A	10	AF=0.5	0/0/1/1	0|1	4	0.0385742	0.0385742	None
1	12612385	T	1	C	11	AF=0.5	0/0/1/1	0|1	4	0.00634766	0.00634766	None
1	12637160	G	0	A	25	AF=0.5	0/0/1/1	0|1	4	5.96046e-08	5.96046e-08	DHRS3
1	12640127	G	9	A	26	AF=0.5	0/0/1/1	0|1	4	0.00598812	0.00598812	DHRS3
1	12640650	C	113	T	386	AF=0.5	0/0/1/1	0|1	4	6.27463e-36	6.27463e-36	DHRS3
1	12657633	C	0	G	15	AF=0.5	0/0/1/1	0|1	4	6.10352e-05	6.10352e-05	DHRS3
1	12664766	A	0	G	72	AF=0.5	0/0/1/1	0|1	4	4.23516e-22	4.23516e-22	DHRS3
1	12665063	C	6	T	21	AF=0.5	0/0/1/1	0|1	4	0.00592461	0.00592461	DHRS3
1	12669753	C	16	T	5	AF=0.5	0/0/1/1	0|1	4	0.0266037	0.0266037	DHRS3
1	12670396	C	4	T	14	AF=0.5	0/0/1/1	0|1	4	0.0308838	0.0308838	DHRS3
1	12671229	T	3	C	19	AF=0.5	0/0/1/1	0|1	4	0.000855446	0.000855446	DHRS3
1	12671324	A	4	C	40	AF=0.5	0/0/1/1	0|1	4	1.70514e-08	1.70514e-08	DHRS3
1	12672149	C	0	T	33	AF=0.5	0/0/1/1	0|1	4	2.32831e-10	2.32831e-10	DHRS3
1	12672835	A	6	G	24	AF=0.5	0/0/1/1	0|1	4	0.00143091	0.00143091	DHRS3
1	12676205	C	21	T	52	AF=0.5	0/0/1/1	0|1	4	0.00037134	0.00037134	DHRS3
1	14717066	T	14	C	3	AF=0.5	0/0/1/1	0|1	4	0.0127258	0.0127258	None
1	15035663	G	0	T	11	AF=0.5	0/0/1/1	1|0	4	0.000976562	0.000976562	KAZN
1	15090012	T	12	C	3	AF=0.5	0/0/1/1	1|0	4	0.0351562	0.0351562	KAZN
1	15095806	T	330	A	214	AF=0.5	0/0/1/1	1|0	4	7.47946e-07	7.47946e-07	KAZN
1	15335548	C	0	T	11	AF=0.5	0/0/1/1	1|0	4	0.000976562	0.000976562	KAZN
1	15653563	C	0	T	20	AF=0.5	0/0/1/1	0|1	4	1.90735e-06	1.90735e-06	AK055853, FHAD1
1	15704689	G	0	A	16	AF=0.5	0/0/1/1	0|1	4	3.05176e-05	3.05176e-05	FHAD1
1	15711126	C	0	G	11	AF=0.5	0/0/1/1	0|1	4	0.000976562	0.000976562	FHAD1
1	15739233	G	0	A	17	AF=0.5	0/0/1/1	0|1	4	1.52588e-05	1.52588e-05	EFHD2
1	15739263	C	6	G	17	AF=0.5	0/0/1/1	0|1	4	0.0346897	0.0346897	EFHD2
1	15743884	A	0	C	18	AF=0.5	0/0/1/1	0|1	4	7.62939e-06	7.62939e-06	EFHD2
1	15744011	C	0	G	17	AF=0.5	0/0/1/1	0|1	4	1.52588e-05	1.52588e-05	EFHD2
1	15755676	G	47	A	139	AF=0.5	0/0/1/1	0|1	4	9.40036e-12	9.40036e-12	EFHD2
1	15755957	C	270	T	343	AF=0.5	0/0/1/1	0|1	4	0.00360257	0.00360257	EFHD2
1	15820607	A	0	G	15	AF=0.5	0/0/1/1	1|0	4	6.10352e-05	6.10352e-05	CASP9
1	15820618	A	0	G	14	AF=0.5	0/0/1/1	1|0	4	0.00012207	0.00012207	CASP9
1	15832543	T	28	C	125	AF=0.5	0/0/1/1	1|0	4	7.845e-16	7.845e-16	CASP9
1	15833908	C	0	T	26	AF=0.5	0/0/1/1	1|0	4	2.98023e-08	2.98023e-08	CASP9
1	15844615	A	108	G	168	AF=0.5	0/0/1/1	1|0	4	0.000365185	0.000365185	CASP9
1	15847913	T	0	G	15	AF=0.5	0/0/1/1	1|0	4	6.10352e-05	6.10352e-05	CASP9
1	15850613	G	25	A	102	AF=0.5	0/0/1/1	1|0	4	3.12067e-12	3.12067e-12	CASP9
1	15854882	T	0	G	18	AF=0.5	0/0/1/1	1|0	4	7.62939e-06	7.62939e-06	DNAJC16
1	15857716	G	0	A	18	AF=0.5	0/0/1/1	1|0	4	7.62939e-06	7.62939e-06	DNAJC16
1	15858557	T	0	C	21	AF=0.5	0/0/1/1	1|0	4	9.53674e-07	9.53674e-07	DNAJC16
1	15894959	T	76	C	41	AF=0.5	0/0/1/1	1|0	4	0.0015572	0.0015572	DNAJC16
1	15897020	C	36	T	56	AF=0.5	0/0/1/1	1|0	4	0.0470116	0.0470116	DNAJC16
1	16160550	A	1	C	14	AF=0.5	0/0/1/1	0|1	4	0.000976562	0.000976562	None
1	16173814	G	0	C	11	AF=0.5	0/0/1/1	1|0	4	0.000976562	0.000976562	FLJ37453
1	16256007	T	13	C	79	AF=0.5	0/0/1/1	0|1	4	1.07337e-12	1.07337e-12	SPEN
1	16344083	T	0	C	16	AF=0.5	0/0/1/1	1|0	4	3.05176e-05	3.05176e-05	HSPB7
1	16356870	G	0	A	15	AF=0.5	0/0/1/1	0|1	4	6.10352e-05	6.10352e-05	CLCNKA, CLCNKB
1	16533022	C	0	T	16	AF=0.5	0/0/1/1	0|1	4	3.05176e-05	3.05176e-05	ARHGEF19
1	16556623	C	22	T	7	AF=0.5	0/0/1/1	1|0	4	0.00813006	0.00813006	None
1	16563635	A	4	G	44	AF=0.5	0/0/1/1	1|0	4	1.51383e-09	1.51383e-09	RSG1
1	16658845	G	0	C	14	AF=0.5	0/0/1/1	1|0	4	0.00012207	0.00012207	FBXO42
1	16723084	G	441	A	380	AF=0.5	0/0/1/1	1|0	4	0.0361946	0.0361946	AL832937, SPATA21, SZRD1
1	16780060	C	0	T	33	AF=0.5	0/0/1/1	1|0	4	2.32831e-10	2.32831e-10	NECAP2
1	16781446	A	0	G	10	AF=0.5	0/0/1/1	0|1	4	0.00195312	0.00195312	NECAP2
1	16930034	C	20	G	5	AF=0.75	0/1/1/1	0/1	4	0.00407732	1.24346e-08	NBPF1
1	16931735	G	1	A	19	AF=0.5	0/0/1/1	0/1	4	4.00543e-05	4.00543e-05	NBPF1
1	16931883	C	1	G	11	AF=0.5	0/0/1/1	0/1	4	0.00634766	0.00634766	NBPF1
1	16931948	G	12	A	32	AF=0.5	0/0/1/1	0/1	4	0.00365777	0.00365777	NBPF1
1	16932051	T	52	A	34	AF=0.25	0/0/0/1	1|0	4	0.0661526	0.00380149	NBPF1
1	16932144	A	73	C	74	AF=0.25	0/0/0/1	1|0	4	1	4.502e-11	NBPF1
1	16941974	A	0	G	18	AF=0.75	0/1/1/1	0/1	4	7.62939e-06	0.0110595	None
1	16944007	T	0	C	12	AF=0.25	0/0/0/1	1|0	4	0.000488281	5.96046e-08	None
1	16944945	G	346	A	153	AF=0.25	0/0/0/1	0/1	4	3.15497e-18	0.00440711	CROCCP2
1	16952267	T	74	C	11	AF=0.25	0/0/0/1	0/1	4	1.28883e-12	0.0083123	CROCCP2
1	16959551	T	15	C	5	AF=0.5	0/0/1/1	0/1	4	0.0413895	0.0413895	CROCCP2, FLJ00313
1	16959602	C	240	T	151	AF=0.5	0/0/1/1	0/1	4	7.87614e-06	7.87614e-06	CROCCP2, FLJ00313
1	16962875	A	20	G	31	AF=0.25	0/0/0/1	0/1	4	0.16078	6.70038e-08	CROCCP2, FLJ00313
1	16963438	A	0	G	12	AF=0.25	0/0/0/1	0/1	4	0.000488281	5.96046e-08	CROCCP2, FLJ00313
1	17346620	G	7	C	19	AF=0.5	0/0/1/1	0|1	4	0.0289593	0.0289593	SDHB
1	17738167	T	4	C	20	AF=0.5	0/0/1/1	0|1	4	0.00154388	0.00154388	RCC2
1	18720923	T	3	C	19	AF=0.5	0/0/1/1	1|0	4	0.000855446	0.000855446	None
1	19224797	C	0	A	20	AF=0.25	0/0/0/1	0/1	4	1.90735e-06	9.09495e-13	ALDH4A1
1	19654410	A	32	G	66	AF=0.5	0/0/1/1	1|0	4	0.000769883	0.000769883	PQLC2
1	19932633	G	47	T	25	AF=0.5	0/0/1/1	0|1	4	0.0127746	0.0127746	MINOS1, MINOS1-NBL1
1	20211558	C	22	G	9	AF=0.5	0/0/1/1	1|0	4	0.0294494	0.0294494	OTUD3
1	20211608	C	22	T	9	AF=0.5	0/0/1/1	1|0	4	0.0294494	0.0294494	OTUD3
1	20236731	A	113	G	81	AF=0.5	0/0/1/1	0|1	4	0.0257819	0.0257819	OTUD3
1	20238466	A	28	G	108	AF=0.5	0/0/1/1	0|1	4	2.78496e-12	2.78496e-12	OTUD3
1	20826485	C	54	G	159	AF=0.5	0/0/1/1	1|0	4	3.37853e-13	3.37853e-13	MUL1
1	20960230	C	9	T	41	AF=0.5	0/0/1/1	1|0	4	5.6141e-06	5.6141e-06	PINK1
1	20965942	G	3	A	48	AF=0.5	0/0/1/1	1|0	4	1.96749e-11	1.96749e-11	PINK1
1	20976589	C	20	T	36	AF=0.5	0/0/1/1	1|0	4	0.0440465	0.0440465	PINK1
1	20976759	C	0	T	16	AF=0.5	0/0/1/1	1|0	4	3.05176e-05	3.05176e-05	PINK1
1	20977221	A	32	T	95	AF=0.5	0/0/1/1	1|0	4	1.93561e-08	1.93561e-08	PINK1
1	20977365	C	44	G	68	AF=0.5	0/0/1/1	1|0	4	0.0293022	0.0293022	PINK1
1	20977449	G	24	T	52	AF=0.5	0/0/1/1	1|0	4	0.00176187	0.00176187	PINK1
1	20977599	C	43	G	84	AF=0.5	0/0/1/1	1|0	4	0.000346959	0.000346959	PINK1
1	21066634	G	0	C	11	AF=0.5	0/0/1/1	1|0	4	0.000976562	0.000976562	None
1	21067051	C	54	T	16	AF=0.5	0/0/1/1	1|0	4	5.85396e-06	5.85396e-06	None
1	21070238	T	663	C	906	AF=0.5	0/0/1/1	0|1	4	9.27773e-10	9.27773e-10	HP1BP3
1	21071419	G	498	A	392	AF=0.5	0/0/1/1	0|1	4	0.00042608	0.00042608	HP1BP3
1	21076274	G	599	A	861	AF=0.5	0/0/1/1	0|1	4	7.45283e-12	7.45283e-12	HP1BP3
1	21080938	T	20	A	81	AF=0.5	0/0/1/1	0|1	4	6.93093e-10	6.93093e-10	HP1BP3
1	21081930	T	103	C	31	AF=0.5	0/0/1/1	1|0	4	3.17954e-10	3.17954e-10	HP1BP3
1	21082074	A	134	C	33	AF=0.5	0/0/1/1	1|0	4	1.22482e-15	1.22482e-15	HP1BP3
1	21082823	T	4	A	36	AF=0.5	0/0/1/1	0|1	4	1.85702e-07	1.85702e-07	HP1BP3
1	21089999	A	8	C	51	AF=0.5	0/0/1/1	0|1	4	9.05239e-09	9.05239e-09	HP1BP3
1	21098639	C	0	T	17	AF=0.5	0/0/1/1	0|1	4	1.52588e-05	1.52588e-05	HP1BP3
1	21105142	G	0	A	11	AF=0.5	0/0/1/1	0|1	4	0.000976562	0.000976562	HP1BP3
1	21247944	T	0	C	16	AF=0.5	0/0/1/1	1|0	4	3.05176e-05	3.05176e-05	EIF4G3
1	21292173	A	0	G	17	AF=0.5	0/0/1/1	0/1	4	1.52588e-05	1.52588e-05	EIF4G3
1	21446883	A	0	G	11	AF=0.5	0/0/1/1	1|0	4	0.000976562	0.000976562	EIF4G3
1	21458217	G	0	A	24	AF=0.5	0/0/1/1	1|0	4	1.19209e-07	1.19209e-07	EIF4G3
1	21465930	A	1	C	15	AF=0.5	0/0/1/1	0|1	4	0.000518799	0.000518799	EIF4G3
1	21544074	G	0	C	22	AF=0.5	0/0/1/1	0|1	4	4.76837e-07	4.76837e-07	ECE1
1	21544505	G	50	A	17	AF=0.5	0/0/1/1	0|1	4	6.73797e-05	6.73797e-05	ECE1
1	21544601	C	7	T	37	AF=0.5	0/0/1/1	0|1	4	5.29958e-06	5.29958e-06	ECE1
1	21545733	G	46	C	26	AF=0.5	0/0/1/1	0|1	4	0.0244609	0.0244609	ECE1
1	21546356	G	29	T	67	AF=0.5	0/0/1/1	0|1	4	0.000132222	0.000132222	ECE1
1	21551457	A	1	G	12	AF=0.5	0/0/1/1	0|1	4	0.00341797	0.00341797	ECE1
1	21559702	C	17	A	4	AF=0.5	0/0/1/1	0|1	4	0.00719738	0.00719738	ECE1
1	21562918	C	0	G	10	AF=0.5	0/0/1/1	0|1	4	0.00195312	0.00195312	ECE1
1	21573855	G	9	A	67	AF=0.5	0/0/1/1	0|1	4	4.33435e-12	4.33435e-12	ECE1
1	21669790	G	0	A	10	AF=0.5	0/0/1/1	1|0	4	0.00195312	0.00195312	ECE1
1	21671943	T	26	G	31	AF=0.75	0/1/1/1	1|0	4	0.596642	0.000672807	ECE1
1	21932625	G	123	A	70	AF=0.5	0/0/1/1	1|0	4	0.000166789	0.000166789	RAP1GAP
1	21933345	G	4	A	16	AF=0.5	0/0/1/1	0|1	4	0.0118179	0.0118179	RAP1GAP
1	21942379	G	0	C	27	AF=0.5	0/0/1/1	0|1	4	1.49012e-08	1.49012e-08	RAP1GAP
1	21943820	G	119	A	75	AF=0.5	0/0/1/1	1|0	4	0.00194348	0.00194348	RAP1GAP
1	21993041	C	0	T	14	AF=0.5	0/0/1/1	1|0	4	0.00012207	0.00012207	RAP1GAP
1	22018935	G	0	C	46	AF=0.5	0/0/1/1	0|1	4	2.84217e-14	2.84217e-14	USP48
1	22038094	G	6	A	10	AF=0.25	0/0/0/1	1|0	4	0.454498	0.00164447	USP48
1	22048651	G	25	T	7	AF=0.5	0/0/1/1	0|1	4	0.0021024	0.0021024	USP48
1	22048664	C	4	T	48	AF=0.5	0/0/1/1	1|0	4	1.30653e-10	1.30653e-10	USP48
1	22049937	G	3	T	15	AF=0.5	0/0/1/1	1|0	4	0.00753784	0.00753784	USP48
1	22050466	A	271	T	480	AF=0.5	0/0/1/1	0|1	4	2.18787e-14	2.18787e-14	USP48
1	22051873	G	68	A	38	AF=0.5	0/0/1/1	1|0	4	0.00461854	0.00461854	USP48
1	22052231	A	54	G	70	AF=0.75	0/1/1/1	0|1	4	0.177732	6.34282e-06	USP48
1	22054427	C	46	A	129	AF=0.5	0/0/1/1	1|0	4	2.63314e-10	2.63314e-10	USP48
1	22072324	T	0	C	43	AF=0.5	0/0/1/1	0|1	4	2.27374e-13	2.27374e-13	USP48
1	22080775	A	14	G	3	AF=0.5	0/0/1/1	0|1	4	0.0127258	0.0127258	USP48
1	22082350	A	27	C	10	AF=0.5	0/0/1/1	0|1	4	0.00763208	0.00763208	USP48
1	22090028	T	1	C	10	AF=0.5	0/0/1/1	0|1	4	0.0117188	0.0117188	USP48
1	22090125	A	1	G	10	AF=0.5	0/0/1/1	0|1	4	0.0117188	0.0117188	USP48
1	22092514	A	2	G	10	AF=0.5	0/0/1/1	0|1	4	0.0385742	0.0385742	USP48
1	22093169	T	0	C	12	AF=0.5	0/0/1/1	0|1	4	0.000488281	0.000488281	USP48
1	22102328	G	2	C	10	AF=0.5	0/0/1/1	1|0	4	0.0385742	0.0385742	USP48
1	22103564	C	4	T	14	AF=0.5	0/0/1/1	1|0	4	0.0308838	0.0308838	USP48
1	22105568	C	0	T	11	AF=0.5	0/0/1/1	1|0	4	0.000976562	0.000976562	USP48
1	22105918	T	0	A	10	AF=0.5	0/0/1/1	0|1	4	0.00195312	0.00195312	USP48
1	22109370	G	448	A	668	AF=0.5	0/0/1/1	1|0	4	4.8187e-11	4.8187e-11	USP48
1	22149935	T	53	C	161	AF=0.5	0/0/1/1	0|1	4	7.46514e-14	7.46514e-14	HSPG2, LDLRAD2
1	22157689	G	1	A	12	AF=0.5	0/0/1/1	0|1	4	0.00341797	0.00341797	HSPG2
1	22160020	C	47	T	100	AF=0.5	0/0/1/1	0|1	4	1.46943e-05	1.46943e-05	HSPG2
1	22201438	C	57	T	122	AF=0.5	0/0/1/1	0|1	4	1.33328e-06	1.33328e-06	HSPG2
1	22214046	C	50	T	26	AF=0.5	0/0/1/1	0|1	4	0.00790518	0.00790518	HSPG2
1	22214127	A	97	G	67	AF=0.5	0/0/1/1	1|0	4	0.023249	0.023249	HSPG2
1	22239774	T	6	C	20	AF=0.5	0/0/1/1	0|1	4	0.00935531	0.00935531	HSPG2
1	22244923	A	0	G	15	AF=0.5	0/0/1/1	1|0	4	6.10352e-05	6.10352e-05	HSPG2
1	22250029	C	1	G	12	AF=0.5	0/0/1/1	1|0	4	0.00341797	0.00341797	HSPG2
1	22251260	C	54	T	15	AF=0.5	0/0/1/1	1|0	4	2.61285e-06	2.61285e-06	HSPG2
1	22251891	C	21	T	5	AF=0.5	0/0/1/1	1|0	4	0.00249392	0.00249392	HSPG2
1	22253062	C	1	A	15	AF=0.5	0/0/1/1	0|1	4	0.000518799	0.000518799	HSPG2
1	22352108	C	125	T	30	AF=0.5	0/0/1/1	1|0	4	5.49074e-15	5.49074e-15	LINC00339
1	22353491	C	0	T	14	AF=0.5	0/0/1/1	1|0	4	0.00012207	0.00012207	LINC00339
1	22354246	A	0	T	13	AF=0.5	0/0/1/1	1|0	4	0.000244141	0.000244141	LINC00339
1	22354274	G	0	C	26	AF=0.5	0/0/1/1	1|0	4	2.98023e-08	2.98023e-08	LINC00339
1	22354277	C	0	T	26	AF=0.5	0/0/1/1	1|0	4	2.98023e-08	2.98023e-08	LINC00339
1	22356098	T	2	C	16	AF=0.5	0/0/1/1	1|0	4	0.00131226	0.00131226	LINC00339
1	22356138	T	2	C	16	AF=0.5	0/0/1/1	1|0	4	0.00131226	0.00131226	LINC00339
1	22357217	G	83	T	142	AF=0.5	0/0/1/1	1|0	4	0.000101432	0.000101432	LINC00339
1	22357488	C	35	A	26	AF=0.75	0/1/1/1	0|1	4	0.305677	1.00148e-07	LINC00339
1	22390072	G	0	T	12	AF=0.5	0/0/1/1	1|0	4	0.000488281	0.000488281	CDC42
1	22415941	T	1	C	14	AF=0.5	0/0/1/1	1|0	4	0.000976562	0.000976562	CDC42
1	22439520	T	0	C	17	AF=0.5	0/0/1/1	1|0	4	1.52588e-05	1.52588e-05	None
1	23405400	C	6	A	18	AF=0.5	0/0/1/1	1|0	4	0.0226558	0.0226558	KDM1A
1	23410138	T	2	G	120	AF=0.75	0/1/1/1	0/1	4	2.82269e-33	9.71193e-13	KDM1A
1	23608688	G	2	A	12	AF=0.5	0/0/1/1	0|1	4	0.0129395	0.0129395	None
1	23835794	A	71	G	14	AF=0.5	0/0/1/1	1|0	4	2.42717e-10	2.42717e-10	E2F2
1	23884661	G	226	A	109	AF=0.5	0/0/1/1	1|0	4	1.53e-10	1.53e-10	ID3
1	24021737	C	119	T	79	AF=0.5	0/0/1/1	1|0	4	0.00544408	0.00544408	RPL11
1	24023720	G	3	A	28	AF=0.5	0/0/1/1	0|1	4	4.64916e-06	4.64916e-06	None
1	24062987	C	1	T	11	AF=0.5	0/0/1/1	1|0	4	0.00634766	0.00634766	None
1	24083649	T	1	C	9	AF=0.5	0/0/1/1	1|0	4	0.0214844	0.0214844	TCEB3
1	24114129	G	816	A	710	AF=0.5	0/0/1/1	1|0	4	0.00717075	0.00717075	PITHD1
1	24139436	G	0	C	25	AF=0.5	0/0/1/1	0|1	4	5.96046e-08	5.96046e-08	HMGCL
1	24150112	G	25	C	6	AF=0.5	0/0/1/1	0|1	4	0.00087791	0.00087791	HMGCL
1	24180962	T	76	C	40	AF=0.5	0/0/1/1	0|1	4	0.00106507	0.00106507	FUCA1
1	24706269	A	26	G	7	AF=0.5	0/0/1/1	0|1	4	0.00131873	0.00131873	STPG1
1	24745070	T	0	C	12	AF=0.5	0/0/1/1	0|1	4	0.000488281	0.000488281	NIPAL3
1	24745112	T	0	C	13	AF=0.5	0/0/1/1	0|1	4	0.000244141	0.000244141	NIPAL3
1	24752943	T	0	C	16	AF=0.5	0/0/1/1	0|1	4	3.05176e-05	3.05176e-05	NIPAL3
1	24753164	G	0	A	14	AF=0.5	0/0/1/1	0|1	4	0.00012207	0.00012207	NIPAL3
1	24753310	G	0	A	14	AF=0.5	0/0/1/1	0|1	4	0.00012207	0.00012207	NIPAL3
1	24778811	A	0	G	21	AF=0.5	0/0/1/1	0|1	4	9.53674e-07	9.53674e-07	NIPAL3
1	24785393	C	23	T	75	AF=0.5	0/0/1/1	0|1	4	1.31722e-07	1.31722e-07	NIPAL3
1	24798001	G	1	A	23	AF=0.5	0/0/1/1	0|1	4	2.98023e-06	2.98023e-06	NIPAL3
1	24798383	C	72	T	38	AF=0.5	0/0/1/1	0|1	4	0.00153305	0.00153305	NIPAL3
1	24837599	T	0	C	17	AF=0.5	0/0/1/1	0|1	4	1.52588e-05	1.52588e-05	RCAN3
1	24981825	G	0	T	10	AF=0.5	0/0/1/1	0|1	4	0.00195312	0.00195312	SRRM1
1	25169634	A	310	G	259	AF=0.75	0/1/1/1	1|0	4	0.03598	1.583e-50	CLIC4, Z24749
1	25561667	G	0	A	13	AF=0.5	0/0/1/1	1|0	4	0.000244141	0.000244141	None
1	25687308	C	449	G	646	AF=0.5	0/0/1/1	0|1	4	2.8739e-09	2.8739e-09	TMEM50A
1	25687901	T	161	C	230	AF=0.5	0/0/1/1	0|1	4	0.000566995	0.000566995	TMEM50A
1	25783066	A	0	G	27	AF=0.5	0/0/1/1	0|1	4	1.49012e-08	1.49012e-08	TMEM57
1	25783823	A	0	G	14	AF=0.5	0/0/1/1	0|1	4	0.00012207	0.00012207	TMEM57
1	25825781	G	1	A	9	AF=0.5	0/0/1/1	0|1	4	0.0214844	0.0214844	TMEM57
1	25826328	G	5	A	41	AF=0.5	0/0/1/1	0|1	4	4.40594e-08	4.40594e-08	TMEM57
1	25826502	A	15	G	48	AF=0.5	0/0/1/1	0|1	4	3.76061e-05	3.76061e-05	TMEM57
1	25877573	C	0	A	16	AF=0.5	0/0/1/1	1|0	4	3.05176e-05	3.05176e-05	LDLRAP1
1	25892298	G	2	T	22	AF=0.5	0/0/1/1	1|0	4	3.5882e-05	3.5882e-05	LDLRAP1
1	25892525	T	2	C	23	AF=0.5	0/0/1/1	1|0	4	1.94311e-05	1.94311e-05	LDLRAP1
1	25895238	C	38	T	59	AF=0.5	0/0/1/1	1|0	4	0.0417293	0.0417293	LDLRAP1
1	26286840	G	57	A	21	AF=0.5	0/0/1/1	1|0	4	5.57112e-05	5.57112e-05	PAFAH2
1	26435919	C	2	T	12	AF=0.5	0/0/1/1	1|0	4	0.0129395	0.0129395	None
1	26437262	A	0	C	20	AF=0.5	0/0/1/1	1|0	4	1.90735e-06	1.90735e-06	None
1	26448849	T	77	C	44	AF=0.5	0/0/1/1	1|0	4	0.00345094	0.00345094	PDIK1L
1	26449337	A	0	G	18	AF=0.5	0/0/1/1	1|0	4	7.62939e-06	7.62939e-06	PDIK1L
1	26449595	G	92	A	135	AF=0.5	0/0/1/1	1|0	4	0.00519557	0.00519557	PDIK1L
1	26450009	C	111	T	34	AF=0.5	0/0/1/1	1|0	4	9.88812e-11	9.88812e-11	PDIK1L
1	26496651	T	1872	C	2009	AF=0.5	0/0/1/1	1|0	4	0.0290179	0.0290179	ZNF593
1	26561856	T	0	C	23	AF=0.5	0/0/1/1	0|1	4	2.38419e-07	2.38419e-07	CEP85
1	26576247	T	0	G	10	AF=0.5	0/0/1/1	0|1	4	0.00195312	0.00195312	CEP85
1	26578233	G	3	A	16	AF=0.5	0/0/1/1	0|1	4	0.00442505	0.00442505	CEP85
1	26589698	T	0	A	20	AF=0.5	0/0/1/1	0|1	4	1.90735e-06	1.90735e-06	CEP85
1	26596080	G	143	A	344	AF=0.5	0/0/1/1	0|1	4	3.6787e-20	3.6787e-20	CEP85
1	26597189	G	0	A	29	AF=0.5	0/0/1/1	0|1	4	3.72529e-09	3.72529e-09	CEP85
1	26597673	G	40	A	84	AF=0.5	0/0/1/1	0|1	4	9.64781e-05	9.64781e-05	CEP85
1	26597781	C	32	T	60	AF=0.5	0/0/1/1	0|1	4	0.00460911	0.00460911	CEP85
1	26598281	T	38	C	51	AF=0.75	0/1/1/1	0|1	4	0.203117	0.000311474	CEP85
1	26599542	G	11	A	53	AF=0.5	0/0/1/1	0|1	4	1.00586e-07	1.00586e-07	CEP85
1	26602251	C	0	T	12	AF=0.25	0/0/0/1	1|0	4	0.000488281	5.96046e-08	CEP85
1	26605069	T	435	C	363	AF=0.5	0/0/1/1	0|1	4	0.0119109	0.0119109	CEP85
1	26607726	T	292	G	225	AF=0.5	0/0/1/1	0|1	4	0.00365881	0.00365881	SH3BGRL3
1	26609259	C	172	T	131	AF=0.5	0/0/1/1	1|0	4	0.0214108	0.0214108	UBXN11
1	26619649	C	0	T	21	AF=0.5	0/0/1/1	0|1	4	9.53674e-07	9.53674e-07	UBXN11
1	26627478	T	28	C	53	AF=0.5	0/0/1/1	1|0	4	0.0072755	0.0072755	UBXN11
1	26644399	C	6	T	20	AF=0.5	0/0/1/1	0|1	4	0.00935531	0.00935531	UBXN11
1	26646730	A	667	G	851	AF=0.5	0/0/1/1	1|0	4	2.57119e-06	2.57119e-06	CD52
1	26786627	G	73	A	144	AF=0.5	0/0/1/1	1|0	4	1.64424e-06	1.64424e-06	DHDDS
1	26789787	T	0	C	45	AF=0.5	0/0/1/1	1|0	4	5.68434e-14	5.68434e-14	AL050085, DHDDS
1	26789813	G	0	A	46	AF=0.5	0/0/1/1	1|0	4	2.84217e-14	2.84217e-14	AL050085, DHDDS
1	26804090	G	0	A	10	AF=0.5	0/0/1/1	1|0	4	0.00195312	0.00195312	None
1	26823631	C	0	T	12	AF=0.5	0/0/1/1	1|0	4	0.000488281	0.000488281	None
1	26825116	C	43	T	21	AF=0.5	0/0/1/1	1|0	4	0.0081469	0.0081469	None
1	26825582	C	0	G	23	AF=0.5	0/0/1/1	0|1	4	2.38419e-07	2.38419e-07	None
1	26887592	T	200	C	130	AF=0.5	0/0/1/1	1|0	4	0.000138176	0.000138176	RPS6KA1
1	26901319	G	80	A	108	AF=0.5	0/0/1/1	1|0	4	0.0486435	0.0486435	RPS6KA1
1	27081864	T	0	G	11	AF=0.5	0/0/1/1	1|0	4	0.000976562	0.000976562	ARID1A
1	27180829	A	25	C	48	AF=0.5	0/0/1/1	1|0	4	0.00954221	0.00954221	BC016143, ZDHHC18
1	27203873	C	124	A	24	AF=0.5	0/0/1/1	1|0	4	1.89258e-17	1.89258e-17	BC016143
1	27209166	G	13	T	44	AF=0.5	0/0/1/1	1|0	4	4.71044e-05	4.71044e-05	BC016143, GPN2
1	27210721	T	118	C	152	AF=0.5	0/0/1/1	1|0	4	0.0444096	0.0444096	BC016143, GPN2
1	27248273	C	386	A	326	AF=0.5	0/0/1/1	1|0	4	0.0269579	0.0269579	BC016143, NUDC
1	27426219	A	14	G	3	AF=0.5	0/0/1/1	1|0	4	0.0127258	0.0127258	SLC9A1
1	27655477	A	26	G	48	AF=0.5	0/0/1/1	0|1	4	0.01408	0.01408	TMEM222
1	27655773	A	11	C	21	AF=0.25	0/0/0/1	0|1	4	0.110184	1.47966e-06	TMEM222
1	27659351	T	12	A	33	AF=0.5	0/0/1/1	0|1	4	0.0024589	0.0024589	TMEM222
1	27876482	C	66	A	43	AF=0.5	0/0/1/1	1|0	4	0.0346154	0.0346154	AHDC1
1	28209305	A	59	G	18	AF=0.5	0/0/1/1	1|0	4	3.05506e-06	3.05506e-06	THEMIS2
1	28528222	C	1	G	18	AF=0.5	0/0/1/1	0|1	4	7.62939e-05	7.62939e-05	DNAJC8
1	28536211	G	5	A	20	AF=0.5	0/0/1/1	0|1	4	0.00407732	0.00407732	DNAJC8
1	28562540	C	0	A	11	AF=0.5	0/0/1/1	0|1	4	0.000976562	0.000976562	None
1	28563774	A	194	G	143	AF=0.5	0/0/1/1	1|0	4	0.00637138	0.00637138	ATPIF1
1	28564252	A	105	G	207	AF=0.5	0/0/1/1	0|1	4	8.00553e-09	8.00553e-09	ATPIF1
1	28566608	G	10	T	23	AF=0.5	0/0/1/1	0|1	4	0.035082	0.035082	None
1	28567075	C	58	T	18	AF=0.5	0/0/1/1	0|1	4	4.71324e-06	4.71324e-06	None
1	28567205	G	0	A	19	AF=0.5	0/0/1/1	0|1	4	3.8147e-06	3.8147e-06	None
1	28567501	A	0	G	10	AF=0.5	0/0/1/1	0|1	4	0.00195312	0.00195312	None
1	29216798	C	0	T	22	AF=0.5	0/0/1/1	0|1	4	4.76837e-07	4.76837e-07	EPB41
1	29286111	A	0	T	14	AF=0.5	0/0/1/1	0|1	4	0.00012207	0.00012207	EPB41
1	29444720	A	634	G	499	AF=0.5	0/0/1/1	1|0	4	6.73812e-05	6.73812e-05	EPB41
1	29445227	T	444	C	508	AF=0.5	0/0/1/1	1|0	4	0.041111	0.041111	EPB41
1	29445598	A	319	G	444	AF=0.5	0/0/1/1	1|0	4	6.84081e-06	6.84081e-06	EPB41
1	29475975	G	6	A	44	AF=0.5	0/0/1/1	0|1	4	3.24374e-08	3.24374e-08	SRSF4
1	29485475	C	0	T	28	AF=0.5	0/0/1/1	0|1	4	7.45058e-09	7.45058e-09	SRSF4
1	29488290	T	1	C	13	AF=0.25	0/0/0/1	1|0	4	0.00183105	1.60187e-07	SRSF4
1	29497250	T	28	C	6	AF=0.5	0/0/1/1	1|0	4	0.000195126	0.000195126	SRSF4
1	29631909	A	0	G	11	AF=0.5	0/0/1/1	0|1	4	0.000976562	0.000976562	PTPRU
1	31192330	G	68	T	21	AF=0.5	0/0/1/1	1|0	4	5.98667e-07	5.98667e-07	MATN1, MATN1-AS1
1	31195108	G	40	A	19	AF=0.5	0/0/1/1	1|0	4	0.0086415	0.0086415	MATN1, MATN1-AS1
1	31197401	C	0	T	26	AF=0.5	0/0/1/1	1|0	4	2.98023e-08	2.98023e-08	MATN1-AS1
1	31198733	A	74	G	12	AF=0.5	0/0/1/1	1|0	4	4.68976e-12	4.68976e-12	MATN1-AS1
1	31205796	T	165	C	115	AF=0.5	0/0/1/1	1|0	4	0.00333565	0.00333565	LAPTM5
1	31734841	C	2	T	19	AF=0.5	0/0/1/1	1|0	4	0.000221252	0.000221252	SNRNP40
1	31736248	A	0	G	15	AF=0.5	0/0/1/1	1|0	4	6.10352e-05	6.10352e-05	SNRNP40
1	31742629	T	1	A	12	AF=0.5	0/0/1/1	0|1	4	0.00341797	0.00341797	SNRNP40
1	31758467	C	6	T	17	AF=0.5	0/0/1/1	0|1	4	0.0346897	0.0346897	SNRNP40
1	31760665	T	72	C	43	AF=0.5	0/0/1/1	0|1	4	0.00873511	0.00873511	SNRNP40
1	31760764	A	11	T	48	AF=0.5	0/0/1/1	1|0	4	1.24163e-06	1.24163e-06	SNRNP40
1	31761056	A	5	G	37	AF=0.5	0/0/1/1	0|1	4	4.4337e-07	4.4337e-07	SNRNP40
1	31764048	A	2	T	16	AF=0.5	0/0/1/1	1|0	4	0.00131226	0.00131226	SNRNP40
1	31765685	T	0	C	24	AF=0.5	0/0/1/1	0|1	4	1.19209e-07	1.19209e-07	SNRNP40
1	31783945	T	0	C	10	AF=0.5	0/0/1/1	1|0	4	0.00195312	0.00195312	ZCCHC17
1	31831870	C	0	A	11	AF=0.5	0/0/1/1	0|1	4	0.000976562	0.000976562	ZCCHC17
1	31837089	T	199	C	203	AF=0.25	0/0/0/1	0|1	4	0.881083	6.36485e-28	ZCCHC17
1	31837683	C	31	A	68	AF=0.5	0/0/1/1	0|1	4	0.000255346	0.000255346	ZCCHC17
1	31837942	G	1	A	14	AF=0.5	0/0/1/1	0|1	4	0.000976562	0.000976562	None
1	31894402	G	0	A	12	AF=0.5	0/0/1/1	1|0	4	0.000488281	0.000488281	SERINC2
1	31898463	C	0	T	15	AF=0.5	0/0/1/1	1|0	4	6.10352e-05	6.10352e-05	SERINC2
1	31898536	C	0	T	16	AF=0.5	0/0/1/1	1|0	4	3.05176e-05	3.05176e-05	SERINC2
1	32096265	A	226	G	318	AF=0.5	0/0/1/1	0|1	4	9.22273e-05	9.22273e-05	AX747565, HCRTR1, PEF1
1	32096746	T	13	C	4	AF=0.5	0/0/1/1	0|1	4	0.0490417	0.0490417	AX747565, HCRTR1, PEF1
1	32106494	A	0	G	13	AF=0.5	0/0/1/1	0|1	4	0.000244141	0.000244141	PEF1
1	32280610	T	0	C	11	AF=0.5	0/0/1/1	1|0	4	0.000976562	0.000976562	SPOCD1
1	32513608	C	25	T	7	AF=0.5	0/0/1/1	0|1	4	0.0021024	0.0021024	KHDRBS1
1	32652787	G	1	T	24	AF=0.5	0/0/1/1	0|1	4	1.54972e-06	1.54972e-06	TXLNA
1	32659404	C	20	T	6	AF=0.5	0/0/1/1	1|0	4	0.00935531	0.00935531	TXLNA
1	32765590	C	0	T	16	AF=0.5	0/0/1/1	0|1	4	3.05176e-05	3.05176e-05	HDAC1
1	32841819	C	5	T	16	AF=0.25	0/0/0/1	0|1	4	0.0266037	1.24316e-06	BSDC1
1	33240185	G	122	C	39	AF=0.5	0/0/1/1	1|0	4	3.74981e-11	3.74981e-11	KIAA1522
1	33250684	A	9	T	30	AF=0.5	0/0/1/1	1|0	4	0.00106502	0.00106502	YARS
1	33253876	T	31	C	10	AF=0.5	0/0/1/1	1|0	4	0.00145049	0.00145049	YARS
1	33257919	A	0	G	26	AF=0.5	0/0/1/1	0|1	4	2.98023e-08	2.98023e-08	YARS
1	33275981	T	0	C	28	AF=0.5	0/0/1/1	1|0	4	7.45058e-09	7.45058e-09	YARS
1	33286484	C	13	T	4	AF=0.5	0/0/1/1	1|0	4	0.0490417	0.0490417	S100PBP
1	33290272	T	0	C	22	AF=0.5	0/0/1/1	1|0	4	4.76837e-07	4.76837e-07	S100PBP
1	33298473	T	0	C	19	AF=0.5	0/0/1/1	1|0	4	3.8147e-06	3.8147e-06	S100PBP
1	33311507	T	25	C	8	AF=0.5	0/0/1/1	1|0	4	0.00455138	0.00455138	S100PBP
1	33314700	G	0	A	16	AF=0.5	0/0/1/1	0|1	4	3.05176e-05	3.05176e-05	S100PBP
1	33321796	G	50	A	95	AF=0.5	0/0/1/1	0|1	4	0.000232466	0.000232466	S100PBP
1	33477661	G	92	C	46	AF=0.5	0/0/1/1	0|1	4	0.000111743	0.000111743	AK2, BC036308
1	33817005	A	0	G	25	AF=0.5	0/0/1/1	0|1	4	5.96046e-08	5.96046e-08	PHC2
1	33819562	C	0	T	12	AF=0.5	0/0/1/1	1|0	4	0.000488281	0.000488281	PHC2
1	34382423	C	0	T	10	AF=0.5	0/0/1/1	0|1	4	0.00195312	0.00195312	CSMD2
1	35305803	G	0	A	13	AF=0.5	0/0/1/1	1|0	4	0.000244141	0.000244141	None
1	35318934	C	2	T	34	AF=0.5	0/0/1/1	0|1	4	1.94123e-08	1.94123e-08	SMIM12
1	35318957	T	2	G	17	AF=0.5	0/0/1/1	0|1	4	0.000728607	0.000728607	SMIM12
1	35319610	A	0	C	32	AF=0.5	0/0/1/1	0/1	4	4.65661e-10	4.65661e-10	SMIM12
1	35319681	T	52	C	24	AF=0.5	0/0/1/1	0|1	4	0.00176187	0.00176187	SMIM12
1	35567813	A	27	G	6	AF=0.5	0/0/1/1	0|1	4	0.000324063	0.000324063	ZMYM1
1	35828403	A	0	T	19	AF=0.5	0/0/1/1	0/1	4	3.8147e-06	3.8147e-06	ZMYM4
1	36011034	A	0	G	23	AF=0.5	0/0/1/1	0|1	4	2.38419e-07	2.38419e-07	KIAA0319L
1	36102034	C	8	T	12	AF=0.25	0/0/0/1	0/1	4	0.503445	0.000935392	PSMB2
1	36388080	A	141	G	51	AF=0.5	0/0/1/1	0|1	4	5.94769e-11	5.94769e-11	AGO1
1	36491502	G	0	C	11	AF=0.5	0/0/1/1	1|0	4	0.000976562	0.000976562	AGO3
1	36641729	C	3	T	24	AF=0.5	0/0/1/1	1|0	4	4.92334e-05	4.92334e-05	MAP7D1
1	36642420	T	186	C	91	AF=0.5	0/0/1/1	1|0	4	1.179e-08	1.179e-08	MAP7D1
1	36690599	A	6	G	39	AF=0.5	0/0/1/1	0|1	4	5.41777e-07	5.41777e-07	THRAP3
1	36690870	C	1	A	32	AF=0.5	0/0/1/1	0|1	4	7.91624e-09	7.91624e-09	THRAP3
1	36751209	A	16	G	4	AF=0.75	0/1/1/1	0|1	4	0.0118179	3.86532e-07	THRAP3
1	36752152	C	749	T	517	AF=0.5	0/0/1/1	1|0	4	7.51267e-11	7.51267e-11	THRAP3
1	36787888	G	101	A	172	AF=0.5	0/0/1/1	1|0	4	2.05298e-05	2.05298e-05	EVA1B, SH3D21
1	36791358	G	40	T	10	AF=0.5	0/0/1/1	0|1	4	2.38613e-05	2.38613e-05	None
1	36792078	C	0	T	12	AF=0.5	0/0/1/1	1|0	4	0.000488281	0.000488281	None
1	36793959	G	62	A	14	AF=0.5	0/0/1/1	0|1	4	2.32365e-08	2.32365e-08	None
1	36807930	C	0	A	27	AF=0.5	0/0/1/1	1|0	4	1.49012e-08	1.49012e-08	STK40
1	36814473	C	0	T	21	AF=0.5	0/0/1/1	0|1	4	9.53674e-07	9.53674e-07	STK40
1	36820927	G	177	A	247	AF=0.5	0/0/1/1	0|1	4	0.000785832	0.000785832	STK40
1	36821402	A	0	G	18	AF=0.5	0/0/1/1	0|1	4	7.62939e-06	7.62939e-06	STK40
1	36828659	G	0	C	29	AF=0.5	0/0/1/1	0|1	4	3.72529e-09	3.72529e-09	STK40
1	36836620	C	0	G	27	AF=0.5	0/0/1/1	0|1	4	1.49012e-08	1.49012e-08	STK40
1	36847305	G	0	T	12	AF=0.5	0/0/1/1	0|1	4	0.000488281	0.000488281	STK40
1	36855033	G	2	T	10	AF=0.5	0/0/1/1	0|1	4	0.0385742	0.0385742	None
1	36857144	C	20	T	4	AF=0.5	0/0/1/1	0|1	4	0.00154388	0.00154388	None
1	36861307	A	0	G	11	AF=0.5	0/0/1/1	0|1	4	0.000976562	0.000976562	LSM10
1	36862091	C	5	G	21	AF=0.5	0/0/1/1	0|1	4	0.00249392	0.00249392	LSM10
1	36862295	G	1	A	16	AF=0.5	0/0/1/1	0|1	4	0.000274658	0.000274658	LSM10
1	36922959	T	5	C	39	AF=0.5	0/0/1/1	0|1	4	1.40516e-07	1.40516e-07	MRPS15
1	36927733	G	721	A	633	AF=0.5	0/0/1/1	0|1	4	0.0180296	0.0180296	MRPS15
1	37944506	G	1	A	16	AF=0.5	0/0/1/1	0|1	4	0.000274658	0.000274658	ZC3H12A
1	37958389	A	35	G	19	AF=0.5	0/0/1/1	1|0	4	0.0402236	0.0402236	MEAF6
1	37958813	C	42	G	18	AF=0.5	0/0/1/1	1|0	4	0.00267044	0.00267044	MEAF6
1	37961613	A	1	G	29	AF=0.5	0/0/1/1	1|0	4	5.7742e-08	5.7742e-08	MEAF6
1	37972258	T	0	G	13	AF=0.5	0/0/1/1	1|0	4	0.000244141	0.000244141	MEAF6
1	38040259	G	36	A	12	AF=0.5	0/0/1/1	0|1	4	0.00071727	0.00071727	GNL2
1	38164880	C	33	G	16	AF=0.5	0/0/1/1	0|1	4	0.0212941	0.0212941	CDCA8
1	38267448	G	0	C	16	AF=0.5	0/0/1/1	0|1	4	3.05176e-05	3.05176e-05	None
1	38268918	T	396	C	300	AF=0.5	0/0/1/1	0|1	4	0.000310761	0.000310761	YRDC
1	38276997	G	11	A	24	AF=0.5	0/0/1/1	0|1	4	0.0409596	0.0409596	MTF1
1	38278923	A	17	T	52	AF=0.5	0/0/1/1	0|1	4	2.93043e-05	2.93043e-05	MTF1
1	38279987	T	1	C	34	AF=0.5	0/0/1/1	0|1	4	2.09548e-09	2.09548e-09	MTF1
1	38302836	A	1	G	17	AF=0.5	0/0/1/1	0|1	4	0.000144958	0.000144958	MTF1
1	38326654	A	58	G	137	AF=0.5	0/0/1/1	0|1	4	1.49333e-08	1.49333e-08	INPP5B
1	38338795	A	24	G	85	AF=0.5	0/0/1/1	0|1	4	3.50483e-09	3.50483e-09	INPP5B
1	38397369	C	0	T	20	AF=0.5	0/0/1/1	0|1	4	1.90735e-06	1.90735e-06	INPP5B
1	38407014	C	0	T	17	AF=0.5	0/0/1/1	0|1	4	1.52588e-05	1.52588e-05	INPP5B
1	38423521	T	561	G	410	AF=0.5	0/0/1/1	1|0	4	1.41437e-06	1.41437e-06	SF3A3
1	38434306	G	21	A	37	AF=0.5	0/0/1/1	1|0	4	0.0479403	0.0479403	SF3A3
1	38455891	G	102	C	22	AF=0.5	0/0/1/1	0|1	4	1.6602e-13	1.6602e-13	None
1	38456106	G	6	A	35	AF=0.5	0/0/1/1	1|0	4	4.8736e-06	4.8736e-06	None
1	38461319	C	62	A	29	AF=0.5	0/0/1/1	0|1	4	0.000705341	0.000705341	None
1	38463504	C	118	T	218	AF=0.5	0/0/1/1	1|0	4	5.33211e-08	5.33211e-08	FHL3
1	38480706	T	15	C	35	AF=0.5	0/0/1/1	0|1	4	0.00660045	0.00660045	UTP11L
1	39461570	G	0	A	13	AF=0.5	0/0/1/1	0|1	4	0.000244141	0.000244141	AKIRIN1
1	39814960	C	0	T	44	AF=0.5	0/0/1/1	0|1	4	1.13687e-13	1.13687e-13	MACF1
1	39815143	T	1	A	32	AF=0.5	0/0/1/1	0|1	4	7.91624e-09	7.91624e-09	MACF1
1	39874539	G	0	T	13	AF=0.5	0/0/1/1	0|1	4	0.000244141	0.000244141	MACF1
1	39908506	G	165	A	226	AF=0.5	0/0/1/1	0|1	4	0.00236827	0.00236827	MACF1
1	39940499	T	0	C	11	AF=0.5	0/0/1/1	0|1	4	0.000976562	0.000976562	MACF1
1	39948224	A	0	G	23	AF=0.5	0/0/1/1	1|0	4	2.38419e-07	2.38419e-07	MACF1
1	40032832	C	53	T	26	AF=0.5	0/0/1/1	1|0	4	0.00318301	0.00318301	PABPC4
1	40033905	G	61	A	49	AF=0.75	0/1/1/1	0|1	4	0.294234	1.05552e-11	PABPC4
1	40036847	G	173	C	67	AF=0.5	0/0/1/1	0|1	4	5.51738e-12	5.51738e-12	PABPC4
1	40041714	G	42	A	217	AF=0.5	0/0/1/1	1|0	4	1.28749e-29	1.28749e-29	PABPC4
1	40212957	T	22	C	8	AF=0.5	0/0/1/1	0|1	4	0.0161248	0.0161248	PPIE
1	40219280	T	74	C	196	AF=0.5	0/0/1/1	0|1	4	6.6511e-14	6.6511e-14	PPIE
1	40319024	T	0	A	13	AF=0.5	0/0/1/1	0|1	4	0.000244141	0.000244141	TRIT1
1	40319132	A	0	G	11	AF=0.5	0/0/1/1	0|1	4	0.000976562	0.000976562	TRIT1
1	40319379	T	13	C	4	AF=0.5	0/0/1/1	0|1	4	0.0490417	0.0490417	TRIT1
1	40319587	A	24	C	5	AF=0.5	0/0/1/1	0|1	4	0.000546113	0.000546113	AK304759, TRIT1
1	40324097	T	0	C	33	AF=0.5	0/0/1/1	0|1	4	2.32831e-10	2.32831e-10	TRIT1
1	40535006	C	0	T	14	AF=0.75	0/1/1/1	0|1	4	0.00012207	0.0281275	CAP1
1	40844036	A	3	G	57	AF=0.5	0/0/1/1	0|1	4	6.25385e-14	6.25385e-14	SMAP2
1	40923019	G	1	A	18	AF=0.5	0/0/1/1	1|0	4	7.62939e-05	7.62939e-05	ZFP69B
1	40939737	A	0	C	19	AF=0.5	0/0/1/1	1|0	4	3.8147e-06	3.8147e-06	None
1	40975260	G	0	C	10	AF=0.5	0/0/1/1	1|0	4	0.00195312	0.00195312	EXO5
1	40980559	G	0	A	21	AF=0.5	0/0/1/1	1|0	4	9.53674e-07	9.53674e-07	EXO5
1	40980731	G	3	T	12	AF=0.5	0/0/1/1	1|0	4	0.0351562	0.0351562	EXO5
1	41005960	A	5	G	15	AF=0.5	0/0/1/1	1|0	4	0.0413895	0.0413895	ZNF684
1	41013173	G	0	A	36	AF=0.5	0/0/1/1	0|1	4	2.91038e-11	2.91038e-11	ZNF684
1	41151333	A	1	C	11	AF=0.5	0/0/1/1	0|1	4	0.00634766	0.00634766	None
1	41156491	C	23	G	48	AF=0.5	0/0/1/1	0|1	4	0.00406512	0.00406512	LOC100130557
1	41164832	G	0	A	16	AF=0.5	0/0/1/1	1|0	4	3.05176e-05	3.05176e-05	NFYC
1	41169900	C	2	T	17	AF=0.5	0/0/1/1	1|0	4	0.000728607	0.000728607	NFYC
1	41231057	C	0	T	12	AF=0.5	0/0/1/1	0|1	4	0.000488281	0.000488281	NFYC
1	41286702	T	0	C	40	AF=0.5	0/0/1/1	0|1	4	1.81899e-12	1.81899e-12	KCNQ4
1	41286890	T	0	C	38	AF=0.5	0/0/1/1	0|1	4	7.27596e-12	7.27596e-12	KCNQ4
1	41296828	T	3	G	14	AF=0.5	0/0/1/1	1|0	4	0.0127258	0.0127258	KCNQ4
1	41300690	G	6	A	30	AF=0.5	0/0/1/1	1|0	4	6.96017e-05	6.96017e-05	KCNQ4
1	41444603	G	0	A	13	AF=0.5	0/0/1/1	0|1	4	0.000244141	0.000244141	None
1	41446231	T	0	G	10	AF=0.5	0/0/1/1	0|1	4	0.00195312	0.00195312	CTPS1
1	41449629	G	1	A	10	AF=0.5	0/0/1/1	0|1	4	0.0117188	0.0117188	CTPS1
1	41450911	T	0	C	10	AF=0.5	0/0/1/1	0|1	4	0.00195312	0.00195312	CTPS1
1	41453053	A	310	T	172	AF=0.5	0/0/1/1	0|1	4	3.3348e-10	3.3348e-10	CTPS1
1	41488904	G	18	A	4	AF=0.5	0/0/1/1	0|1	4	0.00434351	0.00434351	SLFNL1-AS1
1	41497443	C	0	T	22	AF=0.5	0/0/1/1	0|1	4	4.76837e-07	4.76837e-07	SCMH1, SLFNL1-AS1
1	41497628	A	0	G	30	AF=0.5	0/0/1/1	0|1	4	1.86265e-09	1.86265e-09	SCMH1, SLFNL1-AS1
1	41508141	G	23	A	7	AF=0.5	0/0/1/1	0|1	4	0.00522288	0.00522288	SCMH1, SLFNL1-AS1
1	41508490	C	0	T	17	AF=0.5	0/0/1/1	0|1	4	1.52588e-05	1.52588e-05	SCMH1, SLFNL1-AS1
1	41524538	T	0	C	10	AF=0.5	0/0/1/1	1|0	4	0.00195312	0.00195312	SCMH1
1	41607803	T	2	A	13	AF=0.5	0/0/1/1	1|0	4	0.00738525	0.00738525	SCMH1
1	41636681	T	0	C	10	AF=0.5	0/0/1/1	1|0	4	0.00195312	0.00195312	SCMH1
1	41661732	A	0	C	18	AF=0.5	0/0/1/1	0|1	4	7.62939e-06	7.62939e-06	SCMH1
1	41707111	A	0	G	20	AF=0.5	0/0/1/1	0|1	4	1.90735e-06	1.90735e-06	SCMH1
1	42724250	C	0	G	11	AF=0.5	0/0/1/1	1|0	4	0.000976562	0.000976562	FOXJ3
1	42923470	A	0	G	25	AF=0.5	0/0/1/1	0|1	4	5.96046e-08	5.96046e-08	PPCS
1	42925688	T	54	G	84	AF=0.5	0/0/1/1	0|1	4	0.0132732	0.0132732	PPCS
1	43126733	G	0	A	22	AF=0.5	0/0/1/1	1|0	4	4.76837e-07	4.76837e-07	PPIH
1	43126766	C	0	A	16	AF=0.5	0/0/1/1	1|0	4	3.05176e-05	3.05176e-05	PPIH
1	43137280	A	0	G	16	AF=0.5	0/0/1/1	0|1	4	3.05176e-05	3.05176e-05	PPIH
1	43137340	C	38	A	16	AF=0.5	0/0/1/1	0|1	4	0.00383827	0.00383827	PPIH
1	43141065	A	62	C	12	AF=0.5	0/0/1/1	0|1	4	2.85555e-09	2.85555e-09	PPIH
1	43158510	C	0	T	16	AF=0.5	0/0/1/1	0|1	4	3.05176e-05	3.05176e-05	YBX1
1	43165341	A	0	C	10	AF=0.5	0/0/1/1	0|1	4	0.00195312	0.00195312	YBX1
1	43238031	A	4	G	28	AF=0.5	0/0/1/1	1|0	4	1.93012e-05	1.93012e-05	C1orf50
1	43272246	C	0	T	23	AF=0.5	0/0/1/1	1|0	4	2.38419e-07	2.38419e-07	None
1	43281980	A	2	C	27	AF=0.5	0/0/1/1	1|0	4	1.62423e-06	1.62423e-06	CCDC23
1	43282455	C	2	T	18	AF=0.5	0/0/1/1	0|1	4	0.000402451	0.000402451	CCDC23
1	43285754	C	0	T	12	AF=0.5	0/0/1/1	1|0	4	0.000488281	0.000488281	ERMAP
1	43296173	C	29	T	60	AF=0.5	0/0/1/1	1|0	4	0.00133526	0.00133526	ERMAP
1	43296195	C	51	T	85	AF=0.5	0/0/1/1	1|0	4	0.00448125	0.00448125	ERMAP
1	43298067	T	37	C	25	AF=0.25	0/0/0/1	0|1	4	0.161881	0.00784288	ERMAP
1	43300253	T	0	C	14	AF=0.5	0/0/1/1	0|1	4	0.00012207	0.00012207	ERMAP
1	43300663	T	21	C	5	AF=0.5	0/0/1/1	1|0	4	0.00249392	0.00249392	ERMAP
1	43303365	G	2	C	10	AF=0.5	0/0/1/1	1|0	4	0.0385742	0.0385742	ERMAP
1	43304368	C	0	A	24	AF=0.5	0/0/1/1	1|0	4	1.19209e-07	1.19209e-07	ERMAP
1	43310639	A	16	G	55	AF=0.5	0/0/1/1	1|0	4	3.75324e-06	3.75324e-06	ERMAP
1	43311563	A	0	G	22	AF=0.5	0/0/1/1	1|0	4	4.76837e-07	4.76837e-07	None
1	43312506	G	0	C	27	AF=0.5	0/0/1/1	0|1	4	1.49012e-08	1.49012e-08	ZNF691
1	43392250	C	327	G	614	AF=0.5	0/0/1/1	1|0	4	5.62727e-21	5.62727e-21	SLC2A1
1	43395635	C	190	T	361	AF=0.5	0/0/1/1	1|0	4	2.86422e-13	2.86422e-13	SLC2A1
1	43396414	G	153	A	322	AF=0.5	0/0/1/1	1|0	4	6.63874e-15	6.63874e-15	SLC2A1
1	43399167	G	2	T	20	AF=0.5	0/0/1/1	1|0	4	0.000121117	0.000121117	SLC2A1
1	43400016	C	0	T	10	AF=0.5	0/0/1/1	1|0	4	0.00195312	0.00195312	SLC2A1
1	43402054	T	4	C	17	AF=0.5	0/0/1/1	1|0	4	0.00719738	0.00719738	SLC2A1
1	43402205	G	0	A	10	AF=0.5	0/0/1/1	1|0	4	0.00195312	0.00195312	SLC2A1
1	43402601	A	0	G	17	AF=0.5	0/0/1/1	1|0	4	1.52588e-05	1.52588e-05	SLC2A1
1	43402708	T	0	C	13	AF=0.5	0/0/1/1	1|0	4	0.000244141	0.000244141	SLC2A1
1	43408966	G	83	A	293	AF=0.5	0/0/1/1	1|0	4	1.40219e-28	1.40219e-28	SLC2A1
1	43411829	G	0	A	32	AF=0.5	0/0/1/1	1|0	4	4.65661e-10	4.65661e-10	SLC2A1
1	43411831	C	0	T	32	AF=0.5	0/0/1/1	1|0	4	4.65661e-10	4.65661e-10	SLC2A1
1	43416781	C	29	T	9	AF=0.5	0/0/1/1	0|1	4	0.00165805	0.00165805	SLC2A1
1	43439282	C	7	T	23	AF=0.5	0/0/1/1	1|0	4	0.00522288	0.00522288	SLC2A1-AS1
1	43447091	C	3	T	12	AF=0.5	0/0/1/1	0|1	4	0.0351562	0.0351562	SLC2A1-AS1
1	43447310	C	0	T	17	AF=0.5	0/0/1/1	0|1	4	1.52588e-05	1.52588e-05	SLC2A1-AS1
1	43628449	C	0	A	20	AF=0.5	0/0/1/1	1|0	4	1.90735e-06	1.90735e-06	None
1	43631402	T	3	C	23	AF=0.5	0/0/1/1	1|0	4	8.79765e-05	8.79765e-05	EBNA1BP2
1	43632536	C	1204	T	1473	AF=0.5	0/0/1/1	1|0	4	2.17233e-07	2.17233e-07	EBNA1BP2
1	43635875	A	0	G	14	AF=0.5	0/0/1/1	1|0	4	0.00012207	0.00012207	EBNA1BP2
1	43636484	C	980	G	821	AF=0.5	0/0/1/1	1|0	4	0.000195096	0.000195096	EBNA1BP2
1	43828663	G	585	A	754	AF=0.5	0/0/1/1	1|0	4	4.28836e-06	4.28836e-06	CDC20
1	43858630	G	0	A	13	AF=0.5	0/0/1/1	0|1	4	0.000244141	0.000244141	SZT2
1	43858637	A	0	G	13	AF=0.5	0/0/1/1	0|1	4	0.000244141	0.000244141	SZT2
1	43872067	C	0	T	20	AF=0.5	0/0/1/1	0|1	4	1.90735e-06	1.90735e-06	SZT2
1	43874202	A	3	G	14	AF=0.5	0/0/1/1	0|1	4	0.0127258	0.0127258	SZT2
1	43890864	C	11	T	48	AF=0.5	0/0/1/1	1|0	4	1.24163e-06	1.24163e-06	SZT2
1	43892189	G	37	A	15	AF=0.5	0/0/1/1	0|1	4	0.00318525	0.00318525	SZT2
1	43912590	A	0	G	13	AF=0.5	0/0/1/1	0|1	4	0.000244141	0.000244141	SZT2
1	43917409	T	19	C	43	AF=0.5	0/0/1/1	0|1	4	0.00315606	0.00315606	HYI, SZT2
1	43917637	G	27	A	11	AF=0.5	0/0/1/1	0|1	4	0.013853	0.013853	HYI, SZT2
1	44029353	C	0	G	14	AF=0.5	0/0/1/1	1|0	4	0.00012207	0.00012207	PTPRF
1	44052673	T	0	C	10	AF=0.5	0/0/1/1	1|0	4	0.00195312	0.00195312	PTPRF
1	44052778	G	0	A	10	AF=0.5	0/0/1/1	1|0	4	0.00195312	0.00195312	PTPRF
1	44129209	T	0	C	13	AF=0.5	0/0/1/1	1|0	4	0.000244141	0.000244141	KDM4A
1	44137257	C	45	A	25	AF=0.5	0/0/1/1	1|0	4	0.0224629	0.0224629	KDM4A
1	44174793	T	4	G	25	AF=0.5	0/0/1/1	1|0	4	0.000103716	0.000103716	ST3GAL3
1	44175944	G	0	A	15	AF=0.5	0/0/1/1	1|0	4	6.10352e-05	6.10352e-05	ST3GAL3
1	44204301	C	4	T	17	AF=0.5	0/0/1/1	1|0	4	0.00719738	0.00719738	ST3GAL3
1	44221529	G	0	C	14	AF=0.5	0/0/1/1	1|0	4	0.00012207	0.00012207	ST3GAL3
1	44287186	C	0	T	25	AF=0.5	0/0/1/1	1|0	4	5.96046e-08	5.96046e-08	ST3GAL3
1	44289080	G	0	A	18	AF=0.5	0/0/1/1	1|0	4	7.62939e-06	7.62939e-06	ST3GAL3
1	44296439	C	0	G	11	AF=0.5	0/0/1/1	1|0	4	0.000976562	0.000976562	ST3GAL3
1	44365457	A	3	G	31	AF=0.5	0/0/1/1	0|1	4	7.66013e-07	7.66013e-07	ST3GAL3
1	44373409	A	14	G	29	AF=0.5	0/0/1/1	0|1	4	0.0315395	0.0315395	ST3GAL3
1	44373439	C	3	T	33	AF=0.5	0/0/1/1	0|1	4	2.27214e-07	2.27214e-07	ST3GAL3
1	44379577	A	6	G	26	AF=0.5	0/0/1/1	0|1	4	0.000535053	0.000535053	ST3GAL3
1	44379957	G	11	A	26	AF=0.5	0/0/1/1	1|0	4	0.0200739	0.0200739	ST3GAL3
1	44409048	A	5	G	18	AF=0.5	0/0/1/1	0|1	4	0.010622	0.010622	None
1	44438961	A	68	G	105	AF=0.5	0/0/1/1	0|1	4	0.00603784	0.00603784	DPH2
1	44442521	A	24	C	5	AF=0.5	0/0/1/1	1|0	4	0.000546113	0.000546113	ATP6V0B
1	44442930	A	19	G	57	AF=0.5	0/0/1/1	0|1	4	1.48369e-05	1.48369e-05	ATP6V0B
1	44455203	T	4	C	27	AF=0.5	0/0/1/1	1|0	4	3.39532e-05	3.39532e-05	B4GALT2
1	44457305	G	0	A	18	AF=0.5	0/0/1/1	1|0	4	7.62939e-06	7.62939e-06	CCDC24, SLC6A9
1	44464205	A	36	G	10	AF=0.5	0/0/1/1	1|0	4	0.000156417	0.000156417	SLC6A9
1	44486239	C	0	T	16	AF=0.5	0/0/1/1	1|0	4	3.05176e-05	3.05176e-05	SLC6A9
1	44680719	G	5	C	41	AF=0.5	0/0/1/1	0|1	4	4.40594e-08	4.40594e-08	DMAP1
1	44681483	C	56	G	18	AF=0.5	0/0/1/1	0|1	4	1.10911e-05	1.10911e-05	DMAP1
1	44682084	A	45	T	13	AF=0.5	0/0/1/1	0|1	4	3.01159e-05	3.01159e-05	DMAP1
1	44686322	T	0	C	43	AF=0.5	0/0/1/1	0|1	4	2.27374e-13	2.27374e-13	DMAP1
1	44746217	G	5	A	19	AF=0.5	0/0/1/1	0|1	4	0.00661075	0.00661075	ERI3
1	45097513	G	0	T	16	AF=0.5	0/0/1/1	1|0	4	3.05176e-05	3.05176e-05	RNF220
1	45101478	T	0	C	10	AF=0.5	0/0/1/1	1|0	4	0.00195312	0.00195312	RNF220
1	45116985	C	276	T	340	AF=0.5	0/0/1/1	1|0	4	0.0110783	0.0110783	RNF220
1	45136783	G	0	A	15	AF=0.5	0/0/1/1	1|0	4	6.10352e-05	6.10352e-05	TMEM53
1	45205598	T	487	C	657	AF=0.5	0/0/1/1	1|0	4	5.57513e-07	5.57513e-07	KIF2C
1	45218895	A	456	T	535	AF=0.5	0/0/1/1	1|0	4	0.0131816	0.0131816	KIF2C
1	45224007	G	1	T	11	AF=0.5	0/0/1/1	1|0	4	0.00634766	0.00634766	KIF2C
1	45224998	A	633	C	528	AF=0.5	0/0/1/1	1|0	4	0.00225769	0.00225769	KIF2C
1	45229481	G	5	A	15	AF=0.5	0/0/1/1	0|1	4	0.0413895	0.0413895	KIF2C
1	45312867	G	1	A	15	AF=0.5	0/0/1/1	1|0	4	0.000518799	0.000518799	None
1	45321480	C	0	T	10	AF=0.5	0/0/1/1	1|0	4	0.00195312	0.00195312	EIF2B3
1	45337818	T	0	C	14	AF=0.25	0/0/0/1	0|1	4	0.00012207	3.72529e-09	EIF2B3
1	45360658	A	0	C	15	AF=0.5	0/0/1/1	0|1	4	6.10352e-05	6.10352e-05	EIF2B3
1	45384332	G	1	T	13	AF=0.5	0/0/1/1	1|0	4	0.00183105	0.00183105	EIF2B3
1	45443894	T	4	C	38	AF=0.5	0/0/1/1	1|0	4	5.65315e-08	5.65315e-08	EIF2B3
1	45449786	A	0	G	11	AF=0.5	0/0/1/1	1|0	4	0.000976562	0.000976562	EIF2B3
1	45468606	A	52	G	173	AF=0.5	0/0/1/1	0|1	4	2.22704e-16	2.22704e-16	HECTD3
1	45473392	T	0	C	17	AF=0.5	0/0/1/1	1|0	4	1.52588e-05	1.52588e-05	HECTD3
1	45809944	G	0	T	13	AF=0.5	0/0/1/1	1|0	4	0.000244141	0.000244141	TESK2
1	45915892	A	0	T	21	AF=0.5	0/0/1/1	1|0	4	9.53674e-07	9.53674e-07	TESK2
1	45965307	G	18	A	5	AF=0.5	0/0/1/1	0|1	4	0.010622	0.010622	CCDC163P
1	45973928	G	66	A	35	AF=0.5	0/0/1/1	0|1	4	0.00265379	0.00265379	MMACHC
1	45976472	G	31	C	12	AF=0.5	0/0/1/1	0|1	4	0.00540157	0.00540157	MMACHC
1	45976587	A	32	G	13	AF=0.5	0/0/1/1	0|1	4	0.00660882	0.00660882	MMACHC
1	45980862	T	0	G	18	AF=0.5	0/0/1/1	0|1	4	7.62939e-06	7.62939e-06	PRDX1
1	45983080	C	1	T	11	AF=0.5	0/0/1/1	0|1	4	0.00634766	0.00634766	PRDX1
1	46016687	T	131	C	169	AF=0.5	0/0/1/1	0|1	4	0.0324908	0.0324908	AKR1A1
1	46018720	C	1	A	22	AF=0.5	0/0/1/1	0|1	4	5.72205e-06	5.72205e-06	AKR1A1
1	46051416	C	1	T	24	AF=0.5	0/0/1/1	0|1	4	1.54972e-06	1.54972e-06	NASP
1	46073489	G	335	A	263	AF=0.5	0/0/1/1	0|1	4	0.00365582	0.00365582	NASP
1	46075799	A	18	G	45	AF=0.5	0/0/1/1	1|0	4	0.000898047	0.000898047	NASP
1	46083706	C	0	G	30	AF=0.5	0/0/1/1	1|0	4	1.86265e-09	1.86265e-09	NASP
1	46084383	G	82	T	44	AF=0.5	0/0/1/1	1|0	4	0.000905277	0.000905277	NASP
1	46086329	C	3	T	22	AF=0.5	0/0/1/1	1|0	4	0.000156522	0.000156522	CCDC17
1	46095989	T	1	C	17	AF=0.5	0/0/1/1	1|0	4	0.000144958	0.000144958	GPBP1L1
1	46113272	T	0	C	15	AF=0.5	0/0/1/1	1|0	4	6.10352e-05	6.10352e-05	GPBP1L1
1	46124088	C	60	G	19	AF=0.5	0/0/1/1	1|0	4	4.19404e-06	4.19404e-06	GPBP1L1
1	46163477	A	21	C	6	AF=0.5	0/0/1/1	1|0	4	0.00592461	0.00592461	IPP
1	46163733	A	52	G	12	AF=0.5	0/0/1/1	1|0	4	4.56661e-07	4.56661e-07	IPP
1	46219803	C	0	T	12	AF=0.5	0/0/1/1	0|1	4	0.000488281	0.000488281	None
1	46289416	C	0	T	11	AF=0.5	0/0/1/1	0|1	4	0.000976562	0.000976562	MAST2
1	46411715	T	0	C	22	AF=0.5	0/0/1/1	1|0	4	4.76837e-07	4.76837e-07	MAST2
1	46476587	T	52	G	27	AF=0.5	0/0/1/1	0|1	4	0.0065533	0.0065533	MAST2
1	46493460	T	70	G	30	AF=0.5	0/0/1/1	0|1	4	7.85014e-05	7.85014e-05	MAST2
1	46501359	A	114	G	63	AF=0.5	0/0/1/1	1|0	4	0.000155481	0.000155481	MAST2
1	46592278	C	0	T	15	AF=0.5	0/0/1/1	1|0	4	6.10352e-05	6.10352e-05	PIK3R3
1	46660295	T	129	C	356	AF=0.5	0/0/1/1	1|0	4	1.28739e-25	1.28739e-25	POMGNT1
1	46718917	T	32	C	6	AF=0.5	0/0/1/1	0|1	4	2.43426e-05	2.43426e-05	RAD54L
1	46760166	C	0	T	26	AF=0.5	0/0/1/1	1|0	4	2.98023e-08	2.98023e-08	LRRC41
1	46768408	T	4	C	18	AF=0.5	0/0/1/1	0|1	4	0.00434351	0.00434351	LRRC41
1	46781462	G	9	C	30	AF=0.5	0/0/1/1	0|1	4	0.00106502	0.00106502	UQCRH
1	46807597	G	3	A	16	AF=0.5	0/0/1/1	1|0	4	0.00442505	0.00442505	NSUN4
1	46813848	G	35	A	19	AF=0.5	0/0/1/1	1|0	4	0.0402236	0.0402236	NSUN4
1	46815375	A	1	T	39	AF=0.5	0/0/1/1	0|1	4	7.45786e-11	7.45786e-11	NSUN4
1	47039662	C	3	A	12	AF=0.5	0/0/1/1	1|0	4	0.0351562	0.0351562	MKNK1
1	47055948	G	31	A	7	AF=0.5	0/0/1/1	0|1	4	0.000116167	0.000116167	MKNK1
1	47057633	T	3	C	25	AF=0.5	0/0/1/1	1|0	4	2.74405e-05	2.74405e-05	MKNK1
1	47062900	G	0	A	11	AF=0.5	0/0/1/1	1|0	4	0.000976562	0.000976562	MKNK1
1	47099235	A	6	C	116	AF=0.5	0/0/1/1	0|1	4	1.60187e-27	1.60187e-27	ATPAF1
1	47099721	T	0	C	116	AF=0.5	0/0/1/1	0|1	4	2.40741e-35	2.40741e-35	ATPAF1
1	47100099	C	0	A	18	AF=0.5	0/0/1/1	0|1	4	7.62939e-06	7.62939e-06	ATPAF1
1	47130594	C	9	T	22	AF=0.5	0/0/1/1	0|1	4	0.0294494	0.0294494	ATPAF1, EFCAB14
1	47140337	G	0	A	14	AF=0.5	0/0/1/1	1|0	4	0.00012207	0.00012207	EFCAB14, EFCAB14-AS1
1	47140376	G	0	A	14	AF=0.5	0/0/1/1	1|0	4	0.00012207	0.00012207	EFCAB14, EFCAB14-AS1
1	47142538	G	63	A	41	AF=0.5	0/0/1/1	1|0	4	0.0389579	0.0389579	EFCAB14, EFCAB14-AS1
1	47143547	A	37	G	78	AF=0.5	0/0/1/1	1|0	4	0.000165524	0.000165524	EFCAB14, EFCAB14-AS1
1	47154272	C	0	T	10	AF=0.5	0/0/1/1	1|0	4	0.00195312	0.00195312	EFCAB14, EFCAB14-AS1
1	47159109	G	3	T	12	AF=0.5	0/0/1/1	1|0	4	0.0351562	0.0351562	EFCAB14
1	47184181	C	101	T	57	AF=0.5	0/0/1/1	1|0	4	0.000580127	0.000580127	EFCAB14
1	47184569	G	56	C	128	AF=0.5	0/0/1/1	1|0	4	1.15542e-07	1.15542e-07	EFCAB14
1	47669962	C	4	T	29	AF=0.5	0/0/1/1	1|0	4	1.09286e-05	1.09286e-05	None
1	47674768	C	15	T	4	AF=0.5	0/0/1/1	1|0	4	0.0192108	0.0192108	None
1	47682680	T	205	C	284	AF=0.5	0/0/1/1	1|0	4	0.000408975	0.000408975	TAL1
1	47717189	A	184	G	257	AF=0.5	0/0/1/1	1|0	4	0.000591228	0.000591228	STIL
1	47723824	C	0	G	22	AF=0.5	0/0/1/1	0|1	4	4.76837e-07	4.76837e-07	STIL
1	47726087	T	79	C	152	AF=0.5	0/0/1/1	0|1	4	1.79485e-06	1.79485e-06	STIL
1	47734148	T	0	C	21	AF=0.5	0/0/1/1	1|0	4	9.53674e-07	9.53674e-07	STIL
1	47748852	G	0	C	27	AF=0.5	0/0/1/1	0|1	4	1.49012e-08	1.49012e-08	STIL
1	47748951	T	0	C	26	AF=0.5	0/0/1/1	0|1	4	2.98023e-08	2.98023e-08	STIL
1	47763713	C	0	T	10	AF=0.5	0/0/1/1	0|1	4	0.00195312	0.00195312	STIL
1	47767914	G	100	A	249	AF=0.5	0/0/1/1	0|1	4	8.45423e-16	8.45423e-16	STIL
1	47772653	A	0	G	11	AF=0.5	0/0/1/1	0|1	4	0.000976562	0.000976562	STIL
1	47800845	A	0	C	17	AF=0.5	0/0/1/1	0|1	4	1.52588e-05	1.52588e-05	CMPK1
1	47829507	C	6	T	5	AF=0.75	0/1/1/1	0|1	4	1	0.0343275	CMPK1
1	47835150	C	7	G	29	AF=0.5	0/0/1/1	0|1	4	0.000312551	0.000312551	CMPK1
1	47844464	G	41	A	74	AF=0.5	0/0/1/1	1|0	4	0.0026857	0.0026857	CMPK1
1	47847468	G	0	C	36	AF=0.5	0/0/1/1	0|1	4	2.91038e-11	2.91038e-11	None
1	47849756	T	1	C	10	AF=0.5	0/0/1/1	1|0	4	0.0117188	0.0117188	None
1	51302916	C	0	G	10	AF=0.5	0/0/1/1	0|1	4	0.00195312	0.00195312	FAF1
1	51306958	T	0	C	14	AF=0.5	0/0/1/1	0|1	4	0.00012207	0.00012207	FAF1
1	51397876	C	0	T	10	AF=0.5	0/0/1/1	0|1	4	0.00195312	0.00195312	FAF1
1	52020692	C	1	T	19	AF=0.5	0/0/1/1	1|0	4	4.00543e-05	4.00543e-05	None
1	52026384	C	6	A	19	AF=0.5	0/0/1/1	1|0	4	0.0146333	0.0146333	None
1	52030379	G	0	A	14	AF=0.5	0/0/1/1	0|1	4	0.00012207	0.00012207	None
1	53151249	G	1	T	80	AF=0.75	0/1/1/1	0/1	4	6.78288e-23	3.27867e-09	None
1	53676448	G	24	A	41	AF=0.5	0/0/1/1	1|0	4	0.0463535	0.0463535	CPT2
1	53681699	T	243	G	462	AF=0.5	0/0/1/1	1|0	4	1.2617e-16	1.2617e-16	C1orf123
1	53697139	A	0	G	15	AF=0.5	0/0/1/1	1|0	4	6.10352e-05	6.10352e-05	MAGOH
1	53713336	A	1	G	14	AF=0.5	0/0/1/1	1|0	4	0.000976562	0.000976562	LRP8
1	53778904	T	0	C	17	AF=0.5	0/0/1/1	1|0	4	1.52588e-05	1.52588e-05	LRP8
1	53793950	C	2	A	15	AF=0.5	0/0/1/1	1|0	4	0.00234985	0.00234985	AK097571
1	54257376	G	0	C	17	AF=0.5	0/0/1/1	1|0	4	1.52588e-05	1.52588e-05	NDC1
1	54261054	C	8	A	29	AF=0.5	0/0/1/1	1|0	4	0.000752897	0.000752897	NDC1
1	54264996	T	0	C	28	AF=0.5	0/0/1/1	1|0	4	7.45058e-09	7.45058e-09	NDC1
1	54272063	A	0	T	11	AF=0.5	0/0/1/1	1|0	4	0.000976562	0.000976562	NDC1
1	54278471	C	0	T	10	AF=0.5	0/0/1/1	1|0	4	0.00195312	0.00195312	NDC1
1	54281836	A	0	G	10	AF=0.5	0/0/1/1	1|0	4	0.00195312	0.00195312	NDC1
1	54320905	C	1	T	10	AF=0.5	0/0/1/1	0|1	4	0.0117188	0.0117188	YIPF1
1	54325688	T	0	C	26	AF=0.5	0/0/1/1	1|0	4	2.98023e-08	2.98023e-08	YIPF1
1	54354658	T	84	G	43	AF=0.5	0/0/1/1	1|0	4	0.000346959	0.000346959	YIPF1
1	54355041	A	117	G	32	AF=0.5	0/0/1/1	1|0	4	1.39486e-12	1.39486e-12	YIPF1
1	54355105	A	67	G	18	AF=0.5	0/0/1/1	1|0	4	8.41232e-08	8.41232e-08	YIPF1
1	54683856	C	564	G	475	AF=0.5	0/0/1/1	0|1	4	0.0063048	0.0063048	MRPL37
1	54683925	G	285	A	176	AF=0.5	0/0/1/1	0|1	4	4.35816e-07	4.35816e-07	MRPL37
1	54686374	T	0	C	28	AF=0.5	0/0/1/1	0|1	4	7.45058e-09	7.45058e-09	None
1	54689461	T	6	C	28	AF=0.5	0/0/1/1	0|1	4	0.000195126	0.000195126	None
1	54689643	A	0	G	32	AF=0.5	0/0/1/1	0|1	4	4.65661e-10	4.65661e-10	None
1	54689765	C	22	G	9	AF=0.5	0/0/1/1	0|1	4	0.0294494	0.0294494	None
1	54690037	C	0	T	26	AF=0.5	0/0/1/1	0|1	4	2.98023e-08	2.98023e-08	None
1	54690954	T	1	C	31	AF=0.5	0/0/1/1	0|1	4	1.53668e-08	1.53668e-08	None
1	54698111	T	2	A	10	AF=0.5	0/0/1/1	0|1	4	0.0385742	0.0385742	SSBP3
1	54698112	T	1	A	10	AF=0.5	0/0/1/1	0|1	4	0.0117188	0.0117188	SSBP3
1	54702869	T	0	C	13	AF=0.5	0/0/1/1	0|1	4	0.000244141	0.000244141	SSBP3
1	54740982	G	0	T	10	AF=0.5	0/0/1/1	0|1	4	0.00195312	0.00195312	SSBP3
1	54823239	C	3	G	14	AF=0.5	0/0/1/1	1|0	4	0.0127258	0.0127258	SSBP3
1	55184209	C	7	T	22	AF=0.5	0/0/1/1	1|0	4	0.00813006	0.00813006	HEATR8-TTC4, TTC4
1	55207754	C	92	G	181	AF=0.5	0/0/1/1	1|0	4	7.77569e-08	7.77569e-08	HEATR8-TTC4, TTC4
1	55221570	C	0	T	10	AF=0.5	0/0/1/1	1|0	4	0.00195312	0.00195312	None
1	55224751	C	0	A	12	AF=0.5	0/0/1/1	1|0	4	0.000488281	0.000488281	PARS2
1	55505668	C	186	T	164	AF=0.333	0/0/1	1|0	3	0.261622	1.53732e-07	PCSK9
1	55505861	G	1	A	19	AF=0.333	0/0/1	1|0	3	4.00543e-05	1.15426e-08	PCSK9
1	55505926	C	16	T	24	AF=0.333	0/0/1	1|0	3	0.268187	0.000614198	PCSK9
1	55507882	C	0	T	23	AF=0.333	0/0/1	1|0	3	2.38419e-07	1.03805e-11	PCSK9
1	55509213	G	1	C	36	AF=0.333	0/0/1	1|0	3	5.52973e-10	1.60746e-16	PCSK9
1	55509355	C	2	T	30	AF=0.333	0/0/1	1|0	3	2.46335e-07	1.07409e-12	PCSK9
1	55514158	G	5	T	22	AF=0.333	0/0/1	1|0	3	0.00151372	3.71474e-07	PCSK9
1	55518752	C	0	T	22	AF=0.667	0/1/1	0|1	3	4.76837e-07	0.000165688	PCSK9
1	55522141	A	0	G	19	AF=0.667	0/1/1	0|1	3	3.8147e-06	0.000831737	PCSK9
1	55522674	C	2	T	19	AF=0.333	0/0/1	1|0	3	0.000221252	8.29011e-08	PCSK9
1	55524197	A	89	G	78	AF=0.667	0/1/1	0|1	3	0.439129	1.51001e-07	PCSK9
1	55524237	G	74	A	92	AF=0.667	0/1/1	0|1	3	0.186854	0.0029045	PCSK9
1	55524842	G	35	A	11	AF=0.667	0/1/1	0|1	3	0.000535585	3.51934e-09	PCSK9
1	55525400	G	0	A	19	AF=0.667	0/1/1	0|1	3	3.8147e-06	0.000831737	PCSK9
1	55526296	A	25	G	10	AF=0.667	0/1/1	0|1	3	0.0166738	5.22567e-06	PCSK9
1	55527918	C	11	T	6	AF=0.667	0/1/1	0|1	3	0.332306	0.00896458	PCSK9
1	55529828	C	186	T	258	AF=0.667	0/1/1	0|1	3	0.00073516	0.000155329	PCSK9
1	55533093	C	150	T	31	AF=0.333	0/0/1	1|0	3	6.33933e-20	1.70471e-06	USP24
1	55538462	C	239	T	79	AF=0.333	0/0/1	1|0	3	7.60285e-20	0.00127779	USP24
1	55553104	A	0	C	47	AF=0.667	0/1/1	0|1	3	1.42109e-14	6.94192e-09	USP24
1	55681945	A	0	T	36	AF=0.667	0/1/1	0|1	3	2.91038e-11	8.38364e-07	LOC100507634
1	55682350	A	3	C	45	AF=0.333	0/0/1	1|0	3	1.31259e-10	1.71602e-18	LOC100507634
1	58971831	G	31	A	172	AF=0.667	0/1/1	0|1	3	7.00708e-25	9.36386e-09	DAB1, OMA1
1	58997538	G	0	A	40	AF=0.667	0/1/1	0|1	3	1.81899e-12	1.74897e-07	DAB1, OMA1
1	59009482	G	0	A	15	AF=0.333	0/0/1	1|0	3	6.10352e-05	6.86536e-08	DAB1, OMA1
1	59009563	C	0	G	17	AF=0.333	0/0/1	1|0	3	1.52588e-05	7.61293e-09	DAB1, OMA1
1	59011137	C	0	A	23	AF=0.333	0/0/1	1|0	3	2.38419e-07	1.03805e-11	DAB1, OMA1
1	59011178	T	0	C	30	AF=0.333	0/0/1	1|0	3	1.86265e-09	4.71332e-15	DAB1, OMA1
1	59011924	A	10	G	14	AF=0.333	0/0/1	1|0	3	0.541256	0.0151579	DAB1, OMA1
1	59122871	C	55	T	65	AF=0.667	0/1/1	0|1	3	0.411423	0.00477702	MYSM1
1	59123995	A	5	G	109	AF=0.667	0/1/1	0|1	3	1.4803e-26	6.5045e-14	MYSM1
1	59125319	C	57	T	157	AF=0.667	0/1/1	0|1	3	5.3554e-12	0.0420364	MYSM1
1	59125515	C	64	T	68	AF=0.667	0/1/1	0|1	3	0.794123	0.00040211	MYSM1
1	59129516	G	0	T	13	AF=0.667	0/1/1	0|1	3	0.000244141	0.00680515	MYSM1
1	59142713	T	82	C	216	AF=0.667	0/1/1	0|1	3	4.49508e-15	0.0364848	MYSM1
1	59149561	A	0	C	12	AF=0.667	0/1/1	0|1	3	0.000488281	0.0115796	MYSM1
1	59149612	C	0	G	12	AF=0.667	0/1/1	0|1	3	0.000488281	0.0115796	MYSM1
1	59149664	A	0	T	12	AF=0.667	0/1/1	0|1	3	0.000488281	0.0115796	MYSM1
1	59765491	A	0	G	16	AF=0.667	0/1/1	0|1	3	3.05176e-05	0.00231905	FGGY
1	59998227	G	0	A	10	AF=0.667	0/1/1	0|1	3	0.00195312	0.0369765	FGGY
1	60065610	C	0	G	12	AF=0.333	0/0/1	1|0	3	0.000488281	1.85922e-06	FGGY
1	60899460	G	0	A	17	AF=0.667	0/1/1	0|1	3	1.52588e-05	0.00136129	None
1	61056742	T	0	C	18	AF=0.667	0/1/1	0|1	3	7.62939e-06	0.000825895	None
1	61060172	C	0	T	10	AF=0.667	0/1/1	0|1	3	0.00195312	0.0369765	None
1	61103708	G	0	T	12	AF=0.667	0/1/1	0|1	3	0.000488281	0.0115796	None
1	61476762	C	0	T	17	AF=0.667	0/1/1	0|1	3	1.52588e-05	0.00136129	None
1	61596658	T	0	C	11	AF=0.333	0/0/1	0|1	3	0.000976562	5.58324e-06	NFIA
1	61716702	C	0	G	20	AF=0.667	0/1/1	0|1	3	1.90735e-06	0.000468994	NFIA
1	61755978	T	0	G	13	AF=0.667	0/1/1	0|1	3	0.000244141	0.00680515	NFIA
1	61815285	G	0	A	11	AF=0.667	0/1/1	0|1	3	0.000976562	0.0203885	NFIA
1	61819078	G	0	T	12	AF=0.667	0/1/1	0|1	3	0.000488281	0.0115796	NFIA
1	61842629	C	0	G	11	AF=0.667	0/1/1	0|1	3	0.000976562	0.0203885	NFIA
1	61869783	G	1	A	18	AF=0.667	0/1/1	0|1	3	7.62939e-05	0.00663068	NFIA
1	62148611	A	13	G	18	AF=0.333	0/0/1	1|0	3	0.47313	0.00643971	TM2D1
1	62165212	A	46	C	11	AF=0.333	0/0/1	1|0	3	3.31188e-06	0.0244176	TM2D1
1	62178523	T	0	C	15	AF=0.667	0/1/1	0|1	3	6.10352e-05	0.00409135	TM2D1
1	62904295	C	0	T	14	AF=0.667	0/1/1	0|1	3	0.00012207	0.00745572	USP1
1	62908538	A	1	G	13	AF=0.667	0/1/1	0|1	3	0.00183105	0.0448737	USP1
1	62915473	C	3	T	23	AF=0.667	0/1/1	0|1	3	8.79765e-05	0.0202927	USP1
1	62916796	T	84	C	256	AF=0.667	0/1/1	0|1	3	2.37146e-21	0.000667154	USP1
1	62920008	A	0	G	30	AF=0.667	0/1/1	0|1	3	1.86265e-09	6.7397e-06	None
1	63330217	G	60	A	69	AF=0.333	0/0/1	1|0	3	0.481354	3.35323e-06	ATG4C
1	63868850	T	0	C	13	AF=0.333	0/0/1	1|0	3	0.000244141	6.1912e-07	ALG6
1	63878777	T	4	A	34	AF=0.667	0/1/1	0|1	3	6.03854e-07	0.00173653	ALG6
1	63879403	A	2	G	45	AF=0.667	0/1/1	0|1	3	1.60441e-11	2.75313e-06	ALG6
1	63880552	G	12	A	5	AF=0.667	0/1/1	0|1	3	0.143463	0.00288012	ALG6
1	63890763	A	0	G	16	AF=0.667	0/1/1	0|1	3	3.05176e-05	0.00231905	ALG6
1	63891972	T	0	C	17	AF=0.333	0/0/1	1|0	3	1.52588e-05	7.61293e-09	ALG6
1	63900731	T	0	C	15	AF=0.667	0/1/1	0|1	3	6.10352e-05	0.00409135	ALG6
1	63914117	A	32	G	6	AF=0.333	0/0/1	1|0	3	2.43426e-05	0.0240974	ITGB3BP
1	63914123	A	6	G	32	AF=0.667	0/1/1	0|1	3	2.43426e-05	0.0240974	ITGB3BP
1	63915343	A	50	G	41	AF=0.667	0/1/1	0|1	3	0.401813	2.8326e-05	ITGB3BP
1	65419344	T	0	A	16	AF=0.667	0/1/1	0|1	3	3.05176e-05	0.00231905	JAK1
1	65613729	T	20	G	13	AF=0.667	0/1/1	0|1	3	0.296206	0.00141613	AK4
1	65613730	T	20	A	13	AF=0.667	0/1/1	0|1	3	0.296206	0.00141613	AK4
1	65666000	G	0	A	15	AF=0.667	0/1/1	0|1	3	6.10352e-05	0.00409135	AK4
1	65696189	T	29	G	22	AF=0.667	0/1/1	0|1	3	0.401062	0.000558737	AK4
1	65844963	A	4	G	15	AF=0.333	0/0/1	1|0	3	0.0192108	5.98543e-05	DNAJC6
1	65888854	T	0	C	19	AF=0.667	0/1/1	0|1	3	3.8147e-06	0.000831737	LEPR, LEPROT
1	65890236	C	0	T	15	AF=0.667	0/1/1	0|1	3	6.10352e-05	0.00409135	LEPR, LEPROT
1	65894069	C	10	G	35	AF=0.333	0/0/1	1|0	3	0.000247088	1.24202e-09	LEPR, LEPROT
1	65898996	C	106	T	307	AF=0.667	0/1/1	0|1	3	9.18599e-24	0.000979264	LEPR, LEPROT
1	65900357	G	124	T	107	AF=0.333	0/0/1	1|0	3	0.29245	4.63656e-05	LEPR, LEPROT
1	65943197	G	121	A	25	AF=0.333	0/0/1	1|0	3	2.63099e-16	1.44678e-05	LEPR
1	65991203	A	0	G	11	AF=0.667	0/1/1	0|1	3	0.000976562	0.0203885	LEPR
1	66077624	G	0	A	20	AF=0.333	0/0/1	1|0	3	1.90735e-06	2.81115e-10	LEPR
1	66092570	A	4	G	8	AF=0.333	0/0/1	1|0	3	0.387695	0.0263932	LEPR
1	67508531	G	0	A	13	AF=0.333	0/0/1	1|0	3	0.000244141	6.1912e-07	SLC35D1
1	67676270	C	0	T	61	AF=0.667	0/1/1	0|1	3	8.67362e-19	3.94349e-11	IL23R
1	67695044	A	0	G	12	AF=0.333	0/0/1	1|0	3	0.000488281	1.85922e-06	IL23R
1	67709155	T	0	C	10	AF=0.333	0/0/1	1|0	3	0.00195312	1.67665e-05	IL23R
1	67722894	G	0	A	13	AF=0.667	0/1/1	0|1	3	0.000244141	0.00680515	IL23R
1	67779676	A	9	G	14	AF=0.333	0/0/1	1|0	3	0.404873	0.00725583	IL12RB2
1	67827153	G	0	A	11	AF=0.667	0/1/1	0|1	3	0.000976562	0.0203885	IL12RB2
1	67857629	G	0	A	13	AF=0.667	0/1/1	0|1	3	0.000244141	0.00680515	IL12RB2
1	67861520	C	0	A	16	AF=0.667	0/1/1	0|1	3	3.05176e-05	0.00231905	IL12RB2
1	67875106	C	12	A	9	AF=0.667	0/1/1	0|1	3	0.663624	0.0339537	SERBP1
1	67875414	T	75	C	57	AF=0.667	0/1/1	0|1	3	0.138668	4.48507e-08	SERBP1
1	67876484	C	84	T	112	AF=0.667	0/1/1	0|1	3	0.0535063	0.00619995	SERBP1
1	67882684	C	0	T	23	AF=0.333	0/0/1	1|0	3	2.38419e-07	1.03805e-11	SERBP1
1	67884167	A	1	G	48	AF=0.667	0/1/1	0|1	3	1.77636e-13	1.16881e-07	SERBP1
1	67888763	A	6	G	38	AF=0.667	0/1/1	0|1	3	9.43038e-07	0.00578384	SERBP1
1	67890526	A	2	G	38	AF=0.667	0/1/1	0|1	3	1.49339e-09	3.01202e-05	SERBP1
1	67896959	G	0	T	18	AF=0.667	0/1/1	0|1	3	7.62939e-06	0.000825895	None
1	68151980	T	39	G	28	AF=0.667	0/1/1	0|1	3	0.221549	3.92635e-05	GADD45A
1	68152388	T	0	C	24	AF=0.667	0/1/1	0|1	3	1.19209e-07	9.55543e-05	GADD45A
1	68152438	C	10	T	6	AF=0.667	0/1/1	0|1	3	0.454498	0.0173614	GADD45A
1	68155632	A	0	G	29	AF=0.667	0/1/1	0|1	3	3.72529e-09	1.12887e-05	None
1	68170255	C	39	A	8	AF=0.667	0/1/1	0|1	3	5.53962e-06	3.24211e-12	GNG12
1	68946767	T	0	C	10	AF=0.667	0/1/1	0|1	3	0.00195312	0.0369765	DEPDC1
1	70019517	T	0	C	24	AF=0.333	0/0/1	1|0	3	1.19209e-07	3.4567e-12	None
1	70026531	A	0	G	20	AF=0.667	0/1/1	1|0	3	1.90735e-06	0.000468994	None
1	70033296	T	0	G	13	AF=0.667	0/1/1	1|0	3	0.000244141	0.00680515	LRRC7
1	70088591	T	0	C	11	AF=0.333	0/0/1	0|1	3	0.000976562	5.58324e-06	LRRC7
1	70611208	A	21	T	86	AF=0.667	0/1/1	1|0	3	1.60101e-10	0.00273411	LRRC40
1	70630925	G	0	C	18	AF=0.667	0/1/1	1|0	3	7.62939e-06	0.000825895	LRRC40
1	70679891	C	0	T	12	AF=0.667	0/1/1	1|0	3	0.000488281	0.0115796	SRSF11
1	70690540	C	32	T	14	AF=0.667	0/1/1	1|0	3	0.0113516	7.39791e-07	SRSF11
1	70714013	A	0	G	17	AF=0.667	0/1/1	1|0	3	1.52588e-05	0.00136129	SRSF11
1	70714622	A	9	C	12	AF=0.333	0/0/1	0|1	3	0.663624	0.0339537	SRSF11
1	70737659	C	0	T	18	AF=0.667	0/1/1	1|0	3	7.62939e-06	0.000825895	ANKRD13C
1	70820008	C	134	T	98	AF=0.667	0/1/1	1|0	3	0.0213678	2.59424e-14	ANKRD13C
1	70821757	A	0	G	27	AF=0.667	0/1/1	1|0	3	1.49012e-08	3.53136e-05	HHLA3
1	70885895	A	0	C	11	AF=0.333	0/0/1	0|1	3	0.000976562	5.58324e-06	CTH
1	70904800	G	267	T	101	AF=0.333	0/0/1	0|1	3	2.0435e-18	0.0173237	CTH
1	71471781	G	0	A	24	AF=0.667	0/1/1	1|0	3	1.19209e-07	9.55543e-05	PTGER3
1	71473791	T	31	C	96	AF=0.667	0/1/1	1|0	3	6.32744e-09	0.0378798	PTGER3
1	71477539	A	34	G	42	AF=0.667	0/1/1	1|0	3	0.422191	0.0385058	PTGER3
1	71504390	A	0	G	11	AF=0.667	0/1/1	1|0	3	0.000976562	0.0203885	PTGER3
1	74665493	G	116	A	19	AF=0.333	0/0/1	0|1	3	3.56547e-18	5.47572e-07	FPGT, FPGT-TNNI3K
1	74668896	G	4	A	9	AF=0.333	0/0/1	0|1	3	0.266846	0.0139305	FPGT, FPGT-TNNI3K
1	74670172	A	3	G	50	AF=0.667	0/1/1	1|0	3	5.51958e-12	2.69336e-06	FPGT, FPGT-TNNI3K
1	74672640	T	49	A	12	AF=0.333	0/0/1	0|1	3	1.96988e-06	0.0287454	FPGT, FPGT-TNNI3K
1	74675245	T	0	C	13	AF=0.667	0/1/1	1|0	3	0.000244141	0.00680515	FPGT-TNNI3K
1	75670877	G	15	C	3	AF=0.667	0/1/1	0|1	3	0.00753784	1.82739e-05	SLC44A5
1	75670957	G	4	A	17	AF=0.333	0/0/1	1|0	3	0.00719738	1.01016e-05	SLC44A5
1	75671215	C	33	T	7	AF=0.333	0/0/1	1|0	3	4.2277e-05	0.0425263	SLC44A5
1	75671687	T	10	C	25	AF=0.333	0/0/1	1|0	3	0.0166738	5.22567e-06	SLC44A5
1	75672134	T	4	C	35	AF=0.333	0/0/1	1|0	3	3.35316e-07	3.32343e-13	SLC44A5
1	75674858	G	1	A	10	AF=0.333	0/0/1	1|0	3	0.0117188	0.000128599	SLC44A5
1	75684529	A	0	G	17	AF=0.667	0/1/1	0|1	3	1.52588e-05	0.00136129	SLC44A5
1	75841516	G	0	A	10	AF=0.667	0/1/1	0|1	3	0.00195312	0.0369765	SLC44A5
1	76087951	C	4	A	14	AF=0.333	0/0/1	1|0	3	0.0308838	0.00014314	SLC44A5
1	76190568	C	7	T	12	AF=0.333	0/0/1	1|0	3	0.359283	0.0121329	ACADM
1	76259652	G	111	T	91	AF=0.667	0/1/1	0|1	3	0.181135	2.97066e-10	RABGGTB
1	77688227	A	10	G	15	AF=0.333	0/0/1	1|0	3	0.424356	0.00908019	None
1	77701796	C	0	T	13	AF=0.667	0/1/1	0|1	3	0.000244141	0.00680515	None
1	78029102	G	23	A	24	AF=0.333	0/0/1	1|0	3	1	0.0127477	None
1	78136880	C	0	T	21	AF=0.667	0/1/1	0|1	3	9.53674e-07	0.000274119	ZZZ3
1	78157949	G	0	A	10	AF=0.667	0/1/1	0|1	3	0.00195312	0.0369765	None
1	78201745	G	150	T	172	AF=0.667	0/1/1	0|1	3	0.241842	8.04215e-07	USP33
1	78343510	C	22	T	27	AF=0.333	0/0/1	1|0	3	0.568172	0.00207526	FAM73A
1	78412779	C	79	A	118	AF=0.667	0/1/1	0|1	3	0.00663293	0.049083	FUBP1
1	78415271	A	3	G	52	AF=0.667	0/1/1	0|1	3	1.54188e-12	1.05144e-06	FUBP1
1	78418487	A	0	G	47	AF=0.667	0/1/1	0|1	3	1.42109e-14	6.94192e-09	FUBP1
1	78418776	G	3	A	39	AF=0.667	0/1/1	0|1	3	5.63159e-09	0.000107444	FUBP1
1	78419082	C	23	A	14	AF=0.667	0/1/1	0|1	3	0.187742	0.000361318	FUBP1
1	78470151	A	0	G	12	AF=0.333	0/0/1	1|0	3	0.000488281	1.85922e-06	DNAJB4
1	78481640	G	1	A	10	AF=0.333	0/0/1	1|0	3	0.0117188	0.000128599	DNAJB4
1	78483422	T	12	A	24	AF=0.333	0/0/1	1|0	3	0.0652453	5.25019e-05	None
1	85147644	C	4	T	12	AF=0.333	0/0/1	0|1	3	0.0768127	0.000784383	SSX2IP
1	85623859	G	17	A	4	AF=0.667	0/1/1	1|0	3	0.00719738	1.01016e-05	SYDE2
1	85624006	C	26	G	14	AF=0.667	0/1/1	1|0	3	0.0806905	6.08054e-05	SYDE2
1	85633952	G	0	A	18	AF=0.667	0/1/1	1|0	3	7.62939e-06	0.000825895	SYDE2
1	85640661	T	17	C	14	AF=0.667	0/1/1	1|0	3	0.7201	0.0203061	SYDE2
1	85640794	C	2	T	19	AF=0.333	0/0/1	0|1	3	0.000221252	8.29011e-08	SYDE2
1	85641119	G	0	T	70	AF=0.667	0/1/1	1|0	3	1.69407e-21	9.55369e-13	SYDE2
1	85641435	G	0	A	19	AF=0.667	0/1/1	1|0	3	3.8147e-06	0.000831737	SYDE2
1	85666327	T	4	C	25	AF=0.667	0/1/1	1|0	3	0.000103716	0.0287403	SYDE2
1	85716979	C	2	A	21	AF=0.333	0/0/1	0|1	3	6.60419e-05	1.10252e-08	C1orf52
1	85732065	A	7	G	12	AF=0.333	0/0/1	0|1	3	0.359283	0.0121329	BCL10
1	85732941	A	27	C	32	AF=0.333	0/0/1	0|1	3	0.602923	0.00125075	BCL10
1	85741968	G	5	C	10	AF=0.333	0/0/1	0|1	3	0.301758	0.0107384	BCL10
1	86117583	T	13	C	18	AF=0.333	0/0/1	0|1	3	0.47313	0.00643971	ZNHIT6
1	86119295	A	107	G	32	AF=0.333	0/0/1	0|1	3	1.20693e-10	0.00905633	ZNHIT6
1	86119296	C	39	A	82	AF=0.333	0/0/1	1|0	3	0.000115475	1.39386e-14	ZNHIT6
1	86150378	G	0	A	28	AF=0.333	0/0/1	0|1	3	7.45058e-09	4.25049e-14	ZNHIT6
1	87207942	A	173	G	119	AF=0.333	0/0/1	0|1	3	0.00187524	0.00756867	SH3GLB1
1	87212999	A	41	G	52	AF=0.333	0/0/1	0|1	3	0.299732	7.95448e-06	SH3GLB1
1	87464470	A	0	G	11	AF=0.667	0/1/1	1|0	3	0.000976562	0.0203885	HS2ST1, LOC339524
1	87599697	G	0	A	18	AF=0.667	0/1/1	1|0	3	7.62939e-06	0.000825895	LOC339524
1	89124036	T	0	C	10	AF=0.333	0/0/1	0|1	3	0.00195312	1.67665e-05	AK123834
1	89295765	C	8	A	33	AF=0.333	0/0/1	0|1	3	0.000112221	7.36312e-10	PKN2
1	89301123	C	52	T	13	AF=0.333	0/0/1	0|1	3	1.16881e-06	0.0246388	PKN2
1	89416738	C	22	G	12	AF=0.667	0/1/1	1|0	3	0.121449	0.000195692	CCBL2
1	89418403	C	27	T	5	AF=0.667	0/1/1	1|0	3	0.000113074	3.7178e-09	CCBL2
1	89423623	T	0	A	12	AF=0.667	0/1/1	1|0	3	0.000488281	0.0115796	CCBL2
1	89447978	T	11	A	53	AF=0.667	0/1/1	1|0	3	1.00586e-07	0.00514993	CCBL2, RBMXL1
1	89503649	A	0	T	16	AF=0.667	0/1/1	1|0	3	3.05176e-05	0.00231905	None
1	89503665	G	0	A	16	AF=0.667	0/1/1	1|0	3	3.05176e-05	0.00231905	None
1	90005159	A	29	C	6	AF=0.333	0/0/1	0|1	3	0.000116842	0.0477735	LRRC8B
1	90016895	G	0	A	15	AF=0.667	0/1/1	1|0	3	6.10352e-05	0.00409135	LRRC8B
1	90036508	G	0	C	11	AF=0.333	0/0/1	0|1	3	0.000976562	5.58324e-06	LRRC8B
1	90036694	T	0	C	11	AF=0.333	0/0/1	0|1	3	0.000976562	5.58324e-06	LRRC8B
1	90036702	G	0	C	11	AF=0.333	0/0/1	0|1	3	0.000976562	5.58324e-06	LRRC8B
1	90049040	A	27	G	30	AF=0.333	0/0/1	0|1	3	0.791366	0.00288378	LRRC8B
1	90059575	G	83	T	64	AF=0.333	0/0/1	0|1	3	0.137378	0.010888	LRRC8B
1	90125355	C	0	G	29	AF=0.667	0/1/1	1|0	3	3.72529e-09	1.12887e-05	LRRC8C
1	90128858	G	0	A	11	AF=0.667	0/1/1	1|0	3	0.000976562	0.0203885	LRRC8C
1	90182591	A	32	G	9	AF=0.667	0/1/1	1|0	3	0.000430857	5.52087e-09	LRRC8C
1	90294827	A	4	G	30	AF=0.667	0/1/1	1|0	3	6.16489e-06	0.00594041	LRRC8D
1	91266786	T	0	C	21	AF=0.667	0/1/1	1|0	3	9.53674e-07	0.000274119	None
1	91305125	A	3	C	8	AF=0.333	0/0/1	0|1	3	0.226562	0.00876373	AK022898
1	91309231	A	1	G	11	AF=0.333	0/0/1	0|1	3	0.00634766	4.65475e-05	AK022898
1	91384826	G	0	A	11	AF=0.667	0/1/1	1|0	3	0.000976562	0.0203885	ZNF644
1	91772397	C	0	G	13	AF=0.667	0/1/1	1|0	3	0.000244141	0.00680515	HFM1
1	91782011	G	18	A	39	AF=0.333	0/0/1	0|1	3	0.00750818	1.04805e-07	HFM1
1	91980447	A	154	G	417	AF=0.667	0/1/1	1|0	3	5.6315e-29	0.00117942	CDC7
1	91980649	G	8	A	40	AF=0.667	0/1/1	1|0	3	3.30527e-06	0.0137837	CDC7
1	91982094	G	1	A	20	AF=0.667	0/1/1	1|0	3	2.09808e-05	0.0041343	CDC7
1	91982554	G	0	A	16	AF=0.667	0/1/1	1|0	3	3.05176e-05	0.00231905	CDC7
1	92148839	T	45	C	37	AF=0.333	0/0/1	0|1	3	0.439705	0.0259791	TGFBR3
1	92149096	C	13	T	70	AF=0.333	0/0/1	0|1	3	1.33332e-10	1.12047e-21	TGFBR3
1	92149139	C	8	T	23	AF=0.333	0/0/1	0|1	3	0.0106738	3.82592e-06	TGFBR3
1	92177938	A	64	G	59	AF=0.333	0/0/1	0|1	3	0.718509	0.000768458	TGFBR3
1	92185657	C	41	T	47	AF=0.667	0/1/1	1|0	3	0.594288	0.0123077	TGFBR3
1	92262874	T	13	C	24	AF=0.333	0/0/1	0|1	3	0.0988717	0.000142636	TGFBR3
1	92358186	G	0	C	20	AF=0.333	0/0/1	0|1	3	1.90735e-06	2.81115e-10	TGFBR3
1	92362390	G	0	T	14	AF=0.333	0/0/1	0|1	3	0.00012207	2.06167e-07	TGFBR3
1	92371722	A	0	T	31	AF=0.333	0/0/1	0|1	3	9.31323e-10	1.56954e-15	None
1	92600183	C	0	G	10	AF=0.333	0/0/1	0|1	3	0.00195312	1.67665e-05	BTBD8
1	92708916	T	0	C	14	AF=0.333	0/0/1	0/1	3	0.00012207	2.06167e-07	C1orf146
1	92738281	C	3	T	20	AF=0.667	0/1/1	1|0	3	0.000488281	0.0451487	GLMN
1	92744622	T	0	C	13	AF=0.667	0/1/1	1|0	3	0.000244141	0.00680515	GLMN
1	92746227	G	0	A	16	AF=0.667	0/1/1	1|0	3	3.05176e-05	0.00231905	GLMN
1	92747329	A	0	C	24	AF=0.667	0/1/1	1|0	3	1.19209e-07	9.55543e-05	GLMN
1	92975464	C	44	T	48	AF=0.667	0/1/1	1|0	3	0.754652	0.00391612	EVI5
1	92975493	A	40	G	43	AF=0.333	0/0/1	0|1	3	0.826405	0.000630079	EVI5
1	93073228	C	9	A	5	AF=0.667	0/1/1	1|0	3	0.42395	0.0207631	EVI5
1	93196654	G	0	A	15	AF=0.667	0/1/1	1|0	3	6.10352e-05	0.00409135	EVI5
1	93253004	C	0	T	10	AF=0.333	0/0/1	0|1	3	0.00195312	1.67665e-05	EVI5
1	93421110	C	0	T	21	AF=0.333	0/0/1	0|1	3	9.53674e-07	9.36114e-11	FAM69A
1	93616202	T	16	C	11	AF=0.667	0/1/1	1|0	3	0.442068	0.00680476	TMED5
1	93646207	T	21	C	18	AF=0.667	0/1/1	1|0	3	0.749259	0.009858	TMED5
1	93646433	T	45	C	10	AF=0.333	0/0/1	0|1	3	2.05726e-06	0.0210354	CCDC18
1	93666349	T	0	C	18	AF=0.667	0/1/1	1|0	3	7.62939e-06	0.000825895	CCDC18
1	93677269	G	0	A	14	AF=0.333	0/0/1	1|0	3	0.00012207	2.06167e-07	CCDC18
1	93683210	A	0	G	18	AF=0.333	0/0/1	0|1	3	7.62939e-06	2.53511e-09	CCDC18
1	93711782	T	11	A	3	AF=0.667	0/1/1	1|0	3	0.057373	0.000684325	CCDC18
1	93713917	G	0	A	15	AF=0.333	0/0/1	0|1	3	6.10352e-05	6.86536e-08	CCDC18
1	93720070	C	95	G	29	AF=0.333	0/0/1	0|1	3	2.20464e-09	0.0217685	CCDC18
1	93728648	G	39	C	8	AF=0.333	0/0/1	0|1	3	5.53962e-06	0.0193246	CCDC18
1	93728758	T	35	A	7	AF=0.333	0/0/1	0|1	3	1.50972e-05	0.021581	CCDC18
1	93756192	G	0	A	10	AF=0.333	0/0/1	0|1	3	0.00195312	1.67665e-05	None
1	93768768	C	0	T	12	AF=0.333	0/0/1	0|1	3	0.000488281	1.85922e-06	None
1	93790294	G	4	A	28	AF=0.333	0/0/1	0|1	3	1.93012e-05	3.24432e-10	LOC100131564
1	93790405	T	4	C	28	AF=0.333	0/0/1	0|1	3	1.93012e-05	3.24432e-10	LOC100131564
1	93799239	A	17	G	5	AF=0.667	0/1/1	1|0	3	0.0169005	3.05531e-05	LOC100131564
1	93801092	C	28	T	10	AF=0.667	0/1/1	1|0	3	0.00509764	6.28206e-07	LOC100131564
1	93802264	T	57	A	72	AF=0.667	0/1/1	1|0	3	0.217561	0.0113503	LOC100131564
1	93802781	G	2	A	36	AF=0.667	0/1/1	1|0	3	5.39876e-09	8.29697e-05	LOC100131564
1	93811569	A	93	G	138	AF=0.667	0/1/1	1|0	3	0.00369847	0.0301955	DR1
1	93811917	C	257	T	96	AF=0.333	0/0/1	0|1	3	4.25936e-18	0.0150907	DR1
1	93829248	C	0	G	66	AF=0.667	0/1/1	1|0	3	2.71051e-20	4.52474e-12	None
1	94341137	C	48	T	10	AF=0.333	0/0/1	1|0	3	4.51662e-07	0.00798113	DNTTIP2
1	94341267	A	410	G	123	AF=0.333	0/0/1	1|0	3	4.61505e-37	3.01566e-07	DNTTIP2
1	94342564	C	343	A	76	AF=0.333	0/0/1	1|0	3	1.3828e-41	5.00389e-12	DNTTIP2
1	94344716	C	261	T	166	AF=0.333	0/0/1	1|0	3	4.95283e-06	0.0157671	DNTTIP2
1	94930345	G	87	A	23	AF=0.333	0/0/1	1|0	3	6.04117e-10	0.00602143	ABCD3
1	95467107	A	0	C	28	AF=0.667	0/1/1	0|1	3	7.45058e-09	1.95933e-05	ALG14
1	95611420	A	0	G	26	AF=0.667	0/1/1	0|1	3	2.98023e-08	3.33595e-05	TMEM56, TMEM56-RWDD3
1	95660556	A	74	G	88	AF=0.667	0/1/1	0|1	3	0.307067	0.00110204	AK090700, TMEM56, TMEM56-RWDD3
1	95660921	C	26	G	17	AF=0.667	0/1/1	0|1	3	0.222053	0.000285787	AK090700, TMEM56, TMEM56-RWDD3
1	95661200	G	25	A	115	AF=0.667	0/1/1	0|1	3	5.40818e-15	6.7735e-05	AK090700, TMEM56, TMEM56-RWDD3
1	95710521	C	2	T	13	AF=0.333	0/0/1	1|0	3	0.00738525	3.10525e-05	RWDD3
1	95710626	G	24	A	10	AF=0.667	0/1/1	0|1	3	0.0243065	1.08438e-05	RWDD3
1	97248246	T	0	C	15	AF=0.667	0/1/1	0|1	3	6.10352e-05	0.00409135	PTBP2
1	97252941	G	0	C	11	AF=0.667	0/1/1	0|1	3	0.000976562	0.0203885	PTBP2
1	97265741	T	0	C	10	AF=0.667	0/1/1	0|1	3	0.00195312	0.0369765	PTBP2
1	97273313	A	0	T	12	AF=0.667	0/1/1	0|1	3	0.000488281	0.0115796	PTBP2
1	97273332	G	0	A	12	AF=0.667	0/1/1	0|1	3	0.000488281	0.0115796	PTBP2
1	97279692	C	38	T	126	AF=0.667	0/1/1	0|1	3	3.21459e-12	0.00607054	PTBLP, PTBP2
1	100170502	T	24	C	28	AF=0.333	0/0/1	1|0	3	0.677809	0.0028388	None
1	100336361	C	8	T	18	AF=0.333	0/0/1	1|0	3	0.0755187	0.000221127	AGL
1	100547994	T	79	C	96	AF=0.667	0/1/1	0|1	3	0.226375	0.00126799	HIAT1
1	100575933	G	117	A	82	AF=0.667	0/1/1	0|1	3	0.015731	2.35643e-13	SASS6
1	100728920	C	0	T	12	AF=0.667	0/1/1	0|1	3	0.000488281	0.0115796	None
1	100730282	G	45	A	8	AF=0.667	0/1/1	0|1	3	2.36835e-07	1.22882e-14	None
1	100731300	G	0	C	10	AF=0.667	0/1/1	0|1	3	0.00195312	0.0369765	None
1	100732681	A	0	G	20	AF=0.667	0/1/1	0|1	3	1.90735e-06	0.000468994	RTCA
1	100744650	A	10	G	6	AF=0.667	0/1/1	0|1	3	0.454498	0.0173614	RTCA
1	100744798	G	1	A	18	AF=0.667	0/1/1	0|1	3	7.62939e-05	0.00663068	RTCA
1	100754434	A	3	G	10	AF=0.333	0/0/1	1|0	3	0.0922852	0.00163342	RTCA
1	100758155	T	0	C	34	AF=0.667	0/1/1	0|1	3	1.16415e-10	1.36636e-06	RTCA
1	100939777	T	0	C	12	AF=0.667	0/1/1	0|1	3	0.000488281	0.0115796	CDC14A
1	100970346	T	12	C	9	AF=0.667	0/1/1	0|1	3	0.663624	0.0339537	CDC14A
1	101330984	G	0	A	19	AF=0.667	0/1/1	0|1	3	3.8147e-06	0.000831737	None
1	101338324	T	124	C	135	AF=0.667	0/1/1	0|1	3	0.534438	1.26633e-06	EXTL2
1	101338482	A	76	G	89	AF=0.667	0/1/1	0|1	3	0.350234	0.000677084	EXTL2
1	101342650	T	0	A	15	AF=0.667	0/1/1	0|1	3	6.10352e-05	0.00409135	EXTL2
1	101393409	A	0	G	11	AF=0.333	0/0/1	1|0	3	0.000976562	5.58324e-06	SLC30A7
1	101442211	T	10	C	23	AF=0.333	0/0/1	1|0	3	0.035082	2.25363e-05	SLC30A7
1	101486061	C	6	T	22	AF=0.333	0/0/1	1|0	3	0.00371917	1.18399e-06	DPH5
1	101489461	A	14	T	16	AF=0.333	0/0/1	1|0	3	0.855536	0.0309569	DPH5
1	101490329	T	4	G	23	AF=0.333	0/0/1	1|0	3	0.000310749	3.92448e-08	DPH5
1	101543389	G	4	T	9	AF=0.333	0/0/1	1|0	3	0.266846	0.0139305	BC045807, BX538249
1	101545482	G	0	A	15	AF=0.333	0/0/1	1|0	3	6.10352e-05	6.86536e-08	BC045807, BX538249
1	106172488	G	0	A	11	AF=0.333	0/0/1	0|1	3	0.000976562	5.58324e-06	None
1	107599002	A	0	C	19	AF=0.5	0/0/1/1	1|0	4	3.8147e-06	3.8147e-06	None
1	107599258	A	1	T	10	AF=0.5	0/0/1/1	0|1	4	0.0117188	0.0117188	None
1	107599918	C	171	T	64	AF=0.5	0/0/1/1	0|1	4	1.93782e-12	1.93782e-12	PRMT6
1	108713557	T	0	G	13	AF=0.5	0/0/1/1	0|1	4	0.000244141	0.000244141	SLC25A24
1	108716399	T	0	C	12	AF=0.5	0/0/1/1	1|0	4	0.000488281	0.000488281	SLC25A24
1	108728484	T	69	C	97	AF=0.5	0/0/1/1	1|0	4	0.035799	0.035799	SLC25A24
1	108739214	T	0	C	30	AF=0.5	0/0/1/1	1|0	4	1.86265e-09	1.86265e-09	SLC25A24
1	108739228	A	0	C	30	AF=0.25	0/0/0/1	1|0	4	1.86265e-09	8.67362e-19	SLC25A24
1	108854166	G	16	A	5	AF=0.5	0/0/1/1	0|1	4	0.0266037	0.0266037	None
1	108854245	C	0	T	25	AF=0.5	0/0/1/1	0|1	4	5.96046e-08	5.96046e-08	None
1	108868263	G	0	T	16	AF=0.5	0/0/1/1	0|1	4	3.05176e-05	3.05176e-05	None
1	108868419	T	3	C	27	AF=0.5	0/0/1/1	0|1	4	8.43033e-06	8.43033e-06	None
1	108870158	T	2	C	12	AF=0.5	0/0/1/1	0|1	4	0.0129395	0.0129395	None
1	109324694	A	1	G	26	AF=0.5	0/0/1/1	1|0	4	4.17233e-07	4.17233e-07	STXBP3
1	109446750	G	161	A	91	AF=0.5	0/0/1/1	1|0	4	1.22532e-05	1.22532e-05	AKNAD1, GPSM2
1	109457510	G	0	A	10	AF=0.5	0/0/1/1	0|1	4	0.00195312	0.00195312	AKNAD1, GPSM2
1	109462439	C	0	T	17	AF=0.5	0/0/1/1	0|1	4	1.52588e-05	1.52588e-05	AKNAD1, GPSM2
1	109462572	G	2	C	30	AF=0.5	0/0/1/1	0|1	4	2.46335e-07	2.46335e-07	AKNAD1, GPSM2
1	109468120	C	13	G	4	AF=0.5	0/0/1/1	0|1	4	0.0490417	0.0490417	AKNAD1, GPSM2
1	109468708	G	5	A	20	AF=0.5	0/0/1/1	0|1	4	0.00407732	0.00407732	AKNAD1, GPSM2
1	109470126	A	50	G	24	AF=0.5	0/0/1/1	0|1	4	0.00337223	0.00337223	AKNAD1, GPSM2
1	109470185	T	122	C	58	AF=0.5	0/0/1/1	0|1	4	2.09884e-06	2.09884e-06	AKNAD1, GPSM2
1	109470268	G	107	A	66	AF=0.5	0/0/1/1	0|1	4	0.00226217	0.00226217	AKNAD1, GPSM2
1	109470269	C	106	T	66	AF=0.5	0/0/1/1	0|1	4	0.00283363	0.00283363	AKNAD1, GPSM2
1	109470660	G	22	A	75	AF=0.5	0/0/1/1	0|1	4	6.07339e-08	6.07339e-08	AKNAD1, GPSM2
1	109473017	C	28	T	60	AF=0.5	0/0/1/1	0|1	4	0.000846496	0.000846496	AKNAD1, CLCC1, GPSM2
1	109473826	G	98	A	61	AF=0.5	0/0/1/1	0|1	4	0.00415847	0.00415847	AKNAD1, CLCC1, GPSM2
1	109474221	C	15	T	58	AF=0.5	0/0/1/1	0|1	4	4.0932e-07	4.0932e-07	AKNAD1, CLCC1, GPSM2
1	109476780	C	47	T	110	AF=0.5	0/0/1/1	0|1	4	5.34215e-07	5.34215e-07	AKNAD1, CLCC1, GPSM2
1	109499026	G	4	C	30	AF=0.5	0/0/1/1	0|1	4	6.16489e-06	6.16489e-06	AKNAD1, CLCC1
1	109513274	A	2	G	10	AF=0.5	0/0/1/1	0|1	4	0.0385742	0.0385742	WDR47
1	109606364	T	34	G	9	AF=0.5	0/0/1/1	0|1	4	0.000170155	0.000170155	None
1	109635984	C	0	T	20	AF=0.5	0/0/1/1	0|1	4	1.90735e-06	1.90735e-06	TMEM167B
1	109643380	G	6	C	26	AF=0.5	0/0/1/1	0|1	4	0.000535053	0.000535053	None
1	109644941	G	2	A	25	AF=0.5	0/0/1/1	0|1	4	5.64754e-06	5.64754e-06	None
1	109645250	C	3	T	12	AF=0.5	0/0/1/1	0|1	4	0.0351562	0.0351562	None
1	109648870	C	0	G	17	AF=0.5	0/0/1/1	0|1	4	1.52588e-05	1.52588e-05	C1orf194
1	109649048	T	0	A	18	AF=0.5	0/0/1/1	0|1	4	7.62939e-06	7.62939e-06	C1orf194
1	109649053	T	0	C	18	AF=0.5	0/0/1/1	0|1	4	7.62939e-06	7.62939e-06	C1orf194
1	109758657	G	212	T	91	AF=0.25	0/0/0/1	0/1	4	2.79904e-12	0.0464805	SARS
1	109806834	C	14	T	49	AF=0.5	0/0/1/1	0|1	4	1.1123e-05	1.1123e-05	CELSR2
1	109807099	G	16	A	64	AF=0.5	0/0/1/1	0|1	4	5.87133e-08	5.87133e-08	CELSR2
1	109810183	C	64	T	17	AF=0.5	0/0/1/1	0|1	4	1.42664e-07	1.42664e-07	CELSR2
1	109825591	C	23	T	44	AF=0.5	0/0/1/1	1|0	4	0.0139339	0.0139339	PSRC1
1	109856306	G	141	A	92	AF=0.5	0/0/1/1	0|1	4	0.00160644	0.00160644	SORT1
1	109860144	T	0	C	10	AF=0.5	0/0/1/1	0|1	4	0.00195312	0.00195312	SORT1
1	109897103	A	110	G	152	AF=0.5	0/0/1/1	0|1	4	0.0111683	0.0111683	SORT1
1	109926828	T	0	C	12	AF=0.5	0/0/1/1	0|1	4	0.000488281	0.000488281	SORT1
1	109935325	C	0	T	12	AF=0.5	0/0/1/1	0|1	4	0.000488281	0.000488281	SORT1
1	109935427	A	1	G	13	AF=0.5	0/0/1/1	0|1	4	0.00183105	0.00183105	SORT1
1	109951711	T	26	C	56	AF=0.5	0/0/1/1	0|1	4	0.00122038	0.00122038	PSMA5
1	109958035	T	0	C	16	AF=0.5	0/0/1/1	0|1	4	3.05176e-05	3.05176e-05	PSMA5
1	109960270	C	0	A	13	AF=0.5	0/0/1/1	0|1	4	0.000244141	0.000244141	PSMA5
1	109966718	A	1	C	9	AF=0.5	0/0/1/1	0|1	4	0.0214844	0.0214844	FW340027, PSMA5
1	109968410	A	1	C	18	AF=0.5	0/0/1/1	0|1	4	7.62939e-05	7.62939e-05	PSMA5
1	110023610	G	0	A	18	AF=0.5	0/0/1/1	1|0	4	7.62939e-06	7.62939e-06	SYPL2
1	110136458	A	57	G	17	AF=0.5	0/0/1/1	0|1	4	3.39717e-06	3.39717e-06	GNAI3
1	110170896	T	35	C	66	AF=0.5	0/0/1/1	0|1	4	0.00265379	0.00265379	AMPD2
1	110174205	C	95	T	30	AF=0.5	0/0/1/1	0|1	4	4.65998e-09	4.65998e-09	AMPD2
1	110200360	T	9	C	53	AF=0.5	0/0/1/1	1|0	4	1.05072e-08	1.05072e-08	GSTM2, GSTM4
1	110201126	A	0	G	12	AF=0.5	0/0/1/1	1|0	4	0.000488281	0.000488281	GSTM2, GSTM4
1	110376138	A	0	G	11	AF=0.5	0/0/1/1	0|1	4	0.000976562	0.000976562	None
1	110438926	C	0	T	16	AF=0.5	0/0/1/1	0|1	4	3.05176e-05	3.05176e-05	None
1	110451205	C	0	A	14	AF=0.5	0/0/1/1	0|1	4	0.00012207	0.00012207	None
1	110585137	A	0	G	19	AF=0.5	0/0/1/1	1|0	4	3.8147e-06	3.8147e-06	STRIP1
1	110585264	G	0	A	31	AF=0.5	0/0/1/1	1|0	4	9.31323e-10	9.31323e-10	STRIP1
1	110586942	C	46	A	31	AF=0.25	0/0/0/1	0|1	4	0.110016	0.00344194	STRIP1
1	110770153	C	7	G	19	AF=0.5	0/0/1/1	1|0	4	0.0289593	0.0289593	KCNC4
1	110778059	A	0	G	12	AF=0.5	0/0/1/1	0|1	4	0.000488281	0.000488281	None
1	110936383	A	0	C	10	AF=0.5	0/0/1/1	1|0	4	0.00195312	0.00195312	None
1	111415841	G	400	A	655	AF=0.5	0/0/1/1	0|1	4	3.90413e-15	3.90413e-15	CD53
1	111488573	T	31	C	15	AF=0.5	0/0/1/1	1|0	4	0.0258961	0.0258961	None
1	111686497	A	0	C	32	AF=0.5	0/0/1/1	1|0	4	4.65661e-10	4.65661e-10	CEPT1
1	111726869	G	87	A	148	AF=0.5	0/0/1/1	1|0	4	8.34306e-05	8.34306e-05	CEPT1
1	111966291	C	0	T	20	AF=0.5	0/0/1/1	1|0	4	1.90735e-06	1.90735e-06	OVGP1
1	111978032	G	0	A	11	AF=0.5	0/0/1/1	0|1	4	0.000976562	0.000976562	None
1	111982294	C	31	T	11	AF=0.5	0/0/1/1	0|1	4	0.00288725	0.00288725	None
1	111982604	T	6	A	28	AF=0.5	0/0/1/1	1|0	4	0.000195126	0.000195126	WDR77
1	111983152	A	229	G	177	AF=0.5	0/0/1/1	0|1	4	0.0112797	0.0112797	WDR77
1	111990736	G	6	A	27	AF=0.5	0/0/1/1	1|0	4	0.000324063	0.000324063	WDR77
1	111993341	G	38	A	20	AF=0.5	0/0/1/1	0|1	4	0.024746	0.024746	ATP5F1
1	111993963	G	9	C	55	AF=0.5	0/0/1/1	1|0	4	3.54222e-09	3.54222e-09	ATP5F1
1	111994028	G	30	C	55	AF=0.5	0/0/1/1	1|0	4	0.00883621	0.00883621	ATP5F1
1	111996558	G	15	A	45	AF=0.5	0/0/1/1	1|0	4	0.000134514	0.000134514	ATP5F1
1	111997063	G	52	T	22	AF=0.5	0/0/1/1	1|0	4	0.000642807	0.000642807	ATP5F1
1	112005451	C	0	A	28	AF=0.5	0/0/1/1	1|0	4	7.45058e-09	7.45058e-09	None
1	112005509	G	0	T	12	AF=0.5	0/0/1/1	1|0	4	0.000488281	0.000488281	None
1	112008135	A	22	G	6	AF=0.5	0/0/1/1	1|0	4	0.00371917	0.00371917	None
1	112012365	G	0	A	10	AF=0.5	0/0/1/1	0|1	4	0.00195312	0.00195312	None
1	112145503	T	0	C	14	AF=0.5	0/0/1/1	0|1	4	0.00012207	0.00012207	LOC100129269, RAP1A
1	112164833	C	0	T	12	AF=0.5	0/0/1/1	0|1	4	0.000488281	0.000488281	RAP1A
1	112220945	A	0	G	19	AF=0.5	0/0/1/1	0|1	4	3.8147e-06	3.8147e-06	RAP1A
1	112242692	T	0	C	10	AF=0.5	0/0/1/1	0|1	4	0.00195312	0.00195312	RAP1A
1	112253766	T	1	A	13	AF=0.5	0/0/1/1	0|1	4	0.00183105	0.00183105	RAP1A
1	113084146	G	0	A	11	AF=0.5	0/0/1/1	0|1	4	0.000976562	0.000976562	ST7L
1	113113721	G	0	A	11	AF=0.5	0/0/1/1	0|1	4	0.000976562	0.000976562	ST7L
1	113163042	C	0	A	12	AF=0.5	0/0/1/1	1|0	4	0.000488281	0.000488281	CAPZA1
1	113163967	T	0	C	15	AF=0.5	0/0/1/1	1|0	4	6.10352e-05	6.10352e-05	CAPZA1
1	113197969	C	0	T	15	AF=0.5	0/0/1/1	1|0	4	6.10352e-05	6.10352e-05	CAPZA1
1	113202417	G	0	A	26	AF=0.5	0/0/1/1	1|0	4	2.98023e-08	2.98023e-08	CAPZA1
1	113206502	G	0	C	10	AF=0.5	0/0/1/1	0|1	4	0.00195312	0.00195312	CAPZA1
1	113214097	G	1299	A	855	AF=0.5	0/0/1/1	1|0	4	9.80827e-22	9.80827e-22	CAPZA1
1	113219388	A	4	T	20	AF=0.5	0/0/1/1	1|0	4	0.00154388	0.00154388	MOV10
1	113236421	G	10	A	26	AF=0.5	0/0/1/1	1|0	4	0.011331	0.011331	MOV10
1	113456546	A	458	T	373	AF=0.5	0/0/1/1	0|1	4	0.00354409	0.00354409	SLC16A1
1	113492909	T	6	C	26	AF=0.5	0/0/1/1	0|1	4	0.000535053	0.000535053	SLC16A1
1	113509091	C	0	A	10	AF=0.5	0/0/1/1	1|0	4	0.00195312	0.00195312	BC047723, BX648855
1	113648601	C	0	G	13	AF=0.5	0/0/1/1	0|1	4	0.000244141	0.000244141	LRIG2
1	113651577	C	0	T	13	AF=0.5	0/0/1/1	0|1	4	0.000244141	0.000244141	LRIG2
1	113662249	G	0	C	19	AF=0.5	0/0/1/1	0|1	4	3.8147e-06	3.8147e-06	LRIG2
1	113667837	T	6	G	21	AF=0.5	0/0/1/1	1|0	4	0.00592461	0.00592461	None
1	113668998	C	35	G	11	AF=0.5	0/0/1/1	0|1	4	0.000535585	0.000535585	None
1	113669895	G	0	A	14	AF=0.5	0/0/1/1	1|0	4	0.00012207	0.00012207	None
1	113672827	A	2	G	55	AF=0.5	0/0/1/1	1|0	4	2.29539e-14	2.29539e-14	None
1	113674649	T	32	G	70	AF=0.5	0/0/1/1	1|0	4	0.000213391	0.000213391	None
1	114288280	G	0	T	13	AF=0.5	0/0/1/1	0|1	4	0.000244141	0.000244141	PHTF1
1	114291406	G	5	A	27	AF=0.5	0/0/1/1	0|1	4	0.000113074	0.000113074	PHTF1
1	114292544	C	0	T	17	AF=0.5	0/0/1/1	0|1	4	1.52588e-05	1.52588e-05	PHTF1
1	114301335	C	82	T	47	AF=0.25	0/0/0/1	1|0	4	0.00261833	0.00418249	PHTF1
1	114354654	T	16	C	38	AF=0.5	0/0/1/1	0|1	4	0.00383827	0.00383827	RSBN1
1	114398774	C	0	A	22	AF=0.5	0/0/1/1	0|1	4	4.76837e-07	4.76837e-07	PTPN22
1	114445880	G	42	A	12	AF=0.5	0/0/1/1	1|0	4	5.20945e-05	5.20945e-05	AP4B1
1	114448389	C	92	T	59	AF=0.5	0/0/1/1	1|0	4	0.00898662	0.00898662	DCLRE1B
1	114473083	G	0	A	18	AF=0.5	0/0/1/1	0|1	4	7.62939e-06	7.62939e-06	HIPK1
1	114505000	G	161	A	99	AF=0.5	0/0/1/1	0|1	4	0.000144971	0.000144971	HIPK1
1	114506675	C	0	A	11	AF=0.5	0/0/1/1	0|1	4	0.000976562	0.000976562	HIPK1
1	114512277	A	3	G	13	AF=0.5	0/0/1/1	0|1	4	0.0212708	0.0212708	HIPK1
1	114512677	C	209	G	82	AF=0.5	0/0/1/1	0|1	4	6.00294e-14	6.00294e-14	HIPK1
1	114515717	G	25	A	56	AF=0.5	0/0/1/1	1|0	4	0.000752126	0.000752126	HIPK1
1	114519351	T	108	G	165	AF=0.5	0/0/1/1	1|0	4	0.000673141	0.000673141	HIPK1
1	114936079	T	141	A	51	AF=0.5	0/0/1/1	0|1	4	5.94769e-11	5.94769e-11	TRIM33
1	114938289	T	39	G	18	AF=0.5	0/0/1/1	0|1	4	0.00750818	0.00750818	TRIM33
1	114953420	T	2	C	12	AF=0.5	0/0/1/1	0|1	4	0.0129395	0.0129395	TRIM33
1	114973429	T	50	C	73	AF=0.5	0/0/1/1	0|1	4	0.0468501	0.0468501	TRIM33
1	115047484	A	0	C	10	AF=0.5	0/0/1/1	0|1	4	0.00195312	0.00195312	TRIM33
1	115047549	G	0	A	10	AF=0.5	0/0/1/1	0|1	4	0.00195312	0.00195312	TRIM33
1	115052665	T	12	A	32	AF=0.5	0/0/1/1	0|1	4	0.00365777	0.00365777	TRIM33
1	115262124	G	13	A	39	AF=0.5	0/0/1/1	1|0	4	0.000409541	0.000409541	CSDE1
1	115283197	A	2	G	17	AF=0.5	0/0/1/1	1|0	4	0.000728607	0.000728607	CSDE1
1	115284056	G	0	T	14	AF=0.5	0/0/1/1	1|0	4	0.00012207	0.00012207	CSDE1
1	116184619	G	54	C	30	AF=0.5	0/0/1/1	0|1	4	0.0116345	0.0116345	VANGL1
1	116184621	C	54	A	32	AF=0.5	0/0/1/1	0|1	4	0.0229826	0.0229826	VANGL1
1	116234505	A	9	G	44	AF=0.5	0/0/1/1	0|1	4	1.22085e-06	1.22085e-06	VANGL1
1	116239633	T	25	G	6	AF=0.5	0/0/1/1	0|1	4	0.00087791	0.00087791	VANGL1
1	116920952	G	20	C	5	AF=0.5	0/0/1/1	1|0	4	0.00407732	0.00407732	ATP1A1
1	116932563	T	12	A	26	AF=0.5	0/0/1/1	1|0	4	0.0335524	0.0335524	ATP1A1
1	116932921	G	824	A	914	AF=0.5	0/0/1/1	1|0	4	0.0327444	0.0327444	ATP1A1
1	116944882	G	5	A	24	AF=0.5	0/0/1/1	1|0	4	0.000546113	0.000546113	ATP1A1, ATP1A1OS
1	116945036	T	1	C	28	AF=0.5	0/0/1/1	1|0	4	1.11759e-07	1.11759e-07	ATP1A1, ATP1A1OS
1	116945161	T	0	G	43	AF=0.5	0/0/1/1	1|0	4	2.27374e-13	2.27374e-13	ATP1A1, ATP1A1OS
1	116946469	C	4	T	16	AF=0.5	0/0/1/1	1|0	4	0.0118179	0.0118179	ATP1A1, ATP1A1OS
1	116946635	T	0	C	17	AF=0.5	0/0/1/1	1|0	4	1.52588e-05	1.52588e-05	ATP1A1, ATP1A1OS
1	116947084	C	1185	T	902	AF=0.5	0/0/1/1	1|0	4	6.32596e-10	6.32596e-10	ATP1A1, ATP1A1OS
1	117199884	A	0	C	15	AF=0.5	0/0/1/1	1|0	4	6.10352e-05	6.10352e-05	IGSF3
1	117529458	G	76	A	39	AF=0.5	0/0/1/1	0|1	4	0.000717191	0.000717191	PTGFRN
1	117530273	A	40	G	12	AF=0.5	0/0/1/1	0|1	4	0.000127539	0.000127539	PTGFRN
1	117530507	C	95	T	57	AF=0.5	0/0/1/1	0|1	4	0.00257357	0.00257357	PTGFRN
1	117530511	C	101	T	55	AF=0.5	0/0/1/1	0|1	4	0.000287109	0.000287109	PTGFRN
1	117531620	G	86	A	39	AF=0.5	0/0/1/1	0|1	4	3.17761e-05	3.17761e-05	PTGFRN
1	117531911	A	27	G	57	AF=0.5	0/0/1/1	0|1	4	0.00140449	0.00140449	PTGFRN
1	117532798	C	37	G	77	AF=0.25	0/0/0/1	0|1	4	0.000226811	1.57615e-21	PTGFRN
1	117596187	A	0	C	12	AF=0.5	0/0/1/1	1|0	4	0.000488281	0.000488281	None
1	117617588	G	60	A	113	AF=0.5	0/0/1/1	1|0	4	6.82516e-05	6.82516e-05	TTF2
1	117617705	A	52	G	234	AF=0.5	0/0/1/1	1|0	4	9.81803e-29	9.81803e-29	TTF2
1	117618067	C	90	T	184	AF=0.5	0/0/1/1	1|0	4	1.40421e-08	1.40421e-08	TTF2
1	117630533	T	30	C	12	AF=0.5	0/0/1/1	0|1	4	0.0079159	0.0079159	TTF2
1	117644599	A	62	G	104	AF=0.5	0/0/1/1	1|0	4	0.00138805	0.00138805	TTF2
1	117653282	A	0	G	13	AF=0.5	0/0/1/1	0|1	4	0.000244141	0.000244141	None
1	117653380	G	0	A	13	AF=0.5	0/0/1/1	0|1	4	0.000244141	0.000244141	None
1	117656088	A	0	G	32	AF=0.5	0/0/1/1	0|1	4	4.65661e-10	4.65661e-10	TRIM45
1	117660754	C	16	T	42	AF=0.5	0/0/1/1	0|1	4	0.000861782	0.000861782	TRIM45
1	117663913	C	44	T	11	AF=0.5	0/0/1/1	1|0	4	8.69937e-06	8.69937e-06	TRIM45
1	117909041	G	24	A	9	AF=0.5	0/0/1/1	1|0	4	0.013531	0.013531	None
1	117910682	G	100	A	34	AF=0.5	0/0/1/1	1|0	4	9.92011e-09	9.92011e-09	MAN1A2
1	117911833	G	0	A	12	AF=0.5	0/0/1/1	1|0	4	0.000488281	0.000488281	MAN1A2
1	117911838	T	0	G	12	AF=0.5	0/0/1/1	1|0	4	0.000488281	0.000488281	MAN1A2
1	118011751	T	0	C	10	AF=0.5	0/0/1/1	1|0	4	0.00195312	0.00195312	MAN1A2
1	118065202	T	0	A	11	AF=0.5	0/0/1/1	1|0	4	0.000976562	0.000976562	MAN1A2
1	118069830	A	41	G	16	AF=0.5	0/0/1/1	1|0	4	0.00126356	0.00126356	None
1	119469188	G	0	T	13	AF=0.5	0/0/1/1	0|1	4	0.000244141	0.000244141	TBX15
1	119574074	G	71	C	37	AF=0.5	0/0/1/1	0|1	4	0.00138164	0.00138164	WARS2
1	119574587	C	35	T	19	AF=0.5	0/0/1/1	0|1	4	0.0402236	0.0402236	WARS2
1	119687212	A	0	G	12	AF=0.5	0/0/1/1	0|1	4	0.000488281	0.000488281	AK125759, BC034623, BC043601, BC063600
1	119700465	C	0	G	10	AF=0.5	0/0/1/1	1|0	4	0.00195312	0.00195312	AK125759, BC034623, BC043601
1	119712759	T	13	C	4	AF=0.5	0/0/1/1	1|0	4	0.0490417	0.0490417	AK125759, BC034623, BC043601
1	119721808	C	5	T	17	AF=0.5	0/0/1/1	1|0	4	0.0169005	0.0169005	AK125759, BC034623, BC043601
1	119722778	A	23	G	69	AF=0.5	0/0/1/1	1|0	4	1.67044e-06	1.67044e-06	AK125759, BC034623, BC043601
1	119725525	C	60	T	27	AF=0.5	0/0/1/1	1|0	4	0.000524355	0.000524355	AK125759, BC034623, BC043601
1	119725624	G	54	A	27	AF=0.5	0/0/1/1	0|1	4	0.00359635	0.00359635	AK125759, BC034623, BC043601
1	120162787	T	65	C	12	AF=0.5	0/0/1/1	0|1	4	5.91771e-10	5.91771e-10	ZNF697
1	120163675	G	11	A	24	AF=0.5	0/0/1/1	0|1	4	0.0409596	0.0409596	ZNF697
1	120164738	C	62	T	17	AF=0.5	0/0/1/1	0|1	4	3.58836e-07	3.58836e-07	ZNF697
1	120165135	G	89	T	32	AF=0.5	0/0/1/1	0|1	4	2.14992e-07	2.14992e-07	ZNF697
1	120165187	G	76	A	20	AF=0.5	0/0/1/1	0|1	4	7.31937e-09	7.31937e-09	ZNF697
1	120165826	C	0	T	41	AF=0.25	0/0/0/1	0|1	4	9.09495e-13	2.06795e-25	ZNF697
1	120269991	C	0	G	29	AF=0.5	0/0/1/1	0|1	4	3.72529e-09	3.72529e-09	PHGDH
1	120284669	A	3	T	19	AF=0.5	0/0/1/1	0|1	4	0.000855446	0.000855446	PHGDH
1	120284988	T	21	C	8	AF=0.5	0/0/1/1	0|1	4	0.0241195	0.0241195	PHGDH
1	120285546	G	117	A	193	AF=0.5	0/0/1/1	0|1	4	1.87083e-05	1.87083e-05	PHGDH
1	120533192	C	0	T	10	AF=0.5	0/0/1/1	0/1	4	0.00195312	0.00195312	NOTCH2
1	144841106	T	0	C	13	AF=0.667	0/1/1	1|0	3	0.000244141	0.00680515	LOC100288142, LOC653513, NBPF9, PDE4DIP
1	144858090	T	11	G	4	AF=0.667	0/1/1	1|0	3	0.118469	0.0017905	LOC100288142, LOC653513, NBPF9, PDE4DIP
1	144858490	G	2	T	19	AF=0.333	0/0/1	0/1	3	0.000221252	8.29011e-08	LOC100288142, LOC653513, NBPF9, PDE4DIP
1	144858510	G	0	A	19	AF=0.667	0/1/1	1|0	3	3.8147e-06	0.000831737	LOC100288142, LOC653513, NBPF9, PDE4DIP
1	144858537	G	0	T	23	AF=0.667	0/1/1	1|0	3	2.38419e-07	0.000170706	LOC100288142, LOC653513, NBPF9, PDE4DIP
1	144865850	G	48	T	221	AF=0.667	0/1/1	1|0	3	1.05737e-27	1.92986e-08	LOC100288142, LOC653513, NBPF9, PDE4DIP
1	144866662	T	114	C	168	AF=0.667	0/1/1	1|0	3	0.00155313	0.0135772	LOC100288142, LOC653513, NBPF9, PDE4DIP
1	144868170	C	36	T	132	AF=0.667	0/1/1	1|0	3	4.43029e-14	0.000994559	LOC100288142, LOC653513, NBPF9, PDE4DIP
1	144868626	G	0	A	13	AF=0.667	0/1/1	1|0	3	0.000244141	0.00680515	LOC100288142, LOC653513, NBPF9, PDE4DIP
1	144868632	C	0	T	13	AF=0.667	0/1/1	1|0	3	0.000244141	0.00680515	LOC100288142, LOC653513, NBPF9, PDE4DIP
1	144872293	A	0	G	19	AF=0.667	0/1/1	1|0	3	3.8147e-06	0.000831737	LOC100288142, LOC653513, NBPF9, PDE4DIP
1	144873887	C	46	T	141	AF=0.667	0/1/1	1|0	3	2.05749e-12	0.0127921	LOC100288142, LOC653513, NBPF9, PDE4DIP
1	144892368	A	84	T	19	AF=0.667	0/1/1	1|0	3	6.20763e-11	9.65947e-24	LOC100288142, LOC653513, NBPF9, PDE4DIP
1	144908068	A	9	G	5	AF=0.667	0/1/1	1|0	3	0.42395	0.0207631	LOC100288142, LOC653513, NBPF9, PDE4DIP
1	144909956	G	247	A	552	AF=0.333	0/0/1	0/1	3	1.27792e-27	2.28181e-94	LOC100288142, LOC653513, NBPF9, PDE4DIP
1	144913568	T	0	C	25	AF=0.667	0/1/1	1|0	3	5.96046e-08	5.54938e-05	LOC100288142, LOC653513, NBPF9, PDE4DIP
1	144924792	C	0	T	11	AF=0.667	0/1/1	1|0	3	0.000976562	0.0203885	LOC100288142, LOC653513, NBPF9, PDE4DIP
1	144926443	T	0	C	11	AF=0.667	0/1/1	1|0	3	0.000976562	0.0203885	LOC100288142, LOC653513, NBPF9, PDE4DIP
1	144929250	G	0	A	10	AF=0.667	0/1/1	1|0	3	0.00195312	0.0369765	LOC100288142, LOC653513, NBPF9, PDE4DIP
1	144930441	G	0	T	11	AF=0.667	0/1/1	1|0	3	0.000976562	0.0203885	LOC100288142, LOC653513, NBPF9, PDE4DIP
1	144930571	C	0	A	11	AF=0.667	0/1/1	1|0	3	0.000976562	0.0203885	LOC100288142, LOC653513, NBPF9, PDE4DIP
1	144940226	A	5	G	32	AF=0.667	0/1/1	1|0	3	7.42753e-06	0.0086628	LOC100288142, LOC653513, NBPF9, PDE4DIP
1	144940368	C	0	T	13	AF=0.667	0/1/1	1|0	3	0.000244141	0.00680515	LOC100288142, LOC653513, NBPF9, PDE4DIP
1	144940378	G	0	A	13	AF=0.667	0/1/1	1|0	3	0.000244141	0.00680515	LOC100288142, LOC653513, NBPF9, PDE4DIP
1	144990684	G	11	A	15	AF=0.333	0/0/1	1|0	3	0.557197	0.0116391	LOC100288142, LOC653513, NBPF9, PDE4DIP
1	144992369	G	30	A	13	AF=0.667	0/1/1	0/1	3	0.0137182	1.73514e-06	LOC100288142, LOC653513, NBPF9, PDE4DIP
1	144994902	G	788	A	1199	AF=0.333	0/0/1	0/1	3	2.69186e-20	1.05384e-133	LOC100288142, LOC653513, NBPF9, PDE4DIP
1	145013451	C	0	A	16	AF=0.333	0/0/1	0/1	3	3.05176e-05	2.28617e-08	LOC100288142, LOC653513, NBPF9, PDE4DIP
1	145016747	C	0	G	16	AF=0.333	0/0/1	0/1	3	3.05176e-05	2.28617e-08	BX647792, LOC100288142, LOC653513, NBPF9, PDE4DIP
1	145097094	T	19	G	15	AF=0.667	0/1/1	0/1	3	0.607591	0.00954535	LOC100288142, NBPF9, SEC22B
1	145102345	A	0	T	10	AF=0.333	0/0/1	0|1	3	0.00195312	1.67665e-05	LOC100288142, NBPF9, SEC22B
1	145102348	C	0	T	10	AF=0.333	0/0/1	0|1	3	0.00195312	1.67665e-05	LOC100288142, NBPF9, SEC22B
1	145103366	G	0	C	13	AF=0.333	0/0/1	0|1	3	0.000244141	6.1912e-07	LOC100288142, NBPF9, SEC22B
1	145103928	G	256	A	233	AF=0.333	0/0/1	0/1	3	0.319798	6.65305e-11	LOC100288142, NBPF9, SEC22B
1	145105452	T	0	C	15	AF=0.333	0/0/1	0|1	3	6.10352e-05	6.86536e-08	LOC100288142, NBPF9, SEC22B
1	145105513	A	0	G	15	AF=0.333	0/0/1	0|1	3	6.10352e-05	6.86536e-08	LOC100288142, NBPF9, SEC22B
1	145109549	G	0	T	454	AF=0.333	0/0/1	0|1	3	4.29944e-137	1.54768e-217	LOC100288142, NBPF9, SEC22B
1	145109583	C	0	A	640	AF=0.667	0/1/1	0/1	3	4.38362e-193	4.14085e-113	LOC100288142, NBPF9, SEC22B
1	145110213	G	0	A	21	AF=0.667	0/1/1	0/1	3	9.53674e-07	0.000274119	LOC100288142, NBPF9, SEC22B
1	145111485	A	0	G	32	AF=0.667	0/1/1	0/1	3	4.65661e-10	4.04139e-06	LOC100288142, NBPF9, SEC22B
1	145111839	T	0	C	18	AF=0.333	0/0/1	0|1	3	7.62939e-06	2.53511e-09	LOC100288142, NBPF9, SEC22B
1	145112428	C	0	T	613	AF=0.333	0/0/1	0|1	3	5.88359e-185	1.81265e-293	LOC100288142, NBPF9, SEC22B
1	145116679	T	2	C	349	AF=0.333	0/0/1	0|1	3	2.69357e-101	5.90029e-163	LOC100288142, NBPF9, SEC22B
1	145116948	C	0	T	136	AF=0.667	0/1/1	0/1	3	2.29589e-41	2.01399e-24	LOC100288142, NBPF9, SEC22B
1	145118171	G	0	A	158	AF=0.667	0/1/1	0/1	3	5.47382e-48	2.62945e-28	LOC100288142, NBPF9
1	145588536	C	29	T	11	AF=0.667	0/1/1	0|1	3	0.00642658	5.55276e-07	LOC100288142, NBPF10, NUDT17
1	145592073	A	2	T	24	AF=0.667	0/1/1	0|1	3	1.04904e-05	0.00547295	LOC100288142, NBPF10
1	145602791	C	0	G	11	AF=0.667	0/1/1	0|1	3	0.000976562	0.0203885	LOC100288142, NBPF10, POLR3C
1	145647767	C	0	T	12	AF=0.333	0/0/1	1|0	3	0.000488281	1.85922e-06	LOC100288142, NBPF10, RNF115
1	145662853	T	0	A	10	AF=0.333	0/0/1	1|0	3	0.00195312	1.67665e-05	LOC100288142, NBPF10, RNF115
1	145689271	A	14	G	16	AF=0.333	0/0/1	1|0	3	0.855536	0.0309569	LOC100288142, NBPF10
1	146637603	A	0	T	12	AF=0.333	0/0/1	1|0	3	0.000488281	1.85922e-06	PRKAB2
1	146714392	G	158	C	143	AF=0.667	0/1/1	0|1	3	0.419743	9.03404e-12	CHD1L
1	146714427	G	161	C	164	AF=0.333	0/0/1	1|0	3	0.911686	1.96873e-10	CHD1L
1	146720160	A	0	G	10	AF=0.333	0/0/1	1|0	3	0.00195312	1.67665e-05	CHD1L
1	146731952	C	9	A	51	AF=0.667	0/1/1	0|1	3	3.08504e-08	0.00227337	CHD1L
1	146733714	G	4	A	55	AF=0.667	0/1/1	0|1	3	1.69797e-12	2.39301e-06	CHD1L
1	146735636	G	13	A	8	AF=0.667	0/1/1	0|1	3	0.38331	0.00906972	CHD1L
1	146740986	C	0	T	79	AF=0.667	0/1/1	0|1	3	3.30872e-24	2.33272e-14	CHD1L
1	146746030	A	18	G	21	AF=0.333	0/0/1	1|0	3	0.749259	0.009858	CHD1L
1	146753902	G	0	C	20	AF=0.333	0/0/1	1|0	3	1.90735e-06	2.81115e-10	CHD1L
1	146753907	C	0	A	20	AF=0.333	0/0/1	1|0	3	1.90735e-06	2.81115e-10	CHD1L
1	146765454	C	2	G	50	AF=0.333	0/0/1	1|0	3	6.12399e-13	7.9709e-22	CHD1L
1	146767908	A	0	G	10	AF=0.667	0/1/1	0|1	3	0.00195312	0.0369765	None
1	146855182	A	0	T	46	AF=0.667	0/1/1	0|1	3	2.84217e-14	1.16437e-08	LINC00624
1	146902161	G	0	A	13	AF=0.333	0/0/1	1|0	3	0.000244141	6.1912e-07	LINC00624
1	146964025	G	0	A	17	AF=0.667	0/1/1	0|1	3	1.52588e-05	0.00136129	LINC00624
1	147074068	G	0	A	11	AF=0.667	0/1/1	0|1	3	0.000976562	0.0203885	BCL9
1	150267798	T	14	C	19	AF=0.333	0/0/1	1|0	3	0.48685	0.00486711	MRPS21
1	150270209	A	3	G	7	AF=0.333	0/0/1	1|0	3	0.34375	0.0195481	MRPS21
1	150274305	G	9	C	13	AF=0.333	0/0/1	1|0	3	0.523467	0.0208981	MRPS21
1	150280801	G	255	C	54	AF=0.333	0/0/1	1|0	3	2.19208e-32	7.09202e-10	MRPS21
1	150281202	A	39	C	50	AF=0.333	0/0/1	1|0	3	0.289096	1.31063e-05	None
1	150299145	G	0	A	10	AF=0.333	0/0/1	0|1	3	0.00195312	1.67665e-05	PRPF3
1	150311042	G	1	T	24	AF=0.667	0/1/1	0|1	3	1.54972e-06	0.000950131	PRPF3
1	150319884	G	1	A	18	AF=0.667	0/1/1	0|1	3	7.62939e-05	0.00663068	PRPF3
1	150320570	G	1	C	21	AF=0.667	0/1/1	0|1	3	1.09673e-05	0.00248782	PRPF3
1	150320571	C	1	T	21	AF=0.667	0/1/1	0|1	3	1.09673e-05	0.00248782	PRPF3
1	150320717	G	0	A	10	AF=0.667	0/1/1	0|1	3	0.00195312	0.0369765	PRPF3
1	150321486	G	0	A	31	AF=0.667	0/1/1	0|1	3	9.31323e-10	7.35694e-06	PRPF3
1	150323522	T	2	C	27	AF=0.667	0/1/1	0|1	3	1.62423e-06	0.00131338	PRPF3
1	150415990	G	0	C	12	AF=0.667	0/1/1	0|1	3	0.000488281	0.0115796	RPRD2
1	150425644	T	0	G	12	AF=0.667	0/1/1	0|1	3	0.000488281	0.0115796	RPRD2
1	150446067	C	18	T	7	AF=0.667	0/1/1	0|1	3	0.0432853	0.000127067	RPRD2
1	150446673	A	32	G	45	AF=0.333	0/0/1	1|0	3	0.171061	8.30332e-06	RPRD2
1	150447269	G	38	A	13	AF=0.667	0/1/1	0|1	3	0.000621043	3.1704e-09	RPRD2
1	150447398	A	43	G	35	AF=0.667	0/1/1	0|1	3	0.428207	9.22975e-05	RPRD2
1	150479901	C	8	T	50	AF=0.667	0/1/1	0|1	3	1.57026e-08	0.00116116	TARS2
1	150483236	A	1	C	14	AF=0.667	0/1/1	0|1	3	0.000976562	0.0279688	ECM1
1	150483355	C	58	T	48	AF=0.667	0/1/1	0|1	3	0.382126	6.74714e-06	ECM1
1	150483840	C	0	T	23	AF=0.667	0/1/1	0|1	3	2.38419e-07	0.000170706	ECM1
1	150484987	G	3	A	113	AF=0.667	0/1/1	0|1	3	6.26522e-30	1.76515e-16	ECM1
1	150522242	T	16	C	84	AF=0.667	0/1/1	0|1	3	2.60594e-12	0.000169577	ADAMTSL4
1	150526044	G	173	C	269	AF=0.667	0/1/1	0|1	3	5.7463e-06	0.0100272	ADAMTSL4
1	150526406	C	218	T	366	AF=0.667	0/1/1	0|1	3	9.6623e-10	0.0433222	ADAMTSL4
1	150527292	G	1	A	24	AF=0.667	0/1/1	0|1	3	1.54972e-06	0.000950131	ADAMTSL4
1	150527294	C	1	T	25	AF=0.667	0/1/1	0|1	3	8.04663e-07	0.000568314	ADAMTSL4
1	150527354	G	9	A	5	AF=0.667	0/1/1	0|1	3	0.42395	0.0207631	ADAMTSL4
1	150542128	A	12	G	5	AF=0.667	0/1/1	0|1	3	0.143463	0.00288012	None
1	150547747	G	598	A	1346	AF=0.667	0/1/1	0|1	3	5.11482e-66	0.0172163	MCL1
1	150583670	G	0	C	22	AF=0.667	0/1/1	0|1	3	4.76837e-07	0.000165688	None
1	150587140	T	0	G	12	AF=0.667	0/1/1	0|1	3	0.000488281	0.0115796	None
1	150588692	C	17	T	14	AF=0.667	0/1/1	0|1	3	0.7201	0.0203061	None
1	150596365	A	99	G	150	AF=0.667	0/1/1	0|1	3	0.00148117	0.0368706	ENSA
1	150602413	G	0	A	11	AF=0.667	0/1/1	0|1	3	0.000976562	0.0203885	None
1	150604110	G	12	T	9	AF=0.667	0/1/1	0|1	3	0.663624	0.0339537	None
1	150635066	C	0	T	33	AF=0.333	0/0/1	1|0	3	2.32831e-10	1.74044e-16	GOLPH3L
1	150642583	T	0	C	18	AF=0.333	0/0/1	1|0	3	7.62939e-06	2.53511e-09	GOLPH3L
1	150662531	C	0	T	30	AF=0.333	0/0/1	1|0	3	1.86265e-09	4.71332e-15	GOLPH3L
1	150662574	C	0	T	30	AF=0.333	0/0/1	1|0	3	1.86265e-09	4.71332e-15	GOLPH3L
1	150738197	C	26	T	29	AF=0.667	0/1/1	0|1	3	0.787706	0.0318678	CTSS
1	150766170	A	0	G	13	AF=0.667	0/1/1	0|1	3	0.000244141	0.00680515	None
1	150779524	T	0	A	19	AF=0.667	0/1/1	0|1	3	3.8147e-06	0.000831737	CTSK
1	150783985	T	12	C	25	AF=0.333	0/0/1	1|0	3	0.047031	2.73355e-05	ARNT
1	150808889	C	75	G	58	AF=0.333	0/0/1	1|0	3	0.165083	0.0129796	ARNT
1	150923099	T	39	C	46	AF=0.333	0/0/1	1|0	3	0.515426	0.000114096	SETDB1
1	150938571	G	1068	A	312	AF=0.333	0/0/1	1|0	3	6.04485e-97	3.48893e-18	CERS2
1	150940625	T	361	G	387	AF=0.667	0/1/1	0|1	3	0.360678	2.97727e-17	CERS2
1	150950062	G	0	A	10	AF=0.333	0/0/1	1|0	3	0.00195312	1.67665e-05	None
1	151006539	C	268	A	94	AF=0.333	0/0/1	1|0	3	1.70105e-20	0.00306466	PRUNE
1	151006691	C	48	T	59	AF=0.667	0/1/1	0|1	3	0.333705	0.0135669	PRUNE
1	151007574	G	15	C	94	AF=0.667	0/1/1	0|1	3	3.70612e-15	5.46375e-06	PRUNE
1	151009208	A	0	G	14	AF=0.333	0/0/1	1|0	3	0.00012207	2.06167e-07	BNIPL
1	151025777	A	236	G	609	AF=0.667	0/1/1	0|1	3	9.60067e-39	0.000884974	CDC42SE1
1	151028929	C	2	T	9	AF=0.333	0/0/1	1|0	3	0.0654297	0.0013606	CDC42SE1
1	151037732	T	0	A	15	AF=0.667	0/1/1	0|1	3	6.10352e-05	0.00409135	MLLT11
1	151089885	G	37	C	44	AF=0.667	0/1/1	0|1	3	0.505236	0.0243894	GABPB2
1	151089888	A	39	C	44	AF=0.667	0/1/1	0|1	3	0.660884	0.0101367	GABPB2
1	151091233	G	0	A	20	AF=0.667	0/1/1	0|1	3	1.90735e-06	0.000468994	None
1	151092086	C	16	T	36	AF=0.333	0/0/1	1|0	3	0.00778744	1.48841e-07	None
1	151097367	C	30	T	26	AF=0.333	0/0/1	1|0	3	0.68888	0.0462668	None
1	151104950	G	0	A	13	AF=0.333	0/0/1	1|0	3	0.000244141	6.1912e-07	SEMA6C
1	151341417	G	0	A	21	AF=0.667	0/1/1	0|1	3	9.53674e-07	0.000274119	SELENBP1
1	151341703	G	65	A	19	AF=0.333	0/0/1	1|0	3	4.74849e-07	0.0374476	SELENBP1
1	151344150	C	1	A	18	AF=0.667	0/1/1	0|1	3	7.62939e-05	0.00663068	SELENBP1
1	151344741	T	1	G	17	AF=0.667	0/1/1	0|1	3	0.000144958	0.010701	SELENBP1
1	151402045	A	0	G	18	AF=0.333	0/0/1	1|0	3	7.62939e-06	2.53511e-09	POGZ
1	151669555	C	29	A	29	AF=0.333	0/0/1	1|0	3	1	0.0113589	KIAA0488, SNX27
1	151669997	C	71	A	22	AF=0.333	0/0/1	1|0	3	3.48248e-07	0.0481737	KIAA0488, SNX27
1	151734690	G	0	C	10	AF=0.667	0/1/1	0|1	3	0.00195312	0.0369765	MRPL9
1	151735441	G	37	A	33	AF=0.667	0/1/1	0|1	3	0.720203	0.000849915	MRPL9
1	151845650	G	0	C	25	AF=0.667	0/1/1	0|1	3	5.96046e-08	5.54938e-05	THEM4
1	151846413	G	18	C	113	AF=0.667	0/1/1	0|1	3	5.1627e-18	5.76964e-07	THEM4
1	151846517	C	3	T	33	AF=0.667	0/1/1	0|1	3	2.27214e-07	0.00107215	THEM4
1	151847126	T	85	C	291	AF=0.667	0/1/1	0|1	3	1.70072e-27	6.62804e-06	THEM4
1	151859050	G	0	A	17	AF=0.667	0/1/1	0|1	3	1.52588e-05	0.00136129	THEM4
1	151862661	G	90	A	101	AF=0.667	0/1/1	0|1	3	0.469421	8.18062e-05	THEM4
1	151879676	G	2591	T	1006	AF=0.333	0/0/1	1|0	3	4.89953e-159	6.35927e-12	THEM4
1	151879761	G	2541	A	936	AF=0.333	0/0/1	1|0	3	3.4669e-169	5.05666e-16	THEM4
1	151879939	C	1413	T	627	AF=0.333	0/0/1	1|0	3	2.20576e-69	0.0145463	THEM4
1	153743623	C	0	T	13	AF=0.667	0/1/1	1|0	3	0.000244141	0.00680515	INTS3
1	153777848	C	0	T	65	AF=0.667	0/1/1	1|0	3	5.42101e-20	4.43903e-12	GATAD2B
1	153781888	G	23	A	93	AF=0.667	0/1/1	1|0	3	3.59715e-11	0.00156745	GATAD2B
1	153877724	G	0	A	18	AF=0.333	0/0/1	0|1	3	7.62939e-06	2.53511e-09	GATAD2B
1	153884084	C	0	T	22	AF=0.333	0/0/1	0|1	3	4.76837e-07	3.11726e-11	GATAD2B
1	153906397	A	32	G	31	AF=0.333	0/0/1	0|1	3	1	0.0104841	DENND4B
1	153913699	T	7	G	16	AF=0.333	0/0/1	0|1	3	0.0931396	0.000499885	DENND4B
1	153926078	T	55	C	67	AF=0.333	0/0/1	0|1	3	0.319308	1.05796e-06	CRTC2
1	153927270	T	0	C	10	AF=0.333	0/0/1	0|1	3	0.00195312	1.67665e-05	CRTC2
1	153931835	G	305	T	315	AF=0.667	0/1/1	1|0	3	0.717796	4.22323e-16	SLC39A1
1	153932212	G	231	C	163	AF=0.333	0/0/1	0|1	3	0.000717223	0.000895433	SLC39A1
1	153944594	C	0	T	17	AF=0.667	0/1/1	1|0	3	1.52588e-05	0.00136129	CREB3L4
1	154948327	G	30	T	26	AF=0.667	0/1/1	0|1	3	0.68888	0.00252132	CKS1B
1	154976137	G	2	T	20	AF=0.667	0/1/1	0|1	3	0.000121117	0.0128511	ZBTB7B
1	154977929	A	0	G	25	AF=0.667	0/1/1	0|1	3	5.96046e-08	5.54938e-05	ZBTB7B
1	154988957	A	124	G	100	AF=0.333	0/0/1	1|0	3	0.124163	0.000483624	ZBTB7B
1	155028774	T	15	G	8	AF=0.667	0/1/1	0|1	3	0.21004	0.00285358	ADAM15, LOC100505666
1	155109973	G	0	T	14	AF=0.667	0/1/1	0|1	3	0.00012207	0.00745572	SLC50A1
1	155174106	C	0	T	23	AF=0.667	0/1/1	0|1	3	2.38419e-07	0.000170706	THBS3
1	155230131	C	245	T	642	AF=0.667	0/1/1	0|1	3	9.91445e-42	0.000315272	SCAMP3
1	155232074	C	201	T	538	AF=0.667	0/1/1	0|1	3	2.42392e-36	0.000377668	SCAMP3
1	155241361	G	4	A	24	AF=0.667	0/1/1	0|1	3	0.000179991	0.0426479	CLK2
1	155248575	G	0	A	12	AF=0.667	0/1/1	0|1	3	0.000488281	0.0115796	HCN3
1	155255837	T	0	C	28	AF=0.667	0/1/1	0|1	3	7.45058e-09	1.95933e-05	HCN3
1	155255906	G	0	C	34	AF=0.667	0/1/1	0|1	3	1.16415e-10	1.36636e-06	HCN3
1	155256651	G	0	A	15	AF=0.667	0/1/1	0|1	3	6.10352e-05	0.00409135	HCN3
1	155258752	G	18	A	80	AF=0.667	0/1/1	0|1	3	1.66067e-10	0.00123595	HCN3
1	155258756	C	18	T	83	AF=0.667	0/1/1	0|1	3	3.7288e-11	0.000670631	HCN3
1	155259323	C	67	T	279	AF=0.667	0/1/1	0|1	3	7.02168e-32	1.23964e-08	HCN3, PKLR
1	155260096	G	53	A	284	AF=0.667	0/1/1	0|1	3	2.51335e-39	3.86529e-13	PKLR
1	155284261	C	23	T	98	AF=0.667	0/1/1	0|1	3	3.23986e-12	0.00067115	FDPS
1	155285854	T	55	C	23	AF=0.667	0/1/1	0|1	3	0.000377792	3.62291e-11	FDPS
1	155286258	C	76	T	81	AF=0.667	0/1/1	0|1	3	0.749665	9.00422e-05	FDPS
1	155289545	T	3	G	106	AF=0.667	0/1/1	0|1	3	6.65386e-28	3.75587e-15	FDPS, RUSC1-AS1
1	155321549	G	0	A	34	AF=0.667	0/1/1	0|1	3	1.16415e-10	1.36636e-06	ASH1L
1	155412930	A	20	G	4	AF=0.667	0/1/1	0|1	3	0.00154388	6.51453e-07	ASH1L
1	155424065	T	0	C	22	AF=0.667	0/1/1	0|1	3	4.76837e-07	0.000165688	ASH1L
1	155507543	T	0	A	13	AF=0.333	0/0/1	0|1	3	0.000244141	6.1912e-07	ASH1L
1	155629483	C	167	G	42	AF=0.333	0/0/1	1|0	3	7.7066e-19	3.48337e-05	YY1AP1
1	155639566	C	3	A	11	AF=0.333	0/0/1	0/1	3	0.057373	0.000684325	YY1AP1
1	155658085	T	23	C	5	AF=0.667	0/1/1	0|1	3	0.000912234	1.49877e-07	YY1AP1
1	155702111	T	73	C	34	AF=0.667	0/1/1	0|1	3	0.000206375	2.25843e-13	DAP3, YY1AP1
1	155706217	T	20	G	85	AF=0.667	0/1/1	0|1	3	1.0083e-10	0.00174778	DAP3, YY1AP1
1	155889327	C	20	T	7	AF=0.667	0/1/1	0|1	3	0.0191573	1.74735e-05	KIAA0907
1	155927752	G	0	A	21	AF=0.667	0/1/1	0|1	3	9.53674e-07	0.000274119	ARHGEF2
1	155929562	C	0	T	22	AF=0.667	0/1/1	0|1	3	4.76837e-07	0.000165688	ARHGEF2
1	155929673	C	0	A	18	AF=0.667	0/1/1	0|1	3	7.62939e-06	0.000825895	ARHGEF2
1	155929701	G	0	A	18	AF=0.667	0/1/1	0|1	3	7.62939e-06	0.000825895	ARHGEF2
1	155935244	C	0	A	32	AF=0.667	0/1/1	0|1	3	4.65661e-10	4.04139e-06	ARHGEF2
1	155940948	T	0	G	12	AF=0.333	0/0/1	1|0	3	0.000488281	1.85922e-06	ARHGEF2
1	155947930	C	1	T	19	AF=0.667	0/1/1	0|1	3	4.00543e-05	0.00702443	ARHGEF2
1	155951502	A	8	G	4	AF=0.667	0/1/1	0|1	3	0.387695	0.0263932	ARHGEF2
1	155952328	C	18	T	10	AF=0.667	0/1/1	0|1	3	0.184933	0.000952335	ARHGEF2
1	155983648	G	1	A	19	AF=0.333	0/0/1	1|0	3	4.00543e-05	1.15426e-08	SSR2
1	156027021	C	0	G	17	AF=0.667	0/1/1	0|1	3	1.52588e-05	0.00136129	LAMTOR2
1	156147326	T	0	C	13	AF=0.667	0/1/1	0|1	3	0.000244141	0.00680515	SEMA4A
1	156181530	A	39	G	33	AF=0.333	0/0/1	1|0	3	0.555998	0.0326474	SLC25A44
1	156198366	G	0	A	11	AF=0.667	0/1/1	0|1	3	0.000976562	0.0203885	PMF1, PMF1-BGLAP
1	156219450	A	88	G	259	AF=0.667	0/1/1	0|1	3	1.11774e-20	0.00168905	SMG5
1	156245245	T	0	C	20	AF=0.667	0/1/1	0|1	3	1.90735e-06	0.000468994	SMG5
1	156261491	G	7	C	33	AF=0.667	0/1/1	0|1	3	4.2277e-05	0.0425263	AF086351, TMEM79
1	156282224	A	1	G	38	AF=0.667	0/1/1	0|1	3	1.45519e-10	3.84705e-06	CCT3
1	156282649	A	2	G	20	AF=0.667	0/1/1	0|1	3	0.000121117	0.0128511	CCT3
1	156300110	T	0	C	14	AF=0.667	0/1/1	0|1	3	0.00012207	0.00745572	CCT3
1	156529779	C	0	T	15	AF=0.333	0/0/1	1|0	3	6.10352e-05	6.86536e-08	IQGAP3
1	156529896	C	0	T	15	AF=0.333	0/0/1	1|0	3	6.10352e-05	6.86536e-08	IQGAP3
1	156564922	C	322	T	63	AF=0.333	0/0/1	1|0	3	5.64963e-43	9.53675e-14	APOA1BP, GPATCH4
1	156566491	A	19	G	12	AF=0.667	0/1/1	0|1	3	0.281042	0.00176046	APOA1BP, GPATCH4
1	156612932	T	175	C	201	AF=0.667	0/1/1	0|1	3	0.197236	1.24053e-07	BC005081, BCAN
1	156615114	A	133	G	208	AF=0.667	0/1/1	0|1	3	5.76256e-05	0.0288624	BCAN
1	156623625	C	15	T	6	AF=0.667	0/1/1	0|1	3	0.0783539	0.000602161	BCAN
1	156626358	C	13	A	4	AF=0.667	0/1/1	0|1	3	0.0490417	0.000337667	BCAN
1	156693018	C	104	G	161	AF=0.667	0/1/1	0|1	3	0.000556521	0.0432554	ISG20L2
1	156698265	C	67	T	20	AF=0.333	0/0/1	1|0	3	4.30537e-07	0.040957	RRNAD1
1	156700845	C	0	A	18	AF=0.667	0/1/1	0|1	3	7.62939e-06	0.000825895	RRNAD1
1	156704613	G	0	A	13	AF=0.333	0/0/1	1|0	3	0.000244141	6.1912e-07	RRNAD1
1	156707697	G	0	A	19	AF=0.667	0/1/1	0|1	3	3.8147e-06	0.000831737	MRPL24
1	156708244	C	22	G	13	AF=0.667	0/1/1	0|1	3	0.175465	0.000443023	MRPL24
1	156711625	C	0	G	15	AF=0.667	0/1/1	0|1	3	6.10352e-05	0.00409135	None
1	156713558	G	1617	A	723	AF=0.333	0/0/1	1|0	3	5.28427e-78	0.0140151	HDGF
1	156720382	A	0	G	14	AF=0.667	0/1/1	0|1	3	0.00012207	0.00745572	HDGF
1	156752612	T	0	A	10	AF=0.667	0/1/1	0|1	3	0.00195312	0.0369765	PRCC
1	156760036	G	10	C	7	AF=0.667	0/1/1	0|1	3	0.629059	0.0368036	PRCC
1	156764038	T	0	C	21	AF=0.667	0/1/1	0|1	3	9.53674e-07	0.000274119	PRCC
1	156774029	C	0	T	12	AF=0.333	0/0/1	1|0	3	0.000488281	1.85922e-06	None
1	156774196	G	0	A	11	AF=0.333	0/0/1	1|0	3	0.000976562	5.58324e-06	None
1	156776717	T	7	C	14	AF=0.333	0/0/1	1|0	3	0.189247	0.00201017	SH2D2A
1	156783292	C	1	T	35	AF=0.667	0/1/1	0|1	3	1.07684e-09	1.89541e-05	SH2D2A
1	156786574	T	3	A	21	AF=0.667	0/1/1	0|1	3	0.000277162	0.0302999	NTRK1, SH2D2A
1	156786575	C	3	A	20	AF=0.667	0/1/1	0|1	3	0.000488281	0.0451487	NTRK1, SH2D2A
1	156838141	T	9	C	21	AF=0.333	0/0/1	1|0	3	0.0427739	4.88829e-05	NTRK1
1	156885767	A	64	G	92	AF=0.333	0/0/1	1|0	3	0.0303103	6.47473e-11	PEAR1
1	156909695	G	1	A	29	AF=0.333	0/0/1	1|0	3	5.7742e-08	2.87937e-13	ARHGEF11
1	156940325	A	0	G	15	AF=0.333	0/0/1	1|0	3	6.10352e-05	6.86536e-08	ARHGEF11
1	156945926	C	1	T	13	AF=0.333	0/0/1	1|0	3	0.00183105	5.98751e-06	ARHGEF11
1	156945989	T	1	G	12	AF=0.333	0/0/1	1|0	3	0.00341797	1.67404e-05	ARHGEF11
1	157101925	C	12	G	3	AF=0.667	0/1/1	0|1	3	0.0351562	0.000282079	ETV3
1	157102453	G	4	T	23	AF=0.667	0/1/1	0|1	3	0.000310749	0.0420033	ETV3
1	157246074	G	0	C	11	AF=0.667	0/1/1	0|1	3	0.000976562	0.0203885	None
1	158580887	T	111	C	89	AF=0.667	0/1/1	0|1	3	0.137367	1.38348e-10	SPTA1
1	158582838	G	3	C	7	AF=0.333	0/0/1	1|0	3	0.34375	0.0195481	SPTA1
1	158586277	G	9	A	19	AF=0.333	0/0/1	1|0	3	0.0871586	0.000206176	SPTA1
1	158587858	G	0	A	13	AF=0.667	0/1/1	0|1	3	0.000244141	0.00680515	SPTA1
1	158588916	C	0	G	42	AF=0.667	0/1/1	0|1	3	4.54747e-13	5.67804e-08	SPTA1
1	158591731	T	1	A	20	AF=0.667	0/1/1	0|1	3	2.09808e-05	0.0041343	SPTA1
1	158592192	A	0	T	18	AF=0.667	0/1/1	0|1	3	7.62939e-06	0.000825895	SPTA1
1	158592935	G	77	A	64	AF=0.667	0/1/1	0|1	3	0.312213	2.28451e-07	SPTA1
1	158606449	G	91	T	102	AF=0.667	0/1/1	0|1	3	0.471732	6.64222e-05	SPTA1
1	158607609	T	0	C	18	AF=0.667	0/1/1	0|1	3	7.62939e-06	0.000825895	SPTA1
1	158607935	T	79	G	100	AF=0.333	0/0/1	1|0	3	0.134724	7.95528e-10	SPTA1
1	158631171	A	68	C	56	AF=0.333	0/0/1	1|0	3	0.323248	0.00734207	SPTA1
1	159854251	T	0	C	10	AF=0.333	0/0/1	1|0	3	0.00195312	1.67665e-05	CCDC19
1	159889686	G	12	A	6	AF=0.667	0/1/1	0|1	3	0.237885	0.00456538	TAGLN2
1	159892088	G	14	A	4	AF=0.667	0/1/1	0|1	3	0.0308838	0.00014314	TAGLN2
1	159995288	C	28	A	27	AF=0.667	0/1/1	0|1	3	1	0.00925354	None
1	159995633	G	8	A	46	AF=0.667	0/1/1	0|1	3	1.38434e-07	0.00346748	None
1	159995809	G	28	A	33	AF=0.667	0/1/1	0|1	3	0.608921	0.0415471	None
1	160000435	A	57	T	76	AF=0.667	0/1/1	0|1	3	0.11824	0.0214124	PIGM
1	160185534	G	10	A	12	AF=0.333	0/0/1	1|0	3	0.831812	0.0418515	DCAF8
1	160215694	C	0	T	12	AF=0.667	0/1/1	0|1	3	0.000488281	0.0115796	DCAF8
1	160245041	G	0	C	10	AF=0.667	0/1/1	0|1	3	0.00195312	0.0369765	DCAF8
1	160246704	C	47	T	8	AF=0.333	0/0/1	1|0	3	8.06761e-08	0.00240465	DCAF8, PEX19
1	160252237	A	156	G	132	AF=0.333	0/0/1	1|0	3	0.175222	1.08834e-05	DCAF8, PEX19
1	160271554	T	0	C	12	AF=0.333	0/0/1	1|0	3	0.000488281	1.85922e-06	COPA
1	160276709	T	1	C	15	AF=0.667	0/1/1	0|1	3	0.000518799	0.0296204	COPA
1	160302983	G	0	A	41	AF=0.667	0/1/1	0|1	3	9.09495e-13	9.77283e-08	COPA
1	160303416	G	159	A	482	AF=0.667	0/1/1	0|1	3	1.04809e-38	3.14229e-06	COPA
1	160309450	G	17	C	16	AF=0.667	0/1/1	0|1	3	1	0.0401064	COPA
1	160327865	C	1	T	13	AF=0.333	0/0/1	1|0	3	0.00183105	5.98751e-06	NCSTN
1	160340860	G	2	T	12	AF=0.333	0/0/1	0/1	3	0.0129395	8.12578e-05	NHLH1
1	160341142	T	0	C	36	AF=0.667	0/1/1	0|1	3	2.91038e-11	8.38364e-07	NHLH1
1	160386349	A	3	T	25	AF=0.333	0/0/1	1|0	3	2.74405e-05	1.18588e-09	VANGL2
1	160386374	A	0	G	25	AF=0.333	0/0/1	1|0	3	5.96046e-08	1.15108e-12	VANGL2
1	160388141	C	6	T	38	AF=0.333	0/0/1	1|0	3	9.43038e-07	4.79233e-13	VANGL2
1	160388370	T	0	C	13	AF=0.333	0/0/1	1|0	3	0.000244141	6.1912e-07	VANGL2
1	160511648	C	11	T	8	AF=0.667	0/1/1	0|1	3	0.647606	0.0286644	CD84
1	160514859	G	0	A	10	AF=0.667	0/1/1	0|1	3	0.00195312	0.0369765	CD84
1	160514955	T	0	C	17	AF=0.667	0/1/1	0|1	3	1.52588e-05	0.00136129	CD84
1	160515634	A	1	C	13	AF=0.667	0/1/1	0|1	3	0.00183105	0.0448737	CD84
1	160515664	C	1	T	13	AF=0.667	0/1/1	0|1	3	0.00183105	0.0448737	CD84
1	160613181	T	0	C	15	AF=0.667	0/1/1	0|1	3	6.10352e-05	0.00409135	SLAMF1
1	161307319	A	10	G	4	AF=0.667	0/1/1	0|1	3	0.179565	0.00400617	SDHC
1	161310719	C	0	T	21	AF=0.667	0/1/1	0|1	3	9.53674e-07	0.000274119	SDHC
1	161394500	T	0	C	24	AF=0.667	0/1/1	0|1	3	1.19209e-07	9.55543e-05	None
1	161473873	A	0	C	10	AF=0.667	0/1/1	1|0	3	0.00195312	0.0369765	None
1	161476533	T	20	C	11	AF=0.667	0/1/1	1|0	3	0.149613	0.000427488	FCGR2A
1	161480649	A	239	G	581	AF=0.667	0/1/1	1|0	3	1.18886e-33	0.0117177	FCGR2A
1	161575538	C	43	T	25	AF=0.667	0/1/1	0|1	3	0.0384601	4.91547e-07	None
1	161695221	A	0	C	11	AF=0.333	0/0/1	1|0	3	0.000976562	5.58324e-06	FCRLB
1	161718740	C	13	G	6	AF=0.667	0/1/1	0|1	3	0.167068	0.00231089	None
1	161721707	C	207	T	252	AF=0.667	0/1/1	0|1	3	0.0398841	1.72924e-07	DUSP12
1	161724376	A	12	G	19	AF=0.333	0/0/1	1|0	3	0.281042	0.00176046	DUSP12
1	161748015	T	0	C	11	AF=0.667	0/1/1	0|1	3	0.000976562	0.0203885	ATF6
1	161751741	A	145	G	179	AF=0.667	0/1/1	0|1	3	0.0665873	2.01529e-05	ATF6
1	161762761	A	0	T	20	AF=0.667	0/1/1	0|1	3	1.90735e-06	0.000468994	ATF6
1	161854738	C	0	A	18	AF=0.667	0/1/1	0|1	3	7.62939e-06	0.000825895	ATF6
1	162369901	T	0	A	17	AF=0.75	0/1/1/1	0|1	4	1.52588e-05	0.0106177	SH2D1B
1	162563661	C	12	T	15	AF=0.75	0/1/1/1	0|1	4	0.701108	0.0258553	UAP1
1	163215128	C	13	T	7	AF=0.75	0/1/1/1	0|1	4	0.263176	0.000183704	RGS5
1	163269268	A	13	G	3	AF=0.75	0/1/1/1	0|1	4	0.0212708	3.78327e-06	RGS5
1	163279188	C	15	T	13	AF=0.75	0/1/1/1	0|1	4	0.850554	0.00143604	RGS5
1	163279431	C	0	T	14	AF=0.75	0/1/1/1	0|1	4	0.00012207	0.0281275	RGS5
1	163279745	C	0	G	27	AF=0.75	0/1/1/1	0|1	4	1.49012e-08	0.000585219	RGS5
1	163279979	C	0	T	15	AF=0.75	0/1/1/1	0|1	4	6.10352e-05	0.0306633	RGS5
1	163280158	C	14	T	14	AF=0.75	0/1/1/1	0|1	4	1	0.00409886	RGS5
1	163281542	C	0	T	16	AF=0.75	0/1/1/1	0|1	4	3.05176e-05	0.0174923	RGS5
1	163282358	G	5	A	13	AF=0.25	0/0/0/1	1|0	4	0.0962524	3.42457e-05	RGS5
1	163286765	A	3	G	44	AF=0.75	0/1/1/1	0|1	4	2.46473e-10	0.00196326	RGS5
1	163286833	A	0	G	55	AF=0.75	0/1/1/1	0|1	4	5.55112e-17	1.74281e-07	RGS5
1	163288666	G	0	A	14	AF=0.75	0/1/1/1	0|1	4	0.00012207	0.0281275	RGS5
1	163304817	T	0	C	12	AF=0.25	0/0/0/1	1|0	4	0.000488281	5.96046e-08	NUF2
1	163317182	C	9	G	7	AF=0.75	0/1/1/1	0|1	4	0.803619	0.00746972	NUF2
1	165600146	G	1	A	101	AF=0.75	0/1/1/1	0|1	4	4.06263e-29	1.41254e-11	MGST3
1	165600267	T	1	A	64	AF=0.75	0/1/1/1	0|1	4	3.57787e-18	3.41504e-07	MGST3
1	165601466	G	0	A	14	AF=0.75	0/1/1/1	0|1	4	0.00012207	0.0281275	MGST3
1	165624799	G	288	T	121	AF=0.25	0/0/0/1	1|0	4	8.33532e-17	0.034588	MGST3
1	165652273	A	83	G	112	AF=0.75	0/1/1/1	0|1	4	0.0446725	8.26196e-08	ALDH9A1
1	165667781	T	1	G	27	AF=0.75	0/1/1/1	0|1	4	2.16067e-07	0.007062	ALDH9A1
1	165673681	A	0	C	18	AF=0.75	0/1/1/1	0|1	4	7.62939e-06	0.0110595	LOC440700
1	165874028	G	5	A	13	AF=0.25	0/0/0/1	1|0	4	0.0962524	3.42457e-05	UCK2
1	165876705	A	8	G	7	AF=0.75	0/1/1/1	0|1	4	1	0.0172998	UCK2
1	165877575	A	41	C	57	AF=0.75	0/1/1/1	0|1	4	0.129293	0.00025769	UCK2
1	166826752	A	54	G	112	AF=0.75	0/1/1/1	0|1	4	7.92591e-06	0.0310176	TADA1
1	167242605	C	0	G	12	AF=0.25	0/0/0/1	1|0	4	0.000488281	5.96046e-08	POU2F1
1	167389821	A	1	G	25	AF=0.75	0/1/1/1	0|1	4	8.04663e-07	0.0106674	POU2F1
1	167391498	G	4	A	60	AF=0.75	0/1/1/1	0|1	4	7.36304e-14	0.000140807	POU2F1
1	167392702	A	9	G	125	AF=0.75	0/1/1/1	0|1	4	2.88306e-27	6.33247e-08	POU2F1
1	167393635	G	16	A	109	AF=0.75	0/1/1/1	0|1	4	3.42225e-18	0.00124036	POU2F1
1	167510996	G	447	A	1131	AF=0.75	0/1/1/1	0|1	4	1.99731e-68	0.00273726	CREG1
1	167511035	C	523	G	1072	AF=0.75	0/1/1/1	0|1	4	1.07966e-43	3.38265e-12	CREG1
1	167511595	A	28	T	11	AF=0.75	0/1/1/1	0|1	4	0.0094753	1.12185e-09	CREG1
1	167511844	G	4	A	44	AF=0.75	0/1/1/1	0|1	4	1.51383e-09	0.00673067	CREG1
1	167513648	G	10	C	10	AF=0.75	0/1/1/1	0|1	4	1	0.0170356	CREG1
1	167514533	C	0	T	35	AF=0.75	0/1/1/1	0|1	4	5.82077e-11	9.36952e-05	CREG1
1	167553590	T	0	C	16	AF=0.25	0/0/0/1	1|0	4	3.05176e-05	2.32831e-10	None
1	167553649	G	0	A	12	AF=0.25	0/0/0/1	1|0	4	0.000488281	5.96046e-08	None
1	167602304	A	10	C	32	AF=0.25	0/0/0/1	1|0	4	0.000940674	4.98899e-12	RCSD1
1	167608109	A	77	G	11	AF=0.25	0/0/0/1	1|0	4	2.40155e-13	0.00629901	RCSD1
1	167608402	A	0	G	12	AF=0.25	0/0/0/1	1|0	4	0.000488281	5.96046e-08	RCSD1
1	167611038	G	18	A	20	AF=0.25	0/0/0/1	1|0	4	0.871415	0.000255597	RCSD1
1	167611909	C	56	T	9	AF=0.25	0/0/0/1	1|0	4	2.04925e-09	0.0437064	RCSD1
1	167616838	C	0	A	12	AF=0.25	0/0/0/1	1|0	4	0.000488281	5.96046e-08	RCSD1
1	167632822	T	0	C	20	AF=0.75	0/1/1/1	0|1	4	1.90735e-06	0.00711335	RCSD1
1	167634067	A	7	G	49	AF=0.75	0/1/1/1	0|1	4	7.45521e-09	0.0302421	RCSD1
1	167641292	A	2	G	20	AF=0.25	0/0/0/1	1|0	4	0.000121117	1.21986e-10	RCSD1
1	167674653	C	456	G	108	AF=0.25	0/0/0/1	1|0	4	7.76997e-52	0.00110594	RCSD1
1	167675649	T	47	C	39	AF=0.25	0/0/0/1	1|0	4	0.450548	4.77132e-05	None
1	167676718	C	21	T	15	AF=0.25	0/0/0/1	1|0	4	0.405032	0.0319561	None
1	167705094	A	0	G	10	AF=0.25	0/0/0/1	1|0	4	0.00195312	9.53674e-07	MPZL1
1	167778843	G	0	A	16	AF=0.75	0/1/1/1	0|1	4	3.05176e-05	0.0174923	ADCY10
1	167851999	C	0	T	16	AF=0.25	0/0/0/1	1|0	4	3.05176e-05	2.32831e-10	ADCY10
1	167855935	A	0	C	36	AF=0.75	0/1/1/1	0|1	4	2.91038e-11	5.3494e-05	ADCY10
1	168013850	T	192	C	88	AF=0.25	0/0/0/1	1|0	4	4.76799e-10	0.0155487	DCAF6
1	168043738	G	0	T	21	AF=0.75	0/1/1/1	0|1	4	9.53674e-07	0.00406549	DCAF6
1	168185727	A	0	T	18	AF=0.75	0/1/1/1	0|1	4	7.62939e-06	0.0110595	None
1	168185939	T	0	G	58	AF=0.75	0/1/1/1	0|1	4	6.93889e-18	1.1293e-07	None
1	168186066	G	5	A	55	AF=0.75	0/1/1/1	0|1	4	1.03827e-11	0.00154865	None
1	168186914	A	0	G	27	AF=0.75	0/1/1/1	0|1	4	1.49012e-08	0.000585219	None
1	168187686	T	7	C	8	AF=0.25	0/0/0/1	1|0	4	1	0.0172998	None
1	168188485	G	0	C	57	AF=0.75	0/1/1/1	0|1	4	1.38778e-17	1.06255e-07	None
1	168214098	T	20	G	4	AF=0.5	0/0/1/1	1|0	4	0.00154388	0.00154388	TBX19
1	168218504	T	125	C	58	AF=0.25	0/0/0/1	1|0	4	8.13608e-07	0.0403601	DQ576756, TBX19
1	168256773	G	0	C	16	AF=0.75	0/1/1/1	0|1	4	3.05176e-05	0.0174923	TBX19
1	169293721	G	128	A	73	AF=0.25	0/0/0/1	1|0	4	0.000127742	0.000423176	NME7
1	169442698	C	10	T	16	AF=0.25	0/0/0/1	1|0	4	0.32694	8.59372e-05	SLC19A2
1	169765052	C	7	G	55	AF=0.75	0/1/1/1	0|1	4	2.43008e-10	0.0118769	C1orf112
1	169784563	C	0	G	14	AF=0.75	0/1/1/1	0|1	4	0.00012207	0.0281275	C1orf112
1	169790161	T	0	G	14	AF=0.75	0/1/1/1	0|1	4	0.00012207	0.0281275	C1orf112
1	169823660	C	59	T	37	AF=0.75	0/1/1/1	0|1	4	0.0315481	4.67809e-14	SCYL3
1	171498241	A	0	G	15	AF=0.75	0/1/1/1	1|0	4	6.10352e-05	0.0306633	PRRC2C
1	171549706	T	0	A	13	AF=0.75	0/1/1/1	1|0	4	0.000244141	0.0480474	PRRC2C
1	171553778	A	0	G	10	AF=0.25	0/0/0/1	0|1	4	0.00195312	9.53674e-07	PRRC2C
1	171670823	T	37	A	58	AF=0.75	0/1/1/1	1|0	4	0.0396082	0.00282086	VAMP4
1	171673054	T	1	C	31	AF=0.75	0/1/1/1	1|0	4	1.53668e-08	0.00177224	VAMP4
1	171673236	G	1	A	50	AF=0.75	0/1/1/1	1|0	4	4.61853e-14	1.25682e-05	VAMP4
1	171673272	C	3	A	63	AF=0.75	0/1/1/1	1|0	4	1.30028e-15	2.18698e-05	VAMP4
1	171711152	A	6	C	50	AF=0.75	0/1/1/1	1|0	4	1.01821e-09	0.0126719	VAMP4
1	171714111	T	10	C	5	AF=0.75	0/1/1/1	1|0	4	0.301758	0.000794949	None
1	171714200	G	8	A	5	AF=0.75	0/1/1/1	1|0	4	0.581055	0.00564933	None
1	171751051	A	90	G	184	AF=0.75	0/1/1/1	1|0	4	1.40421e-08	0.00335432	METTL13
1	171751236	T	108	C	243	AF=0.75	0/1/1/1	1|0	4	4.40806e-13	0.0160419	METTL13
1	171755170	G	64	A	367	AF=0.75	0/1/1/1	1|0	4	1.00835e-52	3.58034e-07	METTL13
1	171811469	A	0	T	14	AF=0.75	0/1/1/1	1|0	4	0.00012207	0.0281275	DNM3
1	172373918	T	0	C	13	AF=0.25	0/0/0/1	0|1	4	0.000244141	1.49012e-08	DNM3, PIGC
1	172513444	T	0	A	15	AF=0.75	0/1/1/1	1|0	4	6.10352e-05	0.0306633	SUCO
1	173451088	G	99	A	49	AF=0.25	0/0/0/1	0|1	4	4.82914e-05	0.0285322	PRDX6
1	173457017	C	1678	T	395	AF=0.25	0/0/0/1	0|1	4	1.52835e-187	1.51332e-10	PRDX6
1	173764414	A	17	G	31	AF=0.25	0/0/0/1	0|1	4	0.0594634	8.37495e-09	None
1	173767443	A	65	T	34	AF=0.25	0/0/0/1	0|1	4	0.00239463	0.0364851	None
1	173820593	G	29	A	18	AF=0.25	0/0/0/1	0|1	4	0.143865	0.0426465	DARS2
1	173829180	G	25	C	7	AF=0.75	0/1/1/1	1|0	4	0.0021024	4.37678e-10	None
1	173832101	G	0	A	43	AF=0.75	0/1/1/1	1|0	4	2.27374e-13	8.17319e-06	None
1	173834605	G	716	A	291	AF=0.25	0/0/0/1	0|1	4	5.91488e-42	0.00504752	GAS5
1	173834632	G	2677	A	608	AF=0.25	0/0/0/1	0|1	4	1.49017e-307	7.66378e-19	GAS5
1	173857037	C	21	T	23	AF=0.25	0/0/0/1	0|1	4	0.880396	0.000144653	None
1	173859100	A	18	G	29	AF=0.25	0/0/0/1	0|1	4	0.143865	1.11141e-07	None
1	173868955	C	0	T	12	AF=0.25	0/0/0/1	0|1	4	0.000488281	5.96046e-08	None
1	173871279	A	3	C	60	AF=0.75	0/1/1/1	1|0	4	9.04832e-15	3.25797e-05	None
1	173900918	T	15	C	87	AF=0.75	0/1/1/1	1|0	4	1.6534e-13	0.01589	RC3H1
1	174150850	T	10	C	10	AF=0.25	0/0/0/1	0|1	4	1	0.0170356	RABGAP1L
1	174210910	G	0	A	25	AF=0.75	0/1/1/1	1|0	4	5.96046e-08	0.00166837	RABGAP1L
1	174214856	C	21	T	19	AF=0.25	0/0/0/1	0|1	4	0.874629	0.00272408	RABGAP1L
1	174488594	A	0	G	10	AF=0.25	0/0/0/1	0|1	4	0.00195312	9.53674e-07	RABGAP1L
1	174587502	A	0	G	10	AF=0.25	0/0/0/1	0|1	4	0.00195312	9.53674e-07	RABGAP1L
1	174587505	C	0	A	10	AF=0.25	0/0/0/1	0|1	4	0.00195312	9.53674e-07	RABGAP1L
1	174587683	A	0	C	10	AF=0.25	0/0/0/1	0|1	4	0.00195312	9.53674e-07	RABGAP1L
1	174962082	C	23	T	17	AF=0.75	0/1/1/1	1|0	4	0.429591	1.23046e-05	RABGAP1L
1	174964850	C	0	T	30	AF=0.75	0/1/1/1	1|0	4	1.86265e-09	0.000394276	None
1	175938640	G	4	A	6	AF=0.25	0/0/0/1	0|1	4	0.753906	0.0197277	RFWD2
1	175954031	A	0	G	22	AF=0.75	0/1/1/1	1|0	4	4.76837e-07	0.0024843	RFWD2
1	176852547	G	26	T	21	AF=0.75	0/1/1/1	1|0	4	0.560065	1.021e-05	ASTN1
1	178698336	T	0	G	12	AF=0.25	0/0/0/1	0|1	4	0.000488281	5.96046e-08	RALGPS2
1	178989016	C	21	T	4	AF=0.75	0/1/1/1	1|0	4	0.000910521	9.67693e-10	None
1	179042227	T	244	C	143	AF=0.25	0/0/0/1	0|1	4	3.20197e-07	1.98647e-07	FAM20B
1	179042300	C	109	A	18	AF=0.25	0/0/0/1	0|1	4	4.56961e-17	0.00393209	FAM20B
1	179044723	A	141	G	169	AF=0.75	0/1/1/1	1|0	4	0.125016	7.8603e-15	FAM20B
1	179045500	C	118	A	67	AF=0.25	0/0/0/1	0|1	4	0.000217853	0.000656327	FAM20B
1	179046180	T	1	C	12	AF=0.25	0/0/0/1	0|1	4	0.00341797	5.96046e-07	None
1	179068851	A	21	G	106	AF=0.75	0/1/1/1	1|0	4	7.4992e-15	0.0307876	ABL2
1	179070334	C	33	G	24	AF=0.75	0/1/1/1	1|0	4	0.289244	2.08548e-07	ABL2
1	179071756	G	49	A	25	AF=0.5	0/0/1/1	1|0	4	0.00708425	0.00708425	ABL2
1	179071865	G	82	A	24	AF=0.75	0/1/1/1	1|0	4	1.33682e-08	1.84446e-29	ABL2
1	179071918	G	72	T	22	AF=0.75	0/1/1/1	1|0	4	2.2606e-07	1.40381e-25	ABL2
1	179072966	C	32	T	41	AF=0.75	0/1/1/1	1|0	4	0.349182	0.000582333	ABL2
1	179073039	C	40	G	14	AF=0.75	0/1/1/1	1|0	4	0.000535436	5.38955e-14	ABL2
1	179074869	T	17	G	13	AF=0.75	0/1/1/1	1|0	4	0.584665	0.000215694	ABL2
1	179133221	T	0	A	15	AF=0.25	0/0/0/1	0|1	4	6.10352e-05	9.31323e-10	ABL2
1	179136269	G	4	C	6	AF=0.25	0/0/0/1	0|1	4	0.753906	0.0197277	ABL2
1	179304892	T	0	C	11	AF=0.25	0/0/0/1	0|1	4	0.000976562	2.38419e-07	SOAT1
1	179319541	C	135	G	84	AF=0.25	0/0/0/1	0|1	4	0.000692998	1.48854e-05	SOAT1
1	179320578	A	136	G	80	AF=0.25	0/0/0/1	0|1	4	0.000168894	0.00010517	SOAT1
1	179324870	C	5	A	6	AF=0.25	0/0/0/1	0|1	4	1	0.0343275	SOAT1
1	179326323	A	9	G	8	AF=0.25	0/0/0/1	0|1	4	1	0.0477537	SOAT1
1	179811936	T	30	C	24	AF=0.25	0/0/0/1	0|1	4	0.496617	0.00234083	TOR1AIP2
1	179852074	T	40	C	70	AF=0.75	0/1/1/1	1|0	4	0.00544743	0.00797677	TOR1AIP1
1	179856874	T	0	C	17	AF=0.25	0/0/0/1	0|1	4	1.52588e-05	5.82077e-11	TOR1AIP1
1	179861042	C	0	T	13	AF=0.25	0/0/0/1	0|1	4	0.000244141	1.49012e-08	TOR1AIP1
1	179876988	C	27	G	209	AF=0.75	0/1/1/1	1|0	4	4.75795e-36	2.49525e-07	TOR1AIP1
1	179879039	C	0	T	13	AF=0.75	0/1/1/1	1|0	4	0.000244141	0.0480474	TOR1AIP1
1	179879185	C	0	T	23	AF=0.75	0/1/1/1	1|0	4	2.38419e-07	0.00258097	TOR1AIP1
1	179887681	G	43	C	69	AF=0.75	0/1/1/1	1|0	4	0.0177658	0.00204926	TOR1AIP1
1	179888228	G	69	C	66	AF=0.75	0/1/1/1	1|0	4	0.863415	9.00452e-11	TOR1AIP1
1	179890655	C	7	T	10	AF=0.25	0/0/0/1	0|1	4	0.629059	0.00310078	None
1	179893810	G	0	C	12	AF=0.75	0/1/1/1	1|0	4	0.000488281	0.0459291	None
1	179959297	C	9	T	12	AF=0.25	0/0/0/1	0|1	4	0.663624	0.00168708	CEP350
1	179964159	C	0	A	19	AF=0.75	0/1/1/1	1|0	4	3.8147e-06	0.00651671	CEP350
1	180124288	G	137	C	84	AF=0.25	0/0/0/1	0|1	4	0.000443043	2.33088e-05	QSOX1
1	180136504	C	9	G	4	AF=0.75	0/1/1/1	1|0	4	0.266846	0.000989124	QSOX1
1	180145968	A	0	G	24	AF=0.75	0/1/1/1	1|0	4	1.19209e-07	0.00152648	QSOX1
1	180239535	T	0	C	24	AF=0.75	0/1/1/1	1|0	4	1.19209e-07	0.00152648	LHX4, LOC100527964
1	180240106	T	2	C	36	AF=0.75	0/1/1/1	1|0	4	5.39876e-09	0.00242225	LHX4, LOC100527964
1	180240752	C	31	T	14	AF=0.75	0/1/1/1	1|0	4	0.0160944	7.52723e-10	LHX4, LOC100527964
1	180250160	T	5	C	49	AF=0.75	0/1/1/1	1|0	4	3.89139e-10	0.00673977	None
1	180260393	T	0	C	13	AF=0.75	0/1/1/1	1|0	4	0.000244141	0.0480474	ACBD6
1	180321718	C	0	T	13	AF=0.25	0/0/0/1	0|1	4	0.000244141	1.49012e-08	ACBD6
1	180354090	C	0	G	18	AF=0.75	0/1/1/1	1|0	4	7.62939e-06	0.0110595	ACBD6
1	180676263	A	0	G	16	AF=0.75	0/1/1/1	1|0	4	3.05176e-05	0.0174923	XPR1
1	180794761	C	0	A	14	AF=0.75	0/1/1/1	1|0	4	0.00012207	0.0281275	XPR1
1	180799656	C	3	G	30	AF=0.75	0/1/1/1	1|0	4	1.40117e-06	0.0418843	XPR1
1	180799786	A	0	G	23	AF=0.75	0/1/1/1	1|0	4	2.38419e-07	0.00258097	XPR1
1	180811478	A	0	T	14	AF=0.75	0/1/1/1	1|0	4	0.00012207	0.0281275	XPR1
1	180811482	C	0	T	14	AF=0.75	0/1/1/1	1|0	4	0.00012207	0.0281275	XPR1
1	180847645	G	1	A	9	AF=0.25	0/0/0/1	0|1	4	0.0214844	2.95639e-05	XPR1
1	180852364	G	0	A	20	AF=0.75	0/1/1/1	1|0	4	1.90735e-06	0.00711335	XPR1
1	180853719	C	0	T	49	AF=0.75	0/1/1/1	1|0	4	3.55271e-15	1.15266e-06	XPR1
1	180853815	T	33	C	23	AF=0.75	0/1/1/1	1|0	4	0.228806	7.3731e-08	XPR1
1	180855503	A	50	G	8	AF=0.25	0/0/0/1	0|1	4	1.57026e-08	0.048946	XPR1
1	180919255	C	0	T	21	AF=0.75	0/1/1/1	1|0	4	9.53674e-07	0.00406549	AK056657, KIAA1614
1	180921330	G	4	A	8	AF=0.25	0/0/0/1	0|1	4	0.387695	0.00278151	AK056657
1	180930024	C	0	G	19	AF=0.25	0/0/0/1	0|1	4	3.8147e-06	3.63798e-12	AK056657
1	180936817	G	16	A	17	AF=0.75	0/1/1/1	1|0	4	1	0.00389714	AK056657
1	180936823	A	13	G	17	AF=0.75	0/1/1/1	1|0	4	0.584665	0.0321895	AK056657
1	180953853	A	92	G	69	AF=0.25	0/0/0/1	0|1	4	0.0826258	9.51243e-07	STX6
1	181008007	C	0	T	10	AF=0.25	0/0/0/1	0|1	4	0.00195312	9.53674e-07	MR1
1	181026558	G	32	A	42	AF=0.25	0/0/0/1	0|1	4	0.295413	6.71415e-09	MR1
1	181027086	T	14	C	25	AF=0.25	0/0/0/1	0|1	4	0.108129	2.89566e-07	MR1
1	181068402	G	0	T	17	AF=0.25	0/0/0/1	0|1	4	1.52588e-05	5.82077e-11	None
1	182170065	T	0	C	19	AF=0.25	0/0/0/1	0|1	4	3.8147e-06	3.63798e-12	None
1	182294767	C	0	T	10	AF=0.25	0/0/0/1	0|1	4	0.00195312	9.53674e-07	None
1	182354850	A	61	G	323	AF=0.75	0/1/1/1	1|0	4	3.51971e-44	2.02436e-05	GLUL
1	182356399	A	1668	G	4689	AF=0.75	0/1/1/1	1|0	4	0	0.0229797	GLUL
1	182358196	C	19	G	29	AF=0.75	0/1/1/1	1|0	4	0.193413	0.0286554	GLUL
1	182358437	T	1	C	34	AF=0.75	0/1/1/1	1|0	4	2.09548e-09	0.000736143	GLUL
1	182360223	G	0	T	23	AF=0.75	0/1/1/1	1|0	4	2.38419e-07	0.00258097	GLUL
1	182360843	C	1232	G	5156	AF=0.75	0/1/1/1	1|0	4	0	2.20959e-27	GLUL
1	182549019	A	0	G	12	AF=0.75	0/1/1/1	1|0	4	0.000488281	0.0459291	RNASEL
1	182551337	A	2	C	48	AF=0.75	0/1/1/1	1|0	4	2.26663e-12	0.000125109	RNASEL
1	183521500	T	126	G	69	AF=0.25	0/0/0/1	0|1	4	5.41637e-05	0.00120834	SMG7
1	183604905	A	134	G	27	AF=0.25	0/0/0/1	0|1	4	2.9837e-18	0.0140107	ARPC5
1	183934680	T	17	C	13	AF=0.25	0/0/0/1	0|1	4	0.584665	0.0321895	COLGALT2
1	184760640	T	17	A	44	AF=0.5	0/0/1/1	1|0	4	0.000729905	0.000729905	FAM129A
1	184763999	A	66	G	70	AF=0.75	0/1/1/1	1|0	4	0.797102	3.62541e-09	FAM129A
1	184764067	C	39	G	38	AF=0.25	0/0/0/1	0|1	4	1	4.31531e-06	FAM129A
1	184764681	G	11	A	115	AF=0.75	0/1/1/1	1|0	4	5.27122e-23	4.47003e-06	FAM129A
1	184764824	C	35	T	113	AF=0.5	0/0/1/1	1|0	4	8.90689e-11	8.90689e-11	FAM129A
1	184765432	G	18	A	5	AF=0.75	0/1/1/1	1|0	4	0.010622	1.27104e-07	FAM129A
1	184772100	C	19	G	10	AF=0.75	0/1/1/1	1|0	4	0.136046	4.89827e-06	FAM129A
1	184777880	C	6	A	14	AF=0.25	0/0/0/1	0|1	4	0.115318	2.95117e-05	FAM129A
1	184801065	T	42	C	58	AF=0.75	0/1/1/1	1|0	4	0.133211	0.000190155	FAM129A
1	184821046	T	0	C	18	AF=0.75	0/1/1/1	1|0	4	7.62939e-06	0.0110595	FAM129A
1	184821240	C	0	T	18	AF=0.75	0/1/1/1	1|0	4	7.62939e-06	0.0110595	FAM129A
1	184849148	T	0	C	31	AF=0.75	0/1/1/1	1|0	4	9.31323e-10	0.000225423	FAM129A
1	184886854	G	0	T	19	AF=0.75	0/1/1/1	1|0	4	3.8147e-06	0.00651671	FAM129A
1	184926271	G	0	A	12	AF=0.75	0/1/1/1	1|0	4	0.000488281	0.0459291	FAM129A
1	185275103	T	13	C	127	AF=0.75	0/1/1/1	1|0	4	1.1449e-24	3.34647e-06	IVNS1ABP
1	186101539	A	0	G	12	AF=0.75	0/1/1/1	1|0	4	0.000488281	0.0459291	HMCN1, MIR548F1
1	186321242	C	168	T	708	AF=0.75	0/1/1/1	1|0	4	1.6153e-79	4.83032e-05	MIR548F1, TPR
1	186334579	C	0	T	12	AF=0.75	0/1/1/1	1|0	4	0.000488281	0.0459291	MIR548F1, TPR
1	186376799	A	0	G	27	AF=0.75	0/1/1/1	1|0	4	1.49012e-08	0.000585219	C1orf27, MIR548F1
1	186379733	G	0	A	18	AF=0.75	0/1/1/1	1|0	4	7.62939e-06	0.0110595	C1orf27, MIR548F1
1	186951551	G	0	C	10	AF=0.25	0/0/0/1	0/1	4	0.00195312	9.53674e-07	PLA2G4A
1	186954285	T	0	C	37	AF=0.75	0/1/1/1	1|0	4	1.45519e-11	3.28595e-05	PLA2G4A
1	187348185	C	0	T	13	AF=0.75	0/1/1/1	1|0	4	0.000244141	0.0480474	None
1	188314941	C	0	G	17	AF=0.25	0/0/0/1	0|1	4	1.52588e-05	5.82077e-11	None
1	189686751	A	0	G	10	AF=0.25	0/0/0/1	0|1	4	0.00195312	9.53674e-07	None
1	189686759	G	0	A	10	AF=0.25	0/0/0/1	0|1	4	0.00195312	9.53674e-07	None
1	192974570	A	0	G	32	AF=0.75	0/1/1/1	1|0	4	4.65661e-10	0.00013846	None
1	193015062	G	0	C	12	AF=0.75	0/1/1/1	1|0	4	0.000488281	0.0459291	UCHL5
1	193028121	A	0	T	21	AF=0.75	0/1/1/1	1|0	4	9.53674e-07	0.00406549	UCHL5
1	193033060	A	0	G	20	AF=0.75	0/1/1/1	1|0	4	1.90735e-06	0.00711335	TROVE2
1	193037742	T	0	C	16	AF=0.75	0/1/1/1	1|0	4	3.05176e-05	0.0174923	TROVE2
1	193054154	G	23	A	118	AF=0.75	0/1/1/1	1|0	4	1.38997e-16	0.0190965	TROVE2
1	193057971	T	2	A	26	AF=0.75	0/1/1/1	1|0	4	3.03239e-06	0.027852	AK022030, TROVE2
1	193072784	T	0	A	16	AF=0.75	0/1/1/1	1|0	4	3.05176e-05	0.0174923	GLRX2
1	193082883	A	0	C	18	AF=0.75	0/1/1/1	1|0	4	7.62939e-06	0.0110595	None
1	193083022	C	0	T	15	AF=0.75	0/1/1/1	1|0	4	6.10352e-05	0.0306633	None
1	193084045	T	11	C	8	AF=0.75	0/1/1/1	1|0	4	0.647606	0.00228843	None
1	193089481	T	0	C	28	AF=0.75	0/1/1/1	1|0	4	7.45058e-09	0.000607603	None
1	193089827	T	0	G	19	AF=0.75	0/1/1/1	1|0	4	3.8147e-06	0.00651671	None
1	193093298	G	0	A	22	AF=0.75	0/1/1/1	1|0	4	4.76837e-07	0.0024843	CDC73
1	193107687	G	0	A	12	AF=0.75	0/1/1/1	1|0	4	0.000488281	0.0459291	CDC73
1	193115698	G	0	A	25	AF=0.75	0/1/1/1	1|0	4	5.96046e-08	0.00166837	CDC73
1	193226928	A	0	G	14	AF=0.75	0/1/1/1	1|0	4	0.00012207	0.0281275	None
1	193246319	C	0	T	38	AF=0.75	0/1/1/1	1|0	4	7.27596e-12	3.42356e-05	None
1	194614499	A	0	C	16	AF=0.75	0/1/1/1	1|0	4	3.05176e-05	0.0174923	None
1	194614593	G	0	A	13	AF=0.75	0/1/1/1	1|0	4	0.000244141	0.0480474	None
1	194614995	T	4	C	35	AF=0.75	0/1/1/1	1|0	4	3.35316e-07	0.0398177	None
1	194616538	C	0	G	94	AF=0.75	0/1/1/1	1|0	4	1.00974e-28	3.09214e-12	None
1	194616903	G	0	A	88	AF=0.75	0/1/1/1	1|0	4	6.46235e-27	2.26007e-11	None
1	194679220	G	0	A	20	AF=0.75	0/1/1/1	1|0	4	1.90735e-06	0.00711335	None
1	194715139	T	0	C	13	AF=0.75	0/1/1/1	1|0	4	0.000244141	0.0480474	None
1	194749075	C	0	T	20	AF=0.75	0/1/1/1	1|0	4	1.90735e-06	0.00711335	None
1	194767924	A	0	G	33	AF=0.75	0/1/1/1	1|0	4	2.32831e-10	0.000143906	None
1	194787410	G	0	A	12	AF=0.75	0/1/1/1	1|0	4	0.000488281	0.0459291	None
1	194814390	C	0	A	16	AF=0.75	0/1/1/1	1|0	4	3.05176e-05	0.0174923	None
1	194824007	A	0	G	13	AF=0.75	0/1/1/1	1|0	4	0.000244141	0.0480474	None
1	194829410	C	17	A	107	AF=0.75	0/1/1/1	1|0	4	3.84438e-17	0.00256636	None
1	194829489	C	16	T	112	AF=0.75	0/1/1/1	1|0	4	6.37923e-19	0.000686144	None
1	196654324	A	97	C	90	AF=0.75	0/1/1/1	1|0	4	0.660948	3.62712e-15	CFH
1	196655713	T	31	C	7	AF=0.75	0/1/1/1	1|0	4	0.000116167	3.93622e-13	CFH
1	196655743	A	31	C	7	AF=0.75	0/1/1/1	1|0	4	0.000116167	3.93622e-13	CFH
1	196659237	C	86	T	336	AF=0.75	0/1/1/1	1|0	4	5.51179e-36	0.0282933	CFH, CFHR4
1	196660261	A	0	G	13	AF=0.75	0/1/1/1	1|0	4	0.000244141	0.0480474	CFH, CFHR4
1	196665651	C	1	A	19	AF=0.75	0/1/1/1	1|0	4	4.00543e-05	0.038177	CFH, CFHR4
1	196667944	C	1	G	30	AF=0.75	0/1/1/1	1|0	4	2.98023e-08	0.00281957	CFH, CFHR4
1	196672385	G	11	A	4	AF=0.75	0/1/1/1	1|0	4	0.118469	0.000115336	CFH, CFHR4
1	196673430	T	7	G	4	AF=0.75	0/1/1/1	1|0	4	0.548828	0.00756121	CFH, CFHR4
1	196674714	T	0	A	15	AF=0.75	0/1/1/1	1|0	4	6.10352e-05	0.0306633	CFH, CFHR4
1	196677163	C	9	A	6	AF=0.75	0/1/1/1	1|0	4	0.607239	0.00419301	CFH, CFHR4
1	196710916	T	0	C	29	AF=0.75	0/1/1/1	1|0	4	3.72529e-09	0.000359957	CFH, CFHR4
1	196870792	A	0	G	17	AF=0.25	0/0/0/1	0|1	4	1.52588e-05	5.82077e-11	CFHR4
1	196877689	C	58	G	38	AF=0.25	0/0/0/1	0|1	4	0.0519105	0.00195317	CFHR4
1	197070697	T	52	C	90	AF=0.75	0/1/1/1	1|0	4	0.00180171	0.00248853	ASPM
1	197070707	G	51	A	103	AF=0.75	0/1/1/1	1|0	4	3.37573e-05	0.0250927	ASPM
1	197070711	G	86	C	51	AF=0.25	0/0/0/1	0|1	4	0.00351999	0.00150234	ASPM
1	197070776	C	62	T	59	AF=0.25	0/0/0/1	0|1	4	0.855822	1.98801e-08	ASPM
1	197081396	C	0	T	20	AF=0.25	0/0/0/1	0|1	4	1.90735e-06	9.09495e-13	ASPM
1	197101303	C	0	A	12	AF=0.75	0/1/1/1	1|0	4	0.000488281	0.0459291	ASPM
1	197958337	T	0	C	23	AF=0.75	0/1/1/1	0|1	4	2.38419e-07	0.00258097	None
1	197959936	C	8	T	4	AF=0.75	0/1/1/1	0|1	4	0.387695	0.00278151	None
1	197960635	G	65	C	64	AF=0.75	0/1/1/1	0|1	4	1	6.1524e-10	None
1	197960889	C	36	A	64	AF=0.75	0/1/1/1	0|1	4	0.00663712	0.0148277	None
1	197964151	A	1	G	20	AF=0.75	0/1/1/1	0|1	4	2.09808e-05	0.0396569	None
1	197964342	A	21	G	17	AF=0.75	0/1/1/1	0|1	4	0.627103	8.34271e-05	None
1	198724214	C	1	T	15	AF=0.25	0/0/0/1	0|1	4	0.000518799	1.14087e-08	PTPRC
1	200375209	G	4	A	75	AF=0.75	0/1/1/1	1|0	4	5.24347e-18	5.59934e-06	None
1	200624807	T	0	G	14	AF=0.75	0/1/1/1	1|0	4	0.00012207	0.0281275	DDX59
1	200624821	C	0	A	23	AF=0.75	0/1/1/1	1|0	4	2.38419e-07	0.00258097	DDX59
1	200639028	A	32	G	37	AF=0.75	0/1/1/1	1|0	4	0.630456	0.000126694	DDX59
1	200639047	T	22	G	31	AF=0.75	0/1/1/1	1|0	4	0.271679	0.0100862	DDX59
1	200639050	A	23	C	31	AF=0.75	0/1/1/1	1|0	4	0.340891	0.00440774	DDX59
1	200712919	A	0	G	14	AF=0.25	0/0/0/1	0|1	4	0.00012207	3.72529e-09	CAMSAP2
1	200939642	C	1	T	35	AF=0.75	0/1/1/1	1|0	4	1.07684e-09	0.000736626	KIF21B
1	200941716	G	36	A	23	AF=0.25	0/0/0/1	0|1	4	0.117477	0.0161829	KIF21B
1	201453500	C	1	T	176	AF=0.75	0/1/1/1	1|0	4	1.85841e-51	6.43346e-21	CSRP1
1	201488875	C	0	A	16	AF=0.75	0/1/1/1	1|0	4	3.05176e-05	0.0174923	None
1	201640266	G	0	A	17	AF=0.75	0/1/1/1	1|0	4	1.52588e-05	0.0106177	NAV1
1	201643670	A	0	T	13	AF=0.75	0/1/1/1	1|0	4	0.000244141	0.0480474	NAV1
1	201643782	G	0	T	15	AF=0.75	0/1/1/1	1|0	4	6.10352e-05	0.0306633	NAV1
1	201645454	C	2	T	8	AF=0.25	0/0/0/1	0|1	4	0.109375	0.000415802	NAV1
1	201790826	T	22	C	10	AF=0.75	0/1/1/1	1|0	4	0.0501025	2.40614e-07	NAV1
1	201792306	T	8	C	34	AF=0.25	0/0/0/1	0|1	4	6.87711e-05	4.32945e-14	NAV1
1	201818629	T	0	C	17	AF=0.75	0/1/1/1	1|0	4	1.52588e-05	0.0106177	IPO9
1	201824390	G	0	A	16	AF=0.25	0/0/0/1	0|1	4	3.05176e-05	2.32831e-10	IPO9
1	201841476	A	37	G	11	AF=0.75	0/1/1/1	1|0	4	0.000222245	5.58457e-14	IPO9
1	201850057	T	2	C	54	AF=0.75	0/1/1/1	1|0	4	4.43257e-14	3.45489e-05	IPO9
1	201947787	G	0	A	20	AF=0.75	0/1/1/1	1|0	4	1.90735e-06	0.00711335	None
1	201954435	T	0	C	12	AF=0.75	0/1/1/1	1|0	4	0.000488281	0.0459291	RNPEP
1	201960269	G	4	A	61	AF=0.75	0/1/1/1	1|0	4	3.91866e-14	0.000140871	RNPEP
1	201973565	G	155	A	688	AF=0.75	0/1/1/1	1|0	4	8.00096e-81	5.51309e-06	RNPEP
1	202129826	T	20	C	20	AF=0.75	0/1/1/1	1|0	4	1	0.000716575	PTPN7
1	202130754	T	0	C	17	AF=0.75	0/1/1/1	1|0	4	1.52588e-05	0.0106177	None
1	202134974	G	22	A	34	AF=0.75	0/1/1/1	1|0	4	0.140895	0.0195536	None
1	202136137	G	22	T	29	AF=0.75	0/1/1/1	1|0	4	0.401062	0.00523491	None
1	202137090	T	17	C	87	AF=0.75	0/1/1/1	1|0	4	1.67259e-12	0.0415013	None
1	202137318	A	0	G	36	AF=0.75	0/1/1/1	1|0	4	2.91038e-11	5.3494e-05	PTPRVP
1	202139101	C	50	G	68	AF=0.75	0/1/1/1	1|0	4	0.117213	4.14488e-05	PTPRVP
1	202143512	A	13	G	9	AF=0.75	0/1/1/1	1|0	4	0.523467	0.000700489	PTPRVP
1	202144240	C	8	T	9	AF=0.75	0/1/1/1	1|0	4	1	0.0477537	PTPRVP
1	202147456	T	14	C	18	AF=0.75	0/1/1/1	1|0	4	0.596615	0.0225725	PTPRVP
1	202148042	T	8	C	8	AF=0.75	0/1/1/1	1|0	4	1	0.0371526	PTPRVP
1	202151566	A	27	G	6	AF=0.75	0/1/1/1	1|0	4	0.000324063	1.17711e-11	PTPRVP
1	202153583	C	7	T	4	AF=0.75	0/1/1/1	1|0	4	0.548828	0.00756121	PTPRVP
1	202154366	G	0	A	35	AF=0.75	0/1/1/1	1|0	4	5.82077e-11	9.36952e-05	PTPRVP
1	202457873	T	12	C	8	AF=0.75	0/1/1/1	1|0	4	0.503445	0.000935392	PPP1R12B
[truncated: 15,569 more rows]

## Sheet: Sheet2
hg19 reference; 1-based genomic coordinate counting
Table S11. Allele Specific Expression
Chr	Position	Ref allele	# RNA-seq reads of ref allele	Alt allele	# RNA-seq reads of alt allele	Frequency of alt allele in WGS	Genotype in WGS	Phased Genotype	CN	Binomial test p=0.5	Binomial test p=AF	Gene Overlap
1	840753	T	0	C	12	AF=0.5	0/0/1/1	1|0	4	0.000488281	0.000488281	None
1	846398	G	0	A	11	AF=0.5	0/0/1/1	1|0	4	0.000976562	0.000976562	None
1	851390	G	0	T	11	AF=0.5	0/0/1/1	0|1	4	0.000976562	0.000976562	None
1	882033	G	26	A	9	AF=0.5	0/0/1/1	1|0	4	0.00598812	0.00598812	NOC2L
1	891059	C	4	T	51	AF=0.5	0/0/1/1	0|1	4	2.04742e-11	2.04742e-11	NOC2L
1	900505	G	53	C	96	AF=0.5	0/0/1/1	1|0	4	0.000535676	0.000535676	KLHL17
1	935222	C	10	A	11	AF=0.25	0/0/0/1	1|0	4	1	0.00880112	HES4
1	949608	G	181	A	131	AF=0.5	0/0/1/1	0|1	4	0.00545126	0.00545126	ISG15
1	973377	G	3	A	16	AF=0.5	0/0/1/1	1|0	4	0.00442505	0.00442505	AGRN
1	974296	A	2	G	25	AF=0.5	0/0/1/1	1|0	4	5.64754e-06	5.64754e-06	AGRN
1	974894	C	21	T	4	AF=0.5	0/0/1/1	1|0	4	0.000910521	0.000910521	AGRN
1	975133	T	6	A	24	AF=0.5	0/0/1/1	1|0	4	0.00143091	0.00143091	AGRN
1	981087	A	24	G	8	AF=0.5	0/0/1/1	1|0	4	0.00700037	0.00700037	AGRN
1	982994	T	135	C	179	AF=0.5	0/0/1/1	1|0	4	0.0151072	0.0151072	AGRN
1	984302	T	24	C	52	AF=0.5	0/0/1/1	1|0	4	0.00176187	0.00176187	AGRN
1	988932	G	23	C	7	AF=0.5	0/0/1/1	1|0	4	0.00522288	0.00522288	AGRN
1	990517	C	244	T	158	AF=0.5	0/0/1/1	1|0	4	2.09445e-05	2.09445e-05	AGRN
1	990773	C	93	T	51	AF=0.5	0/0/1/1	1|0	4	0.00058514	0.00058514	AGRN
1	990984	G	182	A	260	AF=0.5	0/0/1/1	1|0	4	0.00024143	0.00024143	AGRN
1	1001177	G	8	C	21	AF=0.5	0/0/1/1	1|0	4	0.0241195	0.0241195	BC033949
1	1018144	T	109	C	201	AF=0.5	0/0/1/1	1|0	4	1.93641e-07	1.93641e-07	C1orf159
1	1018562	C	20	T	7	AF=0.5	0/0/1/1	1|0	4	0.0191573	0.0191573	C1orf159
1	1018704	A	12	G	26	AF=0.5	0/0/1/1	1|0	4	0.0335524	0.0335524	C1orf159
1	1019180	T	16	C	36	AF=0.5	0/0/1/1	1|0	4	0.00778744	0.00778744	C1orf159
1	1026801	T	4	A	18	AF=0.5	0/0/1/1	1|0	4	0.00434351	0.00434351	C1orf159
1	1036817	T	2	C	13	AF=0.5	0/0/1/1	0|1	4	0.00738525	0.00738525	C1orf159
1	1156131	T	39	C	62	AF=0.5	0/0/1/1	0|1	4	0.0280895	0.0280895	SDF4
1	1203938	T	2	C	14	AF=0.5	0/0/1/1	0|1	4	0.00418091	0.00418091	UBE2J2
1	1226292	G	0	A	10	AF=0.5	0/0/1/1	0|1	4	0.00195312	0.00195312	SCNN1D
1	1227244	G	0	A	13	AF=0.5	0/0/1/1	0|1	4	0.000244141	0.000244141	SCNN1D
1	1238492	G	0	A	16	AF=0.5	0/0/1/1	0|1	4	3.05176e-05	3.05176e-05	ACAP3
1	1245368	G	15	A	4	AF=0.5	0/0/1/1	1|0	4	0.0192108	0.0192108	PUSL1
1	1247494	T	258	C	519	AF=0.5	0/0/1/1	1|0	4	4.63455e-21	4.63455e-21	CPSF3L
1	1249187	G	267	A	318	AF=0.5	0/0/1/1	1|0	4	0.0386201	0.0386201	CPSF3L
1	1252851	T	59	C	95	AF=0.5	0/0/1/1	0|1	4	0.0046375	0.0046375	CPSF3L
1	1309885	A	48	G	29	AF=0.5	0/0/1/1	0|1	4	0.0395395	0.0395395	AURKAIP1
1	1325207	C	4	T	26	AF=0.5	0/0/1/1	1|0	4	5.94761e-05	5.94761e-05	CCNL2
1	1329803	A	53	G	16	AF=0.5	0/0/1/1	0|1	4	9.09506e-06	9.09506e-06	CCNL2
1	1334475	G	423	C	339	AF=0.5	0/0/1/1	1|0	4	0.0026174	0.0026174	CCNL2
1	1337334	G	233	T	138	AF=0.5	0/0/1/1	0|1	4	9.30245e-07	9.30245e-07	LOC148413, MRPL20
1	1337592	G	3181	C	975	AF=0.25	0/0/0/1	0/1	4	6.67705e-270	0.0218573	MRPL20
1	1337837	A	15	G	104	AF=0.5	0/0/1/1	0|1	4	1.45025e-17	1.45025e-17	MRPL20
1	1342945	C	48	A	23	AF=0.5	0/0/1/1	0|1	4	0.00406512	0.00406512	None
1	1431521	C	145	T	47	AF=0.5	0/0/1/1	1|0	4	7.96617e-13	7.96617e-13	ATAD3B
1	1550702	A	2	G	16	AF=0.5	0/0/1/1	1|0	4	0.00131226	0.00131226	None
1	1551428	C	49	T	18	AF=0.5	0/0/1/1	1|0	4	0.000194298	0.000194298	MIB2
1	1551927	T	32	C	67	AF=0.5	0/0/1/1	1|0	4	0.000562208	0.000562208	MIB2
1	1558792	T	1	C	26	AF=0.5	0/0/1/1	1|0	4	4.17233e-07	4.17233e-07	MIB2
1	1590526	G	0	C	20	AF=0.5	0/0/1/1	1|0	4	1.90735e-06	1.90735e-06	CDK11B
1	1590575	G	0	A	14	AF=0.5	0/0/1/1	1|0	4	0.00012207	0.00012207	CDK11B
1	1596974	C	19	T	87	AF=0.5	0/0/1/1	1|0	4	1.39919e-11	1.39919e-11	CDK11B, SLC35E2B
1	1602787	G	1	T	14	AF=0.5	0/0/1/1	1|0	4	0.000976562	0.000976562	CDK11B, SLC35E2B
1	1603434	G	15	T	4	AF=0.5	0/0/1/1	1|0	4	0.0192108	0.0192108	CDK11B, SLC35E2B
1	1609159	T	6	G	12	AF=0.25	0/0/0/1	1|0	4	0.237885	0.000231179	CDK11B, SLC35E2B
1	1609165	A	5	T	12	AF=0.25	0/0/0/1	1|0	4	0.143463	9.98902e-05	CDK11B, SLC35E2B
1	1615348	A	0	C	24	AF=0.5	0/0/1/1	1|0	4	1.19209e-07	1.19209e-07	CDK11B, SLC35E2B
1	1615705	T	0	C	19	AF=0.5	0/0/1/1	1|0	4	3.8147e-06	3.8147e-06	CDK11B, SLC35E2B
1	1618675	T	0	G	10	AF=0.5	0/0/1/1	1|0	4	0.00195312	0.00195312	CDK11B, SLC35E2B
1	1625606	G	0	A	18	AF=0.5	0/0/1/1	0/1	4	7.62939e-06	7.62939e-06	CDK11B, SLC35E2B
1	1647814	T	469	C	292	AF=0.5	0/0/1/1	1|0	4	1.47166e-10	1.47166e-10	CDK11A, CDK11B, SLC35E2B
1	1650787	T	125	C	73	AF=0.5	0/0/1/1	1|0	4	0.000269079	0.000269079	CDK11A, CDK11B, SLC35E2B
1	1650801	T	448	C	95	AF=0.5	0/0/1/1	1|0	4	8.67002e-56	8.67002e-56	CDK11A, CDK11B, SLC35E2B
1	1650807	T	102	C	421	AF=0.5	0/0/1/1	0|1	4	5.03184e-47	5.03184e-47	CDK11A, CDK11B, SLC35E2B
1	1650832	A	357	G	117	AF=0.5	0/0/1/1	1|0	4	2.81979e-29	2.81979e-29	CDK11A, CDK11B, SLC35E2B
1	1650845	G	112	A	331	AF=0.5	0/0/1/1	0|1	4	3.4894e-26	3.4894e-26	CDK11A, CDK11B, SLC35E2B
1	2118339	A	2	G	15	AF=0.5	0/0/1/1	1|0	4	0.00234985	0.00234985	C1orf86
1	2138679	A	0	G	17	AF=0.5	0/0/1/1	1|0	4	1.52588e-05	1.52588e-05	C1orf86
1	2162944	C	0	T	18	AF=0.5	0/0/1/1	1|0	4	7.62939e-06	7.62939e-06	SKI
1	2164116	T	0	C	20	AF=0.5	0/0/1/1	1|0	4	1.90735e-06	1.90735e-06	SKI
1	2202967	T	0	C	18	AF=0.5	0/0/1/1	1|0	4	7.62939e-06	7.62939e-06	SKI
1	2238237	A	66	T	38	AF=0.5	0/0/1/1	1|0	4	0.00779962	0.00779962	SKI
1	2239109	A	24	G	48	AF=0.5	0/0/1/1	1|0	4	0.00630983	0.00630983	SKI
1	2240383	C	6	T	66	AF=0.5	0/0/1/1	0|1	4	7.25575e-14	7.25575e-14	SKI
1	2301691	G	6	A	19	AF=0.5	0/0/1/1	0|1	4	0.0146333	0.0146333	MORN1
1	2324336	T	169	C	90	AF=0.5	0/0/1/1	1|0	4	1.04504e-06	1.04504e-06	RER1
1	2327075	C	26	T	53	AF=0.5	0/0/1/1	1|0	4	0.00318301	0.00318301	RER1
1	2335969	C	63	G	90	AF=0.5	0/0/1/1	1|0	4	0.035211	0.035211	RER1
1	2338879	G	18	A	33	AF=0.5	0/0/1/1	1|0	4	0.0488739	0.0488739	PEX10
1	2340200	T	37	C	7	AF=0.5	0/0/1/1	1|0	4	5.29958e-06	5.29958e-06	PEX10
1	2450310	G	4	C	34	AF=0.5	0/0/1/1	0|1	4	6.03854e-07	6.03854e-07	PANK4
1	3693112	C	25	T	7	AF=0.5	0/0/1/1	1|0	4	0.0021024	0.0021024	None
1	3693755	G	32	T	13	AF=0.5	0/0/1/1	1|0	4	0.00660882	0.00660882	None
1	3694796	G	0	A	24	AF=0.5	0/0/1/1	1|0	4	1.19209e-07	1.19209e-07	None
1	3696000	T	41	C	20	AF=0.5	0/0/1/1	1|0	4	0.00985345	0.00985345	None
1	3696890	A	378	C	242	AF=0.5	0/0/1/1	1|0	4	5.24537e-08	5.24537e-08	LRRC47
1	3697137	G	367	T	269	AF=0.5	0/0/1/1	0|1	4	0.000116531	0.000116531	LRRC47
1	3697291	C	273	T	209	AF=0.5	0/0/1/1	1|0	4	0.0040636	0.0040636	LRRC47
1	3701491	A	12	G	30	AF=0.5	0/0/1/1	1|0	4	0.0079159	0.0079159	LRRC47
1	3732782	T	0	C	18	AF=0.5	0/0/1/1	1|0	4	7.62939e-06	7.62939e-06	CEP104
1	3739290	G	6	A	17	AF=0.5	0/0/1/1	1|0	4	0.0346897	0.0346897	CEP104
1	3743109	A	1	G	11	AF=0.5	0/0/1/1	1|0	4	0.00634766	0.00634766	CEP104
1	3743132	T	1	C	11	AF=0.5	0/0/1/1	1|0	4	0.00634766	0.00634766	CEP104
1	3743391	C	20	T	8	AF=0.5	0/0/1/1	1|0	4	0.0356981	0.0356981	CEP104
1	3744548	A	0	G	12	AF=0.5	0/0/1/1	1|0	4	0.000488281	0.000488281	CEP104
1	3744641	G	0	A	10	AF=0.5	0/0/1/1	1|0	4	0.00195312	0.00195312	CEP104
1	3763864	G	0	A	18	AF=0.5	0/0/1/1	0|1	4	7.62939e-06	7.62939e-06	CEP104
1	3764216	C	4	T	31	AF=0.5	0/0/1/1	1|0	4	3.46545e-06	3.46545e-06	CEP104
1	3764461	C	9	T	33	AF=0.5	0/0/1/1	0|1	4	0.000271539	0.000271539	CEP104
1	3764611	T	9	C	33	AF=0.5	0/0/1/1	0|1	4	0.000271539	0.000271539	CEP104
1	3773511	G	55	A	57	AF=0.25	0/0/0/1	1|0	4	0.924775	4.47749e-09	CEP104
1	3773588	C	41	G	36	AF=0.75	0/1/1/1	0|1	4	0.648791	1.12945e-07	CEP104
1	3787196	A	0	T	11	AF=0.5	0/0/1/1	1|0	4	0.000976562	0.000976562	DFFB
1	3800480	G	87	T	151	AF=0.5	0/0/1/1	1|0	4	4.01375e-05	4.01375e-05	DFFB
1	3805963	A	161	G	106	AF=0.5	0/0/1/1	0|1	4	0.000915997	0.000915997	C1orf174
1	3806643	T	6	A	21	AF=0.5	0/0/1/1	0|1	4	0.00592461	0.00592461	C1orf174
1	3807388	G	219	A	164	AF=0.5	0/0/1/1	0|1	4	0.00572255	0.00572255	C1orf174
1	3809347	T	94	C	45	AF=0.5	0/0/1/1	1|0	4	3.93835e-05	3.93835e-05	C1orf174
1	4055230	T	0	C	11	AF=0.5	0/0/1/1	1|0	4	0.000976562	0.000976562	None
1	4069871	C	34	A	10	AF=0.5	0/0/1/1	0|1	4	0.000388131	0.000388131	None
1	4069878	G	34	T	10	AF=0.5	0/0/1/1	0|1	4	0.000388131	0.000388131	None
1	4071052	C	60	T	28	AF=0.5	0/0/1/1	0|1	4	0.000846496	0.000846496	None
1	4072276	T	31	C	11	AF=0.5	0/0/1/1	0|1	4	0.00288725	0.00288725	None
1	4074516	C	1	T	14	AF=0.5	0/0/1/1	0|1	4	0.000976562	0.000976562	None
1	5933384	C	10	G	29	AF=0.5	0/0/1/1	0|1	4	0.00337785	0.00337785	NPHP4
1	5942690	C	0	G	13	AF=0.5	0/0/1/1	1|0	4	0.000244141	0.000244141	NPHP4
1	5945961	C	14	T	3	AF=0.5	0/0/1/1	1|0	4	0.0127258	0.0127258	NPHP4
1	5945990	G	6	A	18	AF=0.5	0/0/1/1	0|1	4	0.0226558	0.0226558	NPHP4
1	5956909	C	0	A	21	AF=0.5	0/0/1/1	0|1	4	9.53674e-07	9.53674e-07	NPHP4
1	5960318	C	0	T	13	AF=0.5	0/0/1/1	1|0	4	0.000244141	0.000244141	NPHP4
1	5961018	C	0	T	16	AF=0.5	0/0/1/1	0|1	4	3.05176e-05	3.05176e-05	NPHP4
1	5965381	C	47	T	19	AF=0.5	0/0/1/1	1|0	4	0.000756107	0.000756107	NPHP4
1	5982173	A	0	G	11	AF=0.5	0/0/1/1	1|0	4	0.000976562	0.000976562	NPHP4
1	6046432	C	17	G	4	AF=0.5	0/0/1/1	1|0	4	0.00719738	0.00719738	NPHP4
1	6056168	A	5	G	15	AF=0.5	0/0/1/1	1|0	4	0.0413895	0.0413895	KCNAB2
1	6067640	C	18	G	5	AF=0.5	0/0/1/1	1|0	4	0.010622	0.010622	KCNAB2
1	6082403	T	0	C	11	AF=0.5	0/0/1/1	1|0	4	0.000976562	0.000976562	KCNAB2
1	6082417	C	0	T	11	AF=0.5	0/0/1/1	1|0	4	0.000976562	0.000976562	KCNAB2
1	6157475	T	0	C	12	AF=0.5	0/0/1/1	0|1	4	0.000488281	0.000488281	KCNAB2
1	6160870	G	12	A	31	AF=0.5	0/0/1/1	0|1	4	0.00540157	0.00540157	KCNAB2
1	6257856	G	152	A	97	AF=0.5	0/0/1/1	1|0	4	0.000593451	0.000593451	RPL22
1	6259090	C	27	T	65	AF=0.5	0/0/1/1	1|0	4	9.26404e-05	9.26404e-05	RPL22
1	6259130	A	63	G	35	AF=0.5	0/0/1/1	1|0	4	0.00609263	0.00609263	RPL22
1	6260663	A	2	C	387	AF=0.5	0/0/1/1	1|0	4	1.20324e-112	1.20324e-112	None
1	6261871	G	0	A	15	AF=0.5	0/0/1/1	1|0	4	6.10352e-05	6.10352e-05	None
1	6262231	A	0	T	40	AF=0.5	0/0/1/1	1|0	4	1.81899e-12	1.81899e-12	None
1	6263354	C	0	T	10	AF=0.5	0/0/1/1	1|0	4	0.00195312	0.00195312	None
1	6265368	A	0	G	67	AF=0.5	0/0/1/1	1|0	4	1.35525e-20	1.35525e-20	None
1	6266096	A	9	G	49	AF=0.5	0/0/1/1	1|0	4	8.9594e-08	8.9594e-08	None
1	6272137	A	20	G	6	AF=0.5	0/0/1/1	1|0	4	0.00935531	0.00935531	RNF207
1	6294072	T	0	C	12	AF=0.5	0/0/1/1	1|0	4	0.000488281	0.000488281	ICMT
1	6612894	C	0	T	27	AF=0.5	0/0/1/1	0|1	4	1.49012e-08	1.49012e-08	NOL9
1	6614230	G	203	A	89	AF=0.25	0/0/0/1	1|0	4	2.1102e-11	0.0359086	NOL9
1	6614535	G	84	A	148	AF=0.5	0/0/1/1	0|1	4	3.1721e-05	3.1721e-05	NOL9
1	6614653	C	0	G	21	AF=0.5	0/0/1/1	0|1	4	9.53674e-07	9.53674e-07	NOL9
1	6615695	C	1	T	50	AF=0.5	0/0/1/1	0|1	4	4.61853e-14	4.61853e-14	TAS1R1
1	6644723	G	33	A	54	AF=0.5	0/0/1/1	0|1	4	0.0314181	0.0314181	ZBTB48
1	6645867	G	16	A	5	AF=0.5	0/0/1/1	0|1	4	0.0266037	0.0266037	ZBTB48
1	6659505	G	119	A	70	AF=0.5	0/0/1/1	0|1	4	0.000449582	0.000449582	KLHL21
1	6683240	G	103	A	73	AF=0.5	0/0/1/1	0|1	4	0.0285314	0.0285314	PHF13
1	6689177	T	0	G	14	AF=0.5	0/0/1/1	0|1	4	0.00012207	0.00012207	THAP3
1	6690666	G	2	A	20	AF=0.5	0/0/1/1	1|0	4	0.000121117	0.000121117	THAP3
1	6694207	A	3	G	26	AF=0.5	0/0/1/1	0|1	4	1.52364e-05	1.52364e-05	THAP3
1	6695331	G	171	T	212	AF=0.5	0/0/1/1	0|1	4	0.0408231	0.0408231	DNAJC11, THAP3
1	6695802	A	4	G	18	AF=0.5	0/0/1/1	0|1	4	0.00434351	0.00434351	DNAJC11
1	6696845	G	0	A	24	AF=0.5	0/0/1/1	0|1	4	1.19209e-07	1.19209e-07	DNAJC11
1	6705528	G	4	A	18	AF=0.5	0/0/1/1	1|0	4	0.00434351	0.00434351	DNAJC11
1	6708758	C	36	T	7	AF=0.5	0/0/1/1	1|0	4	8.96304e-06	8.96304e-06	DNAJC11
1	6749824	G	0	A	11	AF=0.5	0/0/1/1	0|1	4	0.000976562	0.000976562	DNAJC11
1	6758140	C	0	T	11	AF=0.5	0/0/1/1	0|1	4	0.000976562	0.000976562	DNAJC11
1	6934460	A	0	G	10	AF=0.5	0/0/1/1	1|0	4	0.00195312	0.00195312	CAMTA1
1	7847446	T	5	A	6	AF=0.25	0/0/0/1	0/1	4	1	0.0343275	PER3
1	8015560	A	0	G	13	AF=0.5	0/0/1/1	0|1	4	0.000244141	0.000244141	None
1	8024690	T	3	C	16	AF=0.5	0/0/1/1	0|1	4	0.00442505	0.00442505	PARK7
1	8035271	T	5	G	19	AF=0.5	0/0/1/1	0|1	4	0.00661075	0.00661075	PARK7
1	8036075	G	1	C	18	AF=0.5	0/0/1/1	0|1	4	7.62939e-05	7.62939e-05	PARK7
1	8043124	G	0	T	24	AF=0.5	0/0/1/1	1|0	4	1.19209e-07	1.19209e-07	AX747125, PARK7
1	8183560	G	0	A	10	AF=0.5	0/0/1/1	1|0	4	0.00195312	0.00195312	None
1	8183615	A	0	G	10	AF=0.5	0/0/1/1	1|0	4	0.00195312	0.00195312	None
1	8413839	A	77	G	19	AF=0.5	0/0/1/1	1|0	4	1.86215e-09	1.86215e-09	RERE
1	8416957	G	0	C	13	AF=0.5	0/0/1/1	1|0	4	0.000244141	0.000244141	RERE
1	8425798	C	1	T	9	AF=0.5	0/0/1/1	1|0	4	0.0214844	0.0214844	RERE
1	8425900	T	56	C	32	AF=0.5	0/0/1/1	1|0	4	0.0137504	0.0137504	RERE
1	8462000	A	0	G	14	AF=0.5	0/0/1/1	1|0	4	0.00012207	0.00012207	RERE
1	8514897	C	0	A	17	AF=0.5	0/0/1/1	0|1	4	1.52588e-05	1.52588e-05	RERE
1	8515050	C	0	T	18	AF=0.5	0/0/1/1	0|1	4	7.62939e-06	7.62939e-06	RERE
1	8724522	C	0	T	20	AF=0.5	0/0/1/1	0|1	4	1.90735e-06	1.90735e-06	RERE
1	8735664	C	0	T	19	AF=0.5	0/0/1/1	0|1	4	3.8147e-06	3.8147e-06	RERE
1	8758794	C	0	A	26	AF=0.5	0/0/1/1	0|1	4	2.98023e-08	2.98023e-08	RERE
1	8930385	G	43	A	22	AF=0.5	0/0/1/1	0|1	4	0.0125025	0.0125025	ENO1
1	8931149	C	42	T	25	AF=0.75	0/1/1/1	0|1	4	0.0498001	8.04844e-11	ENO1
1	8931463	T	65	C	105	AF=0.5	0/0/1/1	0|1	4	0.00267298	0.00267298	ENO1
1	9297871	A	14	G	3	AF=0.5	0/0/1/1	1|0	4	0.0127258	0.0127258	H6PD
1	9330740	G	0	C	17	AF=0.5	0/0/1/1	1|0	4	1.52588e-05	1.52588e-05	H6PD
1	9655630	C	0	T	13	AF=0.5	0/0/1/1	0|1	4	0.000244141	0.000244141	TMEM201
1	9741193	A	190	G	129	AF=0.5	0/0/1/1	1|0	4	0.000755791	0.000755791	BC038541, PIK3CD
1	9781412	C	0	G	16	AF=0.5	0/0/1/1	0|1	4	3.05176e-05	3.05176e-05	PIK3CD
1	9787840	G	6	T	32	AF=0.5	0/0/1/1	0|1	4	2.43426e-05	2.43426e-05	PIK3CD
1	10002921	T	0	G	38	AF=0.5	0/0/1/1	0/1	4	7.27596e-12	7.27596e-12	LZIC
1	10462088	T	3	A	13	AF=0.5	0/0/1/1	1|0	4	0.0212708	0.0212708	PGD
1	10462092	T	0	A	13	AF=0.5	0/0/1/1	1|0	4	0.000244141	0.000244141	PGD
1	10522190	C	43	T	10	AF=0.5	0/0/1/1	1|0	4	5.55052e-06	5.55052e-06	DFFA
1	10565343	C	1	T	18	AF=0.5	0/0/1/1	1|0	4	7.62939e-05	7.62939e-05	PEX14
1	10582047	T	3	C	15	AF=0.5	0/0/1/1	0|1	4	0.00753784	0.00753784	PEX14
1	10603892	A	2	G	28	AF=0.5	0/0/1/1	0|1	4	8.67993e-07	8.67993e-07	PEX14
1	10605796	C	2	A	18	AF=0.5	0/0/1/1	0|1	4	0.000402451	0.000402451	PEX14
1	10609395	C	1	T	14	AF=0.5	0/0/1/1	1|0	4	0.000976562	0.000976562	PEX14
1	10617359	T	1	C	12	AF=0.5	0/0/1/1	0|1	4	0.00341797	0.00341797	PEX14
1	10627619	C	27	T	13	AF=0.5	0/0/1/1	0|1	4	0.0384773	0.0384773	PEX14
1	10627701	A	4	G	26	AF=0.5	0/0/1/1	1|0	4	5.94761e-05	5.94761e-05	PEX14
1	10629133	C	0	A	21	AF=0.5	0/0/1/1	0|1	4	9.53674e-07	9.53674e-07	PEX14
1	10636853	C	1	T	10	AF=0.5	0/0/1/1	1|0	4	0.0117188	0.0117188	PEX14
1	10654369	A	0	G	32	AF=0.5	0/0/1/1	1|0	4	4.65661e-10	4.65661e-10	PEX14
1	11737413	C	7	A	21	AF=0.5	0/0/1/1	1|0	4	0.012541	0.012541	MAD2L2
1	11801023	T	2	C	17	AF=0.5	0/0/1/1	0|1	4	0.000728607	0.000728607	AGTRAP
1	11802434	G	1	T	13	AF=0.5	0/0/1/1	1|0	4	0.00183105	0.00183105	AGTRAP
1	11803080	G	2	A	20	AF=0.5	0/0/1/1	0|1	4	0.000121117	0.000121117	AGTRAP
1	11804288	C	23	T	5	AF=0.5	0/0/1/1	0|1	4	0.000912234	0.000912234	AGTRAP
1	11807970	A	0	G	11	AF=0.5	0/0/1/1	0|1	4	0.000976562	0.000976562	AGTRAP
1	11810674	G	102	A	44	AF=0.5	0/0/1/1	1|0	4	1.77047e-06	1.77047e-06	AGTRAP
1	11810691	C	115	T	59	AF=0.5	0/0/1/1	1|0	4	2.62816e-05	2.62816e-05	AGTRAP
1	11852300	C	0	T	17	AF=0.5	0/0/1/1	0|1	4	1.52588e-05	1.52588e-05	MTHFR
1	11854755	G	18	A	6	AF=0.5	0/0/1/1	1|0	4	0.0226558	0.0226558	MTHFR
1	11857788	G	10	A	24	AF=0.5	0/0/1/1	0|1	4	0.0243065	0.0243065	MTHFR
1	11857925	C	4	A	18	AF=0.5	0/0/1/1	0|1	4	0.00434351	0.00434351	MTHFR
1	11857926	G	4	A	18	AF=0.5	0/0/1/1	0|1	4	0.00434351	0.00434351	MTHFR
1	11857951	T	22	C	9	AF=0.5	0/0/1/1	1|0	4	0.0294494	0.0294494	MTHFR
1	11858550	C	19	T	37	AF=0.5	0/0/1/1	0|1	4	0.0222414	0.0222414	MTHFR
1	11860683	T	16	C	61	AF=0.5	0/0/1/1	1|0	4	2.41763e-07	2.41763e-07	MTHFR
1	11864168	T	55	A	28	AF=0.5	0/0/1/1	0|1	4	0.00403921	0.00403921	MTHFR
1	11889468	A	19	G	4	AF=0.5	0/0/1/1	0|1	4	0.00259948	0.00259948	CLCN6
1	11890674	T	3	G	19	AF=0.5	0/0/1/1	0|1	4	0.000855446	0.000855446	CLCN6
1	11890695	C	3	T	19	AF=0.5	0/0/1/1	0|1	4	0.000855446	0.000855446	CLCN6
1	11900838	A	43	G	120	AF=0.5	0/0/1/1	0|1	4	1.30436e-09	1.30436e-09	CLCN6, NPPA-AS1
1	11903471	C	0	T	26	AF=0.5	0/0/1/1	0|1	4	2.98023e-08	2.98023e-08	NPPA-AS1
1	11968078	C	0	G	13	AF=0.5	0/0/1/1	1|0	4	0.000244141	0.000244141	None
1	12144219	A	0	G	10	AF=0.5	0/0/1/1	1|0	4	0.00195312	0.00195312	TNFRSF8
1	12164437	C	44	T	86	AF=0.5	0/0/1/1	0|1	4	0.000289549	0.000289549	TNFRSF8
1	12175818	A	0	G	15	AF=0.5	0/0/1/1	0|1	4	6.10352e-05	6.10352e-05	TNFRSF8
1	12180805	C	2	T	10	AF=0.5	0/0/1/1	0|1	4	0.0385742	0.0385742	TNFRSF8
1	12337667	C	41	T	76	AF=0.5	0/0/1/1	1|0	4	0.0015572	0.0015572	VPS13D
1	12442894	A	0	T	22	AF=0.5	0/0/1/1	0|1	4	4.76837e-07	4.76837e-07	VPS13D
1	12639795	C	13	A	77	AF=0.5	0/0/1/1	0|1	4	3.17528e-12	3.17528e-12	DHRS3
1	12640081	T	11	C	26	AF=0.5	0/0/1/1	0|1	4	0.0200739	0.0200739	DHRS3
1	12640650	C	168	T	371	AF=0.5	0/0/1/1	0|1	4	1.28854e-18	1.28854e-18	DHRS3
1	12660342	G	7	A	21	AF=0.5	0/0/1/1	0|1	4	0.012541	0.012541	DHRS3
1	12663958	C	0	T	25	AF=0.5	0/0/1/1	0|1	4	5.96046e-08	5.96046e-08	DHRS3
1	12668321	C	19	G	5	AF=0.5	0/0/1/1	0|1	4	0.00661075	0.00661075	DHRS3
1	12671229	T	10	C	30	AF=0.5	0/0/1/1	0|1	4	0.00222143	0.00222143	DHRS3
1	12671685	G	24	C	70	AF=0.5	0/0/1/1	0|1	4	2.20276e-06	2.20276e-06	DHRS3
1	12672149	C	3	T	14	AF=0.5	0/0/1/1	0|1	4	0.0127258	0.0127258	DHRS3
1	12672536	G	6	C	44	AF=0.5	0/0/1/1	0|1	4	3.24374e-08	3.24374e-08	DHRS3
1	12672625	T	19	C	40	AF=0.5	0/0/1/1	0|1	4	0.0086415	0.0086415	DHRS3
1	12672835	A	0	G	32	AF=0.5	0/0/1/1	0|1	4	4.65661e-10	4.65661e-10	DHRS3
1	12676205	C	69	T	105	AF=0.5	0/0/1/1	0|1	4	0.00778793	0.00778793	DHRS3
1	14101978	C	1	T	13	AF=0.5	0/0/1/1	1|0	4	0.00183105	0.00183105	PRDM2
1	15089952	A	0	C	11	AF=0.5	0/0/1/1	1|0	4	0.000976562	0.000976562	KAZN
1	15090339	A	19	G	4	AF=0.5	0/0/1/1	1|0	4	0.00259948	0.00259948	KAZN
1	15090458	T	19	G	5	AF=0.5	0/0/1/1	1|0	4	0.00661075	0.00661075	KAZN
1	15090462	G	19	C	5	AF=0.5	0/0/1/1	1|0	4	0.00661075	0.00661075	KAZN
1	15094506	G	468	A	244	AF=0.5	0/0/1/1	1|0	4	3.54268e-17	3.54268e-17	KAZN
1	15095806	T	475	A	340	AF=0.5	0/0/1/1	1|0	4	2.55102e-06	2.55102e-06	KAZN
1	15096222	C	314	G	412	AF=0.5	0/0/1/1	0|1	4	0.000312175	0.000312175	KAZN
1	15096607	A	153	G	270	AF=0.5	0/0/1/1	0|1	4	1.38434e-08	1.38434e-08	KAZN
1	15098043	T	98	G	49	AF=0.5	0/0/1/1	0|1	4	6.51753e-05	6.51753e-05	KAZN
1	15099523	C	46	T	28	AF=0.5	0/0/1/1	1|0	4	0.047393	0.047393	KAZN
1	15541607	T	7	C	18	AF=0.5	0/0/1/1	0|1	4	0.0432853	0.0432853	TMEM51
1	15739697	A	0	C	16	AF=0.5	0/0/1/1	0|1	4	3.05176e-05	3.05176e-05	EFHD2
1	15743884	A	0	C	33	AF=0.5	0/0/1/1	0|1	4	2.32831e-10	2.32831e-10	EFHD2
1	15752716	C	32	T	15	AF=0.5	0/0/1/1	0|1	4	0.0186238	0.0186238	EFHD2
1	15755248	C	329	T	384	AF=0.5	0/0/1/1	1|0	4	0.0430683	0.0430683	EFHD2
1	15813969	A	2	C	11	AF=0.5	0/0/1/1	1|0	4	0.0224609	0.0224609	CELA2B
1	15833908	C	40	T	13	AF=0.5	0/0/1/1	1|0	4	0.00026854	0.00026854	CASP9
1	15834297	G	0	A	26	AF=0.5	0/0/1/1	1|0	4	2.98023e-08	2.98023e-08	CASP9
1	15835472	C	0	T	11	AF=0.5	0/0/1/1	1|0	4	0.000976562	0.000976562	CASP9
1	15838875	T	1	C	19	AF=0.5	0/0/1/1	1|0	4	4.00543e-05	4.00543e-05	CASP9
1	15841742	G	0	A	19	AF=0.5	0/0/1/1	1|0	4	3.8147e-06	3.8147e-06	CASP9
1	15853650	A	0	G	21	AF=0.5	0/0/1/1	1|0	4	9.53674e-07	9.53674e-07	DNAJC16
1	15946233	C	15	T	4	AF=0.5	0/0/1/1	1|0	4	0.0192108	0.0192108	DDI2
1	16173814	G	0	C	25	AF=0.5	0/0/1/1	1|0	4	5.96046e-08	5.96046e-08	FLJ37453
1	16200163	A	52	G	29	AF=0.5	0/0/1/1	0|1	4	0.0139995	0.0139995	SPEN
1	16240949	C	1	T	9	AF=0.5	0/0/1/1	0|1	4	0.0214844	0.0214844	SPEN
1	16263452	A	0	G	11	AF=0.5	0/0/1/1	0|1	4	0.000976562	0.000976562	SPEN
1	16265422	A	7	G	22	AF=0.5	0/0/1/1	0|1	4	0.00813006	0.00813006	SPEN
1	16271260	G	26	A	67	AF=0.5	0/0/1/1	0|1	4	2.52582e-05	2.52582e-05	ZBTB17
1	16272250	A	70	G	172	AF=0.5	0/0/1/1	0|1	4	4.37197e-11	4.37197e-11	ZBTB17
1	16272409	C	0	T	15	AF=0.5	0/0/1/1	0|1	4	6.10352e-05	6.10352e-05	ZBTB17
1	16525056	G	56	T	26	AF=0.5	0/0/1/1	0|1	4	0.00122038	0.00122038	ARHGEF19
1	16563635	A	2	G	22	AF=0.5	0/0/1/1	1|0	4	3.5882e-05	3.5882e-05	RSG1
1	16575024	G	4	A	13	AF=0.5	0/0/1/1	0|1	4	0.0490417	0.0490417	None
1	16641899	C	99	T	66	AF=0.5	0/0/1/1	1|0	4	0.0124956	0.0124956	FBXO42
1	16723084	G	277	A	170	AF=0.5	0/0/1/1	1|0	4	4.73726e-07	4.73726e-07	AL832937, SPATA21, SZRD1
1	16729608	A	0	G	16	AF=0.5	0/0/1/1	1|0	4	3.05176e-05	3.05176e-05	SPATA21
1	16777812	G	34	C	10	AF=0.5	0/0/1/1	1|0	4	0.000388131	0.000388131	NECAP2
1	16781879	A	27	G	9	AF=0.5	0/0/1/1	1|0	4	0.00393317	0.00393317	NECAP2
1	16799578	G	0	A	11	AF=0.5	0/0/1/1	1|0	4	0.000976562	0.000976562	CROCCP3
1	16930034	C	13	G	7	AF=0.75	0/1/1/1	0/1	4	0.263176	0.000183704	NBPF1
1	16931735	G	7	A	19	AF=0.5	0/0/1/1	0/1	4	0.0289593	0.0289593	NBPF1
1	16932051	T	14	A	12	AF=0.25	0/0/0/1	1|0	4	0.845019	0.0209241	NBPF1
1	16935777	A	0	G	18	AF=0.5	0/0/1/1	0|1	4	7.62939e-06	7.62939e-06	NBPF1
1	16935781	G	0	T	18	AF=0.5	0/0/1/1	0|1	4	7.62939e-06	7.62939e-06	NBPF1
1	16941974	A	0	G	18	AF=0.75	0/1/1/1	0/1	4	7.62939e-06	0.0110595	None
1	16944124	C	0	A	10	AF=0.25	0/0/0/1	1|0	4	0.00195312	9.53674e-07	None
1	16952481	A	217	G	153	AF=0.5	0/0/1/1	0/1	4	0.00102904	0.00102904	CROCCP2
1	16957307	C	0	T	13	AF=0.25	0/0/0/1	0/1	4	0.000244141	1.49012e-08	CROCCP2, FLJ00313
1	16958589	G	4	A	7	AF=0.25	0/0/0/1	0/1	4	0.548828	0.00756121	CROCCP2, FLJ00313
1	16959602	C	237	T	161	AF=0.5	0/0/1/1	0/1	4	0.000163324	0.000163324	CROCCP2, FLJ00313
1	16963438	A	1	G	17	AF=0.25	0/0/0/1	0/1	4	0.000144958	8.00355e-10	CROCCP2, FLJ00313
1	17312558	A	0	C	10	AF=0.5	0/0/1/1	1|0	4	0.00195312	0.00195312	ATP13A2
1	17346620	G	3	C	28	AF=0.5	0/0/1/1	0|1	4	4.64916e-06	4.64916e-06	SDHB
1	17738167	T	45	C	19	AF=0.5	0/0/1/1	0|1	4	0.00156279	0.00156279	RCC2
1	18720372	G	19	T	35	AF=0.25	0/0/0/1	0|1	4	0.0402236	7.95454e-10	None
1	18720923	T	25	C	6	AF=0.5	0/0/1/1	1|0	4	0.00087791	0.00087791	None
1	18722801	G	0	A	26	AF=0.5	0/0/1/1	1|0	4	2.98023e-08	2.98023e-08	None
1	18722846	G	0	A	19	AF=0.5	0/0/1/1	1|0	4	3.8147e-06	3.8147e-06	None
1	19781724	C	0	G	11	AF=0.5	0/0/1/1	0|1	4	0.000976562	0.000976562	CAPZB
1	19811938	C	294	T	217	AF=0.5	0/0/1/1	0|1	4	0.00075788	0.00075788	CAPZB
1	19931367	G	15	T	52	AF=0.5	0/0/1/1	0|1	4	6.45907e-06	6.45907e-06	MINOS1, MINOS1-NBL1
1	19932633	G	100	T	60	AF=0.5	0/0/1/1	0|1	4	0.00195373	0.00195373	MINOS1, MINOS1-NBL1
1	19943823	C	55	A	20	AF=0.5	0/0/1/1	0|1	4	6.4949e-05	6.4949e-05	MINOS1, MINOS1-NBL1
1	19951404	A	16	G	73	AF=0.5	0/0/1/1	0|1	4	7.23736e-10	7.23736e-10	MINOS1, MINOS1-NBL1
1	20211558	C	0	G	11	AF=0.5	0/0/1/1	1|0	4	0.000976562	0.000976562	OTUD3
1	20211608	C	0	T	11	AF=0.5	0/0/1/1	1|0	4	0.000976562	0.000976562	OTUD3
1	20222360	G	0	A	17	AF=0.5	0/0/1/1	0|1	4	1.52588e-05	1.52588e-05	OTUD3
1	20236731	A	94	G	140	AF=0.5	0/0/1/1	0|1	4	0.00317911	0.00317911	OTUD3
1	20238860	C	30	G	8	AF=0.5	0/0/1/1	1|0	4	0.000471987	0.000471987	OTUD3
1	20826485	C	37	G	19	AF=0.5	0/0/1/1	1|0	4	0.0222414	0.0222414	MUL1
1	20970344	T	3	C	13	AF=0.5	0/0/1/1	1|0	4	0.0212708	0.0212708	PINK1
1	20977221	A	34	T	59	AF=0.5	0/0/1/1	1|0	4	0.0124006	0.0124006	PINK1
1	20977365	C	27	G	11	AF=0.5	0/0/1/1	1|0	4	0.013853	0.013853	PINK1
1	20977449	G	50	T	14	AF=0.5	0/0/1/1	1|0	4	7.06949e-06	7.06949e-06	PINK1
1	20977599	C	36	G	14	AF=0.5	0/0/1/1	1|0	4	0.00260217	0.00260217	PINK1
1	20978832	T	1136	C	919	AF=0.5	0/0/1/1	1|0	4	1.85101e-06	1.85101e-06	DDOST
1	20979818	A	25	T	12	AF=0.5	0/0/1/1	1|0	4	0.047031	0.047031	DDOST
1	21067051	C	2	T	16	AF=0.5	0/0/1/1	1|0	4	0.00131226	0.00131226	None
1	21070238	T	650	C	929	AF=0.5	0/0/1/1	0|1	4	2.31655e-12	2.31655e-12	HP1BP3
1	21080938	T	36	A	127	AF=0.5	0/0/1/1	0|1	4	4.23464e-13	4.23464e-13	HP1BP3
1	21081930	T	130	C	45	AF=0.5	0/0/1/1	1|0	4	9.17601e-11	9.17601e-11	HP1BP3
1	21083435	G	129	A	74	AF=0.5	0/0/1/1	1|0	4	0.000138182	0.000138182	HP1BP3
1	21090081	A	0	G	16	AF=0.5	0/0/1/1	1|0	4	3.05176e-05	3.05176e-05	HP1BP3
1	21097584	A	0	T	18	AF=0.5	0/0/1/1	0|1	4	7.62939e-06	7.62939e-06	HP1BP3
1	21201325	T	0	C	13	AF=0.5	0/0/1/1	1|0	4	0.000244141	0.000244141	EIF4G3
1	21216574	T	3	C	19	AF=0.5	0/0/1/1	0|1	4	0.000855446	0.000855446	EIF4G3
1	21374810	T	0	C	13	AF=0.5	0/0/1/1	1|0	4	0.000244141	0.000244141	EIF4G3
1	21417990	C	0	T	14	AF=0.5	0/0/1/1	0|1	4	0.00012207	0.00012207	EIF4G3
1	21443108	G	2	A	13	AF=0.5	0/0/1/1	0|1	4	0.00738525	0.00738525	EIF4G3
1	21448792	T	0	C	11	AF=0.5	0/0/1/1	1|0	4	0.000976562	0.000976562	EIF4G3
1	21492162	G	7	C	18	AF=0.5	0/0/1/1	0|1	4	0.0432853	0.0432853	EIF4G3
1	21492168	T	7	C	18	AF=0.5	0/0/1/1	0|1	4	0.0432853	0.0432853	EIF4G3
1	21493900	G	2	A	12	AF=0.5	0/0/1/1	1|0	4	0.0129395	0.0129395	EIF4G3
1	21544505	G	4	A	52	AF=0.5	0/0/1/1	0|1	4	1.10081e-11	1.10081e-11	ECE1
1	21544668	C	24	G	58	AF=0.5	0/0/1/1	0|1	4	0.000221964	0.000221964	ECE1
1	21544791	T	2	C	16	AF=0.5	0/0/1/1	0|1	4	0.00131226	0.00131226	ECE1
1	21546356	G	23	T	83	AF=0.5	0/0/1/1	0|1	4	3.78723e-09	3.78723e-09	ECE1
1	21559363	G	0	T	12	AF=0.5	0/0/1/1	0|1	4	0.000488281	0.000488281	ECE1
1	21559702	C	2	A	14	AF=0.5	0/0/1/1	0|1	4	0.00418091	0.00418091	ECE1
1	21560080	A	39	G	70	AF=0.5	0/0/1/1	0|1	4	0.00385411	0.00385411	ECE1
1	21568930	T	0	G	11	AF=0.5	0/0/1/1	0|1	4	0.000976562	0.000976562	ECE1
1	21671943	T	32	G	10	AF=0.75	0/1/1/1	1|0	4	0.000940674	4.98899e-12	ECE1
1	21673823	C	2	T	11	AF=0.5	0/0/1/1	1|0	4	0.0224609	0.0224609	None
1	21673851	G	0	A	15	AF=0.5	0/0/1/1	1|0	4	6.10352e-05	6.10352e-05	None
1	21674373	T	0	G	11	AF=0.5	0/0/1/1	1|0	4	0.000976562	0.000976562	None
1	21942379	G	0	C	14	AF=0.5	0/0/1/1	0|1	4	0.00012207	0.00012207	RAP1GAP
1	21942600	G	0	C	12	AF=0.5	0/0/1/1	0|1	4	0.000488281	0.000488281	RAP1GAP
1	21983567	A	0	T	10	AF=0.5	0/0/1/1	1|0	4	0.00195312	0.00195312	RAP1GAP
1	22006721	G	10	A	35	AF=0.5	0/0/1/1	1|0	4	0.000247088	0.000247088	USP48
1	22009660	G	37	A	19	AF=0.5	0/0/1/1	1|0	4	0.0222414	0.0222414	USP48
1	22018935	G	2	C	11	AF=0.5	0/0/1/1	0|1	4	0.0224609	0.0224609	USP48
1	22020567	T	0	C	13	AF=0.5	0/0/1/1	0|1	4	0.000244141	0.000244141	USP48
1	22048664	C	0	T	17	AF=0.5	0/0/1/1	1|0	4	1.52588e-05	1.52588e-05	USP48
1	22050466	A	372	T	277	AF=0.5	0/0/1/1	0|1	4	0.000219157	0.000219157	USP48
1	22051873	G	57	A	99	AF=0.5	0/0/1/1	1|0	4	0.000966133	0.000966133	USP48
1	22052070	C	57	A	32	AF=0.5	0/0/1/1	1|0	4	0.0105469	0.0105469	USP48
1	22072324	T	1	C	22	AF=0.5	0/0/1/1	0|1	4	5.72205e-06	5.72205e-06	USP48
1	22075825	G	44	C	15	AF=0.5	0/0/1/1	0|1	4	0.000203722	0.000203722	USP48
1	22080509	T	0	C	17	AF=0.5	0/0/1/1	0|1	4	1.52588e-05	1.52588e-05	USP48
1	22080594	T	6	C	23	AF=0.5	0/0/1/1	0|1	4	0.0023157	0.0023157	USP48
1	22082350	A	3	C	14	AF=0.5	0/0/1/1	0|1	4	0.0127258	0.0127258	USP48
1	22090256	C	1	T	9	AF=0.5	0/0/1/1	1|0	4	0.0214844	0.0214844	USP48
1	22098940	C	0	T	11	AF=0.5	0/0/1/1	1|0	4	0.000976562	0.000976562	USP48
1	22103564	C	0	T	13	AF=0.5	0/0/1/1	1|0	4	0.000244141	0.000244141	USP48
1	22110418	T	0	C	10	AF=0.5	0/0/1/1	1|0	4	0.00195312	0.00195312	None
1	22151807	G	1	C	13	AF=0.5	0/0/1/1	0|1	4	0.00183105	0.00183105	HSPG2
1	22151809	G	1	T	13	AF=0.5	0/0/1/1	0|1	4	0.00183105	0.00183105	HSPG2
1	22155353	G	8	A	49	AF=0.5	0/0/1/1	1|0	4	2.71685e-08	2.71685e-08	HSPG2
1	22179673	T	14	C	4	AF=0.5	0/0/1/1	0|1	4	0.0308838	0.0308838	HSPG2
1	22187470	G	2	C	27	AF=0.5	0/0/1/1	0|1	4	1.62423e-06	1.62423e-06	HSPG2
1	22193202	C	4	A	15	AF=0.5	0/0/1/1	1|0	4	0.0192108	0.0192108	HSPG2
1	22199245	C	67	T	37	AF=0.5	0/0/1/1	0|1	4	0.00423255	0.00423255	HSPG2
1	22201438	C	15	T	63	AF=0.5	0/0/1/1	0|1	4	3.74866e-08	3.74866e-08	HSPG2
1	22214046	C	47	T	80	AF=0.5	0/0/1/1	0|1	4	0.00433082	0.00433082	HSPG2
1	22214127	A	62	G	14	AF=0.5	0/0/1/1	1|0	4	2.32365e-08	2.32365e-08	HSPG2
1	22216279	C	0	T	11	AF=0.5	0/0/1/1	1|0	4	0.000976562	0.000976562	HSPG2
1	22216574	C	88	A	54	AF=0.5	0/0/1/1	0|1	4	0.00543009	0.00543009	HSPG2
1	22247498	C	25	T	9	AF=0.5	0/0/1/1	0|1	4	0.00904119	0.00904119	HSPG2
1	22248466	T	0	C	13	AF=0.5	0/0/1/1	0|1	4	0.000244141	0.000244141	HSPG2
1	22249836	C	2	T	10	AF=0.5	0/0/1/1	1|0	4	0.0385742	0.0385742	HSPG2
1	22251260	C	13	T	29	AF=0.5	0/0/1/1	1|0	4	0.0195205	0.0195205	HSPG2
1	22251891	C	5	T	25	AF=0.5	0/0/1/1	1|0	4	0.000324914	0.000324914	HSPG2
1	22353327	C	23	A	5	AF=0.5	0/0/1/1	1|0	4	0.000912234	0.000912234	LINC00339
1	22353414	G	2	A	27	AF=0.5	0/0/1/1	1|0	4	1.62423e-06	1.62423e-06	LINC00339
1	22353491	C	8	T	23	AF=0.5	0/0/1/1	1|0	4	0.0106738	0.0106738	LINC00339
1	22354274	G	19	C	5	AF=0.5	0/0/1/1	1|0	4	0.00661075	0.00661075	LINC00339
1	22354277	C	19	T	5	AF=0.5	0/0/1/1	1|0	4	0.00661075	0.00661075	LINC00339
1	22356888	G	82	A	159	AF=0.5	0/0/1/1	1|0	4	7.97653e-07	7.97653e-07	LINC00339
1	22356905	G	81	A	163	AF=0.5	0/0/1/1	1|0	4	1.66529e-07	1.66529e-07	LINC00339
1	22357488	C	35	A	16	AF=0.75	0/1/1/1	0|1	4	0.0109736	7.13188e-11	LINC00339
1	22422554	A	0	G	14	AF=0.5	0/0/1/1	1|0	4	0.00012207	0.00012207	None
1	22499255	G	0	T	14	AF=0.5	0/0/1/1	0|1	4	0.00012207	0.00012207	None
1	23346119	G	65	C	83	AF=0.25	0/0/0/1	0|1	4	0.162072	1.26037e-15	KDM1A
1	23369277	T	18	G	5	AF=0.5	0/0/1/1	0|1	4	0.010622	0.010622	KDM1A
1	23394062	G	1	A	11	AF=0.5	0/0/1/1	0|1	4	0.00634766	0.00634766	KDM1A
1	23407081	C	25	A	8	AF=0.5	0/0/1/1	1|0	4	0.00455138	0.00455138	KDM1A
1	23410138	T	5	G	384	AF=0.75	0/1/1/1	0/1	4	1.16247e-106	1.19219e-40	KDM1A
1	23614226	T	24	A	11	AF=0.5	0/0/1/1	1|0	4	0.0409596	0.0409596	None
1	23621746	T	6	A	26	AF=0.5	0/0/1/1	0|1	4	0.000535053	0.000535053	None
1	23763449	G	11	A	29	AF=0.5	0/0/1/1	1|0	4	0.00642658	0.00642658	ASAP3
1	23834486	G	9	A	29	AF=0.5	0/0/1/1	1|0	4	0.00165805	0.00165805	E2F2
1	23835794	A	23	G	68	AF=0.5	0/0/1/1	1|0	4	2.52215e-06	2.52215e-06	E2F2
1	23847464	C	39	A	17	AF=0.5	0/0/1/1	1|0	4	0.00456153	0.00456153	E2F2
1	24068544	T	17	C	6	AF=0.5	0/0/1/1	1|0	4	0.0346897	0.0346897	None
1	24139436	G	2	C	12	AF=0.5	0/0/1/1	0|1	4	0.0129395	0.0129395	HMGCL
1	24718075	T	41	C	21	AF=0.5	0/0/1/1	0|1	4	0.0151341	0.0151341	STPG1
1	24720003	A	0	G	19	AF=0.5	0/0/1/1	0|1	4	3.8147e-06	3.8147e-06	STPG1
1	24727678	C	0	T	21	AF=0.5	0/0/1/1	0|1	4	9.53674e-07	9.53674e-07	STPG1
1	24747682	C	20	T	6	AF=0.5	0/0/1/1	0|1	4	0.00935531	0.00935531	NIPAL3
1	24748829	A	2	G	10	AF=0.5	0/0/1/1	0|1	4	0.0385742	0.0385742	NIPAL3
1	24792617	T	5	A	19	AF=0.5	0/0/1/1	0|1	4	0.00661075	0.00661075	NIPAL3
1	24793480	T	0	C	11	AF=0.5	0/0/1/1	0|1	4	0.000976562	0.000976562	NIPAL3
1	24796838	A	60	G	30	AF=0.5	0/0/1/1	0|1	4	0.00206027	0.00206027	NIPAL3
1	24798001	G	0	A	27	AF=0.5	0/0/1/1	0|1	4	1.49012e-08	1.49012e-08	NIPAL3
1	24798383	C	70	T	39	AF=0.5	0/0/1/1	0|1	4	0.00385411	0.00385411	NIPAL3
1	24984973	G	5	A	18	AF=0.5	0/0/1/1	1|0	4	0.010622	0.010622	SRRM1
1	25169634	A	527	G	497	AF=0.75	0/1/1/1	1|0	4	0.364811	2.74745e-73	CLIC4, Z24749
1	25572984	T	260	G	383	AF=0.5	0/0/1/1	0|1	4	1.39861e-06	1.39861e-06	C1orf63
1	25580095	G	3	A	12	AF=0.5	0/0/1/1	0|1	4	0.0351562	0.0351562	C1orf63
1	25687308	C	324	G	512	AF=0.5	0/0/1/1	0|1	4	8.33984e-11	8.33984e-11	TMEM50A
1	25688276	A	79	G	133	AF=0.5	0/0/1/1	1|0	4	0.000254201	0.000254201	TMEM50A
1	25783066	A	18	G	35	AF=0.5	0/0/1/1	0|1	4	0.0270083	0.0270083	TMEM57
1	25787313	G	0	A	21	AF=0.5	0/0/1/1	0|1	4	9.53674e-07	9.53674e-07	TMEM57
1	25791404	A	0	T	10	AF=0.5	0/0/1/1	0|1	4	0.00195312	0.00195312	TMEM57
1	25800790	C	0	T	29	AF=0.5	0/0/1/1	0|1	4	3.72529e-09	3.72529e-09	TMEM57
1	25801409	C	0	T	28	AF=0.5	0/0/1/1	0|1	4	7.45058e-09	7.45058e-09	TMEM57
1	25821671	G	0	T	13	AF=0.5	0/0/1/1	0|1	4	0.000244141	0.000244141	TMEM57
1	25826502	A	35	G	62	AF=0.5	0/0/1/1	0|1	4	0.00795946	0.00795946	TMEM57
1	25877573	C	11	A	24	AF=0.5	0/0/1/1	1|0	4	0.0409596	0.0409596	LDLRAP1
1	25889632	T	147	C	57	AF=0.5	0/0/1/1	0|1	4	2.37527e-10	2.37527e-10	LDLRAP1
1	25889672	G	0	A	12	AF=0.5	0/0/1/1	0|1	4	0.000488281	0.000488281	LDLRAP1
1	25891174	G	0	A	11	AF=0.5	0/0/1/1	1|0	4	0.000976562	0.000976562	LDLRAP1
1	25892298	G	0	T	14	AF=0.5	0/0/1/1	1|0	4	0.00012207	0.00012207	LDLRAP1
1	25894853	G	100	T	171	AF=0.5	0/0/1/1	1|0	4	1.91061e-05	1.91061e-05	LDLRAP1
1	25895238	C	26	T	10	AF=0.5	0/0/1/1	1|0	4	0.011331	0.011331	LDLRAP1
1	25895406	C	0	T	19	AF=0.5	0/0/1/1	1|0	4	3.8147e-06	3.8147e-06	None
1	26232191	G	0	A	19	AF=0.5	0/0/1/1	0|1	4	3.8147e-06	3.8147e-06	STMN1
1	26286840	G	17	A	34	AF=0.5	0/0/1/1	1|0	4	0.0240929	0.0240929	PAFAH2
1	26362194	T	0	C	14	AF=0.5	0/0/1/1	0|1	4	0.00012207	0.00012207	EXTL1
1	26435919	C	0	T	10	AF=0.5	0/0/1/1	1|0	4	0.00195312	0.00195312	None
1	26436688	G	0	C	16	AF=0.5	0/0/1/1	1|0	4	3.05176e-05	3.05176e-05	None
1	26447335	T	0	C	13	AF=0.5	0/0/1/1	1|0	4	0.000244141	0.000244141	PDIK1L
1	26448447	A	93	G	145	AF=0.5	0/0/1/1	1|0	4	0.000908189	0.000908189	PDIK1L
1	26448849	T	106	C	68	AF=0.5	0/0/1/1	1|0	4	0.00488778	0.00488778	PDIK1L
1	26449337	A	0	G	43	AF=0.5	0/0/1/1	1|0	4	2.27374e-13	2.27374e-13	PDIK1L
1	26450009	C	202	T	67	AF=0.5	0/0/1/1	1|0	4	6.61866e-17	6.61866e-17	PDIK1L
1	26488947	C	6	T	20	AF=0.5	0/0/1/1	1|0	4	0.00935531	0.00935531	FAM110D
1	26496455	C	819	T	971	AF=0.5	0/0/1/1	0|1	4	0.000355638	0.000355638	ZNF593
1	26496651	T	1670	C	1433	AF=0.5	0/0/1/1	1|0	4	2.2495e-05	2.2495e-05	ZNF593
1	26498196	G	1	T	13	AF=0.5	0/0/1/1	1|0	4	0.00183105	0.00183105	None
1	26501044	A	19	G	6	AF=0.5	0/0/1/1	1|0	4	0.0146333	0.0146333	None
1	26504697	A	0	G	10	AF=0.5	0/0/1/1	1|0	4	0.00195312	0.00195312	CNKSR1
1	26504741	G	0	A	10	AF=0.5	0/0/1/1	1|0	4	0.00195312	0.00195312	CNKSR1
1	26504756	G	0	A	10	AF=0.5	0/0/1/1	1|0	4	0.00195312	0.00195312	CNKSR1
1	26556385	A	0	C	19	AF=0.5	0/0/1/1	1|0	4	3.8147e-06	3.8147e-06	None
1	26562304	C	5	A	31	AF=0.5	0/0/1/1	1|0	4	1.29135e-05	1.29135e-05	CEP85
1	26563105	G	0	A	22	AF=0.5	0/0/1/1	1|0	4	4.76837e-07	4.76837e-07	CEP85
1	26564230	C	26	A	7	AF=0.5	0/0/1/1	0|1	4	0.00131873	0.00131873	CEP85
1	26592310	C	0	T	14	AF=0.5	0/0/1/1	1|0	4	0.00012207	0.00012207	CEP85
1	26596080	G	280	A	342	AF=0.5	0/0/1/1	0|1	4	0.0143845	0.0143845	CEP85
1	26597673	G	63	A	113	AF=0.5	0/0/1/1	0|1	4	0.00020219	0.00020219	CEP85
1	26597781	C	89	T	59	AF=0.5	0/0/1/1	0|1	4	0.0168414	0.0168414	CEP85
1	26599542	G	83	A	48	AF=0.5	0/0/1/1	0|1	4	0.0028289	0.0028289	CEP85
1	26602251	C	4	T	10	AF=0.25	0/0/0/1	1|0	4	0.179565	0.000341874	CEP85
1	26602256	T	10	G	4	AF=0.75	0/1/1/1	0|1	4	0.179565	0.000341874	CEP85
1	26602525	C	0	T	11	AF=0.5	0/0/1/1	0|1	4	0.000976562	0.000976562	CEP85
1	26605069	T	385	C	454	AF=0.5	0/0/1/1	0|1	4	0.0188403	0.0188403	CEP85
1	26609259	C	132	T	50	AF=0.5	0/0/1/1	1|0	4	1.00787e-09	1.00787e-09	UBXN11
1	26613251	T	0	C	16	AF=0.5	0/0/1/1	0|1	4	3.05176e-05	3.05176e-05	UBXN11
1	26646726	A	340	G	252	AF=0.5	0/0/1/1	1|0	4	0.000341422	0.000341422	CD52
1	26648381	C	0	T	12	AF=0.5	0/0/1/1	0|1	4	0.000488281	0.000488281	AIM1L
1	26759149	A	22	G	8	AF=0.5	0/0/1/1	1|0	4	0.0161248	0.0161248	DHDDS
1	26801229	C	54	A	84	AF=0.5	0/0/1/1	0|1	4	0.0132732	0.0132732	HMGN2
1	26825116	C	17	T	4	AF=0.5	0/0/1/1	1|0	4	0.00719738	0.00719738	None
1	26883450	G	0	C	21	AF=0.5	0/0/1/1	1|0	4	9.53674e-07	9.53674e-07	RPS6KA1
1	26898142	A	0	G	11	AF=0.5	0/0/1/1	1|0	4	0.000976562	0.000976562	RPS6KA1
1	27027324	C	1	T	42	AF=0.5	0/0/1/1	1|0	4	1.00044e-11	1.00044e-11	ARID1A
1	27159429	C	0	T	13	AF=0.5	0/0/1/1	1|0	4	0.000244141	0.000244141	BC016143, ZDHHC18
1	27206828	A	75	G	47	AF=0.5	0/0/1/1	1|0	4	0.0141705	0.0141705	BC016143, GPN2
1	27209439	A	49	G	72	AF=0.5	0/0/1/1	1|0	4	0.0450517	0.0450517	BC016143, GPN2
1	27210721	T	86	C	60	AF=0.5	0/0/1/1	1|0	4	0.0381794	0.0381794	BC016143, GPN2
1	27248273	C	719	A	843	AF=0.5	0/0/1/1	1|0	4	0.00184805	0.00184805	BC016143, NUDC
1	27479242	G	0	A	22	AF=0.5	0/0/1/1	0|1	4	4.76837e-07	4.76837e-07	SLC9A1
1	27479287	C	0	A	22	AF=0.5	0/0/1/1	0|1	4	4.76837e-07	4.76837e-07	SLC9A1
1	27577979	G	0	C	13	AF=0.5	0/0/1/1	1|0	4	0.000244141	0.000244141	WDTC1
1	27651563	G	37	A	6	AF=0.5	0/0/1/1	0|1	4	1.63612e-06	1.63612e-06	LOC644961, TMEM222
1	27786334	T	0	C	13	AF=0.5	0/0/1/1	0|1	4	0.000244141	0.000244141	WASF2
1	27873845	G	20	A	4	AF=0.5	0/0/1/1	0|1	4	0.00154388	0.00154388	AHDC1
1	27876482	C	15	A	39	AF=0.5	0/0/1/1	1|0	4	0.00149626	0.00149626	AHDC1
1	28209305	A	4	G	34	AF=0.5	0/0/1/1	1|0	4	6.03854e-07	6.03854e-07	THEMIS2
1	28522547	T	0	C	24	AF=0.5	0/0/1/1	0|1	4	1.19209e-07	1.19209e-07	None
1	28527011	A	47	G	16	AF=0.5	0/0/1/1	0|1	4	0.000117055	0.000117055	DNAJC8
1	28535233	T	28	C	48	AF=0.5	0/0/1/1	0|1	4	0.0286267	0.0286267	DNAJC8
1	28538484	T	1	C	10	AF=0.5	0/0/1/1	0|1	4	0.0117188	0.0117188	DNAJC8
1	28546258	A	1	G	10	AF=0.5	0/0/1/1	0|1	4	0.0117188	0.0117188	DNAJC8
1	28559232	T	0	C	18	AF=0.5	0/0/1/1	0|1	4	7.62939e-06	7.62939e-06	DNAJC8
1	28563774	A	113	G	210	AF=0.5	0/0/1/1	1|0	4	7.4158e-08	7.4158e-08	ATPIF1
1	28564252	A	326	G	211	AF=0.5	0/0/1/1	0|1	4	7.91424e-07	7.91424e-07	ATPIF1
1	28564279	A	443	G	251	AF=0.5	0/0/1/1	0|1	4	2.95506e-13	2.95506e-13	ATPIF1
1	28566608	G	39	T	20	AF=0.5	0/0/1/1	0|1	4	0.0183371	0.0183371	None
1	28567075	C	21	T	7	AF=0.5	0/0/1/1	0|1	4	0.012541	0.012541	None
1	28570349	G	0	A	16	AF=0.5	0/0/1/1	0|1	4	3.05176e-05	3.05176e-05	None
1	28800629	A	96	G	50	AF=0.5	0/0/1/1	0|1	4	0.000175033	0.000175033	PHACTR4
1	29220178	G	0	A	16	AF=0.5	0/0/1/1	0|1	4	3.05176e-05	3.05176e-05	EPB41
1	29249526	C	0	G	23	AF=0.5	0/0/1/1	1|0	4	2.38419e-07	2.38419e-07	EPB41
1	29385648	G	28	A	5	AF=0.5	0/0/1/1	0|1	4	6.61877e-05	6.61877e-05	EPB41
1	29439016	T	2	A	11	AF=0.5	0/0/1/1	0|1	4	0.0224609	0.0224609	EPB41
1	29445227	T	423	C	616	AF=0.5	0/0/1/1	1|0	4	2.32629e-09	2.32629e-09	EPB41
1	29445598	A	198	G	279	AF=0.5	0/0/1/1	1|0	4	0.000241626	0.000241626	EPB41
1	29475975	G	19	A	45	AF=0.5	0/0/1/1	0|1	4	0.00156279	0.00156279	SRSF4
1	29480342	A	0	G	12	AF=0.5	0/0/1/1	1|0	4	0.000488281	0.000488281	SRSF4
1	29488290	T	5	C	7	AF=0.25	0/0/0/1	1|0	4	0.774414	0.0142528	SRSF4
1	29493866	T	47	C	10	AF=0.5	0/0/1/1	0|1	4	7.51304e-07	7.51304e-07	SRSF4
1	29494019	C	25	T	46	AF=0.5	0/0/1/1	1|0	4	0.0169947	0.0169947	SRSF4
1	31195108	G	15	A	35	AF=0.5	0/0/1/1	1|0	4	0.00660045	0.00660045	MATN1, MATN1-AS1
1	31197401	C	40	T	18	AF=0.5	0/0/1/1	1|0	4	0.00535486	0.00535486	MATN1-AS1
1	31198733	A	46	G	28	AF=0.5	0/0/1/1	1|0	4	0.047393	0.047393	MATN1-AS1
1	31201899	G	2	A	10	AF=0.5	0/0/1/1	0|1	4	0.0385742	0.0385742	None
1	31205796	T	151	C	212	AF=0.5	0/0/1/1	1|0	4	0.00160117	0.00160117	LAPTM5
1	31732892	G	743	A	624	AF=0.5	0/0/1/1	0|1	4	0.0014065	0.0014065	SNRNP40
1	31740668	C	43	T	11	AF=0.5	0/0/1/1	1|0	4	1.40131e-05	1.40131e-05	SNRNP40
1	31742629	T	3	A	20	AF=0.5	0/0/1/1	0|1	4	0.000488281	0.000488281	SNRNP40
1	31744168	G	3	A	22	AF=0.5	0/0/1/1	1|0	4	0.000156522	0.000156522	SNRNP40
1	31758467	C	30	T	6	AF=0.5	0/0/1/1	0|1	4	6.96017e-05	6.96017e-05	SNRNP40
1	31761056	A	13	G	30	AF=0.5	0/0/1/1	0|1	4	0.0137182	0.0137182	SNRNP40
1	31761703	C	24	A	47	AF=0.5	0/0/1/1	0|1	4	0.00855454	0.00855454	SNRNP40
1	31761936	T	23	A	75	AF=0.5	0/0/1/1	1|0	4	1.31722e-07	1.31722e-07	SNRNP40
1	31763787	T	1	C	12	AF=0.5	0/0/1/1	1|0	4	0.00341797	0.00341797	SNRNP40
1	31766956	A	1	G	9	AF=0.5	0/0/1/1	1|0	4	0.0214844	0.0214844	SNRNP40
1	31769025	T	0	C	12	AF=0.5	0/0/1/1	1|0	4	0.000488281	0.000488281	SNRNP40
1	31801112	G	0	A	22	AF=0.5	0/0/1/1	1|0	4	4.76837e-07	4.76837e-07	ZCCHC17
1	31829873	C	0	T	20	AF=0.5	0/0/1/1	0|1	4	1.90735e-06	1.90735e-06	ZCCHC17
1	31830879	G	0	A	16	AF=0.5	0/0/1/1	0|1	4	3.05176e-05	3.05176e-05	ZCCHC17
1	31831178	T	1	G	10	AF=0.5	0/0/1/1	0|1	4	0.0117188	0.0117188	ZCCHC17
1	31837089	T	396	C	310	AF=0.25	0/0/0/1	0|1	4	0.0013623	9.04457e-28	ZCCHC17
1	31837683	C	57	A	32	AF=0.5	0/0/1/1	0|1	4	0.0105469	0.0105469	ZCCHC17
1	31838253	C	0	T	30	AF=0.5	0/0/1/1	0|1	4	1.86265e-09	1.86265e-09	FABP3
1	31840426	C	0	G	13	AF=0.5	0/0/1/1	1|0	4	0.000244141	0.000244141	FABP3
1	31898234	T	0	C	16	AF=0.5	0/0/1/1	1|0	4	3.05176e-05	3.05176e-05	SERINC2
1	32096746	T	1	C	16	AF=0.5	0/0/1/1	0|1	4	0.000274658	0.000274658	AX747565, HCRTR1, PEF1
1	32096815	T	0	C	40	AF=0.5	0/0/1/1	0|1	4	1.81899e-12	1.81899e-12	AX747565, HCRTR1, PEF1
1	32096918	T	0	C	14	AF=0.5	0/0/1/1	0|1	4	0.00012207	0.00012207	AX747565, HCRTR1, PEF1
1	32097088	G	0	T	19	AF=0.5	0/0/1/1	0|1	4	3.8147e-06	3.8147e-06	AX747565, HCRTR1, PEF1
1	32487672	G	0	A	11	AF=0.5	0/0/1/1	1|0	4	0.000976562	0.000976562	KHDRBS1
1	32677653	C	0	T	11	AF=0.5	0/0/1/1	0|1	4	0.000976562	0.000976562	DCDC2B
1	32682021	C	33	T	17	AF=0.5	0/0/1/1	0|1	4	0.0328391	0.0328391	TMEM234
1	33227593	T	0	A	12	AF=0.5	0/0/1/1	1|0	4	0.000488281	0.000488281	KIAA1522
1	33240596	G	5	T	28	AF=0.5	0/0/1/1	1|0	4	6.61877e-05	6.61877e-05	None
1	33250684	A	15	T	32	AF=0.5	0/0/1/1	1|0	4	0.0186238	0.0186238	YARS
1	33254943	T	28	C	5	AF=0.5	0/0/1/1	1|0	4	6.61877e-05	6.61877e-05	YARS
1	33257318	A	7	G	22	AF=0.5	0/0/1/1	1|0	4	0.00813006	0.00813006	YARS
1	33257919	A	21	G	5	AF=0.5	0/0/1/1	0|1	4	0.00249392	0.00249392	YARS
1	33261506	T	39	C	9	AF=0.5	0/0/1/1	1|0	4	1.52218e-05	1.52218e-05	YARS
1	33286484	C	16	T	32	AF=0.5	0/0/1/1	1|0	4	0.0293049	0.0293049	S100PBP
1	33314700	G	1	A	22	AF=0.5	0/0/1/1	0|1	4	5.72205e-06	5.72205e-06	S100PBP
1	33321796	G	133	A	69	AF=0.5	0/0/1/1	0|1	4	7.89442e-06	7.89442e-06	S100PBP
1	33324088	C	137	G	77	AF=0.5	0/0/1/1	1|0	4	4.95334e-05	4.95334e-05	S100PBP
1	33404367	C	23	T	5	AF=0.5	0/0/1/1	1|0	4	0.000912234	0.000912234	RNF19B
1	33418984	G	0	A	12	AF=0.5	0/0/1/1	1|0	4	0.000488281	0.000488281	RNF19B
1	33765854	C	0	T	12	AF=0.5	0/0/1/1	1|0	4	0.000488281	0.000488281	ZNF362
1	33801706	T	2	C	14	AF=0.5	0/0/1/1	0|1	4	0.00418091	0.00418091	PHC2
1	33802936	A	1	G	10	AF=0.5	0/0/1/1	0|1	4	0.0117188	0.0117188	PHC2
1	33825300	G	0	A	21	AF=0.5	0/0/1/1	1|0	4	9.53674e-07	9.53674e-07	PHC2
1	35306494	C	1	T	20	AF=0.5	0/0/1/1	1|0	4	2.09808e-05	2.09808e-05	None
1	35317388	T	15	C	3	AF=0.5	0/0/1/1	0|1	4	0.00753784	0.00753784	SMIM12
1	35317414	C	3	G	27	AF=0.5	0/0/1/1	1|0	4	8.43033e-06	8.43033e-06	SMIM12
1	35319610	A	0	C	21	AF=0.5	0/0/1/1	0/1	4	9.53674e-07	9.53674e-07	SMIM12
1	35319681	T	34	C	8	AF=0.5	0/0/1/1	0|1	4	6.87711e-05	6.87711e-05	SMIM12
1	35320690	T	69	G	34	AF=0.5	0/0/1/1	0|1	4	0.000727571	0.000727571	SMIM12
1	35567813	A	1	G	20	AF=0.5	0/0/1/1	0|1	4	2.09808e-05	2.09808e-05	ZMYM1
1	36007727	G	0	A	11	AF=0.5	0/0/1/1	0|1	4	0.000976562	0.000976562	KIAA0319L
1	36388080	A	114	G	57	AF=0.5	0/0/1/1	0|1	4	1.55961e-05	1.55961e-05	AGO1
1	36451061	G	37	A	79	AF=0.5	0/0/1/1	1|0	4	0.000120344	0.000120344	AGO3
1	36460163	G	0	A	13	AF=0.5	0/0/1/1	0|1	4	0.000244141	0.000244141	AGO3
1	36613380	A	1	G	10	AF=0.5	0/0/1/1	1|0	4	0.0117188	0.0117188	TRAPPC3
1	36614713	C	80	G	52	AF=0.5	0/0/1/1	1|0	4	0.0184306	0.0184306	TRAPPC3
1	36627542	C	0	T	21	AF=0.5	0/0/1/1	1|0	4	9.53674e-07	9.53674e-07	MAP7D1
1	36642420	T	137	C	101	AF=0.5	0/0/1/1	1|0	4	0.0230847	0.0230847	MAP7D1
1	36690599	A	7	G	62	AF=0.5	0/0/1/1	0|1	4	4.1028e-12	4.1028e-12	THRAP3
1	36690870	C	31	A	10	AF=0.5	0/0/1/1	0|1	4	0.00145049	0.00145049	THRAP3
1	36700181	G	0	A	12	AF=0.5	0/0/1/1	1|0	4	0.000488281	0.000488281	THRAP3
1	36751209	A	2	G	24	AF=0.75	0/1/1/1	0|1	4	1.04904e-05	0.0413055	THRAP3
1	36766138	C	0	T	14	AF=0.5	0/0/1/1	1|0	4	0.00012207	0.00012207	THRAP3
1	36766975	G	13	C	40	AF=0.5	0/0/1/1	1|0	4	0.00026854	0.00026854	THRAP3
1	36775658	C	0	G	13	AF=0.5	0/0/1/1	1|0	4	0.000244141	0.000244141	SH3D21
1	36790626	A	0	G	24	AF=0.5	0/0/1/1	1|0	4	1.19209e-07	1.19209e-07	None
1	36794192	C	3	T	26	AF=0.5	0/0/1/1	1|0	4	1.52364e-05	1.52364e-05	None
1	36798891	C	2	T	11	AF=0.5	0/0/1/1	0|1	4	0.0224609	0.0224609	None
1	36815492	G	1	A	14	AF=0.5	0/0/1/1	0|1	4	0.000976562	0.000976562	STK40
1	36816096	G	27	A	8	AF=0.5	0/0/1/1	0|1	4	0.00187823	0.00187823	STK40
1	36833080	A	0	G	12	AF=0.5	0/0/1/1	0|1	4	0.000488281	0.000488281	STK40
1	36833256	T	0	A	12	AF=0.5	0/0/1/1	0|1	4	0.000488281	0.000488281	STK40
1	36840265	T	0	C	12	AF=0.5	0/0/1/1	0|1	4	0.000488281	0.000488281	STK40
1	36860326	A	4	G	7	AF=0.25	0/0/0/1	0|1	4	0.548828	0.00756121	LSM10
1	36860742	G	0	A	25	AF=0.5	0/0/1/1	0|1	4	5.96046e-08	5.96046e-08	LSM10
1	36860800	A	0	T	20	AF=0.5	0/0/1/1	0|1	4	1.90735e-06	1.90735e-06	LSM10
1	36860826	G	0	A	20	AF=0.5	0/0/1/1	0|1	4	1.90735e-06	1.90735e-06	LSM10
1	36863523	A	50	G	14	AF=0.5	0/0/1/1	0|1	4	7.06949e-06	7.06949e-06	None
1	36922959	T	25	C	8	AF=0.5	0/0/1/1	0|1	4	0.00455138	0.00455138	MRPS15
1	36927733	G	826	A	1047	AF=0.5	0/0/1/1	0|1	4	3.59879e-07	3.59879e-07	MRPS15
1	37873499	C	0	A	15	AF=0.5	0/0/1/1	1|0	4	6.10352e-05	6.10352e-05	None
1	37921066	G	0	A	11	AF=0.5	0/0/1/1	1|0	4	0.000976562	0.000976562	LOC728431
1	37921082	A	2	G	10	AF=0.5	0/0/1/1	1|0	4	0.0385742	0.0385742	LOC728431
1	37958389	A	28	G	11	AF=0.5	0/0/1/1	1|0	4	0.0094753	0.0094753	MEAF6
1	37958451	C	74	G	15	AF=0.5	0/0/1/1	1|0	4	1.53421e-10	1.53421e-10	MEAF6
1	37958813	C	45	G	7	AF=0.5	0/0/1/1	1|0	4	6.97381e-08	6.97381e-08	MEAF6
1	37961613	A	27	G	49	AF=0.5	0/0/1/1	1|0	4	0.0154403	0.0154403	MEAF6
1	38164880	C	34	G	73	AF=0.5	0/0/1/1	0|1	4	0.000206375	0.000206375	CDCA8
1	38268918	T	393	C	275	AF=0.5	0/0/1/1	0|1	4	5.67909e-06	5.67909e-06	YRDC
1	38275802	T	11	C	24	AF=0.5	0/0/1/1	0|1	4	0.0409596	0.0409596	MTF1
1	38326654	A	129	G	198	AF=0.5	0/0/1/1	0|1	4	0.000161166	0.000161166	INPP5B
1	38327982	G	94	T	146	AF=0.5	0/0/1/1	0|1	4	0.000954974	0.000954974	INPP5B
1	38338795	A	86	G	50	AF=0.5	0/0/1/1	0|1	4	0.00255873	0.00255873	INPP5B
1	38391070	G	0	A	13	AF=0.5	0/0/1/1	1|0	4	0.000244141	0.000244141	INPP5B
1	38397369	C	11	T	34	AF=0.5	0/0/1/1	0|1	4	0.000824082	0.000824082	INPP5B
1	38411445	G	9	A	23	AF=0.5	0/0/1/1	0|1	4	0.0200616	0.0200616	INPP5B
1	38444749	T	0	C	10	AF=0.5	0/0/1/1	1|0	4	0.00195312	0.00195312	SF3A3
1	38446986	G	0	A	13	AF=0.5	0/0/1/1	0|1	4	0.000244141	0.000244141	SF3A3
1	38452581	A	0	G	15	AF=0.5	0/0/1/1	1|0	4	6.10352e-05	6.10352e-05	SF3A3
1	38454569	T	17	A	6	AF=0.5	0/0/1/1	1|0	4	0.0346897	0.0346897	SF3A3
1	38455891	G	12	C	36	AF=0.5	0/0/1/1	0|1	4	0.00071727	0.00071727	None
1	38461319	C	73	A	35	AF=0.5	0/0/1/1	0|1	4	0.000325839	0.000325839	None
1	38470782	A	18	G	5	AF=0.5	0/0/1/1	1|0	4	0.010622	0.010622	FHL3
1	38480706	T	2	C	22	AF=0.5	0/0/1/1	0|1	4	3.5882e-05	3.5882e-05	UTP11L
1	38480930	A	38	G	11	AF=0.5	0/0/1/1	1|0	4	0.000141971	0.000141971	UTP11L
1	39278454	G	0	A	13	AF=0.5	0/0/1/1	0|1	4	0.000244141	0.000244141	None
1	39570999	C	0	T	11	AF=0.5	0/0/1/1	1|0	4	0.000976562	0.000976562	MACF1
1	39626312	C	0	T	11	AF=0.25	0/0/0/1	0/1	4	0.000976562	2.38419e-07	MACF1
1	39748921	G	110	A	80	AF=0.5	0/0/1/1	1|0	4	0.0351119	0.0351119	MACF1
1	39809284	C	0	T	13	AF=0.5	0/0/1/1	1|0	4	0.000244141	0.000244141	MACF1
1	39814960	C	2	T	74	AF=0.5	0/0/1/1	0|1	4	7.7477e-20	7.7477e-20	MACF1
1	39815143	T	14	A	43	AF=0.5	0/0/1/1	0|1	4	0.000153889	0.000153889	MACF1
1	39908506	G	163	A	218	AF=0.5	0/0/1/1	0|1	4	0.00559603	0.00559603	MACF1
1	39911001	C	1	T	17	AF=0.5	0/0/1/1	0|1	4	0.000144958	0.000144958	MACF1
1	39914090	G	0	A	12	AF=0.5	0/0/1/1	0|1	4	0.000488281	0.000488281	MACF1
1	40032239	T	7	C	20	AF=0.5	0/0/1/1	1|0	4	0.0191573	0.0191573	PABPC4
1	40033905	G	0	A	48	AF=0.75	0/1/1/1	0|1	4	7.10543e-15	1.95676e-06	PABPC4
1	40035686	C	19	T	6	AF=0.5	0/0/1/1	0|1	4	0.0146333	0.0146333	PABPC4
1	40036847	G	123	C	93	AF=0.5	0/0/1/1	0|1	4	0.0482212	0.0482212	PABPC4
1	40037354	C	29	G	12	AF=0.5	0/0/1/1	0|1	4	0.0115078	0.0115078	PABPC4
1	40041714	G	28	A	253	AF=0.5	0/0/1/1	1|0	4	1.7276e-46	1.7276e-46	PABPC4
1	40105011	C	0	T	21	AF=0.5	0/0/1/1	1|0	4	9.53674e-07	9.53674e-07	HEYL
1	40212957	T	1	C	28	AF=0.5	0/0/1/1	0|1	4	1.11759e-07	1.11759e-07	PPIE
1	40219280	T	47	C	111	AF=0.5	0/0/1/1	0|1	4	3.77905e-07	3.77905e-07	PPIE
1	40255500	G	13	A	3	AF=0.5	0/0/1/1	0|1	4	0.0212708	0.0212708	None
1	40255530	C	22	A	4	AF=0.5	0/0/1/1	0|1	4	0.000533521	0.000533521	None
1	40319587	A	8	C	49	AF=0.5	0/0/1/1	0|1	4	2.71685e-08	2.71685e-08	AK304759, TRIT1
1	40332118	T	0	C	12	AF=0.5	0/0/1/1	0|1	4	0.000488281	0.000488281	TRIT1
1	40347373	C	7	T	25	AF=0.5	0/0/1/1	0|1	4	0.0021024	0.0021024	TRIT1
1	40348588	G	29	C	13	AF=0.5	0/0/1/1	0|1	4	0.0195205	0.0195205	TRIT1
1	40361783	G	10	C	33	AF=0.5	0/0/1/1	0|1	4	0.000606107	0.000606107	MYCL1
1	40560458	A	0	G	17	AF=0.5	0/0/1/1	0/1	4	1.52588e-05	1.52588e-05	PPT1
1	40741899	C	4	T	13	AF=0.5	0/0/1/1	0|1	4	0.0490417	0.0490417	ZMPSTE24
1	40840353	A	24	G	6	AF=0.5	0/0/1/1	1|0	4	0.00143091	0.00143091	SMAP2
1	40916218	T	0	C	23	AF=0.5	0/0/1/1	1|0	4	2.38419e-07	2.38419e-07	ZFP69B
1	40923019	G	6	A	54	AF=0.5	0/0/1/1	1|0	4	9.72296e-11	9.72296e-11	ZFP69B
1	40939737	A	0	C	10	AF=0.5	0/0/1/1	1|0	4	0.00195312	0.00195312	None
1	40948479	T	0	C	11	AF=0.5	0/0/1/1	1|0	4	0.000976562	0.000976562	ZFP69
1	40964542	C	0	T	10	AF=0.5	0/0/1/1	1|0	4	0.00195312	0.00195312	None
1	40974799	T	0	C	13	AF=0.5	0/0/1/1	1|0	4	0.000244141	0.000244141	EXO5
1	40975260	G	0	C	24	AF=0.5	0/0/1/1	1|0	4	1.19209e-07	1.19209e-07	EXO5
1	40977303	G	0	A	14	AF=0.5	0/0/1/1	1|0	4	0.00012207	0.00012207	EXO5
1	40980731	G	0	T	40	AF=0.5	0/0/1/1	1|0	4	1.81899e-12	1.81899e-12	EXO5
1	41013173	G	19	A	5	AF=0.5	0/0/1/1	0|1	4	0.00661075	0.00661075	ZNF684
1	41155173	T	24	C	43	AF=0.75	0/1/1/1	0|1	4	0.02712	0.0477819	LOC100130557
1	41155486	C	5	T	15	AF=0.5	0/0/1/1	1|0	4	0.0413895	0.0413895	LOC100130557
1	41156009	C	13	T	27	AF=0.5	0/0/1/1	1|0	4	0.0384773	0.0384773	LOC100130557
1	41156491	C	74	G	12	AF=0.5	0/0/1/1	0|1	4	4.68976e-12	4.68976e-12	LOC100130557
1	41188347	G	0	A	11	AF=0.5	0/0/1/1	0|1	4	0.000976562	0.000976562	NFYC
1	41189629	A	13	G	4	AF=0.5	0/0/1/1	0|1	4	0.0490417	0.0490417	NFYC
1	41231424	T	0	C	10	AF=0.5	0/0/1/1	0|1	4	0.00195312	0.00195312	NFYC
1	41235177	G	7	C	19	AF=0.5	0/0/1/1	0|1	4	0.0289593	0.0289593	NFYC
1	41235946	G	39	A	11	AF=0.5	0/0/1/1	0|1	4	9.02149e-05	9.02149e-05	NFYC
1	41300690	G	0	A	36	AF=0.5	0/0/1/1	1|0	4	2.91038e-11	2.91038e-11	KCNQ4
1	41445993	G	0	C	13	AF=0.5	0/0/1/1	0|1	4	0.000244141	0.000244141	CTPS1
1	41446231	T	0	G	19	AF=0.5	0/0/1/1	0|1	4	3.8147e-06	3.8147e-06	CTPS1
1	41453053	A	340	T	226	AF=0.5	0/0/1/1	0|1	4	1.88813e-06	1.88813e-06	CTPS1
1	41466550	T	33	A	7	AF=0.5	0/0/1/1	0|1	4	4.2277e-05	4.2277e-05	CTPS1
1	41474400	C	72	G	43	AF=0.5	0/0/1/1	0|1	4	0.00873511	0.00873511	CTPS1
1	41485077	T	0	C	12	AF=0.5	0/0/1/1	0|1	4	0.000488281	0.000488281	SLFNL1, SLFNL1-AS1
1	41488904	G	4	A	13	AF=0.5	0/0/1/1	0|1	4	0.0490417	0.0490417	SLFNL1-AS1
1	41491801	A	0	G	18	AF=0.5	0/0/1/1	0|1	4	7.62939e-06	7.62939e-06	SLFNL1-AS1
1	41493111	A	96	G	32	AF=0.5	0/0/1/1	0|1	4	1.28418e-08	1.28418e-08	SCMH1, SLFNL1-AS1
1	41493811	C	30	T	61	AF=0.5	0/0/1/1	0|1	4	0.00151651	0.00151651	SCMH1, SLFNL1-AS1
1	41494222	G	0	T	12	AF=0.5	0/0/1/1	0|1	4	0.000488281	0.000488281	SCMH1, SLFNL1-AS1
1	41508575	G	26	A	6	AF=0.5	0/0/1/1	1|0	4	0.000535053	0.000535053	SCMH1, SLFNL1-AS1
1	41524538	T	1	C	15	AF=0.5	0/0/1/1	1|0	4	0.000518799	0.000518799	SCMH1
1	41528872	G	0	A	10	AF=0.5	0/0/1/1	1|0	4	0.00195312	0.00195312	SCMH1
1	41551819	T	0	A	13	AF=0.5	0/0/1/1	1|0	4	0.000244141	0.000244141	SCMH1
1	41564024	C	0	T	19	AF=0.5	0/0/1/1	0|1	4	3.8147e-06	3.8147e-06	SCMH1
1	41569203	T	0	C	11	AF=0.5	0/0/1/1	0|1	4	0.000976562	0.000976562	SCMH1
1	41636681	T	0	C	19	AF=0.5	0/0/1/1	1|0	4	3.8147e-06	3.8147e-06	SCMH1
1	41648131	G	16	A	4	AF=0.5	0/0/1/1	0|1	4	0.0118179	0.0118179	SCMH1
1	41682530	G	0	C	16	AF=0.25	0/0/0/1	0|1	4	3.05176e-05	2.32831e-10	SCMH1
1	42925688	T	85	G	124	AF=0.5	0/0/1/1	0|1	4	0.00841919	0.00841919	PPCS
1	43130019	G	0	A	10	AF=0.5	0/0/1/1	1|0	4	0.00195312	0.00195312	PPIH
1	43137280	A	23	G	8	AF=0.5	0/0/1/1	0|1	4	0.0106738	0.0106738	PPIH
1	43159705	T	26	G	50	AF=0.5	0/0/1/1	1|0	4	0.00790518	0.00790518	YBX1
1	43165292	T	33	G	46	AF=0.75	0/1/1/1	0/1	4	0.176611	0.00104975	YBX1
1	43165341	A	46	C	73	AF=0.5	0/0/1/1	0|1	4	0.0167863	0.0167863	YBX1
1	43245560	A	6	G	19	AF=0.5	0/0/1/1	1|0	4	0.0146333	0.0146333	None
1	43271033	T	15	C	5	AF=0.5	0/0/1/1	1|0	4	0.0413895	0.0413895	None
1	43278242	C	11	T	28	AF=0.5	0/0/1/1	1|0	4	0.0094753	0.0094753	CCDC23
1	43281980	A	22	C	9	AF=0.5	0/0/1/1	1|0	4	0.0294494	0.0294494	CCDC23
1	43284458	A	0	G	10	AF=0.5	0/0/1/1	0|1	4	0.00195312	0.00195312	ERMAP
1	43296195	C	38	T	16	AF=0.5	0/0/1/1	1|0	4	0.00383827	0.00383827	ERMAP
1	43300253	T	17	C	4	AF=0.5	0/0/1/1	0|1	4	0.00719738	0.00719738	ERMAP
1	43304368	C	0	A	21	AF=0.5	0/0/1/1	1|0	4	9.53674e-07	9.53674e-07	ERMAP
1	43311165	A	0	G	13	AF=0.5	0/0/1/1	1|0	4	0.000244141	0.000244141	None
1	43317793	G	59	A	34	AF=0.5	0/0/1/1	1|0	4	0.0124006	0.0124006	ZNF691
1	43392250	C	227	G	496	AF=0.5	0/0/1/1	1|0	4	6.37043e-24	6.37043e-24	SLC2A1
1	43395635	C	92	T	196	AF=0.5	0/0/1/1	1|0	4	8.4956e-10	8.4956e-10	SLC2A1
1	43396414	G	68	A	132	AF=0.5	0/0/1/1	1|0	4	7.08653e-06	7.08653e-06	SLC2A1
1	43399167	G	0	T	16	AF=0.5	0/0/1/1	1|0	4	3.05176e-05	3.05176e-05	SLC2A1
1	43400485	C	0	T	11	AF=0.5	0/0/1/1	1|0	4	0.000976562	0.000976562	SLC2A1
1	43401438	A	0	C	12	AF=0.5	0/0/1/1	1|0	4	0.000488281	0.000488281	SLC2A1
1	43401499	C	0	T	10	AF=0.5	0/0/1/1	1|0	4	0.00195312	0.00195312	SLC2A1
1	43402545	G	2	A	10	AF=0.5	0/0/1/1	1|0	4	0.0385742	0.0385742	SLC2A1
1	43408966	G	84	A	120	AF=0.5	0/0/1/1	1|0	4	0.0140669	0.0140669	SLC2A1
1	43420154	T	0	C	13	AF=0.5	0/0/1/1	1|0	4	0.000244141	0.000244141	SLC2A1
1	43447091	C	25	T	5	AF=0.5	0/0/1/1	0|1	4	0.000324914	0.000324914	SLC2A1-AS1
1	43448582	G	0	A	20	AF=0.5	0/0/1/1	0|1	4	1.90735e-06	1.90735e-06	SLC2A1-AS1
1	43475584	C	0	T	13	AF=0.5	0/0/1/1	1|0	4	0.000244141	0.000244141	None
1	43592670	C	0	A	10	AF=0.25	0/0/0/1	0/1	4	0.00195312	9.53674e-07	AK309744
1	43633919	A	9	C	10	AF=0.75	0/1/1/1	1|0	4	1	0.0329761	EBNA1BP2
1	43636484	C	688	G	908	AF=0.5	0/0/1/1	1|0	4	4.01413e-08	4.01413e-08	EBNA1BP2
1	43636692	T	12	C	35	AF=0.5	0/0/1/1	1|0	4	0.00108854	0.00108854	EBNA1BP2
1	43637549	A	21	G	4	AF=0.5	0/0/1/1	1|0	4	0.000910521	0.000910521	EBNA1BP2
1	43828663	G	340	A	484	AF=0.5	0/0/1/1	1|0	4	5.92111e-07	5.92111e-07	CDC20
1	43842827	T	19	A	7	AF=0.5	0/0/1/1	0|1	4	0.0289593	0.0289593	None
1	43850473	A	94	G	126	AF=0.5	0/0/1/1	0|1	4	0.0363758	0.0363758	MED8
1	43851797	G	159	A	240	AF=0.5	0/0/1/1	1|0	4	5.875e-05	5.875e-05	MED8
1	43854389	C	11	T	24	AF=0.5	0/0/1/1	1|0	4	0.0409596	0.0409596	MED8
1	43871273	T	0	G	10	AF=0.5	0/0/1/1	0|1	4	0.00195312	0.00195312	SZT2
1	43875819	T	0	C	10	AF=0.5	0/0/1/1	0|1	4	0.00195312	0.00195312	SZT2
1	43884657	G	0	C	15	AF=0.5	0/0/1/1	0|1	4	6.10352e-05	6.10352e-05	SZT2
1	43892189	G	22	A	5	AF=0.5	0/0/1/1	0|1	4	0.00151372	0.00151372	SZT2
1	43898053	T	1	G	13	AF=0.5	0/0/1/1	0|1	4	0.00183105	0.00183105	SZT2
1	43899627	C	28	T	6	AF=0.5	0/0/1/1	0|1	4	0.000195126	0.000195126	SZT2
1	43906896	A	44	G	19	AF=0.5	0/0/1/1	0|1	4	0.00222753	0.00222753	SZT2
1	43917409	T	45	C	24	AF=0.5	0/0/1/1	0|1	4	0.0154323	0.0154323	HYI, SZT2
1	43917637	G	0	A	68	AF=0.5	0/0/1/1	0|1	4	6.77626e-21	6.77626e-21	HYI, SZT2
1	44123502	G	0	A	18	AF=0.5	0/0/1/1	1|0	4	7.62939e-06	7.62939e-06	KDM4A
1	44129779	A	7	G	50	AF=0.5	0/0/1/1	1|0	4	4.23671e-09	4.23671e-09	KDM4A
1	44146466	T	0	C	10	AF=0.5	0/0/1/1	1|0	4	0.00195312	0.00195312	KDM4A
1	44174793	T	2	G	15	AF=0.5	0/0/1/1	1|0	4	0.00234985	0.00234985	ST3GAL3
1	44243283	C	0	T	13	AF=0.5	0/0/1/1	1|0	4	0.000244141	0.000244141	ST3GAL3
1	44245670	A	0	G	10	AF=0.5	0/0/1/1	1|0	4	0.00195312	0.00195312	ST3GAL3
1	44274434	G	0	C	19	AF=0.5	0/0/1/1	1|0	4	3.8147e-06	3.8147e-06	ST3GAL3
1	44289998	A	0	T	10	AF=0.5	0/0/1/1	1|0	4	0.00195312	0.00195312	ST3GAL3
1	44327029	G	2	A	8	AF=0.25	0/0/0/1	0/1	4	0.109375	0.000415802	ST3GAL3
1	44340655	G	0	T	10	AF=0.5	0/0/1/1	1|0	4	0.00195312	0.00195312	ST3GAL3
1	44369600	G	10	A	27	AF=0.5	0/0/1/1	0|1	4	0.00763208	0.00763208	ST3GAL3
1	44373439	C	1	T	13	AF=0.5	0/0/1/1	0|1	4	0.00183105	0.00183105	ST3GAL3
1	44379577	A	6	G	26	AF=0.5	0/0/1/1	0|1	4	0.000535053	0.000535053	ST3GAL3
1	44396215	T	12	C	34	AF=0.5	0/0/1/1	0|1	4	0.00164149	0.00164149	ST3GAL3
1	44408969	C	3	A	27	AF=0.5	0/0/1/1	1|0	4	8.43033e-06	8.43033e-06	None
1	44409048	A	20	G	6	AF=0.5	0/0/1/1	0|1	4	0.00935531	0.00935531	None
1	44411589	A	0	G	39	AF=0.5	0/0/1/1	1|0	4	3.63798e-12	3.63798e-12	None
1	44414156	T	35	A	13	AF=0.5	0/0/1/1	1|0	4	0.00208811	0.00208811	IPO13
1	44438396	A	177	C	99	AF=0.5	0/0/1/1	0|1	4	3.09583e-06	3.09583e-06	DPH2
1	44442930	A	64	G	39	AF=0.5	0/0/1/1	0|1	4	0.0176091	0.0176091	ATP6V0B
1	44443459	G	17	A	112	AF=0.5	0/0/1/1	0|1	4	2.44514e-18	2.44514e-18	ATP6V0B
1	44446651	T	20	C	8	AF=0.5	0/0/1/1	0|1	4	0.0356981	0.0356981	B4GALT2
1	44455217	G	3	A	13	AF=0.5	0/0/1/1	1|0	4	0.0212708	0.0212708	B4GALT2
1	44480093	G	2	A	21	AF=0.5	0/0/1/1	1|0	4	6.60419e-05	6.60419e-05	SLC6A9
1	44680719	G	38	C	12	AF=0.5	0/0/1/1	0|1	4	0.000305864	0.000305864	DMAP1
1	44681483	C	27	G	45	AF=0.5	0/0/1/1	0|1	4	0.0443709	0.0443709	DMAP1
1	44682084	A	25	T	9	AF=0.5	0/0/1/1	0|1	4	0.00904119	0.00904119	DMAP1
1	44746217	G	0	A	20	AF=0.5	0/0/1/1	0|1	4	1.90735e-06	1.90735e-06	ERI3
1	45187285	G	12	A	31	AF=0.5	0/0/1/1	1|0	4	0.00540157	0.00540157	C1orf228
1	45196673	C	44	T	73	AF=0.5	0/0/1/1	0|1	4	0.00934076	0.00934076	None
1	45196677	C	73	T	48	AF=0.5	0/0/1/1	1|0	4	0.0287032	0.0287032	None
1	45205598	T	789	C	707	AF=0.5	0/0/1/1	1|0	4	0.0362065	0.0362065	KIF2C
1	45218895	A	719	T	585	AF=0.5	0/0/1/1	1|0	4	0.00022775	0.00022775	KIF2C
1	45224998	A	732	C	502	AF=0.5	0/0/1/1	1|0	4	6.25753e-11	6.25753e-11	KIF2C
1	45226084	G	778	A	647	AF=0.5	0/0/1/1	1|0	4	0.000568997	0.000568997	KIF2C
1	45270024	G	15	C	43	AF=0.5	0/0/1/1	1|0	4	0.000306947	0.000306947	PLK3
1	45310782	C	0	G	10	AF=0.5	0/0/1/1	1|0	4	0.00195312	0.00195312	None
1	45318718	C	0	G	18	AF=0.5	0/0/1/1	1|0	4	7.62939e-06	7.62939e-06	EIF2B3
1	45356638	C	12	T	3	AF=0.5	0/0/1/1	0|1	4	0.0351562	0.0351562	EIF2B3
1	45386706	T	0	C	20	AF=0.5	0/0/1/1	0|1	4	1.90735e-06	1.90735e-06	EIF2B3
1	45403729	G	0	T	12	AF=0.5	0/0/1/1	1|0	4	0.000488281	0.000488281	EIF2B3
1	45419015	T	0	C	11	AF=0.5	0/0/1/1	1|0	4	0.000976562	0.000976562	EIF2B3
1	45455528	A	0	G	18	AF=0.5	0/0/1/1	0|1	4	7.62939e-06	7.62939e-06	None
1	45456141	C	6	A	17	AF=0.5	0/0/1/1	1|0	4	0.0346897	0.0346897	None
1	45456143	G	1	A	17	AF=0.5	0/0/1/1	1|0	4	0.000144958	0.000144958	None
1	45466573	C	18	G	4	AF=0.5	0/0/1/1	1|0	4	0.00434351	0.00434351	None
1	45469176	A	168	T	127	AF=0.5	0/0/1/1	1|0	4	0.0197103	0.0197103	HECTD3
1	45471362	G	1	A	12	AF=0.5	0/0/1/1	1|0	4	0.00341797	0.00341797	HECTD3
1	45474008	T	4	C	28	AF=0.5	0/0/1/1	1|0	4	1.93012e-05	1.93012e-05	HECTD3
1	45479772	G	184	T	142	AF=0.5	0/0/1/1	1|0	4	0.0230138	0.0230138	UROD
1	45800156	C	123	T	173	AF=0.5	0/0/1/1	1|0	4	0.00431963	0.00431963	MUTYH
1	45964238	T	0	C	10	AF=0.5	0/0/1/1	0|1	4	0.00195312	0.00195312	CCDC163P
1	45973928	G	21	A	42	AF=0.5	0/0/1/1	0|1	4	0.0111414	0.0111414	MMACHC
1	45975300	G	8	A	20	AF=0.5	0/0/1/1	1|0	4	0.0356981	0.0356981	MMACHC
1	45976147	G	71	A	132	AF=0.5	0/0/1/1	0|1	4	2.22469e-05	2.22469e-05	MMACHC
1	45978619	G	15	T	29	AF=0.5	0/0/1/1	1|0	4	0.0487668	0.0487668	PRDX1
1	45982844	A	27	G	11	AF=0.5	0/0/1/1	0|1	4	0.013853	0.013853	PRDX1
1	45986484	A	3	G	12	AF=0.25	0/0/0/1	0|1	4	0.0351562	1.23642e-05	PRDX1
1	46020795	T	0	C	14	AF=0.5	0/0/1/1	0|1	4	0.00012207	0.00012207	AKR1A1
1	46032974	T	48	C	134	AF=0.5	0/0/1/1	0|1	4	1.34338e-10	1.34338e-10	AKR1A1
1	46073489	G	452	A	393	AF=0.5	0/0/1/1	0|1	4	0.0459505	0.0459505	NASP
1	46075799	A	85	G	48	AF=0.5	0/0/1/1	1|0	4	0.00169432	0.00169432	NASP
1	46083706	C	5	G	66	AF=0.5	0/0/1/1	1|0	4	1.19019e-14	1.19019e-14	NASP
1	46084383	G	61	T	113	AF=0.5	0/0/1/1	1|0	4	9.90268e-05	9.90268e-05	NASP
1	46095989	T	6	C	33	AF=0.5	0/0/1/1	1|0	4	1.42993e-05	1.42993e-05	GPBP1L1
1	46122140	A	2	G	11	AF=0.5	0/0/1/1	1|0	4	0.0224609	0.0224609	GPBP1L1
1	46124663	A	1	G	28	AF=0.5	0/0/1/1	1|0	4	1.11759e-07	1.11759e-07	GPBP1L1
1	46131873	T	0	C	15	AF=0.5	0/0/1/1	1|0	4	6.10352e-05	6.10352e-05	GPBP1L1
1	46156088	T	4	C	36	AF=0.5	0/0/1/1	1|0	4	1.85702e-07	1.85702e-07	TMEM69
1	46163733	A	56	G	21	AF=0.5	0/0/1/1	1|0	4	8.21592e-05	8.21592e-05	IPP
1	46163974	T	31	A	53	AF=0.5	0/0/1/1	1|0	4	0.0213832	0.0213832	IPP
1	46423300	T	0	A	13	AF=0.5	0/0/1/1	0|1	4	0.000244141	0.000244141	MAST2
1	46466721	T	3	C	20	AF=0.5	0/0/1/1	0|1	4	0.000488281	0.000488281	MAST2
1	46495024	G	1	A	21	AF=0.5	0/0/1/1	1|0	4	1.09673e-05	1.09673e-05	MAST2
1	46500613	T	69	C	36	AF=0.5	0/0/1/1	1|0	4	0.00165903	0.00165903	MAST2
1	46501359	A	61	G	17	AF=0.5	0/0/1/1	1|0	4	5.66374e-07	5.66374e-07	MAST2
1	46502836	A	0	C	14	AF=0.5	0/0/1/1	0|1	4	0.00012207	0.00012207	None
1	46553785	G	0	A	11	AF=0.5	0/0/1/1	1|0	4	0.000976562	0.000976562	PIK3R3
1	46560643	A	0	G	10	AF=0.5	0/0/1/1	0|1	4	0.00195312	0.00195312	PIK3R3
1	46657651	T	0	C	16	AF=0.5	0/0/1/1	1|0	4	3.05176e-05	3.05176e-05	POMGNT1
1	46658328	A	0	G	15	AF=0.5	0/0/1/1	1|0	4	6.10352e-05	6.10352e-05	POMGNT1
1	46658343	G	0	A	15	AF=0.5	0/0/1/1	1|0	4	6.10352e-05	6.10352e-05	POMGNT1
1	46660295	T	172	C	221	AF=0.5	0/0/1/1	1|0	4	0.0153595	0.0153595	POMGNT1
1	46720123	T	0	G	12	AF=0.5	0/0/1/1	1|0	4	0.000488281	0.000488281	RAD54L
1	46761496	T	0	C	10	AF=0.5	0/0/1/1	0|1	4	0.00195312	0.00195312	LRRC41
1	46779786	G	18	A	6	AF=0.5	0/0/1/1	0|1	4	0.0226558	0.0226558	UQCRH
1	46781602	G	33	T	8	AF=0.5	0/0/1/1	0|1	4	0.000112221	0.000112221	UQCRH
1	46810530	A	169	G	246	AF=0.5	0/0/1/1	0|1	4	0.000183662	0.000183662	NSUN4
1	46815375	A	15	T	34	AF=0.5	0/0/1/1	0|1	4	0.00939924	0.00939924	NSUN4
1	46976837	C	0	T	19	AF=0.5	0/0/1/1	0|1	4	3.8147e-06	3.8147e-06	DMBX1
1	46981145	G	22	C	4	AF=0.5	0/0/1/1	0|1	4	0.000533521	0.000533521	None
1	47023531	C	117	A	60	AF=0.5	0/0/1/1	1|0	4	2.19953e-05	2.19953e-05	MKNK1, MKNK1-AS1
1	47040084	G	3	C	12	AF=0.5	0/0/1/1	1|0	4	0.0351562	0.0351562	MKNK1
1	47058863	C	3	T	20	AF=0.5	0/0/1/1	1|0	4	0.000488281	0.000488281	MKNK1
1	47060078	G	0	A	13	AF=0.5	0/0/1/1	1|0	4	0.000244141	0.000244141	MKNK1
1	47099235	A	22	C	140	AF=0.5	0/0/1/1	0|1	4	3.28858e-22	3.28858e-22	ATPAF1
1	47099721	T	11	C	49	AF=0.5	0/0/1/1	0|1	4	7.56128e-07	7.56128e-07	ATPAF1
1	47100099	C	0	A	13	AF=0.5	0/0/1/1	0|1	4	0.000244141	0.000244141	ATPAF1
1	47126783	C	0	T	35	AF=0.25	0/0/0/1	1|0	4	5.82077e-11	8.47033e-22	ATPAF1, EFCAB14
1	47135582	T	0	C	10	AF=0.5	0/0/1/1	1|0	4	0.00195312	0.00195312	EFCAB14
1	47142538	G	49	A	26	AF=0.5	0/0/1/1	1|0	4	0.0105821	0.0105821	EFCAB14, EFCAB14-AS1
1	47143547	A	118	G	44	AF=0.5	0/0/1/1	1|0	4	5.30726e-09	5.30726e-09	EFCAB14, EFCAB14-AS1
1	47159084	T	0	C	11	AF=0.5	0/0/1/1	1|0	4	0.000976562	0.000976562	EFCAB14
1	47182483	T	0	C	15	AF=0.5	0/0/1/1	0|1	4	6.10352e-05	6.10352e-05	EFCAB14
1	47184196	A	19	G	36	AF=0.5	0/0/1/1	1|0	4	0.0300289	0.0300289	EFCAB14
1	47184569	G	42	C	20	AF=0.5	0/0/1/1	1|0	4	0.00714873	0.00714873	EFCAB14
1	47682680	T	218	C	168	AF=0.5	0/0/1/1	1|0	4	0.0125298	0.0125298	TAL1
1	47734148	T	0	C	14	AF=0.5	0/0/1/1	1|0	4	0.00012207	0.00012207	STIL
1	47734385	G	2	A	10	AF=0.5	0/0/1/1	0|1	4	0.0385742	0.0385742	STIL
1	47735280	T	0	C	36	AF=0.5	0/0/1/1	1|0	4	2.91038e-11	2.91038e-11	STIL
1	47763207	C	1	T	17	AF=0.5	0/0/1/1	0|1	4	0.000144958	0.000144958	STIL
1	47763274	G	9	C	36	AF=0.5	0/0/1/1	0|1	4	6.57466e-05	6.57466e-05	STIL
1	47763713	C	0	T	11	AF=0.5	0/0/1/1	0|1	4	0.000976562	0.000976562	STIL
1	47767141	C	32	A	6	AF=0.5	0/0/1/1	0|1	4	2.43426e-05	2.43426e-05	STIL
1	47767914	G	155	A	112	AF=0.5	0/0/1/1	0|1	4	0.0100271	0.0100271	STIL
1	47778833	T	1	C	14	AF=0.5	0/0/1/1	1|0	4	0.000976562	0.000976562	STIL
1	47796110	A	3	C	19	AF=0.5	0/0/1/1	0|1	4	0.000855446	0.000855446	None
1	47796383	C	19	G	6	AF=0.5	0/0/1/1	1|0	4	0.0146333	0.0146333	None
1	47799639	G	51	C	165	AF=0.5	0/0/1/1	0|1	4	3.24935e-15	3.24935e-15	CMPK1
1	47821149	G	0	A	15	AF=0.5	0/0/1/1	1|0	4	6.10352e-05	6.10352e-05	CMPK1
1	47822913	A	0	G	10	AF=0.5	0/0/1/1	0|1	4	0.00195312	0.00195312	CMPK1
1	47825586	C	0	G	15	AF=0.5	0/0/1/1	1|0	4	6.10352e-05	6.10352e-05	CMPK1
1	47829507	C	16	T	5	AF=0.75	0/1/1/1	0|1	4	0.0266037	1.24316e-06	CMPK1
1	47834960	G	0	A	10	AF=0.5	0/0/1/1	1|0	4	0.00195312	0.00195312	CMPK1
1	47841472	G	12	C	35	AF=0.5	0/0/1/1	0|1	4	0.00108854	0.00108854	CMPK1
1	47842777	C	651	T	364	AF=0.5	0/0/1/1	1|0	4	1.6038e-19	1.6038e-19	CMPK1
1	47844464	G	49	A	117	AF=0.5	0/0/1/1	1|0	4	1.34532e-07	1.34532e-07	CMPK1
1	47849756	T	0	C	20	AF=0.5	0/0/1/1	1|0	4	1.90735e-06	1.90735e-06	None
1	50954996	T	0	C	10	AF=0.5	0/0/1/1	0|1	4	0.00195312	0.00195312	FAF1
1	51114503	T	0	C	10	AF=0.5	0/0/1/1	0|1	4	0.00195312	0.00195312	FAF1
1	51188594	T	0	C	11	AF=0.5	0/0/1/1	0|1	4	0.000976562	0.000976562	FAF1
1	51188674	G	0	C	12	AF=0.75	0/1/1/1	0|1	4	0.000488281	0.0459291	FAF1
1	51195072	G	0	A	24	AF=0.5	0/0/1/1	0|1	4	1.19209e-07	1.19209e-07	FAF1
1	51211233	G	0	A	16	AF=0.5	0/0/1/1	0|1	4	3.05176e-05	3.05176e-05	FAF1
1	51218695	G	1	A	10	AF=0.5	0/0/1/1	0|1	4	0.0117188	0.0117188	FAF1
1	51317374	T	0	G	13	AF=0.5	0/0/1/1	0|1	4	0.000244141	0.000244141	FAF1
1	51368512	C	0	T	10	AF=0.5	0/0/1/1	0|1	4	0.00195312	0.00195312	FAF1
1	51413205	A	2	G	12	AF=0.5	0/0/1/1	1|0	4	0.0129395	0.0129395	FAF1
1	51443441	C	2	T	30	AF=0.75	0/1/1/1	0|1	4	2.46335e-07	0.0126714	None
1	51476705	G	4	A	36	AF=0.5	0/0/1/1	0|1	4	1.85702e-07	1.85702e-07	None
1	51477088	G	1	A	39	AF=0.5	0/0/1/1	0|1	4	7.45786e-11	7.45786e-11	None
1	51712092	A	0	T	11	AF=0.5	0/0/1/1	0|1	4	0.000976562	0.000976562	RNF11
1	52249298	G	0	A	19	AF=0.25	0/0/0/1	1|0	4	3.8147e-06	3.63798e-12	OSBPL9
1	53151249	G	0	T	116	AF=0.75	0/1/1/1	0/1	4	2.40741e-35	7.00909e-15	None
1	53679229	A	51	G	25	AF=0.5	0/0/1/1	1|0	4	0.00383624	0.00383624	CPT2
1	53695783	A	0	C	44	AF=0.5	0/0/1/1	1|0	4	1.13687e-13	1.13687e-13	MAGOH
1	53697139	A	0	G	13	AF=0.5	0/0/1/1	1|0	4	0.000244141	0.000244141	MAGOH
1	53713336	A	49	G	20	AF=0.5	0/0/1/1	1|0	4	0.000636173	0.000636173	LRP8
1	53741816	A	11	G	7	AF=0.75	0/1/1/1	1|0	4	0.480682	0.00124398	LRP8
1	54233511	T	256	C	332	AF=0.5	0/0/1/1	1|0	4	0.00195671	0.00195671	NDC1
1	54233542	A	226	G	330	AF=0.5	0/0/1/1	1|0	4	1.18592e-05	1.18592e-05	NDC1
1	54257376	G	0	C	23	AF=0.5	0/0/1/1	1|0	4	2.38419e-07	2.38419e-07	NDC1
1	54285811	G	4	A	22	AF=0.5	0/0/1/1	1|0	4	0.000533521	0.000533521	NDC1
1	54301944	G	1	A	19	AF=0.5	0/0/1/1	1|0	4	4.00543e-05	4.00543e-05	NDC1
1	54325688	T	1	C	31	AF=0.5	0/0/1/1	1|0	4	1.53668e-08	1.53668e-08	YIPF1
1	54352019	T	0	G	14	AF=0.5	0/0/1/1	1|0	4	0.00012207	0.00012207	YIPF1
1	54668278	A	0	G	17	AF=0.5	0/0/1/1	1|0	4	1.52588e-05	1.52588e-05	MRPL37
1	54682489	C	6	G	23	AF=0.5	0/0/1/1	0|1	4	0.0023157	0.0023157	MRPL37
1	54683014	C	2	G	11	AF=0.5	0/0/1/1	0|1	4	0.0224609	0.0224609	MRPL37
1	54683856	C	694	G	432	AF=0.5	0/0/1/1	0|1	4	5.58464e-15	5.58464e-15	MRPL37
1	54683925	G	319	A	246	AF=0.5	0/0/1/1	0|1	4	0.00242347	0.00242347	MRPL37
1	54685195	T	7	A	19	AF=0.5	0/0/1/1	0|1	4	0.0289593	0.0289593	None
1	54685855	G	0	A	16	AF=0.5	0/0/1/1	0|1	4	3.05176e-05	3.05176e-05	None
1	54686374	T	0	C	27	AF=0.5	0/0/1/1	0|1	4	1.49012e-08	1.49012e-08	None
1	54686464	C	0	T	32	AF=0.5	0/0/1/1	0|1	4	4.65661e-10	4.65661e-10	None
1	54689461	T	0	C	12	AF=0.5	0/0/1/1	0|1	4	0.000488281	0.000488281	None
1	54689643	A	0	G	12	AF=0.5	0/0/1/1	0|1	4	0.000488281	0.000488281	None
1	54689765	C	0	G	11	AF=0.5	0/0/1/1	0|1	4	0.000976562	0.000976562	None
1	54689962	G	0	C	24	AF=0.5	0/0/1/1	0|1	4	1.19209e-07	1.19209e-07	None
1	54736038	G	0	A	14	AF=0.5	0/0/1/1	0|1	4	0.00012207	0.00012207	SSBP3
1	54817681	G	1	A	14	AF=0.25	0/0/0/1	1|0	4	0.000976562	4.28408e-08	SSBP3
1	55184209	C	10	T	23	AF=0.5	0/0/1/1	1|0	4	0.035082	0.035082	HEATR8-TTC4, TTC4
1	55185763	G	18	A	5	AF=0.5	0/0/1/1	1|0	4	0.010622	0.010622	HEATR8-TTC4, TTC4
1	55190676	T	0	C	21	AF=0.5	0/0/1/1	1|0	4	9.53674e-07	9.53674e-07	HEATR8-TTC4, TTC4
1	55223110	C	23	T	81	AF=0.5	0/0/1/1	1|0	4	9.3447e-09	9.3447e-09	PARS2
1	55322868	G	0	A	12	AF=0.667	0/1/1	0|1	3	0.000488281	0.0115796	DHCR24
1	55505447	C	59	T	99	AF=0.333	0/0/1	1|0	3	0.00182636	6.00867e-14	PCSK9
1	55509213	G	4	C	14	AF=0.333	0/0/1	1|0	3	0.0308838	0.00014314	PCSK9
1	55514073	C	2	G	29	AF=0.667	0/1/1	0|1	3	4.62867e-07	0.00083674	PCSK9
1	55518528	C	2	A	18	AF=0.667	0/1/1	0|1	3	0.000402451	0.0305843	PCSK9
1	55521109	G	20	A	7	AF=0.667	0/1/1	0|1	3	0.0191573	1.74735e-05	PCSK9
1	55521242	T	14	G	8	AF=0.667	0/1/1	0|1	3	0.286279	0.00507046	PCSK9
1	55523984	C	1	T	25	AF=0.667	0/1/1	0|1	3	8.04663e-07	0.000568314	PCSK9
1	55524197	A	72	G	56	AF=0.667	0/1/1	0|1	3	0.184683	1.4214e-07	PCSK9
1	55524237	G	59	A	72	AF=0.667	0/1/1	0|1	3	0.294406	0.00530971	PCSK9
1	55524601	G	17	A	11	AF=0.667	0/1/1	0|1	3	0.344928	0.00397389	PCSK9
1	55525726	T	1	G	50	AF=0.667	0/1/1	0|1	3	4.61853e-14	4.00227e-08	PCSK9
1	55527918	C	0	T	26	AF=0.667	0/1/1	0|1	3	2.98023e-08	3.33595e-05	PCSK9
1	55529828	C	146	T	192	AF=0.667	0/1/1	0|1	3	0.0142576	0.000167205	PCSK9
1	55532742	G	40	C	137	AF=0.667	0/1/1	0|1	3	1.2527e-13	0.00234735	USP24
1	55534271	C	25	T	109	AF=0.667	0/1/1	0|1	3	1.05331e-13	0.000220269	USP24
1	55538462	C	208	T	48	AF=0.333	0/0/1	1|0	3	6.41178e-25	2.67034e-07	USP24
1	55538903	A	0	G	12	AF=0.667	0/1/1	0|1	3	0.000488281	0.0115796	USP24
1	55541174	A	89	G	253	AF=0.667	0/1/1	0|1	3	2.38352e-19	0.00407372	USP24
1	55551718	G	31	A	30	AF=0.667	0/1/1	0|1	3	1	0.00603755	USP24
1	55553104	A	0	C	21	AF=0.667	0/1/1	0|1	3	9.53674e-07	0.000274119	USP24
1	55630146	T	0	G	10	AF=0.333	0/0/1	1|0	3	0.00195312	1.67665e-05	USP24
1	55649663	T	0	C	10	AF=0.333	0/0/1	1|0	3	0.00195312	1.67665e-05	USP24
1	55681945	A	0	T	10	AF=0.667	0/1/1	0|1	3	0.00195312	0.0369765	LOC100507634
1	58970997	C	11	T	4	AF=0.667	0/1/1	0|1	3	0.118469	0.0017905	DAB1, OMA1
1	58997538	G	20	A	5	AF=0.667	0/1/1	0|1	3	0.00407732	2.22886e-06	DAB1, OMA1
1	59011924	A	5	G	11	AF=0.333	0/0/1	1|0	3	0.210114	0.00553862	DAB1, OMA1
1	59011985	C	6	T	17	AF=0.333	0/0/1	1|0	3	0.0346897	8.05705e-05	DAB1, OMA1
1	59011987	C	6	A	17	AF=0.333	0/0/1	1|0	3	0.0346897	8.05705e-05	DAB1, OMA1
1	59012431	C	4	T	20	AF=0.333	0/0/1	1|0	3	0.00154388	6.51453e-07	DAB1, OMA1
1	59124546	A	10	G	61	AF=0.667	0/1/1	0|1	3	4.64461e-10	0.000353445	MYSM1
1	59125515	C	81	T	73	AF=0.667	0/1/1	0|1	3	0.572846	8.39973e-07	MYSM1
1	59126289	C	0	G	10	AF=0.667	0/1/1	0|1	3	0.00195312	0.0369765	MYSM1
1	59134586	G	29	C	14	AF=0.667	0/1/1	0|1	3	0.0315395	5.56201e-06	MYSM1
1	59137111	T	1	C	33	AF=0.667	0/1/1	0|1	3	4.07454e-09	2.86296e-05	MYSM1
1	59137120	G	1	A	33	AF=0.667	0/1/1	0|1	3	4.07454e-09	2.86296e-05	MYSM1
1	59137273	C	2	T	40	AF=0.667	0/1/1	0|1	3	4.11092e-10	1.98272e-05	MYSM1
1	59137987	G	0	A	12	AF=0.667	0/1/1	0|1	3	0.000488281	0.0115796	MYSM1
1	59141818	C	1	T	18	AF=0.667	0/1/1	0|1	3	7.62939e-05	0.00663068	MYSM1
1	59147926	T	105	C	121	AF=0.667	0/1/1	0|1	3	0.318385	5.1505e-05	MYSM1
1	59153067	T	8	C	5	AF=0.667	0/1/1	0|1	3	0.581055	0.0396204	MYSM1
1	59155683	T	28	C	25	AF=0.667	0/1/1	0|1	3	0.783846	0.00340637	MYSM1
1	59158632	T	0	C	12	AF=0.667	0/1/1	0|1	3	0.000488281	0.0115796	MYSM1
1	59161579	T	0	C	11	AF=0.333	0/0/1	1|0	3	0.000976562	5.58324e-06	MYSM1
1	59762955	C	0	T	18	AF=0.667	0/1/1	0|1	3	7.62939e-06	0.000825895	FGGY
1	59787350	T	0	G	34	AF=0.667	0/1/1	0|1	3	1.16415e-10	1.36636e-06	FGGY
1	59797559	C	0	T	17	AF=0.667	0/1/1	0|1	3	1.52588e-05	0.00136129	FGGY
1	59844471	G	18	A	8	AF=0.667	0/1/1	0|1	3	0.0755187	0.000221127	FGGY
1	61056742	T	0	C	11	AF=0.667	0/1/1	0|1	3	0.000976562	0.0203885	None
1	61069507	A	0	G	11	AF=0.667	0/1/1	0|1	3	0.000976562	0.0203885	None
1	61074385	A	0	T	11	AF=0.667	0/1/1	0|1	3	0.000976562	0.0203885	None
1	61074899	C	0	T	19	AF=0.667	0/1/1	0|1	3	3.8147e-06	0.000831737	None
1	61103708	G	0	T	10	AF=0.667	0/1/1	0|1	3	0.00195312	0.0369765	None
1	61587866	A	0	C	14	AF=0.667	0/1/1	0|1	3	0.00012207	0.00745572	NFIA
1	61639107	A	0	T	19	AF=0.667	0/1/1	0|1	3	3.8147e-06	0.000831737	NFIA
1	61806183	A	0	G	21	AF=0.667	0/1/1	0|1	3	9.53674e-07	0.000274119	NFIA
1	61819078	G	0	T	12	AF=0.667	0/1/1	0|1	3	0.000488281	0.0115796	NFIA
1	61869783	G	1	A	33	AF=0.667	0/1/1	0|1	3	4.07454e-09	2.86296e-05	NFIA
1	61895589	C	7	A	3	AF=0.667	0/1/1	0|1	3	0.34375	0.0195481	NFIA
1	61899519	A	0	G	12	AF=0.667	0/1/1	0|1	3	0.000488281	0.0115796	NFIA
1	62122460	G	0	C	10	AF=0.667	0/1/1	0|1	3	0.00195312	0.0369765	None
1	62164734	G	3	C	30	AF=0.667	0/1/1	0|1	3	1.40117e-06	0.00248268	TM2D1
1	62165212	A	84	C	15	AF=0.333	0/0/1	1|0	3	8.22285e-13	6.46705e-05	TM2D1
1	62182850	C	0	G	11	AF=0.333	0/0/1	1|0	3	0.000976562	5.58324e-06	TM2D1
1	62904936	G	0	A	10	AF=0.667	0/1/1	0|1	3	0.00195312	0.0369765	USP1
1	62911751	A	0	G	12	AF=0.667	0/1/1	0|1	3	0.000488281	0.0115796	USP1
1	62914978	G	17	A	9	AF=0.667	0/1/1	0|1	3	0.168638	0.00118986	USP1
1	62915473	C	0	T	11	AF=0.667	0/1/1	0|1	3	0.000976562	0.0203885	USP1
1	62920008	A	0	G	10	AF=0.667	0/1/1	0|1	3	0.00195312	0.0369765	None
1	62920029	A	0	G	10	AF=0.667	0/1/1	0|1	3	0.00195312	0.0369765	None
1	63085266	C	0	T	10	AF=0.667	0/1/1	0|1	3	0.00195312	0.0369765	DOCK7
1	63255693	C	0	T	13	AF=0.333	0/0/1	1|0	3	0.000244141	6.1912e-07	ATG4C
1	63301652	G	1	A	11	AF=0.333	0/0/1	1|0	3	0.00634766	4.65475e-05	ATG4C
1	63329459	G	10	A	18	AF=0.333	0/0/1	1|0	3	0.184933	0.000952335	ATG4C
1	63880425	A	8	C	15	AF=0.333	0/0/1	1|0	3	0.21004	0.00285358	ALG6
1	63880552	G	20	A	9	AF=0.667	0/1/1	0|1	3	0.0614283	0.000100593	ALG6
1	63890763	A	0	G	10	AF=0.667	0/1/1	0|1	3	0.00195312	0.0369765	ALG6
1	63891377	A	3	G	13	AF=0.333	0/0/1	1|0	3	0.0212708	0.000114644	ALG6
1	63900731	T	0	C	16	AF=0.667	0/1/1	0|1	3	3.05176e-05	0.00231905	ALG6
1	63906965	G	35	A	45	AF=0.333	0/0/1	1|0	3	0.314307	2.57819e-05	ITGB3BP
1	63952257	T	0	C	16	AF=0.333	0/0/1	1|0	3	3.05176e-05	2.28617e-08	ITGB3BP
1	64002856	G	1	A	24	AF=0.333	0/0/1	1|0	3	1.54972e-06	5.87915e-11	EFCAB7
1	65694612	C	3	T	62	AF=0.667	0/1/1	0|1	3	2.48423e-15	3.76475e-08	AK4
1	65694697	T	4	G	79	AF=0.667	0/1/1	0|1	3	3.99733e-19	5.33604e-10	AK4
1	65695054	G	10	A	67	AF=0.667	0/1/1	0|1	3	1.69674e-11	8.19845e-05	AK4
1	65696189	T	11	G	50	AF=0.667	0/1/1	0|1	3	4.58883e-07	0.00979118	AK4
1	65858145	G	64	A	76	AF=0.333	0/0/1	1|0	3	0.352584	3.54318e-07	DNAJC6
1	65860687	A	81	C	74	AF=0.333	0/0/1	1|0	3	0.629998	0.000223776	DNAJC6
1	65888231	G	7	A	47	AF=0.667	0/1/1	0|1	3	2.29186e-08	0.00123402	LEPR, LEPROT
1	65888560	G	0	A	12	AF=0.667	0/1/1	0|1	3	0.000488281	0.0115796	LEPR, LEPROT
1	65890397	A	0	G	13	AF=0.667	0/1/1	0|1	3	0.000244141	0.00680515	LEPR, LEPROT
1	65891901	A	26	T	25	AF=0.333	0/0/1	1|0	3	1	0.0247027	LEPR, LEPROT
1	65895264	A	5	G	15	AF=0.333	0/0/1	1|0	3	0.0413895	0.000165244	LEPR, LEPROT
1	65897981	G	333	A	232	AF=0.333	0/0/1	1|0	3	2.47012e-05	0.000120106	LEPR, LEPROT
1	65898996	C	82	T	346	AF=0.667	0/1/1	0|1	3	1.17829e-39	1.01598e-10	LEPR, LEPROT
1	65934354	T	0	C	10	AF=0.333	0/0/1	1|0	3	0.00195312	1.67665e-05	LEPR
1	67676270	C	1	T	21	AF=0.667	0/1/1	0|1	3	1.09673e-05	0.00248782	IL23R
1	67689608	A	1	G	9	AF=0.333	0/0/1	1|0	3	0.0214844	0.0003526	IL23R
1	67691766	C	0	T	14	AF=0.667	0/1/1	0|1	3	0.00012207	0.00745572	IL23R
1	67722216	C	35	A	26	AF=0.667	0/1/1	0|1	3	0.305677	0.000116794	IL23R
1	67722894	G	3	A	25	AF=0.667	0/1/1	0|1	3	2.74405e-05	0.00882479	IL23R
1	67818577	C	0	T	14	AF=0.667	0/1/1	0|1	3	0.00012207	0.00745572	IL12RB2
1	67856021	A	0	G	16	AF=0.667	0/1/1	0|1	3	3.05176e-05	0.00231905	IL12RB2
1	67875533	T	17	A	89	AF=0.667	0/1/1	0|1	3	5.91208e-13	7.88617e-05	SERBP1
1	67888763	A	32	G	34	AF=0.667	0/1/1	0|1	3	0.902159	0.0124491	SERBP1
1	68152388	T	21	C	18	AF=0.667	0/1/1	0|1	3	0.749259	0.009858	GADD45A
1	68167491	C	1	T	27	AF=0.667	0/1/1	0|1	3	2.16067e-07	0.000372518	GNG12
1	68296104	G	0	C	12	AF=0.333	0/0/1	1|0	3	0.000488281	1.85922e-06	GNG12
1	68946767	T	2	C	23	AF=0.667	0/1/1	0|1	3	1.94311e-05	0.00516903	DEPDC1
1	68953736	C	2	G	18	AF=0.667	0/1/1	0|1	3	0.000402451	0.0305843	DEPDC1
1	68953853	T	0	C	18	AF=0.667	0/1/1	0|1	3	7.62939e-06	0.000825895	DEPDC1
1	70019517	T	8	C	64	AF=0.333	0/0/1	1|0	3	5.76552e-12	1.36391e-22	None
1	70031291	G	22	A	20	AF=0.667	0/1/1	1|0	3	0.877614	0.0130199	None
1	70608132	G	0	A	22	AF=0.333	0/0/1	0|1	3	4.76837e-07	3.11726e-11	None
1	70690540	C	40	T	33	AF=0.667	0/1/1	1|0	3	0.482789	0.000165141	SRSF11
1	70714622	A	11	C	28	AF=0.333	0/0/1	0|1	3	0.0094753	1.15372e-06	SRSF11
1	70745071	T	0	C	10	AF=0.667	0/1/1	1|0	3	0.00195312	0.0369765	ANKRD13C
1	70820880	G	15	A	8	AF=0.667	0/1/1	1|0	3	0.21004	0.00285358	HHLA3
1	70825916	G	0	A	20	AF=0.667	0/1/1	1|0	3	1.90735e-06	0.000468994	HHLA3
1	70887076	A	12	T	3	AF=0.667	0/1/1	1|0	3	0.0351562	0.000282079	CTH
1	70904800	G	189	T	139	AF=0.333	0/0/1	0|1	3	0.00672932	0.000656422	CTH
1	70905960	T	5	C	10	AF=0.333	0/0/1	0|1	3	0.301758	0.0107384	None
1	71413834	T	0	C	10	AF=0.667	0/1/1	1|0	3	0.00195312	0.0369765	PTGER3
1	71455470	T	0	C	23	AF=0.667	0/1/1	1|0	3	2.38419e-07	0.000170706	PTGER3
1	71455579	C	0	A	22	AF=0.667	0/1/1	1|0	3	4.76837e-07	0.000165688	PTGER3
1	71477539	A	18	G	6	AF=0.667	0/1/1	1|0	3	0.0226558	3.54342e-05	PTGER3
1	71504678	A	2	C	25	AF=0.667	0/1/1	1|0	3	5.64754e-06	0.00333979	PTGER3
1	71510419	G	0	T	11	AF=0.667	0/1/1	1|0	3	0.000976562	0.0203885	PTGER3
1	71531596	A	100	G	68	AF=0.667	0/1/1	1|0	3	0.0165134	5.37818e-12	ZRANB2, ZRANB2-AS1
1	71545970	G	0	A	13	AF=0.667	0/1/1	1|0	3	0.000244141	0.00680515	ZRANB2
1	74665060	C	0	G	10	AF=0.667	0/1/1	1|0	3	0.00195312	0.0369765	FPGT, FPGT-TNNI3K
1	74670172	A	18	G	78	AF=0.667	0/1/1	1|0	3	4.44694e-10	0.00224632	FPGT, FPGT-TNNI3K
1	74671519	A	47	G	56	AF=0.333	0/0/1	0|1	3	0.430689	1.33282e-05	FPGT, FPGT-TNNI3K
1	74672474	G	67	A	64	AF=0.333	0/0/1	0|1	3	0.861369	0.000267147	FPGT, FPGT-TNNI3K
1	74672640	T	79	A	78	AF=0.333	0/0/1	0|1	3	1	2.78624e-05	FPGT, FPGT-TNNI3K
1	74675035	A	14	G	5	AF=0.667	0/1/1	1|0	3	0.0635681	0.00037634	FPGT-TNNI3K
1	75668574	G	18	A	45	AF=0.333	0/0/1	1|0	3	0.000898047	9.77671e-10	SLC44A5
1	75670670	C	1	A	27	AF=0.333	0/0/1	1|0	3	2.16067e-07	2.42635e-12	SLC44A5
1	75671687	T	11	C	21	AF=0.333	0/0/1	1|0	3	0.110184	0.000224731	SLC44A5
1	75672134	T	17	C	22	AF=0.333	0/0/1	1|0	3	0.522397	0.00340216	SLC44A5
1	75672376	A	47	G	16	AF=0.667	0/1/1	0|1	3	0.000117055	3.24455e-11	SLC44A5
1	75674298	G	7	A	20	AF=0.333	0/0/1	1|0	3	0.0191573	1.74735e-05	SLC44A5
1	75675142	G	8	A	19	AF=0.333	0/0/1	1|0	3	0.052239	0.000108734	SLC44A5
1	75681511	T	11	C	8	AF=0.667	0/1/1	0|1	3	0.647606	0.0286644	SLC44A5
1	76259652	G	90	T	130	AF=0.667	0/1/1	0|1	3	0.00840545	0.0182043	RABGGTB
1	77555737	C	38	T	36	AF=0.333	0/0/1	1|0	3	0.907561	0.00645141	PIGK
1	77558057	G	56	C	52	AF=0.333	0/0/1	1|0	3	0.772989	0.00146342	PIGK
1	78166978	C	0	T	11	AF=0.667	0/1/1	0|1	3	0.000976562	0.0203885	USP33
1	78168758	C	27	A	18	AF=0.667	0/1/1	0|1	3	0.232693	0.000354011	USP33
1	78184325	A	125	G	158	AF=0.667	0/1/1	0|1	3	0.0569527	0.000146688	USP33
1	78201745	G	240	T	299	AF=0.667	0/1/1	0|1	3	0.0124099	6.16948e-08	USP33
1	78254258	C	15	T	11	AF=0.667	0/1/1	0|1	3	0.557197	0.0116391	FAM73A
1	78257104	G	0	A	14	AF=0.667	0/1/1	0|1	3	0.00012207	0.00745572	FAM73A
1	78266417	C	0	T	16	AF=0.667	0/1/1	0|1	3	3.05176e-05	0.00231905	FAM73A
1	78334255	A	8	G	18	AF=0.333	0/0/1	1|0	3	0.0755187	0.000221127	FAM73A
1	78412779	C	127	A	134	AF=0.667	0/1/1	0|1	3	0.710423	3.38872e-07	FUBP1
1	78415271	A	8	G	43	AF=0.667	0/1/1	0|1	3	6.86712e-07	0.00696961	FUBP1
1	78419569	A	49	G	35	AF=0.667	0/1/1	0|1	3	0.155656	3.77612e-06	FUBP1
1	78421785	G	4	A	32	AF=0.667	0/1/1	0|1	3	1.94157e-06	0.00397731	FUBP1
1	78425189	T	3	C	27	AF=0.667	0/1/1	0|1	3	8.43033e-06	0.00576018	FUBP1
1	78426284	T	1	C	16	AF=0.667	0/1/1	0|1	3	0.000274658	0.0176523	FUBP1
1	78426455	G	0	A	25	AF=0.667	0/1/1	0|1	3	5.96046e-08	5.54938e-05	FUBP1
1	78426483	C	0	A	28	AF=0.667	0/1/1	0|1	3	7.45058e-09	1.95933e-05	FUBP1
1	78429408	G	15	C	14	AF=0.667	0/1/1	0|1	3	1	0.0471081	FUBP1
1	78438138	G	13	T	5	AF=0.667	0/1/1	0|1	3	0.0962524	0.00152619	FUBP1
1	83107700	G	0	A	11	AF=0.667	0/1/1	0|1	3	0.000976562	0.0203885	None
1	84761174	A	0	G	21	AF=0.667	0/1/1	1|0	3	9.53674e-07	0.000274119	None
1	84761348	T	0	C	14	AF=0.667	0/1/1	1|0	3	0.00012207	0.00745572	None
1	85147644	C	1	T	14	AF=0.333	0/0/1	0|1	3	0.000976562	2.13136e-06	SSX2IP
1	85148463	T	0	G	21	AF=0.667	0/1/1	1|0	3	9.53674e-07	0.000274119	SSX2IP
1	85641435	G	3	A	82	AF=0.667	0/1/1	1|0	3	5.2953e-21	2.6285e-11	SYDE2
1	85643504	G	17	C	72	AF=0.667	0/1/1	1|0	3	3.17274e-09	0.00460998	SYDE2
1	85644174	G	21	A	5	AF=0.667	0/1/1	1|0	3	0.00249392	9.13696e-07	SYDE2
1	85646151	G	13	A	8	AF=0.667	0/1/1	1|0	3	0.38331	0.00906972	SYDE2
1	85720013	T	32	C	6	AF=0.333	0/0/1	0|1	3	2.43426e-05	0.0240974	C1orf52
1	85721911	T	74	C	19	AF=0.333	0/0/1	0|1	3	7.72092e-09	0.00801525	C1orf52
1	85732065	A	12	G	19	AF=0.333	0/0/1	0|1	3	0.281042	0.00176046	BCL10
1	85732941	A	64	C	52	AF=0.333	0/0/1	0|1	3	0.30709	0.0102274	BCL10
1	86097651	T	0	C	15	AF=0.667	0/1/1	1|0	3	6.10352e-05	0.00409135	None
1	86117583	T	7	C	26	AF=0.333	0/0/1	0|1	3	0.00131873	1.10079e-07	ZNHIT6
1	86118445	C	68	A	70	AF=0.333	0/0/1	0|1	3	0.932202	2.70517e-05	ZNHIT6
1	86118587	A	49	T	10	AF=0.333	0/0/1	0|1	3	2.70628e-07	0.00805292	ZNHIT6
1	86119295	A	92	G	74	AF=0.333	0/0/1	0|1	3	0.186854	0.0029045	ZNHIT6
1	87170493	T	10	G	22	AF=0.333	0/0/1	0|1	3	0.0501025	4.66981e-05	SH3GLB1
1	87207942	A	76	G	82	AF=0.333	0/0/1	0|1	3	0.690925	1.70702e-06	SH3GLB1
1	87208953	T	67	A	59	AF=0.333	0/0/1	0|1	3	0.533053	0.00172631	SH3GLB1
1	87209658	G	4	A	18	AF=0.333	0/0/1	0|1	3	0.00434351	4.08648e-06	SH3GLB1
1	87212999	A	149	G	42	AF=0.333	0/0/1	0|1	3	3.04437e-15	0.000702977	SH3GLB1
1	87368653	C	22	T	22	AF=0.667	0/1/1	1|0	3	1	0.0242901	42993
1	89144053	A	0	G	11	AF=0.333	0/0/1	0|1	3	0.000976562	5.58324e-06	AK123834
1	89144256	G	0	C	10	AF=0.333	0/0/1	0|1	3	0.00195312	1.67665e-05	AK123834
1	89147325	T	1	C	15	AF=0.333	0/0/1	0|1	3	0.000518799	7.55533e-07	AK123834
1	89148793	G	0	T	14	AF=0.333	0/0/1	0|1	3	0.00012207	2.06167e-07	AK123834
1	89225976	T	44	C	40	AF=0.333	0/0/1	0|1	3	0.743644	0.00738549	PKN2
1	89271574	T	50	C	11	AF=0.333	0/0/1	0|1	3	4.58883e-07	0.00979118	PKN2
1	89301123	C	86	T	16	AF=0.333	0/0/1	0|1	3	9.13466e-13	8.46657e-05	PKN2
1	89415576	T	4	C	23	AF=0.667	0/1/1	1|0	3	0.000310749	0.0420033	CCBL2
1	89416738	C	29	G	23	AF=0.667	0/1/1	1|0	3	0.488456	0.00100931	CCBL2
1	89418231	G	15	A	85	AF=0.667	0/1/1	1|0	3	4.82542e-13	4.5857e-05	CCBL2
1	89418403	C	41	T	53	AF=0.667	0/1/1	1|0	3	0.256442	0.0375443	CCBL2
1	89422472	T	0	G	15	AF=0.667	0/1/1	1|0	3	6.10352e-05	0.00409135	CCBL2
1	89425939	C	0	T	10	AF=0.667	0/1/1	1|0	3	0.00195312	0.0369765	CCBL2
1	89447978	T	81	A	32	AF=0.667	0/1/1	1|0	3	4.54704e-06	1.1062e-16	CCBL2, RBMXL1
1	89452540	C	0	T	26	AF=0.667	0/1/1	1|0	3	2.98023e-08	3.33595e-05	CCBL2, RBMXL1
1	89992099	T	12	A	9	AF=0.667	0/1/1	1|0	3	0.663624	0.0339537	LRRC8B
1	90133034	C	0	T	17	AF=0.667	0/1/1	1|0	3	1.52588e-05	0.00136129	LRRC8C
1	90294827	A	47	G	26	AF=0.667	0/1/1	1|0	3	0.0186178	6.69837e-08	LRRC8D
1	90305865	A	8	T	51	AF=0.667	0/1/1	1|0	3	9.05239e-09	0.000799436	LRRC8D
1	91274094	T	0	C	10	AF=0.667	0/1/1	1|0	3	0.00195312	0.0369765	None
1	91325323	T	0	G	13	AF=0.667	0/1/1	1|0	3	0.000244141	0.00680515	None
1	91465755	T	0	C	12	AF=0.667	0/1/1	1|0	3	0.000488281	0.0115796	ZNF644
1	91731426	T	0	G	14	AF=0.667	0/1/1	1|0	3	0.00012207	0.00745572	HFM1
1	91773489	C	2	A	14	AF=0.333	0/0/1	0/1	3	0.00418091	1.17621e-05	HFM1
1	91781413	T	21	G	18	AF=0.667	0/1/1	1|0	3	0.749259	0.009858	HFM1
1	91976541	G	0	A	10	AF=0.667	0/1/1	1|0	3	0.00195312	0.0369765	CDC7
1	91980447	A	234	G	368	AF=0.667	0/1/1	1|0	3	5.25797e-08	0.00428387	CDC7
1	91981876	C	2	T	27	AF=0.667	0/1/1	1|0	3	1.62423e-06	0.00131338	CDC7
1	91982094	G	1	A	19	AF=0.667	0/1/1	1|0	3	4.00543e-05	0.00702443	CDC7
1	91985092	A	9	T	5	AF=0.667	0/1/1	1|0	3	0.42395	0.0207631	CDC7
1	92146890	A	6	G	16	AF=0.333	0/0/1	0|1	3	0.0524788	0.000315891	TGFBR3
1	92146917	C	18	A	7	AF=0.667	0/1/1	1|0	3	0.0432853	0.000127067	TGFBR3
1	92148839	T	27	C	31	AF=0.333	0/0/1	0|1	3	0.694004	0.00189624	TGFBR3
1	92149096	C	17	T	46	AF=0.333	0/0/1	0|1	3	0.000336709	1.44176e-10	TGFBR3
1	92149139	C	25	T	40	AF=0.333	0/0/1	0|1	3	0.0816815	4.06222e-06	TGFBR3
1	92177938	A	46	G	79	AF=0.333	0/0/1	0|1	3	0.00402473	1.17288e-11	TGFBR3
1	92185657	C	68	T	30	AF=0.667	0/1/1	1|0	3	0.000156158	4.41516e-13	TGFBR3
1	92203668	G	0	A	17	AF=0.667	0/1/1	1|0	3	1.52588e-05	0.00136129	TGFBR3
1	92262874	T	0	C	32	AF=0.333	0/0/1	0|1	3	4.65661e-10	5.22655e-16	TGFBR3
1	92358186	G	0	C	14	AF=0.333	0/0/1	0|1	3	0.00012207	2.06167e-07	TGFBR3
1	92359945	C	0	G	16	AF=0.333	0/0/1	0|1	3	3.05176e-05	2.28617e-08	TGFBR3
1	92364555	A	0	G	12	AF=0.333	0/0/1	0|1	3	0.000488281	1.85922e-06	TGFBR3
1	92371722	A	0	T	13	AF=0.333	0/0/1	0|1	3	0.000244141	6.1912e-07	None
1	92724430	A	0	G	16	AF=0.667	0/1/1	1|0	3	3.05176e-05	0.00231905	GLMN
1	92727140	C	0	A	15	AF=0.333	0/0/1	0|1	3	6.10352e-05	6.86536e-08	GLMN
1	92738281	C	3	T	20	AF=0.667	0/1/1	1|0	3	0.000488281	0.0451487	GLMN
1	92740935	T	0	C	42	AF=0.667	0/1/1	1|0	3	4.54747e-13	5.67804e-08	GLMN
1	92820954	G	0	A	12	AF=0.667	0/1/1	1|0	3	0.000488281	0.0115796	RPAP2
1	92856159	A	0	G	10	AF=0.667	0/1/1	1|0	3	0.00195312	0.0369765	None
1	92862046	T	0	C	12	AF=0.333	0/0/1	0|1	3	0.000488281	1.85922e-06	None
1	92950921	G	0	A	12	AF=0.667	0/1/1	1|0	3	0.000488281	0.0115796	GFI1
1	92975464	C	3	T	40	AF=0.667	0/1/1	1|0	3	3.02134e-09	6.85889e-05	EVI5
1	92975938	T	60	C	15	AF=0.333	0/0/1	0|1	3	1.5878e-07	0.0139908	EVI5
1	92977989	T	0	A	25	AF=0.667	0/1/1	1|0	3	5.96046e-08	5.54938e-05	EVI5
1	93298756	T	9	C	50	AF=0.667	0/1/1	1|0	3	5.26483e-08	0.00226812	FAM69A, RPL5
1	93555682	C	0	T	12	AF=0.667	0/1/1	1|0	3	0.000488281	0.0115796	MTF2
1	93602194	C	28	T	5	AF=0.667	0/1/1	1|0	3	6.61877e-05	1.45442e-09	MTF2
1	93617403	T	18	G	9	AF=0.667	0/1/1	1|0	3	0.122078	0.000659675	TMED5
1	93646207	T	0	C	14	AF=0.667	0/1/1	1|0	3	0.00012207	0.00745572	TMED5
1	93659762	A	0	G	11	AF=0.667	0/1/1	1|0	3	0.000976562	0.0203885	CCDC18
1	93708745	T	0	C	15	AF=0.333	0/0/1	0|1	3	6.10352e-05	6.86536e-08	CCDC18
1	93719430	A	1	C	12	AF=0.333	0/0/1	0|1	3	0.00341797	1.67404e-05	CCDC18
1	93720070	C	268	G	78	AF=0.333	0/0/1	0|1	3	1.58077e-25	1.35159e-05	CCDC18
1	93799239	A	1	G	14	AF=0.667	0/1/1	1|0	3	0.000976562	0.0279688	LOC100131564
1	93801092	C	25	T	21	AF=0.667	0/1/1	1|0	3	0.658738	0.00425429	LOC100131564
1	93802781	G	6	A	78	AF=0.667	0/1/1	1|0	3	4.5431e-17	1.8815e-08	LOC100131564
1	93825638	T	1	A	18	AF=0.667	0/1/1	1|0	3	7.62939e-05	0.00663068	DR1
1	93831392	A	34	G	31	AF=0.333	0/0/1	0|1	3	0.804317	0.0173657	None
1	93831489	G	18	A	18	AF=0.333	0/0/1	0|1	3	1	0.0497778	None
1	93833537	C	2	T	22	AF=0.667	0/1/1	1|0	3	3.5882e-05	0.00811074	None
1	94339844	A	20	C	25	AF=0.333	0/0/1	1|0	3	0.551484	0.00234954	DNTTIP2
1	94343233	T	424	C	164	AF=0.333	0/0/1	1|0	3	1.68395e-27	0.0050888	DNTTIP2
1	94344716	C	237	T	68	AF=0.333	0/0/1	1|0	3	4.52987e-23	3.30848e-05	DNTTIP2
1	94903792	G	0	A	15	AF=0.333	0/0/1	1|0	3	6.10352e-05	6.86536e-08	ABCD3
1	94930345	G	135	A	118	AF=0.333	0/0/1	1|0	3	0.314457	1.27751e-05	ABCD3
1	94951754	T	0	C	15	AF=0.333	0/0/1	1|0	3	6.10352e-05	6.86536e-08	ABCD3
1	95489819	G	0	C	10	AF=0.667	0/1/1	0|1	3	0.00195312	0.0369765	ALG14
1	95605772	G	0	A	14	AF=0.667	0/1/1	0|1	3	0.00012207	0.00745572	TMEM56, TMEM56-RWDD3
1	95606305	G	9	C	44	AF=0.667	0/1/1	0|1	3	1.22085e-06	0.0124369	TMEM56, TMEM56-RWDD3
1	95606370	C	0	T	45	AF=0.667	0/1/1	0|1	3	5.68434e-14	2.02612e-08	TMEM56, TMEM56-RWDD3
1	95658770	T	17	C	14	AF=0.667	0/1/1	0|1	3	0.7201	0.0203061	AK090700, TMEM56, TMEM56-RWDD3
1	95660556	A	11	G	72	AF=0.667	0/1/1	0|1	3	3.91812e-12	5.58305e-05	AK090700, TMEM56, TMEM56-RWDD3
1	95660921	C	14	G	51	AF=0.667	0/1/1	0|1	3	4.47522e-06	0.0480379	AK090700, TMEM56, TMEM56-RWDD3
1	95661033	A	2	G	27	AF=0.667	0/1/1	0|1	3	1.62423e-06	0.00131338	AK090700, TMEM56, TMEM56-RWDD3
1	95661200	G	25	A	10	AF=0.667	0/1/1	0|1	3	0.0166738	5.22567e-06	AK090700, TMEM56, TMEM56-RWDD3
1	95705972	A	46	G	9	AF=0.333	0/0/1	1|0	3	4.33638e-07	0.00635358	RWDD3, TMEM56-RWDD3
1	95709074	A	39	G	8	AF=0.333	0/0/1	1|0	3	5.53962e-06	0.0193246	RWDD3, TMEM56-RWDD3
1	95709939	T	94	G	119	AF=0.333	0/0/1	1|0	3	0.0998562	1.59764e-11	RWDD3, TMEM56-RWDD3
1	95710626	G	31	A	25	AF=0.667	0/1/1	0|1	3	0.504404	0.000907118	RWDD3
1	97189288	T	9	A	3	AF=0.667	0/1/1	0|1	3	0.145996	0.00382585	PTBP2
1	97208742	C	0	G	10	AF=0.667	0/1/1	0|1	3	0.00195312	0.0369765	PTBP2
1	97260472	C	42	T	36	AF=0.667	0/1/1	0|1	3	0.571587	0.000252292	PTBP2
1	97263793	C	0	G	12	AF=0.667	0/1/1	0|1	3	0.000488281	0.0115796	PTBP2
1	97275193	A	0	G	12	AF=0.667	0/1/1	0|1	3	0.000488281	0.0115796	PTBP2
1	97287825	G	14	T	12	AF=0.667	0/1/1	0|1	3	0.845019	0.0357312	None
1	100170502	T	12	C	22	AF=0.333	0/0/1	1|0	3	0.121449	0.000195692	None
1	100173730	T	46	C	47	AF=0.333	0/0/1	1|0	3	1	0.000602443	None
1	100350383	G	0	A	12	AF=0.333	0/0/1	1|0	3	0.000488281	1.85922e-06	AGL
1	100542990	A	23	C	15	AF=0.667	0/1/1	0|1	3	0.255875	0.000785492	HIAT1
1	100556546	T	10	C	5	AF=0.667	0/1/1	0|1	3	0.301758	0.0107384	SASS6
1	100563000	T	0	C	27	AF=0.667	0/1/1	0|1	3	1.49012e-08	3.53136e-05	SASS6
1	100612675	A	92	G	30	AF=0.333	0/0/1	1|0	3	1.64672e-08	0.0435052	TRMT13
1	100656494	A	15	G	4	AF=0.667	0/1/1	0|1	3	0.0192108	5.98543e-05	DBT
1	100728138	A	2	G	17	AF=0.667	0/1/1	0|1	3	0.000728607	0.0480743	None
1	100728920	C	0	T	28	AF=0.667	0/1/1	0|1	3	7.45058e-09	1.95933e-05	None
1	100730282	G	43	A	26	AF=0.667	0/1/1	0|1	3	0.0532894	1.06992e-06	None
1	100730518	G	7	A	32	AF=0.667	0/1/1	0|1	3	7.02548e-05	0.0421183	None
1	100732681	A	0	G	12	AF=0.667	0/1/1	0|1	3	0.000488281	0.0115796	RTCA
1	100733552	T	0	C	23	AF=0.667	0/1/1	0|1	3	2.38419e-07	0.000170706	RTCA
1	100744105	T	0	C	29	AF=0.667	0/1/1	0|1	3	3.72529e-09	1.12887e-05	RTCA
1	100751055	G	0	C	10	AF=0.667	0/1/1	0|1	3	0.00195312	0.0369765	RTCA
1	100754583	T	8	G	4	AF=0.667	0/1/1	0|1	3	0.387695	0.0263932	RTCA
1	100754660	A	1	G	15	AF=0.667	0/1/1	0|1	3	0.000518799	0.0296204	RTCA
1	100757763	T	25	C	87	AF=0.667	0/1/1	0|1	3	3.22512e-09	0.0156733	RTCA
1	100859992	A	7	T	10	AF=0.333	0/0/1	1|0	3	0.629059	0.0368036	CDC14A
1	100873914	A	4	G	14	AF=0.333	0/0/1	0/1	3	0.0308838	0.00014314	CDC14A
1	100876590	T	0	C	13	AF=0.667	0/1/1	0|1	3	0.000244141	0.00680515	CDC14A
1	100965942	G	1	A	14	AF=0.667	0/1/1	0|1	3	0.000976562	0.0279688	CDC14A
1	100978714	A	0	T	29	AF=0.667	0/1/1	0|1	3	3.72529e-09	1.12887e-05	CDC14A
1	101338482	A	103	G	116	AF=0.667	0/1/1	0|1	3	0.417494	2.84769e-05	EXTL2
1	101340134	C	12	T	17	AF=0.333	0/0/1	0|1	3	0.458258	0.00539631	EXTL2
1	101350306	C	27	T	5	AF=0.333	0/0/1	1|0	3	0.000113074	0.0379824	EXTL2
1	101459625	A	8	T	12	AF=0.333	0/0/1	1|0	3	0.503445	0.0161994	DPH5
1	101494825	G	0	A	10	AF=0.333	0/0/1	1|0	3	0.00195312	1.67665e-05	BX538249
1	103123557	G	0	A	14	AF=0.667	0/1/1	0|1	3	0.00012207	0.00745572	None
1	107599918	C	76	T	50	AF=0.5	0/0/1/1	0|1	4	0.0255434	0.0255434	PRMT6
1	107600279	G	58	A	26	AF=0.5	0/0/1/1	0|1	4	0.000627947	0.000627947	PRMT6
1	108742123	C	12	G	3	AF=0.5	0/0/1/1	1|0	4	0.0351562	0.0351562	SLC25A24
1	108854245	C	6	T	18	AF=0.5	0/0/1/1	0|1	4	0.0226558	0.0226558	None
1	108857903	C	0	T	12	AF=0.5	0/0/1/1	0|1	4	0.000488281	0.000488281	None
1	108858634	T	0	C	18	AF=0.5	0/0/1/1	0|1	4	7.62939e-06	7.62939e-06	None
1	108859314	T	1	C	13	AF=0.5	0/0/1/1	0|1	4	0.00183105	0.00183105	None
1	108868263	G	8	T	34	AF=0.5	0/0/1/1	0|1	4	6.87711e-05	6.87711e-05	None
1	108870158	T	0	C	38	AF=0.5	0/0/1/1	0|1	4	7.27596e-12	7.27596e-12	None
1	108870525	A	38	G	19	AF=0.5	0/0/1/1	0|1	4	0.0163481	0.0163481	None
1	109323501	A	6	G	17	AF=0.5	0/0/1/1	1|0	4	0.0346897	0.0346897	STXBP3
1	109324694	A	3	G	16	AF=0.5	0/0/1/1	1|0	4	0.00442505	0.00442505	STXBP3
1	109419841	C	60	T	156	AF=0.5	0/0/1/1	0|1	4	4.91365e-11	4.91365e-11	AKNAD1, GPSM2
1	109440215	G	151	A	108	AF=0.5	0/0/1/1	0|1	4	0.00893119	0.00893119	AKNAD1, GPSM2
1	109451302	T	0	C	10	AF=0.5	0/0/1/1	0|1	4	0.00195312	0.00195312	AKNAD1, GPSM2
1	109466858	G	19	A	75	AF=0.5	0/0/1/1	0|1	4	4.81814e-09	4.81814e-09	AKNAD1, GPSM2
1	109468120	C	9	G	24	AF=0.5	0/0/1/1	0|1	4	0.013531	0.013531	AKNAD1, GPSM2
1	109468824	C	2	G	10	AF=0.5	0/0/1/1	1|0	4	0.0385742	0.0385742	AKNAD1, GPSM2
1	109470126	A	14	G	30	AF=0.5	0/0/1/1	0|1	4	0.0226288	0.0226288	AKNAD1, GPSM2
1	109470185	T	72	C	33	AF=0.5	0/0/1/1	0|1	4	0.000178357	0.000178357	AKNAD1, GPSM2
1	109470268	G	45	A	24	AF=0.5	0/0/1/1	0|1	4	0.0154323	0.0154323	AKNAD1, GPSM2
1	109470269	C	45	T	24	AF=0.5	0/0/1/1	0|1	4	0.0154323	0.0154323	AKNAD1, GPSM2
1	109473527	C	34	T	9	AF=0.5	0/0/1/1	0|1	4	0.000170155	0.000170155	AKNAD1, CLCC1, GPSM2
1	109473826	G	117	A	74	AF=0.5	0/0/1/1	0|1	4	0.00228746	0.00228746	AKNAD1, CLCC1, GPSM2
1	109479978	G	295	T	438	AF=0.5	0/0/1/1	0|1	4	1.4334e-07	1.4334e-07	AKNAD1, CLCC1
1	109485991	C	5	A	31	AF=0.5	0/0/1/1	0|1	4	1.29135e-05	1.29135e-05	AKNAD1, CLCC1
1	109486016	A	5	G	31	AF=0.5	0/0/1/1	0|1	4	1.29135e-05	1.29135e-05	AKNAD1, CLCC1
1	109486818	A	2	G	15	AF=0.5	0/0/1/1	0|1	4	0.00234985	0.00234985	AKNAD1, CLCC1
1	109495998	G	2	A	10	AF=0.5	0/0/1/1	0|1	4	0.0385742	0.0385742	AKNAD1, CLCC1
1	109499026	G	28	C	5	AF=0.5	0/0/1/1	0|1	4	6.61877e-05	6.61877e-05	AKNAD1, CLCC1
1	109513274	A	3	G	15	AF=0.5	0/0/1/1	0|1	4	0.00753784	0.00753784	WDR47
1	109515028	A	0	C	12	AF=0.5	0/0/1/1	1|0	4	0.000488281	0.000488281	WDR47
1	109540998	A	0	G	12	AF=0.5	0/0/1/1	0|1	4	0.000488281	0.000488281	WDR47
1	109635984	C	1	T	16	AF=0.5	0/0/1/1	0|1	4	0.000274658	0.000274658	TMEM167B
1	109645250	C	0	T	12	AF=0.5	0/0/1/1	0|1	4	0.000488281	0.000488281	None
1	109645365	G	3	A	37	AF=0.5	0/0/1/1	0|1	4	1.9465e-08	1.9465e-08	None
1	109778237	C	5	T	39	AF=0.5	0/0/1/1	0|1	4	1.40516e-07	1.40516e-07	SARS
1	109778577	T	29	C	9	AF=0.5	0/0/1/1	0|1	4	0.00165805	0.00165805	SARS
1	109813510	A	0	T	10	AF=0.5	0/0/1/1	1|0	4	0.00195312	0.00195312	CELSR2
1	109825591	C	15	T	43	AF=0.5	0/0/1/1	1|0	4	0.000306947	0.000306947	PSRC1
1	109856306	G	160	A	91	AF=0.5	0/0/1/1	0|1	4	1.57712e-05	1.57712e-05	SORT1
1	109884775	T	295	G	216	AF=0.5	0/0/1/1	0|1	4	0.000546822	0.000546822	SORT1
1	109893210	G	0	T	11	AF=0.5	0/0/1/1	1|0	4	0.000976562	0.000976562	SORT1
1	109926828	T	3	C	26	AF=0.5	0/0/1/1	0|1	4	1.52364e-05	1.52364e-05	SORT1
1	109931908	C	4	T	15	AF=0.5	0/0/1/1	0|1	4	0.0192108	0.0192108	SORT1
1	109935325	C	8	T	23	AF=0.5	0/0/1/1	0|1	4	0.0106738	0.0106738	SORT1
1	109935427	A	4	G	19	AF=0.5	0/0/1/1	0|1	4	0.00259948	0.00259948	SORT1
1	109937916	C	0	T	11	AF=0.5	0/0/1/1	0|1	4	0.000976562	0.000976562	SORT1
1	109937931	C	0	T	11	AF=0.5	0/0/1/1	0|1	4	0.000976562	0.000976562	SORT1
1	109950858	T	113	C	62	AF=0.5	0/0/1/1	0|1	4	0.000142211	0.000142211	PSMA5
1	109951711	T	59	C	25	AF=0.5	0/0/1/1	0|1	4	0.000266451	0.000266451	PSMA5
1	109955010	C	0	A	10	AF=0.5	0/0/1/1	0|1	4	0.00195312	0.00195312	PSMA5
1	109960270	C	6	A	18	AF=0.5	0/0/1/1	0|1	4	0.0226558	0.0226558	PSMA5
1	109962642	G	2	C	33	AF=0.5	0/0/1/1	0|1	4	3.6729e-08	3.6729e-08	PSMA5
1	109963119	T	2	C	18	AF=0.5	0/0/1/1	0|1	4	0.000402451	0.000402451	PSMA5
1	110037709	C	4	T	15	AF=0.5	0/0/1/1	0|1	4	0.0192108	0.0192108	CYB561D1
1	110047333	G	0	A	15	AF=0.5	0/0/1/1	1|0	4	6.10352e-05	6.10352e-05	None
1	110140099	A	1	T	13	AF=0.25	0/0/0/1	0|1	4	0.00183105	1.60187e-07	None
1	110170896	T	44	C	83	AF=0.5	0/0/1/1	0|1	4	0.000684609	0.000684609	AMPD2
1	110171525	C	0	G	30	AF=0.5	0/0/1/1	0|1	4	1.86265e-09	1.86265e-09	AMPD2
1	110173775	G	35	T	70	AF=0.5	0/0/1/1	0|1	4	0.000821453	0.000821453	AMPD2
1	110197447	G	6	A	17	AF=0.5	0/0/1/1	1|0	4	0.0346897	0.0346897	None
1	110200360	T	1	C	40	AF=0.5	0/0/1/1	1|0	4	3.81988e-11	3.81988e-11	GSTM2, GSTM4
1	110208089	A	0	T	10	AF=0.5	0/0/1/1	1|0	4	0.00195312	0.00195312	GSTM2, GSTM4
1	110438926	C	4	T	18	AF=0.5	0/0/1/1	0|1	4	0.00434351	0.00434351	None
1	110439636	C	4	T	24	AF=0.5	0/0/1/1	1|0	4	0.000179991	0.000179991	None
1	110585137	A	35	G	11	AF=0.5	0/0/1/1	1|0	4	0.000535585	0.000535585	STRIP1
1	110589579	G	11	A	27	AF=0.5	0/0/1/1	0|1	4	0.013853	0.013853	STRIP1
1	110598577	A	24	C	51	AF=0.5	0/0/1/1	1|0	4	0.00244423	0.00244423	None
1	110609288	T	0	G	10	AF=0.5	0/0/1/1	1|0	4	0.00195312	0.00195312	ALX3
1	110619716	G	0	C	11	AF=0.5	0/0/1/1	1|0	4	0.000976562	0.000976562	None
1	110801867	C	0	T	24	AF=0.5	0/0/1/1	1|0	4	1.19209e-07	1.19209e-07	None
1	110857664	T	2	A	15	AF=0.5	0/0/1/1	0|1	4	0.00234985	0.00234985	LOC440600
1	110887561	A	20	G	54	AF=0.5	0/0/1/1	1|0	4	9.61299e-05	9.61299e-05	BC069739, RBM15
1	110907020	A	116	T	41	AF=0.5	0/0/1/1	1|0	4	1.72612e-09	1.72612e-09	SLC16A4
1	110949810	A	72	C	21	AF=0.5	0/0/1/1	1|0	4	1.03872e-07	1.03872e-07	LAMTOR5
1	111415841	G	641	A	1045	AF=0.5	0/0/1/1	0|1	4	6.08827e-23	6.08827e-23	CD53
1	111473313	G	1	C	12	AF=0.5	0/0/1/1	1|0	4	0.00341797	0.00341797	None
1	111667745	A	9	G	24	AF=0.5	0/0/1/1	1|0	4	0.013531	0.013531	DRAM2
1	111974935	A	0	G	13	AF=0.5	0/0/1/1	0|1	4	0.000244141	0.000244141	None
1	111979355	C	2	T	11	AF=0.5	0/0/1/1	0|1	4	0.0224609	0.0224609	None
1	111979420	G	26	A	4	AF=0.5	0/0/1/1	1|0	4	5.94761e-05	5.94761e-05	None
1	111983152	A	406	G	317	AF=0.5	0/0/1/1	0|1	4	0.00105125	0.00105125	WDR77
1	111993341	G	10	A	29	AF=0.5	0/0/1/1	0|1	4	0.00337785	0.00337785	ATP5F1
1	111993372	A	40	G	10	AF=0.5	0/0/1/1	1|0	4	2.38613e-05	2.38613e-05	ATP5F1
1	111993963	G	9	C	25	AF=0.5	0/0/1/1	1|0	4	0.00904119	0.00904119	ATP5F1
1	111997063	G	44	T	8	AF=0.5	0/0/1/1	1|0	4	4.03932e-07	4.03932e-07	ATP5F1
1	111998679	C	6	A	26	AF=0.5	0/0/1/1	1|0	4	0.000535053	0.000535053	ATP5F1
1	112000344	T	1	G	12	AF=0.5	0/0/1/1	1|0	4	0.00341797	0.00341797	ATP5F1
1	112001579	T	3	C	16	AF=0.5	0/0/1/1	1|0	4	0.00442505	0.00442505	ATP5F1
1	112162775	C	0	T	10	AF=0.5	0/0/1/1	0|1	4	0.00195312	0.00195312	RAP1A
1	112170151	A	56	G	19	AF=0.5	0/0/1/1	0|1	4	2.24296e-05	2.24296e-05	RAP1A
1	112222619	T	0	C	11	AF=0.5	0/0/1/1	0|1	4	0.000976562	0.000976562	RAP1A
1	112222702	T	0	C	10	AF=0.5	0/0/1/1	0|1	4	0.00195312	0.00195312	RAP1A
1	112222803	A	0	G	11	AF=0.5	0/0/1/1	0|1	4	0.000976562	0.000976562	RAP1A
1	113076756	T	0	C	19	AF=0.5	0/0/1/1	0|1	4	3.8147e-06	3.8147e-06	ST7L
1	113098534	C	1	T	23	AF=0.5	0/0/1/1	0|1	4	2.98023e-06	2.98023e-06	ST7L
1	113117900	T	0	G	11	AF=0.5	0/0/1/1	0|1	4	0.000976562	0.000976562	ST7L
1	113136229	T	0	C	13	AF=0.5	0/0/1/1	0|1	4	0.000244141	0.000244141	ST7L
1	113154400	C	0	T	12	AF=0.5	0/0/1/1	0|1	4	0.000488281	0.000488281	ST7L
1	113154529	C	0	A	14	AF=0.5	0/0/1/1	0|1	4	0.00012207	0.00012207	ST7L
1	113157372	T	1	C	9	AF=0.5	0/0/1/1	0|1	4	0.0214844	0.0214844	ST7L
1	113207531	T	2	C	21	AF=0.5	0/0/1/1	1|0	4	6.60419e-05	6.60419e-05	CAPZA1
1	113208039	T	0	C	13	AF=0.5	0/0/1/1	1|0	4	0.000244141	0.000244141	CAPZA1
1	113214097	G	1383	A	808	AF=0.5	0/0/1/1	1|0	4	5.9215e-35	5.9215e-35	CAPZA1
1	113219388	A	3	T	22	AF=0.5	0/0/1/1	1|0	4	0.000156522	0.000156522	MOV10
1	113236087	C	110	T	39	AF=0.5	0/0/1/1	1|0	4	5.03216e-09	5.03216e-09	MOV10
1	113236421	G	3	A	16	AF=0.5	0/0/1/1	1|0	4	0.00442505	0.00442505	MOV10
1	113454571	A	41	G	10	AF=0.5	0/0/1/1	0|1	4	1.47377e-05	1.47377e-05	SLC16A1
1	113455099	G	429	A	311	AF=0.5	0/0/1/1	0|1	4	1.63581e-05	1.63581e-05	SLC16A1
1	113456546	A	510	T	576	AF=0.5	0/0/1/1	0|1	4	0.0485122	0.0485122	SLC16A1
1	113509091	C	0	A	10	AF=0.5	0/0/1/1	1|0	4	0.00195312	0.00195312	BC047723, BX648855
1	113512186	G	0	A	18	AF=0.5	0/0/1/1	0|1	4	7.62939e-06	7.62939e-06	BC047723
1	113541801	G	0	A	13	AF=0.5	0/0/1/1	0|1	4	0.000244141	0.000244141	BC047723
1	113623724	A	0	G	21	AF=0.5	0/0/1/1	0|1	4	9.53674e-07	9.53674e-07	LRIG2
1	113633186	G	0	A	12	AF=0.5	0/0/1/1	1|0	4	0.000488281	0.000488281	LRIG2
1	113667837	T	10	G	25	AF=0.5	0/0/1/1	1|0	4	0.0166738	0.0166738	None
1	113668998	C	13	G	4	AF=0.5	0/0/1/1	0|1	4	0.0490417	0.0490417	None
1	113674649	T	13	G	47	AF=0.5	0/0/1/1	1|0	4	1.21467e-05	1.21467e-05	None
1	113693655	G	1	A	10	AF=0.5	0/0/1/1	1|0	4	0.0117188	0.0117188	None
1	114256379	C	0	G	12	AF=0.5	0/0/1/1	0|1	4	0.000488281	0.000488281	PHTF1
1	114265928	C	0	T	19	AF=0.5	0/0/1/1	0|1	4	3.8147e-06	3.8147e-06	PHTF1
1	114291406	G	2	A	19	AF=0.5	0/0/1/1	0|1	4	0.000221252	0.000221252	PHTF1
1	114301335	C	128	T	71	AF=0.25	0/0/0/1	1|0	4	6.46944e-05	0.000759873	PHTF1
1	114311768	G	23	A	6	AF=0.5	0/0/1/1	1|0	4	0.0023157	0.0023157	RSBN1
1	114377568	A	0	G	15	AF=0.5	0/0/1/1	0|1	4	6.10352e-05	6.10352e-05	PTPN22
1	114448389	C	79	T	34	AF=0.5	0/0/1/1	1|0	4	2.77311e-05	2.77311e-05	DCLRE1B
1	114449662	T	81	C	34	AF=0.5	0/0/1/1	1|0	4	1.38003e-05	1.38003e-05	DCLRE1B
1	114455907	G	66	A	93	AF=0.5	0/0/1/1	0|1	4	0.038878	0.038878	DCLRE1B
1	114471583	C	0	G	10	AF=0.5	0/0/1/1	1|0	4	0.00195312	0.00195312	BC036361, BC048113
1	114489973	A	0	G	13	AF=0.5	0/0/1/1	0|1	4	0.000244141	0.000244141	HIPK1
1	114505000	G	32	A	89	AF=0.5	0/0/1/1	0|1	4	2.14992e-07	2.14992e-07	HIPK1
1	114512277	A	0	G	10	AF=0.5	0/0/1/1	0|1	4	0.00195312	0.00195312	HIPK1
1	114512677	C	139	G	90	AF=0.5	0/0/1/1	0|1	4	0.00145981	0.00145981	HIPK1
1	114516330	C	164	T	116	AF=0.5	0/0/1/1	0|1	4	0.00488374	0.00488374	HIPK1
1	114519351	T	88	G	174	AF=0.5	0/0/1/1	1|0	4	1.17404e-07	1.17404e-07	HIPK1
1	114969145	A	7	T	3	AF=0.75	0/1/1/1	0|1	4	0.34375	0.00350571	TRIM33
1	114969146	A	7	T	3	AF=0.75	0/1/1/1	0/1	4	0.34375	0.00350571	TRIM33
1	114969600	G	1	T	12	AF=0.5	0/0/1/1	0|1	4	0.00341797	0.00341797	TRIM33
1	114969641	C	1	T	12	AF=0.5	0/0/1/1	0|1	4	0.00341797	0.00341797	TRIM33
1	114972833	C	2	T	11	AF=0.5	0/0/1/1	0|1	4	0.0224609	0.0224609	TRIM33
1	114972873	G	2	T	11	AF=0.5	0/0/1/1	0|1	4	0.0224609	0.0224609	TRIM33
1	114983871	C	2	T	11	AF=0.5	0/0/1/1	0|1	4	0.0224609	0.0224609	TRIM33
1	115052665	T	1	A	15	AF=0.5	0/0/1/1	0|1	4	0.000518799	0.000518799	TRIM33
1	115262124	G	46	A	19	AF=0.5	0/0/1/1	1|0	4	0.00109008	0.00109008	CSDE1
1	115262590	G	36	A	56	AF=0.5	0/0/1/1	1|0	4	0.0470116	0.0470116	CSDE1
1	115263791	C	3	T	26	AF=0.5	0/0/1/1	1|0	4	1.52364e-05	1.52364e-05	CSDE1
1	115263989	G	6	A	27	AF=0.5	0/0/1/1	1|0	4	0.000324063	0.000324063	CSDE1
1	115282050	G	8	C	20	AF=0.5	0/0/1/1	1|0	4	0.0356981	0.0356981	CSDE1
1	115283111	A	0	G	17	AF=0.5	0/0/1/1	1|0	4	1.52588e-05	1.52588e-05	CSDE1
1	115286071	G	5	A	27	AF=0.5	0/0/1/1	1|0	4	0.000113074	0.000113074	CSDE1
1	116234313	A	50	G	20	AF=0.5	0/0/1/1	0|1	4	0.000440285	0.000440285	VANGL1
1	116234505	A	9	G	51	AF=0.5	0/0/1/1	0|1	4	3.08504e-08	3.08504e-08	VANGL1
1	116239633	T	4	G	13	AF=0.5	0/0/1/1	0|1	4	0.0490417	0.0490417	VANGL1
1	116567296	C	0	T	10	AF=0.5	0/0/1/1	0|1	4	0.00195312	0.00195312	SLC22A15
1	116576458	C	0	T	11	AF=0.5	0/0/1/1	1|0	4	0.000976562	0.000976562	SLC22A15
1	116577258	G	0	A	11	AF=0.5	0/0/1/1	0|1	4	0.000976562	0.000976562	SLC22A15
1	116839995	A	0	T	20	AF=0.5	0/0/1/1	1|0	4	1.90735e-06	1.90735e-06	None
1	116920952	G	0	C	20	AF=0.5	0/0/1/1	1|0	4	1.90735e-06	1.90735e-06	ATP1A1
1	116921019	A	0	G	20	AF=0.5	0/0/1/1	1|0	4	1.90735e-06	1.90735e-06	ATP1A1
1	116924315	C	13	T	4	AF=0.5	0/0/1/1	1|0	4	0.0490417	0.0490417	ATP1A1
1	116931984	A	1	T	9	AF=0.5	0/0/1/1	1|0	4	0.0214844	0.0214844	ATP1A1
1	116932563	T	7	A	22	AF=0.5	0/0/1/1	1|0	4	0.00813006	0.00813006	ATP1A1
1	116932735	T	20	G	7	AF=0.5	0/0/1/1	1|0	4	0.0191573	0.0191573	ATP1A1
1	116932771	G	16	A	4	AF=0.5	0/0/1/1	1|0	4	0.0118179	0.0118179	ATP1A1
1	116938576	C	0	T	11	AF=0.5	0/0/1/1	1|0	4	0.000976562	0.000976562	ATP1A1, ATP1A1OS
1	116939907	G	5	A	24	AF=0.5	0/0/1/1	1|0	4	0.000546113	0.000546113	ATP1A1, ATP1A1OS
1	116945036	T	3	C	21	AF=0.5	0/0/1/1	1|0	4	0.000277162	0.000277162	ATP1A1, ATP1A1OS
1	116945972	C	16	T	4	AF=0.5	0/0/1/1	1|0	4	0.0118179	0.0118179	ATP1A1, ATP1A1OS
1	116947084	C	989	T	805	AF=0.5	0/0/1/1	1|0	4	1.53144e-05	1.53144e-05	ATP1A1, ATP1A1OS
1	117128928	T	0	C	10	AF=0.5	0/0/1/1	0|1	4	0.00195312	0.00195312	IGSF3
1	117530273	A	36	G	81	AF=0.5	0/0/1/1	0|1	4	3.86634e-05	3.86634e-05	PTGFRN
1	117530507	C	105	T	41	AF=0.5	0/0/1/1	0|1	4	1.17304e-07	1.17304e-07	PTGFRN
1	117530511	C	106	T	41	AF=0.5	0/0/1/1	0|1	4	8.08925e-08	8.08925e-08	PTGFRN
1	117531813	T	37	C	73	AF=0.5	0/0/1/1	0|1	4	0.000768985	0.000768985	PTGFRN
1	117531911	A	41	G	65	AF=0.5	0/0/1/1	0|1	4	0.0250213	0.0250213	PTGFRN
1	117532291	A	86	G	53	AF=0.5	0/0/1/1	0|1	4	0.00643481	0.00643481	PTGFRN
1	117532790	C	78	T	181	AF=0.5	0/0/1/1	0|1	4	1.33869e-10	1.33869e-10	PTGFRN
1	117532798	C	61	G	172	AF=0.25	0/0/0/1	0|1	4	1.98874e-13	6.76051e-55	PTGFRN
1	117603156	G	32	T	12	AF=0.5	0/0/1/1	0|1	4	0.00365777	0.00365777	TTF2
1	117612330	G	0	A	18	AF=0.5	0/0/1/1	0|1	4	7.62939e-06	7.62939e-06	TTF2
1	117617588	G	142	A	185	AF=0.5	0/0/1/1	1|0	4	0.0200602	0.0200602	TTF2
1	117617705	A	146	G	239	AF=0.5	0/0/1/1	1|0	4	2.47106e-06	2.47106e-06	TTF2
1	117618067	C	118	T	248	AF=0.5	0/0/1/1	1|0	4	9.46081e-12	9.46081e-12	TTF2
1	117630533	T	6	C	44	AF=0.5	0/0/1/1	0|1	4	3.24374e-08	3.24374e-08	TTF2
1	117644599	A	62	G	193	AF=0.5	0/0/1/1	1|0	4	7.85464e-17	7.85464e-17	TTF2
1	117645634	T	38	C	13	AF=0.5	0/0/1/1	0|1	4	0.000621043	0.000621043	None
1	117645744	A	2	G	26	AF=0.5	0/0/1/1	1|0	4	3.03239e-06	3.03239e-06	None
1	117648269	G	20	A	6	AF=0.5	0/0/1/1	0|1	4	0.00935531	0.00935531	None
1	117654638	G	24	T	6	AF=0.5	0/0/1/1	0|1	4	0.00143091	0.00143091	TRIM45
1	117656276	A	1	G	11	AF=0.5	0/0/1/1	0|1	4	0.00634766	0.00634766	TRIM45
1	117660754	C	36	T	18	AF=0.5	0/0/1/1	0|1	4	0.0198343	0.0198343	TRIM45
1	117663913	C	26	T	9	AF=0.5	0/0/1/1	1|0	4	0.00598812	0.00598812	TRIM45
1	117916458	C	0	A	15	AF=0.5	0/0/1/1	1|0	4	6.10352e-05	6.10352e-05	MAN1A2
1	118026538	C	0	A	18	AF=0.5	0/0/1/1	0|1	4	7.62939e-06	7.62939e-06	MAN1A2
1	118065841	A	12	G	80	AF=0.5	0/0/1/1	0|1	4	1.7156e-13	1.7156e-13	MAN1A2
1	118068672	T	49	C	21	AF=0.5	0/0/1/1	1|0	4	0.00109324	0.00109324	None
1	118069830	A	47	G	24	AF=0.5	0/0/1/1	1|0	4	0.00855454	0.00855454	None
1	118482149	C	273	T	351	AF=0.5	0/0/1/1	0|1	4	0.00202879	0.00202879	WDR3
1	119574074	G	48	C	23	AF=0.5	0/0/1/1	0|1	4	0.00406512	0.00406512	WARS2
1	119673481	C	0	A	10	AF=0.5	0/0/1/1	0|1	4	0.00195312	0.00195312	WARS2
1	119682228	T	0	A	14	AF=0.5	0/0/1/1	1|0	4	0.00012207	0.00012207	WARS2
1	119693477	G	75	A	27	AF=0.5	0/0/1/1	1|0	4	2.14769e-06	2.14769e-06	AK125759, BC034623, BC043601, BC063600
1	119700465	C	20	G	6	AF=0.5	0/0/1/1	1|0	4	0.00935531	0.00935531	AK125759, BC034623, BC043601
1	119722079	A	0	G	29	AF=0.5	0/0/1/1	1|0	4	3.72529e-09	3.72529e-09	AK125759, BC034623, BC043601
1	119722778	A	54	G	10	AF=0.5	0/0/1/1	1|0	4	1.9965e-08	1.9965e-08	AK125759, BC034623, BC043601
1	119723397	C	35	T	14	AF=0.5	0/0/1/1	1|0	4	0.00380165	0.00380165	AK125759, BC034623, BC043601
1	119723880	T	20	C	43	AF=0.5	0/0/1/1	1|0	4	0.0051524	0.0051524	AK125759, BC034623, BC043601
1	119725525	C	36	T	66	AF=0.5	0/0/1/1	1|0	4	0.00386558	0.00386558	AK125759, BC034623, BC043601
1	119725624	G	61	A	23	AF=0.5	0/0/1/1	0|1	4	4.07713e-05	4.07713e-05	AK125759, BC034623, BC043601
1	119730559	A	0	C	17	AF=0.5	0/0/1/1	1|0	4	1.52588e-05	1.52588e-05	AK125759, BC034623
1	119797548	T	0	C	21	AF=0.5	0/0/1/1	1|0	4	9.53674e-07	9.53674e-07	AK125759
1	120162152	A	6	T	30	AF=0.5	0/0/1/1	0|1	4	6.96017e-05	6.96017e-05	ZNF697
1	120162442	T	197	C	124	AF=0.5	0/0/1/1	0|1	4	5.46611e-05	5.46611e-05	ZNF697
1	120163247	T	62	C	36	AF=0.5	0/0/1/1	0|1	4	0.0111745	0.0111745	ZNF697
1	120163248	G	62	A	37	AF=0.5	0/0/1/1	0|1	4	0.0154324	0.0154324	ZNF697
1	120163675	G	56	A	85	AF=0.5	0/0/1/1	0|1	4	0.0180561	0.0180561	ZNF697
1	120164252	G	68	A	106	AF=0.5	0/0/1/1	0|1	4	0.00488778	0.00488778	ZNF697
1	120164303	C	38	T	99	AF=0.5	0/0/1/1	0|1	4	1.87794e-07	1.87794e-07	ZNF697
1	120164738	C	84	T	34	AF=0.5	0/0/1/1	0|1	4	4.72447e-06	4.72447e-06	ZNF697
1	120164966	C	56	T	18	AF=0.5	0/0/1/1	0|1	4	1.10911e-05	1.10911e-05	ZNF697
1	120165826	C	9	T	18	AF=0.25	0/0/0/1	0|1	4	0.122078	6.05048e-06	ZNF697
1	120166681	G	26	A	49	AF=0.5	0/0/1/1	0|1	4	0.0105821	0.0105821	ZNF697
1	120167783	C	0	G	14	AF=0.5	0/0/1/1	0|1	4	0.00012207	0.00012207	ZNF697
1	120168353	G	0	A	14	AF=0.5	0/0/1/1	0|1	4	0.00012207	0.00012207	ZNF697
1	120176127	A	0	G	13	AF=0.5	0/0/1/1	0|1	4	0.000244141	0.000244141	ZNF697
1	120181277	G	0	T	29	AF=0.5	0/0/1/1	0|1	4	3.72529e-09	3.72529e-09	ZNF697
1	120182777	C	0	T	10	AF=0.5	0/0/1/1	1|0	4	0.00195312	0.00195312	ZNF697
1	120254545	G	3	C	32	AF=0.5	0/0/1/1	0|1	4	4.17698e-07	4.17698e-07	PHGDH
1	120257110	T	3	C	11	AF=0.25	0/0/0/1	0|1	4	0.057373	3.98234e-05	PHGDH
1	120260969	A	0	G	22	AF=0.5	0/0/1/1	0|1	4	4.76837e-07	4.76837e-07	PHGDH
1	120270181	C	16	T	4	AF=0.5	0/0/1/1	1|0	4	0.0118179	0.0118179	PHGDH
1	120273560	G	2	A	11	AF=0.5	0/0/1/1	1|0	4	0.0224609	0.0224609	PHGDH
1	120280273	T	0	A	25	AF=0.5	0/0/1/1	0|1	4	5.96046e-08	5.96046e-08	PHGDH
1	120281375	G	0	T	10	AF=0.5	0/0/1/1	0|1	4	0.00195312	0.00195312	PHGDH
1	120284669	A	1	T	45	AF=0.5	0/0/1/1	0|1	4	1.33582e-12	1.33582e-12	PHGDH
1	144014345	C	8	T	11	AF=0.333	0/0/1	0|1	3	0.647606	0.0286644	SRGAP2B
1	144861385	T	17	G	11	AF=0.667	0/1/1	1|0	3	0.344928	0.00397389	LOC100288142, LOC653513, NBPF9, PDE4DIP
1	144865850	G	59	T	60	AF=0.667	0/1/1	1|0	3	1	0.000281953	LOC100288142, LOC653513, NBPF9, PDE4DIP
1	144866643	G	113	A	148	AF=0.667	0/1/1	1|0	3	0.0351294	0.000785999	LOC100288142, LOC653513, NBPF9, PDE4DIP
1	144866662	T	120	C	144	AF=0.667	0/1/1	1|0	3	0.156776	4.70266e-05	LOC100288142, LOC653513, NBPF9, PDE4DIP
1	144868170	C	55	T	60	AF=0.667	0/1/1	1|0	3	0.709323	0.00143252	LOC100288142, LOC653513, NBPF9, PDE4DIP
1	144873371	C	26	G	14	AF=0.667	0/1/1	1|0	3	0.0806905	6.08054e-05	LOC100288142, LOC653513, NBPF9, PDE4DIP
1	144873372	A	26	G	13	AF=0.667	0/1/1	1|0	3	0.0532519	2.38193e-05	LOC100288142, LOC653513, NBPF9, PDE4DIP
1	144873887	C	60	T	83	AF=0.667	0/1/1	1|0	3	0.0654308	0.0328937	LOC100288142, LOC653513, NBPF9, PDE4DIP
1	144874489	G	1	A	14	AF=0.667	0/1/1	1|0	3	0.000976562	0.0279688	LOC100288142, LOC653513, NBPF9, PDE4DIP
1	144874578	C	1	T	14	AF=0.667	0/1/1	1|0	3	0.000976562	0.0279688	LOC100288142, LOC653513, NBPF9, PDE4DIP
1	144874641	G	1	C	15	AF=0.667	0/1/1	1|0	3	0.000518799	0.0296204	LOC100288142, LOC653513, NBPF9, PDE4DIP
1	144874815	T	78	C	102	AF=0.667	0/1/1	1|0	3	0.0861873	0.00549619	LOC100288142, LOC653513, NBPF9, PDE4DIP
1	144875799	G	0	A	13	AF=0.667	0/1/1	1|0	3	0.000244141	0.00680515	LOC100288142, LOC653513, NBPF9, PDE4DIP
1	144882009	C	0	A	10	AF=0.667	0/1/1	1|0	3	0.00195312	0.0369765	LOC100288142, LOC653513, NBPF9, PDE4DIP
1	144886197	A	97	T	72	AF=0.667	0/1/1	1|0	3	0.0645508	1.46002e-10	LOC100288142, LOC653513, NBPF9, PDE4DIP
1	144909956	G	340	A	478	AF=0.333	0/0/1	0/1	3	1.57945e-06	8.43193e-49	LOC100288142, LOC653513, NBPF9, PDE4DIP
1	144913802	C	28	A	7	AF=0.667	0/1/1	1|0	3	0.00050826	1.90296e-08	LOC100288142, LOC653513, NBPF9, PDE4DIP
1	144917546	A	603	G	144	AF=0.667	0/1/1	1|0	3	1.42056e-67	2.3221e-156	LOC100288142, LOC653513, NBPF9, PDE4DIP
1	144932943	T	0	A	15	AF=0.667	0/1/1	1|0	3	6.10352e-05	0.00409135	LOC100288142, LOC653513, NBPF9, PDE4DIP
1	144932963	G	0	C	15	AF=0.667	0/1/1	1|0	3	6.10352e-05	0.00409135	LOC100288142, LOC653513, NBPF9, PDE4DIP
1	144938360	A	0	G	24	AF=0.667	0/1/1	1|0	3	1.19209e-07	9.55543e-05	LOC100288142, LOC653513, NBPF9, PDE4DIP
1	144938399	G	0	C	13	AF=0.667	0/1/1	1|0	3	0.000244141	0.00680515	LOC100288142, LOC653513, NBPF9, PDE4DIP
1	144939710	C	0	T	12	AF=0.667	0/1/1	1|0	3	0.000488281	0.0115796	LOC100288142, LOC653513, NBPF9, PDE4DIP
1	144940226	A	43	G	7	AF=0.667	0/1/1	1|0	3	2.09868e-07	1.85744e-14	LOC100288142, LOC653513, NBPF9, PDE4DIP
1	144945116	G	0	A	28	AF=0.667	0/1/1	1|0	3	7.45058e-09	1.95933e-05	LOC100288142, LOC653513, NBPF9, PDE4DIP
1	144946183	G	10	A	5	AF=0.667	0/1/1	1|0	3	0.301758	0.0107384	LOC100288142, LOC653513, NBPF9, PDE4DIP
1	144988972	A	19	G	7	AF=0.667	0/1/1	1|0	3	0.0289593	6.59744e-05	LOC100288142, LOC653513, NBPF9, PDE4DIP
1	144989131	G	11	T	21	AF=0.333	0/0/1	1|0	3	0.110184	0.000224731	LOC100288142, LOC653513, NBPF9, PDE4DIP
1	144989270	G	46	A	44	AF=0.667	0/1/1	1|0	3	0.916129	0.000487889	LOC100288142, LOC653513, NBPF9, PDE4DIP
1	144990002	C	0	T	17	AF=0.667	0/1/1	0|1	3	1.52588e-05	0.00136129	LOC100288142, LOC653513, NBPF9, PDE4DIP
1	144991176	G	16	T	20	AF=0.333	0/0/1	1|0	3	0.617719	0.00713005	LOC100288142, LOC653513, NBPF9, PDE4DIP
1	144992369	G	32	A	20	AF=0.667	0/1/1	0/1	3	0.126347	4.25617e-05	LOC100288142, LOC653513, NBPF9, PDE4DIP
1	144994902	G	690	A	1186	AF=0.333	0/0/1	0/1	3	1.38182e-30	4.7827e-154	LOC100288142, LOC653513, NBPF9, PDE4DIP
1	145018581	G	8	C	19	AF=0.333	0/0/1	0|1	3	0.052239	0.000108734	LOC100288142, LOC653513, NBPF9, PDE4DIP
1	145097094	T	16	G	3	AF=0.667	0/1/1	0/1	3	0.00442505	7.18582e-06	LOC100288142, NBPF9, SEC22B
1	145102882	G	0	A	14	AF=0.333	0/0/1	0|1	3	0.00012207	2.06167e-07	LOC100288142, NBPF9, SEC22B
1	145103928	G	427	A	290	AF=0.333	0/0/1	0/1	3	3.50875e-07	6.16013e-05	LOC100288142, NBPF9, SEC22B
1	145105244	C	0	A	10	AF=0.333	0/0/1	0|1	3	0.00195312	1.67665e-05	LOC100288142, NBPF9, SEC22B
1	145108434	G	0	T	29	AF=0.333	0/0/1	0/1	3	3.72529e-09	1.41541e-14	LOC100288142, NBPF9, SEC22B
1	145109430	A	0	T	15	AF=0.333	0/0/1	0|1	3	6.10352e-05	6.86536e-08	LOC100288142, NBPF9, SEC22B
1	145109549	G	1	T	614	AF=0.333	0/0/1	0|1	3	9.06073e-183	2.47807e-291	LOC100288142, NBPF9, SEC22B
1	145109583	C	1	A	861	AF=0.667	0/1/1	0/1	3	5.61286e-257	1.82411e-149	LOC100288142, NBPF9, SEC22B
1	145110213	G	0	A	30	AF=0.667	0/1/1	0/1	3	1.86265e-09	6.7397e-06	LOC100288142, NBPF9, SEC22B
1	145111485	A	0	G	22	AF=0.667	0/1/1	0/1	3	4.76837e-07	0.000165688	LOC100288142, NBPF9, SEC22B
1	145111839	T	0	C	24	AF=0.333	0/0/1	0|1	3	1.19209e-07	3.4567e-12	LOC100288142, NBPF9, SEC22B
1	145112428	C	1	T	586	AF=0.333	0/0/1	0|1	3	2.32167e-174	5.56486e-278	LOC100288142, NBPF9, SEC22B
1	145113684	G	0	A	18	AF=0.333	0/0/1	0/1	3	7.62939e-06	2.53511e-09	LOC100288142, NBPF9, SEC22B
1	145114153	T	0	A	17	AF=0.333	0/0/1	0/1	3	1.52588e-05	7.61293e-09	LOC100288142, NBPF9, SEC22B
1	145116679	T	0	C	309	AF=0.333	0/0/1	0|1	3	1.91761e-93	2.72438e-148	LOC100288142, NBPF9, SEC22B
1	145116948	C	0	T	117	AF=0.667	0/1/1	0/1	3	1.20371e-35	3.18416e-21	LOC100288142, NBPF9, SEC22B
1	145118171	G	0	A	196	AF=0.667	0/1/1	0/1	3	1.99136e-59	6.97632e-35	LOC100288142, NBPF9
1	145594799	C	0	T	14	AF=0.667	0/1/1	0|1	3	0.00012207	0.00745572	LOC100288142, NBPF10, POLR3C
1	145633187	C	0	T	14	AF=0.667	0/1/1	0|1	3	0.00012207	0.00745572	LOC100288142, NBPF10, RNF115
1	145690472	C	131	T	28	AF=0.333	0/0/1	1|0	3	3.95116e-17	1.45472e-05	LOC100288142, NBPF10
1	145693383	A	1	G	12	AF=0.333	0/0/1	1|0	3	0.00341797	1.67404e-05	LOC100288142, NBPF10
1	145703590	G	7	T	15	AF=0.333	0/0/1	1|0	3	0.133801	0.00100356	CD160, LOC100288142, NBPF10
1	146628479	C	21	G	19	AF=0.667	0/1/1	0|1	3	0.874629	0.0174576	PRKAB2
1	146628635	A	97	G	29	AF=0.333	0/0/1	1|0	3	9.24479e-10	0.0138448	PRKAB2
1	146629916	C	76	T	23	AF=0.333	0/0/1	1|0	3	8.53433e-08	0.0331025	PRKAB2
1	146714427	G	93	C	103	AF=0.333	0/0/1	1|0	3	0.520422	3.24666e-08	CHD1L
1	146716994	C	0	G	21	AF=0.667	0/1/1	0|1	3	9.53674e-07	0.000274119	CHD1L
1	146718973	G	1	C	10	AF=0.333	0/0/1	1|0	3	0.0117188	0.000128599	CHD1L
1	146731822	C	27	T	21	AF=0.667	0/1/1	0|1	3	0.470879	0.00114477	CHD1L
1	146732231	G	2	A	25	AF=0.667	0/1/1	0|1	3	5.64754e-06	0.00333979	CHD1L
1	146737490	G	11	C	35	AF=0.333	0/0/1	1|0	3	0.000535585	3.51934e-09	CHD1L
1	146739277	T	20	C	12	AF=0.667	0/1/1	0|1	3	0.215327	0.00100806	CHD1L
1	146740986	C	10	T	56	AF=0.667	0/1/1	0|1	3	6.90142e-09	0.00149537	CHD1L
1	146741598	C	44	T	10	AF=0.333	0/0/1	1|0	3	3.38569e-06	0.0206239	CHD1L
1	146741960	A	24	C	4	AF=0.333	0/0/1	1|0	3	0.000179991	0.0426479	CHD1L
1	146742351	C	6	T	36	AF=0.667	0/1/1	0|1	3	2.82888e-06	0.00815499	CHD1L
1	146755549	A	14	G	4	AF=0.667	0/1/1	0|1	3	0.0308838	0.00014314	CHD1L
1	146757923	G	7	A	11	AF=0.333	0/0/1	1|0	3	0.480682	0.0211367	CHD1L
1	146759320	C	538	G	224	AF=0.333	0/0/1	1|0	3	1.20935e-30	0.0232863	CHD1L
1	146765454	C	46	G	8	AF=0.333	0/0/1	1|0	3	1.38434e-07	0.00346748	CHD1L
1	146854539	T	1	C	22	AF=0.667	0/1/1	0|1	3	5.72205e-06	0.00153489	LINC00624
1	146856256	A	0	G	12	AF=0.667	0/1/1	0|1	3	0.000488281	0.0115796	LINC00624
1	147761265	T	10	C	14	AF=0.333	0/0/1	1|0	3	0.541256	0.0151579	AK023809, NBPF8
1	147806559	C	3	T	27	AF=0.667	0/1/1	0|1	3	8.43033e-06	0.00576018	BC041003, NBPF8
1	149224986	A	13	C	22	AF=0.333	0/0/1	0/1	3	0.175465	0.000443023	None
1	150252984	T	3	G	7	AF=0.333	0/0/1	1|0	3	0.34375	0.0195481	C1orf54
1	150267798	T	17	C	25	AF=0.333	0/0/1	1|0	3	0.279956	0.000790888	MRPS21
1	150271080	G	3	A	9	AF=0.333	0/0/1	1|0	3	0.145996	0.00382585	MRPS21
1	150274610	G	2	A	11	AF=0.333	0/0/1	1|0	3	0.0224609	0.000210486	MRPS21
1	150276429	G	0	A	16	AF=0.333	0/0/1	1|0	3	3.05176e-05	2.28617e-08	MRPS21
1	150276872	A	0	G	14	AF=0.333	0/0/1	1|0	3	0.00012207	2.06167e-07	MRPS21
1	150299145	G	5	A	8	AF=0.333	0/0/1	0|1	3	0.581055	0.0396204	PRPF3
1	150300727	T	0	C	13	AF=0.667	0/1/1	0|1	3	0.000244141	0.00680515	PRPF3
1	150307270	T	0	G	14	AF=0.667	0/1/1	0|1	3	0.00012207	0.00745572	PRPF3
1	150376139	T	0	G	11	AF=0.667	0/1/1	0|1	3	0.000976562	0.0203885	RPRD2
1	150376311	G	0	T	12	AF=0.667	0/1/1	0|1	3	0.000488281	0.0115796	RPRD2
1	150376977	C	0	T	15	AF=0.667	0/1/1	0|1	3	6.10352e-05	0.00409135	RPRD2
1	150398531	G	0	A	11	AF=0.667	0/1/1	0|1	3	0.000976562	0.0203885	RPRD2
1	150426224	T	0	C	12	AF=0.667	0/1/1	0|1	3	0.000488281	0.0115796	RPRD2
1	150433819	A	0	G	10	AF=0.667	0/1/1	0|1	3	0.00195312	0.0369765	RPRD2
1	150434631	A	0	G	14	AF=0.667	0/1/1	0|1	3	0.00012207	0.00745572	RPRD2
1	150445819	A	9	G	39	AF=0.667	0/1/1	0|1	3	1.52218e-05	0.0321659	RPRD2
1	150446673	A	44	G	10	AF=0.333	0/0/1	1|0	3	3.38569e-06	0.0206239	RPRD2
1	150447269	G	32	A	39	AF=0.667	0/1/1	0|1	3	0.476688	0.0432496	RPRD2
1	150447462	C	1	T	15	AF=0.667	0/1/1	0|1	3	0.000518799	0.0296204	RPRD2
1	150465953	T	0	G	17	AF=0.667	0/1/1	0|1	3	1.52588e-05	0.00136129	TARS2
1	150467296	G	1	C	14	AF=0.667	0/1/1	0|1	3	0.000976562	0.0279688	TARS2
1	150471056	C	86	T	78	AF=0.667	0/1/1	0|1	3	0.584783	4.87734e-07	TARS2
1	150477061	C	0	T	15	AF=0.667	0/1/1	0|1	3	6.10352e-05	0.00409135	TARS2
1	150479901	C	63	T	180	AF=0.667	0/1/1	0|1	3	3.12327e-14	0.0142342	TARS2
1	150483236	A	11	C	7	AF=0.667	0/1/1	0|1	3	0.480682	0.0211367	ECM1
1	150483840	C	1	T	60	AF=0.667	0/1/1	0|1	3	5.37764e-17	1.2434e-09	ECM1
1	150490565	G	0	A	10	AF=0.667	0/1/1	0|1	3	0.00195312	0.0369765	None
1	150522242	T	77	C	94	AF=0.667	0/1/1	0|1	3	0.221011	0.00149568	ADAMTSL4
1	150526406	C	268	T	354	AF=0.667	0/1/1	0|1	3	0.000642355	3.8145e-07	ADAMTSL4
1	150534368	T	3	C	25	AF=0.667	0/1/1	0|1	3	2.74405e-05	0.00882479	None
1	150541812	C	1	T	17	AF=0.667	0/1/1	0|1	3	0.000144958	0.010701	None
1	150547747	G	779	A	2009	AF=0.667	0/1/1	0|1	3	5.62532e-124	1.24005e-09	MCL1
1	150551295	T	134	C	41	AF=0.333	0/0/1	1|0	3	1.0058e-12	0.00494714	MCL1
1	150583670	G	1	C	23	AF=0.667	0/1/1	0|1	3	2.98023e-06	0.00162936	None
1	150596365	A	95	G	95	AF=0.667	0/1/1	0|1	3	1	2.16165e-06	ENSA
1	150602413	G	5	A	30	AF=0.667	0/1/1	0|1	3	2.23615e-05	0.0184324	None
1	150608300	A	0	G	14	AF=0.667	0/1/1	0|1	3	0.00012207	0.00745572	None
1	150618961	T	93	G	49	AF=0.667	0/1/1	0|1	3	0.000278178	6.36472e-15	GOLPH3L
1	150738759	T	0	C	10	AF=0.333	0/0/1	1|0	3	0.00195312	1.67665e-05	None
1	150808889	C	92	G	30	AF=0.333	0/0/1	1|0	3	1.64672e-08	0.0435052	ARNT
1	150814174	A	4	G	15	AF=0.333	0/0/1	1|0	3	0.0192108	5.98543e-05	ARNT
1	150915875	G	17	A	19	AF=0.333	0/0/1	1|0	3	0.867939	0.0200101	SETDB1
1	150923099	T	41	C	35	AF=0.333	0/0/1	1|0	3	0.566573	0.0207533	SETDB1
1	150937594	T	9	C	18	AF=0.333	0/0/1	1|0	3	0.122078	0.000659675	None
1	150937661	A	18	G	23	AF=0.333	0/0/1	1|0	3	0.532709	0.00414043	CERS2
1	150940625	T	293	G	373	AF=0.667	0/1/1	0|1	3	0.002181	9.70997e-09	CERS2
1	151002880	C	0	G	12	AF=0.667	0/1/1	0|1	3	0.000488281	0.0115796	PRUNE
1	151007574	G	37	C	112	AF=0.667	0/1/1	0|1	3	5.79405e-10	0.0295686	PRUNE
1	151008911	C	6	T	14	AF=0.333	0/0/1	1|0	3	0.115318	0.00117265	None
1	151008914	T	14	A	6	AF=0.667	0/1/1	0|1	3	0.115318	0.00117265	None
1	151025777	A	195	G	478	AF=0.667	0/1/1	0|1	3	2.47884e-28	0.0176383	CDC42SE1
1	151040435	G	467	A	169	AF=0.333	0/0/1	1|0	3	3.22198e-33	0.000289907	MLLT11
1	151042229	G	0	A	11	AF=0.667	0/1/1	0|1	3	0.000976562	0.0203885	None
1	151097367	C	9	T	24	AF=0.333	0/0/1	1|0	3	0.013531	5.79054e-06	None
1	151101396	T	0	C	15	AF=0.667	0/1/1	0|1	3	6.10352e-05	0.00409135	None
1	151344741	T	0	G	14	AF=0.667	0/1/1	0|1	3	0.00012207	0.00745572	SELENBP1
1	151407693	A	0	G	18	AF=0.333	0/0/1	1|0	3	7.62939e-06	2.53511e-09	POGZ
1	151417202	A	4	C	15	AF=0.333	0/0/1	1|0	3	0.0192108	5.98543e-05	POGZ
1	151423038	A	0	C	10	AF=0.667	0/1/1	0|1	3	0.00195312	0.0369765	POGZ
1	151424971	T	1	C	13	AF=0.333	0/0/1	1|0	3	0.00183105	5.98751e-06	POGZ
1	151427666	T	0	C	18	AF=0.667	0/1/1	0|1	3	7.62939e-06	0.000825895	POGZ
1	151512895	A	1	G	14	AF=0.667	0/1/1	0|1	3	0.000976562	0.0279688	TUFT1
1	151514603	G	0	A	10	AF=0.667	0/1/1	0|1	3	0.00195312	0.0369765	TUFT1
1	151647007	T	0	C	13	AF=0.667	0/1/1	0|1	3	0.000244141	0.00680515	SNX27
1	151735007	G	17	A	9	AF=0.667	0/1/1	0|1	3	0.168638	0.00118986	MRPL9
1	151845650	G	1	C	29	AF=0.667	0/1/1	0|1	3	5.7742e-08	0.000128172	THEM4
1	151846413	G	6	C	94	AF=0.667	0/1/1	0|1	3	2.00596e-21	7.90208e-11	THEM4
1	151847126	T	120	C	311	AF=0.667	0/1/1	0|1	3	1.28049e-20	0.0162515	THEM4
1	151859050	G	0	A	10	AF=0.667	0/1/1	0|1	3	0.00195312	0.0369765	THEM4
1	151862661	G	51	A	153	AF=0.667	0/1/1	0|1	3	4.92569e-13	0.0114657	THEM4
1	151865780	G	1	A	14	AF=0.667	0/1/1	0|1	3	0.000976562	0.0279688	THEM4
1	151879676	G	2279	T	953	AF=0.333	0/0/1	1|0	3	1.0729e-123	3.64523e-06	THEM4
1	151879761	G	3301	A	1323	AF=0.333	0/0/1	1|0	3	6.97617e-192	7.94329e-12	THEM4
1	151879939	C	1731	T	592	AF=0.333	0/0/1	1|0	3	1.24144e-128	3.23094e-16	THEM4
1	153587256	A	0	T	11	AF=0.333	0/0/1	1|0	3	0.000976562	5.58324e-06	S100A14
1	153594364	G	6	T	14	AF=0.333	0/0/1	1|0	3	0.115318	0.00117265	S100A13
1	153721605	G	0	A	13	AF=0.333	0/0/1	0|1	3	0.000244141	6.1912e-07	INTS3
1	153777848	C	20	T	14	AF=0.667	0/1/1	1|0	3	0.391528	0.00292153	GATAD2B
1	153779412	A	64	G	59	AF=0.667	0/1/1	1|0	3	0.718509	2.06621e-05	GATAD2B
1	153780298	C	14	T	85	AF=0.667	0/1/1	1|0	3	1.42799e-13	2.39912e-05	GATAD2B
1	153856498	C	23	T	6	AF=0.667	0/1/1	1|0	3	0.0023157	4.94238e-07	GATAD2B
1	153906397	A	27	G	32	AF=0.333	0/0/1	0|1	3	0.602923	0.00125075	DENND4B
1	153907839	T	33	C	7	AF=0.333	0/0/1	0|1	3	4.2277e-05	0.0425263	DENND4B
1	153908309	G	23	A	44	AF=0.333	0/0/1	0|1	3	0.0139339	7.27466e-08	DENND4B
1	153909069	G	115	C	129	AF=0.333	0/0/1	0|1	3	0.405324	3.67578e-10	DENND4B
1	153920564	A	52	G	9	AF=0.333	0/0/1	0|1	3	1.8028e-08	0.00157727	CRTC2
1	153931835	G	211	T	351	AF=0.667	0/1/1	1|0	3	3.79148e-09	0.035354	SLC39A1
1	153932212	G	257	C	97	AF=0.333	0/0/1	0|1	3	7.81955e-18	0.017883	SLC39A1
1	153941514	C	65	T	85	AF=0.333	0/0/1	0|1	3	0.120529	5.37877e-09	CREB3L4
1	153942593	C	0	T	10	AF=0.667	0/1/1	1|0	3	0.00195312	0.0369765	CREB3L4
1	154948327	G	41	T	13	AF=0.667	0/1/1	0|1	3	0.000175127	1.77828e-10	CKS1B
1	154977929	A	0	G	14	AF=0.667	0/1/1	0|1	3	0.00012207	0.00745572	ZBTB7B
1	154988957	A	128	G	32	AF=0.333	0/0/1	1|0	3	8.42197e-15	0.000281322	ZBTB7B
1	154989595	T	126	C	31	AF=0.333	0/0/1	1|0	3	8.67427e-15	0.000244679	ZBTB7B
1	155026871	G	222	T	57	AF=0.333	0/0/1	1|0	3	3.63946e-24	3.02222e-06	ADAM15, LOC100505666
1	155027904	G	3	A	9	AF=0.333	0/0/1	1|0	3	0.145996	0.00382585	ADAM15, LOC100505666
1	155028774	T	0	G	21	AF=0.667	0/1/1	0|1	3	9.53674e-07	0.000274119	ADAM15, LOC100505666
1	155030557	A	86	C	69	AF=0.333	0/0/1	1|0	3	0.198584	0.00369071	ADAM15, LOC100505666
1	155143768	G	11	T	3	AF=0.667	0/1/1	0|1	3	0.057373	0.000684325	KRTCAP2
1	155230131	C	224	T	592	AF=0.667	0/1/1	0|1	3	4.26647e-39	0.00035729	SCAMP3
1	155231545	T	0	G	11	AF=0.667	0/1/1	0|1	3	0.000976562	0.0203885	SCAMP3
1	155232074	C	92	T	244	AF=0.667	0/1/1	0|1	3	5.05387e-17	0.0206347	SCAMP3
1	155237639	C	0	T	10	AF=0.667	0/1/1	0|1	3	0.00195312	0.0369765	CLK2
1	155241103	A	0	G	18	AF=0.667	0/1/1	0|1	3	7.62939e-06	0.000825895	CLK2
1	155241361	G	1	A	34	AF=0.667	0/1/1	0|1	3	2.09548e-09	1.74378e-05	CLK2
1	155252833	G	0	A	21	AF=0.667	0/1/1	0|1	3	9.53674e-07	0.000274119	HCN3
1	155253583	G	5	A	29	AF=0.667	0/1/1	0|1	3	3.85582e-05	0.027163	HCN3
1	155255837	T	12	C	6	AF=0.667	0/1/1	0|1	3	0.237885	0.00456538	HCN3
1	155259323	C	172	T	192	AF=0.667	0/1/1	0|1	3	0.319314	4.05257e-08	HCN3, PKLR
1	155260096	G	84	A	255	AF=0.667	0/1/1	0|1	3	3.57776e-21	0.000804626	PKLR
1	155260350	A	89	G	266	AF=0.667	0/1/1	0|1	3	1.30371e-21	0.000872011	PKLR
1	155260401	C	255	T	160	AF=0.333	0/0/1	0/1	3	3.59643e-06	0.0250608	PKLR
1	155262613	C	0	G	12	AF=0.667	0/1/1	0|1	3	0.000488281	0.0115796	PKLR
1	155279482	T	0	G	65	AF=0.667	0/1/1	0|1	3	5.42101e-20	4.43903e-12	FDPS
1	155282829	A	30	G	33	AF=0.667	0/1/1	0|1	3	0.801306	0.0221786	FDPS
1	155284586	T	61	A	35	AF=0.667	0/1/1	0|1	3	0.0103459	1.56775e-09	FDPS
1	155285854	T	15	C	78	AF=0.667	0/1/1	0|1	3	1.93931e-11	0.000252107	FDPS
1	155289545	T	14	G	57	AF=0.667	0/1/1	0|1	3	2.66592e-07	0.0161423	FDPS, RUSC1-AS1
1	155364327	T	0	C	15	AF=0.667	0/1/1	0|1	3	6.10352e-05	0.00409135	ASH1L
1	155439062	T	2	C	34	AF=0.667	0/1/1	0|1	3	1.94123e-08	0.000125701	ASH1L
1	155445842	T	4	G	33	AF=0.667	0/1/1	0|1	3	1.08439e-06	0.00260934	ASH1L
1	155508882	G	2	A	11	AF=0.333	0/0/1	1|0	3	0.0224609	0.000210486	ASH1L
1	155538579	A	21	G	80	AF=0.667	0/1/1	0|1	3	2.72664e-09	0.00795936	None
1	155629483	C	199	G	55	AF=0.333	0/0/1	1|0	3	2.49315e-20	5.93145e-05	YY1AP1
1	155633307	T	0	C	14	AF=0.667	0/1/1	0|1	3	0.00012207	0.00745572	YY1AP1
1	155652081	T	1	A	24	AF=0.667	0/1/1	0|1	3	1.54972e-06	0.000950131	YY1AP1
1	155652398	T	18	C	5	AF=0.667	0/1/1	0|1	3	0.010622	1.28999e-05	YY1AP1
1	155658940	T	1020	G	2215	AF=0.667	0/1/1	0|1	3	3.83289e-100	0.0334499	DAP3, YY1AP1
1	155668700	G	0	A	11	AF=0.667	0/1/1	0|1	3	0.000976562	0.0203885	DAP3, YY1AP1
1	155698425	C	0	T	37	AF=0.667	0/1/1	0|1	3	1.45519e-11	4.73703e-07	DAP3, YY1AP1
1	155702111	T	30	C	106	AF=0.667	0/1/1	0|1	3	3.81606e-11	0.0047183	DAP3, YY1AP1
1	155735012	T	28	C	103	AF=0.667	0/1/1	0|1	3	2.80458e-11	0.00386355	GON4L, YY1AP1
1	155754448	C	0	T	16	AF=0.667	0/1/1	0|1	3	3.05176e-05	0.00231905	GON4L, YY1AP1
1	155761508	A	0	G	12	AF=0.667	0/1/1	0|1	3	0.000488281	0.0115796	GON4L
1	155880391	T	3	C	31	AF=0.667	0/1/1	0|1	3	7.66013e-07	0.00157171	RIT1
1	155903408	C	6	T	25	AF=0.333	0/0/1	1|0	3	0.00087791	8.40812e-08	KIAA0907
1	155929673	C	0	A	20	AF=0.667	0/1/1	0|1	3	1.90735e-06	0.000468994	ARHGEF2
1	155929701	G	0	A	13	AF=0.667	0/1/1	0|1	3	0.000244141	0.00680515	ARHGEF2
1	155935244	C	23	A	9	AF=0.667	0/1/1	0|1	3	0.0200616	1.16493e-05	ARHGEF2
1	155947875	A	6	G	10	AF=0.333	0/0/1	1|0	3	0.454498	0.0173614	ARHGEF2
1	155948645	G	3	C	8	AF=0.333	0/0/1	1|0	3	0.226562	0.00876373	ARHGEF2
1	155952328	C	0	T	70	AF=0.667	0/1/1	0|1	3	1.69407e-21	9.55369e-13	ARHGEF2
1	155959303	G	0	A	11	AF=0.667	0/1/1	0|1	3	0.000976562	0.0203885	ARHGEF2
1	156107534	C	182	T	264	AF=0.667	0/1/1	0|1	3	0.000120353	0.000903173	LMNA
1	156180349	T	52	A	53	AF=0.333	0/0/1	1|0	3	1	0.000373135	SLC25A44
1	156181530	A	90	G	28	AF=0.333	0/0/1	1|0	3	8.91405e-09	0.0311571	SLC25A44
1	156188214	A	5	G	20	AF=0.333	0/0/1	1|0	3	0.00407732	2.22886e-06	PMF1, PMF1-BGLAP
1	156195888	C	1	T	13	AF=0.333	0/0/1	1|0	3	0.00183105	5.98751e-06	PMF1, PMF1-BGLAP
1	156196016	T	6	C	13	AF=0.333	0/0/1	1|0	3	0.167068	0.00231089	PMF1, PMF1-BGLAP
1	156208230	A	1	G	16	AF=0.667	0/1/1	0|1	3	0.000274658	0.0176523	PMF1, PMF1-BGLAP
1	156211825	T	4	C	26	AF=0.333	0/0/1	1|0	3	5.94761e-05	2.24143e-09	PMF1-BGLAP
1	156219450	A	101	G	153	AF=0.667	0/1/1	0|1	3	0.00132796	0.0329441	SMG5
1	156230141	T	0	A	10	AF=0.667	0/1/1	0|1	3	0.00195312	0.0369765	SMG5
1	156230206	C	0	A	10	AF=0.667	0/1/1	0|1	3	0.00195312	0.0369765	SMG5
1	156233479	T	0	C	15	AF=0.667	0/1/1	0|1	3	6.10352e-05	0.00409135	SMG5
1	156240835	A	0	C	10	AF=0.667	0/1/1	0|1	3	0.00195312	0.0369765	SMG5
1	156249505	A	2	G	28	AF=0.667	0/1/1	0|1	3	8.67993e-07	0.00138545	SMG5
1	156260644	T	3	A	7	AF=0.333	0/0/1	0|1	3	0.34375	0.0195481	AF086351, TMEM79
1	156282224	A	0	G	36	AF=0.667	0/1/1	0|1	3	2.91038e-11	8.38364e-07	CCT3
1	156282649	A	8	G	5	AF=0.667	0/1/1	0|1	3	0.581055	0.0396204	CCT3
1	156303631	G	0	A	30	AF=0.667	0/1/1	0|1	3	1.86265e-09	6.7397e-06	CCT3
1	156305162	C	6	T	30	AF=0.667	0/1/1	0|1	3	6.96017e-05	0.0340701	CCT3
1	156504104	A	8	C	47	AF=0.667	0/1/1	0|1	3	8.06761e-08	0.00240465	IQGAP3
1	156504728	G	0	A	17	AF=0.667	0/1/1	0|1	3	1.52588e-05	0.00136129	IQGAP3
1	156518379	G	19	A	16	AF=0.667	0/1/1	0|1	3	0.735879	0.0113954	IQGAP3
1	156538730	T	0	C	10	AF=0.667	0/1/1	0|1	3	0.00195312	0.0369765	IQGAP3
1	156564640	G	313	A	233	AF=0.333	0/0/1	1|0	3	0.000708391	5.26621e-06	APOA1BP, GPATCH4
1	156564922	C	418	T	246	AF=0.333	0/0/1	1|0	3	2.50938e-11	0.0435689	APOA1BP, GPATCH4
1	156565834	G	0	C	35	AF=0.667	0/1/1	0|1	3	5.82077e-11	8.356e-07	APOA1BP, GPATCH4
1	156566491	A	4	G	26	AF=0.667	0/1/1	0|1	3	5.94761e-05	0.0194886	APOA1BP, GPATCH4
1	156567496	C	30	T	6	AF=0.333	0/0/1	1|0	3	6.96017e-05	0.0340701	GPATCH4
1	156594656	C	28	A	50	AF=0.333	0/0/1	1|0	3	0.0168531	4.07547e-08	HAPLN2
1	156611840	C	4	T	10	AF=0.333	0/0/1	0/1	3	0.179565	0.00400617	BC005081, BCAN
1	156615114	A	154	G	117	AF=0.667	0/1/1	0|1	3	0.0285676	2.75214e-15	BCAN
1	156617968	G	10	A	4	AF=0.667	0/1/1	0|1	3	0.179565	0.00400617	BCAN
1	156622252	G	3	A	28	AF=0.667	0/1/1	0|1	3	4.64916e-06	0.00373555	BCAN
1	156624238	G	9	A	4	AF=0.667	0/1/1	0|1	3	0.266846	0.0139305	BCAN
1	156625572	T	15	C	9	AF=0.667	0/1/1	0|1	3	0.307456	0.00397488	BCAN
1	156686005	A	2	C	20	AF=0.333	0/0/1	1|0	3	0.000121117	3.02949e-08	None
1	156693018	C	50	G	143	AF=0.667	0/1/1	0|1	3	1.41613e-11	0.0321997	ISG20L2
1	156709621	T	1	A	27	AF=0.667	0/1/1	0|1	3	2.16067e-07	0.000372518	MRPL24
1	156776717	T	29	C	38	AF=0.333	0/0/1	1|0	3	0.328432	0.000125309	SH2D2A
1	156777845	G	10	T	22	AF=0.333	0/0/1	1|0	3	0.0501025	4.66981e-05	SH2D2A
1	156786574	T	26	A	30	AF=0.667	0/1/1	0|1	3	0.68888	0.0462668	NTRK1, SH2D2A
1	156841073	G	2	A	21	AF=0.667	0/1/1	0|1	3	6.60419e-05	0.0129398	NTRK1
1	156846233	G	47	A	68	AF=0.333	0/0/1	1|0	3	0.0617086	1.50254e-08	NTRK1
1	156879532	C	0	T	10	AF=0.333	0/0/1	1|0	3	0.00195312	1.67665e-05	PEAR1
1	156879580	C	0	T	10	AF=0.333	0/0/1	1|0	3	0.00195312	1.67665e-05	PEAR1
1	156904644	A	30	G	5	AF=0.333	0/0/1	1|0	3	2.23615e-05	0.0184324	ARHGEF11
1	156907081	T	16	C	25	AF=0.333	0/0/1	1|0	3	0.211024	0.000354031	ARHGEF11
1	156908986	T	5	C	32	AF=0.333	0/0/1	1|0	3	7.42753e-06	3.24912e-11	ARHGEF11
1	156909695	G	20	A	25	AF=0.333	0/0/1	1|0	3	0.551484	0.00234954	ARHGEF11
1	157247314	G	0	A	17	AF=0.333	0/0/1	1|0	3	1.52588e-05	7.61293e-09	None
1	157247446	T	0	C	19	AF=0.333	0/0/1	1|0	3	3.8147e-06	8.4419e-10	None
1	157252748	T	37	C	12	AF=0.667	0/1/1	0|1	3	0.000469757	1.81113e-09	None
1	158580887	T	206	C	108	AF=0.667	0/1/1	0|1	3	3.436e-08	1.81116e-31	SPTA1
1	158582543	G	28	A	33	AF=0.333	0/0/1	1|0	3	0.608921	0.00095262	SPTA1
1	158582552	G	25	A	36	AF=0.333	0/0/1	1|0	3	0.200031	5.39197e-05	SPTA1
1	158584410	G	25	A	20	AF=0.667	0/1/1	0|1	3	0.551484	0.00234954	SPTA1
1	158587143	C	26	T	4	AF=0.333	0/0/1	1|0	3	5.94761e-05	0.0194886	SPTA1
1	158587858	G	16	A	7	AF=0.667	0/1/1	0|1	3	0.0931396	0.000499885	SPTA1
1	158588146	G	1	A	41	AF=0.667	0/1/1	0|1	3	1.95541e-11	1.39971e-06	SPTA1
1	158588163	C	1	A	44	AF=0.667	0/1/1	0|1	3	2.6148e-12	5.3006e-07	SPTA1
1	158588206	T	0	C	49	AF=0.667	0/1/1	0|1	3	3.55271e-15	4.22195e-09	SPTA1
1	158592455	G	56	T	48	AF=0.667	0/1/1	0|1	3	0.492645	2.36659e-05	SPTA1
1	158592935	G	131	A	74	AF=0.667	0/1/1	0|1	3	8.33432e-05	4.61703e-19	SPTA1
1	158597507	G	162	C	208	AF=0.667	0/1/1	0|1	3	0.0191906	3.27027e-05	SPTA1
1	158608178	G	0	A	11	AF=0.667	0/1/1	0|1	3	0.000976562	0.0203885	SPTA1
1	158608475	G	2	A	13	AF=0.333	0/0/1	0|1	3	0.00738525	3.10525e-05	SPTA1
1	158609300	C	1	G	21	AF=0.667	0/1/1	0|1	3	1.09673e-05	0.00248782	SPTA1
1	158626378	C	91	T	78	AF=0.333	0/0/1	1|0	3	0.356004	0.000570319	SPTA1
1	159994898	G	0	A	22	AF=0.667	0/1/1	0|1	3	4.76837e-07	0.000165688	None
1	159995809	G	4	A	26	AF=0.667	0/1/1	0|1	3	5.94761e-05	0.0194886	None
1	160000435	A	18	T	65	AF=0.667	0/1/1	0|1	3	2.10545e-07	0.0264475	PIGM
1	160185534	G	27	A	27	AF=0.333	0/0/1	1|0	3	1	0.0132967	DCAF8
1	160217493	C	0	T	21	AF=0.667	0/1/1	0|1	3	9.53674e-07	0.000274119	DCAF8
1	160224700	T	0	A	12	AF=0.667	0/1/1	0|1	3	0.000488281	0.0115796	DCAF8
1	160246485	C	0	T	17	AF=0.667	0/1/1	0|1	3	1.52588e-05	0.00136129	DCAF8
1	160246704	C	30	T	5	AF=0.333	0/0/1	1|0	3	2.23615e-05	0.0184324	DCAF8, PEX19
1	160247185	G	89	C	236	AF=0.667	0/1/1	0|1	3	1.67046e-16	0.0251748	DCAF8, PEX19
1	160252237	A	189	G	225	AF=0.333	0/0/1	1|0	3	0.0852807	2.07566e-18	DCAF8, PEX19
1	160258398	T	9	C	18	AF=0.333	0/0/1	1|0	3	0.122078	0.000659675	COPA
1	160258642	T	9	A	21	AF=0.333	0/0/1	1|0	3	0.0427739	4.88829e-05	COPA
1	160260233	T	0	C	24	AF=0.667	0/1/1	0|1	3	1.19209e-07	9.55543e-05	COPA
1	160266667	C	0	G	15	AF=0.667	0/1/1	0|1	3	6.10352e-05	0.00409135	COPA
1	160302983	G	2	A	24	AF=0.667	0/1/1	0|1	3	1.04904e-05	0.00547295	COPA
1	160303416	G	168	A	482	AF=0.667	0/1/1	0|1	3	4.81061e-36	4.38555e-05	COPA
1	160309450	G	0	C	19	AF=0.667	0/1/1	0|1	3	3.8147e-06	0.000831737	COPA
1	160321656	G	8	A	13	AF=0.333	0/0/1	1|0	3	0.38331	0.00906972	NCSTN
1	160341142	T	0	C	21	AF=0.667	0/1/1	0|1	3	9.53674e-07	0.000274119	NHLH1
1	160388141	C	8	T	15	AF=0.333	0/0/1	1|0	3	0.21004	0.00285358	VANGL2
1	160454943	C	0	T	27	AF=0.667	0/1/1	0|1	3	1.49012e-08	3.53136e-05	SLAMF6
1	160507016	T	0	C	18	AF=0.667	0/1/1	0|1	3	7.62939e-06	0.000825895	None
1	160512224	G	0	A	16	AF=0.667	0/1/1	0|1	3	3.05176e-05	0.00231905	CD84
1	160513626	G	0	A	28	AF=0.667	0/1/1	0|1	3	7.45058e-09	1.95933e-05	CD84
1	160516049	A	3	G	20	AF=0.667	0/1/1	0|1	3	0.000488281	0.0451487	CD84
1	161476533	T	12	C	7	AF=0.667	0/1/1	1|0	3	0.359283	0.0121329	FCGR2A
1	161477028	T	1	C	10	AF=0.333	0/0/1	0/1	3	0.0117188	0.000128599	FCGR2A
1	161479599	G	12	A	6	AF=0.667	0/1/1	1|0	3	0.237885	0.00456538	FCGR2A
1	161480649	A	269	G	777	AF=0.667	0/1/1	1|0	3	1.06514e-57	1.20281e-07	FCGR2A
1	161481561	C	7	T	18	AF=0.333	0/0/1	0|1	3	0.0432853	0.000127067	FCGR2A
1	161647533	A	25	G	35	AF=0.333	0/0/1	1|0	3	0.245061	8.79534e-05	FCGR2B
1	161718740	C	18	G	14	AF=0.667	0/1/1	0|1	3	0.596615	0.00810101	None
1	161721351	A	11	G	7	AF=0.667	0/1/1	0|1	3	0.480682	0.0211367	DUSP12
1	161721707	C	232	T	392	AF=0.667	0/1/1	0|1	3	1.5589e-10	0.0414734	DUSP12
1	161722272	C	0	A	13	AF=0.333	0/0/1	1|0	3	0.000244141	6.1912e-07	DUSP12
1	162531494	C	261	T	66	AF=0.25	0/0/0/1	1|0	4	1.42204e-28	0.0475213	UAP1
1	162563661	C	0	T	36	AF=0.75	0/1/1/1	0|1	4	2.91038e-11	5.3494e-05	UAP1
1	163205346	T	0	G	10	AF=0.25	0/0/0/1	1|0	4	0.00195312	9.53674e-07	RGS5
1	163207399	C	0	A	16	AF=0.75	0/1/1/1	0|1	4	3.05176e-05	0.0174923	RGS5
1	163207501	G	0	T	15	AF=0.75	0/1/1/1	0|1	4	6.10352e-05	0.0306633	RGS5
1	163215128	C	24	T	37	AF=0.75	0/1/1/1	0|1	4	0.123731	0.016845	RGS5
1	163231680	T	0	A	22	AF=0.25	0/0/0/1	1|0	4	4.76837e-07	5.68434e-14	RGS5
1	163269037	T	15	C	10	AF=0.75	0/1/1/1	0|1	4	0.424356	0.000214512	RGS5
1	163278839	A	0	T	12	AF=0.75	0/1/1/1	0|1	4	0.000488281	0.0459291	RGS5
1	163279188	C	0	T	22	AF=0.75	0/1/1/1	0|1	4	4.76837e-07	0.0024843	RGS5
1	163279431	C	0	T	21	AF=0.75	0/1/1/1	0|1	4	9.53674e-07	0.00406549	RGS5
1	163279979	C	27	T	16	AF=0.75	0/1/1/1	0|1	4	0.126289	1.8136e-07	RGS5
1	163280158	C	29	T	20	AF=0.75	0/1/1/1	0|1	4	0.25287	3.97568e-07	RGS5
1	163284768	C	0	A	28	AF=0.75	0/1/1/1	0|1	4	7.45058e-09	0.000607603	RGS5
1	163288544	A	0	G	21	AF=0.75	0/1/1/1	0|1	4	9.53674e-07	0.00406549	RGS5
1	163306236	T	6	G	12	AF=0.25	0/0/0/1	1|0	4	0.237885	0.000231179	NUF2
1	163315350	G	4	C	10	AF=0.25	0/0/0/1	1|0	4	0.179565	0.000341874	NUF2
1	163317182	C	0	G	12	AF=0.75	0/1/1/1	0|1	4	0.000488281	0.0459291	NUF2
1	165600267	T	0	A	51	AF=0.75	0/1/1/1	0|1	4	8.88178e-16	7.27862e-07	MGST3
1	165620602	G	9	C	6	AF=0.75	0/1/1/1	0|1	4	0.607239	0.00419301	MGST3
1	165620792	G	6	A	15	AF=0.25	0/0/0/1	1|0	4	0.0783539	1.02377e-05	MGST3
1	165624799	G	342	T	293	AF=0.25	0/0/0/1	1|0	4	0.0567177	1.0151e-30	MGST3
1	165630372	T	0	G	10	AF=0.25	0/0/0/1	1|0	4	0.00195312	9.53674e-07	None
1	165630475	C	0	T	11	AF=0.25	0/0/0/1	1|0	4	0.000976562	2.38419e-07	None
1	165630495	T	0	C	10	AF=0.25	0/0/0/1	1|0	4	0.00195312	9.53674e-07	None
1	165637541	T	0	C	10	AF=0.25	0/0/0/1	1|0	4	0.00195312	9.53674e-07	ALDH9A1
1	165667781	T	34	G	7	AF=0.75	0/1/1/1	0|1	4	2.53208e-05	1.0885e-14	ALDH9A1
1	165694918	G	3	C	27	AF=0.25	0/0/0/1	1|0	4	8.43033e-06	9.85548e-14	TMCO1
1	165871268	C	10	G	4	AF=0.75	0/1/1/1	0|1	4	0.179565	0.000341874	UCK2
1	165878498	C	111	T	209	AF=0.75	0/1/1/1	0|1	4	4.65603e-08	0.000129813	UCK2
1	166451443	T	0	C	35	AF=0.25	0/0/0/1	1|0	4	5.82077e-11	8.47033e-22	None
1	167389821	A	15	G	22	AF=0.75	0/1/1/1	0|1	4	0.324009	0.0361617	POU2F1
1	167392702	A	60	G	124	AF=0.75	0/1/1/1	0|1	4	2.73684e-06	0.0212043	POU2F1
1	167393128	T	84	C	42	AF=0.25	0/0/0/1	1|0	4	0.000229978	0.0389659	POU2F1
1	167393635	G	72	A	83	AF=0.75	0/1/1/1	0|1	4	0.421939	7.54973e-09	POU2F1
1	167511595	A	14	T	9	AF=0.75	0/1/1/1	0|1	4	0.404873	0.000283086	CREG1
1	167512098	C	17	T	23	AF=0.75	0/1/1/1	0|1	4	0.429591	0.016257	CREG1
1	167512205	G	30	C	8	AF=0.75	0/1/1/1	0|1	4	0.000471987	4.64011e-12	CREG1
1	167512227	A	24	G	12	AF=0.75	0/1/1/1	0|1	4	0.0652453	1.67015e-07	CREG1
1	167512884	G	35	A	31	AF=0.75	0/1/1/1	0|1	4	0.712231	1.14111e-06	CREG1
1	167513648	G	2	C	43	AF=0.75	0/1/1/1	0|1	4	5.88898e-11	0.000448836	CREG1
1	167514533	C	25	T	22	AF=0.75	0/1/1/1	0|1	4	0.770867	5.47428e-05	CREG1
1	167516862	G	0	C	15	AF=0.75	0/1/1/1	0|1	4	6.10352e-05	0.0306633	CREG1
1	167523004	G	0	A	20	AF=0.75	0/1/1/1	0|1	4	1.90735e-06	0.00711335	CREG1
1	167602304	A	21	C	16	AF=0.25	0/0/0/1	1|0	4	0.511376	0.0206049	RCSD1
1	167602641	G	172	A	38	AF=0.25	0/0/0/1	1|0	4	1.47275e-21	0.0206443	RCSD1
1	167603062	C	80	G	14	AF=0.25	0/0/0/1	1|0	4	2.12012e-12	0.0232217	RCSD1
1	167603963	G	4	A	7	AF=0.25	0/0/0/1	1|0	4	0.548828	0.00756121	RCSD1
1	167608109	A	54	G	36	AF=0.25	0/0/0/1	1|0	4	0.0725495	0.00208571	RCSD1
1	167611826	T	16	C	13	AF=0.25	0/0/0/1	1|0	4	0.711071	0.0183205	RCSD1
1	167612162	C	33	T	32	AF=0.25	0/0/0/1	1|0	4	1	3.59876e-05	RCSD1
1	167632618	G	0	A	15	AF=0.75	0/1/1/1	0|1	4	6.10352e-05	0.0306633	RCSD1
1	167632688	C	0	T	15	AF=0.75	0/1/1/1	0|1	4	6.10352e-05	0.0306633	RCSD1
1	167634067	A	2	G	59	AF=0.75	0/1/1/1	0|1	4	1.64105e-15	9.31745e-06	RCSD1
1	167667620	C	1	T	9	AF=0.25	0/0/0/1	1|0	4	0.0214844	2.95639e-05	RCSD1
1	167675535	A	31	G	25	AF=0.25	0/0/0/1	1|0	4	0.504404	0.00165307	None
1	167675649	T	65	C	35	AF=0.25	0/0/0/1	1|0	4	0.00351764	0.02751	None
1	167676364	C	14	A	22	AF=0.25	0/0/0/1	1|0	4	0.242985	4.79218e-06	None
1	167744977	G	4	T	18	AF=0.25	0/0/0/1	1|0	4	0.00434351	3.61661e-08	MPZL1
1	167855935	A	0	C	18	AF=0.75	0/1/1/1	0|1	4	7.62939e-06	0.0110595	ADCY10
1	167859843	A	0	G	14	AF=0.75	0/1/1/1	0|1	4	0.00012207	0.0281275	ADCY10
1	168014204	T	53	A	272	AF=0.75	0/1/1/1	0|1	4	1.28505e-36	0.000192826	DCAF6
1	168181828	C	2	T	66	AF=0.75	0/1/1/1	0|1	4	1.59039e-17	1.63447e-06	None
1	168185727	A	3	T	48	AF=0.75	0/1/1/1	0|1	4	1.96749e-11	0.000578864	None
1	168185939	T	0	G	56	AF=0.75	0/1/1/1	0|1	4	2.77556e-17	1.74524e-07	None
1	168186066	G	0	A	33	AF=0.75	0/1/1/1	0|1	4	2.32831e-10	0.000143906	None
1	168186914	A	0	G	20	AF=0.75	0/1/1/1	0|1	4	1.90735e-06	0.00711335	None
1	168188485	G	1	C	87	AF=0.75	0/1/1/1	0|1	4	5.75149e-25	5.24893e-10	None
1	168212234	G	165	A	34	AF=0.25	0/0/0/1	1|0	4	7.69109e-22	0.00872464	TBX19
1	168215505	A	45	G	26	AF=0.25	0/0/0/1	1|0	4	0.0319272	0.0281394	ANKRD36BP1, TBX19
1	168218504	T	144	C	97	AF=0.25	0/0/0/1	1|0	4	0.00296642	2.11357e-07	DQ576756, TBX19
1	168221225	A	157	C	30	AF=0.25	0/0/0/1	1|0	4	5.78797e-22	0.00396789	TBX19
1	168223264	T	3	A	14	AF=0.25	0/0/0/1	1|0	4	0.0127258	1.14297e-06	TBX19
1	168223389	A	0	G	11	AF=0.25	0/0/0/1	1|0	4	0.000976562	2.38419e-07	TBX19
1	168254692	T	0	C	13	AF=0.75	0/1/1/1	0|1	4	0.000244141	0.0480474	TBX19
1	169088388	G	0	A	16	AF=0.25	0/0/0/1	1|0	4	3.05176e-05	2.32831e-10	ATP1B1
1	169249416	C	0	T	12	AF=0.25	0/0/0/1	1|0	4	0.000488281	5.96046e-08	NME7
1	169455982	C	5	A	16	AF=0.25	0/0/0/1	1|0	4	0.0266037	1.24316e-06	None
1	169456046	A	12	G	23	AF=0.25	0/0/0/1	1|0	4	0.0895311	4.48735e-07	None
1	169642676	C	0	T	13	AF=0.75	0/1/1/1	0|1	4	0.000244141	0.0480474	C1orf112
1	169765052	C	1	G	22	AF=0.75	0/1/1/1	0|1	4	5.72205e-06	0.0264528	C1orf112
1	169767626	G	1	A	11	AF=0.25	0/0/0/1	1|0	4	0.00634766	2.20537e-06	C1orf112
1	169786478	C	1	G	9	AF=0.25	0/0/0/1	1|0	4	0.0214844	2.95639e-05	C1orf112
1	169823660	C	10	T	100	AF=0.75	0/1/1/1	0|1	4	8.00952e-20	3.57094e-05	SCYL3
1	169829071	G	11	A	8	AF=0.75	0/1/1/1	0|1	4	0.647606	0.00228843	Metazoa_SRP, SCYL3
1	169838278	G	0	A	12	AF=0.75	0/1/1/1	0|1	4	0.000488281	0.0459291	SCYL3
1	169840643	G	12	A	18	AF=0.25	0/0/0/1	1|0	4	0.361595	5.00833e-05	SCYL3
1	170503928	G	22	A	21	AF=0.25	0/0/0/1	1|0	4	1	0.00111891	GORAB
1	171454777	C	372	T	96	AF=0.25	0/0/0/1	0|1	4	2.19698e-39	0.0248973	PRRC2C
1	171459507	A	9	G	8	AF=0.25	0/0/0/1	0|1	4	1	0.0477537	PRRC2C
1	171470374	T	4	G	7	AF=0.25	0/0/0/1	0|1	4	0.548828	0.00756121	PRRC2C
1	171483717	A	375	C	96	AF=0.25	0/0/0/1	0|1	4	5.4354e-40	0.02199	PRRC2C
1	171673054	T	2	C	42	AF=0.75	0/1/1/1	1|0	4	1.12664e-10	0.000692464	VAMP4
1	171713808	G	0	C	12	AF=0.75	0/1/1/1	1|0	4	0.000488281	0.0459291	None
1	171751236	T	32	C	205	AF=0.75	0/1/1/1	1|0	4	4.46082e-32	1.69932e-05	METTL13
1	171753039	A	47	G	309	AF=0.75	0/1/1/1	1|0	4	2.14128e-48	5.64393e-08	METTL13
1	171760567	T	7	C	6	AF=0.75	0/1/1/1	1|0	4	1	0.0242901	METTL13
1	172549294	C	0	G	12	AF=0.75	0/1/1/1	1|0	4	0.000488281	0.0459291	SUCO
1	172575959	T	0	G	17	AF=0.75	0/1/1/1	1|0	4	1.52588e-05	0.0106177	SUCO
1	173389187	A	1	G	10	AF=0.25	0/0/0/1	0|1	4	0.0117188	8.10623e-06	BC136808, LOC100506023
1	173451088	G	35	A	35	AF=0.25	0/0/0/1	0|1	4	1	1.00566e-05	PRDX6
1	173457599	A	1699	G	442	AF=0.25	0/0/0/1	0|1	4	5.36835e-173	2.34113e-06	PRDX6
1	173561334	T	0	C	10	AF=0.25	0/0/0/1	0|1	4	0.00195312	9.53674e-07	SLC9C2
1	173561537	G	0	T	10	AF=0.25	0/0/0/1	0|1	4	0.00195312	9.53674e-07	SLC9C2
1	173774831	T	0	A	38	AF=0.75	0/1/1/1	1|0	4	7.27596e-12	3.42356e-05	CENPL
1	173830217	C	9	T	14	AF=0.25	0/0/0/1	0|1	4	0.404873	0.000283086	None
1	173831882	A	0	G	10	AF=0.25	0/0/0/1	0|1	4	0.00195312	9.53674e-07	None
1	173834605	G	985	A	267	AF=0.25	0/0/0/1	0|1	4	5.96158e-97	0.00239907	GAS5
1	173834632	G	2601	A	561	AF=0.25	0/0/0/1	0|1	4	5.61755395268088e-312	1.62148e-22	GAS5
1	173859100	A	56	G	9	AF=0.25	0/0/0/1	0|1	4	2.04925e-09	0.0437064	None
1	173900918	T	69	C	129	AF=0.75	0/1/1/1	1|0	4	2.40868e-05	0.00227719	RC3H1
1	174135575	G	0	A	16	AF=0.25	0/0/0/1	0|1	4	3.05176e-05	2.32831e-10	RABGAP1L
1	174200226	A	0	T	15	AF=0.75	0/1/1/1	1|0	4	6.10352e-05	0.0306633	RABGAP1L
1	174214856	C	26	T	25	AF=0.25	0/0/0/1	0|1	4	1	0.000251262	RABGAP1L
1	174218110	G	5	T	18	AF=0.25	0/0/0/1	0|1	4	0.010622	1.27104e-07	RABGAP1L
1	174577120	G	0	T	20	AF=0.75	0/1/1/1	1|0	4	1.90735e-06	0.00711335	RABGAP1L
1	174592811	G	0	A	13	AF=0.25	0/0/0/1	0|1	4	0.000244141	1.49012e-08	RABGAP1L
1	174737697	C	0	T	16	AF=0.75	0/1/1/1	1|0	4	3.05176e-05	0.0174923	RABGAP1L
1	174753739	T	0	C	14	AF=0.75	0/1/1/1	1|0	4	0.00012207	0.0281275	RABGAP1L
1	174961501	C	7	T	56	AF=0.75	0/1/1/1	1|0	4	1.36367e-10	0.0085277	RABGAP1L
1	174962082	C	10	T	10	AF=0.75	0/1/1/1	1|0	4	1	0.0170356	RABGAP1L
1	174964850	C	0	T	27	AF=0.75	0/1/1/1	1|0	4	1.49012e-08	0.000585219	None
1	174974939	G	17	A	19	AF=0.75	0/1/1/1	1|0	4	0.867939	0.00359715	CACYBP
1	174986625	T	0	C	17	AF=0.75	0/1/1/1	1|0	4	1.52588e-05	0.0106177	MRPS14
1	176034216	A	0	T	15	AF=0.75	0/1/1/1	1|0	4	6.10352e-05	0.0306633	RFWD2
1	176274765	T	0	C	10	AF=0.25	0/0/0/1	0|1	4	0.00195312	9.53674e-07	None
1	176852547	G	18	T	24	AF=0.75	0/1/1/1	1|0	4	0.440799	0.0116235	ASTN1
1	178696750	T	12	C	14	AF=0.25	0/0/0/1	0|1	4	0.845019	0.00209389	RALGPS2
1	178989016	C	13	T	8	AF=0.75	0/1/1/1	1|0	4	0.38331	0.000371626	None
1	178989064	A	0	G	13	AF=0.25	0/0/0/1	0|1	4	0.000244141	1.49012e-08	None
1	179002969	A	0	C	15	AF=0.25	0/0/0/1	0|1	4	6.10352e-05	9.31323e-10	FAM20B
1	179026527	C	0	T	12	AF=0.5	0/0/1/1	0|1	4	0.000488281	0.000488281	FAM20B
1	179026567	C	0	A	12	AF=0.25	0/0/0/1	0|1	4	0.000488281	5.96046e-08	FAM20B
1	179041398	A	113	G	60	AF=0.25	0/0/0/1	0|1	4	6.82516e-05	0.00477332	FAM20B
1	179042300	C	187	A	41	AF=0.25	0/0/0/1	0|1	4	1.8169e-23	0.0141961	FAM20B
1	179050935	C	0	T	20	AF=0.75	0/1/1/1	1|0	4	1.90735e-06	0.00711335	None
1	179054692	T	11	G	15	AF=0.25	0/0/0/1	0|1	4	0.557197	0.000389842	TOR3A
1	179069429	C	3	T	63	AF=0.75	0/1/1/1	1|0	4	1.30028e-15	2.18698e-05	ABL2
1	179070120	C	32	T	33	AF=0.75	0/1/1/1	1|0	4	1	3.59876e-05	ABL2
1	179070334	C	41	G	66	AF=0.75	0/1/1/1	1|0	4	0.0199004	0.00239546	ABL2
1	179071756	G	65	A	25	AF=0.5	0/0/1/1	1|0	4	2.96645e-05	2.96645e-05	ABL2
1	179071865	G	52	A	34	AF=0.75	0/1/1/1	1|0	4	0.0661526	3.59318e-12	ABL2
1	179071918	G	63	T	29	AF=0.75	0/1/1/1	1|0	4	0.00050909	2.33582e-18	ABL2
1	179072728	T	28	C	37	AF=0.75	0/1/1/1	1|0	4	0.321084	0.00143543	ABL2
1	179073039	C	12	G	68	AF=0.75	0/1/1/1	1|0	4	1.20165e-10	0.0387359	ABL2
1	179074869	T	11	G	76	AF=0.75	0/1/1/1	1|0	4	4.21135e-13	0.00619418	ABL2
1	179195777	A	0	G	13	AF=0.25	0/0/0/1	0|1	4	0.000244141	1.49012e-08	ABL2
1	179319541	C	162	G	92	AF=0.25	0/0/0/1	0|1	4	1.32856e-05	8.22842e-05	SOAT1
1	179320578	A	170	G	104	AF=0.25	0/0/0/1	0|1	4	8.00085e-05	2.43677e-06	SOAT1
1	179323738	C	6	A	11	AF=0.25	0/0/0/1	0|1	4	0.332306	0.000625046	SOAT1
1	179810201	A	10	G	15	AF=0.25	0/0/0/1	0|1	4	0.424356	0.000214512	TOR1AIP2
1	179813613	T	18	C	14	AF=0.25	0/0/0/1	0|1	4	0.596615	0.0225725	TOR1AIP2
1	179831963	T	96	C	62	AF=0.25	0/0/0/1	0|1	4	0.00844792	9.69448e-05	TOR1AIP2
1	179845022	G	7	A	21	AF=0.25	0/0/0/1	0|1	4	0.012541	4.01036e-08	TOR1AIP2
1	179852074	T	61	C	120	AF=0.75	0/1/1/1	1|0	4	1.37775e-05	0.0097393	TOR1AIP1
1	179876988	C	82	G	121	AF=0.75	0/1/1/1	1|0	4	0.00749853	1.3946e-06	TOR1AIP1
1	179887681	G	57	C	116	AF=0.75	0/1/1/1	1|0	4	8.56602e-06	0.0177634	TOR1AIP1
1	179887788	C	54	T	95	AF=0.75	0/1/1/1	1|0	4	0.000983333	0.00234201	TOR1AIP1
1	179888228	G	59	C	53	AF=0.75	0/1/1/1	1|0	4	0.6368	4.30593e-10	TOR1AIP1
1	179890655	C	3	T	9	AF=0.25	0/0/0/1	0|1	4	0.145996	0.000391662	None
1	179951114	A	0	G	13	AF=0.75	0/1/1/1	1|0	4	0.000244141	0.0480474	CEP350
1	179979828	T	0	C	19	AF=0.75	0/1/1/1	1|0	4	3.8147e-06	0.00651671	CEP350
1	179989742	G	5	C	55	AF=0.75	0/1/1/1	1|0	4	1.03827e-11	0.00154865	CEP350
1	180037987	A	9	G	3	AF=0.75	0/1/1/1	1|0	4	0.145996	0.000391662	CEP350
1	180037988	C	3	T	9	AF=0.25	0/0/0/1	0|1	4	0.145996	0.000391662	CEP350
1	180043507	A	12	G	7	AF=0.75	0/1/1/1	1|0	4	0.359283	0.000484379	CEP350
1	180043539	G	12	A	7	AF=0.75	0/1/1/1	1|0	4	0.359283	0.000484379	CEP350
1	180136504	C	0	G	20	AF=0.75	0/1/1/1	1|0	4	1.90735e-06	0.00711335	QSOX1
1	180151666	A	0	T	17	AF=0.75	0/1/1/1	1|0	4	1.52588e-05	0.0106177	AX747393, QSOX1
1	180239535	T	8	C	51	AF=0.75	0/1/1/1	1|0	4	9.05239e-09	0.0493344	LHX4, LOC100527964
1	180240106	T	15	C	16	AF=0.75	0/1/1/1	1|0	4	1	0.0056249	LHX4, LOC100527964
1	180240752	C	20	T	4	AF=0.75	0/1/1/1	1|0	4	0.00154388	3.26107e-09	LHX4, LOC100527964
1	180243524	A	0	G	25	AF=0.75	0/1/1/1	1|0	4	5.96046e-08	0.00166837	LHX4, LOC100527964
1	180246451	G	0	A	43	AF=0.75	0/1/1/1	1|0	4	2.27374e-13	8.17319e-06	None
1	180357408	A	0	C	13	AF=0.75	0/1/1/1	1|0	4	0.000244141	0.0480474	ACBD6
1	180367101	T	13	C	3	AF=0.75	0/1/1/1	1|0	4	0.0212708	3.78327e-06	ACBD6
1	180383164	C	0	T	15	AF=0.75	0/1/1/1	1|0	4	6.10352e-05	0.0306633	ACBD6
1	180456627	C	0	T	15	AF=0.25	0/0/0/1	0|1	4	6.10352e-05	9.31323e-10	ACBD6
1	180740957	T	0	C	12	AF=0.75	0/1/1/1	1|0	4	0.000488281	0.0459291	XPR1
1	180799656	C	0	G	12	AF=0.75	0/1/1/1	1|0	4	0.000488281	0.0459291	XPR1
1	180847442	C	0	T	10	AF=0.25	0/0/0/1	0|1	4	0.00195312	9.53674e-07	XPR1
1	180847645	G	1	A	14	AF=0.25	0/0/0/1	0|1	4	0.000976562	4.28408e-08	XPR1
1	180849494	T	8	C	8	AF=0.25	0/0/0/1	0|1	4	1	0.0371526	XPR1
1	180853719	C	54	T	38	AF=0.75	0/1/1/1	1|0	4	0.11737	1.05499e-11	XPR1
1	180917994	T	4	C	9	AF=0.25	0/0/0/1	0|1	4	0.266846	0.000989124	AK056657, KIAA1614
1	180919151	T	9	C	22	AF=0.25	0/0/0/1	0|1	4	0.0294494	9.86408e-08	AK056657, KIAA1614
1	180949965	T	0	C	15	AF=0.75	0/1/1/1	1|0	4	6.10352e-05	0.0306633	STX6
1	180950126	C	0	T	17	AF=0.75	0/1/1/1	1|0	4	1.52588e-05	0.0106177	STX6
1	180951692	A	10	G	14	AF=0.25	0/0/0/1	0|1	4	0.541256	0.000523093	STX6
1	180981477	C	0	A	16	AF=0.75	0/1/1/1	1|0	4	3.05176e-05	0.0174923	STX6
1	180981696	G	0	C	16	AF=0.75	0/1/1/1	1|0	4	3.05176e-05	0.0174923	STX6
1	181011166	G	0	A	21	AF=0.75	0/1/1/1	1|0	4	9.53674e-07	0.00406549	MR1
1	181030115	C	2	T	12	AF=0.25	0/0/0/1	0|1	4	0.0129395	3.2112e-06	MR1
1	181030829	G	3	A	8	AF=0.25	0/0/0/1	0|1	4	0.226562	0.00118828	MR1
1	181057874	T	222	G	119	AF=0.25	0/0/0/1	0|1	4	2.62463e-08	4.49795e-05	IER5
1	181998402	C	4	T	34	AF=0.75	0/1/1/1	1|0	4	6.03854e-07	0.0390716	None
1	182129988	G	9	T	18	AF=0.25	0/0/0/1	0|1	4	0.122078	6.05048e-06	None
[truncated: 17,242 more rows]
