# Supplementary material for: Comprehensive, integrated, and phased whole-genome analysis of the primary ENCODE cell line K562
Source: HighWire-hosted journal article supplement (doi:10.1101/gr.234948.118), 2019-02-08
Supplement: Supplemental_Table_S12.xlsx [file Supplemental_Table_S12.xlsx]

## Sheet: Rep1_False_Positive_ASE
hg19; 1-based genomic coordinate counting
Table S12
Chr	Position	Ref allele	# RNA-seq reads of ref allele	Alt allele	# RNA-seq reads of alt allele	Frequency of alt allele in WGS	Genotype in WGS	CN	Binomial test p=0.5	Binomial test p=AF	Gene Overlap
1	5934500	T	14	C	4	AF=0.25	0/1/1/1	4	0.0308838	1	NPHP4
1	14746311	G	135	A	49	AF=0.25	0/1/1/1	4	1.72187e-10	0.609798	None
1	16930211	C	6	A	27	AF=0.75	0/1/1/1	4	0.000324063	0.427686	NBPF1
1	16932105	T	31	C	72	AF=0.75	0/1/1/1	4	6.59633e-05	0.254622	NBPF1
1	16952260	T	55	C	26	AF=0.25	0/1/1/1	4	0.00168864	0.157333	CROCCP2
1	22005665	C	19	T	83	AF=0.75	0/1/1/1	4	1.01583e-10	0.169242	USP48
1	23346119	G	164	C	65	AF=0.25	0/1/1/1	4	4.71884e-11	0.252118	KDM1A
1	31780012	G	0	A	10	AF=0.75	0/1/1/1	4	0.00195312	0.0760412	ZCCHC17
1	31849209	C	0	G	11	AF=0.75	0/1/1/1	4	0.000976562	0.0765626	None
1	36282608	G	59	T	14	AF=0.25	0/1/1/1	4	1.01364e-07	0.28154	AGO4
1	39728647	C	2	G	20	AF=0.75	0/1/1/1	4	0.000121117	0.135238	MACF1
1	41155173	T	11	C	30	AF=0.75	0/1/1/1	4	0.004324	0.8568	LOC100130557
1	51443441	C	3	T	16	AF=0.75	0/1/1/1	4	0.00442505	0.437969	None
1	55505447	C	172	T	103	AF=0.333	0/1/1/1	3	3.778e-05	0.159079	PCSK9
1	55506103	C	27	G	8	AF=0.333	0/1/1/1	3	0.00187823	0.213446	PCSK9
1	55523483	C	3	T	15	AF=0.667	0/1/1/1	3	0.00753784	0.209209	PCSK9
1	55541174	A	93	G	227	AF=0.667	0/1/1/1	3	4.44691e-14	0.109638	USP24
1	55551718	G	5	A	21	AF=0.667	0/1/1/1	3	0.00249392	0.148446	USP24
1	55553554	T	6	C	23	AF=0.667	0/1/1/1	3	0.0023157	0.171514	USP24
1	55553569	G	6	A	25	AF=0.667	0/1/1/1	3	0.00087791	0.126647	USP24
1	55638075	G	31	A	65	AF=0.667	0/1/1/1	3	0.000674719	0.913891	USP24
1	59012404	A	29	C	9	AF=0.333	0/1/1/1	3	0.00165805	0.232455	DAB1, OMA1
1	59121036	A	57	C	143	AF=0.667	0/1/1/1	3	1.02992e-09	0.15472	MYSM1
1	59124546	A	10	G	25	AF=0.667	0/1/1/1	3	0.0166738	0.596596	MYSM1
1	59124803	C	55	T	99	AF=0.667	0/1/1/1	3	0.000489793	0.549675	MYSM1
1	59147926	T	29	C	89	AF=0.667	0/1/1/1	3	2.82303e-08	0.0502961	MYSM1
1	59787350	T	7	G	18	AF=0.667	0/1/1/1	3	0.0432853	0.674741	FGGY
1	62903547	C	5	T	22	AF=0.667	0/1/1/1	3	0.00151372	0.150899	USP1
1	62960101	A	9	G	35	AF=0.667	0/1/1/1	3	0.000106045	0.0787101	DOCK7
1	63906965	G	25	A	5	AF=0.333	0/1/1/1	3	0.000324914	0.0543561	ITGB3BP
1	63907521	T	47	C	18	AF=0.333	0/1/1/1	3	0.00042213	0.360489	ITGB3BP
1	65723174	C	19	A	4	AF=0.333	0/1/1/1	3	0.00259948	0.123957	DNAJC6
1	65858145	G	107	A	66	AF=0.333	0/1/1/1	3	0.00226217	0.196578	DNAJC6
1	65860687	A	190	C	92	AF=0.333	0/1/1/1	3	5.41061e-09	0.849776	DNAJC6
1	65879488	A	87	C	134	AF=0.667	0/1/1/1	3	0.00190629	0.0632375	DNAJC6
1	65895130	A	30	G	9	AF=0.333	0/1/1/1	3	0.00106502	0.233642	LEPR, LEPROT
1	65897981	G	277	A	115	AF=0.333	0/1/1/1	3	1.56018e-16	0.096948	LEPR, LEPROT
1	65898873	G	359	C	157	AF=0.333	0/1/1/1	3	3.08767e-19	0.1756	LEPR, LEPROT
1	65931394	G	26	C	7	AF=0.333	0/1/1/1	3	0.00131873	0.194851	LEPR
1	65941532	G	102	A	40	AF=0.333	0/1/1/1	3	1.9896e-07	0.212921	LEPR
1	65943872	A	52	G	21	AF=0.333	0/1/1/1	3	0.00037134	0.457702	LEPR
1	67678993	T	12	C	30	AF=0.667	0/1/1/1	3	0.0079159	0.624072	IL23R
1	67727555	C	89	T	29	AF=0.333	0/1/1/1	3	2.82303e-08	0.0502961	None
1	67727778	C	14	T	38	AF=0.667	0/1/1/1	3	0.00119512	0.379103	None
1	67875203	C	75	T	50	AF=0.333	0/1/1/1	3	0.0314093	0.128484	SERBP1
1	67875533	T	46	A	79	AF=0.667	0/1/1/1	3	0.00402473	0.395106	SERBP1
1	70711236	A	1	G	12	AF=0.667	0/1/1/1	3	0.00341797	0.0731862	SRSF11
1	70905354	G	15	A	36	AF=0.667	0/1/1/1	3	0.00460131	0.656428	CTH
1	71472911	G	45	A	26	AF=0.333	0/1/1/1	3	0.0319272	0.532234	PTGER3
1	71531596	A	127	G	208	AF=0.667	0/1/1/1	3	1.12847e-05	0.0818404	ZRANB2, ZRANB2-AS1
1	71535608	T	38	C	100	AF=0.667	0/1/1/1	3	1.28848e-07	0.175219	ZRANB2
1	74672474	G	35	A	9	AF=0.333	0/1/1/1	3	0.000106045	0.0787101	FPGT, FPGT-TNNI3K
1	77556766	T	35	A	55	AF=0.667	0/1/1/1	3	0.0445975	0.264705	PIGK
1	77558057	G	93	C	35	AF=0.333	0/1/1/1	3	2.98324e-07	0.160482	PIGK
1	78184325	A	117	G	246	AF=0.667	0/1/1/1	3	1.12453e-11	0.696855	USP33
1	78421785	G	21	A	41	AF=0.667	0/1/1/1	3	0.0151341	0.893766	FUBP1
1	85110971	A	113	C	59	AF=0.333	0/1/1/1	3	4.65489e-05	0.808321	SSX2IP
1	85640432	G	16	A	44	AF=0.667	0/1/1/1	3	0.000394043	0.337706	SYDE2
1	85640433	C	16	A	44	AF=0.667	0/1/1/1	3	0.000394043	0.337706	SYDE2
1	85646151	G	4	A	17	AF=0.667	0/1/1/1	3	0.00719738	0.245886	SYDE2
1	85720013	T	30	C	11	AF=0.333	0/1/1/1	3	0.004324	0.413045	C1orf52
1	85742264	G	27	C	49	AF=0.667	0/1/1/1	3	0.0154403	0.71533	BCL10, LOC646626
1	86118445	C	100	A	34	AF=0.333	0/1/1/1	3	9.92011e-09	0.0542097	ZNHIT6
1	86118587	A	67	T	31	AF=0.333	0/1/1/1	3	0.000354534	0.830353	ZNHIT6
1	89225976	T	79	C	44	AF=0.333	0/1/1/1	3	0.00204504	0.566711	PKN2
1	89271574	T	54	C	17	AF=0.333	0/1/1/1	3	1.25268e-05	0.102242	PKN2
1	89415576	T	8	C	21	AF=0.667	0/1/1/1	3	0.0241195	0.562011	CCBL2
1	91972374	T	2	G	14	AF=0.667	0/1/1/1	3	0.00418091	0.109353	CDC7
1	92975244	T	24	A	11	AF=0.333	0/1/1/1	3	0.0409596	1	EVI5
1	92977989	T	7	A	24	AF=0.667	0/1/1/1	3	0.00332689	0.254392	EVI5
1	93303603	T	5	C	17	AF=0.667	0/1/1/1	3	0.0169005	0.369388	FAM69A, RPL5, SNORA66
1	93587435	C	1	T	12	AF=0.667	0/1/1/1	3	0.00341797	0.0731862	MTF2
1	93620393	G	184	A	322	AF=0.667	0/1/1/1	3	8.922e-10	0.14396	TMED5
1	93624374	T	16	C	36	AF=0.667	0/1/1/1	3	0.00778744	0.769889	TMED5
1	93791437	G	23	C	53	AF=0.667	0/1/1/1	3	0.000764582	0.627731	LOC100131564
1	93799644	C	22	T	8	AF=0.333	0/1/1/1	3	0.0161248	0.562144	LOC100131564
1	93804952	G	40	A	97	AF=0.667	0/1/1/1	3	1.22026e-06	0.320489	LOC100131564
1	94343023	A	252	G	151	AF=0.333	0/1/1/1	3	5.54437e-07	0.0810518	DNTTIP2
1	94343233	T	307	C	133	AF=0.333	0/1/1/1	3	6.35342e-17	0.188394	DNTTIP2
1	95658770	T	7	C	30	AF=0.667	0/1/1/1	3	0.000191076	0.079769	AK090700, TMEM56, TMEM56-RWDD3
1	95662658	G	5	T	20	AF=0.667	0/1/1/1	3	0.00407732	0.203802	AK090700, TMEM56, TMEM56-RWDD3
1	95705972	A	22	G	4	AF=0.333	0/1/1/1	3	0.000533521	0.0605731	RWDD3, TMEM56-RWDD3
1	95709939	T	107	G	45	AF=0.333	0/1/1/1	3	5.28986e-07	0.389424	RWDD3, TMEM56-RWDD3
1	97250022	A	11	G	25	AF=0.667	0/1/1/1	3	0.0288167	0.860092	PTBP2
1	100757763	T	87	C	133	AF=0.667	0/1/1/1	3	0.00233866	0.0533525	RTCA
1	101340134	C	16	T	5	AF=0.333	0/1/1/1	3	0.0266037	0.488508	EXTL2
1	101445821	C	55	T	23	AF=0.333	0/1/1/1	3	0.000377792	0.54849	SLC30A7
1	101488761	C	21	T	4	AF=0.333	0/1/1/1	3	0.000910521	0.0877184	DPH5
1	101540999	T	18	C	47	AF=0.667	0/1/1/1	3	0.00042213	0.360489	BC045807, BX538249
1	144866643	G	101	A	188	AF=0.667	0/1/1/1	3	3.47092e-07	0.574384	LOC100288142, LOC653513, NBPF9, PDE4DIP
1	144874815	T	28	C	82	AF=0.667	0/1/1/1	3	2.51941e-07	0.085748	LOC100288142, LOC653513, NBPF9, PDE4DIP
1	144880832	T	72	C	121	AF=0.667	0/1/1/1	3	0.000516968	0.251979	LOC100288142, LOC653513, NBPF9, PDE4DIP
1	144886197	A	50	T	121	AF=0.667	0/1/1/1	3	5.63666e-08	0.291564	LOC100288142, LOC653513, NBPF9, PDE4DIP
1	144886588	A	3	G	14	AF=0.667	0/1/1/1	3	0.0127258	0.20607	LOC100288142, LOC653513, NBPF9, PDE4DIP
1	144930596	C	5	A	17	AF=0.667	0/1/1/1	3	0.0169005	0.369388	LOC100288142, LOC653513, NBPF9, PDE4DIP
1	145690472	C	80	T	49	AF=0.333	0/1/1/1	3	0.00800767	0.263135	LOC100288142, NBPF10
1	146626922	T	40	C	20	AF=0.333	0/1/1/1	3	0.0134893	1	PRKAB2
1	146628635	A	57	G	25	AF=0.333	0/1/1/1	3	0.000534721	0.640542	PRKAB2
1	146731822	C	20	T	40	AF=0.667	0/1/1/1	3	0.0134893	1	CHD1L
1	146739540	T	34	G	93	AF=0.667	0/1/1/1	3	1.60558e-07	0.13193	CHD1L
1	146741960	A	34	C	14	AF=0.333	0/1/1/1	3	0.0055152	0.646588	CHD1L
1	146759320	C	316	G	138	AF=0.333	0/1/1/1	3	3.86648e-17	0.195696	CHD1L
1	146854539	T	8	C	30	AF=0.667	0/1/1/1	3	0.000471987	0.12292	LINC00624
1	149815327	G	63	T	20	AF=0.333	0/1/1/1	3	2.4307e-06	0.0808808	None
1	150272047	A	13	G	4	AF=0.333	0/1/1/1	3	0.0490417	0.453466	MRPS21
1	150281043	C	74	A	26	AF=0.333	0/1/1/1	3	1.66736e-06	0.137377	None
1	150281501	A	28	C	12	AF=0.333	0/1/1/1	3	0.016589	0.739121	None
1	150447462	C	13	T	27	AF=0.667	0/1/1/1	3	0.0384773	1	RPRD2
1	150471056	C	131	T	229	AF=0.667	0/1/1/1	3	2.70522e-07	0.218775	TARS2
1	150531050	G	146	A	338	AF=0.667	0/1/1/1	3	1.37092e-18	0.148123	ADAMTSL4
1	150591732	A	15	G	31	AF=0.667	0/1/1/1	3	0.0258961	1	None
1	150618961	T	23	G	49	AF=0.667	0/1/1/1	3	0.00294276	0.900669	GOLPH3L
1	150944707	T	23	C	8	AF=0.333	0/1/1/1	3	0.0106738	0.449088	CERS2
1	150945794	A	28	C	14	AF=0.333	0/1/1/1	3	0.0435585	1	CERS2
1	151042229	G	28	A	46	AF=0.667	0/1/1/1	3	0.047393	0.459274	None
1	151059667	T	1	C	12	AF=0.667	0/1/1/1	3	0.00341797	0.0731862	GABPB2
1	151258110	G	22	C	9	AF=0.333	0/1/1/1	3	0.0294494	0.705743	ZNF687
1	151372138	G	3028	A	1422	AF=0.333	0/1/1/1	3	8.69685e-131	0.0584009	PSMB4
1	151374025	T	1192	C	2275	AF=0.667	0/1/1/1	3	1.17956e-76	0.176622	PSMB4
1	151375584	T	54	C	81	AF=0.667	0/1/1/1	3	0.0248758	0.100842	POGZ
1	151431632	T	57	C	31	AF=0.333	0/1/1/1	3	0.00734341	0.734621	POGZ
1	151668295	A	88	C	48	AF=0.333	0/1/1/1	3	0.000763409	0.649355	SNX27
1	151847193	A	123	C	264	AF=0.667	0/1/1/1	3	6.17648e-13	0.553215	THEM4
1	151859166	T	36	C	17	AF=0.333	0/1/1/1	3	0.0126603	1	THEM4
1	153779412	A	26	G	60	AF=0.667	0/1/1/1	3	0.000316999	0.647328	GATAD2B
1	153904574	T	19	C	5	AF=0.333	0/1/1/1	3	0.00661075	0.27827	DENND4B
1	153907839	T	30	C	9	AF=0.333	0/1/1/1	3	0.00106502	0.233642	DENND4B
1	153907908	T	20	C	6	AF=0.333	0/1/1/1	3	0.00935531	0.30574	DENND4B
1	153909069	G	136	C	83	AF=0.333	0/1/1/1	3	0.000416625	0.151945	DENND4B
1	153920286	G	71	A	48	AF=0.333	0/1/1/1	3	0.0432683	0.119199	CRTC2
1	153941514	C	34	T	15	AF=0.333	0/1/1/1	3	0.00939924	0.763226	CREB3L4
1	154143205	T	11	G	38	AF=0.667	0/1/1/1	3	0.000141971	0.129201	TPM3
1	154918244	G	45	A	22	AF=0.333	0/1/1/1	3	0.00674145	1	PBXIP1
1	154989595	T	108	C	72	AF=0.333	0/1/1/1	3	0.00890055	0.0580243	ZBTB7B
1	155026871	G	154	T	97	AF=0.333	0/1/1/1	3	0.000387543	0.081404	ADAM15, LOC100505666
1	155030557	A	146	C	91	AF=0.333	0/1/1/1	3	0.000428489	0.0983731	ADAM15, LOC100505666
1	155237639	C	5	T	18	AF=0.667	0/1/1/1	3	0.010622	0.276561	CLK2
1	155244092	C	6	T	18	AF=0.667	0/1/1/1	3	0.0226558	0.517006	CLK2
1	155260350	A	136	G	261	AF=0.667	0/1/1/1	3	3.50766e-10	0.709377	PKLR
1	155260383	G	134	T	327	AF=0.667	0/1/1/1	3	1.09842e-19	0.0540517	PKLR
1	155260401	C	272	T	157	AF=0.333	0/1/1/1	3	3.09246e-08	0.151572	PKLR
1	155279482	T	4	G	21	AF=0.667	0/1/1/1	3	0.000910521	0.0877184	FDPS
1	155426678	C	24	T	6	AF=0.333	0/1/1/1	3	0.00143091	0.173545	ASH1L
1	155527235	T	15	G	3	AF=0.333	0/1/1/1	3	0.00753784	0.209209	ASH1L
1	155538579	A	15	G	52	AF=0.667	0/1/1/1	3	6.45907e-06	0.068792	None
1	155658940	T	928	G	1839	AF=0.667	0/1/1/1	3	2.81811e-68	0.793184	DAP3, YY1AP1
1	155723297	T	21	C	37	AF=0.667	0/1/1/1	3	0.0479403	0.676436	GON4L, YY1AP1
1	155723420	T	13	C	32	AF=0.667	0/1/1/1	3	0.00660882	0.63585	GON4L, YY1AP1
1	155868625	G	5	A	26	AF=0.667	0/1/1/1	3	0.000192195	0.0547235	RIT1
1	156107534	C	135	T	271	AF=0.667	0/1/1/1	3	1.35307e-11	1	LMNA
1	156171296	C	21	G	5	AF=0.333	0/1/1/1	3	0.00249392	0.148446	SLC25A44
1	156180349	T	35	A	9	AF=0.333	0/1/1/1	3	0.000106045	0.0787101	SLC25A44
1	156181007	C	38	G	10	AF=0.333	0/1/1/1	3	6.16964e-05	0.0677954	SLC25A44
1	156181770	A	144	G	64	AF=0.333	0/1/1/1	3	2.94119e-08	0.462622	SLC25A44
1	156208216	T	18	C	5	AF=0.333	0/1/1/1	3	0.010622	0.276561	PMF1, PMF1-BGLAP
1	156208230	A	5	G	18	AF=0.667	0/1/1/1	3	0.010622	0.276561	PMF1, PMF1-BGLAP
1	156304782	A	3	G	14	AF=0.667	0/1/1/1	3	0.0127258	0.20607	CCT3
1	156504104	A	7	C	27	AF=0.667	0/1/1/1	3	0.000821395	0.145148	IQGAP3
1	156564640	G	304	A	175	AF=0.333	0/1/1/1	3	4.02511e-09	0.133174	APOA1BP, GPATCH4
1	156758864	C	26	T	12	AF=0.333	0/1/1/1	3	0.0335524	1	PRCC
1	156760887	C	3	A	18	AF=0.667	0/1/1/1	3	0.00148964	0.067485	PRCC
1	156784982	T	31	C	66	AF=0.667	0/1/1/1	3	0.000490158	0.830004	SH2D2A
1	156840177	A	33	T	8	AF=0.333	0/1/1/1	3	0.000112221	0.06827	NTRK1
1	156846233	G	133	A	49	AF=0.333	0/1/1/1	3	3.73008e-10	0.0705985	NTRK1
1	156848995	C	74	T	156	AF=0.667	0/1/1/1	3	6.78406e-08	0.779658	NTRK1
1	156905584	A	52	G	18	AF=0.333	0/1/1/1	3	5.84955e-05	0.20517	ARHGEF11
1	158587143	C	27	T	9	AF=0.333	0/1/1/1	3	0.00393317	0.376869	SPTA1
1	158597507	G	73	C	150	AF=0.667	0/1/1/1	3	2.76486e-07	0.887217	SPTA1
1	158609300	C	1	G	9	AF=0.667	0/1/1/1	3	0.0214844	0.180663	SPTA1
1	158626378	C	40	T	20	AF=0.333	0/1/1/1	3	0.0134893	1	SPTA1
1	159994898	G	1	A	12	AF=0.667	0/1/1/1	3	0.00341797	0.0731862	None
1	159995482	C	12	G	42	AF=0.667	0/1/1/1	3	5.20945e-05	0.111042	None
1	160246485	C	11	T	25	AF=0.667	0/1/1/1	3	0.0288167	0.860092	DCAF8
1	160247185	G	120	C	257	AF=0.667	0/1/1/1	3	1.41566e-12	0.58483	DCAF8, PEX19
1	160512616	G	17	A	39	AF=0.667	0/1/1/1	3	0.00456153	0.776905	CD84
1	160971714	C	2	T	14	AF=0.667	0/1/1/1	3	0.00418091	0.109353	F11R
1	161575447	T	43	G	19	AF=0.333	0/1/1/1	3	0.00315606	0.787691	None
1	161718949	G	24	T	57	AF=0.667	0/1/1/1	3	0.000317317	0.555988	None
1	161721351	A	2	G	10	AF=0.667	0/1/1/1	3	0.0385742	0.358815	DUSP12
1	161725772	G	12	A	28	AF=0.667	0/1/1/1	3	0.016589	0.739121	DUSP12
1	161930954	G	12	A	43	AF=0.667	0/1/1/1	3	3.30538e-05	0.0852043	ATF6
1	162381833	C	4	G	33	AF=0.75	0/1/1/1	4	1.08439e-06	0.0555983	SH2D1B
1	162396614	G	0	T	10	AF=0.75	0/1/1/1	4	0.00195312	0.0760412	None
1	162531494	C	336	T	134	AF=0.25	0/1/1/1	4	4.45699e-21	0.0880876	UAP1
1	162607915	A	0	T	11	AF=0.75	0/1/1/1	4	0.000976562	0.0765626	DDR2
1	163218278	T	0	C	10	AF=0.75	0/1/1/1	4	0.00195312	0.0760412	RGS5
1	163262016	A	0	G	10	AF=0.75	0/1/1/1	4	0.00195312	0.0760412	RGS5
1	163269740	T	0	C	11	AF=0.75	0/1/1/1	4	0.000976562	0.0765626	RGS5
1	163271393	T	0	G	10	AF=0.75	0/1/1/1	4	0.00195312	0.0760412	RGS5
1	163271403	G	0	A	10	AF=0.75	0/1/1/1	4	0.00195312	0.0760412	RGS5
1	163281090	C	0	T	11	AF=0.75	0/1/1/1	4	0.000976562	0.0765626	RGS5
1	163286640	T	3	A	17	AF=0.75	0/1/1/1	4	0.00257683	0.439374	RGS5
1	163288544	A	1	G	16	AF=0.75	0/1/1/1	4	0.000274658	0.0903498	RGS5
1	165878498	C	35	T	117	AF=0.75	0/1/1/1	4	1.58225e-11	0.639785	UCK2
1	167510837	T	459	C	1407	AF=0.75	0/1/1/1	4	1.51576e-111	0.708248	CREG1
1	167512227	A	3	G	18	AF=0.75	0/1/1/1	4	0.00148964	0.321596	CREG1
1	167512558	T	8	G	20	AF=0.75	0/1/1/1	4	0.0356981	0.664047	CREG1
1	167512580	G	8	T	22	AF=0.75	0/1/1/1	4	0.0161248	0.833764	CREG1
1	167515272	T	13	C	60	AF=0.75	0/1/1/1	4	2.30707e-08	0.177217	CREG1
1	167523004	G	5	A	34	AF=0.75	0/1/1/1	4	2.42991e-06	0.0950817	CREG1
1	167601553	A	30	C	6	AF=0.25	0/1/1/1	4	6.96017e-05	0.335455	RCSD1
1	167602641	G	28	A	11	AF=0.25	0/1/1/1	4	0.0094753	0.711271	RCSD1
1	167603062	C	61	G	29	AF=0.25	0/1/1/1	4	0.000972761	0.114688	RCSD1
1	167612162	C	38	T	10	AF=0.25	0/1/1/1	4	6.16964e-05	0.617767	RCSD1
1	167632271	A	3	G	14	AF=0.75	0/1/1/1	4	0.0127258	0.587712	RCSD1
1	167632618	G	0	A	11	AF=0.75	0/1/1/1	4	0.000976562	0.0765626	RCSD1
1	167632776	A	6	T	28	AF=0.75	0/1/1/1	4	0.000195126	0.428594	RCSD1
1	167677685	A	29	C	7	AF=0.25	0/1/1/1	4	0.000312551	0.564568	None
1	167854037	G	0	A	11	AF=0.75	0/1/1/1	4	0.000976562	0.0765626	ADCY10
1	167913146	G	0	A	11	AF=0.75	0/1/1/1	4	0.000976562	0.0765626	DCAF6
1	168014204	T	66	A	213	AF=0.75	0/1/1/1	4	3.23697e-19	0.629144	DCAF6
1	168170018	T	146	A	51	AF=0.25	0/1/1/1	4	8.31318e-12	0.805026	TIPRL
1	168207943	A	0	T	10	AF=0.75	0/1/1/1	4	0.00195312	0.0760412	SFT2D2, TBX19
1	168212234	G	105	A	46	AF=0.25	0/1/1/1	4	1.76522e-06	0.132288	TBX19
1	168215499	C	40	A	12	AF=0.25	0/1/1/1	4	0.000127539	0.87312	ANKRD36BP1, TBX19
1	168215505	A	39	G	9	AF=0.25	0/1/1/1	4	1.52218e-05	0.40472	ANKRD36BP1, TBX19
1	168215575	G	131	A	45	AF=0.25	0/1/1/1	4	6.14082e-11	0.861912	ANKRD36BP1, TBX19
1	168220052	A	111	G	41	AF=0.25	0/1/1/1	4	1.21622e-08	0.574508	DQ576756, TBX19
1	168221986	G	81	T	19	AF=0.25	0/1/1/1	4	2.70276e-10	0.203318	TBX19
1	168256706	A	0	C	11	AF=0.75	0/1/1/1	4	0.000976562	0.0765626	TBX19
1	169337376	C	37	T	19	AF=0.25	0/1/1/1	4	0.0222414	0.124578	BLZF1
1	169350309	G	14	A	3	AF=0.25	0/1/1/1	4	0.0127258	0.587712	BLZF1
1	169356833	G	73	T	23	AF=0.25	0/1/1/1	4	3.11023e-07	0.906321	BLZF1
1	169456046	A	31	G	12	AF=0.25	0/1/1/1	4	0.00540157	0.724482	None
1	169457028	A	13	G	3	AF=0.25	0/1/1/1	4	0.0212708	0.774801	None
1	169460406	A	13	G	4	AF=0.25	0/1/1/1	4	0.0490417	1	None
1	169762807	T	41	G	11	AF=0.25	0/1/1/1	4	3.58879e-05	0.631596	C1orf112, METTL18
1	169840546	C	32	T	9	AF=0.25	0/1/1/1	4	0.000430857	0.722279	SCYL3
1	170503928	G	14	A	4	AF=0.25	0/1/1/1	4	0.0308838	1	GORAB
1	170513402	A	9	G	41	AF=0.75	0/1/1/1	4	5.6141e-06	0.326767	GORAB
1	171483717	A	139	C	48	AF=0.25	0/1/1/1	4	1.85041e-11	0.86587	PRRC2C
1	171498366	T	3	C	26	AF=0.75	0/1/1/1	4	1.52364e-05	0.0845378	PRRC2C
1	171671463	T	10	G	25	AF=0.75	0/1/1/1	4	0.0166738	0.695958	VAMP4
1	171753039	A	55	G	214	AF=0.75	0/1/1/1	4	2.54516e-23	0.0909257	METTL13
1	171757477	T	0	G	11	AF=0.75	0/1/1/1	4	0.000976562	0.0765626	METTL13
1	171766696	A	23	G	102	AF=0.75	0/1/1/1	4	4.5664e-13	0.0981458	AK094818, METTL13
1	172363524	C	19	T	6	AF=0.25	0/1/1/1	4	0.0146333	1	DNM3, PIGC
1	172368967	T	6	C	26	AF=0.75	0/1/1/1	4	0.000535053	0.541213	DNM3, PIGC
1	173429497	T	25	C	7	AF=0.25	0/1/1/1	4	0.0021024	0.838959	BC136808, LOC100506023
1	173448495	A	56	G	18	AF=0.25	0/1/1/1	4	1.10911e-05	1	PRDX6
1	173448500	A	56	G	15	AF=0.25	0/1/1/1	4	1.0414e-06	0.496238	PRDX6
1	173449036	G	63	A	14	AF=0.25	0/1/1/1	4	1.41407e-08	0.189	PRDX6
1	173774831	T	0	A	11	AF=0.75	0/1/1/1	4	0.000976562	0.0765626	CENPL
1	173832336	C	31	T	14	AF=0.25	0/1/1/1	4	0.0160944	0.38845	None
1	173832647	A	54	T	19	AF=0.25	0/1/1/1	4	5.06227e-05	0.892456	GAS5-AS1
1	173855298	A	15	T	5	AF=0.25	0/1/1/1	4	0.0413895	1	ZBTB37
1	173867252	T	26	G	5	AF=0.25	0/1/1/1	4	0.000192195	0.30486	None
1	173904884	G	58	T	20	AF=0.25	0/1/1/1	4	1.95191e-05	0.896159	RC3H1
1	174131013	C	0	T	10	AF=0.75	0/1/1/1	4	0.00195312	0.0760412	RABGAP1L
1	174787724	G	0	A	11	AF=0.75	0/1/1/1	4	0.000976562	0.0765626	RABGAP1L
1	174961501	C	14	T	58	AF=0.75	0/1/1/1	4	1.64643e-07	0.340566	RABGAP1L
1	174974939	G	4	A	15	AF=0.75	0/1/1/1	4	0.0192108	1	CACYBP
1	174983633	T	134	C	47	AF=0.25	0/1/1/1	4	7.00808e-11	0.796768	MRPS14
1	174984205	T	27	C	6	AF=0.25	0/1/1/1	4	0.000324063	0.427686	MRPS14
1	174988016	C	0	T	10	AF=0.75	0/1/1/1	4	0.00195312	0.0760412	MRPS14
1	175087729	T	0	C	11	AF=0.75	0/1/1/1	4	0.000976562	0.0765626	TNN
1	176041727	T	0	A	10	AF=0.75	0/1/1/1	4	0.00195312	0.0760412	RFWD2
1	179043539	T	211	G	79	AF=0.25	0/1/1/1	4	4.81059e-15	0.378314	FAM20B
1	179072728	T	16	C	43	AF=0.75	0/1/1/1	4	0.000584365	0.763544	ABL2
1	179075719	A	17	T	58	AF=0.75	0/1/1/1	4	2.18233e-06	0.691468	ABL2
1	179327591	A	39	T	18	AF=0.25	0/1/1/1	4	0.00750818	0.283319	SOAT1
1	179811138	C	49	T	13	AF=0.25	0/1/1/1	4	4.81752e-06	0.557948	TOR1AIP2
1	179814457	A	26	C	9	AF=0.25	0/1/1/1	4	0.00598812	1	TOR1AIP2
1	179831963	T	284	C	99	AF=0.25	0/1/1/1	4	8.17939e-22	0.7233	TOR1AIP2
1	179887788	C	54	T	118	AF=0.75	0/1/1/1	4	1.18722e-06	0.0638819	TOR1AIP1
1	179890933	C	20	G	7	AF=0.25	0/1/1/1	4	0.0191573	1	None
1	179972726	C	0	T	10	AF=0.75	0/1/1/1	4	0.00195312	0.0760412	CEP350
1	179989742	G	24	C	59	AF=0.75	0/1/1/1	4	0.000154559	0.446538	CEP350
1	180081856	T	133	A	32	AF=0.25	0/1/1/1	4	7.75804e-16	0.105471	CEP350
1	180164136	G	0	T	10	AF=0.75	0/1/1/1	4	0.00195312	0.0760412	QSOX1
1	180243524	A	2	G	22	AF=0.75	0/1/1/1	4	3.5882e-05	0.0611394	LHX4, LOC100527964
1	180246451	G	4	A	21	AF=0.75	0/1/1/1	4	0.000910521	0.363179	None
1	180919151	T	23	C	6	AF=0.25	0/1/1/1	4	0.0023157	0.674301	AK056657, KIAA1614
1	180943529	C	45	T	20	AF=0.25	0/1/1/1	4	0.00262638	0.315238	AK056657, STX6
1	180950126	C	0	T	10	AF=0.75	0/1/1/1	4	0.00195312	0.0760412	STX6
1	181058313	G	221	A	62	AF=0.25	0/1/1/1	4	4.21546e-22	0.243649	IER5
1	181089303	C	0	T	10	AF=0.75	0/1/1/1	4	0.00195312	0.0760412	None
1	182352621	T	2007	C	5744	AF=0.75	0/1/1/1	4	0	0.0702957	GLUL
1	182353198	A	409	T	1282	AF=0.75	0/1/1/1	4	1.15973e-104	0.448478	GLUL
1	182355046	A	42	G	122	AF=0.75	0/1/1/1	4	3.05246e-10	0.85701	GLUL
1	182359578	A	42	C	98	AF=0.75	0/1/1/1	4	2.49154e-06	0.172528	GLUL
1	182360315	C	19	T	68	AF=0.75	0/1/1/1	4	1.23516e-07	0.538364	GLUL
1	182360632	A	14	G	31	AF=0.75	0/1/1/1	4	0.0160944	0.38845	GLUL
1	183521283	C	160	T	42	AF=0.25	0/1/1/1	4	2.02764e-17	0.193261	SMG7
1	183521347	C	76	T	38	AF=0.25	0/1/1/1	4	0.000475185	0.0507409	SMG7
1	183596136	A	424	G	143	AF=0.25	0/1/1/1	4	2.79018e-33	0.922734	ARPC5
1	184672098	G	45	A	154	AF=0.75	0/1/1/1	4	3.72501e-15	0.462369	EDEM3
1	184765072	A	36	G	112	AF=0.75	0/1/1/1	4	2.84149e-10	0.924453	FAM129A
1	184938385	C	0	T	10	AF=0.75	0/1/1/1	4	0.00195312	0.0760412	FAM129A
1	185088697	T	128	C	37	AF=0.25	0/1/1/1	4	6.0951e-13	0.473335	TRMT1L
1	185272483	C	28	T	8	AF=0.25	0/1/1/1	4	0.00119324	0.847979	IVNS1ABP
1	186951429	A	0	G	10	AF=0.75	0/1/1/1	4	0.00195312	0.0760412	PLA2G4A
1	187377575	G	15	T	3	AF=0.25	0/1/1/1	4	0.00753784	0.588238	None
1	193010419	T	2	A	12	AF=0.75	0/1/1/1	4	0.0129395	0.539593	UCHL5
1	193018534	T	2	C	19	AF=0.75	0/1/1/1	4	0.000221252	0.13067	UCHL5
1	193027997	G	11	A	39	AF=0.75	0/1/1/1	4	9.02149e-05	0.744582	UCHL5
1	193054485	T	23	C	89	AF=0.75	0/1/1/1	4	2.37956e-10	0.325906	TROVE2
1	193057207	A	5	G	32	AF=0.75	0/1/1/1	4	7.42753e-06	0.128796	TROVE2
1	193074651	T	3	A	15	AF=0.75	0/1/1/1	4	0.00753784	0.588238	GLRX2
1	193087507	C	3	T	18	AF=0.75	0/1/1/1	4	0.00148964	0.321596	None
1	193244426	A	0	G	10	AF=0.75	0/1/1/1	4	0.00195312	0.0760412	None
1	194625395	C	0	T	11	AF=0.75	0/1/1/1	4	0.000976562	0.0765626	None
1	194640303	G	0	C	10	AF=0.75	0/1/1/1	4	0.00195312	0.0760412	None
1	196243059	C	0	T	10	AF=0.75	0/1/1/1	4	0.00195312	0.0760412	KCNT2
1	196472985	T	0	G	11	AF=0.75	0/1/1/1	4	0.000976562	0.0765626	KCNT2
1	196659753	T	0	C	11	AF=0.75	0/1/1/1	4	0.000976562	0.0765626	CFH, CFHR4
1	196667729	A	4	T	15	AF=0.75	0/1/1/1	4	0.0192108	1	CFH, CFHR4
1	196669581	C	0	T	10	AF=0.75	0/1/1/1	4	0.00195312	0.0760412	CFH, CFHR4
1	196671981	T	1	C	14	AF=0.75	0/1/1/1	4	0.000976562	0.136801	CFH, CFHR4
1	196682346	G	0	A	10	AF=0.75	0/1/1/1	4	0.00195312	0.0760412	CFH, CFHR4
1	196682947	G	39	A	101	AF=0.75	0/1/1/1	4	1.60656e-07	0.435458	CFH, CFHR4
1	196880607	C	0	T	10	AF=0.75	0/1/1/1	4	0.00195312	0.0760412	CFHR4
1	196880611	G	0	A	10	AF=0.75	0/1/1/1	4	0.00195312	0.0760412	CFHR4
1	197070442	G	54	T	146	AF=0.75	0/1/1/1	4	5.67428e-11	0.513935	ASPM
1	197070521	C	266	G	85	AF=0.25	0/1/1/1	4	7.65849e-23	0.758362	ASPM
1	197072420	T	31	C	85	AF=0.75	0/1/1/1	4	5.44461e-07	0.668412	ASPM
1	197073932	T	29	C	64	AF=0.75	0/1/1/1	4	0.000365796	0.187087	ASPM
1	197123043	T	5	C	34	AF=0.75	0/1/1/1	4	2.42991e-06	0.0950817	ZBTB41
1	197958740	T	3	C	18	AF=0.75	0/1/1/1	4	0.00148964	0.321596	None
1	197961957	C	30	A	127	AF=0.75	0/1/1/1	4	2.0911e-15	0.0969166	None
1	197962402	C	32	T	125	AF=0.75	0/1/1/1	4	3.45955e-14	0.197428	None
1	197962437	T	31	A	126	AF=0.75	0/1/1/1	4	8.67427e-15	0.14041	None
1	197962470	T	39	C	134	AF=0.75	0/1/1/1	4	2.12288e-13	0.483707	None
1	201767474	C	0	G	11	AF=0.75	0/1/1/1	4	0.000976562	0.0765626	NAV1
1	201790270	A	24	G	5	AF=0.25	0/1/1/1	4	0.000546113	0.397994	NAV1
1	201828755	T	46	C	9	AF=0.25	0/1/1/1	4	4.33638e-07	0.161732	IPO9
1	201830247	T	1	C	15	AF=0.75	0/1/1/1	4	0.000518799	0.143034	IPO9
1	201845575	C	75	A	191	AF=0.75	0/1/1/1	4	7.6796e-13	0.229082	IPO9
1	201959455	G	7	T	31	AF=0.75	0/1/1/1	4	0.000116167	0.4541	RNPEP
1	201960079	T	17	C	64	AF=0.75	0/1/1/1	4	1.42664e-07	0.443999	RNPEP
1	201960453	G	11	A	28	AF=0.75	0/1/1/1	4	0.0094753	0.711271	RNPEP
1	201961711	G	49	A	15	AF=0.25	0/1/1/1	4	2.43646e-05	0.885483	RNPEP
1	202129895	G	10	A	43	AF=0.75	0/1/1/1	4	5.55052e-06	0.34463	PTPN7
1	202135137	G	23	C	41	AF=0.75	0/1/1/1	4	0.0327658	0.0590309	None
1	202135245	C	34	T	6	AF=0.25	0/1/1/1	4	8.36458e-06	0.199456	None
1	202136988	G	19	A	72	AF=0.75	0/1/1/1	4	1.96713e-08	0.398998	None
1	202138934	A	40	T	117	AF=0.75	0/1/1/1	4	5.94825e-10	0.926562	PTPRVP
1	202140315	A	37	C	80	AF=0.75	0/1/1/1	4	8.71744e-05	0.1088	PTPRVP
1	202140400	A	36	G	86	AF=0.75	0/1/1/1	4	6.90955e-06	0.250865	PTPRVP
1	202301291	A	39	G	14	AF=0.25	0/1/1/1	4	0.000802331	0.873913	UBE2T
1	202554937	T	33	C	17	AF=0.25	0/1/1/1	4	0.0328391	0.143563	PPP1R12B
1	202556304	C	2	G	23	AF=0.75	0/1/1/1	4	1.94311e-05	0.0617784	PPP1R12B
1	202849723	G	45	A	19	AF=0.25	0/1/1/1	4	0.00156279	0.387607	RABIF
1	202888947	T	39	C	122	AF=0.75	0/1/1/1	4	3.74981e-11	0.856135	KLHL12
1	203652040	T	91	C	38	AF=0.25	0/1/1/1	4	3.46449e-06	0.262959	ATP2B4
1	203766827	T	27	C	66	AF=0.75	0/1/1/1	4	6.46705e-05	0.401487	ZBED6, ZC3H11A
1	203772801	A	6	G	37	AF=0.75	0/1/1/1	4	1.63612e-06	0.112534	ZC3H11A
1	203781233	C	4	T	22	AF=0.75	0/1/1/1	4	0.000533521	0.364811	ZC3H11A
1	203782423	C	0	T	10	AF=0.75	0/1/1/1	4	0.00195312	0.0760412	ZC3H11A
1	203835838	A	0	G	10	AF=0.75	0/1/1/1	4	0.00195312	0.0760412	SNRPE
1	203836996	C	8	T	23	AF=0.75	0/1/1/1	4	0.0106738	1	SNRPE
1	204379452	T	138	C	61	AF=0.25	0/1/1/1	4	4.91587e-08	0.0714992	AK316092, PPP1R15B
1	204516947	C	0	G	10	AF=0.75	0/1/1/1	4	0.00195312	0.0760412	MDM4
1	204517097	G	0	A	10	AF=0.75	0/1/1/1	4	0.00195312	0.0760412	MDM4
1	204518842	C	14	A	73	AF=0.75	0/1/1/1	4	8.58449e-11	0.0625158	MDM4
1	204522457	T	27	C	115	AF=0.75	0/1/1/1	4	3.94091e-14	0.120343	MDM4
1	205055949	G	83	A	28	AF=0.25	0/1/1/1	4	1.6752e-07	1	RBBP5
1	205091105	G	24	C	11	AF=0.25	0/1/1/1	4	0.0409596	0.433903	RBBP5
1	205113595	A	47	C	24	AF=0.25	0/1/1/1	4	0.00855454	0.0992588	DSTYK
1	205113596	G	47	A	25	AF=0.25	0/1/1/1	4	0.0127746	0.0754335	DSTYK
1	205737739	G	6	A	32	AF=0.75	0/1/1/1	4	2.43426e-05	0.259849	RAB7L1
1	205744138	G	23	T	8	AF=0.25	0/1/1/1	4	0.0106738	1	RAB7L1
1	205759195	G	59	A	31	AF=0.25	0/1/1/1	4	0.00416511	0.050419	SLC41A1
1	205767885	G	63	A	17	AF=0.25	0/1/1/1	4	2.26614e-07	0.518907	SLC41A1
1	205779231	G	44	A	93	AF=0.75	0/1/1/1	4	3.43932e-05	0.0605754	SLC41A1
1	206603535	G	58	A	18	AF=0.25	0/1/1/1	4	4.71324e-06	0.894819	SRGAP2
1	206629674	A	3	G	12	AF=0.75	0/1/1/1	4	0.0351562	1	SRGAP2
1	206637133	C	42	T	14	AF=0.25	0/1/1/1	4	0.000234446	1	SRGAP2
1	206647787	T	17	C	73	AF=0.75	0/1/1/1	4	1.94824e-09	0.222848	IKBKE
1	206760474	T	82	C	200	AF=0.75	0/1/1/1	4	1.5293e-12	0.114116	RASSF5
1	206760686	T	51	A	147	AF=0.75	0/1/1/1	4	5.57949e-12	0.805674	RASSF5
1	206760694	T	47	C	143	AF=0.75	0/1/1/1	4	1.82585e-12	1	RASSF5
1	206767938	G	38	A	91	AF=0.75	0/1/1/1	4	3.46449e-06	0.262959	EIF2D
1	206768373	A	34	G	75	AF=0.75	0/1/1/1	4	0.000107301	0.149885	EIF2D
1	206772753	A	1	G	11	AF=0.75	0/1/1/1	4	0.00634766	0.316025	EIF2D
1	206825643	A	101	G	22	AF=0.25	0/1/1/1	4	2.73831e-13	0.0762597	DYRK3
1	207249855	G	18	A	50	AF=0.75	0/1/1/1	4	0.000130839	0.779868	PFKFB2
1	207250570	A	8	G	49	AF=0.75	0/1/1/1	4	2.71685e-08	0.0652634	PFKFB2
1	207501866	C	32	G	11	AF=0.25	0/1/1/1	4	0.00191396	1	CD55
1	207529576	T	1	G	11	AF=0.75	0/1/1/1	4	0.00634766	0.316025	CD55
1	207837177	C	20	T	7	AF=0.25	0/1/1/1	4	0.0191573	1	CR1L
1	207899976	C	40	T	9	AF=0.25	0/1/1/1	4	9.26355e-06	0.325743	None
1	207940853	T	199	A	57	AF=0.25	0/1/1/1	4	1.29222e-19	0.348082	CD46
1	207949017	T	11	C	45	AF=0.75	0/1/1/1	4	5.37832e-06	0.440601	CD46
1	207957555	T	48	C	10	AF=0.25	0/1/1/1	4	4.51662e-07	0.224085	CD46
1	209788703	T	0	C	11	AF=0.75	0/1/1/1	4	0.000976562	0.0765626	LAMB3
1	210010524	G	57	A	191	AF=0.75	0/1/1/1	4	4.34152e-18	0.509397	DIEXF
1	211431105	A	0	C	10	AF=0.75	0/1/1/1	4	0.00195312	0.0760412	None
1	211432029	G	0	A	10	AF=0.75	0/1/1/1	4	0.00195312	0.0760412	None
1	211839499	G	45	A	9	AF=0.25	0/1/1/1	4	7.28843e-07	0.207458	NEK2
1	211840278	T	0	C	10	AF=0.75	0/1/1/1	4	0.00195312	0.0760412	NEK2
1	211840498	T	140	C	49	AF=0.25	0/1/1/1	4	2.41279e-11	0.801025	NEK2
1	211847646	G	93	C	292	AF=0.75	0/1/1/1	4	4.86392e-25	0.72443	NEK2
1	211920314	T	55	C	12	AF=0.25	0/1/1/1	4	1.02732e-07	0.205374	LPGAT1
1	212126023	G	196	T	68	AF=0.25	0/1/1/1	4	1.47942e-15	0.77632	INTS7
1	212782500	T	0	C	10	AF=0.75	0/1/1/1	4	0.00195312	0.0760412	ATF3
1	212786163	T	0	C	10	AF=0.75	0/1/1/1	4	0.00195312	0.0760412	ATF3
1	212790959	T	0	A	10	AF=0.75	0/1/1/1	4	0.00195312	0.0760412	ATF3
1	212792903	C	34	T	116	AF=0.75	0/1/1/1	4	1.11985e-11	0.5718	ATF3
1	212980837	T	46	C	8	AF=0.25	0/1/1/1	4	1.38434e-07	0.114215	TATDN3
1	212988804	G	78	A	20	AF=0.25	0/1/1/1	4	2.87209e-09	0.350602	TATDN3
1	213031408	T	59	C	15	AF=0.25	0/1/1/1	4	2.55342e-07	0.420677	FLVCR1-AS1
1	213069258	T	10	A	44	AF=0.75	0/1/1/1	4	3.38569e-06	0.345504	FLVCR1
1	213069420	C	10	T	45	AF=0.75	0/1/1/1	4	2.05726e-06	0.278279	FLVCR1
1	213069523	A	28	G	8	AF=0.25	0/1/1/1	4	0.00119324	0.847979	FLVCR1
1	214814571	C	58	T	194	AF=0.75	0/1/1/1	4	2.56456e-18	0.512778	CENPF
1	214826196	G	351	A	102	AF=0.25	0/1/1/1	4	4.6371e-33	0.232874	CENPF
1	214828350	T	53	C	10	AF=0.25	0/1/1/1	4	3.38217e-08	0.109151	CENPF
1	214830617	A	340	G	136	AF=0.25	0/1/1/1	4	3.26242e-21	0.0805001	CENPF
1	214841093	C	23	T	8	AF=0.25	0/1/1/1	4	0.0106738	1	None
1	215238904	C	0	T	10	AF=0.75	0/1/1/1	4	0.00195312	0.0760412	KCNK2
1	215238957	G	0	A	10	AF=0.75	0/1/1/1	4	0.00195312	0.0760412	KCNK2
1	219428807	T	0	C	11	AF=0.75	0/1/1/1	4	0.000976562	0.0765626	None
1	220321023	A	221	G	581	AF=0.75	0/1/1/1	4	4.27307e-38	0.0947048	IARS2
1	220373479	T	0	A	11	AF=0.75	0/1/1/1	4	0.000976562	0.0765626	RAB3GAP2
1	220444925	G	3	A	12	AF=0.75	0/1/1/1	4	0.0351562	1	RAB3GAP2
1	221912361	T	25	C	5	AF=0.25	0/1/1/1	4	0.000324914	0.399191	DUSP10
1	223933079	C	371	T	101	AF=0.25	0/1/1/1	4	2.6841e-37	0.0708987	CAPN2
1	223945582	G	32	T	16	AF=0.25	0/1/1/1	4	0.0293049	0.184322	CAPN2
1	223958547	A	20	G	4	AF=0.25	0/1/1/1	4	0.00154388	0.480444	CAPN2
1	223963468	T	123	C	55	AF=0.25	0/1/1/1	4	3.73584e-07	0.0828753	CAPN2
1	223967953	C	200	T	79	AF=0.25	0/1/1/1	4	2.85989e-13	0.213141	TP53BP2
1	224051548	G	7	A	19	AF=0.75	0/1/1/1	4	0.0289593	0.821751	None
1	224051926	T	4	C	16	AF=0.75	0/1/1/1	4	0.0118179	0.797669	None
1	224564374	C	47	T	9	AF=0.25	0/1/1/1	4	2.57157e-07	0.163373	CNIH4
1	224628508	A	0	T	10	AF=0.75	0/1/1/1	4	0.00195312	0.0760412	None
1	225156832	A	41	G	9	AF=0.25	0/1/1/1	4	5.6141e-06	0.326767	DNAH14
1	226029557	A	36	G	18	AF=0.25	0/1/1/1	4	0.0198343	0.159045	EPHX1
1	226032229	C	66	T	23	AF=0.25	0/1/1/1	4	5.69025e-06	0.902554	EPHX1
1	226040687	A	2	C	18	AF=0.75	0/1/1/1	4	0.000402451	0.193072	TMEM63A
1	226055595	G	157	A	46	AF=0.25	0/1/1/1	4	2.20036e-15	0.466799	TMEM63A
1	226108200	C	487	T	167	AF=0.25	0/1/1/1	4	3.38324e-37	0.752003	LEFTY1, PYCR2
1	226257722	A	70	G	30	AF=0.25	0/1/1/1	4	7.85014e-05	0.249071	H3F3A, H3F3AP4
1	226352498	T	258	G	87	AF=0.25	0/1/1/1	4	8.45527e-21	0.950426	ACBD3
1	226419166	G	42	C	7	AF=0.25	0/1/1/1	4	3.62458e-07	0.0982934	LIN9
1	227058344	A	17	G	35	AF=0.75	0/1/1/1	4	0.0175332	0.201905	PSEN2
1	227062129	C	0	A	11	AF=0.75	0/1/1/1	4	0.000976562	0.0765626	PSEN2
1	227069737	C	63	T	15	AF=0.25	0/1/1/1	4	3.74866e-08	0.295154	PSEN2
1	227072001	C	0	T	10	AF=0.75	0/1/1/1	4	0.00195312	0.0760412	PSEN2
1	227085155	G	14	A	4	AF=0.25	0/1/1/1	4	0.0308838	1	ADCK3, CABC1
1	227797950	A	0	G	10	AF=0.75	0/1/1/1	4	0.00195312	0.0760412	ZNF678
1	227865316	C	0	T	10	AF=0.75	0/1/1/1	4	0.00195312	0.0760412	ZNF678
1	227920061	T	71	G	184	AF=0.75	0/1/1/1	4	9.84085e-13	0.31116	JMJD4, LOC100130093, SNAP47
1	227925717	G	0	T	11	AF=0.75	0/1/1/1	4	0.000976562	0.0765626	SNAP47
1	227961789	C	13	G	33	AF=0.75	0/1/1/1	4	0.00453386	0.6106	SNAP47
1	228277048	G	7	A	24	AF=0.75	0/1/1/1	4	0.00332689	1	ARF1
1	228282877	A	0	C	10	AF=0.75	0/1/1/1	4	0.00195312	0.0760412	ARF1
1	228334436	G	67	A	32	AF=0.25	0/1/1/1	4	0.000562208	0.103624	GUK1
1	228362682	G	60	A	23	AF=0.25	0/1/1/1	4	5.9736e-05	0.611951	IBA57
1	228371754	C	22	T	8	AF=0.25	0/1/1/1	4	0.0161248	0.833764	None
1	228413382	G	0	A	10	AF=0.75	0/1/1/1	4	0.00195312	0.0760412	OBSCN
1	228413386	C	0	T	10	AF=0.75	0/1/1/1	4	0.00195312	0.0760412	OBSCN
1	228440468	T	3	G	19	AF=0.75	0/1/1/1	4	0.000855446	0.32392	OBSCN
1	228645063	A	779	G	294	AF=0.25	0/1/1/1	4	3.70175e-51	0.0721663	None
1	228681749	C	556	T	193	AF=0.25	0/1/1/1	4	1.40879e-41	0.642547	RNF187
1	228682330	C	392	G	117	AF=0.25	0/1/1/1	4	1.06186e-35	0.306318	RNF187
1	228682535	G	104	A	291	AF=0.75	0/1/1/1	4	1.36024e-21	0.561186	RNF187
1	229399480	G	27	A	10	AF=0.25	0/1/1/1	4	0.00763208	0.849336	None
1	229795330	T	26	C	85	AF=0.75	0/1/1/1	4	1.69863e-08	0.743661	URB2
1	229802996	C	0	T	10	AF=0.75	0/1/1/1	4	0.00195312	0.0760412	None
1	229823966	G	0	A	11	AF=0.75	0/1/1/1	4	0.000976562	0.0765626	None
1	230395886	A	0	G	11	AF=0.75	0/1/1/1	4	0.000976562	0.0765626	GALNT2
1	230416038	G	115	A	388	AF=0.75	0/1/1/1	4	1.26655e-35	0.279883	GALNT2
1	230416399	G	187	T	616	AF=0.75	0/1/1/1	4	3.33448e-54	0.271405	GALNT2
1	230416832	T	81	A	292	AF=0.75	0/1/1/1	4	4.20794e-29	0.151367	GALNT2
1	230417664	C	37	G	98	AF=0.75	0/1/1/1	4	1.50209e-07	0.550806	GALNT2
1	230418429	G	3	A	21	AF=0.75	0/1/1/1	4	0.000277162	0.236337	None
1	231113963	G	2	A	23	AF=0.75	0/1/1/1	4	1.94311e-05	0.0617784	TTC13
1	231133827	C	5	A	20	AF=0.75	0/1/1/1	4	0.00407732	0.651772	ARV1
1	231377081	C	24	T	46	AF=0.75	0/1/1/1	4	0.0115264	0.0961986	GNPAT
1	231383173	G	0	C	11	AF=0.75	0/1/1/1	4	0.000976562	0.0765626	GNPAT
1	231400260	C	1	T	12	AF=0.75	0/1/1/1	4	0.00341797	0.206918	GNPAT
1	231400905	A	0	G	11	AF=0.75	0/1/1/1	4	0.000976562	0.0765626	GNPAT
1	231403830	C	0	T	10	AF=0.75	0/1/1/1	4	0.00195312	0.0760412	GNPAT
1	231488085	G	4	C	26	AF=0.75	0/1/1/1	4	5.94761e-05	0.203598	SPRTN
1	231489539	A	18	G	56	AF=0.75	0/1/1/1	4	1.10911e-05	1	SPRTN
1	231542157	G	0	C	11	AF=0.75	0/1/1/1	4	0.000976562	0.0765626	EGLN1
1	233802856	C	0	G	11	AF=0.75	0/1/1/1	4	0.000976562	0.0765626	KCNK1
1	234509259	G	867	C	312	AF=0.25	0/1/1/1	4	7.51552e-61	0.252828	COA6
1	234529552	C	201	T	69	AF=0.25	0/1/1/1	4	3.91265e-16	0.833113	TARBP1
1	234529570	G	171	A	43	AF=0.25	0/1/1/1	4	2.9058e-19	0.11394	TARBP1
1	234546014	G	2	A	16	AF=0.75	0/1/1/1	4	0.00131226	0.27429	TARBP1
1	234607419	T	3	C	12	AF=0.75	0/1/1/1	4	0.0351562	1	TARBP1
1	234611015	C	3	T	18	AF=0.75	0/1/1/1	4	0.00148964	0.321596	TARBP1
1	234614390	G	23	C	6	AF=0.25	0/1/1/1	4	0.0023157	0.674301	TARBP1
1	235272357	C	0	T	11	AF=0.75	0/1/1/1	4	0.000976562	0.0765626	None
1	235392546	T	69	C	28	AF=0.25	0/1/1/1	4	3.80379e-05	0.411398	ARID4B
1	235492546	T	134	G	46	AF=0.25	0/1/1/1	4	3.59996e-11	0.863437	GGPS1
1	235506853	G	66	A	28	AF=0.25	0/1/1/1	4	0.000111121	0.284649	GGPS1
1	236380913	T	5	C	30	AF=0.75	0/1/1/1	4	2.23615e-05	0.173192	ERO1LB
1	236381349	C	5	G	20	AF=0.75	0/1/1/1	4	0.00407732	0.651772	ERO1LB
1	236645670	C	126	T	34	AF=0.25	0/1/1/1	4	1.2521e-13	0.315134	EDARADD
1	236647511	T	34	C	126	AF=0.75	0/1/1/1	4	1.2521e-13	0.315134	EDARADD
1	236647550	C	21	G	82	AF=0.75	0/1/1/1	4	1.06968e-09	0.307364	EDARADD
1	236647736	C	40	T	152	AF=0.75	0/1/1/1	4	1.42594e-16	0.210947	EDARADD
1	237056002	A	5	T	32	AF=0.75	0/1/1/1	4	7.42753e-06	0.128796	MTR
1	237062198	A	207	C	63	AF=0.25	0/1/1/1	4	4.36728e-19	0.574098	MTR
1	237062305	A	236	G	65	AF=0.25	0/1/1/1	4	5.993e-24	0.183331	MTR
1	237064626	T	86	G	33	AF=0.25	0/1/1/1	4	1.26676e-06	0.525132	MTR
1	241794056	C	41	A	104	AF=0.75	0/1/1/1	4	1.69678e-07	0.387814	CHML, OPN3
1	241800324	G	3	A	17	AF=0.75	0/1/1/1	4	0.00257683	0.439374	OPN3
1	241801595	C	3	T	14	AF=0.75	0/1/1/1	4	0.0127258	0.587712	OPN3
1	242011534	A	172	G	74	AF=0.25	0/1/1/1	4	3.67381e-10	0.0768262	EXO1
1	242012033	G	387	A	131	AF=0.25	0/1/1/1	4	2.32637e-30	0.879058	EXO1
1	242072965	G	0	A	10	AF=0.75	0/1/1/1	4	0.00195312	0.0760412	None
1	242073301	T	1	C	12	AF=0.75	0/1/1/1	4	0.00341797	0.206918	None
1	244553794	C	40	G	11	AF=0.25	0/1/1/1	4	5.70381e-05	0.631444	None
1	244871041	T	283	A	101	AF=0.25	0/1/1/1	4	4.47155e-21	0.555838	DESI2
1	244997953	A	14	G	4	AF=0.25	0/1/1/1	4	0.0308838	1	None
1	245018624	C	31	A	9	AF=0.25	0/1/1/1	4	0.000679548	0.855636	HNRNPU
1	245021132	C	19	G	4	AF=0.25	0/1/1/1	4	0.00259948	0.479516	HNRNPU
1	245138717	T	13	G	3	AF=0.25	0/1/1/1	4	0.0212708	0.774801	EFCAB2
1	245247769	C	41	A	22	AF=0.25	0/1/1/1	4	0.022575	0.0800302	EFCAB2
1	245251020	G	94	T	25	AF=0.25	0/1/1/1	4	1.3417e-10	0.342238	EFCAB2
1	246121056	T	0	C	10	AF=0.75	0/1/1/1	4	0.00195312	0.0760412	SMYD3
1	246704634	C	2	T	15	AF=0.75	0/1/1/1	4	0.00234985	0.270784	TFB2M
1	246710579	C	1	T	13	AF=0.75	0/1/1/1	4	0.00183105	0.212637	TFB2M
1	246710598	A	1	C	13	AF=0.75	0/1/1/1	4	0.00183105	0.212637	TFB2M
1	246792813	G	0	T	10	AF=0.75	0/1/1/1	4	0.00195312	0.0760412	CNST
1	246796607	C	0	T	11	AF=0.75	0/1/1/1	4	0.000976562	0.0765626	CNST
1	246824323	T	6	G	18	AF=0.75	0/1/1/1	4	0.0226558	1	CNST
1	246826667	C	0	T	10	AF=0.75	0/1/1/1	4	0.00195312	0.0760412	CNST
1	246829616	T	30	C	86	AF=0.75	0/1/1/1	4	1.91827e-07	0.830416	CNST
1	246829873	G	42	A	95	AF=0.75	0/1/1/1	4	6.91978e-06	0.138456	CNST
1	246830293	A	34	G	101	AF=0.75	0/1/1/1	4	6.59881e-09	1	CNST
1	247069697	A	0	T	11	AF=0.75	0/1/1/1	4	0.000976562	0.0765626	AHCTF1
1	247092378	T	0	C	11	AF=0.75	0/1/1/1	4	0.000976562	0.0765626	AHCTF1
1	247351429	A	43	G	12	AF=0.25	0/1/1/1	4	3.30538e-05	0.643898	None
1	247352823	G	24	A	7	AF=0.25	0/1/1/1	4	0.00332689	1	None
1	247353180	A	98	G	38	AF=0.25	0/1/1/1	4	2.72986e-07	0.428802	None
1	247353783	T	416	C	134	AF=0.25	0/1/1/1	4	1.33123e-34	0.767723	None
1	247362329	A	36	G	7	AF=0.25	0/1/1/1	4	8.96304e-06	0.219851	None
1	247363833	T	133	A	46	AF=0.25	0/1/1/1	4	5.37976e-11	0.862933	None
1	247372009	T	39	A	10	AF=0.25	0/1/1/1	4	3.84591e-05	0.513742	None
1	247372163	G	30	T	8	AF=0.25	0/1/1/1	4	0.000471987	0.708804	None
1	247456347	T	7	G	20	AF=0.75	0/1/1/1	4	0.0191573	1	None
1	247470836	A	3	G	20	AF=0.75	0/1/1/1	4	0.000488281	0.23328	ZNF496
1	248023966	C	114	T	41	AF=0.25	0/1/1/1	4	3.79434e-09	0.710572	TRIM58
1	248039294	G	27	A	80	AF=0.75	0/1/1/1	4	2.87737e-07	1	TRIM58
1	248040104	C	1	T	10	AF=0.75	0/1/1/1	4	0.0117188	0.311724	TRIM58
1	248042937	C	43	T	8	AF=0.25	0/1/1/1	4	6.86712e-07	0.145931	TRIM58
1	248059476	A	16	C	35	AF=0.75	0/1/1/1	4	0.0109736	0.330954	OR2W3, TRIM58
2	904394	T	4	C	13	AF=0.667	0/1/1	3	0.0490417	0.453466	None
2	3383538	C	35	G	18	AF=0.333	0/0/1	3	0.0270083	0.885342	TRAPPC12
2	3392295	A	75	G	142	AF=0.667	0/1/1	3	6.3514e-06	0.718837	TRAPPC12
2	3590294	A	69	C	22	AF=0.333	0/0/1	3	8.1872e-07	0.0746334	None
2	3609134	A	72	C	41	AF=0.333	0/0/1	3	0.00455356	0.486846	LOC100506054
2	8993505	A	93	C	40	AF=0.333	0/0/1	3	4.95086e-06	0.462657	None
2	10044999	C	22	G	5	AF=0.333	0/0/1	3	0.00151372	0.150899	TAF1B
2	10076338	G	2	A	10	AF=0.667	0/1/1	3	0.0385742	0.358815	None
2	10135390	C	3	T	15	AF=0.667	0/1/1	3	0.00753784	0.209209	GRHL1
2	10142073	T	33	C	11	AF=0.333	0/0/1	3	0.00126003	0.267022	GRHL1
2	10288600	A	36	C	13	AF=0.333	0/0/1	3	0.00140269	0.364914	C2orf48
2	10290256	G	38	C	19	AF=0.333	0/0/1	3	0.0163481	1	C2orf48
2	10338860	G	13	A	28	AF=0.667	0/1/1	3	0.0275332	1	C2orf48
2	10347142	C	10	T	29	AF=0.667	0/1/1	3	0.00337785	0.395952	C2orf48
2	10347737	T	1	C	12	AF=0.667	0/1/1	3	0.00341797	0.0731862	C2orf48
2	10563165	G	121	A	282	AF=0.667	0/1/1	3	6.49878e-16	0.169601	HPCAL1
2	10582679	A	6	G	23	AF=0.667	0/1/1	3	0.0023157	0.171514	ODC1
2	10787967	C	1	T	12	AF=0.667	0/1/1	3	0.00341797	0.0731862	NOL10
2	10793932	G	18	A	5	AF=0.333	0/0/1	3	0.010622	0.276561	NOL10
2	11321880	C	54	T	27	AF=0.333	0/0/1	3	0.00359635	1	ROCK2
2	12417589	G	41	A	16	AF=0.333	0/0/1	3	0.00126356	0.482733	AK001558
2	12705114	G	3	A	14	AF=0.667	0/1/1	3	0.0127258	0.20607	AK001558
2	17845296	A	36	G	68	AF=0.667	0/1/1	3	0.00220943	0.756168	SMC6
2	17940114	C	5	T	22	AF=0.667	0/1/1	3	0.00151372	0.150899	GEN1, SMC6
2	20098208	T	103	C	58	AF=0.333	0/0/1	3	0.000486602	0.453152	TTC32
2	20110532	C	30	T	15	AF=0.333	0/0/1	3	0.0356978	1	WDR35
2	23973603	A	32	G	79	AF=0.667	0/1/1	3	9.45105e-06	0.364893	ATAD2B
2	24262060	G	66	A	27	AF=0.333	0/0/1	3	6.46705e-05	0.441499	C2orf44
2	24524958	C	33	T	14	AF=0.333	0/0/1	3	0.00794273	0.757121	ITSN2
2	24930262	C	67	T	35	AF=0.333	0/0/1	3	0.00199281	0.833981	NCOA1
2	25141538	A	153	G	79	AF=0.333	0/0/1	3	1.35215e-06	0.83452	ADCY3
2	25194741	G	8	A	23	AF=0.667	0/1/1	3	0.0106738	0.449088	DNAJC27
2	26334997	G	7	A	22	AF=0.667	0/1/1	3	0.00813006	0.331762	RAB10
2	26359315	G	164	A	93	AF=0.333	0/0/1	3	1.11915e-05	0.321706	RAB10
2	26411894	C	47	T	22	AF=0.333	0/0/1	3	0.00354481	0.898551	GAREML
2	26590084	T	26	G	81	AF=0.667	0/1/1	3	9.37451e-08	0.0511879	EPT1
2	26612465	G	81	A	35	AF=0.333	0/0/1	3	2.33224e-05	0.554544	EPT1
2	26617209	A	112	G	57	AF=0.333	0/0/1	3	2.80886e-05	0.934984	EPT1
2	27001973	C	92	T	163	AF=0.667	0/1/1	3	1.03178e-05	0.352608	SLC35F6
2	27003021	T	43	C	75	AF=0.667	0/1/1	3	0.0041237	0.494379	SLC35F6
2	27016351	G	3	A	15	AF=0.667	0/1/1	3	0.00753784	0.209209	CENPA
2	27260469	G	234	A	108	AF=0.333	0/0/1	3	8.10756e-12	0.528196	TMEM214
2	27280092	T	5	A	26	AF=0.667	0/1/1	3	0.000192195	0.0547235	AGBL5
2	27292651	T	25	C	44	AF=0.667	0/1/1	3	0.0294935	0.610745	AGBL5
2	27424636	G	381	A	174	AF=0.333	0/0/1	3	8.86396e-19	0.344442	SLC5A6
2	27435374	G	164	A	68	AF=0.333	0/0/1	3	2.49013e-10	0.210198	ATRAID
2	27460968	A	66	G	103	AF=0.667	0/1/1	3	0.00546132	0.120908	CAD
2	27462076	C	108	T	255	AF=0.667	0/1/1	3	7.7858e-15	0.163821	CAD
2	27542041	C	5	T	20	AF=0.667	0/1/1	3	0.00407732	0.203802	MPV17
2	27550967	A	66	G	123	AF=0.667	0/1/1	3	4.09003e-05	0.643698	GTF3C2
2	27590038	G	124	C	264	AF=0.667	0/1/1	3	9.72973e-13	0.590606	EIF2B4
2	27596395	C	1	A	11	AF=0.667	0/1/1	3	0.00634766	0.0728458	SNX17
2	27604279	A	260	G	574	AF=0.667	0/1/1	3	5.24973e-28	0.198609	PPM1G
2	27838058	C	160	A	83	AF=0.333	0/0/1	3	8.8833e-07	0.785599	ZNF512
2	27874886	G	10	A	35	AF=0.667	0/1/1	3	0.000247088	0.153429	SUPT7L
2	29152384	T	1	G	10	AF=0.667	0/1/1	3	0.0117188	0.113886	WDR43
2	29169612	T	708	C	396	AF=0.333	0/0/1	3	4.38327e-21	0.0737095	WDR43
2	30381505	T	79	C	141	AF=0.667	0/1/1	3	3.50155e-05	0.431444	YPEL5
2	32249176	G	331	A	686	AF=0.667	0/1/1	3	3.37096e-29	0.617962	DPY30, MEMO1
2	32381883	G	13	A	36	AF=0.667	0/1/1	3	0.00140269	0.364914	SPAST
2	32447718	C	68	T	29	AF=0.333	0/0/1	3	9.34069e-05	0.519234	SLC30A6
2	32582241	T	24	C	60	AF=0.667	0/1/1	3	0.000107148	0.417998	BIRC6
2	32590638	C	3	T	14	AF=0.667	0/1/1	3	0.0127258	0.20607	BIRC6
2	32718615	T	31	C	77	AF=0.667	0/1/1	3	1.11531e-05	0.358303	BIRC6
2	32774505	C	72	T	155	AF=0.667	0/1/1	3	3.74218e-08	0.672711	BIRC6
2	32983526	C	184	T	106	AF=0.333	0/0/1	3	5.42797e-06	0.237237	TTC27
2	33814331	G	19	C	55	AF=0.667	0/1/1	3	3.37681e-05	0.176539	FAM98A
2	36782886	G	72	A	136	AF=0.667	0/1/1	3	1.07749e-05	0.713087	FEZ2
2	37075013	T	65	A	42	AF=0.333	0/0/1	3	0.0329467	0.218025	STRN
2	37325108	T	127	C	51	AF=0.333	0/0/1	3	1.14505e-08	0.203522	None
2	37325780	A	60	G	95	AF=0.667	0/1/1	3	0.00613289	0.172407	None
2	37438993	G	156	A	357	AF=0.667	0/1/1	3	3.64667e-19	0.17434	CEBPZ
2	37480249	A	53	G	141	AF=0.667	0/1/1	3	2.06394e-10	0.0799676	PRKD3
2	37507344	T	2	C	11	AF=0.667	0/1/1	3	0.0224609	0.242342	PRKD3
2	37518045	G	26	C	79	AF=0.667	0/1/1	3	2.16585e-07	0.0777127	PRKD3
2	37791321	T	3	C	12	AF=0.667	0/1/1	3	0.0351562	0.412257	None
2	38827965	C	8	G	33	AF=0.667	0/1/1	3	0.000112221	0.06827	HNRPLL
2	38977371	C	20	T	8	AF=0.333	0/0/1	3	0.0356981	0.691405	SRSF7
2	39546744	T	3	A	14	AF=0.667	0/1/1	3	0.0127258	0.20607	MAP4K3
2	39963561	T	154	A	99	AF=0.333	0/0/1	3	0.000657009	0.0529761	THUMPD2
2	39963667	A	117	G	222	AF=0.667	0/1/1	3	1.24863e-08	0.644958	THUMPD2
2	42515437	A	124	G	76	AF=0.333	0/0/1	3	0.00084507	0.176647	EML4
2	42578149	A	980	G	462	AF=0.333	0/0/1	3	4.03019e-43	0.314639	COX7A2L
2	43452183	A	115	G	50	AF=0.333	0/0/1	3	4.51444e-07	0.457483	ZFP36L2
2	44547131	A	71	G	149	AF=0.667	0/1/1	3	1.56471e-07	0.775191	PREPL, SLC3A1
2	44547142	A	157	G	58	AF=0.333	0/0/1	3	1.00222e-11	0.0507383	PREPL, SLC3A1
2	44547574	G	79	A	120	AF=0.667	0/1/1	3	0.00445503	0.0599811	PREPL, SLC3A1
2	44547909	T	58	C	111	AF=0.667	0/1/1	3	5.56234e-05	0.806662	PREPL, SLC3A1
2	46987767	A	48	G	17	AF=0.333	0/0/1	3	0.000152107	0.238902	SOCS5
2	46989262	A	15	T	43	AF=0.667	0/1/1	3	0.000306947	0.26603	SOCS5
2	47130850	A	116	G	266	AF=0.667	0/1/1	3	1.12604e-14	0.232696	MCFD2
2	47648835	A	24	G	11	AF=0.333	0/0/1	3	0.0409596	1	MSH2
2	47708513	A	26	G	7	AF=0.333	0/0/1	3	0.00131873	0.194851	MSH2
2	47709098	G	47	T	13	AF=0.333	0/0/1	3	1.21467e-05	0.0561371	MSH2
2	47709117	C	47	G	13	AF=0.333	0/0/1	3	1.21467e-05	0.0561371	MSH2
2	48023115	T	276	C	133	AF=0.333	0/0/1	3	1.30526e-12	0.753249	MSH6
2	48030838	A	19	T	4	AF=0.333	0/0/1	3	0.00259948	0.123957	MSH6
2	55839855	C	1	T	9	AF=0.667	0/1/1	3	0.0214844	0.180663	SMEK2
2	55845287	G	79	A	179	AF=0.667	0/1/1	3	4.3383e-10	0.390672	None
2	55845843	C	30	T	9	AF=0.333	0/0/1	3	0.00106502	0.233642	None
2	55850106	C	4	G	19	AF=0.667	0/1/1	3	0.00259948	0.123957	None
2	56348757	T	3	C	14	AF=0.667	0/1/1	3	0.0127258	0.20607	BC043355, CCDC85A
2	58389182	A	22	T	49	AF=0.667	0/1/1	3	0.0018204	0.801289	FANCL
2	61154510	T	14	C	34	AF=0.667	0/1/1	3	0.0055152	0.646588	None
2	61245551	G	32	C	93	AF=0.667	0/1/1	3	4.36433e-08	0.0714911	PEX13
2	61404905	C	72	G	120	AF=0.667	0/1/1	3	0.00065503	0.221001	AHSA2
2	61417145	C	68	G	23	AF=0.333	0/0/1	3	2.52215e-06	0.119229	USP34
2	61417617	A	36	G	11	AF=0.333	0/0/1	3	0.000346001	0.16591	USP34
2	61493225	T	85	A	58	AF=0.333	0/0/1	3	0.0293316	0.0755741	USP34
2	62100380	G	473	T	868	AF=0.667	0/1/1	3	2.26228e-27	0.131888	CCT4
2	63273351	G	45	T	74	AF=0.667	0/1/1	3	0.00996632	0.330604	EHBP1, LOC100132215
2	63826932	C	19	A	4	AF=0.333	0/0/1	3	0.00259948	0.123957	MDH1
2	64327592	T	94	C	51	AF=0.333	0/0/1	3	0.000446431	0.659692	PELI1
2	65283581	C	21	T	58	AF=0.667	0/1/1	3	3.76151e-05	0.23317	CEP68
2	65496187	G	708	A	310	AF=0.333	0/0/1	3	1.89014e-36	0.053828	ACTR2
2	65496251	G	507	T	235	AF=0.333	0/0/1	3	7.98245e-24	0.370342	ACTR2
2	65539641	C	23	T	60	AF=0.667	0/1/1	3	5.9736e-05	0.297144	SPRED2
2	65540905	C	33	G	65	AF=0.667	0/1/1	3	0.00160058	0.915113	SPRED2
2	68402360	A	91	G	189	AF=0.667	0/1/1	3	4.74987e-09	0.800104	PNO1
2	68407926	A	109	G	57	AF=0.333	0/0/1	3	6.64759e-05	0.80496	PPP3R1
2	68415767	G	169	A	94	AF=0.333	0/0/1	3	4.37867e-06	0.395856	PPP3R1
2	68479576	G	94	A	50	AF=0.333	0/0/1	3	0.000307723	0.724015	PPP3R1
2	68687399	T	2	A	15	AF=0.667	0/1/1	3	0.00234985	0.0715024	None
2	69002281	C	47	G	88	AF=0.667	0/1/1	3	0.000527335	0.715387	ARHGAP25
2	69548591	C	26	T	6	AF=0.333	0/0/1	3	0.000535053	0.0921202	GFPT1
2	69550036	T	100	C	41	AF=0.333	0/0/1	3	7.2371e-07	0.325748	GFPT1
2	69550256	C	40	T	18	AF=0.333	0/0/1	3	0.00535486	0.781684	GFPT1
2	69550652	G	27	A	7	AF=0.333	0/0/1	3	0.000821395	0.145148	GFPT1
2	69551011	T	72	C	29	AF=0.333	0/0/1	3	2.23696e-05	0.344399	GFPT1
2	70247201	C	4	G	19	AF=0.667	0/1/1	3	0.00259948	0.123957	PCBP1-AS1
2	70439404	C	133	T	264	AF=0.667	0/1/1	3	4.58652e-11	0.95754	TIA1
2	70445251	G	17	C	33	AF=0.667	0/1/1	3	0.0328391	0.882056	TIA1
2	70450429	G	4	C	17	AF=0.667	0/1/1	3	0.00719738	0.245886	TIA1
2	70485320	C	15	T	53	AF=0.667	0/1/1	3	4.11597e-06	0.053372	PCYOX1
2	70518842	C	11	G	40	AF=0.667	0/1/1	3	5.70381e-05	0.100887	SNRPG
2	70520875	C	12	T	42	AF=0.667	0/1/1	3	5.20945e-05	0.111042	None
2	70995217	A	117	T	73	AF=0.333	0/0/1	3	0.00173787	0.143549	ADD2
2	71215025	G	387	A	215	AF=0.333	0/0/1	3	2.27122e-12	0.210034	TEX261
2	71216246	A	17	C	6	AF=0.333	0/0/1	3	0.0346897	0.516661	TEX261
2	71298338	C	1	T	9	AF=0.667	0/1/1	3	0.0214844	0.180663	NAGK
2	71305456	C	50	T	77	AF=0.667	0/1/1	3	0.0206808	0.157863	NAGK
2	71559107	T	30	G	8	AF=0.333	0/0/1	3	0.000471987	0.12292	ZNF638
2	71609097	C	24	T	10	AF=0.333	0/0/1	3	0.0243065	0.718251	ZNF638
2	71631109	A	63	G	142	AF=0.667	0/1/1	3	3.49068e-08	0.459369	ZNF638
2	71633275	T	107	C	54	AF=0.333	0/0/1	3	3.58041e-05	0.933565	ZNF638
2	71658541	C	107	T	175	AF=0.667	0/1/1	3	6.13e-05	0.100631	ZNF638
2	73297743	C	25	A	12	AF=0.333	0/0/1	3	0.047031	1	SFXN5
2	73307570	C	24	T	11	AF=0.333	0/0/1	3	0.0409596	1	RAB11FIP5
2	73446819	C	6	G	20	AF=0.667	0/1/1	3	0.00935531	0.30574	SMYD5
2	73471653	T	3	G	13	AF=0.667	0/1/1	3	0.0212708	0.292529	CCT7
2	73476857	T	14	C	4	AF=0.333	0/0/1	3	0.0308838	0.454315	CCT7
2	73477527	C	3705	T	1757	AF=0.333	0/0/1	3	2.5552e-156	0.0774377	CCT7
2	73679013	A	27	G	10	AF=0.333	0/0/1	3	0.00763208	0.488121	ALMS1
2	73679280	A	14	G	43	AF=0.667	0/1/1	3	0.000153889	0.205337	ALMS1
2	73679990	T	9	A	33	AF=0.667	0/1/1	3	0.000271539	0.139271	ALMS1
2	73746923	C	14	T	34	AF=0.667	0/1/1	3	0.0055152	0.646588	ALMS1
2	73958262	T	31	A	9	AF=0.333	0/0/1	3	0.000679548	0.179822	TPRKB
2	74007136	T	301	C	134	AF=0.333	0/0/1	3	7.65777e-16	0.285509	DUSP11
2	74376412	T	90	C	34	AF=0.333	0/0/1	3	5.08833e-07	0.182447	BOLA3-AS1
2	74376812	T	70	C	23	AF=0.333	0/0/1	3	1.10263e-06	0.0981745	BOLA3-AS1
2	74690039	G	128	A	255	AF=0.667	0/1/1	3	8.17693e-11	0.956807	MOGS
2	74690378	C	66	T	118	AF=0.667	0/1/1	3	0.000155085	0.481574	MOGS
2	74710491	C	77	T	166	AF=0.667	0/1/1	3	1.14313e-08	0.633988	TTC31
2	74721055	A	63	G	168	AF=0.667	0/1/1	3	3.28267e-12	0.0591662	TTC31
2	75060215	T	64	G	22	AF=0.333	0/0/1	3	6.54423e-06	0.137939	HK2
2	85628983	C	240	T	118	AF=0.333	0/0/1	3	1.06771e-10	0.910834	CAPG
2	86670200	G	3	A	18	AF=0.667	0/1/1	3	0.00148964	0.067485	KDM3A
2	86690056	C	6	T	19	AF=0.667	0/1/1	3	0.0146333	0.399621	KDM3A
2	86756381	T	74	G	135	AF=0.667	0/1/1	3	2.94123e-05	0.509894	CHMP3, RNF103-CHMP3
2	86979093	G	93	A	51	AF=0.333	0/0/1	3	0.00058514	0.59635	RMND5A
2	87003028	C	114	T	48	AF=0.333	0/0/1	3	2.25544e-07	0.359301	RMND5A
2	87003197	C	119	G	62	AF=0.333	0/0/1	3	2.73026e-05	0.813052	RMND5A
2	96874590	T	61	C	23	AF=0.333	0/0/1	3	4.07713e-05	0.297421	LOC285033
2	96874591	T	61	C	23	AF=0.333	0/0/1	3	4.07713e-05	0.297421	LOC285033
2	96919642	C	47	T	17	AF=0.333	0/0/1	3	0.000226882	0.289747	TMEM127
2	96934504	T	195	C	81	AF=0.333	0/0/1	3	5.16684e-12	0.179799	CIAO1
2	96937296	G	204	C	92	AF=0.333	0/0/1	3	6.59581e-11	0.459317	CIAO1
2	96938048	A	123	C	61	AF=0.333	0/0/1	3	5.68501e-06	1	CIAO1
2	97020049	T	352	C	205	AF=0.333	0/0/1	3	4.92115e-10	0.0797329	NCAPH
2	97298949	T	13	C	4	AF=0.333	0/0/1	3	0.0490417	0.453466	KANSL3
2	97527739	A	20	C	58	AF=0.667	0/1/1	3	1.95191e-05	0.185837	SEMA4C
2	97558926	T	42	C	16	AF=0.333	0/0/1	3	0.000861782	0.404901	FAM178B
2	99149946	G	35	A	8	AF=0.333	0/0/1	3	4.19342e-05	0.0507615	INPP4A
2	99205962	T	23	C	7	AF=0.333	0/0/1	3	0.00522288	0.33276	INPP4A
2	99216531	A	72	G	28	AF=0.333	0/0/1	3	1.25792e-05	0.28945	COA5
2	99222916	C	95	T	54	AF=0.333	0/0/1	3	0.000983333	0.435657	COA5
2	99224592	A	62	G	27	AF=0.333	0/0/1	3	0.000265585	0.652926	COA5
2	99225168	C	230	T	115	AF=0.333	0/0/1	3	5.85869e-10	1	UNC50
2	100894887	C	53	T	28	AF=0.333	0/0/1	3	0.0072755	0.814182	LONRF2
2	100900406	G	46	A	17	AF=0.333	0/0/1	3	0.000336709	0.349522	LONRF2
2	101009055	C	110	G	53	AF=0.333	0/0/1	3	9.46641e-06	0.868304	CHST10
2	101010082	G	175	C	102	AF=0.333	0/0/1	3	1.36325e-05	0.225776	CHST10
2	101031561	G	125	T	51	AF=0.333	0/0/1	3	2.34956e-08	0.23145	CHST10
2	101186088	C	360	T	177	AF=0.333	0/0/1	3	2.17225e-15	0.890819	PDCL3
2	101898412	G	115	C	43	AF=0.333	0/0/1	3	9.0288e-09	0.109214	RNF149
2	101900500	T	34	C	11	AF=0.333	0/0/1	3	0.000824082	0.267868	RNF149
2	102508146	G	82	A	182	AF=0.667	0/1/1	3	6.99013e-10	0.472789	MAP4K4
2	102972807	G	19	A	43	AF=0.667	0/1/1	3	0.00315606	0.787691	IL18R1
2	103039686	C	21	A	40	AF=0.667	0/1/1	3	0.0204147	0.892107	IL18RAP
2	105882601	C	48	T	13	AF=0.333	0/0/1	3	7.66517e-06	0.0562408	LOC644617
2	105953236	A	8	G	26	AF=0.667	0/1/1	3	0.00293506	0.2766	None
2	109301687	G	81	C	151	AF=0.667	0/1/1	3	5.04518e-06	0.625918	LIMS1
2	111961277	G	23	A	6	AF=0.333	0/0/1	3	0.0023157	0.171514	None
2	112004381	C	8	A	20	AF=0.667	0/1/1	3	0.0356981	0.691405	LOC541471
2	113334572	A	24	C	68	AF=0.667	0/1/1	3	4.93535e-06	0.151555	POLR1B
2	113403263	G	5	A	15	AF=0.667	0/1/1	3	0.0413895	0.48797	None
2	113421322	T	239	C	138	AF=0.333	0/0/1	3	2.21783e-07	0.172375	SLC20A1
2	113513825	T	24	C	67	AF=0.667	0/1/1	3	7.34855e-06	0.182207	CKAP2L
2	113514159	T	110	A	50	AF=0.333	0/0/1	3	2.38821e-06	0.615529	CKAP2L
2	113514180	T	85	C	42	AF=0.333	0/0/1	3	0.000170094	1	CKAP2L
2	113514763	T	149	C	68	AF=0.333	0/0/1	3	3.94458e-08	0.565133	CKAP2L
2	113993344	A	33	C	78	AF=0.667	0/1/1	3	2.32627e-05	0.481149	LOC654433, PAX8
2	113994461	G	7	A	21	AF=0.667	0/1/1	3	0.012541	0.42593	LOC654433, PAX8
2	114469135	C	29	G	84	AF=0.667	0/1/1	3	2.20077e-07	0.0900573	None
2	114470302	A	31	G	12	AF=0.333	0/0/1	3	0.00540157	0.519916	None
2	118583940	C	395	T	180	AF=0.333	0/0/1	3	1.69181e-19	0.330374	DDX18
2	119600769	G	6	A	25	AF=0.667	0/1/1	3	0.00087791	0.126647	EN1
2	121061194	C	4	T	17	AF=0.667	0/1/1	3	0.00719738	0.245886	None
2	127415578	C	51	T	26	AF=0.333	0/0/1	3	0.00587071	0.904441	GYPC
2	127443627	A	33	G	8	AF=0.333	0/0/1	3	0.000112221	0.06827	GYPC
2	127443771	G	24	T	7	AF=0.333	0/0/1	3	0.00332689	0.254392	GYPC
2	128028130	G	10	A	35	AF=0.667	0/1/1	3	0.000247088	0.153429	ERCC3
2	128028792	T	2	C	12	AF=0.667	0/1/1	3	0.0129395	0.163098	ERCC3
2	128049631	T	4	C	21	AF=0.667	0/1/1	3	0.000910521	0.0877184	ERCC3
2	128602341	T	61	C	33	AF=0.333	0/0/1	3	0.00507844	0.742904	None
2	128615330	C	42	G	14	AF=0.333	0/0/1	3	0.000234446	0.204496	POLR2D
2	128939799	C	336	T	145	AF=0.333	0/0/1	3	1.61749e-18	0.146862	UGGT1
2	128939817	G	326	A	145	AF=0.333	0/0/1	3	4.49914e-17	0.260937	UGGT1
2	128947505	G	116	A	76	AF=0.333	0/0/1	3	0.00475524	0.0664165	UGGT1
2	128949208	G	76	A	52	AF=0.333	0/0/1	3	0.0416383	0.0909528	UGGT1
2	128950217	C	181	T	98	AF=0.333	0/0/1	3	7.64611e-07	0.525562	UGGT1
2	130916286	C	45	T	16	AF=0.333	0/0/1	3	0.000264279	0.278158	SMPD4
2	131100496	G	183	A	358	AF=0.667	0/1/1	3	4.46519e-14	0.784557	IMP4
2	131104049	C	341	T	167	AF=0.333	0/0/1	3	9.06008e-15	0.887711	IMP4
2	131104524	G	285	A	544	AF=0.667	0/1/1	3	1.6437e-19	0.507366	None
2	131119200	A	1	G	10	AF=0.667	0/1/1	3	0.0117188	0.113886	PTPN18
2	131131866	A	120	G	210	AF=0.667	0/1/1	3	8.28528e-07	0.242961	PTPN18
2	131131869	A	120	G	216	AF=0.667	0/1/1	3	1.81927e-07	0.3546	PTPN18
2	148692776	T	64	C	23	AF=0.333	0/0/1	3	1.26535e-05	0.210492	ORC4
2	148778272	A	101	G	158	AF=0.667	0/1/1	3	0.000478843	0.0558047	ORC4
2	150430516	C	1	A	10	AF=0.75	0/1/1/1	4	0.0117188	0.311724	MMADHC
2	160617235	T	2	C	23	AF=0.75	0/1/1/1	4	1.94311e-05	0.0617784	42801
2	170684224	C	18	T	35	AF=0.75	0/1/1/1	4	0.0270083	0.15217	UBR3
3	13459376	C	74	A	29	AF=0.25	0/0/1	4	1.07053e-05	0.49453	NUP210
3	139094370	C	168	A	300	AF=0.667	0/0/1	3	1.09389e-09	0.239261	COPB2
3	195420641	A	28	T	10	AF=0.333	0/0/1	3	0.00509764	0.395478	None
3	195421170	C	13	G	30	AF=0.667	0/0/1	3	0.0137182	0.747955	None
3	195423524	G	65	A	24	AF=0.333	0/0/1	3	1.61138e-05	0.217891	None
3	195423819	C	42	T	23	AF=0.333	0/0/1	3	0.024812	0.695491	None
3	195424611	G	110	A	47	AF=0.333	0/0/1	3	5.34215e-07	0.397901	None
3	195425279	G	33	A	16	AF=0.333	0/0/1	3	0.0212941	1	None
3	195425645	T	15	G	42	AF=0.667	0/0/1	3	0.000460005	0.325251	None
3	195425653	C	14	A	35	AF=0.667	0/0/1	3	0.00380165	0.546457	None
3	195425678	T	54	C	22	AF=0.333	0/0/1	3	0.000312979	0.46669	None
3	195425706	T	25	G	53	AF=0.667	0/0/1	3	0.00203114	0.904537	None
3	195425993	C	238	G	116	AF=0.333	0/0/1	3	8.3079e-11	0.865751	None
4	45410	A	19	C	6	AF=0.333	0/0/1	3	0.0146333	0.399621	None
4	57088	T	102	G	212	AF=0.667	0/0/1	3	5.16027e-10	0.810764	ZNF595, ZNF718
4	57285	G	85	T	40	AF=0.333	0/0/1	3	7.02892e-05	0.84953	ZNF595, ZNF718
4	57816	A	64	T	26	AF=0.333	0/0/1	3	7.65707e-05	0.433979	ZNF595, ZNF718
4	63024	G	275	A	559	AF=0.667	0/0/1	3	4.30513e-23	0.854344	ZNF595, ZNF718
4	64397	G	255	A	131	AF=0.333	0/0/1	3	2.71644e-10	0.78735	ZNF595, ZNF718
4	421631	G	1	A	9	AF=0.667	0/0/1	3	0.0214844	0.180663	ABCA11P
4	760819	C	89	T	152	AF=0.667	0/0/1	3	5.94642e-05	0.24528	PCGF3
4	770508	C	1	T	11	AF=0.667	0/0/1	3	0.00634766	0.0728458	None
4	851640	G	16	A	4	AF=0.333	0/0/1	3	0.0118179	0.243595	GAK
4	946226	T	91	C	61	AF=0.333	0/0/1	3	0.0183674	0.0848353	TMEM175
4	958090	G	19	C	47	AF=0.667	0/0/1	3	0.000756107	0.514216	DGKQ
4	987663	G	11	C	39	AF=0.667	0/0/1	3	9.02149e-05	0.0995314	IDUA
4	1212454	C	5	T	25	AF=0.667	0/0/1	3	0.000324914	0.0543561	CTBP1, HV535487
4	1236312	C	38	T	89	AF=0.667	0/0/1	3	6.97366e-06	0.452291	CTBP1
4	1236772	C	13	T	34	AF=0.667	0/0/1	3	0.00308768	0.444072	CTBP1
4	1238246	G	12	A	25	AF=0.667	0/0/1	3	0.047031	1	CTBP1
4	1238338	C	21	T	5	AF=0.333	0/0/1	3	0.00249392	0.148446	CTBP1
4	1239312	C	35	T	17	AF=0.333	0/0/1	3	0.0175332	1	CTBP1
4	1295991	C	1	T	12	AF=0.667	0/0/1	3	0.00341797	0.0731862	MAEA
4	1296009	G	1	A	12	AF=0.667	0/0/1	3	0.00341797	0.0731862	MAEA
4	1330759	T	171	C	390	AF=0.667	0/0/1	3	1.10809e-20	0.164969	MAEA
4	1330983	A	11	C	24	AF=0.667	0/0/1	3	0.0409596	1	MAEA
4	1339875	G	2	A	14	AF=0.667	0/0/1	3	0.00418091	0.109353	None
4	1348920	G	12	A	38	AF=0.667	0/0/1	3	0.000305864	0.179261	UVSSA
4	1377942	C	4	G	20	AF=0.667	0/0/1	3	0.00154388	0.126936	UVSSA
4	1380033	A	14	G	30	AF=0.667	0/0/1	3	0.0226288	1	UVSSA
4	1718883	A	121	T	255	AF=0.667	0/0/1	3	4.13984e-12	0.662003	TMEM129
4	1719620	T	21	G	46	AF=0.667	0/0/1	3	0.00306532	0.796405	TMEM129
4	1719633	A	47	C	22	AF=0.333	0/0/1	3	0.00354481	0.898551	TMEM129
4	1721002	C	98	T	48	AF=0.333	0/0/1	3	4.26635e-05	1	TMEM129
4	1724178	G	29	A	9	AF=0.333	0/0/1	3	0.00165805	0.232455	TACC3
4	1729556	G	314	A	137	AF=0.333	0/0/1	3	4.56736e-17	0.194214	TACC3
4	1731345	A	76	G	43	AF=0.333	0/0/1	3	0.00318318	0.497919	TACC3
4	1739976	C	30	T	9	AF=0.333	0/0/1	3	0.00106502	0.233642	TACC3
4	1741325	A	21	G	6	AF=0.333	0/0/1	3	0.00592461	0.307037	TACC3
4	1742779	G	1	A	9	AF=0.667	0/0/1	3	0.0214844	0.180663	TACC3
4	1941422	C	136	T	51	AF=0.333	0/0/1	3	4.06725e-10	0.0876886	WHSC1
4	1957848	G	332	A	158	AF=0.333	0/0/1	3	2.81082e-15	0.632123	WHSC1
4	2252196	G	62	A	22	AF=0.333	0/0/1	3	1.4656e-05	0.202478	MXD4
4	2312036	G	18	A	7	AF=0.333	0/0/1	3	0.0432853	0.674741	ZFYVE28
4	2319546	G	7	C	22	AF=0.667	0/0/1	3	0.00813006	0.331762	ZFYVE28
4	2341194	T	88	C	36	AF=0.333	0/0/1	3	3.39192e-06	0.341494	ZFYVE28
4	2341965	C	30	T	10	AF=0.333	0/0/1	3	0.00222143	0.315948	ZFYVE28
4	2344692	G	22	A	9	AF=0.333	0/0/1	3	0.0294494	0.705743	ZFYVE28
4	2828992	C	8	T	25	AF=0.667	0/0/1	3	0.00455138	0.35591	SH3BP2
4	2836628	C	34	T	18	AF=0.333	0/0/1	3	0.0364834	0.883237	SH3BP2
4	2837763	G	18	C	6	AF=0.333	0/0/1	3	0.0226558	0.517006	SH3BP2
4	2937485	T	85	G	43	AF=0.333	0/0/1	3	0.000258527	0.925585	AB000466, NOP14-AS1
4	2939904	G	62	A	164	AF=0.667	0/0/1	3	8.11205e-12	0.066342	AB000466, NOP14, NOP14-AS1
4	2965611	G	43	C	14	AF=0.333	0/0/1	3	0.000153889	0.205337	GRK4
4	2965676	C	46	T	22	AF=0.333	0/0/1	3	0.00490338	1	GRK4
4	3512563	C	11	T	36	AF=0.667	0/0/1	3	0.000346001	0.16591	LRPAP1
4	3530743	C	4	T	13	AF=0.667	0/0/1	3	0.0490417	0.453466	LRPAP1
4	4242527	G	13	A	35	AF=0.667	0/0/1	3	0.00208811	0.444293	TMEM128
4	4291825	C	100	T	215	AF=0.667	0/0/1	3	8.30077e-11	0.590778	LYAR
4	4291832	A	89	T	195	AF=0.667	0/0/1	3	2.91152e-10	0.52902	LYAR
4	6596360	G	33	A	15	AF=0.333	0/0/1	3	0.0132833	0.878591	MAN2B2
4	6644273	C	866	G	477	AF=0.333	0/0/1	3	1.51985e-26	0.0876002	MRFAP1
4	6677063	G	333	A	597	AF=0.667	0/0/1	3	3.87116e-18	0.109483	LOC93622
4	6698664	G	52	A	118	AF=0.667	0/0/1	3	4.4905e-07	0.515092	S100P
4	6883012	C	59	T	28	AF=0.333	0/0/1	3	0.00116864	0.909574	KIAA0232
4	6883326	A	78	G	49	AF=0.333	0/0/1	3	0.0126607	0.22102	KIAA0232
4	7033671	C	156	T	259	AF=0.667	0/0/1	3	4.86078e-07	0.0682357	LOC100129931, TBC1D14
4	7058882	A	29	T	48	AF=0.667	0/0/1	3	0.0395395	0.468168	TADA2B
4	8454639	A	17	G	58	AF=0.667	0/0/1	3	2.18233e-06	0.0506336	TRMT44
4	10088260	A	2	G	10	AF=0.667	0/0/1	3	0.0385742	0.358815	WDR1
4	10115692	T	6	A	18	AF=0.667	0/0/1	3	0.0226558	0.517006	WDR1
4	10115703	G	20	A	6	AF=0.333	0/0/1	3	0.00935531	0.30574	WDR1
4	10415778	C	1	T	10	AF=0.667	0/0/1	3	0.0117188	0.113886	None
4	15102887	A	20	G	6	AF=0.333	0/0/1	3	0.00935531	0.30574	None
4	17513724	G	28	C	8	AF=0.333	0/0/1	3	0.00119324	0.21486	QDPR
4	17805379	G	223	A	135	AF=0.333	0/0/1	3	3.83507e-06	0.0820627	DCAF16
4	17809265	G	18	T	40	AF=0.667	0/0/1	3	0.00535486	0.781684	DCAF16
4	17818885	T	172	C	290	AF=0.667	0/0/1	3	4.44694e-08	0.0756074	NCAPG
4	17822768	C	4	T	16	AF=0.667	0/0/1	3	0.0118179	0.243595	NCAPG
4	20711390	A	26	G	75	AF=0.667	0/0/1	3	1.1155e-06	0.113909	PACRGL
4	23391471	A	2	T	11	AF=0.667	0/0/1	3	0.0224609	0.242342	None
4	25125703	C	24	G	46	AF=0.667	0/0/1	3	0.0115264	0.89922	SEPSECS
4	25236017	T	19	C	41	AF=0.667	0/0/1	3	0.0062176	0.891277	PI4K2B
4	25279456	T	61	A	33	AF=0.333	0/0/1	3	0.00507844	0.742904	PI4K2B
4	25347771	G	35	A	13	AF=0.333	0/0/1	3	0.00208811	0.444293	ZCCHC4
4	25780599	C	7	T	22	AF=0.667	0/0/1	3	0.00813006	0.331762	SEL1L3
4	26860413	G	12	A	28	AF=0.667	0/0/1	3	0.016589	0.739121	None
4	37836302	T	227	C	132	AF=0.333	0/0/1	3	6.06861e-07	0.162032	PGM2
4	38946824	C	11	T	24	AF=0.667	0/0/1	3	0.0409596	1	FAM114A1
4	39216240	G	7	A	21	AF=0.667	0/0/1	3	0.012541	0.42593	WDR19
4	39457430	T	180	C	84	AF=0.333	0/0/1	3	3.39704e-09	0.647817	RPL9
4	39457469	A	92	T	145	AF=0.667	0/0/1	3	0.000698049	0.0733782	RPL9
4	39458714	C	24	T	76	AF=0.667	0/0/1	3	1.81e-07	0.0556105	RPL9
4	39459031	T	42	C	23	AF=0.333	0/0/1	3	0.024812	0.695491	RPL9
4	39459724	T	23	C	7	AF=0.333	0/0/1	3	0.00522288	0.33276	RPL9
4	39460328	G	124	A	235	AF=0.667	0/0/1	3	4.87976e-09	0.614665	RPL9
4	39460352	C	116	G	186	AF=0.667	0/0/1	3	6.69159e-05	0.0668064	RPL9
4	39824758	A	76	G	27	AF=0.333	0/0/1	3	1.4458e-06	0.143285	PDS5A
4	39864693	C	195	T	83	AF=0.333	0/0/1	3	1.48655e-11	0.251938	PDS5A
4	40138676	A	36	G	16	AF=0.333	0/0/1	3	0.00778744	0.769889	N4BP2
4	40157213	T	27	C	11	AF=0.333	0/0/1	3	0.013853	0.730926	N4BP2
4	40158167	A	51	G	20	AF=0.333	0/0/1	3	0.000303163	0.381438	N4BP2
4	40244347	T	42	C	86	AF=0.667	0/0/1	3	0.000125358	1	RHOH
4	44701256	G	105	T	52	AF=0.333	0/0/1	3	2.82309e-05	1	GUF1
4	44701446	A	56	G	96	AF=0.667	0/0/1	3	0.00147623	0.345502	GUF1
4	44701750	A	43	C	100	AF=0.667	0/0/1	3	2.10046e-06	0.477851	GUF1
4	44701764	T	47	G	92	AF=0.667	0/0/1	3	0.000168522	0.928336	GUF1
4	44705595	G	1	A	10	AF=0.667	0/0/1	3	0.0117188	0.113886	GNPDA2
4	44705601	T	2	C	10	AF=0.667	0/0/1	3	0.0385742	0.358815	GNPDA2
4	44707815	G	8	T	33	AF=0.667	0/0/1	3	0.000112221	0.06827	GNPDA2
4	47887536	T	93	C	38	AF=0.333	0/0/1	3	1.70051e-06	0.309682	NFXL1
4	47901476	G	33	A	13	AF=0.333	0/0/1	3	0.00453386	0.53375	NFXL1
4	48856052	C	20	T	6	AF=0.333	0/0/1	3	0.00935531	0.30574	OCIAD1
4	52753118	G	44	A	24	AF=0.333	0/0/1	3	0.0205269	0.701839	DCUN1D4
4	52780048	G	94	C	46	AF=0.333	0/0/1	3	6.10603e-05	1	DCUN1D4
4	53463566	C	24	T	55	AF=0.667	0/0/1	3	0.000639398	0.634304	USP46
4	53582923	T	1	G	11	AF=0.667	0/0/1	3	0.00634766	0.0728458	None
4	56291751	A	96	C	228	AF=0.667	0/0/1	3	1.56734e-13	0.175142	TMEM165
4	57257227	A	22	G	4	AF=0.333	0/0/1	3	0.000533521	0.0605731	None
4	57260298	C	250	G	100	AF=0.333	0/0/1	3	5.90277e-16	0.0613844	PPAT
4	57317347	G	39	T	88	AF=0.667	0/0/1	3	1.63338e-05	0.57309	PAICS
4	57326996	C	982	T	1854	AF=0.667	0/0/1	3	4.46161e-61	0.135152	PAICS
4	57327405	T	120	C	209	AF=0.667	0/0/1	3	1.06066e-06	0.219908	PAICS
4	57362827	G	6	A	17	AF=0.667	0/0/1	3	0.0346897	0.516661	SRP72
4	68478554	G	31	A	74	AF=0.667	0/0/1	3	3.27554e-05	0.468873	None
4	68479934	C	16	T	41	AF=0.667	0/0/1	3	0.00126356	0.482733	None
4	68482401	T	11	C	38	AF=0.667	0/0/1	3	0.000141971	0.129201	UBA6
4	68482405	G	11	C	38	AF=0.667	0/0/1	3	0.000141971	0.129201	UBA6
4	68483534	G	45	A	98	AF=0.667	0/0/1	3	1.10179e-05	0.722748	UBA6
4	68497597	C	97	A	209	AF=0.667	0/0/1	3	1.39209e-10	0.585369	UBA6
4	68500171	A	56	G	115	AF=0.667	0/0/1	3	7.55173e-06	0.935396	UBA6
4	68570902	C	2	T	15	AF=0.667	0/0/1	3	0.00234985	0.0715024	LOC550112
4	68578322	C	3	T	17	AF=0.667	0/0/1	3	0.00257683	0.0981777	LOC550112
4	73414286	C	75	T	32	AF=0.333	0/0/1	3	3.91872e-05	0.538338	ADAMTS3
4	73436699	G	1	A	11	AF=0.667	0/0/1	3	0.00634766	0.0728458	None
4	76469054	T	45	C	19	AF=0.333	0/0/1	3	0.00156279	0.597386	THAP6
4	76469838	A	56	G	17	AF=0.333	0/0/1	3	5.26868e-06	0.0815029	THAP6
4	79832500	C	221	T	104	AF=0.333	0/0/1	3	7.79719e-11	0.638238	BMP2K, PAQR3
4	80146690	G	4	A	20	AF=0.667	0/0/1	3	0.00154388	0.126936	LOC100505875
4	80148826	C	48	G	76	AF=0.667	0/0/1	3	0.0149846	0.215516	LOC100505875
4	80149015	A	27	C	65	AF=0.667	0/0/1	3	9.26404e-05	0.441488	LOC100505875
4	80149031	T	32	A	54	AF=0.667	0/0/1	3	0.0229826	0.492454	LOC100505875
4	80827798	A	303	G	130	AF=0.333	0/0/1	3	5.31444e-17	0.153563	ANTXR2
4	80827799	A	302	C	128	AF=0.333	0/0/1	3	2.65601e-17	0.124902	ANTXR2
4	80990854	C	4	T	13	AF=0.667	0/0/1	3	0.0490417	0.453466	ANTXR2
4	83274634	C	24	T	48	AF=0.667	0/0/1	3	0.00630983	1	HNRNPD
4	83278915	T	17	A	39	AF=0.667	0/0/1	3	0.00456153	0.776905	HNRNPD
4	83279071	G	5	A	21	AF=0.667	0/0/1	3	0.00249392	0.148446	HNRNPD
4	83295916	T	5	A	18	AF=0.667	0/0/1	3	0.010622	0.276561	None
4	83344744	T	141	C	56	AF=0.333	0/0/1	3	1.20719e-09	0.151608	HNRPDL
4	83742585	C	5	T	24	AF=0.667	0/0/1	3	0.000546113	0.0763424	SEC31A
4	84383810	C	71	T	137	AF=0.667	0/0/1	3	5.54313e-06	0.825386	FAM175A
4	84385109	T	3	C	16	AF=0.667	0/0/1	3	0.00442505	0.143458	FAM175A
4	84526573	A	51	G	21	AF=0.333	0/0/1	3	0.000534964	0.532287	AGPAT9
4	88057353	G	102	A	176	AF=0.667	0/0/1	3	1.06907e-05	0.227419	AFF1
4	88058337	A	44	T	107	AF=0.667	0/0/1	3	3.08573e-07	0.300767	AFF1
4	88058340	C	107	G	43	AF=0.333	0/0/1	3	1.77201e-07	0.260041	AFF1
4	88060025	C	70	A	126	AF=0.667	0/0/1	3	7.70506e-05	0.495303	AFF1
4	88081534	A	21	T	6	AF=0.333	0/0/1	3	0.00592461	0.307037	None
4	88082177	G	38	A	19	AF=0.333	0/0/1	3	0.0163481	1	None
4	88082526	T	52	C	139	AF=0.667	0/0/1	3	2.39602e-10	0.0776217	KLHL8
4	88116798	C	52	T	81	AF=0.667	0/0/1	3	0.0148726	0.16757	KLHL8
4	95129135	G	83	A	37	AF=0.333	0/0/1	3	3.24316e-05	0.628518	SMARCAD1
4	100468685	A	15	G	3	AF=0.333	0/0/1	3	0.00753784	0.209209	TRMT10A
4	100801273	A	41	G	17	AF=0.333	0/0/1	3	0.00223255	0.579144	LAMTOR3
4	100820850	C	67	T	30	AF=0.333	0/0/1	3	0.00021891	0.667557	DNAJB14
4	103183218	G	53	A	122	AF=0.667	0/0/1	3	1.92717e-07	0.423278	SLC39A8
4	103184089	A	47	G	91	AF=0.667	0/0/1	3	0.0002253	0.856894	SLC39A8
4	103225513	T	55	C	128	AF=0.667	0/0/1	3	6.94247e-08	0.38845	SLC39A8
4	106196829	T	18	G	58	AF=0.667	0/0/1	3	4.71324e-06	0.0878669	TET2
4	106196951	A	40	G	12	AF=0.333	0/0/1	3	0.000127539	0.140979	TET2
4	106629453	C	13	T	45	AF=0.667	0/0/1	3	3.01159e-05	0.0938838	INTS12
4	107241936	G	63	A	29	AF=0.333	0/0/1	3	0.00050909	0.824999	AIMP1
4	109089310	C	15	G	40	AF=0.667	0/0/1	3	0.00101585	0.392403	LEF1, LEF1-AS1
4	109097372	C	4	T	20	AF=0.667	0/0/1	3	0.00154388	0.126936	LEF1-AS1
4	110603784	T	60	C	18	AF=0.333	0/0/1	3	1.97302e-06	0.0553663	CCDC109B
4	110610192	C	32	T	65	AF=0.667	0/0/1	3	0.00104961	1	CASP6
4	110628894	C	28	T	8	AF=0.333	0/0/1	3	0.00119324	0.21486	None
4	113305623	A	14	G	35	AF=0.667	0/0/1	3	0.00380165	0.546457	ALPK1
4	113318324	G	3	A	17	AF=0.667	0/0/1	3	0.00257683	0.0981777	ALPK1
4	113562047	A	1	G	10	AF=0.667	0/0/1	3	0.0117188	0.113886	LARP7
4	119636395	G	1	T	9	AF=0.667	0/0/1	3	0.0214844	0.180663	None
4	120181724	A	14	G	44	AF=0.667	0/0/1	3	0.000100497	0.163628	USP53
4	120215314	A	99	G	34	AF=0.333	0/0/1	3	1.48773e-08	0.0654109	USP53
4	127483549	G	25	A	55	AF=0.667	0/0/1	3	0.00105273	0.81257	None
4	127510424	A	31	G	12	AF=0.333	0/0/1	3	0.00540157	0.519916	None
4	127557526	G	5	A	17	AF=0.667	0/0/1	3	0.0169005	0.369388	None
4	127696612	C	18	T	5	AF=0.333	0/0/1	3	0.010622	0.276561	None
4	129867280	T	55	A	24	AF=0.333	0/0/1	3	0.000639398	0.634304	SCLT1
4	139104415	C	51	T	30	AF=0.333	0/0/1	3	0.0256544	0.480722	SLC7A11
4	139125762	C	21	T	5	AF=0.333	0/0/1	3	0.00249392	0.148446	SLC7A11
4	139140494	G	90	C	34	AF=0.333	0/0/1	3	5.08833e-07	0.182447	SLC7A11
4	140222537	A	11	G	28	AF=0.667	0/0/1	3	0.0094753	0.611072	NDUFC1
4	140616417	C	447	T	951	AF=0.667	0/0/1	3	3.77187e-42	0.307009	MGST2
4	142240955	C	18	G	51	AF=0.667	0/0/1	3	8.76866e-05	0.250044	None
4	142241253	C	7	T	31	AF=0.667	0/0/1	3	0.000116167	0.0579195	None
4	142243897	T	10	C	39	AF=0.667	0/0/1	3	3.84591e-05	0.0678254	AK124399
4	144474666	A	9	C	26	AF=0.667	0/0/1	3	0.00598812	0.376264	SMARCA5
4	144800065	A	19	G	6	AF=0.333	0/0/1	3	0.0146333	0.399621	GYPE
4	147097424	T	28	C	7	AF=0.333	0/0/1	3	0.00050826	0.107691	LSM6
4	147110891	A	120	G	69	AF=0.333	0/0/1	3	0.0002551	0.354905	LSM6
4	147176097	A	29	G	8	AF=0.333	0/0/1	3	0.000752897	0.162881	SLC10A7
4	147408345	G	1	T	11	AF=0.667	0/0/1	3	0.00634766	0.0728458	SLC10A7
4	155456390	C	53	G	138	AF=0.667	0/0/1	3	6.38014e-10	0.107319	PLRG1
4	164435265	A	182	C	365	AF=0.667	0/0/1	3	3.98661e-15	1	TMA16
4	164440581	T	137	C	326	AF=0.667	0/0/1	3	7.7706e-19	0.0936882	TMA16
4	164447976	C	9	A	25	AF=0.667	0/0/1	3	0.00904119	0.469672	42795
4	164448049	C	9	T	36	AF=0.667	0/0/1	3	6.57466e-05	0.0590761	42795
4	164449273	G	17	A	47	AF=0.667	0/0/1	3	0.000226882	0.289747	42795
4	164450565	G	21	A	8	AF=0.333	0/0/1	3	0.0241195	0.562011	42795
4	169910021	G	66	T	24	AF=0.333	0/0/1	3	1.0902e-05	0.218308	CBR4
4	170314951	T	16	C	40	AF=0.667	0/0/1	3	0.00184155	0.482647	NEK1
4	170634408	A	123	G	51	AF=0.333	0/0/1	3	4.77886e-08	0.295771	CLCN3
4	173059370	G	3	A	18	AF=0.667	0/0/1	3	0.00148964	0.067485	GALNTL6
4	174086256	C	7	G	27	AF=0.667	0/0/1	3	0.000821395	0.145148	BC040577
4	175204676	A	28	G	71	AF=0.667	0/0/1	3	1.82576e-05	0.337283	FBXO8
4	178274565	A	54	G	19	AF=0.333	0/0/1	3	5.06227e-05	0.214791	NEIL3
4	178274835	A	34	C	14	AF=0.333	0/0/1	3	0.0055152	0.646588	NEIL3
4	178283757	T	35	C	76	AF=0.667	0/0/1	3	0.000124656	0.762836	NEIL3
4	178283798	C	42	G	114	AF=0.667	0/0/1	3	7.13932e-09	0.106141	NEIL3
4	178283967	C	23	T	57	AF=0.667	0/0/1	3	0.000183117	0.409404	NEIL3
4	183812287	A	486	G	211	AF=0.333	0/0/1	3	7.06896e-26	0.0915255	DCTD
4	183812351	C	195	T	392	AF=0.667	0/0/1	3	3.16281e-16	1	DCTD
4	183815688	A	391	G	191	AF=0.333	0/0/1	3	7.97923e-17	0.826058	DCTD
4	183838103	C	42	T	20	AF=0.333	0/0/1	3	0.00714873	1	DCTD
4	184203886	G	62	C	93	AF=0.667	0/0/1	3	0.0156936	0.0879229	WWC2
4	184585015	G	70	A	28	AF=0.333	0/0/1	3	2.64024e-05	0.337152	TRAPPC11
4	185569627	G	25	C	43	AF=0.667	0/0/1	3	0.0384601	0.523485	CASP3
4	186066722	C	43	T	15	AF=0.333	0/0/1	3	0.000306947	0.26603	SLC25A4
4	187334179	C	8	T	23	AF=0.667	0/0/1	3	0.0106738	0.449088	LOC285441
4	187335913	A	62	G	21	AF=0.333	0/0/1	3	7.50533e-06	0.130978	LOC285441
4	187347217	C	23	T	9	AF=0.333	0/0/1	3	0.0200616	0.580369	LOC285441
4	187347655	C	22	T	50	AF=0.667	0/0/1	3	0.00129358	0.708005	LOC285441
4	187812838	G	6	A	17	AF=0.667	0/0/1	3	0.0346897	0.516661	None
5	10210627	A	0	G	10	AF=0.75	0/0/1	4	0.00195312	0.0760412	None
5	31538692	A	83	C	29	AF=0.25	0/0/1	4	3.29085e-07	0.827469	C5orf22
5	31553265	T	230	G	88	AF=0.25	0/0/1	4	8.66567e-16	0.271254	C5orf22
5	31553272	G	229	T	94	AF=0.25	0/0/1	4	3.78644e-14	0.0946518	C5orf22
5	34742676	G	22	A	9	AF=0.25	0/0/1	4	0.0294494	0.677918	RAI14
5	52408245	G	40	A	13	AF=0.333	0/0/1	3	0.00026854	0.192119	LOC257396
5	53625014	G	15	A	4	AF=0.333	0/0/1	3	0.0192108	0.334181	None
5	53629047	G	22	A	6	AF=0.333	0/0/1	3	0.00371917	0.230206	None
5	53704572	C	93	T	46	AF=0.333	0/0/1	3	8.27371e-05	1	None
5	53706056	T	35	A	13	AF=0.333	0/0/1	3	0.00208811	0.444293	None
5	53706161	G	66	A	24	AF=0.333	0/0/1	3	1.0902e-05	0.218308	None
5	53706241	T	85	C	56	AF=0.333	0/0/1	3	0.0180561	0.108344	None
5	53706512	G	120	T	48	AF=0.333	0/0/1	3	2.66414e-08	0.21939	None
5	53712494	T	51	C	76	AF=0.667	0/0/1	3	0.0327896	0.109422	None
5	53738494	C	24	A	6	AF=0.333	0/0/1	3	0.00143091	0.173545	None
5	53747669	G	19	C	5	AF=0.333	0/0/1	3	0.00661075	0.27827	None
5	54031768	A	5	G	16	AF=0.667	0/0/1	3	0.0266037	0.488508	None
5	54031819	A	5	G	16	AF=0.667	0/0/1	3	0.0266037	0.488508	None
5	54031986	T	5	C	25	AF=0.667	0/0/1	3	0.000324914	0.0543561	None
5	54516058	A	1	T	10	AF=0.667	0/0/1	3	0.0117188	0.113886	MCIDAS
5	54603822	T	39	C	108	AF=0.667	0/0/1	3	1.10479e-08	0.0959448	SKIV2L2
5	54645411	G	139	A	322	AF=0.667	0/0/1	3	8.56322e-18	0.166382	SKIV2L2
5	61626262	A	3	G	15	AF=0.667	0/0/1	3	0.00753784	0.209209	KIF2A
5	61686647	C	58	T	18	AF=0.333	0/0/1	3	4.71324e-06	0.0878669	DIMT1
5	61847073	G	255	C	106	AF=0.333	0/0/1	3	2.70313e-15	0.117992	IPO11
5	61923328	T	55	C	91	AF=0.667	0/0/1	3	0.00362478	0.291859	IPO11, IPO11-LRRC70
5	68464910	C	45	T	24	AF=0.333	0/0/1	3	0.0154323	0.799111	CCNB1
5	68505854	A	992	C	527	AF=0.333	0/0/1	3	3.53491e-33	0.252934	CENPH
5	68709909	C	362	G	180	AF=0.333	0/0/1	3	4.20364e-15	1	RAD17
5	72184098	C	192	T	97	AF=0.333	0/0/1	3	2.42642e-08	0.950247	TNPO1
5	72861366	G	45	A	21	AF=0.333	0/0/1	3	0.00427241	0.896291	ANKRA2
5	72876035	G	192	A	82	AF=0.333	0/0/1	3	2.47156e-11	0.248979	UTP15
5	72876119	T	59	C	27	AF=0.333	0/0/1	3	0.00073171	0.819104	UTP15
5	73992881	A	266	G	119	AF=0.333	0/0/1	3	4.94688e-14	0.330845	HEXB
5	74062536	T	21	C	6	AF=0.333	0/0/1	3	0.00592461	0.307037	GFM2
5	74638583	A	91	C	205	AF=0.667	0/0/1	3	2.92415e-11	0.387938	HMGCR
5	74656539	T	283	C	137	AF=0.333	0/0/1	3	8.85015e-13	0.795875	HMGCR
5	74675076	T	15	C	5	AF=0.333	0/0/1	3	0.0413895	0.48797	COL4A3BP
5	74877266	C	38	T	18	AF=0.333	0/0/1	3	0.0104548	1	POLK
5	75884734	G	5	A	25	AF=0.667	0/0/1	3	0.000324914	0.0543561	IQGAP2
5	75996909	G	57	A	88	AF=0.667	0/0/1	3	0.0124569	0.134111	IQGAP2
5	76356725	T	20	C	7	AF=0.333	0/0/1	3	0.0191573	0.541228	AGGF1
5	77412011	A	112	G	271	AF=0.667	0/0/1	3	2.53222e-16	0.0930977	AP3B1
5	77473165	A	56	G	144	AF=0.667	0/0/1	3	4.01539e-10	0.115589	AP3B1
5	77654827	G	14	T	47	AF=0.667	0/0/1	3	2.71919e-05	0.102509	BC039455
5	77781390	G	38	A	12	AF=0.333	0/0/1	3	0.000305864	0.179261	LHFPL2
5	77782447	C	13	G	29	AF=0.667	0/0/1	3	0.0195205	0.87032	LHFPL2
5	77782512	G	40	A	13	AF=0.333	0/0/1	3	0.00026854	0.192119	LHFPL2
5	77783029	T	4	C	14	AF=0.667	0/0/1	3	0.0308838	0.454315	LHFPL2
5	77783101	G	23	A	9	AF=0.333	0/0/1	3	0.0200616	0.580369	LHFPL2
5	78135201	C	5	T	18	AF=0.667	0/0/1	3	0.010622	0.276561	ARSB
5	78608648	A	26	T	10	AF=0.333	0/0/1	3	0.011331	0.596626	JMY
5	78620841	T	54	C	23	AF=0.333	0/0/1	3	0.00053878	0.628761	JMY
5	78910248	C	14	T	3	AF=0.333	0/0/1	3	0.0127258	0.20607	PAPD4
5	78940139	G	23	A	8	AF=0.333	0/0/1	3	0.0106738	0.449088	PAPD4
5	78940783	C	24	T	6	AF=0.333	0/0/1	3	0.00143091	0.173545	PAPD4
5	78981550	G	120	T	52	AF=0.333	0/0/1	3	2.28496e-07	0.419266	PAPD4
5	79438237	A	16	G	32	AF=0.667	0/0/1	3	0.0293049	1	SERINC5
5	79438277	C	11	G	36	AF=0.667	0/0/1	3	0.000346001	0.16591	SERINC5
5	79438312	G	16	C	54	AF=0.667	0/0/1	3	5.85396e-06	0.0751386	SERINC5
5	79438417	C	10	T	26	AF=0.667	0/0/1	3	0.011331	0.596626	SERINC5
5	80172317	G	14	A	44	AF=0.667	0/0/1	3	0.000100497	0.163628	MSH3
5	80598005	T	14	C	28	AF=0.667	0/0/1	3	0.0435585	1	RNU5E-1, ZCCHC9
5	80598029	G	12	C	32	AF=0.667	0/0/1	3	0.00365777	0.429182	RNU5E-1, ZCCHC9
5	80600619	C	33	G	83	AF=0.667	0/0/1	3	3.86543e-06	0.280399	RNU5E-1, ZCCHC9
5	81573992	C	110	T	43	AF=0.333	0/0/1	3	5.90809e-08	0.198037	RPS23
5	82350191	G	201	A	338	AF=0.667	0/0/1	3	3.88952e-09	0.0548173	TMEM167A
5	84827195	T	5	A	16	AF=0.667	0/0/1	3	0.0266037	0.488508	None
5	86656964	T	1	C	9	AF=0.667	0/0/1	3	0.0214844	0.180663	RASA1
5	86677220	G	14	A	35	AF=0.667	0/0/1	3	0.00380165	0.546457	RASA1
5	87491366	A	174	G	87	AF=0.333	0/0/1	3	7.80152e-08	1	TMEM161B
5	87565725	C	85	T	31	AF=0.333	0/0/1	3	5.44461e-07	0.14034	TMEM161B-AS1
5	89770768	G	84	A	167	AF=0.667	0/0/1	3	1.7708e-07	0.946701	POLR3G
5	89810077	G	73	A	32	AF=0.333	0/0/1	3	7.80842e-05	0.60502	POLR3G
5	89818998	G	28	C	9	AF=0.333	0/0/1	3	0.00256321	0.297053	LYSMD3
5	89985882	A	22	G	50	AF=0.667	0/0/1	3	0.00129358	0.708005	GPR98
5	90020923	T	6	G	24	AF=0.667	0/0/1	3	0.00143091	0.173545	GPR98
5	94798811	G	28	A	6	AF=0.333	0/0/1	3	0.000195126	0.0671695	None
5	94988482	G	70	A	27	AF=0.333	0/0/1	3	1.4767e-05	0.2821	RFESD, SPATA9
5	95070063	G	3	C	12	AF=0.667	0/0/1	3	0.0351562	0.412257	RHOBTB3
5	95084131	G	146	A	322	AF=0.667	0/0/1	3	2.67297e-16	0.351585	RHOBTB3
5	95121013	G	32	A	10	AF=0.333	0/0/1	3	0.000940674	0.251283	RHOBTB3
5	95121059	G	25	A	10	AF=0.333	0/0/1	3	0.0166738	0.596596	RHOBTB3
5	95122000	G	20	A	6	AF=0.333	0/0/1	3	0.00935531	0.30574	RHOBTB3
5	95124858	A	36	G	19	AF=0.333	0/0/1	3	0.0300289	0.886432	RHOBTB3
5	95222511	T	5	C	22	AF=0.667	0/0/1	3	0.00151372	0.150899	ELL2
5	95234350	A	17	G	38	AF=0.667	0/0/1	3	0.0064558	0.776019	ELL2
5	96118852	G	28	C	66	AF=0.667	0/0/1	3	0.000111121	0.512662	ERAP1
5	96120455	C	5	T	21	AF=0.667	0/0/1	3	0.00249392	0.148446	ERAP1
5	96126308	A	25	G	50	AF=0.667	0/0/1	3	0.00522824	1	ERAP1
5	96129512	A	27	G	67	AF=0.667	0/0/1	3	4.49643e-05	0.382408	ERAP1
5	96130836	T	12	C	38	AF=0.667	0/0/1	3	0.000305864	0.179261	ERAP1
5	96350710	G	69	A	36	AF=0.333	0/0/1	3	0.00165903	0.836323	LNPEP
5	102510923	T	1	C	12	AF=0.667	0/0/1	3	0.00341797	0.0731862	PPIP5K2
5	102545693	A	10	G	23	AF=0.667	0/0/1	3	0.035082	0.853978	None
5	102547302	C	7	T	26	AF=0.667	0/0/1	3	0.00131873	0.194851	None
5	102885995	A	37	G	16	AF=0.333	0/0/1	3	0.00548634	0.770857	NUDT12
5	102886015	A	32	G	16	AF=0.333	0/0/1	3	0.0293049	1	NUDT12
5	104201341	G	18	A	6	AF=0.333	0/0/1	3	0.0226558	0.517006	None
5	108527540	T	1	C	11	AF=0.667	0/0/1	3	0.00634766	0.0728458	None
5	109110537	T	14	A	31	AF=0.667	0/0/1	3	0.0160944	0.87466	MAN2A1
5	109181682	A	15	T	32	AF=0.667	0/0/1	3	0.0186238	1	MAN2A1
5	109182778	C	3	T	12	AF=0.667	0/0/1	3	0.0351562	0.412257	MAN2A1
5	110456263	C	53	G	146	AF=0.667	0/0/1	3	3.03255e-11	0.0502755	WDR36
5	110464393	A	127	T	210	AF=0.667	0/0/1	3	7.18206e-06	0.0936327	WDR36
5	111497328	T	23	A	7	AF=0.333	0/0/1	3	0.00522288	0.33276	EPB41L4A, EPB41L4A-AS1
5	111497330	C	23	A	7	AF=0.333	0/0/1	3	0.00522288	0.33276	EPB41L4A, EPB41L4A-AS1
5	112203564	T	78	A	33	AF=0.333	0/0/1	3	2.32627e-05	0.481149	SRP19
5	112212746	C	54	G	20	AF=0.333	0/0/1	3	9.61299e-05	0.269615	REEP5, SRP19
5	112213071	G	34	T	12	AF=0.333	0/0/1	3	0.00164149	0.349737	REEP5, SRP19
5	112252258	A	3	G	16	AF=0.667	0/0/1	3	0.00442505	0.143458	REEP5
5	112350098	C	103	T	38	AF=0.333	0/0/1	3	4.09805e-08	0.128383	DCP2
5	112354898	C	50	G	122	AF=0.667	0/0/1	3	3.95246e-08	0.257847	DCP2
5	112356649	G	3	A	19	AF=0.667	0/0/1	3	0.000855446	0.0677482	DCP2
5	114951080	T	199	G	124	AF=0.333	0/0/1	3	3.55345e-05	0.0586847	TMED7, TMED7-TICAM2
5	115420547	T	12	C	35	AF=0.667	0/0/1	3	0.00108854	0.282765	None
5	118173652	A	7	G	20	AF=0.667	0/0/1	3	0.0191573	0.541228	DTWD2
5	118484804	G	12	A	30	AF=0.667	0/0/1	3	0.0079159	0.624072	DMXL1
5	118693199	T	1	C	9	AF=0.667	0/0/1	3	0.0214844	0.180663	TNFAIP8
5	118861713	A	318	G	149	AF=0.333	0/0/1	3	3.82035e-15	0.555822	HSD17B4
5	121356189	T	183	A	79	AF=0.333	0/0/1	3	1.13232e-10	0.294745	SRFBP1
5	121367128	C	25	G	6	AF=0.333	0/0/1	3	0.00087791	0.126647	None
5	126171999	T	230	C	133	AF=0.333	0/0/1	3	4.02771e-07	0.18153	LMNB1
5	126887959	C	24	G	65	AF=0.667	0/0/1	3	1.61138e-05	0.217891	PRRC1
5	126889370	C	23	T	60	AF=0.667	0/0/1	3	5.9736e-05	0.297144	PRRC1
5	126889986	A	76	G	120	AF=0.667	0/0/1	3	0.00205177	0.11142	AJ515158, PRRC1
5	126890472	C	67	T	172	AF=0.667	0/0/1	3	7.9819e-12	0.0864469	AJ515158, PRRC1
5	126890541	T	84	C	179	AF=0.667	0/0/1	3	4.65349e-09	0.694723	AJ515158, PRRC1
5	128449644	G	27	A	45	AF=0.667	0/0/1	3	0.0443709	0.454706	ISOC1
5	130764699	A	33	T	16	AF=0.333	0/0/1	3	0.0212941	1	RAPGEF6
5	131640768	T	1	C	11	AF=0.667	0/0/1	3	0.00634766	0.0728458	SLC22A4
5	132159134	C	35	T	83	AF=0.667	0/0/1	3	1.16399e-05	0.43557	SHROOM1
5	132160057	C	108	T	230	AF=0.667	0/0/1	3	2.86014e-11	0.644374	SHROOM1
5	132334252	A	123	G	62	AF=0.333	0/0/1	3	8.6094e-06	0.937986	ZCCHC10
5	132387260	A	25	G	57	AF=0.667	0/0/1	3	0.000534721	0.640542	None
5	133324858	A	7	C	26	AF=0.667	0/0/1	3	0.00131873	0.194851	VDAC1
5	133735557	C	17	A	6	AF=0.333	0/0/1	3	0.0346897	0.516661	None
5	133956668	G	156	A	374	AF=0.667	0/0/1	3	1.12554e-21	0.0589461	SAR1B
5	134097290	A	1	C	10	AF=0.667	0/0/1	3	0.0117188	0.113886	DDX46
5	134792127	T	1	C	11	AF=0.667	0/0/1	3	0.00634766	0.0728458	None
5	135514055	A	20	G	46	AF=0.667	0/0/1	3	0.00185823	0.695682	SMAD5
5	135515738	T	25	C	65	AF=0.667	0/0/1	3	2.96645e-05	0.314164	SMAD5
5	135515956	T	67	C	21	AF=0.333	0/0/1	3	9.20308e-07	0.0697875	SMAD5
5	135515975	T	36	G	66	AF=0.667	0/0/1	3	0.00386558	0.675066	SMAD5
5	135516919	A	25	G	48	AF=0.667	0/0/1	3	0.00954221	0.901296	SMAD5
5	135851045	A	12	C	3	AF=0.333	0/0/1	3	0.0351562	0.412257	None
5	135855910	A	55	G	17	AF=0.333	0/0/1	3	8.14003e-06	0.103142	None
5	135938662	G	17	A	5	AF=0.333	0/0/1	3	0.0169005	0.369388	None
5	137523430	T	107	C	246	AF=0.667	0/0/1	3	9.89454e-14	0.258659	CDC23
5	137717213	G	43	A	117	AF=0.667	0/0/1	3	4.19151e-09	0.0932593	KDM3B
5	137735578	G	72	T	25	AF=0.333	0/0/1	3	1.91874e-06	0.131396	KDM3B
5	137754695	T	56	C	95	AF=0.667	0/0/1	3	0.00188773	0.342333	KDM3B
5	138278857	G	38	A	19	AF=0.333	0/0/1	3	0.0163481	1	None
5	138463538	G	25	C	74	AF=0.667	0/0/1	3	8.50599e-07	0.109074	SIL1
5	139044217	T	2	C	12	AF=0.667	0/0/1	3	0.0129395	0.163098	CXXC5
5	139936980	A	80	G	145	AF=0.667	0/0/1	3	1.74943e-05	0.479741	SRA1
5	139937146	G	11	A	27	AF=0.667	0/0/1	3	0.013853	0.730926	SRA1
5	139941318	A	26	G	49	AF=0.667	0/0/1	3	0.0105821	0.807087	APBB3
5	140023818	C	3	T	17	AF=0.667	0/0/1	3	0.00257683	0.0981777	TMCO6
5	140027304	T	60	C	25	AF=0.333	0/0/1	3	0.000186799	0.491213	NDUFA2
5	140041960	T	140	G	67	AF=0.333	0/0/1	3	4.30294e-07	0.825056	IK
5	140046435	A	27	G	12	AF=0.333	0/0/1	3	0.0237027	0.865497	WDR55
5	140050265	A	143	G	74	AF=0.333	0/0/1	3	3.26368e-06	0.828986	WDR55
5	140053351	G	62	C	23	AF=0.333	0/0/1	3	2.77136e-05	0.250463	None
5	140055646	G	25	T	8	AF=0.333	0/0/1	3	0.00455138	0.35591	HARS
5	140067219	A	15	T	4	AF=0.333	0/0/1	3	0.0192108	0.334181	HARS
5	140077653	G	157	C	77	AF=0.333	0/0/1	3	1.85141e-07	0.944749	HARS2
5	140086062	A	178	T	88	AF=0.333	0/0/1	3	3.6242e-08	1	ZMAT2
5	140086191	G	42	T	21	AF=0.333	0/0/1	3	0.0111414	1	ZMAT2
5	140086786	A	24	G	6	AF=0.333	0/0/1	3	0.00143091	0.173545	None
5	141022326	C	26	G	7	AF=0.333	0/0/1	3	0.00131873	0.194851	FCHSD1
5	141041779	G	48	A	18	AF=0.333	0/0/1	3	0.000287118	0.36075	ARAP3
5	141058148	C	27	G	10	AF=0.333	0/0/1	3	0.00763208	0.488121	ARAP3
5	141058719	G	4	A	19	AF=0.667	0/0/1	3	0.00259948	0.123957	ARAP3
5	141704370	A	12	C	30	AF=0.667	0/0/1	3	0.0079159	0.624072	SPRY4
5	143539572	G	115	T	245	AF=0.667	0/0/1	3	6.26003e-12	0.614978	YIPF5
5	143539785	T	65	C	120	AF=0.667	0/0/1	3	6.40401e-05	0.586032	YIPF5
5	145499996	C	1134	T	565	AF=0.333	0/0/1	3	5.26803e-44	0.979471	LARS
5	145508340	A	575	G	300	AF=0.333	0/0/1	3	9.58982e-21	0.542106	LARS
5	145508637	A	529	C	292	AF=0.333	0/0/1	3	1.09436e-16	0.170754	LARS
5	145510123	A	17	T	4	AF=0.333	0/0/1	3	0.00719738	0.245886	LARS
5	145510261	A	17	G	4	AF=0.333	0/0/1	3	0.00719738	0.245886	LARS
5	145520137	A	73	G	49	AF=0.333	0/0/1	3	0.0368775	0.12386	LARS
5	145520141	C	75	T	30	AF=0.333	0/0/1	3	1.31537e-05	0.351511	LARS
5	145520186	G	80	T	45	AF=0.333	0/0/1	3	0.00222649	0.508312	LARS
5	145528776	C	22	T	9	AF=0.333	0/0/1	3	0.0294494	0.705743	LARS
5	145539996	T	232	G	105	AF=0.333	0/0/1	3	3.75337e-12	0.41896	LARS
5	145543972	G	195	A	82	AF=0.333	0/0/1	3	8.8011e-12	0.202588	LARS
5	145665917	T	150	C	55	AF=0.333	0/0/1	3	2.27507e-11	0.0537901	RBM27
5	145668041	C	88	A	52	AF=0.333	0/0/1	3	0.0029587	0.369804	RBM27
5	145860147	T	48	C	74	AF=0.667	0/0/1	3	0.0232164	0.178308	TCERG1
5	145860193	G	58	A	98	AF=0.667	0/0/1	3	0.00170437	0.308695	TCERG1
5	145875097	A	4	G	17	AF=0.667	0/0/1	3	0.00719738	0.245886	TCERG1
5	148731218	G	101	A	166	AF=0.667	0/0/1	3	8.3321e-05	0.119372	GRPEL2
5	148740269	G	8	T	23	AF=0.667	0/0/1	3	0.0106738	0.449088	PCYOX1L
5	149113096	G	57	T	108	AF=0.667	0/0/1	3	8.80793e-05	0.741441	PPARGC1B
5	149231519	C	23	T	48	AF=0.667	0/0/1	3	0.00406512	1	PPARGC1B
5	149232307	A	8	C	23	AF=0.667	0/0/1	3	0.0106738	0.449088	PPARGC1B
5	149390148	G	20	A	56	AF=0.667	0/0/1	3	4.36893e-05	0.224121	HMGXB3
5	149410153	T	15	G	29	AF=0.667	0/0/1	3	0.0487668	0.874534	HMGXB3
5	149412778	A	4	G	16	AF=0.667	0/0/1	3	0.0118179	0.243595	HMGXB3
5	149421502	A	184	G	433	AF=0.667	0/0/1	3	4.2529e-24	0.0727184	HMGXB3
5	150277285	G	67	T	44	AF=0.333	0/0/1	3	0.0363065	0.15948	ZNF300
5	150578574	A	73	G	33	AF=0.333	0/0/1	3	0.000128221	0.681111	CCDC69
5	150847554	T	19	C	4	AF=0.333	0/0/1	3	0.00259948	0.123957	SLC36A1
5	153429459	T	82	C	51	AF=0.333	0/0/1	3	0.00903049	0.23174	MFAP3
5	153432733	T	121	C	62	AF=0.333	0/0/1	3	1.54118e-05	0.875501	MFAP3
5	153432970	C	43	T	16	AF=0.333	0/0/1	3	0.000584365	0.337336	MFAP3
5	153434018	T	20	C	7	AF=0.333	0/0/1	3	0.0191573	0.541228	MFAP3
5	154267288	A	97	G	50	AF=0.333	0/0/1	3	0.00013136	0.861281	GEMIN5
5	157167317	C	47	G	26	AF=0.333	0/0/1	3	0.0186178	0.709812	AK000953
5	157183739	G	19	A	7	AF=0.333	0/0/1	3	0.0289593	0.541009	AK023159, LSM11
5	157183770	C	19	T	7	AF=0.333	0/0/1	3	0.0289593	0.541009	AK023159
5	162902516	T	251	C	471	AF=0.667	0/0/1	3	2.13894e-16	0.407133	HMMR
5	162909716	C	134	T	231	AF=0.667	0/0/1	3	4.33991e-07	0.16551	BC035392, HMMR
5	167943827	G	354	A	187	AF=0.333	0/0/1	3	6.30351e-13	0.553211	RARS
5	167980525	A	82	G	35	AF=0.333	0/0/1	3	1.65041e-05	0.49262	None
5	167983347	T	52	C	30	AF=0.333	0/0/1	3	0.0198269	0.558333	PANK3
5	169454941	C	28	G	58	AF=0.667	0/0/1	3	0.00160556	1	DOCK2
5	169461547	C	24	T	65	AF=0.667	0/0/1	3	1.61138e-05	0.217891	DOCK2
5	169483706	C	59	T	27	AF=0.333	0/0/1	3	0.00073171	0.819104	DOCK2
5	169510020	T	81	G	46	AF=0.333	0/0/1	3	0.00241755	0.510073	DOCK2
5	169510023	A	85	G	48	AF=0.333	0/0/1	3	0.00169432	0.519765	DOCK2
5	169724767	G	19	C	62	AF=0.667	0/0/1	3	1.77307e-06	0.0601551	LCP2
5	169762079	G	2	C	11	AF=0.667	0/0/1	3	0.0224609	0.242342	LOC257358
5	170818252	G	32	A	11	AF=0.333	0/0/1	3	0.00191396	0.333459	NPM1
5	172196752	A	100	G	57	AF=0.333	0/0/1	3	0.000749883	0.446145	DUSP1
5	172197790	C	60	T	22	AF=0.333	0/0/1	3	3.23171e-05	0.241948	AK316321, DUSP1
5	172198197	G	38	A	10	AF=0.333	0/0/1	3	6.16964e-05	0.0677954	AK316321, DUSP1
5	172749313	C	10	A	31	AF=0.667	0/0/1	3	0.00145049	0.250282	STC2
5	173039880	C	2	T	11	AF=0.667	0/0/1	3	0.0224609	0.242342	BOD1
5	173041981	T	1	C	12	AF=0.667	0/0/1	3	0.00341797	0.0731862	BOD1
5	175612177	G	27	A	51	AF=0.667	0/0/1	3	0.00877171	0.810734	LOC643201
5	175717216	C	28	T	49	AF=0.667	0/0/1	3	0.0220335	0.548386	C5orf25, SIMC1
5	175772208	C	22	T	62	AF=0.667	0/0/1	3	1.4656e-05	0.202478	SIMC1
5	175784337	C	2	A	12	AF=0.667	0/0/1	3	0.0129395	0.163098	KIAA1191
5	175816212	C	30	A	14	AF=0.333	0/0/1	3	0.0226288	1	HIGD2A
5	175934158	G	171	C	86	AF=0.333	0/0/1	3	1.24638e-07	0.947323	FAF2
5	176378574	G	113	T	43	AF=0.333	0/0/1	3	1.92746e-08	0.148415	UIMC1
5	176481392	A	37	T	19	AF=0.333	0/0/1	3	0.0222414	0.888369	ZNF346
5	176492883	T	37	G	11	AF=0.333	0/0/1	3	0.000222245	0.167119	ZNF346
5	176516953	A	2	G	10	AF=0.667	0/0/1	3	0.0385742	0.358815	FGFR4
5	176637192	T	7	C	22	AF=0.667	0/0/1	3	0.00813006	0.331762	NSD1
5	176733341	A	15	G	33	AF=0.667	0/0/1	3	0.0132833	0.878591	MXD3, PRELID1
5	176980904	G	85	A	51	AF=0.333	0/0/1	3	0.00448125	0.317043	FAM193B
5	176981469	C	4	T	15	AF=0.667	0/0/1	3	0.0192108	0.334181	FAM193B
5	178179234	A	7	G	21	AF=0.667	0/0/1	3	0.012541	0.42593	None
5	178179951	C	3	T	19	AF=0.667	0/0/1	3	0.000855446	0.0677482	None
5	178179988	T	3	G	18	AF=0.667	0/0/1	3	0.00148964	0.067485	None
5	178249763	C	22	T	5	AF=0.333	0/0/1	3	0.00151372	0.150899	None
5	179036608	T	55	A	17	AF=0.333	0/0/1	3	8.14003e-06	0.103142	RUFY1
5	179043426	C	129	T	63	AF=0.333	0/0/1	3	2.18387e-06	0.93902	HNRNPH1
5	179043465	G	125	A	71	AF=0.333	0/0/1	3	0.000140232	0.40457	HNRNPH1
5	179043647	T	171	G	77	AF=0.333	0/0/1	3	2.28113e-09	0.500524	HNRNPH1
5	179048449	T	241	G	129	AF=0.333	0/0/1	3	6.09882e-09	0.544067	HNRNPH1
5	179049329	G	76	A	177	AF=0.667	0/0/1	3	1.87043e-10	0.286307	HNRNPH1
5	179498658	G	76	T	30	AF=0.333	0/0/1	3	9.10266e-06	0.303541	RNF130
5	179983602	T	1	C	10	AF=0.667	0/0/1	3	0.0117188	0.113886	CNOT6
5	179998454	C	9	T	22	AF=0.667	0/0/1	3	0.0294494	0.705743	CNOT6
5	180481998	T	87	G	198	AF=0.667	0/0/1	3	4.12768e-11	0.345964	BTNL9
5	180486224	T	44	G	87	AF=0.667	0/0/1	3	0.000215777	0.926432	BTNL9
5	180487905	T	101	C	161	AF=0.667	0/0/1	3	0.000252665	0.0766686	BTNL9
5	180690742	C	129	G	66	AF=0.333	0/0/1	3	7.57754e-06	0.879351	LOC100507602
5	180690937	G	32	A	17	AF=0.333	0/0/1	3	0.0443842	0.879757	LOC100507602
6	349343	T	26	A	64	AF=0.75	0/0/0/1	4	7.65707e-05	0.395009	DUSP22
6	350829	G	51	A	15	AF=0.25	0/0/0/1	4	1.00961e-05	0.776625	DUSP22
6	570969	A	0	G	10	AF=0.75	0/0/0/1	4	0.00195312	0.0760412	EXOC2
6	2366199	G	0	A	11	AF=0.75	0/0/0/1	4	0.000976562	0.0765626	LOC100508120
6	2366325	G	0	A	11	AF=0.75	0/0/0/1	4	0.000976562	0.0765626	LOC100508120
6	2836266	T	2	A	17	AF=0.75	0/0/0/1	4	0.000728607	0.188802	SERPINB1
6	2888213	G	65	A	15	AF=0.25	0/0/0/1	4	1.41147e-08	0.24461	AY927512, SERPINB9
6	2958095	A	0	G	11	AF=0.75	0/0/0/1	4	0.000976562	0.0765626	SERPINB6
6	2959513	C	230	T	626	AF=0.75	0/0/0/1	4	4.46075e-43	0.206717	SERPINB6
6	2961042	T	10	G	45	AF=0.75	0/0/0/1	4	2.05726e-06	0.278279	SERPINB6
6	2966681	C	9	T	45	AF=0.75	0/0/0/1	4	7.28843e-07	0.207458	SERPINB6
6	2968318	T	0	C	11	AF=0.75	0/0/0/1	4	0.000976562	0.0765626	SERPINB6
6	2968440	A	5	T	22	AF=0.75	0/0/0/1	4	0.00151372	0.512998	SERPINB6
6	2971261	T	5	C	20	AF=0.75	0/0/0/1	4	0.00407732	0.651772	SERPINB6
6	2989582	T	1	G	12	AF=0.75	0/0/0/1	4	0.00341797	0.206918	DKFZP686I15217, NQO2
6	2990373	C	18	T	57	AF=0.75	0/0/0/1	4	7.24416e-06	1	DKFZP686I15217, NQO2
6	2990985	T	21	C	78	AF=0.75	0/0/0/1	4	6.88232e-09	0.41864	DKFZP686I15217, NQO2
6	3010459	C	5	T	18	AF=0.75	0/0/0/1	4	0.010622	1	NQO2
6	3017495	G	112	A	37	AF=0.25	0/0/0/1	4	5.79405e-10	1	NQO2
6	3018811	T	45	A	23	AF=0.25	0/0/0/1	4	0.0103377	0.0943878	NQO2
6	3018982	T	8	G	27	AF=0.75	0/0/0/1	4	0.00187823	1	NQO2
6	3020792	G	39	A	102	AF=0.75	0/0/0/1	4	1.10422e-07	0.495844	HTATSF1P2
6	3027173	T	24	C	5	AF=0.25	0/0/0/1	4	0.000546113	0.397994	None
6	3104696	C	0	T	10	AF=0.75	0/0/0/1	4	0.00195312	0.0760412	RIPK1
6	3720210	A	9	G	44	AF=0.75	0/0/0/1	4	1.22085e-06	0.205962	None
6	3720242	A	9	G	34	AF=0.75	0/0/0/1	4	0.000170155	0.60203	None
6	4064404	C	49	G	17	AF=0.25	0/0/0/1	4	0.000101477	0.887207	FAM217A, PRPF4B
6	4116262	G	128	A	376	AF=0.75	0/0/0/1	4	2.5292e-29	0.83704	C6orf201, ECI2
6	4119704	G	0	A	10	AF=0.75	0/0/0/1	4	0.00195312	0.0760412	C6orf201, ECI2
6	4122249	C	1	A	11	AF=0.75	0/0/0/1	4	0.00634766	0.316025	C6orf201, ECI2
6	5108485	G	21	T	9	AF=0.25	0/0/0/1	4	0.0427739	0.528999	AK094934
6	5109119	T	180	C	62	AF=0.25	0/0/0/1	4	1.60619e-14	0.823883	AK094934, LYRM4
6	6563482	C	1	G	14	AF=0.75	0/0/0/1	4	0.000976562	0.136801	LY86-AS1
6	6563505	T	1	C	14	AF=0.75	0/0/0/1	4	0.000976562	0.136801	LY86-AS1
6	7156736	C	0	T	11	AF=0.75	0/0/0/1	4	0.000976562	0.0765626	RREB1
6	7250960	G	32	A	109	AF=0.75	0/0/0/1	4	5.02296e-11	0.561066	RREB1
6	7251037	C	35	T	74	AF=0.75	0/0/0/1	4	0.000237468	0.0965913	RREB1
6	7287579	T	37	G	18	AF=0.25	0/0/0/1	4	0.0144538	0.211711	SSR1
6	7313338	G	641	C	239	AF=0.25	0/0/0/1	4	3.87269e-43	0.139212	SSR1
6	7390077	C	81	T	223	AF=0.75	0/0/0/1	4	1.69174e-16	0.508004	RIOK1
6	7393452	C	377	T	123	AF=0.25	0/0/0/1	4	5.23427e-31	0.876918	RIOK1
6	7408678	A	13	G	3	AF=0.25	0/0/0/1	4	0.0212708	0.774801	RIOK1
6	8081021	G	57	A	186	AF=0.75	0/0/0/1	4	3.76002e-17	0.604921	EEF1E1, EEF1E1-MUTED
6	8082703	G	32	A	122	AF=0.75	0/0/0/1	4	1.40113e-13	0.263873	EEF1E1, EEF1E1-MUTED
6	8084650	T	191	C	57	AF=0.25	0/0/0/1	4	4.34152e-18	0.509397	EEF1E1, EEF1E1-MUTED
6	8084877	C	102	T	46	AF=0.25	0/0/0/1	4	4.80527e-06	0.0882383	EEF1E1, EEF1E1-MUTED
6	8088264	G	31	A	9	AF=0.25	0/0/0/1	4	0.000679548	0.855636	EEF1E1, EEF1E1-MUTED
6	8089194	A	73	G	18	AF=0.25	0/0/0/1	4	5.00949e-09	0.27748	EEF1E1, EEF1E1-MUTED
6	10731218	C	1823	T	567	AF=0.25	0/0/0/1	4	9.09859e-153	0.156396	TMEM14C
6	10906256	A	59	G	10	AF=0.25	0/0/0/1	4	1.37652e-09	0.0505113	SYCP2L
6	10976212	A	1	C	9	AF=0.75	0/0/0/1	4	0.0214844	0.46815	None
6	10976218	G	1	A	10	AF=0.75	0/0/0/1	4	0.0117188	0.311724	None
6	11724542	A	1	G	11	AF=0.75	0/0/0/1	4	0.00634766	0.316025	ADTRP
6	11729299	C	7	T	26	AF=0.75	0/0/0/1	4	0.00131873	0.692949	ADTRP
6	11731863	C	12	T	30	AF=0.75	0/0/0/1	4	0.0079159	0.594199	ADTRP
6	11731887	A	12	C	30	AF=0.75	0/0/0/1	4	0.0079159	0.594199	ADTRP
6	11732787	G	1	A	18	AF=0.75	0/0/0/1	4	7.62939e-05	0.0597552	ADTRP
6	13301917	C	0	G	11	AF=0.75	0/0/0/1	4	0.000976562	0.0765626	TBC1D7
6	13328651	G	33	C	85	AF=0.75	0/0/0/1	4	1.84304e-06	0.457385	TBC1D7
6	13328717	C	44	G	139	AF=0.75	0/0/0/1	4	1.12048e-12	0.798561	TBC1D7
6	13599303	C	13	T	64	AF=0.75	0/0/0/1	4	3.02363e-09	0.114066	SIRT5
6	13601528	T	1	C	13	AF=0.75	0/0/0/1	4	0.00183105	0.212637	SIRT5
6	13610907	A	0	C	10	AF=0.75	0/0/0/1	4	0.00195312	0.0760412	SIRT5
6	13612803	C	2	T	14	AF=0.75	0/0/0/1	4	0.00418091	0.386766	SIRT5
6	13613311	C	12	T	36	AF=0.75	0/0/0/1	4	0.00071727	1	SIRT5
6	13620733	A	0	C	11	AF=0.75	0/0/0/1	4	0.000976562	0.0765626	NOL7
6	13790393	C	69	G	26	AF=0.25	0/0/0/1	4	1.18281e-05	0.635415	MCUR1
6	13801615	T	351	C	110	AF=0.25	0/0/0/1	4	2.17306e-30	0.591157	MCUR1
6	13975670	C	0	T	11	AF=0.75	0/0/0/1	4	0.000976562	0.0765626	RNF182
6	13978618	C	3	G	21	AF=0.75	0/0/0/1	4	0.000277162	0.236337	RNF182
6	14870222	C	0	G	10	AF=0.75	0/0/0/1	4	0.00195312	0.0760412	None
6	14870328	G	0	A	10	AF=0.75	0/0/0/1	4	0.00195312	0.0760412	None
6	14914464	G	0	A	10	AF=0.75	0/0/0/1	4	0.00195312	0.0760412	None
6	15272718	T	0	C	11	AF=0.75	0/0/0/1	4	0.000976562	0.0765626	JARID2
6	15511581	G	19	A	64	AF=0.75	0/0/0/1	4	7.39153e-07	0.705788	JARID2
6	15663118	T	45	C	174	AF=0.75	0/0/0/1	4	4.30216e-19	0.138232	DTNBP1
6	17658333	G	0	T	11	AF=0.75	0/0/0/1	4	0.000976562	0.0765626	NUP153
6	17661560	C	1	T	9	AF=0.75	0/0/0/1	4	0.0214844	0.46815	NUP153
6	17675246	T	83	C	238	AF=0.75	0/0/0/1	4	1.73351e-18	0.747238	NUP153
6	17760540	A	22	G	72	AF=0.75	0/0/0/1	4	2.2606e-07	0.811985	KIF13A
6	17762801	C	0	G	10	AF=0.75	0/0/0/1	4	0.00195312	0.0760412	KIF13A
6	17764211	A	3	G	17	AF=0.75	0/0/0/1	4	0.00257683	0.439374	KIF13A
6	17799575	A	103	G	33	AF=0.25	0/0/0/1	4	1.41957e-09	0.921207	KIF13A
6	17816551	A	10	T	23	AF=0.75	0/0/0/1	4	0.035082	0.545782	KIF13A
6	17823077	G	0	C	11	AF=0.75	0/0/0/1	4	0.000976562	0.0765626	KIF13A
6	18133256	G	1	A	15	AF=0.75	0/0/0/1	4	0.000518799	0.143034	TPMT
6	20109956	A	17	G	62	AF=0.75	0/0/0/1	4	3.58836e-07	0.518673	MBOAT1
6	20428585	G	3	C	23	AF=0.75	0/0/0/1	4	8.79765e-05	0.171043	E2F3
6	20717255	T	18	C	5	AF=0.25	0/0/0/1	4	0.010622	1	CDKAL1
6	21157016	A	0	G	11	AF=0.75	0/0/0/1	4	0.000976562	0.0765626	CDKAL1
6	21201493	G	51	A	10	AF=0.25	0/0/0/1	4	9.62443e-08	0.139436	CDKAL1
6	24419200	C	24	T	53	AF=0.75	0/0/0/1	4	0.00126323	0.235461	MRS2
6	24666007	T	4	G	22	AF=0.75	0/0/0/1	4	0.000533521	0.364811	TDP2
6	24667323	C	69	T	181	AF=0.75	0/0/0/1	4	9.18503e-13	0.342736	ACOT13
6	24687765	A	0	G	11	AF=0.75	0/0/0/1	4	0.000976562	0.0765626	ACOT13
6	24710920	A	28	G	58	AF=0.75	0/0/0/1	4	0.00160556	0.106684	C6orf62
6	24775181	G	153	T	474	AF=0.75	0/0/0/1	4	4.00227e-39	0.747083	GMNN
6	24780263	A	13	G	53	AF=0.75	0/0/0/1	4	7.23718e-07	0.393757	GMNN
6	25967068	C	112	T	45	AF=0.25	0/0/0/1	4	8.9224e-08	0.310374	TRIM38
6	26113398	T	30	A	8	AF=0.25	0/0/0/1	4	0.000471987	0.708804	None
6	26113616	T	224	A	61	AF=0.25	0/0/0/1	4	4.7166e-23	0.171469	None
6	26113994	T	196	G	53	AF=0.25	0/0/0/1	4	1.79535e-20	0.188019	None
6	26114653	G	31	A	106	AF=0.75	0/0/0/1	4	8.53974e-11	0.555438	HIST1H2BC
6	26125711	A	47	C	13	AF=0.25	0/0/0/1	4	1.21467e-05	0.655275	HIST1H2AC
6	26126779	G	5	A	34	AF=0.75	0/0/0/1	4	2.42991e-06	0.0950817	HIST1H2AC
6	26127184	C	26	T	6	AF=0.25	0/0/0/1	4	0.000535053	0.541213	HIST1H2AC
6	26128618	A	29	G	9	AF=0.25	0/0/0/1	4	0.00165805	1	HIST1H2AC
6	26132218	A	6	G	29	AF=0.75	0/0/0/1	4	0.000116842	0.334091	HIST1H2AC
6	26279235	G	13	C	36	AF=0.75	0/0/0/1	4	0.00140269	0.868907	None
6	26282322	T	17	C	37	AF=0.75	0/0/0/1	4	0.00907334	0.272885	HIST1H4H
6	26285560	A	301	G	966	AF=0.75	0/0/0/1	4	1.44392e-81	0.314715	HIST1H4H
6	26290673	G	5	T	21	AF=0.75	0/0/0/1	4	0.00249392	0.65199	None
6	26298953	A	1	G	14	AF=0.75	0/0/0/1	4	0.000976562	0.136801	None
6	26391394	G	7	A	26	AF=0.75	0/0/0/1	4	0.00131873	0.692949	BTN2A2
6	26391395	A	7	G	26	AF=0.75	0/0/0/1	4	0.00131873	0.692949	BTN2A2
6	26392515	G	5	C	24	AF=0.75	0/0/0/1	4	0.000546113	0.397994	BTN2A2
6	27326863	G	15	A	57	AF=0.75	0/0/0/1	4	6.53997e-07	0.496536	ZNF204P
6	27327349	C	7	G	23	AF=0.75	0/0/0/1	4	0.00522288	1	ZNF204P
6	27370046	T	30	G	14	AF=0.25	0/0/0/1	4	0.0226288	0.298081	None
6	27371011	C	48	T	21	AF=0.25	0/0/0/1	4	0.00155032	0.329763	None
6	27418847	T	43	G	8	AF=0.25	0/0/0/1	4	6.86712e-07	0.145931	ZNF184
6	27425185	C	37	A	20	AF=0.25	0/0/0/1	4	0.033144	0.0915025	ZNF184
6	27917649	G	25	A	6	AF=0.25	0/0/0/1	4	0.00087791	0.540735	None
6	33545340	G	64	A	250	AF=0.75	0/0/0/1	4	4.04184e-27	0.058917	BAK1
6	33599979	C	0	T	10	AF=0.75	0/0/0/1	4	0.00195312	0.0760412	ITPR3
6	33599993	T	0	A	10	AF=0.75	0/0/0/1	4	0.00195312	0.0760412	ITPR3
6	33643558	G	35	A	90	AF=0.75	0/0/0/1	4	9.23998e-07	0.469439	ITPR3
6	33659793	G	31	A	8	AF=0.25	0/0/0/1	4	0.000294077	0.584406	ITPR3
6	33660188	T	23	C	7	AF=0.25	0/0/0/1	4	0.00522288	1	ITPR3
6	33663055	G	4	A	29	AF=0.75	0/0/0/1	4	1.09286e-05	0.107029	ITPR3, SBP1
6	33664730	T	32	C	8	AF=0.25	0/0/0/1	4	0.000182166	0.584688	MNF1, SBP1
6	33667117	C	20	G	4	AF=0.25	0/0/0/1	4	0.00154388	0.480444	MNF1
6	33667199	A	44	G	13	AF=0.25	0/0/0/1	4	4.71044e-05	0.762177	MNF1
6	33740025	C	196	T	52	AF=0.25	0/0/0/1	4	7.59102e-21	0.163227	LEMD2
6	33754301	T	3	C	20	AF=0.75	0/0/0/1	4	0.000488281	0.23328	LEMD2
6	33755890	T	62	C	13	AF=0.25	0/0/0/1	4	8.39601e-09	0.142629	LEMD2
6	33756532	G	11	A	54	AF=0.75	0/0/0/1	4	6.02754e-08	0.152433	LEMD2
6	34204285	G	2	A	15	AF=0.75	0/0/0/1	4	0.00234985	0.270784	None
6	34214348	C	47	T	20	AF=0.25	0/0/0/1	4	0.00130717	0.396682	C6orf1
6	34388510	G	4	A	16	AF=0.75	0/0/0/1	4	0.0118179	0.797669	RPS10, RPS10-NUDT3
6	34664207	T	0	G	11	AF=0.75	0/0/0/1	4	0.000976562	0.0765626	C6orf106
6	34739649	A	24	G	9	AF=0.25	0/0/0/1	4	0.013531	0.84057	SNRPC
6	35259488	A	59	G	23	AF=0.25	0/0/0/1	4	8.71548e-05	0.524474	ZNF76
6	35383624	T	1	C	13	AF=0.75	0/0/0/1	4	0.00183105	0.212637	PPARD
6	35383699	A	0	G	11	AF=0.75	0/0/0/1	4	0.000976562	0.0765626	PPARD
6	35395010	C	15	T	4	AF=0.25	0/0/0/1	4	0.0192108	1	PPARD
6	35995633	A	102	G	32	AF=0.25	0/0/0/1	4	1.0414e-09	0.842025	MAPK14
6	36076280	C	263	T	97	AF=0.25	0/0/0/1	4	8.05549e-19	0.39441	MAPK14
6	36126650	A	0	G	10	AF=0.75	0/0/0/1	4	0.00195312	0.0760412	BC042825
6	36444893	A	21	G	7	AF=0.25	0/0/0/1	4	0.012541	1	KCTD20
6	36824399	C	305	T	877	AF=0.75	0/0/0/1	4	1.59801e-64	0.523435	PPIL1
6	36841689	A	0	T	11	AF=0.75	0/0/0/1	4	0.000976562	0.0765626	C6orf89, PPIL1
6	36854693	A	1	G	16	AF=0.75	0/0/0/1	4	0.000274658	0.0903498	C6orf89
6	36882353	A	450	G	147	AF=0.25	0/0/0/1	4	1.12276e-36	0.850221	C6orf89
6	36884490	C	1	T	13	AF=0.75	0/0/0/1	4	0.00183105	0.212637	C6orf89
6	36887308	G	37	A	11	AF=0.25	0/0/0/1	4	0.000222245	0.868016	C6orf89
6	36891644	T	204	C	61	AF=0.25	0/0/0/1	4	3.42589e-19	0.478922	C6orf89
6	36948246	C	17	T	5	AF=0.25	0/0/0/1	4	0.0169005	1	MTCH1
6	37262638	G	5	A	16	AF=0.75	0/0/0/1	4	0.0266037	1	TBC1D22B
6	37451758	G	0	C	11	AF=0.75	0/0/0/1	4	0.000976562	0.0765626	CCDC167
6	37820821	T	4	C	18	AF=0.75	0/0/0/1	4	0.00434351	0.624116	ZFAND3
6	38800164	G	2	A	22	AF=0.75	0/0/0/1	4	3.5882e-05	0.0611394	DNAH8
6	39072334	T	21	A	7	AF=0.25	0/0/0/1	4	0.012541	1	SAYSD1
6	39153541	C	17	T	5	AF=0.25	0/0/0/1	4	0.0169005	1	None
6	39869952	T	0	A	10	AF=0.75	0/0/0/1	4	0.00195312	0.0760412	DAAM2
6	41544494	A	0	G	10	AF=0.75	0/0/0/1	4	0.00195312	0.0760412	FOXP4
6	41559861	C	3	A	13	AF=0.75	0/0/0/1	4	0.0212708	0.774801	FOXP4
6	41739173	C	6	T	18	AF=0.75	0/0/0/1	4	0.0226558	1	FRS3
6	41761495	T	4	C	14	AF=0.75	0/0/0/1	4	0.0308838	1	None
6	41888827	C	64	G	192	AF=0.75	0/0/0/1	4	4.8971e-16	1	MED20
6	41892809	G	0	T	11	AF=0.75	0/0/0/1	4	0.000976562	0.0765626	BYSL
6	41905174	T	4	A	22	AF=0.75	0/0/0/1	4	0.000533521	0.364811	CCND3
6	42025058	G	0	A	11	AF=0.75	0/0/0/1	4	0.000976562	0.0765626	TAF8
6	42025402	A	15	G	46	AF=0.75	0/0/0/1	4	8.83756e-05	1	TAF8
6	42164270	T	8	C	21	AF=0.75	0/0/0/1	4	0.0241195	0.83007	None
6	42168542	T	31	C	14	AF=0.25	0/0/0/1	4	0.0160944	0.38845	None
6	42168601	A	30	C	14	AF=0.25	0/0/0/1	4	0.0226288	0.298081	None
6	42174611	G	86	T	38	AF=0.25	0/0/0/1	4	1.94519e-05	0.147354	MRPS10
6	42175063	A	339	G	110	AF=0.25	0/0/0/1	4	3.279e-28	0.827685	MRPS10
6	42185564	A	172	C	518	AF=0.75	0/0/0/1	4	3.8168e-41	1	MRPS10
6	42600319	A	36	G	96	AF=0.75	0/0/0/1	4	1.74937e-07	0.546929	UBR2
6	42627430	C	22	T	100	AF=0.75	0/0/0/1	4	4.50886e-13	0.0762198	UBR2
6	42630486	T	4	C	16	AF=0.75	0/0/0/1	4	0.0118179	0.797669	UBR2
6	42643096	A	11	G	28	AF=0.75	0/0/0/1	4	0.0094753	0.711271	UBR2
6	42849523	A	2	T	22	AF=0.75	0/0/0/1	4	3.5882e-05	0.0611394	RPL7L1
6	42850659	C	8	A	25	AF=0.75	0/0/0/1	4	0.00455138	1	RPL7L1
6	42850919	G	6	T	29	AF=0.75	0/0/0/1	4	0.000116842	0.334091	RPL7L1
6	42903763	C	13	G	65	AF=0.75	0/0/0/1	4	1.8077e-09	0.115367	CNPY3
6	42906384	G	141	T	386	AF=0.75	0/0/0/1	4	2.39266e-27	0.365168	CNPY3
6	42910666	T	12	C	29	AF=0.75	0/0/0/1	4	0.0115078	0.588028	None
6	42944773	T	30	C	83	AF=0.75	0/0/0/1	4	6.30672e-07	0.744438	PEX6
6	43014298	T	11	C	57	AF=0.75	0/0/0/1	4	1.275e-08	0.122018	CUL7, KLC4
6	43014299	T	12	C	57	AF=0.75	0/0/0/1	4	3.74225e-08	0.165029	CUL7, KLC4
6	43426685	G	4	A	19	AF=0.75	0/0/0/1	4	0.00259948	0.479516	None
6	43472708	T	123	C	42	AF=0.25	0/0/0/1	4	2.03927e-10	0.92836	TJAP1
6	43484643	G	115	A	37	AF=0.25	0/0/0/1	4	1.66324e-10	0.925449	YIPF3
6	43487363	A	98	C	28	AF=0.25	0/0/0/1	4	2.68763e-10	0.537298	POLR1C
6	43498381	A	33	G	14	AF=0.25	0/0/0/1	4	0.00794273	0.499868	XPO5
6	43582584	C	35	T	9	AF=0.25	0/0/0/1	4	0.000106045	0.602255	POLH
6	43584152	A	46	G	24	AF=0.25	0/0/0/1	4	0.0115264	0.0961986	POLH
6	43605219	G	48	A	22	AF=0.25	0/0/0/1	4	0.00254756	0.215459	MAD2L1BP
6	43738350	C	429	G	142	AF=0.25	0/0/0/1	4	1.83097e-34	1	VEGFA
6	43738977	C	506	T	157	AF=0.25	0/0/0/1	4	1.11384e-43	0.446157	VEGFA
6	43742419	G	1	C	9	AF=0.75	0/0/0/1	4	0.0214844	0.46815	VEGFA
6	43750551	C	1	G	13	AF=0.75	0/0/0/1	4	0.00183105	0.212637	VEGFA
6	43750556	G	1	A	11	AF=0.75	0/0/0/1	4	0.00634766	0.316025	VEGFA
6	43750587	G	0	C	10	AF=0.75	0/0/0/1	4	0.00195312	0.0760412	VEGFA
6	43752536	C	193	T	496	AF=0.75	0/0/0/1	4	1.24301e-31	0.0712247	VEGFA
6	44022395	T	0	C	11	AF=0.75	0/0/0/1	4	0.000976562	0.0765626	AK024736
6	44079216	T	25	C	5	AF=0.25	0/0/0/1	4	0.000324914	0.399191	None
6	44203834	T	0	A	11	AF=0.75	0/0/0/1	4	0.000976562	0.0765626	None
6	44218523	C	13	T	44	AF=0.75	0/0/0/1	4	4.71044e-05	0.762177	HSP90AB1
6	44220394	C	19	T	71	AF=0.75	0/0/0/1	4	3.12718e-08	0.465379	HSP90AB1
6	44223010	G	522	T	162	AF=0.25	0/0/0/1	4	5.30096e-45	0.452929	SLC35B2
6	45209486	C	0	T	11	AF=0.75	0/0/0/1	4	0.000976562	0.0765626	SUPT3H
6	47445789	A	62	C	21	AF=0.25	0/0/0/1	4	7.50533e-06	1	CD2AP
6	49584680	C	0	T	10	AF=0.75	0/0/0/1	4	0.00195312	0.0760412	RHAG
6	49602760	A	0	G	10	AF=0.75	0/0/0/1	4	0.00195312	0.0760412	RHAG
6	49914852	T	14	G	3	AF=0.25	0/0/0/1	4	0.0127258	0.587712	DEFB133
6	52868528	A	43	T	13	AF=0.333	0/0/0/1	3	7.33322e-05	0.119918	ICK
6	70407465	A	163	T	76	AF=0.333	0/0/0/1	3	1.86724e-08	0.680568	LMBRD1
6	71106097	T	25	A	11	AF=0.333	0/0/0/1	3	0.0288167	0.860092	None
6	71107010	A	43	G	22	AF=0.333	0/0/0/1	3	0.0125025	0.896187	None
6	71277896	A	50	C	16	AF=0.333	0/0/0/1	3	3.32824e-05	0.15004	C6orf57
6	71278236	C	57	T	17	AF=0.333	0/0/0/1	3	3.39717e-06	0.0642632	C6orf57
6	71279264	G	4	A	17	AF=0.667	0/0/0/1	3	0.00719738	0.245886	C6orf57
6	71280428	C	37	G	18	AF=0.333	0/0/0/1	3	0.0144538	1	C6orf57
6	71280594	T	26	A	9	AF=0.333	0/0/0/1	3	0.00598812	0.376264	C6orf57
6	73979268	C	16	T	42	AF=0.667	0/0/0/1	3	0.000861782	0.404901	AL832252, BC031876, KHDC1
6	73984343	A	31	C	62	AF=0.667	0/0/0/1	3	0.00171276	1	AL832252, BC031876, C6orf147, KHDC1
6	73985641	C	2	T	14	AF=0.667	0/0/0/1	3	0.00418091	0.109353	AL832252, BC031876, C6orf147, KHDC1
6	75962953	G	35	A	76	AF=0.667	0/0/0/1	3	0.000124656	0.762836	TMEM30A
6	75994151	A	92	G	40	AF=0.333	0/0/0/1	3	6.97467e-06	0.518294	TMEM30A
6	76376552	G	190	A	101	AF=0.333	0/0/0/1	3	2.01663e-07	0.619	SENP6
6	76624741	C	47	T	18	AF=0.333	0/0/0/1	3	0.00042213	0.360489	MYO6
6	76629012	A	1	G	11	AF=0.667	0/0/0/1	3	0.00634766	0.0728458	MYO6
6	80722007	C	2	A	11	AF=0.667	0/0/0/1	3	0.0224609	0.242342	TTK
6	81054663	C	19	G	55	AF=0.667	0/0/0/1	3	3.37681e-05	0.176539	BCKDHB
6	81055396	G	32	A	55	AF=0.667	0/0/0/1	3	0.0178276	0.496153	BCKDHB
6	82887693	C	13	A	3	AF=0.333	0/0/0/1	3	0.0212708	0.292529	IBTK
6	82933309	C	27	T	10	AF=0.333	0/0/0/1	3	0.00763208	0.488121	IBTK
6	85445373	C	28	T	49	AF=0.667	0/0/0/1	3	0.0220335	0.548386	TBX18
6	88111747	A	13	T	3	AF=0.333	0/0/0/1	3	0.0212708	0.292529	None
6	88111772	G	3	C	13	AF=0.667	0/0/0/1	3	0.0212708	0.292529	None
6	88221892	T	52	G	26	AF=0.333	0/0/0/1	3	0.00433488	1	SLC35A1
6	88224164	T	52	C	15	AF=0.333	0/0/0/1	3	6.45907e-06	0.068792	RARS2
6	90036511	C	15	T	45	AF=0.667	0/0/0/1	3	0.000134514	0.217153	UBE2J1
6	90038800	C	95	T	37	AF=0.333	0/0/0/1	3	4.63854e-07	0.229794	UBE2J1
6	90039670	G	176	C	295	AF=0.667	0/0/0/1	3	4.62194e-08	0.0632417	UBE2J1
6	90371215	T	57	C	126	AF=0.667	0/0/0/1	3	3.67165e-07	0.583257	MDN1
6	90497589	A	93	C	31	AF=0.333	0/0/0/1	3	2.20057e-08	0.0562765	MDN1
6	97339013	A	523	C	285	AF=0.333	0/0/0/1	3	4.52381e-17	0.232588	NDUFAF4
6	97613163	T	26	C	5	AF=0.333	0/0/0/1	3	0.000192195	0.0547235	MIR548H3, MMS22L
6	97677118	G	18	A	44	AF=0.667	0/0/0/1	3	0.001299	0.504334	MIR548H3, MMS22L
6	97708455	T	66	C	29	AF=0.333	0/0/0/1	3	0.000186402	0.663366	MIR548H3, MMS22L
6	99318195	C	44	T	22	AF=0.333	0/0/0/1	3	0.00921049	1	None
6	99842056	C	23	A	72	AF=0.667	0/0/0/1	3	4.75748e-07	0.0642368	COQ3
6	99850730	C	104	T	255	AF=0.667	0/0/0/1	3	9.14104e-16	0.0827967	PNISR
6	99851977	T	106	C	39	AF=0.333	0/0/0/1	3	2.403e-08	0.112631	PNISR
6	99859675	T	19	G	50	AF=0.667	0/0/0/1	3	0.000244397	0.371435	PNISR
6	99878855	C	22	G	6	AF=0.333	0/0/0/1	3	0.00371917	0.230206	None
6	99880839	T	12	A	33	AF=0.667	0/0/0/1	3	0.0024589	0.42947	USP45
6	99882077	C	15	T	4	AF=0.333	0/0/0/1	3	0.0192108	0.334181	USP45
6	99883694	T	15	C	39	AF=0.667	0/0/0/1	3	0.00149626	0.47081	USP45
6	99969441	A	3	G	12	AF=0.667	0/0/0/1	3	0.0351562	0.412257	TSTD3
6	99980905	C	6	T	17	AF=0.667	0/0/0/1	3	0.0346897	0.516661	TSTD3
6	99980962	G	17	A	6	AF=0.333	0/0/0/1	3	0.0346897	0.516661	TSTD3
6	100964147	G	34	C	99	AF=0.667	0/0/0/1	3	1.48773e-08	0.0654109	ASCC3
6	101166095	G	13	A	45	AF=0.667	0/0/0/1	3	3.01159e-05	0.0938838	ASCC3
6	101296389	G	21	A	7	AF=0.333	0/0/0/1	3	0.012541	0.42593	ASCC3
6	101329173	A	81	C	35	AF=0.333	0/0/0/1	3	2.33224e-05	0.554544	ASCC3
6	105528088	T	67	A	149	AF=0.667	0/0/0/1	3	2.44375e-08	0.516109	LIN28B
6	105850846	C	171	A	98	AF=0.333	0/0/0/1	3	1.00808e-05	0.272273	PREP
6	106734089	A	1	G	10	AF=0.667	0/0/0/1	3	0.0117188	0.113886	ATG5
6	107113953	C	141	G	250	AF=0.667	0/0/0/1	3	3.87802e-08	0.259803	QRSL1
6	107349913	G	37	A	74	AF=0.667	0/0/0/1	3	0.000570118	1	C6orf203
6	107362576	A	38	G	10	AF=0.333	0/0/0/1	3	6.16964e-05	0.0677954	C6orf203
6	107362824	G	43	C	70	AF=0.667	0/0/0/1	3	0.0140875	0.318061	C6orf203
6	109493411	C	2	G	13	AF=0.667	0/0/0/1	3	0.00738525	0.167521	None
6	110423498	T	7	C	20	AF=0.667	0/0/0/1	3	0.0191573	0.541228	WASF1
6	110472068	G	2	A	10	AF=0.667	0/0/0/1	3	0.0385742	0.358815	WASF1
6	111588188	C	38	T	69	AF=0.667	0/0/0/1	3	0.00352927	0.609855	KIAA1919
6	111598654	C	18	T	55	AF=0.667	0/0/0/1	3	1.69136e-05	0.136025	None
6	111695268	C	57	T	27	AF=0.333	0/0/0/1	3	0.00140449	0.907985	REV3L
6	111897852	A	4	G	17	AF=0.667	0/0/0/1	3	0.00719738	0.245886	TRAF3IP2, TRAF3IP2-AS1
6	112399750	C	10	T	32	AF=0.667	0/0/0/1	3	0.000940674	0.251283	TUBE1
6	116968213	T	16	C	37	AF=0.667	0/0/0/1	3	0.00548634	0.770857	ZUFSP
6	117881605	A	47	T	123	AF=0.667	0/0/0/1	3	4.9218e-09	0.12261	DCBLD1, GOPC
6	117884738	C	4	A	19	AF=0.667	0/0/0/1	3	0.00259948	0.123957	DCBLD1, GOPC
6	117923599	T	88	C	42	AF=0.333	0/0/0/1	3	6.73841e-05	0.852766	GOPC
6	119219938	C	2	G	14	AF=0.667	0/0/0/1	3	0.00418091	0.109353	ASF1A, MCM9
6	119232497	T	15	C	36	AF=0.667	0/0/0/1	3	0.00460131	0.656428	MCM9
6	119500208	C	188	A	110	AF=0.333	0/0/0/1	3	7.30342e-06	0.19676	MAN1A1
6	119504610	A	25	G	7	AF=0.333	0/0/0/1	3	0.0021024	0.193161	MAN1A1
6	119672583	T	6	C	25	AF=0.667	0/0/0/1	3	0.00087791	0.126647	None
6	119676177	G	26	T	8	AF=0.333	0/0/0/1	3	0.00293506	0.2766	None
6	122765905	T	309	C	143	AF=0.333	0/0/0/1	3	4.15805e-15	0.484818	SERINC1
6	122765948	A	274	G	137	AF=0.333	0/0/0/1	3	1.28124e-11	1	SERINC1
6	126210964	C	12	T	31	AF=0.667	0/0/0/1	3	0.00540157	0.519916	NCOA7
6	126298899	C	64	G	22	AF=0.333	0/0/0/1	3	6.54423e-06	0.137939	HINT3
6	127606588	T	21	C	6	AF=0.333	0/0/0/1	3	0.00592461	0.307037	RNF146
6	127610021	G	63	A	24	AF=0.333	0/0/0/1	3	3.47997e-05	0.305934	ECHDC1
6	127664661	G	143	A	64	AF=0.333	0/0/0/1	3	4.09352e-08	0.507123	ECHDC1
6	130374102	C	91	A	32	AF=0.333	0/0/0/1	3	9.73884e-08	0.103367	L3MBTL3
6	131958485	A	69	C	46	AF=0.333	0/0/0/1	3	0.0397505	0.137757	ENPP3
6	132776734	A	3	G	15	AF=0.667	0/0/0/1	3	0.00753784	0.209209	None
6	132779502	T	31	C	89	AF=0.667	0/0/0/1	3	1.11877e-07	0.0991186	STX7
6	132781339	C	10	T	28	AF=0.667	0/0/0/1	3	0.00509764	0.395478	STX7
6	133111999	G	5	A	15	AF=0.667	0/0/0/1	3	0.0413895	0.48797	SLC18B1
6	133138249	T	82	C	54	AF=0.333	0/0/0/1	3	0.02026	0.12189	RPS12, SNORA33
6	133139610	C	13	G	3	AF=0.333	0/0/0/1	3	0.0212708	0.292529	None
6	133139720	T	26	A	11	AF=0.333	0/0/0/1	3	0.0200739	0.729287	None
6	135525737	A	101	G	64	AF=0.333	0/0/0/1	3	0.00491635	0.137586	MYB
6	135526768	C	78	T	41	AF=0.333	0/0/0/1	3	0.000888137	0.771435	MYB
6	135649013	C	20	T	6	AF=0.333	0/0/0/1	3	0.00935531	0.30574	AHI1
6	143755035	A	543	C	205	AF=0.25	0/0/0/1	4	4.18678e-36	0.128663	ADAT2
6	147709088	G	61	A	31	AF=0.25	0/0/0/1	4	0.0023146	0.069834	BC043173, STXBP5
6	167380493	G	24	A	8	AF=0.25	0/0/0/1	4	0.00700037	1	None
6	167380501	A	24	G	8	AF=0.25	0/0/0/1	4	0.00700037	1	None
6	167431910	G	83	A	25	AF=0.25	0/0/0/1	4	1.88293e-08	0.739159	CCR6, FGFR1OP
6	167431949	G	74	A	22	AF=0.25	0/0/0/1	4	9.43986e-08	0.723995	CCR6, FGFR1OP
6	168348401	T	2	A	13	AF=0.75	0/0/0/1	4	0.00738525	0.384456	MLLT4
7	147984	G	3	A	15	AF=0.667	0/0/0/1/1	3	0.00753784	0.209209	None
7	589354	C	83	T	41	AF=0.333	0/0/0/1/1	3	0.000203789	1	PRKAR1B
7	645744	G	32	C	16	AF=0.333	0/0/0/1/1	3	0.0293049	1	PRKAR1B
7	889858	C	11	T	32	AF=0.667	0/0/0/1/1	3	0.00191396	0.333459	SUN1
7	1005436	A	1	G	9	AF=0.667	0/0/0/1/1	3	0.0214844	0.180663	ADAP1, COX19
7	1007383	A	13	G	38	AF=0.667	0/0/0/1/1	3	0.000621043	0.298203	ADAP1, COX19
7	1065947	C	14	A	32	AF=0.667	0/0/0/1/1	3	0.0113516	0.755948	C7orf50
7	1065948	A	13	G	32	AF=0.667	0/0/0/1/1	3	0.00660882	0.63585	C7orf50
7	1201843	G	2	A	10	AF=0.667	0/0/0/1/1	3	0.0385742	0.358815	AK090593
7	1203904	T	7	A	29	AF=0.667	0/0/0/1/1	3	0.000312551	0.109668	AK090593
7	1204225	C	12	T	31	AF=0.667	0/0/0/1/1	3	0.00540157	0.519916	AK090593
7	1204226	A	11	G	31	AF=0.667	0/0/0/1/1	3	0.00288725	0.413415	AK090593
7	1204354	T	5	A	16	AF=0.667	0/0/0/1/1	3	0.0266037	0.488508	AK090593
7	1204368	G	5	A	25	AF=0.667	0/0/0/1/1	3	0.000324914	0.0543561	AK090593
7	1204442	C	27	T	46	AF=0.667	0/0/0/1/1	3	0.0344159	0.535067	AK090593
7	1205210	A	9	T	22	AF=0.667	0/0/0/1/1	3	0.0294494	0.705743	AK090593
7	1205578	C	1	A	10	AF=0.667	0/0/0/1/1	3	0.0117188	0.113886	AK090593
7	1476659	G	42	C	14	AF=0.333	0/0/0/1/1	3	0.000234446	0.204496	MICALL2
7	1476669	G	14	A	43	AF=0.667	0/0/0/1/1	3	0.000153889	0.205337	MICALL2
7	1476796	C	51	T	27	AF=0.333	0/0/0/1/1	3	0.00877171	0.810734	MICALL2
7	1476938	A	39	G	19	AF=0.333	0/0/0/1/1	3	0.0119281	1	MICALL2
7	1480280	C	494	T	212	AF=0.333	0/0/0/1/1	3	7.97922e-27	0.0662774	MICALL2
7	1480286	G	456	A	207	AF=0.333	0/0/0/1/1	3	1.86951e-22	0.266047	MICALL2
7	1481344	G	98	A	41	AF=0.333	0/0/0/1/1	3	1.47062e-06	0.368958	MICALL2
7	1482101	C	387	G	177	AF=0.333	0/0/0/1/1	3	5.32976e-19	0.348324	MICALL2
7	1886333	A	16	G	4	AF=0.333	0/0/0/1/1	3	0.0118179	0.243595	AK127048, MAD1L1
7	1894116	T	30	C	11	AF=0.333	0/0/0/1/1	3	0.004324	0.413045	MAD1L1
7	1894736	C	111	A	71	AF=0.333	0/0/0/1/1	3	0.00372245	0.115421	MAD1L1
7	1976457	C	107	T	37	AF=0.333	0/0/0/1/1	3	4.44435e-09	0.0628689	MAD1L1
7	2293509	G	13	A	42	AF=0.667	0/0/0/1/1	3	0.000113611	0.152459	SNX8
7	2579691	C	83	G	35	AF=0.333	0/0/0/1/1	3	1.16399e-05	0.43557	BRAT1
7	2583328	C	94	T	209	AF=0.667	0/0/0/1/1	3	3.38563e-11	0.428332	BRAT1
7	2946461	T	13	C	39	AF=0.667	0/0/0/1/1	3	0.000409541	0.240007	CARD11
7	4806222	C	45	T	80	AF=0.667	0/0/0/1/1	3	0.00222649	0.508312	FOXK1
7	4809003	A	52	G	21	AF=0.333	0/0/0/1/1	3	0.00037134	0.457702	FOXK1
7	4809336	T	65	C	27	AF=0.333	0/0/0/1/1	3	9.26404e-05	0.441488	FOXK1
7	4810801	A	89	G	31	AF=0.333	0/0/0/1/1	3	1.11877e-07	0.0991186	FOXK1
7	4869297	G	17	A	5	AF=0.333	0/0/0/1/1	3	0.0169005	0.369388	RADIL
7	5254218	G	397	A	220	AF=0.333	0/0/0/1/1	3	9.74777e-13	0.215653	WIPI2
7	5272177	C	41	T	18	AF=0.333	0/0/0/1/1	3	0.00379371	0.782499	WIPI2
7	5272927	C	3	T	17	AF=0.667	0/0/0/1/1	3	0.00257683	0.0981777	WIPI2
7	5410425	G	60	C	36	AF=0.333	0/0/0/1/1	3	0.0184334	0.387529	TNRC18
7	5434135	A	24	G	8	AF=0.333	0/0/0/1/1	3	0.00700037	0.355135	TNRC18
7	5565434	A	4	G	19	AF=0.667	0/0/0/1/1	3	0.00259948	0.123957	None
7	5633505	C	11	T	26	AF=0.667	0/0/0/1/1	3	0.0200739	0.729287	FSCN1
7	6062229	T	76	C	47	AF=0.333	0/0/0/1/1	3	0.0112758	0.251855	AIMP2, EIF2AK1
7	6069349	C	5	G	20	AF=0.667	0/0/0/1/1	3	0.00407732	0.203802	EIF2AK1
7	6370144	G	31	A	13	AF=0.333	0/0/0/1/1	3	0.00955988	0.749257	FAM220A
7	6370305	C	44	G	15	AF=0.333	0/0/0/1/1	3	0.000203722	0.216407	FAM220A
7	6434691	T	26	A	10	AF=0.333	0/0/0/1/1	3	0.011331	0.596626	RAC1
7	6441799	G	44	C	16	AF=0.333	0/0/0/1/1	3	0.000394043	0.337706	RAC1
7	6449272	A	155	G	83	AF=0.333	0/0/0/1/1	3	3.55453e-06	0.630304	DAGLB
7	6506375	T	4	C	16	AF=0.667	0/0/0/1/1	3	0.0118179	0.243595	DAGLB, KDELR2
7	6513779	T	20	C	43	AF=0.667	0/0/0/1/1	3	0.0051524	0.893872	DAGLB, KDELR2
7	6516437	T	3	G	18	AF=0.667	0/0/0/1/1	3	0.00148964	0.067485	DAGLB, KDELR2
7	6694718	A	185	G	84	AF=0.333	0/0/0/1/1	3	6.86773e-10	0.517746	None
7	7286193	A	7	G	19	AF=0.667	0/0/0/1/1	3	0.0289593	0.541009	C1GALT1
7	8385264	T	49	A	22	AF=0.333	0/0/0/1/1	3	0.0018204	0.801289	AX746880
7	10534052	T	17	A	4	AF=0.333	0/0/0/1/1	3	0.00719738	0.245886	None
7	11022230	A	128	G	62	AF=0.333	0/0/0/1/1	3	1.92164e-06	0.877911	PHF14
7	11022564	G	283	A	165	AF=0.333	0/0/0/1/1	3	2.71486e-08	0.120118	PHF14
7	11144030	G	3	T	14	AF=0.667	0/0/0/1/1	3	0.0127258	0.20607	PHF14
7	12412588	A	30	G	73	AF=0.667	0/0/0/1/1	3	2.71764e-05	0.404016	VWDE
7	12433390	G	96	A	241	AF=0.667	0/0/0/1/1	3	1.5851e-15	0.0643112	VWDE
7	13935307	C	24	T	10	AF=0.333	0/0/0/1/1	3	0.0243065	0.718251	ETV1
7	16306703	T	4	C	14	AF=0.667	0/0/0/1/1	3	0.0308838	0.454315	ISPD, LOC100506025
7	16313122	G	4	T	21	AF=0.667	0/0/0/1/1	3	0.000910521	0.0877184	ISPD
7	16323521	T	4	C	17	AF=0.667	0/0/0/1/1	3	0.00719738	0.245886	ISPD
7	16325280	C	9	G	34	AF=0.667	0/0/0/1/1	3	0.000170155	0.104851	ISPD
7	16326301	G	7	C	21	AF=0.667	0/0/0/1/1	3	0.012541	0.42593	ISPD
7	16816000	T	243	C	104	AF=0.333	0/0/0/1/1	3	5.91079e-14	0.210085	TSPAN13
7	22610713	G	15	A	5	AF=0.333	0/0/0/1/1	3	0.0413895	0.48797	LOC100506178
7	23164701	C	54	T	87	AF=0.667	0/0/0/1/1	3	0.00682955	0.21168	KLHL7
7	23221870	T	19	C	39	AF=0.667	0/0/0/1/1	3	0.0119281	1	NUPL2
7	23571558	C	107	T	208	AF=0.667	0/0/0/1/1	3	1.33168e-08	0.811116	TRA2A
7	24837520	C	22	A	7	AF=0.333	0/0/0/1/1	3	0.00813006	0.331762	OSBPL3
7	24903139	C	85	T	51	AF=0.333	0/0/0/1/1	3	0.00448125	0.317043	OSBPL3
7	25159211	A	8	T	25	AF=0.667	0/0/0/1/1	3	0.00455138	0.35591	CYCS
7	25161062	T	47	C	25	AF=0.333	0/0/0/1/1	3	0.0127746	0.80322	CYCS
7	25161133	G	30	A	91	AF=0.667	0/0/0/1/1	3	2.49573e-08	0.0532729	CYCS
7	26233790	A	83	G	56	AF=0.333	0/0/0/1/1	3	0.0270735	0.0872146	HNRNPA2B1
7	26234302	G	76	A	41	AF=0.333	0/0/0/1/1	3	0.0015572	0.69539	HNRNPA2B1
7	26237692	G	55	A	21	AF=0.333	0/0/0/1/1	3	0.000120629	0.331351	HNRNPA2B1
7	27565161	A	61	G	139	AF=0.667	0/0/0/1/1	3	3.51816e-08	0.453129	HIBADH
7	30411126	A	3	G	14	AF=0.667	0/0/0/1/1	3	0.0127258	0.20607	DKFZP586I1420
7	32623796	C	74	T	31	AF=0.333	0/0/0/1/1	3	3.27554e-05	0.468873	AVL9, DPY19L1P1
7	32625099	C	59	T	123	AF=0.667	0/0/0/1/1	3	2.40037e-06	0.875055	AVL9, DPY19L1P1
7	32625825	G	81	A	46	AF=0.333	0/0/0/1/1	3	0.00241755	0.510073	AVL9, DPY19L1P1
7	32626781	C	98	T	58	AF=0.333	0/0/0/1/1	3	0.00170437	0.308695	AVL9, DPY19L1P1
7	32793800	T	46	C	25	AF=0.333	0/0/0/1/1	3	0.0169947	0.707806	AK057321, AVL9
7	38269668	G	243	A	119	AF=0.333	0/0/0/1/1	3	6.65946e-11	0.91122	STARD3NL
7	38417556	A	72	C	112	AF=0.667	0/0/0/1/1	3	0.00391746	0.10039	LOC100506776
7	38764676	C	15	T	32	AF=0.667	0/0/0/1/1	3	0.0186238	1	VPS41
7	38786506	G	18	A	6	AF=0.333	0/0/0/1/1	3	0.0226558	0.517006	VPS41
7	38786618	T	31	G	14	AF=0.333	0/0/0/1/1	3	0.0160944	0.87466	VPS41
7	38792534	C	14	T	4	AF=0.333	0/0/0/1/1	3	0.0308838	0.454315	VPS41
7	43658804	T	12	G	28	AF=0.667	0/0/0/1/1	3	0.016589	0.739121	COA1, STK17A
7	43658807	G	12	A	29	AF=0.667	0/0/0/1/1	3	0.0115078	0.740576	COA1, STK17A
7	43664280	A	105	G	61	AF=0.333	0/0/0/1/1	3	0.000794063	0.365117	COA1, STK17A
7	43671232	C	26	T	8	AF=0.333	0/0/0/1/1	3	0.00293506	0.2766	COA1
7	43843423	G	357	A	170	AF=0.333	0/0/0/1/1	3	2.63221e-16	0.644029	BLVRA
7	44424211	T	176	C	79	AF=0.333	0/0/0/1/1	3	1.1678e-09	0.465076	NUDCD3
7	44424253	C	182	T	114	AF=0.333	0/0/0/1/1	3	9.22499e-05	0.0640957	NUDCD3
7	44444122	G	113	A	58	AF=0.333	0/0/0/1/1	3	3.14075e-05	0.871258	NUDCD3
7	44611227	G	494	A	256	AF=0.333	0/0/0/1/1	3	2.59766e-18	0.64204	DDX56
7	44790988	G	28	A	12	AF=0.333	0/0/0/1/1	3	0.016589	0.739121	ZMIZ2
7	45023302	T	31	C	65	AF=0.667	0/0/0/1/1	3	0.000674719	0.913891	SNHG15
7	45024413	G	46	A	129	AF=0.667	0/0/0/1/1	3	2.63314e-10	0.0539605	SNHG15
7	45024876	A	100	G	179	AF=0.667	0/0/0/1/1	3	2.60656e-06	0.374142	SNHG15
7	45025542	C	34	T	97	AF=0.667	0/0/0/1/1	3	3.3215e-08	0.0783739	SNHG15
7	47995621	A	28	G	12	AF=0.333	0/0/0/1/1	3	0.016589	0.739121	None
7	47995628	G	28	A	12	AF=0.333	0/0/0/1/1	3	0.016589	0.739121	None
7	48001054	C	63	T	27	AF=0.333	0/0/0/1/1	3	0.000187756	0.576428	None
7	50742180	C	124	T	217	AF=0.667	0/0/0/1/1	3	5.39025e-07	0.228171	GRB10
7	53879453	C	53	A	17	AF=0.333	0/0/0/1/1	3	1.91997e-05	0.127825	FLJ45974
7	55433880	G	24	C	58	AF=0.667	0/0/0/1/1	3	0.000221964	0.483415	LANCL2
7	55434547	G	11	A	30	AF=0.667	0/0/0/1/1	3	0.004324	0.413045	LANCL2
7	55459563	A	71	G	26	AF=0.333	0/0/0/1/1	3	5.45855e-06	0.196411	LANCL2
7	56126360	T	3049	C	1438	AF=0.333	0/0/0/1/1	3	1.72005e-130	0.0760818	CCT6A, PSPH
7	56142519	A	57	G	18	AF=0.333	0/0/0/1/1	3	7.24416e-06	0.110385	PSPH, SUMF2
7	73932360	G	17	A	5	AF=0.25	0/0/0/1/1	4	0.0169005	1	GTF2IRD1
7	92028845	C	69	A	28	AF=0.25	0/0/0/1/1	4	3.80379e-05	0.411398	ANKIB1
7	102107833	G	524	A	172	AF=0.25	0/0/0/1/1	4	3.27986e-42	0.895553	LRWD1
7	105148683	A	272	G	167	AF=0.4	0/0/0/1/1	5	6.15191e-07	0.408134	PUS7
7	105502606	C	20	T	6	AF=0.4	0/0/0/1/1	5	0.00935531	0.107639	ATXN7L1
7	107383744	C	71	G	135	AF=0.6	0/0/0/1/1	5	9.73376e-06	0.117521	None
7	107384278	C	1	T	10	AF=0.6	0/0/0/1/1	5	0.0117188	0.0595146	CBLL1
7	107384309	C	1	G	9	AF=0.6	0/0/0/1/1	5	0.0214844	0.058652	CBLL1
7	107544317	A	26	G	10	AF=0.4	0/0/0/1/1	5	0.011331	0.173007	DLD
7	107561943	A	33	T	12	AF=0.4	0/0/0/1/1	5	0.0024589	0.0696522	None
7	107562090	C	50	G	30	AF=0.4	0/0/0/1/1	5	0.0329926	0.732364	None
7	107574306	C	2	T	11	AF=0.6	0/0/0/1/1	5	0.0224609	0.0899867	LAMB1
7	111057345	T	10	C	24	AF=0.6	0/0/0/1/1	5	0.0243065	0.225483	IMMP2L
7	111069946	A	2	C	11	AF=0.6	0/0/0/1/1	5	0.0224609	0.0899867	IMMP2L
7	111174945	A	13	C	58	AF=0.8	0/0/0/1/1	5	6.26943e-08	0.881951	IMMP2L
7	111195204	A	18	G	5	AF=0.4	0/0/0/1/1	5	0.010622	0.0888907	IMMP2L
7	111950766	A	3	C	14	AF=0.6	0/0/0/1/1	5	0.0127258	0.0812357	ZNF277
7	112102355	T	367	G	484	AF=0.6	0/0/0/1/1	5	6.82701e-05	0.0637405	IFRD1
7	112112279	G	503	A	736	AF=0.6	0/0/0/1/1	5	3.84133e-11	0.684804	IFRD1
7	113125817	C	10	T	28	AF=0.6	0/0/0/1/1	5	0.00509764	0.0981056	None
7	117825297	C	55	G	26	AF=0.4	0/0/0/1/1	5	0.00168864	0.173312	NAA38
7	117825549	T	126	G	34	AF=0.2	0/0/0/1/1	5	1.2521e-13	0.692673	NAA38
7	117825681	A	125	G	75	AF=0.4	0/0/0/1/1	5	0.000499426	0.516107	NAA38
7	117827994	A	12	C	3	AF=0.4	0/0/0/1/1	5	0.0351562	0.185549	NAA38
7	117828003	C	12	T	3	AF=0.4	0/0/0/1/1	5	0.0351562	0.185549	NAA38
7	117834049	A	59	G	34	AF=0.4	0/0/0/1/1	5	0.0124006	0.526971	NAA38
7	120636339	A	6	G	18	AF=0.6	0/0/0/1/1	5	0.0226558	0.149453	CPED1
7	120720015	C	221	A	308	AF=0.6	0/0/0/1/1	5	0.000179069	0.424451	CPED1
7	120720016	T	221	G	306	AF=0.6	0/0/0/1/1	5	0.000246054	0.374005	CPED1
7	123175904	G	6	A	18	AF=0.6	0/0/0/1/1	5	0.0226558	0.149453	None
7	123323428	T	35	A	13	AF=0.4	0/0/0/1/1	5	0.00208811	0.0770073	WASL
7	124483272	A	18	T	6	AF=0.4	0/0/0/1/1	5	0.0226558	0.149453	POT1
7	127006766	C	26	T	10	AF=0.4	0/0/0/1/1	5	0.011331	0.173007	None
7	127946108	C	36	T	17	AF=0.4	0/0/0/1/1	5	0.0126603	0.264144	MGC27345
7	127950414	T	50	C	24	AF=0.4	0/0/0/1/1	5	0.00337223	0.193878	None
7	127980047	A	14	G	33	AF=0.6	0/0/0/1/1	5	0.00794273	0.180651	RBM28
7	127980173	T	48	G	26	AF=0.4	0/0/0/1/1	5	0.01408	0.409321	RBM28
7	128047412	C	14	A	30	AF=0.6	0/0/0/1/1	5	0.0226288	0.286012	IMPDH1
7	128098254	T	109	C	75	AF=0.4	0/0/0/1/1	5	0.0147577	0.880428	HILPDA
7	128127355	T	4	A	15	AF=0.6	0/0/0/1/1	5	0.0192108	0.104842	METTL2B
7	128142033	T	142	C	87	AF=0.4	0/0/0/1/1	5	0.00033841	0.544788	METTL2B
7	128413247	C	166	T	107	AF=0.4	0/0/0/1/1	5	0.00042725	0.80512	CALU, OPN1SW
7	128448311	G	3	A	12	AF=0.6	0/0/0/1/1	5	0.0351562	0.185549	CCDC136
7	128600342	T	1	C	9	AF=0.6	0/0/0/1/1	5	0.0214844	0.058652	TNPO3
7	129096989	A	65	T	97	AF=0.6	0/0/0/1/1	5	0.0146124	1	STRIP2
7	129104269	T	18	A	7	AF=0.4	0/0/0/1/1	5	0.0432853	0.30732	STRIP2
7	129123545	C	24	T	7	AF=0.4	0/0/0/1/1	5	0.00332689	0.0649763	STRIP2
7	129124150	G	4	A	17	AF=0.6	0/0/0/1/1	5	0.00719738	0.0721835	STRIP2
7	129125750	G	109	A	153	AF=0.6	0/0/0/1/1	5	0.00777436	0.614144	STRIP2
7	129251289	C	42	T	20	AF=0.4	0/0/0/1/1	5	0.00714873	0.244071	None
7	129330353	C	170	T	106	AF=0.4	0/0/0/1/1	5	0.000140226	0.62325	NRF1
7	129472056	C	32	T	11	AF=0.4	0/0/0/1/1	5	0.00191396	0.0614244	AL832212, UBE2H
7	129664312	T	350	C	196	AF=0.4	0/0/0/1/1	5	4.37235e-11	0.0545199	ZC3HC1
7	129774080	T	171	C	302	AF=0.6	0/0/0/1/1	5	1.79868e-09	0.0911528	KLHDC10
7	129813738	T	222	C	351	AF=0.6	0/0/0/1/1	5	7.91164e-08	0.550807	TMEM209
7	130146607	C	207	T	162	AF=0.4	0/0/0/1/1	5	0.0218621	0.13672	COPG2
7	133580447	G	135	A	85	AF=0.4	0/0/0/1/1	5	0.00091247	0.730901	EXOC4
7	134845313	T	47	G	23	AF=0.4	0/0/0/1/1	5	0.00558267	0.272084	C7orf49, TMEM140
7	134847888	C	48	T	20	AF=0.4	0/0/0/1/1	5	0.000914391	0.0831412	C7orf49, TMEM140
7	134850725	G	170	A	220	AF=0.6	0/0/0/1/1	5	0.012993	0.14824	C7orf49, TMEM140
7	135169414	C	2	T	10	AF=0.6	0/0/0/1/1	5	0.0385742	0.140753	CNOT4
7	135377466	T	13	C	3	AF=0.4	0/0/0/1/1	5	0.0212708	0.123466	C7orf73, SLC13A4
7	135614740	T	438	C	303	AF=0.4	0/0/0/1/1	5	7.98929e-07	0.626079	LUZP6
7	135938979	C	14	T	3	AF=0.4	0/0/0/1/1	5	0.0127258	0.0812357	None
7	136122820	G	49	T	73	AF=0.6	0/0/0/1/1	5	0.0368775	1	None
7	138730608	A	36	G	17	AF=0.4	0/0/0/1/1	5	0.0126603	0.264144	ZC3HAV1
7	138990811	C	27	T	60	AF=0.6	0/0/0/1/1	5	0.000524355	0.100459	UBN2
7	139043808	A	8	C	22	AF=0.6	0/0/0/1/1	5	0.0161248	0.191068	C7orf55-LUC7L2, LUC7L2
7	139044891	G	325	T	538	AF=0.6	0/0/0/1/1	5	4.0777e-13	0.16469	C7orf55-LUC7L2, LUC7L2
7	139051918	A	1	G	9	AF=0.6	0/0/0/1/1	5	0.0214844	0.058652	C7orf55-LUC7L2, LUC7L2
7	139054919	G	17	A	34	AF=0.6	0/0/0/1/1	5	0.0240929	0.391856	C7orf55-LUC7L2, LUC7L2
7	139098024	G	2	A	10	AF=0.6	0/0/0/1/1	5	0.0385742	0.140753	C7orf55-LUC7L2, LUC7L2
7	139107660	A	368	G	594	AF=0.6	0/0/0/1/1	5	3.16017e-13	0.277577	C7orf55-LUC7L2, LOC100129148, LUC7L2
7	139107739	T	374	A	630	AF=0.6	0/0/0/1/1	5	5.90091e-16	0.0765017	C7orf55-LUC7L2, LOC100129148, LUC7L2
7	139723742	C	19	T	39	AF=0.6	0/0/0/1/1	5	0.0119281	0.285714	PARP12
7	139785024	C	35	A	60	AF=0.6	0/0/0/1/1	5	0.0133787	0.600828	JHDM1D
7	139787189	G	33	A	70	AF=0.6	0/0/0/1/1	5	0.000340998	0.107792	JHDM1D
7	142498833	A	46	T	84	AF=0.6	0/0/0/1/1	5	0.00109256	0.324781	BV03S1J2.2, TCRVB
7	142498837	C	41	T	85	AF=0.6	0/0/0/1/1	5	0.000110211	0.101341	BV03S1J2.2, TCRVB
7	142498897	A	59	G	85	AF=0.6	0/0/0/1/1	5	0.0368523	0.864992	BV03S1J2.2, TCRVB
7	142647428	C	28	T	11	AF=0.4	0/0/0/1/1	5	0.0094753	0.144098	KEL
7	142649292	A	14	G	4	AF=0.4	0/0/0/1/1	5	0.0308838	0.151816	KEL
7	142649564	A	22	G	7	AF=0.4	0/0/0/1/1	5	0.00813006	0.0898717	KEL
7	145482519	A	7	G	19	AF=0.6	0/0/0/1/1	5	0.0289593	0.229745	None
7	145554977	T	11	C	28	AF=0.6	0/0/0/1/1	5	0.0094753	0.144098	None
7	145611531	C	1	T	10	AF=0.6	0/0/0/1/1	5	0.0117188	0.0595146	None
7	145613273	T	3	C	12	AF=0.6	0/0/0/1/1	5	0.0351562	0.185549	None
7	145618295	G	2	A	10	AF=0.6	0/0/0/1/1	5	0.0385742	0.140753	None
7	145683498	T	2	G	12	AF=0.6	0/0/0/1/1	5	0.0129395	0.0573011	None
7	145777487	G	17	C	6	AF=0.4	0/0/0/1/1	5	0.0346897	0.205303	None
7	148510153	A	2	G	27	AF=0.8	0/0/0/1/1	5	1.62423e-06	0.101296	EZH2
7	149301904	T	9	C	26	AF=0.6	0/0/0/1/1	5	0.00598812	0.119059	ZNF767
7	149426729	C	4	T	17	AF=0.6	0/0/0/1/1	5	0.00719738	0.0721835	KRBA1
7	149462337	G	8	A	26	AF=0.6	0/0/0/1/1	5	0.00293506	0.0545261	ZNF467
7	149462523	C	18	G	34	AF=0.6	0/0/0/1/1	5	0.0364834	0.480806	ZNF467
7	150067445	C	198	A	150	AF=0.4	0/0/0/1/1	5	0.0116454	0.250584	REPIN1
7	150092684	C	23	T	8	AF=0.4	0/0/0/1/1	5	0.0106738	0.141506	ZNF775
7	150094853	G	33	A	15	AF=0.4	0/0/0/1/1	5	0.0132833	0.240694	ZNF775
7	150652419	T	12	C	35	AF=0.6	0/0/0/1/1	5	0.00108854	0.051985	KCNH2
7	150708850	G	8	A	23	AF=0.6	0/0/0/1/1	5	0.0106738	0.141506	NOS3
7	150761314	G	792	A	587	AF=0.4	0/0/0/1/1	5	3.72853e-08	0.0543306	SLC4A2
7	150763655	T	374	A	261	AF=0.4	0/0/0/1/1	5	8.364e-06	0.570933	SLC4A2
7	150766799	A	29	G	15	AF=0.4	0/0/0/1/1	5	0.0487668	0.446875	SLC4A2
7	150773807	A	276	T	188	AF=0.4	0/0/0/1/1	5	5.11904e-05	0.849703	FASTK
7	150784407	T	21	C	6	AF=0.4	0/0/0/1/1	5	0.00592461	0.0757896	AGAP3
7	150909049	A	35	G	12	AF=0.4	0/0/0/1/1	5	0.00108854	0.051985	ABCF2
7	151074296	A	82	G	131	AF=0.6	0/0/0/1/1	5	0.000960758	0.675328	NUB1
7	151074663	C	139	T	78	AF=0.4	0/0/0/1/1	5	4.16465e-05	0.239048	NUB1
7	152110011	T	4	C	19	AF=0.8	0/0/0/1/1	5	0.00259948	1	KMT2C
7	152337562	A	16	G	5	AF=0.4	0/0/0/1/1	5	0.0266037	0.180664	None
7	152339108	C	24	G	11	AF=0.4	0/0/0/1/1	5	0.0409596	0.388658	None
7	152341917	T	154	C	100	AF=0.4	0/0/0/1/1	5	0.000847899	0.847995	None
7	155088118	T	50	C	84	AF=0.6	0/0/0/1/1	5	0.00418753	0.53873	None
7	155092718	C	19	T	7	AF=0.4	0/0/0/1/1	5	0.0289593	0.229745	INSIG1
7	155096933	C	33	G	67	AF=0.6	0/0/0/1/1	5	0.00087372	0.184234	INSIG1
7	155099507	A	51	T	21	AF=0.4	0/0/0/1/1	5	0.000534964	0.0706713	INSIG1
7	155569983	G	86	A	53	AF=0.4	0/0/0/1/1	5	0.00643481	0.666398	RBM33
7	156434675	A	7	G	21	AF=0.6	0/0/0/1/1	5	0.012541	0.123959	RNF32
7	156455851	A	15	C	4	AF=0.4	0/0/0/1/1	5	0.0192108	0.104842	RNF32
7	156469096	C	100	T	49	AF=0.4	0/0/0/1/1	5	3.56712e-05	0.0793839	RNF32
7	156469133	C	114	G	60	AF=0.4	0/0/0/1/1	5	5.16385e-05	0.142149	RNF32
7	156469179	C	146	T	86	AF=0.4	0/0/0/1/1	5	9.88104e-05	0.384037	RNF32
7	156475447	G	147	A	186	AF=0.6	0/0/0/1/1	5	0.0371481	0.130947	LMBR1
7	156803323	T	13	C	28	AF=0.6	0/0/0/1/1	5	0.0275332	0.339531	MNX1
7	156934197	A	0	G	10	AF=0.8	0/0/0/1/1	5	0.00195312	0.228248	UBE3C
7	157027108	G	16	A	5	AF=0.4	0/0/0/1/1	5	0.0266037	0.180664	UBE3C
7	157163206	T	14	C	30	AF=0.6	0/0/0/1/1	5	0.0226288	0.286012	DNAJB6
7	157209551	C	227	T	127	AF=0.4	0/0/0/1/1	5	1.18484e-07	0.11592	DNAJB6
7	158422859	T	18	A	5	AF=0.4	0/0/0/1/1	5	0.010622	0.0888907	None
7	158524240	C	176	T	113	AF=0.4	0/0/0/1/1	5	0.000252004	0.764494	ESYT2
7	158665326	A	1	G	17	AF=0.8	0/0/0/1/1	5	0.000144958	0.15035	WDR60
7	158724163	C	7	T	21	AF=0.6	0/0/0/1/1	5	0.012541	0.123959	WDR60
7	158734813	C	131	T	78	AF=0.4	0/0/0/1/1	5	0.00030101	0.4385	WDR60
8	162396	A	73	G	24	AF=0.333	1/1/1	3	6.40473e-07	0.0843528	RPL23AP53
8	1710632	T	32	C	17	AF=0.333	1/1/1	3	0.0443842	0.879757	None
8	1710977	A	51	C	21	AF=0.333	1/1/1	3	0.000534964	0.532287	None
8	2522467	C	31	T	14	AF=0.333	1/1/1	3	0.0160944	0.87466	None
8	2527329	C	67	G	30	AF=0.333	1/1/1	3	0.00021891	0.667557	None
8	2527625	G	29	A	15	AF=0.333	1/1/1	3	0.0487668	0.874534	None
8	2572792	G	24	A	5	AF=0.333	1/1/1	3	0.000546113	0.0763424	AK128880
8	2584448	T	24	C	55	AF=0.667	1/1/1	3	0.000639398	0.634304	AK128880
8	2585105	T	111	C	43	AF=0.333	1/1/1	3	4.07683e-08	0.171495	AK128880
8	2670360	G	35	C	8	AF=0.333	1/1/1	3	4.19342e-05	0.0507615	None
8	2670363	G	35	A	9	AF=0.333	1/1/1	3	0.000106045	0.0787101	None
8	2763888	C	1	T	12	AF=0.667	1/1/1	3	0.00341797	0.0731862	None
8	6567644	C	32	T	91	AF=0.667	1/1/1	3	9.73884e-08	0.103367	AGPAT5
8	8092025	G	37	A	94	AF=0.667	1/1/1	3	6.71787e-07	0.229602	FAM86B3P
8	8093592	G	119	T	193	AF=0.667	1/1/1	3	3.31139e-05	0.0716769	FAM86B3P
8	8094726	G	12	A	34	AF=0.667	1/1/1	3	0.00164149	0.349737	FAM86B3P
8	8884503	G	21	C	6	AF=0.333	1/1/1	3	0.00592461	0.307037	ERI1
8	8888948	A	15	G	32	AF=0.667	1/1/1	3	0.0186238	1	ERI1
8	8995387	A	14	G	32	AF=0.667	1/1/1	3	0.0113516	0.755948	PPP1R3B
8	10622812	G	76	A	47	AF=0.333	1/1/1	3	0.0112758	0.251855	SOX7
8	11684403	G	3	A	12	AF=0.667	1/1/1	3	0.0351562	0.412257	FDFT1
8	11696352	T	261	C	499	AF=0.667	1/1/1	3	4.39195e-18	0.538296	FDFT1
8	11700896	A	74	G	25	AF=0.333	1/1/1	3	8.50599e-07	0.109074	CTSB
8	11701096	A	39	C	66	AF=0.667	1/1/1	3	0.0108179	0.408548	CTSB
8	11701198	G	68	A	35	AF=0.333	1/1/1	3	0.00148967	0.916809	CTSB
8	11702313	C	681	G	309	AF=0.333	1/1/1	3	7.71908e-33	0.166923	CTSB
8	11702441	A	960	G	453	AF=0.333	1/1/1	3	3.43645e-42	0.337245	CTSB
8	11702542	T	271	C	615	AF=0.667	1/1/1	3	1.72098e-31	0.0872057	CTSB
8	11710888	G	336	C	731	AF=0.667	1/1/1	3	2.91799e-34	0.217158	CTSB
8	11725513	G	214	A	96	AF=0.333	1/1/1	3	1.73763e-11	0.399405	CTSB
8	12942510	A	38	G	21	AF=0.333	1/1/1	3	0.0363432	0.681478	DLC1
8	12958025	C	30	A	13	AF=0.333	1/1/1	3	0.0137182	0.747955	DLC1
8	15397820	C	179	T	341	AF=0.667	1/1/1	3	1.09826e-12	0.608824	TUSC3
8	15614566	G	4	C	19	AF=0.667	1/1/1	3	0.00259948	0.123957	TUSC3
8	15620098	T	50	C	15	AF=0.333	1/1/1	3	1.5717e-05	0.0874764	TUSC3
8	17125768	T	112	C	43	AF=0.333	1/1/1	3	2.80649e-08	0.148163	VPS37A
8	17142065	C	91	T	43	AF=0.333	1/1/1	3	4.1113e-05	0.85461	VPS37A
8	17152857	T	4	G	20	AF=0.667	1/1/1	3	0.00154388	0.126936	VPS37A
8	17794792	G	90	A	184	AF=0.667	1/1/1	3	1.40421e-08	0.898167	PCM1
8	17817553	G	124	T	299	AF=0.667	1/1/1	3	9.03211e-18	0.0885748	PCM1
8	17820714	A	106	T	247	AF=0.667	1/1/1	3	4.2443e-14	0.214009	PCM1
8	17865696	C	3	T	18	AF=0.667	1/1/1	3	0.00148964	0.067485	PCM1
8	17885406	C	1	G	10	AF=0.667	1/1/1	3	0.0117188	0.113886	PCM1
8	17886026	G	10	A	26	AF=0.667	1/1/1	3	0.011331	0.596626	PCM1
8	17886345	T	4	C	14	AF=0.667	1/1/1	3	0.0308838	0.454315	PCM1
8	19677915	G	370	A	209	AF=0.333	1/1/1	3	2.20268e-11	0.158277	INTS10
8	19679163	C	28	T	7	AF=0.333	1/1/1	3	0.00050826	0.107691	INTS10
8	19680979	C	7	T	24	AF=0.667	1/1/1	3	0.00332689	0.254392	INTS10
8	19689058	A	17	G	5	AF=0.333	1/1/1	3	0.0169005	0.369388	INTS10
8	19704682	G	37	C	16	AF=0.333	1/1/1	3	0.00548634	0.770857	INTS10
8	19830769	C	3	T	14	AF=0.667	1/1/1	3	0.0127258	0.20607	None
8	22104395	A	12	G	25	AF=0.667	1/1/1	3	0.047031	1	POLR3D
8	22107240	C	2	T	10	AF=0.667	1/1/1	3	0.0385742	0.358815	POLR3D
8	22262321	T	60	C	123	AF=0.667	1/1/1	3	3.71422e-06	0.937543	SLC39A14
8	22262418	A	82	G	143	AF=0.667	1/1/1	3	5.7507e-05	0.322449	SLC39A14
8	22268691	C	9	G	32	AF=0.667	1/1/1	3	0.000430857	0.137726	SLC39A14
8	22277446	T	49	C	90	AF=0.667	1/1/1	3	0.000638295	0.652905	SLC39A14
8	22278781	G	56	A	152	AF=0.667	1/1/1	3	1.96795e-11	0.0555616	SLC39A14
8	22279863	A	98	C	164	AF=0.667	1/1/1	3	5.44917e-05	0.168602	SLC39A14
8	22467760	C	15	G	5	AF=0.333	1/1/1	3	0.0413895	0.48797	KIAA1967
8	22471147	G	24	T	11	AF=0.333	1/1/1	3	0.0409596	1	KIAA1967
8	22477807	T	191	C	97	AF=0.333	1/1/1	3	3.24006e-08	0.900556	KIAA1967
8	22481449	A	142	G	73	AF=0.333	1/1/1	3	2.92771e-06	0.828515	BIN3
8	22879734	T	210	C	110	AF=0.333	1/1/1	3	2.42572e-08	0.6784	TNFRSF10B
8	22927696	T	46	C	19	AF=0.333	1/1/1	3	0.00109008	0.514208	LOC286059
8	23282204	C	2	T	13	AF=0.667	1/1/1	3	0.00738525	0.167521	ENTPD4
8	23292136	C	12	T	43	AF=0.667	1/1/1	3	3.30538e-05	0.0852043	ENTPD4
8	23388326	A	15	G	29	AF=0.667	1/1/1	3	0.0487668	0.874534	SLC25A37
8	23423758	G	539	A	1155	AF=0.667	1/1/1	3	1.30911e-51	0.197559	SLC25A37
8	23432314	T	50	C	78	AF=0.667	1/1/1	3	0.0166707	0.188868	FP15737
8	23432332	C	75	T	41	AF=0.333	1/1/1	3	0.00204933	0.62392	FP15737
8	25287397	T	186	C	73	AF=0.333	1/1/1	3	1.51089e-12	0.0864383	KCTD9, PPP2R2A
8	25364331	G	17	A	57	AF=0.667	1/1/1	3	3.39717e-06	0.0642632	CDCA2, PPP2R2A
8	25364960	A	113	G	64	AF=0.333	1/1/1	3	0.00028466	0.425716	CDCA2, PPP2R2A
8	25365278	G	17	A	43	AF=0.667	1/1/1	3	0.00106577	0.493892	CDCA2, PPP2R2A
8	26240646	A	56	G	26	AF=0.333	1/1/1	3	0.00122038	0.81546	BNIP3L
8	27277537	G	52	A	19	AF=0.333	1/1/1	3	0.000112269	0.259756	PTK2B
8	27293865	C	135	T	52	AF=0.333	1/1/1	3	1.08042e-09	0.120704	PTK2B
8	27306551	T	34	A	12	AF=0.333	1/1/1	3	0.00164149	0.349737	PTK2B
8	27308004	G	4	A	19	AF=0.667	1/1/1	3	0.00259948	0.123957	PTK2B
8	27372189	G	31	A	82	AF=0.667	1/1/1	3	1.73e-06	0.195807	EPHX2
8	27394366	C	41	T	98	AF=0.667	1/1/1	3	1.47062e-06	0.368958	EPHX2
8	27667969	C	1082	G	544	AF=0.333	1/1/1	3	3.40311e-41	0.895354	ESCO2, PBK
8	28048026	G	136	A	62	AF=0.333	1/1/1	3	1.54215e-07	0.597883	ELP3
8	28707739	G	246	A	135	AF=0.333	1/1/1	3	1.39033e-08	0.384633	INTS9
8	28917837	G	61	A	88	AF=0.667	1/1/1	3	0.0328218	0.0554709	None
8	29921006	T	143	C	79	AF=0.333	1/1/1	3	2.08224e-05	0.476795	MIR548O2, TMEM66
8	29921288	A	328	C	160	AF=0.333	1/1/1	3	2.24988e-14	0.847691	MIR548O2, TMEM66
8	29940505	C	860	T	380	AF=0.333	1/1/1	3	3.33048e-43	0.0501344	MIR548O2, TMEM66
8	37730368	G	42	A	116	AF=0.667	1/1/1	3	3.28839e-09	0.0764683	RAB11FIP1
8	37730456	G	47	T	98	AF=0.667	1/1/1	3	2.75528e-05	0.860477	RAB11FIP1
8	38130025	G	60	A	34	AF=0.333	1/1/1	3	0.00954781	0.584555	None
8	38260050	C	14	T	35	AF=0.667	1/1/1	3	0.00380165	0.546457	LETM2
8	38695996	T	80	C	41	AF=0.333	1/1/1	3	0.000498562	0.923214	TACC1
8	38706397	G	62	C	20	AF=0.333	1/1/1	3	3.71464e-06	0.100536	TACC1
8	38707452	A	70	T	27	AF=0.333	1/1/1	3	1.4767e-05	0.2821	TACC1
8	41400597	G	58	T	119	AF=0.667	1/1/1	3	5.29491e-06	0.936497	GINS4
8	41400996	A	85	C	130	AF=0.667	1/1/1	3	0.00261053	0.059652	GINS4
8	41401233	T	48	C	90	AF=0.667	1/1/1	3	0.000440585	0.718352	GINS4
8	41401571	T	129	A	73	AF=0.333	1/1/1	3	9.91278e-05	0.411636	GINS4
8	41482361	G	2	C	10	AF=0.667	1/1/1	3	0.0385742	0.358815	AGPAT6
8	41513809	T	21	C	67	AF=0.667	1/1/1	3	9.20308e-07	0.0697875	ANK1, NKX6-3
8	41514297	G	17	C	42	AF=0.667	1/1/1	3	0.00154717	0.493837	ANK1, NKX6-3
8	41516790	A	100	G	39	AF=0.333	1/1/1	3	2.33137e-07	0.208035	ANK1, NKX6-3
8	41516915	C	9	T	35	AF=0.667	1/1/1	3	0.000106045	0.0787101	ANK1, NKX6-3
8	41583294	C	94	T	220	AF=0.667	1/1/1	3	8.60675e-13	0.231011	ANK1, NKX6-3
8	41653066	A	21	G	4	AF=0.333	1/1/1	3	0.000910521	0.0877184	ANK1
8	41686527	A	22	T	4	AF=0.333	1/1/1	3	0.000533521	0.0605731	ANK1
8	41689216	G	20	A	6	AF=0.333	1/1/1	3	0.00935531	0.30574	ANK1
8	41790109	G	139	A	63	AF=0.333	1/1/1	3	9.3688e-08	0.551058	KAT6A
8	42385210	T	39	A	102	AF=0.667	1/1/1	3	1.10422e-07	0.179902	SLC20A2
8	42388301	T	50	C	25	AF=0.333	1/1/1	3	0.00522824	1	SLC20A2
8	49987910	G	11	A	40	AF=0.667	1/1/1	3	5.70381e-05	0.100887	C8orf22
8	50219901	C	19	G	6	AF=0.333	1/1/1	3	0.0146333	0.399621	None
8	52746153	C	45	T	14	AF=0.333	1/1/1	3	6.53063e-05	0.129863	PCMTD1
8	56676535	C	135	G	70	AF=0.333	1/1/1	3	6.61481e-06	0.824135	TMEM68
8	56685933	C	20	A	5	AF=0.333	1/1/1	3	0.00407732	0.203802	TGS1
8	56708701	T	62	C	93	AF=0.667	1/1/1	3	0.0156936	0.0879229	TGS1
8	56723557	T	28	G	83	AF=0.667	1/1/1	3	1.6752e-07	0.0862916	TGS1
8	56724410	G	3	A	13	AF=0.667	1/1/1	3	0.0212708	0.292529	TGS1
8	57129291	A	33	T	10	AF=0.333	1/1/1	3	0.000606107	0.195978	CHCHD7
8	57873844	A	81	T	33	AF=0.333	1/1/1	3	8.00432e-06	0.371292	IMPAD1
8	57875588	G	43	A	21	AF=0.333	1/1/1	3	0.0081469	1	IMPAD1
8	59496490	A	207	G	125	AF=0.333	1/1/1	3	7.9379e-06	0.10283	NSMAF
8	59512955	G	44	A	13	AF=0.333	1/1/1	3	4.71044e-05	0.121056	NSMAF
8	61193809	A	51	G	107	AF=0.667	1/1/1	3	9.89772e-06	0.865988	CA8
8	61534428	A	141	G	78	AF=0.333	1/1/1	3	2.47842e-05	0.473799	RAB2A
8	61535125	C	30	G	7	AF=0.333	1/1/1	3	0.000191076	0.079769	RAB2A
8	63951728	G	12	A	39	AF=0.667	1/1/1	3	0.000198039	0.180331	None
[truncated: 2,484 more rows]

## Sheet: Rep1_False_Negative_ASE
Chr	Position	Ref allele	# RNA-seq reads of ref allele	Alt allele	# RNA-seq reads of alt allele	Frequency of alt allele in WGS	Genotype in WGS	CN	Binomial test p=0.5	Binomial test p=AF	Gene Overlap
1	3773588	C	113	G	98	AF=0.75	0/1/1/1	4	0.335161	8.48372e-19	CEP104
1	11862214	T	4	C	12	AF=0.25	0/1/1/1	4	0.0768127	3.81072e-05	MTHFR
1	12124259	A	4	G	9	AF=0.25	0/1/1/1	4	0.266846	0.000989124	TNFRSF8
1	16932051	T	52	A	34	AF=0.25	0/1/1/1	4	0.0661526	0.00380149	NBPF1
1	16932144	A	73	C	74	AF=0.25	0/1/1/1	4	1	4.502e-11	NBPF1
1	16962875	A	20	G	31	AF=0.25	0/1/1/1	4	0.16078	6.70038e-08	CROCCP2, FLJ00313
1	21671943	T	26	G	31	AF=0.75	0/1/1/1	4	0.596642	0.000672807	ECE1
1	22038094	G	6	A	10	AF=0.25	0/1/1/1	4	0.454498	0.00164447	USP48
1	22052231	A	54	G	70	AF=0.75	0/1/1/1	4	0.177732	6.34282e-06	USP48
1	22357488	C	35	A	26	AF=0.75	0/1/1/1	4	0.305677	1.00148e-07	LINC00339
1	26598281	T	38	C	51	AF=0.75	0/1/1/1	4	0.203117	0.000311474	CEP85
1	27655773	A	11	C	21	AF=0.25	0/1/1/1	4	0.110184	1.47966e-06	TMEM222
1	31837089	T	199	C	203	AF=0.25	0/1/1/1	4	0.881083	6.36485e-28	ZCCHC17
1	36102034	C	8	T	12	AF=0.25	0/1/1/1	4	0.503445	0.000935392	PSMB2
1	40033905	G	61	A	49	AF=0.75	0/1/1/1	4	0.294234	1.05552e-11	PABPC4
1	43298067	T	37	C	25	AF=0.25	0/1/1/1	4	0.161881	0.00784288	ERMAP
1	47829507	C	6	T	5	AF=0.75	0/1/1/1	4	1	0.0343275	CMPK1
1	55505668	C	186	T	164	AF=0.333	0/1/1/1	3	0.261622	1.53732e-07	PCSK9
1	55505926	C	16	T	24	AF=0.333	0/1/1/1	3	0.268187	0.000614198	PCSK9
1	55524197	A	89	G	78	AF=0.667	0/1/1/1	3	0.439129	1.51001e-07	PCSK9
1	55524237	G	74	A	92	AF=0.667	0/1/1/1	3	0.186854	0.0029045	PCSK9
1	55527918	C	11	T	6	AF=0.667	0/1/1/1	3	0.332306	0.00896458	PCSK9
1	59011924	A	10	G	14	AF=0.333	0/1/1/1	3	0.541256	0.0151579	DAB1, OMA1
1	59122871	C	55	T	65	AF=0.667	0/1/1/1	3	0.411423	0.00477702	MYSM1
1	59125515	C	64	T	68	AF=0.667	0/1/1/1	3	0.794123	0.00040211	MYSM1
1	62148611	A	13	G	18	AF=0.333	0/1/1/1	3	0.47313	0.00643971	TM2D1
1	63330217	G	60	A	69	AF=0.333	0/1/1/1	3	0.481354	3.35323e-06	ATG4C
1	63880552	G	12	A	5	AF=0.667	0/1/1/1	3	0.143463	0.00288012	ALG6
1	63915343	A	50	G	41	AF=0.667	0/1/1/1	3	0.401813	2.8326e-05	ITGB3BP
1	65613729	T	20	G	13	AF=0.667	0/1/1/1	3	0.296206	0.00141613	AK4
1	65613730	T	20	A	13	AF=0.667	0/1/1/1	3	0.296206	0.00141613	AK4
1	65696189	T	29	G	22	AF=0.667	0/1/1/1	3	0.401062	0.000558737	AK4
1	65900357	G	124	T	107	AF=0.333	0/1/1/1	3	0.29245	4.63656e-05	LEPR, LEPROT
1	66092570	A	4	G	8	AF=0.333	0/1/1/1	3	0.387695	0.0263932	LEPR
1	67779676	A	9	G	14	AF=0.333	0/1/1/1	3	0.404873	0.00725583	IL12RB2
1	67875106	C	12	A	9	AF=0.667	0/1/1/1	3	0.663624	0.0339537	SERBP1
1	67875414	T	75	C	57	AF=0.667	0/1/1/1	3	0.138668	4.48507e-08	SERBP1
1	67876484	C	84	T	112	AF=0.667	0/1/1/1	3	0.0535063	0.00619995	SERBP1
1	68151980	T	39	G	28	AF=0.667	0/1/1/1	3	0.221549	3.92635e-05	GADD45A
1	68152438	C	10	T	6	AF=0.667	0/1/1/1	3	0.454498	0.0173614	GADD45A
1	70714622	A	9	C	12	AF=0.333	0/1/1/1	3	0.663624	0.0339537	SRSF11
1	71477539	A	34	G	42	AF=0.667	0/1/1/1	3	0.422191	0.0385058	PTGER3
1	74668896	G	4	A	9	AF=0.333	0/1/1/1	3	0.266846	0.0139305	FPGT, FPGT-TNNI3K
1	76190568	C	7	T	12	AF=0.333	0/1/1/1	3	0.359283	0.0121329	ACADM
1	76259652	G	111	T	91	AF=0.667	0/1/1/1	3	0.181135	2.97066e-10	RABGGTB
1	77688227	A	10	G	15	AF=0.333	0/1/1/1	3	0.424356	0.00908019	None
1	78029102	G	23	A	24	AF=0.333	0/1/1/1	3	1	0.0127477	None
1	78201745	G	150	T	172	AF=0.667	0/1/1/1	3	0.241842	8.04215e-07	USP33
1	78343510	C	22	T	27	AF=0.333	0/1/1/1	3	0.568172	0.00207526	FAM73A
1	78419082	C	23	A	14	AF=0.667	0/1/1/1	3	0.187742	0.000361318	FUBP1
1	78483422	T	12	A	24	AF=0.333	0/1/1/1	3	0.0652453	5.25019e-05	None
1	85147644	C	4	T	12	AF=0.333	0/1/1/1	3	0.0768127	0.000784383	SSX2IP
1	85624006	C	26	G	14	AF=0.667	0/1/1/1	3	0.0806905	6.08054e-05	SYDE2
1	85640661	T	17	C	14	AF=0.667	0/1/1/1	3	0.7201	0.0203061	SYDE2
1	85732065	A	7	G	12	AF=0.333	0/1/1/1	3	0.359283	0.0121329	BCL10
1	85732941	A	27	C	32	AF=0.333	0/1/1/1	3	0.602923	0.00125075	BCL10
1	85741968	G	5	C	10	AF=0.333	0/1/1/1	3	0.301758	0.0107384	BCL10
1	86117583	T	13	C	18	AF=0.333	0/1/1/1	3	0.47313	0.00643971	ZNHIT6
1	87212999	A	41	G	52	AF=0.333	0/1/1/1	3	0.299732	7.95448e-06	SH3GLB1
1	89416738	C	22	G	12	AF=0.667	0/1/1/1	3	0.121449	0.000195692	CCBL2
1	90049040	A	27	G	30	AF=0.333	0/1/1/1	3	0.791366	0.00288378	LRRC8B
1	90059575	G	83	T	64	AF=0.333	0/1/1/1	3	0.137378	0.010888	LRRC8B
1	91305125	A	3	C	8	AF=0.333	0/1/1/1	3	0.226562	0.00876373	AK022898
1	92148839	T	45	C	37	AF=0.333	0/1/1/1	3	0.439705	0.0259791	TGFBR3
1	92177938	A	64	G	59	AF=0.333	0/1/1/1	3	0.718509	0.000768458	TGFBR3
1	92185657	C	41	T	47	AF=0.667	0/1/1/1	3	0.594288	0.0123077	TGFBR3
1	92262874	T	13	C	24	AF=0.333	0/1/1/1	3	0.0988717	0.000142636	TGFBR3
1	92975464	C	44	T	48	AF=0.667	0/1/1/1	3	0.754652	0.00391612	EVI5
1	92975493	A	40	G	43	AF=0.333	0/1/1/1	3	0.826405	0.000630079	EVI5
1	93073228	C	9	A	5	AF=0.667	0/1/1/1	3	0.42395	0.0207631	EVI5
1	93616202	T	16	C	11	AF=0.667	0/1/1/1	3	0.442068	0.00680476	TMED5
1	93646207	T	21	C	18	AF=0.667	0/1/1/1	3	0.749259	0.009858	TMED5
1	93711782	T	11	A	3	AF=0.667	0/1/1/1	3	0.057373	0.000684325	CCDC18
1	93802264	T	57	A	72	AF=0.667	0/1/1/1	3	0.217561	0.0113503	LOC100131564
1	95660556	A	74	G	88	AF=0.667	0/1/1/1	3	0.307067	0.00110204	AK090700, TMEM56, TMEM56-RWDD3
1	95660921	C	26	G	17	AF=0.667	0/1/1/1	3	0.222053	0.000285787	AK090700, TMEM56, TMEM56-RWDD3
1	100170502	T	24	C	28	AF=0.333	0/1/1/1	3	0.677809	0.0028388	None
1	100336361	C	8	T	18	AF=0.333	0/1/1/1	3	0.0755187	0.000221127	AGL
1	100547994	T	79	C	96	AF=0.667	0/1/1/1	3	0.226375	0.00126799	HIAT1
1	100744650	A	10	G	6	AF=0.667	0/1/1/1	3	0.454498	0.0173614	RTCA
1	100754434	A	3	G	10	AF=0.333	0/1/1/1	3	0.0922852	0.00163342	RTCA
1	100970346	T	12	C	9	AF=0.667	0/1/1/1	3	0.663624	0.0339537	CDC14A
1	101338324	T	124	C	135	AF=0.667	0/1/1/1	3	0.534438	1.26633e-06	EXTL2
1	101338482	A	76	G	89	AF=0.667	0/1/1/1	3	0.350234	0.000677084	EXTL2
1	101489461	A	14	T	16	AF=0.333	0/1/1/1	3	0.855536	0.0309569	DPH5
1	101543389	G	4	T	9	AF=0.333	0/1/1/1	3	0.266846	0.0139305	BC045807, BX538249
1	110586942	C	46	A	31	AF=0.25	0/1/1/1	4	0.110016	0.00344194	STRIP1
1	144858090	T	11	G	4	AF=0.667	0/1/1/1	3	0.118469	0.0017905	LOC100288142, LOC653513, NBPF9, PDE4DIP
1	144908068	A	9	G	5	AF=0.667	0/1/1/1	3	0.42395	0.0207631	LOC100288142, LOC653513, NBPF9, PDE4DIP
1	144990684	G	11	A	15	AF=0.333	0/1/1/1	3	0.557197	0.0116391	LOC100288142, LOC653513, NBPF9, PDE4DIP
1	145097094	T	19	G	15	AF=0.667	0/1/1/1	3	0.607591	0.00954535	LOC100288142, NBPF9, SEC22B
1	145103928	G	256	A	233	AF=0.333	0/1/1/1	3	0.319798	6.65305e-11	LOC100288142, NBPF9, SEC22B
1	145689271	A	14	G	16	AF=0.333	0/1/1/1	3	0.855536	0.0309569	LOC100288142, NBPF10
1	146714392	G	158	C	143	AF=0.667	0/1/1/1	3	0.419743	9.03404e-12	CHD1L
1	146714427	G	161	C	164	AF=0.333	0/1/1/1	3	0.911686	1.96873e-10	CHD1L
1	146735636	G	13	A	8	AF=0.667	0/1/1/1	3	0.38331	0.00906972	CHD1L
1	146746030	A	18	G	21	AF=0.333	0/1/1/1	3	0.749259	0.009858	CHD1L
1	150267798	T	14	C	19	AF=0.333	0/1/1/1	3	0.48685	0.00486711	MRPS21
1	150270209	A	3	G	7	AF=0.333	0/1/1/1	3	0.34375	0.0195481	MRPS21
1	150274305	G	9	C	13	AF=0.333	0/1/1/1	3	0.523467	0.0208981	MRPS21
1	150281202	A	39	C	50	AF=0.333	0/1/1/1	3	0.289096	1.31063e-05	None
1	150446673	A	32	G	45	AF=0.333	0/1/1/1	3	0.171061	8.30332e-06	RPRD2
1	150447398	A	43	G	35	AF=0.667	0/1/1/1	3	0.428207	9.22975e-05	RPRD2
1	150483355	C	58	T	48	AF=0.667	0/1/1/1	3	0.382126	6.74714e-06	ECM1
1	150527354	G	9	A	5	AF=0.667	0/1/1/1	3	0.42395	0.0207631	ADAMTSL4
1	150542128	A	12	G	5	AF=0.667	0/1/1/1	3	0.143463	0.00288012	None
1	150588692	C	17	T	14	AF=0.667	0/1/1/1	3	0.7201	0.0203061	None
1	150604110	G	12	T	9	AF=0.667	0/1/1/1	3	0.663624	0.0339537	None
1	150738197	C	26	T	29	AF=0.667	0/1/1/1	3	0.787706	0.0318678	CTSS
1	150808889	C	75	G	58	AF=0.333	0/1/1/1	3	0.165083	0.0129796	ARNT
1	150923099	T	39	C	46	AF=0.333	0/1/1/1	3	0.515426	0.000114096	SETDB1
1	150940625	T	361	G	387	AF=0.667	0/1/1/1	3	0.360678	2.97727e-17	CERS2
1	151006691	C	48	T	59	AF=0.667	0/1/1/1	3	0.333705	0.0135669	PRUNE
1	151028929	C	2	T	9	AF=0.333	0/1/1/1	3	0.0654297	0.0013606	CDC42SE1
1	151089885	G	37	C	44	AF=0.667	0/1/1/1	3	0.505236	0.0243894	GABPB2
1	151089888	A	39	C	44	AF=0.667	0/1/1/1	3	0.660884	0.0101367	GABPB2
1	151097367	C	30	T	26	AF=0.333	0/1/1/1	3	0.68888	0.0462668	None
1	151669555	C	29	A	29	AF=0.333	0/1/1/1	3	1	0.0113589	KIAA0488, SNX27
1	151735441	G	37	A	33	AF=0.667	0/1/1/1	3	0.720203	0.000849915	MRPL9
1	151862661	G	90	A	101	AF=0.667	0/1/1/1	3	0.469421	8.18062e-05	THEM4
1	153906397	A	32	G	31	AF=0.333	0/1/1/1	3	1	0.0104841	DENND4B
1	153913699	T	7	G	16	AF=0.333	0/1/1/1	3	0.0931396	0.000499885	DENND4B
1	153926078	T	55	C	67	AF=0.333	0/1/1/1	3	0.319308	1.05796e-06	CRTC2
1	153931835	G	305	T	315	AF=0.667	0/1/1/1	3	0.717796	4.22323e-16	SLC39A1
1	154948327	G	30	T	26	AF=0.667	0/1/1/1	3	0.68888	0.00252132	CKS1B
1	154988957	A	124	G	100	AF=0.333	0/1/1/1	3	0.124163	0.000483624	ZBTB7B
1	155028774	T	15	G	8	AF=0.667	0/1/1/1	3	0.21004	0.00285358	ADAM15, LOC100505666
1	155286258	C	76	T	81	AF=0.667	0/1/1/1	3	0.749665	9.00422e-05	FDPS
1	155639566	C	3	A	11	AF=0.333	0/1/1/1	3	0.057373	0.000684325	YY1AP1
1	155951502	A	8	G	4	AF=0.667	0/1/1/1	3	0.387695	0.0263932	ARHGEF2
1	155952328	C	18	T	10	AF=0.667	0/1/1/1	3	0.184933	0.000952335	ARHGEF2
1	156181530	A	39	G	33	AF=0.333	0/1/1/1	3	0.555998	0.0326474	SLC25A44
1	156566491	A	19	G	12	AF=0.667	0/1/1/1	3	0.281042	0.00176046	APOA1BP, GPATCH4
1	156612932	T	175	C	201	AF=0.667	0/1/1/1	3	0.197236	1.24053e-07	BC005081, BCAN
1	156623625	C	15	T	6	AF=0.667	0/1/1/1	3	0.0783539	0.000602161	BCAN
1	156708244	C	22	G	13	AF=0.667	0/1/1/1	3	0.175465	0.000443023	MRPL24
1	156760036	G	10	C	7	AF=0.667	0/1/1/1	3	0.629059	0.0368036	PRCC
1	156776717	T	7	C	14	AF=0.333	0/1/1/1	3	0.189247	0.00201017	SH2D2A
1	158580887	T	111	C	89	AF=0.667	0/1/1/1	3	0.137367	1.38348e-10	SPTA1
1	158582838	G	3	C	7	AF=0.333	0/1/1/1	3	0.34375	0.0195481	SPTA1
1	158586277	G	9	A	19	AF=0.333	0/1/1/1	3	0.0871586	0.000206176	SPTA1
1	158592935	G	77	A	64	AF=0.667	0/1/1/1	3	0.312213	2.28451e-07	SPTA1
1	158606449	G	91	T	102	AF=0.667	0/1/1/1	3	0.471732	6.64222e-05	SPTA1
1	158607935	T	79	G	100	AF=0.333	0/1/1/1	3	0.134724	7.95528e-10	SPTA1
1	158631171	A	68	C	56	AF=0.333	0/1/1/1	3	0.323248	0.00734207	SPTA1
1	159889686	G	12	A	6	AF=0.667	0/1/1/1	3	0.237885	0.00456538	TAGLN2
1	159995288	C	28	A	27	AF=0.667	0/1/1/1	3	1	0.00925354	None
1	159995809	G	28	A	33	AF=0.667	0/1/1/1	3	0.608921	0.0415471	None
1	160000435	A	57	T	76	AF=0.667	0/1/1/1	3	0.11824	0.0214124	PIGM
1	160185534	G	10	A	12	AF=0.333	0/1/1/1	3	0.831812	0.0418515	DCAF8
1	160252237	A	156	G	132	AF=0.333	0/1/1/1	3	0.175222	1.08834e-05	DCAF8, PEX19
1	160309450	G	17	C	16	AF=0.667	0/1/1/1	3	1	0.0401064	COPA
1	160511648	C	11	T	8	AF=0.667	0/1/1/1	3	0.647606	0.0286644	CD84
1	161307319	A	10	G	4	AF=0.667	0/1/1/1	3	0.179565	0.00400617	SDHC
1	161476533	T	20	C	11	AF=0.667	0/1/1/1	3	0.149613	0.000427488	FCGR2A
1	161718740	C	13	G	6	AF=0.667	0/1/1/1	3	0.167068	0.00231089	None
1	161724376	A	12	G	19	AF=0.333	0/1/1/1	3	0.281042	0.00176046	DUSP12
1	161751741	A	145	G	179	AF=0.667	0/1/1/1	3	0.0665873	2.01529e-05	ATF6
1	162563661	C	12	T	15	AF=0.75	0/1/1/1	4	0.701108	0.0258553	UAP1
1	163215128	C	13	T	7	AF=0.75	0/1/1/1	4	0.263176	0.000183704	RGS5
1	163279188	C	15	T	13	AF=0.75	0/1/1/1	4	0.850554	0.00143604	RGS5
1	163280158	C	14	T	14	AF=0.75	0/1/1/1	4	1	0.00409886	RGS5
1	163282358	G	5	A	13	AF=0.25	0/1/1/1	4	0.0962524	3.42457e-05	RGS5
1	163317182	C	9	G	7	AF=0.75	0/1/1/1	4	0.803619	0.00746972	NUF2
1	165874028	G	5	A	13	AF=0.25	0/1/1/1	4	0.0962524	3.42457e-05	UCK2
1	165876705	A	8	G	7	AF=0.75	0/1/1/1	4	1	0.0172998	UCK2
1	165877575	A	41	C	57	AF=0.75	0/1/1/1	4	0.129293	0.00025769	UCK2
1	167513648	G	10	C	10	AF=0.75	0/1/1/1	4	1	0.0170356	CREG1
1	167611038	G	18	A	20	AF=0.25	0/1/1/1	4	0.871415	0.000255597	RCSD1
1	167675649	T	47	C	39	AF=0.25	0/1/1/1	4	0.450548	4.77132e-05	None
1	167676718	C	21	T	15	AF=0.25	0/1/1/1	4	0.405032	0.0319561	None
1	168187686	T	7	C	8	AF=0.25	0/1/1/1	4	1	0.0172998	None
1	169442698	C	10	T	16	AF=0.25	0/1/1/1	4	0.32694	8.59372e-05	SLC19A2
1	171714111	T	10	C	5	AF=0.75	0/1/1/1	4	0.301758	0.000794949	None
1	171714200	G	8	A	5	AF=0.75	0/1/1/1	4	0.581055	0.00564933	None
1	173764414	A	17	G	31	AF=0.25	0/1/1/1	4	0.0594634	8.37495e-09	None
1	173820593	G	29	A	18	AF=0.25	0/1/1/1	4	0.143865	0.0426465	DARS2
1	173857037	C	21	T	23	AF=0.25	0/1/1/1	4	0.880396	0.000144653	None
1	173859100	A	18	G	29	AF=0.25	0/1/1/1	4	0.143865	1.11141e-07	None
1	174150850	T	10	C	10	AF=0.25	0/1/1/1	4	1	0.0170356	RABGAP1L
1	174214856	C	21	T	19	AF=0.25	0/1/1/1	4	0.874629	0.00272408	RABGAP1L
1	174962082	C	23	T	17	AF=0.75	0/1/1/1	4	0.429591	1.23046e-05	RABGAP1L
1	175938640	G	4	A	6	AF=0.25	0/1/1/1	4	0.753906	0.0197277	RFWD2
1	176852547	G	26	T	21	AF=0.75	0/1/1/1	4	0.560065	1.021e-05	ASTN1
1	179044723	A	141	G	169	AF=0.75	0/1/1/1	4	0.125016	7.8603e-15	FAM20B
1	179070334	C	33	G	24	AF=0.75	0/1/1/1	4	0.289244	2.08548e-07	ABL2
1	179072966	C	32	T	41	AF=0.75	0/1/1/1	4	0.349182	0.000582333	ABL2
1	179074869	T	17	G	13	AF=0.75	0/1/1/1	4	0.584665	0.000215694	ABL2
1	179136269	G	4	C	6	AF=0.25	0/1/1/1	4	0.753906	0.0197277	ABL2
1	179324870	C	5	A	6	AF=0.25	0/1/1/1	4	1	0.0343275	SOAT1
1	179326323	A	9	G	8	AF=0.25	0/1/1/1	4	1	0.0477537	SOAT1
1	179811936	T	30	C	24	AF=0.25	0/1/1/1	4	0.496617	0.00234083	TOR1AIP2
1	179888228	G	69	C	66	AF=0.75	0/1/1/1	4	0.863415	9.00452e-11	TOR1AIP1
1	179890655	C	7	T	10	AF=0.25	0/1/1/1	4	0.629059	0.00310078	None
1	179959297	C	9	T	12	AF=0.25	0/1/1/1	4	0.663624	0.00168708	CEP350
1	180136504	C	9	G	4	AF=0.75	0/1/1/1	4	0.266846	0.000989124	QSOX1
1	180853815	T	33	C	23	AF=0.75	0/1/1/1	4	0.228806	7.3731e-08	XPR1
1	180921330	G	4	A	8	AF=0.25	0/1/1/1	4	0.387695	0.00278151	AK056657
1	180936817	G	16	A	17	AF=0.75	0/1/1/1	4	1	0.00389714	AK056657
1	180936823	A	13	G	17	AF=0.75	0/1/1/1	4	0.584665	0.0321895	AK056657
1	180953853	A	92	G	69	AF=0.25	0/1/1/1	4	0.0826258	9.51243e-07	STX6
1	181026558	G	32	A	42	AF=0.25	0/1/1/1	4	0.295413	6.71415e-09	MR1
1	181027086	T	14	C	25	AF=0.25	0/1/1/1	4	0.108129	2.89566e-07	MR1
1	182358196	C	19	G	29	AF=0.75	0/1/1/1	4	0.193413	0.0286554	GLUL
1	183934680	T	17	C	13	AF=0.25	0/1/1/1	4	0.584665	0.0321895	COLGALT2
1	184763999	A	66	G	70	AF=0.75	0/1/1/1	4	0.797102	3.62541e-09	FAM129A
1	184764067	C	39	G	38	AF=0.25	0/1/1/1	4	1	4.31531e-06	FAM129A
1	184772100	C	19	G	10	AF=0.75	0/1/1/1	4	0.136046	4.89827e-06	FAM129A
1	184777880	C	6	A	14	AF=0.25	0/1/1/1	4	0.115318	2.95117e-05	FAM129A
1	184801065	T	42	C	58	AF=0.75	0/1/1/1	4	0.133211	0.000190155	FAM129A
1	193084045	T	11	C	8	AF=0.75	0/1/1/1	4	0.647606	0.00228843	None
1	196654324	A	97	C	90	AF=0.75	0/1/1/1	4	0.660948	3.62712e-15	CFH
1	196672385	G	11	A	4	AF=0.75	0/1/1/1	4	0.118469	0.000115336	CFH, CFHR4
1	196673430	T	7	G	4	AF=0.75	0/1/1/1	4	0.548828	0.00756121	CFH, CFHR4
1	196677163	C	9	A	6	AF=0.75	0/1/1/1	4	0.607239	0.00419301	CFH, CFHR4
1	196877689	C	58	G	38	AF=0.25	0/1/1/1	4	0.0519105	0.00195317	CFHR4
1	197070776	C	62	T	59	AF=0.25	0/1/1/1	4	0.855822	1.98801e-08	ASPM
1	197959936	C	8	T	4	AF=0.75	0/1/1/1	4	0.387695	0.00278151	None
1	197960635	G	65	C	64	AF=0.75	0/1/1/1	4	1	6.1524e-10	None
1	197964342	A	21	G	17	AF=0.75	0/1/1/1	4	0.627103	8.34271e-05	None
1	200639028	A	32	G	37	AF=0.75	0/1/1/1	4	0.630456	0.000126694	DDX59
1	200639047	T	22	G	31	AF=0.75	0/1/1/1	4	0.271679	0.0100862	DDX59
1	200639050	A	23	C	31	AF=0.75	0/1/1/1	4	0.340891	0.00440774	DDX59
1	200941716	G	36	A	23	AF=0.25	0/1/1/1	4	0.117477	0.0161829	KIF21B
1	201645454	C	2	T	8	AF=0.25	0/1/1/1	4	0.109375	0.000415802	NAV1
1	201790826	T	22	C	10	AF=0.75	0/1/1/1	4	0.0501025	2.40614e-07	NAV1
1	202129826	T	20	C	20	AF=0.75	0/1/1/1	4	1	0.000716575	PTPN7
1	202134974	G	22	A	34	AF=0.75	0/1/1/1	4	0.140895	0.0195536	None
1	202136137	G	22	T	29	AF=0.75	0/1/1/1	4	0.401062	0.00523491	None
1	202139101	C	50	G	68	AF=0.75	0/1/1/1	4	0.117213	4.14488e-05	PTPRVP
1	202143512	A	13	G	9	AF=0.75	0/1/1/1	4	0.523467	0.000700489	PTPRVP
1	202144240	C	8	T	9	AF=0.75	0/1/1/1	4	1	0.0477537	PTPRVP
1	202147456	T	14	C	18	AF=0.75	0/1/1/1	4	0.596615	0.0225725	PTPRVP
1	202148042	T	8	C	8	AF=0.75	0/1/1/1	4	1	0.0371526	PTPRVP
1	202153583	C	7	T	4	AF=0.75	0/1/1/1	4	0.548828	0.00756121	PTPRVP
1	202457873	T	12	C	8	AF=0.75	0/1/1/1	4	0.503445	0.000935392	PPP1R12B
1	202550272	G	44	A	35	AF=0.75	0/1/1/1	4	0.368188	9.67203e-09	PPP1R12B
1	202550547	G	18	A	17	AF=0.75	0/1/1/1	4	1	0.00123249	PPP1R12B
1	202848587	G	40	A	26	AF=0.25	0/1/1/1	4	0.108857	0.00997734	RABIF
1	202878808	C	20	T	10	AF=0.75	0/1/1/1	4	0.0987371	1.82064e-06	KLHL12
1	202983294	G	7	A	10	AF=0.25	0/1/1/1	4	0.629059	0.00310078	TMEM183A
1	203652444	A	26	G	38	AF=0.25	0/1/1/1	4	0.168643	5.74967e-09	ATP2B4
1	203709034	A	44	G	54	AF=0.25	0/1/1/1	4	0.363354	2.23564e-10	ATP2B4
1	203709068	T	57	C	50	AF=0.25	0/1/1/1	4	0.562093	1.57303e-06	ATP2B4
1	203713133	G	31	A	41	AF=0.25	0/1/1/1	4	0.288784	9.14312e-09	ATP2B4
1	203832660	G	14	T	10	AF=0.75	0/1/1/1	4	0.541256	0.000523093	SNRPE
1	204499056	A	10	G	4	AF=0.75	0/1/1/1	4	0.179565	0.000341874	MDM4
1	204521577	G	39	A	57	AF=0.75	0/1/1/1	4	0.0821931	0.00084328	MDM4
1	205055162	T	3	C	8	AF=0.25	0/1/1/1	4	0.226562	0.00118828	None
1	205115428	C	9	T	11	AF=0.25	0/1/1/1	4	0.823803	0.00394214	DSTYK
1	205179130	G	17	A	19	AF=0.25	0/1/1/1	4	0.867939	0.00035522	DSTYK
1	206636879	T	13	C	12	AF=0.75	0/1/1/1	4	1	0.00412299	SRGAP2
1	206759637	C	7	G	5	AF=0.75	0/1/1/1	4	0.774414	0.0142528	RASSF5
1	206759783	A	7	G	5	AF=0.75	0/1/1/1	4	0.774414	0.0142528	RASSF5
1	206773822	C	8	T	6	AF=0.75	0/1/1/1	4	0.790527	0.0103095	EIF2D
1	206776097	G	11	A	9	AF=0.75	0/1/1/1	4	0.823803	0.00394214	EIF2D
1	206777615	A	21	G	36	AF=0.75	0/1/1/1	4	0.0627367	0.0462245	EIF2D
1	207246004	A	36	G	28	AF=0.75	0/1/1/1	4	0.381733	1.10027e-07	PFKFB2
1	207496129	C	14	T	18	AF=0.75	0/1/1/1	4	0.596615	0.0225725	CD55
1	207820313	A	12	G	17	AF=0.25	0/1/1/1	4	0.458258	0.000121848	CR1L
1	207933246	T	32	G	26	AF=0.25	0/1/1/1	4	0.511842	0.00117077	CD46
1	207933648	T	17	C	25	AF=0.75	0/1/1/1	4	0.279956	0.0305955	CD46
1	207959665	A	20	G	15	AF=0.75	0/1/1/1	4	0.49956	5.13169e-05	CD46
1	210698391	C	18	T	11	AF=0.75	0/1/1/1	4	0.264931	2.61618e-05	HHAT
1	211745154	C	36	G	22	AF=0.25	0/1/1/1	4	0.0869489	0.0323822	None
1	211837911	C	22	T	28	AF=0.25	0/1/1/1	4	0.479888	3.48315e-06	NEK2
1	211838498	G	34	C	39	AF=0.25	0/1/1/1	4	0.639973	2.11347e-07	NEK2
1	211839312	A	14	G	18	AF=0.75	0/1/1/1	4	0.596615	0.0225725	NEK2
1	211920427	T	36	C	25	AF=0.25	0/1/1/1	4	0.200031	0.00703991	LPGAT1
1	211920624	G	53	A	40	AF=0.75	0/1/1/1	4	0.213153	5.67531e-11	LPGAT1
1	211921229	C	40	A	46	AF=0.75	0/1/1/1	4	0.590036	1.57064e-05	LPGAT1
1	212121008	C	12	G	14	AF=0.75	0/1/1/1	4	0.845019	0.0209241	INTS7
1	212787092	A	7	G	6	AF=0.75	0/1/1/1	4	1	0.0242901	ATF3
1	212909472	A	11	T	13	AF=0.25	0/1/1/1	4	0.83882	0.00309744	NSL1
1	212944554	A	21	G	18	AF=0.25	0/1/1/1	4	0.749259	0.00461878	NSL1
1	212984807	T	14	C	19	AF=0.75	0/1/1/1	4	0.48685	0.0266602	TATDN3
1	214505640	A	22	G	33	AF=0.75	0/1/1/1	4	0.177001	0.0181862	SMYD2
1	214787130	G	136	A	171	AF=0.75	0/1/1/1	4	0.0521439	2.48614e-13	CENPF
1	219368051	A	7	G	14	AF=0.25	0/1/1/1	4	0.189247	6.80598e-05	LYPLAL1
1	219377340	G	9	C	9	AF=0.25	0/1/1/1	4	1	0.0249855	LYPLAL1
1	219377377	G	12	T	15	AF=0.25	0/1/1/1	4	0.701108	0.00109806	LYPLAL1
1	219377409	G	13	T	14	AF=0.25	0/1/1/1	4	1	0.00287327	LYPLAL1
1	219385985	A	19	G	26	AF=0.75	0/1/1/1	4	0.371298	0.0144431	LYPLAL1
1	220193247	C	7	T	14	AF=0.25	0/1/1/1	4	0.189247	6.80598e-05	EPRS, RNU5F-1
1	223945766	G	18	T	19	AF=0.25	0/1/1/1	4	1	0.000827404	CAPN2
1	224051461	A	16	G	24	AF=0.75	0/1/1/1	4	0.268187	0.0422871	None
1	224059162	T	8	C	3	AF=0.75	0/1/1/1	4	0.226562	0.00118828	None
1	224575018	C	49	T	50	AF=0.25	0/1/1/1	4	1	6.64511e-08	WDR26
1	224577942	T	6	C	13	AF=0.25	0/1/1/1	4	0.167068	8.34791e-05	WDR26
1	224577959	C	8	T	19	AF=0.25	0/1/1/1	4	0.052239	9.29531e-07	WDR26
1	224578018	C	8	T	8	AF=0.25	0/1/1/1	4	1	0.0371526	WDR26
1	224588825	T	2	A	8	AF=0.25	0/1/1/1	4	0.109375	0.000415802	WDR26
1	224606249	C	22	G	16	AF=0.25	0/1/1/1	4	0.417692	0.0227791	WDR26
1	225974531	A	34	G	29	AF=0.25	0/1/1/1	4	0.614655	0.000356623	SRP9
1	226026406	A	34	G	26	AF=0.25	0/1/1/1	4	0.366294	0.00242548	EPHX1
1	226029646	T	19	G	32	AF=0.25	0/1/1/1	4	0.0919145	1.3687e-08	EPHX1
1	226037318	C	6	G	8	AF=0.25	0/1/1/1	4	0.790527	0.0103095	TMEM63A
1	226433708	T	19	C	20	AF=0.25	0/1/1/1	4	1	0.000561366	LIN9
1	227171035	C	8	A	9	AF=0.25	0/1/1/1	4	1	0.0199017	ADCK3
1	227845283	C	19	A	16	AF=0.75	0/1/1/1	4	0.735879	0.000241728	ZNF678
1	228289843	C	68	T	53	AF=0.25	0/1/1/1	4	0.202924	7.30245e-06	C1orf35
1	228296745	C	37	T	54	AF=0.75	0/1/1/1	4	0.0929469	0.000990496	MRPL55
1	228353651	G	21	C	20	AF=0.75	0/1/1/1	4	1	0.000384871	IBA57
1	228412227	T	12	C	20	AF=0.25	0/1/1/1	4	0.215327	7.98463e-06	OBSCN
1	228412228	G	12	A	21	AF=0.25	0/1/1/1	4	0.162756	3.1059e-06	OBSCN
1	228447513	T	12	G	12	AF=0.25	0/1/1/1	4	1	0.00820304	OBSCN
1	228447519	T	13	A	12	AF=0.25	0/1/1/1	4	1	0.017758	OBSCN
1	228475848	G	16	A	7	AF=0.75	0/1/1/1	4	0.0931396	8.79215e-06	OBSCN
1	228617063	G	5	A	10	AF=0.25	0/1/1/1	4	0.301758	0.000794949	None
1	228684779	G	6	A	15	AF=0.25	0/1/1/1	4	0.0783539	1.02377e-05	None
1	229795714	T	16	C	25	AF=0.75	0/1/1/1	4	0.211024	0.0464986	URB2
1	229796524	G	13	A	15	AF=0.75	0/1/1/1	4	0.850554	0.0145179	None
1	231104225	T	11	C	9	AF=0.75	0/1/1/1	4	0.823803	0.00394214	TTC13
1	231115887	A	12	C	5	AF=0.75	0/1/1/1	4	0.143463	9.98902e-05	ARV1
1	231172686	T	13	C	12	AF=0.75	0/1/1/1	4	1	0.00412299	FAM89A
1	231172810	A	10	G	12	AF=0.75	0/1/1/1	4	0.831812	0.044374	FAM89A
1	231172881	T	15	G	9	AF=0.75	0/1/1/1	4	0.307456	0.000111652	FAM89A
1	231173033	C	15	T	8	AF=0.75	0/1/1/1	4	0.21004	5.45078e-05	FAM89A
1	231406295	T	31	C	34	AF=0.75	0/1/1/1	4	0.804317	7.76139e-05	GNPAT
1	231468953	G	27	A	22	AF=0.25	0/1/1/1	4	0.568172	0.0025401	EXOC8
1	231487993	T	16	C	18	AF=0.75	0/1/1/1	4	0.864166	0.00505137	SPRTN
1	231664203	G	68	C	49	AF=0.75	0/1/1/1	4	0.0956727	3.22009e-14	None
1	231697030	G	9	A	8	AF=0.75	0/1/1/1	4	1	0.0199017	TSNAX, TSNAX-DISC1
1	233105677	G	94	A	119	AF=0.75	0/1/1/1	4	0.0998562	1.50293e-09	NTPCR
1	234611583	T	6	C	4	AF=0.75	0/1/1/1	4	0.753906	0.0197277	TARBP1
1	234611842	G	6	A	5	AF=0.75	0/1/1/1	4	1	0.0343275	TARBP1
1	235460719	C	5	G	6	AF=0.25	0/1/1/1	4	1	0.0343275	ARID4B
1	235494235	C	19	G	28	AF=0.25	0/1/1/1	4	0.24296	5.20323e-07	GGPS1
1	235588409	C	12	A	11	AF=0.25	0/1/1/1	4	1	0.0161959	TBCE
1	236378916	T	17	C	9	AF=0.75	0/1/1/1	4	0.168638	1.62924e-05	ERO1LB
1	236636399	G	5	C	12	AF=0.25	0/1/1/1	4	0.143463	9.98902e-05	EDARADD
1	236649626	T	8	C	8	AF=0.75	0/1/1/1	4	1	0.0371526	None
1	237048500	A	74	G	62	AF=0.25	0/1/1/1	4	0.345593	2.47824e-07	MTR
1	237058362	C	21	T	17	AF=0.25	0/1/1/1	4	0.627103	0.00795629	MTR
1	237058828	C	38	T	39	AF=0.25	0/1/1/1	4	1	1.90029e-06	MTR
1	237061056	A	57	C	63	AF=0.25	0/1/1/1	4	0.64826	1.16066e-10	MTR
1	237063335	G	74	C	68	AF=0.25	0/1/1/1	4	0.674935	4.43062e-09	MTR
1	237065326	C	55	T	71	AF=0.25	0/1/1/1	4	0.181224	7.85778e-14	MTR
1	242011406	T	9	C	13	AF=0.25	0/1/1/1	4	0.523467	0.000700489	None
1	244816968	C	20	A	16	AF=0.75	0/1/1/1	4	0.617719	0.000120109	DESI2
1	244999396	G	13	A	17	AF=0.25	0/1/1/1	4	0.584665	0.000215694	COX20
1	245012509	T	48	G	33	AF=0.25	0/1/1/1	4	0.119274	0.00187831	None
1	245288493	A	4	G	10	AF=0.25	0/1/1/1	4	0.179565	0.000341874	EFCAB2
1	245911962	A	2	G	8	AF=0.25	0/1/1/1	4	0.109375	0.000415802	None
1	245926592	A	4	G	12	AF=0.25	0/1/1/1	4	0.0768127	3.81072e-05	SMYD3
1	245926782	C	8	T	13	AF=0.25	0/1/1/1	4	0.38331	0.000371626	SMYD3
1	246021941	T	507	C	565	AF=0.75	0/1/1/1	4	0.0816504	8.97067e-56	SMYD3
1	246023137	G	16	T	6	AF=0.75	0/1/1/1	4	0.0524788	3.49179e-06	SMYD3
1	246027024	A	7	G	6	AF=0.75	0/1/1/1	4	1	0.0242901	SMYD3
1	246027029	A	7	T	6	AF=0.75	0/1/1/1	4	1	0.0242901	SMYD3
1	246053607	G	23	A	20	AF=0.75	0/1/1/1	4	0.760792	6.34863e-05	SMYD3
1	246055324	C	2	T	9	AF=0.25	0/1/1/1	4	0.0654297	0.000126123	SMYD3
1	246705165	A	23	C	26	AF=0.75	0/1/1/1	4	0.77545	0.000828961	TFB2M
1	246706710	G	6	A	5	AF=0.75	0/1/1/1	4	1	0.0343275	TFB2M
1	246707607	T	8	C	9	AF=0.75	0/1/1/1	4	1	0.0477537	TFB2M
1	246707709	G	8	C	5	AF=0.75	0/1/1/1	4	0.581055	0.00564933	TFB2M
1	246714740	C	20	T	23	AF=0.75	0/1/1/1	4	0.760792	0.0022877	TFB2M
1	246715647	A	15	G	20	AF=0.25	0/1/1/1	4	0.49956	5.13169e-05	TFB2M
1	247010598	A	8	C	4	AF=0.75	0/1/1/1	4	0.387695	0.00278151	AHCTF1
1	247010608	C	10	A	4	AF=0.75	0/1/1/1	4	0.179565	0.000341874	AHCTF1
1	247010610	A	10	C	4	AF=0.75	0/1/1/1	4	0.179565	0.000341874	AHCTF1
1	247010734	C	9	T	7	AF=0.75	0/1/1/1	4	0.803619	0.00746972	AHCTF1
1	247010801	T	23	C	16	AF=0.75	0/1/1/1	4	0.336784	6.85437e-06	AHCTF1
1	247107350	C	18	T	16	AF=0.75	0/1/1/1	4	0.864166	0.000496937	None
1	247150740	T	22	C	15	AF=0.25	0/1/1/1	4	0.324009	0.0361617	ZNF670-ZNF695, ZNF695
1	247199833	A	11	G	14	AF=0.75	0/1/1/1	4	0.690038	0.0366937	ZNF670, ZNF670-ZNF695
1	247352289	C	50	T	49	AF=0.25	0/1/1/1	4	1	1.56597e-07	None
1	247352723	T	20	C	21	AF=0.25	0/1/1/1	4	1	0.000384871	None
1	247358781	T	10	G	11	AF=0.25	0/1/1/1	4	1	0.00880112	None
1	247359800	T	17	C	14	AF=0.25	0/1/1/1	4	0.7201	0.0199708	None
1	247359827	G	3	A	9	AF=0.25	0/1/1/1	4	0.145996	0.000391662	None
1	247362478	G	7	C	8	AF=0.25	0/1/1/1	4	1	0.0172998	None
1	247365430	A	6	G	15	AF=0.25	0/1/1/1	4	0.0783539	1.02377e-05	None
1	247372672	C	39	T	53	AF=0.25	0/1/1/1	4	0.174984	3.41256e-11	None
1	247373571	C	31	A	23	AF=0.25	0/1/1/1	4	0.340891	0.00440774	None
1	247373628	T	8	C	12	AF=0.25	0/1/1/1	4	0.503445	0.000935392	None
1	247479939	G	31	T	22	AF=0.25	0/1/1/1	4	0.271679	0.0100862	ZNF496
1	247479940	T	31	G	21	AF=0.25	0/1/1/1	4	0.211609	0.0153231	ZNF496
1	247484478	G	13	A	18	AF=0.25	0/1/1/1	4	0.47313	9.1486e-05	ZNF496
1	248032277	C	11	T	3	AF=0.75	0/1/1/1	4	0.057373	3.98234e-05	TRIM58
1	248043238	C	31	T	33	AF=0.25	0/1/1/1	4	0.900653	7.07182e-06	TRIM58
2	672745	T	21	C	21	AF=0.333	0/0/1	3	1	0.0317895	TMEM18
2	3589803	A	153	G	130	AF=0.333	0/0/1	3	0.190861	1.20219e-05	None
2	3609064	G	71	A	97	AF=0.667	0/1/1	3	0.0534324	0.017306	LOC100506054
2	7164578	A	21	G	14	AF=0.667	0/1/1	3	0.310505	0.00176138	RNF144A
2	7179961	C	17	T	9	AF=0.667	0/1/1	3	0.168638	0.00118986	RNF144A
2	7182177	G	34	A	38	AF=0.667	0/1/1	3	0.723948	0.0168324	RNF144A
2	7182533	T	41	C	35	AF=0.667	0/1/1	3	0.566573	0.000223293	RNF144A
2	7182534	A	41	T	35	AF=0.667	0/1/1	3	0.566573	0.000223293	RNF144A
2	8995712	G	32	A	29	AF=0.333	0/0/1	3	0.798153	0.020937	None
2	10194487	T	25	C	23	AF=0.333	0/0/1	3	0.885433	0.0450523	KLF11
2	10286746	G	15	T	20	AF=0.333	0/0/1	3	0.49956	0.00386216	C2orf48
2	10287296	A	5	T	13	AF=0.333	0/0/1	3	0.0962524	0.00152619	C2orf48
2	10307074	G	13	A	7	AF=0.667	0/1/1	3	0.263176	0.00399148	C2orf48
2	10307099	G	13	A	7	AF=0.667	0/1/1	3	0.263176	0.00399148	C2orf48
2	10473362	G	5	A	12	AF=0.333	0/0/1	3	0.143463	0.00288012	HPCAL1
2	10729554	A	14	T	8	AF=0.667	0/1/1	3	0.286279	0.00507046	NOL10
2	10748970	A	17	T	15	AF=0.667	0/1/1	3	0.86005	0.0232719	NOL10
2	10760902	T	9	C	3	AF=0.667	0/1/1	3	0.145996	0.00382585	NOL10
2	11894943	C	3	T	10	AF=0.333	0/0/1	3	0.0922852	0.00163342	LPIN1
2	17846592	A	49	T	61	AF=0.667	0/1/1	3	0.294234	0.0149156	SMC6
2	20817954	T	35	C	40	AF=0.667	0/1/1	3	0.644464	0.0192306	HS1BP3
2	20884262	G	18	A	8	AF=0.667	0/1/1	3	0.0755187	0.000221127	None
2	24224087	C	17	T	16	AF=0.667	0/1/1	3	1	0.0401064	None
2	24225667	A	20	G	17	AF=0.667	0/1/1	3	0.742829	0.0132397	None
2	24323885	A	13	T	16	AF=0.333	0/0/1	3	0.711071	0.017029	FAM228B
2	24431184	C	22	T	32	AF=0.333	0/0/1	3	0.220328	0.000119881	ITSN2
2	26090654	G	14	A	21	AF=0.333	0/0/1	3	0.310505	0.00176138	ASXL2
2	26285102	A	5	G	9	AF=0.333	0/0/1	3	0.42395	0.0207631	RAB10
2	26358110	G	91	C	70	AF=0.333	0/0/1	3	0.114696	0.00733488	RAB10
2	26411674	G	19	A	18	AF=0.667	0/1/1	3	1	0.0234257	GAREML
2	26613329	A	35	G	37	AF=0.667	0/1/1	3	0.906294	0.00818499	EPT1
2	26615902	G	68	A	65	AF=0.333	0/0/1	3	0.862403	0.000212409	EPT1
2	27004234	G	25	A	18	AF=0.667	0/1/1	3	0.360378	0.000973812	None
2	27018869	T	21	C	13	AF=0.667	0/1/1	3	0.229481	0.000791474	CENPA
2	27018889	A	25	T	15	AF=0.667	0/1/1	3	0.15386	0.000167341	CENPA
2	27309883	G	36	A	40	AF=0.333	0/0/1	3	0.731009	0.000570445	KHK
2	27536380	T	35	C	35	AF=0.667	0/1/1	3	1	0.00485121	MPV17
2	27568565	T	13	C	8	AF=0.667	0/1/1	3	0.38331	0.00906972	GTF3C2
2	27589810	T	17	C	12	AF=0.667	0/1/1	3	0.458258	0.00539631	EIF2B4
2	27592423	C	13	T	9	AF=0.667	0/1/1	3	0.523467	0.0208981	EIF2B4
2	27663416	G	13	T	8	AF=0.667	0/1/1	3	0.38331	0.00906972	NRBP1
2	27807414	C	11	G	5	AF=0.667	0/1/1	3	0.210114	0.00553862	ZNF512
2	27839369	T	4	C	12	AF=0.333	0/0/1	3	0.0768127	0.000784383	ZNF512
2	27839539	T	3	C	9	AF=0.333	0/0/1	3	0.145996	0.00382585	ZNF512
2	27874332	A	51	C	58	AF=0.667	0/1/1	3	0.5657	0.00419037	SUPT7L
2	27874563	G	20	T	18	AF=0.667	0/1/1	3	0.871415	0.0152318	SUPT7L
2	29143689	C	3	T	10	AF=0.333	0/0/1	3	0.0922852	0.00163342	WDR43
2	30381901	T	57	C	53	AF=0.333	0/0/1	3	0.775003	0.00157262	YPEL5
2	32257796	G	27	A	19	AF=0.667	0/1/1	3	0.301996	0.000458203	DPY30, MEMO1
2	32263087	C	14	T	5	AF=0.667	0/1/1	3	0.0635681	0.00037634	DPY30, MEMO1
2	32390283	T	32	C	23	AF=0.667	0/1/1	3	0.28061	0.000160643	None
2	32446613	A	12	G	21	AF=0.333	0/0/1	3	0.162756	0.000582829	SLC30A6
2	32581251	G	22	A	10	AF=0.667	0/1/1	3	0.0501025	4.66981e-05	None
2	32656153	C	28	T	22	AF=0.667	0/1/1	3	0.479888	0.00132962	BIRC6
2	33447202	C	22	T	12	AF=0.667	0/1/1	3	0.121449	0.000195692	LTBP1
2	36783127	T	6	C	16	AF=0.333	0/0/1	3	0.0524788	0.000315891	FEZ2
2	37475976	G	47	C	48	AF=0.667	0/1/1	3	1	0.00144026	NDUFAF7
2	37797178	C	12	A	7	AF=0.667	0/1/1	3	0.359283	0.0121329	None
2	37805091	G	16	A	15	AF=0.667	0/1/1	3	1	0.0361149	None
2	37805092	G	16	A	15	AF=0.667	0/1/1	3	1	0.0361149	None
2	39664659	C	8	T	13	AF=0.333	0/0/1	3	0.38331	0.00906972	LOC728730
2	39702584	C	14	T	15	AF=0.333	0/0/1	3	1	0.0471081	LOC728730
2	39712161	C	8	A	5	AF=0.667	0/1/1	3	0.581055	0.0396204	LOC728730
2	39996457	C	17	T	12	AF=0.667	0/1/1	3	0.458258	0.00539631	THUMPD2
2	42512460	A	31	T	31	AF=0.667	0/1/1	3	1	0.00678726	EML4
2	42567290	C	19	T	19	AF=0.333	0/0/1	3	1	0.0376856	None
2	43452618	C	64	T	51	AF=0.333	0/0/1	3	0.263054	0.0133753	ZFP36L2
2	43452793	C	130	G	104	AF=0.333	0/0/1	3	0.101991	0.00039026	ZFP36L2
2	43625184	T	55	A	38	AF=0.667	0/1/1	3	0.0965652	3.96051e-07	THADA
2	44117788	C	16	G	23	AF=0.333	0/0/1	3	0.336784	0.00106729	LRPPRC
2	46986716	C	54	G	50	AF=0.667	0/1/1	3	0.768792	9.97722e-05	SOCS5
2	47709153	G	46	A	40	AF=0.333	0/0/1	3	0.590036	0.0115509	MSH2
2	48010558	C	123	A	113	AF=0.333	0/0/1	3	0.558068	4.3413e-06	MSH6
2	48545582	T	12	G	14	AF=0.333	0/0/1	3	0.845019	0.0357312	FOXN2
2	58387258	A	180	G	164	AF=0.333	0/0/1	3	0.418701	4.32522e-08	FANCL
2	61316509	T	30	C	27	AF=0.333	0/0/1	3	0.791366	0.0338989	KIAA1841
2	61468761	T	89	C	74	AF=0.333	0/0/1	3	0.272784	0.00150638	USP34
2	61647901	A	48	G	51	AF=0.667	0/1/1	3	0.840822	0.001869	USP34
2	61724550	T	5	A	13	AF=0.333	0/0/1	3	0.0962524	0.00152619	XPO1
2	61724568	G	7	A	13	AF=0.333	0/0/1	3	0.263176	0.00399148	XPO1
2	61761774	A	25	G	24	AF=0.333	0/0/1	3	1	0.0230235	XPO1
2	61764098	A	8	C	13	AF=0.333	0/0/1	3	0.38331	0.00906972	XPO1
2	68358341	T	30	C	33	AF=0.333	0/0/1	3	0.801306	0.00192376	WDR92
2	68753240	T	11	A	7	AF=0.667	0/1/1	3	0.480682	0.0211367	APLF
2	69546480	G	5	A	13	AF=0.333	0/0/1	3	0.0962524	0.00152619	None
2	69551052	T	81	C	59	AF=0.333	0/0/1	3	0.0755508	0.0310642	GFPT1
2	69579655	C	2	G	8	AF=0.333	0/0/1	3	0.109375	0.00337964	GFPT1
2	70512175	T	7	A	17	AF=0.333	0/0/1	3	0.0639147	0.000250307	SNRPG
2	70516661	G	8	A	4	AF=0.667	0/1/1	3	0.387695	0.0263932	SNRPG
2	70523972	T	436	A	466	AF=0.667	0/1/1	3	0.33425	1.39059e-20	FAM136A
2	71614454	A	3	G	9	AF=0.333	0/0/1	3	0.145996	0.00382585	ZNF638
2	71615534	C	14	T	6	AF=0.667	0/1/1	3	0.115318	0.00117265	ZNF638
2	71620563	A	35	G	23	AF=0.667	0/1/1	3	0.148006	3.30546e-05	ZNF638
2	71633389	C	127	T	100	AF=0.333	0/0/1	3	0.084179	0.000888561	ZNF638
2	73301687	G	51	A	68	AF=0.333	0/0/1	3	0.142132	1.37909e-07	RAB11FIP5
2	73312572	C	2	T	8	AF=0.333	0/0/1	3	0.109375	0.00337964	RAB11FIP5
2	73477351	T	13	C	11	AF=0.667	0/1/1	3	0.83882	0.048265	CCT7
2	73483186	C	9	G	12	AF=0.333	0/0/1	3	0.663624	0.0339537	FBXO41
2	73685852	G	34	A	42	AF=0.333	0/0/1	3	0.422191	0.000122975	ALMS1
2	73828538	G	26	A	27	AF=0.333	0/0/1	3	1	0.00836215	ALMS1
2	74087290	T	8	C	3	AF=0.667	0/1/1	3	0.226562	0.00876373	STAMBP
2	74091327	T	29	C	30	AF=0.667	0/1/1	3	1	0.0124837	STAMBP
2	74347792	G	13	C	18	AF=0.333	0/0/1	3	0.47313	0.00643971	None
2	74371995	G	3	A	9	AF=0.333	0/0/1	3	0.145996	0.00382585	BOLA3
2	74375457	G	100	A	76	AF=0.333	0/0/1	3	0.0826803	0.00644262	BOLA3-AS1
2	74699778	C	208	A	196	AF=0.667	0/1/1	3	0.584248	7.17353e-14	CCDC142, MRPL53
2	75923413	T	81	C	105	AF=0.667	0/1/1	3	0.0914422	0.00388414	GCFC2
2	84662986	G	4	A	10	AF=0.333	0/0/1	3	0.179565	0.00400617	SUCLG1
2	86315590	A	6	G	10	AF=0.333	0/0/1	3	0.454498	0.0173614	POLR1A
2	87002706	G	45	A	63	AF=0.333	0/0/1	3	0.101433	1.06615e-07	RMND5A
2	87003846	C	49	A	41	AF=0.667	0/1/1	3	0.460792	4.34956e-05	RMND5A
2	91816473	C	9	T	19	AF=0.333	0/0/1	3	0.0871586	0.000206176	LOC654342
2	96941467	G	5	A	14	AF=0.333	0/0/1	3	0.0635681	0.00037634	SNRNP200
2	97030247	T	236	C	205	AF=0.333	0/0/1	3	0.153047	1.22628e-08	NCAPH
2	97035737	G	13	A	7	AF=0.667	0/1/1	3	0.263176	0.00399148	NCAPH
2	97390953	C	11	T	6	AF=0.667	0/1/1	3	0.332306	0.00896458	LMAN2L
2	97398884	A	3	G	11	AF=0.333	0/0/1	3	0.057373	0.000684325	LMAN2L
2	97500775	A	21	G	13	AF=0.667	0/1/1	3	0.229481	0.000791474	CNNM3
2	99220707	T	48	C	51	AF=0.333	0/0/1	3	0.840822	0.000242873	COA5
2	99233894	T	17	C	23	AF=0.333	0/0/1	3	0.429591	0.00208089	UNC50
2	100893113	C	28	A	28	AF=0.333	0/0/1	3	1	0.0103217	LONRF2
2	100894802	C	49	G	44	AF=0.333	0/0/1	3	0.678532	0.00566911	LONRF2
2	100897573	G	3	A	11	AF=0.333	0/0/1	3	0.057373	0.000684325	LONRF2
2	101009600	G	92	A	73	AF=0.333	0/0/1	3	0.160922	0.00371927	CHST10
2	101623745	T	22	A	10	AF=0.667	0/1/1	3	0.0501025	4.66981e-05	RPL31, TBC1D8
2	102793533	C	5	G	11	AF=0.333	0/0/1	3	0.210114	0.00553862	IL1R1
2	105882683	C	47	T	61	AF=0.333	0/0/1	3	0.210766	9.81679e-07	LOC644617
2	105882761	G	40	A	48	AF=0.333	0/0/1	3	0.455741	5.69123e-05	None
2	105889349	G	116	A	112	AF=0.667	0/1/1	3	0.842568	4.64909e-08	TGFBRAP1
2	105915128	G	46	A	55	AF=0.333	0/0/1	3	0.42616	1.75503e-05	TGFBRAP1
2	105924510	A	31	G	35	AF=0.333	0/0/1	3	0.712231	0.00099449	TGFBRAP1
2	106378613	A	12	C	6	AF=0.667	0/1/1	3	0.237885	0.00456538	NCK2
2	109301074	C	42	A	39	AF=0.667	0/1/1	3	0.824313	0.000579142	LIMS1
2	111396257	G	7	C	13	AF=0.333	0/0/1	3	0.263176	0.00399148	BUB1
2	111409331	T	10	G	22	AF=0.333	0/0/1	3	0.0501025	4.66981e-05	BUB1
2	111923629	A	19	T	29	AF=0.333	0/0/1	3	0.193413	0.000159683	BCL2L11
2	111995287	A	8	T	19	AF=0.333	0/0/1	3	0.052239	0.000108734	LOC541471
2	112641909	C	7	T	13	AF=0.333	0/0/1	3	0.263176	0.00399148	None
2	113417579	G	23	A	11	AF=0.667	0/1/1	3	0.0576127	6.31532e-05	SLC20A1
2	113494250	T	41	C	35	AF=0.667	0/1/1	3	0.566573	0.000223293	NT5DC4
2	113494520	T	22	C	20	AF=0.667	0/1/1	3	0.877614	0.0130199	NT5DC4
2	113497295	A	15	G	8	AF=0.667	0/1/1	3	0.21004	0.00285358	CKAP2L, NT5DC4
2	113946196	G	11	C	5	AF=0.667	0/1/1	3	0.210114	0.00553862	PSD4
2	113996888	A	106	G	104	AF=0.667	0/1/1	3	0.945006	3.29265e-07	LOC654433, PAX8
2	114017029	A	31	G	24	AF=0.667	0/1/1	3	0.418754	0.000490764	LOC654433, PAX8
2	114462814	G	23	A	20	AF=0.667	0/1/1	3	0.760792	0.00866469	None
2	114462957	C	35	T	21	AF=0.667	0/1/1	3	0.0814268	1.11247e-05	None
2	114465942	G	63	A	48	AF=0.333	0/0/1	3	0.183657	0.0338709	None
2	114492135	C	11	T	7	AF=0.667	0/1/1	3	0.480682	0.0211367	SLC35F5
2	114661658	C	9	G	14	AF=0.333	0/0/1	3	0.404873	0.00725583	ACTR3
2	118588622	C	215	T	188	AF=0.667	0/1/1	3	0.195205	1.46114e-16	DDX18
2	118588713	C	248	T	283	AF=0.667	0/1/1	3	0.140012	1.63262e-10	DDX18
2	118589911	A	24	G	25	AF=0.667	0/1/1	3	1	0.0230235	DDX18
2	118596118	G	7	C	3	AF=0.667	0/1/1	3	0.34375	0.0195481	None
2	122515214	G	21	T	16	AF=0.667	0/1/1	3	0.511376	0.0044591	TSN
2	127056637	G	7	T	3	AF=0.667	0/1/1	3	0.34375	0.0195481	None
2	127443958	T	12	G	10	AF=0.667	0/1/1	3	0.831812	0.0418515	GYPC
2	128040915	T	8	C	3	AF=0.667	0/1/1	3	0.226562	0.00876373	ERCC3
2	128061053	A	22	G	20	AF=0.667	0/1/1	3	0.877614	0.0130199	MAP3K2
2	128062048	T	19	C	16	AF=0.667	0/1/1	3	0.735879	0.0113954	MAP3K2
2	128063945	T	16	C	9	AF=0.667	0/1/1	3	0.229523	0.00217053	MAP3K2
2	128622491	G	76	A	86	AF=0.333	0/0/1	3	0.479615	2.52691e-07	AMMECR1L
2	128934400	T	139	C	126	AF=0.333	0/0/1	3	0.461094	1.67446e-06	UGGT1
2	128949893	A	42	G	37	AF=0.333	0/0/1	3	0.652964	0.0122078	UGGT1
2	130940090	G	15	T	18	AF=0.333	0/0/1	3	0.728332	0.0149103	MZT2B, SMPD4
2	131123264	A	17	G	16	AF=0.667	0/1/1	3	1	0.0401064	PTPN18
2	131124127	T	20	G	17	AF=0.667	0/1/1	3	0.742829	0.0132397	PTPN18
2	131805577	T	51	C	58	AF=0.667	0/1/1	3	0.5657	0.00419037	FAM168B
2	131809436	A	191	T	196	AF=0.333	0/0/1	3	0.838909	2.08561e-12	FAM168B
2	132062612	G	15	A	6	AF=0.667	0/1/1	3	0.0783539	0.000602161	PLEKHB2
2	132244812	G	14	T	10	AF=0.667	0/1/1	3	0.541256	0.0151579	MZT2A
2	132348654	C	3	T	7	AF=0.333	0/0/1	3	0.34375	0.0195481	None
2	132348661	C	7	T	3	AF=0.667	0/1/1	3	0.34375	0.0195481	None
2	132384339	C	13	T	7	AF=0.667	0/1/1	3	0.263176	0.00399148	None
2	132400482	A	5	C	11	AF=0.333	0/0/1	3	0.210114	0.00553862	None
2	158160554	A	26	G	37	AF=0.25	0/0/0/1	4	0.207368	1.37538e-08	GALNT5
2	170558231	T	39	C	48	AF=0.75	0/1/1/1	4	0.391191	5.7241e-05	PHOSPHO2-KLHL23
2	170806324	C	43	G	40	AF=0.25	0/0/0/1	4	0.826405	5.39686e-06	UBR3
3	183897884	G	3	A	7	AF=0.333	0/0/1	3	0.34375	0.0195481	AP2M1
3	195422600	G	44	A	41	AF=0.333	0/0/1	3	0.828423	0.00538078	None
3	195423645	C	31	T	36	AF=0.667	0/0/1	3	0.625407	0.0275422	None
3	195423926	G	43	A	28	AF=0.667	0/0/1	3	0.0959236	3.19966e-06	None
3	195423970	G	20	C	11	AF=0.667	0/0/1	3	0.149613	0.000427488	None
3	195425765	G	47	C	42	AF=0.333	0/0/1	3	0.671809	0.00676732	None
3	195426490	A	67	G	57	AF=0.667	0/0/1	3	0.419074	2.21997e-06	None
3	195435511	T	13	G	25	AF=0.333	0/0/1	3	0.0729514	4.66306e-05	AK128346, BC144457
4	42329	C	4	T	11	AF=0.333	0/0/1	3	0.118469	0.0017905	None
4	50706	C	6	G	14	AF=0.333	0/0/1	3	0.115318	0.00117265	None
4	56791	T	79	C	72	AF=0.333	0/0/1	3	0.625504	0.000265012	ZNF595, ZNF718
4	59299	C	28	G	30	AF=0.333	0/0/1	3	0.895683	0.00481898	ZNF595, ZNF718
4	60210	G	355	A	408	AF=0.333	0/0/1	3	0.0596936	2.93987e-30	ZNF595, ZNF718
4	433851	C	13	A	8	AF=0.667	0/0/1	3	0.38331	0.00906972	ABCA11P, ZNF721
4	516041	C	24	A	13	AF=0.667	0/0/1	3	0.0988717	0.000142636	PIGG
4	525878	C	18	G	31	AF=0.333	0/0/1	3	0.0854331	2.33139e-05	PIGG
4	667076	C	27	G	30	AF=0.333	0/0/1	3	0.791366	0.00288378	ATP5I
4	762963	A	52	G	57	AF=0.667	0/0/1	3	0.701811	0.00213983	DKFZp547K2416, PCGF3
4	766838	C	25	G	21	AF=0.667	0/0/1	3	0.658738	0.00425429	None
4	766845	C	25	G	20	AF=0.667	0/0/1	3	0.551484	0.00234954	None
4	775515	G	89	T	94	AF=0.667	0/0/1	3	0.767563	1.96955e-05	LOC100129917
4	858941	T	142	C	110	AF=0.667	0/0/1	3	0.0506255	6.79112e-14	GAK
4	888361	C	16	A	13	AF=0.667	0/0/1	3	0.711071	0.017029	GAK
4	956364	G	66	C	61	AF=0.667	0/0/1	3	0.722787	1.7832e-05	DGKQ
4	994692	C	15	T	21	AF=0.333	0/0/1	3	0.405032	0.0022714	IDUA
4	1207881	T	16	C	15	AF=0.667	0/0/1	3	1	0.0361149	CTBP1, HV535469, HV535487
4	1236562	C	48	G	61	AF=0.667	0/0/1	3	0.250282	0.019398	CTBP1
4	1237968	T	27	C	27	AF=0.667	0/0/1	3	1	0.0132967	CTBP1
4	1238859	G	54	A	73	AF=0.667	0/0/1	3	0.10985	0.0303044	CTBP1
4	1243617	T	48	C	35	AF=0.667	0/0/1	3	0.18746	6.02213e-06	C4orf42, CTBP1-AS1
4	1243877	C	15	T	14	AF=0.667	0/0/1	3	1	0.0471081	C4orf42, CTBP1-AS1
4	1244267	A	40	G	33	AF=0.667	0/0/1	3	0.482789	0.000165141	C4orf42, CTBP1-AS1
4	1245277	T	29	G	24	AF=0.667	0/0/1	3	0.583132	0.00186566	C4orf42, CTBP1-AS1
4	1374695	C	42	A	34	AF=0.667	0/0/1	3	0.422191	0.000122975	UVSSA
4	1374774	C	25	T	16	AF=0.667	0/0/1	3	0.211024	0.000354031	UVSSA
4	1377615	A	38	G	23	AF=0.667	0/0/1	3	0.0721774	4.08015e-06	UVSSA
4	1378104	G	23	A	16	AF=0.667	0/0/1	3	0.336784	0.00106729	UVSSA
4	1378196	T	16	G	24	AF=0.333	0/0/1	3	0.268187	0.000614198	UVSSA
4	1387780	A	15	G	14	AF=0.667	0/0/1	3	1	0.0471081	CRIPAK
4	1719817	A	56	G	50	AF=0.333	0/0/1	3	0.627431	0.00367645	TMEM129
4	1732230	T	47	C	39	AF=0.333	0/0/1	3	0.450548	0.0217035	TACC3
4	1736544	C	12	T	24	AF=0.333	0/0/1	3	0.0652453	5.25019e-05	TACC3
4	1740675	G	67	A	58	AF=0.667	0/0/1	3	0.474422	3.75806e-06	TACC3
4	2839659	G	15	A	28	AF=0.333	0/0/1	3	0.065994	2.65437e-05	SH3BP2
4	2908955	G	14	C	21	AF=0.333	0/0/1	3	0.310505	0.00176138	ADD1
4	2943361	T	123	C	128	AF=0.333	0/0/1	3	0.800733	8.57361e-09	AB000466, NOP14, NOP14-AS1
4	2946481	A	3	G	9	AF=0.333	0/0/1	3	0.145996	0.00382585	NOP14, NOP14-AS1
4	4553346	A	17	G	11	AF=0.667	0/0/1	3	0.344928	0.00397389	LOC100507266
4	4553570	C	17	T	9	AF=0.667	0/0/1	3	0.168638	0.00118986	LOC100507266
4	4553642	T	16	C	8	AF=0.667	0/0/1	3	0.15159	0.000908996	LOC100507266
4	6676485	G	130	A	159	AF=0.667	0/0/1	3	0.0993787	4.55649e-05	LOC93622
4	8436286	T	16	C	14	AF=0.667	0/0/1	3	0.855536	0.0309569	ACOX3
4	8472839	C	48	T	54	AF=0.667	0/0/1	3	0.620768	0.00434725	TRMT44
4	10081052	C	9	T	5	AF=0.667	0/0/1	3	0.42395	0.0207631	WDR1
4	10082772	T	19	C	15	AF=0.667	0/0/1	3	0.607591	0.00954535	WDR1
4	10098192	G	5	A	8	AF=0.333	0/0/1	3	0.581055	0.0396204	WDR1
4	10442700	C	49	T	41	AF=0.333	0/0/1	3	0.460792	0.0182782	ZNF518B
4	10443384	T	151	G	180	AF=0.667	0/0/1	3	0.12367	3.63084e-06	ZNF518B
4	10444650	C	94	T	119	AF=0.667	0/0/1	3	0.0998562	0.0010343	ZNF518B
4	15610771	G	17	A	14	AF=0.667	0/0/1	3	0.7201	0.0203061	FBXL5
4	15679852	A	14	T	16	AF=0.333	0/0/1	3	0.855536	0.0309569	None
4	15682585	T	3	C	8	AF=0.333	0/0/1	3	0.226562	0.00876373	None
4	15689632	G	33	A	42	AF=0.333	0/0/1	3	0.355699	6.56117e-05	BC017971, FAM200B
4	17486468	A	4	T	9	AF=0.333	0/0/1	3	0.266846	0.0139305	QDPR
4	17486739	G	21	C	26	AF=0.333	0/0/1	3	0.560065	0.0027818	QDPR
4	17490340	T	13	G	16	AF=0.333	0/0/1	3	0.711071	0.017029	QDPR
4	17810255	G	25	A	30	AF=0.333	0/0/1	3	0.590053	0.00140704	DCAF16
4	17854588	T	2	A	8	AF=0.333	0/0/1	3	0.109375	0.00337964	LCORL
4	17874089	C	24	T	25	AF=0.333	0/0/1	3	1	0.0142623	LCORL
4	17884769	G	20	A	30	AF=0.333	0/0/1	3	0.202639	0.000125428	LCORL
4	20711031	T	5	C	8	AF=0.333	0/0/1	3	0.581055	0.0396204	PACRGL
4	20714924	A	6	G	11	AF=0.333	0/0/1	3	0.332306	0.00896458	PACRGL
4	20733049	G	18	C	20	AF=0.333	0/0/1	3	0.871415	0.0152318	KCNIP4, PACRGL
4	20735769	G	5	T	13	AF=0.333	0/0/1	3	0.0962524	0.00152619	KCNIP4, PACRGL
4	20739905	G	8	A	12	AF=0.333	0/0/1	3	0.503445	0.0161994	KCNIP4, PACRGL
4	20753934	A	11	G	13	AF=0.333	0/0/1	3	0.83882	0.048265	KCNIP4, PACRGL
4	22820504	A	12	T	7	AF=0.667	0/0/1	3	0.359283	0.0121329	GBA3
4	25235801	G	41	A	41	AF=0.667	0/0/1	3	1	0.00210664	PI4K2B
4	25417109	T	91	A	111	AF=0.667	0/0/1	3	0.181135	0.000563031	ANAPC4
4	26429328	G	11	T	7	AF=0.667	0/0/1	3	0.480682	0.0211367	RBPJ
4	39124750	C	7	A	13	AF=0.333	0/0/1	3	0.263176	0.00399148	KLHL5
4	39275394	T	32	C	27	AF=0.667	0/0/1	3	0.602923	0.00125075	WDR19
4	39289473	A	68	G	77	AF=0.667	0/0/1	3	0.506596	0.000757945	RFC1
4	39457153	C	22	T	36	AF=0.333	0/0/1	3	0.0869489	8.795e-06	RPL9
4	39459154	G	25	A	24	AF=0.333	0/0/1	3	1	0.0230235	RPL9
4	39469845	A	27	T	29	AF=0.333	0/0/1	3	0.893853	0.0043861	LIAS
4	39470025	C	19	T	18	AF=0.667	0/0/1	3	1	0.0234257	LIAS
4	39754970	G	12	C	18	AF=0.333	0/0/1	3	0.361595	0.0030856	UBE2K
4	39830157	C	18	T	18	AF=0.333	0/0/1	3	1	0.0497778	PDS5A
4	39921942	A	94	G	91	AF=0.333	0/0/1	3	0.88315	1.03556e-05	PDS5A
4	40438576	A	20	G	10	AF=0.667	0/0/1	3	0.0987371	0.000275375	RBM47
4	40440215	T	17	C	17	AF=0.667	0/0/1	3	1	0.0453482	RBM47
4	46042083	G	7	A	10	AF=0.333	0/0/1	3	0.629059	0.0368036	GABRG1
4	47843116	A	11	G	23	AF=0.333	0/0/1	3	0.0576127	6.31532e-05	None
4	48834896	C	19	G	13	AF=0.667	0/0/1	3	0.377086	0.00397833	OCIAD1
4	48851937	C	7	T	12	AF=0.333	0/0/1	3	0.359283	0.0121329	OCIAD1
4	48854139	T	30	C	20	AF=0.667	0/0/1	3	0.202639	0.000125428	OCIAD1
4	52752812	A	14	T	21	AF=0.333	0/0/1	3	0.310505	0.00176138	DCUN1D4
4	53587371	T	19	C	10	AF=0.667	0/0/1	3	0.136046	0.000510205	None
4	56266882	A	34	C	34	AF=0.333	0/0/1	3	1	0.00448388	TMEM165
4	56289778	C	3	T	10	AF=0.333	0/0/1	3	0.0922852	0.00163342	TMEM165
4	56289779	A	3	G	10	AF=0.333	0/0/1	3	0.0922852	0.00163342	TMEM165
4	56290220	A	16	G	19	AF=0.333	0/0/1	3	0.735879	0.0113954	TMEM165
4	56815145	T	47	C	46	AF=0.667	0/0/1	3	1	0.000602443	CEP135
4	56864032	A	6	G	12	AF=0.333	0/0/1	3	0.237885	0.00456538	CEP135
4	57310924	T	14	C	12	AF=0.667	0/0/1	3	0.845019	0.0357312	PAICS
4	68297913	C	14	A	6	AF=0.667	0/0/1	3	0.115318	0.00117265	AK093203
4	68337045	G	4	C	12	AF=0.333	0/0/1	3	0.0768127	0.000784383	None
4	68480525	C	45	T	39	AF=0.667	0/0/1	3	0.585647	0.000169849	None
4	68518208	A	14	G	6	AF=0.667	0/0/1	3	0.115318	0.00117265	UBA6
4	68534392	C	125	T	122	AF=0.667	0/0/1	3	0.898771	2.22748e-08	UBA6
4	68672416	G	13	A	9	AF=0.667	0/0/1	3	0.523467	0.0208981	LOC550112
4	73307501	C	11	T	13	AF=0.333	0/0/1	3	0.83882	0.048265	ADAMTS3
4	73307597	C	15	T	6	AF=0.667	0/0/1	3	0.0783539	0.000602161	ADAMTS3
4	73956736	G	108	A	97	AF=0.333	0/0/1	3	0.485	4.03619e-05	ANKRD17
4	76872306	T	18	C	8	AF=0.667	0/0/1	3	0.0755187	0.000221127	SDAD1
4	76878688	G	104	A	113	AF=0.333	0/0/1	3	0.58718	1.31666e-08	SDAD1
4	77053834	T	148	C	129	AF=0.667	0/0/1	3	0.279444	6.85578e-12	NUP54
4	77056904	G	9	A	16	AF=0.333	0/0/1	3	0.229523	0.00217053	NUP54
4	77082611	T	20	C	18	AF=0.667	0/0/1	3	0.871415	0.0152318	SCARB2
4	77192838	A	9	C	14	AF=0.333	0/0/1	3	0.404873	0.00725583	FAM47E, FAM47E-STBD1
4	77868466	T	17	C	31	AF=0.333	0/0/1	3	0.0594634	1.02918e-05	None
4	79789729	C	19	T	15	AF=0.667	0/0/1	3	0.607591	0.00954535	BMP2K
4	80149642	G	7	A	3	AF=0.667	0/0/1	3	0.34375	0.0195481	LOC100505875
4	80897999	C	5	G	11	AF=0.333	0/0/1	3	0.210114	0.00553862	ANTXR2
4	80905990	C	138	G	118	AF=0.333	0/0/1	3	0.234969	2.63373e-05	ANTXR2
4	83282421	G	10	C	17	AF=0.333	0/0/1	3	0.247789	0.00177901	HNRNPD
4	83344850	T	128	A	161	AF=0.667	0/0/1	3	0.0596005	0.000103636	HNRPDL
4	83816232	A	45	T	28	AF=0.667	0/0/1	3	0.06037	1.13192e-06	AK128593, SEC31A, THAP9-AS1
4	83816630	C	56	T	49	AF=0.333	0/0/1	3	0.558394	0.0049515	AK128593, SEC31A, THAP9-AS1
4	83848696	C	45	T	39	AF=0.667	0/0/1	3	0.585647	0.000169849	LIN54
4	84204591	A	22	T	17	AF=0.667	0/0/1	3	0.522397	0.00340216	COQ2
4	84374480	C	18	T	12	AF=0.667	0/0/1	3	0.361595	0.0030856	HELQ
4	84382552	A	98	T	108	AF=0.667	0/0/1	3	0.530722	2.26318e-05	FAM175A, MRPS18C
4	84385456	C	11	T	8	AF=0.667	0/0/1	3	0.647606	0.0286644	FAM175A
4	84386084	T	19	A	13	AF=0.667	0/0/1	3	0.377086	0.00397833	FAM175A
4	84526275	T	44	C	36	AF=0.333	0/0/1	3	0.434042	0.0321947	AGPAT9
4	87876388	C	3	A	10	AF=0.333	0/0/1	3	0.0922852	0.00163342	AFF1
4	87876408	T	10	C	5	AF=0.667	0/0/1	3	0.301758	0.0107384	AFF1
4	88059415	G	80	A	102	AF=0.667	0/0/1	3	0.119319	0.00275466	AFF1
4	100799961	T	12	C	18	AF=0.333	0/0/1	3	0.361595	0.0030856	LAMTOR3
4	103183531	T	84	C	71	AF=0.667	0/0/1	3	0.335135	1.25461e-07	SLC39A8
4	103228734	C	25	T	20	AF=0.667	0/0/1	3	0.551484	0.00234954	SLC39A8
4	107246190	G	269	C	245	AF=0.333	0/0/1	3	0.310349	2.1138e-11	AIMP1
4	113510585	G	20	C	17	AF=0.667	0/0/1	3	0.742829	0.0132397	C4orf21
4	113578609	C	51	T	55	AF=0.667	0/0/1	3	0.770919	0.00184409	LARP7
4	119634130	T	24	C	22	AF=0.667	0/0/1	3	0.882996	0.0113018	None
4	120424087	T	5	C	14	AF=0.333	0/0/1	3	0.0635681	0.00037634	PDE5A
4	123274111	A	51	G	55	AF=0.333	0/0/1	3	0.770919	0.000112732	KIAA1109
4	127696014	T	16	G	24	AF=0.333	0/0/1	3	0.268187	0.000614198	None
4	127701509	T	7	C	12	AF=0.333	0/0/1	3	0.359283	0.0121329	None
4	127701510	A	7	C	12	AF=0.333	0/0/1	3	0.359283	0.0121329	None
4	128565000	A	10	G	7	AF=0.667	0/0/1	3	0.629059	0.0368036	INTU
4	128584580	G	8	A	5	AF=0.667	0/0/1	3	0.581055	0.0396204	INTU
4	140228468	T	13	G	5	AF=0.667	0/0/1	3	0.0962524	0.00152619	NAA15
4	141473235	G	14	A	7	AF=0.667	0/0/1	3	0.189247	0.00201017	ELMOD2
4	142240455	A	12	G	6	AF=0.667	0/0/1	3	0.237885	0.00456538	None
4	142243168	C	57	G	72	AF=0.667	0/0/1	3	0.217561	0.0113503	AK124399
4	145916518	T	51	A	60	AF=0.333	0/0/1	3	0.447806	7.23765e-06	ANAPC10
4	147443674	T	18	G	10	AF=0.667	0/0/1	3	0.184933	0.000952335	None
4	154513722	C	6	T	11	AF=0.333	0/0/1	3	0.332306	0.00896458	KIAA0922
4	159149879	G	10	T	5	AF=0.667	0/0/1	3	0.301758	0.0107384	TMEM144
4	159190228	A	6	T	13	AF=0.333	0/0/1	3	0.167068	0.00231089	None
4	159190290	C	6	T	13	AF=0.333	0/0/1	3	0.167068	0.00231089	None
4	164437245	C	23	A	11	AF=0.667	0/0/1	3	0.0576127	6.31532e-05	TMA16
4	164446283	T	31	A	17	AF=0.667	0/0/1	3	0.0594634	1.02918e-05	42795
4	164447271	T	11	C	5	AF=0.667	0/0/1	3	0.210114	0.00553862	42795
4	174089635	A	25	C	26	AF=0.667	0/0/1	3	1	0.0247027	BC040577
4	175241128	A	102	T	92	AF=0.333	0/0/1	3	0.51828	4.87576e-05	CEP44
4	177242959	C	20	T	31	AF=0.333	0/0/1	3	0.16078	7.27622e-05	SPCS3
4	177244885	T	7	C	11	AF=0.333	0/0/1	3	0.480682	0.0211367	SPCS3
4	183811670	T	306	C	277	AF=0.333	0/0/1	3	0.246172	1.40903e-12	DCTD
4	183872488	T	4	G	9	AF=0.333	0/0/1	3	0.266846	0.0139305	None
4	184237800	A	69	G	70	AF=0.333	0/0/1	3	1	4.251e-05	WWC2
4	184238670	C	39	G	34	AF=0.667	0/0/1	3	0.639973	0.000436349	WWC2
4	187116227	G	15	A	11	AF=0.667	0/0/1	3	0.557197	0.0116391	CYP4V2
4	187133031	A	14	T	6	AF=0.667	0/0/1	3	0.115318	0.00117265	CYP4V2
4	187335534	A	17	G	13	AF=0.667	0/0/1	3	0.584665	0.0104754	LOC285441
4	187336382	C	10	A	20	AF=0.333	0/0/1	3	0.0987371	0.000275375	LOC285441
4	187347954	T	98	C	79	AF=0.333	0/0/1	3	0.175899	0.00180322	LOC285441
4	187416939	C	12	T	9	AF=0.667	0/0/1	3	0.663624	0.0339537	LOC285441
4	187524859	T	31	C	26	AF=0.667	0/0/1	3	0.596642	0.0011016	FAT1
5	460119	C	7	T	10	AF=0.25	0/0/1	4	0.629059	0.00310078	EXOC3
5	10282396	A	418	G	457	AF=0.75	0/0/1	4	0.198892	1.08803e-47	CMBL
5	33460425	A	31	G	38	AF=0.25	0/0/1	4	0.470369	1.52771e-07	TARS
5	33461355	G	1015	A	1009	AF=0.25	0/0/1	4	0.91151	3.05767e-127	TARS
5	52856504	G	68	C	92	AF=0.667	0/0/1	3	0.0686823	0.0149696	NDUFS4
5	53672956	G	8	C	11	AF=0.333	0/0/1	3	0.647606	0.0286644	None
5	53708204	T	62	A	66	AF=0.333	0/0/1	3	0.791007	2.07804e-05	None
5	54001926	G	7	T	3	AF=0.667	0/0/1	3	0.34375	0.0195481	None
5	54001948	A	7	T	3	AF=0.667	0/0/1	3	0.34375	0.0195481	None
5	54629979	A	8	G	3	AF=0.667	0/0/1	3	0.226562	0.00876373	SKIV2L2
5	55404928	C	10	A	13	AF=0.333	0/0/1	3	0.677639	0.0252846	ANKRD55
5	59886902	T	9	A	18	AF=0.333	0/0/1	3	0.122078	0.000659675	None
5	61694096	A	13	G	15	AF=0.333	0/0/1	3	0.850554	0.0275116	DIMT1
5	68425699	A	52	G	57	AF=0.333	0/0/1	3	0.701811	5.90594e-05	SLC30A5
5	68464544	A	11	G	17	AF=0.333	0/0/1	3	0.344928	0.00397389	CCNB1
5	68499499	G	16	T	17	AF=0.333	0/0/1	3	1	0.0401064	CENPH
5	68513599	G	49	T	36	AF=0.667	0/0/1	3	0.19276	4.7093e-06	MRPS36
5	71403306	T	13	A	24	AF=0.333	0/0/1	3	0.0988717	0.000142636	MAP1B
5	72851535	A	8	T	17	AF=0.333	0/0/1	3	0.107752	0.000449631	ANKRA2
5	72876776	C	21	A	25	AF=0.333	0/0/1	3	0.658738	0.00425429	UTP15
5	72879084	T	3	C	7	AF=0.333	0/0/1	3	0.34375	0.0195481	None
5	74681773	T	31	C	41	AF=0.333	0/0/1	3	0.288784	4.53654e-05	COL4A3BP
5	74883486	C	12	T	14	AF=0.333	0/0/1	3	0.845019	0.0357312	POLK
5	74999576	G	3	A	10	AF=0.333	0/0/1	3	0.0922852	0.00163342	POC5
5	77651924	T	26	C	23	AF=0.333	0/0/1	3	0.77545	0.0487661	None
5	77652197	G	10	T	7	AF=0.667	0/0/1	3	0.629059	0.0368036	None
5	77656078	A	53	G	61	AF=0.667	0/0/1	3	0.512255	0.00378011	BC039455
5	78181477	C	27	T	28	AF=0.333	0/0/1	3	1	0.00925354	ARSB
5	78670802	A	28	G	28	AF=0.333	0/0/1	3	1	0.0103217	HOMER1
5	78959382	T	4	C	12	AF=0.333	0/0/1	3	0.0768127	0.000784383	PAPD4
5	78983378	A	4	G	12	AF=0.333	0/0/1	3	0.0768127	0.000784383	None
5	79437439	C	13	T	5	AF=0.667	0/0/1	3	0.0962524	0.00152619	SERINC5
5	79925610	C	14	A	23	AF=0.333	0/0/1	3	0.187742	0.000361318	DHFR
5	79929174	T	8	G	14	AF=0.333	0/0/1	3	0.286279	0.00507046	DHFR
5	80534416	T	31	G	40	AF=0.333	0/0/1	3	0.342471	7.34137e-05	CKMT2, LOC100131067, RNU5E-1
5	80716163	T	86	G	74	AF=0.333	0/0/1	3	0.384567	0.000743621	RNU5E-1, SSBP2
5	81551027	C	13	A	15	AF=0.333	0/0/1	3	0.850554	0.0275116	ATG10
5	81571846	G	32	A	31	AF=0.333	0/0/1	3	1	0.0104841	RPS23
5	81572464	G	35	C	48	AF=0.333	0/0/1	3	0.18746	6.02213e-06	RPS23
5	81574182	C	266	T	245	AF=0.667	0/0/1	3	0.37631	3.20405e-18	RPS23
5	81574925	G	13	A	15	AF=0.333	0/0/1	3	0.850554	0.0275116	None
5	82349377	A	105	G	112	AF=0.667	0/0/1	3	0.683879	4.80083e-06	TMEM167A
5	85650406	C	18	A	12	AF=0.667	0/0/1	3	0.361595	0.0030856	None
5	86677755	T	16	A	7	AF=0.667	0/0/1	3	0.0931396	0.000499885	RASA1
5	87572026	A	39	G	32	AF=0.333	0/0/1	3	0.476688	0.0432496	TMEM161B-AS1
5	87581588	A	138	C	117	AF=0.333	0/0/1	3	0.210322	3.43855e-05	TMEM161B-AS1
5	89802004	G	5	C	9	AF=0.333	0/0/1	3	0.42395	0.0207631	POLR3G
5	89812676	T	32	A	28	AF=0.333	0/0/1	3	0.698883	0.0388024	LYSMD3
5	94988094	C	10	T	22	AF=0.333	0/0/1	3	0.0501025	4.66981e-05	RFESD, SPATA9
5	94993788	A	13	G	18	AF=0.333	0/0/1	3	0.47313	0.00643971	SPATA9
5	95071832	A	19	G	8	AF=0.667	0/0/1	3	0.052239	0.000108734	RHOBTB3
5	95100351	A	2	G	8	AF=0.333	0/0/1	3	0.109375	0.00337964	RHOBTB3
5	95124328	T	6	G	11	AF=0.333	0/0/1	3	0.332306	0.00896458	RHOBTB3
5	95127467	G	12	C	20	AF=0.333	0/0/1	3	0.215327	0.00100806	RHOBTB3
5	95236415	G	41	A	54	AF=0.667	0/0/1	3	0.218054	0.0495175	ELL2
5	96109935	T	80	G	95	AF=0.667	0/0/1	3	0.289893	0.000711729	CAST, ERAP1
5	96139250	C	59	G	75	AF=0.667	0/0/1	3	0.194857	0.0101002	ERAP1
5	96496189	A	8	C	13	AF=0.333	0/0/1	3	0.38331	0.00906972	None
5	98202363	G	14	T	15	AF=0.333	0/0/1	3	1	0.0471081	CHD1
5	102466872	C	10	T	16	AF=0.333	0/0/1	3	0.32694	0.00330628	PPIP5K2
5	107196976	G	18	A	14	AF=0.667	0/0/1	3	0.596615	0.00810101	FBXL17
5	108528729	A	10	G	18	AF=0.333	0/0/1	3	0.184933	0.000952335	AK021888
5	109203042	G	120	A	91	AF=0.667	0/0/1	3	0.0536469	2.4867e-12	MAN2A1
5	110100669	T	34	G	38	AF=0.333	0/0/1	3	0.723948	0.00067119	None
5	112174762	G	28	A	24	AF=0.667	0/0/1	3	0.677809	0.0028388	APC
5	112176756	T	30	A	30	AF=0.333	0/0/1	3	1	0.00868269	APC
5	112201054	A	20	G	21	AF=0.333	0/0/1	3	1	0.019551	SRP19
5	112204207	C	10	T	22	AF=0.333	0/0/1	3	0.0501025	4.66981e-05	SRP19
5	112205207	G	13	C	16	AF=0.333	0/0/1	3	0.711071	0.017029	SRP19
5	112223601	A	10	C	6	AF=0.667	0/0/1	3	0.454498	0.0173614	REEP5, SRP19
5	112257908	T	198	C	228	AF=0.667	0/0/1	3	0.159926	1.76192e-08	REEP5
5	112349297	T	21	C	30	AF=0.333	0/0/1	3	0.262438	0.000260205	DCP2
5	114919459	A	13	C	15	AF=0.333	0/0/1	3	0.850554	0.0275116	TICAM2, TMED7-TICAM2
5	114951553	A	66	G	64	AF=0.333	0/0/1	3	0.930155	0.0001792	TMED7, TMED7-TICAM2
5	115166713	C	58	T	52	AF=0.333	0/0/1	3	0.633756	0.00234797	ATG12
5	115169920	G	6	A	11	AF=0.333	0/0/1	3	0.332306	0.00896458	ATG12
5	115469773	C	104	T	86	AF=0.667	0/0/1	3	0.217356	1.63356e-09	COMMD10
5	118175020	A	11	G	7	AF=0.667	0/0/1	3	0.480682	0.0211367	DTWD2
5	118728953	G	84	C	91	AF=0.667	0/0/1	3	0.650272	7.45252e-05	TNFAIP8
5	121366191	G	5	A	14	AF=0.333	0/0/1	3	0.0635681	0.00037634	None
5	121366608	A	44	G	43	AF=0.333	0/0/1	3	1	0.00199266	None
5	121367331	T	15	G	21	AF=0.333	0/0/1	3	0.405032	0.0022714	None
5	122950911	G	45	A	44	AF=0.333	0/0/1	3	1	0.00217889	CSNK1G3
5	126172195	C	515	T	474	AF=0.333	0/0/1	3	0.203376	2.31656e-21	LMNB1
5	126859406	G	17	A	10	AF=0.667	0/0/1	3	0.247789	0.00177901	PRRC1
5	126888773	A	17	G	11	AF=0.667	0/0/1	3	0.344928	0.00397389	PRRC1
5	126888852	A	21	G	16	AF=0.667	0/0/1	3	0.511376	0.0044591	PRRC1
5	126889181	T	27	C	25	AF=0.667	0/0/1	3	0.889884	0.007361	PRRC1
5	130745375	G	9	A	3	AF=0.667	0/0/1	3	0.145996	0.00382585	None
5	131974677	A	19	T	12	AF=0.667	0/0/1	3	0.281042	0.00176046	BC042122, RAD50
5	132161294	G	54	A	57	AF=0.667	0/0/1	3	0.84955	0.000836936	SHROOM1
5	132219956	C	12	T	4	AF=0.667	0/0/1	3	0.0768127	0.000784383	AFF4
5	132219991	A	12	G	4	AF=0.667	0/0/1	3	0.0768127	0.000784383	AFF4
5	132220031	C	11	T	4	AF=0.667	0/0/1	3	0.118469	0.0017905	AFF4
5	132232315	G	28	A	30	AF=0.667	0/0/1	3	0.895683	0.017899	AFF4
5	132388068	T	33	G	19	AF=0.667	0/0/1	3	0.0703942	1.0527e-05	HSPA4
5	134133871	T	13	G	8	AF=0.667	0/0/1	3	0.38331	0.00906972	DDX46
5	135516203	T	52	C	58	AF=0.667	0/0/1	3	0.633756	0.00234797	SMAD5
5	135516282	G	57	A	75	AF=0.667	0/0/1	3	0.138668	0.0205546	SMAD5
5	135516836	T	36	C	44	AF=0.667	0/0/1	3	0.434042	0.0321947	SMAD5
5	135517150	T	160	C	151	AF=0.667	0/0/1	3	0.650159	4.86418e-11	SMAD5
5	135517227	G	55	A	40	AF=0.667	0/0/1	3	0.150518	1.01259e-06	SMAD5
5	135517740	T	55	G	44	AF=0.667	0/0/1	3	0.31488	5.60884e-06	SMAD5
5	135518242	G	36	T	37	AF=0.667	0/0/1	3	1	0.00584747	SMAD5
5	137543713	T	8	C	4	AF=0.667	0/0/1	3	0.387695	0.0263932	CDC23
5	137772334	A	117	G	113	AF=0.667	0/0/1	3	0.843245	5.03789e-08	KDM3B
5	140046939	C	16	T	29	AF=0.333	0/0/1	3	0.0724543	2.2225e-05	WDR55
5	141057221	G	11	T	8	AF=0.667	0/0/1	3	0.647606	0.0286644	ARAP3
5	141059158	C	87	G	87	AF=0.667	0/0/1	3	1	5.60043e-06	ARAP3
5	141059868	T	90	C	89	AF=0.333	0/0/1	3	1	7.26694e-06	ARAP3
5	141683373	G	14	A	8	AF=0.667	0/0/1	3	0.286279	0.00507046	None
5	142658156	C	31	A	35	AF=0.333	0/0/1	3	0.712231	0.00099449	NR3C1
5	145493265	A	24	T	22	AF=0.333	0/0/1	3	0.882996	0.0419749	LARS
5	145495911	C	3	T	11	AF=0.333	0/0/1	3	0.057373	0.000684325	LARS
5	145520274	C	47	T	56	AF=0.333	0/0/1	3	0.430689	1.33282e-05	LARS
5	145520275	A	50	G	56	AF=0.333	0/0/1	3	0.627431	4.58034e-05	LARS
5	145521579	C	40	T	36	AF=0.333	0/0/1	3	0.731009	0.0142748	LARS
5	145528625	C	25	T	29	AF=0.333	0/0/1	3	0.683489	0.00218937	LARS
5	145528856	G	29	A	34	AF=0.333	0/0/1	3	0.614655	0.000751396	LARS
5	145560876	G	7	A	11	AF=0.333	0/0/1	3	0.480682	0.0211367	LARS
5	145861909	C	39	T	38	AF=0.667	0/0/1	3	1	0.00224964	TCERG1
5	145861940	T	42	A	43	AF=0.667	0/0/1	3	1	0.00254115	TCERG1
5	148725199	A	14	G	5	AF=0.667	0/0/1	3	0.0635681	0.00037634	GRPEL2
5	148728318	C	17	G	20	AF=0.333	0/0/1	3	0.742829	0.0132397	GRPEL2
5	149234235	C	55	A	48	AF=0.667	0/0/1	3	0.554601	3.49967e-05	PPARGC1B
5	149234236	A	54	T	48	AF=0.667	0/0/1	3	0.620768	5.2162e-05	PPARGC1B
5	149366714	T	19	C	17	AF=0.667	0/0/1	3	0.867939	0.0200101	SLC26A2
5	149389573	A	10	G	3	AF=0.667	0/0/1	3	0.0922852	0.00163342	HMGXB3
5	149408929	G	15	A	10	AF=0.667	0/0/1	3	0.424356	0.00908019	HMGXB3
5	149739119	C	10	G	14	AF=0.333	0/0/1	3	0.541256	0.0151579	TCOF1
5	149772280	C	179	G	165	AF=0.333	0/0/1	3	0.483412	2.22274e-08	TCOF1
5	150489390	A	10	G	22	AF=0.333	0/0/1	3	0.0501025	4.66981e-05	ANXA6
5	151043103	G	49	C	70	AF=0.333	0/0/1	3	0.0662913	1.38119e-08	SPARC
5	153371206	G	2	A	9	AF=0.333	0/0/1	3	0.0654297	0.0013606	None
5	153372525	G	57	A	58	AF=0.333	0/0/1	3	1	0.000152411	FAM114A2
5	153417959	T	38	G	32	AF=0.333	0/0/1	3	0.550413	0.0310729	FAM114A2
5	153830890	G	19	A	17	AF=0.667	0/0/1	3	0.867939	0.0200101	AF157115, SAP30L
5	154203121	C	62	T	51	AF=0.667	0/0/1	3	0.346893	3.02088e-06	FAXDC2
5	157166598	C	77	T	56	AF=0.333	0/0/1	3	0.0824913	0.0342852	THG1L
5	157167472	A	38	G	41	AF=0.333	0/0/1	3	0.822144	0.000731267	AK000953
5	157186060	T	9	C	15	AF=0.333	0/0/1	3	0.307456	0.00397488	AK023159
5	157210977	T	18	A	8	AF=0.667	0/0/1	3	0.0755187	0.000221127	None
5	158701364	C	22	T	11	AF=0.667	0/0/1	3	0.0801433	0.00011855	UBLCP1
5	162876836	C	8	T	3	AF=0.667	0/0/1	3	0.226562	0.00876373	AK124680
5	162940108	C	11	T	3	AF=0.667	0/0/1	3	0.057373	0.000684325	MAT2B
5	167999875	T	3	C	7	AF=0.333	0/0/1	3	0.34375	0.0195481	PANK3
5	172748679	C	18	T	11	AF=0.667	0/0/1	3	0.264931	0.00233297	STC2
5	173315866	C	22	G	24	AF=0.333	0/0/1	3	0.882996	0.0113018	CPEB4
5	175781959	C	9	T	12	AF=0.333	0/0/1	3	0.663624	0.0339537	KIAA1191
5	176492557	G	71	A	56	AF=0.333	0/0/1	3	0.213965	0.0110189	ZNF346
5	176498090	G	13	A	6	AF=0.667	0/0/1	3	0.167068	0.00231089	ZNF346
5	176517797	C	47	T	33	AF=0.667	0/0/1	3	0.145635	3.90977e-06	FGFR4
5	176721272	G	40	C	40	AF=0.667	0/0/1	3	1	0.00274707	NSD1
5	176734855	G	43	C	46	AF=0.667	0/0/1	3	0.832258	0.00335614	MXD3
5	176766177	A	11	G	8	AF=0.667	0/0/1	3	0.647606	0.0286644	LMAN2
5	176830570	G	52	A	62	AF=0.667	0/0/1	3	0.399373	0.00703089	F12
5	176864202	T	4	C	8	AF=0.333	0/0/1	3	0.387695	0.0263932	GRK6
5	176886539	C	2	T	8	AF=0.333	0/0/1	3	0.109375	0.00337964	DBN1
5	176912073	C	39	T	48	AF=0.333	0/0/1	3	0.391191	3.17174e-05	PDLIM7
5	177573786	C	26	T	27	AF=0.667	0/0/1	3	1	0.0190937	RMND5B
5	178180916	G	9	A	3	AF=0.667	0/0/1	3	0.145996	0.00382585	None
5	178245811	G	18	A	28	AF=0.333	0/0/1	3	0.183925	0.00013436	None
5	178245951	T	23	C	14	AF=0.667	0/0/1	3	0.187742	0.000361318	None
5	178246840	C	8	G	15	AF=0.333	0/0/1	3	0.21004	0.00285358	None
5	178249144	C	12	T	20	AF=0.333	0/0/1	3	0.215327	0.00100806	None
5	178315686	C	6	T	13	AF=0.333	0/0/1	3	0.167068	0.00231089	None
5	179050188	A	73	C	70	AF=0.667	0/0/1	3	0.86725	1.64043e-05	HNRNPH1
5	179098060	C	19	A	10	AF=0.667	0/0/1	3	0.136046	0.000510205	None
5	179193876	C	8	T	18	AF=0.333	0/0/1	3	0.0755187	0.000221127	MAML1
5	179260213	G	216	A	209	AF=0.333	0/0/1	3	0.771059	1.48555e-11	SQSTM1
5	180685900	T	29	G	28	AF=0.333	0/0/1	3	1	0.0160482	TRIM52
5	180686958	C	115	T	102	AF=0.333	0/0/1	3	0.415355	3.5643e-05	TRIM52
5	180687212	C	20	T	27	AF=0.333	0/0/1	3	0.381693	0.000906033	TRIM52
5	180698630	C	13	T	20	AF=0.333	0/0/1	3	0.296206	0.00141613	LOC100507602
6	2991225	T	57	C	80	AF=0.75	0/0/0/1	4	0.059768	2.65215e-05	DKFZP686I15217, NQO2
6	3017861	A	11	C	11	AF=0.25	0/0/0/1	4	1	0.0117582	NQO2
6	3018704	A	46	G	64	AF=0.75	0/0/0/1	4	0.104613	0.000146572	NQO2
6	3073912	G	12	A	11	AF=0.25	0/0/0/1	4	1	0.0161959	RIPK1
6	3074021	G	13	A	12	AF=0.25	0/0/0/1	4	1	0.017758	RIPK1
6	3718689	A	10	G	7	AF=0.75	0/0/0/1	4	0.629059	0.00310078	None
6	4119850	T	10	A	10	AF=0.25	0/0/0/1	4	1	0.0170356	C6orf201, ECI2
6	4134768	A	32	G	30	AF=0.25	0/0/0/1	4	0.899076	8.82846e-05	ECI2
6	4799765	C	4	G	7	AF=0.25	0/0/0/1	4	0.548828	0.00756121	CDYL
6	4996129	C	11	T	12	AF=0.75	0/0/0/1	4	1	0.0161959	RPP40
6	5692527	C	11	T	13	AF=0.75	0/0/0/1	4	0.83882	0.0303688	FARS2
6	7201660	T	85	C	101	AF=0.75	0/0/0/1	4	0.271352	9.11021e-10	RREB1
6	7234172	G	10	A	9	AF=0.75	0/0/0/1	4	1	0.0131316	RREB1
6	7238973	G	4	A	6	AF=0.25	0/0/0/1	4	0.753906	0.0197277	RREB1
6	7400141	C	3	G	8	AF=0.25	0/0/0/1	4	0.226562	0.00118828	RIOK1
6	8088932	G	39	A	32	AF=0.25	0/0/0/1	4	0.476688	0.000277867	EEF1E1, EEF1E1-MUTED
6	10829319	C	41	T	45	AF=0.75	0/0/0/1	4	0.746534	7.71722e-06	MAK, SYCP2L, TMEM14B
6	10897488	G	59	A	41	AF=0.25	0/0/0/1	4	0.0886261	0.000461066	SYCP2L
6	11711968	A	27	G	18	AF=0.75	0/0/0/1	4	0.232693	6.79302e-07	None
6	11712013	T	26	C	16	AF=0.75	0/0/0/1	4	0.164149	4.59281e-07	None
6	12125772	A	47	G	36	AF=0.25	0/0/0/1	4	0.272269	0.000307106	HIVEP1
6	12150359	G	21	T	17	AF=0.75	0/0/0/1	4	0.627103	8.34271e-05	HIVEP1
6	12150448	C	18	T	21	AF=0.25	0/0/0/1	4	0.749259	0.000122	HIVEP1
6	13315898	G	12	A	11	AF=0.75	0/0/0/1	4	1	0.0059847	TBC1D7
6	13579908	T	11	G	3	AF=0.75	0/0/0/1	4	0.057373	3.98234e-05	SIRT5
6	13580037	G	11	A	3	AF=0.75	0/0/0/1	4	0.057373	3.98234e-05	SIRT5
6	13613783	A	6	G	5	AF=0.75	0/0/0/1	4	1	0.0343275	SIRT5
6	13633522	T	16	A	20	AF=0.75	0/0/0/1	4	0.617719	0.0112178	RANBP9
6	13787578	G	104	A	133	AF=0.75	0/0/0/1	4	0.068717	2.50335e-10	MCUR1
6	13978854	G	3	T	9	AF=0.25	0/0/0/1	4	0.145996	0.000391662	RNF182
6	14131804	G	17	A	24	AF=0.25	0/0/0/1	4	0.348889	5.19561e-06	CD83
6	15468876	C	93	G	86	AF=0.75	0/0/0/1	4	0.653942	1.32442e-14	JARID2
6	15520778	G	28	T	31	AF=0.75	0/0/0/1	4	0.794844	0.000217154	JARID2
6	15613356	C	11	T	11	AF=0.25	0/0/0/1	4	1	0.0117582	DTNBP1
6	17618898	G	23	A	12	AF=0.75	0/0/0/1	4	0.0895311	4.48735e-07	NUP153
6	17760365	A	55	G	53	AF=0.25	0/0/0/1	4	0.923401	7.77865e-08	KIF13A
6	17815431	G	23	A	18	AF=0.25	0/0/0/1	4	0.532709	0.0101546	KIF13A
6	17815517	A	17	T	24	AF=0.75	0/0/0/1	4	0.348889	0.0190079	KIF13A
6	17815777	A	9	C	5	AF=0.75	0/0/0/1	4	0.42395	0.00215418	KIF13A
6	18128659	T	14	A	12	AF=0.75	0/0/0/1	4	0.845019	0.00209389	TPMT
6	20485077	G	5	C	6	AF=0.25	0/0/0/1	4	1	0.0343275	E2F3
6	24702964	T	9	A	9	AF=0.75	0/0/0/1	4	1	0.0249855	ACOT13
6	24721024	A	76	C	57	AF=0.75	0/0/0/1	4	0.11824	4.50621e-15	None
6	26112164	T	5	G	12	AF=0.25	0/0/0/1	4	0.143463	9.98902e-05	None
6	26127271	A	11	G	13	AF=0.25	0/0/0/1	4	0.83882	0.00309744	HIST1H2AC
6	26137235	A	21	C	11	AF=0.75	0/0/0/1	4	0.110184	1.47966e-06	HIST1H2AC
6	26198518	C	42	T	30	AF=0.25	0/0/0/1	4	0.194505	0.00239615	HIST1H3D
6	26198845	G	33	C	50	AF=0.75	0/0/0/1	4	0.0784196	0.00324713	HIST1H3D
6	26205293	G	22	A	34	AF=0.75	0/0/0/1	4	0.140895	0.0195536	None
6	26229161	C	6	A	4	AF=0.75	0/0/0/1	4	0.753906	0.0197277	None
6	26280295	C	34	A	51	AF=0.75	0/0/0/1	4	0.0820543	0.00241351	None
6	26286149	G	23	T	24	AF=0.75	0/0/0/1	4	1	0.000522526	None
6	26289203	T	15	C	8	AF=0.75	0/0/0/1	4	0.21004	5.45078e-05	None
6	26376628	T	10	C	3	AF=0.75	0/0/0/1	4	0.0922852	0.000126123	BTN3A2
6	26376832	T	16	C	12	AF=0.75	0/0/0/1	4	0.571588	0.000290123	BTN3A2
6	26377546	A	33	G	33	AF=0.75	0/0/0/1	4	1	1.225e-05	BTN3A2
6	26377573	T	41	A	30	AF=0.75	0/0/0/1	4	0.235098	5.96881e-09	BTN3A2
6	26377591	G	31	T	18	AF=0.75	0/0/0/1	4	0.0854331	1.73111e-08	BTN3A2
6	26377927	T	15	C	20	AF=0.75	0/0/0/1	4	0.49956	0.0191126	BTN3A2
6	26377939	G	21	A	18	AF=0.75	0/0/0/1	4	0.749259	0.000122	BTN3A2
6	26378288	T	14	A	7	AF=0.75	0/0/0/1	4	0.189247	6.80598e-05	BTN3A2
6	26391190	G	6	A	4	AF=0.75	0/0/0/1	4	0.753906	0.0197277	BTN2A2
6	27371193	G	55	A	60	AF=0.25	0/0/0/1	4	0.709323	4.40326e-10	None
6	27440004	A	10	C	10	AF=0.25	0/0/0/1	4	1	0.0170356	ZNF184
6	27443957	A	4	C	6	AF=0.25	0/0/0/1	4	0.753906	0.0197277	None
6	33618185	G	5	A	14	AF=0.25	0/0/0/1	4	0.0635681	1.15226e-05	ITPR3
6	33644253	G	13	A	5	AF=0.75	0/0/0/1	4	0.0962524	3.42457e-05	ITPR3
6	33652880	G	64	A	52	AF=0.25	0/0/0/1	4	0.30709	4.36266e-06	ITPR3
6	33658552	C	12	A	8	AF=0.75	0/0/0/1	4	0.503445	0.000935392	ITPR3
6	33660143	G	6	A	5	AF=0.75	0/0/0/1	4	1	0.0343275	ITPR3
6	33674419	T	4	G	12	AF=0.25	0/0/0/1	4	0.0768127	3.81072e-05	MNF1
6	33675642	A	12	G	13	AF=0.25	0/0/0/1	4	1	0.00412299	MNF1
6	33676156	G	16	A	19	AF=0.25	0/0/0/1	4	0.735879	0.000241728	MNF1
6	33678290	C	7	G	17	AF=0.25	0/0/0/1	4	0.0639147	3.0777e-06	MNF1
6	33744711	C	11	T	13	AF=0.25	0/0/0/1	4	0.83882	0.00309744	LEMD2
6	34728230	C	4	G	12	AF=0.25	0/0/0/1	4	0.0768127	3.81072e-05	SNRPC
6	34728253	T	3	C	9	AF=0.25	0/0/0/1	4	0.145996	0.000391662	SNRPC
6	34852150	A	11	G	12	AF=0.75	0/0/0/1	4	1	0.0161959	TAF11, UHRF1BP1
6	35876203	T	11	G	11	AF=0.25	0/0/0/1	4	1	0.0117582	SRPK1
6	36056855	C	11	A	20	AF=0.25	0/0/0/1	4	0.149613	3.91902e-06	MAPK14
6	36096447	A	7	T	3	AF=0.75	0/0/0/1	4	0.34375	0.00350571	None
6	36198421	T	24	C	16	AF=0.25	0/0/0/1	4	0.268187	0.0422871	BRPF3
6	36824937	C	3	T	8	AF=0.25	0/0/0/1	4	0.226562	0.00118828	PPIL1
6	36824971	C	2	A	8	AF=0.25	0/0/0/1	4	0.109375	0.000415802	PPIL1
6	36863834	T	8	G	15	AF=0.25	0/0/0/1	4	0.21004	5.45078e-05	C6orf89
6	36884681	C	8	T	9	AF=0.25	0/0/0/1	4	1	0.0199017	C6orf89
6	36939528	C	13	G	21	AF=0.25	0/0/0/1	4	0.229481	6.20202e-06	MTCH1
6	37444813	G	6	A	7	AF=0.25	0/0/0/1	4	1	0.0242901	FTSJD2
6	38651822	T	12	C	21	AF=0.25	0/0/0/1	4	0.162756	3.1059e-06	GLO1
6	39926242	C	30	T	37	AF=0.25	0/0/0/1	4	0.463818	1.31547e-07	None
6	41016952	A	5	C	7	AF=0.25	0/0/0/1	4	0.774414	0.0142528	UNC5CL
6	41159222	G	14	T	15	AF=0.25	0/0/0/1	4	1	0.00202237	TREML2
6	41533573	G	35	A	27	AF=0.75	0/0/0/1	4	0.374152	1.50781e-07	FOXP4
6	41533579	C	38	A	33	AF=0.75	0/0/0/1	4	0.635308	2.9128e-07	FOXP4
6	41658889	C	17	T	21	AF=0.75	0/0/0/1	4	0.627103	0.00795629	TFEB
6	41762808	C	21	G	28	AF=0.75	0/0/0/1	4	0.391603	0.00733412	None
6	41773576	G	33	C	23	AF=0.25	0/0/0/1	4	0.228806	0.00818271	USP49
6	41773735	G	21	A	33	AF=0.75	0/0/0/1	4	0.133674	0.0264584	USP49
6	42164401	C	2	T	8	AF=0.25	0/0/0/1	4	0.109375	0.000415802	None
6	42174478	A	11	G	11	AF=0.25	0/0/0/1	4	1	0.0117582	None
6	42178578	C	2	G	9	AF=0.25	0/0/0/1	4	0.0654297	0.000126123	MRPS10
6	42660655	G	50	A	62	AF=0.75	0/0/0/1	4	0.298593	8.61697e-06	UBR2
6	42660822	G	27	C	21	AF=0.75	0/0/0/1	4	0.470879	4.90287e-06	UBR2
6	42833594	C	13	T	25	AF=0.25	0/0/0/1	4	0.0729514	1.3654e-07	GLTSCR1L
6	43412865	T	72	C	76	AF=0.75	0/0/0/1	4	0.805321	7.60466e-10	ABCC10
6	43507316	G	9	C	9	AF=0.25	0/0/0/1	4	1	0.0249855	XPO5
6	43581586	G	72	A	65	AF=0.25	0/0/0/1	4	0.608384	1.50249e-08	POLH
6	43582831	C	49	T	32	AF=0.25	0/0/0/1	4	0.0747882	0.00436626	POLH
6	44063217	T	14	C	16	AF=0.25	0/0/0/1	4	0.855536	0.000997571	None
6	44090112	G	11	A	12	AF=0.25	0/0/0/1	4	1	0.0059847	MRPL14
6	44090168	A	11	C	12	AF=0.25	0/0/0/1	4	1	0.0059847	MRPL14
6	44277712	T	22	C	22	AF=0.25	0/0/0/1	4	1	0.000358004	AARS2, SPATS1
6	47574232	T	11	A	10	AF=0.75	0/0/0/1	4	1	0.00880112	CD2AP
6	52229642	T	3	C	8	AF=0.333	0/0/0/1	3	0.226562	0.00876373	PAQR8
6	52531615	C	38	G	41	AF=0.667	0/0/0/1	3	0.822144	0.00814386	LOC730101
6	53383788	C	4	T	10	AF=0.333	0/0/0/1	3	0.179565	0.00400617	GCLC
6	53383918	G	10	A	4	AF=0.667	0/0/0/1	3	0.179565	0.00400617	GCLC
6	71269459	C	95	T	86	AF=0.333	0/0/0/1	3	0.552207	7.4461e-05	FAM135A
6	71289189	A	24	G	33	AF=0.333	0/0/0/1	3	0.289244	0.000187421	C6orf57
6	74211268	C	5	G	14	AF=0.333	0/0/0/1	3	0.0635681	0.00037634	None
6	74229903	C	74	G	79	AF=0.333	0/0/0/1	3	0.746528	4.15373e-06	EEF1A1
6	76425288	A	62	G	57	AF=0.333	0/0/0/1	3	0.714026	0.00121972	SENP6
6	76625188	A	15	G	8	AF=0.667	0/0/0/1	3	0.21004	0.00285358	MYO6
6	80250447	T	8	C	4	AF=0.667	0/0/0/1	3	0.387695	0.0263932	None
6	80752463	G	30	A	29	AF=0.667	0/0/0/1	3	1	0.00551333	None
6	80752922	T	23	C	25	AF=0.667	0/0/0/1	3	0.885433	0.0450523	None
6	81053814	T	24	C	21	AF=0.667	0/0/0/1	3	0.765992	0.00652862	BCKDHB
6	81053866	C	18	T	16	AF=0.667	0/0/0/1	3	0.864166	0.0181199	BCKDHB
6	81055299	A	33	G	23	AF=0.667	0/0/0/1	3	0.228806	9.43681e-05	BCKDHB
6	81055413	T	47	C	33	AF=0.667	0/0/0/1	3	0.145635	3.90977e-06	BCKDHB
6	85421715	G	14	A	6	AF=0.667	0/0/0/1	3	0.115318	0.00117265	TBX18
6	87970301	C	13	G	6	AF=0.667	0/0/0/1	3	0.167068	0.00231089	ZNF292
6	88051262	T	22	C	26	AF=0.333	0/0/0/1	3	0.665466	0.00325014	SMIM8
6	88194810	T	5	C	8	AF=0.333	0/0/0/1	3	0.581055	0.0396204	C6orf165, SLC35A1
6	88221546	A	109	G	87	AF=0.333	0/0/0/1	3	0.133408	0.00139259	SLC35A1
6	88961293	G	11	A	8	AF=0.667	0/0/0/1	3	0.647606	0.0286644	None
6	90037968	T	40	G	40	AF=0.667	0/0/0/1	3	1	0.00274707	UBE2J1
6	90408742	C	70	T	76	AF=0.667	0/0/0/1	3	0.679164	0.000286947	MDN1
6	90565242	A	44	G	39	AF=0.333	0/0/0/1	3	0.660884	0.0101367	CASP8AP2
6	97613299	G	15	A	16	AF=0.333	0/0/0/1	3	1	0.0361149	MIR548H3, MMS22L
6	99319578	C	15	T	17	AF=0.333	0/0/0/1	3	0.86005	0.0232719	None
6	99909857	G	22	A	16	AF=0.667	0/0/0/1	3	0.417692	0.00280048	USP45
6	101094554	A	23	G	35	AF=0.333	0/0/0/1	3	0.148006	3.30546e-05	ASCC3
6	105529487	C	161	G	159	AF=0.667	0/0/0/1	3	0.955432	4.47017e-10	LIN28B
6	105821449	A	102	G	91	AF=0.333	0/0/0/1	3	0.471732	6.64222e-05	PREP
6	106633353	C	13	A	11	AF=0.667	0/0/0/1	3	0.83882	0.048265	ATG5
6	107077310	G	88	A	116	AF=0.333	0/0/0/1	3	0.0584411	5.58099e-12	RTN4IP1
6	107113715	G	61	A	68	AF=0.667	0/0/0/1	3	0.597485	0.00102227	QRSL1
6	107115394	A	17	G	14	AF=0.667	0/0/0/1	3	0.7201	0.0203061	QRSL1
6	107365376	C	4	T	9	AF=0.333	0/0/0/1	3	0.266846	0.0139305	C6orf203
6	109197409	G	14	T	5	AF=0.667	0/0/0/1	3	0.0635681	0.00037634	ARMC2
6	111134929	T	45	C	48	AF=0.667	0/0/0/1	3	0.835846	0.00280268	BC047513, CDK19
6	111134940	T	45	C	45	AF=0.667	0/0/0/1	3	1	0.00109985	BC047513, CDK19
6	111594102	C	4	T	12	AF=0.333	0/0/0/1	3	0.0768127	0.000784383	None
6	111630939	A	15	T	16	AF=0.333	0/0/0/1	3	1	0.0361149	REV3L
6	111695073	C	3	T	8	AF=0.333	0/0/0/1	3	0.226562	0.00876373	REV3L
6	111696852	T	26	C	23	AF=0.333	0/0/0/1	3	0.77545	0.0487661	REV3L
6	116973182	T	57	C	59	AF=0.667	0/0/0/1	3	0.926078	0.000504394	ZUFSP
6	117994158	G	15	A	6	AF=0.667	0/0/0/1	3	0.0783539	0.000602161	None
6	119231968	T	46	C	41	AF=0.667	0/0/0/1	3	0.668285	0.000223226	MCM9
6	119508115	G	10	A	15	AF=0.333	0/0/0/1	3	0.424356	0.00908019	MAN1A1
6	119508871	C	16	T	11	AF=0.667	0/0/0/1	3	0.442068	0.00680476	MAN1A1
6	119675097	T	9	G	3	AF=0.667	0/0/0/1	3	0.145996	0.00382585	None
6	127589302	T	11	A	13	AF=0.333	0/0/0/1	3	0.83882	0.048265	RNF146
6	130381246	T	26	C	23	AF=0.333	0/0/0/1	3	0.77545	0.0487661	L3MBTL3
6	133138959	T	26	C	26	AF=0.333	0/0/0/1	3	1	0.0175169	None
6	135346351	G	8	A	5	AF=0.667	0/0/0/1	3	0.581055	0.0396204	HBS1L
6	139309168	G	16	A	19	AF=0.75	0/0/0/1	4	0.735879	0.0095201	REPS1
6	150673418	C	30	T	19	AF=0.75	0/0/0/1	4	0.152408	8.64487e-08	None
6	158991946	A	7	T	5	AF=0.75	0/0/0/1	4	0.774414	0.0142528	TMEM181
6	161538255	A	126	G	106	AF=0.25	0/0/0/1	4	0.212156	9.50005e-12	MAP3K4
6	167373045	T	2	C	9	AF=0.25	0/0/0/1	4	0.0654297	0.000126123	None
6	167398345	C	52	A	60	AF=0.25	0/0/0/1	4	0.508513	1.05382e-10	None
6	167432036	A	39	G	23	AF=0.25	0/0/0/1	4	0.0558972	0.0386528	CCR6, FGFR1OP
6	168363959	G	9	A	11	AF=0.25	0/0/0/1	4	0.823803	0.00394214	BX649158, MLLT4
6	170115587	C	10	T	12	AF=0.25	0/0/0/1	4	0.831812	0.00465479	PHF10
7	916908	C	2	T	9	AF=0.333	0/0/0/1/1	3	0.0654297	0.0013606	GET4
7	1006128	C	11	T	7	AF=0.667	0/0/0/1/1	3	0.480682	0.0211367	ADAP1, COX19
7	1008307	C	22	T	10	AF=0.667	0/0/0/1/1	3	0.0501025	4.66981e-05	ADAP1, COX19
7	1036851	G	505	A	499	AF=0.667	0/0/0/1/1	3	0.874626	1.70399e-28	C7orf50
7	1037066	G	313	A	342	AF=0.667	0/0/0/1/1	3	0.273921	2.06396e-14	C7orf50
7	1064720	A	24	G	17	AF=0.667	0/0/0/1/1	3	0.348889	0.00127757	C7orf50
7	1199632	T	101	C	91	AF=0.667	0/0/0/1/1	3	0.51611	3.80366e-08	ZFAND2A
7	1202956	G	18	C	16	AF=0.667	0/0/0/1/1	3	0.864166	0.0181199	AK090593
7	1202963	A	18	G	16	AF=0.667	0/0/0/1/1	3	0.864166	0.0181199	AK090593
7	1202980	T	18	G	8	AF=0.667	0/0/0/1/1	3	0.0755187	0.000221127	AK090593
7	1203801	T	10	C	3	AF=0.667	0/0/0/1/1	3	0.0922852	0.00163342	AK090593
7	1204295	A	27	G	26	AF=0.667	0/0/0/1/1	3	1	0.00836215	AK090593
7	1204504	G	19	A	11	AF=0.667	0/0/0/1/1	3	0.200488	0.000811461	AK090593
7	1205666	C	11	A	8	AF=0.667	0/0/0/1/1	3	0.647606	0.0286644	None
7	1473997	C	12	T	16	AF=0.333	0/0/0/1/1	3	0.571588	0.0142174	MICALL2
7	1478277	G	20	A	18	AF=0.667	0/0/0/1/1	3	0.871415	0.0152318	MICALL2
7	1479952	C	14	G	7	AF=0.667	0/0/0/1/1	3	0.189247	0.00201017	MICALL2
7	2278183	C	56	T	51	AF=0.333	0/0/0/1/1	3	0.699175	0.0020388	FTSJ2
7	2278226	C	62	T	67	AF=0.333	0/0/0/1/1	3	0.724854	1.39751e-05	FTSJ2
7	2294123	C	29	T	31	AF=0.333	0/0/0/1/1	3	0.897422	0.00369909	SNX8
7	2294401	A	35	G	35	AF=0.667	0/0/0/1/1	3	1	0.00485121	SNX8
7	2577691	C	100	G	118	AF=0.667	0/0/0/1/1	3	0.249516	0.000128863	BRAT1
7	2579757	G	64	A	55	AF=0.333	0/0/0/1/1	3	0.463488	0.00344413	BRAT1
7	2768561	C	68	T	84	AF=0.333	0/0/0/1/1	3	0.223613	3.38484e-08	GNA12
7	4806032	A	27	C	38	AF=0.333	0/0/0/1/1	3	0.214539	3.35705e-05	FOXK1
7	5518268	T	7	A	14	AF=0.333	0/0/0/1/1	3	0.189247	0.00201017	FBXL18
7	5541657	G	19	A	18	AF=0.667	0/0/0/1/1	3	1	0.0234257	FBXL18
7	5639233	T	12	A	6	AF=0.667	0/0/0/1/1	3	0.237885	0.00456538	FSCN1
7	6507417	C	6	T	15	AF=0.333	0/0/0/1/1	3	0.0783539	0.000602161	DAGLB, KDELR2
7	6513757	G	9	A	14	AF=0.333	0/0/0/1/1	3	0.404873	0.00725583	DAGLB, KDELR2
7	6519084	C	5	A	12	AF=0.333	0/0/0/1/1	3	0.143463	0.00288012	DAGLB, KDELR2
7	7285869	G	27	A	19	AF=0.667	0/0/0/1/1	3	0.301996	0.000458203	C1GALT1
7	8161301	G	14	A	9	AF=0.667	0/0/0/1/1	3	0.404873	0.00725583	ICA1
7	10461481	G	10	A	6	AF=0.667	0/0/0/1/1	3	0.454498	0.0173614	None
7	10478007	C	14	T	17	AF=0.333	0/0/0/1/1	3	0.7201	0.0203061	None
7	10491938	T	9	C	19	AF=0.333	0/0/0/1/1	3	0.0871586	0.000206176	None
7	10659807	G	10	A	5	AF=0.667	0/0/0/1/1	3	0.301758	0.0107384	None
7	10767861	C	17	T	8	AF=0.667	0/0/0/1/1	3	0.107752	0.000449631	None
7	12728862	C	107	G	96	AF=0.333	0/0/0/1/1	3	0.482857	3.80141e-05	ARL4A
7	16129643	T	14	C	17	AF=0.333	0/0/0/1/1	3	0.7201	0.0203061	ISPD
7	16316655	G	5	C	10	AF=0.333	0/0/0/1/1	3	0.301758	0.0107384	ISPD
7	16324971	A	53	T	42	AF=0.667	0/0/0/1/1	3	0.304885	9.10943e-06	ISPD
7	16328627	G	18	A	18	AF=0.667	0/0/0/1/1	3	1	0.0497778	ISPD
7	16329820	G	51	A	53	AF=0.667	0/0/0/1/1	3	0.921949	0.00113826	ISPD
7	16331212	T	55	G	41	AF=0.667	0/0/0/1/1	3	0.184286	1.94916e-06	ISPD
7	16331265	T	32	A	23	AF=0.667	0/0/0/1/1	3	0.28061	0.000160643	ISPD
7	16339553	G	2	A	9	AF=0.333	0/0/0/1/1	3	0.0654297	0.0013606	ISPD
7	16640358	T	124	C	109	AF=0.333	0/0/0/1/1	3	0.359082	2.03336e-05	ANKMY2
7	16641749	A	20	C	32	AF=0.333	0/0/0/1/1	3	0.126347	4.25617e-05	ANKMY2
7	22617721	G	17	A	15	AF=0.667	0/0/0/1/1	3	0.86005	0.0232719	None
7	22698466	T	27	C	23	AF=0.667	0/0/0/1/1	3	0.671811	0.00381437	None
7	23015831	T	101	C	130	AF=0.667	0/0/0/1/1	3	0.0652034	0.00100188	FAM126A
7	23020672	G	17	A	10	AF=0.667	0/0/0/1/1	3	0.247789	0.00177901	FAM126A
7	23021082	A	8	C	3	AF=0.667	0/0/0/1/1	3	0.226562	0.00876373	FAM126A
7	23545090	G	109	C	109	AF=0.667	0/0/0/1/1	3	1	3.84776e-07	TRA2A
7	26232367	T	34	C	32	AF=0.333	0/0/0/1/1	3	0.902159	0.0124491	HNRNPA2B1
7	26247074	C	9	G	12	AF=0.333	0/0/0/1/1	3	0.663624	0.0339537	CBX3
7	32625917	A	105	G	79	AF=0.333	0/0/0/1/1	3	0.0650326	0.00763026	AVL9, DPY19L1P1
7	32626006	A	70	G	83	AF=0.667	0/0/0/1/1	3	0.331993	0.00144192	AVL9, DPY19L1P1
7	32678958	G	8	A	18	AF=0.333	0/0/0/1/1	3	0.0755187	0.000221127	AVL9, DPY19L1P1
7	32793767	G	33	A	19	AF=0.667	0/0/0/1/1	3	0.0703942	1.0527e-05	AK057321, AVL9
7	32795568	A	39	G	41	AF=0.333	0/0/0/1/1	3	0.911072	0.0011959	AVL9
7	32798383	G	23	C	29	AF=0.333	0/0/0/1/1	3	0.488456	0.00100931	AVL9, LOC401321
7	33044522	A	4	G	8	AF=0.333	0/0/0/1/1	3	0.387695	0.0263932	AVL9, FKBP9
7	35734243	C	16	A	11	AF=0.667	0/0/0/1/1	3	0.442068	0.00680476	HERPUD2
7	35737648	C	14	T	15	AF=0.333	0/0/0/1/1	3	1	0.0471081	DQ594967
7	36482803	A	8	G	13	AF=0.333	0/0/0/1/1	3	0.38331	0.00906972	ANLN
7	38390083	A	21	G	22	AF=0.667	0/0/0/1/1	3	1	0.0354382	LOC100506776
7	38402134	A	23	G	13	AF=0.667	0/0/0/1/1	3	0.132498	0.000249756	LOC100506776
7	38402140	C	23	T	13	AF=0.667	0/0/0/1/1	3	0.132498	0.000249756	LOC100506776
7	38764350	C	51	T	43	AF=0.667	0/0/0/1/1	3	0.470492	3.86947e-05	VPS41
7	39609805	G	20	A	22	AF=0.333	0/0/0/1/1	3	0.877614	0.0130199	YAE1D1
7	39989027	C	4	T	9	AF=0.333	0/0/0/1/1	3	0.266846	0.0139305	None
7	40105128	G	7	C	17	AF=0.333	0/0/0/1/1	3	0.0639147	0.000250307	CDK13
7	40105601	T	29	C	19	AF=0.667	0/0/0/1/1	3	0.193413	0.000159683	CDK13
7	43656763	A	11	G	15	AF=0.333	0/0/0/1/1	3	0.557197	0.0116391	COA1, STK17A
7	43659764	G	22	C	11	AF=0.667	0/0/0/1/1	3	0.0801433	0.00011855	COA1, STK17A
7	43667576	C	5	T	14	AF=0.333	0/0/0/1/1	3	0.0635681	0.00037634	COA1
7	43673167	T	8	C	11	AF=0.333	0/0/0/1/1	3	0.647606	0.0286644	COA1
7	43695628	C	16	T	17	AF=0.333	0/0/0/1/1	3	1	0.0401064	COA1
7	44085535	T	11	C	17	AF=0.333	0/0/0/1/1	3	0.344928	0.00397389	DBNL
7	44097696	T	21	C	27	AF=0.333	0/0/0/1/1	3	0.470879	0.00114477	DBNL
7	44121936	C	5	A	8	AF=0.333	0/0/0/1/1	3	0.581055	0.0396204	POLM
7	44234737	C	8	T	5	AF=0.667	0/0/0/1/1	3	0.581055	0.0396204	None
7	44923884	T	54	G	67	AF=0.667	0/0/0/1/1	3	0.275253	0.0117757	PURB
7	45763754	T	8	A	5	AF=0.667	0/0/0/1/1	3	0.581055	0.0396204	BC015774, SEPT7P2
7	45764959	C	9	T	4	AF=0.667	0/0/0/1/1	3	0.266846	0.0139305	BC015774, SEPT7P2
7	45766896	A	40	G	53	AF=0.333	0/0/0/1/1	3	0.213153	4.07807e-06	SEPT7P2
7	50658729	C	61	T	56	AF=0.333	0/0/0/1/1	3	0.711703	0.0011421	GRB10
7	53838347	A	6	G	16	AF=0.333	0/0/0/1/1	3	0.0524788	0.000315891	FLJ45974
7	55540707	G	124	A	101	AF=0.333	0/0/0/1/1	3	0.142297	0.000298197	VOPP1
7	56120881	G	14	A	15	AF=0.333	0/0/0/1/1	3	1	0.0471081	CCT6A, PSPH
7	63944901	G	5	T	9	AF=0.25	0/0/0/1/1	4	0.42395	0.00215418	None
7	73020337	C	6	G	8	AF=0.25	0/0/0/1/1	4	0.790527	0.0103095	MLXIPL
7	73607937	C	48	T	53	AF=0.25	0/0/0/1/1	4	0.690826	4.74012e-09	EIF4H
7	99500899	T	80	C	82	AF=0.25	0/0/0/1/1	4	0.937409	3.83476e-12	TRIM4
7	101458959	T	2	C	8	AF=0.25	0/0/0/1/1	4	0.109375	0.000415802	None
7	104913239	T	18	C	10	AF=0.6	0/0/0/1/1	5	0.184933	0.0113181	SRPK2
7	105141152	T	55	C	65	AF=0.4	0/0/0/1/1	5	0.411423	0.00199175	PUS7
7	105147821	G	5	C	11	AF=0.4	0/0/0/1/1	5	0.210114	0.0224332	PUS7
7	105176896	G	10	A	16	AF=0.4	0/0/0/1/1	5	0.32694	0.0282873	RINT1
7	105178819	G	51	T	56	AF=0.4	0/0/0/1/1	5	0.699175	0.0102163	RINT1
7	105182605	A	11	G	21	AF=0.4	0/0/0/1/1	5	0.110184	0.00370802	RINT1
7	105733094	G	9	C	20	AF=0.4	0/0/0/1/1	5	0.0614283	0.00199512	SYPL1
7	107384455	A	58	G	42	AF=0.6	0/0/0/1/1	5	0.133211	0.000316238	CBLL1
7	107544208	C	39	G	44	AF=0.4	0/0/0/1/1	5	0.660884	0.0183059	DLD
7	107559732	G	421	T	450	AF=0.4	0/0/0/1/1	5	0.342756	3.75279e-12	DLD
7	107559911	G	733	A	687	AF=0.4	0/0/0/1/1	5	0.232397	1.77535e-10	DLD
7	107560191	C	518	T	498	AF=0.4	0/0/0/1/1	5	0.551141	6.2634e-09	DLD
7	107560682	T	40	C	48	AF=0.4	0/0/0/1/1	5	0.455741	0.00633714	DLD
7	107562266	A	18	G	31	AF=0.2	0/0/0/1/1	5	0.0854331	5.19001e-11	None
7	111181600	G	8	A	8	AF=0.2	0/0/0/1/1	5	1	0.00700356	IMMP2L
7	111195439	G	8	A	15	AF=0.2	0/0/0/1/1	5	0.21004	3.07025e-06	IMMP2L
7	112116198	G	66	A	60	AF=0.6	0/0/0/1/1	5	0.656178	0.00614052	IFRD1
7	117832138	G	203	A	182	AF=0.4	0/0/0/1/1	5	0.308059	0.00416853	NAA38
7	120639617	A	11	C	3	AF=0.6	0/0/0/1/1	5	0.057373	0.00469005	CPED1
7	120646897	G	18	A	9	AF=0.6	0/0/0/1/1	5	0.122078	0.00568381	CPED1
7	120660682	C	2	T	9	AF=0.4	0/0/0/1/1	5	0.0654297	0.00955242	CPED1
7	120667666	T	21	C	30	AF=0.4	0/0/0/1/1	5	0.262438	0.00935467	CPED1
7	120720049	G	289	T	324	AF=0.6	0/0/0/1/1	5	0.169624	0.000383773	CPED1
7	120788640	G	8	C	17	AF=0.4	0/0/0/1/1	5	0.107752	0.00669316	CPED1
7	120795360	G	10	A	19	AF=0.4	0/0/0/1/1	5	0.136046	0.0070529	CPED1
7	120796712	A	8	C	15	AF=0.4	0/0/0/1/1	5	0.21004	0.0179764	CPED1
7	120885264	C	11	G	6	AF=0.6	0/0/0/1/1	5	0.332306	0.0471316	CPED1
7	123187030	T	11	C	6	AF=0.6	0/0/0/1/1	5	0.332306	0.0471316	NDUFA5
7	123390143	G	63	A	46	AF=0.6	0/0/0/1/1	5	0.125005	0.000185494	AL110181
7	124531338	C	16	T	6	AF=0.6	0/0/0/1/1	5	0.0524788	0.00347973	POT1
7	126992656	T	25	C	37	AF=0.4	0/0/0/1/1	5	0.161881	0.00255717	None
7	127382743	A	3	G	10	AF=0.4	0/0/0/1/1	5	0.0922852	0.00909909	SND1
7	127953243	T	501	C	493	AF=0.4	0/0/0/1/1	5	0.824307	1.03162e-09	RBM28
7	128034629	C	321	T	275	AF=0.6	0/0/0/1/1	5	0.0651991	9.45241e-12	IMPDH1
7	128697697	A	15	C	9	AF=0.8	0/0/0/1/1	5	0.307456	6.66429e-06	None
7	129102065	T	29	G	33	AF=0.2	0/0/0/1/1	5	0.703537	6.89529e-09	STRIP2
7	129246450	T	19	C	9	AF=0.6	0/0/0/1/1	5	0.0871586	0.00338153	None
7	129250624	G	2	A	9	AF=0.4	0/0/0/1/1	5	0.0654297	0.00955242	None
7	129266491	T	9	C	3	AF=0.6	0/0/0/1/1	5	0.145996	0.017444	NRF1
7	129297332	T	92	G	96	AF=0.6	0/0/0/1/1	5	0.82688	0.0139014	NRF1
7	129405778	T	3	C	8	AF=0.4	0/0/0/1/1	5	0.226562	0.0329095	None
7	129771117	G	55	A	56	AF=0.4	0/0/0/1/1	5	1	0.0260041	KLHDC10
7	129774204	G	194	A	203	AF=0.6	0/0/0/1/1	5	0.688098	0.00039535	KLHDC10
7	129774714	C	149	T	161	AF=0.6	0/0/0/1/1	5	0.532198	0.00443289	KLHDC10
7	132651425	T	3	C	8	AF=0.4	0/0/0/1/1	5	0.226562	0.0329095	CHCHD3
7	133749889	C	161	G	151	AF=0.4	0/0/0/1/1	5	0.610456	0.00314415	EXOC4
7	133749964	G	229	A	196	AF=0.4	0/0/0/1/1	5	0.120505	0.0114857	EXOC4
7	134673607	T	38	G	28	AF=0.6	0/0/0/1/1	5	0.267812	0.00528451	AGBL3
7	134845415	C	24	T	17	AF=0.6	0/0/0/1/1	5	0.348889	0.0170295	C7orf49, TMEM140
7	134845432	G	22	A	15	AF=0.6	0/0/0/1/1	5	0.324009	0.0185104	C7orf49, TMEM140
7	134879830	G	98	A	125	AF=0.4	0/0/0/1/1	5	0.0814361	1.43862e-06	WDR91
7	134882118	C	9	T	15	AF=0.4	0/0/0/1/1	5	0.307456	0.0351072	WDR91
7	135943264	G	9	A	17	AF=0.4	0/0/0/1/1	5	0.168638	0.0144927	None
7	135966419	T	17	C	9	AF=0.6	0/0/0/1/1	5	0.168638	0.0144927	None
7	139044172	C	60	A	54	AF=0.6	0/0/0/1/1	5	0.639769	0.00721684	C7orf55-LUC7L2, LUC7L2
7	139051120	T	12	A	5	AF=0.6	0/0/0/1/1	5	0.143463	0.0126818	C7orf55-LUC7L2, LUC7L2
7	139052510	A	27	T	15	AF=0.6	0/0/0/1/1	5	0.0884295	0.00231513	C7orf55-LUC7L2, LUC7L2
7	139104461	G	61	T	78	AF=0.4	0/0/0/1/1	5	0.174532	0.000129205	C7orf55-LUC7L2, LOC100129148, LUC7L2
7	139252780	T	43	C	53	AF=0.4	0/0/0/1/1	5	0.358398	0.00331527	HIPK2
7	139786186	G	19	A	14	AF=0.6	0/0/0/1/1	5	0.48685	0.0495872	JHDM1D
7	140080087	C	54	G	38	AF=0.6	0/0/0/1/1	5	0.11737	0.000385428	SLC37A3
7	142498735	A	22	C	29	AF=0.2	0/0/0/1/1	5	0.401062	7.54331e-09	BV03S1J2.2, TCRVB
7	142498738	C	26	G	29	AF=0.2	0/0/0/1/1	5	0.787706	7.33867e-08	BV03S1J2.2, TCRVB
7	142639321	T	9	C	4	AF=0.6	0/0/0/1/1	5	0.266846	0.0447097	KEL
7	142643099	T	11	C	23	AF=0.4	0/0/0/1/1	5	0.0576127	0.00135114	KEL
7	142644474	G	24	A	30	AF=0.4	0/0/0/1/1	5	0.496617	0.0254308	KEL
7	142647720	C	67	A	71	AF=0.4	0/0/0/1/1	5	0.798545	0.00694673	KEL
7	143080060	A	112	T	104	AF=0.4	0/0/0/1/1	5	0.63397	0.0151124	ZYX
7	143599247	A	36	G	42	AF=0.4	0/0/0/1/1	5	0.571587	0.0149007	FAM115A
7	145579423	A	22	G	11	AF=0.6	0/0/0/1/1	5	0.0801433	0.00224667	None
7	145641471	A	4	G	11	AF=0.4	0/0/0/1/1	5	0.118469	0.0145197	None
7	148990469	C	32	T	49	AF=0.4	0/0/0/1/1	5	0.0747882	0.000239856	LOC155060
7	149186767	T	10	A	20	AF=0.4	0/0/0/1/1	5	0.0987371	0.00436396	ZNF746
7	149300324	C	21	T	13	AF=0.6	0/0/0/1/1	5	0.229481	0.0132142	ZNF767
7	149312271	A	11	G	5	AF=0.6	0/0/0/1/1	5	0.210114	0.0224332	ZNF767
7	149321643	G	80	A	67	AF=0.6	0/0/0/1/1	5	0.322308	0.000513051	ZNF767
7	150104410	C	11	T	5	AF=0.6	0/0/0/1/1	5	0.210114	0.0224332	LOC728743
7	150645023	G	24	A	16	AF=0.6	0/0/0/1/1	5	0.268187	0.0144064	KCNH2
7	150725722	A	20	C	29	AF=0.4	0/0/0/1/1	5	0.25287	0.0081134	ABCB8
7	150732812	C	205	T	172	AF=0.4	0/0/0/1/1	5	0.0992071	0.0272338	ABCB8
7	150762871	G	11	A	16	AF=0.4	0/0/0/1/1	5	0.442068	0.049192	SLC4A2
7	150766738	T	9	C	15	AF=0.4	0/0/0/1/1	5	0.307456	0.0351072	SLC4A2
7	150787450	T	4	G	7	AF=0.2	0/0/0/1/1	5	0.548828	0.00196536	AGAP3
7	150908266	T	10	C	16	AF=0.4	0/0/0/1/1	5	0.32694	0.0282873	ABCF2
7	150909716	G	47	A	59	AF=0.4	0/0/0/1/1	5	0.285284	0.00139588	ABCF2
7	151071926	C	9	T	3	AF=0.6	0/0/0/1/1	5	0.145996	0.017444	NUB1
7	152338795	T	12	C	22	AF=0.2	0/0/0/1/1	5	0.121449	1.81288e-08	None
7	152339693	G	33	A	37	AF=0.4	0/0/0/1/1	5	0.720203	0.0372776	None
7	152344892	T	191	A	198	AF=0.6	0/0/0/1/1	5	0.761012	0.000285118	XRCC2
7	152372816	C	13	G	23	AF=0.4	0/0/0/1/1	5	0.132498	0.00564766	XRCC2
7	153069515	G	10	T	19	AF=0.4	0/0/0/1/1	5	0.136046	0.0070529	None
7	153069527	T	10	G	19	AF=0.4	0/0/0/1/1	5	0.136046	0.0070529	None
7	153100282	C	34	A	20	AF=0.2	0/0/0/1/1	5	0.0759047	0.00339878	None
7	155003395	A	6	G	11	AF=0.4	0/0/0/1/1	5	0.332306	0.0471316	None
7	155088196	A	70	G	62	AF=0.6	0/0/0/1/1	5	0.542507	0.0032119	None
7	155093087	C	16	T	27	AF=0.4	0/0/0/1/1	5	0.126289	0.0028574	INSIG1
7	155099650	T	21	C	14	AF=0.6	0/0/0/1/1	5	0.310505	0.0234243	INSIG1
7	155099655	C	21	T	13	AF=0.6	0/0/0/1/1	5	0.229481	0.0132142	INSIG1
7	155099656	A	21	G	13	AF=0.6	0/0/0/1/1	5	0.229481	0.0132142	INSIG1
7	155503920	A	31	T	49	AF=0.8	0/0/0/1/1	5	0.0566644	0.000113866	RBM33
7	155569167	C	18	T	25	AF=0.4	0/0/0/1/1	5	0.360378	0.0188935	RBM33
7	156471840	T	71	C	84	AF=0.4	0/0/0/1/1	5	0.335135	0.00039512	None
7	156476389	A	78	G	62	AF=0.6	0/0/0/1/1	5	0.204732	0.000190125	LMBR1
7	156974354	G	198	A	191	AF=0.6	0/0/0/1/1	5	0.761012	1.62017e-05	UBE3C
7	157026984	G	6	A	15	AF=0.4	0/0/0/1/1	5	0.0783539	0.00592977	UBE3C
7	157052394	G	6	A	11	AF=0.4	0/0/0/1/1	5	0.332306	0.0471316	UBE3C
7	158426726	A	21	G	33	AF=0.4	0/0/0/1/1	5	0.133674	0.00202477	NCAPG2
7	158430543	C	16	A	11	AF=0.6	0/0/0/1/1	5	0.442068	0.049192	NCAPG2
7	158433732	T	17	C	30	AF=0.4	0/0/0/1/1	5	0.0789407	0.00146383	NCAPG2
7	158468330	A	351	G	366	AF=0.6	0/0/0/1/1	5	0.601117	1.23108e-06	NCAPG2
7	158724905	C	8	T	3	AF=0.6	0/0/0/1/1	5	0.226562	0.0329095	WDR60
8	186529	G	11	A	20	AF=0.333	1/1/1	3	0.149613	0.000427488	ZNF596
8	1706675	C	6	T	13	AF=0.333	1/1/1	3	0.167068	0.00231089	None
8	1709593	C	31	G	48	AF=0.333	1/1/1	3	0.0711634	8.86231e-07	None
8	1806229	A	19	C	23	AF=0.333	1/1/1	3	0.643969	0.00482068	ARHGEF10
8	2520541	G	8	A	16	AF=0.333	1/1/1	3	0.15159	0.000908996	None
8	2523252	G	23	A	39	AF=0.333	1/1/1	3	0.0558972	2.26995e-06	None
8	2527251	C	17	T	18	AF=0.333	1/1/1	3	1	0.0302073	None
8	2572683	G	15	A	20	AF=0.333	1/1/1	3	0.49956	0.00386216	AK128880
8	2572703	C	24	T	27	AF=0.333	1/1/1	3	0.779768	0.00433363	AK128880
8	2582764	C	15	T	17	AF=0.333	1/1/1	3	0.86005	0.0232719	AK128880
8	2585814	C	35	T	36	AF=0.333	1/1/1	3	1	0.00242686	AK128880
8	2670848	T	3	A	9	AF=0.333	1/1/1	3	0.145996	0.00382585	None
8	6263306	T	28	G	32	AF=0.667	1/1/1	3	0.698883	0.0388024	LOC100287015
8	6263307	T	33	A	32	AF=0.667	1/1/1	3	1	0.00365093	LOC100287015
8	6263807	T	67	C	69	AF=0.667	1/1/1	3	0.931708	0.000120649	LOC100287015
8	6263939	C	26	T	18	AF=0.667	1/1/1	3	0.291215	0.00058501	LOC100287015
8	8092405	A	74	C	53	AF=0.667	1/1/1	3	0.0755306	1.27497e-08	FAM86B3P
8	8093511	A	118	G	130	AF=0.667	1/1/1	3	0.48494	3.91033e-06	FAM86B3P
8	8098038	T	41	C	48	AF=0.667	1/1/1	3	0.525015	0.0130523	FAM86B3P
8	8641125	C	49	T	45	AF=0.333	1/1/1	3	0.757189	0.00415483	None
8	8641145	C	45	T	48	AF=0.667	1/1/1	3	0.835846	0.00280268	None
8	8890814	A	12	G	8	AF=0.667	1/1/1	3	0.503445	0.0161994	ERI1
8	8997975	G	2	A	8	AF=0.333	1/1/1	3	0.109375	0.00337964	PPP1R3B
8	10669464	G	8	A	15	AF=0.333	1/1/1	3	0.21004	0.00285358	PINX1, SOX7
8	11644751	A	24	G	19	AF=0.667	1/1/1	3	0.542384	0.00305132	NEIL2
8	11662325	T	32	C	24	AF=0.667	1/1/1	3	0.349682	0.000302402	FDFT1
8	11664738	C	13	T	9	AF=0.667	1/1/1	3	0.523467	0.0208981	FDFT1
8	11665217	G	15	A	14	AF=0.667	1/1/1	3	1	0.0471081	FDFT1
8	11689228	T	11	G	4	AF=0.667	1/1/1	3	0.118469	0.0017905	FDFT1
8	11699988	C	3	T	10	AF=0.333	1/1/1	3	0.0922852	0.00163342	None
8	11700101	T	24	C	15	AF=0.667	1/1/1	3	0.199591	0.000466529	CTSB
8	12990734	C	7	A	11	AF=0.333	1/1/1	3	0.480682	0.0211367	DLC1
8	17079358	A	23	G	31	AF=0.333	1/1/1	3	0.340891	0.000400795	ZDHHC2
8	17084694	G	5	A	11	AF=0.333	1/1/1	3	0.210114	0.00553862	None
8	17084807	C	11	T	5	AF=0.667	1/1/1	3	0.210114	0.00553862	None
8	17156904	T	16	C	19	AF=0.333	1/1/1	3	0.735879	0.0113954	MTMR7
8	17796382	A	91	G	116	AF=0.667	1/1/1	3	0.095055	0.00147012	PCM1
8	17796383	C	95	T	113	AF=0.667	1/1/1	3	0.23843	0.000220589	PCM1
8	17814915	A	143	G	149	AF=0.667	1/1/1	3	0.769884	3.54688e-08	PCM1
8	17942204	C	19	T	14	AF=0.667	1/1/1	3	0.48685	0.00486711	ASAH1
8	19700014	T	34	G	26	AF=0.667	1/1/1	3	0.366294	0.000279964	INTS10
8	20070941	C	12	T	20	AF=0.333	1/1/1	3	0.215327	0.00100806	ATP6V1B2
8	22266530	C	15	T	14	AF=0.667	1/1/1	3	1	0.0471081	SLC39A14
8	22432377	C	7	A	10	AF=0.333	1/1/1	3	0.629059	0.0368036	SORBS3
8	22462852	T	30	C	46	AF=0.333	1/1/1	3	0.0846461	1.97101e-06	KIAA1967
8	22463623	C	307	T	297	AF=0.333	1/1/1	3	0.714245	1.05181e-15	KIAA1967
8	22489247	T	7	C	15	AF=0.333	1/1/1	3	0.133801	0.00100356	BIN3
8	22876739	C	7	T	3	AF=0.667	1/1/1	3	0.34375	0.0195481	BC043400, RHOBTB2
8	22880162	G	108	C	87	AF=0.333	1/1/1	3	0.151894	0.00104749	TNFRSF10B
8	23286234	G	11	A	3	AF=0.667	1/1/1	3	0.057373	0.000684325	ENTPD4
8	23291640	T	23	C	23	AF=0.667	1/1/1	3	1	0.0190054	ENTPD4
8	23387192	C	15	T	10	AF=0.667	1/1/1	3	0.424356	0.00908019	SLC25A37
8	23426319	T	46	C	48	AF=0.333	1/1/1	3	0.917923	0.000410218	SLC25A37
8	23427132	C	57	T	50	AF=0.667	1/1/1	3	0.562093	2.15575e-05	SLC25A37
8	23427919	T	16	C	14	AF=0.667	1/1/1	3	0.855536	0.0309569	AF116693, SLC25A37
8	25316789	A	90	G	99	AF=0.333	1/1/1	3	0.56074	7.09028e-08	CDCA2, PPP2R2A
8	25317572	T	3	C	11	AF=0.333	1/1/1	3	0.057373	0.000684325	CDCA2, PPP2R2A
8	26269412	C	36	T	42	AF=0.333	1/1/1	3	0.571587	0.000252292	BNIP3L
8	27297594	G	11	A	13	AF=0.333	1/1/1	3	0.83882	0.048265	PTK2B
8	27297625	G	13	C	11	AF=0.667	1/1/1	3	0.83882	0.048265	PTK2B
8	27303015	T	26	C	30	AF=0.333	1/1/1	3	0.68888	0.00252132	PTK2B
8	27307275	G	12	C	18	AF=0.333	1/1/1	3	0.361595	0.0030856	PTK2B
8	27308585	A	128	C	162	AF=0.667	1/1/1	3	0.0524568	0.00013576	PTK2B
8	27373865	G	73	A	57	AF=0.333	1/1/1	3	0.188107	0.0119804	EPHX2
8	27387015	C	10	T	7	AF=0.667	1/1/1	3	0.629059	0.0368036	EPHX2
8	27664043	A	11	G	4	AF=0.667	1/1/1	3	0.118469	0.0017905	ESCO2
8	27688390	G	6	A	15	AF=0.333	1/1/1	3	0.0783539	0.000602161	PBK
8	28203937	G	36	T	32	AF=0.333	1/1/1	3	0.716301	0.0200588	ZNF395
8	28609769	C	15	T	22	AF=0.333	1/1/1	3	0.324009	0.00133358	EXTL3
8	29922718	C	19	A	13	AF=0.667	1/1/1	3	0.377086	0.00397833	MIR548O2, TMEM66
8	37718468	C	121	T	152	AF=0.667	1/1/1	3	0.0692234	0.000183236	RAB11FIP1
8	38130433	C	6	A	15	AF=0.333	1/1/1	3	0.0783539	0.000602161	None
8	38684853	T	27	C	43	AF=0.333	1/1/1	3	0.0722379	1.56722e-06	TACC1
8	41395064	C	14	T	15	AF=0.333	1/1/1	3	1	0.0471081	GINS4
8	41513531	T	39	C	37	AF=0.667	1/1/1	3	0.908777	0.00138592	ANK1, NKX6-3
8	41657366	G	52	A	64	AF=0.333	1/1/1	3	0.30709	1.52053e-06	ANK1
8	41689070	G	2	A	8	AF=0.333	1/1/1	3	0.109375	0.00337964	ANK1
8	42026800	C	61	T	52	AF=0.333	1/1/1	3	0.451853	0.00507638	AP3M2
8	42391572	T	76	G	77	AF=0.333	1/1/1	3	1	1.49983e-05	SLC20A2
8	52730441	T	61	C	82	AF=0.333	1/1/1	3	0.0940833	4.09159e-09	PCMTD1
8	52734537	C	4	T	12	AF=0.333	1/1/1	3	0.0768127	0.000784383	PCMTD1
8	52769372	T	15	C	7	AF=0.667	1/1/1	3	0.133801	0.00100356	PCMTD1
8	55088048	T	27	C	17	AF=0.667	1/1/1	3	0.174171	0.000161563	None
8	56705818	A	16	G	10	AF=0.667	1/1/1	3	0.32694	0.00330628	TGS1
8	56725199	C	14	T	9	AF=0.667	1/1/1	3	0.404873	0.00725583	TGS1
8	57124329	T	9	C	16	AF=0.333	1/1/1	3	0.229523	0.00217053	CHCHD7
8	59497371	G	2	A	9	AF=0.333	1/1/1	3	0.0654297	0.0013606	NSMAF
8	59499237	G	5	A	9	AF=0.333	1/1/1	3	0.42395	0.0207631	NSMAF
8	61120869	G	24	A	20	AF=0.667	1/1/1	3	0.651588	0.00378769	CA8
8	61193828	A	122	G	146	AF=0.667	1/1/1	3	0.15991	4.03056e-05	CA8
8	63951312	A	144	G	161	AF=0.667	1/1/1	3	0.359606	5.3062e-07	GGH
8	75274141	T	14	G	15	AF=0.333	1/1/1	3	1	0.0471081	GDAP1
8	75711398	G	12	C	9	AF=0.667	1/1/1	3	0.663624	0.0339537	None
8	86130525	C	93	T	75	AF=0.333	1/1/1	3	0.189505	0.00236997	C8orf59
8	87571049	A	13	G	18	AF=0.333	1/1/1	3	0.47313	0.00643971	CPNE3
8	88883634	A	50	G	46	AF=0.333	1/1/1	3	0.759649	0.00327304	DCAF4L2
8	90716156	G	7	A	12	AF=0.333	1/1/1	3	0.359283	0.0121329	None
8	91445274	A	12	G	4	AF=0.667	1/1/1	3	0.0768127	0.000784383	None
8	91570362	A	9	G	4	AF=0.667	1/1/1	3	0.266846	0.0139305	None
8	91581975	A	21	G	16	AF=0.667	1/1/1	3	0.511376	0.0044591	None
8	91606848	A	12	G	8	AF=0.667	1/1/1	3	0.503445	0.0161994	None
8	91636668	C	21	T	17	AF=0.667	1/1/1	3	0.627103	0.00555837	TMEM64
8	92084808	T	11	C	8	AF=0.667	1/1/1	3	0.647606	0.0286644	OTUD6B
8	93876607	A	3	T	7	AF=0.333	1/1/1	3	0.34375	0.0195481	None
8	94746698	G	68	T	73	AF=0.333	1/1/1	3	0.736356	6.42069e-06	RBM12B
8	95888307	C	270	T	275	AF=0.667	1/1/1	3	0.863976	6.04003e-15	INTS8
8	98852986	G	8	A	13	AF=0.333	1/1/1	3	0.38331	0.00906972	LAPTM4B
8	98855825	C	18	T	32	AF=0.333	1/1/1	3	0.0649086	1.32148e-05	LAPTM4B
8	101726477	C	19	T	17	AF=0.667	1/1/1	3	0.867939	0.0200101	PABPC1
8	101726490	T	27	A	17	AF=0.667	1/1/1	3	0.174171	0.000161563	PABPC1
8	105600354	G	8	T	3	AF=0.667	1/1/1	3	0.226562	0.00876373	LRP12
8	105605910	C	9	T	5	AF=0.667	1/1/1	3	0.42395	0.0207631	None
8	106463270	C	14	T	11	AF=0.667	1/1/1	3	0.690038	0.019763	ZFPM2
8	107670090	T	11	G	3	AF=0.667	1/1/1	3	0.057373	0.000684325	OXR1
8	110587975	C	10	T	16	AF=0.333	1/1/1	3	0.32694	0.00330628	SYBU
8	124461878	T	11	A	6	AF=0.667	1/1/1	3	0.332306	0.00896458	None
8	124464083	A	11	C	3	AF=0.667	1/1/1	3	0.057373	0.000684325	None
8	125528135	G	313	A	338	AF=0.667	1/1/1	3	0.3469	8.64821e-15	TATDN1
8	126963335	G	210	A	195	AF=0.667	1/1/1	3	0.486685	2.17846e-14	LINC00861
8	128951805	C	23	T	13	AF=0.667	1/1/1	3	0.132498	0.000249756	PVT1
8	129108697	G	10	A	12	AF=0.333	1/1/1	3	0.831812	0.0418515	PVT1
8	129110299	C	19	G	21	AF=0.333	1/1/1	3	0.874629	0.0174576	PVT1
8	130024986	A	6	T	12	AF=0.333	1/1/1	3	0.237885	0.00456538	None
8	130228853	G	20	A	9	AF=0.667	1/1/1	3	0.0614283	0.000100593	LOC728724
8	130277408	C	39	G	34	AF=0.667	1/1/1	3	0.639973	0.000436349	None
8	130287026	C	14	T	5	AF=0.667	1/1/1	3	0.0635681	0.00037634	None
8	130325559	C	5	G	9	AF=0.333	1/1/1	3	0.42395	0.0207631	None
8	130411831	C	93	T	75	AF=0.667	1/1/1	3	0.189505	5.38497e-09	None
8	130474308	T	16	C	10	AF=0.667	1/1/1	3	0.32694	0.00330628	None
8	130584952	A	17	T	28	AF=0.333	1/1/1	3	0.135156	9.17263e-05	None
8	133858712	G	34	A	46	AF=0.333	1/1/1	3	0.218518	1.26877e-05	PHF20L1
8	141518515	C	10	G	18	AF=0.333	1/1/1	3	0.184933	0.000952335	None
8	141559358	G	88	A	96	AF=0.667	1/1/1	3	0.605943	5.81243e-05	AGO2
8	141639628	G	14	A	8	AF=0.667	1/1/1	3	0.286279	0.00507046	AGO2
8	142428554	G	9	A	3	AF=0.667	1/1/1	3	0.145996	0.00382585	AK311257
8	142441642	A	54	G	42	AF=0.667	1/1/1	3	0.261469	5.95077e-06	None
8	143359740	G	3	A	7	AF=0.333	1/1/1	3	0.34375	0.0195481	TSNARE1
8	143739162	C	43	T	27	AF=0.667	1/1/1	3	0.0722379	1.56722e-06	JRK
8	143739731	A	57	T	74	AF=0.667	1/1/1	3	0.161882	0.0157032	JRK
8	143742683	C	37	T	39	AF=0.667	1/1/1	3	0.908777	0.00694572	JH8, JRK
8	143747271	C	37	G	38	AF=0.667	1/1/1	3	1	0.00453662	JRK
8	143747752	T	86	G	86	AF=0.667	1/1/1	3	1	7.02218e-06	JRK
8	143750801	C	3	T	9	AF=0.333	1/1/1	3	0.145996	0.00382585	JRK
8	143808951	C	122	T	107	AF=0.667	1/1/1	3	0.354916	6.01751e-10	THEM6
8	143809193	C	60	T	50	AF=0.667	1/1/1	3	0.390927	6.0049e-06	THEM6
8	144102747	C	558	T	555	AF=0.333	1/1/1	3	0.9522	5.44159e-30	LY6E
8	144330452	A	11	G	13	AF=0.333	1/1/1	3	0.83882	0.048265	ZFP41
8	144333315	G	42	A	42	AF=0.333	1/1/1	3	1	0.00165107	ZFP41
8	144353394	A	28	G	26	AF=0.333	1/1/1	3	0.891923	0.029187	GLI4, ZFP41
8	144355479	A	20	G	20	AF=0.333	1/1/1	3	1	0.0292281	GLI4, ZFP41
8	144357213	G	19	C	28	AF=0.333	1/1/1	3	0.24296	0.000269709	GLI4, ZFP41
8	144357992	A	24	G	35	AF=0.333	1/1/1	3	0.192526	4.49625e-05	GLI4, ZFP41
8	144520147	G	22	A	25	AF=0.333	1/1/1	3	0.770867	0.00508924	ZC3H3
8	144620871	A	55	G	62	AF=0.333	1/1/1	3	0.57929	1.25425e-05	ZC3H3
8	144655315	A	12	C	9	AF=0.667	1/1/1	3	0.663624	0.0339537	None
8	144664319	C	23	G	14	AF=0.667	1/1/1	3	0.187742	0.000361318	EEF1D
8	144664808	C	10	T	4	AF=0.667	1/1/1	3	0.179565	0.00400617	EEF1D
8	144664975	G	6	C	11	AF=0.333	1/1/1	3	0.332306	0.00896458	EEF1D
8	144673097	G	23	A	22	AF=0.333	1/1/1	3	1	0.0382771	EEF1D
8	144673722	C	36	A	37	AF=0.667	1/1/1	3	1	0.00584747	EEF1D
8	144676234	G	34	C	45	AF=0.333	1/1/1	3	0.260426	2.01019e-05	EEF1D
8	144690648	G	5	C	9	AF=0.333	1/1/1	3	0.42395	0.0207631	PYCRL
8	144718254	G	8	C	3	AF=0.667	1/1/1	3	0.226562	0.00876373	ZNF623
8	144732450	G	36	A	36	AF=0.333	1/1/1	3	1	0.0037568	ZNF623
8	144806171	C	19	G	28	AF=0.333	1/1/1	3	0.24296	0.000269709	FAM83H
8	144807744	G	76	A	66	AF=0.667	1/1/1	3	0.450208	1.04828e-06	FAM83H
8	144808747	G	60	A	61	AF=0.667	1/1/1	3	1	0.00022325	FAM83H
8	144825035	T	15	G	13	AF=0.667	1/1/1	3	0.850554	0.0275116	AX746851, LOC100128338
8	144887734	G	3	A	8	AF=0.333	1/1/1	3	0.226562	0.00876373	SCRIB
8	144893084	G	125	A	129	AF=0.667	1/1/1	3	0.850738	1.66423e-07	SCRIB
8	145158607	G	78	A	72	AF=0.333	1/1/1	3	0.683232	0.00024514	SHARPIN
8	145686313	C	24	T	23	AF=0.667	1/1/1	3	1	0.0127477	CYHR1
8	145703508	G	42	A	46	AF=0.333	1/1/1	3	0.749329	0.000258301	None
8	145706276	G	12	A	6	AF=0.667	1/1/1	3	0.237885	0.00456538	None
8	145737514	G	28	A	27	AF=0.667	1/1/1	3	1	0.00925354	RECQL4
8	145756170	G	19	A	22	AF=0.333	1/1/1	3	0.755229	0.00761364	ARHGAP39
8	145948440	T	10	C	6	AF=0.667	1/1/1	3	0.454498	0.0173614	ZNF251
8	145977731	T	15	C	8	AF=0.667	1/1/1	3	0.21004	0.00285358	ZNF251
8	146014740	C	13	T	7	AF=0.667	1/1/1	3	0.263176	0.00399148	None
8	146035358	A	22	G	12	AF=0.667	1/1/1	3	0.121449	0.000195692	ZNF517
8	146068710	T	9	C	15	AF=0.333	1/1/1	3	0.307456	0.00397488	COMMD5, ZNF7
9	37780980	G	16	T	15	AF=0.25	0/1/1	4	1	0.0056249	EXOSC3
9	133645683	C	12	T	5	AF=0.667	0/1/1	3	0.143463	0.00288012	ABL1
9	134016280	C	20	T	20	AF=0.333	0/1/1	3	1	0.0292281	NUP214
9	134016557	T	54	C	43	AF=0.333	0/1/1	3	0.309934	0.023653	NUP214
9	134313267	C	4	G	11	AF=0.333	0/1/1	3	0.118469	0.0017905	PRRC2B
9	134497322	G	80	C	71	AF=0.333	0/1/1	3	0.515163	0.000513882	RAPGEF1
9	139721164	G	8	A	13	AF=0.333	0/1/1	3	0.38331	0.00906972	RABL6
10	3162563	G	17	T	19	AF=0.333	0/1	3	0.867939	0.0200101	PFKP
10	5522392	C	37	T	35	AF=0.333	0/1	3	0.906294	0.00818499	None
10	5524502	C	28	A	21	AF=0.667	0/1	3	0.391603	0.000695953	None
10	5525451	C	10	T	13	AF=0.333	0/1	3	0.677639	0.0252846	None
10	5681783	C	57	T	73	AF=0.333	0/1	3	0.188107	1.08532e-07	ASB13
10	5936425	C	20	G	14	AF=0.667	0/1	3	0.391528	0.00292153	FBXO18
10	5939358	C	10	T	5	AF=0.667	0/1	3	0.301758	0.0107384	FBXO18
10	5942711	G	15	A	11	AF=0.667	0/1	3	0.557197	0.0116391	FBXO18
10	5967158	C	19	T	21	AF=0.333	0/1	3	0.874629	0.0174576	FBXO18
10	6019798	T	20	C	17	AF=0.667	0/1	3	0.742829	0.0132397	IL15RA
10	11912431	C	14	T	25	AF=0.333	0/1	3	0.108129	0.000109264	PROSER2, PROSER2-AS1
10	12139884	C	8	T	16	AF=0.333	0/1	3	0.15159	0.000908996	DHTKD1
10	12207887	A	97	T	116	AF=0.667	0/1	3	0.217356	0.000257301	SEC61A2
10	12208307	G	37	A	47	AF=0.667	0/1	3	0.326134	0.0482453	SEC61A2
10	12209399	C	19	G	16	AF=0.667	0/1	3	0.735879	0.0113954	SEC61A2
10	12211590	T	25	C	23	AF=0.667	0/1	3	0.885433	0.00851949	NUDT5, SEC61A2
10	13687053	G	13	A	18	AF=0.333	0/1	3	0.47313	0.00643971	FRMD4A, PRPF18
10	14227550	G	24	A	15	AF=0.667	0/1	3	0.199591	0.000466529	FRMD4A
10	14888274	G	49	A	65	AF=0.667	0/1	3	0.159762	0.0363361	HSPA14
10	14952792	A	29	C	28	AF=0.333	0/1	3	1	0.0160482	DCLRE1C
10	15139633	C	121	T	101	AF=0.333	0/1	3	0.202134	0.000196775	RPP38
10	15148148	A	15	G	17	AF=0.333	0/1	3	0.86005	0.0232719	NMT2
10	16547058	A	63	G	71	AF=0.667	0/1	3	0.545534	0.00123927	PTER
10	17276066	C	7	T	3	AF=0.667	0/1	3	0.34375	0.0195481	VIM
10	17279517	C	218	T	253	AF=0.667	0/1	3	0.117105	6.40842e-09	VIM
10	17483187	C	5	G	9	AF=0.333	0/1	3	0.42395	0.0207631	ST8SIA6
10	17487890	G	27	A	31	AF=0.667	0/1	3	0.694004	0.03662	ST8SIA6
10	17603955	T	10	G	3	AF=0.667	0/1	3	0.0922852	0.00163342	None
10	17756596	T	110	C	85	AF=0.333	0/1	3	0.0854116	0.00295618	STAM
10	18969812	A	80	G	63	AF=0.667	0/1	3	0.180701	3.4488e-08	AK022915
10	21074455	T	9	C	12	AF=0.333	0/1	3	0.663624	0.0339537	NEBL
10	21108247	C	15	T	9	AF=0.667	0/1	3	0.307456	0.00397488	NEBL
10	22498209	A	17	G	27	AF=0.333	0/1	3	0.174171	0.000161563	EBLN1
10	25769785	G	22	A	22	AF=0.667	0/1	3	1	0.0242901	GPR158
10	26933906	C	2	A	9	AF=0.333	0/1	3	0.0654297	0.0013606	LINC00202-2
10	26952255	G	74	A	66	AF=0.333	0/1	3	0.554269	0.000835819	None
10	26954790	T	21	C	26	AF=0.333	0/1	3	0.560065	0.0027818	None
10	26954800	T	29	C	26	AF=0.333	0/1	3	0.787706	0.0318678	None
10	26955414	C	62	A	54	AF=0.333	0/1	3	0.515913	0.00305022	None
10	26956129	T	19	C	32	AF=0.333	0/1	3	0.0919145	1.91459e-05	None
10	27474288	G	24	A	13	AF=0.667	0/1	3	0.0988717	0.000142636	MASTL
10	27475444	T	28	C	27	AF=0.667	0/1	3	1	0.00925354	MASTL
10	29709848	T	41	C	53	AF=0.333	0/1	3	0.256442	4.93966e-06	PTCHD3P1
10	29709886	G	47	A	58	AF=0.333	0/1	3	0.329137	5.814e-06	PTCHD3P1
10	29715461	C	3	T	10	AF=0.333	0/1	3	0.0922852	0.00163342	PTCHD3P1
10	30723593	G	11	A	19	AF=0.333	0/1	3	0.200488	0.000811461	MAP3K8
10	30728250	A	20	G	29	AF=0.333	0/1	3	0.25287	0.000217086	MAP3K8
10	35622558	G	4	C	8	AF=0.333	0/1	3	0.387695	0.0263932	CCNY
10	38117977	T	13	C	11	AF=0.667	0/1	3	0.83882	0.048265	ZNF248
11	207462	A	6	G	12	AF=0.333	1/1/1	3	0.237885	0.00456538	None
11	208609	G	63	A	87	AF=0.667	1/1/1	3	0.0600272	0.0299213	RIC8A
11	235760	A	8	G	13	AF=0.333	1/1/1	3	0.38331	0.00906972	SIRT3
11	246370	C	6	T	14	AF=0.333	1/1/1	3	0.115318	0.00117265	PSMD13
11	248077	C	14	T	5	AF=0.667	1/1/1	3	0.0635681	0.00037634	PSMD13
11	252231	C	13	G	15	AF=0.333	1/1/1	3	0.850554	0.0275116	PSMD13
11	317137	G	10	T	12	AF=0.333	1/1/1	3	0.831812	0.0418515	None
11	377712	C	15	A	9	AF=0.667	1/1/1	3	0.307456	0.00397488	B4GALNT4
11	396701	C	9	T	14	AF=0.333	1/1/1	3	0.404873	0.00725583	PKP3
11	499412	G	41	T	54	AF=0.667	1/1/1	3	0.218054	0.0495175	RNH1
11	676486	C	10	T	5	AF=0.667	1/1/1	3	0.301758	0.0107384	DEAF1
11	721570	C	28	T	25	AF=0.333	1/1/1	3	0.783846	0.040426	EPS8L2
11	758806	C	18	T	14	AF=0.667	1/1/1	3	0.596615	0.00810101	TALDO1
11	780827	C	38	T	42	AF=0.333	1/1/1	3	0.737554	0.000492954	None
11	791009	C	106	T	108	AF=0.333	1/1/1	3	0.945521	2.84326e-07	SLC25A22
11	802379	T	97	C	106	AF=0.333	1/1/1	3	0.574572	3.59904e-08	PIDD
11	804212	C	124	A	157	AF=0.333	1/1/1	3	0.0560738	9.86891e-15	PIDD
11	822389	C	13	T	22	AF=0.333	1/1/1	3	0.175465	0.000443023	PNPLA2
11	1296263	G	46	C	46	AF=0.333	1/1/1	3	1	0.0011953	TOLLIP
11	1297350	G	18	A	18	AF=0.667	1/1/1	3	1	0.0497778	TOLLIP
11	1784133	G	4	A	8	AF=0.333	1/1/1	3	0.387695	0.0263932	CTSD, MOB2
11	1975919	G	16	A	14	AF=0.667	1/1/1	3	0.855536	0.0309569	MRPL23
11	2016924	A	40	G	52	AF=0.333	1/1/1	3	0.251322	6.35447e-06	AK311497, H19
11	2967901	C	49	T	53	AF=0.667	1/1/1	3	0.766604	0.00218628	NAP1L4
11	3013287	C	23	G	22	AF=0.333	1/1/1	3	1	0.0382771	NAP1L4
11	3049843	A	11	C	13	AF=0.333	1/1/1	3	0.83882	0.048265	CARS
11	3118835	C	3	T	9	AF=0.333	1/1/1	3	0.145996	0.00382585	OSBPL5
11	3118991	C	2	T	9	AF=0.333	1/1/1	3	0.0654297	0.0013606	OSBPL5
11	3128182	T	22	C	27	AF=0.333	1/1/1	3	0.568172	0.00207526	OSBPL5
11	3128294	C	16	T	24	AF=0.333	1/1/1	3	0.268187	0.000614198	OSBPL5
11	3129139	C	6	T	15	AF=0.333	1/1/1	3	0.0783539	0.000602161	OSBPL5
11	3140627	C	10	T	4	AF=0.667	1/1/1	3	0.179565	0.00400617	OSBPL5
11	3163724	C	3	A	11	AF=0.333	1/1/1	3	0.057373	0.000684325	OSBPL5
11	3436095	G	34	A	22	AF=0.667	1/1/1	3	0.140895	4.46811e-05	None
11	3847261	C	100	T	103	AF=0.667	1/1/1	3	0.888411	3.15767e-06	PGAP2
11	4113395	G	105	A	107	AF=0.667	1/1/1	3	0.945266	1.20835e-06	STIM1
11	4414873	G	24	A	19	AF=0.667	1/1/1	3	0.542384	0.00305132	TRIM21
11	5269140	C	63	A	49	AF=0.333	1/1/1	3	0.219131	0.021091	None
11	5293113	T	5	C	8	AF=0.333	1/1/1	3	0.581055	0.0396204	HBE1, HBG2
11	5319916	G	34	A	35	AF=0.333	1/1/1	3	1	0.0030622	HBE1, HBG2
11	5321686	G	116	A	123	AF=0.333	1/1/1	3	0.698022	8.21774e-09	HBE1, HBG2
11	5327480	G	12	T	20	AF=0.333	1/1/1	3	0.215327	0.00100806	HBE1, HBG2
11	5470923	G	11	T	7	AF=0.667	1/1/1	3	0.480682	0.0211367	HBE1, HBG2, OR51B5
11	5479908	C	12	A	5	AF=0.667	1/1/1	3	0.143463	0.00288012	HBE1, HBG2, OR51B5
11	5479984	A	12	G	5	AF=0.667	1/1/1	3	0.143463	0.00288012	HBE1, HBG2, OR51B5
11	5480110	A	13	C	6	AF=0.667	1/1/1	3	0.167068	0.00231089	HBE1, HBG2, OR51B5
11	5480123	T	13	C	6	AF=0.667	1/1/1	3	0.167068	0.00231089	HBE1, HBG2, OR51B5
11	5481856	T	9	G	3	AF=0.667	1/1/1	3	0.145996	0.00382585	HBE1, HBG2, OR51B5
11	5492033	C	14	G	6	AF=0.667	1/1/1	3	0.115318	0.00117265	HBE1, HBG2, OR51B5
11	5509381	G	15	A	6	AF=0.667	1/1/1	3	0.0783539	0.000602161	HBE1, HBG2, OR51B5
11	5632867	G	22	A	36	AF=0.333	1/1/1	3	0.0869489	8.795e-06	HBG2, TRIM6, TRIM6-TRIM34
11	6502727	C	62	G	71	AF=0.667	1/1/1	3	0.488022	0.00165205	TIMM10B
11	6507631	T	27	C	20	AF=0.667	1/1/1	3	0.381693	0.000906033	None
11	6507680	A	31	G	21	AF=0.667	1/1/1	3	0.211609	0.000161281	None
11	6515986	G	32	T	28	AF=0.667	1/1/1	3	0.698883	0.00147504	None
11	6520859	A	9	G	4	AF=0.667	1/1/1	3	0.266846	0.0139305	DNHD1
11	6576811	C	3	G	7	AF=0.333	1/1/1	3	0.34375	0.0195481	DNHD1
11	6617863	A	13	C	5	AF=0.667	1/1/1	3	0.0962524	0.00152619	None
11	6626049	G	14	A	7	AF=0.667	1/1/1	3	0.189247	0.00201017	ILK
11	6626072	C	15	A	7	AF=0.667	1/1/1	3	0.133801	0.00100356	ILK
11	6629530	G	17	A	7	AF=0.667	1/1/1	3	0.0639147	0.000250307	ILK
11	6630833	G	192	A	206	AF=0.667	1/1/1	3	0.51469	9.68927e-10	ILK
11	6718915	T	21	C	10	AF=0.667	1/1/1	3	0.0707555	0.000150787	None
11	6769449	T	21	C	11	AF=0.667	1/1/1	3	0.110184	0.000224731	None
11	6947761	T	28	A	27	AF=0.333	1/1/1	3	1	0.0150622	ZNF215
11	8710244	G	58	T	61	AF=0.667	1/1/1	3	0.85463	0.000596979	RPL27A
11	9160708	G	114	A	104	AF=0.333	1/1/1	3	0.542253	1.39311e-05	DENND5A
11	9168118	A	18	G	18	AF=0.333	1/1/1	3	1	0.0497778	DENND5A
11	9241742	T	6	G	14	AF=0.333	1/1/1	3	0.115318	0.00117265	DENND5A
11	9309405	A	58	G	50	AF=0.333	1/1/1	3	0.500766	0.00560042	TMEM41B
11	9312287	T	4	C	11	AF=0.333	1/1/1	3	0.118469	0.0017905	TMEM41B
11	9453957	C	15	A	7	AF=0.667	1/1/1	3	0.133801	0.00100356	IPO7
11	9602282	C	18	T	28	AF=0.333	1/1/1	3	0.183925	0.00013436	WEE1
11	9606676	A	4	G	11	AF=0.333	1/1/1	3	0.118469	0.0017905	WEE1
11	10821055	C	10	T	17	AF=0.333	1/1/1	3	0.247789	0.00177901	EIF4G2
11	10822202	G	30	A	44	AF=0.333	1/1/1	3	0.130178	5.25141e-06	EIF4G2
11	10823079	T	12	C	22	AF=0.333	1/1/1	3	0.121449	0.000195692	EIF4G2, SNORD97
11	10824731	C	21	T	21	AF=0.333	1/1/1	3	1	0.0317895	EIF4G2
11	10827418	T	7	C	17	AF=0.333	1/1/1	3	0.0639147	0.000250307	EIF4G2
11	10835878	T	11	C	8	AF=0.667	1/1/1	3	0.647606	0.0286644	BC026354, ZBED5
11	10877121	T	37	C	47	AF=0.667	1/1/1	3	0.326134	0.0482453	ZBED5
11	13009700	A	7	G	17	AF=0.333	1/1/1	3	0.0639147	0.000250307	LOC100506305
11	14521354	C	186	A	216	AF=0.667	1/1/1	3	0.147977	7.61845e-08	COPB1, PSMA1
11	14912417	T	76	C	60	AF=0.667	1/1/1	3	0.198181	7.66117e-08	CYP2R1
11	16772357	G	17	A	20	AF=0.333	1/1/1	3	0.742829	0.0132397	C11orf58
11	17111272	A	38	G	46	AF=0.667	1/1/1	3	0.445205	0.02713	PIK3C2A
11	17298365	G	129	C	162	AF=0.667	1/1/1	3	0.0604865	0.000107323	NUCB2
11	17366158	G	9	C	12	AF=0.333	1/1/1	3	0.663624	0.0339537	AK096475, NUCB2
11	17394073	C	71	G	61	AF=0.333	1/1/1	3	0.433537	0.00220626	NCR3LG1
11	31517087	C	14	T	5	AF=0.667	1/1/1	3	0.0635681	0.00037634	IMMP1L
11	32457675	A	15	G	21	AF=0.333	1/1/1	3	0.405032	0.0022714	WT1-AS
11	33037466	G	85	T	95	AF=0.667	1/1/1	3	0.502445	0.000131941	DEPDC7
11	33051748	T	22	C	11	AF=0.667	1/1/1	3	0.0801433	0.00011855	DEPDC7
11	33051784	G	20	A	18	AF=0.667	1/1/1	3	0.871415	0.0152318	DEPDC7
11	33113378	C	13	T	5	AF=0.667	1/1/1	3	0.0962524	0.00152619	CSTF3, TCP11L1
11	33161635	T	20	C	22	AF=0.333	1/1/1	3	0.877614	0.0130199	CSTF3
11	33182634	G	29	A	34	AF=0.667	1/1/1	3	0.614655	0.0438646	CSTF3
11	33727515	T	61	C	77	AF=0.667	1/1/1	3	0.201473	0.00856465	CD59
11	33792951	C	8	T	3	AF=0.667	1/1/1	3	0.226562	0.00876373	FBXO3
11	33882227	G	28	A	27	AF=0.667	1/1/1	3	1	0.00925354	LMO2
11	34084758	G	10	A	4	AF=0.667	1/1/1	3	0.179565	0.00400617	CAPRIN1
11	34105869	G	19	A	9	AF=0.667	1/1/1	3	0.0871586	0.000206176	CAPRIN1
11	34114354	A	12	G	4	AF=0.667	1/1/1	3	0.0768127	0.000784383	CAPRIN1
11	34115613	G	19	A	11	AF=0.667	1/1/1	3	0.200488	0.000811461	CAPRIN1
11	34129399	C	7	A	3	AF=0.667	1/1/1	3	0.34375	0.0195481	NAT10
11	36133269	T	3	C	8	AF=0.333	1/1/1	3	0.226562	0.00876373	LDLRAD3
11	36616112	G	35	C	40	AF=0.333	1/1/1	3	0.644464	0.000500515	C11orf74, RAG2
11	36618389	G	6	T	13	AF=0.333	1/1/1	3	0.167068	0.00231089	C11orf74, RAG2
11	43670501	C	3	A	9	AF=0.333	1/1/1	3	0.145996	0.00382585	None
11	45952311	A	8	G	14	AF=0.333	1/1/1	3	0.286279	0.00507046	PHF21A
11	45968661	A	9	T	13	AF=0.333	1/1/1	3	0.523467	0.0208981	PHF21A
11	46135655	C	4	T	12	AF=0.333	1/1/1	3	0.0768127	0.000784383	PHF21A
11	47187067	G	17	A	9	AF=0.667	1/1/1	3	0.168638	0.00118986	ARFGAP2
11	47191321	G	41	A	48	AF=0.333	1/1/1	3	0.525015	6.72085e-05	ARFGAP2
11	47437202	C	44	T	45	AF=0.667	1/1/1	3	1	0.00217889	SLC39A13
11	48191439	C	19	T	8	AF=0.667	1/1/1	3	0.052239	0.000108734	PTPRJ
11	57157405	A	96	G	124	AF=0.333	1/1/1	3	0.068464	2.566e-12	PRG2
11	57176332	C	40	T	52	AF=0.667	1/1/1	3	0.251322	0.0459186	PRG2, SLC43A3
11	57176628	C	35	T	24	AF=0.667	1/1/1	3	0.192526	4.49625e-05	PRG2, SLC43A3
11	57252328	G	91	A	78	AF=0.333	1/1/1	3	0.356004	0.000570319	SLC43A1
11	57283056	G	74	C	92	AF=0.667	1/1/1	3	0.186854	0.0029045	SLC43A1
11	57508678	G	32	C	32	AF=0.667	1/1/1	3	1	0.00740581	TMX2-CTNND1
11	59830198	T	7	C	10	AF=0.333	1/1/1	3	0.629059	0.0368036	MS4A3
11	60617913	A	151	G	173	AF=0.667	1/1/1	3	0.243302	8.44175e-07	CCDC86
11	61179728	G	6	A	13	AF=0.333	1/1/1	3	0.167068	0.00231089	CPSF7
11	61204361	A	16	C	17	AF=0.333	1/1/1	3	1	0.0401064	SDHAF2
11	61560261	C	20	T	12	AF=0.667	1/1/1	3	0.215327	0.00100806	FEN1
11	61664992	T	90	C	91	AF=0.333	1/1/1	3	1	2.64117e-06	RAB3IL1
11	61909620	T	8	C	3	AF=0.667	1/1/1	3	0.226562	0.00876373	INCENP
11	61916718	C	15	T	8	AF=0.667	1/1/1	3	0.21004	0.00285358	INCENP
11	62158051	T	5	A	10	AF=0.333	1/1/1	3	0.301758	0.0107384	ASRGL1
11	62159926	G	37	A	38	AF=0.333	1/1/1	3	1	0.00202978	ASRGL1
11	62160723	C	28	T	33	AF=0.333	1/1/1	3	0.608921	0.00095262	ASRGL1
11	62160729	G	29	A	32	AF=0.333	1/1/1	3	0.798153	0.00248229	ASRGL1
11	62430335	G	151	A	154	AF=0.667	1/1/1	3	0.90885	5.6894e-09	C11orf48
11	62430659	T	33	A	33	AF=0.667	1/1/1	3	1	0.00569873	C11orf48
11	62438498	G	56	T	74	AF=0.333	1/1/1	3	0.135656	3.73838e-08	C11orf48
11	62458275	T	193	C	162	AF=0.333	1/1/1	3	0.111203	1.50512e-06	BSCL2, HNRNPUL2-BSCL2
11	62529532	G	17	A	15	AF=0.667	1/1/1	3	0.86005	0.0232719	POLR2G
11	62564413	C	26	T	29	AF=0.333	1/1/1	3	0.787706	0.00375261	NXF1
11	63595072	C	22	A	26	AF=0.333	1/1/1	3	0.665466	0.00325014	AK092098, C11orf84
11	63917601	G	14	T	7	AF=0.667	1/1/1	3	0.189247	0.00201017	MACROD1
11	63961242	G	10	A	14	AF=0.333	1/1/1	3	0.541256	0.0151579	STIP1
11	63986713	C	11	A	19	AF=0.333	1/1/1	3	0.200488	0.000811461	FERMT3
11	63991801	T	95	C	78	AF=0.333	1/1/1	3	0.223705	0.00156865	TRPT1
11	63999529	C	12	T	9	AF=0.667	1/1/1	3	0.663624	0.0339537	DNAJC4
11	64003843	G	60	T	50	AF=0.333	1/1/1	3	0.390927	0.00835182	VEGFB
11	64004692	C	109	T	122	AF=0.333	1/1/1	3	0.429859	1.1674e-09	VEGFB
11	64005412	G	8	A	4	AF=0.667	1/1/1	3	0.387695	0.0263932	VEGFB
11	64023971	G	44	A	50	AF=0.667	1/1/1	3	0.606296	0.00821769	PLCB3
11	64034866	G	113	A	99	AF=0.333	1/1/1	3	0.37198	5.57843e-05	PLCB3
11	64546891	G	22	A	22	AF=0.667	1/1/1	3	1	0.0242901	None
11	64573589	T	26	C	21	AF=0.667	1/1/1	3	0.560065	0.0027818	MEN1
11	64591679	G	17	A	14	AF=0.667	1/1/1	3	0.7201	0.0203061	CDC42BPG
11	64606177	C	40	T	35	AF=0.667	1/1/1	3	0.644464	0.000500515	CDC42BPG
11	64621573	G	42	A	51	AF=0.333	1/1/1	3	0.406924	2.19653e-05	EHD1
11	65740370	C	9	T	3	AF=0.667	1/1/1	3	0.145996	0.00382585	SART1
11	65765866	C	23	G	35	AF=0.333	1/1/1	3	0.148006	3.30546e-05	EIF1AD
11	65770413	G	20	A	18	AF=0.667	1/1/1	3	0.871415	0.0152318	BANF1
11	67197757	A	6	G	14	AF=0.333	1/1/1	3	0.115318	0.00117265	RPS6KB2
11	67199706	C	19	A	23	AF=0.333	1/1/1	3	0.643969	0.00482068	RPS6KB2
11	67385261	C	13	T	9	AF=0.667	1/1/1	3	0.523467	0.0208981	None
11	67387977	G	7	A	14	AF=0.333	1/1/1	3	0.189247	0.00201017	None
11	68704028	C	43	T	51	AF=0.667	1/1/1	3	0.470492	0.0118493	IGHMBP2
11	69174982	A	11	G	14	AF=0.333	1/1/1	3	0.690038	0.019763	None
11	69174986	G	11	T	14	AF=0.333	1/1/1	3	0.690038	0.019763	None
11	69184124	A	15	G	16	AF=0.333	1/1/1	3	1	0.0361149	None
11	69466115	C	13	A	5	AF=0.667	1/1/1	3	0.0962524	0.00152619	CCND1
11	69466737	C	42	G	31	AF=0.667	1/1/1	3	0.241645	2.82256e-05	CCND1
11	69482091	C	47	A	58	AF=0.667	1/1/1	3	0.329137	0.0167776	ORAOV1
11	70255509	C	10	T	7	AF=0.667	1/1/1	3	0.629059	0.0368036	CTTN
11	71725513	C	80	T	81	AF=0.333	1/1/1	3	1	1.10637e-05	NUMA1
11	72424634	T	7	C	12	AF=0.333	1/1/1	3	0.359283	0.0121329	ARAP1
11	74043171	A	4	G	9	AF=0.333	1/1/1	3	0.266846	0.0139305	PGM2L1
11	74167630	A	46	G	59	AF=0.667	1/1/1	3	0.241432	0.0290943	KCNE3
11	74550956	A	45	G	37	AF=0.667	1/1/1	3	0.439705	8.36873e-05	RNF169, XRRA1
11	74551025	C	34	A	34	AF=0.667	1/1/1	3	1	0.00448388	RNF169, XRRA1
11	74713888	C	15	A	6	AF=0.667	1/1/1	3	0.0783539	0.000602161	NEU3
11	75160575	G	28	A	35	AF=0.333	1/1/1	3	0.449963	0.000402025	GDPD5
11	75162036	G	8	C	4	AF=0.667	1/1/1	3	0.387695	0.0263932	GDPD5
11	75162041	G	8	A	4	AF=0.667	1/1/1	3	0.387695	0.0263932	GDPD5
11	75167383	G	18	T	20	AF=0.333	1/1/1	3	0.871415	0.0152318	GDPD5
11	75190413	G	27	A	28	AF=0.667	1/1/1	3	1	0.0150622	GDPD5
11	76261533	A	34	G	34	AF=0.333	1/1/1	3	1	0.00448388	C11orf30
11	77372165	A	6	C	12	AF=0.333	1/1/1	3	0.237885	0.00456538	None
11	77525203	G	20	A	23	AF=0.333	1/1/1	3	0.760792	0.00866469	RSF1
11	77853010	C	35	T	34	AF=0.667	1/1/1	3	1	0.0030622	LOC100289388
11	77920563	G	25	T	22	AF=0.667	1/1/1	3	0.770867	0.00508924	USP35
11	77926769	A	30	G	36	AF=0.667	1/1/1	3	0.538583	0.0490563	GAB2
11	77937800	G	56	A	39	AF=0.667	1/1/1	3	0.100173	3.23033e-07	GAB2
11	78071876	A	12	G	6	AF=0.667	1/1/1	3	0.237885	0.00456538	GAB2
11	78124797	G	11	A	5	AF=0.667	1/1/1	3	0.210114	0.00553862	GAB2
11	78128775	C	26	T	17	AF=0.667	1/1/1	3	0.222053	0.000285787	GAB2
11	78135229	C	20	T	15	AF=0.667	1/1/1	3	0.49956	0.00386216	None
11	78173439	C	11	A	7	AF=0.667	1/1/1	3	0.480682	0.0211367	NARS2
11	78277253	C	76	T	75	AF=0.667	1/1/1	3	1	1.90578e-05	NARS2
11	82879825	G	103	A	126	AF=0.333	1/1/1	3	0.145838	1.94109e-11	PCF11
11	82926035	G	27	A	27	AF=0.333	1/1/1	3	1	0.0132967	ANKRD42
11	82996881	C	69	T	59	AF=0.333	1/1/1	3	0.426439	0.00263245	CCDC90B
11	82996986	A	148	C	124	AF=0.333	1/1/1	3	0.163021	2.66946e-05	CCDC90B
11	85707795	A	3	G	7	AF=0.333	1/1/1	3	0.34375	0.0195481	PICALM
11	86657520	A	45	G	37	AF=0.667	1/1/1	3	0.439705	8.36873e-05	FZD4, PRSS23
11	88019976	C	8	T	4	AF=0.667	1/1/1	3	0.387695	0.0263932	None
11	88024313	C	15	T	14	AF=0.667	1/1/1	3	1	0.0471081	None
11	88026166	C	9	A	4	AF=0.667	1/1/1	3	0.266846	0.0139305	None
11	88029893	T	6	A	10	AF=0.333	1/1/1	3	0.454498	0.0173614	CTSC
11	89928611	T	18	G	19	AF=0.333	1/1/1	3	1	0.0234257	None
11	89928637	A	17	G	19	AF=0.333	1/1/1	3	0.867939	0.0200101	None
11	93454524	T	61	C	47	AF=0.333	1/1/1	3	0.210766	0.0314554	KIAA1731
11	93476766	G	14	A	10	AF=0.667	1/1/1	3	0.541256	0.0151579	C11orf54
11	93478133	T	9	G	12	AF=0.333	1/1/1	3	0.663624	0.0339537	C11orf54
11	93538992	T	15	C	7	AF=0.667	1/1/1	3	0.133801	0.00100356	MED17
11	93544175	C	12	T	6	AF=0.667	1/1/1	3	0.237885	0.00456538	MED17
11	93914451	G	20	A	31	AF=0.333	1/1/1	3	0.16078	7.27622e-05	PANX1
11	93914956	A	40	G	41	AF=0.333	1/1/1	3	1	0.00134998	PANX1
11	94233959	C	8	A	4	AF=0.667	1/1/1	3	0.387695	0.0263932	None
11	94282014	G	40	A	33	AF=0.333	1/1/1	3	0.482789	0.0347327	FUT4, PIWIL4
11	94380544	A	3	G	8	AF=0.333	1/1/1	3	0.226562	0.00876373	None
11	94533373	C	31	T	35	AF=0.333	1/1/1	3	0.712231	0.00099449	AMOTL1
11	94703480	T	30	C	37	AF=0.333	1/1/1	3	0.463818	0.000238487	CWC15
11	94703564	T	33	C	29	AF=0.667	1/1/1	3	0.703537	0.00167063	CWC15
11	94802620	C	52	A	62	AF=0.667	1/1/1	3	0.399373	0.00703089	SRSF8
11	94802776	G	53	C	63	AF=0.667	1/1/1	3	0.40347	0.00568232	SRSF8
11	95528891	G	22	T	11	AF=0.667	1/1/1	3	0.0801433	0.00011855	CEP57
11	95711032	G	23	T	30	AF=0.333	1/1/1	3	0.410103	0.000633933	None
11	95711448	T	14	G	16	AF=0.333	1/1/1	3	0.855536	0.0309569	MAML2
11	102925714	G	8	A	15	AF=0.333	1/1/1	3	0.21004	0.00285358	DCUN1D5
11	102959765	A	14	G	7	AF=0.667	1/1/1	3	0.189247	0.00201017	DCUN1D5
11	105038988	T	8	G	4	AF=0.667	1/1/1	3	0.387695	0.0263932	None
11	107420530	A	21	G	34	AF=0.333	1/1/1	3	0.104789	1.92149e-05	ALKBH8
11	108379649	T	30	C	29	AF=0.667	1/1/1	3	1	0.00551333	EXPH5
11	108463643	C	31	G	31	AF=0.667	1/1/1	3	1	0.00678726	EXPH5
11	108464209	T	26	C	13	AF=0.667	1/1/1	3	0.0532519	2.38193e-05	EXPH5
11	111754574	A	77	C	56	AF=0.333	1/1/1	3	0.0824913	0.0342852	C11orf1
11	111990357	C	13	A	7	AF=0.667	1/1/1	3	0.263176	0.00399148	None
11	113523094	C	13	T	11	AF=0.667	1/1/1	3	0.83882	0.048265	None
11	117061937	G	9	A	5	AF=0.667	1/1/1	3	0.42395	0.0207631	SIDT2
11	117067699	C	14	T	27	AF=0.333	1/1/1	3	0.0595839	3.43651e-05	LOC100652768, SIDT2
11	117084070	T	22	C	22	AF=0.667	1/1/1	3	1	0.0242901	PCSK7
11	117988784	A	12	G	15	AF=0.333	1/1/1	3	0.701108	0.0225521	TMPRSS4
11	117991333	A	9	G	15	AF=0.333	1/1/1	3	0.307456	0.00397488	TMPRSS4
11	118622245	G	173	A	198	AF=0.667	1/1/1	3	0.212701	1.05403e-07	DDX6
11	118769442	A	27	G	23	AF=0.667	1/1/1	3	0.671811	0.00381437	BCL9L
11	118959732	C	16	T	9	AF=0.667	1/1/1	3	0.229523	0.00217053	HMBS
11	118961231	T	48	C	45	AF=0.667	1/1/1	3	0.835846	0.000365481	HMBS
11	118965338	T	86	A	89	AF=0.333	1/1/1	3	0.879885	1.7695e-06	H2AFX
11	118982670	T	11	C	7	AF=0.667	1/1/1	3	0.480682	0.0211367	C2CD2L
11	118982671	G	11	A	7	AF=0.667	1/1/1	3	0.480682	0.0211367	C2CD2L
11	118987971	G	10	A	6	AF=0.667	1/1/1	3	0.454498	0.0173614	None
11	118995353	C	9	G	3	AF=0.667	1/1/1	3	0.145996	0.00382585	HINFP
11	119005485	C	62	T	78	AF=0.333	1/1/1	3	0.204732	6.95545e-08	HINFP
11	119181674	G	26	C	22	AF=0.667	1/1/1	3	0.665466	0.00325014	MCAM
11	119185347	G	10	A	5	AF=0.667	1/1/1	3	0.301758	0.0107384	MCAM
11	119205830	A	110	G	134	AF=0.667	1/1/1	3	0.140748	0.000134613	RNF26
11	120086918	T	17	C	9	AF=0.667	1/1/1	3	0.168638	0.00118986	OAF
11	120209386	G	8	A	12	AF=0.333	1/1/1	3	0.503445	0.0161994	ARHGEF12
11	122932732	C	22	A	23	AF=0.667	1/1/1	3	1	0.0382771	HSPA8
11	124056566	G	5	A	11	AF=0.333	1/1/1	3	0.210114	0.00553862	OR10D3
11	124453666	C	14	A	23	AF=0.333	1/1/1	3	0.187742	0.000361318	None
11	124494676	T	22	C	30	AF=0.333	1/1/1	3	0.33175	0.000333594	TBRG1
11	124965386	T	15	C	12	AF=0.667	1/1/1	3	0.701108	0.0225521	TMEM218
11	124965404	T	16	C	12	AF=0.667	1/1/1	3	0.571588	0.0142174	TMEM218
11	124972208	A	59	G	67	AF=0.667	1/1/1	3	0.533053	0.00172631	TMEM218
11	124972691	T	58	C	38	AF=0.667	1/1/1	3	0.0519105	8.97045e-08	TMEM218
11	125495521	G	33	T	25	AF=0.667	1/1/1	3	0.358143	0.000239048	CHEK1
11	125526161	G	109	A	132	AF=0.667	1/1/1	3	0.156297	0.000122202	CHEK1
11	125765528	G	71	A	81	AF=0.667	1/1/1	3	0.465509	0.000730336	HYLS1, PUS3
11	130099285	C	50	G	68	AF=0.667	1/1/1	3	0.117213	0.0401916	ZBTB44
11	130744977	G	25	A	19	AF=0.667	1/1/1	3	0.451381	0.00193864	None
11	130780015	C	57	T	50	AF=0.667	1/1/1	3	0.562093	2.15575e-05	SNX19
11	134023854	A	30	T	17	AF=0.667	1/1/1	3	0.0789407	3.05335e-05	NCAPD3
11	134236361	A	24	G	16	AF=0.667	1/1/1	3	0.268187	0.000614198	GLB1L2
12	25359328	A	59	T	57	AF=0.333	1/1/1	3	0.926078	0.000504394	KRAS
12	25359352	G	43	A	40	AF=0.333	1/1/1	3	0.826405	0.00503762	KRAS
12	25359841	T	17	C	17	AF=0.333	1/1/1	3	1	0.0453482	KRAS
12	25361074	G	64	A	47	AF=0.667	1/1/1	3	0.128475	1.60231e-07	KRAS
12	26868322	T	9	C	3	AF=0.667	1/1/1	3	0.145996	0.00382585	ITPR2
12	27182751	T	54	C	69	AF=0.667	1/1/1	3	0.206647	0.0163784	MED21
12	27183860	T	7	G	17	AF=0.333	1/1/1	3	0.0639147	0.000250307	None
12	27183897	A	7	G	15	AF=0.333	1/1/1	3	0.133801	0.00100356	None
12	27185886	C	19	G	10	AF=0.667	1/1/1	3	0.136046	0.000510205	None
12	27952620	T	8	G	11	AF=0.333	1/1/1	3	0.647606	0.0286644	KLHL42
12	27952633	C	8	T	11	AF=0.333	1/1/1	3	0.647606	0.0286644	KLHL42
12	30782076	T	93	C	94	AF=0.333	1/1/1	3	1	1.78699e-06	IPO8
12	30782301	A	64	G	86	AF=0.333	1/1/1	3	0.0860711	1.82026e-09	IPO8
12	30782492	C	105	T	84	AF=0.333	1/1/1	3	0.145531	0.00150103	IPO8
12	30906358	G	15	A	12	AF=0.667	1/1/1	3	0.701108	0.0225521	CAPRIN2
12	31242718	T	21	C	20	AF=0.333	1/1/1	3	1	0.0455751	DDX11
12	32834300	C	5	T	10	AF=0.333	1/1/1	3	0.301758	0.0107384	DNM1L
12	32890678	T	10	C	21	AF=0.333	1/1/1	3	0.0707555	0.000150787	DNM1L
12	42477570	T	13	C	24	AF=0.333	1/1/1	3	0.0988717	0.000142636	GXYLT1
12	44115324	G	34	A	38	AF=0.333	1/1/1	3	0.723948	0.00067119	None
12	44119311	C	36	T	30	AF=0.333	1/1/1	3	0.538583	0.0490563	None
12	44123795	C	81	T	73	AF=0.333	1/1/1	3	0.572846	0.000304754	PUS7L
12	44147237	T	3	C	7	AF=0.333	1/1/1	3	0.34375	0.0195481	PUS7L
12	44177511	G	62	A	67	AF=0.667	1/1/1	3	0.724854	0.000517878	IRAK4
12	44180295	G	81	A	99	AF=0.333	1/1/1	3	0.204992	2.63216e-09	IRAK4
12	44182706	A	34	G	29	AF=0.333	1/1/1	3	0.614655	0.0438646	IRAK4
12	45825730	C	36	G	54	AF=0.333	1/1/1	3	0.0725495	2.4789e-07	ANO6
12	46321514	A	113	T	132	AF=0.667	1/1/1	3	0.250102	3.25499e-05	SCAF11
12	48186100	C	25	T	28	AF=0.667	1/1/1	3	0.783846	0.040426	HDAC7
12	48435280	A	10	C	7	AF=0.667	1/1/1	3	0.629059	0.0368036	None
12	48541757	A	18	G	9	AF=0.667	1/1/1	3	0.122078	0.000659675	ASB8
12	49055179	C	7	T	12	AF=0.333	1/1/1	3	0.359283	0.0121329	KANSL2
12	49056663	G	2	A	9	AF=0.333	1/1/1	3	0.0654297	0.0013606	KANSL2
12	49319270	C	14	T	9	AF=0.667	1/1/1	3	0.404873	0.00725583	FKBP11
12	49323238	A	24	C	18	AF=0.667	1/1/1	3	0.440799	0.00162564	None
12	49325578	T	20	C	31	AF=0.333	1/1/1	3	0.16078	7.27622e-05	None
12	49326440	T	14	C	12	AF=0.667	1/1/1	3	0.845019	0.0357312	None
12	49326474	T	7	C	14	AF=0.333	1/1/1	3	0.189247	0.00201017	None
12	49332012	A	169	G	206	AF=0.667	1/1/1	3	0.0628786	2.23763e-06	ARF3
12	49332092	G	108	A	120	AF=0.667	1/1/1	3	0.466389	1.16378e-05	ARF3
12	49500398	G	7	A	10	AF=0.333	1/1/1	3	0.629059	0.0368036	LMBR1L
12	50550948	G	8	A	11	AF=0.333	1/1/1	3	0.647606	0.0286644	CERS5
12	51144432	T	3	C	9	AF=0.333	1/1/1	3	0.145996	0.00382585	None
12	51158548	C	6	G	11	AF=0.333	1/1/1	3	0.332306	0.00896458	ATF1
12	51443387	G	40	A	37	AF=0.667	1/1/1	3	0.819893	0.000948856	LETMD1
12	51443469	A	69	G	59	AF=0.333	1/1/1	3	0.426439	0.00263245	LETMD1
12	51444567	C	18	T	9	AF=0.667	1/1/1	3	0.122078	0.000659675	LETMD1
12	51447054	C	55	G	71	AF=0.333	1/1/1	3	0.181224	1.2122e-07	LETMD1
12	51447506	A	45	G	50	AF=0.667	1/1/1	3	0.681743	0.00452759	LETMD1
12	51449122	A	44	G	54	AF=0.333	1/1/1	3	0.363354	1.27734e-05	LETMD1
12	51469759	G	4	A	10	AF=0.333	1/1/1	3	0.179565	0.00400617	CSRNP2
12	51495292	C	11	A	22	AF=0.333	1/1/1	3	0.0801433	0.00011855	TFCP2
12	53855754	A	12	G	14	AF=0.333	1/1/1	3	0.845019	0.0357312	PCBP2
12	54581614	T	94	C	78	AF=0.333	1/1/1	3	0.252662	0.00114792	SMUG1
12	54634666	T	107	C	111	AF=0.333	1/1/1	3	0.839049	1.1103e-07	CBX5
12	54680342	A	94	T	121	AF=0.667	1/1/1	3	0.0759535	0.00143055	HNRNPA1
12	54765785	G	9	A	14	AF=0.333	1/1/1	3	0.404873	0.00725583	ZNF385A
12	54767443	A	5	G	12	AF=0.333	1/1/1	3	0.143463	0.00288012	ZNF385A
12	54866991	T	18	C	18	AF=0.333	1/1/1	3	1	0.0497778	GTSF1
12	54905815	C	83	G	67	AF=0.333	1/1/1	3	0.220545	0.00411003	NCKAP1L
12	56395420	T	15	A	13	AF=0.667	1/1/1	3	0.850554	0.0275116	SUOX
12	56737256	C	101	A	84	AF=0.333	1/1/1	3	0.239378	0.000746334	STAT2
12	56737257	A	99	G	84	AF=0.333	1/1/1	3	0.300697	0.000399241	STAT2
12	57033353	C	49	T	32	AF=0.667	1/1/1	3	0.0747882	6.8006e-07	ATP5B
12	57034388	A	28	G	31	AF=0.667	1/1/1	3	0.794844	0.0264339	ATP5B
12	57078620	A	12	G	15	AF=0.333	1/1/1	3	0.701108	0.0225521	PTGES3
12	57649840	C	26	T	35	AF=0.333	1/1/1	3	0.305677	0.000116794	R3HDM2
12	58010163	A	28	G	36	AF=0.333	1/1/1	3	0.381733	0.000169472	ARHGEF25, BC073932
12	58142854	C	17	A	21	AF=0.333	1/1/1	3	0.627103	0.00555837	CDK4
12	58144665	C	25	T	23	AF=0.333	1/1/1	3	0.885433	0.0450523	CDK4
12	58162739	A	97	G	99	AF=0.333	1/1/1	3	0.943081	6.76213e-07	METTL1
12	58208164	G	14	A	16	AF=0.333	1/1/1	3	0.855536	0.0309569	AVIL
12	58222672	C	7	A	15	AF=0.333	1/1/1	3	0.133801	0.00100356	CTDSP2
12	62647739	C	16	T	8	AF=0.667	1/1/1	3	0.15159	0.000908996	AK128013, FAM19A2
12	62729222	G	54	C	38	AF=0.667	1/1/1	3	0.11737	6.65025e-07	USP15
12	62729782	A	47	G	42	AF=0.667	1/1/1	3	0.671809	0.000171561	USP15
12	62928633	G	28	A	28	AF=0.667	1/1/1	3	1	0.0103217	MON2
12	63007936	G	16	A	19	AF=0.333	1/1/1	3	0.735879	0.0113954	None
12	64817285	G	12	A	8	AF=0.667	1/1/1	3	0.503445	0.0161994	XPOT
12	65058541	A	16	G	13	AF=0.667	1/1/1	3	0.711071	0.017029	RASSF3
12	66696410	C	11	T	18	AF=0.333	1/1/1	3	0.264931	0.00233297	HELB
12	67699536	G	192	A	200	AF=0.667	1/1/1	3	0.723723	1.74518e-10	CAND1
12	67707441	A	48	G	39	AF=0.333	1/1/1	3	0.391191	0.0299654	CAND1
12	68057438	A	14	G	5	AF=0.667	1/1/1	3	0.0635681	0.00037634	None
12	69633379	A	186	G	220	AF=0.667	1/1/1	3	0.101353	2.09336e-07	CPSF6
12	69658330	T	51	C	39	AF=0.667	1/1/1	3	0.246106	5.58949e-06	CPSF6
12	69667075	T	75	A	62	AF=0.667	1/1/1	3	0.305243	2.62712e-07	CPSF6
12	69744014	C	163	A	134	AF=0.333	1/1/1	3	0.104062	2.59018e-05	LYZ
12	69747834	C	45	T	46	AF=0.667	1/1/1	3	1	0.00168333	E02193, LYZ
12	69753530	C	12	A	8	AF=0.667	1/1/1	3	0.503445	0.0161994	None
12	69982271	A	52	G	42	AF=0.333	1/1/1	3	0.353328	0.0215365	CCT2
12	69993501	A	15	G	12	AF=0.667	1/1/1	3	0.701108	0.0225521	CCT2
12	70635437	C	10	T	3	AF=0.667	1/1/1	3	0.0922852	0.00163342	None
12	70721025	A	8	G	15	AF=0.333	1/1/1	3	0.21004	0.00285358	CNOT2
12	72015488	T	7	C	11	AF=0.333	1/1/1	3	0.480682	0.0211367	ZFC3H1
12	72054970	C	9	A	12	AF=0.333	1/1/1	3	0.663624	0.0339537	ZFC3H1
12	74112769	C	10	T	7	AF=0.667	1/1/1	3	0.629059	0.0368036	None
12	75884876	T	8	C	5	AF=0.667	1/1/1	3	0.581055	0.0396204	GLIPR1
12	75890652	G	61	A	75	AF=0.667	1/1/1	3	0.264893	0.00610437	GLIPR1
12	91780162	C	8	T	4	AF=0.667	1/1/1	3	0.387695	0.0263932	None
12	91780166	C	4	T	8	AF=0.333	1/1/1	3	0.387695	0.0263932	None
12	91828975	T	10	C	14	AF=0.333	1/1/1	3	0.541256	0.0151579	None
12	91834606	A	2	G	8	AF=0.333	1/1/1	3	0.109375	0.00337964	None
12	92135117	G	7	A	11	AF=0.333	1/1/1	3	0.480682	0.0211367	None
12	92160974	T	22	C	10	AF=0.667	1/1/1	3	0.0501025	4.66981e-05	None
12	93895774	C	187	T	205	AF=0.667	1/1/1	3	0.390572	3.99752e-09	MRPL42
12	93898524	G	43	A	29	AF=0.667	1/1/1	3	0.124918	7.01938e-06	None
12	93898653	T	21	G	20	AF=0.667	1/1/1	3	1	0.019551	None
12	93903228	C	10	T	14	AF=0.333	1/1/1	3	0.541256	0.0151579	None
12	94071184	T	59	A	78	AF=0.333	1/1/1	3	0.123775	1.66965e-08	CRADD
12	94671910	G	18	A	12	AF=0.667	1/1/1	3	0.361595	0.0030856	PLXNC1
12	94759996	C	9	T	3	AF=0.667	1/1/1	3	0.145996	0.00382585	CCDC41
12	96652358	C	5	A	10	AF=0.333	1/1/1	3	0.301758	0.0107384	ELK3
12	96672743	G	18	C	11	AF=0.667	1/1/1	3	0.264931	0.00233297	CDK17
12	98908547	C	33	T	32	AF=0.333	1/1/1	3	1	0.00820519	TMPO-AS1
12	98934321	T	5	C	10	AF=0.333	1/1/1	3	0.301758	0.0107384	TMPO
12	99043207	A	10	G	6	AF=0.667	1/1/1	3	0.454498	0.0173614	APAF1
12	99127431	T	38	G	43	AF=0.667	1/1/1	3	0.656992	0.012773	APAF1
12	104329950	G	17	A	11	AF=0.667	1/1/1	3	0.344928	0.00397389	HSP90B1
12	104344215	G	10	A	6	AF=0.667	1/1/1	3	0.454498	0.0173614	C12orf73
12	104344361	A	10	G	3	AF=0.667	1/1/1	3	0.0922852	0.00163342	C12orf73
12	104344670	G	38	A	32	AF=0.667	1/1/1	3	0.550413	0.000326555	C12orf73
12	104349276	G	17	A	11	AF=0.667	1/1/1	3	0.344928	0.00397389	C12orf73
12	104362132	C	8	A	4	AF=0.667	1/1/1	3	0.387695	0.0263932	TDG
12	105550565	C	52	T	43	AF=0.333	1/1/1	3	0.41191	0.0163016	KIAA1033
12	107395106	A	99	G	93	AF=0.333	1/1/1	3	0.718319	1.56009e-05	CRY1
12	107486912	C	30	T	48	AF=0.333	1/1/1	3	0.0535444	4.00893e-07	CRY1
12	108643057	G	12	A	14	AF=0.333	1/1/1	3	0.845019	0.0357312	WSCD2
12	108923950	A	264	G	242	AF=0.333	1/1/1	3	0.350539	1.50266e-11	SART3
12	108925762	G	6	A	13	AF=0.333	1/1/1	3	0.167068	0.00231089	SART3
12	108956610	C	31	G	43	AF=0.333	1/1/1	3	0.200678	1.7736e-05	ISCU
12	109037789	G	13	A	7	AF=0.667	1/1/1	3	0.263176	0.00399148	None
12	109051943	T	11	C	6	AF=0.667	1/1/1	3	0.332306	0.00896458	CORO1C
12	109896724	A	7	G	13	AF=0.333	1/1/1	3	0.263176	0.00399148	KCTD10
12	110028032	A	8	G	3	AF=0.667	1/1/1	3	0.226562	0.00876373	MVK
12	110354636	C	45	A	52	AF=0.667	1/1/1	3	0.54261	0.00930185	TCHP
12	110483175	A	9	C	4	AF=0.667	1/1/1	3	0.266846	0.0139305	C12orf76
12	110483350	C	11	T	15	AF=0.333	1/1/1	3	0.557197	0.0116391	C12orf76
12	110782532	C	35	T	29	AF=0.667	1/1/1	3	0.532309	0.00047697	ATP2A2
12	110815922	A	16	G	7	AF=0.667	1/1/1	3	0.0931396	0.000499885	ANAPC7
12	110815950	A	15	C	7	AF=0.667	1/1/1	3	0.133801	0.00100356	ANAPC7
12	110835991	G	33	C	25	AF=0.667	1/1/1	3	0.358143	0.000239048	ANAPC7
12	112486818	A	8	G	4	AF=0.667	1/1/1	3	0.387695	0.0263932	NAA25
12	112490764	G	3	C	9	AF=0.333	1/1/1	3	0.145996	0.00382585	NAA25
12	112521448	G	10	A	21	AF=0.333	1/1/1	3	0.0707555	0.000150787	NAA25
12	113623275	A	11	G	20	AF=0.333	1/1/1	3	0.149613	0.000427488	DDX54
12	113670799	G	5	A	14	AF=0.333	1/1/1	3	0.0635681	0.00037634	TPCN1
12	114182892	G	92	A	71	AF=0.333	1/1/1	3	0.116954	0.0076061	AK096932
12	114189961	A	35	G	30	AF=0.333	1/1/1	3	0.620145	0.034551	AK096932, BC007399
12	116392381	T	7	C	12	AF=0.333	1/1/1	3	0.359283	0.0121329	None
12	118466479	G	10	A	3	AF=0.667	1/1/1	3	0.0922852	0.00163342	RFC5
12	118471760	A	153	G	145	AF=0.667	1/1/1	3	0.685181	1.52177e-10	WSB2
12	120554802	C	42	T	63	AF=0.333	1/1/1	3	0.0504422	3.11625e-08	AK130486
12	120594134	A	7	G	13	AF=0.333	1/1/1	3	0.263176	0.00399148	GCN1L1
12	120927826	C	11	T	20	AF=0.333	1/1/1	3	0.149613	0.000427488	DYNLL1
12	120933092	A	12	C	10	AF=0.667	1/1/1	3	0.831812	0.0418515	DYNLL1, DYNLL1-AS1
12	120941215	T	99	C	76	AF=0.333	1/1/1	3	0.0960235	0.00620528	COQ5
12	120966921	A	150	G	120	AF=0.333	1/1/1	3	0.0773894	0.000168441	COQ5
12	121018422	T	36	A	38	AF=0.667	1/1/1	3	0.907561	0.00645141	POP5
12	121682699	C	22	G	14	AF=0.667	1/1/1	3	0.242985	0.000657977	CAMKK2
12	121690093	C	6	T	10	AF=0.333	1/1/1	3	0.454498	0.0173614	CAMKK2
12	121892786	A	8	G	13	AF=0.333	1/1/1	3	0.38331	0.00906972	KDM2B
12	122354382	T	251	G	212	AF=0.333	1/1/1	3	0.0772811	2.79399e-08	PSMD9
12	122523668	T	5	G	8	AF=0.333	1/1/1	3	0.581055	0.0396204	MLXIP
12	122617989	A	43	G	31	AF=0.667	1/1/1	3	0.200678	1.7736e-05	MLXIP
12	122623000	T	99	C	77	AF=0.667	1/1/1	3	0.113179	5.58562e-10	MLXIP
12	122625212	A	29	G	24	AF=0.667	1/1/1	3	0.583132	0.00186566	MLXIP
12	122628516	A	81	T	81	AF=0.667	1/1/1	3	1	1.22616e-05	MLXIP
12	122973666	C	27	T	15	AF=0.667	1/1/1	3	0.0884295	4.88058e-05	ZCCHC8
12	122978117	C	14	T	5	AF=0.667	1/1/1	3	0.0635681	0.00037634	ZCCHC8
12	123947974	G	19	A	20	AF=0.333	1/1/1	3	1	0.02567	SNRNP35
12	124001751	G	21	A	15	AF=0.667	1/1/1	3	0.405032	0.0022714	RILPL1
12	124002762	A	31	T	18	AF=0.667	1/1/1	3	0.0854331	2.33139e-05	RILPL1
12	124498969	G	106	A	95	AF=0.667	1/1/1	3	0.480688	1.93174e-08	ZNF664, ZNF664-FAM101A
12	124957627	C	34	T	36	AF=0.667	1/1/1	3	0.904975	0.0105734	NCOR2
12	125340447	G	3	A	7	AF=0.333	1/1/1	3	0.34375	0.0195481	SCARB1
12	125438039	T	12	C	10	AF=0.667	1/1/1	3	0.831812	0.0418515	DHX37
12	125438523	C	115	T	139	AF=0.667	1/1/1	3	0.148835	7.9455e-05	DHX37
12	125439584	T	14	C	17	AF=0.333	1/1/1	3	0.7201	0.0203061	DHX37
12	125439806	T	12	C	20	AF=0.333	1/1/1	3	0.215327	0.00100806	DHX37
12	127546361	G	46	A	32	AF=0.667	1/1/1	3	0.140538	5.18285e-06	None
12	127630365	G	39	A	30	AF=0.667	1/1/1	3	0.335558	9.37841e-05	None
12	129295390	G	9	C	12	AF=0.333	1/1/1	3	0.663624	0.0339537	SLC15A4
12	129304251	A	16	G	8	AF=0.667	1/1/1	3	0.15159	0.000908996	SLC15A4
12	129594296	G	274	T	249	AF=0.333	1/1/1	3	0.293965	1.66003e-11	BC060326, BC073948, TMEM132D
12	131361361	A	116	C	104	AF=0.333	1/1/1	3	0.458395	2.1302e-05	None
12	131624680	G	11	C	5	AF=0.667	1/1/1	3	0.210114	0.00553862	GPR133
12	131625060	T	10	C	7	AF=0.667	1/1/1	3	0.629059	0.0368036	GPR133
12	133146070	C	25	T	15	AF=0.667	1/1/1	3	0.15386	0.000167341	FBRSL1
12	133146594	C	14	T	15	AF=0.333	1/1/1	3	1	0.0471081	FBRSL1
12	133146701	C	21	T	24	AF=0.333	1/1/1	3	0.765992	0.00652862	FBRSL1
[truncated: 1,147 more rows]

## Sheet: Rep2_False_Positive_ASE
Chr	Position	Ref allele	# RNA-seq reads of ref allele	Alt allele	# RNA-seq reads of alt allele	Frequency of alt allele in WGS	Genotype in WGS	CN	Binomial test p=0.5	Binomial test p=AF	Gene Overlap
1	1717340	C	503	A	183	AF=0.25	0/1/1/1	4	2.12466e-35	0.310704	GNB1
1	10523195	C	235	T	93	AF=0.25	0/1/1/1	4	2.53237e-15	0.161007	DFFA
1	16927419	G	70	A	15	AF=0.25	0/1/1/1	4	1.17249e-09	0.132871	NBPF1
1	16930211	C	8	A	32	AF=0.75	0/1/1/1	4	0.000182166	0.584688	NBPF1
1	16930805	C	18	T	5	AF=0.25	0/1/1/1	4	0.010622	1	NBPF1
1	16932105	T	7	C	22	AF=0.75	0/1/1/1	4	0.00813006	1	NBPF1
1	16932144	A	87	C	21	AF=0.25	0/1/1/1	4	9.90317e-11	0.221037	NBPF1
1	16944945	G	235	A	74	AF=0.25	0/1/1/1	4	1.1038e-20	0.694039	CROCCP2
1	16945227	G	173	T	45	AF=0.25	0/1/1/1	4	6.84957e-19	0.158813	CROCCP2
1	16945409	T	314	A	116	AF=0.25	0/1/1/1	4	3.72312e-22	0.344004	CROCCP2
1	16949745	A	174	G	48	AF=0.25	0/1/1/1	4	5.723e-18	0.277747	CROCCP2
1	16952260	T	40	C	10	AF=0.25	0/1/1/1	4	2.38613e-05	0.514121	CROCCP2
1	16952267	T	31	C	12	AF=0.25	0/1/1/1	4	0.00540157	0.724482	CROCCP2
1	16958569	T	18	C	7	AF=0.25	0/1/1/1	4	0.0432853	0.81718	CROCCP2, FLJ00313
1	16959814	C	169	T	48	AF=0.25	0/1/1/1	4	5.4074e-17	0.347712	CROCCP2, FLJ00313
1	19984461	C	12	T	3	AF=0.25	0/1/1/1	4	0.0351562	1	MINOS1-NBL1, NBL1
1	22005665	C	14	T	32	AF=0.75	0/1/1/1	4	0.0113516	0.396169	USP48
1	22052231	A	35	G	76	AF=0.75	0/1/1/1	4	0.000124656	0.124364	USP48
1	26598281	T	18	C	67	AF=0.75	0/1/1/1	4	8.41232e-08	0.454847	CEP85
1	36282608	G	62	T	28	AF=0.25	0/1/1/1	4	0.000437922	0.181638	AGO4
1	55505668	C	127	T	69	AF=0.333	0/1/1/1	3	4.14487e-05	0.595879	PCSK9
1	55522415	G	34	A	9	AF=0.333	0/1/1/1	3	0.000170155	0.104851	PCSK9
1	55522425	G	30	A	9	AF=0.333	0/1/1/1	3	0.00106502	0.233642	PCSK9
1	55524116	C	2	T	10	AF=0.667	0/1/1/1	3	0.0385742	0.358815	PCSK9
1	55524842	G	4	A	17	AF=0.667	0/1/1/1	3	0.00719738	0.245886	PCSK9
1	55525868	C	12	T	26	AF=0.667	0/1/1/1	3	0.0335524	1	PCSK9
1	55533093	C	190	T	83	AF=0.333	0/1/1/1	3	8.10209e-11	0.335567	USP24
1	55574364	G	7	A	18	AF=0.667	0/1/1/1	3	0.0432853	0.674741	USP24
1	55638075	G	31	A	79	AF=0.667	0/1/1/1	3	5.34489e-06	0.267682	USP24
1	58971831	G	60	A	92	AF=0.667	0/1/1/1	3	0.0116731	0.121002	DAB1, OMA1
1	59011137	C	25	A	8	AF=0.333	0/1/1/1	3	0.00455138	0.35591	DAB1, OMA1
1	59120579	G	22	A	45	AF=0.667	0/1/1/1	3	0.00674145	1	MYSM1
1	59120650	C	23	T	43	AF=0.667	0/1/1/1	3	0.0186573	0.794734	MYSM1
1	59121036	A	156	C	346	AF=0.667	0/1/1/1	3	1.35229e-17	0.297903	MYSM1
1	59122871	C	72	T	117	AF=0.667	0/1/1/1	3	0.00130976	0.165228	MYSM1
1	59123995	A	58	G	143	AF=0.667	0/1/1/1	3	1.80456e-09	0.203193	MYSM1
1	59124223	G	32	A	73	AF=0.667	0/1/1/1	3	7.80842e-05	0.60502	MYSM1
1	59124803	C	67	T	132	AF=0.667	0/1/1/1	3	4.75056e-06	0.940069	MYSM1
1	59125319	C	57	T	101	AF=0.667	0/1/1/1	3	0.000580127	0.448928	MYSM1
1	59141365	G	12	A	26	AF=0.667	0/1/1/1	3	0.0335524	1	MYSM1
1	59142713	T	95	C	148	AF=0.667	0/1/1/1	3	0.0008152	0.0568787	MYSM1
1	59153177	A	8	T	27	AF=0.667	0/1/1/1	3	0.00187823	0.213446	MYSM1
1	59153179	C	8	T	27	AF=0.667	0/1/1/1	3	0.00187823	0.213446	MYSM1
1	59162148	T	22	C	7	AF=0.333	0/1/1/1	3	0.00813006	0.331762	MYSM1
1	62916796	T	74	C	180	AF=0.667	0/1/1/1	3	2.29122e-11	0.162755	USP1
1	63153953	C	20	T	42	AF=0.667	0/1/1/1	3	0.00714873	1	DOCK7
1	63330217	G	41	A	13	AF=0.333	0/1/1/1	3	0.000175127	0.193067	ATG4C
1	63879440	A	57	G	17	AF=0.333	0/1/1/1	3	3.39717e-06	0.0642632	ALG6
1	63914117	A	27	G	13	AF=0.333	0/1/1/1	3	0.0384773	1	ITGB3BP
1	63914123	A	13	G	27	AF=0.667	0/1/1/1	3	0.0384773	1	ITGB3BP
1	63915343	A	26	G	53	AF=0.667	0/1/1/1	3	0.00318301	1	ITGB3BP
1	65879488	A	73	C	146	AF=0.667	0/1/1/1	3	9.15341e-07	1	DNAJC6
1	65892888	C	36	A	16	AF=0.333	0/1/1/1	3	0.00778744	0.769889	LEPR, LEPROT
1	65895130	A	87	G	57	AF=0.333	0/1/1/1	3	0.0153705	0.112071	LEPR, LEPROT
1	65900357	G	166	T	70	AF=0.333	0/1/1/1	3	3.59921e-10	0.269036	LEPR, LEPROT
1	65911607	T	31	C	13	AF=0.333	0/1/1/1	3	0.00955988	0.749257	LEPR
1	65939443	C	148	G	63	AF=0.333	0/1/1/1	3	4.58679e-09	0.307033	LEPR
1	65941532	G	63	A	25	AF=0.333	0/1/1/1	3	6.27038e-05	0.366665	LEPR
1	65942266	T	140	C	69	AF=0.333	0/1/1/1	3	1.02281e-06	1	LEPR
1	65943197	G	95	A	39	AF=0.333	0/1/1/1	3	1.4408e-06	0.315146	LEPR
1	65943872	A	101	G	59	AF=0.333	0/1/1/1	3	0.00112291	0.356279	LEPR
1	65944850	T	51	C	30	AF=0.333	0/1/1/1	3	0.0256544	0.480722	LEPR
1	65945906	T	46	C	16	AF=0.333	0/1/1/1	3	0.000176327	0.227869	LEPR
1	65945965	G	22	A	6	AF=0.333	0/1/1/1	3	0.00371917	0.230206	LEPR
1	65946506	A	30	G	9	AF=0.333	0/1/1/1	3	0.00106502	0.233642	LEPR
1	66088477	G	26	A	5	AF=0.333	0/1/1/1	3	0.000192195	0.0547235	LEPR
1	66099831	C	137	T	82	AF=0.333	0/1/1/1	3	0.000245924	0.197249	LEPR
1	66100915	C	44	T	12	AF=0.333	0/1/1/1	3	2.08766e-05	0.0652251	LEPR
1	67727778	C	16	T	33	AF=0.667	0/1/1/1	3	0.0212941	1	None
1	67730055	A	23	G	5	AF=0.333	0/1/1/1	3	0.000912234	0.107451	None
1	67875203	C	111	T	42	AF=0.333	0/1/1/1	3	2.24556e-08	0.144476	SERBP1
1	67875414	T	32	C	87	AF=0.667	0/1/1/1	3	4.6934e-07	0.145464	SERBP1
1	67876484	C	83	T	148	AF=0.667	0/1/1/1	3	2.26485e-05	0.402584	SERBP1
1	67887563	G	7	A	30	AF=0.667	0/1/1/1	3	0.000191076	0.079769	SERBP1
1	67889571	C	13	G	34	AF=0.667	0/1/1/1	3	0.00308768	0.444072	SERBP1
1	68151980	T	33	G	73	AF=0.667	0/1/1/1	3	0.000128221	0.681111	GADD45A
1	68152438	C	16	T	38	AF=0.667	0/1/1/1	3	0.00383827	0.665491	GADD45A
1	68949139	T	26	C	8	AF=0.333	0/1/1/1	3	0.00293506	0.2766	DEPDC1
1	70611208	A	13	T	45	AF=0.667	0/1/1/1	3	3.01159e-05	0.0938838	LRRC40
1	70820008	C	24	T	59	AF=0.667	0/1/1/1	3	0.000154559	0.417932	ANKRD13C
1	70905354	G	19	A	47	AF=0.667	0/1/1/1	3	0.000756107	0.514216	CTH
1	70905545	G	2	A	10	AF=0.667	0/1/1/1	3	0.0385742	0.358815	None
1	70910065	A	11	G	26	AF=0.667	0/1/1/1	3	0.0200739	0.729287	None
1	71472911	G	98	A	35	AF=0.333	0/1/1/1	3	4.29206e-08	0.0975123	PTGER3
1	71473791	T	43	C	77	AF=0.667	0/1/1/1	3	0.00244686	0.561924	PTGER3
1	71477315	A	8	T	25	AF=0.667	0/1/1/1	3	0.00455138	0.35591	PTGER3
1	71534309	G	35	A	19	AF=0.333	0/1/1/1	3	0.0402236	0.773843	ZRANB2
1	71535608	T	71	C	151	AF=0.667	0/1/1/1	3	8.38063e-08	0.722008	ZRANB2
1	74665493	G	100	A	42	AF=0.333	0/1/1/1	3	1.24301e-06	0.374064	FPGT, FPGT-TNNI3K
1	74667686	A	15	G	5	AF=0.333	0/1/1/1	3	0.0413895	0.48797	FPGT, FPGT-TNNI3K
1	77556766	T	31	A	89	AF=0.667	0/1/1/1	3	1.11877e-07	0.0991186	PIGK
1	78418487	A	22	G	45	AF=0.667	0/1/1/1	3	0.00674145	1	FUBP1
1	78418903	A	29	G	48	AF=0.667	0/1/1/1	3	0.0395395	0.468168	FUBP1
1	84762097	G	3	A	15	AF=0.667	0/1/1/1	3	0.00753784	0.209209	None
1	85110971	A	107	C	54	AF=0.333	0/1/1/1	3	3.58041e-05	0.933565	SSX2IP
1	85644345	T	1	G	9	AF=0.667	0/1/1/1	3	0.0214844	0.180663	SYDE2
1	85666327	T	2	C	12	AF=0.667	0/1/1/1	3	0.0129395	0.163098	SYDE2
1	85741734	A	14	T	3	AF=0.333	0/1/1/1	3	0.0127258	0.20607	BCL10
1	85742264	G	12	C	39	AF=0.667	0/1/1/1	3	0.000198039	0.180331	BCL10, LOC646626
1	86119296	C	94	A	65	AF=0.333	0/1/1/1	3	0.0260702	0.0525267	ZNHIT6
1	87808174	G	1	C	9	AF=0.667	0/1/1/1	3	0.0214844	0.180663	LMO4
1	89426902	G	98	A	194	AF=0.667	0/1/1/1	3	2.03706e-08	0.950503	CCBL2
1	89429149	T	5	C	18	AF=0.667	0/1/1/1	3	0.010622	0.276561	CCBL2
1	90024094	T	33	C	17	AF=0.333	0/1/1/1	3	0.0328391	0.882056	LRRC8B
1	90049040	A	49	G	28	AF=0.333	0/1/1/1	3	0.0220335	0.548386	LRRC8B
1	90059575	G	64	T	30	AF=0.333	0/1/1/1	3	0.000587902	0.82737	LRRC8B
1	91309231	A	24	G	11	AF=0.333	0/1/1/1	3	0.0409596	1	AK022898
1	91782011	G	21	A	6	AF=0.333	0/1/1/1	3	0.00592461	0.307037	HFM1
1	91980649	G	23	A	41	AF=0.667	0/1/1/1	3	0.0327658	0.691114	CDC7
1	91986709	A	3	G	13	AF=0.667	0/1/1/1	3	0.0212708	0.292529	CDC7
1	92715635	A	12	G	31	AF=0.667	0/1/1/1	3	0.00540157	0.519916	GLMN
1	93304272	C	13	T	4	AF=0.333	0/1/1/1	3	0.0490417	0.453466	FAM69A, RPL5
1	93305371	A	4	C	19	AF=0.667	0/1/1/1	3	0.00259948	0.123957	FAM69A, RPL5
1	93592692	A	20	T	5	AF=0.333	0/1/1/1	3	0.00407732	0.203802	MTF2
1	93596936	T	3	C	19	AF=0.667	0/1/1/1	3	0.000855446	0.0677482	MTF2
1	93616202	T	18	C	36	AF=0.667	0/1/1/1	3	0.0198343	1	TMED5
1	93620393	G	209	A	468	AF=0.667	0/1/1/1	3	1.00401e-23	0.191916	TMED5
1	93624374	T	4	C	14	AF=0.667	0/1/1/1	3	0.0308838	0.454315	TMED5
1	93630172	G	1	A	12	AF=0.667	0/1/1/1	3	0.00341797	0.0731862	TMED5
1	93672688	C	104	T	46	AF=0.333	0/1/1/1	3	2.47158e-06	0.544529	CCDC18
1	93791437	G	30	C	77	AF=0.667	0/1/1/1	3	6.27761e-06	0.261089	LOC100131564
1	93802264	T	43	A	71	AF=0.667	0/1/1/1	3	0.0111186	0.321358	LOC100131564
1	93804952	G	77	A	140	AF=0.667	0/1/1/1	3	2.26849e-05	0.516934	LOC100131564
1	93811917	C	107	T	42	AF=0.333	0/1/1/1	3	1.00129e-07	0.193396	DR1
1	94339683	C	22	T	4	AF=0.333	0/1/1/1	3	0.000533521	0.0605731	DNTTIP2
1	94341267	A	363	G	171	AF=0.333	0/1/1/1	3	6.46119e-17	0.550799	DNTTIP2
1	94343023	A	332	G	145	AF=0.333	0/1/1/1	3	6.18355e-18	0.189673	DNTTIP2
1	95699978	A	20	G	6	AF=0.333	0/1/1/1	3	0.00935531	0.30574	RWDD3, TMEM56-RWDD3
1	95705615	G	31	A	16	AF=0.333	0/1/1/1	3	0.0399861	0.878469	RWDD3, TMEM56-RWDD3
1	95709039	A	20	G	8	AF=0.333	0/1/1/1	3	0.0356981	0.691405	RWDD3, TMEM56-RWDD3
1	97279692	C	61	T	158	AF=0.667	0/1/1/1	3	4.21542e-11	0.0988826	PTBLP, PTBP2
1	100193600	C	4	T	15	AF=0.667	0/1/1/1	3	0.0192108	0.334181	FRRS1
1	100547994	T	47	C	88	AF=0.667	0/1/1/1	3	0.000527335	0.715387	HIAT1
1	100575933	G	115	A	184	AF=0.667	0/1/1/1	3	7.8577e-05	0.0654497	SASS6
1	100732526	C	2	G	11	AF=0.667	0/1/1/1	3	0.0224609	0.242342	RTCA
1	100754090	G	28	A	7	AF=0.333	0/1/1/1	3	0.00050826	0.107691	RTCA
1	101338324	T	50	C	84	AF=0.667	0/1/1/1	3	0.00418753	0.359284	EXTL2
1	101443395	C	43	T	20	AF=0.333	0/1/1/1	3	0.0051524	0.893872	SLC30A7
1	101552421	G	88	A	59	AF=0.333	0/1/1/1	3	0.0206051	0.0805779	AK021551, BC045807, BX538249
1	109758657	G	262	T	68	AF=0.25	0/1/1/1	4	5.35002e-28	0.0654459	SARS
1	144880832	T	60	C	93	AF=0.667	0/1/1/1	3	0.00945384	0.12314	LOC100288142, LOC653513, NBPF9, PDE4DIP
1	144885645	T	2	C	15	AF=0.667	0/1/1/1	3	0.00234985	0.0715024	LOC100288142, LOC653513, NBPF9, PDE4DIP
1	144923148	C	6	T	17	AF=0.667	0/1/1/1	3	0.0346897	0.516661	LOC100288142, LOC653513, NBPF9, PDE4DIP
1	144923275	G	4	A	17	AF=0.667	0/1/1/1	3	0.00719738	0.245886	LOC100288142, LOC653513, NBPF9, PDE4DIP
1	144923294	T	5	C	17	AF=0.667	0/1/1/1	3	0.0169005	0.369388	LOC100288142, LOC653513, NBPF9, PDE4DIP
1	144991810	G	21	A	8	AF=0.333	0/1/1/1	3	0.0241195	0.562011	LOC100288142, LOC653513, NBPF9, PDE4DIP
1	144992347	C	27	G	8	AF=0.333	0/1/1/1	3	0.00187823	0.213446	LOC100288142, LOC653513, NBPF9, PDE4DIP
1	144994346	A	5	C	16	AF=0.667	0/1/1/1	3	0.0266037	0.488508	LOC100288142, LOC653513, NBPF9, PDE4DIP
1	145689271	A	35	G	12	AF=0.333	0/1/1/1	3	0.00108854	0.282765	LOC100288142, NBPF10
1	146626922	T	86	C	35	AF=0.333	0/1/1/1	3	4.00411e-06	0.335578	PRKAB2
1	146714392	G	63	C	96	AF=0.667	0/1/1/1	3	0.0109246	0.0928702	CHD1L
1	146731952	C	29	A	56	AF=0.667	0/1/1/1	3	0.00451164	0.908477	CHD1L
1	146735636	G	22	A	39	AF=0.667	0/1/1/1	3	0.039617	0.68403	CHD1L
1	146740197	G	49	T	21	AF=0.333	0/1/1/1	3	0.00109324	0.613447	CHD1L
1	146740576	G	6	A	28	AF=0.667	0/1/1/1	3	0.000195126	0.0671695	CHD1L
1	146746622	T	5	C	25	AF=0.667	0/1/1/1	3	0.000324914	0.0543561	CHD1L
1	146757719	G	7	A	25	AF=0.667	0/1/1/1	3	0.0021024	0.193161	CHD1L
1	150280801	G	151	C	76	AF=0.333	0/1/1/1	3	7.2353e-07	0.943972	MRPS21
1	150319884	G	4	A	17	AF=0.667	0/1/1/1	3	0.00719738	0.245886	PRPF3
1	150321486	G	6	A	18	AF=0.667	0/1/1/1	3	0.0226558	0.517006	PRPF3
1	150479977	A	35	G	100	AF=0.667	0/1/1/1	3	1.94095e-08	0.0822433	TARS2
1	150482738	G	4	A	22	AF=0.667	0/1/1/1	3	0.000533521	0.0605731	ECM1
1	150483355	C	65	T	94	AF=0.667	0/1/1/1	3	0.0260702	0.0525267	ECM1
1	150484987	G	56	A	100	AF=0.667	0/1/1/1	3	0.000533633	0.49738	ECM1
1	150526044	G	158	C	261	AF=0.667	0/1/1/1	3	5.52376e-07	0.0618937	ADAMTSL4
1	150527354	G	10	A	36	AF=0.667	0/1/1/1	3	0.000156417	0.117147	ADAMTSL4
1	150531050	G	155	A	330	AF=0.667	0/1/1/1	3	1.36633e-15	0.56325	ADAMTSL4
1	150564476	T	2	C	11	AF=0.667	0/1/1/1	3	0.0224609	0.242342	None
1	150586971	G	19	A	47	AF=0.667	0/1/1/1	3	0.000756107	0.514216	None
1	150587140	T	4	G	18	AF=0.667	0/1/1/1	3	0.00434351	0.174946	None
1	150588692	C	47	T	79	AF=0.667	0/1/1/1	3	0.00553603	0.34543	None
1	150604110	G	4	T	13	AF=0.667	0/1/1/1	3	0.0490417	0.453466	None
1	150620569	C	77	G	53	AF=0.333	0/1/1/1	3	0.0432551	0.0769736	GOLPH3L
1	150666990	G	22	C	4	AF=0.333	0/1/1/1	3	0.000533521	0.0605731	GOLPH3L
1	150727539	G	57	A	24	AF=0.333	0/1/1/1	3	0.000317317	0.555988	CTSS
1	150938571	G	1111	A	499	AF=0.333	0/1/1/1	3	1.20797e-53	0.0503839	CERS2
1	151006691	C	66	T	136	AF=0.667	0/1/1/1	3	9.48404e-07	0.881555	PRUNE
1	151052199	C	1	G	12	AF=0.667	0/1/1/1	3	0.00341797	0.0731862	GABPB2
1	151089885	G	26	C	65	AF=0.667	0/1/1/1	3	5.31176e-05	0.37468	GABPB2
1	151089888	A	27	C	67	AF=0.667	0/1/1/1	3	4.49643e-05	0.382408	GABPB2
1	151092086	C	27	T	9	AF=0.333	0/1/1/1	3	0.00393317	0.376869	None
1	151112483	T	1	C	12	AF=0.667	0/1/1/1	3	0.00341797	0.0731862	SEMA6C
1	151343545	T	20	C	7	AF=0.333	0/1/1/1	3	0.0191573	0.541228	SELENBP1
1	151374025	T	1106	C	2184	AF=0.667	0/1/1/1	3	4.36219e-80	0.697738	PSMB4
1	151375584	T	27	C	75	AF=0.667	0/1/1/1	3	2.14769e-06	0.171617	POGZ
1	151411635	A	1	C	11	AF=0.667	0/1/1/1	3	0.00634766	0.0728458	POGZ
1	151430504	G	20	C	7	AF=0.333	0/1/1/1	3	0.0191573	0.541228	POGZ
1	151431632	T	59	C	25	AF=0.333	0/1/1/1	3	0.000266451	0.563125	POGZ
1	151669555	C	55	A	26	AF=0.333	0/1/1/1	3	0.00168864	0.906308	KIAA0488, SNX27
1	151669997	C	57	A	26	AF=0.333	0/1/1/1	3	0.000877552	0.815923	KIAA0488, SNX27
1	151735441	G	6	A	22	AF=0.667	0/1/1/1	3	0.00371917	0.230206	MRPL9
1	151747970	A	47	G	20	AF=0.333	0/1/1/1	3	0.00130717	0.605661	TDRKH
1	151844650	G	27	A	6	AF=0.333	0/1/1/1	3	0.000324063	0.0670486	THEM4
1	151846517	C	14	T	45	AF=0.667	0/1/1/1	3	6.53063e-05	0.129863	THEM4
1	151847193	A	87	C	212	AF=0.667	0/1/1/1	3	3.36931e-13	0.125472	THEM4
1	153781888	G	45	A	117	AF=0.667	0/1/1/1	3	1.4166e-08	0.156188	GATAD2B
1	153904574	T	25	C	12	AF=0.333	0/1/1/1	3	0.047031	1	DENND4B
1	153907908	T	33	C	8	AF=0.333	0/1/1/1	3	0.000112221	0.06827	DENND4B
1	153926078	T	38	C	19	AF=0.333	0/1/1/1	3	0.0163481	1	CRTC2
1	153927052	C	14	G	4	AF=0.333	0/1/1/1	3	0.0308838	0.454315	CRTC2
1	154143205	T	8	G	31	AF=0.667	0/1/1/1	3	0.000294077	0.124668	TPM3
1	154950727	A	1	T	11	AF=0.667	0/1/1/1	3	0.00634766	0.0728458	CKS1B
1	155021998	C	7	G	19	AF=0.667	0/1/1/1	3	0.0289593	0.541009	DCST1, LOC100505666
1	155221837	C	7	A	18	AF=0.667	0/1/1/1	3	0.0432853	0.674741	FAM189B
1	155258752	G	47	A	116	AF=0.667	0/1/1/1	3	6.45035e-08	0.245085	HCN3
1	155258756	C	45	T	88	AF=0.667	0/1/1/1	3	0.000241696	0.926744	HCN3
1	155260383	G	125	T	296	AF=0.667	0/1/1/1	3	4.33919e-17	0.120931	PKLR
1	155280164	T	20	C	60	AF=0.667	0/1/1/1	3	8.58056e-06	0.123921	FDPS
1	155284261	C	52	T	90	AF=0.667	0/1/1/1	3	0.00180171	0.423093	FDPS
1	155286258	C	39	T	65	AF=0.667	0/1/1/1	3	0.0138362	0.405173	FDPS
1	155538195	G	23	A	50	AF=0.667	0/1/1/1	3	0.00211817	0.804711	None
1	155658085	T	13	C	28	AF=0.667	0/1/1/1	3	0.0275332	1	YY1AP1
1	155706217	T	32	G	91	AF=0.667	0/1/1/1	3	9.73884e-08	0.103367	DAP3, YY1AP1
1	155723297	T	20	C	52	AF=0.667	0/1/1/1	3	0.000207716	0.381616	GON4L, YY1AP1
1	155723420	T	12	C	44	AF=0.667	0/1/1/1	3	2.08766e-05	0.0652251	GON4L, YY1AP1
1	155947930	C	5	T	18	AF=0.667	0/1/1/1	3	0.010622	0.276561	ARHGEF2
1	155951502	A	5	G	20	AF=0.667	0/1/1/1	3	0.00407732	0.203802	ARHGEF2
1	155985899	A	3	G	12	AF=0.667	0/1/1/1	3	0.0351562	0.412257	SSR2
1	156042915	G	48	A	14	AF=0.333	0/1/1/1	3	1.74285e-05	0.0800487	MEX3A
1	156304782	A	9	G	23	AF=0.667	0/1/1/1	3	0.0200616	0.580369	CCT3
1	156374256	C	1	T	11	AF=0.667	0/1/1/1	3	0.00634766	0.0728458	BC016978, C1orf61
1	156526387	C	29	G	13	AF=0.333	0/1/1/1	3	0.0195205	0.87032	IQGAP3
1	156532733	T	44	C	22	AF=0.333	0/1/1/1	3	0.00921049	1	IQGAP3
1	156594364	T	3	C	14	AF=0.667	0/1/1/1	3	0.0127258	0.20607	HAPLN2
1	156608394	A	3	C	19	AF=0.667	0/1/1/1	3	0.000855446	0.0677482	None
1	156608926	T	9	C	32	AF=0.667	0/1/1/1	3	0.000430857	0.137726	None
1	156612932	T	124	C	215	AF=0.667	0/1/1/1	3	8.81659e-07	0.205063	BC005081, BCAN
1	156623894	C	2	T	14	AF=0.667	0/1/1/1	3	0.00418091	0.109353	BCAN
1	156698265	C	77	T	29	AF=0.333	0/1/1/1	3	3.45256e-06	0.216629	RRNAD1
1	156713558	G	2078	A	1033	AF=0.333	0/1/1/1	3	1.13432e-79	0.924234	HDGF
1	156752612	T	6	A	17	AF=0.667	0/1/1/1	3	0.0346897	0.516661	PRCC
1	156784982	T	25	C	44	AF=0.667	0/1/1/1	3	0.0294935	0.610745	SH2D2A
1	156848995	C	84	T	135	AF=0.667	0/1/1/1	3	0.000692998	0.115039	NTRK1
1	156885767	A	94	G	47	AF=0.333	0/1/1/1	3	9.33449e-05	1	PEAR1
1	156905584	A	45	G	17	AF=0.333	0/1/1/1	3	0.000497092	0.349211	ARHGEF11
1	158581510	T	21	C	42	AF=0.667	0/1/1/1	3	0.0111414	1	SPTA1
1	158582426	G	13	A	4	AF=0.333	0/1/1/1	3	0.0490417	0.453466	SPTA1
1	158586966	A	30	T	12	AF=0.333	0/1/1/1	3	0.0079159	0.624072	SPTA1
1	158588916	C	3	G	17	AF=0.667	0/1/1/1	3	0.00257683	0.0981777	SPTA1
1	158591523	C	13	G	45	AF=0.667	0/1/1/1	3	3.01159e-05	0.0938838	SPTA1
1	158591731	T	9	A	24	AF=0.667	0/1/1/1	3	0.013531	0.580442	SPTA1
1	158606449	G	80	T	153	AF=0.667	0/1/1/1	3	1.99407e-06	0.728699	SPTA1
1	158607935	T	181	G	85	AF=0.333	0/1/1/1	3	3.91194e-09	0.696363	SPTA1
1	158608412	T	12	C	26	AF=0.667	0/1/1/1	3	0.0335524	1	SPTA1
1	158631171	A	107	C	42	AF=0.333	0/1/1/1	3	1.00129e-07	0.193396	SPTA1
1	159996066	C	8	T	26	AF=0.667	0/1/1/1	3	0.00293506	0.2766	None
1	160210727	C	1	A	9	AF=0.667	0/1/1/1	3	0.0214844	0.180663	DCAF8
1	160267555	G	29	A	11	AF=0.333	0/1/1/1	3	0.00642658	0.504779	COPA
1	160295829	C	32	T	12	AF=0.333	0/1/1/1	3	0.00365777	0.429182	COPA
1	160317021	C	5	T	17	AF=0.667	0/1/1/1	3	0.0169005	0.369388	NCSTN
1	161575447	T	55	G	31	AF=0.333	0/1/1/1	3	0.0126725	0.569774	None
1	161696782	G	1	C	12	AF=0.667	0/1/1/1	3	0.00341797	0.0731862	FCRLB
1	161697319	G	19	A	6	AF=0.333	0/1/1/1	3	0.0146333	0.399621	FCRLB
1	161718949	G	34	T	64	AF=0.667	0/1/1/1	3	0.00318868	0.749144	None
1	161751741	A	145	G	243	AF=0.667	0/1/1/1	3	7.43689e-07	0.094876	ATF6
1	162367071	C	166	T	47	AF=0.25	0/1/1/1	4	9.11852e-17	0.343229	SH2D1B
1	162368357	C	0	T	10	AF=0.75	0/1/1/1	4	0.00195312	0.0760412	SH2D1B
1	162381833	C	15	G	71	AF=0.75	0/1/1/1	4	7.07606e-10	0.134011	SH2D1B
1	163269081	G	0	T	10	AF=0.75	0/1/1/1	4	0.00195312	0.0760412	RGS5
1	163269740	T	1	C	10	AF=0.75	0/1/1/1	4	0.0117188	0.311724	RGS5
1	163273585	T	0	C	11	AF=0.75	0/1/1/1	4	0.000976562	0.0765626	RGS5
1	163273750	A	0	G	11	AF=0.75	0/1/1/1	4	0.000976562	0.0765626	RGS5
1	163274711	T	1	G	9	AF=0.75	0/1/1/1	4	0.0214844	0.46815	RGS5
1	163278045	T	0	C	10	AF=0.75	0/1/1/1	4	0.00195312	0.0760412	RGS5
1	163281090	C	0	T	11	AF=0.75	0/1/1/1	4	0.000976562	0.0765626	RGS5
1	163286765	A	6	G	35	AF=0.75	0/1/1/1	4	4.8736e-06	0.149623	RGS5
1	163286833	A	9	G	29	AF=0.75	0/1/1/1	4	0.00165805	1	RGS5
1	163292217	T	0	C	11	AF=0.75	0/1/1/1	4	0.000976562	0.0765626	NUF2
1	163302789	T	1	C	11	AF=0.75	0/1/1/1	4	0.00634766	0.316025	NUF2
1	163309219	A	293	T	86	AF=0.25	0/1/1/1	4	1.56364e-27	0.313722	NUF2
1	163322033	A	14	G	4	AF=0.25	0/1/1/1	4	0.0308838	1	NUF2
1	165600146	G	5	A	29	AF=0.75	0/1/1/1	4	3.85582e-05	0.233095	MGST3
1	165652273	A	37	G	98	AF=0.75	0/1/1/1	4	1.50209e-07	0.550806	ALDH9A1
1	165800009	A	0	G	11	AF=0.75	0/1/1/1	4	0.000976562	0.0765626	UCK2
1	165807812	T	34	G	6	AF=0.25	0/1/1/1	4	8.36458e-06	0.199456	UCK2
1	165877575	A	22	C	57	AF=0.75	0/1/1/1	4	0.000102596	0.603064	UCK2
1	166826752	A	41	G	145	AF=0.75	0/1/1/1	4	8.03898e-15	0.397174	TADA1
1	167391498	G	15	A	41	AF=0.75	0/1/1/1	4	0.000685564	0.758195	POU2F1
1	167395802	A	53	G	13	AF=0.25	0/1/1/1	4	7.23718e-07	0.393757	POU2F1
1	167510837	T	492	C	1633	AF=0.75	0/1/1/1	4	2.91181e-142	0.0506868	CREG1
1	167510996	G	403	A	1150	AF=0.75	0/1/1/1	4	3.16533e-83	0.395447	CREG1
1	167511035	C	553	G	1524	AF=0.75	0/1/1/1	4	1.87588e-104	0.0895644	CREG1
1	167512477	C	5	T	31	AF=0.75	0/1/1/1	4	1.29135e-05	0.175674	CREG1
1	167512558	T	6	G	36	AF=0.75	0/1/1/1	4	2.82888e-06	0.151885	CREG1
1	167512580	G	6	T	36	AF=0.75	0/1/1/1	4	2.82888e-06	0.151885	CREG1
1	167515272	T	6	C	37	AF=0.75	0/1/1/1	4	1.63612e-06	0.112534	CREG1
1	167580349	T	16	C	5	AF=0.25	0/1/1/1	4	0.0266037	1	None
1	167600864	A	61	G	17	AF=0.25	0/1/1/1	4	5.66374e-07	0.601395	RCSD1
1	167602030	T	20	C	5	AF=0.25	0/1/1/1	4	0.00407732	0.651772	RCSD1
1	167607340	C	30	T	6	AF=0.25	0/1/1/1	4	6.96017e-05	0.335455	RCSD1
1	167611370	A	81	C	25	AF=0.25	0/1/1/1	4	4.47937e-08	0.822734	RCSD1
1	167611909	C	49	T	13	AF=0.25	0/1/1/1	4	4.81752e-06	0.557948	RCSD1
1	167616838	C	28	A	8	AF=0.25	0/1/1/1	4	0.00119324	0.847979	RCSD1
1	167632271	A	8	G	27	AF=0.75	0/1/1/1	4	0.00187823	1	RCSD1
1	167640122	C	0	T	10	AF=0.75	0/1/1/1	4	0.00195312	0.0760412	RCSD1
1	167674653	C	416	G	137	AF=0.25	0/1/1/1	4	1.12452e-33	0.921859	RCSD1
1	167848634	T	22	G	8	AF=0.25	0/1/1/1	4	0.0161248	0.833764	ADCY10
1	167851999	C	18	T	5	AF=0.25	0/1/1/1	4	0.010622	1	ADCY10
1	168013850	T	440	C	175	AF=0.25	0/1/1/1	4	2.78552e-27	0.0504567	DCAF6
1	168170018	T	135	A	58	AF=0.25	0/1/1/1	4	2.97179e-08	0.113969	TIPRL
1	168215499	C	52	A	23	AF=0.25	0/1/1/1	4	0.00107952	0.285347	ANKRD36BP1, TBX19
1	168215575	G	110	A	36	AF=0.25	0/1/1/1	4	6.54726e-10	1	ANKRD36BP1, TBX19
1	168221986	G	33	T	10	AF=0.25	0/1/1/1	4	0.000606107	1	TBX19
1	169337376	C	100	T	45	AF=0.25	0/1/1/1	4	5.72317e-06	0.102661	BLZF1
1	169363569	C	1	G	16	AF=0.75	0/1/1/1	4	0.000274658	0.0903498	BLZF1
1	169436546	T	44	C	13	AF=0.25	0/1/1/1	4	4.71044e-05	0.762177	SLC19A2
1	169436603	C	36	G	14	AF=0.25	0/1/1/1	4	0.00260217	0.625166	SLC19A2
1	169441188	A	5	G	32	AF=0.75	0/1/1/1	4	7.42753e-06	0.128796	SLC19A2
1	169457028	A	38	G	13	AF=0.25	0/1/1/1	4	0.000621043	1	None
1	169762807	T	42	G	22	AF=0.25	0/1/1/1	4	0.0168582	0.0848669	C1orf112, METTL18
1	171453707	C	0	T	10	AF=0.75	0/1/1/1	4	0.00195312	0.0760412	None
1	171534617	C	1	T	15	AF=0.75	0/1/1/1	4	0.000518799	0.143034	PRRC2C
1	171547134	C	1	T	12	AF=0.75	0/1/1/1	4	0.00341797	0.206918	PRRC2C
1	171670823	T	30	A	94	AF=0.75	0/1/1/1	4	7.11531e-09	0.917504	VAMP4
1	171671463	T	3	G	15	AF=0.75	0/1/1/1	4	0.00753784	0.588238	VAMP4
1	171673236	G	26	A	48	AF=0.75	0/1/1/1	4	0.01408	0.0588599	VAMP4
1	171673272	C	37	A	91	AF=0.75	0/1/1/1	4	2.00613e-06	0.308064	VAMP4
1	171711152	A	13	C	46	AF=0.75	0/1/1/1	4	1.91678e-05	0.655168	VAMP4
1	171714002	T	0	G	10	AF=0.75	0/1/1/1	4	0.00195312	0.0760412	None
1	171751051	A	78	G	278	AF=0.75	0/1/1/1	4	1.87134e-27	0.198525	METTL13
1	171755170	G	67	A	233	AF=0.75	0/1/1/1	4	1.18807e-22	0.317222	METTL13
1	171765591	G	14	A	29	AF=0.75	0/1/1/1	4	0.0315395	0.289375	AK094818, METTL13
1	171766696	A	40	G	117	AF=0.75	0/1/1/1	4	5.94825e-10	0.926562	AK094818, METTL13
1	172363524	C	15	T	5	AF=0.25	0/1/1/1	4	0.0413895	1	DNM3, PIGC
1	172368967	T	7	C	35	AF=0.75	0/1/1/1	4	1.50972e-05	0.284185	DNM3, PIGC
1	173328189	T	0	A	11	AF=0.75	0/1/1/1	4	0.000976562	0.0765626	LOC100506023
1	173387331	A	8	C	27	AF=0.75	0/1/1/1	4	0.00187823	1	BC136808, LOC100506023
1	173423799	G	0	A	10	AF=0.75	0/1/1/1	4	0.00195312	0.0760412	BC136808, LOC100506023
1	173429995	G	6	A	18	AF=0.75	0/1/1/1	4	0.0226558	1	BC136808, LOC100506023
1	173448495	A	47	G	12	AF=0.25	0/1/1/1	4	5.12563e-06	0.455845	PRDX6
1	173449036	G	62	A	19	AF=0.25	0/1/1/1	4	1.77307e-06	0.798997	PRDX6
1	173764414	A	53	G	10	AF=0.25	0/1/1/1	4	3.38217e-08	0.109151	None
1	173767443	A	21	T	8	AF=0.25	0/1/1/1	4	0.0241195	0.83007	None
1	173829180	G	5	C	15	AF=0.75	0/1/1/1	4	0.0413895	1	None
1	173832101	G	4	A	17	AF=0.75	0/1/1/1	4	0.00719738	0.623791	None
1	173832118	A	21	G	4	AF=0.25	0/1/1/1	4	0.000910521	0.363179	None
1	173832336	C	54	T	12	AF=0.25	0/1/1/1	4	1.69449e-07	0.254766	None
1	173871279	A	8	C	44	AF=0.75	0/1/1/1	4	4.03932e-07	0.147771	None
1	173904884	G	49	T	11	AF=0.25	0/1/1/1	4	7.56128e-07	0.296175	RC3H1
1	174188285	G	60	A	31	AF=0.25	0/1/1/1	4	0.00311269	0.0523833	RABGAP1L
1	174210910	G	1	A	11	AF=0.75	0/1/1/1	4	0.00634766	0.316025	RABGAP1L
1	174373449	G	15	A	5	AF=0.25	0/1/1/1	4	0.0413895	1	RABGAP1L
1	174804531	T	0	C	10	AF=0.75	0/1/1/1	4	0.00195312	0.0760412	RABGAP1L
1	174955075	C	0	T	11	AF=0.75	0/1/1/1	4	0.000976562	0.0765626	RABGAP1L
1	174970505	G	1	T	12	AF=0.75	0/1/1/1	4	0.00341797	0.206918	CACYBP
1	174983633	T	136	C	40	AF=0.25	0/1/1/1	4	1.94479e-13	0.542492	MRPS14
1	176043089	G	1	C	15	AF=0.75	0/1/1/1	4	0.000518799	0.143034	RFWD2
1	176850216	C	1	T	11	AF=0.75	0/1/1/1	4	0.00634766	0.316025	ASTN1
1	179042227	T	159	C	65	AF=0.25	0/1/1/1	4	2.85026e-10	0.165338	FAM20B
1	179043539	T	194	G	62	AF=0.25	0/1/1/1	4	5.17036e-17	0.828679	FAM20B
1	179044723	A	88	G	220	AF=0.75	0/1/1/1	4	3.3797e-14	0.148073	FAM20B
1	179045500	C	150	A	57	AF=0.25	0/1/1/1	4	7.75457e-11	0.42203	FAM20B
1	179065125	C	13	T	4	AF=0.25	0/1/1/1	4	0.0490417	1	TOR3A
1	179068851	A	13	G	43	AF=0.75	0/1/1/1	4	7.33322e-05	0.877675	ABL2
1	179072966	C	23	T	72	AF=0.75	0/1/1/1	4	4.75748e-07	1	ABL2
1	179075719	A	7	T	32	AF=0.75	0/1/1/1	4	7.02548e-05	0.359996	ABL2
1	179312752	C	77	T	26	AF=0.25	0/1/1/1	4	4.94548e-07	1	SOAT1
1	179324553	T	35	G	8	AF=0.25	0/1/1/1	4	4.19342e-05	0.383144	SOAT1
1	179326393	A	26	G	8	AF=0.25	0/1/1/1	4	0.00293506	1	SOAT1
1	179326397	C	27	G	8	AF=0.25	0/1/1/1	4	0.00187823	1	SOAT1
1	179327591	A	40	T	12	AF=0.25	0/1/1/1	4	0.000127539	0.87312	SOAT1
1	179811138	C	118	T	33	AF=0.25	0/1/1/1	4	2.04515e-12	0.399023	TOR1AIP2
1	179811936	T	40	C	9	AF=0.25	0/1/1/1	4	9.26355e-06	0.325743	TOR1AIP2
1	179813499	G	34	A	13	AF=0.25	0/1/1/1	4	0.00308768	0.736031	TOR1AIP2
1	180013235	T	40	G	16	AF=0.25	0/1/1/1	4	0.00184155	0.538122	CEP350
1	180124288	G	91	C	37	AF=0.25	0/1/1/1	4	2.00613e-06	0.308064	QSOX1
1	180141842	C	2	A	16	AF=0.75	0/1/1/1	4	0.00131226	0.27429	QSOX1
1	180145968	A	5	G	30	AF=0.75	0/1/1/1	4	2.23615e-05	0.173192	QSOX1
1	180150902	A	0	G	10	AF=0.75	0/1/1/1	4	0.00195312	0.0760412	AX747393, QSOX1
1	180165091	A	0	G	11	AF=0.75	0/1/1/1	4	0.000976562	0.0765626	QSOX1
1	180250160	T	9	C	39	AF=0.75	0/1/1/1	4	1.52218e-05	0.40472	None
1	180260393	T	0	C	11	AF=0.75	0/1/1/1	4	0.000976562	0.0765626	ACBD6
1	180292632	T	0	C	11	AF=0.75	0/1/1/1	4	0.000976562	0.0765626	ACBD6
1	180611883	G	0	A	10	AF=0.75	0/1/1/1	4	0.00195312	0.0760412	XPR1
1	180853815	T	5	C	21	AF=0.75	0/1/1/1	4	0.00249392	0.65199	XPR1
1	180859368	T	3	G	17	AF=0.75	0/1/1/1	4	0.00257683	0.439374	XPR1
1	180928507	A	13	G	4	AF=0.25	0/1/1/1	4	0.0490417	1	AK056657
1	180953853	A	114	G	36	AF=0.25	0/1/1/1	4	1.22302e-10	0.850568	STX6
1	181058313	G	105	A	44	AF=0.25	0/1/1/1	4	6.25618e-07	0.218353	IER5
1	182354850	A	103	G	341	AF=0.75	0/1/1/1	4	7.87651e-31	0.411084	GLUL
1	182355046	A	39	G	150	AF=0.75	0/1/1/1	4	1.49674e-16	0.179256	GLUL
1	182358437	T	20	C	54	AF=0.75	0/1/1/1	4	9.61299e-05	0.687728	GLUL
1	182359578	A	59	C	230	AF=0.75	0/1/1/1	4	5.20734e-25	0.0771961	GLUL
1	182360169	T	1	G	13	AF=0.75	0/1/1/1	4	0.00183105	0.212637	GLUL
1	182360202	A	1	C	16	AF=0.75	0/1/1/1	4	0.000274658	0.0903498	GLUL
1	182360223	G	2	T	19	AF=0.75	0/1/1/1	4	0.000221252	0.13067	GLUL
1	182361506	C	0	T	11	AF=0.75	0/1/1/1	4	0.000976562	0.0765626	None
1	183521283	C	204	T	78	AF=0.25	0/1/1/1	4	3.65366e-14	0.302633	SMG7
1	183596136	A	379	G	151	AF=0.25	0/1/1/1	4	1.24104e-23	0.0707813	ARPC5
1	183986897	A	19	G	4	AF=0.25	0/1/1/1	4	0.00259948	0.479516	COLGALT2
1	184764681	G	58	A	167	AF=0.75	0/1/1/1	4	2.0062e-13	0.817336	FAM129A
1	184765072	A	30	G	72	AF=0.75	0/1/1/1	4	3.88501e-05	0.304275	FAM129A
1	184836635	G	16	A	5	AF=0.25	0/1/1/1	4	0.0266037	1	FAM129A
1	184836649	A	16	G	5	AF=0.25	0/1/1/1	4	0.0266037	1	FAM129A
1	184938509	G	7	T	26	AF=0.75	0/1/1/1	4	0.00131873	0.692949	FAM129A
1	184939631	G	1	A	11	AF=0.75	0/1/1/1	4	0.00634766	0.316025	FAM129A
1	184942020	A	1	G	17	AF=0.75	0/1/1/1	4	0.000144958	0.0588118	FAM129A
1	185272483	C	70	T	31	AF=0.25	0/1/1/1	4	0.000130822	0.205626	IVNS1ABP
1	185275103	T	34	C	120	AF=0.75	0/1/1/1	4	1.89531e-12	0.456726	IVNS1ABP
1	186379733	G	12	A	27	AF=0.75	0/1/1/1	4	0.0237027	0.458669	C1orf27, MIR548F1
1	187377155	G	0	A	10	AF=0.75	0/1/1/1	4	0.00195312	0.0760412	None
1	189208680	C	0	A	10	AF=0.75	0/1/1/1	4	0.00195312	0.0760412	None
1	193054485	T	35	C	146	AF=0.75	0/1/1/1	4	2.55646e-17	0.0857877	TROVE2
1	193057971	T	14	A	37	AF=0.75	0/1/1/1	4	0.0017692	0.74624	AK022030, TROVE2
1	193074371	A	2	G	10	AF=0.75	0/1/1/1	4	0.0385742	0.741896	GLRX2
1	193089827	T	19	G	40	AF=0.75	0/1/1/1	4	0.0086415	0.228022	None
1	193090865	C	2	A	18	AF=0.75	0/1/1/1	4	0.000402451	0.193072	None
1	193166683	A	0	G	11	AF=0.75	0/1/1/1	4	0.000976562	0.0765626	CDC73
1	193202953	G	1	A	15	AF=0.75	0/1/1/1	4	0.000518799	0.143034	CDC73
1	194614593	G	3	A	22	AF=0.75	0/1/1/1	4	0.000156522	0.167542	None
1	194697850	G	0	A	10	AF=0.75	0/1/1/1	4	0.00195312	0.0760412	None
1	194699948	A	0	T	10	AF=0.75	0/1/1/1	4	0.00195312	0.0760412	None
1	194710097	A	0	T	10	AF=0.75	0/1/1/1	4	0.00195312	0.0760412	None
1	194733444	C	0	G	11	AF=0.75	0/1/1/1	4	0.000976562	0.0765626	None
1	194738177	A	0	G	11	AF=0.75	0/1/1/1	4	0.000976562	0.0765626	None
1	194808359	C	0	T	11	AF=0.75	0/1/1/1	4	0.000976562	0.0765626	None
1	196655280	C	7	G	25	AF=0.75	0/1/1/1	4	0.0021024	0.838959	CFH
1	196659753	T	12	C	30	AF=0.75	0/1/1/1	4	0.0079159	0.594199	CFH, CFHR4
1	196662459	T	1	C	10	AF=0.75	0/1/1/1	4	0.0117188	0.311724	CFH, CFHR4
1	196663016	G	4	A	16	AF=0.75	0/1/1/1	4	0.0118179	0.797669	CFH, CFHR4
1	196673430	T	0	G	11	AF=0.75	0/1/1/1	4	0.000976562	0.0765626	CFH, CFHR4
1	196676935	A	0	T	11	AF=0.75	0/1/1/1	4	0.000976562	0.0765626	CFH, CFHR4
1	196693451	A	6	G	17	AF=0.75	0/1/1/1	4	0.0346897	1	CFH, CFHR4
1	197057634	C	35	T	7	AF=0.25	0/1/1/1	4	1.50972e-05	0.284185	ASPM
1	197070442	G	95	T	259	AF=0.75	0/1/1/1	4	1.07191e-18	0.425167	ASPM
1	197070521	C	327	G	107	AF=0.25	0/1/1/1	4	5.50743e-27	0.911759	ASPM
1	197070697	T	60	C	174	AF=0.75	0/1/1/1	4	4.64735e-14	0.820952	ASPM
1	197070707	G	60	A	186	AF=0.75	0/1/1/1	4	3.44421e-16	0.883005	ASPM
1	197070711	G	197	C	60	AF=0.25	0/1/1/1	4	3.2674e-18	0.565272	ASPM
1	197073932	T	30	C	125	AF=0.75	0/1/1/1	4	5.49074e-15	0.11474	ASPM
1	197094961	T	1	A	10	AF=0.75	0/1/1/1	4	0.0117188	0.311724	ASPM
1	197960635	G	36	C	95	AF=0.75	0/1/1/1	4	2.55922e-07	0.544777	None
1	197962691	C	1	T	17	AF=0.75	0/1/1/1	4	0.000144958	0.0588118	None
1	200778953	G	3	A	24	AF=0.75	0/1/1/1	4	4.92334e-05	0.119377	CAMSAP2
1	200939642	C	15	T	35	AF=0.75	0/1/1/1	4	0.00660045	0.415603	KIF21B
1	200940180	G	61	A	21	AF=0.25	0/1/1/1	4	1.1296e-05	0.898701	KIF21B
1	201492457	A	0	G	10	AF=0.75	0/1/1/1	4	0.00195312	0.0760412	None
1	201640266	G	0	A	11	AF=0.75	0/1/1/1	4	0.000976562	0.0765626	NAV1
1	201765094	T	0	C	10	AF=0.75	0/1/1/1	4	0.00195312	0.0760412	NAV1
1	201790826	T	8	C	25	AF=0.75	0/1/1/1	4	0.00455138	1	NAV1
1	201800868	G	11	A	24	AF=0.75	0/1/1/1	4	0.0409596	0.433903	IPO9
1	201830247	T	7	C	39	AF=0.75	0/1/1/1	4	1.83154e-06	0.171387	IPO9
1	201838107	G	5	A	16	AF=0.75	0/1/1/1	4	0.0266037	1	IPO9
1	201845575	C	95	A	230	AF=0.75	0/1/1/1	4	4.58138e-14	0.0835808	IPO9
1	201849926	A	40	G	6	AF=0.25	0/1/1/1	4	3.1028e-07	0.0621056	IPO9
1	201850057	T	7	C	36	AF=0.75	0/1/1/1	4	8.96304e-06	0.219851	IPO9
1	201959455	G	22	T	83	AF=0.75	0/1/1/1	4	1.61795e-09	0.369111	RNPEP
1	201960079	T	27	C	98	AF=0.75	0/1/1/1	4	1.17845e-10	0.41028	RNPEP
1	201960320	A	44	G	20	AF=0.25	0/1/1/1	4	0.00368996	0.249543	RNPEP
1	201960453	G	20	A	73	AF=0.75	0/1/1/1	4	2.92014e-08	0.474783	RNPEP
1	201961711	G	21	A	5	AF=0.25	0/1/1/1	4	0.00249392	0.65199	RNPEP
1	201964631	C	19	T	6	AF=0.25	0/1/1/1	4	0.0146333	1	RNPEP
1	202129826	T	29	C	77	AF=0.75	0/1/1/1	4	3.45256e-06	0.575464	PTPN7
1	202136137	G	23	T	91	AF=0.75	0/1/1/1	4	9.29097e-11	0.279134	None
1	202136988	G	4	A	31	AF=0.75	0/1/1/1	4	3.46545e-06	0.0773351	None
1	202139101	C	34	G	80	AF=0.75	0/1/1/1	4	1.95964e-05	0.234961	PTPRVP
1	202139481	A	0	G	11	AF=0.75	0/1/1/1	4	0.000976562	0.0765626	PTPRVP
1	202140315	A	34	C	122	AF=0.75	0/1/1/1	4	7.71416e-13	0.405388	PTPRVP
1	202143512	A	0	G	10	AF=0.75	0/1/1/1	4	0.00195312	0.0760412	PTPRVP
1	202154366	G	3	A	20	AF=0.75	0/1/1/1	4	0.000488281	0.23328	PTPRVP
1	202550272	G	22	A	48	AF=0.75	0/1/1/1	4	0.00254756	0.215459	PPP1R12B
1	202554937	T	24	C	6	AF=0.25	0/1/1/1	4	0.00143091	0.674455	PPP1R12B
1	202849723	G	33	A	13	AF=0.25	0/1/1/1	4	0.00453386	0.6106	RABIF
1	202861342	A	47	G	150	AF=0.75	0/1/1/1	4	9.73841e-14	0.742861	KLHL12
1	202878808	C	20	T	74	AF=0.75	0/1/1/1	4	1.84612e-08	0.475044	KLHL12
1	202892917	T	0	C	10	AF=0.75	0/1/1/1	4	0.00195312	0.0760412	KLHL12
1	202916806	C	8	T	34	AF=0.75	0/1/1/1	4	6.87711e-05	0.476492	ADIPOR1
1	202929586	T	0	C	10	AF=0.75	0/1/1/1	4	0.00195312	0.0760412	None
1	202935911	T	55	C	148	AF=0.75	0/1/1/1	4	4.89949e-11	0.516619	CYB5R1
1	202993848	G	41	A	16	AF=0.25	0/1/1/1	4	0.00126356	0.646091	None
1	203652444	A	75	G	36	AF=0.25	0/1/1/1	4	0.000271818	0.0790439	ATP2B4
1	203709034	A	138	G	42	AF=0.25	0/1/1/1	4	3.84417e-13	0.667132	ATP2B4
1	203709068	T	126	C	53	AF=0.25	0/1/1/1	4	4.86832e-08	0.166939	ATP2B4
1	203713133	G	24	A	10	AF=0.25	0/1/1/1	4	0.0243065	0.554072	ATP2B4
1	203766827	T	49	C	108	AF=0.75	0/1/1/1	4	2.84431e-06	0.0796322	ZBED6, ZC3H11A
1	203785948	C	0	T	10	AF=0.75	0/1/1/1	4	0.00195312	0.0760412	ZC3H11A
1	203832660	G	19	T	48	AF=0.75	0/1/1/1	4	0.000521613	0.572243	SNRPE
1	203838099	G	0	A	11	AF=0.75	0/1/1/1	4	0.000976562	0.0765626	SNRPE
1	203842596	A	0	G	11	AF=0.75	0/1/1/1	4	0.000976562	0.0765626	None
1	204499880	A	62	T	151	AF=0.75	0/1/1/1	4	9.43374e-10	0.178308	MDM4
1	204519882	G	33	A	87	AF=0.75	0/1/1/1	4	8.6805e-07	0.527584	MDM4
1	204521577	G	8	A	27	AF=0.75	0/1/1/1	4	0.00187823	1	MDM4
1	205055949	G	44	A	14	AF=0.25	0/1/1/1	4	0.000100497	1	RBBP5
1	205113595	A	105	C	41	AF=0.25	0/1/1/1	4	1.17304e-07	0.390249	DSTYK
1	205113596	G	105	A	41	AF=0.25	0/1/1/1	4	1.17304e-07	0.390249	DSTYK
1	205116635	A	41	T	7	AF=0.25	0/1/1/1	4	6.24041e-07	0.131585	DSTYK
1	205413560	G	0	A	11	AF=0.75	0/1/1/1	4	0.000976562	0.0765626	None
1	205414766	G	0	C	11	AF=0.75	0/1/1/1	4	0.000976562	0.0765626	None
1	205599771	T	29	C	15	AF=0.25	0/1/1/1	4	0.0487668	0.16585	ELK4, SLC45A3
1	205600275	G	17	T	5	AF=0.25	0/1/1/1	4	0.0169005	1	ELK4, SLC45A3
1	205683355	T	320	G	870	AF=0.75	0/1/1/1	4	3.63872e-59	0.132076	NUCKS1
1	205718858	A	21	T	9	AF=0.25	0/1/1/1	4	0.0427739	0.528999	NUCKS1
1	205737739	G	13	A	38	AF=0.75	0/1/1/1	4	0.000621043	1	RAB7L1
1	205738302	G	78	A	38	AF=0.25	0/1/1/1	4	0.000258261	0.067487	RAB7L1
1	205767885	G	31	A	7	AF=0.25	0/1/1/1	4	0.000116167	0.4541	SLC41A1
1	206627177	G	32	A	13	AF=0.25	0/1/1/1	4	0.00660882	0.605173	SRGAP2
1	206637133	C	17	T	5	AF=0.25	0/1/1/1	4	0.0169005	1	SRGAP2
1	206669958	G	4	A	13	AF=0.75	0/1/1/1	4	0.0490417	1	IKBKE
1	206760474	T	72	C	177	AF=0.75	0/1/1/1	4	2.21928e-11	0.164158	RASSF5
1	206768373	A	40	G	93	AF=0.75	0/1/1/1	4	4.95086e-06	0.192546	EIF2D
1	206779916	A	2	G	16	AF=0.75	0/1/1/1	4	0.00131226	0.27429	EIF2D
1	206884120	A	0	C	10	AF=0.75	0/1/1/1	4	0.00195312	0.0760412	MAPKAPK2
1	206910867	C	0	T	10	AF=0.75	0/1/1/1	4	0.00195312	0.0760412	None
1	207249855	G	16	A	68	AF=0.75	0/1/1/1	4	8.54234e-09	0.256259	PFKFB2
1	207253031	C	1	T	12	AF=0.75	0/1/1/1	4	0.00341797	0.206918	PFKFB2
1	207529576	T	0	G	11	AF=0.75	0/1/1/1	4	0.000976562	0.0765626	CD55
1	207885845	A	3	G	13	AF=0.75	0/1/1/1	4	0.0212708	0.774801	CR1L
1	207899976	C	37	T	8	AF=0.25	0/1/1/1	4	1.53741e-05	0.305189	None
1	207931913	G	2	A	23	AF=0.75	0/1/1/1	4	1.94311e-05	0.0617784	CD46
1	207933246	T	62	G	30	AF=0.25	0/1/1/1	4	0.00111093	0.093019	CD46
1	207933577	T	5	G	28	AF=0.75	0/1/1/1	4	6.61877e-05	0.230913	CD46
1	207933648	T	33	C	82	AF=0.75	0/1/1/1	4	5.57142e-06	0.388628	CD46
1	207957555	T	38	C	10	AF=0.25	0/1/1/1	4	6.16964e-05	0.617767	CD46
1	207959665	A	2	G	13	AF=0.75	0/1/1/1	4	0.00738525	0.384456	CD46
1	207965427	G	57	A	21	AF=0.25	0/1/1/1	4	5.57112e-05	0.695401	CD46
1	207966393	G	98	A	36	AF=0.25	0/1/1/1	4	8.10907e-08	0.618322	CD46
1	209952865	C	9	G	38	AF=0.75	0/1/1/1	4	2.4904e-05	0.403982	TRAF3IP3
1	210698391	C	0	T	10	AF=0.75	0/1/1/1	4	0.00195312	0.0760412	HHAT
1	210699305	C	0	T	10	AF=0.75	0/1/1/1	4	0.00195312	0.0760412	HHAT
1	210717222	G	0	A	10	AF=0.75	0/1/1/1	4	0.00195312	0.0760412	HHAT
1	210726291	G	13	A	35	AF=0.75	0/1/1/1	4	0.00208811	0.739599	HHAT
1	211451467	T	123	C	37	AF=0.25	0/1/1/1	4	5.46769e-12	0.648277	RCOR3
1	211547522	T	10	C	30	AF=0.75	0/1/1/1	4	0.00222143	1	TRAF5
1	211836789	T	489	C	141	AF=0.25	0/1/1/1	4	7.12078e-46	0.140834	NEK2
1	211837911	C	63	T	16	AF=0.25	0/1/1/1	4	9.43922e-08	0.365503	NEK2
1	211838498	G	61	C	26	AF=0.25	0/1/1/1	4	0.000223689	0.321377	NEK2
1	211839312	A	14	G	70	AF=0.75	0/1/1/1	4	4.06796e-10	0.0788337	NEK2
1	211839499	G	45	A	13	AF=0.25	0/1/1/1	4	3.01159e-05	0.762208	NEK2
1	211920427	T	50	C	12	AF=0.25	0/1/1/1	4	1.21438e-06	0.378845	LPGAT1
1	211920624	G	19	A	78	AF=0.75	0/1/1/1	4	1.15342e-09	0.242159	LPGAT1
1	211921229	C	24	A	88	AF=0.75	0/1/1/1	4	8.98832e-10	0.445106	LPGAT1
1	211922014	A	56	G	14	AF=0.25	0/1/1/1	4	4.30284e-07	0.407666	LPGAT1
1	211922603	G	33	A	83	AF=0.75	0/1/1/1	4	3.86543e-06	0.391691	LPGAT1
1	212273639	C	310	T	101	AF=0.25	0/1/1/1	4	8.649e-26	0.864531	DTL
1	212623690	T	0	C	10	AF=0.75	0/1/1/1	4	0.00195312	0.0760412	None
1	212785577	A	2	T	13	AF=0.75	0/1/1/1	4	0.00738525	0.384456	ATF3
1	212786920	G	7	A	33	AF=0.75	0/1/1/1	4	4.2277e-05	0.361088	ATF3
1	212787092	A	6	G	29	AF=0.75	0/1/1/1	4	0.000116842	0.334091	ATF3
1	212931215	T	0	C	10	AF=0.75	0/1/1/1	4	0.00195312	0.0760412	NSL1
1	212945458	T	16	C	4	AF=0.25	0/1/1/1	4	0.0118179	0.797669	NSL1
1	212963981	T	25	C	11	AF=0.25	0/1/1/1	4	0.0288167	0.443251	NSL1
1	212989356	G	81	A	26	AF=0.25	0/1/1/1	4	9.37451e-08	1	TATDN3
1	212989382	G	91	A	25	AF=0.25	0/1/1/1	4	5.31334e-10	0.453074	TATDN3
1	212989384	A	84	G	25	AF=0.25	0/1/1/1	4	1.21596e-08	0.659894	TATDN3
1	212989840	C	0	T	10	AF=0.75	0/1/1/1	4	0.00195312	0.0760412	TATDN3
1	213030462	G	52	A	14	AF=0.25	0/1/1/1	4	2.82202e-06	0.570124	FLVCR1-AS1
1	213031448	G	0	C	11	AF=0.75	0/1/1/1	4	0.000976562	0.0765626	PTPN18
1	213045186	G	0	A	11	AF=0.75	0/1/1/1	4	0.000976562	0.0765626	FLVCR1
1	213069420	C	10	T	27	AF=0.75	0/1/1/1	4	0.00763208	0.849336	FLVCR1
1	214476052	C	1	A	10	AF=0.75	0/1/1/1	4	0.0117188	0.311724	SMYD2
1	214505640	A	4	G	31	AF=0.75	0/1/1/1	4	3.46545e-06	0.0773351	SMYD2
1	214509407	C	13	A	3	AF=0.25	0/1/1/1	4	0.0212708	0.774801	SMYD2
1	214820099	A	182	G	603	AF=0.75	0/1/1/1	4	1.92275e-53	0.24866	CENPF
1	214837110	C	576	G	177	AF=0.25	0/1/1/1	4	4.47536e-50	0.354815	CENPF
1	214837210	T	150	C	429	AF=0.75	0/1/1/1	4	4.17453e-32	0.631285	CENPF
1	215165307	A	0	G	10	AF=0.75	0/1/1/1	4	0.00195312	0.0760412	None
1	219372158	G	0	A	11	AF=0.75	0/1/1/1	4	0.000976562	0.0765626	LYPLAL1
1	219377377	G	81	T	33	AF=0.25	0/1/1/1	4	8.00432e-06	0.331077	LYPLAL1
1	219427257	T	0	G	11	AF=0.75	0/1/1/1	4	0.000976562	0.0765626	None
1	219442496	T	1	A	13	AF=0.75	0/1/1/1	4	0.00183105	0.212637	None
1	219442625	A	1	G	13	AF=0.75	0/1/1/1	4	0.00183105	0.212637	None
1	220313853	G	2	A	17	AF=0.75	0/1/1/1	4	0.000728607	0.188802	IARS2
1	220375140	T	0	C	10	AF=0.75	0/1/1/1	4	0.00195312	0.0760412	RAB3GAP2
1	220382098	G	0	A	10	AF=0.75	0/1/1/1	4	0.00195312	0.0760412	RAB3GAP2
1	220442369	G	7	C	38	AF=0.75	0/1/1/1	4	3.12131e-06	0.169427	RAB3GAP2
1	223917907	A	5	G	19	AF=0.75	0/1/1/1	4	0.00661075	0.814743	CAPN2
1	223934720	G	123	A	369	AF=0.75	0/1/1/1	4	1.38841e-29	1	CAPN2
1	223941184	C	15	G	45	AF=0.75	0/1/1/1	4	0.000134514	1	CAPN2
1	223958547	A	22	G	6	AF=0.25	0/1/1/1	4	0.00371917	0.828117	CAPN2
1	223991119	G	398	T	112	AF=0.25	0/1/1/1	4	1.38928e-38	0.124854	TP53BP2
1	224027999	T	16	C	4	AF=0.25	0/1/1/1	4	0.0118179	0.797669	TP53BP2
1	224045479	C	14	T	4	AF=0.25	0/1/1/1	4	0.0308838	1	None
1	224564374	C	34	T	6	AF=0.25	0/1/1/1	4	8.36458e-06	0.199456	CNIH4
1	224575018	C	185	T	46	AF=0.25	0/1/1/1	4	6.06623e-21	0.0803339	WDR26
1	224577942	T	24	C	8	AF=0.25	0/1/1/1	4	0.00700037	1	WDR26
1	224577959	C	21	T	8	AF=0.25	0/1/1/1	4	0.0241195	0.83007	WDR26
1	224616353	C	13	G	3	AF=0.25	0/1/1/1	4	0.0212708	0.774801	WDR26
1	224647230	T	22	G	9	AF=0.25	0/1/1/1	4	0.0294494	0.677918	None
1	225156457	G	79	A	19	AF=0.25	0/1/1/1	4	7.12739e-10	0.242889	DNAH14
1	225965803	C	55	A	24	AF=0.25	0/1/1/1	4	0.000639398	0.297944	SRP9
1	226038614	A	0	T	10	AF=0.75	0/1/1/1	4	0.00195312	0.0760412	TMEM63A
1	226042790	T	15	C	5	AF=0.25	0/1/1/1	4	0.0413895	1	TMEM63A
1	226052830	A	4	G	33	AF=0.75	0/1/1/1	4	1.08439e-06	0.0555983	TMEM63A
1	226067382	G	0	A	10	AF=0.75	0/1/1/1	4	0.00195312	0.0760412	TMEM63A
1	226108200	C	196	T	61	AF=0.25	0/1/1/1	4	1.0651e-17	0.666326	LEFTY1, PYCR2
1	226171475	G	921	C	297	AF=0.25	0/1/1/1	4	1.16579e-74	0.643243	SDE2
1	226433708	T	40	C	16	AF=0.25	0/1/1/1	4	0.00184155	0.538122	LIN9
1	226472532	T	30	C	6	AF=0.25	0/1/1/1	4	6.96017e-05	0.335455	LIN9
1	226472591	C	26	T	6	AF=0.25	0/1/1/1	4	0.000535053	0.541213	LIN9
1	226474132	G	635	A	226	AF=0.25	0/1/1/1	4	1.10099e-45	0.408532	LIN9
1	227058344	A	33	G	98	AF=0.75	0/1/1/1	4	1.12992e-08	1	PSEN2
1	227069737	C	54	T	12	AF=0.25	0/1/1/1	4	1.69449e-07	0.254766	PSEN2
1	227083550	C	64	T	17	AF=0.25	0/1/1/1	4	1.42664e-07	0.443999	PSEN2
1	227171035	C	40	A	14	AF=0.25	0/1/1/1	4	0.000535436	0.875451	ADCK3
1	227505577	T	134	A	52	AF=0.25	0/1/1/1	4	1.56677e-09	0.352094	CDC42BPA
1	227843003	G	27	A	11	AF=0.25	0/1/1/1	4	0.013853	0.575544	ZNF678
1	227920061	T	49	G	154	AF=0.75	0/1/1/1	4	7.82517e-14	0.808478	JMJD4, LOC100130093, SNAP47
1	227961789	C	0	G	11	AF=0.75	0/1/1/1	4	0.000976562	0.0765626	SNAP47
1	227964399	T	6	C	19	AF=0.75	0/1/1/1	4	0.0146333	1	SNAP47
1	228271153	T	4	A	14	AF=0.75	0/1/1/1	4	0.0308838	1	ARF1
1	228331040	C	24	A	53	AF=0.75	0/1/1/1	4	0.00126323	0.235461	GUK1
1	228371754	C	34	T	9	AF=0.25	0/1/1/1	4	0.000170155	0.60203	None
1	228411255	G	21	C	5	AF=0.25	0/1/1/1	4	0.00249392	0.65199	OBSCN
1	228559994	C	6	T	17	AF=0.75	0/1/1/1	4	0.0346897	1	OBSCN
1	228588979	C	7	G	25	AF=0.75	0/1/1/1	4	0.0021024	0.838959	TRIM11
1	228645063	A	790	G	237	AF=0.25	0/1/1/1	4	5.12731e-70	0.159981	None
1	228682330	C	218	G	75	AF=0.25	0/1/1/1	4	2.42916e-17	0.839607	RNF187
1	228682535	G	89	A	332	AF=0.75	0/1/1/1	4	4.8777e-34	0.0715789	RNF187
1	229795070	T	35	G	142	AF=0.75	0/1/1/1	4	1.73242e-16	0.118139	URB2
1	229796919	C	0	A	10	AF=0.75	0/1/1/1	4	0.00195312	0.0760412	None
1	229802996	C	0	T	11	AF=0.75	0/1/1/1	4	0.000976562	0.0765626	None
1	230237377	C	1	G	11	AF=0.75	0/1/1/1	4	0.00634766	0.316025	GALNT2
1	230377187	T	2	C	10	AF=0.75	0/1/1/1	4	0.0385742	0.741896	GALNT2
1	230398102	A	26	G	72	AF=0.75	0/1/1/1	4	3.68865e-06	0.726765	GALNT2
1	230416038	G	96	A	237	AF=0.75	0/1/1/1	4	6.65714e-15	0.113484	GALNT2
1	230416744	G	57	A	149	AF=0.75	0/1/1/1	4	1.1282e-10	0.376535	GALNT2
1	230417664	C	88	G	214	AF=0.75	0/1/1/1	4	2.86752e-13	0.0970226	GALNT2
1	231113896	G	16	A	5	AF=0.25	0/1/1/1	4	0.0266037	1	TTC13
1	231172881	T	1	G	17	AF=0.75	0/1/1/1	4	0.000144958	0.0588118	FAM89A
1	231173033	C	1	T	12	AF=0.75	0/1/1/1	4	0.00341797	0.206918	FAM89A
1	231173904	A	1	G	9	AF=0.75	0/1/1/1	4	0.0214844	0.46815	FAM89A
1	231377081	C	29	T	91	AF=0.75	0/1/1/1	4	1.21871e-08	0.916148	GNPAT
1	231378504	G	0	A	10	AF=0.75	0/1/1/1	4	0.00195312	0.0760412	GNPAT
1	231401902	G	83	A	302	AF=0.75	0/1/1/1	4	2.47179e-30	0.125981	GNPAT
1	231403830	C	3	T	21	AF=0.75	0/1/1/1	4	0.000277162	0.236337	GNPAT
1	231406295	T	12	C	28	AF=0.75	0/1/1/1	4	0.016589	0.46681	GNPAT
1	231408091	A	75	G	209	AF=0.75	0/1/1/1	4	8.50645e-16	0.583777	GNPAT
1	231468953	G	27	A	9	AF=0.25	0/1/1/1	4	0.00393317	1	EXOC8
1	231470650	T	50	C	22	AF=0.25	0/1/1/1	4	0.00129358	0.277451	EXOC8
1	231487993	T	10	C	26	AF=0.75	0/1/1/1	4	0.011331	0.701387	SPRTN
1	231544585	G	0	A	10	AF=0.75	0/1/1/1	4	0.00195312	0.0760412	EGLN1
1	231554649	T	0	C	10	AF=0.75	0/1/1/1	4	0.00195312	0.0760412	EGLN1
1	231728905	C	0	A	11	AF=0.75	0/1/1/1	4	0.000976562	0.0765626	LINC00582, TSNAX-DISC1
1	233105677	G	81	A	198	AF=0.75	0/1/1/1	4	1.7967e-12	0.128068	NTPCR
1	233749021	T	0	G	10	AF=0.75	0/1/1/1	4	0.00195312	0.0760412	None
1	234515265	C	20	T	7	AF=0.25	0/1/1/1	4	0.0191573	1	COA6
1	234565877	G	35	A	127	AF=0.75	0/1/1/1	4	1.85091e-13	0.364226	TARBP1
1	235295742	A	0	C	11	AF=0.75	0/1/1/1	4	0.000976562	0.0765626	ARID4B, RBM34
1	235382775	T	23	C	4	AF=0.25	0/1/1/1	4	0.000310749	0.271571	ARID4B
1	235492972	T	103	G	38	AF=0.25	0/1/1/1	4	4.09805e-08	0.626692	GGPS1
1	235506853	G	66	A	12	AF=0.25	0/1/1/1	4	3.48585e-10	0.0500686	GGPS1
1	235582272	A	2	G	19	AF=0.75	0/1/1/1	4	0.000221252	0.13067	TBCE
1	235593118	C	6	T	19	AF=0.75	0/1/1/1	4	0.0146333	1	TBCE
1	235992447	C	0	G	10	AF=0.75	0/1/1/1	4	0.00195312	0.0760412	LYST
1	236380913	T	2	C	17	AF=0.75	0/1/1/1	4	0.000728607	0.188802	ERO1LB
1	236381825	G	8	C	21	AF=0.75	0/1/1/1	4	0.0241195	0.83007	ERO1LB
1	236576811	T	0	C	11	AF=0.75	0/1/1/1	4	0.000976562	0.0765626	EDARADD
1	236642238	G	1	A	14	AF=0.75	0/1/1/1	4	0.000976562	0.136801	EDARADD
1	236647511	T	13	C	66	AF=0.75	0/1/1/1	4	1.07814e-09	0.0906824	EDARADD
1	236647550	C	27	G	83	AF=0.75	0/1/1/1	4	8.30992e-08	1	EDARADD
1	236649626	T	13	C	28	AF=0.75	0/1/1/1	4	0.0275332	0.366086	None
1	236650315	C	0	T	11	AF=0.75	0/1/1/1	4	0.000976562	0.0765626	None
1	237048500	A	156	G	53	AF=0.25	0/1/1/1	4	5.75415e-13	0.93633	MTR
1	237058828	C	87	T	35	AF=0.25	0/1/1/1	4	2.78788e-06	0.347399	MTR
1	237061849	G	13	A	53	AF=0.75	0/1/1/1	4	7.23718e-07	0.393757	MTR
1	237063335	G	175	C	43	AF=0.25	0/1/1/1	4	4.37118e-20	0.0723988	MTR
1	237065326	C	60	T	16	AF=0.25	0/1/1/1	4	3.85098e-07	0.5081	MTR
1	241786645	C	2	T	19	AF=0.75	0/1/1/1	4	0.000221252	0.13067	OPN3
1	241793326	A	164	G	448	AF=0.75	0/1/1/1	4	2.05501e-31	0.304614	CHML, OPN3
1	241794056	C	46	A	97	AF=0.75	0/1/1/1	4	2.40791e-05	0.0532028	CHML, OPN3
1	241796284	A	72	G	262	AF=0.75	0/1/1/1	4	1.68945e-26	0.164268	CHML, OPN3
1	241796443	T	75	C	220	AF=0.75	0/1/1/1	4	1.08821e-17	0.89303	CHML, OPN3
1	241801165	C	3	G	14	AF=0.75	0/1/1/1	4	0.0127258	0.587712	OPN3
1	242011344	C	34	G	10	AF=0.25	0/1/1/1	4	0.000388131	0.862241	None
1	242012033	G	394	A	110	AF=0.25	0/1/1/1	4	1.59419e-38	0.110631	EXO1
1	242035438	G	320	A	103	AF=0.25	0/1/1/1	4	5.73632e-27	0.77924	EXO1
1	242074637	C	0	G	10	AF=0.75	0/1/1/1	4	0.00195312	0.0760412	None
1	243377219	C	0	T	11	AF=0.75	0/1/1/1	4	0.000976562	0.0765626	CEP170
1	243402721	G	0	A	10	AF=0.75	0/1/1/1	4	0.00195312	0.0760412	CEP170
1	244594969	T	0	A	10	AF=0.75	0/1/1/1	4	0.00195312	0.0760412	ADSS
1	244828033	T	1	A	14	AF=0.75	0/1/1/1	4	0.000976562	0.136801	DESI2
1	244871041	T	296	A	90	AF=0.25	0/1/1/1	4	9.51945e-27	0.480684	DESI2
1	245000664	C	47	T	9	AF=0.25	0/1/1/1	4	2.57157e-07	0.163373	COX20
1	245003551	G	26	C	5	AF=0.25	0/1/1/1	4	0.000192195	0.30486	COX20
1	245005085	G	412	C	129	AF=0.25	0/1/1/1	4	1.84501e-35	0.551741	COX20, HNRNPU-AS1
1	245005828	C	330	T	88	AF=0.25	0/1/1/1	4	5.14146e-34	0.0624678	COX20, HNRNPU-AS1
1	245009105	A	15	G	4	AF=0.25	0/1/1/1	4	0.0192108	1	HNRNPU-AS1
1	245247769	C	57	A	16	AF=0.25	0/1/1/1	4	1.52566e-06	0.591588	EFCAB2
1	245248443	C	66	G	29	AF=0.25	0/1/1/1	4	0.000186402	0.235468	EFCAB2
1	245252343	G	24	A	10	AF=0.25	0/1/1/1	4	0.0243065	0.554072	EFCAB2
1	245255683	G	4	A	14	AF=0.75	0/1/1/1	4	0.0308838	1	EFCAB2
1	245841894	A	4	G	25	AF=0.75	0/1/1/1	4	0.000103716	0.20086	KIF26B
1	245960306	G	22	A	7	AF=0.25	0/1/1/1	4	0.00813006	1	SMYD3
1	246018517	T	1	C	17	AF=0.75	0/1/1/1	4	0.000144958	0.0588118	SMYD3
1	246021150	T	4	C	22	AF=0.75	0/1/1/1	4	0.000533521	0.364811	SMYD3
1	246021155	T	2	C	23	AF=0.75	0/1/1/1	4	1.94311e-05	0.0617784	SMYD3
1	246021330	C	5	T	17	AF=0.75	0/1/1/1	4	0.0169005	1	SMYD3
1	246021496	T	3	C	16	AF=0.75	0/1/1/1	4	0.00442505	0.437969	SMYD3
1	246043567	C	2	A	14	AF=0.75	0/1/1/1	4	0.00418091	0.386766	SMYD3
1	246045242	G	0	A	10	AF=0.75	0/1/1/1	4	0.00195312	0.0760412	SMYD3
1	246618282	T	0	C	11	AF=0.75	0/1/1/1	4	0.000976562	0.0765626	SMYD3
1	246705165	A	2	C	12	AF=0.75	0/1/1/1	4	0.0129395	0.539593	TFB2M
1	246707166	C	0	T	10	AF=0.75	0/1/1/1	4	0.00195312	0.0760412	TFB2M
1	246715196	C	1	T	11	AF=0.75	0/1/1/1	4	0.00634766	0.316025	TFB2M
1	246715961	A	4	G	27	AF=0.75	0/1/1/1	4	3.39532e-05	0.14719	TFB2M
1	246716730	A	1	G	10	AF=0.75	0/1/1/1	4	0.0117188	0.311724	TFB2M
1	246776768	C	0	T	11	AF=0.75	0/1/1/1	4	0.000976562	0.0765626	CNST
1	246790248	G	0	C	11	AF=0.75	0/1/1/1	4	0.000976562	0.0765626	CNST
1	246815596	G	2	T	19	AF=0.75	0/1/1/1	4	0.000221252	0.13067	CNST
1	246829873	G	67	A	211	AF=0.75	0/1/1/1	4	1.58095e-18	0.781862	CNST
1	247006051	G	191	C	513	AF=0.75	0/1/1/1	4	6.74662e-35	0.191826	AHCTF1
1	247010598	A	2	C	19	AF=0.75	0/1/1/1	4	0.000221252	0.13067	AHCTF1
1	247010608	C	2	A	18	AF=0.75	0/1/1/1	4	0.000402451	0.193072	AHCTF1
1	247010610	A	2	C	18	AF=0.75	0/1/1/1	4	0.000402451	0.193072	AHCTF1
1	247049739	G	2	A	11	AF=0.75	0/1/1/1	4	0.0224609	0.53864	AHCTF1
1	247062339	C	0	T	10	AF=0.75	0/1/1/1	4	0.00195312	0.0760412	AHCTF1
1	247065472	A	3	G	17	AF=0.75	0/1/1/1	4	0.00257683	0.439374	AHCTF1
1	247140240	A	0	G	10	AF=0.75	0/1/1/1	4	0.00195312	0.0760412	ZNF670-ZNF695, ZNF695
1	247158777	G	0	A	10	AF=0.75	0/1/1/1	4	0.00195312	0.0760412	ZNF670-ZNF695, ZNF695
1	247352289	C	93	T	41	AF=0.25	0/1/1/1	4	8.23337e-06	0.135315	None
1	247352723	T	39	C	12	AF=0.25	0/1/1/1	4	0.000198039	1	None
1	247352823	G	22	A	7	AF=0.25	0/1/1/1	4	0.00813006	1	None
1	247353180	A	120	G	54	AF=0.25	0/1/1/1	4	6.17804e-07	0.0793945	None
1	247353330	T	340	C	107	AF=0.25	0/1/1/1	4	2.44853e-29	0.623482	None
1	247353783	T	479	C	132	AF=0.25	0/1/1/1	4	3.79022e-47	0.0553361	None
1	247354581	A	45	C	24	AF=0.25	0/1/1/1	4	0.0154323	0.0700595	None
1	247359065	C	24	T	6	AF=0.25	0/1/1/1	4	0.00143091	0.674455	None
1	247361756	C	46	T	11	AF=0.25	0/1/1/1	4	3.31188e-06	0.362056	None
1	247362329	A	33	G	7	AF=0.25	0/1/1/1	4	4.2277e-05	0.361088	None
1	247363833	T	81	A	39	AF=0.25	0/1/1/1	4	0.000158034	0.0722828	None
1	247366380	C	36	T	20	AF=0.25	0/1/1/1	4	0.0440465	0.0877513	None
1	247369356	C	25	T	10	AF=0.25	0/1/1/1	4	0.0166738	0.695958	None
1	247371077	G	20	T	4	AF=0.25	0/1/1/1	4	0.00154388	0.480444	None
1	247372009	T	47	A	18	AF=0.25	0/1/1/1	4	0.00042213	0.667228	None
1	247372163	G	23	T	10	AF=0.25	0/1/1/1	4	0.035082	0.545782	None
1	247372672	C	49	T	22	AF=0.25	0/1/1/1	4	0.0018204	0.272104	None
1	247470836	A	1	G	16	AF=0.75	0/1/1/1	4	0.000274658	0.0903498	ZNF496
1	247484478	G	13	A	4	AF=0.25	0/1/1/1	4	0.0490417	1	ZNF496
1	247494350	T	0	G	10	AF=0.75	0/1/1/1	4	0.00195312	0.0760412	ZNF496
1	247508452	G	5	A	27	AF=0.75	0/1/1/1	4	0.000113074	0.306598	None
1	248040104	C	2	T	20	AF=0.75	0/1/1/1	4	0.000121117	0.135238	TRIM58
1	248042937	C	53	T	24	AF=0.25	0/1/1/1	4	0.00126323	0.235461	TRIM58
1	248043238	C	23	T	5	AF=0.25	0/1/1/1	4	0.000912234	0.513649	TRIM58
2	257733	A	27	G	6	AF=0.333	0/0/1	3	0.000324063	0.0670486	SH3YL1
2	277003	A	1022	G	2127	AF=0.667	0/1/1	3	5.59815e-88	0.316413	ACP1
2	3383538	C	17	G	4	AF=0.333	0/0/1	3	0.00719738	0.245886	TRAPPC12
2	3392295	A	48	G	116	AF=0.667	0/1/1	3	1.11715e-07	0.282898	TRAPPC12
2	3467906	C	2	T	11	AF=0.667	0/1/1	3	0.0224609	0.242342	TRAPPC12
2	3527027	G	4	A	20	AF=0.667	0/1/1	3	0.00154388	0.126936	None
2	3589803	A	214	G	132	AF=0.333	0/0/1	3	1.22097e-05	0.0597082	None
2	3606436	G	160	C	65	AF=0.333	0/0/1	3	1.99602e-10	0.178853	LOC100506054
2	3625038	G	47	T	17	AF=0.333	0/0/1	3	0.000226882	0.289747	RPS7
2	7164578	A	19	G	47	AF=0.667	0/1/1	3	0.000756107	0.514216	RNF144A
2	7182817	T	12	C	25	AF=0.667	0/1/1	3	0.047031	1	RNF144A
2	7183214	C	16	G	31	AF=0.667	0/1/1	3	0.0399861	0.878469	RNF144A
2	9984714	T	27	G	7	AF=0.333	0/0/1	3	0.000821395	0.145148	TAF1B
2	10095185	T	31	C	13	AF=0.333	0/0/1	3	0.00955988	0.749257	BC051708, GRHL1
2	10142073	T	54	C	25	AF=0.333	0/0/1	3	0.00146607	0.812076	GRHL1
2	10287269	G	40	A	11	AF=0.333	0/0/1	3	5.70381e-05	0.100887	C2orf48
2	10287296	A	56	T	23	AF=0.333	0/0/1	3	0.000263637	0.47525	C2orf48
2	10288012	C	15	T	4	AF=0.333	0/0/1	3	0.0192108	0.334181	C2orf48
2	10291279	A	15	G	3	AF=0.333	0/0/1	3	0.00753784	0.209209	C2orf48
2	10293622	G	20	C	5	AF=0.333	0/0/1	3	0.00407732	0.203802	C2orf48
2	10344944	C	2	T	15	AF=0.667	0/1/1	3	0.00234985	0.0715024	C2orf48
2	10347737	T	9	C	27	AF=0.667	0/1/1	3	0.00393317	0.376869	C2orf48
2	10453849	G	16	A	4	AF=0.333	0/0/1	3	0.0118179	0.243595	HPCAL1
2	10454622	G	24	A	8	AF=0.333	0/0/1	3	0.00700037	0.355135	HPCAL1
2	10563236	G	4	A	16	AF=0.667	0/1/1	3	0.0118179	0.243595	HPCAL1
2	10582790	T	10	C	26	AF=0.667	0/1/1	3	0.011331	0.596626	ODC1
2	10585302	T	838	C	1570	AF=0.667	0/1/1	3	5.8997e-51	0.119566	ODC1
2	10586660	A	2	G	10	AF=0.667	0/1/1	3	0.0385742	0.358815	ODC1
2	10586790	A	2	G	11	AF=0.667	0/1/1	3	0.0224609	0.242342	ODC1
2	10729554	A	12	T	26	AF=0.667	0/1/1	3	0.0335524	1	NOL10
2	11320874	A	65	T	27	AF=0.333	0/0/1	3	9.26404e-05	0.441488	None
2	11321880	C	65	T	23	AF=0.333	0/0/1	3	8.50111e-06	0.174882	ROCK2
2	12701327	A	15	C	36	AF=0.667	0/1/1	3	0.00460131	0.656428	AK001558
2	12708007	G	18	C	36	AF=0.667	0/1/1	3	0.0198343	1	AK001558
2	15314617	C	20	G	8	AF=0.333	0/0/1	3	0.0356981	0.691405	NBAS
2	15372562	C	149	T	310	AF=0.667	0/1/1	3	4.49188e-14	0.729006	NBAS
2	17940114	C	4	T	15	AF=0.667	0/1/1	3	0.0192108	0.334181	GEN1, SMC6
2	20101363	G	192	A	85	AF=0.333	0/0/1	3	1.12545e-10	0.372678	TTC32
2	20131079	T	31	C	76	AF=0.667	0/1/1	3	1.60286e-05	0.358232	WDR35
2	20251318	A	286	G	615	AF=0.667	0/1/1	3	2.11884e-28	0.339917	LAPTM4A
2	20491212	G	25	A	10	AF=0.333	0/0/1	3	0.0166738	0.596596	PUM2
2	20493248	T	9	C	21	AF=0.667	0/1/1	3	0.0427739	0.846986	PUM2
2	20533917	T	8	A	34	AF=0.667	0/1/1	3	6.87711e-05	0.0504888	PUM2
2	20885321	C	45	A	99	AF=0.667	0/1/1	3	7.95254e-06	0.658716	C2orf43
2	20887369	C	2	A	12	AF=0.667	0/1/1	3	0.0129395	0.163098	C2orf43
2	24156769	G	1	T	11	AF=0.667	0/1/1	3	0.00634766	0.0728458	UBXN2A
2	24163310	G	11	T	29	AF=0.667	0/1/1	3	0.00642658	0.504779	UBXN2A
2	24223086	G	140	A	329	AF=0.667	0/1/1	3	1.33241e-18	0.117042	UBXN2A
2	24225621	T	12	C	36	AF=0.667	0/1/1	3	0.00071727	0.283482	None
2	24225901	G	2	C	14	AF=0.667	0/1/1	3	0.00418091	0.109353	None
2	24262060	G	71	A	33	AF=0.333	0/0/1	3	0.000247116	0.835243	C2orf44
2	24317827	G	15	A	4	AF=0.333	0/0/1	3	0.0192108	0.334181	FAM228B
2	24463445	G	36	C	15	AF=0.333	0/0/1	3	0.00460131	0.656428	ITSN2
2	24930262	C	67	T	40	AF=0.333	0/0/1	3	0.0115982	0.411847	NCOA1
2	25959816	C	3	T	14	AF=0.667	0/1/1	3	0.0127258	0.20607	None
2	26096112	C	1	T	11	AF=0.667	0/1/1	3	0.00634766	0.0728458	ASXL2
2	26266496	G	13	A	4	AF=0.333	0/0/1	3	0.0490417	0.453466	RAB10
2	26359315	G	166	A	81	AF=0.333	0/0/1	3	6.78741e-08	0.892789	RAB10
2	26413817	C	372	T	693	AF=0.667	0/1/1	3	5.0271e-23	0.268991	HADHA
2	26413917	C	727	T	387	AF=0.333	0/0/1	3	1.35175e-24	0.309173	HADHA
2	26612465	G	75	A	48	AF=0.333	0/0/1	3	0.0186934	0.181286	EPT1
2	26613329	A	29	G	88	AF=0.667	0/1/1	3	4.27994e-08	0.0502728	EPT1
2	27001973	C	40	T	91	AF=0.667	0/1/1	3	9.79573e-06	0.578148	SLC35F6
2	27011669	G	2	A	12	AF=0.667	0/1/1	3	0.0129395	0.163098	CENPA
2	27018889	A	30	T	57	AF=0.667	0/1/1	3	0.0050136	0.820548	CENPA
2	27260469	G	186	A	113	AF=0.333	0/0/1	3	2.87388e-05	0.110441	TMEM214
2	27292651	T	20	C	47	AF=0.667	0/1/1	3	0.00130717	0.605661	AGBL5
2	27424636	G	458	A	210	AF=0.333	0/0/1	3	4.03941e-22	0.324557	SLC5A6
2	27542041	C	12	T	34	AF=0.667	0/1/1	3	0.00164149	0.349737	MPV17
2	27550967	A	96	G	206	AF=0.667	0/1/1	3	2.26877e-10	0.625313	GTF3C2
2	27589810	T	11	C	35	AF=0.667	0/1/1	3	0.000535585	0.211371	EIF2B4
2	27596395	C	8	A	20	AF=0.667	0/1/1	3	0.0356981	0.691405	SNX17
2	27667297	A	8	G	23	AF=0.667	0/1/1	3	0.0106738	0.449088	IFT172, KRTCAP3
2	27812252	G	16	A	5	AF=0.333	0/0/1	3	0.0266037	0.488508	ZNF512
2	27815278	A	46	G	21	AF=0.333	0/0/1	3	0.00306532	0.796405	ZNF512
2	27838058	C	325	A	136	AF=0.333	0/0/1	3	6.47021e-19	0.0839386	ZNF512
2	27873415	G	118	A	259	AF=0.667	0/1/1	3	2.96484e-13	0.444302	GPN1
2	27874563	G	10	T	25	AF=0.667	0/1/1	3	0.0166738	0.596596	SUPT7L
2	29112852	T	3	C	12	AF=0.667	0/1/1	3	0.0351562	0.412257	None
2	29162148	C	12	T	3	AF=0.333	0/0/1	3	0.0351562	0.412257	WDR43
2	29162754	A	18	G	6	AF=0.333	0/0/1	3	0.0226558	0.517006	WDR43
2	29167933	T	3	C	12	AF=0.667	0/1/1	3	0.0351562	0.412257	WDR43
2	30381901	T	108	C	72	AF=0.333	0/0/1	3	0.00890055	0.0580243	YPEL5
2	32249176	G	425	A	836	AF=0.667	0/1/1	3	2.27132e-31	0.765152	DPY30, MEMO1
2	32250440	A	1	G	9	AF=0.667	0/1/1	3	0.0214844	0.180663	DPY30, MEMO1
2	32257796	G	6	A	17	AF=0.667	0/1/1	3	0.0346897	0.516661	DPY30, MEMO1
2	32381883	G	25	A	47	AF=0.667	0/1/1	3	0.0127746	0.80322	SPAST
2	32391160	T	6	G	17	AF=0.667	0/1/1	3	0.0346897	0.516661	SLC30A6
2	32447718	C	54	T	34	AF=0.333	0/0/1	3	0.0422106	0.308928	SLC30A6
2	32535568	A	67	G	25	AF=0.333	0/0/1	3	1.38159e-05	0.225551	None
2	32581251	G	5	A	19	AF=0.667	0/1/1	3	0.00661075	0.27827	None
2	32583679	A	2	G	12	AF=0.667	0/1/1	3	0.0129395	0.163098	BIRC6
2	32689842	C	17	T	32	AF=0.667	0/1/1	3	0.0443842	0.879757	BIRC6
2	32702561	G	33	A	66	AF=0.667	0/1/1	3	0.00118523	1	BIRC6
2	32749723	C	2	T	10	AF=0.667	0/1/1	3	0.0385742	0.358815	BIRC6
2	32797177	C	5	T	22	AF=0.667	0/1/1	3	0.00151372	0.150899	BIRC6
2	32822957	G	163	A	73	AF=0.333	0/0/1	3	4.52627e-09	0.489824	BIRC6
2	33042102	C	1	T	10	AF=0.667	0/1/1	3	0.0117188	0.113886	TTC27
2	37323427	A	136	G	71	AF=0.333	0/0/1	3	7.35411e-06	0.768239	GPATCH11
2	37325780	A	63	G	104	AF=0.667	0/1/1	3	0.00187833	0.250191	None
2	37479862	C	15	T	37	AF=0.667	0/1/1	3	0.00318525	0.558182	PRKD3
2	37489877	G	2	A	10	AF=0.667	0/1/1	3	0.0385742	0.358815	PRKD3
2	37791321	T	3	C	12	AF=0.667	0/1/1	3	0.0351562	0.412257	None
2	38789508	T	31	A	68	AF=0.667	0/1/1	3	0.000255346	0.74935	None
2	38807177	C	5	G	19	AF=0.667	0/1/1	3	0.00661075	0.27827	HNRPLL
2	38827965	C	6	G	24	AF=0.667	0/1/1	3	0.00143091	0.173545	HNRPLL
2	38828538	G	7	A	23	AF=0.667	0/1/1	3	0.00522288	0.33276	HNRPLL
2	38828837	G	30	A	11	AF=0.333	0/0/1	3	0.004324	0.413045	HNRPLL
2	38977371	C	24	T	7	AF=0.333	0/0/1	3	0.00332689	0.254392	SRSF7
2	39082344	T	39	C	68	AF=0.667	0/1/1	3	0.00651776	0.475017	DHX57
2	39980322	T	1	C	11	AF=0.667	0/1/1	3	0.00634766	0.0728458	THUMPD2
2	39995885	C	8	T	20	AF=0.667	0/1/1	3	0.0356981	0.691405	THUMPD2
2	39995908	A	8	G	26	AF=0.667	0/1/1	3	0.00293506	0.2766	THUMPD2
2	42511903	A	20	G	7	AF=0.333	0/0/1	3	0.0191573	0.541228	EML4
2	42512638	T	28	C	8	AF=0.333	0/0/1	3	0.00119324	0.21486	EML4
2	42578149	A	1238	G	560	AF=0.333	0/0/1	3	9.03073e-59	0.0540116	COX7A2L
2	42585179	T	15	C	4	AF=0.333	0/0/1	3	0.0192108	0.334181	COX7A2L
2	43452334	G	91	A	40	AF=0.333	0/0/1	3	9.79573e-06	0.578148	ZFP36L2
2	43926943	T	9	A	30	AF=0.667	0/1/1	3	0.00106502	0.233642	PLEKHH2
2	43994899	C	29	A	9	AF=0.333	0/0/1	3	0.00165805	0.232455	PLEKHH2
2	44547131	A	88	G	198	AF=0.667	0/1/1	3	6.76587e-11	0.380308	PREPL, SLC3A1
2	44547574	G	93	A	222	AF=0.667	0/1/1	3	2.56141e-13	0.169086	PREPL, SLC3A1
2	44549204	A	10	G	24	AF=0.667	0/1/1	3	0.0243065	0.718251	PREPL
2	46604043	C	1	T	11	AF=0.667	0/1/1	3	0.00634766	0.0728458	EPAS1
2	46781580	C	24	G	7	AF=0.333	0/0/1	3	0.00332689	0.254392	RHOQ
2	46812338	A	6	G	25	AF=0.667	0/1/1	3	0.00087791	0.126647	PIGF
2	46839477	T	164	C	90	AF=0.333	0/0/1	3	3.99988e-06	0.464784	PIGF
2	46986716	C	16	G	46	AF=0.667	0/1/1	3	0.000176327	0.227869	SOCS5
2	46989262	A	3	T	15	AF=0.667	0/1/1	3	0.00753784	0.209209	SOCS5
2	47130814	G	219	A	110	AF=0.333	0/0/1	3	1.8744e-09	0.953412	MCFD2
2	47130850	A	71	G	139	AF=0.667	0/1/1	3	3.12734e-06	0.883697	MCFD2
2	47708440	A	40	T	10	AF=0.333	0/0/1	3	2.38613e-05	0.0506741	MSH2
2	47708513	A	24	G	10	AF=0.333	0/0/1	3	0.0243065	0.718251	MSH2
2	48010558	C	101	A	48	AF=0.333	0/0/1	3	1.6867e-05	0.862041	MSH6
2	48018081	A	126	G	52	AF=0.333	0/0/1	3	2.8462e-08	0.266039	MSH6
2	48023873	T	15	G	4	AF=0.333	0/0/1	3	0.0192108	0.334181	MSH6
2	48030458	G	15	C	3	AF=0.333	0/0/1	3	0.00753784	0.209209	MSH6
2	48033551	C	24	G	6	AF=0.333	0/0/1	3	0.00143091	0.173545	MSH6
2	48038944	A	22	G	5	AF=0.333	0/0/1	3	0.00151372	0.150899	FBXO11
2	48690596	T	4	G	16	AF=0.667	0/1/1	3	0.0118179	0.243595	PPP1R21
2	55756586	G	20	T	4	AF=0.333	0/0/1	3	0.00154388	0.126936	CCDC104
2	55845287	G	152	A	275	AF=0.667	0/1/1	3	2.77802e-09	0.32928	None
2	61245551	G	45	C	75	AF=0.667	0/1/1	3	0.00784659	0.333703	PEX13
2	61246145	G	12	A	29	AF=0.667	0/1/1	3	0.0115078	0.740576	PEX13
2	61415492	A	252	G	145	AF=0.333	0/0/1	3	8.7329e-08	0.18305	USP34
2	61417145	C	104	G	46	AF=0.333	0/0/1	3	2.47158e-06	0.544529	USP34
2	61444199	C	28	T	10	AF=0.333	0/0/1	3	0.00509764	0.395478	USP34
2	61493225	T	160	A	60	AF=0.333	0/0/1	3	1.0931e-11	0.0627243	USP34
2	61566536	T	82	C	31	AF=0.333	0/0/1	3	1.73e-06	0.195807	USP34
2	61747216	G	25	A	5	AF=0.333	0/0/1	3	0.000324914	0.0543561	XPO1
2	61748900	C	18	G	7	AF=0.333	0/0/1	3	0.0432853	0.674741	XPO1
2	61761637	G	29	A	9	AF=0.333	0/0/1	3	0.00165805	0.232455	XPO1
2	61761774	A	50	G	25	AF=0.333	0/0/1	3	0.00522824	1	XPO1
2	61764140	C	48	T	26	AF=0.333	0/0/1	3	0.01408	0.713429	XPO1
2	62228013	C	82	T	51	AF=0.333	0/0/1	3	0.00903049	0.23174	COMMD1
2	63809602	C	18	T	5	AF=0.333	0/0/1	3	0.010622	0.276561	WDPCP
2	63822785	T	14	C	3	AF=0.333	0/0/1	3	0.0127258	0.20607	MDH1
2	64320933	C	56	G	112	AF=0.667	0/1/1	3	1.86388e-05	1	PELI1
2	64327544	G	51	T	28	AF=0.333	0/0/1	3	0.0128124	0.720544	PELI1
2	64327592	T	126	C	47	AF=0.333	0/0/1	3	1.58132e-09	0.0905509	PELI1
2	65185862	C	3	T	13	AF=0.667	0/1/1	3	0.0212708	0.292529	None
2	65497262	A	665	G	297	AF=0.333	0/0/1	3	4.3572e-33	0.115572	ACTR2
2	65498340	A	130	G	74	AF=0.333	0/0/1	3	0.000107453	0.373171	ACTR2
2	65539641	C	66	T	102	AF=0.667	0/1/1	3	0.00675137	0.102045	SPRED2
2	68394409	C	1	T	12	AF=0.667	0/1/1	3	0.00341797	0.0731862	PNO1
2	68415767	G	288	A	124	AF=0.333	0/0/1	3	3.95658e-16	0.174345	PPP3R1
2	68468112	G	3	C	13	AF=0.667	0/1/1	3	0.0212708	0.292529	PPP3R1
2	69049941	T	60	C	96	AF=0.667	0/1/1	3	0.00491296	0.174692	ARHGAP25
2	69548495	T	20	G	4	AF=0.333	0/0/1	3	0.00154388	0.126936	GFPT1
2	69549262	T	81	C	32	AF=0.333	0/0/1	3	4.54704e-06	0.274117	GFPT1
2	69551011	T	61	C	25	AF=0.333	0/0/1	3	0.000130379	0.426107	GFPT1
2	69690187	A	19	G	7	AF=0.333	0/0/1	3	0.0289593	0.541009	AAK1
2	70438272	T	295	C	158	AF=0.333	0/0/1	3	1.20857e-10	0.485362	TIA1
2	70473773	T	3	C	14	AF=0.667	0/1/1	3	0.0127258	0.20607	TIA1
2	70485320	C	70	T	110	AF=0.667	0/1/1	3	0.0035332	0.114153	PCYOX1
2	70506745	C	15	T	44	AF=0.667	0/1/1	3	0.000203722	0.216407	PCYOX1
2	70510997	C	1	T	12	AF=0.667	0/1/1	3	0.00341797	0.0731862	SNRPG
2	70519291	G	9	A	23	AF=0.667	0/1/1	3	0.0200616	0.580369	SNRPG
2	70520498	A	17	G	50	AF=0.667	0/1/1	3	6.73797e-05	0.195249	SNRPG
2	70528601	T	45	C	85	AF=0.667	0/1/1	3	0.000571523	0.780249	FAM136A
2	71214755	G	313	A	160	AF=0.333	0/0/1	3	1.78664e-12	0.807424	TEX261
2	71215617	A	151	G	66	AF=0.333	0/0/1	3	7.67911e-09	0.388053	TEX261
2	71216640	G	30	A	9	AF=0.333	0/0/1	3	0.00106502	0.233642	TEX261
2	71338846	G	8	A	21	AF=0.667	0/1/1	3	0.0241195	0.562011	MCEE
2	71608195	C	29	T	12	AF=0.333	0/0/1	3	0.0115078	0.740576	ZNF638
2	71617906	T	4	C	13	AF=0.667	0/1/1	3	0.0490417	0.453466	ZNF638
2	71620563	A	21	G	38	AF=0.667	0/1/1	3	0.0363432	0.681478	ZNF638
2	71648425	G	5	T	20	AF=0.667	0/1/1	3	0.00407732	0.203802	ZNF638
2	71654450	A	96	G	221	AF=0.667	0/1/1	3	1.70479e-12	0.283373	ZNF638
2	73301602	G	19	T	37	AF=0.667	0/1/1	3	0.0222414	0.888369	RAB11FIP5
2	73442188	A	18	G	7	AF=0.333	0/0/1	3	0.0432853	0.674741	SMYD5
2	73446819	C	1	G	12	AF=0.667	0/1/1	3	0.00341797	0.0731862	SMYD5
2	73455747	C	19	T	38	AF=0.667	0/1/1	3	0.0163481	1	PRADC1
2	73456342	C	1	T	9	AF=0.667	0/1/1	3	0.0214844	0.180663	PRADC1
2	73476857	T	27	C	12	AF=0.333	0/0/1	3	0.0237027	0.865497	CCT7
2	73477527	C	3229	T	1637	AF=0.333	0/0/1	3	3.01721e-117	0.615751	CCT7
2	73677898	G	20	C	50	AF=0.667	0/1/1	3	0.000440285	0.448249	ALMS1
2	73679866	T	4	C	19	AF=0.667	0/1/1	3	0.00259948	0.123957	ALMS1
2	73679990	T	13	A	27	AF=0.667	0/1/1	3	0.0384773	1	ALMS1
2	74056564	A	4	G	14	AF=0.667	0/1/1	3	0.0308838	0.454315	STAMBP
2	74082417	C	9	T	27	AF=0.667	0/1/1	3	0.00393317	0.376869	STAMBP
2	74091327	T	1	C	10	AF=0.667	0/1/1	3	0.0117188	0.113886	STAMBP
2	74093720	A	57	G	19	AF=0.333	0/0/1	3	1.48369e-05	0.144088	STAMBP
2	74376812	T	85	C	55	AF=0.333	0/0/1	3	0.0139573	0.150999	BOLA3-AS1
2	74432449	A	37	G	12	AF=0.333	0/0/1	3	0.000469757	0.226035	MTHFD2
2	74440879	A	56	G	21	AF=0.333	0/0/1	3	8.21592e-05	0.279122	MTHFD2, SLC4A5
2	74444431	A	45	T	15	AF=0.333	0/0/1	3	0.000134514	0.217153	SLC4A5
2	74690039	G	79	A	124	AF=0.667	0/1/1	3	0.00194043	0.101072	MOGS
2	74690378	C	49	T	134	AF=0.667	0/1/1	3	2.53673e-10	0.0708791	MOGS
2	74699778	C	90	A	170	AF=0.667	0/1/1	3	7.94311e-07	0.64565	CCDC142, MRPL53
2	74721055	A	98	G	198	AF=0.667	0/1/1	3	6.30318e-09	1	TTC31
2	74725178	G	2	A	12	AF=0.667	0/1/1	3	0.0129395	0.163098	LBX2
2	74755778	A	57	C	96	AF=0.667	0/1/1	3	0.0020249	0.304016	AUP1
2	75060215	T	22	G	4	AF=0.333	0/0/1	3	0.000533521	0.0605731	HK2
2	75923413	T	29	C	84	AF=0.667	0/1/1	3	2.20077e-07	0.0900573	GCFC2
2	76489864	G	15	A	5	AF=0.333	0/0/1	3	0.0413895	0.48797	None
2	85595818	C	72	T	48	AF=0.333	0/0/1	3	0.0353237	0.121968	ELMOD3
2	86683642	A	30	G	53	AF=0.667	0/1/1	3	0.0152322	0.562984	KDM3A
2	86691250	G	65	A	97	AF=0.667	0/1/1	3	0.0146124	0.0670668	KDM3A
2	86715894	T	2	C	14	AF=0.667	0/1/1	3	0.00418091	0.109353	KDM3A
2	86756381	T	74	G	133	AF=0.667	0/1/1	3	4.97581e-05	0.461287	CHMP3, RNF103-CHMP3
2	86780582	G	11	A	30	AF=0.667	0/1/1	3	0.004324	0.413045	CHMP3, RNF103-CHMP3
2	87003197	C	70	G	41	AF=0.333	0/0/1	3	0.00758481	0.421443	RMND5A
2	95816563	T	4	A	13	AF=0.667	0/1/1	3	0.0490417	0.453466	ZNF514
2	95830652	T	11	C	30	AF=0.667	0/1/1	3	0.004324	0.413045	None
2	96858914	A	72	G	35	AF=0.333	0/0/1	3	0.000445302	1	STARD7
2	96919642	C	112	T	56	AF=0.333	0/0/1	3	1.86388e-05	1	TMEM127
2	96934504	T	446	C	204	AF=0.333	0/0/1	3	1.11577e-21	0.317943	CIAO1
2	96938048	A	130	C	73	AF=0.333	0/0/1	3	7.67247e-05	0.413831	CIAO1
2	96945712	C	27	T	6	AF=0.333	0/0/1	3	0.000324063	0.0670486	SNRNP200
2	96952833	A	848	G	443	AF=0.333	0/0/1	3	8.47364e-30	0.442715	SNRNP200
2	97030247	T	487	C	224	AF=0.333	0/0/1	3	2.74432e-23	0.320039	NCAPH
2	97392778	G	2	A	12	AF=0.667	0/1/1	3	0.0129395	0.163098	LMAN2L
2	97500775	A	41	G	77	AF=0.667	0/1/1	3	0.00117839	0.769662	CNNM3
2	97527739	A	10	C	23	AF=0.667	0/1/1	3	0.035082	0.853978	SEMA4C
2	99220707	T	149	C	61	AF=0.333	0/0/1	3	1.10998e-09	0.213183	COA5
2	99222834	G	87	C	38	AF=0.333	0/0/1	3	1.3863e-05	0.569162	COA5
2	99222916	C	99	T	59	AF=0.333	0/0/1	3	0.00182636	0.310985	COA5
2	99224309	A	106	T	60	AF=0.333	0/0/1	3	0.000443326	0.458737	COA5
2	99225168	C	227	T	119	AF=0.333	0/0/1	3	6.69393e-09	0.689739	UNC50
2	99233894	T	77	C	42	AF=0.333	0/0/1	3	0.00171053	0.628281	UNC50
2	99771681	G	23	C	10	AF=0.333	0/0/1	3	0.035082	0.853978	LIPT1, MRPL30
2	100898634	G	15	T	4	AF=0.333	0/0/1	3	0.0192108	0.334181	LONRF2
2	101009055	C	131	G	69	AF=0.333	0/0/1	3	1.38575e-05	0.708238	CHST10
2	101009326	T	74	C	43	AF=0.333	0/0/1	3	0.00531928	0.433547	CHST10
2	101009600	G	124	A	82	AF=0.333	0/0/1	3	0.00417013	0.0543267	CHST10
2	101031561	G	74	T	40	AF=0.333	0/0/1	3	0.00186672	0.69163	CHST10
2	101623667	C	17	T	33	AF=0.667	0/1/1	3	0.0328391	0.882056	RPL31
2	101623745	T	3	A	14	AF=0.667	0/1/1	3	0.0127258	0.20607	RPL31, TBC1D8
2	101872281	G	12	A	3	AF=0.333	0/0/1	3	0.0351562	0.412257	CNOT11
2	101904107	C	27	T	10	AF=0.333	0/0/1	3	0.00763208	0.488121	RNF149
2	101925026	T	20	C	40	AF=0.667	0/1/1	3	0.0134893	1	RNF149
2	102505704	C	3	T	15	AF=0.667	0/1/1	3	0.00753784	0.209209	MAP4K4
2	102981891	T	14	C	3	AF=0.333	0/0/1	3	0.0127258	0.20607	IL18R1
2	105882683	C	88	T	49	AF=0.333	0/0/1	3	0.00109102	0.527314	LOC644617
2	105897519	C	18	T	4	AF=0.333	0/0/1	3	0.00434351	0.174946	TGFBRAP1
2	105924510	A	24	G	11	AF=0.333	0/0/1	3	0.0409596	1	TGFBRAP1
2	109106381	A	147	G	58	AF=0.333	0/0/1	3	4.24266e-10	0.138388	GCC2
2	109222736	G	14	A	4	AF=0.333	0/0/1	3	0.0308838	0.454315	LIMS1
2	109301074	C	43	A	89	AF=0.667	0/1/1	3	7.69236e-05	0.926505	LIMS1
2	109302388	G	184	A	408	AF=0.667	0/1/1	3	1.72317e-20	0.257243	LIMS1
2	111400071	A	67	T	41	AF=0.333	0/0/1	3	0.0157493	0.308343	BUB1
2	112003163	G	7	A	31	AF=0.667	0/1/1	3	0.000116167	0.0579195	LOC541471
2	113497295	A	6	G	17	AF=0.667	0/1/1	3	0.0346897	0.516661	CKAP2L, NT5DC4
2	113498566	A	20	G	59	AF=0.667	0/1/1	3	1.29671e-05	0.152008	CKAP2L, NT5DC4
2	113514763	T	207	C	93	AF=0.333	0/0/1	3	4.0145e-11	0.42603	CKAP2L
2	113956371	G	84	C	57	AF=0.333	0/0/1	3	0.0281953	0.0744365	PSD4
2	113993385	C	12	G	28	AF=0.667	0/1/1	3	0.016589	0.739121	LOC654433, PAX8
2	113994417	G	22	T	6	AF=0.333	0/0/1	3	0.00371917	0.230206	LOC654433, PAX8
2	113996339	T	13	C	34	AF=0.667	0/1/1	3	0.00308768	0.444072	LOC654433, PAX8
2	114017029	A	10	G	23	AF=0.667	0/1/1	3	0.035082	0.853978	LOC654433, PAX8
2	114024846	C	4	T	19	AF=0.667	0/1/1	3	0.00259948	0.123957	PAX8
2	114461585	G	1	A	12	AF=0.667	0/1/1	3	0.00341797	0.0731862	None
2	114465942	G	48	A	19	AF=0.333	0/0/1	3	0.000521613	0.438292	None
2	114466193	G	20	T	62	AF=0.667	0/1/1	3	3.71464e-06	0.100536	None
2	114469135	C	17	G	49	AF=0.667	0/1/1	3	0.000101477	0.239489	None
2	114470302	A	57	G	21	AF=0.333	0/0/1	3	5.57112e-05	0.279481	None
2	114471061	T	8	C	28	AF=0.667	0/1/1	3	0.00119324	0.21486	None
2	114473310	G	7	A	22	AF=0.667	0/1/1	3	0.00813006	0.331762	SLC35F5
2	114492088	C	21	T	7	AF=0.333	0/0/1	3	0.012541	0.42593	SLC35F5
2	118575215	C	511	G	1060	AF=0.667	0/1/1	3	2.31596e-44	0.538136	DDX18
2	118583940	C	373	T	206	AF=0.333	0/0/1	3	3.74678e-12	0.251669	DDX18
2	118584779	C	17	T	59	AF=0.667	0/1/1	3	1.39687e-06	0.0507325	DDX18
2	118589911	A	15	G	40	AF=0.667	0/1/1	3	0.00101585	0.392403	DDX18
2	118596118	G	5	C	18	AF=0.667	0/1/1	3	0.010622	0.276561	None
2	118675848	T	26	G	9	AF=0.333	0/0/1	3	0.00598812	0.376264	CCDC93
2	120975350	G	24	A	76	AF=0.667	0/1/1	3	1.81e-07	0.0556105	TMEM185B
2	122488070	G	5	A	17	AF=0.667	0/1/1	3	0.0169005	0.369388	MKI67IP
2	126994848	G	3	A	12	AF=0.667	0/1/1	3	0.0351562	0.412257	None
2	127421215	T	3	G	13	AF=0.667	0/1/1	3	0.0212708	0.292529	GYPC
2	127426979	T	2	G	10	AF=0.667	0/1/1	3	0.0385742	0.358815	GYPC
2	128015367	C	1	T	11	AF=0.667	0/1/1	3	0.00634766	0.0728458	ERCC3
2	128079806	A	44	G	17	AF=0.333	0/0/1	3	0.000729905	0.416673	MAP3K2
2	128601490	T	62	C	20	AF=0.333	0/0/1	3	3.71464e-06	0.100536	None
2	128604232	A	37	T	21	AF=0.333	0/0/1	3	0.0479403	0.676436	POLR2D
2	128620372	T	5	C	24	AF=0.667	0/1/1	3	0.000546113	0.0763424	AMMECR1L
2	128622491	G	65	A	37	AF=0.333	0/0/1	3	0.00720621	0.529464	AMMECR1L
2	128912223	C	24	T	6	AF=0.333	0/0/1	3	0.00143091	0.173545	UGGT1
2	128939817	G	358	A	163	AF=0.333	0/0/1	3	7.87856e-18	0.352578	UGGT1
2	128947505	G	103	A	45	AF=0.333	0/0/1	3	2.09688e-06	0.486227	UGGT1
2	128947895	T	127	C	60	AF=0.333	0/0/1	3	1.079e-06	0.756785	UGGT1
2	130916415	A	42	G	18	AF=0.333	0/0/1	3	0.00267044	0.681655	SMPD4
2	130940090	G	30	T	15	AF=0.333	0/0/1	3	0.0356978	1	MZT2B, SMPD4
2	130941820	A	25	G	7	AF=0.333	0/0/1	3	0.0021024	0.193161	FLJ14346, MZT2B
2	131097247	G	35	A	72	AF=0.667	0/1/1	3	0.000445302	1	CCDC115
2	131097253	G	55	C	93	AF=0.667	0/1/1	3	0.00224437	0.337488	CCDC115
2	131100496	G	355	A	647	AF=0.667	0/1/1	3	2.06521e-20	0.159183	IMP4
2	131104049	C	309	T	132	AF=0.333	0/0/1	3	1.93776e-17	0.142836	IMP4
2	131104524	G	160	A	308	AF=0.667	0/1/1	3	7.29351e-12	0.694879	None
2	131131866	A	69	G	110	AF=0.667	0/1/1	3	0.00269103	0.153165	PTPN18
2	131131869	A	70	G	109	AF=0.667	0/1/1	3	0.00437537	0.112406	PTPN18
2	138759649	C	10	T	32	AF=0.667	0/1/1	3	0.000940674	0.251283	HNMT
2	145147758	C	18	T	4	AF=0.333	0/0/1	3	0.00434351	0.174946	ZEB2
2	145208367	C	1	T	11	AF=0.667	0/1/1	3	0.00634766	0.0728458	ZEB2
2	145247688	C	23	T	5	AF=0.333	0/0/1	3	0.000912234	0.107451	ZEB2
2	148601660	T	10	C	23	AF=0.667	0/1/1	3	0.035082	0.853978	None
2	148716428	T	145	C	265	AF=0.667	0/1/1	3	3.25233e-09	0.373478	ORC4
2	148778272	A	60	G	100	AF=0.667	0/1/1	3	0.00195373	0.275575	ORC4
2	158160554	A	13	G	3	AF=0.25	0/0/0/1	4	0.0212708	0.774801	GALNT5
2	168739913	G	34	C	10	AF=0.25	0/0/0/1	4	0.000388131	0.862241	None
2	170558231	T	7	C	21	AF=0.75	0/1/1/1	4	0.012541	1	PHOSPHO2-KLHL23
2	170670217	T	0	A	11	AF=0.75	0/1/1/1	4	0.000976562	0.0765626	METTL5
2	170806324	C	146	G	51	AF=0.25	0/0/0/1	4	8.31318e-12	0.805026	UBR3
2	176789427	A	13	C	35	AF=0.75	0/1/1/1	4	0.00208811	0.739599	None
3	37323579	C	96	A	27	AF=0.25	0/0/1	4	2.91236e-10	0.467838	GOLGA4
3	40350824	G	22	A	8	AF=0.25	0/0/1	4	0.0161248	0.833764	EIF1B-AS1
3	42255947	C	29	A	11	AF=0.25	0/0/1	4	0.00642658	0.715928	TRAK1
3	48085349	A	0	T	10	AF=0.75	0/0/1	4	0.00195312	0.0760412	MAP4
3	195401595	A	20	G	7	AF=0.333	0/0/1	3	0.0191573	0.541228	SDHAP2
3	195420641	A	64	T	21	AF=0.333	0/0/1	3	3.27647e-06	0.106817	None
3	195423604	C	93	T	40	AF=0.333	0/0/1	3	4.95086e-06	0.462657	None
3	195425279	G	50	A	19	AF=0.333	0/0/1	3	0.000244397	0.371435	None
3	195425653	C	3	A	19	AF=0.667	0/0/1	3	0.000855446	0.0677482	None
3	195426490	A	39	G	77	AF=0.667	0/0/1	3	0.000534095	0.92188	None
3	195806305	G	8	A	23	AF=0.667	0/0/1	3	0.0106738	0.449088	TFRC
4	42842	A	37	G	17	AF=0.333	0/0/1	3	0.00907334	0.885457	None
4	46238	G	21	A	4	AF=0.333	0/0/1	3	0.000910521	0.0877184	None
4	46967	G	79	A	33	AF=0.333	0/0/1	3	1.63569e-05	0.423548	None
4	57088	T	113	G	185	AF=0.667	0/0/1	3	3.60229e-05	0.096933	ZNF595, ZNF718
4	59656	G	40	T	10	AF=0.333	0/0/1	3	2.38613e-05	0.0506741	ZNF595, ZNF718
4	61493	C	503	T	218	AF=0.333	0/0/1	3	8.15906e-27	0.0821852	ZNF595, ZNF718
4	63535	C	344	T	155	AF=0.333	0/0/1	3	1.60113e-17	0.296454	ZNF595, ZNF718
4	68507	A	1074	T	551	AF=0.333	0/0/1	3	5.27033e-39	0.598751	ZNF595, ZNF718
4	480310	G	19	C	5	AF=0.333	0/0/1	3	0.00661075	0.27827	ZNF721
4	667076	C	45	G	13	AF=0.333	0/0/1	3	3.01159e-05	0.0938838	ATP5I
4	703607	G	1	A	9	AF=0.667	0/0/1	3	0.0214844	0.180663	PCGF3
4	749863	A	5	G	18	AF=0.667	0/0/1	3	0.010622	0.276561	PCGF3
4	756141	A	5	G	23	AF=0.667	0/0/1	3	0.000912234	0.107451	PCGF3
4	758221	T	2	C	11	AF=0.667	0/0/1	3	0.0224609	0.242342	PCGF3
4	760819	C	84	T	129	AF=0.667	0/0/1	3	0.00249029	0.058988	PCGF3
4	762963	A	59	G	85	AF=0.667	0/0/1	3	0.0368523	0.0521832	DKFZp547K2416, PCGF3
4	775515	G	39	T	73	AF=0.667	0/0/1	3	0.00169468	0.763762	LOC100129917
4	851640	G	15	A	5	AF=0.333	0/0/1	3	0.0413895	0.48797	GAK
4	860923	G	111	A	54	AF=0.333	0/0/1	3	1.07756e-05	0.934236	GAK
4	884058	G	12	A	3	AF=0.333	0/0/1	3	0.0351562	0.412257	GAK
4	903694	C	21	T	5	AF=0.333	0/0/1	3	0.00249392	0.148446	GAK
4	904695	T	18	C	6	AF=0.333	0/0/1	3	0.0226558	0.517006	GAK
4	942006	G	25	A	5	AF=0.333	0/0/1	3	0.000324914	0.0543561	TMEM175
4	961397	C	68	T	45	AF=0.333	0/0/1	3	0.0380186	0.161878	DGKQ
4	994692	C	26	T	10	AF=0.333	0/0/1	3	0.011331	0.596626	IDUA
4	1238246	G	6	A	17	AF=0.667	0/0/1	3	0.0346897	0.516661	CTBP1
4	1238256	A	23	T	6	AF=0.333	0/0/1	3	0.0023157	0.171514	CTBP1
4	1240962	C	8	G	32	AF=0.667	0/0/1	3	0.000182166	0.0923664	CTBP1
4	1244879	A	11	G	29	AF=0.667	0/0/1	3	0.00642658	0.504779	C4orf42, CTBP1-AS1
4	1245990	G	31	A	87	AF=0.667	0/0/1	3	2.48208e-07	0.117971	C4orf42, CTBP1-AS1
4	1294347	G	6	A	18	AF=0.667	0/0/1	3	0.0226558	0.517006	MAEA
4	1310115	T	4	C	14	AF=0.667	0/0/1	3	0.0308838	0.454315	MAEA
4	1330759	T	94	C	220	AF=0.667	0/0/1	3	8.60675e-13	0.231011	MAEA
4	1341291	A	8	G	34	AF=0.667	0/0/1	3	6.87711e-05	0.0504888	UVSSA
4	1343720	G	6	A	19	AF=0.667	0/0/1	3	0.0146333	0.399621	UVSSA
4	1374695	C	15	A	40	AF=0.667	0/0/1	3	0.00101585	0.392403	UVSSA
4	1377615	A	16	G	36	AF=0.667	0/0/1	3	0.00778744	0.769889	UVSSA
4	1378104	G	4	A	15	AF=0.667	0/0/1	3	0.0192108	0.334181	UVSSA
4	1380721	G	9	A	31	AF=0.667	0/0/1	3	0.000679548	0.179822	UVSSA
4	1381066	G	24	A	67	AF=0.667	0/0/1	3	7.34855e-06	0.182207	UVSSA
4	1387780	A	8	G	23	AF=0.667	0/0/1	3	0.0106738	0.449088	CRIPAK
4	1701317	G	647	A	1264	AF=0.667	0/0/1	3	7.13944e-46	0.610317	SLBP
4	1715250	C	8	T	25	AF=0.667	0/0/1	3	0.00455138	0.35591	None
4	1718883	A	102	T	187	AF=0.667	0/0/1	3	6.50449e-07	0.49244	TMEM129
4	1719758	A	24	G	9	AF=0.333	0/0/1	3	0.013531	0.580442	TMEM129
4	1721002	C	61	T	25	AF=0.333	0/0/1	3	0.000130379	0.426107	TMEM129
4	1721348	G	31	A	55	AF=0.667	0/0/1	3	0.0126725	0.569774	TMEM129
4	1721654	A	42	G	24	AF=0.333	0/0/1	3	0.0355827	0.602817	TMEM129
4	1721703	C	27	T	13	AF=0.333	0/0/1	3	0.0384773	1	TMEM129
4	1723292	C	268	T	130	AF=0.333	0/0/1	3	4.0171e-12	0.831579	TACC3
4	1731126	G	20	A	41	AF=0.667	0/0/1	3	0.00985345	1	TACC3
4	1731621	T	13	C	41	AF=0.667	0/0/1	3	0.000175127	0.193067	TACC3
4	1739976	C	30	T	7	AF=0.333	0/0/1	3	0.000191076	0.079769	TACC3
4	1741325	A	34	G	11	AF=0.333	0/0/1	3	0.000824082	0.267868	TACC3
4	1957848	G	380	A	162	AF=0.333	0/0/1	3	3.33156e-21	0.100767	WHSC1
4	2311361	C	28	T	9	AF=0.333	0/0/1	3	0.00256321	0.297053	ZFYVE28
4	2341965	C	18	T	6	AF=0.333	0/0/1	3	0.0226558	0.517006	ZFYVE28
4	2534609	C	6	T	17	AF=0.667	0/0/1	3	0.0346897	0.516661	None
4	2653847	A	23	C	9	AF=0.333	0/0/1	3	0.0200616	0.580369	FAM193A
4	2822467	G	51	T	24	AF=0.333	0/0/1	3	0.00244423	0.902661	SH3BP2
4	2826400	T	31	C	12	AF=0.333	0/0/1	3	0.00540157	0.519916	SH3BP2
4	2828992	C	27	T	50	AF=0.667	0/0/1	3	0.0116727	0.71874	SH3BP2
4	2901851	G	7	A	19	AF=0.667	0/0/1	3	0.0289593	0.541009	ADD1
4	2916762	C	174	G	333	AF=0.667	0/0/1	3	1.49758e-12	0.637577	ADD1
4	2939904	G	82	A	195	AF=0.667	0/0/1	3	8.8011e-12	0.202588	AB000466, NOP14, NOP14-AS1
4	3508591	C	3	T	13	AF=0.667	0/0/1	3	0.0212708	0.292529	LRPAP1
4	3512690	T	12	C	35	AF=0.667	0/0/1	3	0.00108854	0.282765	LRPAP1
4	3528120	C	2	G	10	AF=0.667	0/0/1	3	0.0385742	0.358815	LRPAP1
4	3528625	G	29	A	9	AF=0.333	0/0/1	3	0.00165805	0.232455	LRPAP1
4	3528662	T	9	C	27	AF=0.667	0/0/1	3	0.00393317	0.376869	LRPAP1
4	4249884	G	189	T	365	AF=0.667	0/0/1	3	6.4777e-14	0.685127	TMEM128
4	4553346	A	5	G	21	AF=0.667	0/0/1	3	0.00249392	0.148446	LOC100507266
4	4553570	C	5	T	20	AF=0.667	0/0/1	3	0.00407732	0.203802	LOC100507266
4	6675519	A	148	C	65	AF=0.333	0/0/1	3	1.2731e-08	0.424094	None
4	6675914	C	114	A	226	AF=0.667	0/0/1	3	1.24818e-09	0.954124	LOC93622
4	6676485	G	108	A	172	AF=0.667	0/0/1	3	0.000156822	0.0658566	LOC93622
4	6883012	C	62	T	30	AF=0.333	0/0/1	3	0.00111093	1	KIAA0232
4	6883326	A	191	G	112	AF=0.333	0/0/1	3	6.63484e-06	0.180146	KIAA0232
4	6988238	C	13	T	30	AF=0.667	0/0/1	3	0.0137182	0.747955	TBC1D14
4	6996217	A	13	G	3	AF=0.333	0/0/1	3	0.0212708	0.292529	TBC1D14
4	8437033	G	5	T	18	AF=0.667	0/0/1	3	0.010622	0.276561	ACOX3
4	8442002	T	4	C	13	AF=0.667	0/0/1	3	0.0490417	0.453466	ACOX3, TRMT44
4	8451460	C	15	A	35	AF=0.667	0/0/1	3	0.00660045	0.764288	TRMT44
4	9997534	C	2	T	14	AF=0.667	0/0/1	3	0.00418091	0.109353	SLC2A9
4	10076860	G	174	A	313	AF=0.667	0/0/1	3	3.06642e-10	0.268788	WDR1
4	10081117	C	12	A	28	AF=0.667	0/0/1	3	0.016589	0.739121	WDR1
4	10082772	T	16	C	42	AF=0.667	0/0/1	3	0.000861782	0.404901	WDR1
4	10102593	T	1	A	12	AF=0.667	0/0/1	3	0.00341797	0.0731862	WDR1
4	10117430	C	7	T	19	AF=0.667	0/0/1	3	0.0289593	0.541009	5S_rRNA, WDR1
4	10455656	T	28	C	58	AF=0.667	0/0/1	3	0.00160556	1	ZNF518B
4	13601337	G	27	A	79	AF=0.667	0/0/1	3	4.32778e-07	0.0988904	BOD1L1
4	15673098	A	15	G	4	AF=0.333	0/0/1	3	0.0192108	0.334181	None
4	15684712	G	20	A	8	AF=0.333	0/0/1	3	0.0356981	0.691405	FAM200B
4	17486468	A	17	T	4	AF=0.333	0/0/1	3	0.00719738	0.245886	QDPR
4	17488064	T	75	C	25	AF=0.333	0/0/1	3	5.63628e-07	0.0892107	QDPR
4	17488072	T	75	C	25	AF=0.333	0/0/1	3	5.63628e-07	0.0892107	QDPR
4	17488132	A	84	G	32	AF=0.333	0/0/1	3	1.48114e-06	0.201697	QDPR
4	17488244	G	93	A	38	AF=0.333	0/0/1	3	1.70051e-06	0.309682	QDPR
4	17488286	T	90	G	35	AF=0.333	0/0/1	3	9.23998e-07	0.218741	QDPR
4	17503382	C	121	T	47	AF=0.333	0/0/1	3	1.03809e-08	0.163819	QDPR
4	17802388	C	195	T	91	AF=0.333	0/0/1	3	7.37691e-10	0.61626	DCAF16
4	17805379	G	243	A	115	AF=0.333	0/0/1	3	1.16627e-11	0.654158	DCAF16
4	17809265	G	7	T	27	AF=0.667	0/0/1	3	0.000821395	0.145148	DCAF16
4	17810255	G	33	A	12	AF=0.333	0/0/1	3	0.0024589	0.42947	DCAF16
4	17812796	C	689	T	336	AF=0.333	0/0/1	3	1.16473e-28	0.740429	NCAPG
4	17842089	C	19	T	5	AF=0.333	0/0/1	3	0.00661075	0.27827	NCAPG
4	17842156	T	25	C	5	AF=0.333	0/0/1	3	0.000324914	0.0543561	NCAPG
4	17845238	G	115	C	72	AF=0.333	0/0/1	3	0.00204857	0.140375	LCORL, NCAPG
4	17875149	G	30	A	13	AF=0.333	0/0/1	3	0.0137182	0.747955	LCORL
4	20733049	G	13	C	4	AF=0.333	0/0/1	3	0.0490417	0.453466	KCNIP4, PACRGL
4	20749299	A	26	G	7	AF=0.333	0/0/1	3	0.00131873	0.194851	KCNIP4, PACRGL
4	23781566	A	21	G	4	AF=0.333	0/0/1	3	0.000910521	0.0877184	None
4	25122859	T	23	C	53	AF=0.667	0/0/1	3	0.000764582	0.627731	SEPSECS
4	25125703	C	65	G	99	AF=0.667	0/0/1	3	0.00975608	0.0971627	SEPSECS
4	25161715	G	3	C	13	AF=0.667	0/0/1	3	0.0212708	0.292529	SEPSECS
4	25238909	G	1	A	9	AF=0.667	0/0/1	3	0.0214844	0.180663	PI4K2B
4	25279456	T	69	A	36	AF=0.333	0/0/1	3	0.00165903	0.836323	PI4K2B
4	25758964	G	10	A	27	AF=0.667	0/0/1	3	0.00763208	0.488121	SEL1L3
4	25758995	T	10	C	26	AF=0.667	0/0/1	3	0.011331	0.596626	SEL1L3
4	26719569	T	9	C	35	AF=0.667	0/0/1	3	0.000106045	0.0787101	TBC1D19
4	26859610	C	47	T	87	AF=0.667	0/0/1	3	0.00069521	0.648025	None
4	26860413	G	27	A	45	AF=0.667	0/0/1	3	0.0443709	0.454706	None
4	37836302	T	283	C	146	AF=0.333	0/0/1	3	3.54585e-11	0.758656	PGM2
4	39116911	T	64	C	36	AF=0.333	0/0/1	3	0.00663712	0.596034	KLHL5
4	39122206	G	24	A	5	AF=0.333	0/0/1	3	0.000546113	0.0763424	KLHL5
4	39122697	C	113	T	65	AF=0.333	0/0/1	3	0.000396947	0.381789	KLHL5
4	39122913	T	56	A	20	AF=0.333	0/0/1	3	4.36893e-05	0.224121	KLHL5
4	39287322	C	3	T	17	AF=0.667	0/0/1	3	0.00257683	0.0981777	WDR19
4	39457430	T	71	C	38	AF=0.333	0/0/1	3	0.00203317	0.760636	RPL9
4	39458714	C	35	T	93	AF=0.667	0/0/1	3	2.98324e-07	0.160482	RPL9
4	39459154	G	46	A	15	AF=0.333	0/0/1	3	8.83756e-05	0.174483	RPL9
4	39709810	G	25	A	8	AF=0.333	0/0/1	3	0.00455138	0.35591	UBE2K
4	39783729	C	487	T	249	AF=0.333	0/0/1	3	1.21438e-18	0.754537	UBE2K
4	39824758	A	142	G	80	AF=0.333	0/0/1	3	3.80586e-05	0.39323	PDS5A
4	39855392	T	1	C	10	AF=0.667	0/0/1	3	0.0117188	0.113886	PDS5A
4	39864693	C	183	T	95	AF=0.333	0/0/1	3	1.43693e-07	0.750731	PDS5A
4	39921942	A	95	G	32	AF=0.333	0/0/1	3	1.93561e-08	0.059303	PDS5A
4	40198846	G	15	C	32	AF=0.667	0/0/1	3	0.0186238	1	RHOH
4	44701446	A	31	G	90	AF=0.667	0/0/1	3	7.48024e-08	0.0822091	GUF1
4	47887536	T	55	C	21	AF=0.333	0/0/1	3	0.000120629	0.331351	NFXL1
4	47887991	G	104	A	56	AF=0.333	0/0/1	3	0.000183096	0.675062	NFXL1
4	47901476	G	58	A	19	AF=0.333	0/0/1	3	9.77507e-06	0.116773	NFXL1
4	48343550	C	9	T	34	AF=0.667	0/0/1	3	0.000170155	0.104851	None
4	48343693	G	52	A	23	AF=0.333	0/0/1	3	0.00107952	0.713631	SLAIN2
4	48851937	C	27	T	7	AF=0.333	0/0/1	3	0.000821395	0.145148	OCIAD1
4	48857387	A	24	G	47	AF=0.667	0/0/1	3	0.00855454	0.90057	OCIAD1
4	52727094	T	22	C	6	AF=0.333	0/0/1	3	0.00371917	0.230206	DCUN1D4
4	52753118	G	35	A	9	AF=0.333	0/0/1	3	0.000106045	0.0787101	DCUN1D4
4	52780048	G	91	C	55	AF=0.333	0/0/1	3	0.00362478	0.291859	DCUN1D4
4	52781166	G	172	A	92	AF=0.333	0/0/1	3	9.67976e-07	0.60165	DCUN1D4
4	53463763	G	19	T	48	AF=0.667	0/0/1	3	0.000521613	0.438292	USP46
4	53529860	A	2	G	15	AF=0.667	0/0/1	3	0.00234985	0.0715024	None
4	53583981	A	3	T	18	AF=0.667	0/0/1	3	0.00148964	0.067485	None
4	56266882	A	57	C	37	AF=0.333	0/0/1	3	0.0494501	0.228784	TMEM165
4	56286613	A	34	T	16	AF=0.333	0/0/1	3	0.0153467	1	TMEM165
4	56291751	A	89	C	219	AF=0.667	0/0/1	3	8.44091e-14	0.102936	TMEM165
4	56834386	T	16	G	4	AF=0.333	0/0/1	3	0.0118179	0.243595	CEP135
4	57260298	C	187	G	88	AF=0.333	0/0/1	3	2.32426e-09	0.70113	PPAT
4	57268328	T	121	C	228	AF=0.667	0/0/1	3	1.07917e-08	0.609302	PPAT
4	57317347	G	62	T	151	AF=0.667	0/0/1	3	9.43374e-10	0.216444	PAICS
4	57327405	T	107	C	247	AF=0.667	0/0/1	3	7.06942e-14	0.236374	PAICS
4	57341891	A	2	G	11	AF=0.667	0/0/1	3	0.0224609	0.242342	SRP72
4	57342635	C	4	A	19	AF=0.667	0/0/1	3	0.00259948	0.123957	SRP72
4	57361553	A	1108	G	2369	AF=0.667	0/0/1	3	1.34565e-103	0.07486	SRP72
4	57362827	G	5	A	21	AF=0.667	0/0/1	3	0.00249392	0.148446	SRP72
4	68479934	C	5	T	24	AF=0.667	0/0/1	3	0.000546113	0.0763424	None
4	68483472	A	97	G	168	AF=0.667	0/0/1	3	1.52993e-05	0.267855	UBA6
4	68483491	T	114	G	210	AF=0.667	0/0/1	3	1.06414e-07	0.47958	UBA6
4	68486467	A	9	G	24	AF=0.667	0/0/1	3	0.013531	0.580442	UBA6
4	68500171	A	44	G	115	AF=0.667	0/0/1	3	1.65305e-08	0.152319	UBA6
4	68515054	A	1	G	11	AF=0.667	0/0/1	3	0.00634766	0.0728458	UBA6
4	68534392	C	110	T	239	AF=0.667	0/0/1	3	4.18556e-12	0.496067	UBA6
4	68586267	G	46	C	123	AF=0.667	0/0/1	3	2.68794e-09	0.102502	LOC550112
4	68586450	C	26	A	75	AF=0.667	0/0/1	3	1.1155e-06	0.113909	LOC550112
4	68587034	T	35	C	64	AF=0.667	0/0/1	3	0.00464065	0.670491	LOC550112
4	73956736	G	66	A	35	AF=0.333	0/0/1	3	0.00265379	0.752731	ANKRD17
4	75041945	C	4	T	13	AF=0.667	0/0/1	3	0.0490417	0.453466	MTHFD2L
4	76454850	G	51	T	32	AF=0.333	0/0/1	3	0.0475249	0.351334	THAP6
4	76469054	T	59	C	17	AF=0.333	0/0/1	3	1.39687e-06	0.0507325	THAP6
4	76471880	A	21	G	4	AF=0.333	0/0/1	3	0.000910521	0.0877184	THAP6
4	76870291	T	26	C	5	AF=0.333	0/0/1	3	0.000192195	0.0547235	None
4	77040175	A	20	T	8	AF=0.333	0/0/1	3	0.0356981	0.691405	NUP54
4	77053834	T	165	C	376	AF=0.667	0/0/1	3	5.84457e-20	0.171391	NUP54
4	77057905	G	3	T	13	AF=0.667	0/0/1	3	0.0212708	0.292529	NUP54
4	77072597	T	14	C	4	AF=0.333	0/0/1	3	0.0308838	0.454315	None
4	77082611	T	39	C	81	AF=0.667	0/0/1	3	0.000158034	0.922935	SCARB2
4	77134786	C	25	T	12	AF=0.333	0/0/1	3	0.047031	1	SCARB2
4	77874602	T	13	C	4	AF=0.333	0/0/1	3	0.0490417	0.453466	42989
4	79841975	G	13	A	3	AF=0.333	0/0/1	3	0.0212708	0.292529	PAQR3
4	80138620	T	4	C	16	AF=0.667	0/0/1	3	0.0118179	0.243595	LOC100505875
4	80146525	C	16	T	33	AF=0.667	0/0/1	3	0.0212941	1	LOC100505875
4	80146690	G	10	A	40	AF=0.667	0/0/1	3	2.38613e-05	0.0506741	LOC100505875
4	80147332	G	8	A	35	AF=0.667	0/0/1	3	4.19342e-05	0.0507615	LOC100505875
4	80149031	T	17	A	34	AF=0.667	0/0/1	3	0.0240929	1	LOC100505875
4	80898027	C	43	T	23	AF=0.333	0/0/1	3	0.0186573	0.794734	ANTXR2
4	80905990	C	181	G	75	AF=0.333	0/0/1	3	2.76938e-11	0.184986	ANTXR2
4	80989904	C	48	G	90	AF=0.667	0/0/1	3	0.000440585	0.718352	ANTXR2
4	80989905	A	46	G	90	AF=0.667	0/0/1	3	0.000201797	0.927553	ANTXR2
4	80993133	A	20	G	5	AF=0.333	0/0/1	3	0.00407732	0.203802	ANTXR2
4	80994033	G	118	C	72	AF=0.333	0/0/1	3	0.00104265	0.190663	ANTXR2
4	81007804	A	6	T	23	AF=0.667	0/0/1	3	0.0023157	0.171514	None
4	81008297	A	8	C	33	AF=0.667	0/0/1	3	0.000112221	0.06827	None
4	83350954	C	210	T	381	AF=0.667	0/0/1	3	1.90089e-12	0.256537	HNRPDL
4	83760887	A	4	G	14	AF=0.667	0/0/1	3	0.0308838	0.454315	SEC31A
4	83816232	A	25	T	65	AF=0.667	0/0/1	3	2.96645e-05	0.314164	AK128593, SEC31A, THAP9-AS1
4	83817816	T	51	C	97	AF=0.667	0/0/1	3	0.0001943	0.793706	AK128593, SEC31A, THAP9-AS1
4	83820170	G	6	A	28	AF=0.667	0/0/1	3	0.000195126	0.0671695	AK128593, SEC31A, THAP9-AS1
4	83838262	G	10	T	33	AF=0.667	0/0/1	3	0.000606107	0.195978	THAP9
4	83889449	G	1	A	10	AF=0.667	0/0/1	3	0.0117188	0.113886	LIN54
4	84191031	A	102	G	63	AF=0.333	0/0/1	3	0.00297703	0.186873	COQ2
4	84380955	G	12	T	27	AF=0.667	0/0/1	3	0.0237027	0.865497	MRPS18C
4	84382763	C	71	T	162	AF=0.667	0/0/1	3	2.3515e-09	0.404222	FAM175A, MRPS18C
4	84383810	C	40	T	93	AF=0.667	0/0/1	3	4.95086e-06	0.462657	FAM175A
4	84387434	C	7	T	22	AF=0.667	0/0/1	3	0.00813006	0.331762	FAM175A
4	84526275	T	87	C	29	AF=0.333	0/0/1	3	6.47153e-08	0.0612448	AGPAT9
4	84526767	C	111	T	66	AF=0.333	0/0/1	3	0.000890327	0.264767	AGPAT9
4	86506675	C	23	T	8	AF=0.333	0/0/1	3	0.0106738	0.449088	ARHGAP24
4	88052219	T	1	C	11	AF=0.667	0/0/1	3	0.00634766	0.0728458	AFF1
4	88058337	A	46	T	87	AF=0.667	0/0/1	3	0.000477223	0.782675	AFF1
4	88058340	C	95	G	45	AF=0.333	0/0/1	3	2.87757e-05	0.857724	AFF1
4	88060025	C	51	A	118	AF=0.667	0/0/1	3	2.70881e-07	0.415171	AFF1
4	88081534	A	19	T	6	AF=0.333	0/0/1	3	0.0146333	0.399621	None
4	88116798	C	39	T	111	AF=0.667	0/0/1	3	3.38464e-09	0.0684204	KLHL8
4	88141632	A	43	G	20	AF=0.333	0/0/1	3	0.0051524	0.893872	KLHL8
4	88360602	G	16	A	4	AF=0.333	0/0/1	3	0.0118179	0.243595	NUDT9
4	89197519	C	2	A	12	AF=0.667	0/0/1	3	0.0129395	0.163098	PPM1K
4	89629066	T	17	C	45	AF=0.667	0/0/1	3	0.000497092	0.349211	HERC3
4	89978281	G	34	A	55	AF=0.667	0/0/1	3	0.0334167	0.368138	FAM13A
4	94918936	G	29	A	10	AF=0.333	0/0/1	3	0.00337785	0.395952	None
4	94919000	A	29	G	10	AF=0.333	0/0/1	3	0.00337785	0.395952	None
4	99363400	G	101	A	57	AF=0.333	0/0/1	3	0.000580127	0.448928	RAP1GDS1
4	100784980	C	15	T	3	AF=0.333	0/0/1	3	0.00753784	0.209209	DAPP1
4	100799961	T	13	C	4	AF=0.333	0/0/1	3	0.0490417	0.453466	LAMTOR3
4	100870375	T	127	G	49	AF=0.333	0/0/1	3	3.617e-09	0.1292	H2AFZ
4	103183218	G	139	A	264	AF=0.667	0/0/1	3	4.78373e-10	0.634355	SLC39A8
4	103225513	T	34	C	85	AF=0.667	0/0/1	3	3.28376e-06	0.286533	SLC39A8
4	108641317	G	49	A	87	AF=0.667	0/0/1	3	0.00141864	0.524402	PAPSS1
4	109542003	T	64	C	27	AF=0.333	0/0/1	3	0.000132163	0.505814	RPL34
4	109547546	A	17	G	4	AF=0.333	0/0/1	3	0.00719738	0.245886	RPL34
4	110610192	C	69	T	143	AF=0.667	0/0/1	3	4.11846e-07	0.884163	CASP6
4	110628771	A	26	G	11	AF=0.333	0/0/1	3	0.0200739	0.729287	None
4	110628894	C	15	T	5	AF=0.333	0/0/1	3	0.0413895	0.48797	None
4	110631621	A	235	G	99	AF=0.333	0/0/1	3	6.78593e-14	0.163704	PLA2G12A
4	110647704	T	35	C	17	AF=0.333	0/0/1	3	0.0175332	1	PLA2G12A
4	113304342	A	3	G	15	AF=0.667	0/0/1	3	0.00753784	0.209209	ALPK1
4	113578609	C	45	T	81	AF=0.667	0/0/1	3	0.00170949	0.571346	LARP7
4	120215314	A	49	G	19	AF=0.333	0/0/1	3	0.000357955	0.371218	USP53
4	120215836	C	25	A	5	AF=0.333	0/0/1	3	0.000324914	0.0543561	USP53
4	123814206	C	112	A	42	AF=0.333	0/0/1	3	1.53615e-08	0.123773	FGF2, NUDT6
4	127339613	G	5	A	19	AF=0.667	0/0/1	3	0.00661075	0.27827	None
4	127557526	G	4	A	16	AF=0.667	0/0/1	3	0.0118179	0.243595	None
4	127574570	A	23	G	9	AF=0.333	0/0/1	3	0.0200616	0.580369	None
4	127686375	C	21	G	7	AF=0.333	0/0/1	3	0.012541	0.42593	None
4	127696014	T	55	G	18	AF=0.333	0/0/1	3	1.69136e-05	0.136025	None
4	127697164	T	54	G	16	AF=0.333	0/0/1	3	5.85396e-06	0.0751386	None
4	129808738	C	23	G	6	AF=0.333	0/0/1	3	0.0023157	0.171514	SCLT1
4	129867280	T	131	A	54	AF=0.333	0/0/1	3	1.43819e-08	0.243143	SCLT1
4	130031650	G	1	A	9	AF=0.667	0/0/1	3	0.0214844	0.180663	C4orf33
4	133267340	C	8	T	28	AF=0.667	0/0/1	3	0.00119324	0.21486	None
4	139104415	C	75	T	42	AF=0.333	0/0/1	3	0.00292813	0.556976	SLC7A11
4	139719704	A	12	T	26	AF=0.667	0/0/1	3	0.0335524	1	None
4	140222034	C	51	G	98	AF=0.667	0/0/1	3	0.000146284	0.79496	NDUFC1
4	140225110	C	2	T	10	AF=0.667	0/0/1	3	0.0385742	0.358815	NAA15
4	140243822	C	4	G	14	AF=0.667	0/0/1	3	0.0308838	0.454315	NAA15
4	140395583	C	6	T	17	AF=0.667	0/0/1	3	0.0346897	0.516661	RAB33B
4	141302314	C	190	T	89	AF=0.333	0/0/1	3	1.42843e-09	0.656789	SCOC
4	141458485	T	1	G	12	AF=0.667	0/0/1	3	0.00341797	0.0731862	ELMOD2
4	142238294	G	7	A	22	AF=0.667	0/0/1	3	0.00813006	0.331762	None
4	142240455	A	4	G	20	AF=0.667	0/0/1	3	0.00154388	0.126936	None
4	142240955	C	19	G	51	AF=0.667	0/0/1	3	0.000166042	0.311438	None
4	142241253	C	5	T	19	AF=0.667	0/0/1	3	0.00661075	0.27827	None
4	142244179	T	23	C	62	AF=0.667	0/0/1	3	2.77136e-05	0.250463	AK124399
4	144104764	C	3	T	17	AF=0.667	0/0/1	3	0.00257683	0.0981777	None
4	144740230	G	1	T	9	AF=0.667	0/0/1	3	0.0214844	0.180663	None
4	145031841	C	203	T	433	AF=0.667	0/0/1	3	4.22371e-20	0.474697	GYPA
4	145916518	T	145	A	74	AF=0.333	0/0/1	3	1.84105e-06	0.886089	ANAPC10
4	145916716	G	235	C	99	AF=0.333	0/0/1	3	6.78593e-14	0.163704	ANAPC10
4	146048554	T	23	C	9	AF=0.333	0/0/1	3	0.0200616	0.580369	ABCE1
4	146572227	G	17	A	4	AF=0.333	0/0/1	3	0.00719738	0.245886	MMAA
4	147099181	A	19	G	7	AF=0.333	0/0/1	3	0.0289593	0.541009	LSM6
4	147110891	A	141	G	72	AF=0.333	0/0/1	3	2.62079e-06	0.884511	LSM6
4	147176097	A	41	G	22	AF=0.333	0/0/1	3	0.022575	0.790057	SLC10A7
4	147446059	G	2	T	12	AF=0.667	0/0/1	3	0.0129395	0.163098	None
4	147447286	A	1	G	10	AF=0.667	0/0/1	3	0.0117188	0.113886	None
4	148558158	T	34	C	65	AF=0.667	0/0/1	3	0.00239463	0.831535	None
4	151199080	G	116	A	226	AF=0.667	0/0/1	3	2.77512e-09	0.818578	LRBA
4	155458728	C	6	T	24	AF=0.667	0/0/1	3	0.00143091	0.173545	PLRG1
4	155458844	C	6	T	25	AF=0.667	0/0/1	3	0.00087791	0.126647	PLRG1
4	155462148	A	10	T	35	AF=0.667	0/0/1	3	0.000247088	0.153429	PLRG1
4	159826379	T	12	C	39	AF=0.667	0/0/1	3	0.000198039	0.180331	C4orf45, FNIP2
4	159827313	T	24	C	62	AF=0.667	0/0/1	3	5.08365e-05	0.305693	C4orf45, FNIP2
4	164446283	T	28	A	55	AF=0.667	0/0/1	3	0.00403921	0.907893	42795
4	164447271	T	15	C	36	AF=0.667	0/0/1	3	0.00460131	0.656428	42795
4	164464101	G	1	T	11	AF=0.667	0/0/1	3	0.00634766	0.0728458	42795
4	170314951	T	18	C	47	AF=0.667	0/0/1	3	0.00042213	0.360489	NEK1
4	170492958	T	29	C	11	AF=0.333	0/0/1	3	0.00642658	0.504779	NEK1
4	170492973	A	33	G	10	AF=0.333	0/0/1	3	0.000606107	0.195978	NEK1
4	170634408	A	292	G	139	AF=0.333	0/0/1	3	1.36576e-13	0.682716	CLCN3
4	175158412	T	27	C	61	AF=0.667	0/0/1	3	0.000374022	0.652116	FBXO8
4	175454600	T	4	C	15	AF=0.667	0/0/1	3	0.0192108	0.334181	None
4	177241155	A	236	C	535	AF=0.667	0/0/1	3	1.56097e-27	0.117225	SPCS3
4	177243229	A	22	G	7	AF=0.333	0/0/1	3	0.00813006	0.331762	SPCS3
4	178274565	A	52	G	19	AF=0.333	0/0/1	3	0.000112269	0.259756	NEIL3
4	178274694	T	58	G	37	AF=0.333	0/0/1	3	0.0396082	0.276065	NEIL3
4	178274835	A	54	C	31	AF=0.333	0/0/1	3	0.0165088	0.565349	NEIL3
4	178283757	T	30	C	78	AF=0.667	0/0/1	3	4.31475e-06	0.261314	NEIL3
4	183811513	C	392	T	179	AF=0.333	0/0/1	3	2.75934e-19	0.329071	DCTD
4	183812351	C	280	T	533	AF=0.667	0/0/1	3	5.08386e-19	0.503027	DCTD
4	183838103	C	29	T	12	AF=0.333	0/0/1	3	0.0115078	0.740576	DCTD
4	184600601	A	75	G	134	AF=0.667	0/0/1	3	5.41875e-05	0.420573	TRAPPC11
4	185776649	T	11	C	38	AF=0.667	0/0/1	3	0.000141971	0.129201	BC016366
4	185776650	G	12	A	38	AF=0.667	0/0/1	3	0.000305864	0.179261	BC016366
4	187118662	G	3	T	12	AF=0.667	0/0/1	3	0.0351562	0.412257	CYP4V2
4	187122319	T	24	G	65	AF=0.667	0/0/1	3	1.61138e-05	0.217891	CYP4V2
4	187416939	C	3	T	14	AF=0.667	0/0/1	3	0.0127258	0.20607	LOC285441
4	187524859	T	19	C	47	AF=0.667	0/0/1	3	0.000756107	0.514216	FAT1
5	667444	T	18	G	4	AF=0.25	0/0/1	4	0.00434351	0.624116	TPPP
5	864142	C	75	T	35	AF=0.25	0/0/1	4	0.000172384	0.0995693	BRD9
5	12562803	C	37	A	6	AF=0.25	0/0/1	4	1.63612e-06	0.112534	None
5	27287831	T	0	G	11	AF=0.75	0/0/1	4	0.000976562	0.0765626	None
5	31538692	A	171	C	74	AF=0.25	0/0/1	4	5.15867e-10	0.064966	C5orf22
5	40854522	G	48	A	13	AF=0.25	0/0/1	4	7.66517e-06	0.557718	CARD6
5	52392274	G	25	A	7	AF=0.333	0/0/1	3	0.0021024	0.193161	None
5	53392855	T	2	C	10	AF=0.667	0/0/1	3	0.0385742	0.358815	ARL15
5	53606295	T	110	C	228	AF=0.667	0/0/1	3	1.28621e-10	0.817483	ARL15
5	53620949	G	38	A	10	AF=0.333	0/0/1	3	6.16964e-05	0.0677954	None
5	53622417	T	24	C	10	AF=0.333	0/0/1	3	0.0243065	0.718251	None
5	53701258	G	10	A	32	AF=0.667	0/0/1	3	0.000940674	0.251283	None
5	53704319	T	149	C	79	AF=0.333	0/0/1	3	4.14461e-06	0.67359	None
5	53705132	G	50	T	24	AF=0.333	0/0/1	3	0.00337223	1	None
5	53705145	A	36	T	16	AF=0.333	0/0/1	3	0.00778744	0.769889	None
5	53706241	T	118	C	61	AF=0.333	0/0/1	3	2.45362e-05	0.812456	None
5	53706512	G	103	T	61	AF=0.333	0/0/1	3	0.00129558	0.320019	None
5	53706803	A	181	G	78	AF=0.333	0/0/1	3	1.33869e-10	0.291963	None
5	53707175	T	159	C	80	AF=0.333	0/0/1	3	3.57733e-07	0.945388	None
5	53734045	G	15	C	4	AF=0.333	0/0/1	3	0.0192108	0.334181	None
5	53735182	A	27	G	11	AF=0.333	0/0/1	3	0.013853	0.730926	None
5	54033056	T	3	C	15	AF=0.667	0/0/1	3	0.00753784	0.209209	None
5	54033656	A	7	G	22	AF=0.667	0/0/1	3	0.00813006	0.331762	None
5	54033719	T	9	C	30	AF=0.667	0/0/1	3	0.00106502	0.233642	None
5	54461584	C	1	T	10	AF=0.667	0/0/1	3	0.0117188	0.113886	CDC20B, GPX8
5	54603822	T	62	C	104	AF=0.667	0/0/1	3	0.00138805	0.284427	SKIV2L2
5	54645411	G	223	A	451	AF=0.667	0/0/1	3	1.05785e-18	0.934876	SKIV2L2
5	58272116	G	3	A	13	AF=0.667	0/0/1	3	0.0212708	0.292529	PDE4D
5	61609443	A	8	G	35	AF=0.667	0/0/1	3	4.19342e-05	0.0507615	KIF2A
5	61685944	A	58	G	21	AF=0.333	0/0/1	3	3.76151e-05	0.23317	DIMT1
5	61686647	C	98	T	50	AF=0.333	0/0/1	3	9.82676e-05	0.93054	DIMT1
5	61694379	T	415	C	224	AF=0.333	0/0/1	3	3.66122e-14	0.355856	DIMT1
5	61772535	G	69	T	173	AF=0.667	0/0/1	3	1.74618e-11	0.117147	IPO11
5	61923328	T	44	C	77	AF=0.667	0/0/1	3	0.00345094	0.499775	IPO11, IPO11-LRRC70
5	64097145	C	186	G	350	AF=0.667	0/0/1	3	1.28836e-12	0.492065	CWC27
5	65018126	C	31	G	63	AF=0.667	0/0/1	3	0.00126139	1	NLN
5	65478009	A	28	T	7	AF=0.333	0/0/1	3	0.00050826	0.107691	SREK1
5	68463014	G	588	T	259	AF=0.333	0/0/1	3	3.3952e-30	0.0936685	CCNB1
5	68467507	T	28	C	10	AF=0.333	0/0/1	3	0.00509764	0.395478	CCNB1
5	68469793	G	24	T	11	AF=0.333	0/0/1	3	0.0409596	1	CCNB1
5	68469815	C	24	G	11	AF=0.333	0/0/1	3	0.0409596	1	CCNB1
5	68469923	G	53	T	15	AF=0.333	0/0/1	3	4.11597e-06	0.053372	CCNB1
5	68470527	G	51	A	19	AF=0.333	0/0/1	3	0.000166042	0.311438	CCNB1
5	68505854	A	1244	C	674	AF=0.333	0/0/1	3	3.74539e-39	0.0899122	CENPH
5	68709909	C	309	G	156	AF=0.333	0/0/1	3	1.13679e-12	0.921635	RAD17
5	71495041	T	113	C	69	AF=0.333	0/0/1	3	0.00136945	0.20805	MAP1B
5	71654855	G	46	C	28	AF=0.333	0/0/1	3	0.047393	0.459274	PTCD2
5	71657414	G	29	A	8	AF=0.333	0/0/1	3	0.000752897	0.162881	None
5	72184098	C	202	T	96	AF=0.333	0/0/1	3	7.91387e-10	0.712719	TNPO1
5	72339109	T	1	C	12	AF=0.667	0/0/1	3	0.00341797	0.0731862	FCHO2
5	72348272	A	19	G	52	AF=0.667	0/0/1	3	0.000112269	0.259756	FCHO2
5	72861366	G	52	A	25	AF=0.333	0/0/1	3	0.00279905	1	ANKRA2
5	72876035	G	249	A	116	AF=0.333	0/0/1	3	2.81528e-12	0.57872	UTP15
5	74897410	A	20	G	5	AF=0.333	0/0/1	3	0.00407732	0.203802	None
5	75008193	T	15	C	4	AF=0.333	0/0/1	3	0.0192108	0.334181	POC5
5	75996909	G	40	A	92	AF=0.667	0/0/1	3	6.97467e-06	0.518294	IQGAP2
5	76003254	A	106	T	49	AF=0.333	0/0/1	3	5.44447e-06	0.733268	IQGAP2
5	76326885	G	32	A	9	AF=0.333	0/0/1	3	0.000430857	0.137726	AGGF1
5	76356725	T	16	C	4	AF=0.333	0/0/1	3	0.0118179	0.243595	AGGF1
5	76359024	C	82	A	41	AF=0.333	0/0/1	3	0.000275618	1	AGGF1
5	76359344	C	22	T	56	AF=0.667	0/0/1	3	0.000149482	0.400614	AGGF1
5	77374926	C	1	T	11	AF=0.667	0/0/1	3	0.00634766	0.0728458	AP3B1
5	77412011	A	181	G	371	AF=0.667	0/0/1	3	4.46533e-16	0.821471	AP3B1
5	77473165	A	56	G	141	AF=0.667	0/0/1	3	1.20719e-09	0.151608	AP3B1
5	77656078	A	63	G	126	AF=0.667	0/0/1	3	5.36783e-06	1	BC039455
5	78573790	A	32	T	8	AF=0.333	0/0/1	3	0.000182166	0.0923664	JMY
5	78596044	T	20	C	5	AF=0.333	0/0/1	3	0.00407732	0.203802	JMY
5	78621668	G	70	T	27	AF=0.333	0/0/1	3	1.4767e-05	0.2821	JMY
5	78920250	T	12	G	3	AF=0.333	0/0/1	3	0.0351562	0.412257	PAPD4
5	78927418	G	15	A	4	AF=0.333	0/0/1	3	0.0192108	0.334181	PAPD4
5	78927809	C	42	G	11	AF=0.333	0/0/1	3	2.24756e-05	0.0578947	PAPD4
5	78940783	C	17	T	4	AF=0.333	0/0/1	3	0.00719738	0.245886	PAPD4
5	79438705	A	8	C	34	AF=0.667	0/0/1	3	6.87711e-05	0.0504888	SERINC5
5	79489514	A	1	G	11	AF=0.667	0/0/1	3	0.00634766	0.0728458	SERINC5
5	79937474	G	15	A	5	AF=0.333	0/0/1	3	0.0413895	0.48797	DHFR
5	79938007	A	26	G	12	AF=0.333	0/0/1	3	0.0335524	1	DHFR
5	79950508	C	12	T	29	AF=0.667	0/0/1	3	0.0115078	0.740576	DHFR, MSH3
5	80600006	G	6	A	22	AF=0.667	0/0/1	3	0.00371917	0.230206	RNU5E-1, ZCCHC9
5	80601880	C	17	G	38	AF=0.667	0/0/1	3	0.0064558	0.776019	RNU5E-1, ZCCHC9
5	81550043	G	66	A	35	AF=0.333	0/0/1	3	0.00265379	0.752731	ATG10
5	81569293	A	5	C	23	AF=0.667	0/0/1	3	0.000912234	0.107451	RPS23
5	81569311	A	10	G	23	AF=0.667	0/0/1	3	0.035082	0.853978	RPS23
5	81573992	C	119	T	60	AF=0.333	0/0/1	3	1.22847e-05	0.936964	RPS23
5	81574182	C	325	T	638	AF=0.667	0/0/1	3	3.50172e-24	0.784474	RPS23
5	81574925	G	41	A	15	AF=0.333	0/0/1	3	0.000685564	0.324814	None
5	81576965	C	21	A	5	AF=0.333	0/0/1	3	0.00249392	0.148446	ATP6AP1L
5	82347956	A	4	G	17	AF=0.667	0/0/1	3	0.00719738	0.245886	None
5	82350642	C	256	T	119	AF=0.333	0/0/1	3	1.22731e-12	0.546932	TMEM167A
5	82350810	C	77	A	175	AF=0.667	0/0/1	3	6.08924e-10	0.385084	TMEM167A
5	84813532	G	1	A	9	AF=0.667	0/0/1	3	0.0214844	0.180663	None
5	84815495	C	3	T	14	AF=0.667	0/0/1	3	0.0127258	0.20607	None
5	85650734	C	7	T	23	AF=0.667	0/0/1	3	0.00522288	0.33276	None
5	85699436	A	1	G	10	AF=0.667	0/0/1	3	0.0117188	0.113886	None
5	86633973	G	1	A	9	AF=0.667	0/0/1	3	0.0214844	0.180663	RASA1
5	86656090	C	2	T	14	AF=0.667	0/0/1	3	0.00418091	0.109353	RASA1
5	87569037	A	37	G	15	AF=0.333	0/0/1	3	0.00318525	0.558182	TMEM161B-AS1
5	89770768	G	327	A	637	AF=0.667	0/0/1	3	1.01815e-23	0.681872	POLR3G
5	89808979	T	104	C	38	AF=0.333	0/0/1	3	2.78338e-08	0.108876	POLR3G
5	89812676	T	23	A	7	AF=0.333	0/0/1	3	0.00522288	0.33276	LYSMD3
5	89950787	G	15	A	34	AF=0.667	0/0/1	3	0.00939924	0.763226	GPR98
5	89985882	A	56	G	97	AF=0.667	0/0/1	3	0.00115046	0.391701	GPR98
5	89988412	G	1	A	12	AF=0.667	0/0/1	3	0.00341797	0.0731862	GPR98
5	90151589	G	26	A	76	AF=0.667	0/0/1	3	7.43905e-07	0.114471	GPR98
5	90337465	A	2	G	11	AF=0.667	0/0/1	3	0.0224609	0.242342	GPR98
5	94994467	T	27	C	10	AF=0.333	0/0/1	3	0.00763208	0.488121	SPATA9
5	95091194	C	124	T	303	AF=0.667	0/0/1	3	2.21935e-18	0.0645061	RHOBTB3
5	95091201	A	96	G	236	AF=0.667	0/0/1	3	9.50213e-15	0.0915451	RHOBTB3
5	95111810	T	33	C	14	AF=0.333	0/0/1	3	0.00794273	0.757121	RHOBTB3
5	95124858	A	43	G	21	AF=0.333	0/0/1	3	0.0081469	1	RHOBTB3
5	95127236	T	20	G	4	AF=0.333	0/0/1	3	0.00154388	0.126936	RHOBTB3
5	95131292	G	367	A	163	AF=0.333	0/0/1	3	4.25041e-19	0.23079	RHOBTB3
5	95234350	A	18	G	37	AF=0.667	0/0/1	3	0.0144538	1	ELL2
5	96109935	T	76	G	129	AF=0.667	0/0/1	3	0.00026197	0.266347	CAST, ERAP1
5	96118852	G	41	C	103	AF=0.667	0/0/1	3	2.44806e-07	0.250313	ERAP1
5	96120170	G	1	A	12	AF=0.667	0/0/1	3	0.00341797	0.0731862	ERAP1
5	96121069	C	1	T	12	AF=0.667	0/0/1	3	0.00341797	0.0731862	ERAP1
5	96129512	A	53	G	81	AF=0.667	0/0/1	3	0.0193368	0.14212	ERAP1
5	96139250	C	48	G	84	AF=0.667	0/0/1	3	0.00219353	0.460819	ERAP1
5	98199204	C	236	T	109	AF=0.333	0/0/1	3	6.82909e-12	0.529996	CHD1
5	102537357	T	56	C	135	AF=0.667	0/0/1	3	1.03516e-08	0.250682	PPIP5K2
5	102537379	A	46	G	109	AF=0.667	0/0/1	3	4.47164e-07	0.394057	PPIP5K2
5	102596816	G	3	T	13	AF=0.667	0/0/1	3	0.0212708	0.292529	C5orf30
5	102884700	G	62	C	24	AF=0.333	0/0/1	3	5.08365e-05	0.305693	NUDT12
5	102886246	G	92	C	49	AF=0.333	0/0/1	3	0.000368176	0.721226	NUDT12
5	102894447	A	26	G	10	AF=0.333	0/0/1	3	0.011331	0.596626	NUDT12
5	108380419	T	39	C	10	AF=0.333	0/0/1	3	3.84591e-05	0.0678254	FER
5	108527540	T	1	C	9	AF=0.667	0/0/1	3	0.0214844	0.180663	None
5	108529612	C	10	A	34	AF=0.667	0/0/1	3	0.000388131	0.152063	AK021888
5	108529988	A	6	G	21	AF=0.667	0/0/1	3	0.00592461	0.307037	AK021888
5	108531552	C	14	T	41	AF=0.667	0/0/1	3	0.000355281	0.253325	None
5	109181682	A	22	T	42	AF=0.667	0/0/1	3	0.0168582	0.894642	MAN2A1
5	110432008	G	4	C	17	AF=0.667	0/0/1	3	0.00719738	0.245886	WDR36
5	110439509	A	187	G	82	AF=0.333	0/0/1	3	1.34042e-10	0.365098	WDR36
5	110456263	C	103	G	247	AF=0.667	0/0/1	3	8.82979e-15	0.126128	WDR36
5	110456704	A	302	T	123	AF=0.333	0/0/1	3	1.82769e-18	0.0569836	WDR36
5	111499270	A	117	T	64	AF=0.333	0/0/1	3	9.99533e-05	0.581045	EPB41L4A
5	112162854	T	31	C	14	AF=0.333	0/0/1	3	0.0160944	0.87466	APC
5	112164561	G	41	A	23	AF=0.333	0/0/1	3	0.0327658	0.691114	APC
5	112176559	T	24	G	8	AF=0.333	0/0/1	3	0.00700037	0.355135	APC
5	112176756	T	40	A	23	AF=0.333	0/0/1	3	0.0429565	0.594386	APC
5	112196949	A	17	C	5	AF=0.333	0/0/1	3	0.0169005	0.369388	SRP19
5	112203564	T	79	A	31	AF=0.333	0/0/1	3	5.34489e-06	0.267682	SRP19
5	112205298	A	17	C	5	AF=0.333	0/0/1	3	0.0169005	0.369388	SRP19
5	112212608	G	71	A	23	AF=0.333	0/0/1	3	7.25437e-07	0.0794913	REEP5, SRP19
5	112213071	G	29	T	8	AF=0.333	0/0/1	3	0.000752897	0.162881	REEP5, SRP19
5	112214093	C	32	T	15	AF=0.333	0/0/1	3	0.0186238	1	REEP5, SRP19
5	112227799	A	6	G	18	AF=0.667	0/0/1	3	0.0226558	0.517006	REEP5, SRP19, ZRSR1
5	112257908	T	157	C	373	AF=0.667	0/0/1	3	2.69839e-21	0.072459	REEP5
5	112350098	C	73	T	24	AF=0.333	0/0/1	3	6.40473e-07	0.0843528	DCP2
5	112350707	G	37	A	78	AF=0.667	0/0/1	3	0.000165524	0.843618	DCP2
5	112354898	C	101	G	224	AF=0.667	0/0/1	3	7.41936e-12	0.410502	DCP2
5	114951080	T	184	G	90	AF=0.333	0/0/1	3	1.40421e-08	0.898167	TMED7, TMED7-TICAM2
5	114951140	T	123	G	59	AF=0.333	0/0/1	3	2.40037e-06	0.875055	TMED7, TMED7-TICAM2
5	114951553	A	167	G	97	AF=0.333	0/0/1	3	1.95408e-05	0.240134	TMED7, TMED7-TICAM2
5	115166713	C	73	T	30	AF=0.333	0/0/1	3	2.71764e-05	0.404016	ATG12
5	115420415	A	5	C	20	AF=0.667	0/0/1	3	0.00407732	0.203802	None
5	115420547	T	13	C	30	AF=0.667	0/0/1	3	0.0137182	0.747955	None
5	115428334	G	61	T	154	AF=0.667	0/0/1	3	1.83597e-10	0.129143	COMMD10
5	118172345	G	7	T	31	AF=0.667	0/0/1	3	0.000116167	0.0579195	None
5	118173652	A	23	G	42	AF=0.667	0/0/1	3	0.024812	0.695491	DTWD2
5	118484804	G	31	A	61	AF=0.667	0/0/1	3	0.0023146	0.912434	DMXL1
5	118729286	C	124	T	269	AF=0.667	0/0/1	3	2.01625e-13	0.486788	TNFAIP8
5	118729388	A	116	G	205	AF=0.667	0/0/1	3	7.73253e-07	0.286672	TNFAIP8
5	121365578	T	19	C	5	AF=0.333	0/0/1	3	0.00661075	0.27827	None
5	121366518	G	66	T	39	AF=0.333	0/0/1	3	0.0108179	0.408548	None
5	121366608	A	96	G	55	AF=0.333	0/0/1	3	0.00106473	0.437254	None
5	121367128	C	63	G	32	AF=0.333	0/0/1	3	0.00192435	0.913804	None
5	121376162	A	15	G	5	AF=0.333	0/0/1	3	0.0413895	0.48797	None
5	126168150	G	19	C	5	AF=0.333	0/0/1	3	0.00661075	0.27827	LMNB1
5	126171999	T	364	C	168	AF=0.333	0/0/1	3	1.20446e-17	0.408127	LMNB1
5	126172195	C	970	T	439	AF=0.333	0/0/1	3	2.37599e-46	0.0899188	LMNB1
5	126873577	G	1	C	10	AF=0.667	0/0/1	3	0.0117188	0.113886	PRRC1
5	126888369	A	17	G	32	AF=0.667	0/0/1	3	0.0443842	0.879757	PRRC1
5	126888773	A	3	G	18	AF=0.667	0/0/1	3	0.00148964	0.067485	PRRC1
5	126889181	T	20	C	46	AF=0.667	0/0/1	3	0.00185823	0.695682	PRRC1
5	126889370	C	27	T	65	AF=0.667	0/0/1	3	9.26404e-05	0.441488	PRRC1
5	126889640	A	99	G	180	AF=0.667	0/0/1	3	1.42245e-06	0.4462	AJ515158, PRRC1
5	126890046	T	54	C	92	AF=0.667	0/0/1	3	0.00209006	0.379839	AJ515158, PRRC1
5	126890472	C	154	T	310	AF=0.667	0/0/1	3	3.75483e-13	1	AJ515158, PRRC1
5	128301824	T	29	A	11	AF=0.333	0/0/1	3	0.00642658	0.504779	SLC27A6
5	128430757	T	113	C	259	AF=0.667	0/0/1	3	2.59726e-14	0.24807	ISOC1
5	132160057	C	71	T	182	AF=0.667	0/0/1	3	2.05985e-12	0.0827753	SHROOM1
5	132161294	G	30	A	88	AF=0.667	0/0/1	3	8.55354e-08	0.078375	SHROOM1
5	132163265	G	30	A	14	AF=0.333	0/0/1	3	0.0226288	1	SHROOM1
5	132203952	G	16	A	37	AF=0.667	0/0/1	3	0.00548634	0.770857	UQCRQ
5	132232315	G	42	A	82	AF=0.667	0/0/1	3	0.000415855	0.924144	AFF4
5	132334252	A	205	G	114	AF=0.333	0/0/1	3	3.93442e-07	0.372917	ZCCHC10
5	132388068	T	2	G	15	AF=0.667	0/0/1	3	0.00234985	0.0715024	HSPA4
5	132437531	C	456	T	876	AF=0.667	0/0/1	3	5.32752e-31	0.467521	HSPA4
5	133318669	A	5	G	23	AF=0.667	0/0/1	3	0.000912234	0.107451	VDAC1
5	133321163	G	5	A	15	AF=0.667	0/0/1	3	0.0413895	0.48797	VDAC1
5	133324858	A	19	C	36	AF=0.667	0/0/1	3	0.0300289	0.886432	VDAC1
5	133915969	T	20	G	5	AF=0.333	0/0/1	3	0.00407732	0.203802	PHF15
5	133967875	A	11	G	29	AF=0.667	0/0/1	3	0.00642658	0.504779	SAR1B
5	134252619	C	13	G	4	AF=0.333	0/0/1	3	0.0490417	0.453466	PCBD2
5	135515956	T	64	C	21	AF=0.333	0/0/1	3	3.27647e-06	0.106817	SMAD5
5	135516188	T	46	G	107	AF=0.667	0/0/1	3	8.93148e-07	0.440349	SMAD5
5	135516707	A	44	G	123	AF=0.667	0/0/1	3	7.65012e-10	0.0590061	SMAD5
5	135516836	T	38	C	65	AF=0.667	0/0/1	3	0.0100633	0.464546	SMAD5
5	135517150	T	143	C	246	AF=0.667	0/0/1	3	1.98366e-07	0.146802	SMAD5
5	135517227	G	52	A	110	AF=0.667	0/0/1	3	6.0585e-06	0.80271	SMAD5
5	135517740	T	24	G	68	AF=0.667	0/0/1	3	4.93535e-06	0.151555	SMAD5
5	135518242	G	38	T	69	AF=0.667	0/0/1	3	0.00352927	0.609855	SMAD5
5	135837160	C	15	A	4	AF=0.333	0/0/1	3	0.0192108	0.334181	None
5	135842066	A	15	G	4	AF=0.333	0/0/1	3	0.0192108	0.334181	None
5	135843119	C	21	A	5	AF=0.333	0/0/1	3	0.00249392	0.148446	None
5	135851045	A	16	C	5	AF=0.333	0/0/1	3	0.0266037	0.488508	None
5	135855910	A	128	G	62	AF=0.333	0/0/1	3	1.92164e-06	0.877911	None
5	136091006	C	20	A	5	AF=0.333	0/0/1	3	0.00407732	0.203802	None
5	136954861	A	4	G	17	AF=0.667	0/0/1	3	0.00719738	0.245886	KLHL3
5	137217270	T	1	C	10	AF=0.667	0/0/1	3	0.0117188	0.113886	MYOT
5	137493897	T	1	C	11	AF=0.667	0/0/1	3	0.00634766	0.0728458	BRD8
5	137502183	T	1	A	12	AF=0.667	0/0/1	3	0.00341797	0.0731862	BRD8
5	137514853	A	31	G	68	AF=0.667	0/0/1	3	0.000255346	0.74935	KIF20A
5	137648417	C	2	T	15	AF=0.667	0/0/1	3	0.00234985	0.0715024	CDC25C
5	137735578	G	201	T	122	AF=0.333	0/0/1	3	1.29801e-05	0.0981453	KDM3B
5	137772334	A	120	G	245	AF=0.667	0/0/1	3	5.59797e-11	0.911584	KDM3B
5	138463538	G	60	C	89	AF=0.667	0/0/1	3	0.0214834	0.0817468	SIL1
5	138704040	A	19	C	7	AF=0.333	0/0/1	3	0.0289593	0.541009	PAIP2, SLC23A1
5	139936980	A	17	G	41	AF=0.667	0/0/1	3	0.00223255	0.579144	SRA1
5	140027216	T	152	C	60	AF=0.333	0/0/1	3	2.1491e-10	0.126458	NDUFA2
5	140027304	T	52	C	23	AF=0.333	0/0/1	3	0.00107952	0.713631	NDUFA2
5	140040665	G	58	A	25	AF=0.333	0/0/1	3	0.000378343	0.641451	IK
5	140041960	T	111	G	55	AF=0.333	0/0/1	3	1.65269e-05	1	IK
5	140046435	A	53	G	19	AF=0.333	0/0/1	3	7.55581e-05	0.260216	WDR55
5	140050265	A	173	G	82	AF=0.333	0/0/1	3	1.23079e-08	0.739912	WDR55
5	140077653	G	176	C	73	AF=0.333	0/0/1	3	5.45102e-11	0.201361	HARS2
5	140081902	G	25	A	8	AF=0.333	0/0/1	3	0.00455138	0.35591	ZMAT2
5	140086062	A	288	T	122	AF=0.333	0/0/1	3	1.40881e-16	0.142209	ZMAT2
5	141041779	G	65	A	33	AF=0.333	0/0/1	3	0.00160058	0.915113	ARAP3
5	141058148	C	59	G	21	AF=0.333	0/0/1	3	2.52911e-05	0.193708	ARAP3
5	141310649	T	34	C	88	AF=0.667	0/0/1	3	1.08237e-06	0.213162	KIAA0141
5	141703671	G	5	A	15	AF=0.667	0/0/1	3	0.0413895	0.48797	SPRY4
5	141704370	A	1	C	11	AF=0.667	0/0/1	3	0.00634766	0.0728458	SPRY4
5	142658156	C	98	A	58	AF=0.333	0/0/1	3	0.00170437	0.308695	NR3C1
5	144754441	T	2	C	13	AF=0.667	0/0/1	3	0.00738525	0.167521	None
5	144754535	C	1	A	11	AF=0.667	0/0/1	3	0.00634766	0.0728458	None
5	145499996	C	1098	T	558	AF=0.333	0/0/1	3	9.53525e-41	0.734703	LARS
5	145508636	T	635	C	284	AF=0.333	0/0/1	3	1.40467e-31	0.132292	LARS
5	145520137	A	47	G	20	AF=0.333	0/0/1	3	0.00130717	0.605661	LARS
5	145520141	C	52	T	19	AF=0.333	0/0/1	3	0.000112269	0.259756	LARS
5	145520186	G	44	T	24	AF=0.333	0/0/1	3	0.0205269	0.701839	LARS
5	145528454	C	40	T	11	AF=0.333	0/0/1	3	5.70381e-05	0.100887	LARS
5	145860193	G	58	A	155	AF=0.667	0/0/1	3	2.1493e-11	0.0688377	TCERG1
5	145860443	G	2	A	14	AF=0.667	0/0/1	3	0.00418091	0.109353	TCERG1
5	145874426	T	19	C	4	AF=0.333	0/0/1	3	0.00259948	0.123957	TCERG1
5	145890455	C	457	T	944	AF=0.667	0/0/1	3	2.54072e-39	0.609926	TCERG1
5	148726162	G	2	A	11	AF=0.667	0/0/1	3	0.0224609	0.242342	GRPEL2
5	149113096	G	14	T	34	AF=0.667	0/0/1	3	0.0055152	0.646588	PPARGC1B
5	149200043	T	10	C	28	AF=0.667	0/0/1	3	0.00509764	0.395478	PPARGC1B
5	149212800	G	17	A	37	AF=0.667	0/0/1	3	0.00907334	0.885457	PPARGC1B
5	149215213	C	2	G	14	AF=0.667	0/0/1	3	0.00418091	0.109353	PPARGC1B
5	149228648	C	36	T	58	AF=0.667	0/0/1	3	0.0297664	0.324881	PPARGC1B
5	149366714	T	14	C	32	AF=0.667	0/0/1	3	0.0113516	0.755948	SLC26A2
5	149390148	G	16	A	55	AF=0.667	0/0/1	3	3.75324e-06	0.0587875	HMGXB3
5	149408929	G	9	A	32	AF=0.667	0/0/1	3	0.000430857	0.137726	HMGXB3
5	149413441	G	7	T	21	AF=0.667	0/0/1	3	0.012541	0.42593	HMGXB3
5	150848701	A	24	G	11	AF=0.333	0/0/1	3	0.0409596	1	SLC36A1
5	150851258	A	32	G	14	AF=0.333	0/0/1	3	0.0113516	0.755948	SLC36A1
5	150868745	C	61	T	36	AF=0.333	0/0/1	3	0.0143896	0.451065	SLC36A1
5	151043103	G	77	C	44	AF=0.333	0/0/1	3	0.00345094	0.499775	SPARC
5	153372525	G	116	A	61	AF=0.333	0/0/1	3	4.32299e-05	0.750028	FAM114A2
5	153432733	T	108	C	46	AF=0.333	0/0/1	3	6.3279e-07	0.393345	MFAP3
5	153434018	T	58	C	24	AF=0.333	0/0/1	3	0.000221964	0.483415	MFAP3
5	154182236	T	34	C	15	AF=0.333	0/0/1	3	0.00939924	0.763226	LARP1
5	154199059	A	120	G	54	AF=0.333	0/0/1	3	6.17804e-07	0.573679	FAXDC2
5	154203121	C	39	T	75	AF=0.667	0/0/1	3	0.000959197	0.842796	FAXDC2
5	154346325	G	727	A	409	AF=0.333	0/0/1	3	2.87043e-21	0.0548332	MRPL22
5	157166598	C	125	T	77	AF=0.333	0/0/1	3	0.000897814	0.156025	THG1L
5	158708065	A	8	G	25	AF=0.667	0/0/1	3	0.00455138	0.35591	UBLCP1
5	162940999	A	105	G	192	AF=0.667	0/0/1	3	5.04081e-07	0.460294	MAT2B
5	167980525	A	106	G	48	AF=0.333	0/0/1	3	3.38756e-06	0.608748	None
5	167985613	C	19	T	4	AF=0.333	0/0/1	3	0.00259948	0.123957	PANK3
5	169127097	C	83	A	33	AF=0.333	0/0/1	3	3.86543e-06	0.280399	DOCK2
5	169267784	G	57	A	24	AF=0.333	0/0/1	3	0.000317317	0.555988	DOCK2
5	169435713	A	48	C	117	AF=0.667	0/0/1	3	7.83414e-08	0.282937	DOCK2
5	169454941	C	17	G	54	AF=0.667	0/0/1	3	1.25268e-05	0.102242	DOCK2
5	169483512	T	1	G	12	AF=0.667	0/0/1	3	0.00341797	0.0731862	DOCK2
5	169510190	T	27	C	9	AF=0.333	0/0/1	3	0.00393317	0.376869	DOCK2
5	169724767	G	7	C	27	AF=0.667	0/0/1	3	0.000821395	0.145148	LCP2
5	172196711	G	14	T	31	AF=0.667	0/0/1	3	0.0160944	0.87466	DUSP1
5	172354229	T	21	C	8	AF=0.333	0/0/1	3	0.0241195	0.562011	ERGIC1
5	172749695	T	11	C	37	AF=0.667	0/0/1	3	0.000222245	0.167119	STC2
5	173038038	T	21	C	57	AF=0.667	0/0/1	3	5.57112e-05	0.279481	BOD1
5	173038116	C	20	G	38	AF=0.667	0/0/1	3	0.024746	0.889378	BOD1
5	173038159	T	26	G	47	AF=0.667	0/0/1	3	0.0186178	0.709812	BOD1
5	173316729	G	84	A	49	AF=0.333	0/0/1	3	0.00304933	0.407833	CPEB4
5	173385583	C	56	G	20	AF=0.333	0/0/1	3	4.36893e-05	0.224121	CPEB4
5	175600330	G	19	A	37	AF=0.667	0/0/1	3	0.0222414	0.888369	LOC643201
5	175612177	G	24	A	46	AF=0.667	0/0/1	3	0.0115264	0.89922	LOC643201
5	175785884	G	4	A	18	AF=0.667	0/0/1	3	0.00434351	0.174946	KIAA1191
5	176378574	G	218	T	100	AF=0.333	0/0/1	3	3.19863e-11	0.513024	UIMC1
5	176481392	A	22	T	7	AF=0.333	0/0/1	3	0.00813006	0.331762	ZNF346
5	176734855	G	25	C	76	AF=0.667	0/0/1	3	3.72314e-07	0.0728116	MXD3
5	176760227	A	6	C	25	AF=0.667	0/0/1	3	0.00087791	0.126647	LMAN2
5	176761535	A	5	G	17	AF=0.667	0/0/1	3	0.0169005	0.369388	LMAN2
5	176857512	C	27	T	12	AF=0.333	0/0/1	3	0.0237027	0.865497	GRK6
5	176867943	A	284	G	167	AF=0.333	0/0/1	3	3.97295e-08	0.0991274	GRK6, PRR7-AS1
5	176885499	T	363	C	176	AF=0.333	0/0/1	3	5.80083e-16	0.783984	DBN1
5	176890067	A	13	G	4	AF=0.333	0/0/1	3	0.0490417	0.453466	DBN1
5	176898619	T	28	C	7	AF=0.333	0/0/1	3	0.00050826	0.107691	DBN1
5	176980904	G	82	A	42	AF=0.333	0/0/1	3	0.000415855	0.924144	FAM193B
5	177659075	T	18	C	47	AF=0.667	0/0/1	3	0.00042213	0.360489	AGXT2L2
5	178192807	T	2	C	10	AF=0.667	0/0/1	3	0.0385742	0.358815	AACSP1
5	178246465	T	16	C	45	AF=0.667	0/0/1	3	0.000264279	0.278158	None
5	178246711	G	14	A	34	AF=0.667	0/0/1	3	0.0055152	0.646588	None
5	178247211	T	8	C	35	AF=0.667	0/0/1	3	4.19342e-05	0.0507615	None
5	178247386	T	11	A	30	AF=0.667	0/0/1	3	0.004324	0.413045	None
5	178258160	T	30	C	7	AF=0.333	0/0/1	3	0.000191076	0.079769	None
5	178258166	A	30	G	7	AF=0.333	0/0/1	3	0.000191076	0.079769	None
5	178313078	A	16	C	51	AF=0.667	0/0/1	3	2.16892e-05	0.119498	None
5	179036433	G	134	A	77	AF=0.333	0/0/1	3	0.000105812	0.342394	RUFY1
5	179042971	A	25	G	52	AF=0.667	0/0/1	3	0.00279905	1	HNRNPH1
5	179043041	C	36	G	94	AF=0.667	0/0/1	3	3.7338e-07	0.192918	HNRNPH1
5	179045142	G	32	A	76	AF=0.667	0/0/1	3	2.76079e-05	0.475117	HNRNPH1
5	179048449	T	571	G	269	AF=0.333	0/0/1	3	8.5444e-26	0.442267	HNRNPH1
5	179983378	T	1	C	11	AF=0.667	0/0/1	3	0.00634766	0.0728458	CNOT6
5	179991841	A	5	G	18	AF=0.667	0/0/1	3	0.010622	0.276561	CNOT6
5	179991959	C	19	T	40	AF=0.667	0/0/1	3	0.0086415	1	CNOT6
5	180486247	G	42	T	75	AF=0.667	0/0/1	3	0.00292813	0.556976	BTNL9
5	180685900	T	37	G	16	AF=0.333	0/0/1	3	0.00548634	0.770857	TRIM52
6	349343	T	24	A	63	AF=0.75	0/0/0/1	4	3.47997e-05	0.620267	DUSP22
6	350829	G	66	A	13	AF=0.25	0/0/0/1	4	1.07814e-09	0.0906824	DUSP22
6	2365878	G	0	A	11	AF=0.75	0/0/0/1	4	0.000976562	0.0765626	LOC100508120
6	2783071	G	64	A	25	AF=0.25	0/0/0/1	4	4.32152e-05	0.540262	WRNIP1
6	2833739	A	37	G	109	AF=0.75	0/0/0/1	4	1.98037e-09	0.923939	SERPINB1
6	2834265	C	0	T	11	AF=0.75	0/0/0/1	4	0.000976562	0.0765626	SERPINB1
6	2835831	A	3	G	19	AF=0.75	0/0/0/1	4	0.000855446	0.32392	SERPINB1
6	2836266	T	2	A	10	AF=0.75	0/0/0/1	4	0.0385742	0.741896	SERPINB1
6	2840316	A	6	C	25	AF=0.75	0/0/0/1	4	0.00087791	0.540735	SERPINB1
6	2887652	A	22	G	7	AF=0.25	0/0/0/1	4	0.00813006	1	AY927512, SERPINB9
6	2887771	G	32	A	11	AF=0.25	0/0/0/1	4	0.00191396	1	AY927512, SERPINB9
6	2887860	C	64	T	14	AF=0.25	0/0/0/1	4	8.58218e-09	0.19009	AY927512, SERPINB9
6	2888213	G	98	A	24	AF=0.25	0/0/0/1	4	8.3414e-12	0.2091	AY927512, SERPINB9
6	2952155	G	5	A	29	AF=0.75	0/0/0/1	4	3.85582e-05	0.233095	SERPINB6
6	2953445	A	2	G	23	AF=0.75	0/0/0/1	4	1.94311e-05	0.0617784	SERPINB6
6	2960992	G	7	A	30	AF=0.75	0/0/0/1	4	0.000191076	0.453392	SERPINB6
6	2961042	T	7	G	21	AF=0.75	0/0/0/1	4	0.012541	1	SERPINB6
6	2966681	C	13	T	54	AF=0.75	0/0/0/1	4	4.46583e-07	0.325914	SERPINB6
6	2968440	A	18	T	47	AF=0.75	0/0/0/1	4	0.00042213	0.667228	SERPINB6
6	2990985	T	22	C	65	AF=0.75	0/0/0/1	4	4.3487e-06	1	DKFZP686I15217, NQO2
6	2991195	C	20	T	43	AF=0.75	0/0/0/1	4	0.0051524	0.243492	DKFZP686I15217, NQO2
6	2991225	T	21	C	42	AF=0.75	0/0/0/1	4	0.0111414	0.144675	DKFZP686I15217, NQO2
6	3016107	C	25	T	5	AF=0.25	0/0/0/1	4	0.000324914	0.399191	NQO2
6	3016732	G	0	A	11	AF=0.75	0/0/0/1	4	0.000976562	0.0765626	NQO2
6	3017495	G	111	A	27	AF=0.25	0/0/0/1	4	2.71345e-13	0.16817	NQO2
6	3018704	A	15	G	74	AF=0.75	0/0/0/1	4	1.53421e-10	0.0860582	NQO2
6	3018811	T	90	A	31	AF=0.25	0/0/0/1	4	7.48024e-08	0.916379	NQO2
6	3018982	T	17	G	77	AF=0.75	0/0/0/1	4	2.70464e-10	0.151991	NQO2
6	3023467	C	60	G	29	AF=0.25	0/0/0/1	4	0.00133526	0.110885	HTATSF1P2
6	3064451	G	13	C	3	AF=0.25	0/0/0/1	4	0.0212708	0.774801	RIPK1
6	3066477	G	31	A	16	AF=0.25	0/0/0/1	4	0.0399861	0.176394	RIPK1
6	3264884	G	28	A	61	AF=0.75	0/0/0/1	4	0.000610259	0.177429	AK096219, PSMG4
6	3264898	C	59	T	21	AF=0.25	0/0/0/1	4	2.52911e-05	0.796596	AK096219, PSMG4
6	3409112	G	0	A	11	AF=0.75	0/0/0/1	4	0.000976562	0.0765626	SLC22A23
6	4012650	T	23	C	10	AF=0.25	0/0/0/1	4	0.035082	0.545782	None
6	4016348	T	59	C	12	AF=0.25	0/0/0/1	4	1.34777e-08	0.131707	None
6	4017145	A	25	G	6	AF=0.25	0/0/0/1	4	0.00087791	0.540735	None
6	4017147	C	6	T	25	AF=0.75	0/0/0/1	4	0.00087791	0.540735	None
6	4017163	C	27	T	6	AF=0.25	0/0/0/1	4	0.000324063	0.427686	None
6	4021163	T	34	G	18	AF=0.25	0/0/0/1	4	0.0364834	0.111233	None
6	4118414	G	15	A	4	AF=0.25	0/0/0/1	4	0.0192108	1	C6orf201, ECI2
6	4836889	A	14	G	3	AF=0.25	0/0/0/1	4	0.0127258	0.587712	CDYL
6	4853165	C	1	T	11	AF=0.75	0/0/0/1	4	0.00634766	0.316025	CDYL
6	4950275	C	2	T	17	AF=0.75	0/0/0/1	4	0.000728607	0.188802	CDYL
6	4953879	C	25	A	10	AF=0.25	0/0/0/1	4	0.0166738	0.695958	CDYL
6	4954412	C	141	T	52	AF=0.25	0/0/0/1	4	1.11561e-10	0.560567	CDYL
6	5066039	A	0	T	10	AF=0.75	0/0/0/1	4	0.00195312	0.0760412	AK094934
6	5108965	A	59	G	14	AF=0.25	0/0/0/1	4	1.01364e-07	0.28154	AK094934, LYRM4
6	5109119	T	157	C	40	AF=0.25	0/0/0/1	4	1.38933e-17	0.138685	AK094934, LYRM4
6	6562789	G	12	A	26	AF=0.75	0/0/0/1	4	0.0335524	0.350932	LY86-AS1
6	6605761	C	18	G	41	AF=0.75	0/0/0/1	4	0.00379371	0.366272	LY86, LY86-AS1
6	7198973	A	1	C	13	AF=0.75	0/0/0/1	4	0.00183105	0.212637	RREB1
6	7202319	C	80	G	271	AF=0.75	0/0/0/1	4	2.06801e-25	0.355742	RREB1
6	7224710	C	0	T	11	AF=0.75	0/0/0/1	4	0.000976562	0.0765626	RREB1
6	7232158	C	18	T	4	AF=0.25	0/0/0/1	4	0.00434351	0.624116	RREB1
6	7232186	T	4	C	16	AF=0.75	0/0/0/1	4	0.0118179	0.797669	RREB1
6	7234172	G	3	A	12	AF=0.75	0/0/0/1	4	0.0351562	1	RREB1
6	7251037	C	45	T	117	AF=0.75	0/0/0/1	4	1.4166e-08	0.414654	RREB1
6	7285175	C	25	T	9	AF=0.25	0/0/0/1	4	0.00904119	0.843636	SSR1
6	7393452	C	495	T	162	AF=0.25	0/0/0/1	4	4.18859e-40	0.857133	RIOK1
6	7409693	A	23	G	6	AF=0.25	0/0/0/1	4	0.0023157	0.674301	RIOK1
6	7409702	G	22	C	6	AF=0.25	0/0/0/1	4	0.00371917	0.828117	RIOK1
6	8082504	G	51	A	147	AF=0.75	0/0/0/1	4	5.57949e-12	0.805674	EEF1E1, EEF1E1-MUTED
6	8082703	G	68	A	189	AF=0.75	0/0/0/1	4	2.33279e-14	0.614051	EEF1E1, EEF1E1-MUTED
6	8086636	A	181	G	68	AF=0.25	0/0/0/1	4	5.02689e-13	0.420695	EEF1E1, EEF1E1-MUTED
6	10895260	A	59	G	24	AF=0.25	0/0/0/1	4	0.000154559	0.446538	SYCP2L
6	10961454	C	8	A	30	AF=0.75	0/0/0/1	4	0.000471987	0.708804	SYCP2L
6	11138038	A	34	G	83	AF=0.75	0/0/0/1	4	6.77566e-06	0.33623	AK129879, SMIM13
6	11729299	C	8	T	29	AF=0.75	0/0/0/1	4	0.000752897	0.708717	ADTRP
6	11729440	G	26	T	56	AF=0.75	0/0/0/1	4	0.00122038	0.161868	ADTRP
6	11731999	T	9	A	25	AF=0.75	0/0/0/1	4	0.00904119	0.843636	ADTRP
6	11732787	G	20	A	91	AF=0.75	0/0/0/1	4	5.25256e-12	0.0998655	ADTRP
6	12124587	C	2	G	20	AF=0.75	0/0/0/1	4	0.000121117	0.135238	HIVEP1
6	12125772	A	47	G	25	AF=0.25	0/0/0/1	4	0.0127746	0.0754335	HIVEP1
6	12127063	A	1	T	11	AF=0.75	0/0/0/1	4	0.00634766	0.316025	HIVEP1
6	13256947	G	3	A	17	AF=0.75	0/0/0/1	4	0.00257683	0.439374	PHACTR1
6	13280387	T	4	G	16	AF=0.75	0/0/0/1	4	0.0118179	0.797669	LOC100130357, PHACTR1, TBC1D7
6	13328651	G	16	C	36	AF=0.75	0/0/0/1	4	0.00778744	0.338139	TBC1D7
6	13619629	A	0	G	10	AF=0.75	0/0/0/1	4	0.00195312	0.0760412	NOL7
6	13624966	G	2	C	18	AF=0.75	0/0/0/1	4	0.000402451	0.193072	RANBP9
6	13630864	T	1	G	13	AF=0.75	0/0/0/1	4	0.00183105	0.212637	RANBP9
6	13633522	T	3	A	13	AF=0.75	0/0/0/1	4	0.0212708	0.774801	RANBP9
6	13787304	T	7	C	31	AF=0.75	0/0/0/1	4	0.000116167	0.4541	MCUR1
6	13787578	G	41	A	137	AF=0.75	0/0/0/1	4	2.7466e-13	0.603731	MCUR1
6	13790393	C	79	G	23	AF=0.25	0/0/0/1	4	2.2821e-08	0.647752	MCUR1
6	13978275	A	29	C	127	AF=0.75	0/0/0/1	4	7.91244e-16	0.0648043	RNF182
6	13978854	G	70	T	32	AF=0.25	0/0/0/1	4	0.000213391	0.138148	RNF182
6	15003655	C	13	T	4	AF=0.25	0/0/0/1	4	0.0490417	1	None
6	15257068	G	0	A	10	AF=0.75	0/0/0/1	4	0.00195312	0.0760412	JARID2
6	15268051	C	0	T	10	AF=0.75	0/0/0/1	4	0.00195312	0.0760412	JARID2
6	15273252	A	1	G	11	AF=0.75	0/0/0/1	4	0.00634766	0.316025	JARID2
6	15397441	T	7	C	18	AF=0.75	0/0/0/1	4	0.0432853	0.81718	JARID2
6	15468876	C	41	G	153	AF=0.75	0/0/0/1	4	2.14145e-16	0.245513	JARID2
6	15492000	G	0	A	11	AF=0.75	0/0/0/1	4	0.000976562	0.0765626	JARID2
6	15511581	G	35	A	106	AF=0.75	0/0/0/1	4	1.69447e-09	1	JARID2
6	15513482	G	11	A	48	AF=0.75	0/0/0/1	4	1.24163e-06	0.295202	JARID2
6	15560110	C	16	T	5	AF=0.25	0/0/0/1	4	0.0266037	1	DTNBP1
6	15561257	T	51	C	21	AF=0.25	0/0/0/1	4	0.000534964	0.415188	DTNBP1
6	16239266	G	3	A	17	AF=0.75	0/0/0/1	4	0.00257683	0.439374	GMPR
6	17618898	G	5	A	20	AF=0.75	0/0/0/1	4	0.00407732	0.651772	NUP153
6	17631969	G	0	A	10	AF=0.75	0/0/0/1	4	0.00195312	0.0760412	NUP153
6	17675246	T	85	C	229	AF=0.75	0/0/0/1	4	2.05549e-16	0.397157	NUP153
6	17688798	G	642	A	212	AF=0.25	0/0/0/1	4	5.47453e-51	0.937022	NUP153
6	17760365	A	42	G	8	AF=0.25	0/0/0/1	4	1.16356e-06	0.189905	KIF13A
6	17760540	A	11	G	56	AF=0.75	0/0/0/1	4	2.1458e-08	0.12054	KIF13A
6	17776213	G	0	A	11	AF=0.75	0/0/0/1	4	0.000976562	0.0765626	KIF13A
6	17799575	A	109	G	41	AF=0.25	0/0/0/1	4	2.61385e-08	0.509685	KIF13A
6	17815777	A	1	C	13	AF=0.75	0/0/0/1	4	0.00183105	0.212637	KIF13A
6	17850428	A	0	G	11	AF=0.75	0/0/0/1	4	0.000976562	0.0765626	KIF13A
6	17973021	C	0	T	11	AF=0.75	0/0/0/1	4	0.000976562	0.0765626	KIF13A
6	17980838	C	0	A	10	AF=0.75	0/0/0/1	4	0.00195312	0.0760412	KIF13A
6	18133256	G	0	A	10	AF=0.75	0/0/0/1	4	0.00195312	0.0760412	TPMT
6	18138552	A	0	G	10	AF=0.75	0/0/0/1	4	0.00195312	0.0760412	TPMT
6	20109956	A	28	G	71	AF=0.75	0/0/0/1	4	1.82576e-05	0.485918	MBOAT1
6	20425458	G	2	A	13	AF=0.75	0/0/0/1	4	0.00738525	0.384456	E2F3
6	21200282	A	23	G	5	AF=0.25	0/0/0/1	4	0.000912234	0.513649	CDKAL1
6	21201493	G	88	A	18	AF=0.25	0/0/0/1	4	2.97077e-12	0.0568855	CDKAL1
6	21258942	T	20	C	7	AF=0.25	0/0/0/1	4	0.0191573	1	None
6	22389757	A	0	G	10	AF=0.75	0/0/0/1	4	0.00195312	0.0760412	None
6	22677278	A	0	G	10	AF=0.75	0/0/0/1	4	0.00195312	0.0760412	None
6	24419200	C	15	T	65	AF=0.75	0/0/0/1	4	1.41147e-08	0.24461	MRS2
6	24650671	C	85	T	251	AF=0.75	0/0/0/1	4	3.64988e-20	0.899782	TDP2
6	24650731	T	153	G	493	AF=0.75	0/0/0/1	4	1.38605e-42	0.467311	TDP2
6	24653376	G	205	A	645	AF=0.75	0/0/0/1	4	1.06178e-53	0.579282	TDP2
6	24659172	G	1	C	10	AF=0.75	0/0/0/1	4	0.0117188	0.311724	TDP2
6	24665340	A	9	C	28	AF=0.75	0/0/0/1	4	0.00256321	1	TDP2
6	24702964	T	2	A	12	AF=0.75	0/0/0/1	4	0.0129395	0.539593	ACOT13
6	24779291	T	12	C	62	AF=0.75	0/0/0/1	4	2.85555e-09	0.0823235	GMNN
6	24785582	C	9	G	22	AF=0.75	0/0/0/1	4	0.0294494	0.677918	GMNN
6	26099908	T	0	C	11	AF=0.75	0/0/0/1	4	0.000976562	0.0765626	None
6	26112893	T	13	C	38	AF=0.75	0/0/0/1	4	0.000621043	1	None
6	26113340	T	72	C	35	AF=0.25	0/0/0/1	4	0.000445302	0.073637	None
6	26113398	T	86	A	23	AF=0.25	0/0/0/1	4	9.59306e-10	0.378017	None
6	26113616	T	352	A	94	AF=0.25	0/0/0/1	4	3.86382e-36	0.0557303	None
6	26113994	T	413	G	143	AF=0.25	0/0/0/1	4	2.29064e-31	0.695307	None
6	26114653	G	25	A	90	AF=0.75	0/0/0/1	4	8.36903e-10	0.452834	HIST1H2BC
6	26118246	T	33	A	10	AF=0.25	0/0/0/1	4	0.000606107	1	HIST1H2BC
6	26119459	G	29	A	8	AF=0.25	0/0/0/1	4	0.000752897	0.708717	HIST1H2BC
6	26123539	G	37	C	17	AF=0.25	0/0/0/1	4	0.00907334	0.272885	HIST1H2BC
6	26125711	A	87	C	33	AF=0.25	0/0/0/1	4	8.6805e-07	0.527584	HIST1H2AC
6	26128618	A	47	G	14	AF=0.25	0/0/0/1	4	2.71919e-05	0.769728	HIST1H2AC
6	26128766	G	88	A	28	AF=0.25	0/0/0/1	4	2.08836e-08	0.914724	HIST1H2AC
6	26130690	A	51	G	19	AF=0.25	0/0/0/1	4	0.000166042	0.679445	HIST1H2AC
6	26132504	T	2	C	22	AF=0.75	0/0/0/1	4	3.5882e-05	0.0611394	HIST1H2AC
6	26134723	T	3	C	18	AF=0.75	0/0/0/1	4	0.00148964	0.321596	HIST1H2AC
6	26180634	G	0	C	11	AF=0.75	0/0/0/1	4	0.000976562	0.0765626	None
6	26189615	A	2	G	12	AF=0.75	0/0/0/1	4	0.0129395	0.539593	None
6	26198046	T	28	A	78	AF=0.75	0/0/0/1	4	1.25122e-06	0.736853	HIST1H3D
6	26278119	G	31	A	114	AF=0.75	0/0/0/1	4	2.34979e-12	0.338794	None
6	26279235	G	22	C	52	AF=0.75	0/0/0/1	4	0.000642807	0.348443	None
6	27326863	G	19	A	44	AF=0.75	0/0/0/1	4	0.00222753	0.382021	ZNF204P
6	27370046	T	29	G	7	AF=0.25	0/0/0/1	4	0.000312551	0.564568	None
6	27370473	T	31	C	9	AF=0.25	0/0/0/1	4	0.000679548	0.855636	None
6	27418847	T	33	G	7	AF=0.25	0/0/0/1	4	4.2277e-05	0.361088	ZNF184
6	27425185	C	45	A	14	AF=0.25	0/0/0/1	4	6.53063e-05	1	ZNF184
6	27440545	G	18	A	7	AF=0.25	0/0/0/1	4	0.0432853	0.81718	ZNF184
6	27443536	G	17	T	3	AF=0.25	0/0/0/1	4	0.00257683	0.439374	None
6	28320339	T	0	C	11	AF=0.75	0/0/0/1	4	0.000976562	0.0765626	ZKSCAN3, ZSCAN31
6	33542538	A	61	G	15	AF=0.25	0/0/0/1	4	9.84285e-08	0.353667	BAK1
6	33542661	G	10	T	36	AF=0.75	0/0/0/1	4	0.000156417	0.734159	BAK1
6	33659046	G	15	A	5	AF=0.25	0/0/0/1	4	0.0413895	1	ITPR3
6	33663055	G	3	A	16	AF=0.75	0/0/0/1	4	0.00442505	0.437969	ITPR3, SBP1
6	33663171	A	3	C	24	AF=0.75	0/0/0/1	4	4.92334e-05	0.119377	ITPR3, SBP1
6	33664730	T	41	C	17	AF=0.25	0/0/0/1	4	0.00223255	0.449537	MNF1, SBP1
6	33667117	C	21	G	7	AF=0.25	0/0/0/1	4	0.012541	1	MNF1
6	33667199	A	47	G	23	AF=0.25	0/0/0/1	4	0.00558267	0.130376	MNF1
6	33676556	G	0	A	11	AF=0.75	0/0/0/1	4	0.000976562	0.0765626	MNF1
6	33740025	C	246	T	75	AF=0.25	0/0/0/1	4	2.16426e-22	0.519919	LEMD2
6	33754301	T	3	C	22	AF=0.75	0/0/0/1	4	0.000156522	0.167542	LEMD2
6	33756532	G	21	A	37	AF=0.75	0/0/0/1	4	0.0479403	0.0670634	LEMD2
6	34208843	C	43	T	8	AF=0.25	0/0/0/1	4	6.86712e-07	0.145931	HMGA1
6	34222939	A	0	G	10	AF=0.75	0/0/0/1	4	0.00195312	0.0760412	None
6	34388510	G	0	A	10	AF=0.75	0/0/0/1	4	0.00195312	0.0760412	RPS10, RPS10-NUDT3
6	34501529	G	0	A	11	AF=0.75	0/0/0/1	4	0.000976562	0.0765626	PACSIN1
6	34659054	T	1	C	13	AF=0.75	0/0/0/1	4	0.00183105	0.212637	C6orf106
6	34739726	T	36	G	17	AF=0.25	0/0/0/1	4	0.0126603	0.265735	SNRPC
6	34739875	A	46	G	19	AF=0.25	0/0/0/1	4	0.00109008	0.473418	SNRPC
6	34857059	G	4	C	30	AF=0.75	0/0/0/1	4	6.16489e-06	0.0772008	ANKS1A
6	34866120	T	0	C	10	AF=0.75	0/0/0/1	4	0.00195312	0.0760412	ANKS1A
6	35001578	C	0	T	10	AF=0.75	0/0/0/1	4	0.00195312	0.0760412	ANKS1A
6	35057331	G	46	A	9	AF=0.25	0/0/0/1	4	4.33638e-07	0.161732	ANKS1A
6	35805133	G	20	A	57	AF=0.75	0/0/0/1	4	2.92631e-05	0.895272	SRPK1
6	35995633	A	71	G	22	AF=0.25	0/0/0/1	4	3.48248e-07	0.811976	MAPK14
6	36017017	A	2	C	11	AF=0.75	0/0/0/1	4	0.0224609	0.53864	MAPK14
6	36048417	A	18	G	6	AF=0.25	0/0/0/1	4	0.0226558	1	MAPK14
6	36053147	C	19	T	4	AF=0.25	0/0/0/1	4	0.00259948	0.479516	MAPK14
6	36069489	A	3	G	25	AF=0.75	0/0/0/1	4	2.74405e-05	0.123032	MAPK14
6	36077961	G	331	A	116	AF=0.25	0/0/0/1	4	5.09023e-25	0.662134	MAPK14
6	36082573	C	16	A	4	AF=0.25	0/0/0/1	4	0.0118179	0.797669	None
6	36097132	A	6	G	19	AF=0.75	0/0/0/1	4	0.0146333	1	None
6	36198421	T	48	C	12	AF=0.25	0/0/0/1	4	3.18363e-06	0.456296	BRPF3
6	36510596	G	2	A	16	AF=0.75	0/0/0/1	4	0.00131226	0.27429	STK38
6	36841689	A	0	T	10	AF=0.75	0/0/0/1	4	0.00195312	0.0760412	C6orf89, PPIL1
6	36841756	T	0	G	11	AF=0.75	0/0/0/1	4	0.000976562	0.0765626	C6orf89, PPIL1
6	36870751	A	21	T	8	AF=0.25	0/0/0/1	4	0.0241195	0.83007	C6orf89
6	36884912	T	40	C	13	AF=0.25	0/0/0/1	4	0.00026854	1	C6orf89
6	36887476	C	373	T	128	AF=0.25	0/0/0/1	4	8.41833e-29	0.796439	C6orf89
6	36893083	A	99	G	38	AF=0.25	0/0/0/1	4	1.87794e-07	0.48961	C6orf89
6	36893619	A	141	T	53	AF=0.25	0/0/0/1	4	2.06394e-10	0.455938	C6orf89
6	36893875	G	175	T	63	AF=0.25	0/0/0/1	4	2.22915e-13	0.60054	C6orf89
6	36894685	G	138	A	33	AF=0.25	0/0/0/1	4	1.80394e-16	0.0931537	C6orf89
6	36895835	C	180	T	74	AF=0.25	0/0/0/1	4	2.29122e-11	0.128523	C6orf89
6	36940137	C	11	T	25	AF=0.75	0/0/0/1	4	0.0288167	0.443251	MTCH1
6	36940805	T	13	C	3	AF=0.25	0/0/0/1	4	0.0212708	0.774801	MTCH1
6	36948246	C	23	T	7	AF=0.25	0/0/0/1	4	0.00522288	1	MTCH1
6	36952226	G	3	A	27	AF=0.75	0/0/0/1	4	8.43033e-06	0.059043	MTCH1
6	38706033	A	0	G	10	AF=0.75	0/0/0/1	4	0.00195312	0.0760412	DNAH8
6	38719048	T	0	A	11	AF=0.75	0/0/0/1	4	0.000976562	0.0765626	DNAH8
6	39079103	G	31	A	15	AF=0.25	0/0/0/1	4	0.0258961	0.23522	SAYSD1
6	39182087	G	0	A	11	AF=0.75	0/0/0/1	4	0.000976562	0.0765626	KCNK5
6	39182400	C	0	T	10	AF=0.75	0/0/0/1	4	0.00195312	0.0760412	KCNK5
6	39925922	G	90	A	29	AF=0.25	0/0/0/1	4	1.85722e-08	1	None
6	41034442	A	118	T	39	AF=0.25	0/0/0/1	4	1.98388e-10	1	UNC5CL
6	41036770	A	16	G	5	AF=0.25	0/0/0/1	4	0.0266037	1	OARD1, UNC5CL
6	41512462	G	2	T	18	AF=0.75	0/0/0/1	4	0.000402451	0.193072	None
6	41512497	T	2	G	12	AF=0.75	0/0/0/1	4	0.0129395	0.539593	None
6	41552040	T	1	C	18	AF=0.75	0/0/0/1	4	7.62939e-05	0.0597552	FOXP4
6	41568064	G	13	A	37	AF=0.75	0/0/0/1	4	0.000936223	0.870632	FOXP4
6	41738158	C	36	T	7	AF=0.25	0/0/0/1	4	8.96304e-06	0.219851	FRS3
6	41753380	G	31	T	10	AF=0.25	0/0/0/1	4	0.00145049	1	PRICKLE4
6	41762808	C	14	G	40	AF=0.75	0/0/0/1	4	0.000535436	0.875451	None
6	41888827	C	81	G	228	AF=0.75	0/0/0/1	4	2.41642e-17	0.645594	MED20
6	41903007	T	246	C	837	AF=0.75	0/0/0/1	4	8.10377e-76	0.0855146	CCND3
6	42025402	A	8	G	42	AF=0.75	0/0/0/1	4	1.16356e-06	0.189905	TAF8
6	42068975	C	0	T	10	AF=0.75	0/0/0/1	4	0.00195312	0.0760412	C6orf132
6	42162388	A	18	G	5	AF=0.25	0/0/0/1	4	0.010622	1	GUCA1B
6	42166826	C	0	T	10	AF=0.75	0/0/0/1	4	0.00195312	0.0760412	None
6	42167161	A	28	T	9	AF=0.25	0/0/0/1	4	0.00256321	1	None
6	42169045	A	22	G	7	AF=0.25	0/0/0/1	4	0.00813006	1	None
6	42532102	C	50	T	193	AF=0.75	0/0/0/1	4	5.25843e-21	0.119758	UBR2
6	42573513	T	47	C	24	AF=0.25	0/0/0/1	4	0.00855454	0.0992588	UBR2
6	42600319	A	23	G	56	AF=0.75	0/0/0/1	4	0.000263637	0.435218	UBR2
6	42643068	A	2	G	14	AF=0.75	0/0/0/1	4	0.00418091	0.386766	UBR2
6	42643096	A	2	G	23	AF=0.75	0/0/0/1	4	1.94311e-05	0.0617784	UBR2
6	42653737	G	0	A	11	AF=0.75	0/0/0/1	4	0.000976562	0.0765626	UBR2
6	42660822	G	5	C	28	AF=0.75	0/0/0/1	4	6.61877e-05	0.230913	UBR2
6	42833594	C	70	T	33	AF=0.25	0/0/0/1	4	0.000340998	0.110601	GLTSCR1L
6	42849523	A	6	T	22	AF=0.75	0/0/0/1	4	0.00371917	0.828117	RPL7L1
6	42850919	G	4	T	19	AF=0.75	0/0/0/1	4	0.00259948	0.479516	RPL7L1
6	42851396	G	2	A	13	AF=0.75	0/0/0/1	4	0.00738525	0.384456	RPL7L1
6	42903763	C	19	G	47	AF=0.75	0/0/0/1	4	0.000756107	0.478256	CNPY3
6	42903766	T	17	G	48	AF=0.75	0/0/0/1	4	0.000152107	0.886067	CNPY3
6	42904274	G	13	T	38	AF=0.75	0/0/0/1	4	0.000621043	1	CNPY3
6	42905235	A	1	G	9	AF=0.75	0/0/0/1	4	0.0214844	0.46815	CNPY3
6	42910666	T	1	C	15	AF=0.75	0/0/0/1	4	0.000518799	0.143034	None
6	42944773	T	23	C	70	AF=0.75	0/0/0/1	4	1.10263e-06	1	PEX6
6	42946490	C	12	A	66	AF=0.75	0/0/0/1	4	3.48585e-10	0.0500686	PEX6
6	42980218	G	341	T	1101	AF=0.75	0/0/0/1	4	2.08965e-93	0.247848	MEA1
6	43014298	T	13	C	45	AF=0.75	0/0/0/1	4	3.01159e-05	0.762208	CUL7, KLC4
6	43014299	T	12	C	46	AF=0.75	0/0/0/1	4	8.21966e-06	0.544677	CUL7, KLC4
6	43022789	A	64	T	13	AF=0.25	0/0/0/1	4	3.02363e-09	0.114066	KLC4, MRPL2
6	43472708	T	157	C	66	AF=0.25	0/0/0/1	4	9.86935e-10	0.121707	TJAP1
6	43484643	G	80	A	32	AF=0.25	0/0/0/1	4	6.56634e-06	0.383389	YIPF3
6	43485811	G	38	A	15	AF=0.25	0/0/0/1	4	0.00219019	0.633894	POLR1C
6	43487363	A	123	C	34	AF=0.25	0/0/0/1	4	4.90873e-13	0.357926	POLR1C
6	43490809	C	122	T	39	AF=0.25	0/0/0/1	4	3.74981e-11	0.856135	POLR1C, XPO5
6	43497318	A	25	T	11	AF=0.25	0/0/0/1	4	0.0288167	0.443251	XPO5
6	43511574	T	17	C	5	AF=0.25	0/0/0/1	4	0.0169005	1	XPO5
6	43581586	G	77	A	22	AF=0.25	0/0/0/1	4	2.49283e-08	0.56385	POLH
6	43582091	A	71	T	18	AF=0.25	0/0/0/1	4	1.29687e-08	0.329393	POLH
6	43582584	C	67	T	12	AF=0.25	0/0/0/1	4	2.04884e-10	0.0503473	POLH
6	43742527	G	0	A	11	AF=0.75	0/0/0/1	4	0.000976562	0.0765626	VEGFA
6	43742579	T	6	C	18	AF=0.75	0/0/0/1	4	0.0226558	1	VEGFA
6	43745577	C	25	T	49	AF=0.75	0/0/0/1	4	0.00708425	0.105836	VEGFA
6	43747577	T	314	C	95	AF=0.25	0/0/0/1	4	1.90013e-28	0.424588	VEGFA
6	43749163	T	3	C	24	AF=0.75	0/0/0/1	4	4.92334e-05	0.119377	VEGFA
6	43749230	C	3	T	18	AF=0.75	0/0/0/1	4	0.00148964	0.321596	VEGFA
6	43750551	C	3	G	13	AF=0.75	0/0/0/1	4	0.0212708	0.774801	VEGFA
6	43750556	G	3	A	13	AF=0.75	0/0/0/1	4	0.0212708	0.774801	VEGFA
6	43750587	G	3	C	20	AF=0.75	0/0/0/1	4	0.000488281	0.23328	VEGFA
6	43751075	A	4	G	25	AF=0.75	0/0/0/1	4	0.000103716	0.20086	VEGFA
6	43751669	G	7	C	37	AF=0.75	0/0/0/1	4	5.29958e-06	0.221604	VEGFA
6	43753051	C	241	T	740	AF=0.75	0/0/0/1	4	1.4507e-59	0.768185	VEGFA
6	43753722	G	427	A	143	AF=0.25	0/0/0/1	4	8.28197e-34	0.961435	VEGFA
6	44064064	A	14	T	4	AF=0.25	0/0/0/1	4	0.0308838	1	None
6	44065879	C	17	T	5	AF=0.25	0/0/0/1	4	0.0169005	1	None
6	44074167	G	19	C	5	AF=0.25	0/0/0/1	4	0.00661075	0.814743	None
6	44074976	T	24	C	11	AF=0.25	0/0/0/1	4	0.0409596	0.433903	None
6	44077376	C	25	T	12	AF=0.25	0/0/0/1	4	0.047031	0.341173	None
6	44081510	C	497	T	166	AF=0.25	0/0/0/1	4	3.04072e-39	1	MRPL14
6	44091535	G	0	T	10	AF=0.75	0/0/0/1	4	0.00195312	0.0760412	MRPL14
6	44119125	C	43	T	19	AF=0.25	0/0/0/1	4	0.00315606	0.305928	TMEM63B
6	44119145	T	56	C	17	AF=0.25	0/0/0/1	4	5.26868e-06	0.788685	TMEM63B
6	44121214	A	93	T	27	AF=0.25	0/0/0/1	4	1.11305e-09	0.598418	TMEM63B
6	44121216	T	90	C	27	AF=0.25	0/0/0/1	4	4.16682e-09	0.670918	TMEM63B
6	44202637	C	1	G	17	AF=0.75	0/0/0/1	4	0.000144958	0.0588118	None
6	47445789	A	47	C	10	AF=0.25	0/0/0/1	4	7.51304e-07	0.222768	CD2AP
6	47469881	A	0	T	10	AF=0.75	0/0/0/1	4	0.00195312	0.0760412	CD2AP
6	47490193	A	3	G	18	AF=0.75	0/0/0/1	4	0.00148964	0.321596	CD2AP
6	49576183	C	37	A	15	AF=0.25	0/0/0/1	4	0.00318525	0.522974	RHAG
6	52229559	A	15	G	4	AF=0.333	0/0/0/1	3	0.0192108	0.334181	PAQR8
6	52531615	C	51	G	115	AF=0.667	0/0/0/1	3	7.45396e-07	0.510828	LOC730101
6	56354381	C	29	G	10	AF=0.333	0/0/0/1	3	0.00337785	0.395952	DST
6	56910344	T	6	C	18	AF=0.667	0/0/0/1	3	0.0226558	0.517006	None
[truncated: 3,728 more rows]

## Sheet: Rep2_False_Negative_ASE
Chr	Position	Ref allele	# RNA-seq reads of ref allele	Alt allele	# RNA-seq reads of alt allele	Frequency of alt allele in WGS	Genotype in WGS	CN	Binomial test p=0.5	Binomial test p=AF	Gene Overlap
[truncated: 3,844 more rows]
