# Supplementary material for: Comprehensive, integrated, and phased whole-genome analysis of the primary ENCODE cell line K562
Source: HighWire-hosted journal article supplement (doi:10.1101/gr.234948.118), 2019-02-08
Supplement: Supplemental_Table_S13.xlsx [file Supplemental_Table_S13.xlsx]

## Sheet: CgI_joined_final_for_revision
hg19; 1-based genomic coordinate counting
Table S13. K562 CpG Islands with Allele-Specific Methylation
Chr	Start	End	CpG Island	Haplotype 1 Methylated	Haplotype 1 Unmethylated	Haplotype 2 Methylated	Haplotype 2 Unmethylated	Fisher P-value	Total Reads	q value	Gene - Proximal Relationship
1	1910268	1913800	CGI_149	32.5	19.5	52	87.5	0.00314701	191.5	0.0854837	KIAA1751-intragenic
1	1990779	1991171	CGI_159	8	13	2	35	0.00281246	58	0.0771377	PRKCZ-intragenic
1	3104956	3105253	CGI_246	9	36.5	0.5	61	0.000269854	107	0.0113782	PRDM16-intragenic
1	6265825	6266778	CGI_318	64	3.5	0	55.5	5.70894e-31	123	5.37592e-28	RNF207-intragenic,RNF207-upstream
1	42928797	42929500	CGI_981	14.5	18.5	13.5	0.5	0.000197504	47	0.00885633	CCDC30-intragenic,CCDC30-upstream
1	45956345	45956893	CGI_1045	0	56	41	13.5	9.89548e-19	110.5	2.79547e-16	TESK2-downstream,TESK2-intragenic
1	160771683	160771953	CGI_1845	23	18	2.5	13.5	0.00318271	57	0.08563	LY9-intragenic
1	221057463	221057757	CGI_2209	32	14.6667	0	38	3.21463e-12	84.6667	5.04518e-10	HLX-intragenic
1	221067447	221068185	CGI_2212	12	22.6667	1	45	0.000106188	80.6667	0.00526282	None
1	223936342	223937044	CGI_2229	30.6667	10.6667	35	42	0.00371438	118.333	0.0953921	CAPN2-intragenic
1	245851177	245852514	CGI_2430	19	9	2.33333	27	1.4914e-06	57.3333	0.00010533	KIF26B-downstream,KIF26B-intragenic
2	81421204	81422532	CGI_3033	10	76	1.5	149.5	0.000855583	237	0.0305952	None
2	102090370	102091130	CGI_3185	1	23	3.5	1.5	0.00256831	29	0.0723969	RFX8-intragenic
2	108160701	108160912	CGI_3220	1	41	5.5	13.5	0.00346778	61	0.0902893	None
2	171678546	171680358	CGI_3566	10.5	3	0	10	0.000364489	23.5	0.0143011	GAD1-intragenic
2	175199463	175202639	CGI_3601	58	84.5	10	181	8.22176e-16	333.5	1.65903e-13	SP9-downstream,SP9-intragenic,SP9-upstream
2	176969217	176969895	CGI_3624	13	17.5	0.5	50	5.49447e-07	81	4.29455e-05	HOXD11-intragenic,HOXD11-upstream
2	176986424	176988291	CGI_3630	4.5	23	8	4	0.0023919	39.5	0.0682537	HOXD9-intragenic,HOXD9-upstream
2	177005364	177005666	CGI_3636	0.5	32	18.5	43	0.000216919	94	0.00942764	BC047605-downstream
2	177042751	177043444	CGI_3646	0	23.5	7	11	0.00117961	41.5	0.0401495	HOXD-AS1-downstream,HOXD-AS1-intragenic,HOXD-AS1-intragenic
4	2366421	2367092	CGI_5487	3	91	13.5	65	0.00166098	172.5	0.0515634	ZFYVE28-downstream,ZFYVE28-intragenic
4	26858872	26859408	CGI_5709	0	21	8	6	0.000127593	35	0.00610931	None
4	55991402	55992171	CGI_5810	98	57	7	86	1.09418e-19	248	3.86384e-17	KDR-downstream,KDR-intragenic
4	75858300	75859931	CGI_5870	6	28.5	28	21	0.000552824	83.5	0.0211044	PARM1-intragenic
4	77172587	77173060	CGI_5879	10	33	54.5	13	2.84521e-09	110.5	3.94922e-07	FAM47E-intragenic,FAM47E-STBD1-intragenic,FAM47E-STBD1-upstream,FAM47E-upstream
4	124318307	124319998	CGI_6068	60.5	46	3	118	9.16461e-22	227.5	4.315e-19	SPRY1-intragenic,SPRY1-upstream
4	124426780	124427157	CGI_6069	14	29.5	0	54	3.52334e-06	97.5	0.000226215	None
4	144833114	144833512	CGI_6141	74.5	4	18	55	1.88592e-20	151.5	7.61105e-18	BC029578-intragenic,BC029578-upstream
5	421224	421751	CGI_6369	65	18	24	50.5	8.7231e-09	157.5	9.47799e-07	AHRR-intragenic
5	1746369	1747050	CGI_6488	15	54.5	2.5	59	0.00164453	131	0.0515634	None
5	53813379	53815306	CGI_6670	41	70	20.5	0.5	3.15756e-08	132	2.99308e-06	SNX18-intragenic,SNX18-upstream
5	77268350	77268787	CGI_6804	2.5	35	13	1	2.9357e-09	51.5	3.94922e-07	None
5	89854290	89854956	CGI_6852	0	71	36	2	8.09626e-27	109	4.57438e-24	GPR98-intragenic,GPR98-upstream
5	140174573	140174888	CGI_7112	14.5	42.5	3	55	0.00348373	115	0.0902893	PCDHA1-intragenic,PCDHA2-intragenic,PCDHA2-intragenic
5	140777442	140777938	CGI_7180	0.5	20	9	15	0.00208125	44.5	0.0612452	PCDHGA1-intragenic,PCDHGA2-intragenic,PCDHGA3-intragenic,PCDHGA4-intragenic,PCDHGA5-intragenic,PCDHGA6-intragenic,PCDHGA7-intragenic,PCDHGA8-intragenic,PCDHGB1-intragenic,PCDHGB2-intragenic,PCDHGB3-intragenic,PCDHGB4-intragenic,PCDHGB5-intragenic,PCDHGB5-intragenic,PCDHGB5-upstream
6	10411394	10413857	CGI_7676	31.6667	2	10	10	0.000319191	53.6667	0.0131977	LOC100130275-intragenic,LOC100130275-upstream,TFAP2A-downstream,TFAP2A-intragenic,TFAP2A-intragenic
6	21664507	21665178	CGI_7738	0	44	10.6667	26.3333	7.05196e-05	81	0.00368922	LINC00340-intragenic,LINC00340-upstream
6	34111735	34113944	CGI_8004	30.3333	19.3333	0	30	4.94759e-09	79.6666	6.35315e-07	GRM4-downstream,GRM4-intragenic
6	35744225	35744562	CGI_8037	0.666667	51.3333	8	17	0.000361294	77	0.0143011	CLPSL2-intragenic,CLPSL2-upstream
6	37626026	37626446	CGI_8069	14.3333	26	69	35	0.00119986	144.333	0.0402684	MDGA1-intragenic
6	39271516	39271758	CGI_8080	3.66667	36.3333	17	21	0.000739623	78	0.0271355	KCNK17-intragenic
6	53659254	53660972	CGI_8220	1	70	8	29.5	0.000852639	108.5	0.0305952	LRRC1-intragenic,LRRC1-upstream
6	159589636	159591319	CGI_8665	13.5	47.5	44	46.5	0.00121162	151.5	0.0402684	FNDC1-intragenic,FNDC1-upstream
6	168106020	168106223	CGI_8727	1.5	87	14.5	44.5	4.35596e-05	147.5	0.00246461	None
6	170598214	170601222	CGI_8809	2	65	12	13	9.40588e-07	92	6.81323e-05	DLL1-downstream,DLL1-intragenic
7	295730	296831	CGI_8853	29.5	171	6	153.5	0.000334117	360	0.013484	FAM20C-intragenic
7	29603109	29603328	CGI_9337	8	13	0	35	0.000143253	56	0.00674483	BC038570-downstream,BC038570-intragenic,PRR15-upstream
7	35225363	35226580	CGI_9372	39	67	0	49.5	1.96255e-08	155.5	1.98007e-06	DPY19L2P1-downstream,DPY19L2P1-intragenic
7	35296921	35298218	CGI_9374	4	76	21.5	57.5	0.000167058	159	0.0076119	None
7	39649253	39649510	CGI_9395	15	44	24	4.5	1.2135e-07	87.5	1.10585e-05	LOC646999-intragenic
7	44349111	44349716	CGI_9431	3	19	28.5	17.5	0.000254426	68	0.0108902	CAMK2B-intragenic
7	89950258	89950778	CGI_9754	7	18	17	2	5.58049e-05	44	0.00297451	None
7	143582125	143582610	CGI_10124	10.3333	0.333333	14	18	0.00215564	42.6666	0.0627801	FAM115A-downstream,FAM115A-intragenic
7	156409023	156409294	CGI_10285	0	3.5	22	3.33333	0.00147362	28.8333	0.0468755	None
7	156432433	156433670	CGI_10287	61.5	10.5	0.333333	94	1.93023e-35	166.333	2.72644e-32	BC070228-downstream,BC070228-intragenic,C7orf13-downstream,C7orf13-intragenic,RNF32-intragenic,RNF32-upstream
7	156810572	156814593	CGI_10298	26	121.5	34.3333	61.6667	0.00221516	243.5	0.0638553	None
7	157204348	157204587	CGI_10307	1.5	47.5	35.6667	34.6667	8.28178e-09	119.333	9.35842e-07	DNAJB6-intragenic
7	158789486	158790019	CGI_10392	19.5	10	9.66667	54.3333	2.04058e-06	93.5	0.000137254	None
8	11607316	11607769	CGI_10589	24	7	3	81.5	1.38991e-15	115.5	2.61766e-13	GATA4-intragenic
8	48649766	48651653	CGI_10817	8	1	0	6	0.0013986	15	0.0454144	CEBPD-downstream,CEBPD-intragenic,KIAA0146-intragenic
8	57030196	57030884	CGI_10861	14.5	75	1	103	0.000155783	193.5	0.00721453	None
9	133710260	133711285	CGI_12322	622.5	9	9	223	4.22377e-182	863.5	1.19321e-178	ABL1-intragenic,ABL1-upstream
9	134151853	134153015	CGI_12336	170	328.5	1	202	2.09024e-28	701.5	1.47623e-25	FAM78A-downstream,FAM78A-intragenic
9	140777131	140777407	CGI_12659	3	48	12	28	0.00342503	91	0.0902893	AK128414-intragenic,CACNA1B-intragenic
10	3598475	3598930	CGI_13818	0	14	19	3	1.79122e-07	36	1.48829e-05	BC037918-intragenic
10	13515185	13515427	CGI_13873	16	23	29.5	5	9.63413e-05	73.5	0.00486008	BEND7-intragenic
10	13516165	13516747	CGI_13874	3	23	16	11.5	0.000572015	53.5	0.0212624	BEND7-intragenic
10	70660525	70661473	CGI_14175	17	17.5	1	46.5	3.72217e-07	82	3.00432e-05	DDX50-intragenic,DDX50-upstream
10	71389862	71390355	CGI_14187	0	72	14	54	1.89311e-05	140	0.00116262	C10orf35-intragenic,C10orf35-upstream
10	81743127	81743547	CGI_14279	19	24	0.5	15.5	0.00107069	59	0.0373418	None
11	2593957	2594201	CGI_15068	3	74.5	11	10	8.17638e-07	98.5	6.07849e-05	KCNQ1-intragenic
11	17034843	17036404	CGI_15198	2.5	23	7	5	0.00201116	37.5	0.0604416	PLEKHA7-downstream,PLEKHA7-intragenic
11	69451136	69458596	CGI_15784	31	61	80.5	65.5	0.00207511	238	0.0612452	CCND1-intragenic,CCND1-upstream
11	69933919	69934209	CGI_15799	15	31	2	33.5	0.00261398	81.5	0.0723969	ANO1-intragenic
11	94245546	94245891	CGI_15979	45	8	2	48.5	2.72707e-18	103.5	7.00361e-16	LOC643037-intragenic,LOC643037-upstream
11	101980632	101982330	CGI_16001	7.5	8	0	30	4.9323e-05	45.5	0.00273211	BC040646-downstream,YAP1-intragenic,YAP1-upstream
11	110581839	110583883	CGI_16027	2	94.5	14	55	0.000209165	165.5	0.00923269	ARHGAP20-downstream,ARHGAP20-intragenic
12	125569828	125570140	CGI_17280	106	13	63	60	9.56358e-11	242	1.42195e-08	AACS-intragenic
15	36871459	36871897	CGI_19015	27	32	1	57.5	5.62981e-09	117.5	6.91488e-07	C15orf41-intragenic,C15orf41-upstream
15	45996453	45996735	CGI_19139	0.5	43	41	22	1.51183e-13	106.5	2.52201e-11	None
15	89952271	89953061	CGI_19532	4	43	43	95	0.00169241	185	0.051968	None
16	1029878	1035327	CGI_19795	18	10	3	16.5	0.00123621	47.5	0.0406082	LMF1-downstream,LMF1-downstream,LMF1-intragenic,LMF1-intragenic,SOX8-intragenic,SOX8-upstream
16	3355020	3356012	CGI_20046	0	61	13.5	17.5	3.17849e-08	92	2.99308e-06	TIGD7-downstream,TIGD7-intragenic,ZNF75A-intragenic,ZNF75A-upstream
16	19566486	19567388	CGI_20234	21.5	26	0	49	7.93888e-09	96.5	9.34472e-07	C16orf62-intragenic,C16orf62-upstream
16	68572891	68573740	CGI_20726	3	84.5	80	57	3.31427e-19	224.5	1.04031e-16	ZFP90-intragenic,ZFP90-upstream
16	87677885	87678660	CGI_20935	25	7	23	36	0.00041586	91	0.0160932	JPH3-intragenic
16	88155592	88156108	CGI_20969	13	35	43.5	32.5	0.000899801	124	0.0317742	None
17	21318650	21320041	CGI_21610	145	1469	52	954	0.000322351	2620	0.0131977	KCNJ12-downstream,KCNJ12-intragenic,KCNJ12-intragenic,KCNJ12-upstream
17	26708225	26708805	CGI_21644	2.5	30	20	10	5.62472e-07	62.5	4.29455e-05	SARM1-intragenic
17	46687527	46688730	CGI_22086	0	34	36	2	3.17731e-18	72	7.47992e-16	HOXB7-downstream,HOXB7-intragenic,HOXB8-upstream
17	63534228	63534626	CGI_22307	22	67	46	28	1.53883e-06	163	0.000106029	AXIN2-intragenic
17	66131393	66131872	CGI_22325	36.5	10.5	11	41	1.88085e-08	99	1.96793e-06	LINC00674-intragenic
18	11708	12372	CGI_22786	139	73.5	14	24	0.0018259	250.5	0.0554641	None
18	28621489	28623117	CGI_22949	25	68.5	44	24	2.28615e-06	161.5	0.000150195	DSC3-downstream,DSC3-intragenic
19	2424005	2427983	CGI_23657	1.5	92.5	21	138	0.00260706	253	0.0723969	LMNB2-upstream,TIMM13-downstream,TIMM13-intragenic,TIMM13-upstream,TMPRSS9-downstream,TMPRSS9-intragenic
19	4607079	4607350	CGI_23865	1	22	18	16	0.000120585	57	0.00587332	None
19	5507247	5507523	CGI_23930	6	56.5	30	6	1.51767e-13	98.5	2.52201e-11	None
19	17392383	17393775	CGI_24456	0	125	7	96	0.00342164	228	0.0902893	ANKLE1-intragenic,ANKLE1-upstream,BABAM1-intragenic
19	17462721	17463137	CGI_24468	47	23	10	22.5	0.00111833	102.5	0.0385278	PLVAP-intragenic
19	22715263	22715576	CGI_24643	15.5	18.5	1	32	3.43785e-05	67	0.00202332	None
19	44324436	44325009	CGI_25125	9	59	25.5	42.5	0.00147679	136	0.0468755	LYPD5-downstream,LYPD5-intragenic
19	52097252	52098000	CGI_25536	0	44	25	36	1.71936e-07	105	1.47188e-05	FLJ30403-downstream,FLJ30403-intragenic
19	54151076	54152241	CGI_25600	10	46	25.5	18.5	2.48819e-05	100	0.00149556	None
19	58951214	58952250	CGI_25815	61.5	37.5	20	46	7.18849e-05	165	0.00369227	ZNF132-downstream,ZNF132-intragenic
20	30135076	30135292	CGI_26059	34.5	9.5	1	54	1.92722e-16	99	4.18799e-14	HM13-intragenic,PSIMCT-1-intragenic,PSIMCT-1-upstream
20	39311378	39312435	CGI_26198	9	35	1	108	5.5599e-05	153	0.00297451	None
20	55685276	55685832	CGI_26356	58	11	40	51.5	1.2559e-07	160.5	1.10873e-05	None
20	61665780	61666555	CGI_26502	51	102	18.5	132.5	9.45797e-06	304	0.00059375	LINC00029-intragenic,LOC63930-intragenic
20	61877854	61878071	CGI_26516	10	6	0.5	19	4.36215e-05	35.5	0.00246461	NKAIN4-intragenic,NKAIN4-upstream
20	62193966	62198985	CGI_26563	62	10	42	28.5	0.000570342	142.5	0.0212624	HELZ2-intragenic
