# Supplementary material for: Comprehensive, integrated, and phased whole-genome analysis of the primary ENCODE cell line K562
Source: HighWire-hosted journal article supplement (doi:10.1101/gr.234948.118), 2019-02-08
Supplement: Supplemental_Table_S14.xlsx [file Supplemental_Table_S14.xlsx]

## Sheet: Table S14 K562_targets_annotate
hg19; 1-based genomic coordinate counting
Table S14 K562 Allele-specific CRISPR targets
Chromosome	Variant position	Haplotype	Target	Position relative to start of variant	Orientation	Phased Genotype	Off-target score	annotation
1	531680	2	GCACAAGTGTGTGTATGATC	-5	3'-5'	1|0	76.477	transcript for ENSG00000239664.2 lincRNA RP5-857K21.3
1	774386	2	ACTCGGGCCCAGCAGTAAAT	-3	5'-3'	1|0	84.0836	transcript for ENSG00000228794.4 processed_transcript RP11-206L10.11
1	848654	1	GCAGTGTCTCCCGCCCATGT	-19	5'-3'	1|0	83.0553	transcript for ENSG00000272438.1 lincRNA RP11-54O7.16
1	875642	1	CTGATTGACAGCGCGCTCCC	0	3'-5'	0|1	90.2082	transcript for ENSG00000187634.6 protein_coding SAMD11
1	939491	2	GTTGGGGGTCTCCTCACATT	-2	5'-3'	0|1	79.1294
1	950113	1	GCTGTCTTACTTCAGTTTCG	-10	3'-5'	1|0	79.5537
1	950113	1	GTCTTACTTCAGTTTCGGGG	-13	3'-5'	1|0	89.4225
1	964766	2	GGGGACATCAGTGTCTATGC	26	5'-3'	1|0	76.7501	transcript for ENSG00000188157.9 protein_coding AGRN
1	991982	2	CTGCTCTCCGGCGTGTATGT	-17	5'-3'	1|0	90.2005
1	997769	1	GTGAACAGCCCCCCCGTCCC	-7	3'-5'	0|1	76.0912	transcript for ENSG00000217801.5 pseudogene RP11-465B22.3
1	997769	2	GGTGAACAGCCCCCCGTCCC	-7	3'-5'	0|1	79.9035	transcript for ENSG00000217801.5 pseudogene RP11-465B22.3
1	1011087	2	ACTCTCAGTCGGGGTTAGGG	-9	5'-3'	1|0	77.9713
1	1011087	2	GACTCTCAGTCGGGGTTAGG	-10	5'-3'	1|0	88.9458
1	1011087	2	GGACTCTCAGTCGGGGTTAG	-11	5'-3'	1|0	87.6575
1	1020923	1	GCTGGGTGGCTCTCGGCAGT	-3	3'-5'	1|0	80.2908	transcript for ENSG00000131591.13 protein_coding C1orf159
1	1211602	1	GGCCCCCCCAGCCGTCCAAA	-13	3'-5'	0|1	86.4524	transcript for ENSG00000230415.1 lincRNA RP5-902P8.10
1	1211602	2	GCCCCCCCCAGCCGTCCAAA	-13	3'-5'	0|1	86.8478	transcript for ENSG00000230415.1 lincRNA RP5-902P8.10
1	1217938	1	GCCTTCCACACAACCGCACT	-5	5'-3'	0|1	89.3422	transcript for ENSG00000162572.15 protein_coding SCNN1D
1	1217938	2	AGCCCCAGTGCGGTTGTGTG	0	3'-5'	0|1	81.2622	transcript for ENSG00000162572.15 protein_coding SCNN1D
1	1217938	2	CTTCCACACACAACCGCACT	-3	5'-3'	0|1	83.9259	transcript for ENSG00000162572.15 protein_coding SCNN1D
1	1299479	2	ACAGGGTTTCACTGTTGGTC	-11	5'-3'	0|1	77.9774
1	1301891	2	GGTGAGTGAATTGATTAGTG	0	5'-3'	0|1	79.26
1	1302215	1	GTTAAAGCGTGGGTGTGAAT	-11	5'-3'	0|1	77.2672
1	1302753	1	GGATGAGTGTGAATTGGTTG	-17	5'-3'	0|1	75.6756
1	1304392	1	ATCTCACTCTGTCCCGAGAC	-7	3'-5'	0|1	89.2603
1	1304392	1	GTCCCGAGACTGGAGTGCGG	-17	3'-5'	0|1	87.2959
1	1304392	2	GCCACCGCACTCCAGTCTCG	-18	5'-3'	0|1	88.6735
1	1323143	1	GTGTGCCTCAGGGCGCACCC	-11	3'-5'	1|0	88.7072	transcript for ENSG00000221978.7 protein_coding CCNL2
1	1323143	2	GTGTGTGCCTCGGCGCACCC	-11	3'-5'	1|0	79.2498	transcript for ENSG00000221978.7 protein_coding CCNL2
1	1490238	1	CTGAGGTGGTCGGGGGTACG	-11	3'-5'	0|1	82.4569	transcript for ENSG00000160075.10 protein_coding SSU72
1	1490238	1	GAGGTGGTCGGGGGTACGTG	-13	3'-5'	0|1	78.6297	transcript for ENSG00000160075.10 protein_coding SSU72
1	1490238	2	AGGTGGTCCGGGGGTACGTG	-13	3'-5'	0|1	84.435	transcript for ENSG00000160075.10 protein_coding SSU72
1	1490238	2	GCGCCAGCCCCACGTACCCC	-20	5'-3'	0|1	79.9235	transcript for ENSG00000160075.10 protein_coding SSU72
1	1585315	1	ACACACACAACCGAGCGTGG	-7	5'-3'	1|0	90.5735	transcript for ENSG00000248333.3 protein_coding CDK11B
1	1606159	2	GTGCGGGTCTCAAGTATGTG	-14	5'-3'	1|0	84.3363	transcript for ENSG00000189339.7 protein_coding SLC35E2B
1	1606159	2	GTGTGCGGGTCTCAAGTATG	-16	5'-3'	1|0	88.7035	transcript for ENSG00000189339.7 protein_coding SLC35E2B
1	1625548	2	GGGCGTTCACTATGTTGGCC	-17	3'-5'	0|1	79.1326
1	1625548	2	GGGGGGGGCGTTCACTATGT	-12	3'-5'	0|1	90.4343
1	1677961	2	GCGGGATCGGCCAGCTGTGG	-13	5'-3'	0|1	76.2716
1	1886346	2	GGTACACACTGTTGCGAAGG	1	3'-5'	1|0	91.1305	transcript for ENSG00000142609.13 protein_coding C1orf222
1	1894972	1	CGAATGGCTGGAACTTTGCC	-5	3'-5'	1|0	78.2621	transcript for ENSG00000142609.13 protein_coding C1orf222
1	1896689	1	AGAAAGTCAGTCGGTCCCCA	-4	3'-5'	1|0	82.0637	transcript for ENSG00000142609.13 protein_coding C1orf222
1	1896689	1	CAGAAAGTCAGTCGGTCCCC	-3	3'-5'	1|0	80.7768	transcript for ENSG00000142609.13 protein_coding C1orf222
1	1896689	2	AGAAAGTCAGTCGGTCCCTC	-3	3'-5'	1|0	78.1298	transcript for ENSG00000142609.13 protein_coding C1orf222
1	1896689	2	GAAAGTCAGTCGGTCCCTCA	-4	3'-5'	1|0	87.6809	transcript for ENSG00000142609.13 protein_coding C1orf222
1	1900363	1	CGCCAGGCGCTGTCTCACCT	33	3'-5'	1|0	79.9253	transcript for ENSG00000142609.13 protein_coding C1orf222
1	1911533	1	CGAGAGTGTATCTAAGCCAC	-5	5'-3'	1|0	86.0563	transcript for ENSG00000142609.13 protein_coding C1orf222
1	2003992	1	CTGGCTGAAGTTACTCCACC	-18	3'-5'	1|0	81.1246	transcript for ENSG00000067606.11 protein_coding PRKCZ
1	2020671	2	ATGGCAGACGCCGATGAGGA	-11	5'-3'	1|0	81.7205	transcript for ENSG00000067606.11 protein_coding PRKCZ
1	2020671	2	CATCGGCGTCTGCCATCGCC	-18	3'-5'	1|0	90.4301	transcript for ENSG00000067606.11 protein_coding PRKCZ
1	2038102	1	ACCTGGCCTGGTGACACGCA	53	3'-5'	1|0	81.7613	transcript for ENSG00000067606.11 protein_coding PRKCZ
1	2038102	1	GGACCTCCATGCGTGTCACC	47	5'-3'	1|0	84.0121	transcript for ENSG00000067606.11 protein_coding PRKCZ
1	2041913	2	GAGGGTACTCCTCTGGTACC	-2	5'-3'	1|0	87.7702	transcript for ENSG00000067606.11 protein_coding PRKCZ
1	2041913	2	GGAAACAGAGGGTACTCCTC	-9	5'-3'	1|0	84.3126	transcript for ENSG00000067606.11 protein_coding PRKCZ
1	2052952	2	GGTGGTCATGGCAGTAGTTA	-2	5'-3'	1|0	75.8373	transcript for ENSG00000067606.11 protein_coding PRKCZ
1	2052959	2	CATGGTGGTACTTAAGGTTA	-15	5'-3'	1|0	80.6727	transcript for ENSG00000067606.11 protein_coding PRKCZ
1	2053001	2	AGTAGTTAGGGCTATGGTTA	-15	5'-3'	1|0	80.1082	transcript for ENSG00000067606.11 protein_coding PRKCZ
1	2053001	2	CAGTAGTTAGGGCTATGGTT	-16	5'-3'	1|0	81.3959	transcript for ENSG00000067606.11 protein_coding PRKCZ
1	2058782	1	GAGTTGCAGGCTTGCGATCC	-6	5'-3'	0|1	93.6918	transcript for ENSG00000067606.11 protein_coding PRKCZ
1	2089517	2	CTCTTGTCTGTCGGAAGAGC	-2	5'-3'	1|0	82.0662	transcript for ENSG00000067606.11 protein_coding PRKCZ
1	2095740	1	GAGAGACAGGGACCCTTTAT	-10	5'-3'	1|0	79.7628	transcript for ENSG00000067606.11 protein_coding PRKCZ
1	2221975	1	CAGAACAACAGTTGGCGGGT	-15	5'-3'	1|0	81.9264	transcript for ENSG00000157933.9 protein_coding SKI
1	2221975	2	ACCCCGCCAACTGTTGTTCT	-17	3'-5'	1|0	83.334	transcript for ENSG00000157933.9 protein_coding SKI
1	2221975	2	CACCCCGCCAACTGTTGTTC	-16	3'-5'	1|0	86.1839	transcript for ENSG00000157933.9 protein_coding SKI
1	2304198	2	ACCACCTTGCAGAGCAGCGT	-18	5'-3'	1|0	76.951	transcript for ENSG00000116151.9 protein_coding MORN1
1	2304201	2	CTTGCAGAGCAGCGACCTGT	-16	5'-3'	1|0	82.3078	transcript for ENSG00000116151.9 protein_coding MORN1
1	2304201	2	GAGTGTGGACGACTGCCCAC	-1	3'-5'	1|0	83.4508	transcript for ENSG00000116151.9 protein_coding MORN1
1	2365423	2	CGAGTTTCCTGGGTGCCCGG	1	3'-5'	0|1	78.2911	transcript for ENSG00000149527.13 protein_coding PLCH2
1	2368898	1	AAATAGCACCCACCGCAACT	1	5'-3'	1|0	91.8581	transcript for ENSG00000149527.13 protein_coding PLCH2
1	2370683	1	AAAGACCTTTGGCCCCCCCG	-11	5'-3'	1|0	93.0064	transcript for ENSG00000149527.13 protein_coding PLCH2
1	2370683	1	AAGACCTTTGGCCCCCCCGA	-10	5'-3'	1|0	89.6013	transcript for ENSG00000149527.13 protein_coding PLCH2
1	2370683	1	GACACCCTCGGGGGGGCCAA	-6	3'-5'	1|0	95.3193	transcript for ENSG00000149527.13 protein_coding PLCH2
1	2370683	2	AAAGACCTTTGGCCCCCCGA	-11	5'-3'	1|0	84.5719	transcript for ENSG00000149527.13 protein_coding PLCH2
1	2415196	1	GAGTCAACGCCCCCCACACG	0	3'-5'	2|1	84.9672	transcript for ENSG00000149527.13 protein_coding PLCH2
1	2415196	1	GGGGCGTTGACTCCCGTTTG	10	5'-3'	2|1	89.8133	transcript for ENSG00000149527.13 protein_coding PLCH2
1	2415196	1	GGGGGCGTTGACTCCCGTTT	9	5'-3'	2|1	88.4716	transcript for ENSG00000149527.13 protein_coding PLCH2
1	2415196	1	GGGGGGCGTTGACTCCCGTT	8	5'-3'	2|1	89.0976	transcript for ENSG00000149527.13 protein_coding PLCH2
1	2523660	1	GGCCAGGGATCCCCCCCCGA	-4	3'-5'	0|1	85.4034	transcript for ENSG00000142606.11 protein_coding MMEL1
1	2523660	2	GCCAGGGATCCCCCCCCCGA	-4	3'-5'	0|1	87.226	transcript for ENSG00000142606.11 protein_coding MMEL1
1	2623587	2	ATGCTCGCCTCAGGGGTTGT	-10	3'-5'	1|0	84.9814	transcript for ENSG00000215912.7 protein_coding TTC34
1	2684398	2	CTGTCAGATGCACACCCCCT	-3	3'-5'	1|0	75.2753	transcript for ENSG00000215912.7 protein_coding TTC34
1	2936684	1	CTAGAGGGGACCCCCCCAGA	-5	3'-5'	0|1	79.4447
1	2936684	2	CTAGAGGGGACCCCCCCCAG	-4	3'-5'	0|1	76.3135
1	2938407	2	GCCAACCAGAAGTACTTTGT	-6	5'-3'	0|1	78.4473	exon for ENSG00000169717.5 protein_coding ACTRT2
1	2953745	1	CGCAGGCTGCCTCGGAGTCG	-13	3'-5'	0|1	87.4502
1	2954348	2	GGAGCACGGAGAGCAATCCG	16	3'-5'	0|1	85.4486
1	2959211	1	GGTGGTGCATGCGGGTGCGG	-5	3'-5'	0|1	76.3059
1	3045232	1	AGACCATCCCACCATGCTAC	18	5'-3'	1|0	82.3377	transcript for ENSG00000142611.12 protein_coding PRDM16
1	3045745	1	GTGGATCCTGCCTAGTGTGT	-13	5'-3'	1|0	82.7794	transcript for ENSG00000142611.12 protein_coding PRDM16
1	3111245	2	GGAGACGATGGCGTGTGGCG	19	3'-5'	1|0	83.5159	transcript for ENSG00000142611.12 protein_coding PRDM16
1	3111245	2	GGGAGACGATGGCGTGTGGC	20	3'-5'	1|0	78.3089	transcript for ENSG00000142611.12 protein_coding PRDM16
1	3172416	2	CGGGTGTCAGTGCGGCCACG	16	3'-5'	1|0	83.1798	transcript for ENSG00000142611.12 protein_coding PRDM16
1	3218654	1	GGTCCTAAACTGTTGCTCCT	-5	5'-3'	1|0	75.9256	transcript for ENSG00000142611.12 protein_coding PRDM16
1	3218654	2	CTCTCCTAGGAGCAACAGTT	-2	3'-5'	1|0	76.6337	transcript for ENSG00000142611.12 protein_coding PRDM16
1	3345348	1	AGCCCCCGGTACCTCAGAAT	-6	5'-3'	0|1	84.4353	transcript for ENSG00000142611.12 protein_coding PRDM16
1	3345348	1	ATTCTGAGGTACCGGGGGCT	-9	3'-5'	0|1	85.8711	transcript for ENSG00000142611.12 protein_coding PRDM16
1	3345348	1	CAGCCCCCGGTACCTCAGAA	-7	5'-3'	0|1	75.8463	transcript for ENSG00000142611.12 protein_coding PRDM16
1	3345348	1	CATTCTGAGGTACCGGGGGC	-8	3'-5'	0|1	84.2998	transcript for ENSG00000142611.12 protein_coding PRDM16
1	3345348	2	AGTCCCATTCTGAGGTACGG	-4	3'-5'	0|1	89.0585	transcript for ENSG00000142611.12 protein_coding PRDM16
1	3345348	2	CAGCCCCCGTACCTCAGAAT	-7	5'-3'	0|1	75.7117	transcript for ENSG00000142611.12 protein_coding PRDM16
1	3345348	2	CATTCTGAGGTACGGGGGCT	-9	3'-5'	0|1	84.4104	transcript for ENSG00000142611.12 protein_coding PRDM16
1	3345348	2	GAGTCCCATTCTGAGGTACG	-3	3'-5'	0|1	88.8953	transcript for ENSG00000142611.12 protein_coding PRDM16
1	3382158	1	CAGGTATGCTGGTTCCCGGA	-5	3'-5'	0|1	85.1319	transcript for ENSG00000130762.10 protein_coding ARHGEF16
1	3382158	2	ACAGGTATGCTGGTTCCGGA	-5	3'-5'	0|1	88.9218	transcript for ENSG00000130762.10 protein_coding ARHGEF16
1	3389004	1	GAACAGTCAAGGCCGGGGGG	1	3'-5'	1|0	76.1089	transcript for ENSG00000130762.10 protein_coding ARHGEF16
1	3445536	1	CACAGACACTCGGACCATCT	0	5'-3'	0|1	86.324	transcript for ENSG00000162591.11 protein_coding MEGF6
1	3445536	1	GACACTCGGACCATCTGGGC	4	5'-3'	0|1	80.2826	transcript for ENSG00000162591.11 protein_coding MEGF6
1	3445536	2	GAGTCACACTCGGACCATCT	-4	5'-3'	0|1	85.6411	transcript for ENSG00000162591.11 protein_coding MEGF6
1	3445536	2	GGAGTCACACTCGGACCATC	-5	5'-3'	0|1	88.1231	transcript for ENSG00000162591.11 protein_coding MEGF6
1	3445536	2	GTCGTCTCAGGAGTCACACT	-14	5'-3'	0|1	75.713	transcript for ENSG00000162591.11 protein_coding MEGF6
1	3467071	2	GGGTCGCTATGTTTCAAAGG	-17	5'-3'	1|0	83.5214	transcript for ENSG00000162591.11 protein_coding MEGF6
1	3495280	1	ACTGTCCGCCTTTCCAACAA	-13	5'-3'	0|1	77.8743	transcript for ENSG00000162591.11 protein_coding MEGF6
1	3529295	1	CGCTAATAGGGAGCACTGGA	-19	5'-3'	1|0	82.1341
1	3533921	1	AATAAGGTCACATTCACGGG	-2	3'-5'	1|0	82.25
1	3533921	1	AGGTCACATTCACGGGTGGC	-6	3'-5'	1|0	82.4445
1	3533921	1	GGTCACATTCACGGGTGGCA	-7	3'-5'	1|0	85.5227
1	3533921	2	AAGGTCACATTCACGGGAGC	1	3'-5'	1|0	89.1633
1	3533921	2	ATTCACGGGAGCCGGTGGCA	-7	3'-5'	1|0	88.4913
1	3533921	2	CATTCACGGGAGCCGGTGGC	-6	3'-5'	1|0	83.8176
1	3540200	1	CTGTGGTGCAACATGCGTCT	-19	5'-3'	0|1	90.8434	transcript for ENSG00000238260.1 antisense RP11-46F15.2
1	3542106	1	CGGGGCGAGTCCCCCCACCA	-6	3'-5'	1|0	76.3302	transcript for ENSG00000158109.10 protein_coding TPRG1L
1	3542106	2	GGGGCGAGTCCCCCCCACCA	-6	3'-5'	1|0	80.4093	transcript for ENSG00000158109.10 protein_coding TPRG1L
1	3546264	2	GGAGTCTCGCTCTGTCGGGC	-5	3'-5'	1|0	88.3482	exon for ENSG00000158109.10 protein_coding TPRG1L
1	3566625	1	CAGGCTGCAACAGCCGACGC	2	5'-3'	1|0	85.015	transcript for ENSG00000116213.11 protein_coding WRAP73
1	3566625	2	CGGCTGTTGTGCGCGCCCAG	-13	3'-5'	1|0	98.3441	exon for ENSG00000116213.11 protein_coding WRAP73
1	3566625	2	GCGCGCACAACAGCCGACGC	-6	5'-3'	1|0	95.4639	exon for ENSG00000116213.11 protein_coding WRAP73
1	3566625	2	GTCGGCTGTTGTGCGCGCCC	-11	3'-5'	1|0	90.5229	exon for ENSG00000116213.11 protein_coding WRAP73
1	3575104	1	AGACTGATAGCTGCACCACG	-5	3'-5'	1|0	77.3976	transcript for ENSG00000078900.10 protein_coding TP73
1	3575104	2	GAGACTGATAGCTGCACACG	-5	3'-5'	1|0	75.2102	transcript for ENSG00000078900.10 protein_coding TP73
1	3575104	2	GTGTGCAGCTATCAGTCTCA	-1	5'-3'	1|0	86.0318	transcript for ENSG00000078900.10 protein_coding TP73
1	3604135	1	ATGAGACCTGCGGCCCTTGC	1	5'-3'	1|0	80.9272	transcript for ENSG00000078900.10 protein_coding TP73
1	3604135	1	CAGGTCTCATTGCCCTGCGC	-12	3'-5'	1|0	76.379	transcript for ENSG00000078900.10 protein_coding TP73
1	3643465	2	GATAAATGGGTTCGATGGAT	-12	5'-3'	1|0	87.97	transcript for ENSG00000078900.10 protein_coding TP73
1	3706816	2	CGAGTGAGCCCCACTCCCTC	0	5'-3'	1|0	75.0107	transcript for ENSG00000130764.5 protein_coding LRRC47
1	3720993	1	CGGAAAAAGTTCCCCTTACA	-7	3'-5'	1|0	77.9855
1	3720993	2	GGAAAAAGTTCCCCCTTACA	-7	3'-5'	1|0	82.0987
1	3731654	1	GGCCTTGCGCGAGCGCCTCC	-20	5'-3'	1|0	85.4915	transcript for ENSG00000116198.8 protein_coding CEP104
1	3731654	2	GCCAGGGAGGCGCTCGCGCA	-18	3'-5'	1|0	75.1401	transcript for ENSG00000116198.8 protein_coding CEP104
1	3731654	2	GCCTTGCGCGAGCGCCTCCC	-19	5'-3'	1|0	82.1772	transcript for ENSG00000116198.8 protein_coding CEP104
1	3739271	2	AGTGACTCAGCAGGCATAGT	-5	3'-5'	1|0	76.7633	transcript for ENSG00000116198.8 protein_coding CEP104
1	3745416	1	AGCCCTTACTCTAAGCCTGT	-10	3'-5'	1|0	76.0648	transcript for ENSG00000116198.8 protein_coding CEP104
1	3745416	2	GCCCTTACTCTTTAAGCCTG	-9	3'-5'	1|0	76.295	transcript for ENSG00000116198.8 protein_coding CEP104
1	3749077	2	ACTGACCTACACTACACTCC	-19	3'-5'	0|1	83.3845	transcript for ENSG00000116198.8 protein_coding CEP104
1	3816587	1	AGCCCCCCAACTACTGCCGG	-1	5'-3'	0|1	83.6703	transcript for ENSG00000198912.6 protein_coding C1orf174
1	3816587	1	CGCCCCCGGCAGTAGTTGGG	1	3'-5'	0|1	85.9598	transcript for ENSG00000198912.6 protein_coding C1orf174
1	3816587	1	GAGCCCCCCAACTACTGCCG	-2	5'-3'	0|1	88.6808	transcript for ENSG00000198912.6 protein_coding C1orf174
1	3816587	1	GGAGCCCCCCAACTACTGCC	-3	5'-3'	0|1	78.5421	transcript for ENSG00000198912.6 protein_coding C1orf174
1	3816587	2	GAGCCCCCAACTACTGCCGG	-2	5'-3'	0|1	81.3488	transcript for ENSG00000198912.6 protein_coding C1orf174
1	3816587	2	GGAGCCCCCAACTACTGCCG	-3	5'-3'	0|1	87.1706	transcript for ENSG00000198912.6 protein_coding C1orf174
1	3833398	1	ATCACCCTCTGGGTCGTCGT	0	3'-5'	1|0	78.8252	exon for ENSG00000236423.1 lincRNA RP13-15E13.1
1	3833398	1	CGTCGTCGGGAGCCATGAGA	-14	3'-5'	1|0	78.2215	exon for ENSG00000236423.1 lincRNA RP13-15E13.1
1	3833398	1	GCTCCCGACGACGACCCAGA	-4	5'-3'	1|0	97.0393	exon for ENSG00000236423.1 lincRNA RP13-15E13.1
1	3833398	1	GGCTCCCGACGACGACCCAG	-5	5'-3'	1|0	84.2824	exon for ENSG00000236423.1 lincRNA RP13-15E13.1
1	3833398	2	CATGGCTCCCGACGACCCAG	-8	5'-3'	1|0	91.8721	exon for ENSG00000236423.1 lincRNA RP13-15E13.1
1	3833398	2	GGTCGTCGGGAGCCATGAGA	-14	3'-5'	1|0	92.2286	exon for ENSG00000236423.1 lincRNA RP13-15E13.1
1	4076360	1	AAACAGTCCAGCTGTTGGAC	19	5'-3'	0|1	79.0843
1	4856883	1	ACGGAGAGTGCCCCCCAGTT	-8	5'-3'	0|1	86.689
1	4856883	2	CGGAGAGTGGCCCCCCAGTT	-7	5'-3'	0|1	83.7307
1	4871247	1	CGGTGGTTTCTAGGGGTTGA	5	5'-3'	1|0	82.7295
1	4871247	1	GGAGACAGTACAATTATCGG	-12	5'-3'	1|0	91.9256
1	5094717	2	ATCAGACCCAAGGGGGGGGT	-2	3'-5'	0|1	82.415
1	5099534	1	AGACGCATACATGCAGAGTC	-18	3'-5'	0|1	78.0699
1	5160761	1	AATGGATCCTATATCCTGGC	-2	5'-3'	1|0	82.5701
1	5225628	1	GAGGACATATCACAACACCT	-4	3'-5'	1|0	77.6427
1	5225628	2	ACAACACACCTAGGCCATGT	-13	3'-5'	1|0	75.8595
1	5225628	2	GGACATATCACAACACACCT	-4	3'-5'	1|0	75.6853
1	5262712	1	CAAATCTAAACGCCCATGCT	-6	5'-3'	0|1	84.3965
1	5262712	2	ACAAATCTAACGCCCATGCT	-7	5'-3'	0|1	90.991
1	5304421	1	AGATGTTTCGTTGAGGGTTC	0	3'-5'	1|2	83.4936
1	5304421	1	GAACACAGATGTTTCGTTGA	6	3'-5'	1|2	86.3856
1	5304421	1	GATGTTTCGTTGAGGGTTCT	-1	3'-5'	1|2	78.6848
1	5304421	1	GGAACACAGATGTTTCGTTG	7	3'-5'	1|2	83.3683
1	5304421	2	AGATGTTTCGTTGAGCGTTC	0	3'-5'	1|2	92.5114
1	5304421	2	GATGTTTCGTTGAGCGTTCT	-1	3'-5'	1|2	91.5852
1	5307169	2	CATCCACATTGTAGCATGTG	-16	5'-3'	0|1	75.576
1	5350172	1	GGGGATGGCTAAATAGTTGA	1	5'-3'	1|0	78.6581
1	5350172	2	GTGGATGGCTAAATAGTTGA	-1	5'-3'	1|0	75.2802
1	5351953	1	AACGGAGGGGGGGATGCCAA	-6	5'-3'	1|0	80.4085
1	5351953	2	AATGACAAAAACGGAGCGGG	-15	5'-3'	1|0	77.1641
1	5351953	2	CAATGACAAAAACGGAGCGG	-16	5'-3'	1|0	75.6093
1	5364059	1	GGGCACTTGGTTATTAACTT	89	3'-5'	0|1	76.7256
1	5383809	2	GCTGACCTTCTTGTATGAAA	-5	5'-3'	0|1	75.023
1	5474212	1	CATAGATGCCCCGGGATGCT	64	3'-5'	1|0	82.4444
1	5491278	1	AGTCCTTGTGGGCCCCCCCC	-1	3'-5'	0|1	76.4494
1	5560932	1	ATCTGTCTATCTAGGCATCT	-4	5'-3'	1|0	80.4831
1	5560932	2	ATCTATCTGTCTAGGCATCT	-8	5'-3'	1|0	77.3494
1	5563960	1	GGAAAGCAGGGGCATCCATC	-10	3'-5'	1|0	77.1074
1	5564399	1	CAGTGGAGCCCTCACCGTTA	-18	5'-3'	1|0	91.585
1	5564399	1	GTGTGAGGCTTTGCCCCTAA	-4	3'-5'	1|0	89.1672
1	5564399	2	AGTGGAGCCCTCACCGTTGA	-17	5'-3'	1|0	85.7797
1	5564399	2	GTGGAGCCCTCACCGTTGAG	-16	5'-3'	1|0	75.9469
1	5567669	2	ACGCCATGGCCCCGCACTCT	-14	3'-5'	1|0	88.0401
1	5567669	2	GACGCCATGGCCCCGCACTC	-13	3'-5'	1|0	82.3936
1	5567669	2	GCGGGGCCATGGCGTCTGTC	-6	5'-3'	1|0	85.3985
1	5567669	2	GTTCTGCCTGACAGACGCCA	0	3'-5'	1|0	79.4605
1	5567674	2	GCGGGGCAGGCACGTCTGTC	-11	5'-3'	1|0	86.5894
1	5804525	1	GCCTACCCCCGTGTCAGCAC	-12	3'-5'	0|1	78.8338
1	5804525	2	GCCTACCCCGTGTCAGCACT	-13	3'-5'	0|1	78.0646
1	5804525	2	GGCCTACCCCGTGTCAGCAC	-12	3'-5'	0|1	84.2351
1	5860816	2	AGGAGACGTTCAATGCATCG	-18	5'-3'	1|0	92.6606
1	5860816	2	ATAGGAGACGTTCAATGCAT	-20	5'-3'	1|0	85.0964
1	5860816	2	GGAGACGTTCAATGCATCGG	-17	5'-3'	1|0	97.9881
1	6005963	2	ATGATTCACGCCCTGGGGGG	1	3'-5'	1|0	82.2117	transcript for ENSG00000131697.13 protein_coding NPHP4
1	6040475	1	AGGCGCAAGAGCGTTCAGGC	-4	5'-3'	1|0	84.5745	transcript for ENSG00000131697.13 protein_coding NPHP4
1	6040475	1	CGCCAGGCGCAAGAGCGTTC	-8	5'-3'	1|0	88.903	transcript for ENSG00000131697.13 protein_coding NPHP4
1	6040475	2	GAGGCCTGCCTGAACGCTCT	1	3'-5'	1|0	89.1817	transcript for ENSG00000131697.13 protein_coding NPHP4
1	6040475	2	GCCAGGCGCCAAGAGCGTTC	-7	5'-3'	1|0	90.6848	transcript for ENSG00000131697.13 protein_coding NPHP4
1	6040475	2	GCCTGAACGCTCTTGGCGCC	-6	3'-5'	1|0	92.7947	transcript for ENSG00000131697.13 protein_coding NPHP4
1	6052074	1	CGTCGGGACACTTGGGGTCG	-7	3'-5'	1|0	77.5633	transcript for ENSG00000131697.13 protein_coding NPHP4
1	6052074	1	CTCGTCGGGACACTTGGGGT	-5	3'-5'	1|0	75.1629	transcript for ENSG00000131697.13 protein_coding NPHP4
1	6052074	2	CGGGACACTTGGTGGGGTCG	-7	3'-5'	1|0	88.9185	transcript for ENSG00000131697.13 protein_coding NPHP4
1	6052074	2	GTCGGGACACTTGGTGGGGT	-5	3'-5'	1|0	84.9415	transcript for ENSG00000131697.13 protein_coding NPHP4
1	6384171	1	CTCAGGCTAAGCCACCATAC	-6	5'-3'	0|1	84.3802	transcript for ENSG00000097021.15 protein_coding ACOT7
1	6495381	1	GCGGGAATCATTCTTCAGCC	-18	5'-3'	1|0	78.7575	transcript for ENSG00000187017.10 protein_coding ESPN
1	6550536	1	AGCCTTAGAGCCTTAGACAC	-5	3'-5'	0|1	76.4812	transcript for ENSG00000171680.16 protein_coding PLEKHG5
1	6550536	1	GCCTTAGAGCCTTAGACACC	-6	3'-5'	0|1	85.2714	transcript for ENSG00000171680.16 protein_coding PLEKHG5
1	6550536	2	CGGCCCGAGCCTTAGACACC	-6	3'-5'	0|1	88.1451	transcript for ENSG00000171680.16 protein_coding PLEKHG5
1	6550536	2	CTCCCCGGTGTCTAAGGCTC	-9	5'-3'	0|1	85.7552	transcript for ENSG00000171680.16 protein_coding PLEKHG5
1	6550536	2	GGCCCGAGCCTTAGACACCG	-7	3'-5'	0|1	89.0071	transcript for ENSG00000171680.16 protein_coding PLEKHG5
1	6553024	1	GGGGACATTGGGGGCTATAA	-21	3'-5'	0|1	81.6809	transcript for ENSG00000171680.16 protein_coding PLEKHG5
1	6553024	1	GGGGGACATTGGGGGCTATA	-20	3'-5'	0|1	82.8524	transcript for ENSG00000171680.16 protein_coding PLEKHG5
1	6585847	2	CTCCATCATGTCTCGTGGTC	-13	5'-3'	1|0	90.4504	transcript for ENSG00000162408.10 protein_coding NOL9
1	6608293	1	CGATGGAACCTGGGAGGCGC	-4	3'-5'	1|0	75.6553	transcript for ENSG00000162408.10 protein_coding NOL9
1	6609792	2	GAAGTTAACTGCTTCTAAGG	-14	3'-5'	1|0	76.3919	transcript for ENSG00000162408.10 protein_coding NOL9
1	6807738	2	CGTATCACTGTCACCCACGC	-13	3'-5'	0|1	83.2861
1	6957533	2	GGGGGTGTATATACAGTAGA	22	3'-5'	1|0	78.1092	transcript for ENSG00000171735.14 protein_coding CAMTA1
1	6966241	1	CATTTGACATGACACGAAAG	-20	3'-5'	1|0	85.2653	transcript for ENSG00000171735.14 protein_coding CAMTA1
1	6966241	1	CTCTTTCGTGTCATGTCAAA	-19	5'-3'	1|0	81.4996	transcript for ENSG00000171735.14 protein_coding CAMTA1
1	6966241	2	ACCTGGGAGTACCAATTGCC	6	3'-5'	1|0	75.9543	transcript for ENSG00000171735.14 protein_coding CAMTA1
1	6977909	1	AAGCAAAACCCATCGGGGGC	-17	5'-3'	1|0	78.6964	transcript for ENSG00000171735.14 protein_coding CAMTA1
1	6977909	1	AGCAAAACCCATCGGGGGCG	-16	5'-3'	1|0	80.7197	transcript for ENSG00000171735.14 protein_coding CAMTA1
1	6977909	1	CAAAACCCATCGGGGGCGGG	-14	5'-3'	1|0	85.9754	transcript for ENSG00000171735.14 protein_coding CAMTA1
1	6977909	2	AGATGTCCCCCCCCCCCCGA	-8	3'-5'	1|0	93.3814	transcript for ENSG00000171735.14 protein_coding CAMTA1
1	6977909	2	GATGTCCCCCCCCCCCCGAT	-9	3'-5'	1|0	78.5169	transcript for ENSG00000171735.14 protein_coding CAMTA1
1	6982465	2	GGCCCAAGCAGCTCTCACTT	-12	5'-3'	1|0	75.4207	transcript for ENSG00000171735.14 protein_coding CAMTA1
1	6999736	2	GTCCTCCCCAGGGAATAAAT	-17	3'-5'	1|0	76.4677	transcript for ENSG00000171735.14 protein_coding CAMTA1
1	7019561	1	CGGTGTACCGGGTCCCGGGC	-15	5'-3'	0|1	76.6696	transcript for ENSG00000171735.14 protein_coding CAMTA1
1	7019561	1	CTACCGGTGTACCGGGTCCC	-19	5'-3'	0|1	90.2383	transcript for ENSG00000171735.14 protein_coding CAMTA1
1	7019561	1	CTGCCCGGGACCCGGTACAC	-16	3'-5'	0|1	89.4353	transcript for ENSG00000171735.14 protein_coding CAMTA1
1	7019561	2	GGTGTACCGGGTCCCGGCAG	-14	5'-3'	0|1	84.6112	transcript for ENSG00000171735.14 protein_coding CAMTA1
1	7112330	1	GACACGAAACACCACAACAC	-13	3'-5'	1|0	76.0704	transcript for ENSG00000171735.14 protein_coding CAMTA1
1	7125714	1	AGCTGACATGGACTCCAACA	-1	3'-5'	1|0	79.7911	transcript for ENSG00000171735.14 protein_coding CAMTA1
1	7215447	2	CACCGTTGGGGGGGGGGATT	-6	5'-3'	1|0	78.7165	transcript for ENSG00000171735.14 protein_coding CAMTA1
1	7317136	2	ACCATCGCATGGCGGGGGGC	-12	5'-3'	1|0	84.4915	transcript for ENSG00000171735.14 protein_coding CAMTA1
1	7388421	2	CTACAGGAGCATACCACTAC	-9	3'-5'	1|0	93.4579	transcript for ENSG00000171735.14 protein_coding CAMTA1
1	7721287	1	AAGCCAGAGTCTTACCCCCC	-13	5'-3'	1|0	80.1243	transcript for ENSG00000171735.14 protein_coding CAMTA1
1	7721287	1	AGAGTCTTACCCCCCAGGGT	-8	5'-3'	1|0	82.7323	transcript for ENSG00000171735.14 protein_coding CAMTA1
1	7721287	1	AGCCAGAGTCTTACCCCCCA	-12	5'-3'	1|0	80.2449	transcript for ENSG00000171735.14 protein_coding CAMTA1
1	7721287	2	GGAAGCCAGAGTCTTACCCC	-15	5'-3'	1|0	81.3665	transcript for ENSG00000171735.14 protein_coding CAMTA1
1	7740871	2	AAAGGCCGGCGGGGGGGCGT	-8	5'-3'	1|0	75.9659	transcript for ENSG00000171735.14 protein_coding CAMTA1
1	7758710	2	ATCACAATGGTTGGCTGACT	-1	3'-5'	1|0	79.4734	transcript for ENSG00000171735.14 protein_coding CAMTA1
1	7762140	2	CTCGGCTGGGCTCGTTCTTC	-1	3'-5'	1|0	86.8293	transcript for ENSG00000171735.14 protein_coding CAMTA1
1	7782533	1	CTCTTCCAAACAATGGCCCA	-8	3'-5'	1|0	75.3623	transcript for ENSG00000171735.14 protein_coding CAMTA1
1	7919449	1	ATAACCCCTGAGGGGGTCAC	-10	5'-3'	1|0	80.5883
1	8046502	1	CTGCTGCTGGGAATACGCCA	-16	5'-3'	0|1	88.4066
1	8047510	2	GATCTCACTCTAGTCGGTGC	-14	5'-3'	0|1	92.3416
1	8047511	2	CAGGATCTCACTCTAGTCTC	-18	5'-3'	0|1	77.8301
1	8153985	2	GTGTTACAGGGGGGGCCATC	-7	5'-3'	0|1	87.9568	transcript for ENSG00000238290.1 lincRNA RP11-431K24.1
1	8189273	2	AAGAATGTAAGATGTGCCGC	0	3'-5'	1|0	86.1448
1	8246271	2	GTCACCCGGTCAGAGTGCAG	-15	3'-5'	1|0	77.8048
1	8277315	1	CGGCCGCTTCCTGTCGCCCC	-2	3'-5'	1|0	80.2397
1	8277315	1	CGTCCCGGGGCGACAGGAAG	-5	5'-3'	1|0	77.7813
1	8277315	2	GGCGGCCGCTTCCTGTCGCC	-1	3'-5'	1|0	75.8416
1	8353065	2	ATCCTGGACTTAATCCTAAT	-11	5'-3'	0|1	81.5235
1	8353065	2	GCCCAATTAGGATTAAGTCC	-9	3'-5'	0|1	86.941
1	8432648	1	ATCGAAAGGGGGTGCGCATA	-3	3'-5'	1|0	93.2052	transcript for ENSG00000142599.13 protein_coding RERE
1	8432648	1	GCGCATACGGTTATTTACAA	-16	3'-5'	1|0	96.3851	transcript for ENSG00000142599.13 protein_coding RERE
1	8432648	2	AATCGAAAGGGGGTGCGCAA	-3	3'-5'	1|0	92.2626	transcript for ENSG00000142599.13 protein_coding RERE
1	8542279	2	AGGCCACTTACAATCCAATT	-13	3'-5'	0|1	81.8608	transcript for ENSG00000142599.13 protein_coding RERE
1	8755036	1	AGCATTCCCCCCCCCCCCTT	-8	3'-5'	1|0	75.7636	transcript for ENSG00000142599.13 protein_coding RERE
1	8860586	1	CAAATGATACTGTAGGAGCC	-7	5'-3'	1|0	80.4337	transcript for ENSG00000142599.13 protein_coding RERE
1	8909434	1	CTGTACCGGGGGGGGTTGGA	-7	3'-5'	0|1	78.7811
1	8917398	2	AGGTGGTGATATAACCAGGC	-9	3'-5'	0|1	79.4688
1	8917398	2	GGTGGTGATATAACCAGGCA	-10	3'-5'	0|1	77.27
1	9307896	1	GACAGCTAAGGTCCCTTAGC	-16	5'-3'	1|0	77.1896	transcript for ENSG00000049239.8 protein_coding H6PD
1	9307896	2	GAGGACAGCTAAGGTCCCTT	-19	5'-3'	1|0	86.2329	transcript for ENSG00000049239.8 protein_coding H6PD
1	9365577	1	AGGTAAGACCGGTGGCGTAG	0	5'-3'	1|0	93.8151	transcript for ENSG00000171621.9 protein_coding SPSB1
1	9365577	1	GAAGGAGTAGGTAAGACCGG	-8	5'-3'	1|0	96.0858	transcript for ENSG00000171621.9 protein_coding SPSB1
1	9365577	2	AGGAGTAACGGTAAGACCGG	-6	5'-3'	1|0	82.79	transcript for ENSG00000171621.9 protein_coding SPSB1
1	9400060	2	CGACAGCCCTTGAACCACCT	-8	5'-3'	1|0	88.3938	transcript for ENSG00000171621.9 protein_coding SPSB1
1	9400060	2	GGTTCAAGGGCTGTCGGTGG	-15	3'-5'	1|0	80.425	transcript for ENSG00000171621.9 protein_coding SPSB1
1	9417912	1	CTCTGAGAGAGGGCCGTACA	-17	3'-5'	1|0	85.2122	transcript for ENSG00000171621.9 protein_coding SPSB1
1	9417912	2	AACTCAGAGAGGGCCGTACA	-17	3'-5'	1|0	85.9579	transcript for ENSG00000171621.9 protein_coding SPSB1
1	9481775	1	GTGGGGGAGTATTTACACCA	-8	5'-3'	1|0	84.8877
1	9485124	2	GATTCTTATAATGCCCCTAT	-4	3'-5'	0|1	83.5368
1	9491219	1	CTATATAGTACCAGCTATCC	0	5'-3'	1|0	85.6081
1	9491219	1	CTGGATAGCTGGTACTATAT	-1	3'-5'	1|0	85.8857
1	9491219	2	ACCTATAGTACCAGCTATCC	-2	5'-3'	1|0	81.9689
1	9526002	1	ACATCCCACCATCGGCCAGG	-7	3'-5'	1|0	75.6302
1	9526002	1	CACCCCTCCTGGCCGATGGT	-11	5'-3'	1|0	77.7894
1	9526002	1	CATCCCACCATCGGCCAGGA	-8	3'-5'	1|0	81.0543
1	9526002	1	GCACCCCTCCTGGCCGATGG	-12	5'-3'	1|0	88.7136
1	9526002	2	ACATCCCACCATCGCCAGGA	-8	3'-5'	1|0	80.8125
1	9526002	2	CACATCCCACCATCGCCAGG	-7	3'-5'	1|0	87.3683
1	9526002	2	CTGCACATCCCACCATCGCC	-4	3'-5'	1|0	76.6761
1	9526002	2	GCACCCCTCCTGGCGATGGT	-12	5'-3'	1|0	84.511
1	9526505	1	AGGAAGGGGGTTTCGCCATG	-1	3'-5'	1|0	82.1971
1	9526505	1	GGGGGTTTCGCCATGTGGTC	-6	3'-5'	1|0	86.5526
1	9526505	2	GGAAGGGGGTTTCGCCATGT	-1	3'-5'	1|0	88.0964
1	9652699	1	CTGGAGTGGTGTCATCATTA	15	5'-3'	0|1	77.5366	transcript for ENSG00000188807.8 protein_coding TMEM201
1	9708743	1	ATATACTAGTGTGCATTCCT	1	5'-3'	0|1	75.3006
1	9708743	1	CACTAGTATATCCTTTCTAG	-11	3'-5'	0|1	76.5782
1	9708743	1	GATATACTAGTGTGCATTCC	0	5'-3'	0|1	83.4324
1	9708743	2	AGGATACTAGTGTGCATTCC	-2	5'-3'	0|1	77.8956
1	9708743	2	GGATACTAGTGTGCATTCCT	-1	5'-3'	0|1	77.2852
1	10599643	2	CTATATATAGACTGGTTCTG	-3	3'-5'	0|1	78.3808	transcript for ENSG00000142655.8 protein_coding PEX14
1	10637246	1	ATAACAGTTCAAGACCAGCC	-4	5'-3'	0|1	76.6616	transcript for ENSG00000142655.8 protein_coding PEX14
1	10643724	2	AAGTCGAGTAAGAGCAATAG	1	5'-3'	1|0	75.7174	transcript for ENSG00000142655.8 protein_coding PEX14
1	10710849	1	GACTTGAGCTCAGACGGCCG	-16	5'-3'	1|0	93.675	transcript for ENSG00000130940.10 protein_coding CASZ1
1	10710849	1	GGACTTGAGCTCAGACGGCC	-17	5'-3'	1|0	76.295	transcript for ENSG00000130940.10 protein_coding CASZ1
1	10710849	1	GGGACTTGAGCTCAGACGGC	-18	5'-3'	1|0	90.3383	transcript for ENSG00000130940.10 protein_coding CASZ1
1	10710849	2	ACTTGAGCTCAGACGGCCCG	-15	5'-3'	1|0	76.295	transcript for ENSG00000130940.10 protein_coding CASZ1
1	10710849	2	GGACTTGAGCTCAGACGGCC	-17	5'-3'	1|0	82.9912	transcript for ENSG00000130940.10 protein_coding CASZ1
1	10757298	1	AAGGGGGGGGCGCATAATCT	-12	3'-5'	1|0	88.6208	transcript for ENSG00000130940.10 protein_coding CASZ1
1	10757298	1	AGGGGGGGGCGCATAATCTG	-13	3'-5'	1|0	91.743	transcript for ENSG00000130940.10 protein_coding CASZ1
1	10757298	1	GAAGGGGGGGGCGCATAATC	-11	3'-5'	1|0	88.4228	transcript for ENSG00000130940.10 protein_coding CASZ1
1	10757298	2	AAGGGGGGGGGCGCATAATC	-11	3'-5'	1|0	94.3333	transcript for ENSG00000130940.10 protein_coding CASZ1
1	10834614	1	CATAGCCCCCCCGATCCAAA	-4	5'-3'	0|1	93.0879	transcript for ENSG00000130940.10 protein_coding CASZ1
1	10834614	1	GGATCGGGGGGGCTATGGAT	-10	3'-5'	0|1	86.5777	transcript for ENSG00000130940.10 protein_coding CASZ1
1	10854531	1	CTCCCCCAAACCTGGATCAC	-12	3'-5'	1|0	77.9294	transcript for ENSG00000130940.10 protein_coding CASZ1
1	10854531	2	CGTGGCCCAGTGATCCAGGT	-18	5'-3'	1|0	84.0967	transcript for ENSG00000130940.10 protein_coding CASZ1
1	10854531	2	GTTGGGGGAGCTCCATACTC	0	5'-3'	1|0	77.3909	transcript for ENSG00000130940.10 protein_coding CASZ1
1	10885673	1	GACTTACACACCCAACTACC	-4	5'-3'	0|1	85.5477
1	10885673	2	ACATGACTTACCCAACTACC	-8	5'-3'	0|1	85.8808
1	10932458	1	AATCACCAGCCATAACTCCA	-10	5'-3'	1|0	75.8076
1	10932458	1	ATCACCAGCCATAACTCCAA	-9	5'-3'	1|0	76.5298
1	10979586	2	AAGTAGAAGTGCTTAAACCC	-16	3'-5'	0|1	78.4691
1	10994433	1	AGACTCCATGAAGCACCCTT	-4	5'-3'	1|0	77.8825
1	10994433	2	GACTGCCATGAAGCACCCTT	-3	5'-3'	1|0	78.3567
1	10999194	1	GAGGGCTTGCGAATGACCGC	-1	5'-3'	1|0	92.6373
1	11494036	1	AGAAGGCCATGCATTGGCCG	-16	5'-3'	0|1	85.749
1	11494036	1	GCCATGCATTGGCCGAGGCC	-11	5'-3'	0|1	80.2356
1	11494036	2	GCCATGCATTGGCGAGGCCA	-11	5'-3'	0|1	79.7535
1	11494036	2	GGCCATGCATTGGCGAGGCC	-12	5'-3'	0|1	80.5475
1	11891496	2	ATAAACCAGCTGGACACGGT	1	3'-5'	0|1	89.8797	transcript for ENSG00000011021.17 protein_coding CLCN6
1	11891496	2	GTGAGCCCACCGTGTCCAGC	-4	5'-3'	0|1	77.4076	transcript for ENSG00000011021.17 protein_coding CLCN6
1	11927124	2	CACTTTGGACCACTTGCGTG	-5	3'-5'	0|1	92.2838
1	11927124	2	GATGGCCTTCCCCACGCAAG	-14	5'-3'	0|1	89.2246
1	11968316	1	AAGCCCTGCTAAGAAACGCA	-9	3'-5'	1|0	89.6746	exon for ENSG00000199347.1 snRNA RNU5E-1
1	11968316	2	AGCCCTGCTAAGTAAACGCA	-9	3'-5'	1|0	79.0975	exon for ENSG00000199347.1 snRNA RNU5E-1
1	12167759	1	GCCAAACCCTGGTTAATCTC	-5	5'-3'	0|1	87.8997	transcript for ENSG00000120949.10 protein_coding TNFRSF8
1	12167759	1	GGGACCCCAGAGATTAACCA	1	3'-5'	0|1	75.8932	transcript for ENSG00000120949.10 protein_coding TNFRSF8
1	12167759	2	GCCAAACCTGGTTAATCTCT	-5	5'-3'	0|1	76.347	transcript for ENSG00000120949.10 protein_coding TNFRSF8
1	12276983	2	GCCAGGCTGGACCCACAATT	-1	3'-5'	1|0	83.2418
1	12626456	1	ATGTGACGCCCAAATCTCAG	-16	3'-5'	0|1	77.0071
1	12626456	1	GAGATTTGGGCGTCACATTC	-11	5'-3'	0|1	81.2317
1	12639197	2	GTCTTGTCTGGCCTTGTTCG	-10	5'-3'	0|1	89.3039	transcript for ENSG00000162496.4 protein_coding DHRS3
1	12662182	2	AAATGACTAATGCCTTGTGC	0	5'-3'	0|1	75.1674	transcript for ENSG00000162496.4 protein_coding DHRS3
1	12662182	2	ATGACTAATGCCTTGTGCAG	2	5'-3'	0|1	75.8485	transcript for ENSG00000162496.4 protein_coding DHRS3
1	12920381	2	CAGTGGGGGTTCAGCTCTAT	-8	5'-3'	1|0	85.1484	transcript for ENSG00000120952.4 protein_coding PRAMEF2
1	12939546	2	CATAACTCTCCCGGGGGGGC	-11	5'-3'	1|0	87.3164	transcript for ENSG00000243073.3 protein_coding PRAMEF4
1	12939546	2	CTGCCCCCCCGGGAGAGTTA	-12	3'-5'	1|0	80.8668	transcript for ENSG00000243073.3 protein_coding PRAMEF4
1	13006448	2	CACGTCCTCTTCCACTCGAA	-13	3'-5'	1|0	89.1444	transcript for ENSG00000232423.3 protein_coding PRAMEF6
1	13033207	2	GCCAGTAGAGGGCGACATGA	-9	5'-3'	1|0	86.3971	transcript for ENSG00000232423.3 protein_coding PRAMEF6
1	13033207	2	GCCTTCATGTCGCCCTCTAC	-8	3'-5'	1|0	88.6641	transcript for ENSG00000232423.3 protein_coding PRAMEF6
1	13039338	2	ACAAAACAGGTCAGGCTCGG	-17	3'-5'	1|0	76.9567	transcript for ENSG00000232423.3 protein_coding PRAMEF6
1	13783607	2	CAGCAATCCCTGACCGCTCA	-4	5'-3'	0|1	87.7038
1	13783607	2	CTGAGCGGTCAGGGATTGCT	-6	3'-5'	0|1	84.3844
1	13783610	1	CTCTATCGCCCTGAGCGGTC	-1	3'-5'	0|1	93.5543
1	13783610	2	CGCCCTGAGCGGTCGGGTGC	-8	3'-5'	0|1	88.0968
1	13783610	2	CTCTATCGCCCTGAGCGGTC	-2	3'-5'	0|1	93.5543
1	13865181	2	CACCTGAGTAGTTCGGGAGT	-10	3'-5'	1|0	93.4622
1	13865181	2	CTCCAACTCCCGAACTACTC	-12	5'-3'	1|0	90.6532
1	13865181	2	GAAGATCACCTGAGTAGTTC	-4	3'-5'	1|0	81.4561
1	13865181	2	GGAAGATCACCTGAGTAGTT	-3	3'-5'	1|0	77.2143
1	14390450	1	ACGAAACCTCTCTCTCGCCC	-15	5'-3'	0|1	85.989
1	14438586	2	AGCTGCGGCAGACCCTCTAC	-3	3'-5'	1|0	82.8625
1	14438586	2	GACTGCCACCCTCCAGTAGA	-15	5'-3'	1|0	76.4501
1	14438586	2	GCGGCAGACCCTCTACTGGA	-7	3'-5'	1|0	85.1012
1	14446418	1	CTTTATGTGTACGATCTATT	-14	5'-3'	0|1	87.928
1	14451204	1	ACCAACATTGCCAGCACTCG	-17	3'-5'	0|1	83.2853
1	14451204	1	CAACATTGCCAGCACTCGAG	-19	3'-5'	0|1	87.8879
1	14463117	2	GTACCAGGGTACTGTGCACC	-10	3'-5'	0|1	81.6101
1	14610940	1	GGTGAGCCCCGGGTTCCAAA	-5	5'-3'	0|1	83.2717
1	14819495	1	ACGTCTAGGGAAGAATGTCC	5	3'-5'	1|0	81.6949
1	14829793	1	GAGAGCATCCTGGCTAACAA	-17	5'-3'	1|0	81.6306
1	14929892	2	CTAACCTGGTAGGCTGTCAT	-4	5'-3'	1|0	82.7956	transcript for ENSG00000189337.11 protein_coding KAZN
1	14929892	2	CTGGTAGGCTGTCATGGGAT	1	5'-3'	1|0	76.371	transcript for ENSG00000189337.11 protein_coding KAZN
1	15002919	2	GGCTCAGGGACGACGTGAAG	-7	3'-5'	1|0	84.1453	transcript for ENSG00000189337.11 protein_coding KAZN
1	15193591	1	GAAAAAACGAGCCCGAACTT	-15	3'-5'	1|0	92.2465	transcript for ENSG00000189337.11 protein_coding KAZN
1	15193591	1	GGAAAAAACGAGCCCGAACT	-14	3'-5'	1|0	92.1477	transcript for ENSG00000189337.11 protein_coding KAZN
1	15194449	2	ACACGAGCATTGCATAGGCA	26	5'-3'	1|0	83.304	transcript for ENSG00000189337.11 protein_coding KAZN
1	15194449	2	AGCATATGCGGGCATTGCAT	52	5'-3'	1|0	87.4279	transcript for ENSG00000189337.11 protein_coding KAZN
1	15194449	2	AGGCACGGCACAGCATATGC	41	5'-3'	1|0	88.92	transcript for ENSG00000189337.11 protein_coding KAZN
1	15194449	2	CACATACACGAGCATTGCAT	21	5'-3'	1|0	84.5738	transcript for ENSG00000189337.11 protein_coding KAZN
1	15194556	1	ACGCACAGCATTGCATACAC	-6	5'-3'	1|0	93.3954	transcript for ENSG00000189337.11 protein_coding KAZN
1	15194556	2	ACGCACAGCATCGCATACGC	-6	5'-3'	1|0	79.5455	transcript for ENSG00000189337.11 protein_coding KAZN
1	15317934	1	CTACAAGCCACCCAGCATAC	-15	5'-3'	1|0	81.3398	transcript for ENSG00000189337.11 protein_coding KAZN
1	15317934	2	GCTACAAGCCACCCAGCTAC	-16	5'-3'	1|0	81.5039	transcript for ENSG00000189337.11 protein_coding KAZN
1	15365723	1	ACCTGTTAAATGGGGGGAAT	-5	3'-5'	0|1	76.4189	transcript for ENSG00000189337.11 protein_coding KAZN
1	15439233	1	ACAGTGCACAAAGCCCCCGC	-12	5'-3'	0|1	76.9904	transcript for ENSG00000189337.11 protein_coding KAZN
1	15439233	1	CAGTGCACAAAGCCCCCGCA	-11	5'-3'	0|1	78.6577	transcript for ENSG00000189337.11 protein_coding KAZN
1	15439233	2	AGTGCACAAAGCCCCCCGCA	-10	5'-3'	0|1	81.6214	transcript for ENSG00000189337.11 protein_coding KAZN
1	15439233	2	CAGTGCACAAAGCCCCCCGC	-11	5'-3'	0|1	78.2038	transcript for ENSG00000189337.11 protein_coding KAZN
1	15484645	2	ATAATGTAGTGACTTCACGC	-6	5'-3'	0|1	91.527	transcript for ENSG00000171729.9 protein_coding TMEM51
1	15538317	2	GTCTGAAAGGTGACCCCCCC	-12	5'-3'	0|1	86.7925	transcript for ENSG00000171729.9 protein_coding TMEM51
1	15538977	1	ACGTACAAGGCCTGCCTGTC	7	5'-3'	0|1	81.0476	transcript for ENSG00000171729.9 protein_coding TMEM51
1	15538977	1	GACAGGCAGGCCTTGTACGT	4	3'-5'	0|1	90.8466	transcript for ENSG00000171729.9 protein_coding TMEM51
1	15538977	2	AACCACACTCTCAGCGTACA	-13	5'-3'	0|1	88.62	transcript for ENSG00000171729.9 protein_coding TMEM51
1	15708238	1	GCTGTCAATGCTACACAACT	-14	3'-5'	0|1	79.9911	transcript for ENSG00000142621.15 protein_coding FHAD1
1	15745344	1	ATAGGTGACAAGGGTGTCGC	4	3'-5'	0|1	91.8521	transcript for ENSG00000142634.8 protein_coding EFHD2
1	15814475	1	GAGTTTACATTTACAAGACG	-3	3'-5'	1|0	80.8359	transcript for ENSG00000215704.5 protein_coding CELA2B
1	15846477	2	GTCACCCGGCTGAAGTGCAG	-15	3'-5'	1|0	75.868	transcript for ENSG00000132906.13 protein_coding CASP9
1	15850553	1	AGGACATCCAGGTGCGCCCC	-1	3'-5'	1|0	76.3309	transcript for ENSG00000132906.13 protein_coding CASP9
1	15850973	1	ACGCGGAGCGTGTTCTGGGG	-16	3'-5'	1|0	82.3598	transcript for ENSG00000132906.13 protein_coding CASP9
1	15850973	1	CGGTGACGCGGAGCGTGTTC	-11	3'-5'	1|0	96.2457	transcript for ENSG00000132906.13 protein_coding CASP9
1	15850973	1	GTGACGCGGAGCGTGTTCTG	-13	3'-5'	1|0	93.6764	transcript for ENSG00000132906.13 protein_coding CASP9
1	15850973	2	GACGCGAGCGTGTTCTGGGG	-16	3'-5'	1|0	79.12	transcript for ENSG00000132906.13 protein_coding CASP9
1	15850973	2	GCGGTGACGCGAGCGTGTTC	-11	3'-5'	1|0	95.4866	transcript for ENSG00000132906.13 protein_coding CASP9
1	15850973	2	GGTGACGCGAGCGTGTTCTG	-13	3'-5'	1|0	90.4264	transcript for ENSG00000132906.13 protein_coding CASP9
1	15909624	1	GGTTTACTTATCCTGTACTC	-2	3'-5'	1|0	82.1976	transcript for ENSG00000116138.8 protein_coding DNAJC16
1	15909624	1	GTACTCAAGCCCCTGAGTAC	-13	5'-3'	1|0	78.0302	transcript for ENSG00000116138.8 protein_coding DNAJC16
1	15909624	2	GCACTCAGGGTTTACTTATC	-2	3'-5'	1|0	82.3424	transcript for ENSG00000116138.8 protein_coding DNAJC16
1	16124747	1	GAGGAATCCATAAACACGCA	-16	5'-3'	1|0	77.3269
1	16124747	1	GAGGAATCCTTGCGTGTTTA	-9	3'-5'	1|0	84.7196
1	16126381	2	CGGTAGAACCCCAAGCCGGT	31	5'-3'	2|1	94.888
1	16126381	2	GGTAGAACCCCAAGCCGGTA	32	5'-3'	2|1	95.1696
1	16139607	1	ATGGAGTGGGCGCACCTCCT	-6	5'-3'	0|1	79.6331
1	16139607	2	ATGGAGTGGCGCACCTCCTC	-6	5'-3'	0|1	84.4578
1	16175104	1	CGCTCGGCAATGTCTGACTT	-17	5'-3'	0|1	81.0888	transcript for ENSG00000065526.6 protein_coding SPEN
1	16175104	1	GCTCGGCAATGTCTGACTTC	-16	5'-3'	0|1	76.7458	transcript for ENSG00000065526.6 protein_coding SPEN
1	16175104	2	GCGCTCGGCAATGTCTGACT	-18	5'-3'	0|1	93.5492	transcript for ENSG00000065526.6 protein_coding SPEN
1	16366658	2	AGAGCATGACCCCGACCTCA	3	3'-5'	0|1	84.4507
1	16366658	2	CTCTCATGCCCGTGAGGTCG	-6	5'-3'	0|1	87.3773
1	16366658	2	GAGCATGACCCCGACCTCAC	2	3'-5'	0|1	82.0745
1	16366658	2	GTGAGGTCGGGGTCATGCTC	5	5'-3'	0|1	80.3937
1	16388852	2	AGTGGGTGGGGTTGTCCCGT	-11	3'-5'	0|1	86.0503	transcript for ENSG00000185519.8 protein_coding FAM131C
1	16411310	1	GGGGGGGGGTTTCACCACAT	-13	3'-5'	1|0	83.9068
1	16426576	2	GGAAGTCATCTATATGAAGC	-9	5'-3'	1|0	76.2164
1	16515903	2	AATCTGGGGGAGACAAACGC	-4	5'-3'	1|0	82.5531
1	16515903	2	ATCTGGGGGAGACAAACGCC	-3	5'-3'	1|0	85.4231
1	16523709	2	GTTTCACTATGTTGGCTAGC	-3	3'-5'	0|1	88.5936
1	16526193	1	CTCCCGTTTAAAGCCCTCCA	-4	5'-3'	0|1	77.0476	transcript for ENSG00000142632.12 protein_coding ARHGEF19
1	16526193	1	GCTCCCGTTTAAAGCCCTCC	-5	5'-3'	0|1	84.5476	transcript for ENSG00000142632.12 protein_coding ARHGEF19
1	16528469	2	CATGGGTCCCTAGGGTACCT	-5	3'-5'	0|1	80.1185	transcript for ENSG00000142632.12 protein_coding ARHGEF19
1	16528823	1	AGGCACCCCGTCCCCATGAT	17	3'-5'	0|1	78.924	transcript for ENSG00000142632.12 protein_coding ARHGEF19
1	16528823	1	GGGACGGGGTGCCCATCATG	6	5'-3'	0|1	78.0839	transcript for ENSG00000142632.12 protein_coding ARHGEF19
1	16528823	1	GGGTGCCCATCATGGGGACG	12	5'-3'	0|1	76.4274	transcript for ENSG00000142632.12 protein_coding ARHGEF19
1	16528823	1	GTCCCAGGGGTGCCCGCCAT	-15	5'-3'	0|1	78.1026	transcript for ENSG00000142632.12 protein_coding ARHGEF19
1	16537781	1	AGAGAAAGAGACCCGTCTGT	-15	3'-5'	1|0	83.6054	transcript for ENSG00000142632.12 protein_coding ARHGEF19
1	16537781	1	CAGAGAAAGAGACCCGTCTG	-14	3'-5'	1|0	79.7353	transcript for ENSG00000142632.12 protein_coding ARHGEF19
1	16537781	2	GCAGAGAGAGACCCGTCTGT	-15	3'-5'	1|0	84.794	transcript for ENSG00000142632.12 protein_coding ARHGEF19
1	16538093	2	GTCCCTAGCGGGAAGAAGTC	-8	5'-3'	1|0	82.0885	transcript for ENSG00000142632.12 protein_coding ARHGEF19
1	16672896	1	AAGAAGAGAGCGAGGCGTAG	-2	5'-3'	2|1	78.3159	transcript for ENSG00000037637.6 protein_coding FBXO42
1	16672896	2	AACAAGAGAGCGAGGCGTAG	-2	5'-3'	2|1	85.8645	transcript for ENSG00000037637.6 protein_coding FBXO42
1	16906538	2	AAAAAAGATCTCTCTGACCG	-12	3'-5'	1|0	75.0027	transcript for ENSG00000219481.6 protein_coding NBPF1
1	16906538	2	AAAAAGATCTCTCTGACCGG	-13	3'-5'	1|0	82.7868	transcript for ENSG00000219481.6 protein_coding NBPF1
1	16906538	2	ATCTCTCTGACCGGGGGTGC	-19	3'-5'	1|0	87.865	transcript for ENSG00000219481.6 protein_coding NBPF1
1	17013916	2	CGTGTTTGCATTGTGACAGC	-1	5'-3'	0|1	76.0596	transcript for ENSG00000268869.1 pseudogene ESPNP
1	17019432	1	GCCAGTACACGCCGTGCGCC	-14	5'-3'	1|0	95.7294	transcript for ENSG00000268869.1 pseudogene ESPNP
1	17019432	1	GCCTGGCGCACGGCGTGTAC	-13	3'-5'	1|0	96.8316	transcript for ENSG00000268869.1 pseudogene ESPNP
1	17019432	2	CAGTACACGCCGTGCGCGCC	-12	5'-3'	1|0	91.0115	transcript for ENSG00000268869.1 pseudogene ESPNP
1	17019432	2	CTGGCGCGCACGGCGTGTAC	-13	3'-5'	1|0	97.5717	transcript for ENSG00000268869.1 pseudogene ESPNP
1	17019525	2	AGCTGCCCAGCCGTTCGTTG	-6	5'-3'	0|1	92.3399	transcript for ENSG00000268869.1 pseudogene ESPNP
1	17019525	2	CAGCTGCCCAGCCGTTCGTT	-7	5'-3'	0|1	93.8403	transcript for ENSG00000268869.1 pseudogene ESPNP
1	17019525	2	GCAGCTGCCCAGCCGTTCGT	-8	5'-3'	0|1	94.1907	transcript for ENSG00000268869.1 pseudogene ESPNP
1	17019646	1	AGGCGCGCCTGGTCCGCGGA	-5	5'-3'	0|1	83.4998	transcript for ENSG00000268869.1 pseudogene ESPNP
1	17019646	1	GCCTAGGCGCGCCTGGTCCG	-9	5'-3'	0|1	84.5885	transcript for ENSG00000268869.1 pseudogene ESPNP
1	17019646	2	CAGTCTGCCTAGGCGCGCCT	-15	5'-3'	0|1	94.2552	transcript for ENSG00000268869.1 pseudogene ESPNP
1	17025552	2	GTTTCTGGATGAGCTGGTAC	-14	3'-5'	0|1	76.3111	transcript for ENSG00000268869.1 pseudogene ESPNP
1	17027202	1	CGAACCCCCCCCAGCCGTCG	-3	5'-3'	1|0	77.8243	transcript for ENSG00000268869.1 pseudogene ESPNP
1	17027202	2	AACCCCCCCCCCAGCCGTCG	-1	5'-3'	1|0	79.9222	transcript for ENSG00000268869.1 pseudogene ESPNP
1	17027202	2	ATCCGCGACGGCTGGGGGGG	1	3'-5'	1|0	86.8736	transcript for ENSG00000268869.1 pseudogene ESPNP
1	17218424	1	ATAATGGCAGTTAGTGAGCG	-16	5'-3'	1|0	83.1511	transcript for ENSG00000058453.12 protein_coding CROCC
1	17222653	2	CAAAAGTAGACTGTACGCTA	0	5'-3'	1|0	91.0314	transcript for ENSG00000058453.12 protein_coding CROCC
1	17231894	2	GCGTTACCAAGGATCCGCTA	1	3'-5'	1|0	95.6886	transcript for ENSG00000058453.12 protein_coding CROCC
1	17315836	1	GGTCATCCCAGCTACTCAAG	-10	3'-5'	1|0	81.7851	transcript for ENSG00000226526.1 antisense RP1-37C10.3
1	17539677	2	GGGGACGTAATTCTCCTACC	-9	5'-3'	0|1	89.4254	transcript for ENSG00000142623.8 protein_coding PADI1
1	17539679	2	CTGTGAAGTGGGGACGTAAT	-20	5'-3'	0|1	90.0565	transcript for ENSG00000142623.8 protein_coding PADI1
1	17539679	2	GACGTAATCGGAGTCCTACC	-8	5'-3'	0|1	96.149	transcript for ENSG00000142623.8 protein_coding PADI1
1	17539683	2	ACGTAATCTCCTCACCAGGC	-11	5'-3'	0|1	75.6225	transcript for ENSG00000142623.8 protein_coding PADI1
1	17539683	2	GGGGACGTAATCTCCTCACC	-15	5'-3'	0|1	86.4052	transcript for ENSG00000142623.8 protein_coding PADI1
1	17583037	1	GGGGTGCTTCAGTCTTCACT	-21	5'-3'	1|0	78.9193	transcript for ENSG00000142619.4 protein_coding PADI3
1	17614489	1	GGTACAGAGGTCACGTGTCT	-20	3'-5'	1|0	87.7917
1	17614489	2	CTTACAGAGGTCACGTGTCT	-20	3'-5'	1|0	85.3363
1	17614492	2	AACCACTGGTGTGACTTCCC	-2	3'-5'	1|0	75.5497
1	17614492	2	AGACACGTGACCTCTGTACC	-20	5'-3'	1|0	76.3395
1	17614492	2	GACACGTGACCTCTGTACCC	-19	5'-3'	1|0	77.1317
1	17614492	2	GTGTGACTTCCCGGGTACAG	-10	3'-5'	1|0	85.4368
1	17624908	1	AAGCTCCAGTTTCCCGGCTT	2	5'-3'	1|0	83.1411
1	17624908	2	GCGCTCCAGTTTCCCGGCTT	-1	5'-3'	1|0	84.4315
1	17649829	2	ACCAACGGAAGTAAAAGTGC	-16	3'-5'	0|1	75.7941	transcript for ENSG00000159339.9 protein_coding PADI4
1	17699379	1	GCCCGTCGGAGAGCAAACAC	-15	5'-3'	0|1	87.5859	transcript for ENSG00000256049.2 processed_transcript PADI6
1	17699379	2	CTGTGTGTTTGCTCTCCGAC	-14	3'-5'	0|1	83.5778	transcript for ENSG00000256049.2 processed_transcript PADI6
1	17940728	1	AAAGGTCTCGTAACTGTAAA	-9	3'-5'	1|0	75.1996	transcript for ENSG00000074964.12 protein_coding ARHGEF10L
1	17940728	1	GAAAGGTCTCGTAACTGTAA	-8	3'-5'	1|0	84.8262	transcript for ENSG00000074964.12 protein_coding ARHGEF10L
1	18010111	2	CGGCATGTCTCAGCTACCTC	-21	3'-5'	1|0	80.301	transcript for ENSG00000074964.12 protein_coding ARHGEF10L
1	18010111	2	GTAGCTGAGACATGCCGGGC	-15	5'-3'	1|0	84.2666	transcript for ENSG00000074964.12 protein_coding ARHGEF10L
1	18023997	2	GCTCTGGCCCAAGTAGTTTC	-15	3'-5'	0|1	82.0109	exon for ENSG00000074964.12 protein_coding ARHGEF10L
1	18028036	1	GCCCATGAACTGATAAACTC	-13	3'-5'	0|1	78.4866
1	18028036	2	GCCCAGAGTTTATCAGTCAT	-15	5'-3'	0|1	78.3354
1	18028036	2	GCCCATGACTGATAAACTCT	-14	3'-5'	0|1	78.9458
1	18028036	2	GGCCCAGAGTTTATCAGTCA	-16	5'-3'	0|1	77.8361
1	18028036	2	GGCCCATGACTGATAAACTC	-13	3'-5'	0|1	77.086
1	18117927	1	ACTCCCTAATTGTGTGGCCC	-16	3'-5'	1|0	78.1022	transcript for ENSG00000117148.6 protein_coding ACTL8
1	18117927	2	ATCTTCCACTCCTAATTGTG	-10	3'-5'	1|0	75.4047	transcript for ENSG00000117148.6 protein_coding ACTL8
1	18117927	2	CACTCCTAATTGTGTGGCCC	-16	3'-5'	1|0	78.0408	transcript for ENSG00000117148.6 protein_coding ACTL8
1	18117927	2	CAGGGCCACACAATTAGGAG	-15	5'-3'	1|0	78.1133	transcript for ENSG00000117148.6 protein_coding ACTL8
1	18275847	1	GGAAAAACCCCACCAGTGTC	-7	3'-5'	0|1	76.2881
1	18275847	2	GAGTTTCCAGACACTTGGTG	-13	5'-3'	0|1	75.6347
1	18284270	2	CAATAGAGGAACTGTCCCAA	-4	3'-5'	0|1	77.0403
1	18321917	2	CTTTGATTTAAGTTACCCCC	-5	5'-3'	1|0	83.4114
1	18563224	1	CGGTGAGGAGTGGAGTGTCC	-6	5'-3'	1|0	75.0531	transcript for ENSG00000117154.7 protein_coding IGSF21
1	18608670	1	ATACACAGTCCGGAACCCCC	-12	3'-5'	0|1	89.0887	transcript for ENSG00000117154.7 protein_coding IGSF21
1	18687463	1	ACACCGTGGGGCATCGCAAG	-11	3'-5'	1|0	92.3699	transcript for ENSG00000117154.7 protein_coding IGSF21
1	18687463	1	AGACACCGTGGGGCATCGCA	-9	3'-5'	1|0	86.9522	transcript for ENSG00000117154.7 protein_coding IGSF21
1	18687463	1	GACACCGTGGGGCATCGCAA	-10	3'-5'	1|0	88.8058	transcript for ENSG00000117154.7 protein_coding IGSF21
1	18687463	2	CACCGTGGGGGCATCGCAAG	-11	3'-5'	1|0	94.8656	transcript for ENSG00000117154.7 protein_coding IGSF21
1	18687463	2	GACACCGTGGGGGCATCGCA	-9	3'-5'	1|0	86.4309	transcript for ENSG00000117154.7 protein_coding IGSF21
1	18687463	2	GCGATGCCCCCACGGTGTCT	-5	5'-3'	1|0	95.7359	transcript for ENSG00000117154.7 protein_coding IGSF21
1	18741257	1	AGCATTTGGCCCCCCATTTA	-8	5'-3'	1|0	79.9137
1	18741257	1	ATTTGGCCCCCCATTTAGGG	-5	5'-3'	1|0	85.0287
1	18741257	1	GGCCCCCCATTTAGGGTGGA	-1	5'-3'	1|0	80.9997
1	18741257	2	AGCATTTGGCCCCCCCATTT	-8	5'-3'	1|0	85.1586
1	18741257	2	GCATTTGGCCCCCCCATTTA	-7	5'-3'	1|0	83.7123
1	18741257	2	GCCCCCCCATTTAGGGTGGA	0	5'-3'	1|0	80.8632
1	18765474	1	ATGCTGGATGAACTACATGA	1	5'-3'	1|0	77.1174
1	18765474	1	CATGCTGGATGAACTACATG	0	5'-3'	1|0	75.4881
1	18765474	2	GGCTGTACCCTCATGTGGGT	-6	3'-5'	1|0	75.7765
1	18816284	2	CTGGCTGTGACTAGGGTAAC	-14	3'-5'	0|1	75.1904
1	18968447	1	GGGGGGGGGGAGGTTAATCC	-12	3'-5'	1|0	75.5472	transcript for ENSG00000009709.7 protein_coding PAX7
1	19020268	1	GTGGGAACGAGAAAGCGCCC	-4	3'-5'	0|1	80.5749	transcript for ENSG00000009709.7 protein_coding PAX7
1	19020268	2	GCGCGCCCAGGAATGTGCCC	-16	3'-5'	0|1	76.0025	transcript for ENSG00000009709.7 protein_coding PAX7
1	19020268	2	GGGAACGAGAAAGCGCGCCC	-4	3'-5'	0|1	92.2986	transcript for ENSG00000009709.7 protein_coding PAX7
1	19053779	1	GTTCATGCAACTTGTGCACA	-12	3'-5'	0|1	76.1672	transcript for ENSG00000009709.7 protein_coding PAX7
1	19099783	2	ATCCTGCCTTTGTAACAGAC	6	3'-5'	1|0	75.2944
1	19099783	2	GCCCTGTCTGTTACAAAGGC	4	5'-3'	1|0	81.1501
1	19111072	2	AGCGTGGCCGTGGCCGCGGT	-3	5'-3'	1|0	76.9081
1	19156042	1	CAGGGGGGGCTCCCGATGTG	-20	3'-5'	1|0	87.0566
1	19156042	2	AGTTAAGTCCTCTCACAGCG	-3	3'-5'	1|0	83.0751
1	19156042	2	GCGGGGGGGCTCCCGATGTG	-20	3'-5'	1|0	87.7813
1	19156042	2	GTTAAGTCCTCTCACAGCGG	-4	3'-5'	1|0	83.7618
1	19163435	1	GCAGCCCCTATATGGTTCCA	-9	3'-5'	1|0	81.79
1	19163435	1	GGCAGCCCCTATATGGTTCC	-8	3'-5'	1|0	81.9651
1	19191686	1	GCCCCTCCTAGATAAACGTC	-6	3'-5'	1|0	78.3068	transcript for ENSG00000255275.3 protein_coding RP13-279N23.2
1	19191686	1	GCCCTGACGTTTATCTAGGA	-8	5'-3'	1|0	89.6543	transcript for ENSG00000255275.3 protein_coding RP13-279N23.2
1	19191686	2	CGTTATCTAGGAGGGGCAAG	-1	5'-3'	1|0	88.7625	transcript for ENSG00000255275.3 protein_coding RP13-279N23.2
1	19191686	2	CTCAGGCCCTGACGTTATCT	-13	5'-3'	1|0	86.3045	transcript for ENSG00000255275.3 protein_coding RP13-279N23.2
1	19191686	2	GCCCTGACGTTATCTAGGAG	-8	5'-3'	1|0	91.648	transcript for ENSG00000255275.3 protein_coding RP13-279N23.2
1	19191686	2	GGCCCTGACGTTATCTAGGA	-9	5'-3'	1|0	83.9566	transcript for ENSG00000255275.3 protein_coding RP13-279N23.2
1	19798061	1	CGAGAAATGCTTCCTCGGCT	0	5'-3'	1|0	88.3891	transcript for ENSG00000077549.13 protein_coding CAPZB
1	19986283	2	ACAGCTTTGCAGACGCCTCT	-20	3'-5'	1|0	80.8763
1	20007973	2	ACGGAGTCTTGTCTTGTACC	-5	3'-5'	1|0	88.7134
1	20214209	2	ACGTCCCCCGAGCCTTCTTT	-8	5'-3'	0|1	84.683	transcript for ENSG00000169914.5 protein_coding OTUD3
1	20554964	1	AGTGCAACGGCCGCAGGAGT	-7	5'-3'	0|1	81.4774
1	20554964	2	GGAGTGCAACGCCGCAGGAG	-9	5'-3'	0|1	82.7851
1	20822128	1	AAGGTGAATCGATCTTAGCA	-1	5'-3'	1|0	87.1718
1	20822128	2	AGGGTGAATCGATCTTAGCA	0	5'-3'	1|0	84.5973
1	20825400	1	GGTTTAAATTCAGTCAGACC	-8	5'-3'	1|0	76.0297
1	20848720	1	AGTCCACAGATTGATTGATC	-7	5'-3'	2|1	84.1457
1	20902319	1	CGGCAAGTCCCTCAGCATGG	0	5'-3'	1|0	76.9241
1	20913605	1	GAGTCCTGAAGGCCGGTCCC	9	5'-3'	1|0	76.8318
1	20972373	1	GCAATCTCTCCCTTAGAACG	-18	5'-3'	1|0	85.8727	transcript for ENSG00000158828.5 protein_coding PINK1
1	20984485	1	GTAGGGTGTTTAACAGCACC	-1	3'-5'	1|0	76.9147	transcript for ENSG00000244038.5 protein_coding DDOST
1	21016285	1	AAAACACAGCAATTCGGGGC	-2	5'-3'	1|0	90.2667	transcript for ENSG00000117245.8 protein_coding KIF17
1	21016285	2	GACCGGAAAACAGCAATTCG	-8	5'-3'	1|0	84.0555	transcript for ENSG00000117245.8 protein_coding KIF17
1	21016285	2	GGAAAACAGCAATTCGGGGC	-4	5'-3'	1|0	84.6682	transcript for ENSG00000117245.8 protein_coding KIF17
1	21030777	1	ATCTGGGCCGTCTCCAACCA	-3	5'-3'	0|1	75.9431	transcript for ENSG00000117245.8 protein_coding KIF17
1	21030777	1	CATCTGGGCCGTCTCCAACC	-4	5'-3'	0|1	78.2531	transcript for ENSG00000117245.8 protein_coding KIF17
1	21036591	2	AGACAGCTCTCATAGGATAT	-6	5'-3'	0|1	80.5595	transcript for ENSG00000117245.8 protein_coding KIF17
1	21059410	2	CATCTGCAGGAAACCCCCCC	-12	5'-3'	0|1	75.303	exon for ENSG00000233069.1 antisense RP5-930J4.2
1	21100337	1	GGAGTCACATAAATTAGCAC	-11	5'-3'	0|1	78.7739	transcript for ENSG00000127483.13 protein_coding HP1BP3
1	21471248	2	CATCTTTCAAAAGCCCACGA	-7	5'-3'	1|0	83.453	transcript for ENSG00000075151.15 protein_coding EIF4G3
1	21667435	1	GTGCTTAGGAGGTGGCCCGG	-4	3'-5'	1|0	76.4925	transcript for ENSG00000117298.10 protein_coding ECE1
1	21667435	2	GCTTAGGAGGTGGCCCCGGA	-5	3'-5'	1|0	79.1831	transcript for ENSG00000117298.10 protein_coding ECE1
1	21756829	2	CTCACGCACAAGTGCACAAG	0	3'-5'	1|0	76.3669
1	21829792	2	AAACGAGAACCAGTCAGGCG	-1	5'-3'	1|0	87.0402
1	21884869	1	ACCACCCAGTGGCACCCAAC	-19	5'-3'	0|1	78.8688	transcript for ENSG00000162551.9 protein_coding ALPL
1	21884869	2	AGAGCCTCTTTGGCCAACGT	-4	3'-5'	0|1	85.9833	transcript for ENSG00000162551.9 protein_coding ALPL
1	21884869	2	CACCCAGTGGCACCCAACGT	-17	5'-3'	0|1	88.3101	transcript for ENSG00000162551.9 protein_coding ALPL
1	21884869	2	GAGCCTCTTTGGCCAACGTT	-5	3'-5'	0|1	90.9983	transcript for ENSG00000162551.9 protein_coding ALPL
1	21884869	2	GCACCCAACGTTGGCCAAAG	-8	5'-3'	0|1	81.5321	transcript for ENSG00000162551.9 protein_coding ALPL
1	21893876	2	GGTGTGCGGGCAGACGGACG	-16	3'-5'	0|1	86.4165	transcript for ENSG00000162551.9 protein_coding ALPL
1	21959265	2	CTCAGTGCACCTATAGTCTC	-3	5'-3'	1|0	87.2671	transcript for ENSG00000076864.15 protein_coding RAP1GAP
1	22061876	1	GCGGGAGGACTGTTAAACTC	-13	5'-3'	1|0	85.8063	transcript for ENSG00000090686.11 protein_coding USP48
1	22061876	1	GTTTAACAGTCCTCCCGCCT	-18	3'-5'	1|0	90.9974	transcript for ENSG00000090686.11 protein_coding USP48
1	22061876	2	CGGGAGGACTGTTAAAACTC	-12	5'-3'	1|0	89.6166	transcript for ENSG00000090686.11 protein_coding USP48
1	22131426	2	GTATTTCTAGAGACTACTTC	2	3'-5'	0|1	76.1696
1	22196900	1	CAGAAAGGCCCACACTAATT	0	5'-3'	1|0	95.7794	transcript for ENSG00000142798.12 protein_coding HSPG2
1	22196900	1	CTTTCTGACTACCATGTCCG	-16	3'-5'	1|0	76.5268	transcript for ENSG00000142798.12 protein_coding HSPG2
1	22196900	2	CTTTCGACTACCATGTCCGT	-17	3'-5'	1|0	85.4765	transcript for ENSG00000142798.12 protein_coding HSPG2
1	22221623	1	GGGCCATCCCGTGGCATCCA	-12	3'-5'	0|1	76.5099	transcript for ENSG00000142798.12 protein_coding HSPG2
1	22221623	2	ACCAACTACTGGGCCATCCG	-3	3'-5'	0|1	86.2578	transcript for ENSG00000142798.12 protein_coding HSPG2
1	22221623	2	GCCACGGATGGCCCAGTAGT	-4	5'-3'	0|1	79.0483	transcript for ENSG00000142798.12 protein_coding HSPG2
1	22249534	1	CATTTAACCCACTCAATGCC	-1	5'-3'	0|1	75.0482	transcript for ENSG00000142798.12 protein_coding HSPG2
1	22250286	2	AAACACCAACCGTGGGCTTA	-13	3'-5'	1|0	81.6792	transcript for ENSG00000142798.12 protein_coding HSPG2
1	22274668	1	CTAGAGTGGTGGCTCAATCT	-14	3'-5'	0|1	82.0707
1	22288394	1	GGAGTAAAGGGTAACTGGAT	-4	5'-3'	1|0	75.6368
1	22292449	2	CGCGCCATTGCATCCAGTCT	-10	3'-5'	1|0	89.2494
1	22352395	1	AAAAATAATCCCGGTTGTGG	17	3'-5'	1|0	79.9364	transcript for ENSG00000218510.3 lincRNA LINC00339
1	22352395	1	AAAATAATCCCGGTTGTGGT	16	3'-5'	1|0	87.351	transcript for ENSG00000218510.3 lincRNA LINC00339
1	22352395	1	AAATAATCCCGGTTGTGGTG	15	3'-5'	1|0	84.8037	transcript for ENSG00000218510.3 lincRNA LINC00339
1	22352395	1	ATAATCCCGGTTGTGGTGGG	13	3'-5'	1|0	78.3949	transcript for ENSG00000218510.3 lincRNA LINC00339
1	22360820	1	GCCAGATAACTCTGTTGTAG	-11	5'-3'	1|0	79.7867
1	22360820	1	GGCCAGATAACTCTGTTGTA	-12	5'-3'	1|0	84.627
1	22360820	1	GGGCCAGATAACTCTGTTGT	-13	5'-3'	1|0	81.0867
1	22390816	2	AGTCTCGCTGTCACTCAAGC	-6	5'-3'	1|0	83.5101	transcript for ENSG00000070831.11 protein_coding CDC42
1	22393192	2	GATGATTTCGAGCTGAGATC	-4	5'-3'	1|0	82.019	transcript for ENSG00000070831.11 protein_coding CDC42
1	22430118	1	AGCTAATGGTACTTCCCCGT	-11	5'-3'	1|0	93.8193
1	22430118	1	GAGCTAATGGTACTTCCCCG	-12	5'-3'	1|0	92.0928
1	22430118	1	GCTAATGGTACTTCCCCGTG	-10	5'-3'	1|0	89.6473
1	22552948	1	AGCCTTAGGATCCGAAAGAC	-2	3'-5'	0|1	89.9604
1	22552948	1	CACCTGTCTTTCGGATCCTA	-4	5'-3'	0|1	87.1589
1	22555496	1	GACCCCCCCCTAGACTGAGC	-1	5'-3'	0|1	79.1534
1	22778239	2	ACCTATGCTAGGACGGCGGG	1	3'-5'	1|0	93.4524
1	22778239	2	ATGCTAGGACGGCGGGGGGC	-3	3'-5'	1|0	79.6939
1	22900764	1	GAAAGATGCCTGGCCGGGCG	-4	3'-5'	0|1	76.6318	transcript for ENSG00000070886.6 protein_coding EPHA8
1	22900764	2	AAGATGCCTGGCCGGCGCGG	-7	3'-5'	0|1	86.533	transcript for ENSG00000070886.6 protein_coding EPHA8
1	22900764	2	AGAAAGATGCCTGGCCGGCG	-4	3'-5'	0|1	87.5015	transcript for ENSG00000070886.6 protein_coding EPHA8
1	22901743	2	AACAATAAGGCCAGGTGCGG	-14	3'-5'	0|1	79.3917	transcript for ENSG00000070886.6 protein_coding EPHA8
1	23000534	1	ATGCCTAATGCTGGTCGTCT	-2	5'-3'	0|1	92.7291
1	23150066	1	ACTGTGATGCTCATACAGTT	-19	5'-3'	0|1	80.4141	transcript for ENSG00000133216.12 protein_coding EPHB2
1	23151933	2	CTGGGAAGGAGCCTAGATCG	-18	5'-3'	0|1	85.6355	transcript for ENSG00000133216.12 protein_coding EPHB2
1	23212250	1	GGAGAACGTTTAGGCATAAA	-7	5'-3'	0|1	77.8535	transcript for ENSG00000133216.12 protein_coding EPHB2
1	23212250	2	GCCTAACGTTCTCCATGGCA	-16	3'-5'	0|1	76.84	transcript for ENSG00000133216.12 protein_coding EPHB2
1	23249251	1	CTAGGGGTTAAAGTTAGGCC	-15	5'-3'	0|1	88.3169
1	23249251	2	GCTAGGGGTTAAAGTTAGCC	-16	5'-3'	0|1	83.0004
1	23297998	1	GGGTGGTGGAGCCGTGTTAT	-18	3'-5'	0|1	88.0344
1	23331946	1	ATGTATGCCCAAGGTGGTCG	-3	3'-5'	1|0	84.7165
1	23331946	1	CATGTATGCCCAAGGTGGTC	-2	3'-5'	1|0	81.3847
1	23506978	2	CAGGTGAATCACTCGAAGTC	-4	3'-5'	0|1	90.8386
1	23875441	1	AGGGGACAGGCGGTTCTTCA	0	5'-3'	1|0	80.3093
1	23875441	1	GAGGGGACAGGCGGTTCTTC	-1	5'-3'	1|0	75.6351
1	23875441	2	AGAGGGACAGGCGGTTCTTC	-2	5'-3'	1|0	80.4576
1	23875441	2	GAGGGACAGGCGGTTCTTCA	-1	5'-3'	1|0	78.9908
1	23886338	1	CTGTGGCTCGAACCAGTGTT	-16	3'-5'	1|0	84.9148
1	23886338	2	CTGTGGGCTCGAACCAGTGT	-15	3'-5'	1|0	85.1751
1	23933460	1	GCGGGGGATCGCTTGAATAC	-20	3'-5'	1|0	91.2575	transcript for ENSG00000197880.4 protein_coding MDS2
1	23933460	1	GGCGGGGGATCGCTTGAATA	-19	3'-5'	1|0	95.969	transcript for ENSG00000197880.4 protein_coding MDS2
1	23933460	2	CAGGGGGATCGCTTGAATAC	-20	3'-5'	1|0	92.9128	transcript for ENSG00000197880.4 protein_coding MDS2
1	23980248	2	GCTTCCCCCCATGGTCCTAG	-12	3'-5'	0|1	77.5823
1	24052137	2	GCCTGTCCCAACTACTCGGG	-16	3'-5'	1|0	92.5583
1	24199922	2	AGACAGGGTTTCAACCATAT	-11	5'-3'	1|0	82.0602	transcript for ENSG00000188822.6 protein_coding CNR2
1	24199922	2	GGGTTTCAACCATATTGGTC	-6	5'-3'	1|0	92.8344	transcript for ENSG00000188822.6 protein_coding CNR2
1	24444763	1	GTAGAGAGGGGGTCTCATGT	-6	5'-3'	0|1	75.224
1	24444763	2	AGTAGAGAGGGGTCTCATGT	-7	5'-3'	0|1	77.0999
1	24451624	1	AGTAGGAGTTCAACCACTGC	-17	3'-5'	1|0	80.2985	transcript for ENSG00000142677.3 protein_coding IL22RA1
1	24468502	1	GACCCCAAGAAATAGCCCTT	-20	3'-5'	1|0	78.56	transcript for ENSG00000142677.3 protein_coding IL22RA1
1	24468502	1	GGTCCCCCATCTCAAAGGGC	-1	5'-3'	1|0	76.509	transcript for ENSG00000142677.3 protein_coding IL22RA1
1	24468502	2	CTTGGGGCCCCCATCTCAAA	-6	5'-3'	1|0	77.3266	transcript for ENSG00000142677.3 protein_coding IL22RA1
1	24579421	1	GTTACAGCCCTCTATCCTCA	0	5'-3'	0|1	76.425
1	24579421	2	CGTACAGCCCTCTATCCTCA	-1	5'-3'	0|1	80.714
1	24624256	1	GGAGGTTATGTCCACCCTAA	-19	5'-3'	1|0	84.6485
1	24624256	1	GTTATGTCCACCCTAAGGGA	-15	5'-3'	1|0	78.8532
1	24626543	2	AGAGTGACGGTTGATAGGTA	-2	3'-5'	1|0	86.8677
1	24626543	2	GAGTGACGGTTGATAGGTAC	-3	3'-5'	1|0	90.9063
1	24626871	1	ATAGCATTCAAATGACGTGT	-15	5'-3'	1|0	84.0145
1	24717383	1	AAGGAGGATCACCTGAACCG	-3	3'-5'	0|1	87.0072	transcript for ENSG00000001460.13 protein_coding STPG1
1	24717383	1	AGCCTCGACCTCCTCGGTTC	-14	5'-3'	0|1	88.7155	transcript for ENSG00000001460.13 protein_coding STPG1
1	24717383	1	CACCTGAACCGAGGAGGTCG	-12	3'-5'	0|1	86.5277	transcript for ENSG00000001460.13 protein_coding STPG1
1	24717383	2	AATGCAGCCTCGACCTCCTC	-19	5'-3'	0|1	76.3131	transcript for ENSG00000001460.13 protein_coding STPG1
1	24717383	2	ACCTGAACCTGAGGAGGTCG	-12	3'-5'	0|1	78.6313	transcript for ENSG00000001460.13 protein_coding STPG1
1	24717383	2	GCCTCGACCTCCTCAGGTTC	-13	5'-3'	0|1	77.8462	transcript for ENSG00000001460.13 protein_coding STPG1
1	24872993	1	ACTTTGGAGAAAAGTCCGAT	-8	5'-3'	0|1	83.808	transcript for ENSG00000264443.1 lincRNA RP4-594I10.3
1	24872993	2	GACTTTGGAGAAAGTCCGAT	-9	5'-3'	0|1	89.0567	transcript for ENSG00000264443.1 lincRNA RP4-594I10.3
1	24900515	1	GATACGCTCATCTCCTGTGT	-10	5'-3'	1|0	79.7583	transcript for ENSG00000184454.6 protein_coding NCMAP
1	24900515	1	GGAGTTCTGCTGTCCAACAC	3	3'-5'	1|0	78.1597	transcript for ENSG00000184454.6 protein_coding NCMAP
1	24922446	1	GGTACTTAGTATGTTACCAG	-7	3'-5'	1|0	75.572	transcript for ENSG00000184454.6 protein_coding NCMAP
1	24922446	2	AGGTACTTAGTATGTACCAG	-7	3'-5'	1|0	80.269	transcript for ENSG00000184454.6 protein_coding NCMAP
1	24960845	1	GGACTACAGGCACACCACCA	-7	3'-5'	1|0	78.9151	transcript for ENSG00000133226.12 protein_coding SRRM1
1	25077977	1	GACCTAGTGATCCACCCGCT	-17	5'-3'	0|1	95.4561	transcript for ENSG00000169504.10 protein_coding CLIC4
1	25077977	1	GGCCGAGCGGGTGGATCACT	-15	3'-5'	0|1	86.0213	transcript for ENSG00000169504.10 protein_coding CLIC4
1	25250533	1	GAATTGAATCTTCACCACCC	-17	3'-5'	1|0	79.6954	transcript for ENSG00000020633.14 protein_coding RUNX3
1	25313846	1	GGCCACATATTCTGGTGATG	-8	5'-3'	1|0	78.6901
1	25313846	2	CTGAAGTGGCCACATACTTC	-15	5'-3'	1|0	76.335
1	25417032	1	AGTCACATGTAATCTTCGCA	-4	5'-3'	0|1	85.1832	transcript for ENSG00000233755.1 lincRNA RP4-799D16.1
1	25438323	1	GTTTATTGAGCCCCCCTCCT	-3	5'-3'	1|0	75.5606	transcript for ENSG00000233755.1 lincRNA RP4-799D16.1
1	25438323	2	GCCAATTGAGCCCCCCTCCT	33	5'-3'	1|0	82.1048	transcript for ENSG00000233755.1 lincRNA RP4-799D16.1
1	25438323	2	GGCCAATTGAGCCCCCCTCC	32	5'-3'	1|0	82.5649	transcript for ENSG00000233755.1 lincRNA RP4-799D16.1
1	25788500	1	ACAGAGGCGACGGCTAAGGA	-16	3'-5'	1|0	82.1937	transcript for ENSG00000204178.5 protein_coding TMEM57
1	25788500	1	CAGAGGCGACGGCTAAGGAA	-17	3'-5'	1|0	78.4963	transcript for ENSG00000204178.5 protein_coding TMEM57
1	25788500	2	AAACAGGCGACGGCTAAGGA	-16	3'-5'	1|0	81.2389	transcript for ENSG00000204178.5 protein_coding TMEM57
1	25788500	2	AACAGGCGACGGCTAAGGAA	-17	3'-5'	1|0	77.6492	transcript for ENSG00000204178.5 protein_coding TMEM57
1	25828322	1	CGGCACCCTAGAGAGGTTAA	-7	3'-5'	0|1	88.7669
1	25828322	2	AAACGGCACCCTAGAGGTTA	-6	3'-5'	0|1	88.0567
1	25828322	2	AACGGCACCCTAGAGGTTAA	-7	3'-5'	0|1	85.6264
1	25828322	2	GTGAGGAAACGGCACCCTAG	0	3'-5'	0|1	85.2981
1	25889342	2	AAACCGAGACTGAGCGGTGA	-11	3'-5'	0|1	86.5029	transcript for ENSG00000157978.7 protein_coding LDLRAP1
1	25889342	2	AACCGAGACTGAGCGGTGAA	-12	3'-5'	0|1	88.9368	transcript for ENSG00000157978.7 protein_coding LDLRAP1
1	25889342	2	GTCCCTTCACCGCTCAGTCT	-14	5'-3'	0|1	80.0021	transcript for ENSG00000157978.7 protein_coding LDLRAP1
1	26085048	1	AGCCCCCGTCATCCCCCCTT	-4	3'-5'	0|1	81.356	transcript for ENSG00000117643.10 protein_coding MAN1C1
1	26102232	1	CACCAGCTAAGCCCCGAAGC	1	5'-3'	0|1	82.582	transcript for ENSG00000117643.10 protein_coding MAN1C1
1	26102232	2	GACCAGCTAAGCCCCGAAGC	0	5'-3'	0|1	87.8455	transcript for ENSG00000117643.10 protein_coding MAN1C1
1	26174335	2	ACCTCGCCTCCCAAGTAGCA	-17	3'-5'	1|0	79.3593	transcript for ENSG00000127423.6 protein_coding AUNIP
1	26332466	1	GGGGTGCAGCATGTGTAGTA	1	5'-3'	0|1	80.6221
1	26332466	2	ATGGGTGCAGCATGTGTAGT	-1	5'-3'	0|1	76.5706
1	26593844	2	CTGGTCTCGAACCCGACTTC	-8	3'-5'	0|1	93.3625	transcript for ENSG00000130695.9 protein_coding CEP85
1	26600683	2	CACACACAACTCACTAGATT	0	5'-3'	0|1	77.5992	transcript for ENSG00000130695.9 protein_coding CEP85
1	26622166	1	ACCACCTGCGGGGGTGACAT	-8	3'-5'	1|0	83.1321	transcript for ENSG00000158062.16 protein_coding UBXN11
1	26622166	1	AGTTGGGGGACCACCTGCGG	1	3'-5'	1|0	76.7734	transcript for ENSG00000158062.16 protein_coding UBXN11
1	26622166	1	ATGCCCAATGTCACCCCCGC	-12	5'-3'	1|0	85.235	transcript for ENSG00000158062.16 protein_coding UBXN11
1	26622166	2	ACCACCTGCGGGGTGACATT	-9	3'-5'	1|0	80.9089	transcript for ENSG00000158062.16 protein_coding UBXN11
1	26622166	2	CATGCCCAATGTCACCCCGC	-13	5'-3'	1|0	83.3128	transcript for ENSG00000158062.16 protein_coding UBXN11
1	26622166	2	GACCACCTGCGGGGTGACAT	-8	3'-5'	1|0	81.2431	transcript for ENSG00000158062.16 protein_coding UBXN11
1	26794718	2	GTTCATGGGGGGTCATTTGC	-5	5'-3'	1|0	81.6156	transcript for ENSG00000117682.12 protein_coding DHDDS
1	26798831	2	GTGTGGGGGGGGTTAGTGCG	-8	3'-5'	0|1	78.4005
1	27085548	2	CTAAGATCTGACAGTAACAC	-7	3'-5'	1|0	79.2231	transcript for ENSG00000117713.13 protein_coding ARID1A
1	27131091	2	ATCCCGGCCGGCACCTCGGG	-2	5'-3'	1|0	83.8373
1	27131091	2	GCAATCCCGGCCGGCACCTC	-5	5'-3'	1|0	82.3554
1	27157791	1	CTGTCATGGGCTATTGTGAT	-7	5'-3'	1|0	75.1452	transcript for ENSG00000204160.7 protein_coding ZDHHC18
1	27157791	2	CTGTCATGAGGCTATTGTGA	-7	5'-3'	1|0	80.4255	transcript for ENSG00000204160.7 protein_coding ZDHHC18
1	27194636	2	AACACCGACACACTACCTTA	-21	3'-5'	1|0	83.9035
1	27194636	2	AGGTAGTGTGTCGGTGTTGA	-16	5'-3'	1|0	87.6249
1	27194636	2	CAACACCGACACACTACCTT	-20	3'-5'	1|0	85.6404
1	27247205	2	CAGGCTAAGTCTCAAACACC	-4	3'-5'	1|0	77.7134	transcript for ENSG00000090273.9 protein_coding NUDC
1	27262117	2	ACCAGGTCCTTCCCATGACG	-18	5'-3'	1|0	80.5468	transcript for ENSG00000090273.9 protein_coding NUDC
1	27262117	2	CGTCATGGGAAGGACCTGGT	-21	3'-5'	1|0	77.8151	transcript for ENSG00000090273.9 protein_coding NUDC
1	27463021	2	CAAAACTCCGGTCTTATCCT	-13	3'-5'	0|1	85.9941	transcript for ENSG00000090020.6 protein_coding SLC9A1
1	27489461	2	CAGGCAATCCACCTGCGCCT	-13	5'-3'	0|1	76.2922	transcript for ENSG00000090020.6 protein_coding SLC9A1
1	27503450	1	CGGTGTTTGAGAAGTTCCCC	-15	5'-3'	0|1	76.222	exon for ENSG00000229985.2 pseudogene RP11-40H20.5
1	27503450	2	GTGTTTGAGAAGTTCCCCCT	-13	5'-3'	0|1	77.8018	exon for ENSG00000229985.2 pseudogene RP11-40H20.5
1	27644610	1	GACTGTAGATGTCTCCTTAA	-11	3'-5'	0|1	75.0529
1	27644610	2	GACTGTAGATGGTCTCCTTA	-10	3'-5'	0|1	79.8993
1	27644610	2	GATGGTCTCCTTAAGGGCTC	-17	3'-5'	0|1	77.9815
1	28546526	1	ACCACAACACTATCACCCAT	-12	3'-5'	0|1	77.7546	transcript for ENSG00000126698.6 protein_coding DNAJC8
1	28546526	1	GTGATAGTGTTGTGGTTACA	-5	5'-3'	0|1	75.4628	transcript for ENSG00000126698.6 protein_coding DNAJC8
1	28573707	1	GAGCGGGGCTAGACGGAGTC	-1	5'-3'	0|1	88.796	exon for ENSG00000271398.1 lincRNA RP5-1092A3.5
1	28573707	2	AGCCCCGCCTCCGCGAGAAG	-13	3'-5'	0|1	81.7064	exon for ENSG00000271398.1 lincRNA RP5-1092A3.5
1	28573707	2	AGCCTCTTCTCGCGGAGGCG	-15	5'-3'	0|1	83.7383	exon for ENSG00000271398.1 lincRNA RP5-1092A3.5
1	28573707	2	AGGCGGGGCTAGACGGAGTC	0	5'-3'	0|1	79.4848	exon for ENSG00000271398.1 lincRNA RP5-1092A3.5
1	28573707	2	AGTTCAGCCTCTTCTCGCGG	-20	5'-3'	0|1	91.0937	exon for ENSG00000271398.1 lincRNA RP5-1092A3.5
1	28573707	2	CAGCCTCTTCTCGCGGAGGC	-16	5'-3'	0|1	78.3612	exon for ENSG00000271398.1 lincRNA RP5-1092A3.5
1	29064503	1	GGAAGTACTCTCATGTGATG	-11	5'-3'	0|1	77.3304	transcript for ENSG00000198492.10 protein_coding YTHDF2
1	29064503	2	CTGGAAGTACTCTCGTGATG	-13	5'-3'	0|1	89.4009	transcript for ENSG00000198492.10 protein_coding YTHDF2
1	29303229	1	AGCTGAATAGGGCTACAACA	-15	3'-5'	0|1	82.5839	transcript for ENSG00000159023.14 protein_coding EPB41
1	29303229	1	GTAGCCCTATTCAGCTAGTC	-8	5'-3'	0|1	92.0946	transcript for ENSG00000159023.14 protein_coding EPB41
1	29303229	2	AGCTGAAATAGGGCTACAAC	-14	3'-5'	0|1	82.8317	transcript for ENSG00000159023.14 protein_coding EPB41
1	29303229	2	GCTGAAATAGGGCTACAACA	-15	3'-5'	0|1	83.641	transcript for ENSG00000159023.14 protein_coding EPB41
1	29352596	2	GGATGTCCTCTACCTCACCA	-12	3'-5'	0|1	76.4709	transcript for ENSG00000159023.14 protein_coding EPB41
1	29733904	1	AGCTGTTAGGTAACTCCCCC	-19	5'-3'	1|0	89.7855
1	29733904	1	GTAACTCCCCCTGGATCCAA	-10	5'-3'	1|0	89.6058
1	29733904	2	ACTCACACCTTTGGATCCGG	-4	3'-5'	1|0	83.2273
1	29733904	2	CACTCACACCTTTGGATCCG	-3	3'-5'	1|0	95.5087
1	29733904	2	GAGCTGTTAGGTAACTCCCC	-20	5'-3'	1|0	83.3999
1	29733904	2	GGTAACTCCCCCGGATCCAA	-11	5'-3'	1|0	82.4641
1	29739770	1	CTCCCAGGGAGTGCGTTTGC	21	3'-5'	0|1	87.9896
1	30038597	2	GCCCCTGGGTCCATCATCTT	-9	5'-3'	1|0	76.9454
1	30124661	2	ATGTGATTTATCCACTTGGC	1	3'-5'	0|1	76.0463
1	30217684	2	CACCTGGATTCTCAGAGTCG	-12	5'-3'	1|0	77.2885
1	30219868	2	CTCAATCACAGTGCTGGTAT	-17	3'-5'	0|1	75.4571
1	30404768	1	GGTCAACCCCGTAACAGCCA	-12	3'-5'	1|0	90.0653
1	30404768	2	CGGTCAACCCGTAACAGCCA	-12	3'-5'	1|0	87.983
1	30434076	1	GGTCCCCCCCCCACCTATCA	-10	3'-5'	1|0	75.9329
1	30456801	1	CATAATTGGGTCCTTGTTGG	-8	5'-3'	1|0	82.8472
1	30481847	1	ATGGGGTCCTTGAGTTCCAA	-1	5'-3'	1|0	75.2241
1	30520894	1	GAAGGGAATCCAAACACGTT	-8	3'-5'	0|1	87.5731
1	30520894	2	GAGAACTTAGCCTAACGTGT	-18	5'-3'	0|1	94.6449
1	30520894	2	GGAAGGGAATCCAACACGTT	-8	3'-5'	0|1	86.5918
1	30521479	1	AACAAGCCCCCCTCAATCCA	-10	3'-5'	0|1	84.0169
1	30521479	1	ACAAGCCCCCCTCAATCCAG	-11	3'-5'	0|1	78.5002
1	30553120	1	GCGTGAGGATGATACCATGG	22	5'-3'	1|0	81.0705
1	30696719	1	ACCCTTGGAGATGCCATTAC	-18	3'-5'	1|0	76.0677
1	30696719	2	CACCTTGGAGATGCCATTAC	-18	3'-5'	1|0	81.5165
1	30696719	2	GGGCTAATATGTCCTCACCT	-3	3'-5'	1|0	80.0328
1	30731566	1	CAAATGGCTATGATCCTATG	1	3'-5'	1|0	76.5004
1	30752119	1	AGCTGAACAGCTCTAGTAGG	-16	5'-3'	0|1	84.655
1	30860657	1	AGTGAGTCGTAGCCAATTTC	2	5'-3'	0|1	87.4513
1	30860657	2	ATGGAGTCGTAGCCAATTTC	-2	5'-3'	0|1	82.8562
1	30940693	2	AAAAGGGGGGGGTGCTTAAT	-10	3'-5'	0|1	79.0067
1	31020549	1	AGACCTGTCGAGGGGTAGTG	-7	5'-3'	1|0	86.9729
1	31020549	1	CACACACTGAGACCTGTCGA	-16	5'-3'	1|0	88.0993
1	31020549	2	ACACACTGAGACCTGTCCGA	-15	5'-3'	1|0	80.1553
1	31020549	2	CTCCACACTACCCCTCGGAC	-4	3'-5'	1|0	86.5105
1	31020549	2	CTGTCCGAGGGGTAGTGTGG	-3	5'-3'	1|0	83.1514
1	31020549	2	GACCTGTCCGAGGGGTAGTG	-6	5'-3'	1|0	83.9222
1	31058553	1	CTCACTGGGAGAGCGCAGAC	-13	5'-3'	0|1	77.678
1	31177880	1	AGCCCTCCGTCCCCCCGCAA	-6	3'-5'	1|0	78.3645
1	31177880	1	GCCCTCCGTCCCCCCGCAAT	-7	3'-5'	1|0	80.7365
1	31177880	2	GCCCTCCGTCCCCCCCGCAA	-6	3'-5'	1|0	89.458
1	31270810	1	ACTATGCTAGATCAACCTTG	-14	5'-3'	1|0	83.361
1	31270810	1	AGACTATGCTAGATCAACCT	-16	5'-3'	1|0	85.0925
1	31270810	1	GACTATGCTAGATCAACCTT	-15	5'-3'	1|0	84.6054
1	31270810	2	AAGACTATGCTAGATCAACT	-17	5'-3'	1|0	85.8862
1	31698571	1	CTAGAATTTAAGATGTCCGG	-17	5'-3'	0|1	90.2614	transcript for ENSG00000084628.5 protein_coding NKAIN1
1	31806155	1	ATCTCTTGATCCACCCGCCC	-20	3'-5'	1|0	85.0444	transcript for ENSG00000121766.10 protein_coding ZCCHC17
1	31806155	2	GACTCTTGATCCACCCGCCC	-20	3'-5'	1|0	80.8464	transcript for ENSG00000121766.10 protein_coding ZCCHC17
1	31806155	2	GGGCGGGTGGATCAAGAGTC	-17	5'-3'	1|0	86.4701	transcript for ENSG00000121766.10 protein_coding ZCCHC17
1	31820865	1	GGGCCCCTCAGTACCACTAT	-5	5'-3'	1|0	86.0544	transcript for ENSG00000121766.10 protein_coding ZCCHC17
1	31820865	2	AAGGGCCCCAGTACCACTAT	-7	5'-3'	1|0	86.1815	transcript for ENSG00000121766.10 protein_coding ZCCHC17
1	31820865	2	ACTGAGCCTATAGTGGTACT	-1	3'-5'	1|0	88.8096	transcript for ENSG00000121766.10 protein_coding ZCCHC17
1	31820865	2	CACTGAGCCTATAGTGGTAC	0	3'-5'	1|0	88.0023	transcript for ENSG00000121766.10 protein_coding ZCCHC17
1	31821932	2	ACCTATCCTCCCAAGTAGCT	-18	3'-5'	0|1	78.8081	transcript for ENSG00000121766.10 protein_coding ZCCHC17
1	31821932	2	AGCTACTTGGGAGGATAGGT	-15	5'-3'	0|1	75.3848	transcript for ENSG00000121766.10 protein_coding ZCCHC17
1	31821932	2	ATAGGTGGGAGGATTGCTCG	-1	5'-3'	0|1	89.1083	transcript for ENSG00000121766.10 protein_coding ZCCHC17
1	31821932	2	CACCTATCCTCCCAAGTAGC	-17	3'-5'	0|1	76.4351	transcript for ENSG00000121766.10 protein_coding ZCCHC17
1	31846388	2	CAAGTGAGTCCGAGGCTCAC	-4	5'-3'	1|0	76.5903	transcript for ENSG00000121769.3 protein_coding FABP3
1	31855067	1	GGTTATCCATACTCAGCATG	-3	3'-5'	0|1	75.5815
1	31855067	2	GTTATCCATACTCAGCATTG	-3	3'-5'	0|1	80.0651
1	31910430	1	CTGAAGGCGTCTAACTCTGA	-10	3'-5'	0|1	86.3035
1	31910430	1	GCTGAAGGCGTCTAACTCTG	-9	3'-5'	0|1	87.5691
1	31910430	2	CTGAAGGCGTCTTAACTCTG	-9	3'-5'	0|1	81.438
1	31920316	1	GTACACGTTTGTGTGGCTAC	-16	3'-5'	0|1	88.7971
1	31920316	2	ACACATGTTTGTGTGGCTAC	-16	3'-5'	0|1	75.5649
1	31974307	1	CTGGAACGGGACTTCCTCAG	-15	5'-3'	0|1	75.7805
1	32039880	1	GCCAACAAGTGCACAAATGC	-8	5'-3'	0|1	78.7818	transcript for ENSG00000229167.1 antisense RP11-73M7.1
1	32039880	2	ACATACAAGCCAACAAGTGC	-16	5'-3'	0|1	75.2861	transcript for ENSG00000229167.1 antisense RP11-73M7.1
1	32078865	1	CGTGACACTTAAGTGGCATT	-6	3'-5'	0|1	77.664
1	32092918	1	GGGAAGGCCTGTAATTGGGT	-9	3'-5'	0|1	75.8784	transcript for ENSG00000121764.7 protein_coding HCRTR1
1	32120077	1	AGCGGCACTGTAAGATGGCT	-11	3'-5'	0|1	84.6074	transcript for ENSG00000235790.3 antisense RP11-73M7.6
1	32120077	1	GAGCGGCACTGTAAGATGGC	-10	3'-5'	0|1	81.0241	transcript for ENSG00000235790.3 antisense RP11-73M7.6
1	32120077	1	GGGCGAGCGGCACTGTAAGA	-6	3'-5'	0|1	85.9007	transcript for ENSG00000235790.3 antisense RP11-73M7.6
1	32120077	2	AGCGGCACTGTTAAGATGGC	-10	3'-5'	0|1	86.2141	transcript for ENSG00000235790.3 antisense RP11-73M7.6
1	32120077	2	GCGGCACTGTTAAGATGGCT	-11	3'-5'	0|1	82.3457	transcript for ENSG00000235790.3 antisense RP11-73M7.6
1	32120077	2	GGCGAGCGGCACTGTTAAGA	-6	3'-5'	0|1	89.4889	transcript for ENSG00000235790.3 antisense RP11-73M7.6
1	32290392	1	GTGGAGGTTAATATCACCTG	-2	3'-5'	1|0	91.761
1	32290392	2	CGGTGGAGGTTAATATCACC	1	3'-5'	1|0	75.7761
1	32290392	2	GGGGGTGCGTGGTAGCCACC	-17	5'-3'	1|0	76.8932
1	33202452	2	AGGAGAAATGGCTCGCGCAT	-4	3'-5'	0|1	96.0083
1	33202452	2	GCTCGCGCATAGGGTGTTAG	-14	3'-5'	0|1	95.2754
1	33202452	2	GGAGAAATGGCTCGCGCATA	-5	3'-5'	0|1	97.6781
1	33358762	1	GCTCAGGAGCGCGTGCCCCG	2	3'-5'	1|0	96.6095	transcript for ENSG00000121905.5 protein_coding HPCA
1	33358762	2	CTTACCCCCGACGCGCGTCC	-17	5'-3'	1|0	78.8842	transcript for ENSG00000121905.5 protein_coding HPCA
1	33435187	1	GAAGCTAGGACACATAAGCT	1	3'-5'	1|0	76.2671
1	33720329	1	CTTTCCATATTGTGCGCTTG	4	5'-3'	1|0	91.0375
1	33720329	2	CTCTCCATATTGTGCGCTTG	-2	5'-3'	1|0	88.8182
1	33727981	2	ACTTGTAAGCTCCGCCTCCT	-1	5'-3'	0|1	81.9448	transcript for ENSG00000160094.10 protein_coding ZNF362
1	33727981	2	AGGCGGAGCTTACAAGTGAG	-7	3'-5'	0|1	78.9553	transcript for ENSG00000160094.10 protein_coding ZNF362
1	33727981	2	CACTTGTAAGCTCCGCCTCC	-2	5'-3'	0|1	82.3197	transcript for ENSG00000160094.10 protein_coding ZNF362
1	33727981	2	GAGGCGGAGCTTACAAGTGA	-6	3'-5'	0|1	84.7759	transcript for ENSG00000160094.10 protein_coding ZNF362
1	33727981	2	GGAGGCGGAGCTTACAAGTG	-5	3'-5'	0|1	81.7079	transcript for ENSG00000160094.10 protein_coding ZNF362
1	34038646	2	CTAAGAGAGATCCCCCTCAG	-6	3'-5'	0|1	79.5523	transcript for ENSG00000121904.13 protein_coding CSMD2
1	34170925	2	GTAACGGCAATACATCTCAA	-5	5'-3'	1|0	85.4388	transcript for ENSG00000121904.13 protein_coding CSMD2
1	34266590	1	AATGTCAGGGACATACTCGT	0	3'-5'	1|0	88.4813	transcript for ENSG00000121904.13 protein_coding CSMD2
1	34309264	1	CTCTGGCTGGCATTACCACC	-20	3'-5'	1|0	80.1309	transcript for ENSG00000121904.13 protein_coding CSMD2
1	34309888	1	GTGTGGGGGGGCGCTGCTAA	-3	5'-3'	1|0	80.5915	transcript for ENSG00000121904.13 protein_coding CSMD2
1	34378012	1	GTGGGGGGGTGTATGATGCG	-13	3'-5'	0|1	84.1308	transcript for ENSG00000121904.13 protein_coding CSMD2
1	34378012	2	GTGGGGGGTGTATGATGCGG	-14	3'-5'	0|1	86.1883	transcript for ENSG00000121904.13 protein_coding CSMD2
1	34421405	2	GACACTATTAGACAAAGTGC	-12	5'-3'	0|1	76.3898	transcript for ENSG00000121904.13 protein_coding CSMD2
1	34429839	1	AGAGGTTAAGTCCCACATCT	-15	3'-5'	1|0	77.4012	transcript for ENSG00000121904.13 protein_coding CSMD2
1	34429839	2	GAGGTTTAAGTCCCACATCT	-15	3'-5'	1|0	76.2461	transcript for ENSG00000121904.13 protein_coding CSMD2
1	34633225	1	CGCTCAGGGCCCCCGAGCAC	-10	3'-5'	0|1	75.158	transcript for ENSG00000142698.10 protein_coding C1orf94
1	34870448	2	ACTCCCAATACTGTTGCAAT	0	5'-3'	1|0	76.0273
1	34870448	2	GTATTGGGAGTAAGGCCTAA	-12	3'-5'	1|0	79.6241
1	34991405	1	AGAAAGCCAACCCCCCCGCC	-17	5'-3'	1|0	79.4781
1	34991405	1	GGAGGGGTGGTAGTCCGGGC	-3	3'-5'	1|0	79.2194
1	35024362	1	AGCTAGTTCTGACTGGTGTA	-4	5'-3'	0|1	76.8442
1	35024362	2	CTATTCTGACTGGTGTAAGG	-2	5'-3'	0|1	77.9296
1	35146471	1	GATCCAACTCACTAAGTTAC	-4	5'-3'	0|1	86.92
1	35146471	2	ATCCAAACTCACTAAGTTAC	-3	5'-3'	0|1	76.2057
1	35150894	2	ATGCTGCGTGCATAGACTGA	-12	5'-3'	0|1	82.4361
1	35155383	1	CGTAGTCAGCTACAGAGAGC	-13	3'-5'	1|0	84.6798
1	35155383	1	CTCTGTAGCTGACTACGTTA	-7	5'-3'	1|0	95.1563
1	35155383	1	GCTGACTACGTTAAGGGTGA	0	5'-3'	1|0	77.4873
1	35155383	2	ACTGACTACGTTAAGGGTGA	4	5'-3'	1|0	92.5911
1	35155383	2	GTAGCTGACTGACTACGTTA	-3	5'-3'	1|0	87.8563
1	35186847	2	GTGGGAGCTCCCGAGGCATT	-1	3'-5'	0|1	80.582	transcript for ENSG00000163866.8 protein_coding SMIM12
1	35221119	1	GCAGGAGTCCTACCTTAGAC	0	5'-3'	0|1	87.4389	transcript for ENSG00000163866.8 protein_coding SMIM12
1	35222314	1	GCATTGAGTGGCACTTGAGC	-3	5'-3'	0|1	76.9804	transcript for ENSG00000163866.8 protein_coding SMIM12
1	35222314	2	AGCTTTCAGCTGGATTGCAT	-19	5'-3'	0|1	78.4547	transcript for ENSG00000163866.8 protein_coding SMIM12
1	35276012	1	GAATGAATAGTCGTGATATT	-15	3'-5'	0|1	76.9861	transcript for ENSG00000163866.8 protein_coding SMIM12
1	35305240	2	GAGGGCTGACGTATCAAATT	-11	3'-5'	1|0	83.2284	transcript for ENSG00000163866.8 protein_coding SMIM12
1	35347307	2	GGTTTATCCCAGGATATCCC	-3	5'-3'	0|1	81.5715	transcript for ENSG00000116544.7 protein_coding DLGAP3
1	35357969	2	CATGCTTGATGTTGTCCCAT	-17	3'-5'	0|1	80.3781	transcript for ENSG00000116544.7 protein_coding DLGAP3
1	36623743	1	GGGCAGGGGGGATGTTCGGT	-4	5'-3'	1|0	83.7708	transcript for ENSG00000116871.11 protein_coding MAP7D1
1	36643700	2	CAAGCGCAGGGCCAGTAACG	-19	5'-3'	1|0	90.318	exon for ENSG00000116871.11 protein_coding MAP7D1
1	36750916	1	AACCACTACTCCTAAGCAGC	-18	3'-5'	1|0	77.658	transcript for ENSG00000054118.9 protein_coding THRAP3
1	36773074	1	CAGATTATCCTAGGGACTCT	-18	5'-3'	0|1	77.1863	transcript for ENSG00000214193.5 protein_coding SH3D21
1	36773074	1	GATTATCCTAGGGACTCTTG	-16	5'-3'	0|1	84.1392	transcript for ENSG00000214193.5 protein_coding SH3D21
1	36773074	2	GGCAGATTATCCTAGGGACT	-20	5'-3'	0|1	82.3193	transcript for ENSG00000214193.5 protein_coding SH3D21
1	36864071	1	GACCAGTCTGGGCAACAATG	-15	5'-3'	0|1	78.5396
1	36864800	2	CTGGGGAGAGTGGTATAACG	-18	5'-3'	0|1	87.6836
1	37511657	1	ACTGCAACAGTTAACTGTCT	-6	3'-5'	1|0	82.8038
1	37511657	2	CTGCAACAGTTAACTCTGTC	-5	3'-5'	1|0	75.0041
1	37588479	1	GGAAACTCGGAGCTATTGCC	-14	3'-5'	0|1	87.1267
1	37728566	1	GAATGACCCCCTTTGTTCAC	-11	3'-5'	0|1	77.4619	transcript for ENSG00000223944.1 lincRNA RP5-1180C18.1
1	37746324	1	CAGTAACCATGATAGAGCTT	-10	5'-3'	0|1	75.6927	transcript for ENSG00000223944.1 lincRNA RP5-1180C18.1
1	37746324	1	CTCTATCATGGTTACTGTCC	-16	3'-5'	0|1	81.3774	transcript for ENSG00000223944.1 lincRNA RP5-1180C18.1
1	37746324	2	ATTCATCATGGTTACTGTCC	-16	3'-5'	0|1	81.1543	transcript for ENSG00000223944.1 lincRNA RP5-1180C18.1
1	37816499	2	CAGAGGAATGCTGGTCTAAC	0	3'-5'	0|1	85.829
1	37816517	2	GTTAGACCAGCAAACTCATT	-11	5'-3'	0|1	79.3271
1	37883731	1	CACTGCAAACCTCCGCATCC	-13	3'-5'	1|0	87.7283
1	37888452	1	GGCTGAGGACTGATATGGTT	-6	3'-5'	0|1	76.2401
1	37893885	1	GATGGGGGGTTCATCATTGT	-13	3'-5'	0|1	86.161
1	37893885	2	ATGGGGGGGTTCATCATTGT	-13	3'-5'	0|1	82.2714
1	37909026	1	GGAGAAGAGGTTGGGTACCG	3	5'-3'	1|0	81.9386
1	37909026	2	AGAGAAGAGGTTGGGTACCG	0	5'-3'	1|0	80.1962
1	38339012	2	AAAGAGTATTATAGTCCAAC	-6	5'-3'	0|1	75.1207	transcript for ENSG00000204084.8 protein_coding INPP5B
1	38339012	2	AAGAGTATTATAGTCCAACT	-5	5'-3'	0|1	75.4627	transcript for ENSG00000204084.8 protein_coding INPP5B
1	38344700	2	GGCCAAGGCGGGGGATCATG	-8	5'-3'	0|1	79.0541	transcript for ENSG00000204084.8 protein_coding INPP5B
1	38399891	2	AAGTAATAGGGGCCGGATGG	0	3'-5'	1|0	82.2093	transcript for ENSG00000204084.8 protein_coding INPP5B
1	38399891	2	ACAGGTGTGAGCCCCCCATC	-12	5'-3'	1|0	80.6847	transcript for ENSG00000204084.8 protein_coding INPP5B
1	38399891	2	AGTAATAGGGGCCGGATGGG	-1	3'-5'	1|0	80.3198	transcript for ENSG00000204084.8 protein_coding INPP5B
1	38681844	1	AAGCCAGGGAGCCGATTTCA	-14	5'-3'	1|0	82.5028
1	38681844	1	ATTCCTTGAAATCGGCTCCC	-11	3'-5'	1|0	77.3221
1	38681844	2	AAAGCCAGGGAGCCGATTCA	-15	5'-3'	1|0	86.4865
1	38702855	1	ACAATAAGGGACCCCATTGC	-15	3'-5'	0|1	88.6368
1	38702855	1	ATAAGGGACCCCATTGCTGG	-18	3'-5'	0|1	78.4274
1	38702855	2	GACAATAGGGACCCCATTGC	-15	3'-5'	0|1	87.6636
1	38720240	1	ACTCTATACCAACCAGTCAC	2	5'-3'	0|1	85.9229
1	38841963	1	GTAGCCTAGAAGATTCCCTT	-1	3'-5'	0|1	78.5073
1	38981294	1	GCCTGTCACAAGGTTTATCT	-8	5'-3'	1|0	77.1813
1	38981294	2	CTCCAAGATAAACCTGTGAC	-7	3'-5'	1|0	80.9005
1	39077036	1	AGCATCGGAGAGATGTTGTG	-7	3'-5'	1|0	75.3284
1	39077036	1	CAGCATCGGAGAGATGTTGT	-6	3'-5'	1|0	76.2855
1	39077036	2	AAGCAGCATCGGAGAGTTGT	-6	3'-5'	1|0	80.5331
1	39077036	2	AGCAGCATCGGAGAGTTGTG	-7	3'-5'	1|0	80.7724
1	39141113	1	GCTTAATTCCATCAGCCCAT	-18	5'-3'	1|0	80.4713
1	39442566	2	AATACAAAAGCCAGGCGTAG	-13	3'-5'	1|0	80.7572
1	39568103	1	ACCTATTAATTGGAGGCGGG	-13	5'-3'	1|0	75.9759	transcript for ENSG00000127603.19 protein_coding MACF1
1	39568103	1	AGGACCTATTAATTGGAGGC	-16	5'-3'	1|0	81.2012	transcript for ENSG00000127603.19 protein_coding MACF1
1	39568103	1	GACCTATTAATTGGAGGCGG	-14	5'-3'	1|0	76.5963	transcript for ENSG00000127603.19 protein_coding MACF1
1	39568103	1	GAGGACCTATTAATTGGAGG	-17	5'-3'	1|0	77.8178	transcript for ENSG00000127603.19 protein_coding MACF1
1	39568103	1	GGACCTATTAATTGGAGGCG	-15	5'-3'	1|0	80.1229	transcript for ENSG00000127603.19 protein_coding MACF1
1	39568103	2	AGGACCTATTAATTGGAGGG	-16	5'-3'	1|0	86.8372	transcript for ENSG00000127603.19 protein_coding MACF1
1	39568103	2	AGGAGGACCTATTAATTGGA	-19	5'-3'	1|0	78.2991	transcript for ENSG00000127603.19 protein_coding MACF1
1	39568103	2	GAGGACCTATTAATTGGAGG	-17	5'-3'	1|0	88.4348	transcript for ENSG00000127603.19 protein_coding MACF1
1	39568103	2	GGACCTATTAATTGGAGGGG	-15	5'-3'	1|0	76.5963	transcript for ENSG00000127603.19 protein_coding MACF1
1	39568103	2	GGAGGACCTATTAATTGGAG	-18	5'-3'	1|0	89.8829	transcript for ENSG00000127603.19 protein_coding MACF1
1	39615407	1	AGGACTTTAAATATCGGGCT	-7	3'-5'	1|0	93.0536	transcript for ENSG00000127603.19 protein_coding MACF1
1	39615407	1	GAGGACTTTAAATATCGGGC	-6	3'-5'	1|0	86.4058	transcript for ENSG00000127603.19 protein_coding MACF1
1	39615407	2	CTTTAAATATCATATCGGGC	-6	3'-5'	1|0	92.4691	transcript for ENSG00000127603.19 protein_coding MACF1
1	39736463	1	CAGGGATATGGTCTACCTAC	-4	5'-3'	0|1	90.4428	transcript for ENSG00000127603.19 protein_coding MACF1
1	39736463	2	GATATATATGGTCTACCTAC	0	5'-3'	0|1	83.4636	transcript for ENSG00000127603.19 protein_coding MACF1
1	39976059	2	GACTTCCCCAGCAACCTGAC	-11	5'-3'	0|1	78.0271	transcript for ENSG00000183682.7 protein_coding BMP8A
1	39987595	2	AAACTTCGCATAAGCAACCG	-16	3'-5'	1|0	87.3279	transcript for ENSG00000183682.7 protein_coding BMP8A
1	40025197	2	AGACCTGCCCAGGATGCGTA	-5	5'-3'	0|1	87.4429
1	40025197	2	GAGACCTGCCCAGGATGCGT	-6	5'-3'	0|1	82.0351
1	40041371	1	CTGCCAGAAGACGACTCCCG	-6	5'-3'	0|1	92.1016	transcript for ENSG00000090621.9 protein_coding PABPC4
1	40041371	1	GGACCCCGGGAGTCGTCTTC	-3	3'-5'	0|1	92.2703	transcript for ENSG00000090621.9 protein_coding PABPC4
1	40041371	2	CGGGAGTCGTCTTTCTGGCA	-8	3'-5'	0|1	82.3492	transcript for ENSG00000090621.9 protein_coding PABPC4
1	40041371	2	CTGCCAGAAAGACGACTCCC	-6	5'-3'	0|1	84.717	transcript for ENSG00000090621.9 protein_coding PABPC4
1	40041371	2	GACCCCGGGAGTCGTCTTTC	-3	3'-5'	0|1	93.8007	transcript for ENSG00000090621.9 protein_coding PABPC4
1	40041699	2	CAAAGGGGCGCCTTCGGAGC	-13	5'-3'	0|1	86.8965	exon for ENSG00000090621.9 protein_coding PABPC4
1	40137790	1	AGGCGAGTCCCGGCGAGGGA	-1	5'-3'	1|0	84.4051
1	40137790	2	CGGGACTCGCTTCCCTCGCC	7	3'-5'	1|0	80.4182
1	40253768	2	GGGAGGGTGCGCGCATCCGC	-14	3'-5'	0|1	84.9275	transcript for ENSG00000116985.6 protein_coding BMP8B
1	40253768	2	GGGGAGGGTGCGCGCATCCG	-13	3'-5'	0|1	83.5175	transcript for ENSG00000116985.6 protein_coding BMP8B
1	40298568	1	CACGACCACGTGAAGAAAGC	4	5'-3'	0|1	76.2266
1	40298568	1	CTTCACGTGGTCGTGGTCAT	-4	3'-5'	0|1	93.4889
1	40299684	1	GATGATGCTTGAGCCCGGGA	-16	3'-5'	0|1	80.8698
1	40299684	2	ATGATTGCTTGAGCCCGGGA	-16	3'-5'	0|1	86.5333
1	41024871	1	GGCAGGCCAGCGCGAGTTCC	-6	3'-5'	1|0	86.1174
1	41024871	2	AGCGCGTTCCGGGTGGGCGT	-16	3'-5'	1|0	91.2745
1	41024871	2	CACGCCCACCCGGAACGCGC	-14	5'-3'	1|0	77.6699
1	41024871	2	CAGCGCGTTCCGGGTGGGCG	-15	3'-5'	1|0	88.2919
1	41024871	2	CAGGCCAGCGCGTTCCGGGT	-10	3'-5'	1|0	84.6608
1	41024871	2	CTGGCAGGCCAGCGCGTTCC	-6	3'-5'	1|0	84.8243
1	41024871	2	GCAGGCCAGCGCGTTCCGGG	-9	3'-5'	1|0	87.3497
1	41024871	2	GCTGGCAGGCCAGCGCGTTC	-5	3'-5'	1|0	87.9721
1	41063209	2	CACGGTAGCCTCAACTTCCC	-18	3'-5'	1|0	75.8079
1	41193050	2	AAAAATTAGCTGGTTGTCGG	-4	3'-5'	0|1	90.3234	transcript for ENSG00000066136.15 protein_coding NFYC
1	41244187	2	GCTCCAAAGAGGCTAGAGAC	-11	3'-5'	1|0	76.2733
1	41245118	2	ACCCACTAGACGAGAGGTGC	-9	3'-5'	2|1	83.1553
1	41245118	2	ACTAGACGAGAGGTGCTGGA	-13	3'-5'	2|1	76.2051
1	41330172	2	CGGAAAATCTCTGCCCAATT	-6	5'-3'	0|1	79.7897	transcript for ENSG00000229528.1 antisense RP5-1066H13.4
1	41355215	1	GGTATCTCTCCCAACTGTGT	-20	3'-5'	0|1	78.4069
1	41392215	1	CTAAGTGGATATCCCCCCCC	-15	5'-3'	1|0	90.4311
1	41431362	1	CTCATCCGCGTGGTCAAGGC	-5	3'-5'	0|1	83.3788
1	41431362	2	CATCCGCGTGGTCAAAGGCT	-6	3'-5'	0|1	85.4229
1	41431362	2	GAACCCAGCCTTTGACCACG	-9	5'-3'	0|1	79.7637
1	41431362	2	GTCCTCATCCGCGTGGTCAA	-1	3'-5'	0|1	92.9233
1	41486600	1	GACGGGATCTGCCCAAAAAG	-2	5'-3'	0|1	86.917	transcript for ENSG00000171790.11 protein_coding SLFNL1
1	41900461	1	GAGGCATTCAACCCTGCCGG	1	3'-5'	1|0	87.0766
1	42239181	1	CTGGATTCCGGGAGGGTGTC	-10	3'-5'	0|1	77.0955	transcript for ENSG00000127124.9 protein_coding HIVEP3
1	42239181	2	ACTGGATTCCGGAGGGTGTC	-10	3'-5'	0|1	84.6182	transcript for ENSG00000127124.9 protein_coding HIVEP3
1	42239181	2	CTTTAGATACTGGATTCCGG	-2	3'-5'	0|1	86.427	transcript for ENSG00000127124.9 protein_coding HIVEP3
1	42531497	2	ACACACCCATTTAGATAGAT	-10	5'-3'	0|1	78.823
1	42842237	2	GGCCAGTTCAAGATGAGCTC	-3	5'-3'	0|1	78.442
1	42861213	1	CATGAGCCTCTGATTGTTGA	-6	5'-3'	0|1	75.5709	transcript for ENSG00000177181.10 protein_coding RIMKLA
1	42861213	1	GCATGAGCCTCTGATTGTTG	-7	5'-3'	0|1	76.9638	transcript for ENSG00000177181.10 protein_coding RIMKLA
1	42861213	1	GGAAAGCCCTCAACAATCAG	0	3'-5'	0|1	76.1614	transcript for ENSG00000177181.10 protein_coding RIMKLA
1	42878870	1	GAAAATATGGCCGGGCGCAG	13	5'-3'	0|1	81.518	transcript for ENSG00000177181.10 protein_coding RIMKLA
1	42878870	2	ATTCTCAGTGCCGGGCGCAG	-8	5'-3'	0|1	76.4412	transcript for ENSG00000177181.10 protein_coding RIMKLA
1	42899597	1	GATAGCCAACCTTAACATGA	-11	3'-5'	0|1	79.9346	transcript for ENSG00000066185.8 protein_coding ZMYND12
1	42973407	2	AACCCCCTAACTAACTATGC	-5	3'-5'	0|1	89.4443	transcript for ENSG00000186409.10 protein_coding CCDC30
1	43015147	1	ATGTAGTCACAAATATCGCA	-18	5'-3'	0|1	80.1924	transcript for ENSG00000186409.10 protein_coding CCDC30
1	43015147	2	ATCGCAGGGCAAGAAGGTCT	-4	5'-3'	0|1	75.9349	transcript for ENSG00000186409.10 protein_coding CCDC30
1	43015147	2	ATGTAGTCACAAATATCGCA	-18	5'-3'	0|1	80.1924	transcript for ENSG00000186409.10 protein_coding CCDC30
1	43015147	2	GATGTAGTCACAAATATCGC	-19	5'-3'	0|1	88.2278	transcript for ENSG00000186409.10 protein_coding CCDC30
1	43284875	1	GTGTGCGCGCGCGCAAGAGA	-1	5'-3'	1|0	81.3267	transcript for ENSG00000164010.9 protein_coding ERMAP
1	43355953	2	GTACAGCAGATAGATCTTAA	-13	3'-5'	0|1	75.5158
1	43410299	1	ATTCTCTGAAAGCGTCAGTC	-12	5'-3'	1|0	86.0229	transcript for ENSG00000117394.15 protein_coding SLC2A1
1	43418056	1	GCTGGAGGAGATTCCCGTAG	-10	5'-3'	0|1	91.0681	transcript for ENSG00000117394.15 protein_coding SLC2A1
1	43418056	2	GGCTGGAGGAGATCCCGTAG	-11	5'-3'	0|1	87.0983	transcript for ENSG00000117394.15 protein_coding SLC2A1
1	43443062	1	GGAGTTCTTACCCGTCTAAA	3	5'-3'	0|1	95.2097	transcript for ENSG00000227533.1 lincRNA SLC2A1-AS1
1	43444224	1	ACAGGCCCGGTCTCTTGTCC	-7	5'-3'	0|1	77.1415	transcript for ENSG00000227533.1 lincRNA SLC2A1-AS1
1	43451368	1	AAAAAGGGCCCAAACCCCCT	-3	3'-5'	0|1	77.7095
1	43504964	1	GGTCCCATTGGCCCCCCGCA	-5	3'-5'	0|1	84.6854
1	43504964	2	ATTGGCCCCCCCGCAGGGAC	-10	3'-5'	0|1	77.1406
1	43504964	2	GGTCCCATTGGCCCCCCCGC	-4	3'-5'	0|1	82.2539
1	43504964	2	GTCCCATTGGCCCCCCCGCA	-5	3'-5'	0|1	86.0608
1	43679181	2	ATAAATATGGGGGGGTGCGG	-14	5'-3'	0|1	77.6226	transcript for ENSG00000117395.6 protein_coding EBNA1BP2
1	43680839	1	GCTTCCCCCCATGCAATCCT	-12	3'-5'	1|0	77.1588	transcript for ENSG00000117395.6 protein_coding EBNA1BP2
1	43680839	1	GGCTTCCCCCCATGCAATCC	-11	3'-5'	1|0	79.0376	transcript for ENSG00000117395.6 protein_coding EBNA1BP2
1	43680839	2	GCTTCCCCCCCATGCAATCC	-11	3'-5'	1|0	75.5951	transcript for ENSG00000117395.6 protein_coding EBNA1BP2
1	43758233	1	CATAACACCAGTTCTTAATC	-20	3'-5'	1|0	76.1988
1	43769750	2	ATGGAGCTAAGCTTGCGGGC	-6	3'-5'	1|0	88.9084	transcript for ENSG00000066056.9 protein_coding TIE1
1	43780653	1	GGAGCAGGCCAGCACAATTC	-18	3'-5'	1|0	75.4721	transcript for ENSG00000066056.9 protein_coding TIE1
1	43824489	1	AGCGGCGGAGCGCGATTTGA	-17	3'-5'	0|1	98.6691
1	43824489	1	CAGCTATCACGAGAGTCTAG	1	3'-5'	0|1	91.5532
1	43824489	1	CTATCACGAGAGTCTAGCGG	-2	3'-5'	0|1	94.7528
1	43824489	1	GCGGCGGAGCGCGATTTGAA	-18	3'-5'	0|1	98.197
1	43824489	2	AGCGCGGAGCGCGATTTGAA	-18	3'-5'	0|1	94.6602
1	43824489	2	GCTATCACGAGAGTCTAGCG	-2	3'-5'	0|1	96.8245
1	43842362	1	GTGCTAGAATGGAAGTATAC	-13	5'-3'	0|1	81.9938
1	43842362	2	GCTAGAATGGAAGTGTATAC	-11	5'-3'	0|1	83.1109
1	44055094	1	CTGGTACTATGTAGTGGTGA	-4	3'-5'	1|0	82.6456	transcript for ENSG00000142949.12 protein_coding PTPRF
1	44055094	2	GGTACTATGTAGTGGTAAGG	-3	3'-5'	1|0	75.822	transcript for ENSG00000142949.12 protein_coding PTPRF
1	44055094	2	GTACTATGTAGTGGTAAGGA	-4	3'-5'	1|0	80.6818	transcript for ENSG00000142949.12 protein_coding PTPRF
1	44068295	2	CTCTGTTCCCACTGCACGGT	-18	5'-3'	1|0	75.8709	transcript for ENSG00000142949.12 protein_coding PTPRF
1	44068295	2	GCAGGGACCAACCGTGCAGT	-11	3'-5'	1|0	83.2174	transcript for ENSG00000142949.12 protein_coding PTPRF
1	44068295	2	GGCAGGGACCAACCGTGCAG	-10	3'-5'	1|0	82.9049	transcript for ENSG00000142949.12 protein_coding PTPRF
1	44114852	2	ATCATTAGGAGCAGCGCTCT	-5	3'-5'	1|0	88.9497
1	44114852	2	CATTAGGAGCAGCGCTCTTG	-7	3'-5'	1|0	83.8528
1	44195619	1	AACAGGCTTTCATACATTAC	-14	3'-5'	1|0	76.7156	transcript for ENSG00000126091.15 protein_coding ST3GAL3
1	44202713	2	ATCAATGTAAGCCCTTCAAC	0	3'-5'	1|0	80.8767	transcript for ENSG00000126091.15 protein_coding ST3GAL3
1	44250785	2	AGGGGGGGTTAGATCCCTCC	1	5'-3'	1|0	82.0402	transcript for ENSG00000126091.15 protein_coding ST3GAL3
1	44275376	1	AAAAGGAAAAGGGCCGAGCG	-3	5'-3'	1|0	77.6281	transcript for ENSG00000126091.15 protein_coding ST3GAL3
1	44275376	1	AGGAAAAGGGCCGAGCGTGG	0	5'-3'	1|0	77.9987	transcript for ENSG00000126091.15 protein_coding ST3GAL3
1	44275376	2	AAAAAGAAAAGGGCCGAGCG	-4	5'-3'	1|0	79.8239	transcript for ENSG00000126091.15 protein_coding ST3GAL3
1	44275376	2	AAGAAAAGGGCCGAGCGTGG	-1	5'-3'	1|0	75.3373	transcript for ENSG00000126091.15 protein_coding ST3GAL3
1	44285324	1	GGATTCTGGGGTAAATGTGC	-6	5'-3'	1|0	76.9494	transcript for ENSG00000126091.15 protein_coding ST3GAL3
1	44302647	1	CGGCAGACAAGGCAATCTCA	-1	3'-5'	1|0	76.5512	transcript for ENSG00000126091.15 protein_coding ST3GAL3
1	44327106	2	GTGGAGCTGCATACAAACCC	-5	5'-3'	1|0	76.1224	transcript for ENSG00000126091.15 protein_coding ST3GAL3
1	44335302	2	GCATGTCAAGAATAGGCTTA	-18	3'-5'	1|0	79.3772	transcript for ENSG00000126091.15 protein_coding ST3GAL3
1	44595995	1	GGCCCCCCGACTTGCCATAC	-1	5'-3'	1|0	93.3675	transcript for ENSG00000171872.4 protein_coding KLF17
1	44596379	2	CTCCATTGTTGTTGGCCTGT	-8	3'-5'	0|1	75.2996	exon for ENSG00000171872.4 protein_coding KLF17
1	44604281	2	ATGCTTCCGGGGCTTTGTAA	-8	5'-3'	0|1	77.6757	transcript for ENSG00000239275.1 pseudogene RP4-675G8.2
1	44989775	1	AGCATCCCCCCATTCACATT	-11	3'-5'	1|0	78.2899	transcript for ENSG00000187147.13 protein_coding RNF220
1	45098296	1	CGGCACTTATTGCCCCCCCA	-4	3'-5'	1|0	87.7225	transcript for ENSG00000187147.13 protein_coding RNF220
1	45098296	2	CGGCACTTATTGCCCCCCAC	-3	3'-5'	1|0	82.2051	transcript for ENSG00000187147.13 protein_coding RNF220
1	45098296	2	CTGTGGGGGGCAATAAGTGC	-2	5'-3'	1|0	93.398	transcript for ENSG00000187147.13 protein_coding RNF220
1	45161216	1	GCCAGTATCTCAATACTTAA	-17	5'-3'	0|1	80.5898	transcript for ENSG00000198520.6 protein_coding C1orf228
1	45161216	2	CGCCAGTATCTCAATACTTA	-18	5'-3'	0|1	89.5644	transcript for ENSG00000198520.6 protein_coding C1orf228
1	45161216	2	GCCAGTATCTCAATACTTAA	-17	5'-3'	0|1	80.5898	transcript for ENSG00000198520.6 protein_coding C1orf228
1	45229986	2	GGCACGCACCTGTTAATCCC	-8	3'-5'	0|1	88.6503	transcript for ENSG00000142945.8 protein_coding KIF2C
1	45229986	2	GTTAATCCCAGGTACGCAGG	-19	3'-5'	0|1	89.9222	transcript for ENSG00000142945.8 protein_coding KIF2C
1	45259462	2	GGTGAAGACAGACGGTATAG	-9	3'-5'	0|1	85.9277
1	45281403	1	AAAAAGTTAGCCGAATGTGA	-12	3'-5'	0|1	75.6725
1	45281403	2	AGTTAGTTAGCCGAATGTGA	-12	3'-5'	0|1	86.7234
1	45416601	2	AGCCTCAAGTGATCCCACCT	-12	5'-3'	0|1	78.7669	transcript for ENSG00000070785.12 protein_coding EIF2B3
1	45422931	2	CAGGTCTTGCCCTGTCGCCT	-21	3'-5'	0|1	76.1299	transcript for ENSG00000070785.12 protein_coding EIF2B3
1	45466877	1	GGGTTCACCACCCAAGGTGC	-8	5'-3'	0|1	80.7085
1	45466877	1	GGTTCACCACCCAAGGTGCA	-7	5'-3'	0|1	79.0958
1	45817509	1	GGAAGACTTTATACTCTCAT	-8	5'-3'	0|1	75.8961	transcript for ENSG00000070759.12 protein_coding TESK2
1	45894476	1	AATTTAAGAGCTGGGCGCAG	-15	3'-5'	1|0	76.3188	transcript for ENSG00000070759.12 protein_coding TESK2
1	45894476	2	GAATTTAGAGCTGGGCGCAG	-15	3'-5'	1|0	77.612	transcript for ENSG00000070759.12 protein_coding TESK2
1	45973435	1	GTGAGACTATTTCACACTGG	-13	3'-5'	0|1	76.6721	transcript for ENSG00000132763.10 protein_coding MMACHC
1	45973435	2	GAGTGAGACTAATTTCACAC	-10	3'-5'	0|1	77.1267	transcript for ENSG00000132763.10 protein_coding MMACHC
1	45976263	1	AACTACGAAAGCCCTACCCA	-5	5'-3'	0|1	84.8027	exon for ENSG00000132763.10 protein_coding MMACHC
1	45976263	2	ACTACTGAAAGCCCTACCCA	-4	5'-3'	0|1	79.041	exon for ENSG00000132763.10 protein_coding MMACHC
1	45983487	1	CTCTCCTCCGGGGTCAAAAC	32	5'-3'	0|1	85.7372	transcript for ENSG00000117450.9 protein_coding PRDX1
1	45983487	1	GTAATATCAACTCTCCTCCG	22	5'-3'	0|1	88.1949	transcript for ENSG00000117450.9 protein_coding PRDX1
1	46008538	1	CAACGAAGTTCAAAGTCCTA	-9	3'-5'	0|1	77.8338
1	46008538	2	ACTTTGAACTTCGGAGCTGA	-2	5'-3'	0|1	79.9836
1	46008538	2	AGCCGTAGGACTTTGAACTT	-11	5'-3'	0|1	82.0198
1	46008538	2	CTCCGAAGTTCAAAGTCCTA	-9	3'-5'	0|1	77.0654
1	46085241	2	ACAGTAACTCATACGGTTGC	-11	5'-3'	0|1	93.3979
1	46224241	2	CGGAGTGAGGTCCCACTCAC	-9	5'-3'	1|0	77.1089
1	46298730	1	GTGAAAGCAGCCGCCACAAA	-6	3'-5'	0|1	79.3507	transcript for ENSG00000086015.16 protein_coding MAST2
1	46318489	1	AGTGATGTGTGACCATACAA	-8	3'-5'	0|1	79.0389	transcript for ENSG00000086015.16 protein_coding MAST2
1	46318489	2	ATGGTCGGTCACACATCACT	-1	5'-3'	0|1	84.0071	transcript for ENSG00000086015.16 protein_coding MAST2
1	46318489	2	ATGTGTGACCGACCATACAA	-8	3'-5'	0|1	90.5327	transcript for ENSG00000086015.16 protein_coding MAST2
1	46318489	2	GTAGTATTCCATTGTATGGT	-16	5'-3'	0|1	83.0556	transcript for ENSG00000086015.16 protein_coding MAST2
1	46392112	1	CTGCAGTATGGACATATGGT	-13	3'-5'	0|1	78.6918	transcript for ENSG00000086015.16 protein_coding MAST2
1	46392112	1	GTAATGGAGCTTCTGCAGTA	-1	3'-5'	0|1	77.1077	transcript for ENSG00000086015.16 protein_coding MAST2
1	46455423	2	GTCCCTCATCATCTTCCCGC	-11	5'-3'	0|1	80.9175	transcript for ENSG00000086015.16 protein_coding MAST2
1	46545560	2	CTTACTGCAACTCCGCCTCT	-11	3'-5'	1|0	84.0881	transcript for ENSG00000117461.10 protein_coding PIK3R3
1	46804097	2	ACACCTAATCAACAGCACTT	-9	5'-3'	0|1	75.6468
1	46804097	2	CACCTAATCAACAGCACTTT	-8	5'-3'	0|1	75.0564
1	46804097	2	CTCCCAAAGTGCTGTTGATT	-6	3'-5'	0|1	76.6544
1	46910400	1	CGAAATCCAAACGTCCTTGT	1	3'-5'	1|0	91.1459	transcript for ENSG00000232022.2 pseudogene RP5-1109J22.1
1	47065631	1	GGAGAAGAAGTAAGCCGAAT	-12	3'-5'	1|0	85.3705	transcript for ENSG00000079277.15 protein_coding MKNK1
1	47070810	1	AATCCTGCGGTCCAACCTGA	-10	5'-3'	1|0	78.319	transcript for ENSG00000079277.15 protein_coding MKNK1
1	47070810	1	ATACATCGGGGCCCTCAGGT	1	3'-5'	1|0	97.5022	transcript for ENSG00000079277.15 protein_coding MKNK1
1	47070810	1	CAGGATACATCGGGGCCCTC	5	3'-5'	1|0	77.8554	transcript for ENSG00000079277.15 protein_coding MKNK1
1	47070810	1	GAATCCTGCGGTCCAACCTG	-11	5'-3'	1|0	80.2934	transcript for ENSG00000079277.15 protein_coding MKNK1
1	47070810	1	GGAGAAGTCAGGATACATCG	13	3'-5'	1|0	84.2947	transcript for ENSG00000079277.15 protein_coding MKNK1
1	47070810	2	CGGACCGCAGGATTCCAGAA	-19	3'-5'	1|0	78.5125	transcript for ENSG00000079277.15 protein_coding MKNK1
1	47070810	2	GTCAGGATACATCGGACCGC	-7	3'-5'	1|0	89.2224	transcript for ENSG00000079277.15 protein_coding MKNK1
1	47074774	1	GATTGGGACCATCAGACCAT	15	3'-5'	1|2	81.3647	transcript for ENSG00000079277.15 protein_coding MKNK1
1	47074774	2	CTACAGTGGTCATGGTCTGA	-9	5'-3'	1|2	75.6427	transcript for ENSG00000079277.15 protein_coding MKNK1
1	47209936	1	GTGACGTGTATCACATCTGA	-4	5'-3'	1|0	84.4814
1	47734663	1	CTCCTGCCTCCCGTGTAGCT	-12	3'-5'	1|0	79.1341	transcript for ENSG00000123473.11 protein_coding STIL
1	47779259	2	GTGAAACCTCCCAGACACCG	-6	5'-3'	0|1	78.1878	transcript for ENSG00000123473.11 protein_coding STIL
1	47835699	2	CTGTCAGCCTTCCGAGTAGC	-2	5'-3'	1|0	83.5533	transcript for ENSG00000162368.9 protein_coding CMPK1
1	47849934	2	CAGGCTACTGGTCTAGGTAT	-16	3'-5'	0|1	88.2497	transcript for ENSG00000225762.1 antisense RP11-511I2.2
1	47849934	2	GCCTACTATGTGCAGGCTAC	-4	3'-5'	0|1	75.9442	transcript for ENSG00000225762.1 antisense RP11-511I2.2
1	47849935	2	CTAGACCAGTGGCACATAGT	-10	5'-3'	0|1	78.8377	transcript for ENSG00000225762.1 antisense RP11-511I2.2
1	47961173	2	ATAAAGTTAATGGCACCCCC	-8	5'-3'	1|0	80.6418
1	48027606	1	CAGCAGGGACATCATAGTCC	-3	5'-3'	1|0	88.2968
1	48027606	2	GCAGCGGGACATCATAGTCC	-4	5'-3'	1|0	75.2682
1	48054084	2	ACACACACCACCCGCAATTC	-14	3'-5'	0|1	89.1307
1	48221344	2	ACTTGGAAGGTGGTACTTAC	-1	3'-5'	0|1	82.417
1	48221344	2	AGGTGGTACTTACTGGTAGG	-8	3'-5'	0|1	78.4646
1	48508285	1	CTCTAGGGATCTATCTGTTC	-6	3'-5'	1|0	78.6502
1	48510122	1	CAGTAGTATTGACACTCAGA	-7	5'-3'	1|0	77.6946
1	48837736	2	GGTGCCGGGGTGGAATGATA	-16	3'-5'	1|0	83.2522	transcript for ENSG00000132122.7 protein_coding SPATA6
1	49013910	2	ACTTAATGCTGCGATCTTCT	-1	3'-5'	0|1	83.9862	transcript for ENSG00000186094.12 protein_coding AGBL4
1	49094641	1	GATTGTAAGCTTCTCCCGAC	-18	5'-3'	1|0	78.3441	transcript for ENSG00000186094.12 protein_coding AGBL4
1	49094641	2	GATTAATAGGGCAGAGTCCC	1	3'-5'	1|0	93.3843	transcript for ENSG00000186094.12 protein_coding AGBL4
1	49109455	1	AAAAGAAGCAGAGCCCGTTT	-8	5'-3'	1|0	79.0787	transcript for ENSG00000186094.12 protein_coding AGBL4
1	49109455	1	GAAAAGAAGCAGAGCCCGTT	-9	5'-3'	1|0	79.9734	transcript for ENSG00000186094.12 protein_coding AGBL4
1	49124365	2	GGAAGCTGTTTGGGATAGCG	-18	5'-3'	1|0	83.0103	transcript for ENSG00000186094.12 protein_coding AGBL4
1	49124886	1	AGACAGTTGTAGGTCAATGG	-14	3'-5'	1|0	78.76	transcript for ENSG00000186094.12 protein_coding AGBL4
1	50862738	2	ATAAACCATAGTCAGGCCCT	-1	5'-3'	1|0	76.6393
1	50862738	2	GGGGAAGATAAACCATAGTC	-8	5'-3'	1|0	78.8413
1	51742123	2	ACTGAGTCACTATGTTGCCC	-5	5'-3'	0|1	75.859
1	52183961	1	GATCTACTTGATAACACAAC	-11	5'-3'	1|0	79.3303	transcript for ENSG00000117859.14 protein_coding OSBPL9
1	52655741	1	ATGATCACGGGTGTTATACT	-6	3'-5'	0|1	82.4757	transcript for ENSG00000157077.10 protein_coding ZFYVE9
1	52655741	1	CATGATCACGGGTGTTATAC	-5	3'-5'	0|1	90.5991	transcript for ENSG00000157077.10 protein_coding ZFYVE9
1	52655741	2	ATCACGGGTGTTAGTTATAC	-5	3'-5'	0|1	95.5188	transcript for ENSG00000157077.10 protein_coding ZFYVE9
1	53561482	2	GTGTGTGAGTGTACAAGTCG	-8	3'-5'	0|1	86.0149	transcript for ENSG00000162383.7 protein_coding SLC1A7
1	54012621	2	GTCAGCCTTCCATACCAGTC	-6	3'-5'	1|0	86.1409	transcript for ENSG00000174332.3 protein_coding GLIS1
1	54019417	2	AGGAGTACCCCTAAGCTTTA	-4	5'-3'	1|0	82.0857	transcript for ENSG00000174332.3 protein_coding GLIS1
1	54019417	2	CAGGAGTACCCCTAAGCTTT	-5	5'-3'	1|0	81.3219	transcript for ENSG00000174332.3 protein_coding GLIS1
1	54019417	2	GCTTAGGGGTACTCCTGAGA	-11	3'-5'	1|0	79.2466	transcript for ENSG00000174332.3 protein_coding GLIS1
1	54019417	2	GTACCCCTAAGCTTTAGGGA	0	5'-3'	1|0	81.0833	transcript for ENSG00000174332.3 protein_coding GLIS1
1	54019422	2	CTTCTCAGGAGCTACCTTAG	-15	5'-3'	1|0	79.9291	transcript for ENSG00000174332.3 protein_coding GLIS1
1	54019422	2	GGTAGCCTAAGCTTTAGGGA	6	5'-3'	1|0	78.7476	transcript for ENSG00000174332.3 protein_coding GLIS1
1	54052647	2	GTGTTGCGCTGGTGTAACAG	-11	3'-5'	1|0	88.5957	transcript for ENSG00000174332.3 protein_coding GLIS1
1	54231850	2	GGCAAAAACCTAAACCTAGC	-10	5'-3'	1|0	77.4912	transcript for ENSG00000058804.10 protein_coding NDC1
1	54239402	2	CTGACTACAGGCTGACTACA	1	5'-3'	1|0	79.9739	transcript for ENSG00000058804.10 protein_coding NDC1
1	54266188	1	AGAGTTTCACCATGTGGGTC	1	5'-3'	1|0	79.0166	transcript for ENSG00000058804.10 protein_coding NDC1
1	54266188	2	ACAGTTTCACCATGTGGGTC	-1	5'-3'	1|0	78.5482	transcript for ENSG00000058804.10 protein_coding NDC1
1	54315148	1	AAACCCGTGCCTGATCTTTC	-11	3'-5'	0|1	80.4382
1	54315148	2	AAAACCCGTGCTGATCTTTC	-11	3'-5'	0|1	79.0169
1	54348462	2	CAAGGACGCATCAATATCTC	-6	5'-3'	1|0	78.3299	transcript for ENSG00000058799.9 protein_coding YIPF1
1	54689853	1	GTATCAATGGTGCTGACCCA	-20	3'-5'	0|1	75.3938	transcript for ENSG00000116221.11 protein_coding MRPL37
1	54689853	2	GCTGCGACTAACCTGATCAA	-7	3'-5'	0|1	92.4979	transcript for ENSG00000116221.11 protein_coding MRPL37
1	54690596	1	CAAGGGCTCCCAGTACACCT	-13	5'-3'	0|1	78.3715	transcript for ENSG00000116221.11 protein_coding MRPL37
1	54690596	1	CTAAACCTCCAAGGTGTACT	-5	3'-5'	0|1	85.2936	transcript for ENSG00000116221.11 protein_coding MRPL37
1	54690639	2	CTGCTGTTGGCGACTGTTGG	1	3'-5'	0|1	81.5313	transcript for ENSG00000116221.11 protein_coding MRPL37
1	54690639	2	GCCTGCTGTTGGCGACTGTT	3	3'-5'	0|1	88.0009	transcript for ENSG00000116221.11 protein_coding MRPL37
1	54737286	1	GCCTCCCTGACGGCCGAGCT	-10	5'-3'	0|1	79.6158	transcript for ENSG00000157216.11 protein_coding SSBP3
1	54737286	1	GGGCACCCAGCTCGGCCGTC	-5	3'-5'	0|1	85.8999	transcript for ENSG00000157216.11 protein_coding SSBP3
1	54737286	2	CGGCCTCCCTGACGCCGAGC	-12	5'-3'	0|1	81.6165	transcript for ENSG00000157216.11 protein_coding SSBP3
1	54737286	2	GGCCTCCCTGACGCCGAGCT	-11	5'-3'	0|1	77.547	transcript for ENSG00000157216.11 protein_coding SSBP3
1	54757161	1	CGTGTGGCAACTGTGCGCTG	-16	3'-5'	0|1	84.3503	transcript for ENSG00000157216.11 protein_coding SSBP3
1	54757161	2	AGCGCACAGTTGCCACACAC	-12	5'-3'	0|1	77.3841	transcript for ENSG00000157216.11 protein_coding SSBP3
1	54757161	2	CGTGTGTGGCAACTGTGCGC	-14	3'-5'	0|1	84.621	transcript for ENSG00000157216.11 protein_coding SSBP3
1	55049962	2	GAGTCGCCCTCTATGCAGGG	-14	3'-5'	0|1	79.1894	transcript for ENSG00000162390.13 protein_coding ACOT11
1	55049965	2	GAAAGAGTCCCTCTCTATGC	-13	3'-5'	0|1	75.4474	transcript for ENSG00000162390.13 protein_coding ACOT11
1	55051991	1	GCCAAGGCACCTTGTCTAGG	-4	3'-5'	0|1	80.6368	transcript for ENSG00000162390.13 protein_coding ACOT11
1	55051991	2	CTTTGCCAAGGCACCTTGTC	-1	3'-5'	0|1	79.2138	transcript for ENSG00000162390.13 protein_coding ACOT11
1	55076137	1	ACATTCAGACCGTCATCCCC	7	5'-3'	0|1	84.7324	transcript for ENSG00000162390.13 protein_coding ACOT11
1	55080745	1	ATGGGAACTCCTCTAGAGGC	-8	3'-5'	1|0	81.8711	transcript for ENSG00000162390.13 protein_coding ACOT11
1	55080745	1	GGAGATGGGAACTCCTCTAG	-4	3'-5'	1|0	76.7287	transcript for ENSG00000162390.13 protein_coding ACOT11
1	55107508	1	GGTGGTAACTCCCTTGTGGG	-2	3'-5'	0|1	79.3739	exon for ENSG00000271723.1 protein_coding MROH7-TTC4
1	55107508	2	AGGTGGTAACTCCCTTGTGG	-2	3'-5'	0|1	78.0684	exon for ENSG00000271723.1 protein_coding MROH7-TTC4
1	55151205	1	AGAAGGGCAATACTAGGGGG	-2	3'-5'	1|0	85.1698	transcript for ENSG00000271723.1 protein_coding MROH7-TTC4
1	55151205	1	GAAGGGCAATACTAGGGGGT	-3	3'-5'	1|0	78.4305	transcript for ENSG00000271723.1 protein_coding MROH7-TTC4
1	55151205	2	AAGGGCAATACTAGGGGGGT	-3	3'-5'	1|0	75.6982	transcript for ENSG00000271723.1 protein_coding MROH7-TTC4
1	55151205	2	GCAGAAGGGCAATACTAGGG	1	3'-5'	1|0	77.3961	transcript for ENSG00000271723.1 protein_coding MROH7-TTC4
1	55259339	2	GTAACAGTCTCGACTGAACC	-15	5'-3'	0|1	92.2543	transcript for ENSG00000006555.6 protein_coding TTC22
1	55522741	2	GAGATAGACCGGAAACTATT	-11	3'-5'	0|1	78.0514	transcript for ENSG00000169174.9 protein_coding PCSK9
1	55556885	2	GTGCGGGCCCTGTTCCTAAC	-15	3'-5'	0|1	88.7341	transcript for ENSG00000162402.8 protein_coding USP24
1	56023715	2	CTGTGTTTGTCATAGCACAC	-17	3'-5'	1|0	79.5763
1	56170541	1	GGGAACGCAGTACTCCTTGG	-17	5'-3'	1|0	83.419	transcript for ENSG00000234810.1 lincRNA RP11-466L17.1
1	56252985	2	GTCTAACAACATACTAGATC	-17	3'-5'	0|1	83.2265
1	56546507	2	AGTTTGAGCATGCATAGAGT	-6	3'-5'	0|1	77.7648
1	56732215	2	ACGACTCGATGATTAAGGTC	-6	5'-3'	1|0	93.9474
1	56897373	2	GAATTTCATCAGGGCTAATA	-10	5'-3'	1|0	77.0168
1	56912610	2	AGGGGGTGTCAAACCCAAAA	-1	3'-5'	1|0	77.884
1	56999273	1	AACCTCCCAGGATTACTACC	-12	5'-3'	0|1	85.7126	transcript for ENSG00000162407.8 protein_coding PPAP2B
1	56999273	2	CACCTGGTAGTAGTAATCCT	-7	3'-5'	0|1	86.0569	transcript for ENSG00000162407.8 protein_coding PPAP2B
1	56999273	2	CTCCCAGGATTACTACTACC	-9	5'-3'	0|1	86.5915	transcript for ENSG00000162407.8 protein_coding PPAP2B
1	56999273	2	CTGGTAGTAGTAATCCTGGG	-10	3'-5'	0|1	80.3103	transcript for ENSG00000162407.8 protein_coding PPAP2B
1	56999273	2	GCACCTGGTAGTAGTAATCC	-6	3'-5'	0|1	89.9094	transcript for ENSG00000162407.8 protein_coding PPAP2B
1	57020935	1	GGGACAGATAAAAGTCCCCG	1	3'-5'	0|1	78.7342	transcript for ENSG00000162407.8 protein_coding PPAP2B
1	57045755	2	CACGACTGTGGAACATCTCC	-11	5'-3'	0|1	77.8281	transcript for ENSG00000162407.8 protein_coding PPAP2B
1	57651206	2	AGAATGGGGACAAACCTCAC	-4	5'-3'	1|0	75.7316	transcript for ENSG00000173406.11 protein_coding DAB1
1	57852664	2	CGAGAGTCCTGTAAGGGAGC	-21	3'-5'	0|1	79.6003	transcript for ENSG00000173406.11 protein_coding DAB1
1	58380836	1	ACTGGAAGGAAATACCCGGA	-16	5'-3'	1|0	85.2729	transcript for ENSG00000173406.11 protein_coding DAB1
1	58712938	1	ATTTATTTAACCTGGCGGGG	-6	3'-5'	0|1	89.4577	transcript for ENSG00000173406.11 protein_coding DAB1
1	58722409	2	AGCCCCAAAAGTCTATAGAC	-9	5'-3'	1|0	80.8761	transcript for ENSG00000173406.11 protein_coding DAB1
1	58975816	1	ATAGGTATCAGGGTAATGGC	-3	3'-5'	0|1	84.4436	transcript for ENSG00000173406.11 protein_coding DAB1
1	58975816	2	CATAGGTATCAGGGTAATGC	-3	3'-5'	0|1	85.343	transcript for ENSG00000173406.11 protein_coding DAB1
1	58984298	2	AACGAATATCTAAACCCTGG	-9	5'-3'	0|1	82.8152	transcript for ENSG00000173406.11 protein_coding DAB1
1	58984298	2	AAGAACGAATATCTAAACCC	-12	5'-3'	0|1	80.0606	transcript for ENSG00000173406.11 protein_coding DAB1
1	59014598	2	GGAATGCACACTGGCGTGAG	-11	3'-5'	1|0	83.8927
1	59014598	2	GGGAATGCACACTGGCGTGA	-10	3'-5'	1|0	85.209
1	59014598	2	GGGGAATGCACACTGGCGTG	-9	3'-5'	1|0	82.4702
1	59049820	1	CTGAGCCAAGTCTCGTGACT	-4	5'-3'	0|1	91.991
1	59049820	2	ATGTCCCAGTCACGAGACTT	1	3'-5'	0|1	87.7093
1	59049820	2	CTGAGCCCAAGTCTCGTGAC	-4	5'-3'	0|1	91.6525
1	59101436	2	CTTAGACTGCACACAGCTAG	-4	3'-5'	0|1	76.5891
1	59104181	1	ACACTGTCATTAGCCCTAAG	-15	3'-5'	0|1	81.3046
1	59104181	1	GACACTGTCATTAGCCCTAA	-14	3'-5'	0|1	81.766
1	59104181	1	GGACACTGTCATTAGCCCTA	-13	3'-5'	0|1	85.1377
1	59104181	2	GACACTGCATTAGCCCTAAG	-15	3'-5'	0|1	75.6802
1	59104181	2	GGACACTGCATTAGCCCTAA	-14	3'-5'	0|1	84.827
1	59104181	2	GGGACACTGCATTAGCCCTA	-13	3'-5'	0|1	86.8387
1	59117160	1	GAGGGGTGCATCGTAAGTAA	-11	5'-3'	0|1	92.4083
1	59117160	2	CTAGAGAGGGGTGCATCGTA	-16	5'-3'	0|1	92.6028
1	59162923	1	GTACAGTGAAGAGATCTGGT	-10	5'-3'	1|0	75.6448	transcript for ENSG00000162601.5 protein_coding MYSM1
1	59173613	1	ACACACATGACAGTCTGGTG	-14	3'-5'	0|1	75.1389
1	59173613	2	ACACACACGACAGTCTGGTG	-14	3'-5'	0|1	80.9073
1	59173613	2	CACACACGACAGTCTGGTGT	-15	3'-5'	0|1	83.6872
1	59268948	1	GAACCTGTAATTACTATCCT	-1	3'-5'	1|0	77.7172	transcript for ENSG00000234807.4 lincRNA RP4-794H19.2
1	59268948	2	GTCCAAAGGATAGTAATTAC	-3	5'-3'	1|0	77.907	transcript for ENSG00000234807.4 lincRNA RP4-794H19.2
1	59319761	1	AGCCACATGGAGCGCTTAGG	-17	5'-3'	0|1	87.4101	transcript for ENSG00000234807.4 lincRNA RP4-794H19.2
1	59319761	1	CTGAGCCACATGGAGCGCTT	-20	5'-3'	0|1	81.4182	transcript for ENSG00000234807.4 lincRNA RP4-794H19.2
1	59319761	1	GCCACATGGAGCGCTTAGGT	-16	5'-3'	0|1	90.3795	transcript for ENSG00000234807.4 lincRNA RP4-794H19.2
1	59319761	2	GAGCCACATGGAGCGCTTAG	-18	5'-3'	0|1	90.6651	transcript for ENSG00000234807.4 lincRNA RP4-794H19.2
1	59357391	1	AGTGCTATGGATGGTCCCCC	-14	5'-3'	1|0	85.0666	transcript for ENSG00000234807.4 lincRNA RP4-794H19.2
1	59357391	1	GTGCTATGGATGGTCCCCCT	-13	5'-3'	1|0	82.8729	transcript for ENSG00000234807.4 lincRNA RP4-794H19.2
1	59357391	2	AGTGCTATGGATGGTCCCCT	-14	5'-3'	1|0	79.8608	transcript for ENSG00000234807.4 lincRNA RP4-794H19.2
1	59443023	1	CAAATAATTATTGGGCACCA	-12	3'-5'	0|1	76.1381
1	59467623	1	AATCAGATAGTGGCCACATC	-5	5'-3'	0|1	75.2734
1	59467623	2	ATCAGAATAGTGGCCACATC	-4	5'-3'	0|1	76.035
1	59480351	1	AGATGCTATGGCACCATAGG	-9	3'-5'	0|1	81.0185
1	59480351	1	GTGAGATGCTATGGCACCAT	-6	3'-5'	0|1	77.786
1	59480351	2	GTGCTACCACCTATGGCTCC	-15	5'-3'	0|1	80.7473
1	59591782	1	AATTTCAGGTGCCCCCCCAA	-4	3'-5'	1|0	87.2524
1	59625389	1	ATCCAGAGGACACTCTGTCG	-6	3'-5'	1|0	82.1915	transcript for ENSG00000224609.2 processed_transcript RP11-470E16.1
1	59625389	1	CACCACGACAGAGTGTCCTC	-8	5'-3'	1|0	81.4217	transcript for ENSG00000224609.2 processed_transcript RP11-470E16.1
1	59625389	2	GAATCCAGAGGACACTGTCG	-6	3'-5'	1|0	80.9216	transcript for ENSG00000224609.2 processed_transcript RP11-470E16.1
1	60227848	2	GTTCACTGCAACCTCCGCCC	-16	5'-3'	0|1	81.4551	transcript for ENSG00000172456.12 protein_coding FGGY
1	60447377	1	GTTCACTGAACCTAAGGCAA	-4	3'-5'	0|1	77.0126
1	60584956	1	GTCTTGGCCCTCAAAGTGTT	-8	5'-3'	0|1	78.5141	transcript for ENSG00000238242.1 lincRNA RP11-575B7.3
1	60597751	1	ATAGACAAGATAGTCAGATC	-10	5'-3'	0|1	76.1953	transcript for ENSG00000238242.1 lincRNA RP11-575B7.3
1	60886811	1	ACCTCACCTTGCCCTTATAT	-13	3'-5'	1|0	86.4387
1	60886811	2	AAGGCACCTTGCCCTTATAT	-13	3'-5'	1|0	84.8893
1	60886811	2	AGGCACCTTGCCCTTATATT	-14	3'-5'	1|0	83.017
1	61480903	2	GTAATCCTAGCTAAGGTGGG	-11	3'-5'	0|1	80.3709	transcript for ENSG00000162599.11 protein_coding NFIA
1	61537429	2	GTATCTCACTCTTATTGCCC	-1	5'-3'	1|0	75.6195	transcript for ENSG00000162599.11 protein_coding NFIA
1	61589377	1	GGGGGGAAGGCTACATGGTT	-15	5'-3'	0|1	78.5712	transcript for ENSG00000162599.11 protein_coding NFIA
1	61589377	2	GGGGGAAGGCTACATGGGTT	-14	5'-3'	0|1	75.8005	transcript for ENSG00000162599.11 protein_coding NFIA
1	61756511	2	CAGTGCAGCTTTATATAAGG	1	3'-5'	1|0	77.0596	transcript for ENSG00000162599.11 protein_coding NFIA
1	61820685	2	ACACTCAGGATCCTAAGTTA	-9	5'-3'	0|1	78.6018	transcript for ENSG00000162599.11 protein_coding NFIA
1	61845295	2	ATCGACCATCCTGGCCAACA	-17	3'-5'	0|1	76.728	transcript for ENSG00000162599.11 protein_coding NFIA
1	61845295	2	GGTCAAGAGATCGACCATCC	-8	3'-5'	0|1	93.673	transcript for ENSG00000162599.11 protein_coding NFIA
1	61915353	1	AAAGGTGCCGGGGCCAATCC	-6	5'-3'	0|1	81.4889	transcript for ENSG00000162599.11 protein_coding NFIA
1	61915353	1	ATAAGGCCACAAAGGTGCCG	-16	5'-3'	0|1	85.4801	transcript for ENSG00000162599.11 protein_coding NFIA
1	61915353	1	GATTGGCCCCGGCACCTTTG	-10	3'-5'	0|1	82.2967	transcript for ENSG00000162599.11 protein_coding NFIA
1	61942781	2	CATTCTCCATGGATAAGGGG	0	3'-5'	1|0	79.4344
1	61944973	1	AGTCTAGAATCCCCGCACTT	-9	3'-5'	2|1	94.3025
1	61944973	1	GTCTAGAATCCCCGCACTTT	-10	3'-5'	2|1	88.0545
1	62098556	2	CTCTGTAAACATTAGCCAAC	-10	5'-3'	0|1	79.5955
1	62100536	2	GTCTCGCTACGTTGCTAGGC	-7	3'-5'	0|1	96.6501
1	62297985	2	AGGTTCGGGGGTATGTGTGC	-16	3'-5'	0|1	80.0783	transcript for ENSG00000132849.14 protein_coding INADL
1	62477841	1	GATGGTCACTCTACCATCTT	-20	3'-5'	0|1	83.8291	transcript for ENSG00000132849.14 protein_coding INADL
1	62642593	2	ACTCAGTGGAGGTCCCAACG	-18	3'-5'	1|0	88.4173
1	62848694	2	GATGTAACCATCATGGTCAG	-17	5'-3'	1|0	75.5963
1	63070537	1	GTTAATGTGGTCTAATAATC	1	5'-3'	0|1	77.1493	transcript for ENSG00000116641.11 protein_coding DOCK7
1	63106174	2	GAGACGGGGTCTTTGTTGCC	-9	3'-5'	0|1	77.7004	transcript for ENSG00000116641.11 protein_coding DOCK7
1	63108680	2	GAGTGGAAGCTGTAAGACCT	-2	3'-5'	0|1	76.7423	transcript for ENSG00000116641.11 protein_coding DOCK7
1	63249303	1	CTCTAAGCCAAGCCATTATT	-1	3'-5'	0|1	76.275
1	63249303	2	AGCCAAGCCATTAGGACTGT	-9	3'-5'	0|1	78.8453
1	63402166	2	GCCCAACTTCATTAGAGGTG	-10	5'-3'	1|0	84.1448
1	64035264	1	GTAAGGCGAAACAAGGCGAA	0	5'-3'	0|1	84.4949	transcript for ENSG00000142856.12 protein_coding ITGB3BP
1	64035264	2	GTTAAGGCGAAACAAGGCGA	0	5'-3'	0|1	90.3557	transcript for ENSG00000142856.12 protein_coding ITGB3BP
1	64208103	1	GTGGATTCCTTTAGGTAGTA	0	3'-5'	2|1	82.2714
1	64209144	1	GACCCATAGGATAGGGCATT	-14	3'-5'	1|0	79.6853
1	64209144	2	ACCCATAAGGATAGGGCATT	-14	3'-5'	1|0	82.1823
1	64215591	1	CAAACTGGGACTTATACCAG	-3	5'-3'	0|1	81.5138
1	64215591	1	CAGTTTGAAGACCCGCAACC	-19	3'-5'	0|1	91.4953
1	64215591	1	CTGGTTGCGGGTCTTCAAAC	-18	5'-3'	0|1	85.9725
1	64215591	2	GAGTTTGAAGACCCGCAACC	-19	3'-5'	0|1	93.7707
1	64215591	2	GGTTGCGGGTCTTCAAACTC	-16	5'-3'	0|1	84.6792
1	64215591	2	GTTGCGGGTCTTCAAACTCT	-15	5'-3'	0|1	80.1035
1	64224560	1	ACATTCTGTAACATGCCGGA	-4	5'-3'	1|0	75.4059
1	64224560	2	AGCAATGTAGATATGCAGTC	-19	3'-5'	1|0	88.963
1	64224560	2	CATTGCTGTAACATGCCGGA	-3	5'-3'	1|0	86.1462
1	64501235	1	AAAGAGACTCTGGCGTAACC	-14	3'-5'	0|1	92.9772	transcript for ENSG00000185483.7 protein_coding ROR1
1	64501235	1	AAGAGACTCTGGCGTAACCT	-15	3'-5'	0|1	91.9672	transcript for ENSG00000185483.7 protein_coding ROR1
1	64501235	2	AAAGAGATCTGGCGTAACCT	-15	3'-5'	0|1	92.02	transcript for ENSG00000185483.7 protein_coding ROR1
1	64501235	2	GAAAGAGATCTGGCGTAACC	-14	3'-5'	0|1	93.2704	transcript for ENSG00000185483.7 protein_coding ROR1
1	64501235	2	GATCTGGCGTAACCTGGGCC	-20	3'-5'	0|1	78.8537	transcript for ENSG00000185483.7 protein_coding ROR1
1	64644762	2	ACTCGTGCATGACATGGCAT	-3	5'-3'	0|1	80.7956	exon for ENSG00000185483.7 protein_coding ROR1
1	64644762	2	CTCGTGCATGACATGGCATT	-2	5'-3'	0|1	79.7514	exon for ENSG00000185483.7 protein_coding ROR1
1	64651194	1	ATGACATTCCAGTCAACAAC	-3	3'-5'	0|1	75.003
1	64681539	1	AGGTAGTAGAGCACTGCTTC	-16	5'-3'	0|1	78.2602	transcript for ENSG00000177414.9 protein_coding UBE2U
1	64681539	2	CAGAGCAGTGCTCTACTACC	-18	3'-5'	0|1	78.9005	transcript for ENSG00000177414.9 protein_coding UBE2U
1	64728725	1	GGTGAAAACCCATGATAAGT	-3	5'-3'	0|1	78.5896	transcript for ENSG00000177414.9 protein_coding UBE2U
1	64761666	1	AAAAGTCCTGATCAATTGTC	-9	3'-5'	0|1	80.5009
1	64761666	2	AAAGTCCTGATCCAATTGTC	-9	3'-5'	0|1	78.639
1	64761666	2	ACTGACTTGAACCTGACAAT	-20	5'-3'	0|1	76.1801
1	64807312	1	ATGTGGTCCTACCAAACTGG	-17	3'-5'	1|0	78.0538
1	64807312	1	ATTATGTGGTCCTACCAAAC	-14	3'-5'	1|0	86.4751
1	64807312	2	AATTATGGTCCTACCAAACT	-15	3'-5'	1|0	78.7775
1	64807312	2	GAATTATGGTCCTACCAAAC	-14	3'-5'	1|0	87.0323
1	64823546	1	AAACCGGTCTTGCATTCTAC	1	5'-3'	1|0	82.6365
1	64898879	1	ACTTACTAGTGTGGTGACAT	1	5'-3'	1|0	82.0138
1	64898879	1	CACTTACTAGTGTGGTGACA	0	5'-3'	1|0	78.2955
1	64898879	2	ACTCACTAGTGTGGTGACAT	-3	5'-3'	1|0	79.1158
1	64909546	1	ATGGAAGCCATGTGTCTCGT	-4	3'-5'	0|1	85.9966
1	65294778	1	GTGAATGGTGTTAGCACCAT	-9	5'-3'	1|0	81.0454	transcript for ENSG00000162437.10 protein_coding RAVER2
1	65294778	2	GTGAATGGTGTAGCACCATT	-9	5'-3'	1|0	79.4245	transcript for ENSG00000162437.10 protein_coding RAVER2
1	65719399	1	ACCCCTCCAGTAATACTCGT	-17	3'-5'	1|0	89.9368	transcript for ENSG00000116675.11 protein_coding DNAJC6
1	65719399	2	AACCCTCCAGTAATACTCGT	-17	3'-5'	1|0	92.76	transcript for ENSG00000116675.11 protein_coding DNAJC6
1	65719399	2	ACCCTCCAGTAATACTCGTG	-18	3'-5'	1|0	93.1784	transcript for ENSG00000116675.11 protein_coding DNAJC6
1	65827847	1	GCATACAAGCTAGTGAACCC	-5	3'-5'	1|0	88.0929	transcript for ENSG00000116675.11 protein_coding DNAJC6
1	65834062	1	GAGCACATGCCTATCCCTAT	-3	3'-5'	1|0	82.6354	transcript for ENSG00000116675.11 protein_coding DNAJC6
1	65834062	2	AGCACATGCCTATCCCTAGT	-3	3'-5'	1|0	86.9068	transcript for ENSG00000116675.11 protein_coding DNAJC6
1	65834062	2	CATATGCTCCAACTAGGGAT	-11	5'-3'	1|0	86.1901	transcript for ENSG00000116675.11 protein_coding DNAJC6
1	65991826	2	CAAAGTAGGCACGAAGCCTC	-1	3'-5'	0|1	80.2637	transcript for ENSG00000116678.14 protein_coding LEPR
1	65991826	2	CGGAAAAGAAGTTGGCCGGG	-21	3'-5'	0|1	81.4477	transcript for ENSG00000116678.14 protein_coding LEPR
1	65991826	2	CGGAGGCTTCGTGCCTACTT	0	5'-3'	0|1	88.5457	transcript for ENSG00000116678.14 protein_coding LEPR
1	65991826	2	CTCCGGAAAAGAAGTTGGCC	-18	3'-5'	0|1	75.6778	transcript for ENSG00000116678.14 protein_coding LEPR
1	66209209	1	AGCCTACACTGGTAATACCC	-20	3'-5'	0|1	89.2315
1	66209209	2	CACCTACACTGGTAATACCC	-20	3'-5'	0|1	89.5855
1	66256227	2	CACTTTGATACTTCTAGTGC	-4	5'-3'	0|1	81.0099
1	66706507	2	CTAATCTTAGGGGGTACCTC	-7	5'-3'	1|0	93.0028	transcript for ENSG00000184588.13 protein_coding PDE4B
1	66708437	2	AGCCTTATTCATAAGCCGGG	-5	3'-5'	1|0	78.1166	transcript for ENSG00000184588.13 protein_coding PDE4B
1	66729482	2	ACCTTTGATGGTAGATTGTT	-8	5'-3'	1|0	79.4761	transcript for ENSG00000184588.13 protein_coding PDE4B
1	67520059	1	CGACTGTCACCCGGAGTCTG	0	3'-5'	1|0	87.83
1	67520059	1	GGAGTCTGTGGTTTGTCGCC	-12	3'-5'	1|0	91.485
1	67520059	2	CGGGCGACAAACCAGACTCC	-11	5'-3'	1|0	83.9106
1	67520059	2	GGCGACTGTCACCCGGAGTC	0	3'-5'	1|0	88.9036
1	67522306	1	ACACATACAGACCGTAGCAA	-5	5'-3'	1|0	83.5215
1	67522306	1	ACATACAGACCGTAGCAAAG	-3	5'-3'	1|0	88.5515
1	67522306	1	CACATACAGACCGTAGCAAA	-4	5'-3'	1|0	88.4188
1	67522306	2	AGGACACATACCGTAGCAAA	-8	5'-3'	1|0	84.9029
1	67522306	2	GAGGACACATACCGTAGCAA	-9	5'-3'	1|0	85.9136
1	67522306	2	GGACACATACCGTAGCAAAG	-7	5'-3'	1|0	86.4493
1	67563430	1	CAATGGAGTAACCAATTAGG	-8	5'-3'	1|0	81.38	transcript for ENSG00000203963.7 protein_coding C1orf141
1	67586492	1	GACTAATATAGGGGGTCAAA	-8	5'-3'	1|0	78.885	transcript for ENSG00000203963.7 protein_coding C1orf141
1	67586492	1	GCTTGAACTGACTAATATAG	-17	5'-3'	1|0	82.3153	transcript for ENSG00000203963.7 protein_coding C1orf141
1	67586492	2	AGCTTGAACTGACTAATATG	-18	5'-3'	1|0	84.9976	transcript for ENSG00000203963.7 protein_coding C1orf141
1	67586492	2	GCTTGAACTGACTAATATGG	-17	5'-3'	1|0	83.0589	transcript for ENSG00000203963.7 protein_coding C1orf141
1	67707296	1	CATAGGTTATGGTGTCCTGA	-4	5'-3'	0|1	79.09	transcript for ENSG00000162594.10 protein_coding IL23R
1	67844120	1	ACCGATACTTAGATTAGATT	-1	3'-5'	0|1	76.5836	transcript for ENSG00000081985.6 protein_coding IL12RB2
1	67848164	1	CTCAAAACTCCATACTTGCC	-2	5'-3'	0|1	81.5775	transcript for ENSG00000081985.6 protein_coding IL12RB2
1	67848164	2	ACTCAAACTCCATACTTGCC	-3	5'-3'	0|1	80.4575	transcript for ENSG00000081985.6 protein_coding IL12RB2
1	67866383	1	GGATGGGGACTCCATTGTTA	-3	5'-3'	0|1	82.5025
1	68021342	2	CTACAGTCCCGAGTGGAGAC	-16	3'-5'	1|0	83.0402
1	68021342	2	GGACTGTAGCCCAAGGCGCA	-2	5'-3'	1|0	79.3952
1	68021342	2	GGGACTGTAGCCCAAGGCGC	-3	5'-3'	1|0	75.555
1	68111326	1	CTATAGTTGGTTAGTCAAAA	-13	5'-3'	0|1	76.0613
1	68290609	1	CGGATATTTATTACAGCCAT	-19	5'-3'	1|0	82.4482	transcript for ENSG00000172380.5 protein_coding GNG12
1	68590229	1	GAAACGTTCCCTCTATCTTC	-7	5'-3'	1|0	75.3847	transcript for ENSG00000232284.3 antisense GNG12-AS1
1	68590229	1	GGGAACGTTTCTCTATCCCC	-19	3'-5'	1|0	81.4246	transcript for ENSG00000232284.3 antisense GNG12-AS1
1	68590229	2	AGAAACGTTCCTCTATCTTC	-8	5'-3'	1|0	83.7816	transcript for ENSG00000232284.3 antisense GNG12-AS1
1	68593250	1	ACACACAGTCAGACTGAGCG	-10	3'-5'	0|1	76.1289	transcript for ENSG00000232284.3 antisense GNG12-AS1
1	68593250	2	ACCACGCTCAGTCTGTGTGT	-11	5'-3'	0|1	76.2795	transcript for ENSG00000232284.3 antisense GNG12-AS1
1	68796849	2	GTGGTGGAACCCTTGGTTGA	-18	3'-5'	1|0	76.5231
1	68956069	2	AGGTGGAGGCAAACTAACTA	-1	3'-5'	0|1	82.2194	transcript for ENSG00000024526.12 protein_coding DEPDC1
1	69670725	1	ATGATGTCAGTTAGCTCATC	-7	5'-3'	1|0	82.3667
1	70011492	1	ACTCCCAATGTGACAATATT	1	3'-5'	1|0	78.1426
1	70011492	2	GACAATATTAGAGGGCCTTT	-11	3'-5'	1|0	75.1169
1	70085073	2	CGCTTACTGTCAAACACCAC	-10	5'-3'	0|1	86.2284	transcript for ENSG00000033122.14 protein_coding LRRC7
1	70706275	2	AAAATCGAAGAATGGCTAGT	-5	3'-5'	1|0	79.5245	transcript for ENSG00000116754.9 protein_coding SRSF11
1	70792693	1	CATAATACCCCAGTAATAAC	-11	5'-3'	1|0	77.9276	transcript for ENSG00000118454.8 protein_coding ANKRD13C
1	70862979	1	GGTATCTCATCATGTCGCCC	-15	3'-5'	0|1	91.1202
1	70864637	2	ACAGCGTTAGCTTCCAAATC	-18	3'-5'	0|1	78.3892
1	70864637	2	AGGTGTTGGGATTACAGGTC	8	3'-5'	0|1	78.0643
1	70864637	2	GATTTGGAAGCTAACGCTGT	-15	5'-3'	0|1	90.4383
1	71006078	1	GGCATGAGCCACTGCCCAAT	-8	3'-5'	0|1	79.4155
1	71006078	2	ATAAAACCGATTGGGCACAG	-14	5'-3'	0|1	82.2639
1	71154989	1	GGCCCCTTCAGTGTTATCCA	-9	3'-5'	1|0	82.0749
1	71527723	1	CAAGATGGTACTCTAGATTA	-12	5'-3'	1|0	79.6032	transcript for ENSG00000235079.1 antisense ZRANB2-AS1
1	71651728	2	GATCACAGAGTGATTAAACG	-9	3'-5'	1|0	81.8239	transcript for ENSG00000229956.5 processed_transcript ZRANB2-AS2
1	72408563	2	CACTGCTAGCCTCGAACTCC	-5	5'-3'	1|0	85.921	transcript for ENSG00000172260.9 protein_coding NEGR1
1	72529562	1	ACCCCCCTGTAAGATGTAGT	0	5'-3'	1|0	85.1692	transcript for ENSG00000172260.9 protein_coding NEGR1
1	72662352	1	AAGGATGATCACTTGAACCG	0	5'-3'	0|1	85.7943	transcript for ENSG00000172260.9 protein_coding NEGR1
1	72662352	1	CAAGGATGATCACTTGAACC	-1	5'-3'	0|1	77.0806	transcript for ENSG00000172260.9 protein_coding NEGR1
1	72662352	2	CAGGATGATCACTTGAACCG	3	5'-3'	0|1	86.4955	transcript for ENSG00000172260.9 protein_coding NEGR1
1	72707049	1	AACCATGTTAGCAACTATAG	-6	3'-5'	0|1	79.1431	transcript for ENSG00000172260.9 protein_coding NEGR1
1	72707049	2	ACTTTATAGCTATAGTGGAC	-11	3'-5'	0|1	86.0622	transcript for ENSG00000172260.9 protein_coding NEGR1
1	72748567	2	AGGACTCCTCCCTCACTCGC	-18	3'-5'	1|0	77.8769
1	72748567	2	AGGAGTCCTGCGCGGCGGCG	-4	5'-3'	1|0	82.9873
1	72748567	2	GAGGAGTCCTGCGCGGCGGC	-5	5'-3'	1|0	80.21
1	72748567	2	GAGGGAGGAGTCCTGCGCGG	-9	5'-3'	1|0	78.2189
1	72748567	2	GGAGGAGTCCTGCGCGGCGG	-6	5'-3'	1|0	76.1568
1	72966206	1	AAATGACTTCCCCCGCCCTC	-8	3'-5'	0|1	82.3601
1	73772141	1	GGCTTGGGGAACTTATCCAT	-19	5'-3'	1|0	89.6976	transcript for ENSG00000233973.1 lincRNA RP4-598G3.1
1	73772904	2	CACCAGCTTTACTGCGATTC	-6	3'-5'	1|0	92.3547	exon for ENSG00000233973.1 lincRNA RP4-598G3.1
1	73855845	2	GAGGTAGGAGGATCAACTTG	-6	3'-5'	1|0	78.8016
1	73962269	1	CTTACCTAGGGATGGTGCAT	16	3'-5'	0|1	82.741
1	73962269	1	GCTAAAGTCTTACCTAGGGA	24	3'-5'	0|1	78.5894
1	73966761	2	CTGCGTATGTGATTAACTTA	-20	3'-5'	0|1	81.7205
1	73990860	1	AAATACCCCCTATTTGCCCA	-12	3'-5'	1|0	79.9254
1	74342966	1	CTTATGGGGCCAGTCAACAA	-13	3'-5'	1|0	84.0423
1	74342966	2	GTCTTATGGCCAGTCAACAA	-13	3'-5'	1|0	79.7061
1	74689601	2	ATGGCACCTCTGGACTGCAC	-13	5'-3'	1|0	80.848	transcript for ENSG00000254685.2 protein_coding FPGT
1	75090612	1	GTCTTGTATGTTGGCCAGTC	-5	5'-3'	0|1	81.1269	transcript for ENSG00000178965.9 protein_coding C1orf173
1	75428839	1	GCAGCCCCCCTAAGCAGAAT	-3	5'-3'	1|0	78.4726
1	75428839	2	CAGCCCCCCCTAAGCAGAAT	-2	5'-3'	1|0	79.6862
1	75469141	1	GGAGACACTGCGTACTTTGC	-17	3'-5'	0|1	89.6895
1	75469141	2	AGAGACACTGCGTACTTTGC	-17	3'-5'	0|1	86.7544
1	75471520	2	CATAAAGCTCCTATATCCCC	-2	5'-3'	0|1	83.221
1	75471520	2	GGATATAGGAGCTTTATGTC	-7	3'-5'	0|1	79.23
1	75706769	1	AATTTAAATATTCTCGGTCT	-14	5'-3'	0|1	78.096	transcript for ENSG00000137968.12 protein_coding SLC44A5
1	75808230	1	GGTTCAACACAGGCTTTGTT	0	3'-5'	0|1	75.505	transcript for ENSG00000137968.12 protein_coding SLC44A5
1	75832384	1	AAAAAAGCATACAGCGCCTA	-16	3'-5'	0|1	82.6243	transcript for ENSG00000137968.12 protein_coding SLC44A5
1	75832384	2	GAAAAAGCATACAGCGCCTA	-16	3'-5'	0|1	88.2285	transcript for ENSG00000137968.12 protein_coding SLC44A5
1	75882003	2	CATTTGTATGCTCGAGGTTT	-9	3'-5'	0|1	88.6414	transcript for ENSG00000137968.12 protein_coding SLC44A5
1	76581019	1	AATCAGTCATGAATCATACC	-4	3'-5'	0|1	75.0791	transcript for ENSG00000184005.9 protein_coding ST6GALNAC3
1	76581019	1	GGTATGATTCATGACTGATT	-1	5'-3'	0|1	75.5136	transcript for ENSG00000184005.9 protein_coding ST6GALNAC3
1	76622751	2	GGTATTAGAAGCTAGGGTCT	-9	5'-3'	0|1	79.1609	transcript for ENSG00000184005.9 protein_coding ST6GALNAC3
1	76622825	2	GATTGGTTCACATGCACATG	2	3'-5'	0|1	76.0406	transcript for ENSG00000184005.9 protein_coding ST6GALNAC3
1	76673733	1	GGGGGGGGGCACTCTTGAGT	-20	3'-5'	1|0	80.888	transcript for ENSG00000184005.9 protein_coding ST6GALNAC3
1	76673801	1	GTGATGTTTAAGTGGGTTAC	-6	3'-5'	1|0	83.496	transcript for ENSG00000184005.9 protein_coding ST6GALNAC3
1	76698121	2	CGAACAAAGGGTGCCAGAGT	-10	5'-3'	0|1	77.0654	transcript for ENSG00000184005.9 protein_coding ST6GALNAC3
1	77198956	1	CTGACATAAAGACAGGTACG	-2	3'-5'	1|0	82.4223
1	77198956	2	AAGACAGGTACGTAGGCCAA	-9	3'-5'	1|0	81.0602
1	77224971	1	GTGTTTCTCAGTACAAGCGG	0	3'-5'	0|1	88.3329	transcript for ENSG00000237552.1 lincRNA RP11-415A20.1
1	77239772	1	GTAGTAGACTCTGTTTGGTT	-19	3'-5'	0|1	75.7782	transcript for ENSG00000237552.1 lincRNA RP11-415A20.1
1	77532843	2	ATAATAAGCCCTGGGGGGGC	-11	5'-3'	1|0	80.6547
1	77548934	1	AGGTTTGCGGCCACATGTGC	-9	5'-3'	1|0	82.2222
1	77713903	2	CTTCTAGCTAGCTCCATTGC	-9	3'-5'	1|0	84.9431
1	77747606	1	CGGAGCGCGGCGCGCTGAAC	4	5'-3'	0|1	88.6236
1	77747606	2	GGAGGCGCGGCGCGCTGAAC	-3	5'-3'	0|1	88.6768
1	77796137	1	GGGTAAAGTGGATGTCCATA	1	3'-5'	1|0	76.381	transcript for ENSG00000154027.14 protein_coding AK5
1	77833142	2	GCATGCGCTCCTAGCTACTT	-12	3'-5'	1|0	93.4493	transcript for ENSG00000154027.14 protein_coding AK5
1	77833144	2	ATGCCTGTGCCTAGCTACTT	-14	3'-5'	1|0	81.8623	transcript for ENSG00000154027.14 protein_coding AK5
1	77833144	2	CATGCCTGTGCCTAGCTACT	-13	3'-5'	1|0	83.1868	transcript for ENSG00000154027.14 protein_coding AK5
1	78151240	1	CTCTTACATGACTAGTGTGC	3	3'-5'	0|1	90.6985
1	78439172	2	GAGGCGGGTTGGATCACTTG	-12	3'-5'	0|1	88.7548	transcript for ENSG00000162613.12 protein_coding FUBP1
1	78512512	1	GATACCCAGATTAAGTGGGG	-15	5'-3'	1|0	78.5504	transcript for ENSG00000137960.5 protein_coding GIPC2
1	79153563	1	CATTATGGTCATATAGGATT	-17	5'-3'	0|1	76.3147
1	79184595	1	ACCTTACATAATGCCTTAGC	-17	3'-5'	0|1	86.3597
1	79184595	2	CACCTACATAATGCCTTAGC	-17	3'-5'	0|1	79.568
1	79191717	1	ATCTCAAATGAGATACGTAA	-4	5'-3'	0|1	81.3355
1	79444310	1	GCGTATGGTAAAATATAGTA	-16	3'-5'	1|0	76.8802	transcript for ENSG00000162618.8 protein_coding ELTD1
1	80389644	1	GTGGCAACCCCCCCCATCAT	-6	5'-3'	0|1	87.5166
1	80415715	2	ATATAGCGGCTAATACATGA	10	5'-3'	0|1	84.0189
1	80415715	2	CATGATGCTATATCCTAGAG	-19	3'-5'	0|1	75.5956
1	80520068	2	ACACGAGCTCATTCTTGGCT	-3	5'-3'	1|0	77.4744
1	80520068	2	ATCACACACGAGCTCATTCT	-8	5'-3'	1|0	78.8261
1	81172254	2	AATCAACCATGTCGATACCC	0	3'-5'	1|0	95.5681
1	81194353	2	AATAGACATTTGGCCGGGCG	53	5'-3'	1|0	88.7818
1	81194353	2	CGGCCAAATGTCTATTGCAG	46	3'-5'	1|0	82.3157
1	81632165	2	ATCCGTAACTTTCAGGCCCT	-18	3'-5'	1|0	78.2945
1	81791625	1	GAATGCTTAGTGAGATCCTC	-20	3'-5'	1|0	80.3086	transcript for ENSG00000117114.15 protein_coding LPHN2
1	81897033	2	CGGAATCACTTCATTCTGTC	-11	3'-5'	1|0	78.0337	transcript for ENSG00000117114.15 protein_coding LPHN2
1	81912884	2	AATTCACGTAAGTATCATCT	-1	3'-5'	0|1	75.8642	transcript for ENSG00000117114.15 protein_coding LPHN2
1	81912884	2	CGTAAGTATCATCTAGGGAA	-7	3'-5'	0|1	83.6889	transcript for ENSG00000117114.15 protein_coding LPHN2
1	81912885	2	ATTCACGTAAGTATCATCAT	-3	3'-5'	0|1	81.2911	transcript for ENSG00000117114.15 protein_coding LPHN2
1	81947740	1	GAACAGACTATGTGTACCCA	-7	5'-3'	0|1	78.0172	transcript for ENSG00000117114.15 protein_coding LPHN2
1	81947740	2	CTGAACAGACTGTGTACCCA	-9	5'-3'	0|1	78.5815	transcript for ENSG00000117114.15 protein_coding LPHN2
1	82237386	1	GATAAGGTTGCACTCTCATA	-2	3'-5'	1|0	75.3681	transcript for ENSG00000117114.15 protein_coding LPHN2
1	82237386	1	GGATAAGGTTGCACTCTCAT	-1	3'-5'	1|0	80.3985	transcript for ENSG00000117114.15 protein_coding LPHN2
1	82237386	2	AGGATAAGGTTGCACTCTCA	-1	3'-5'	1|0	87.1616	transcript for ENSG00000117114.15 protein_coding LPHN2
1	82237386	2	GATAAGGTTGCACTCTCATG	-3	3'-5'	1|0	83.5219	transcript for ENSG00000117114.15 protein_coding LPHN2
1	82237386	2	GGATAAGGTTGCACTCTCAT	-2	3'-5'	1|0	87.1616	transcript for ENSG00000117114.15 protein_coding LPHN2
1	82342279	2	AACAGTACTTATTGATAGCC	-18	3'-5'	1|0	76.8583	transcript for ENSG00000117114.15 protein_coding LPHN2
1	82355255	1	ACCTCCCACTTCTATGTTAT	-11	3'-5'	1|0	77.8698	transcript for ENSG00000117114.15 protein_coding LPHN2
1	82796758	2	AAATCACCCGATTCTTTGGG	-12	3'-5'	1|0	76.8796
1	82796758	2	ATCACCCGATTCTTTGGGTG	-14	3'-5'	1|0	82.9346
1	82796758	2	GGTCCCCCACCCAAAGAATC	-18	5'-3'	1|0	81.8136
1	82796758	2	GGTTAAATCACCCGATTCTT	-8	3'-5'	1|0	90.3806
1	82796758	2	GTTAAATCACCCGATTCTTT	-9	3'-5'	1|0	81.9034
1	82916099	1	AACAAAACGTGTTAAGGCCC	-7	5'-3'	0|1	81.4798
1	82916099	2	CAAAACATGTGTTAAGGCCC	-5	5'-3'	0|1	81.6691
1	83045791	2	GGCATATATTAGGCTAGTCC	-5	5'-3'	1|0	87.7658
1	83045795	2	GCATATTTATAGGCTAGTCC	-8	5'-3'	1|0	85.8888
1	83101446	1	CTGCAGTTTCCAGCTGGCGA	-20	5'-3'	0|1	76.1883
1	83110439	1	GTATAGACAGGACCGTGGAG	-15	3'-5'	0|1	81.5445
1	83168548	2	AATAGACTGCCAGCCCATAA	4	5'-3'	1|0	84.0607
1	83168548	2	AATTACCACCCATTATGGGC	13	3'-5'	1|0	80.9275
1	83168548	2	ATAGACTGCCAGCCCATAAT	5	5'-3'	1|0	85.039
1	83168548	2	GACTGCCAGCCCATAATGGG	8	5'-3'	1|0	83.7467
1	83168804	1	GCAATTTAGGCGGCTGAGGT	-17	5'-3'	1|0	80.7763
1	83168804	2	CAGCAATTTAGGCGGCTGAG	-19	5'-3'	1|0	88.9884
1	83168804	2	GCTGAGGGGCGGATCACTTG	-5	5'-3'	1|0	79.6422
1	83168893	2	GTAGCTGGGATTATGCGCCC	-2	3'-5'	1|0	93.0258
1	83295082	1	CAAAATACGTTATCAAGAGC	-17	3'-5'	1|0	78.9403
1	83551820	1	CGTGCAGATCCTTAAGTGAA	-21	3'-5'	1|0	75.8864	transcript for ENSG00000230817.1 lincRNA RP4-601K24.1
1	83632203	2	GGTAGTTGCCAGGGTTACGG	-4	3'-5'	1|0	91.9925	transcript for ENSG00000230817.1 lincRNA RP4-601K24.1
1	83717588	2	CATTTATAGACCACCCCCCA	-19	5'-3'	1|0	79.9938
1	84046526	2	GTCTACGACCCCCCATTAAA	1	3'-5'	0|1	93.0677	transcript for ENSG00000233008.1 lincRNA RP11-475O6.1
1	84086553	1	GGATAAGACCTGAAACGCAT	-11	5'-3'	0|1	87.1149	transcript for ENSG00000233008.1 lincRNA RP11-475O6.1
1	84086553	2	GATAAGACCTGAAAACGCAT	-10	5'-3'	0|1	86.948	transcript for ENSG00000233008.1 lincRNA RP11-475O6.1
1	84095098	2	GATGGGGTACCGTGTTAGCC	-14	3'-5'	0|1	92.1906	transcript for ENSG00000233008.1 lincRNA RP11-475O6.1
1	84095098	2	GGGTACCGTGTTAGCCAGGA	-18	3'-5'	0|1	79.5331	transcript for ENSG00000233008.1 lincRNA RP11-475O6.1
1	84095101	2	GGTAATTCACCGTGTTAGCC	-17	3'-5'	0|1	87.7676	transcript for ENSG00000233008.1 lincRNA RP11-475O6.1
1	84113982	2	ATGATGCGGGAATTCTATCA	-6	5'-3'	1|0	79.9179	transcript for ENSG00000233008.1 lincRNA RP11-475O6.1
1	84148755	2	GCATTGTCGTCAAAGCATAA	-10	5'-3'	1|0	79.878	transcript for ENSG00000233008.1 lincRNA RP11-475O6.1
1	84207632	2	AAACTACAGGCATTAGATAG	-12	5'-3'	0|1	77.7474	transcript for ENSG00000233008.1 lincRNA RP11-475O6.1
1	84379498	2	GCTTGTCAACTATAACCTCT	-14	3'-5'	0|1	79.9566	transcript for ENSG00000137941.12 protein_coding TTLL7
1	84916088	1	CTAGACTAGGCTTGACTAGG	-6	3'-5'	0|1	83.1364
1	84916088	1	GACTAGGCTTGACTAGGGGG	-9	3'-5'	0|1	80.378
1	84916088	2	GTTTCTAGACTAGGCTTGAT	-3	3'-5'	0|1	80.6606
1	85298401	2	GGTGTGAAACGTGCACTGGA	-16	3'-5'	0|1	77.1825	transcript for ENSG00000171517.5 protein_coding LPAR3
1	85411049	1	CTTACAGATACGCAGAGATC	-5	3'-5'	0|1	80.5393	transcript for ENSG00000153898.8 protein_coding MCOLN2
1	85411049	2	ACTCTCTTACAGATACGCAG	1	3'-5'	0|1	86.3028	transcript for ENSG00000153898.8 protein_coding MCOLN2
1	85551468	1	ACCAACATTGCCTACACATC	-17	5'-3'	0|1	77.7883	transcript for ENSG00000162643.8 protein_coding WDR63
1	85595135	1	GCCTACACTCGAAGCCCTCC	8	5'-3'	0|1	84.5994	transcript for ENSG00000162643.8 protein_coding WDR63
1	85906485	1	AACTGATGTCCAACTAAGCT	13	5'-3'	0|1	80.1448	transcript for ENSG00000223653.1 antisense RP11-131L23.1
1	85906485	1	AATACATTTCCGAGCTTAGT	22	3'-5'	0|1	81.9173	transcript for ENSG00000223653.1 antisense RP11-131L23.1
1	85949828	2	ATCTCTCGGAAGAATACTGG	-6	5'-3'	0|1	76.2015	transcript for ENSG00000153904.14 protein_coding DDAH1
1	86129611	1	CGTCTCTGTAGCCACTCTGT	-5	5'-3'	1|0	81.8783	transcript for ENSG00000117174.6 protein_coding ZNHIT6
1	86248972	1	GGAAGTACGGGTGGTCTATG	1	5'-3'	1|0	89.1256	transcript for ENSG00000171502.10 protein_coding COL24A1
1	86248972	1	GTAAGACTAGGAAGTACGGG	-8	5'-3'	1|0	85.1485	transcript for ENSG00000171502.10 protein_coding COL24A1
1	86248972	2	AGTAAGACTAGAAGTACGGG	-9	5'-3'	1|0	85.1778	transcript for ENSG00000171502.10 protein_coding COL24A1
1	86272361	1	CAAATGTGGTTTGCTAATAC	0	5'-3'	0|1	76.5997	transcript for ENSG00000171502.10 protein_coding COL24A1
1	86348273	2	GCATGTGCATTCTACTGTGT	-16	5'-3'	0|1	79.1232	transcript for ENSG00000171502.10 protein_coding COL24A1
1	86989850	2	CGGGGATGCGCCCGGGAACC	17	3'-5'	0|1	83.1625
1	86989850	2	GGGGATGCGCCCGGGAACCG	16	3'-5'	0|1	79.4521
1	87169592	1	AAGAAGTTACTTGGAACGAC	1	5'-3'	0|1	85.5123	exon for ENSG00000261737.1 antisense RP4-612B15.3
1	87185387	1	CATTAACATATTAGTAGGCC	-6	5'-3'	0|1	84.1569	transcript for ENSG00000097033.10 protein_coding SH3GLB1
1	87185387	2	AGATGTCATTAACAGTAGGC	-12	5'-3'	0|1	80.8306	transcript for ENSG00000097033.10 protein_coding SH3GLB1
1	87185387	2	GATGTCATTAACAGTAGGCC	-11	5'-3'	0|1	85.3867	transcript for ENSG00000097033.10 protein_coding SH3GLB1
1	87213181	1	AGGGCACTGTTGTTGGTTAA	-4	3'-5'	0|1	78.5805	exon for ENSG00000097033.10 protein_coding SH3GLB1
1	87216428	1	AACACCAAAGCGGAGTTAAG	-16	5'-3'	0|1	79.9599
1	87216959	1	CAGCAAGAAACACAACGTCT	-6	3'-5'	0|1	77.0697
1	87223191	1	ACACTGGACACAGCGCTGAA	-4	5'-3'	0|1	80.2802
1	87223191	1	CAGCGCTGTGTCCAGTGTAG	-9	3'-5'	0|1	77.6723
1	87223191	2	AGCGCTGTGTCCTAGTGTAG	-9	3'-5'	0|1	84.6003
1	87223191	2	CACTAGGACACAGCGCTGAA	-3	5'-3'	0|1	82.5629
1	87223191	2	CAGCGCTGTGTCCTAGTGTA	-8	3'-5'	0|1	80.4908
1	87223191	2	GCGCTGTGTCCTAGTGTAGG	-10	3'-5'	0|1	87.2969
1	87243689	2	GGTTGCCAGTTAGAGACCAT	-15	3'-5'	0|1	75.5719
1	87267708	1	GGGTGGCCTGCTCCTTTATT	-10	5'-3'	0|1	82.9873
1	87600438	1	GGTCAGGATCCGCCTCTCCG	-3	3'-5'	1|0	76.2959	exon for ENSG00000153936.12 protein_coding HS2ST1
1	87600438	2	GTCAGGATCCGCCTCTCCCG	-3	3'-5'	1|0	78.9515	exon for ENSG00000153936.12 protein_coding HS2ST1
1	87717392	1	ATCTCAGTTAAGTCACTCCA	-6	5'-3'	0|1	75.8879
1	87722844	2	GTCTCACGGTCTAACTTTCA	-15	3'-5'	0|1	85.5337
1	88001498	1	CGTGAAGATCTGTGGAGGAT	0	5'-3'	0|1	75.7491
1	88001498	1	GATAACGTGAAGATCTGTGG	-5	5'-3'	0|1	82.6939
1	88001498	1	GATCTTCACGTTATCATTCT	-13	3'-5'	0|1	76.2931
1	88184554	1	CTCTAACGCCTCACACTTTA	-10	5'-3'	0|1	80.8993	enhancer element_1058
1	88184554	2	CTAACGCCTCACACACTTTA	-8	5'-3'	0|1	80.879	enhancer element_1058
1	88210465	1	CACAAATTCTTGGGTGTATT	-2	5'-3'	1|0	76.7816
1	88576686	1	GTAAGAGGGTTATCTGGTAA	-20	3'-5'	0|1	76.84
1	88673780	1	AGCTAGGAGTAGTAGCCTAG	-19	3'-5'	0|1	84.8775
1	88673780	1	CTAGGAGTAGTAGCCTAGAG	-21	3'-5'	0|1	79.2472
1	88673780	1	GCTAGGAGTAGTAGCCTAGA	-20	3'-5'	0|1	85.3974
1	88673780	2	GCGTAGGAGTAGTAGCCTAG	-19	3'-5'	0|1	86.5964
1	88921709	1	ACCGCTTGGAAAACCGCGCA	-19	3'-5'	1|0	97.2488
1	88921709	1	GAAAGCAGCAGGACACCGCT	-5	3'-5'	1|0	76.1823
1	88985028	2	GAATGATTCCTAGGTTGCAG	-13	5'-3'	0|1	75.7085
1	89101217	1	CAGCTGGTCCTCAGTCATAG	-18	5'-3'	1|0	80.0831	transcript for ENSG00000237505.2 antisense RP11-76N22.2
1	89102483	2	CTGTTCTTATGATAGTGCAT	-9	5'-3'	1|0	79.5569	transcript for ENSG00000237505.2 antisense RP11-76N22.2
1	89463233	1	GACTCCTTACTAACCCCTGA	-19	5'-3'	0|1	79.8696
1	89463233	2	GCTGACCTCAGGGGTTAGTA	-15	3'-5'	0|1	84.6819
1	89467378	1	CTATGGTAGCTTCAGCAAAC	-17	5'-3'	0|1	75.7072
1	89468615	2	ATACTCCACTGACACTAGAC	-8	3'-5'	0|1	87.4838
1	89476440	1	GGGAGGGAGACTGTTATATC	-13	3'-5'	0|1	80.8666	transcript for ENSG00000117226.7 protein_coding GBP3
1	89790425	2	GTGACATTGACTCCCCCTGA	-8	3'-5'	1|0	82.5766	exon for ENSG00000233235.1 pseudogene RP5-908D6.1
1	89844905	1	AATATGACCCCCCCCAATGT	-7	3'-5'	2|1	86.6389	transcript for ENSG00000183347.13 protein_coding GBP6
1	89844905	1	ACCCCCCCCAATGTTGGAGG	-13	3'-5'	2|1	77.3922	transcript for ENSG00000183347.13 protein_coding GBP6
1	89844905	1	ATGACCCCCCCCAATGTTGG	-10	3'-5'	2|1	87.4176	transcript for ENSG00000183347.13 protein_coding GBP6
1	89844905	2	ATATGACCCCCCCCCAATGT	-7	3'-5'	2|1	83.5421	transcript for ENSG00000183347.13 protein_coding GBP6
1	90104044	1	ACACCATGTGTTCTCAAGCG	-4	3'-5'	1|0	84.3011	transcript for ENSG00000230735.1 sense_intronic RP11-413E1.4
1	90104044	1	CACCATGTGTTCTCAAGCGG	-5	3'-5'	1|0	85.352	transcript for ENSG00000230735.1 sense_intronic RP11-413E1.4
1	90104044	2	ACCATGTGTTCTCAAGGCGG	-5	3'-5'	1|0	88.3567	transcript for ENSG00000230735.1 sense_intronic RP11-413E1.4
1	90104044	2	CACCATGTGTTCTCAAGGCG	-4	3'-5'	1|0	88.0521	transcript for ENSG00000230735.1 sense_intronic RP11-413E1.4
1	90280768	1	ACTTGACCTCTCAGCAGTAC	-16	3'-5'	1|0	80.2419	transcript for ENSG00000271949.1 protein_coding RP11-302M6.4
1	90282382	1	ATATCCATATTTAGCCCACC	-13	5'-3'	1|0	75.4896	transcript for ENSG00000271949.1 protein_coding RP11-302M6.4
1	90282382	2	CATATTTAGCCCCTCCCACC	-8	5'-3'	1|0	82.7875	transcript for ENSG00000271949.1 protein_coding RP11-302M6.4
1	91334466	1	CAACACGAATGAACCCTTTA	-3	3'-5'	1|0	84.0412
1	91334466	2	ACAACACGAATGAACCCTTA	-3	3'-5'	1|0	87.3052
1	91533070	2	AAGACGTTACAGACCAGGGG	-3	3'-5'	1|0	77.6532
1	91708799	2	ACCTGAAAAAGGACCTGTAC	0	3'-5'	0|1	81.5119
1	91894045	1	ACTGGGGTTCCCGGCACCAC	2	5'-3'	1|0	77.227
1	91913667	2	AGAATGTTGGACACAGGGCG	-5	5'-3'	1|0	75.9374
1	91967142	1	AACATGCTACTGCCCCCCAA	-10	3'-5'	0|1	80.1452	transcript for ENSG00000097046.8 protein_coding CDC7
1	91967142	2	ACATGCTACTGGCCCCCCAA	-10	3'-5'	0|1	76.637	transcript for ENSG00000097046.8 protein_coding CDC7
1	91967142	2	ACGCACTAAAAACATGCTAC	1	3'-5'	0|1	80.1577	transcript for ENSG00000097046.8 protein_coding CDC7
1	91967142	2	ATGCTACTGGCCCCCCAAAG	-12	3'-5'	0|1	81.1072	transcript for ENSG00000097046.8 protein_coding CDC7
1	91967142	2	CATGCTACTGGCCCCCCAAA	-11	3'-5'	0|1	77.2344	transcript for ENSG00000097046.8 protein_coding CDC7
1	92011093	2	GGGGGCTAATTGCAGCTGTC	-7	3'-5'	0|1	78.7738
1	92019984	1	ATCAGCAACATTTCCCCCCC	-2	3'-5'	0|1	81.7309
1	92019984	2	GATCAGCAACATTTCCCCCC	-2	3'-5'	0|1	79.1298
1	92306694	1	GTCTGCCAAATACTGAAGTC	-4	5'-3'	0|1	75.3622	transcript for ENSG00000069702.6 protein_coding TGFBR3
1	92393776	1	CAGGGGGAATCGAGTGTGAC	-1	5'-3'	0|1	79.2004
1	92393776	2	AGGGGGGAATCGAGTGTGAC	0	5'-3'	0|1	83.0078
1	92398884	1	ATGGGGGGTCGCACTTTGTT	-1	5'-3'	1|0	92.0008
1	92411730	1	AGAGACGGGGTTCACCATGT	-9	5'-3'	1|0	87.4128
1	92457409	2	GCGCATGGCGCCATCACGCC	-5	3'-5'	1|0	93.23	transcript for ENSG00000137948.14 protein_coding BRDT
1	92592064	2	GCGGTCTGCATGAGTGAAGT	-2	3'-5'	0|1	81.8499	transcript for ENSG00000189195.5 protein_coding BTBD8
1	92679004	2	CTAGTACCTATTTGTCTGTT	52	3'-5'	1|0	75.9786
1	92681353	1	AGTGCCGCAAGCTCAGTCCT	-21	3'-5'	0|1	76.9052
1	92681353	1	GCACTCCAAGCAAGATTAAA	-3	5'-3'	0|1	77.6806
1	92681353	2	CGGCACATAAATGGCCAGTG	-5	5'-3'	0|1	84.2057
1	92681353	2	CTGAGCTTGCGGCACATAAA	-14	5'-3'	0|1	82.3907
1	92727379	2	ACTGACGGAGTGATAGACAG	-5	5'-3'	2|1	75.8474	transcript for ENSG00000174842.12 protein_coding GLMN
1	92827407	1	ACAGAAAACAGTTACGTCCA	-16	3'-5'	1|0	84.5479	transcript for ENSG00000122484.8 protein_coding RPAP2
1	93042102	2	GCTAACGGGGTAGAGTAAAA	-5	5'-3'	1|0	78.6037	transcript for ENSG00000067208.10 protein_coding EVI5
1	93290173	2	AATGATACAGACAGGCACGG	-1	5'-3'	1|0	81.1201
1	93403389	2	GCTACTTAATGTTAAGGTTC	-4	5'-3'	1|0	81.3167	transcript for ENSG00000154511.7 protein_coding FAM69A
1	93441121	1	AAAGCTACAAACAAACGGCC	-6	3'-5'	1|0	84.607
1	93441121	2	AAGCTACAAACGGCCAGGCG	-11	3'-5'	1|0	92.7332
1	93441121	2	CATTAAAGCTACAAACGGCC	-6	3'-5'	1|0	92.3951
1	93441121	2	CTACAAACGGCCAGGCGCGG	-14	3'-5'	1|0	83.8838
1	93492025	2	GTACGTCCCTTGGTTTATCA	1	3'-5'	0|1	82.6874	exon for ENSG00000222664.1 misc_RNA RN7SKP123
1	93764951	1	CATACTTACTGTACTAAGTA	-5	3'-5'	1|0	78.1085	transcript for ENSG00000223745.3 processed_transcript RP4-717I23.3
1	93972096	1	GGTACTAGTCAGTGAGTCTC	-4	5'-3'	1|0	75.2691	transcript for ENSG00000137942.12 protein_coding FNBP1L
1	93972096	2	GGGTACAGTCAGTGAGTCTC	-5	5'-3'	1|0	82.146	transcript for ENSG00000137942.12 protein_coding FNBP1L
1	93973264	2	AGTGAAGTGGTGTGCGATCT	-8	5'-3'	0|1	91.2907	transcript for ENSG00000137942.12 protein_coding FNBP1L
1	94317927	1	CGACAATACAAGCATTGGCA	0	5'-3'	1|0	84.0982
1	94475895	2	GTGATCACGACCCCCACTCC	-7	3'-5'	1|0	75.3783	transcript for ENSG00000198691.7 protein_coding ABCA4
1	94476203	1	CGATCCTCTACTTGTATTAT	-7	5'-3'	1|0	84.2221	transcript for ENSG00000198691.7 protein_coding ABCA4
1	94478784	2	AGACTCTGGAAAGTAGCGGG	-7	3'-5'	0|1	83.7644	transcript for ENSG00000198691.7 protein_coding ABCA4
1	94478784	2	CAGACTCTGGAAAGTAGCGG	-6	3'-5'	0|1	83.3706	transcript for ENSG00000198691.7 protein_coding ABCA4
1	94622229	2	CTTCAAACTAGCACCATTCA	-15	3'-5'	1|0	76.6236	transcript for ENSG00000137962.8 protein_coding ARHGAP29
1	94644054	2	CTGGGAACTTAAACATCGTC	-16	5'-3'	1|0	81.7495	transcript for ENSG00000137962.8 protein_coding ARHGAP29
1	94660133	1	AAAAGAACAGTCTACGCATC	-18	3'-5'	1|0	92.6012	transcript for ENSG00000137962.8 protein_coding ARHGAP29
1	94660133	2	AGAAGAACAGTCTACGCATC	-18	3'-5'	1|0	92.0224	transcript for ENSG00000137962.8 protein_coding ARHGAP29
1	94663740	1	ATTAAAACAGCCAGCCACGG	2	5'-3'	0|1	80.8178	transcript for ENSG00000137962.8 protein_coding ARHGAP29
1	94710052	1	CATCTACAAAAAAAACCGAC	-6	5'-3'	1|0	85.5672	transcript for ENSG00000137962.8 protein_coding ARHGAP29
1	94710052	2	GCATCTACAAAAAAACCGAC	-7	5'-3'	1|0	75.2672	transcript for ENSG00000137962.8 protein_coding ARHGAP29
1	94850021	1	ATAACACATGGCCCATCCTA	23	5'-3'	1|0	77.1017
1	94850021	1	CTTTATTGAGCCCCTAGGAT	34	3'-5'	1|0	77.673
1	94991687	1	ATTTATACGGCTGGAATGAG	-16	5'-3'	0|1	77.1653
1	94991687	1	GATTTATACGGCTGGAATGA	-17	5'-3'	0|1	77.7749
1	94991687	2	AGAGATTTATACGGCTGGAA	-20	5'-3'	0|1	78.9987
1	94991687	2	GAGATTTATACGGCTGGAAT	-19	5'-3'	0|1	86.1153
1	95054470	1	GCAGTTTGGGAGGCTTATGT	-17	3'-5'	1|0	81.2254	transcript for ENSG00000223675.1 lincRNA RP11-86H7.6
1	95054470	2	GCCTCCCAAGCTGGGATAAC	-8	5'-3'	1|0	75.0125	transcript for ENSG00000223675.1 lincRNA RP11-86H7.6
1	95119471	1	GCCAGTCACAAAAGTTGGCC	-9	3'-5'	0|1	80.1684	transcript for ENSG00000224081.3 lincRNA LINC01057
1	95119471	1	GTCACAAAAGTTGGCCTGGT	-13	3'-5'	0|1	78.5522	transcript for ENSG00000224081.3 lincRNA LINC01057
1	95119471	2	AGCCAGTCACAAAGTTGGCC	-9	3'-5'	0|1	79.1405	transcript for ENSG00000224081.3 lincRNA LINC01057
1	95312999	1	GATAAGCACTGCTATGTAAC	-4	3'-5'	1|0	75.3697	transcript for ENSG00000143036.12 protein_coding SLC44A3
1	95312999	2	AGATAAGCACTACTGGGACC	-11	3'-5'	1|0	81.7338	transcript for ENSG00000143036.12 protein_coding SLC44A3
1	95402723	1	GCAATTCCTTTCACTAGTTG	-7	5'-3'	0|1	76.9682	transcript for ENSG00000235501.1 antisense RP4-639F20.1
1	95494764	1	AAGGTGGCTCACTCAATGGC	-14	5'-3'	0|1	78.6415	transcript for ENSG00000172339.9 protein_coding ALG14
1	95494764	1	AGCCATTGAGTGAGCCACCT	-16	3'-5'	0|1	80.2605	transcript for ENSG00000172339.9 protein_coding ALG14
1	95564822	1	CGATTCATTTCTGAGTAGAG	-10	3'-5'	1|0	75.8194
1	95742546	2	GCTGCTATGTAAAGCTAGCT	0	3'-5'	0|1	84.492
1	95781171	2	GCACTGTAAACAAGCTAGGG	1	3'-5'	1|0	82.7277	transcript for ENSG00000228504.1 lincRNA RP4-586O15.1
1	96217387	2	CAATCTATCACTGAGGGGAC	-4	3'-5'	1|0	82.1636	transcript for ENSG00000228971.2 lincRNA RP11-286B14.1
1	96217387	2	CAGTCCCCTCAGTGATAGAT	-3	5'-3'	1|0	80.1621	transcript for ENSG00000228971.2 lincRNA RP11-286B14.1
1	96262200	1	AGCCAACAAGAACGCACTCT	-13	3'-5'	1|0	81.6652
1	96262200	1	GTCCTAGAGTGCGTTCTTGT	-15	5'-3'	1|0	85.7256
1	96262200	2	CAAAGCCAAGAACGCACTCT	-13	3'-5'	1|0	93.7399
1	96368829	1	ACTCACCACCCTAAGGCAAC	-20	5'-3'	0|1	81.753
1	96368829	1	GCTTACCTGTTGCCTTAGGG	-15	3'-5'	0|1	79.2809
1	96368829	2	GCTTGCTTACTGTTGCCTTA	-12	3'-5'	0|1	76.4377
1	96598169	1	AGATTACAAGGCGTGAGCCA	-3	3'-5'	0|1	86.4978
1	96598169	2	GATTACAAGGCGACGGCACG	-10	3'-5'	0|1	95.1741
1	96623386	1	GTAACTTGATAATTGGAGCC	-16	3'-5'	1|0	81.4196
1	96894698	2	ACGTTTATAGCTGCACAAAT	-21	3'-5'	1|2	76.5579
1	97144125	1	AATGGCGCGAACCAGGGGGG	-2	3'-5'	0|1	89.3223
1	97144125	2	GAATGGCGCGAACCAGGGGG	-2	3'-5'	0|1	80.6548
1	97159710	2	ACAGACGTGAGCACCGCGCC	-10	5'-3'	1|0	90.0696
1	97461472	1	ATTATACTTTGGAGGTCACC	-10	3'-5'	0|1	78.78
1	97573901	1	GTTTGACTACATGATCTATG	-18	5'-3'	0|1	76.6029	transcript for ENSG00000188641.8 protein_coding DPYD
1	97775235	2	GCCTGCAACTAATCTTAAAT	-15	5'-3'	0|1	80.0619	transcript for ENSG00000188641.8 protein_coding DPYD
1	98536321	2	CTGGAAGCAATGGGTTGGTC	-16	3'-5'	0|1	78.5928
1	98683696	1	AATGACTGGTGCACATAACT	-3	5'-3'	1|0	76.4465	transcript for ENSG00000226053.1 lincRNA RP5-1070A16.1
1	98687643	1	GCAATCTTCTAGCCAGACTC	-5	5'-3'	1|0	75.5009	transcript for ENSG00000226053.1 lincRNA RP5-1070A16.1
1	98687643	2	AGTCTGGCTAGAAAGATTGC	-8	3'-5'	1|0	80.3218	transcript for ENSG00000226053.1 lincRNA RP5-1070A16.1
1	98978444	2	CTCCCGGATGGGATGGCGGC	-5	5'-3'	0|1	78.1895
1	98978444	2	GGCCGCCATCCCATCCGGGA	-7	3'-5'	0|1	79.8316
1	99186654	2	CATTGGGAACACACAACTTG	-8	3'-5'	0|1	77.5272	transcript for ENSG00000162627.12 protein_coding SNX7
1	99189346	2	AGCGCAACCTCTGCGCCTCC	-6	3'-5'	0|1	79.8571	transcript for ENSG00000162627.12 protein_coding SNX7
1	99375390	1	CTGAATATTTAGTGGACGTT	-4	5'-3'	1|0	78.7332	transcript for ENSG00000117598.7 protein_coding LPPR5
1	99375390	2	ATATTTATTTAGTGGACGTT	0	5'-3'	1|0	82.5264	transcript for ENSG00000117598.7 protein_coding LPPR5
1	99476376	1	ATGATCGTGGCTATCATGAA	-16	3'-5'	1|0	83.1211	transcript for ENSG00000232825.1 antisense RP5-896L10.1
1	99576716	1	GGTAAATGTTGCTCATGCTA	-8	5'-3'	0|1	78.3317	transcript for ENSG00000232825.1 antisense RP5-896L10.1
1	100153453	1	CAAGAACCACCAGGCTATAG	-3	5'-3'	1|0	78.7133	transcript for ENSG00000099260.6 protein_coding PALMD
1	100153453	1	CTCTATAGCCTGGTGGTTCT	-4	3'-5'	1|0	79.8507	transcript for ENSG00000099260.6 protein_coding PALMD
1	100153453	1	GAACCACCAGGCTATAGAGG	0	5'-3'	1|0	75.9159	transcript for ENSG00000099260.6 protein_coding PALMD
1	100286687	2	AAATGGGTGGCCGGGTGCGG	-3	5'-3'	0|1	75.3142
1	100324643	1	GTATAAACTTAACAGGGGAC	-12	5'-3'	0|1	84.7034	transcript for ENSG00000162688.11 protein_coding AGL
1	100800447	1	AACAACGGTTAAATAGAGCC	-5	5'-3'	0|1	86.7751
1	100800447	2	CAACAGGGTTAAATAGAGCC	-3	5'-3'	0|1	79.0612
1	100963479	2	CTGACACAGCACTAACTGCC	-5	3'-5'	1|0	75.532	transcript for ENSG00000079335.13 protein_coding CDC14A
1	101392318	1	ATGAGGGTAGGCTATTTGCC	-2	3'-5'	1|0	79.7971	transcript for ENSG00000162695.7 protein_coding SLC30A7
1	101392318	2	GGGCAAATAGCCTACCCTCA	16	5'-3'	1|0	79.3373	transcript for ENSG00000162695.7 protein_coding SLC30A7
1	101429266	2	AATCAGTTACACTAGCCACG	-3	3'-5'	1|0	86.46	transcript for ENSG00000162695.7 protein_coding SLC30A7
1	101529928	1	AATCCCGAGTCCTGGGCAAA	-16	3'-5'	1|0	76.9423	transcript for ENSG00000233184.2 antisense RP11-421L21.3
1	101529928	1	ACTCGGGATTCCTGGAACTT	-3	5'-3'	1|0	78.942	transcript for ENSG00000233184.2 antisense RP11-421L21.3
1	101529928	1	GTTCCAGGAATCCCGAGTCC	-8	3'-5'	1|0	78.3735	transcript for ENSG00000233184.2 antisense RP11-421L21.3
1	101609696	1	GAAGGTGCTGGGTTACAGTT	-19	3'-5'	1|0	78.4251
1	101621089	1	GGGTGCTTGCACATGGCGGG	-17	5'-3'	0|1	76.8727
1	101621089	1	GTGGGTGCTTGCACATGGCG	-19	5'-3'	0|1	79.4175
1	101621089	2	GGTGCTTGCACATGGCGTGG	-16	5'-3'	0|1	81.3103
1	101621089	2	GTGGGTGCTTGCACATGGCG	-19	5'-3'	0|1	79.4175
1	101867624	1	ATAGGCTTTCCTTAGATTGC	-18	3'-5'	0|1	77.4519
1	102200918	1	CAGATATATAGGGCTGACTA	-12	5'-3'	0|1	78.6895
1	102238941	1	GAAAGCCTAACCACATCAAT	-8	5'-3'	1|0	84.8905
1	102238941	2	AGCCTAACCACCACATCAAT	-5	5'-3'	1|0	77.241
1	102462446	2	GGCAGGCAGAAAGTGCACGA	-5	3'-5'	1|0	78.4473	exon for ENSG00000118733.12 protein_coding OLFM3
1	102479908	1	GTCCTTAGGCTGCACATAAC	-9	3'-5'	1|0	82.8495
1	102479908	2	CAAGTCCTTAGGCACATAAC	-9	3'-5'	1|0	83.2095
1	102500897	1	CGCCAACGGTGGTAAAGAAA	-16	5'-3'	1|0	86.529
1	102500897	2	ACGCCAACGGTGGTAAAGAA	-17	5'-3'	1|0	87.4925
1	102500897	2	ATCCCTTTCTTTACCACCGT	-14	3'-5'	1|0	83.8853
1	102500897	2	CGCCAACGGTGGTAAAGAAA	-16	5'-3'	1|0	83.8853
1	102563922	1	CAAAAAAGTCCTCCACACGG	-5	5'-3'	1|0	83.5106
1	102565758	2	AATCCCAGGTCCCCCCAATA	-4	3'-5'	1|0	76.2163
1	102565758	2	CATGGTGTTTCCCTATTGGG	-14	5'-3'	1|0	76.5483
1	102565758	2	GAATCCCAGGTCCCCCCAAT	-3	3'-5'	1|0	82.5713
1	102565758	2	GTCTCATGGTGTTTCCCTAT	-18	5'-3'	1|0	79.5386
1	102586024	1	AGTGAATAGGTGTATGCTTC	-8	5'-3'	1|0	78.6902
1	102778137	1	CAGCGAGACACAGTAGGCGT	-14	5'-3'	1|2	90.3596	transcript for ENSG00000233359.1 lincRNA RP11-202K23.1
1	102778137	2	CAGCGAGACACAGTTGGCGT	-14	5'-3'	1|2	91.3058	transcript for ENSG00000233359.1 lincRNA RP11-202K23.1
1	102843582	2	ATAACGTTGTCACTTTGAGG	2	3'-5'	1|0	76.6254	transcript for ENSG00000233359.1 lincRNA RP11-202K23.1
1	102921650	1	ACCATCTCCCCCCTAGAGGT	-6	5'-3'	0|1	79.979
1	103123921	1	CATACGTGTGGGGGTAAATT	-8	5'-3'	1|0	82.4041
1	103123921	2	ATACGTGTGGGGGGTAAATT	-7	5'-3'	1|0	80.7289
1	103239242	1	GCTCTCGAATCCACCTGCCT	-7	5'-3'	1|0	78.8446	transcript for ENSG00000230864.1 lincRNA RP5-936J12.1
1	103316614	1	AACTTCTGCCCCTAATTGGC	-14	5'-3'	0|1	87.533	transcript for ENSG00000230864.1 lincRNA RP5-936J12.1
1	103316614	2	AAACTTCTGCCCCTAATGGC	-15	5'-3'	0|1	84.0753	transcript for ENSG00000230864.1 lincRNA RP5-936J12.1
1	103403088	1	GTTCTTAAGGTGGATCTATC	-16	5'-3'	2|1	87.2892	transcript for ENSG00000060718.14 protein_coding COL11A1
1	103509691	2	AATTCGAATTCTAAGTAGAC	-17	3'-5'	0|1	76.5212	transcript for ENSG00000060718.14 protein_coding COL11A1
1	103646921	2	CGCACACACAAAGCTACTTC	-1	5'-3'	1|0	82.4104
1	103755975	1	GGCTGAAGATGAACGACAAG	-5	3'-5'	1|0	81.7002
1	104844875	1	CGCGTGCGCACTGAGCCACC	-19	3'-5'	1|0	79.7573
1	104847037	2	AAGTGGTGGATCAGGATCAT	-3	3'-5'	1|0	81.9647
1	104847037	2	CTAATGGGAAGTGGTGGATC	5	3'-5'	1|0	77.782
1	104847321	1	AACGAATATGCACCCAACAC	-9	5'-3'	1|0	85.5075
1	104847321	2	GAATATGCACCACCCAACAC	-6	5'-3'	1|0	81.3652
1	104961234	2	ACAGGCTCACGCTCTTGTTC	-12	3'-5'	0|1	84.1489
1	104968058	2	ATCAACTGGGATTATCATAG	-9	3'-5'	0|1	76.3099
1	105063521	1	AACCTATCTTGTGCCTCCAA	-11	5'-3'	1|0	76.5791
1	105861962	2	CGCACATTGCACTCTAGCTT	-3	5'-3'	0|1	87.7836
1	105890958	1	GGCTATGGGATTGTCATAGA	-8	3'-5'	0|1	76.1522
1	105954481	1	GTGGGACATAGCACTCCTCC	-10	3'-5'	2|1	80.8794
1	105985049	2	CATTATAGAGCCCACTATAC	-6	3'-5'	0|1	87.4605
1	106047378	1	CGAATAGAAGTCGTGAGAGT	-3	3'-5'	0|1	86.46
1	106047378	2	GACGAATAGAAGTCGTGAGT	-3	3'-5'	0|1	90.5987
1	106177843	2	GTCAGACCTTTAATTGCCTG	-8	5'-3'	0|1	81.3455
1	106177843	2	GTCTGACCACAGGCAATTAA	-2	3'-5'	0|1	75.4172
1	106178343	1	AAACTATGTGACTATCAAGC	-12	3'-5'	1|0	75.4968
1	106672173	1	ACCTTTCATCAGCGAAATCA	-16	3'-5'	0|1	80.4712
1	106672173	1	GATTTCGCTGATGAAAGGTC	-12	5'-3'	0|1	85.0005
1	106741138	1	ATATTACTCAGACTACTAGG	-15	5'-3'	0|1	78.1117
1	106741138	2	ATTACTCAGACTACTTAGGT	-13	5'-3'	0|1	76.9234
1	106820857	1	GTAATCCCGCATATTGAAGT	-14	3'-5'	0|1	87.6976
1	106873539	2	CTGATTGGCTGAAAGTGACG	-7	5'-3'	1|0	80.0963
1	106982386	1	ATAATGTTGTAGCAGGTATC	-3	5'-3'	0|1	80.4123
1	106982386	1	CTTCGAAATAATGTTGTAGC	-10	5'-3'	0|1	85.2615
1	107022962	1	GTGATTCAATCATCTCCCGC	-8	3'-5'	0|1	89.2393
1	107081129	1	GAGCTTCGCTCTTGTCGGCC	-5	3'-5'	0|1	88.675
1	107081129	2	ATGGAGCTTCGCTCTTGGCC	-5	3'-5'	0|1	84.4455
1	107890707	2	CAAAAAACTGGGTACCAATA	-15	3'-5'	0|1	75.1528	transcript for ENSG00000162631.14 protein_coding NTNG1
1	107931582	1	GTATAGCTAGTGCCAATCCA	-4	5'-3'	0|1	87.7199	transcript for ENSG00000162631.14 protein_coding NTNG1
1	107931582	2	GTATACTAGTGCCAATCCAA	-4	5'-3'	0|1	86.0923	transcript for ENSG00000162631.14 protein_coding NTNG1
1	107979566	1	AATGCTGCGGCCAATGTATT	-17	5'-3'	1|0	86.7292	transcript for ENSG00000162631.14 protein_coding NTNG1
1	107979566	1	GGATTGCTCTCCCAATACAT	-7	3'-5'	1|0	86.6058	transcript for ENSG00000162631.14 protein_coding NTNG1
1	108080258	1	AAGCTACACGTTAAGCCCCC	-14	5'-3'	0|1	90.0121
1	108080258	2	AGCTACACGTTAAGCCCCCC	-13	5'-3'	0|1	94.3052
1	108080285	1	GATGTGTTTCAGCCCACAAC	-11	5'-3'	0|1	81.1697
1	108080285	2	GATGTGTTTCAGCCACAACT	-11	5'-3'	0|1	76.1697
1	108138041	1	AGCAACACTGGGATATCTAG	-10	3'-5'	0|1	77.9152	transcript for ENSG00000134215.11 protein_coding VAV3
1	108218031	2	GACTATATAGCTAGTTAGAG	-14	5'-3'	1|0	80.647	transcript for ENSG00000134215.11 protein_coding VAV3
1	108611815	2	ACGGGATAGATAAGTCAAAG	-1	5'-3'	0|1	75.4935
1	108664013	1	GCGCGGGCCTGGGAGTATCC	-9	3'-5'	0|1	78.3078
1	108664013	2	GTAGCTGGAAGGGAGTATCC	-9	3'-5'	0|1	80.0196
1	108737086	1	AGCCTTGGGTTAGAGTCTAC	-20	5'-3'	1|0	78.5199	transcript for ENSG00000085491.11 protein_coding SLC25A24
1	108737086	1	GTCCTGTAGACTCTAACCCA	-18	3'-5'	1|0	83.1304	transcript for ENSG00000085491.11 protein_coding SLC25A24
1	108737086	2	GGTCTGTAGACTCTAACCCA	-18	3'-5'	1|0	76.5859	transcript for ENSG00000085491.11 protein_coding SLC25A24
1	109371970	1	ACTTCTGTAGGGTCTAGACT	-16	5'-3'	0|1	82.1647	transcript for ENSG00000162641.14 protein_coding AKNAD1
1	109371970	2	CTTCTGTAGGGTCTAGAACT	-15	5'-3'	0|1	76.9751	transcript for ENSG00000162641.14 protein_coding AKNAD1
1	109375773	2	GTCATCAAAAATGAAGCGAT	-20	5'-3'	0|1	78.2141	transcript for ENSG00000162641.14 protein_coding AKNAD1
1	109419595	1	AATGAGAGCGCCTGGAGCCG	-18	5'-3'	0|1	77.0661	transcript for ENSG00000162641.14 protein_coding AKNAD1
1	109438050	1	GAACGGGGTTCCCAACCCCT	-3	5'-3'	0|1	78.3194	transcript for ENSG00000162641.14 protein_coding AKNAD1
1	109438050	1	GTTTAATGTGTATTAGAACG	-18	5'-3'	0|1	77.6278	transcript for ENSG00000162641.14 protein_coding AKNAD1
1	109494295	1	GTATAGTAGCTAAAGGGTAC	-19	5'-3'	0|1	88.0308	transcript for ENSG00000162641.14 protein_coding AKNAD1
1	109595715	1	GGAAGTGAGGAGCGTCTGAC	-13	5'-3'	0|1	87.236
1	109622497	2	GAACTACAGGCGCCCACGCC	-7	3'-5'	0|1	86.7959
1	109628906	2	ACCGTGTTGACCTCATGGTC	-2	3'-5'	0|1	84.4295
1	109672871	1	CACTATACAACCCAGTGCAC	-3	5'-3'	1|0	80.4697	transcript for ENSG00000116299.12 protein_coding KIAA1324
1	109672871	2	ACTAATACAACCCAGTGCAC	-2	5'-3'	1|0	83.9345	transcript for ENSG00000116299.12 protein_coding KIAA1324
1	109779621	1	CTGAGAGTTGGGCCCTTTGA	-17	3'-5'	0|1	76.0079	transcript for ENSG00000031698.8 protein_coding SARS
1	109828401	2	AAGGGGTCCGTCCATTCAGT	-9	3'-5'	0|1	84.5632
1	109828401	2	CGGACCCCTTCTCTCTGACA	4	5'-3'	0|1	75.6141
1	109833136	1	ACAAAGGATGCCTTATGGCG	-1	5'-3'	1|0	91.1847
1	109833136	2	ACACAGGATGCCTTATGGCG	-3	5'-3'	1|0	91.2902
1	109895656	2	AGAGTTATGCCTAGCAGTGG	-14	3'-5'	0|1	75.6783	transcript for ENSG00000134243.7 protein_coding SORT1
1	110414138	1	GTGGAAGAAGGTGTCCGAAG	-2	5'-3'	0|1	80.0866
1	110414138	2	AAAGTGGAAGGTGTCCGAAG	-5	5'-3'	0|1	82.807
1	110610633	2	GGCTAGTCTGTCCCCGAGTT	-7	3'-5'	1|0	93.0969	transcript for ENSG00000143093.10 protein_coding STRIP1
1	110685249	1	AAGTCCATCTAGCTTCCTAT	-1	3'-5'	2|1	77.8279
1	110716409	1	GAGCGTGAATGGAGCGTGAG	7	5'-3'	0|1	76.775	transcript for ENSG00000197106.6 protein_coding SLC6A17
1	110716409	1	GGAGCGTGAATGGAGCGTGA	6	5'-3'	0|1	84.6304	transcript for ENSG00000197106.6 protein_coding SLC6A17
1	110716409	2	ACCAGATGAATGGAGCGTGA	-5	5'-3'	0|1	83.6605	transcript for ENSG00000197106.6 protein_coding SLC6A17
1	110807578	1	AATCTCAACTACTCGGAGGC	5	5'-3'	1|0	89.095	transcript for ENSG00000116396.9 protein_coding KCNC4
1	110961784	1	GGAACCCCTAGCCACTTTAT	-16	3'-5'	1|0	81.1087	transcript for ENSG00000224699.4 antisense LAMTOR5-AS1
1	110961784	1	GGGAACCCCTAGCCACTTTA	-15	3'-5'	1|0	82.5711	transcript for ENSG00000224699.4 antisense LAMTOR5-AS1
1	110961784	2	ACCAACCCCTAGCCACTTTA	-15	3'-5'	1|0	79.6696	transcript for ENSG00000224699.4 antisense LAMTOR5-AS1
1	110983706	1	AGTTGGCTGACCAGTCAAGA	-1	3'-5'	1|0	77.5085
1	110983706	2	GGCTGACCAGTCAAGAGGAC	-6	3'-5'	1|0	84.1091
1	111056179	1	ATGAGGACCCTCGACCCATG	-2	3'-5'	1|0	86.6001
1	111056179	1	CATGGGTCGAGGGTCCTCAT	1	5'-3'	1|0	85.1383
1	111056179	1	CGAGGGTCCTCATGGGTCGA	8	5'-3'	1|0	90.2505
1	111104517	1	AGACTCCCAGATAGGGCTCG	-8	5'-3'	0|1	80.7367
1	111104517	1	AGGCCTCCTCGAGCCCTATC	-2	3'-5'	0|1	85.5754
1	111104517	1	CTCCCAGATAGGGCTCGAGG	-5	5'-3'	0|1	79.5958
1	111104517	1	GGCCTCCTCGAGCCCTATCT	-3	3'-5'	0|1	82.6436
1	111104517	2	GACTCCCAGGATAGGGCTCG	-7	5'-3'	0|1	79.9592
1	111104517	2	GCCTCCTCGAGCCCTATCCT	-3	3'-5'	0|1	82.7784
1	111117196	2	AGATGGACTGACATCTGTTC	-7	5'-3'	0|1	76.1457
1	111215090	2	AGTCAGATCAGGACATCTTG	-18	5'-3'	1|0	75.2948	exon for ENSG00000177272.7 protein_coding KCNA3
1	111791877	2	GTGACACAAGAATAGGATGC	-14	3'-5'	1|0	76.9047
1	111957547	1	GGTTATCAGTCTGTGACCCC	17	3'-5'	1|0	76.7353	transcript for ENSG00000085465.11 protein_coding OVGP1
1	111957547	1	GTTATCAGTCTGTGACCCCT	16	3'-5'	1|0	76.1797	transcript for ENSG00000085465.11 protein_coding OVGP1
1	112356867	1	GTGGTGCTTATCCTAGGAGC	-17	5'-3'	0|1	77.8008	transcript for ENSG00000171385.5 protein_coding KCND3
1	112356867	2	CGTGGTGCTTATCCTAGGAA	-18	5'-3'	0|1	82.1047	transcript for ENSG00000171385.5 protein_coding KCND3
1	112799290	1	GTGGGGGAAAGACGTGTTTA	-5	5'-3'	0|1	79.2775	transcript for ENSG00000231246.1 lincRNA RP5-965F6.2
1	112799290	2	GGCAATGAAAGACGTGTTTA	-1	5'-3'	0|1	78.5203	transcript for ENSG00000231246.1 lincRNA RP5-965F6.2
1	113075817	2	ACTCAAACGTTACTGCATAA	0	3'-5'	0|1	79.616	transcript for ENSG00000007341.14 protein_coding ST7L
1	113332500	1	GGAAGGGTGCTAATGACCTG	-12	5'-3'	1|0	81.7026
1	113332500	2	GAAGGGTGCTAATTGACCTG	-11	5'-3'	1|0	77.636
1	113501882	2	GCCTGTAATCCCAGAACCTA	-16	5'-3'	0|1	75.3086	transcript for ENSG00000226419.2 antisense RP11-31F15.1
1	113501882	2	GTAATCCCAGAACCTAAGGC	-12	5'-3'	0|1	81.362	transcript for ENSG00000226419.2 antisense RP11-31F15.1
1	113501882	2	GTTCCACCTGCCTTAGGTTC	-6	3'-5'	0|1	82.7949	transcript for ENSG00000226419.2 antisense RP11-31F15.1
1	113501893	2	ACCTGAGCCTACCAAAGTTC	-17	3'-5'	0|1	76.6611	transcript for ENSG00000226419.2 antisense RP11-31F15.1
1	113511485	2	GTCGCAGCTATGGAGGCTTG	-9	5'-3'	0|1	75.9189	transcript for ENSG00000226419.2 antisense RP11-31F15.1
1	113541794	2	GCCTGTCTACCGAAAACTAA	-4	3'-5'	0|1	85.4395	enhancer element_1672
1	113563769	2	AGGCATAATCGCTTGAACCC	-3	5'-3'	0|1	86.8105	transcript for ENSG00000236066.1 lincRNA RP11-389O22.1
1	113616382	1	CTCTGAAGGAAACTGCCGTC	-4	5'-3'	1|0	81.9925	transcript for ENSG00000198799.7 protein_coding LRIG2
1	113659065	2	ACGGTAATGACTGTTGTTTA	-9	5'-3'	0|1	79.1135	transcript for ENSG00000198799.7 protein_coding LRIG2
1	113670800	1	CTGCCCATGGGAGAACACTT	-16	3'-5'	1|0	75.4481	exon for ENSG00000198799.7 protein_coding LRIG2
1	113711288	1	ATGGCATAGACCCGGGAGGC	-21	5'-3'	1|0	78.4557
1	113713349	1	GGACTGCAGGAGTCCACGCA	22	3'-5'	1|0	75.9311
1	113941748	1	CAGCTAGACTGTCAGTGTAG	-3	5'-3'	1|0	77.0689	transcript for ENSG00000081026.14 protein_coding MAGI3
1	113941748	2	AGCTTAGACTGTCAGTGTAG	-2	5'-3'	1|0	75.7911	transcript for ENSG00000081026.14 protein_coding MAGI3
1	113966876	1	GATGTCAGTGGCGGCCCATG	-5	3'-5'	1|0	80.5964	transcript for ENSG00000081026.14 protein_coding MAGI3
1	114006024	1	CTGAGAGGGTGCAACCAGTG	-11	5'-3'	1|0	78.0903	transcript for ENSG00000081026.14 protein_coding MAGI3
1	114240319	2	CATAAGCTGAGTTAAATGCC	-9	3'-5'	0|1	78.1487	transcript for ENSG00000116793.11 protein_coding PHTF1
1	114475132	1	GCTAGGACTACAGGCACTAC	-10	5'-3'	0|1	84.7938	transcript for ENSG00000163349.17 protein_coding HIPK1
1	114475132	2	CTAGGACTACAAGGCACTAC	-9	5'-3'	0|1	83.9216	transcript for ENSG00000163349.17 protein_coding HIPK1
1	114521692	1	CTGAAAACCCACTCTATTGC	-13	5'-3'	0|1	79.3629
1	114521692	2	GCTGAAAACCCACTCTTGCA	-14	5'-3'	0|1	76.7185
1	114521692	2	GGCTGAAAACCCACTCTTGC	-15	5'-3'	0|1	78.7838
1	114856588	1	GGGAGGCCTTACAATCATGG	-3	5'-3'	0|1	82.9011
1	114856588	2	GCTGGGGAGCCTTACAATCA	-7	5'-3'	0|1	83.7812
1	114856588	2	GGGGAGCCTTACAATCATGG	-4	5'-3'	0|1	84.4978
1	115043985	2	ATAGCTGGCAAGTTTGGTGC	-11	5'-3'	0|1	77.0625	transcript for ENSG00000197323.6 protein_coding TRIM33
1	115048145	1	GGCAACAATCATGTGTAAGT	-10	3'-5'	0|1	82.1063	transcript for ENSG00000197323.6 protein_coding TRIM33
1	115048145	2	ATGGCAACAATCGTGTAAGT	-10	3'-5'	0|1	84.9361	transcript for ENSG00000197323.6 protein_coding TRIM33
1	115048145	2	GATGGCAACAATCGTGTAAG	-9	3'-5'	0|1	92.6587	transcript for ENSG00000197323.6 protein_coding TRIM33
1	115048145	2	GCAACAATCGTGTAAGTGGG	-13	3'-5'	0|1	87.747	transcript for ENSG00000197323.6 protein_coding TRIM33
1	115302096	1	GGAGTTCACTCGTGTTGCCT	-3	5'-3'	1|0	86.9479
1	115344126	1	GGGTCTCACCTCTAACACCC	-12	3'-5'	1|0	83.1032
1	115616147	1	GACTGTGCACTCACGAGGTG	-3	3'-5'	1|0	80.3148	transcript for ENSG00000134198.5 protein_coding TSPAN2
1	115616147	2	CGAGGTCACGAGGTGTGGGT	-8	3'-5'	1|0	89.5452	transcript for ENSG00000134198.5 protein_coding TSPAN2
1	115616147	2	CTCACGAGGTCACGAGGTGT	-4	3'-5'	1|0	87.1068	transcript for ENSG00000134198.5 protein_coding TSPAN2
1	115968465	1	CTCTTGGATTGGTAGCTGCA	0	5'-3'	1|0	76.4798
1	115968465	1	GCTACCAATCCAAGAGCAAT	-7	3'-5'	1|0	80.7506
1	115968465	2	AGCTACCAATCCAAGGCAAT	-7	3'-5'	1|0	75.7511
1	115968465	2	GAACACCAATTGCCTTGGAT	-12	5'-3'	1|0	75.3868
1	116010974	1	GTACCTCCTCTTACTACCTG	-9	3'-5'	0|1	77.4076
1	116010974	2	ACCTCCTCTTAACTACCTGT	-10	3'-5'	0|1	79.5293
1	116010974	2	GAATCCCACAGGTAGTTAAG	-14	5'-3'	0|1	76.9748
1	116056497	1	AGCCAAGGTACAATTGGGTT	-10	5'-3'	0|1	78.8981
1	116056497	1	GAGTCAGCCAAGGTACAATT	-15	5'-3'	0|1	77.8789
1	116056497	1	GCCAAGGTACAATTGGGTTT	-9	5'-3'	0|1	79.9821
1	116056497	1	GGAGTCAGCCAAGGTACAAT	-16	5'-3'	0|1	79.5533
1	116056497	2	ACCCCAAACCCAATGTACCT	-8	3'-5'	0|1	81.6993
1	116056497	2	AGCCAAGGTACATTGGGTTT	-10	5'-3'	0|1	76.4614
1	116056497	2	AGGAGTCAGCCAAGGTACAT	-17	5'-3'	0|1	77.3969
1	116056497	2	CAGCCAAGGTACATTGGGTT	-11	5'-3'	0|1	75.9299
1	116056497	2	GGAGTCAGCCAAGGTACATT	-16	5'-3'	0|1	76.5242
1	116129757	1	CAGGTATCACAGGTGATGTC	-3	5'-3'	1|0	76.2184
1	116129757	1	CTCAAATGTACAGGTATCAC	-13	5'-3'	1|0	79.6034
1	116172063	1	GGAAGCAGGCTGGGATACGG	-4	3'-5'	0|1	75.1048
1	116172063	2	GAAGCAGGCTGGGATACCGG	-4	3'-5'	0|1	81.861
1	116223381	1	GTTTAGGAGCTCCCTTGTCT	3	5'-3'	0|1	76.6955	transcript for ENSG00000173218.10 protein_coding VANGL1
1	116223381	2	ACAAGGGAGCTCCTATCCAC	-7	3'-5'	0|1	86.6672	transcript for ENSG00000173218.10 protein_coding VANGL1
1	116261896	2	GTCGGATTTGTGTAATAAGC	-17	3'-5'	0|1	80.5338	transcript for ENSG00000118729.10 protein_coding CASQ2
1	116405958	2	GACACTGAGGACGTCCAGTC	-14	5'-3'	1|0	84.8578
1	116484160	1	ACTGGACTCCTACTGCAAGT	-8	5'-3'	0|1	79.1227
1	116484160	1	CACTGGACTCCTACTGCAAG	-9	5'-3'	0|1	76.1362
1	116484160	1	GTAGGAGTCCAGTGTTACTG	-18	3'-5'	0|1	75.9836
1	116829087	2	ACATACGGATTGAATGAGCA	-5	5'-3'	0|1	78.9002
1	117290673	2	AGGAACTTATTGAGTAGGGT	-12	3'-5'	1|0	79.3863
1	117376983	1	ATATTATTTGCCACCCATAC	-14	3'-5'	0|1	76.1233
1	117376983	2	AAGATATTTGCCACCCATAC	-14	3'-5'	0|1	82.5312
1	117508245	1	GTCCCTGATCACTCTATTTA	-1	5'-3'	0|1	79.339	transcript for ENSG00000134247.9 protein_coding PTGFRN
1	117528810	1	AAGGAGCATGGGTACTTATG	-8	5'-3'	0|1	77.5912	transcript for ENSG00000134247.9 protein_coding PTGFRN
1	117528810	1	CAAGGAGCATGGGTACTTAT	-9	5'-3'	0|1	82.4028	transcript for ENSG00000134247.9 protein_coding PTGFRN
1	117528810	2	AAGGAGCATGGGGTACTTAT	-8	5'-3'	0|1	81.8191	transcript for ENSG00000134247.9 protein_coding PTGFRN
1	117528810	2	AGGAGCATGGGGTACTTATG	-7	5'-3'	0|1	80.6885	transcript for ENSG00000134247.9 protein_coding PTGFRN
1	117528810	2	ATAAGTACCCCATGCTCCTT	-11	3'-5'	0|1	76.7496	transcript for ENSG00000134247.9 protein_coding PTGFRN
1	117528810	2	CAAGGAGCATGGGGTACTTA	-9	5'-3'	0|1	75.5968	transcript for ENSG00000134247.9 protein_coding PTGFRN
1	117528810	2	CATAAGTACCCCATGCTCCT	-10	3'-5'	0|1	77.0818	transcript for ENSG00000134247.9 protein_coding PTGFRN
1	117602334	1	GGAACTGAAACGGCTCTGAT	-1	3'-5'	1|0	83.3776
1	117732532	1	ACCAAGGCATGAGCCTACCT	-1	3'-5'	1|0	77.2036	transcript for ENSG00000134258.12 protein_coding VTCN1
1	117732532	1	ACCAAGGTAGGCTCATGCCT	-2	5'-3'	1|0	82.7286	transcript for ENSG00000134258.12 protein_coding VTCN1
1	117732532	1	GCATGAGCCTACCTTGGTCT	-7	3'-5'	1|0	77.6094	transcript for ENSG00000134258.12 protein_coding VTCN1
1	117918936	1	CAAACTCACTTGAGTCATGC	-11	3'-5'	1|0	77.0728	transcript for ENSG00000198162.8 protein_coding MAN1A2
1	117970362	2	GAGAAATGACACGTTATATG	-11	5'-3'	1|0	75.0425	transcript for ENSG00000198162.8 protein_coding MAN1A2
1	118046685	1	GATGGTTTAGAACATCTGCC	0	5'-3'	0|1	75.0908	transcript for ENSG00000198162.8 protein_coding MAN1A2
1	118046685	2	AACCACCCAGCAGTAATAAG	-17	3'-5'	0|1	80.6069	transcript for ENSG00000198162.8 protein_coding MAN1A2
1	118046685	2	ACCCAGCAGTAATAAGGGGC	-21	3'-5'	0|1	79.117	transcript for ENSG00000198162.8 protein_coding MAN1A2
1	118051399	1	ATGTGTTACGTATGCACATG	-15	3'-5'	1|0	77.419	transcript for ENSG00000198162.8 protein_coding MAN1A2
1	118081647	2	AATAGTCCTAGCTACTCCGA	1	5'-3'	0|1	93.865
1	118923156	1	CAGGATTATTTCTCGTCTTG	-4	5'-3'	0|1	83.4697
1	118975117	1	CTCTCTGACCTAATGATACT	2	5'-3'	0|1	75.8465
1	118975117	2	GCCTCTGACCTAATGATACT	-1	5'-3'	0|1	81.4031
1	119007459	1	CAATAGTGCAATATCAGCCC	-16	3'-5'	1|0	77.5785
1	119007459	2	GCAATATGCAATATCAGCCC	-16	3'-5'	1|0	84.0376
1	119025561	1	CTAAGGGGGTACAATCTATG	1	3'-5'	0|1	87.752
1	119134366	2	GTGATGTCCAATATGAATCT	-4	5'-3'	1|0	75.1621
1	119544668	1	AGAGCACCCTTAACCTCACC	11	5'-3'	0|1	77.4773
1	119544668	2	ACAGCACCCTTAACCTCACC	-1	5'-3'	0|1	77.3046
1	119615461	2	CAAAGCGATACCACACATCA	-16	3'-5'	0|1	76.0153	transcript for ENSG00000116874.7 protein_coding WARS2
1	119648847	1	GGTGATATATATGTGGGGAC	0	3'-5'	0|1	77.6206	transcript for ENSG00000116874.7 protein_coding WARS2
1	119732502	1	ACTACCCCACGTCTCATACA	-9	3'-5'	1|0	81.1356	transcript for ENSG00000231365.1 antisense RP11-418J17.1
1	119732502	2	CAAACTACCCCACTCATACA	-9	3'-5'	1|0	86.8661	transcript for ENSG00000231365.1 antisense RP11-418J17.1
1	119732502	2	GCAAACTACCCCACTCATAC	-8	3'-5'	1|0	85.1303	transcript for ENSG00000231365.1 antisense RP11-418J17.1
1	119846997	1	ATCTCAAGGGGATTATCGTG	-2	3'-5'	0|1	91.596	transcript for ENSG00000227712.1 lincRNA RP11-418J17.3
1	119846997	1	CACGATAATCCCCTTGAGAT	1	5'-3'	0|1	86.0151	transcript for ENSG00000227712.1 lincRNA RP11-418J17.3
1	119846997	1	CGTGAGGACCAAAAGTGATA	-18	3'-5'	0|1	81.3384	transcript for ENSG00000227712.1 lincRNA RP11-418J17.3
1	119846997	2	GCTACCTATCTCAAGGGGAT	-2	3'-5'	0|1	84.8712	transcript for ENSG00000227712.1 lincRNA RP11-418J17.3
1	119858223	1	AGTATTCTGGCAACTTAGGC	-13	5'-3'	1|0	80.507	transcript for ENSG00000227712.1 lincRNA RP11-418J17.3
1	119858223	1	GTGCAGTATTCTGGCAACTT	-17	5'-3'	1|0	77.6325	transcript for ENSG00000227712.1 lincRNA RP11-418J17.3
1	119994503	1	ATCGATCAATCATGGGTAAA	-12	5'-3'	0|1	78.3931
1	120005060	1	ATGATGCCAGTTTCACGAAG	-6	5'-3'	0|1	86.7747	exon for ENSG00000235595.1 pseudogene GAPDHP23
1	120005060	1	CATGATGCCAGTTTCACGAA	-7	5'-3'	0|1	81.1393	exon for ENSG00000235595.1 pseudogene GAPDHP23
1	120005060	2	ATGATGCCACAGTTTCACGA	-6	5'-3'	0|1	83.6451	exon for ENSG00000235595.1 pseudogene GAPDHP23
1	120161600	2	AGAATGGGGGGGTCTCTAAT	-4	5'-3'	0|1	79.1521
1	120165030	1	CTTTGAGGAAGGGCAGTTCG	-13	3'-5'	0|1	76.4466	transcript for ENSG00000143067.4 protein_coding ZNF697
1	120166992	2	GCCCCCCTAGCTAGGACCCG	-11	5'-3'	0|1	85.2819	transcript for ENSG00000143067.4 protein_coding ZNF697
1	120166992	2	GCCTCGGGTCCTAGCTAGGG	-10	3'-5'	0|1	84.8061	transcript for ENSG00000143067.4 protein_coding ZNF697
1	120166992	2	GGGTCCTAGCTAGGGGGGCC	-15	3'-5'	0|1	75.0863	transcript for ENSG00000143067.4 protein_coding ZNF697
1	120166992	2	GGTCCTAGCTAGGGGGGCCT	-16	3'-5'	0|1	80.8341	transcript for ENSG00000143067.4 protein_coding ZNF697
1	120167000	2	AGATGGCTCTGCTAGGCATC	-4	3'-5'	0|1	76.2332	transcript for ENSG00000143067.4 protein_coding ZNF697
1	120167000	2	AGGCATCGGGTCCAGCTAGG	-17	3'-5'	0|1	80.3927	transcript for ENSG00000143067.4 protein_coding ZNF697
1	120167000	2	CTAGGCATCGGGTCCAGCTA	-15	3'-5'	0|1	86.7843	transcript for ENSG00000143067.4 protein_coding ZNF697
1	120167000	2	GCTAGGCATCGGGTCCAGCT	-14	3'-5'	0|1	76.5662	transcript for ENSG00000143067.4 protein_coding ZNF697
1	120174206	1	GCCCAAGCGGGGCCCAAGCG	1	3'-5'	0|1	76.7534	transcript for ENSG00000143067.4 protein_coding ZNF697
1	120217618	1	AGGCTACTACTGGCCTCTAG	-12	5'-3'	0|1	79.5875	transcript for ENSG00000092621.7 protein_coding PHGDH
1	120217618	2	GTGGTGAGGCTACTACTGGG	-18	5'-3'	0|1	80.3832	transcript for ENSG00000092621.7 protein_coding PHGDH
1	120217618	2	GTGGTGGTGAGGCTACTACT	-21	5'-3'	0|1	86.3366	transcript for ENSG00000092621.7 protein_coding PHGDH
1	120220467	1	ATATAAGTATGTGTACATCG	1	3'-5'	0|1	80.1772	transcript for ENSG00000092621.7 protein_coding PHGDH
1	120267597	1	ATCCTGTAGAGTCTACATAT	1	3'-5'	1|0	80.5742	transcript for ENSG00000092621.7 protein_coding PHGDH
1	120292569	1	GTCAACTGAAGGCAGCTACC	-20	5'-3'	0|1	80.0043	transcript for ENSG00000134240.7 protein_coding HMGCS2
1	120292569	2	AAGGCAGCTACCTTCATATA	-12	5'-3'	0|1	75.0103	transcript for ENSG00000134240.7 protein_coding HMGCS2
1	120292569	2	CTTATATGAACCCTATATGA	-2	3'-5'	0|1	78.466	transcript for ENSG00000134240.7 protein_coding HMGCS2
1	120292569	2	GAAGGCAGCTACCTTCATAT	-13	5'-3'	0|1	79.6147	transcript for ENSG00000134240.7 protein_coding HMGCS2
1	121170992	2	AGGTGCCAAGCTACAGTAGC	16	5'-3'	0|1	84.0536	transcript for ENSG00000227082.1 lincRNA AL592494.5
1	121252474	1	CTTCTAGGCAGGGATAATAG	-1	3'-5'	0|1	81.443
1	142541536	2	ACAGTGAGATAGCCCGTCAA	-7	5'-3'	1|0	92.9333
1	142541536	2	GAGATAGCCCGTCAAAGGAA	-2	5'-3'	1|0	76.1921
1	142635221	2	AGGTACAACTGAGCCTGCGG	-17	5'-3'	1|0	80.4242	transcript for ENSG00000230880.2 lincRNA RP11-417J8.3
1	142910967	2	ACCCCCAACCTTGTCTAGAC	0	3'-5'	0|1	83.5411
1	143346763	2	ACAGTAATATCCTCTCCCCC	-16	5'-3'	0|1	75.1996
1	143346763	2	ATCCTCTCCCCCCGGATATT	-8	5'-3'	0|1	90.3704
1	143388748	2	GCTGGCATCGGCTGTAAACT	-4	5'-3'	0|1	86.1408	transcript for ENSG00000185044.10 lincRNA RP11-435B5.4
1	143418479	2	GTGAGGCCTATTTAGTGGGG	-15	5'-3'	0|1	86.087	transcript for ENSG00000185044.10 lincRNA RP11-435B5.4
1	143656881	2	CTCAGAGTCCAAGTACTCGA	-8	5'-3'	1|0	91.3097	transcript for ENSG00000223804.1 lincRNA RP6-206I17.1
1	143656881	2	CTCTGAAGCCTTCGAGTACT	0	3'-5'	1|0	90.0575	transcript for ENSG00000223804.1 lincRNA RP6-206I17.1
1	143656882	2	CAACTCGAAGGCTTCAGAGC	-1	5'-3'	1|0	75.3681	transcript for ENSG00000223804.1 lincRNA RP6-206I17.1
1	143666984	2	GGGCACACTACTTGAGGTAC	1	3'-5'	1|0	88.9802	transcript for ENSG00000223804.1 lincRNA RP6-206I17.1
1	144593874	2	CGGCACGGATGCCGTCTGGA	0	5'-3'	1|0	86.7768	exon for ENSG00000225241.3 pseudogene RP11-640M9.2
1	144685602	2	GGAGAATGGCGTGAACCCGG	-17	5'-3'	1|0	82.4332
1	144691189	1	GAGCCCTCTTACATTCTATT	-9	5'-3'	1|0	75.0054
1	144849813	2	ATGGAGACGTGTAACTCTCA	-7	3'-5'	1|0	84.0439	transcript for ENSG00000178104.15 protein_coding PDE4DIP
1	144849813	2	GATGGAGACGTGTAACTCTC	-6	3'-5'	1|0	89.0339	transcript for ENSG00000178104.15 protein_coding PDE4DIP
1	144880205	1	AATTGACCTTAGTACCTGAT	-5	5'-3'	1|0	81.2187	transcript for ENSG00000178104.15 protein_coding PDE4DIP
1	144880205	1	ACCTTAGTACCTGATGGGGT	0	5'-3'	1|0	84.147	transcript for ENSG00000178104.15 protein_coding PDE4DIP
1	144880205	1	ATTGACCTTAGTACCTGATG	-4	5'-3'	1|0	81.0898	transcript for ENSG00000178104.15 protein_coding PDE4DIP
1	144880205	2	GACTTAGTACCTGATGGGGT	-1	5'-3'	1|0	78.3232	transcript for ENSG00000178104.15 protein_coding PDE4DIP
1	144912929	1	GTGACGGATGTGTTAATTTG	-16	5'-3'	1|0	77.9818	transcript for ENSG00000178104.15 protein_coding PDE4DIP
1	145112049	1	CACACCACCACACTTTAGCC	-11	3'-5'	0|1	82.0073	transcript for ENSG00000223380.3 processed_transcript SEC22B
1	145112049	2	ACCACCACCACACTTTAGCC	-11	3'-5'	0|1	78.7609	transcript for ENSG00000223380.3 processed_transcript SEC22B
1	145183391	2	GCTAAACATTGTCATGCTCC	-4	3'-5'	1|0	78.496
1	145231553	2	ATATGCTATGGAACCCTTCA	-12	5'-3'	1|0	80.8718	transcript for ENSG00000213240.7 protein_coding NOTCH2NL
1	145231553	2	GATATGCTATGGAACCCTTC	-13	5'-3'	1|0	86.6496	transcript for ENSG00000213240.7 protein_coding NOTCH2NL
1	145231553	2	GTTTCACCGACATCCCTGAA	1	3'-5'	1|0	76.2176	transcript for ENSG00000213240.7 protein_coding NOTCH2NL
1	146771459	2	CAGCCTCCCAAAGTGCCTAT	-6	3'-5'	0|1	76.648
1	146771459	2	GCTCATGCCTATAGGCACTT	-13	5'-3'	0|1	83.1361
1	146913979	2	GTGTCCACATTTGAATTGGT	-8	5'-3'	2|1	80.5395
1	147168495	1	GATACCACATCATACCCATT	-3	3'-5'	0|1	75.6264
1	147168495	2	ACCCATCATACCCATTAGGA	-7	3'-5'	0|1	76.8879
1	147168495	2	GCCATCCTAATGGGTATGAT	-8	5'-3'	0|1	85.6879
1	147182166	2	GCCATTTCAGACTATCACAT	-2	5'-3'	0|1	75.9132
1	147182166	2	GGCCATTTCAGACTATCACA	-3	5'-3'	0|1	82.2235
1	147298952	2	AATTAGCATTTGCAGCGACC	-17	3'-5'	1|0	88.762
1	147382457	2	ATAAATAAGACCGATTCCAT	-14	3'-5'	1|0	77.3126
1	147391196	1	GAAGGGATTCATCATGCACC	-21	5'-3'	1|0	80.6001
1	147743438	1	GCAAATCTTAGTAGCTGTTC	-9	3'-5'	0|1	85.0514
1	147743438	2	GGAGTCCCAGCAAGCTGTTC	-9	3'-5'	0|1	80.4155
1	147795394	2	GGCACGTGAGAATTGTAGGC	-15	5'-3'	0|1	85.2112
1	147815788	2	GTGAGAATGTAGGGGCGGTT	-6	3'-5'	1|0	87.3285	transcript for ENSG00000224481.1 lincRNA RP11-495P10.3
1	147856302	2	AGGACCGCTCAAGGCCTTCC	-14	3'-5'	1|0	78.4028	transcript for ENSG00000215863.2 lincRNA RP11-495P10.2
1	148001177	2	AATAGGTCAGTAATATCCCG	-2	5'-3'	0|1	85.9245
1	148549566	2	CAATGTCCTACAAGAGACGG	-17	5'-3'	1|0	83.874
1	148549566	2	CATGTCCCCCCGTCTCTTGT	-11	3'-5'	1|0	81.7219
1	148552065	1	CTGGAACCTAAAGAACCCCC	-14	5'-3'	0|1	81.3112
1	148552065	1	GCTGGAACCTAAAGAACCCC	-15	5'-3'	0|1	79.7486
1	148552065	2	ACCTTGCCCCGGGGTTCTTT	-8	3'-5'	0|1	80.6946
1	148552065	2	GCTGGAACCTAAAGAACCCC	-15	5'-3'	0|1	79.7486
1	148552353	1	CTACATCTAGGATGTATGCG	-15	5'-3'	0|1	91.4572
1	148552353	2	CTACATCTAGGATGTAGCGG	-15	5'-3'	0|1	93.3218
1	148555706	2	CAGCCTGCAGTCCTAAGCGC	-1	5'-3'	0|1	77.4379
1	148855272	1	AGAAAGCCGCAGCGGCGATG	25	5'-3'	1|0	83.0326	transcript for ENSG00000231448.1 pseudogene RP11-763B22.9
1	148855272	1	CAGAAAGCCGCAGCGGCGAT	24	5'-3'	1|0	82.8545	transcript for ENSG00000231448.1 pseudogene RP11-763B22.9
1	149287048	2	ATTCACAAGCTCAGCCCGAT	-5	5'-3'	0|1	93.541
1	149287127	2	AGGTGTACACAGCCGTGCAG	0	3'-5'	0|1	81.8623
1	149293646	2	GGAGAGGTGTCGATGTCGAT	-1	3'-5'	1|0	93.9916
1	149293646	2	GGGAGAGGTGTCGATGTCGA	0	3'-5'	1|0	91.4581
1	149294657	1	AAAGAACCTCTTGCCTTGAC	-2	5'-3'	1|0	75.3413
1	149302005	2	ACATGTAAGATAGGTCTCAA	-4	3'-5'	0|1	78.788
1	149646502	1	CAAAAGGCCCTTCAATGATA	-4	3'-5'	0|1	78.8371
1	149748315	1	CTGGGCTTCCTGAGTCAAAC	0	3'-5'	0|1	79.9799
1	150272310	1	CTGCCTATTAGGATCACCTA	1	5'-3'	1|0	83.5398	transcript for ENSG00000187145.10 protein_coding MRPS21
1	150272310	1	GCTGCCTATTAGGATCACCT	0	5'-3'	1|0	87.3407	transcript for ENSG00000187145.10 protein_coding MRPS21
1	150272310	1	GGTGATCCTAATAGGCAGCC	-4	3'-5'	1|0	82.5994	transcript for ENSG00000187145.10 protein_coding MRPS21
1	150272310	2	GGTGATCCTAATAGGCACCA	-5	3'-5'	1|0	79.1797	transcript for ENSG00000187145.10 protein_coding MRPS21
1	150272310	2	GTGCCTATTAGGATCACCTA	0	5'-3'	1|0	81.1515	transcript for ENSG00000187145.10 protein_coding MRPS21
1	150278298	1	ATATATAGGGGGCAATTGTT	-5	5'-3'	1|0	78.1321	transcript for ENSG00000187145.10 protein_coding MRPS21
1	150284493	2	GCATGGTAGTTTATGAGTAG	-11	5'-3'	1|0	77.1202
1	150325003	2	AAAATCAGCTGGGCGTGTAG	-15	5'-3'	0|1	87.1202	transcript for ENSG00000117360.8 protein_coding PRPF3
1	150325003	2	AAATCAGCTGGGCGTGTAGC	-14	5'-3'	0|1	86.7313	transcript for ENSG00000117360.8 protein_coding PRPF3
1	150459692	1	CGGGTCTGGGGGAATAGCGA	-11	5'-3'	0|1	85.2736
1	150459692	2	CTCGCTATCCCCCAGACCCG	-14	3'-5'	0|1	81.2025
1	150507691	2	GCCCTTTGTCAACACAAGTT	-18	3'-5'	0|1	76.0218
1	150522471	1	GCTCTGAGGGCCCGGGAATT	-3	5'-3'	0|1	77.3428	transcript for ENSG00000237781.2 antisense RP11-54A4.2
1	150542470	1	ATCACCCGAGGTCACCAGTG	-20	3'-5'	0|1	82.8764
1	150542470	2	CTGAGGTGGGTAGACACCCG	-8	3'-5'	0|1	84.3436
1	150542470	2	GACACCCGAGGTCACCAGTG	-20	3'-5'	0|1	79.1565
1	150692541	1	ATATATATGGTGGGCACCTG	-14	3'-5'	1|0	76.8956	transcript for ENSG00000143452.11 protein_coding HORMAD1
1	150712372	1	AGGCATAGAAGAACTTCGGC	-9	3'-5'	1|0	76.2986	transcript for ENSG00000163131.6 protein_coding CTSS
1	150712372	2	GCACTGGAGGCATAGAACTT	-5	3'-5'	1|0	89.6524	transcript for ENSG00000163131.6 protein_coding CTSS
1	150877859	2	AGGTGATTCCCCCCCAACCT	-5	5'-3'	1|0	75.8756
1	150878099	1	CGCCATCTTCTCATGAGATT	1	3'-5'	0|1	84.8399
[truncated: 26,514 more rows]
