# Supplementary figures and images for: Comprehensive, integrated, and phased whole-genome analysis of the primary ENCODE cell line K562 (part 1 of 6)
Source: HighWire-hosted journal article supplement (doi:10.1101/gr.234948.118), 2019-02-08

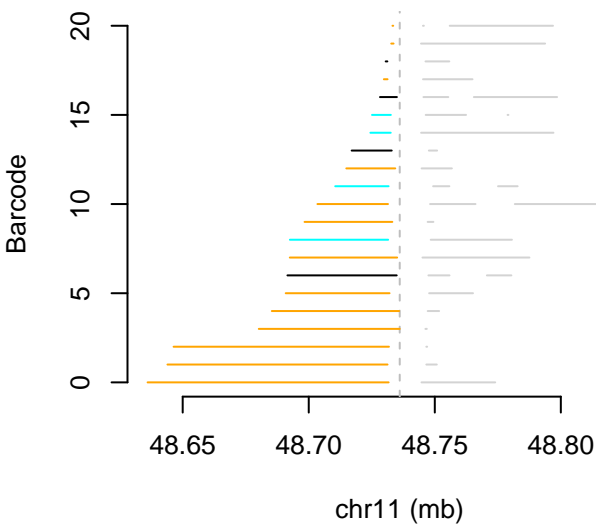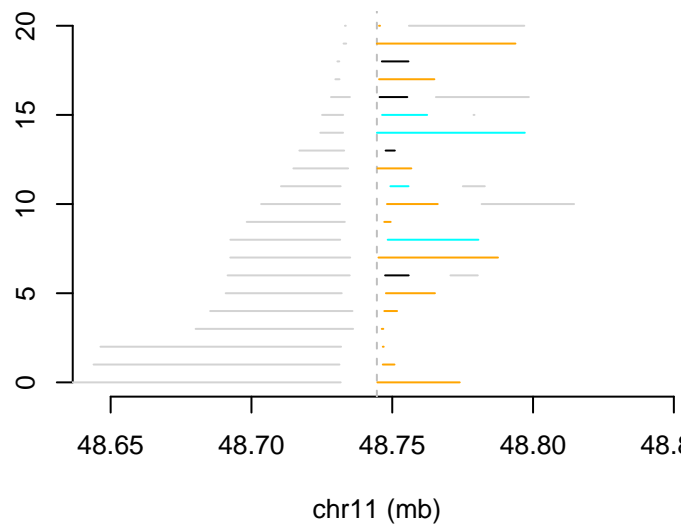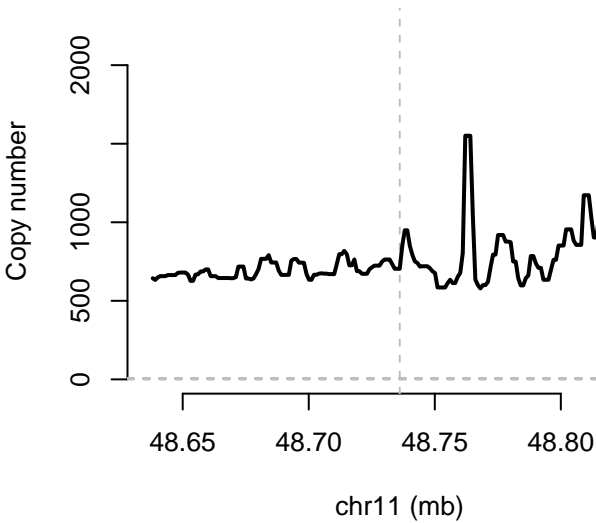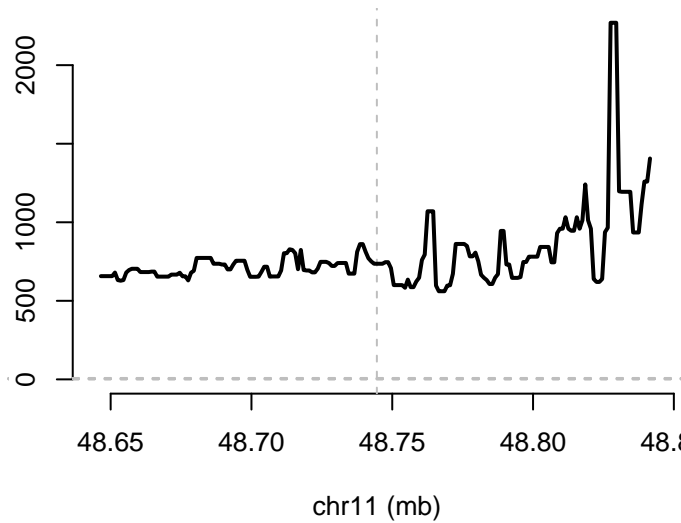

K562 chr11:48,736,096::chr11:48,744,540+-

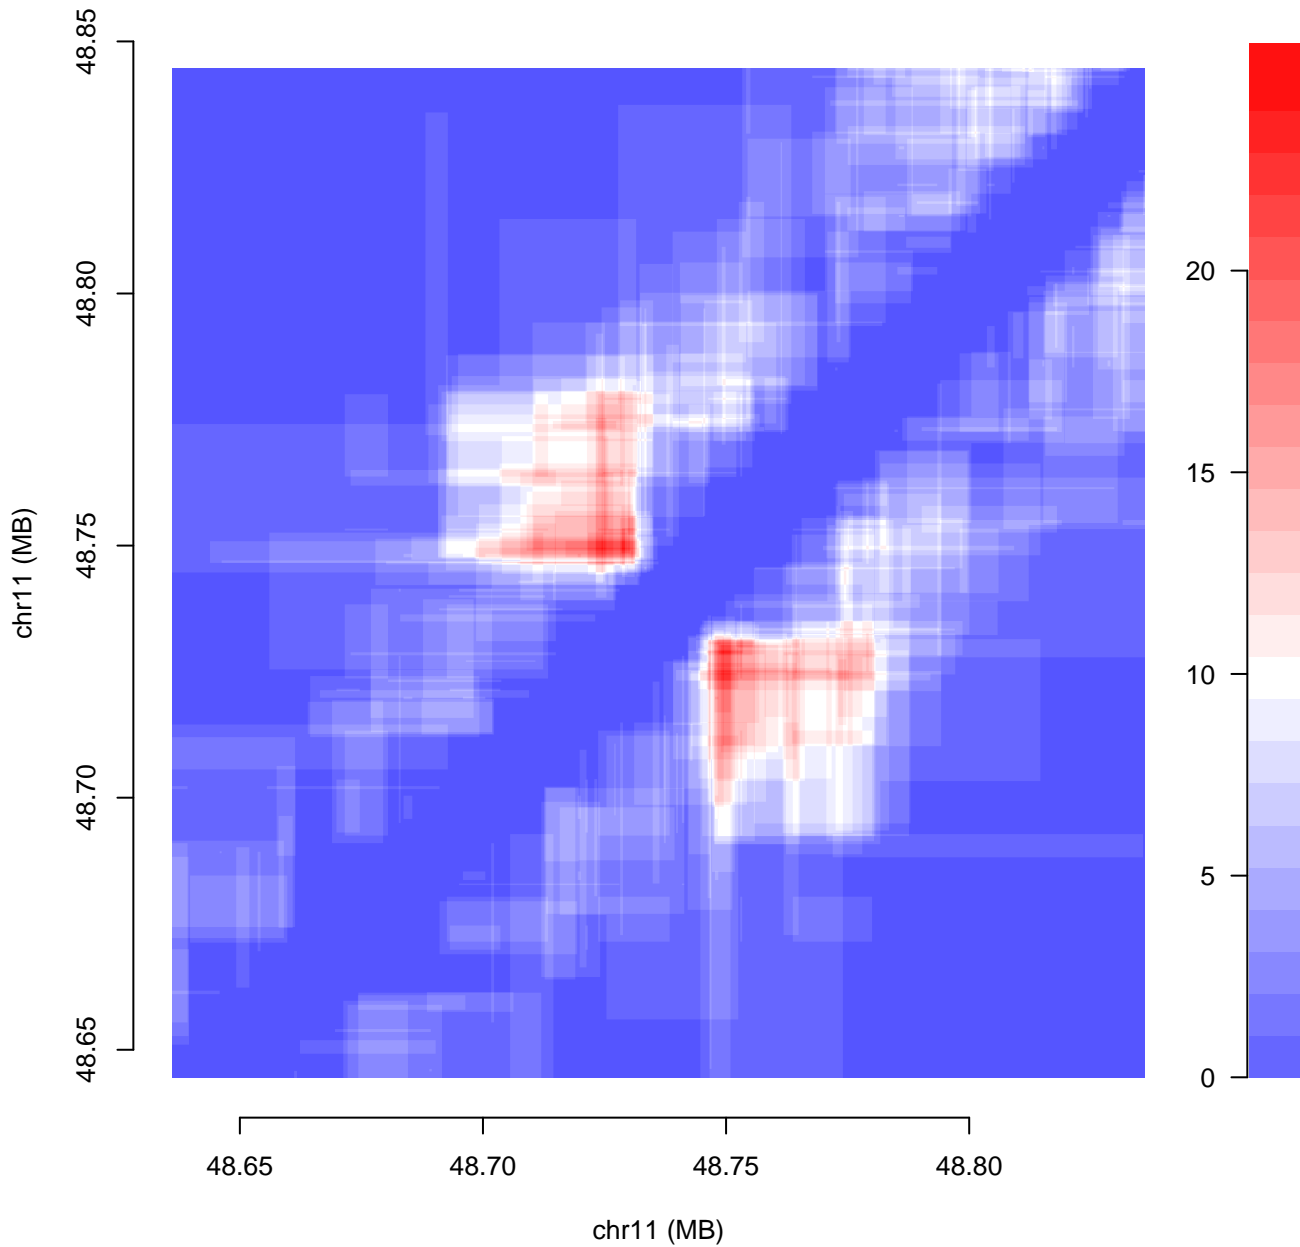

Supplement: Supplemental_Data.zip [file event_0.pdf › event_0.pdf]

Barcode

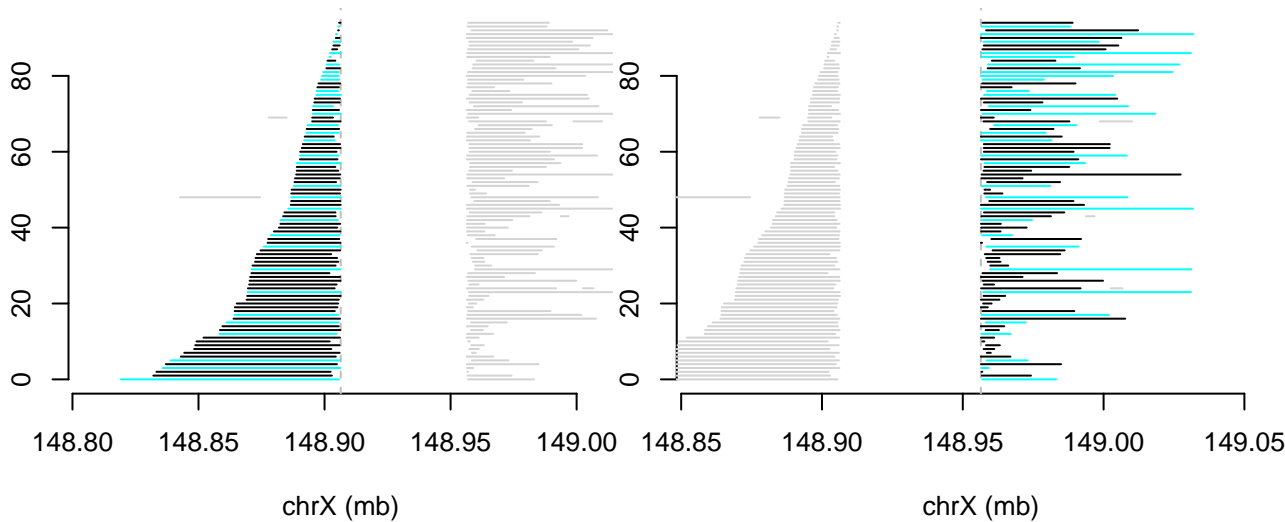

Copy number

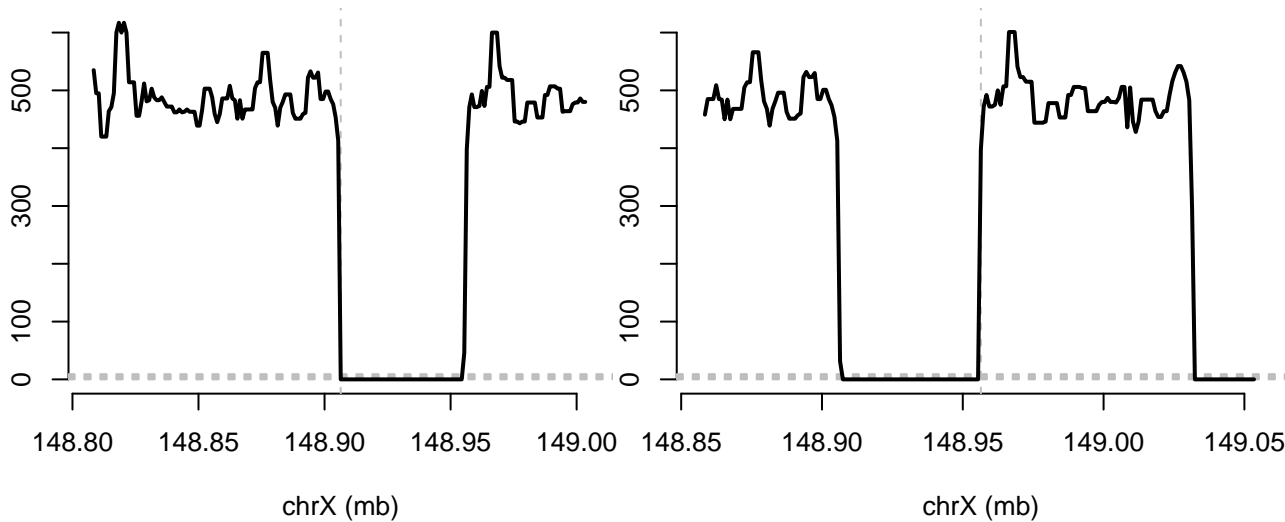

K562 chrX:148,906,424::chrX:148,956,422+-

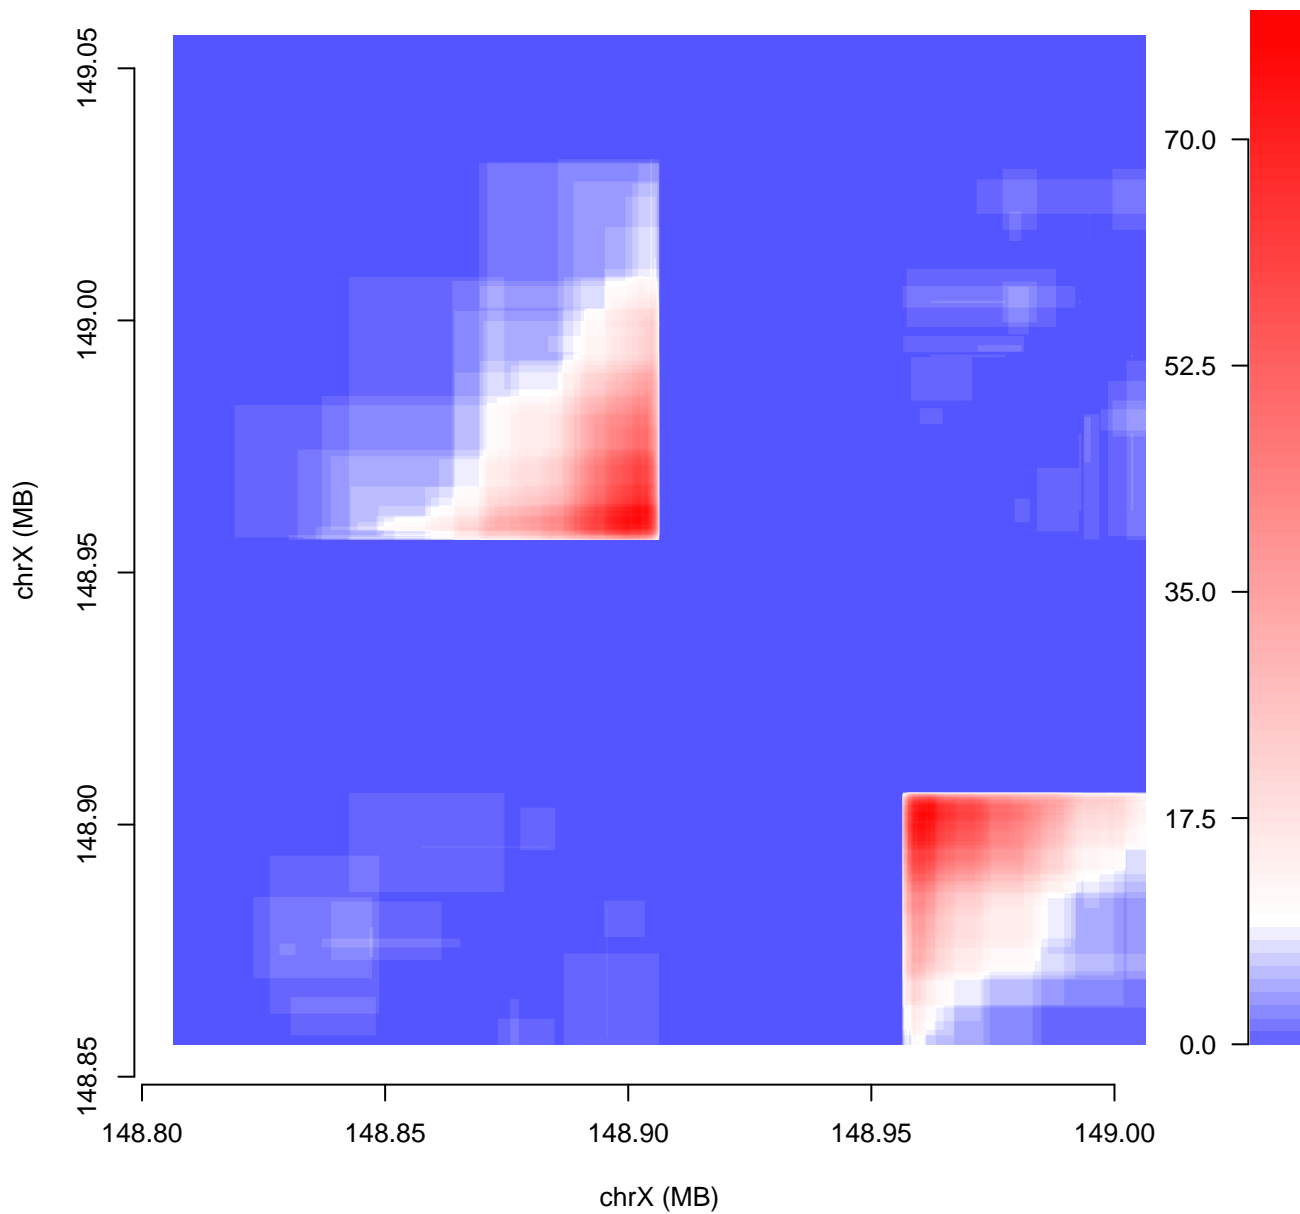

Supplement: Supplemental_Data.zip [file event_1.pdf › event_1.pdf]

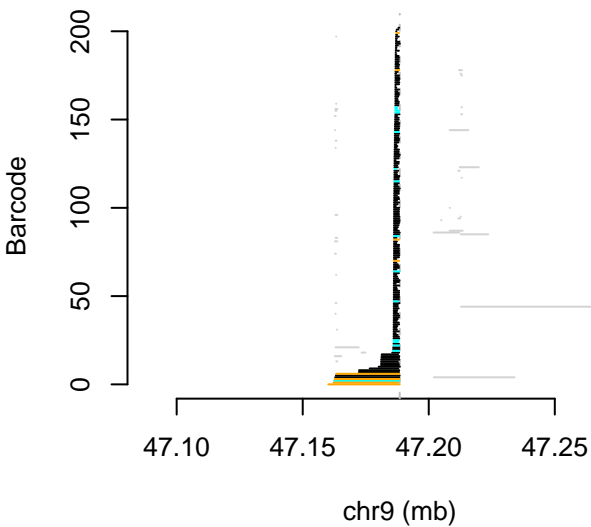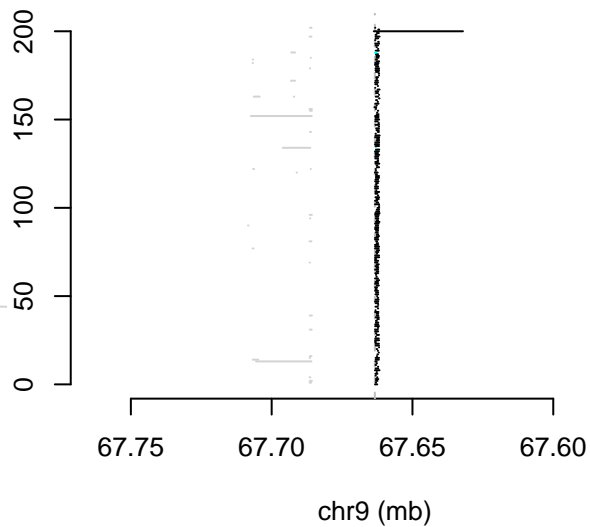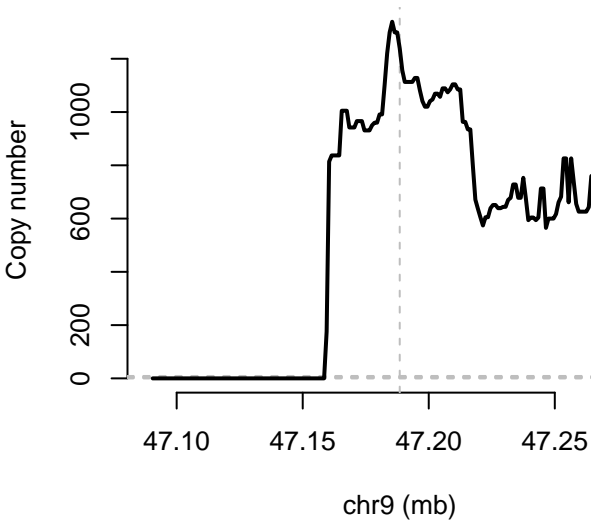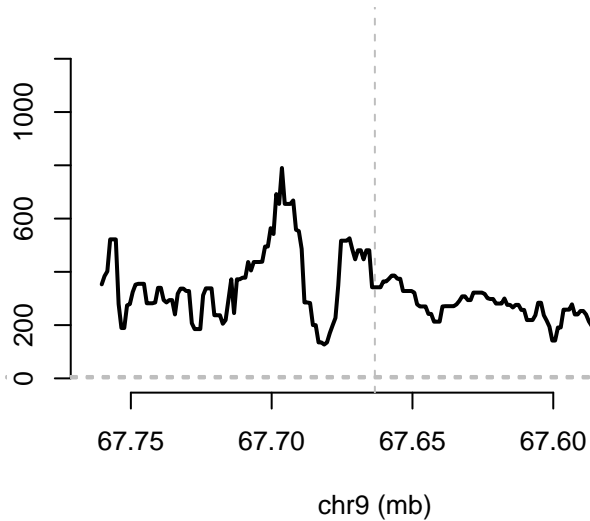

K562 chr9:47,188,491::chr9:67,663,349++

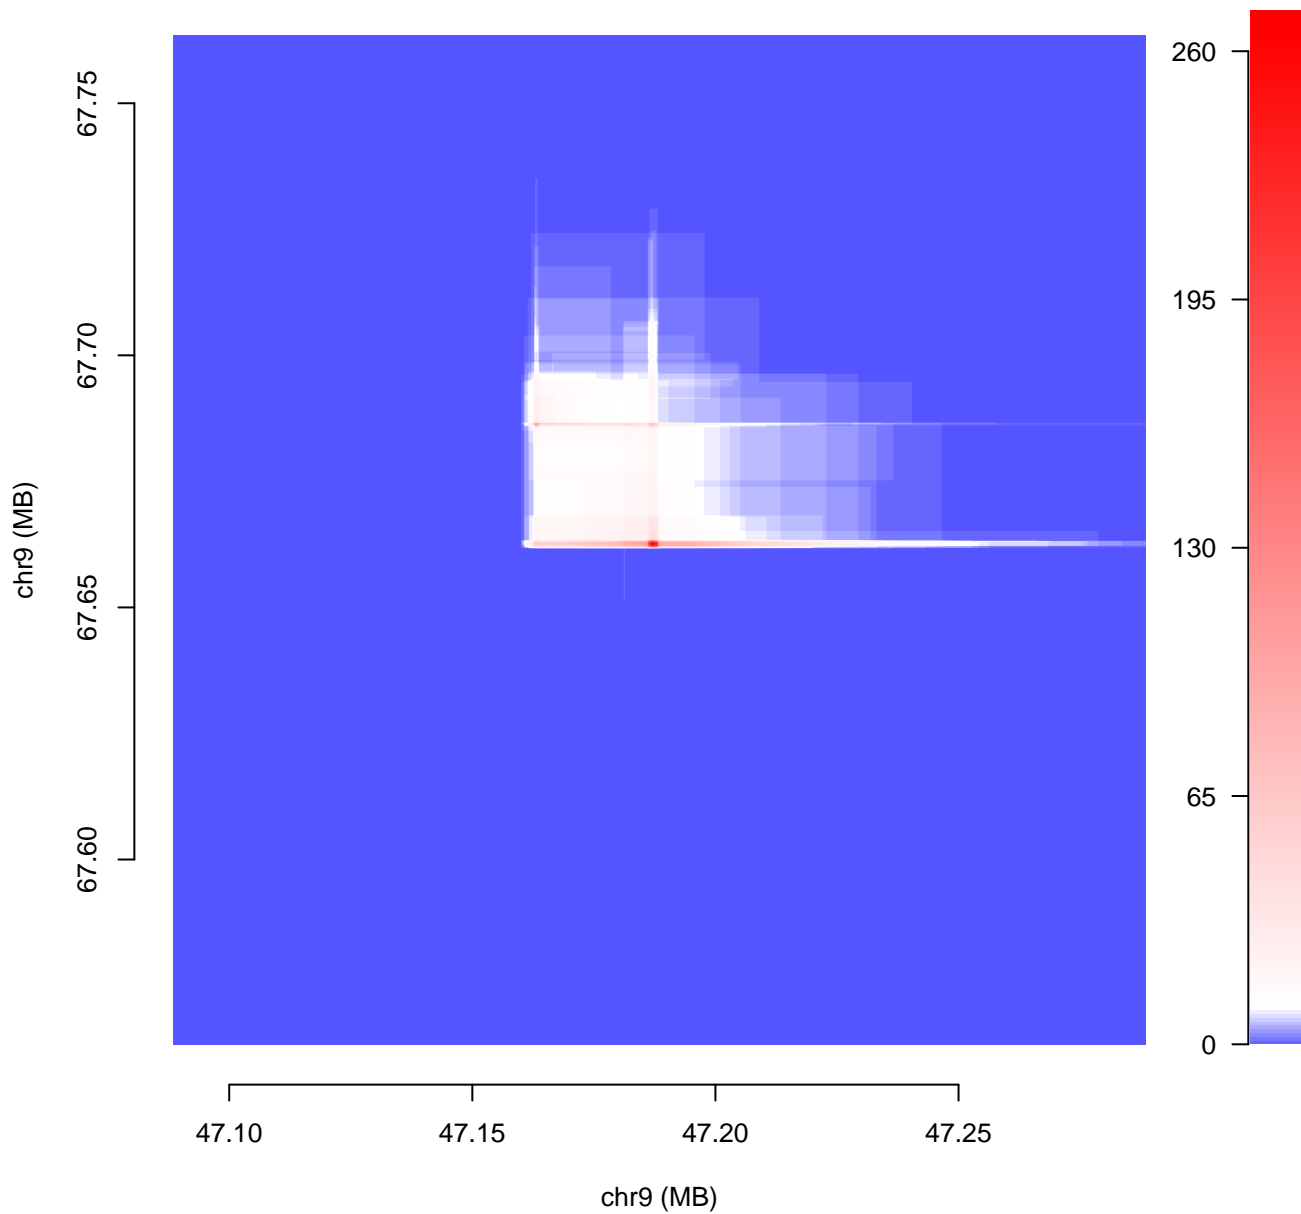

Supplement: Supplemental_Data.zip [file event_10.pdf › event_10.pdf]

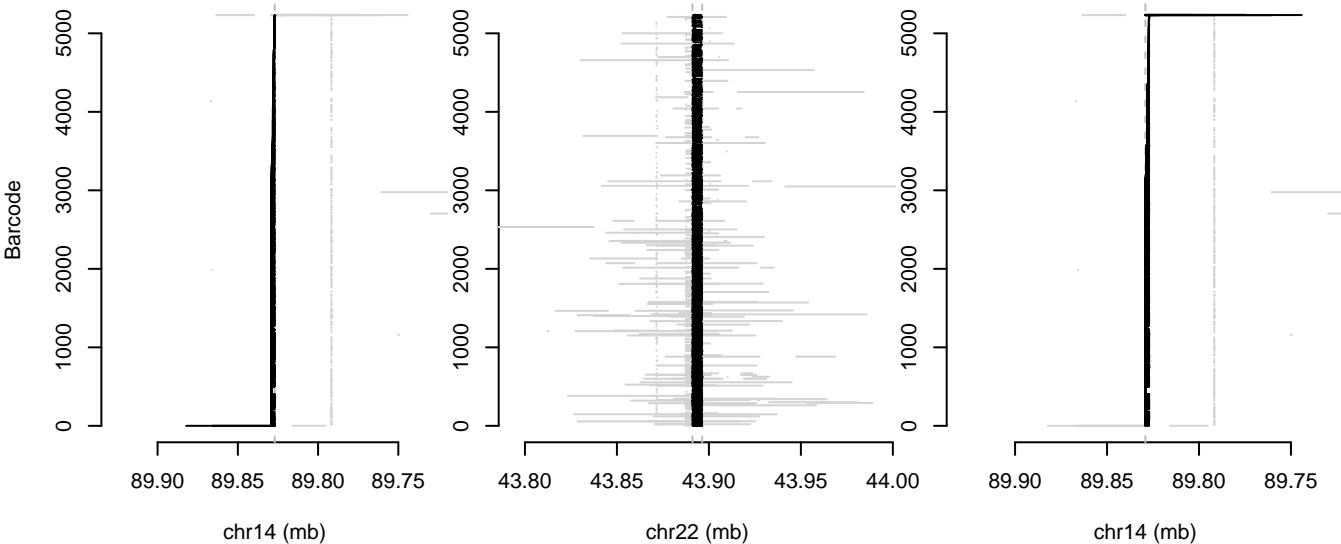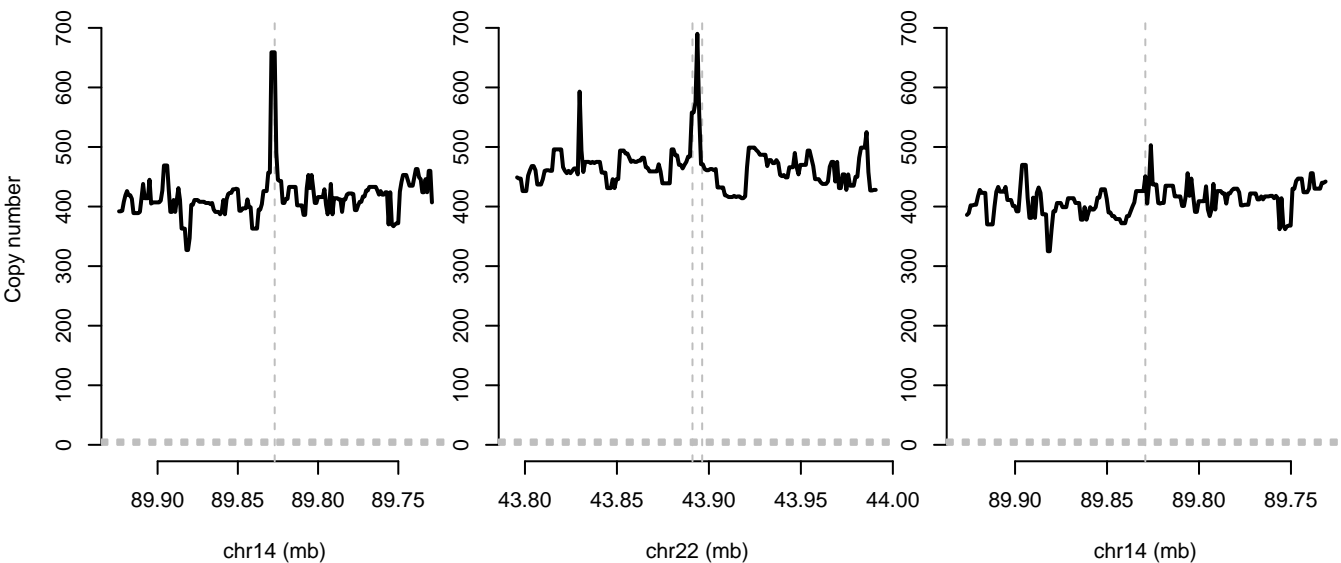

K562 chr14:89,827,041::chr22:43,891,077--

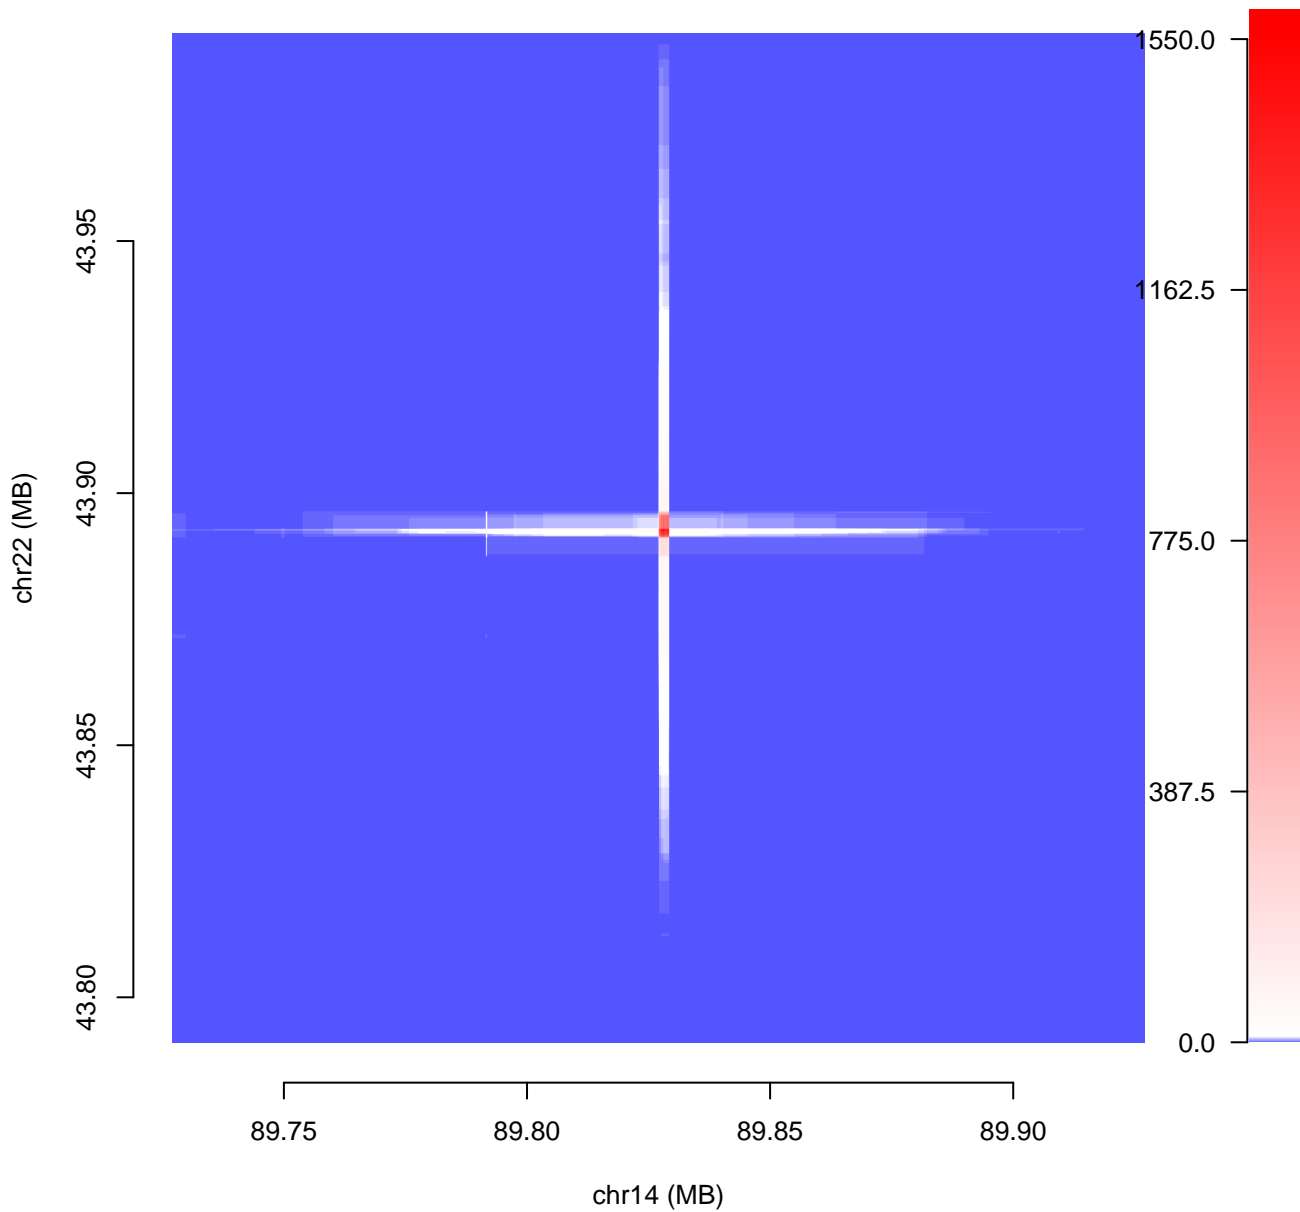

K562 chr22:43,896,355::chr14:89,829,171++

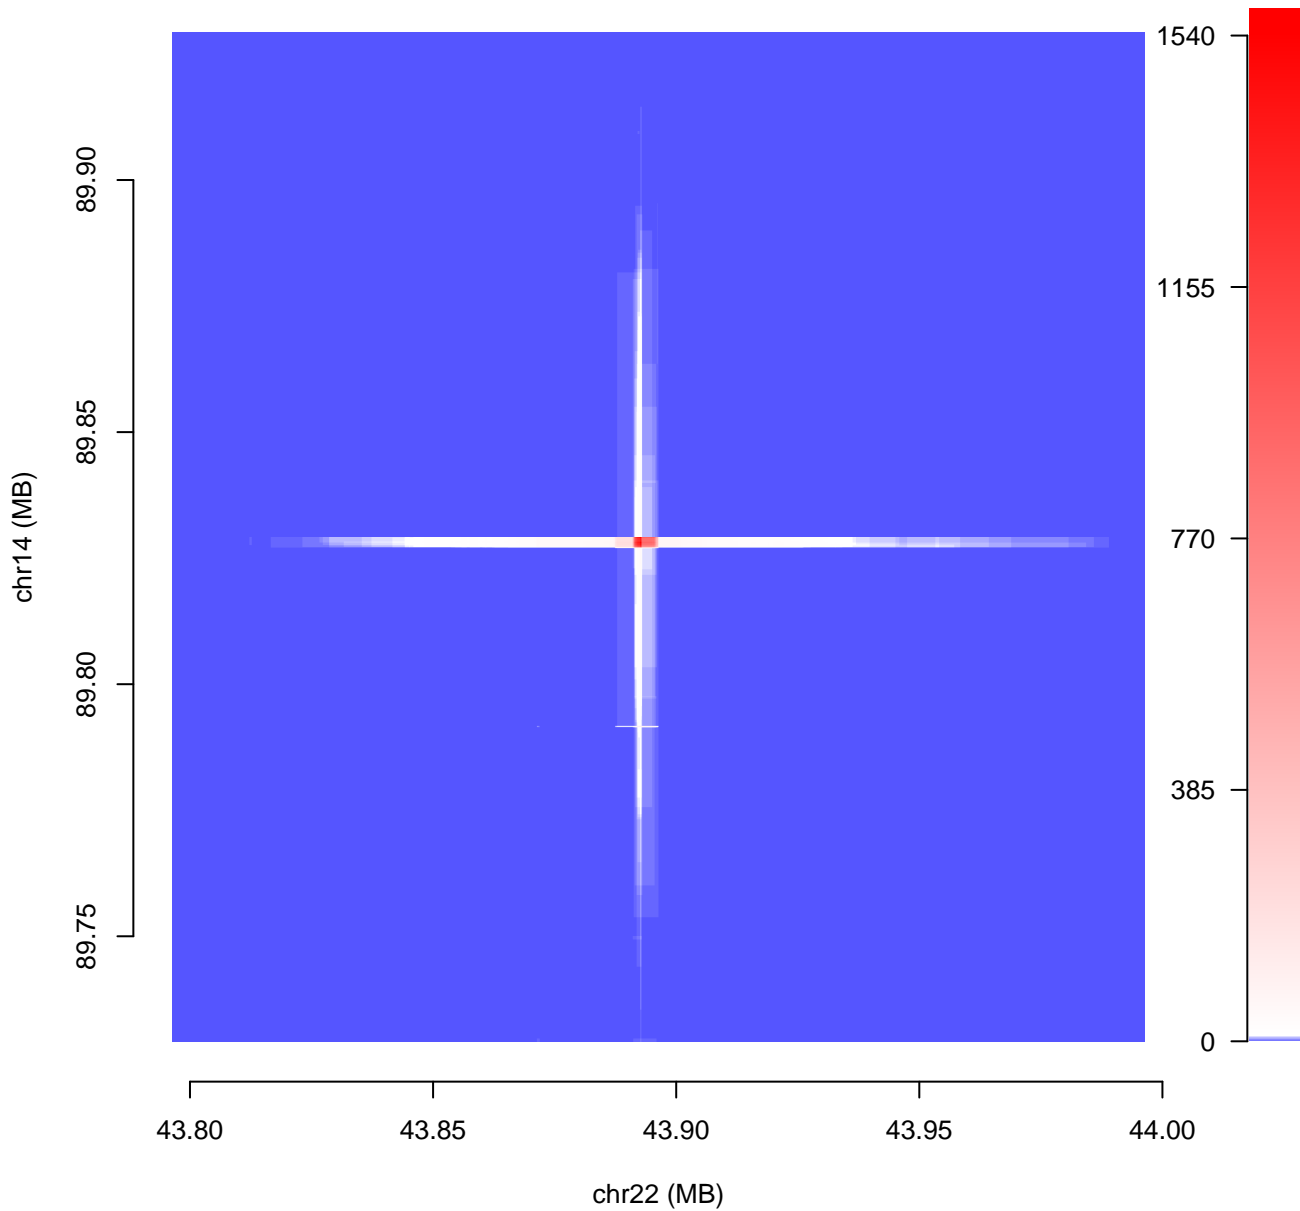

K562 chr22:43,896,355::chr22:43,891,077+-

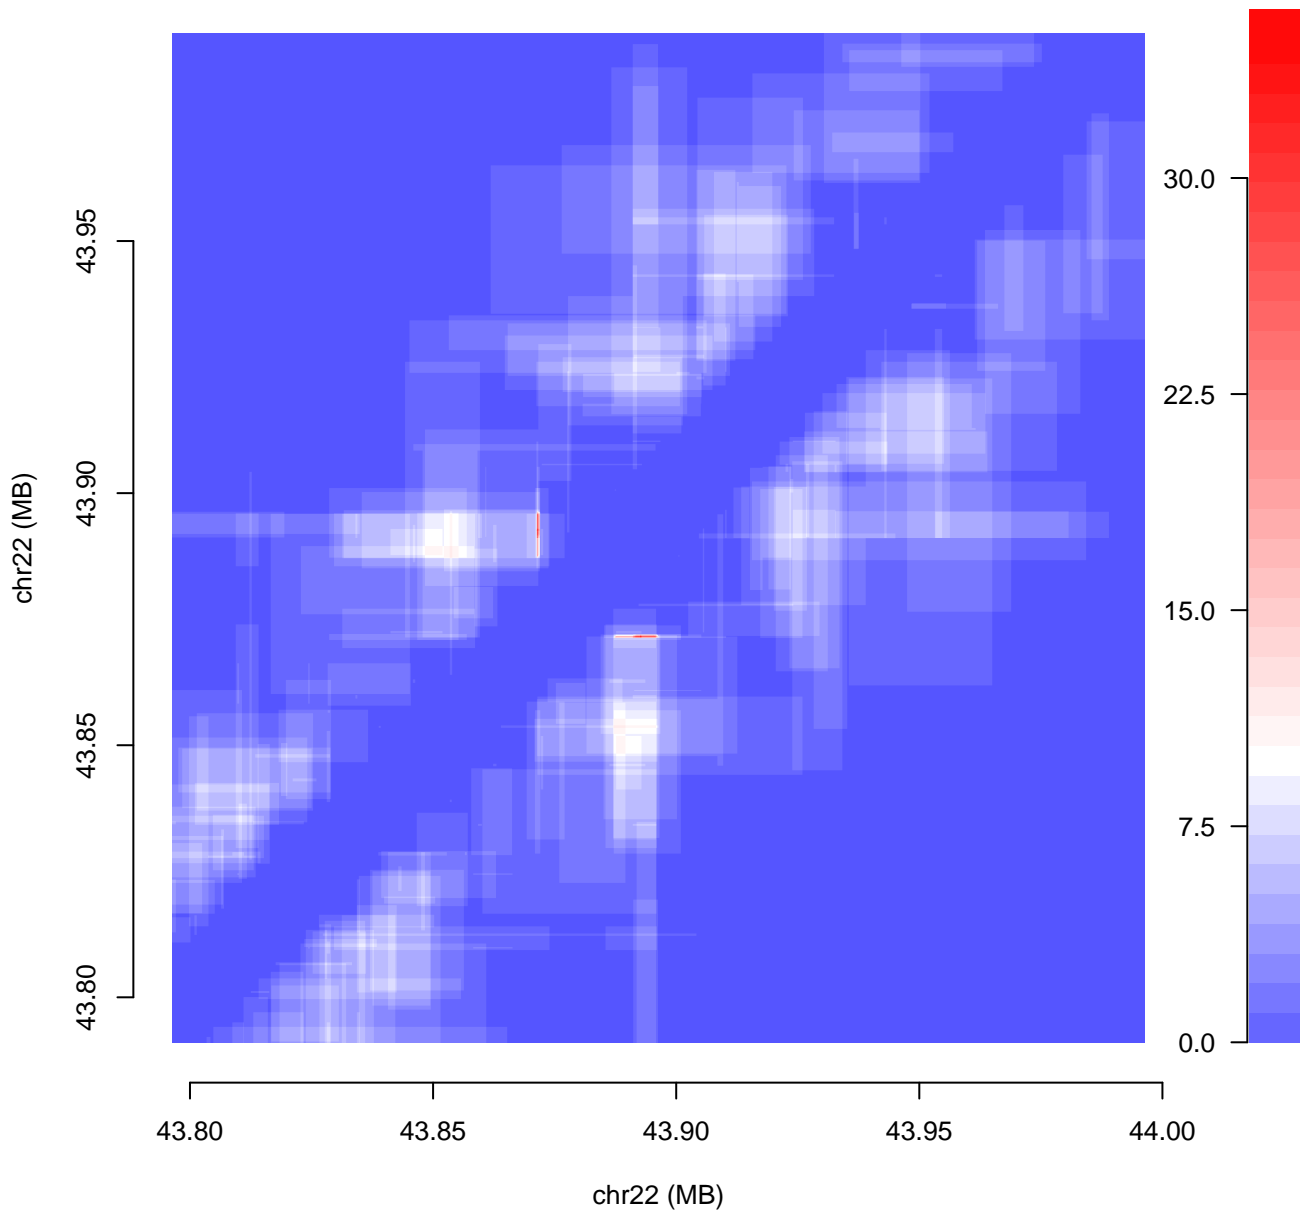

Supplement: Supplemental_Data.zip [file event_100.pdf › event_100.pdf]

Barcode

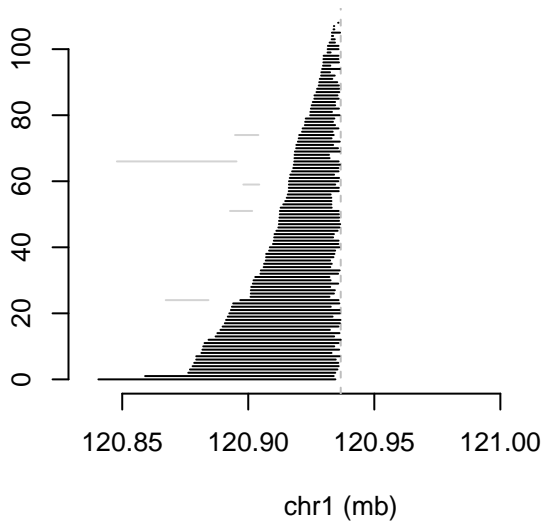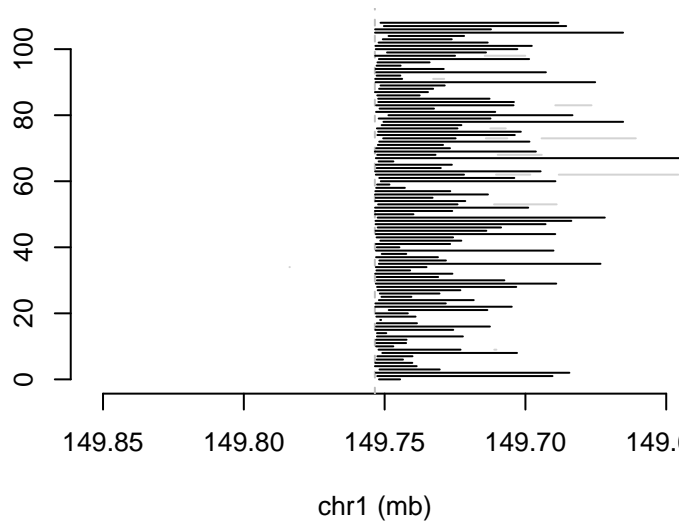

Copy number

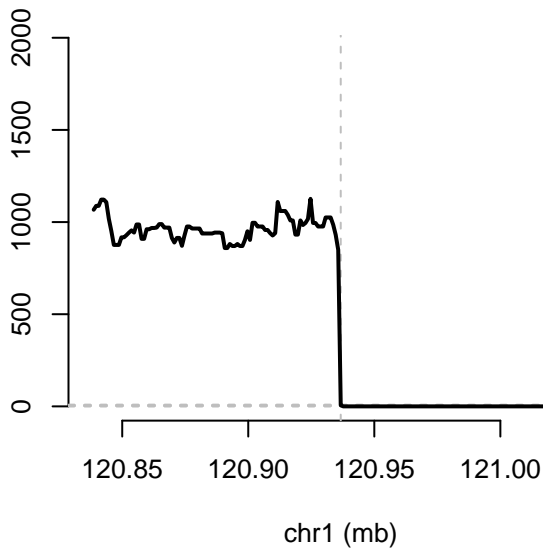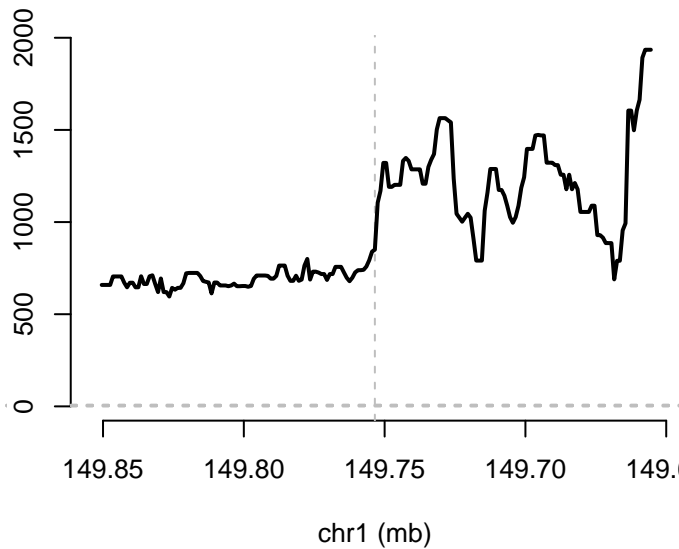

K562 chr1:149,753,468::chr1:120,936,687++

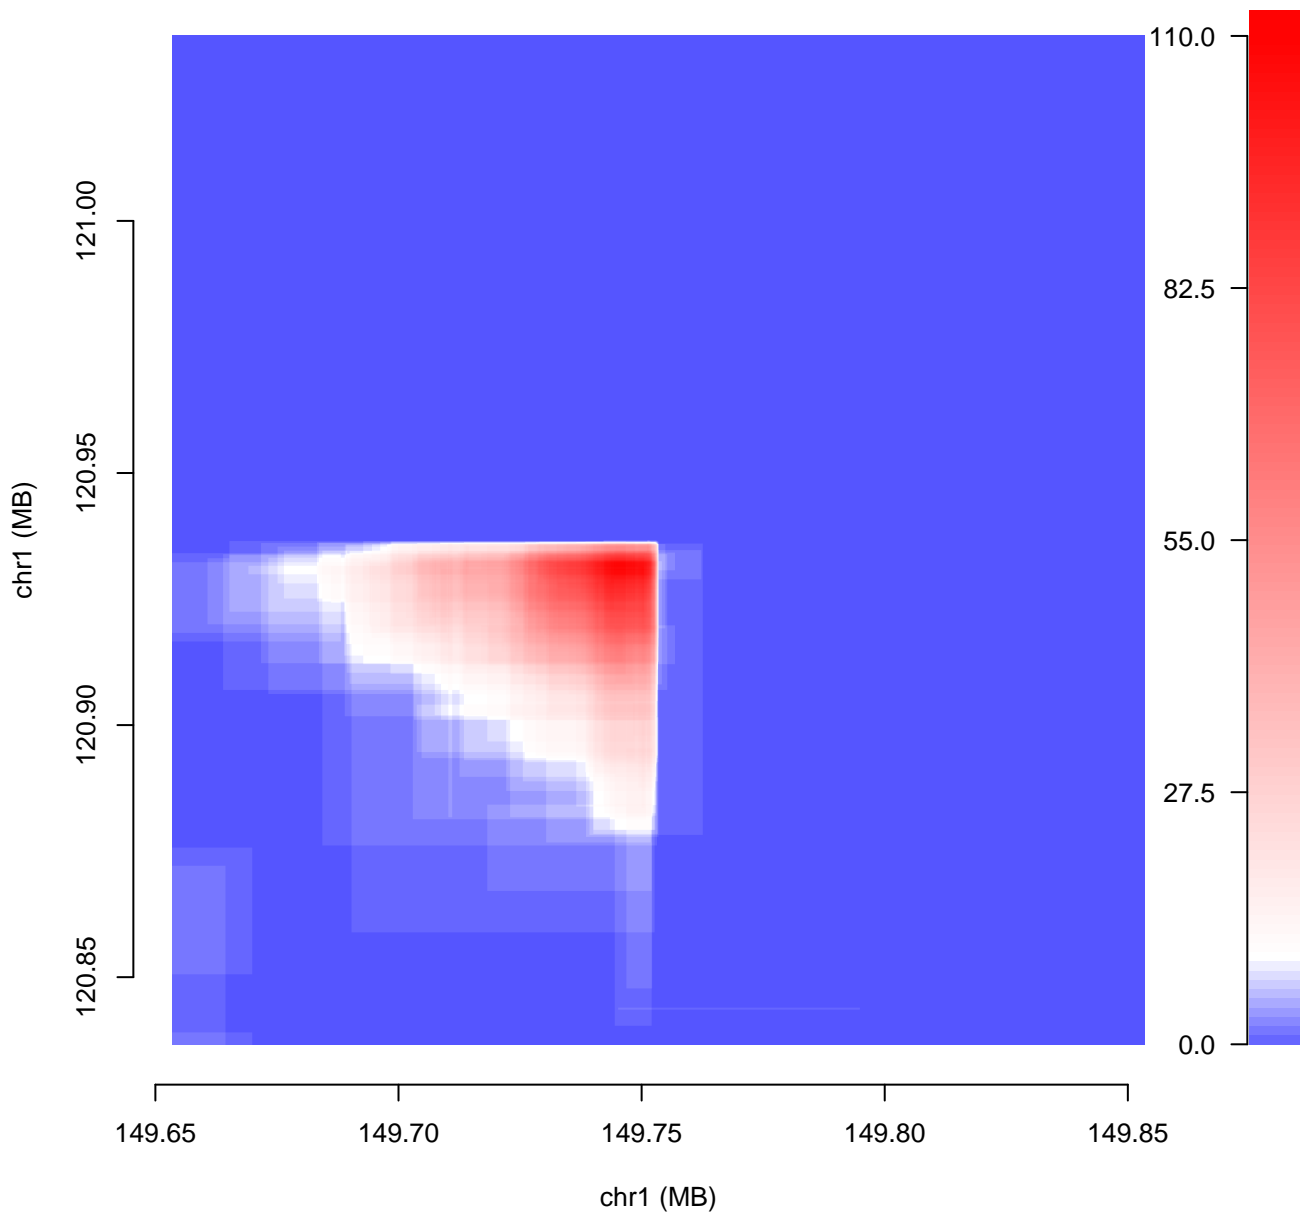

Supplement: Supplemental_Data.zip [file event_101.pdf › event_101.pdf]

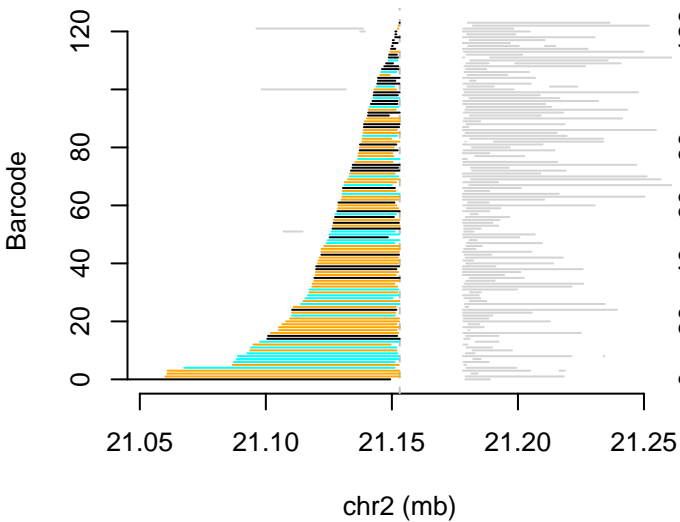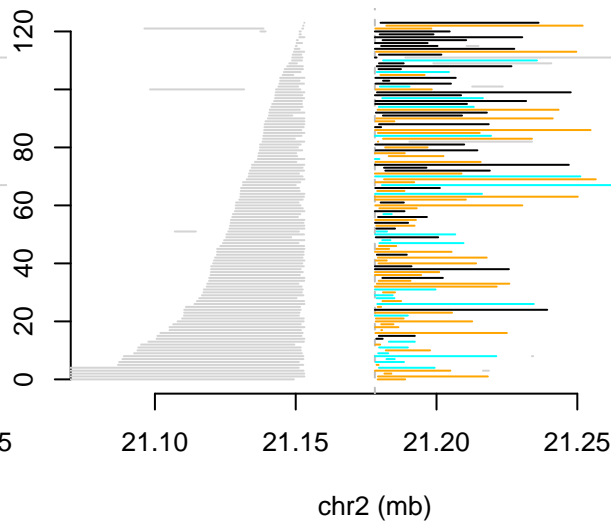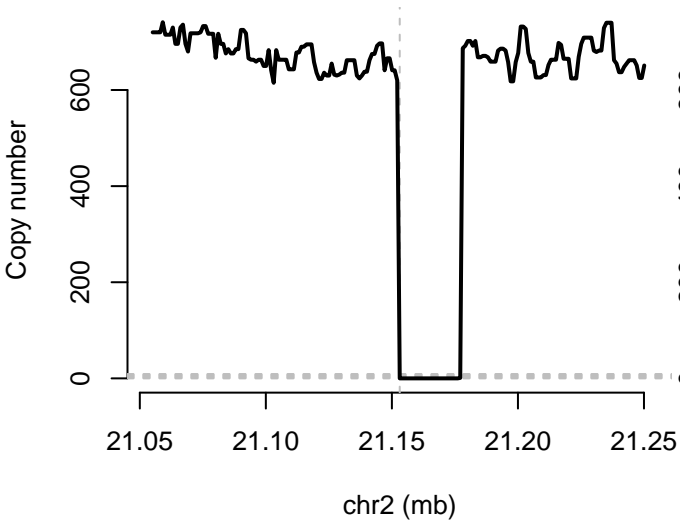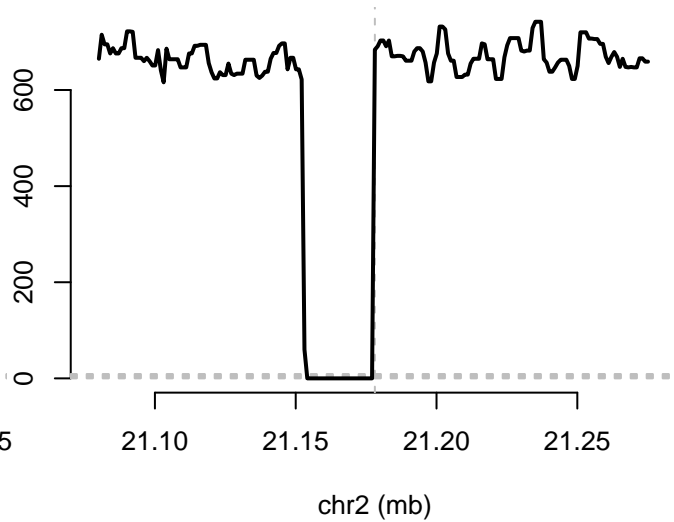

K562 chr2:21,153,113::chr2:21,178,111+-

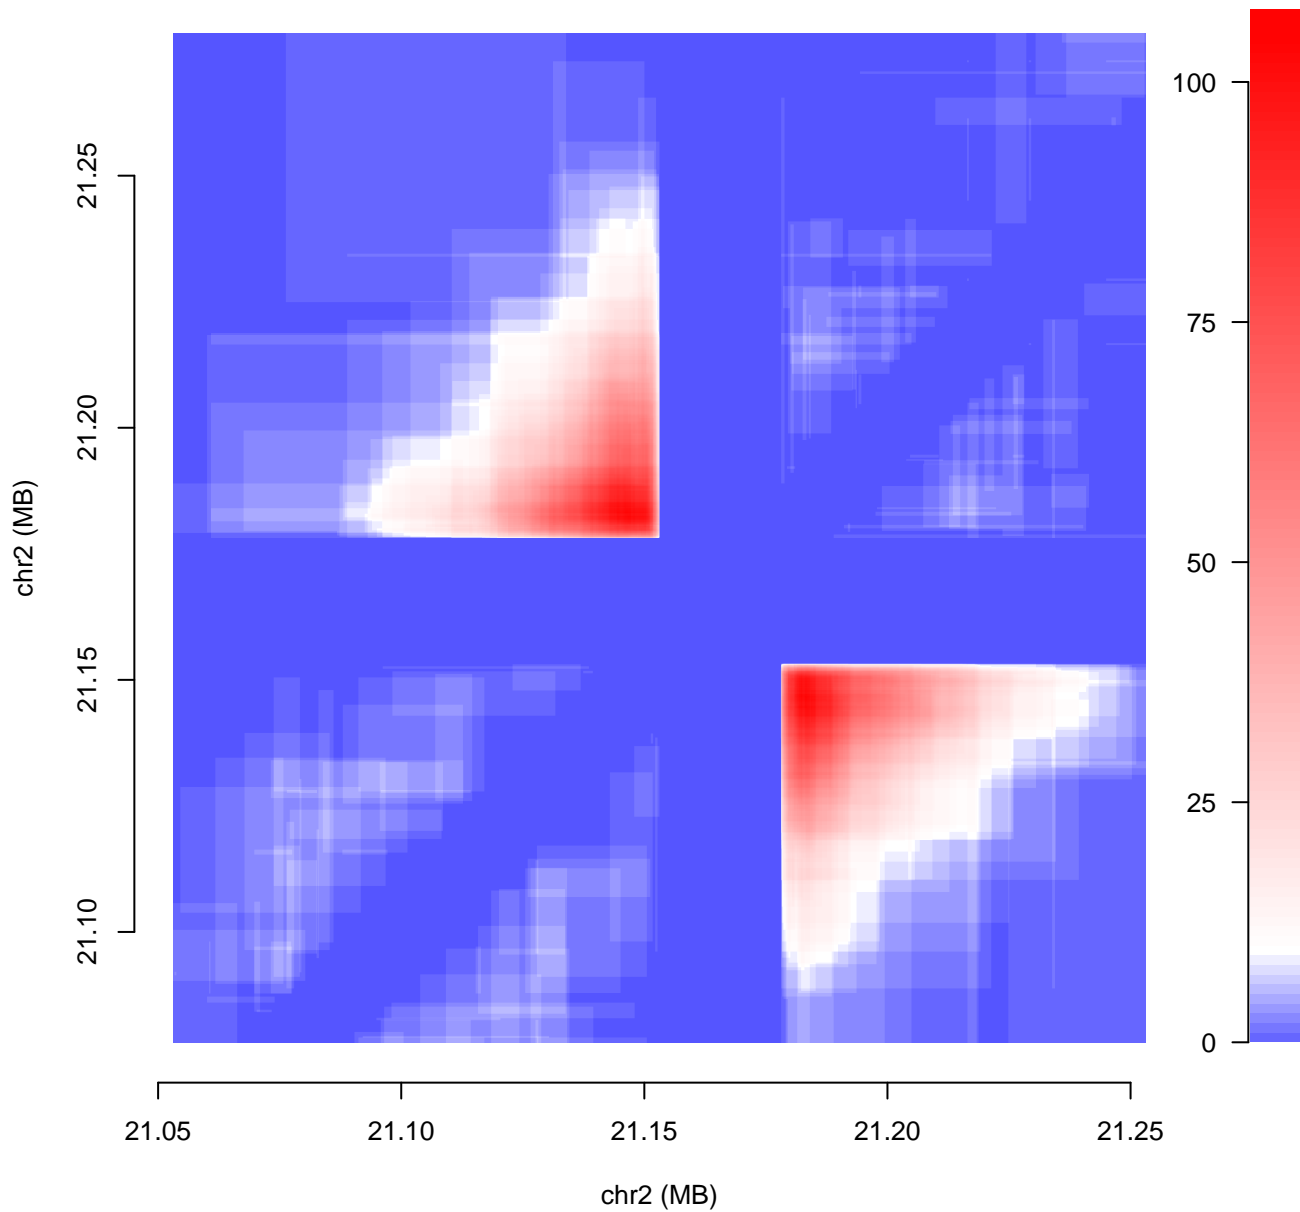

Supplement: Supplemental_Data.zip [file event_102.pdf › event_102.pdf]

Barcode

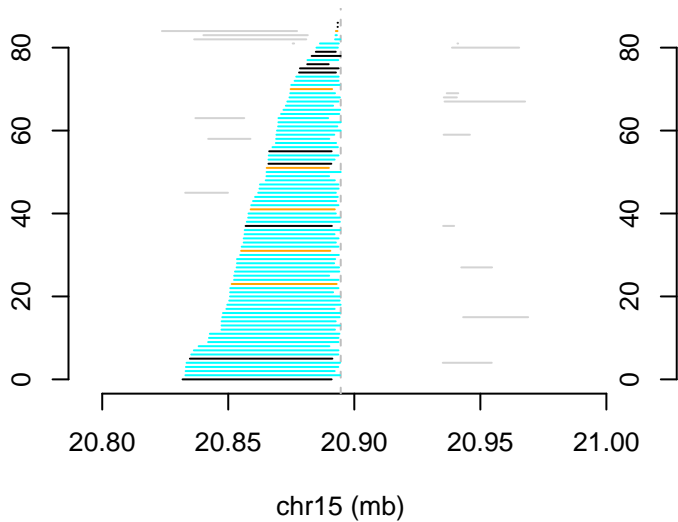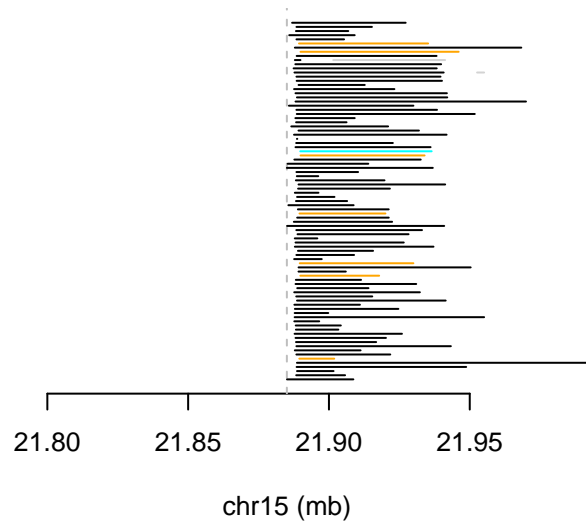

Copy number

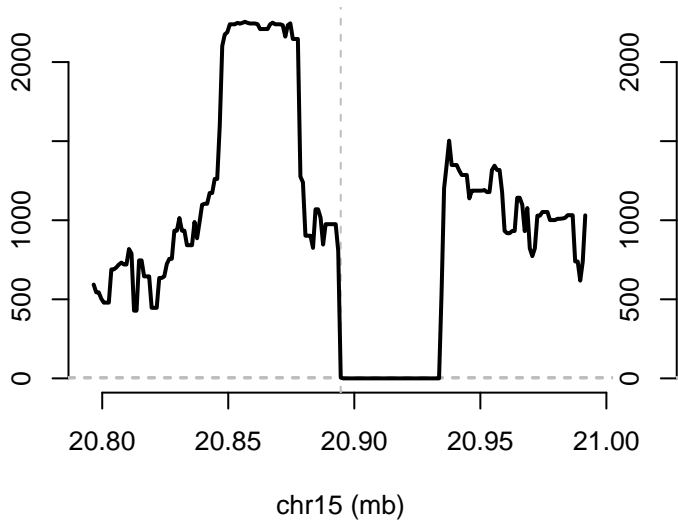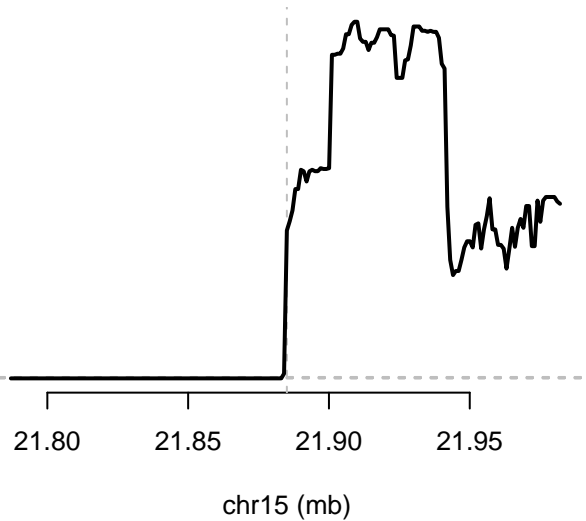

K562 chr15:20,894,619::chr15:21,885,060+-

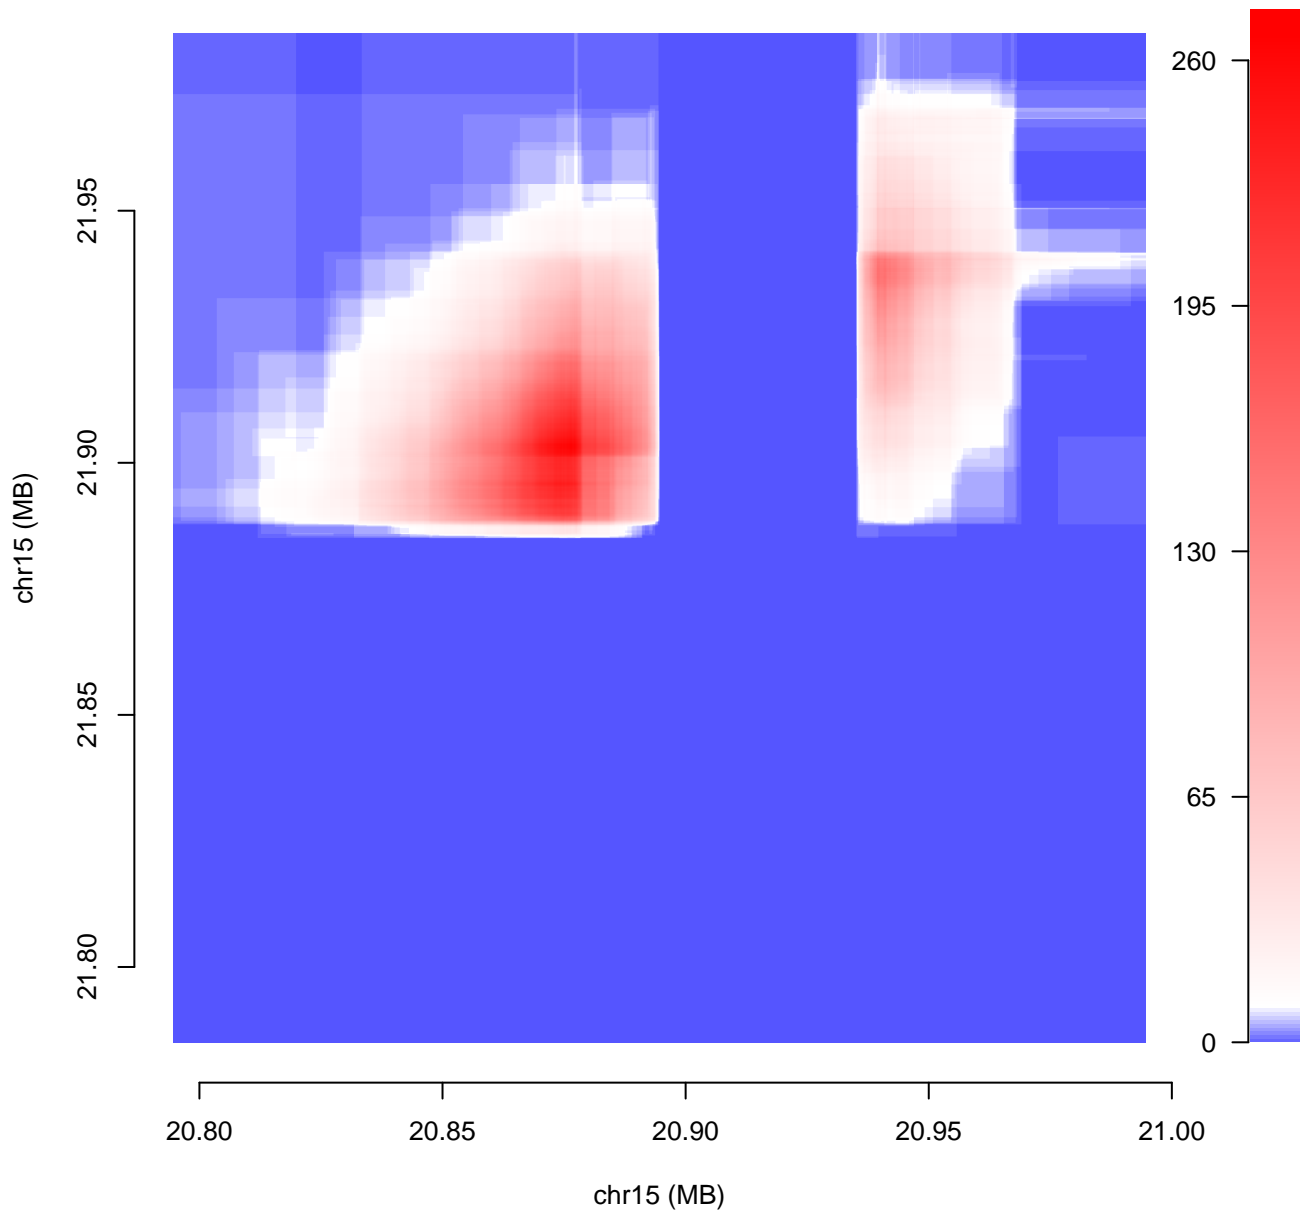

Supplement: Supplemental_Data.zip [file event_103.pdf › event_103.pdf]

Barcode

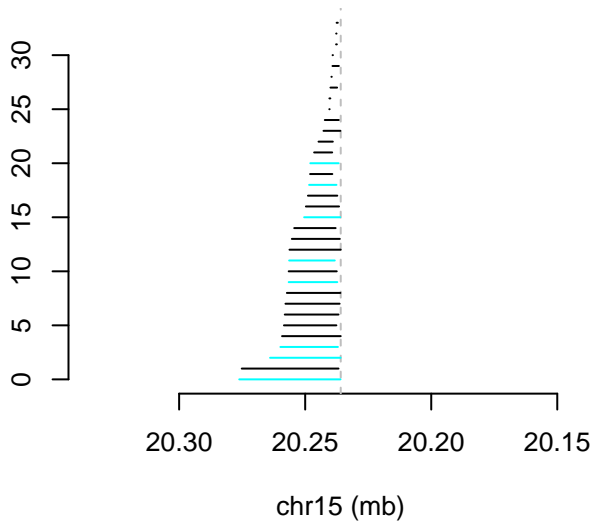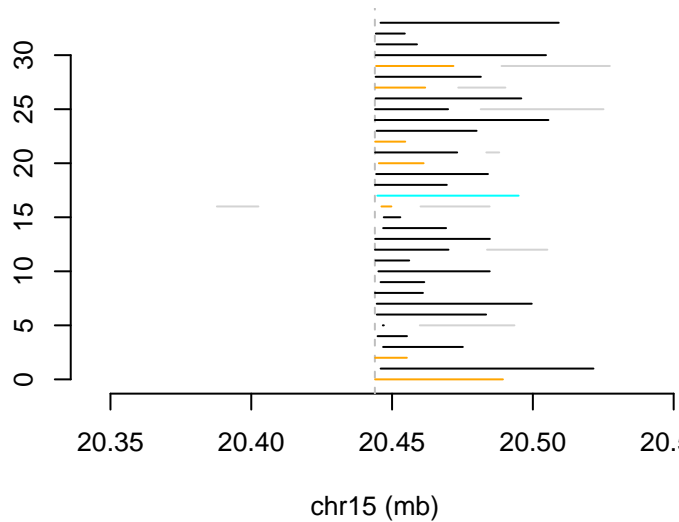

Copy number

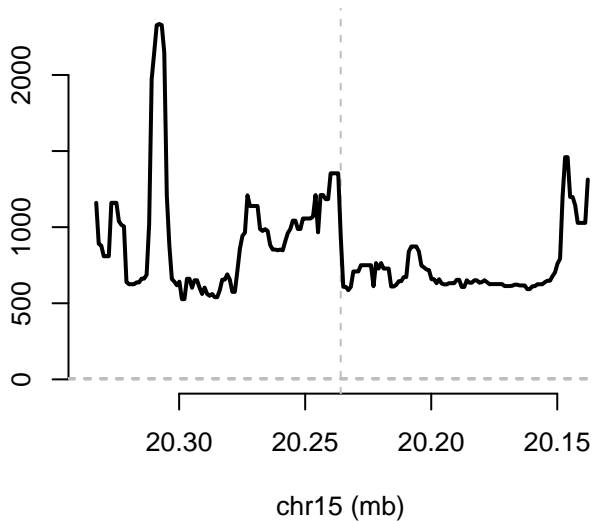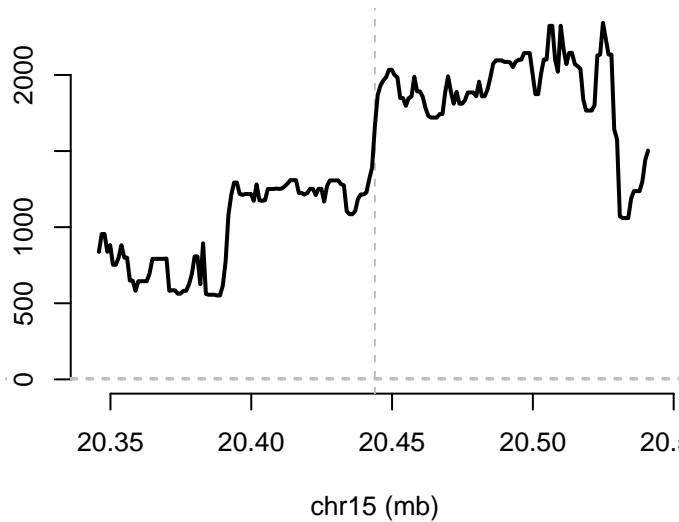

K562 chr15:20,443,892::chr15:20,235,895--

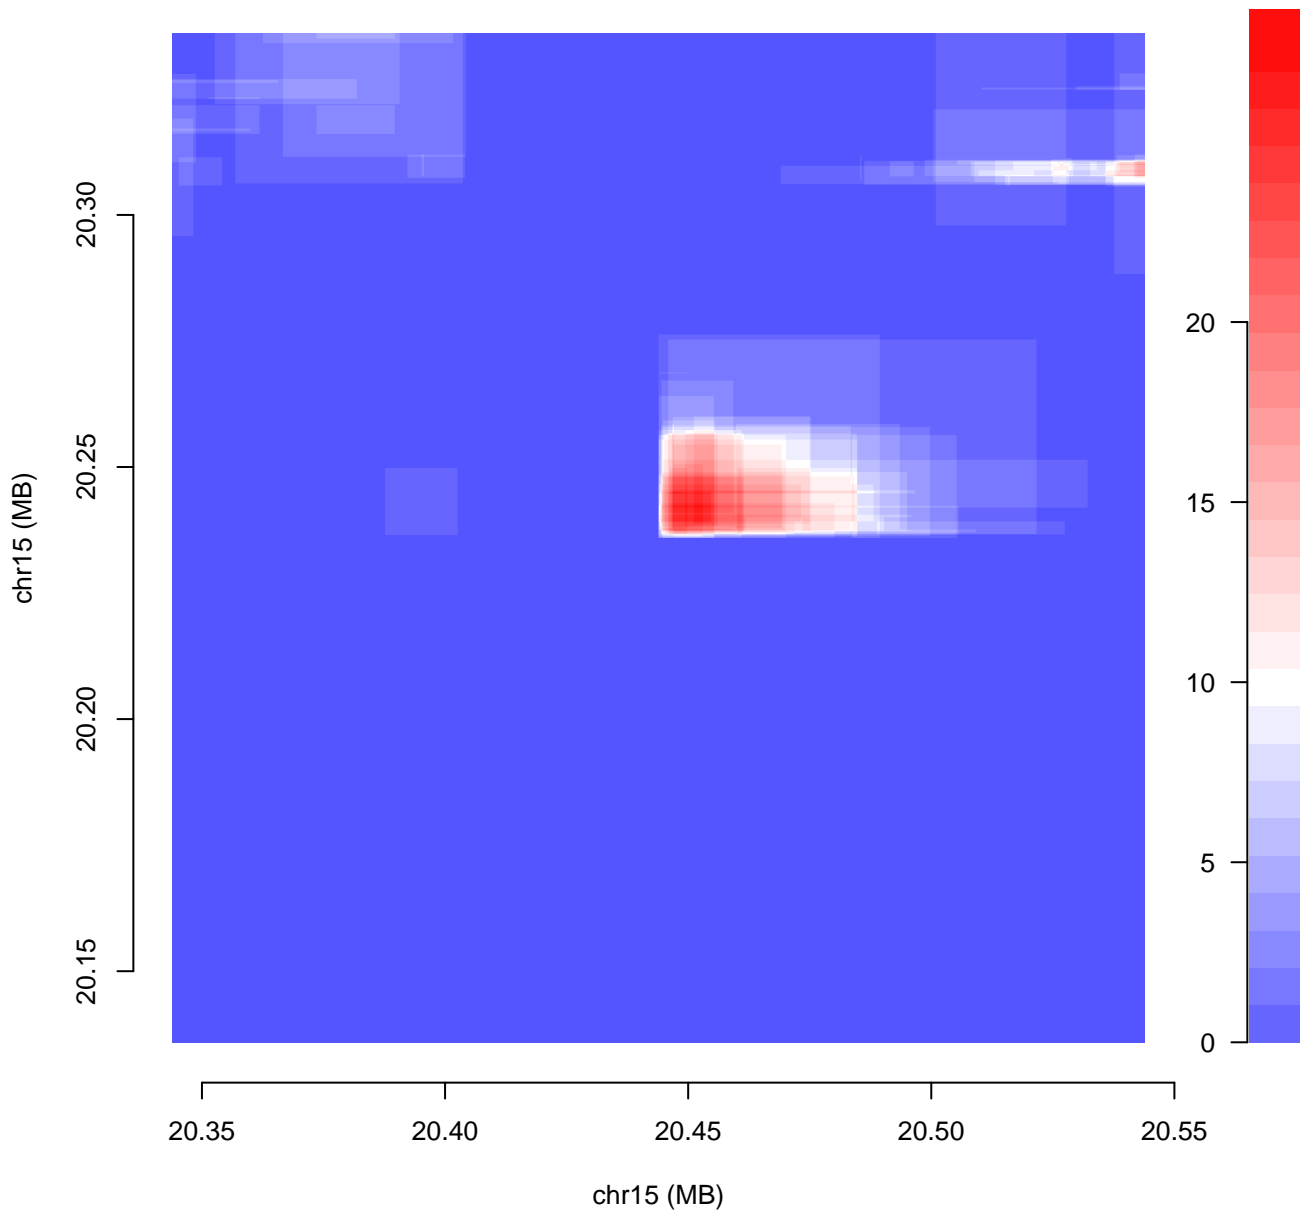

Supplement: Supplemental_Data.zip [file event_104.pdf › event_104.pdf]

Barcode

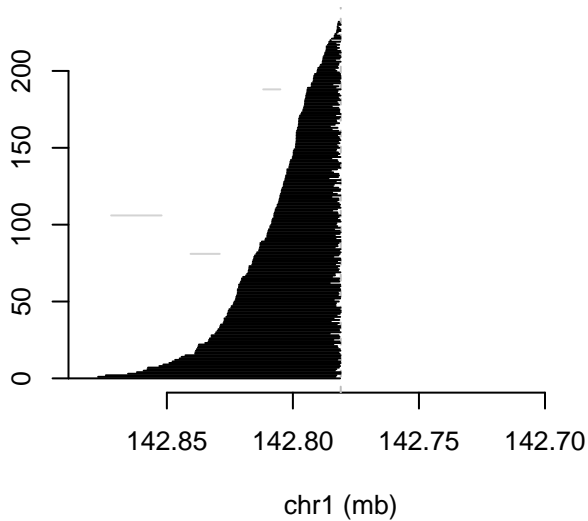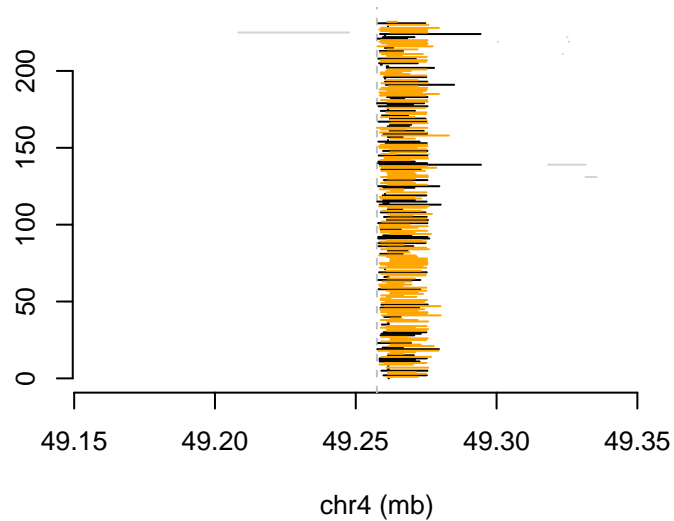

Copy number

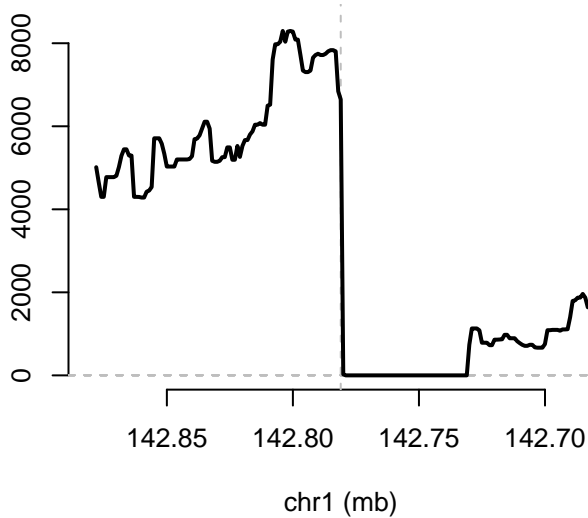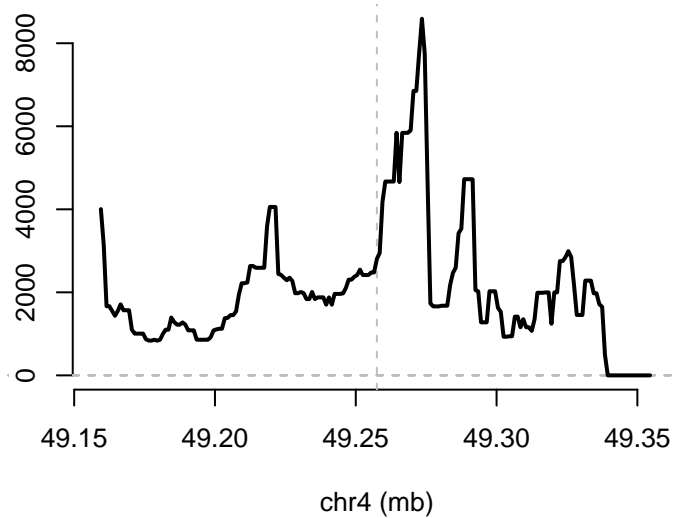

K562 chr1:142,781,023::chr4:49,257,491--

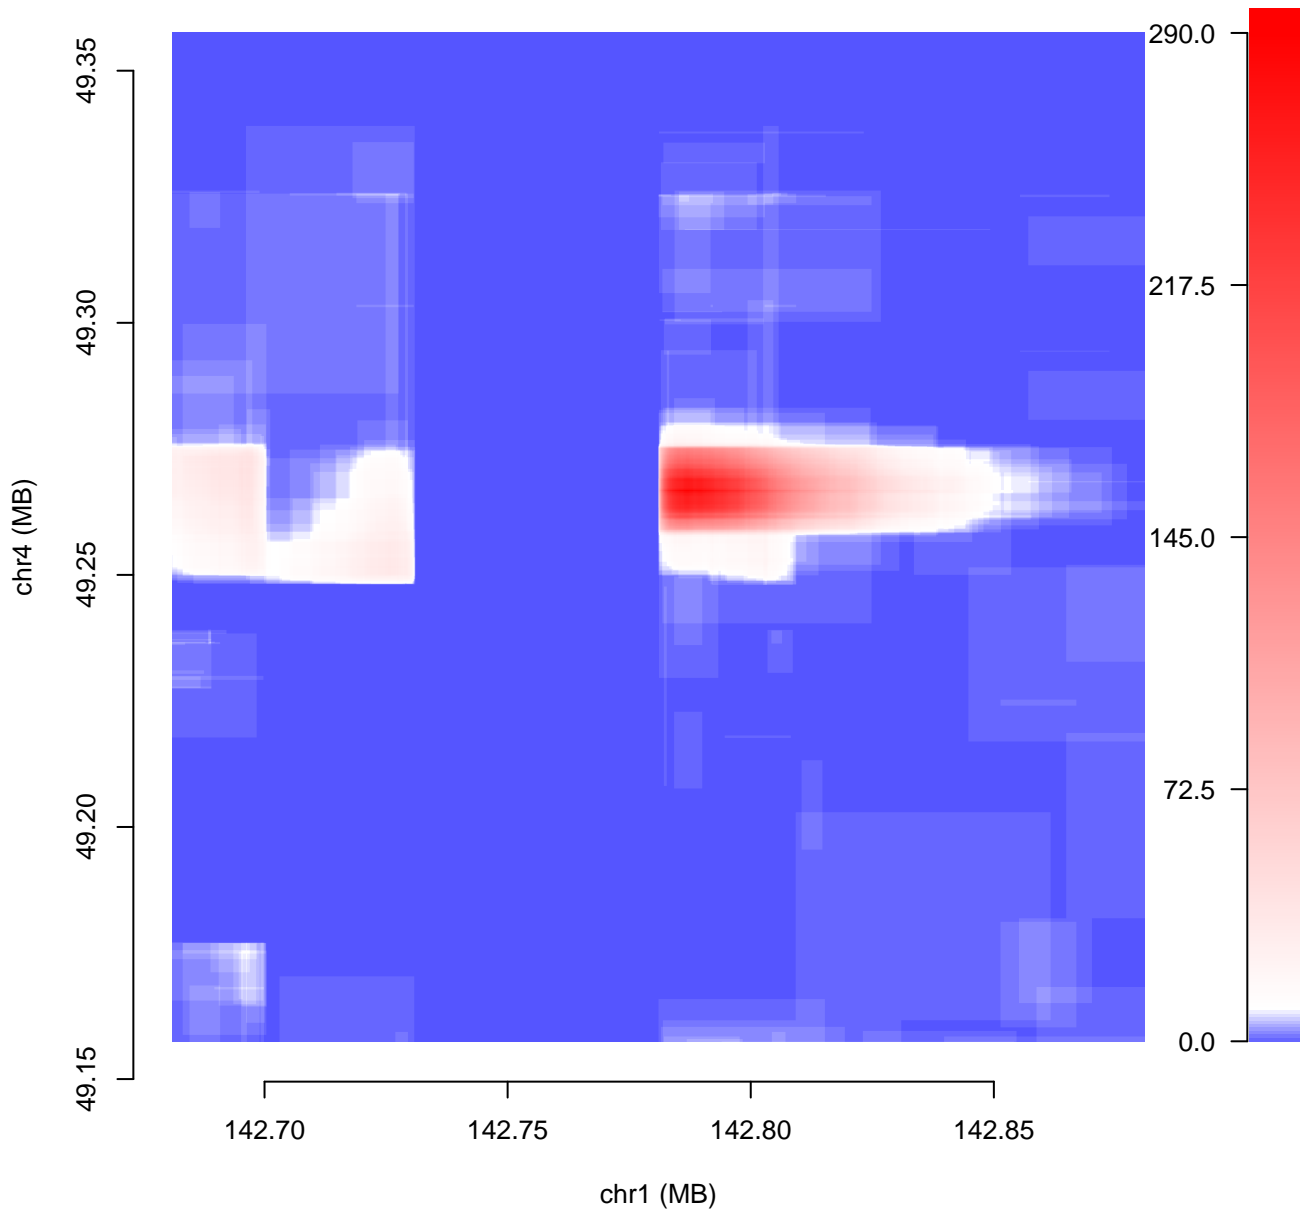

Supplement: Supplemental_Data.zip [file event_105.pdf › event_105.pdf]

Barcode

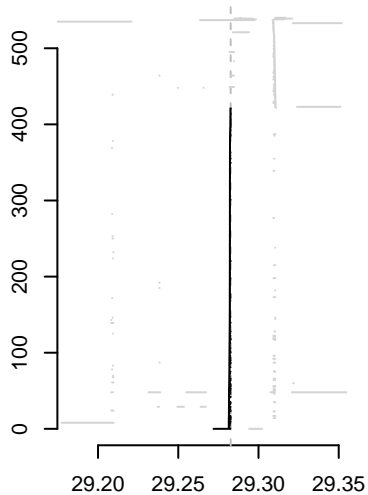

chr16 (mb)

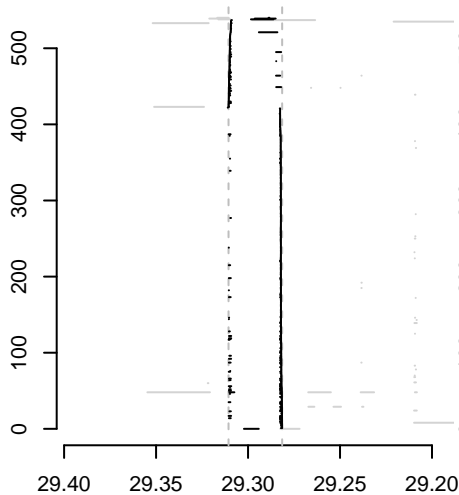

chr16 (mb)

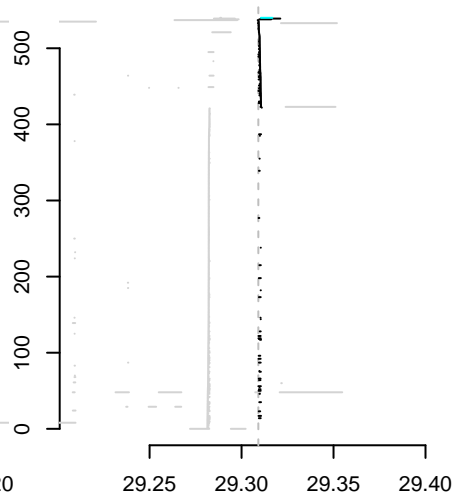

chr16 (mb)

Copy number

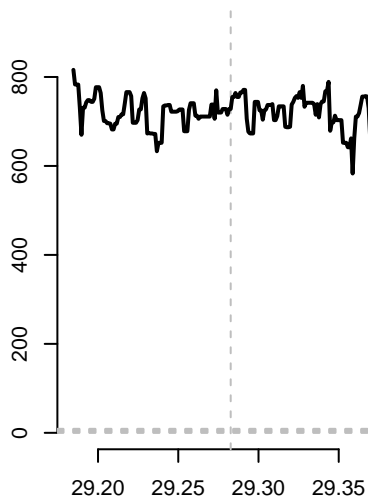

chr16 (mb)

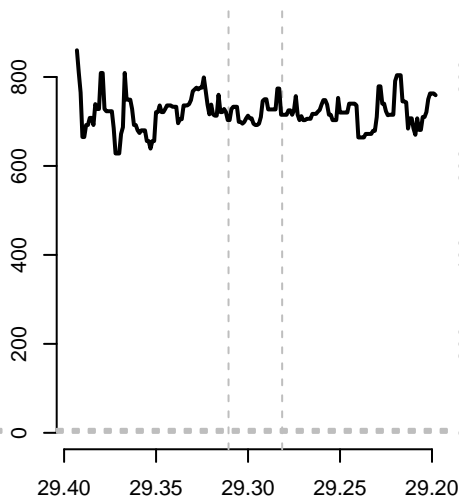

chr16 (mb)

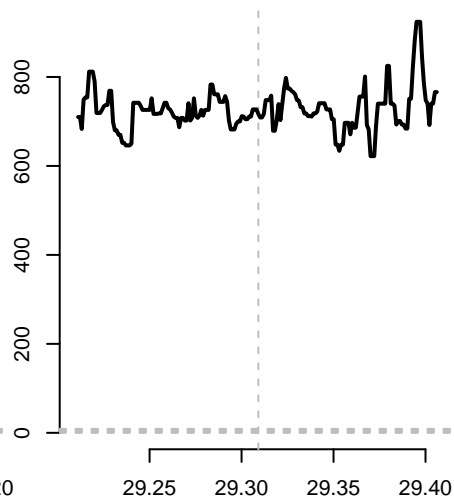

chr16 (mb)

K562 chr16:29,310,614::chr16:29,282,673++

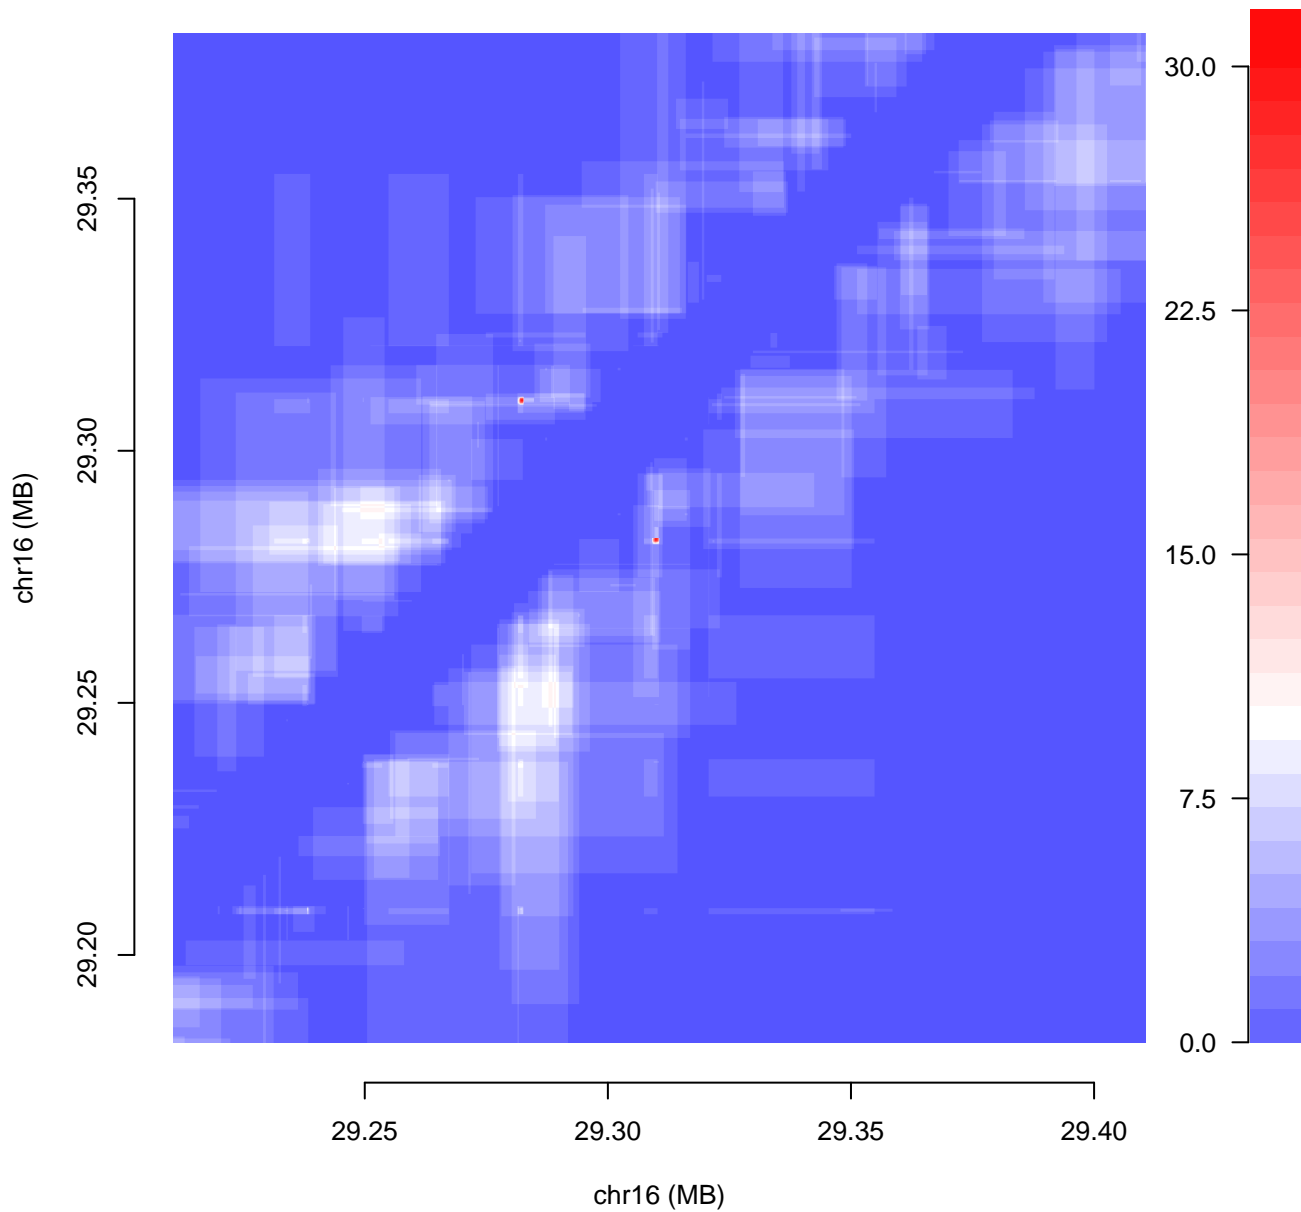

K562 chr16:29,310,614::chr16:29,281,455+-

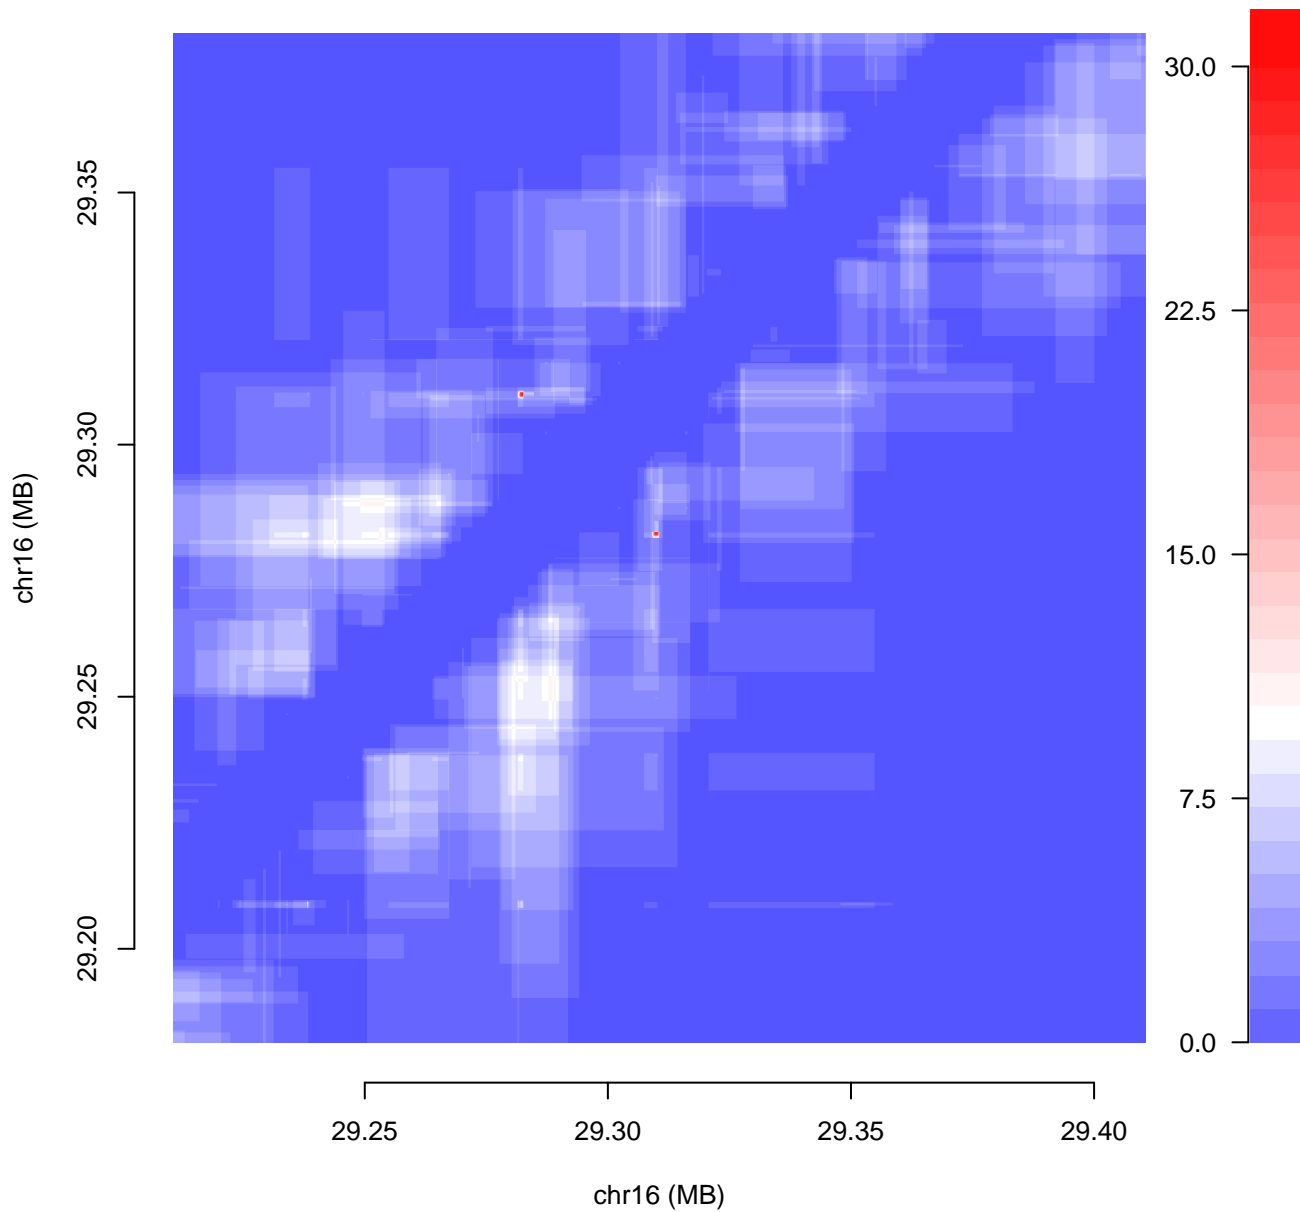

K562 chr16:29,309,122::chr16:29,281,455--

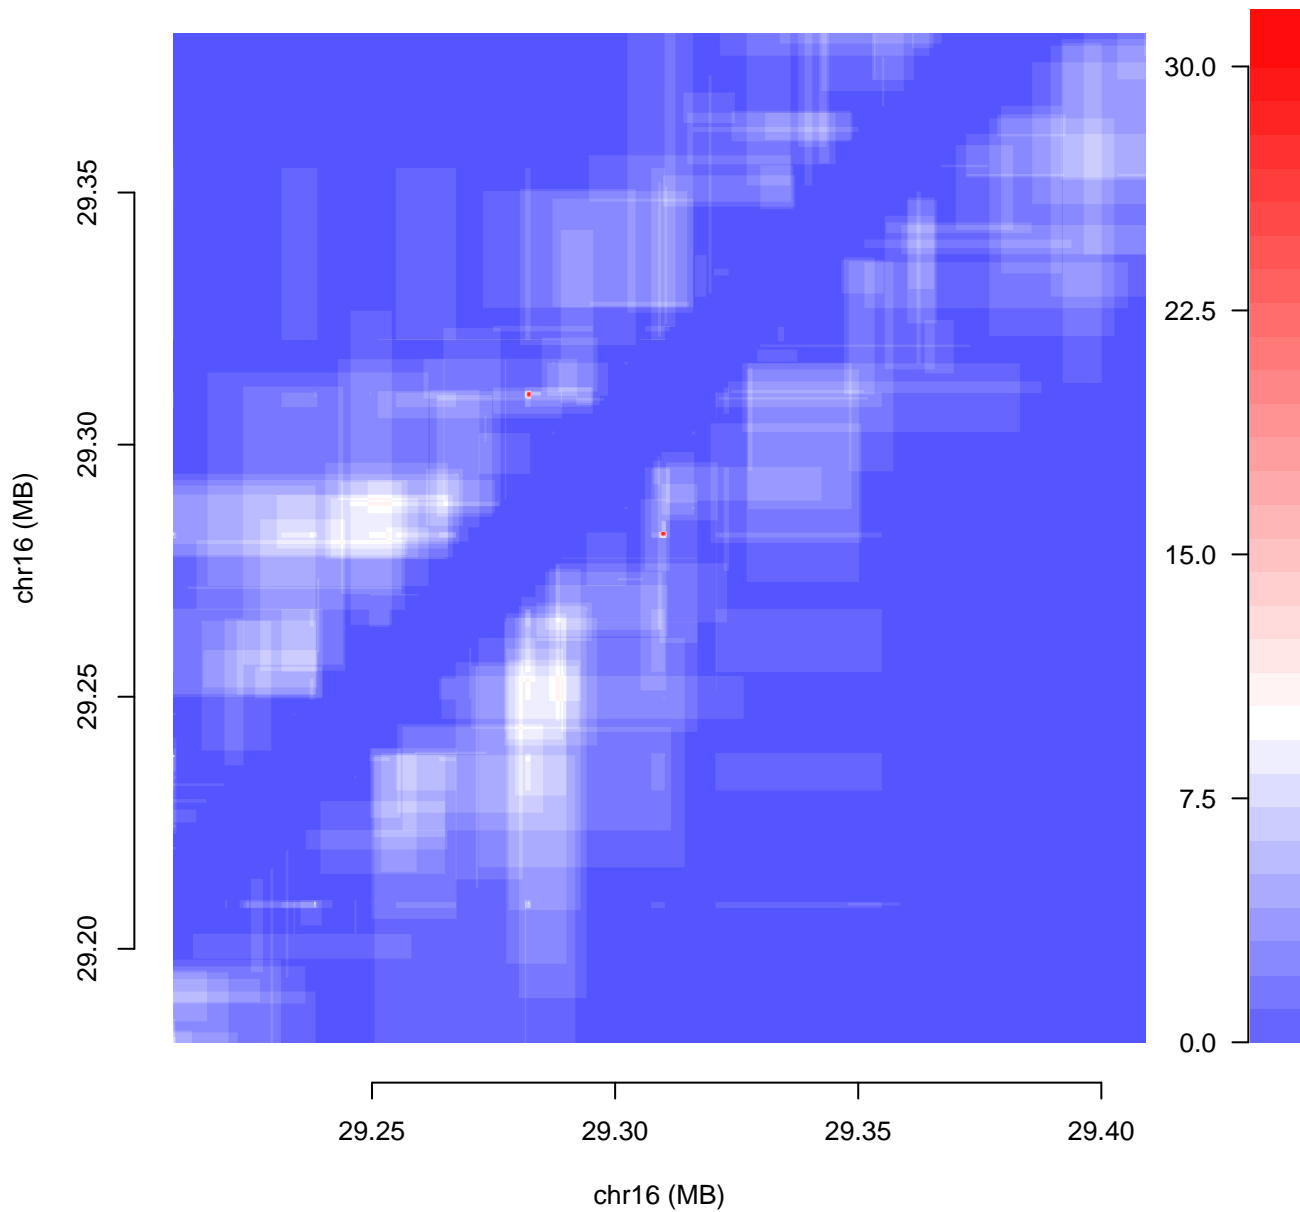

Supplement: Supplemental_Data.zip [file event_106.pdf › event_106.pdf]

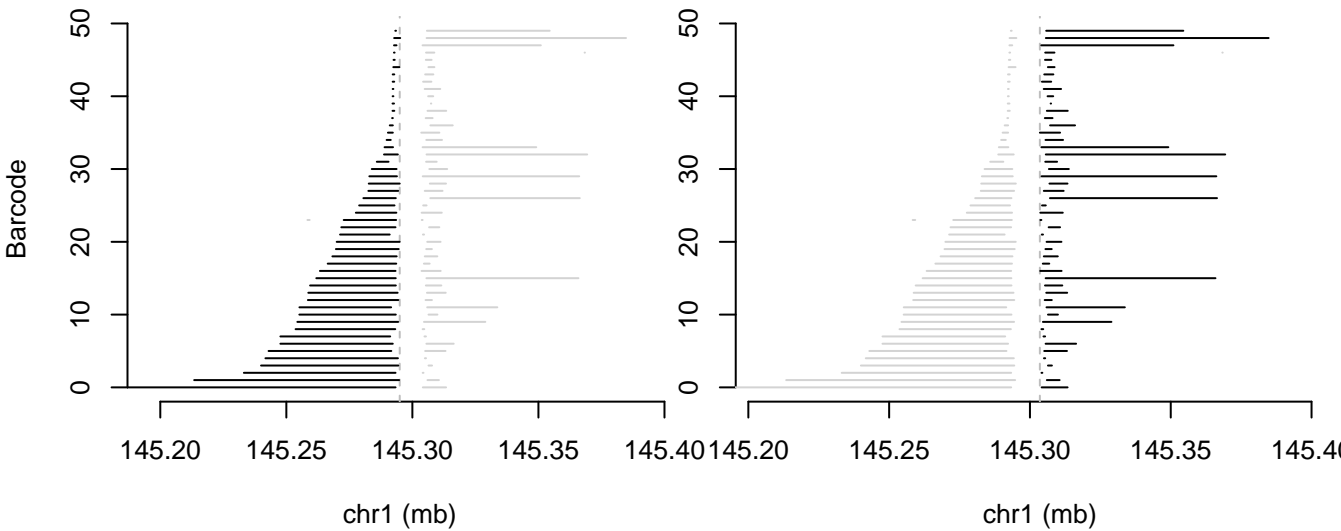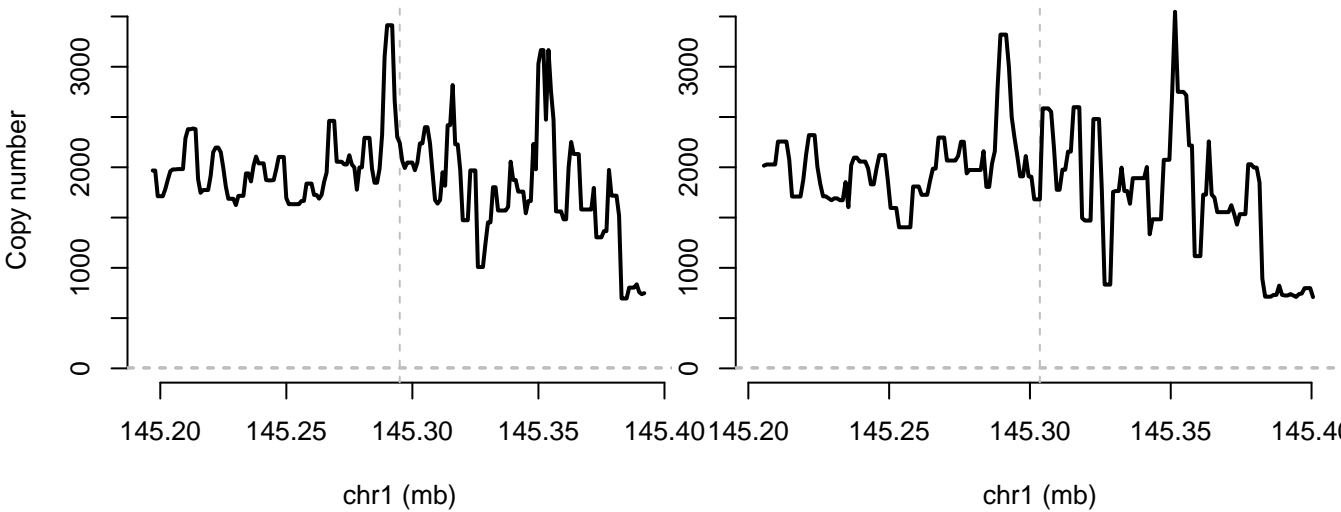

K562 chr1:145,294,988::chr1:145,303,522+-

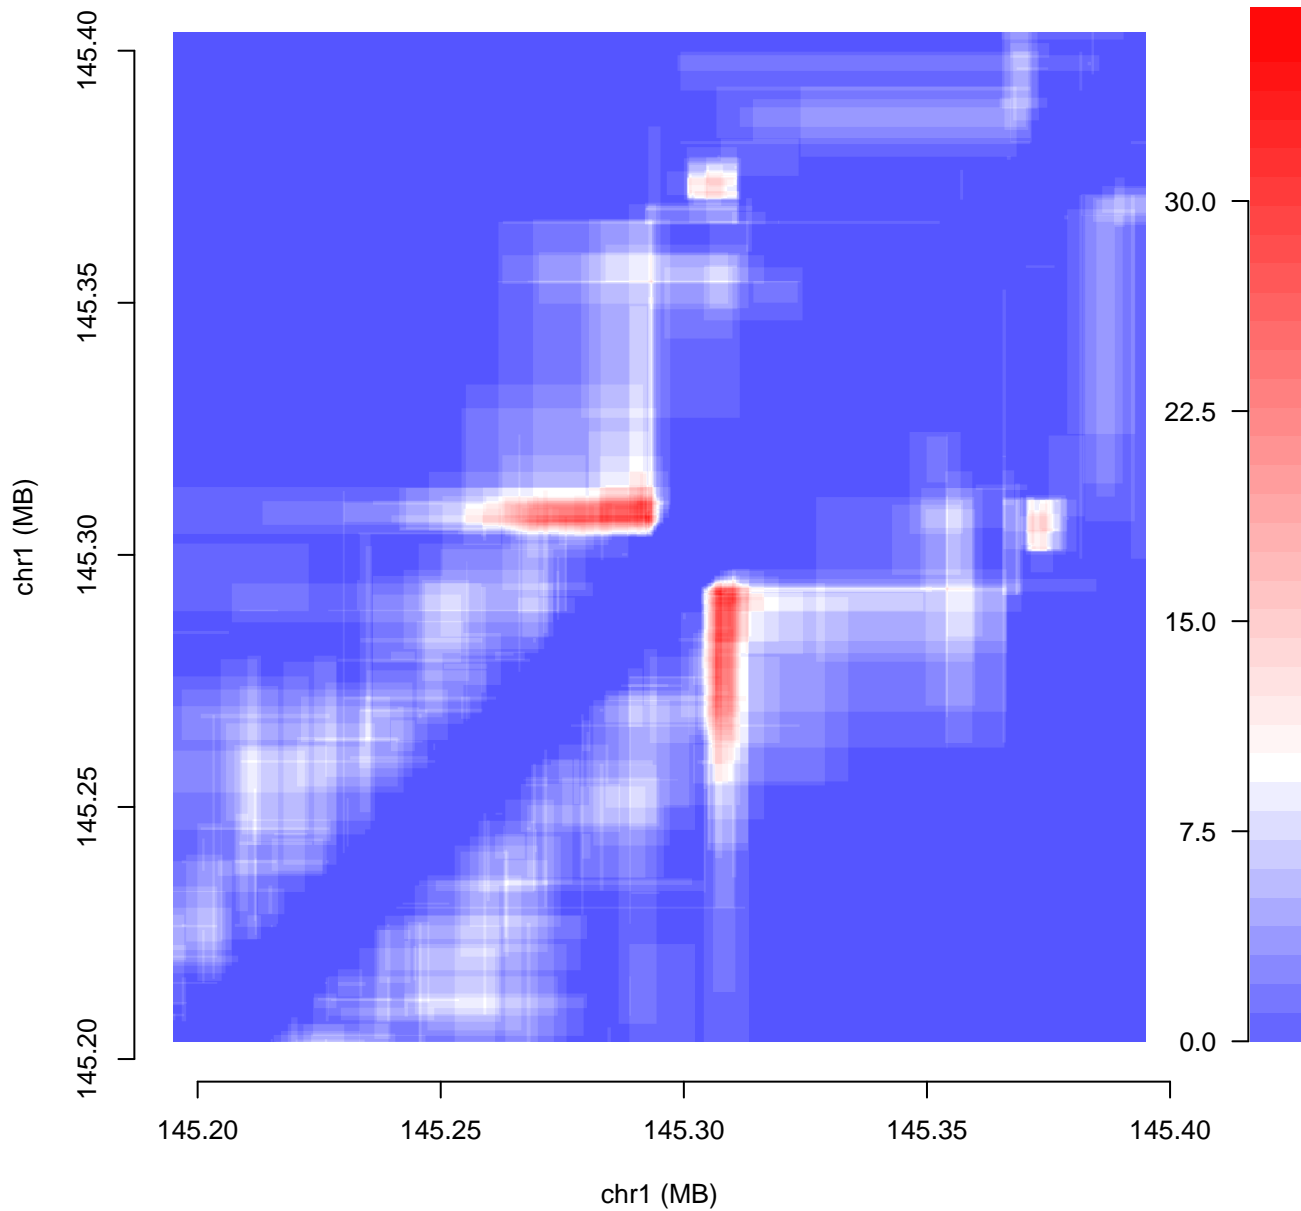

Supplement: Supplemental_Data.zip [file event_107.pdf › event_107.pdf]

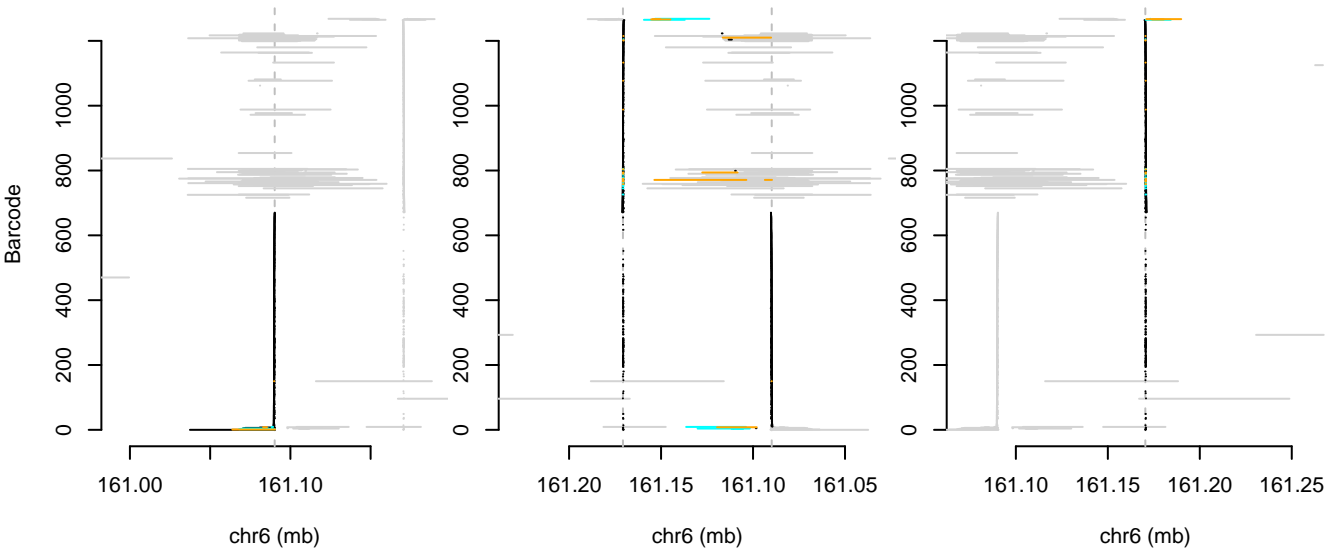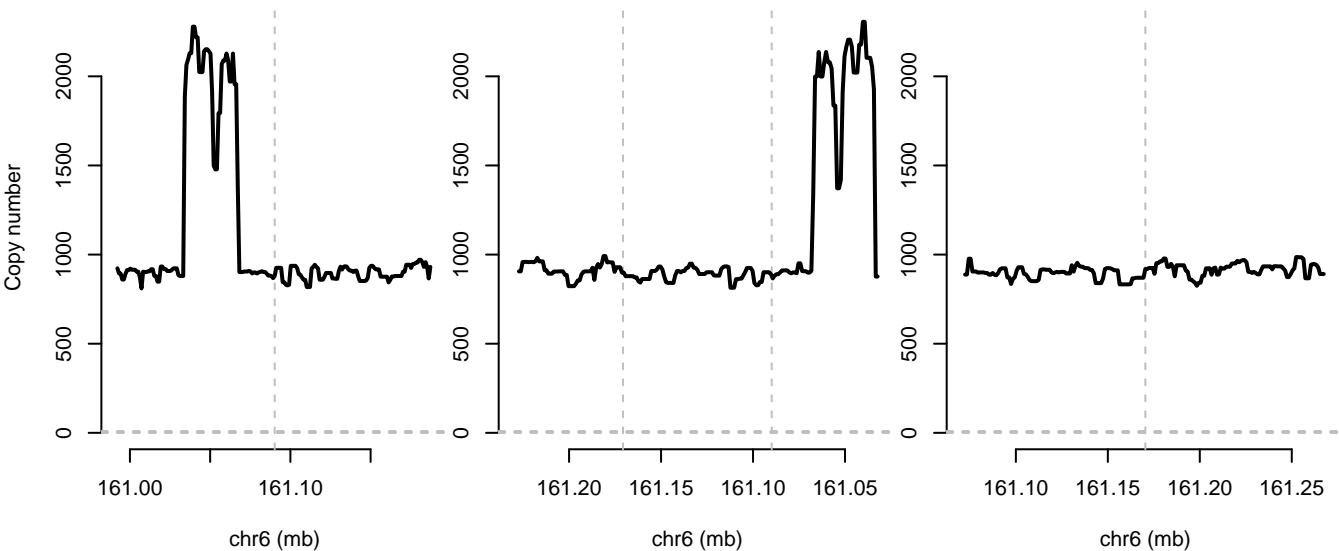

K562 chr6:161,089,836::chr6:161,170,396--

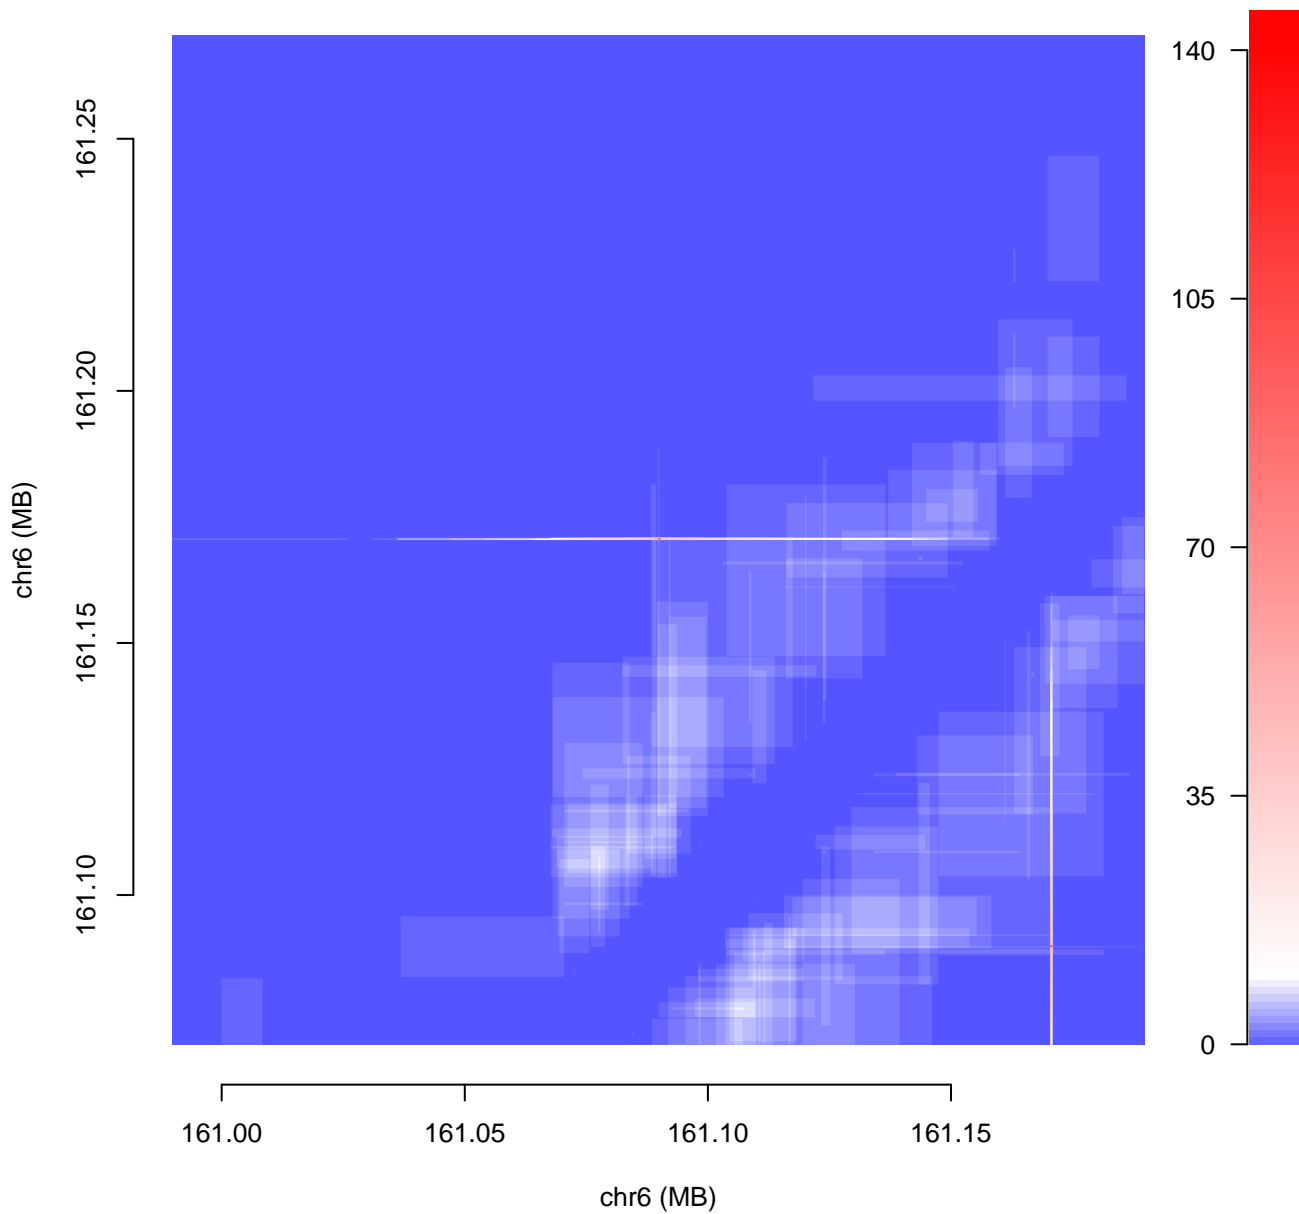

K562 chr6:161,089,836::chr6:161,170,724-+

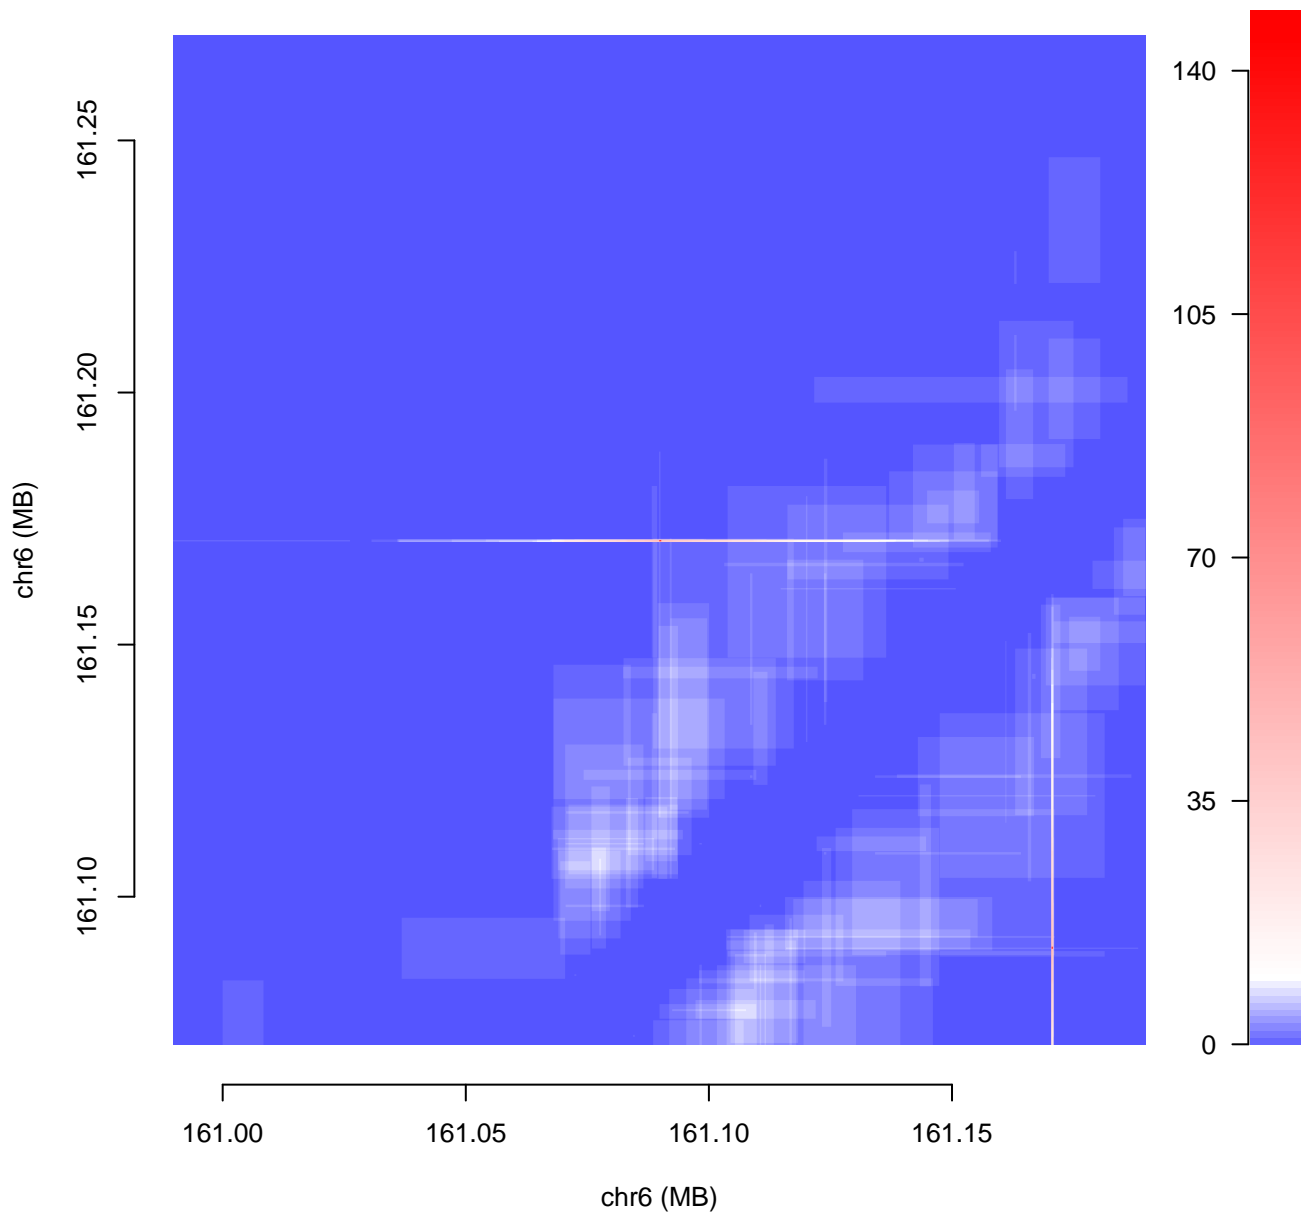

K562 chr6:161,090,216::chr6:161,170,724++

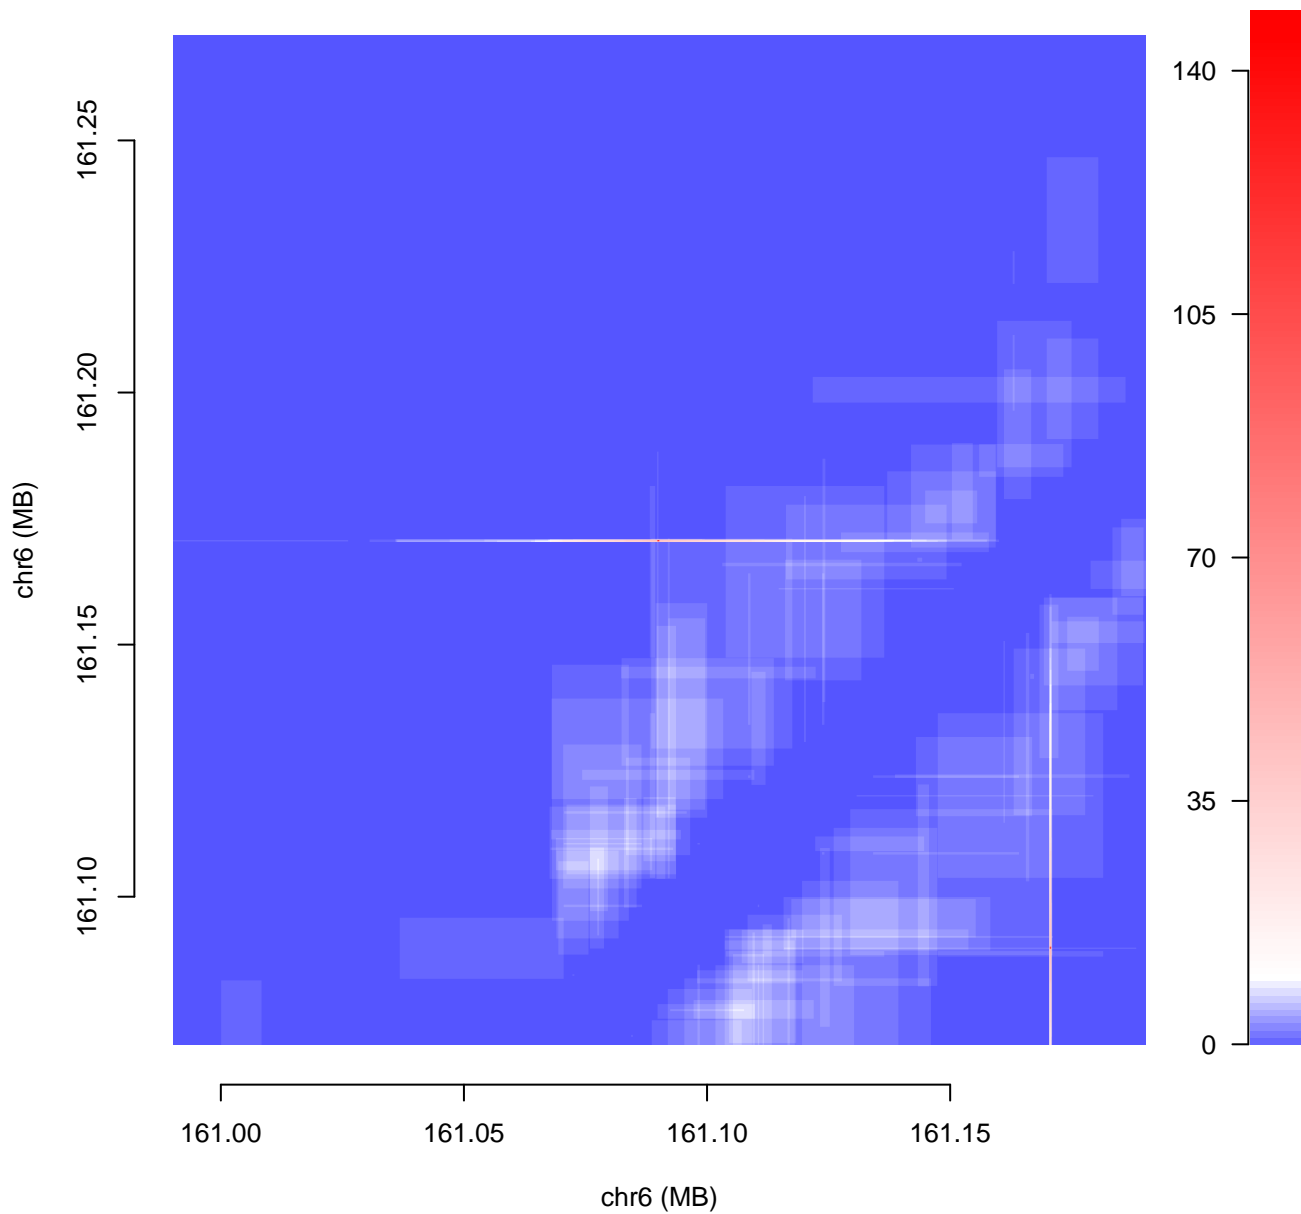

Supplement: Supplemental_Data.zip [file event_108.pdf › event_108.pdf]

Barcode

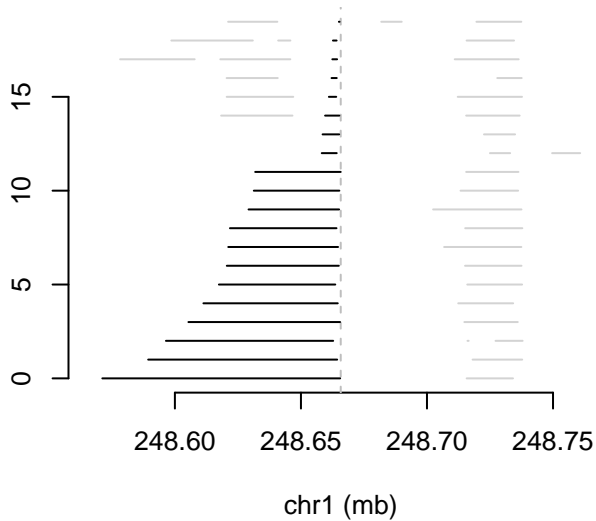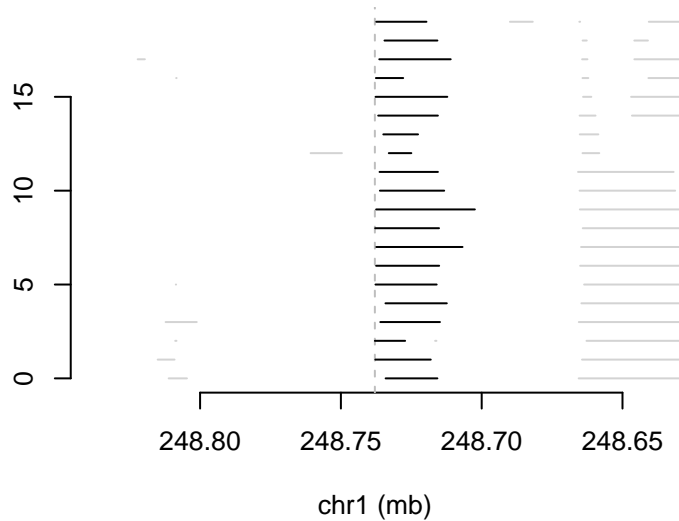

Copy number

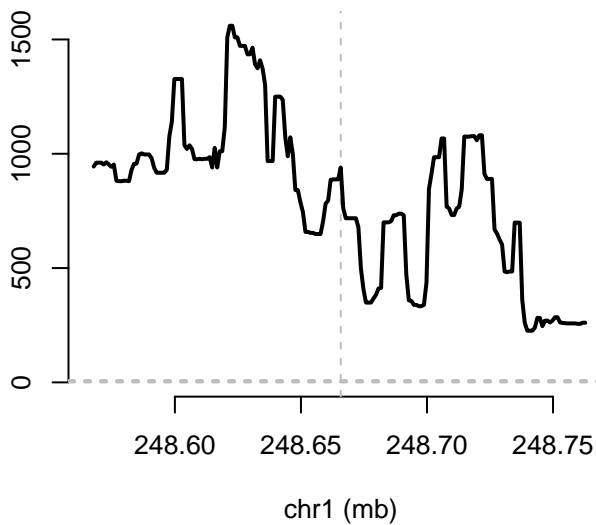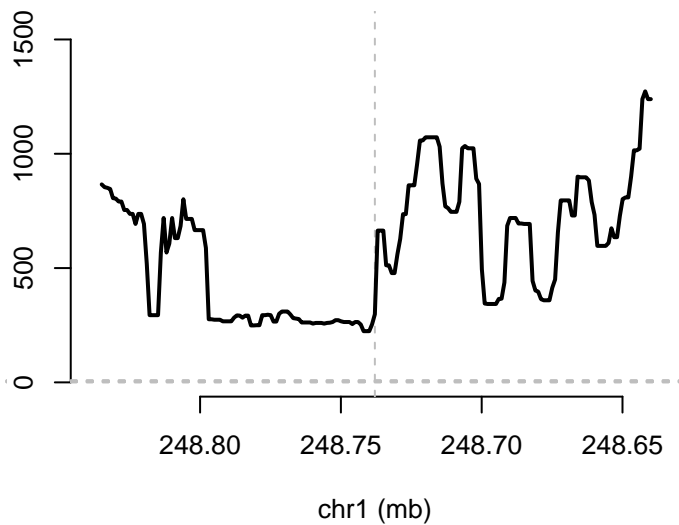

K562 chr1:248,737,937::chr1:248,665,791++

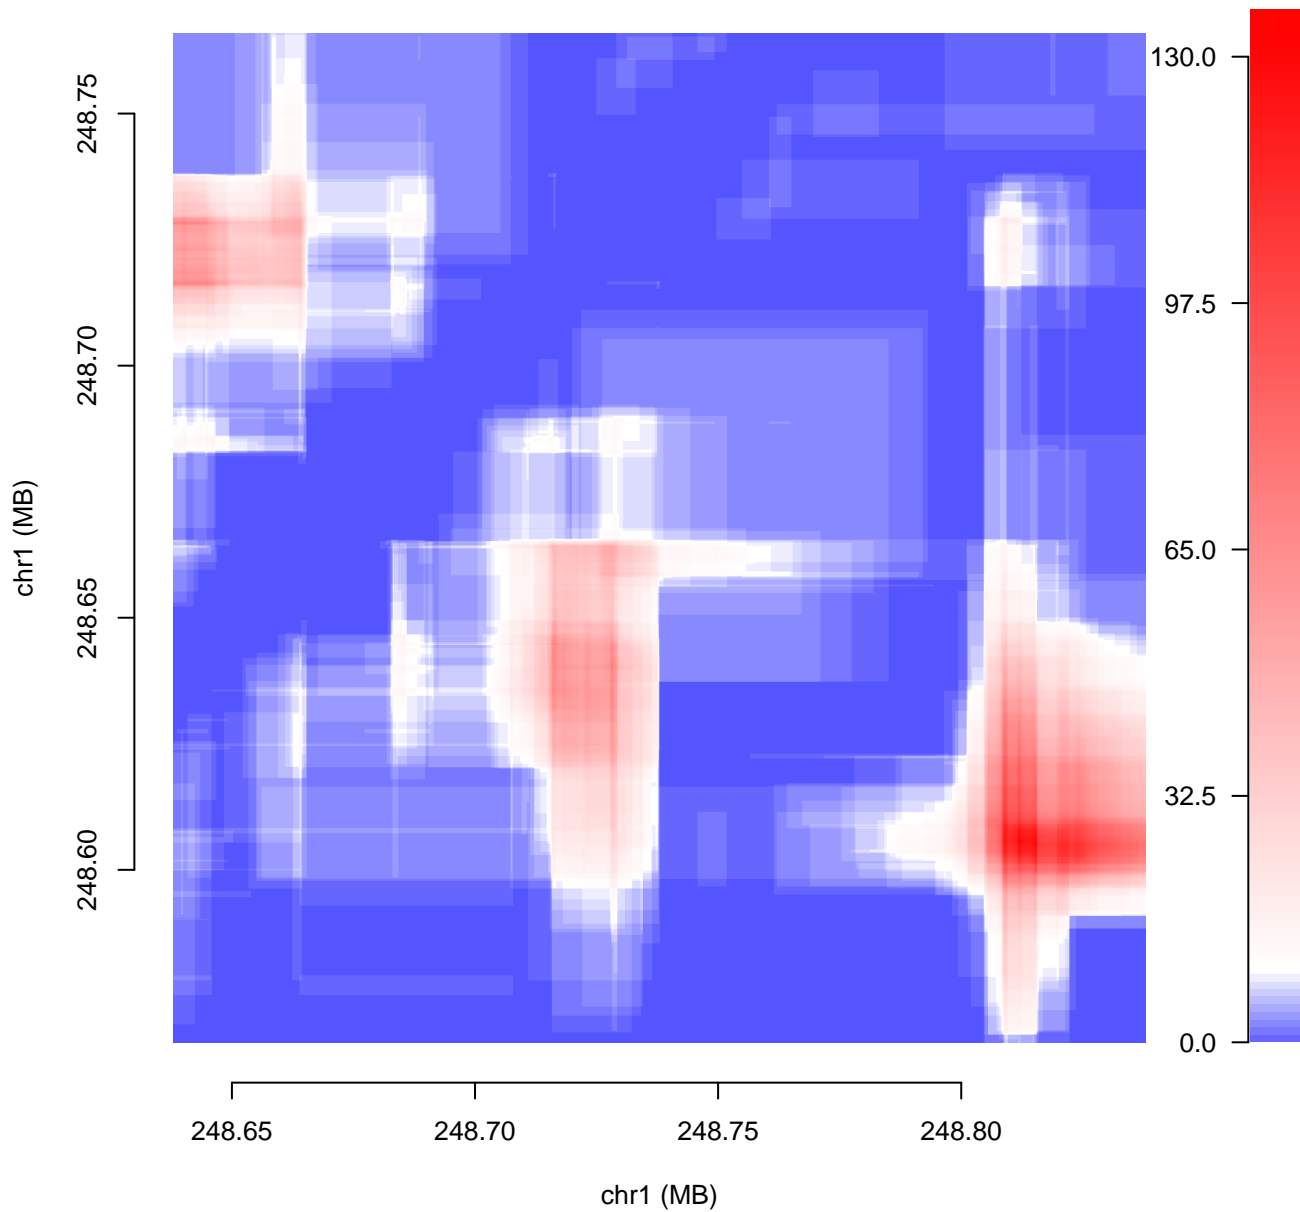

Supplement: Supplemental_Data.zip [file event_109.pdf › event_109.pdf]

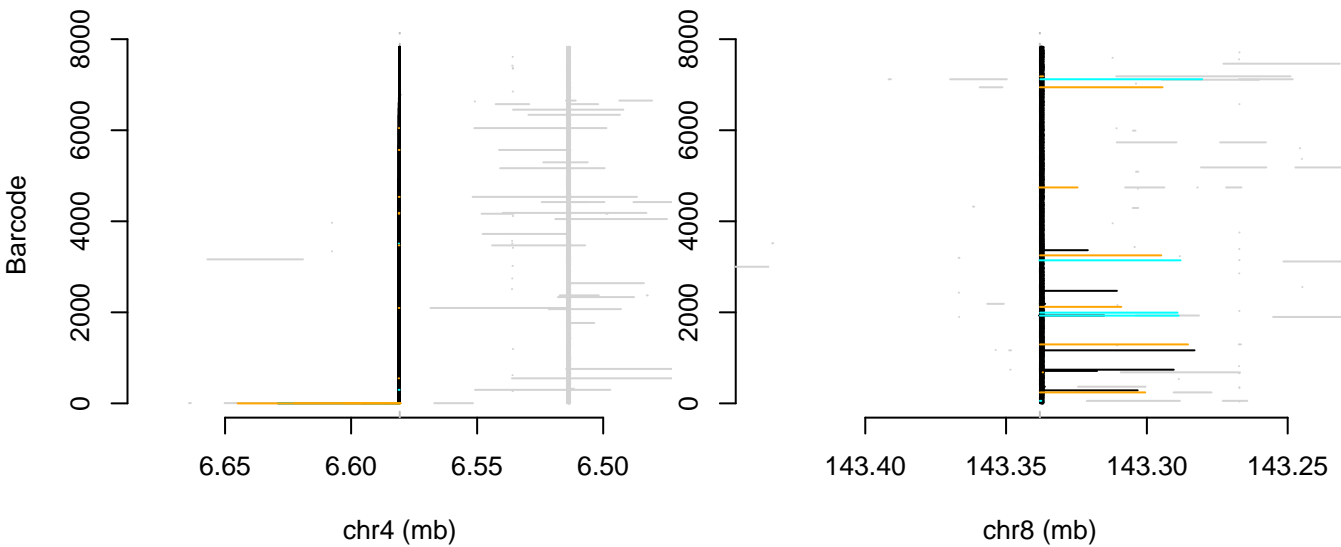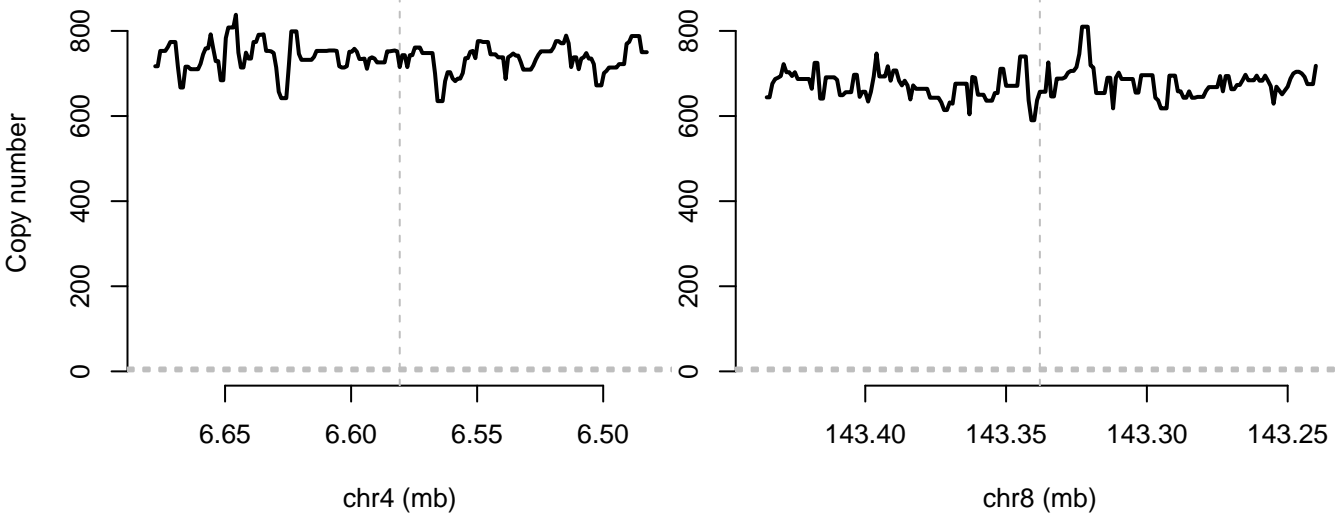

K562 chr8:143,338,001::chr4:6,580,709+-

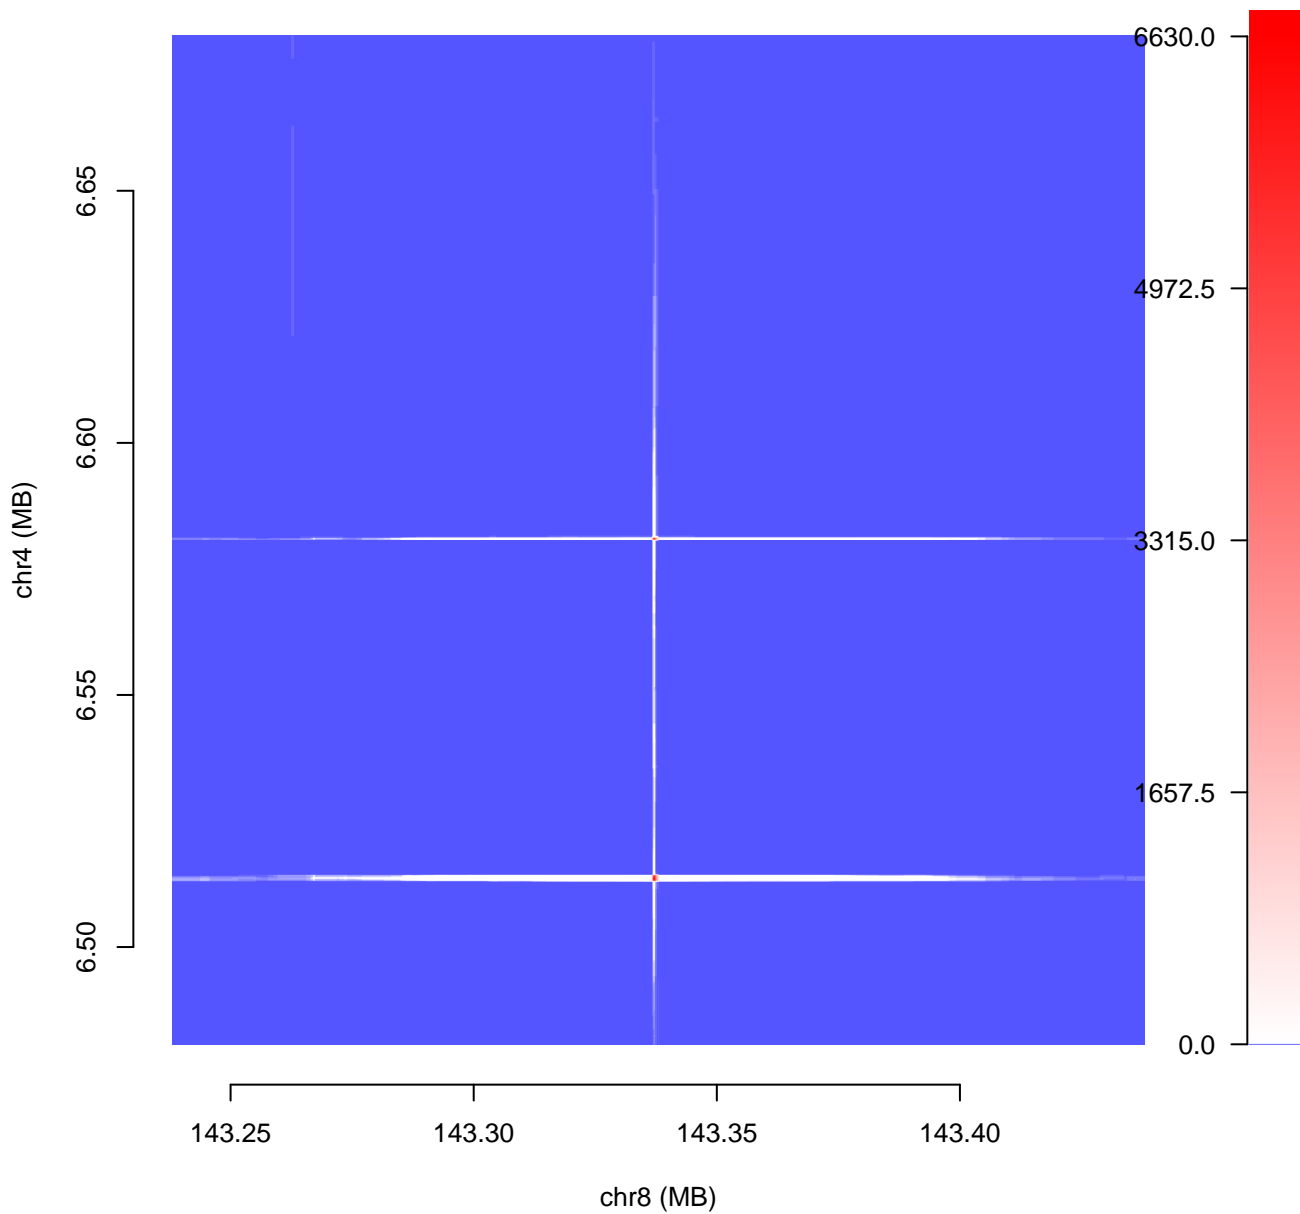

Supplement: Supplemental_Data.zip [file event_11.pdf › event_11.pdf]

Barcode

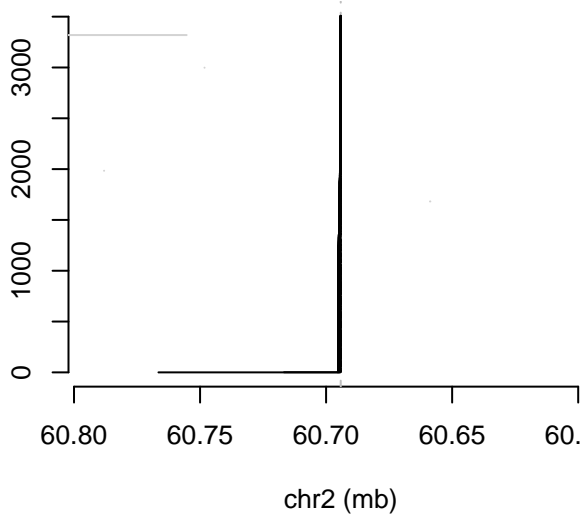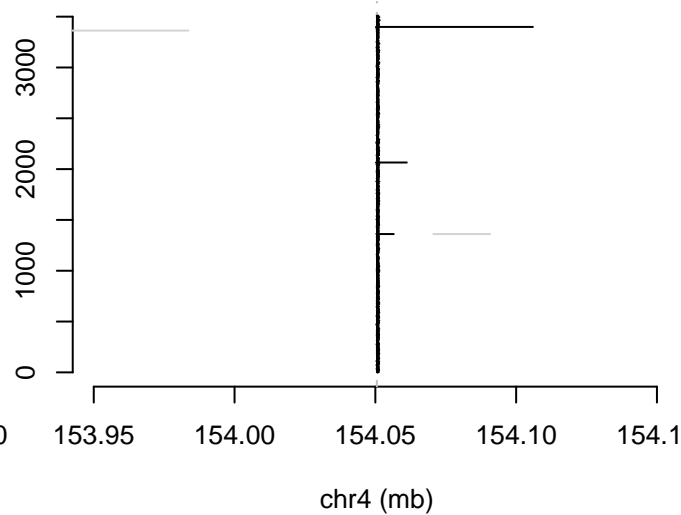

Copy number

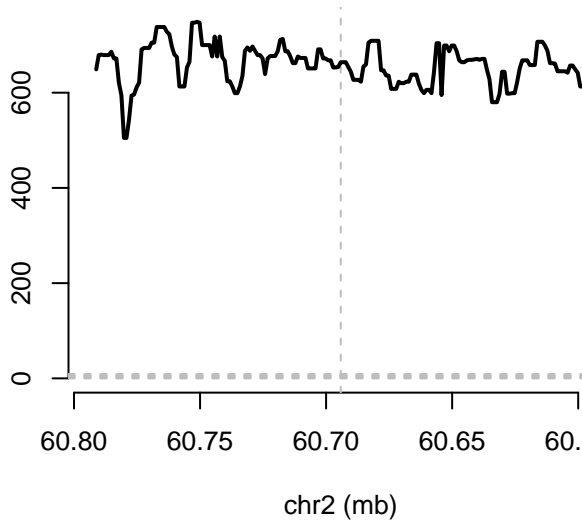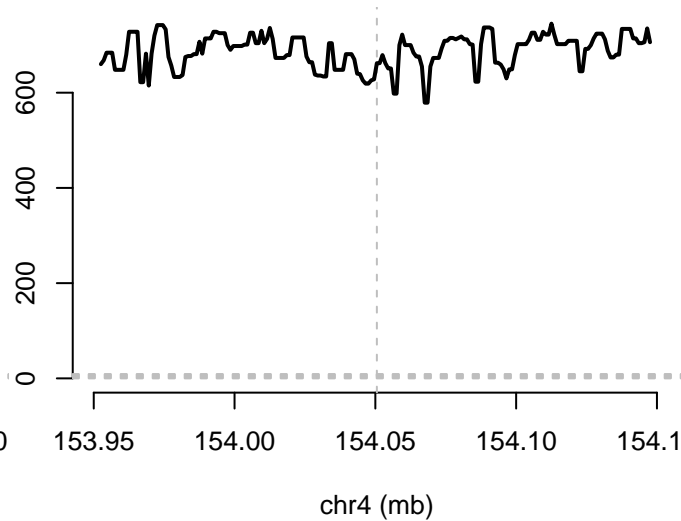

K562 chr4:154,050,542::chr2:60,694,193--

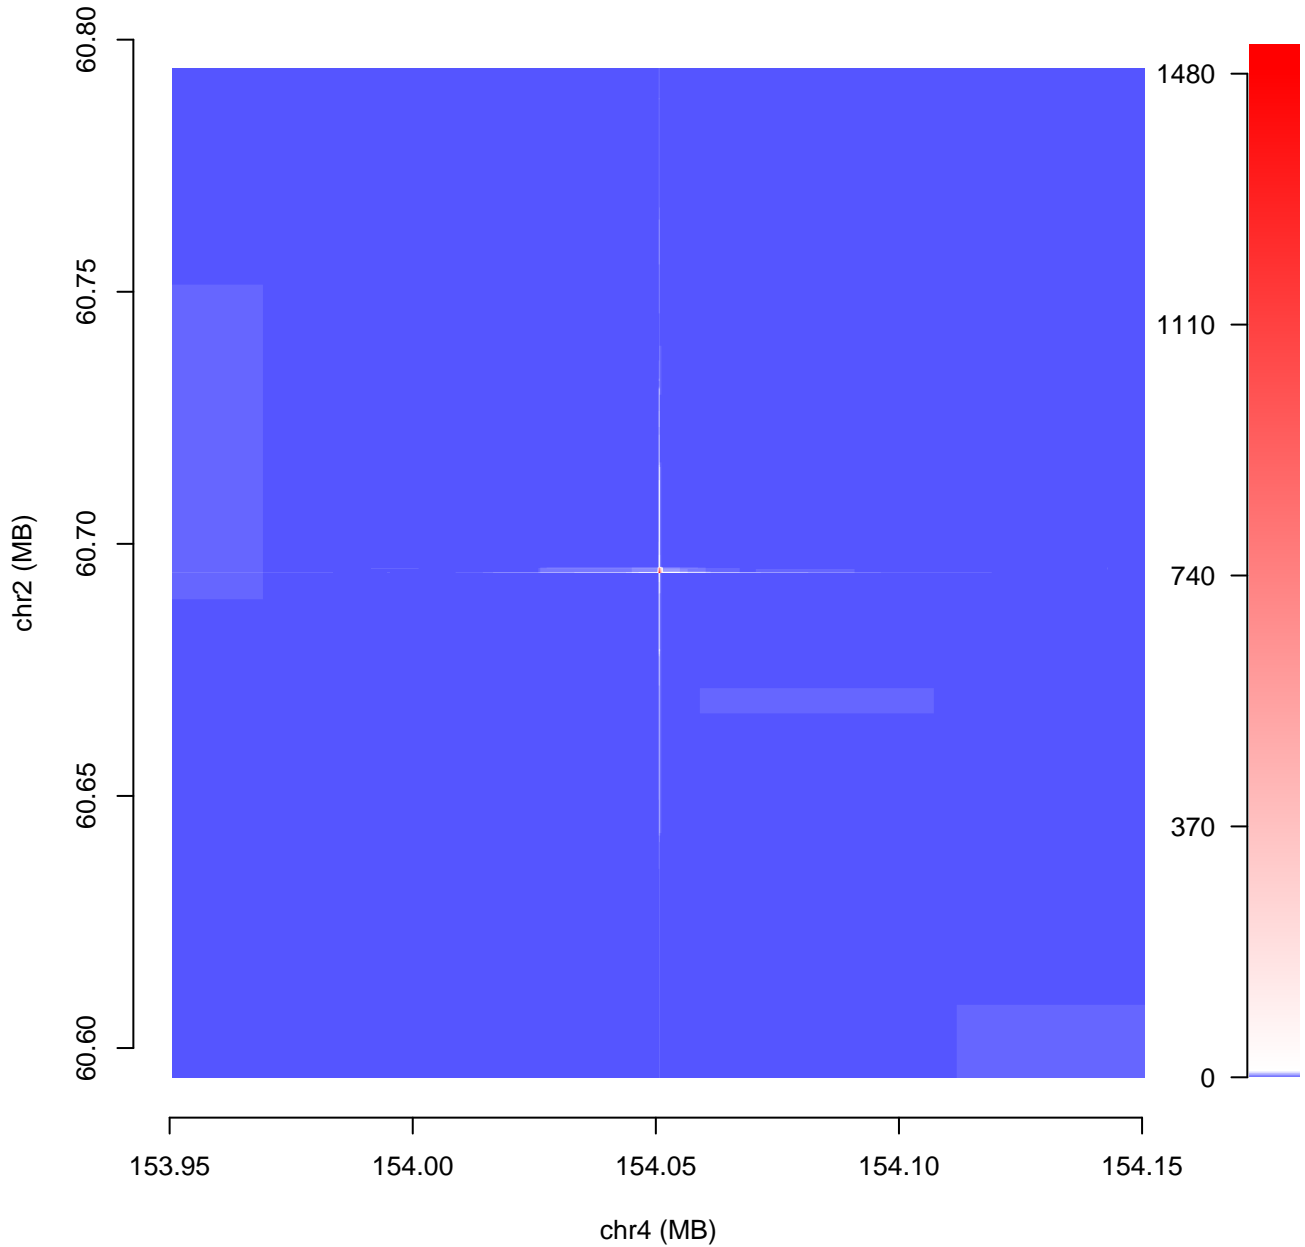

Supplement: Supplemental_Data.zip [file event_110.pdf › event_110.pdf]

Barcode

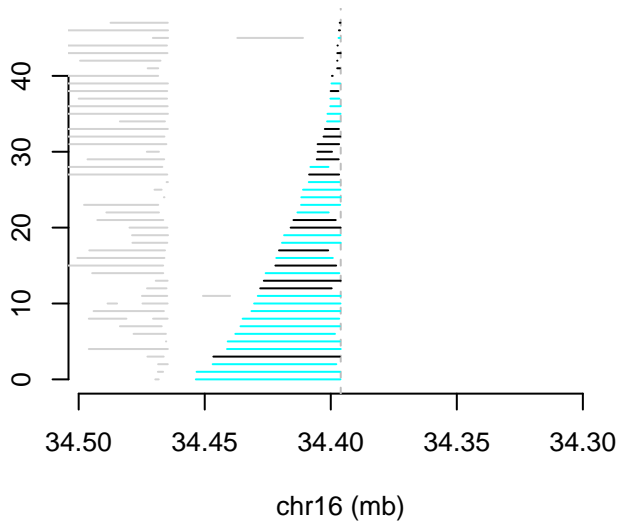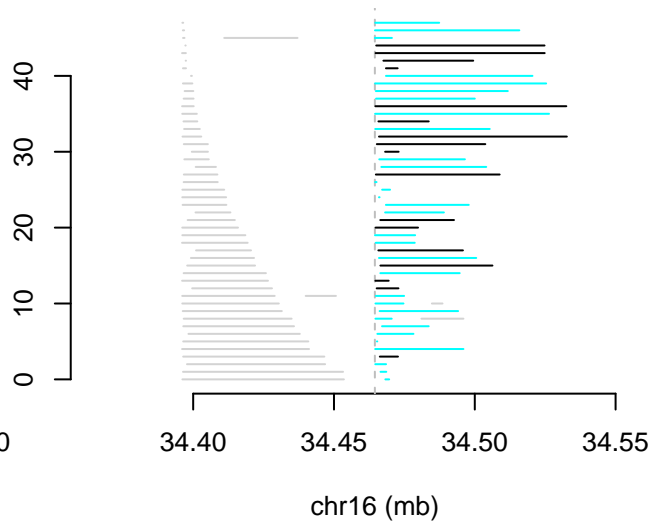

Copy number

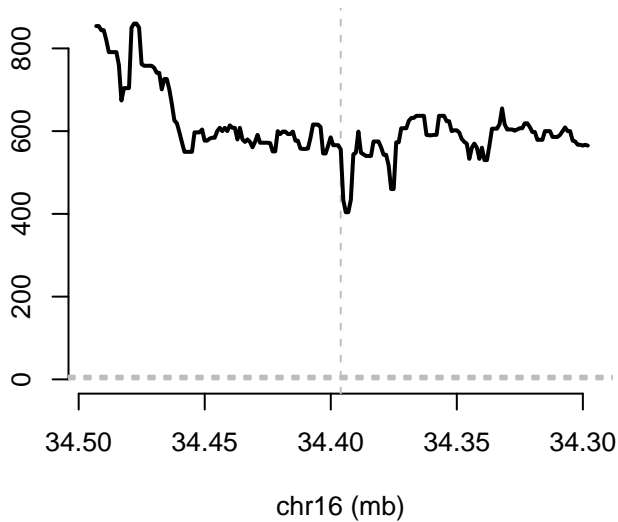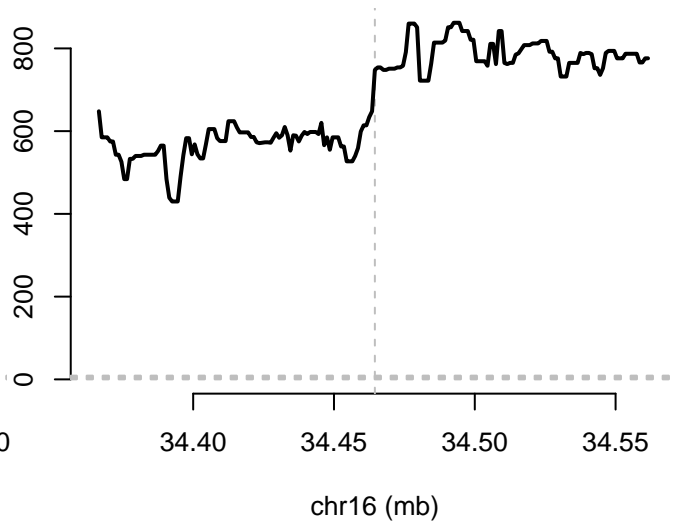

K562 chr16:34,464,522::chr16:34,396,045--

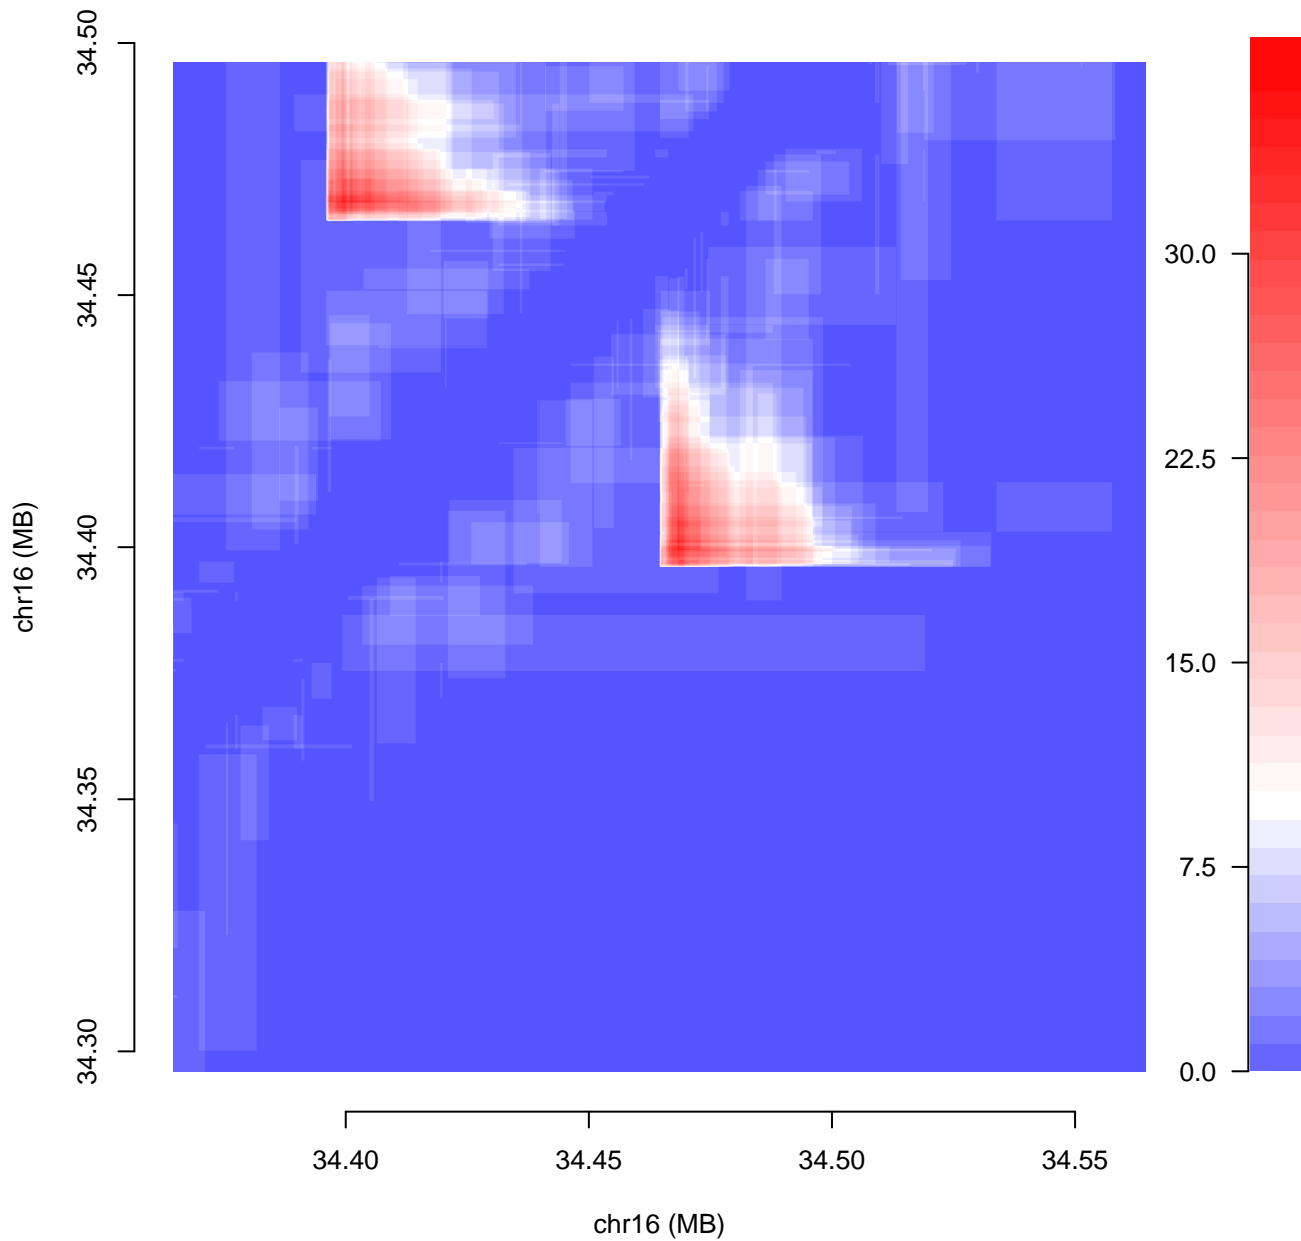

Supplement: Supplemental_Data.zip [file event_111.pdf › event_111.pdf]

Barcode

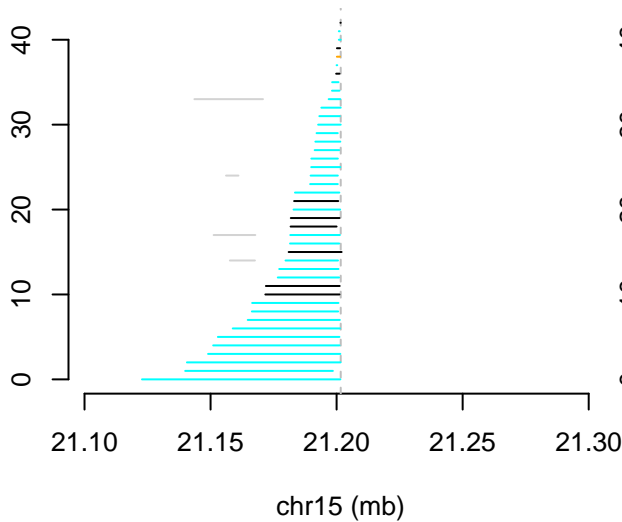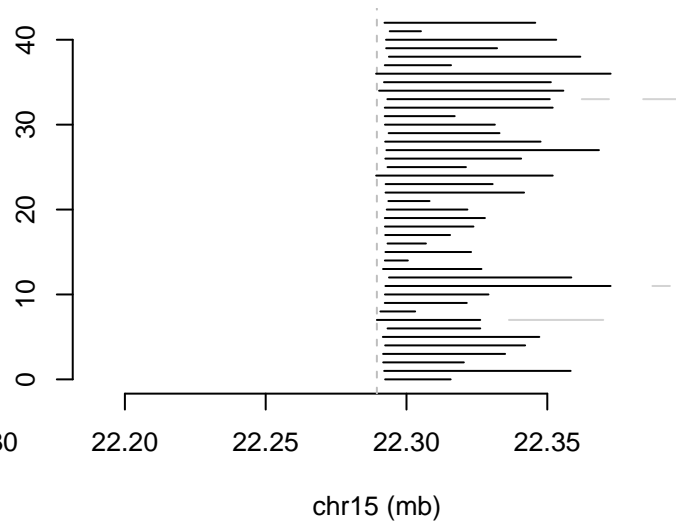

Copy number

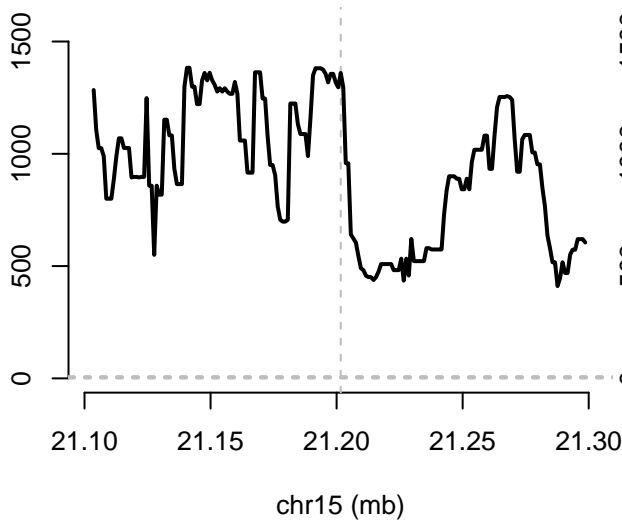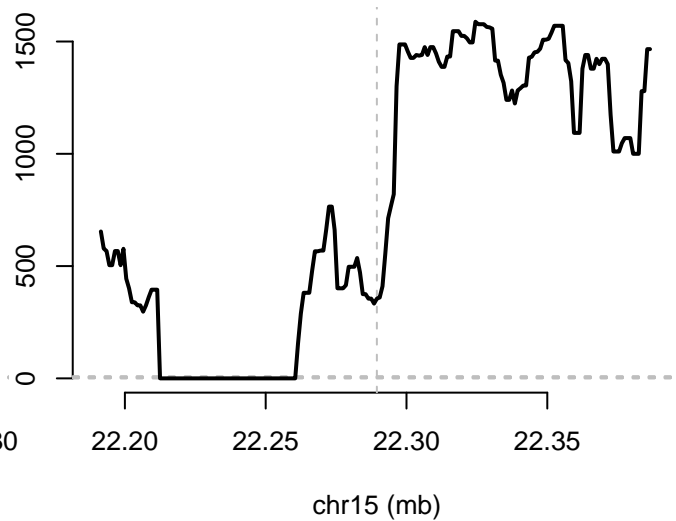

K562 chr15:22,289,485::chr15:21,201,639-+

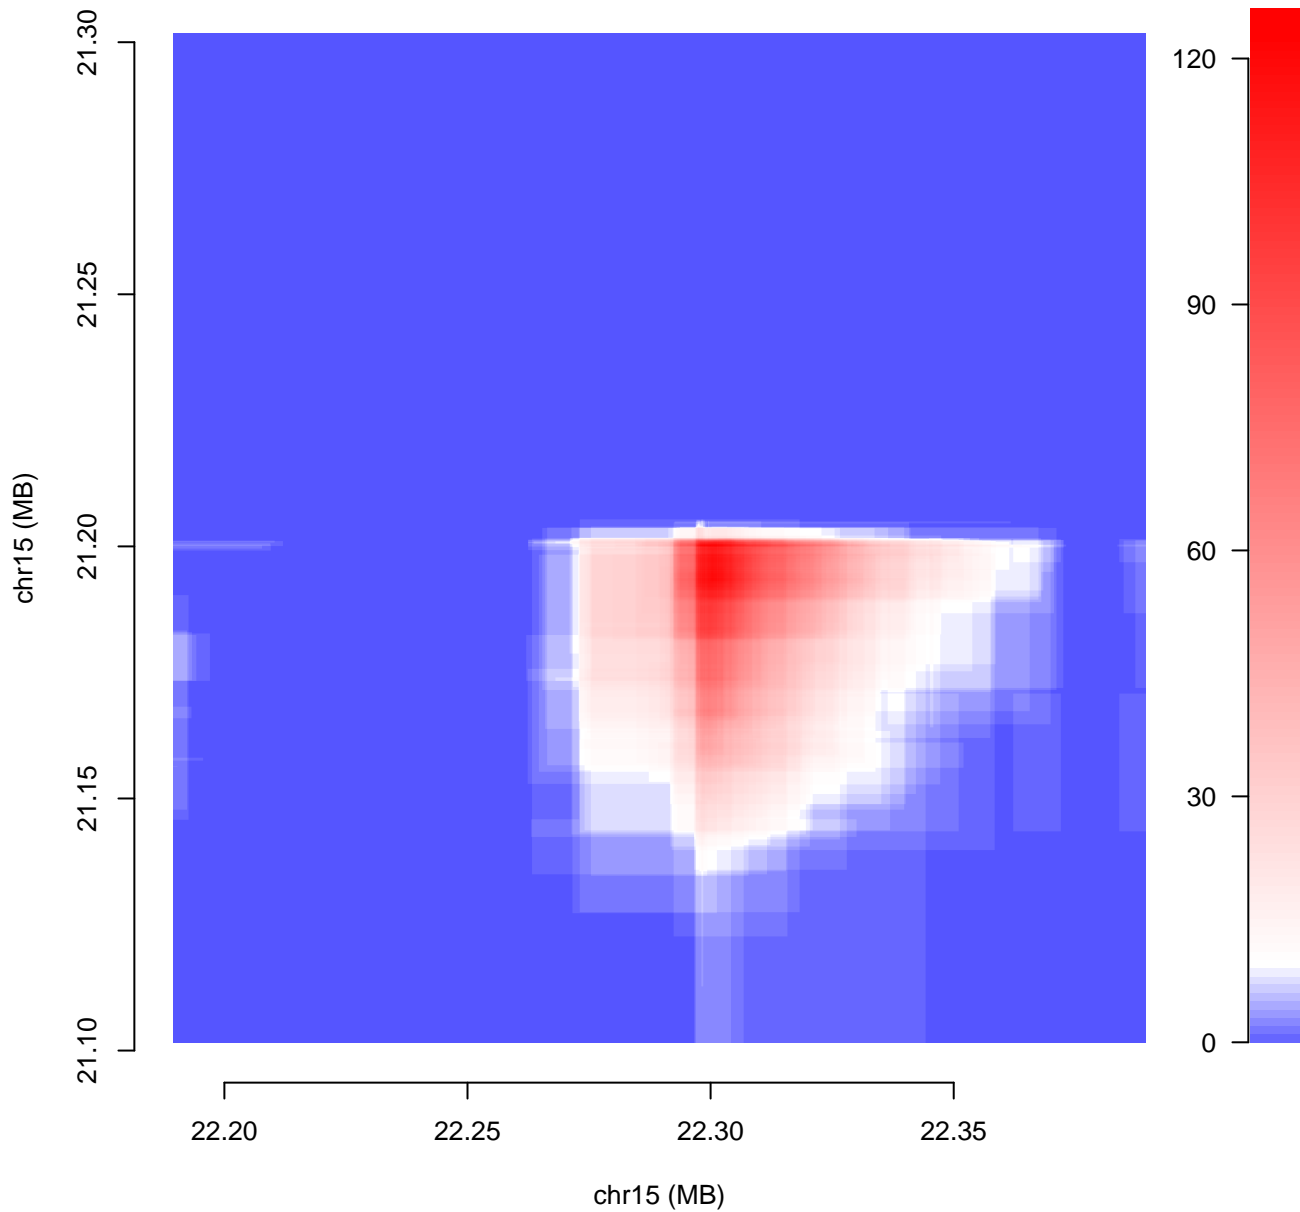

Supplement: Supplemental_Data.zip [file event_112.pdf › event_112.pdf]

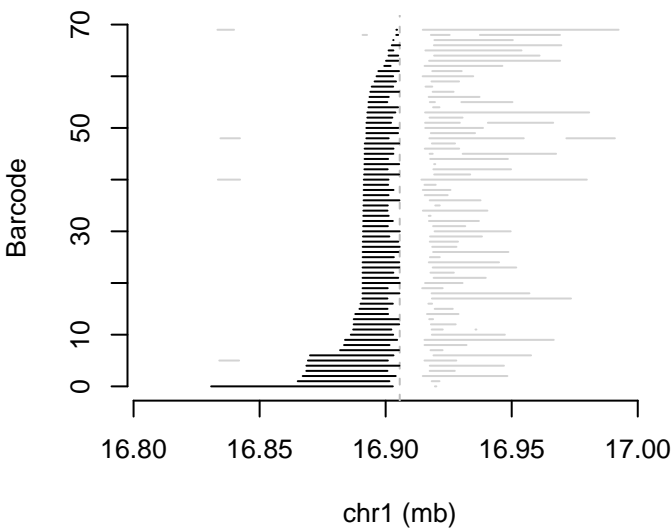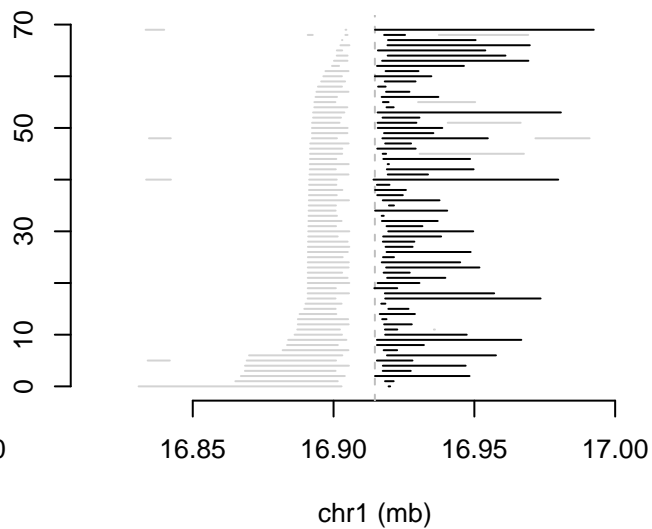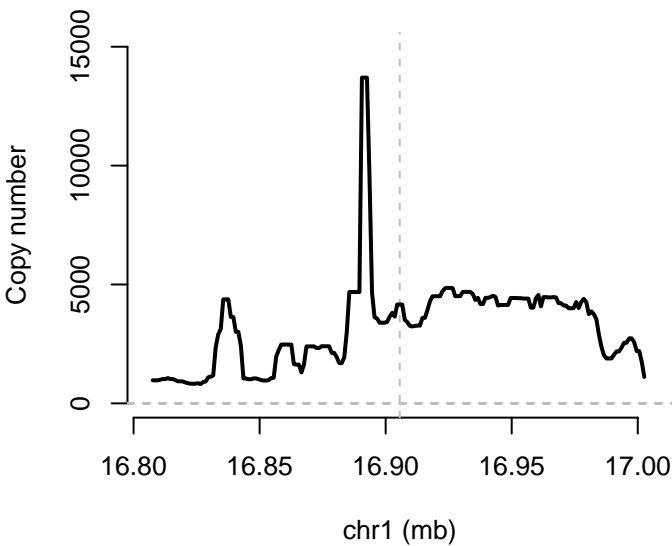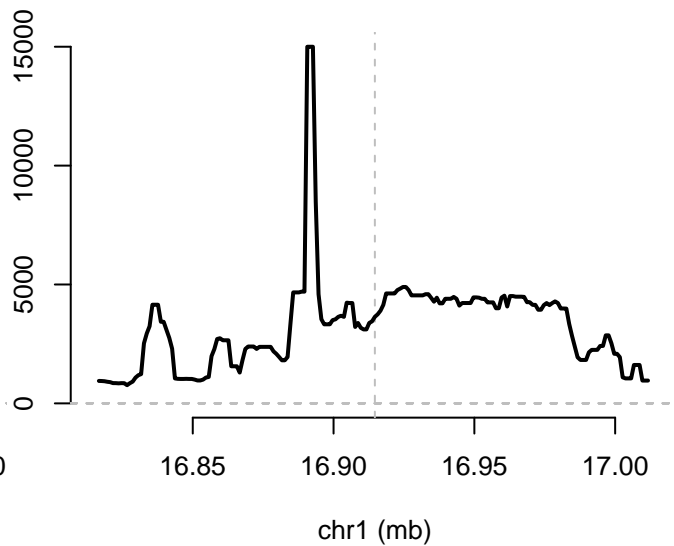

K562 chr1:16,905,587::chr1:16,914,673+-

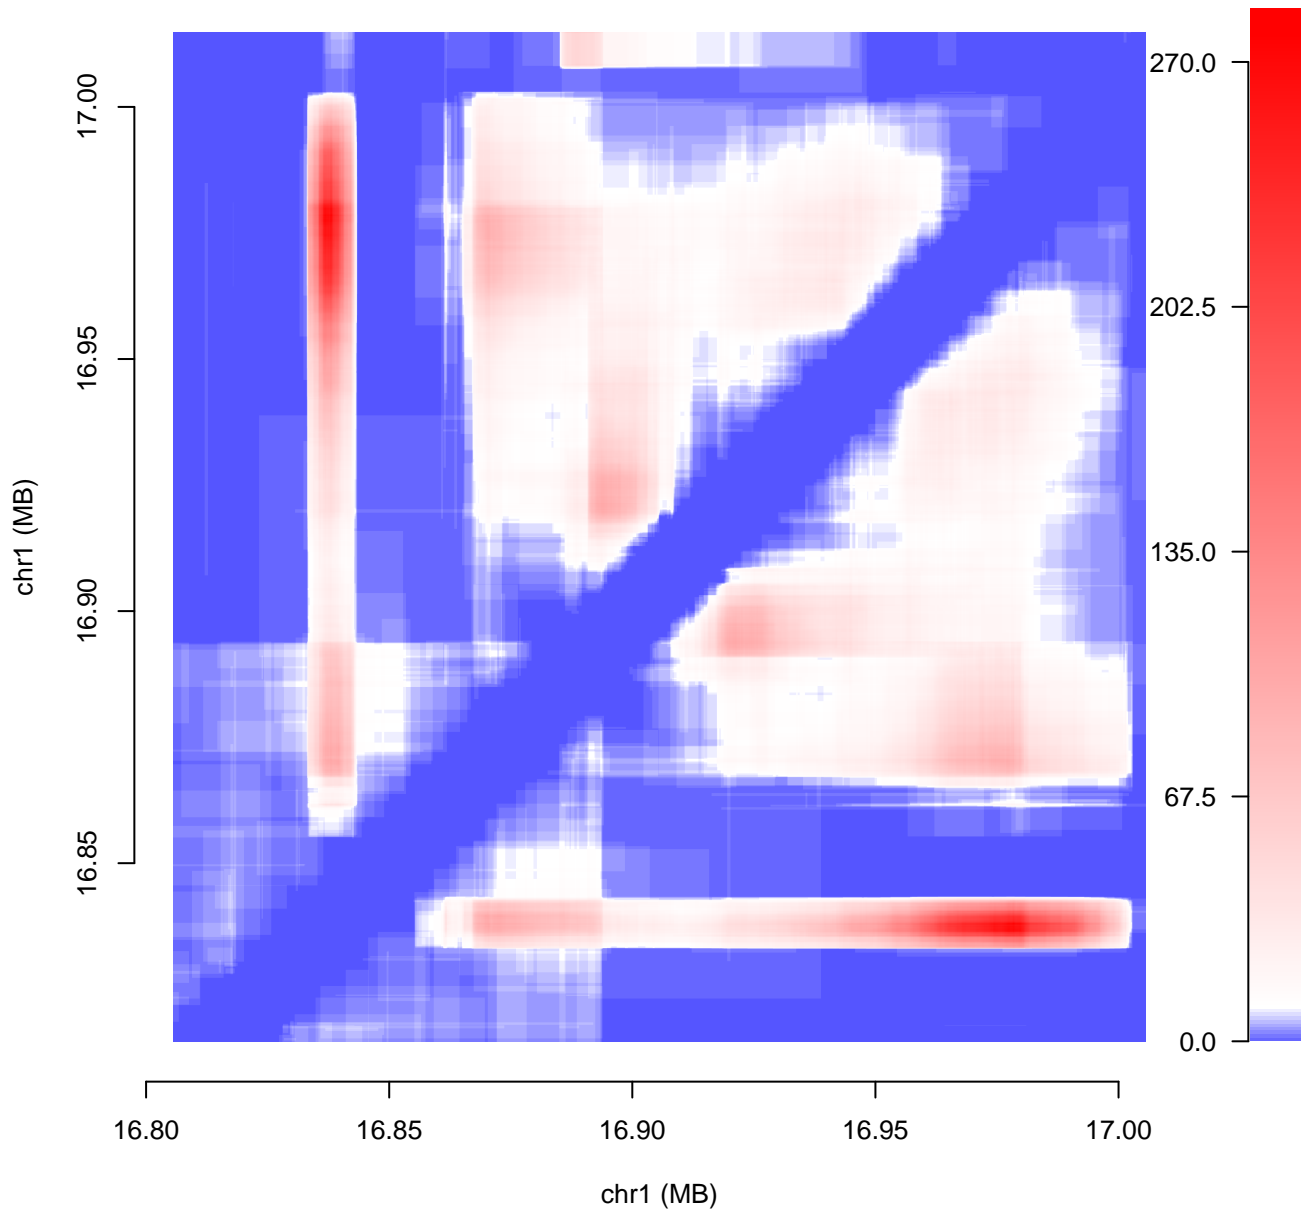

Supplement: Supplemental_Data.zip [file event_113.pdf › event_113.pdf]

Barcode

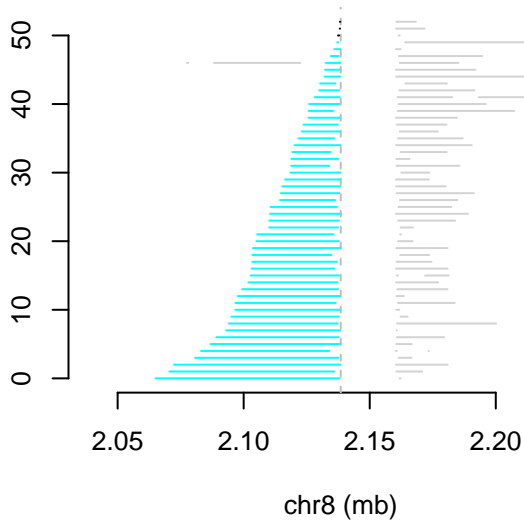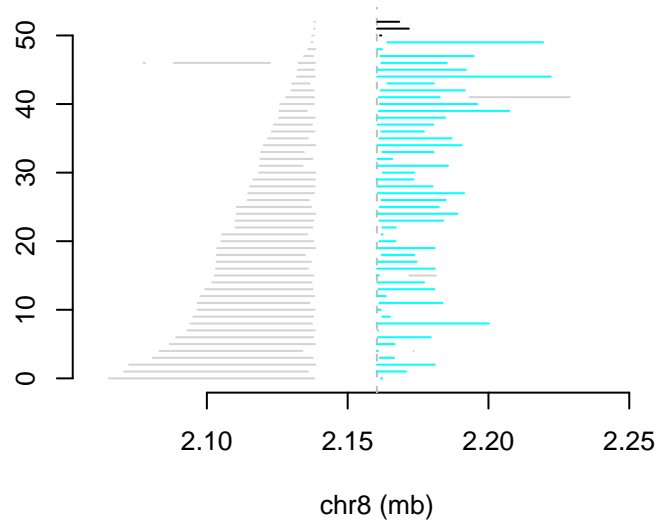

Copy number

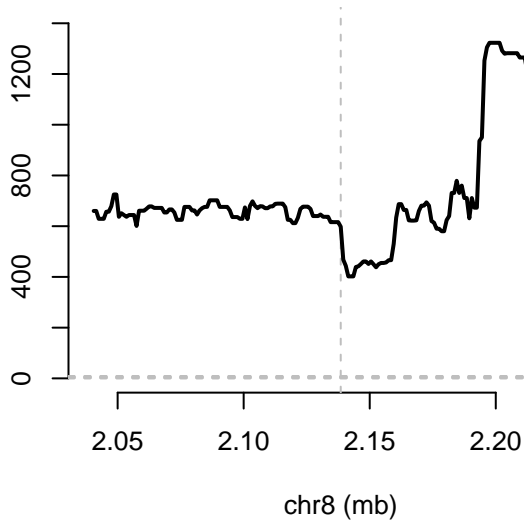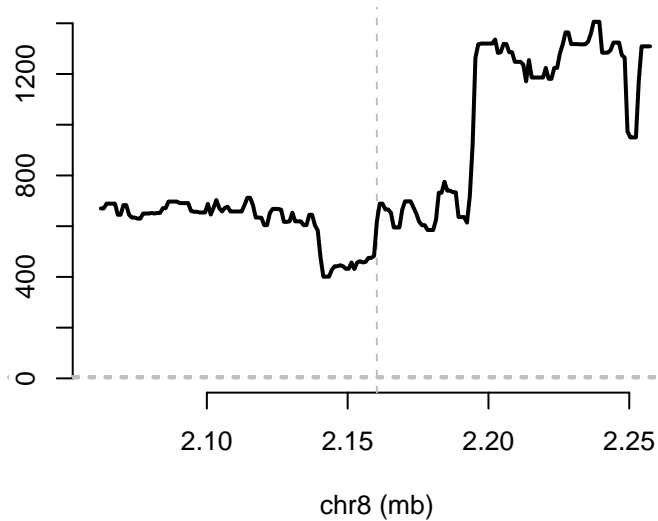

K562 chr8:2,160,368::chr8:2,138,506--+

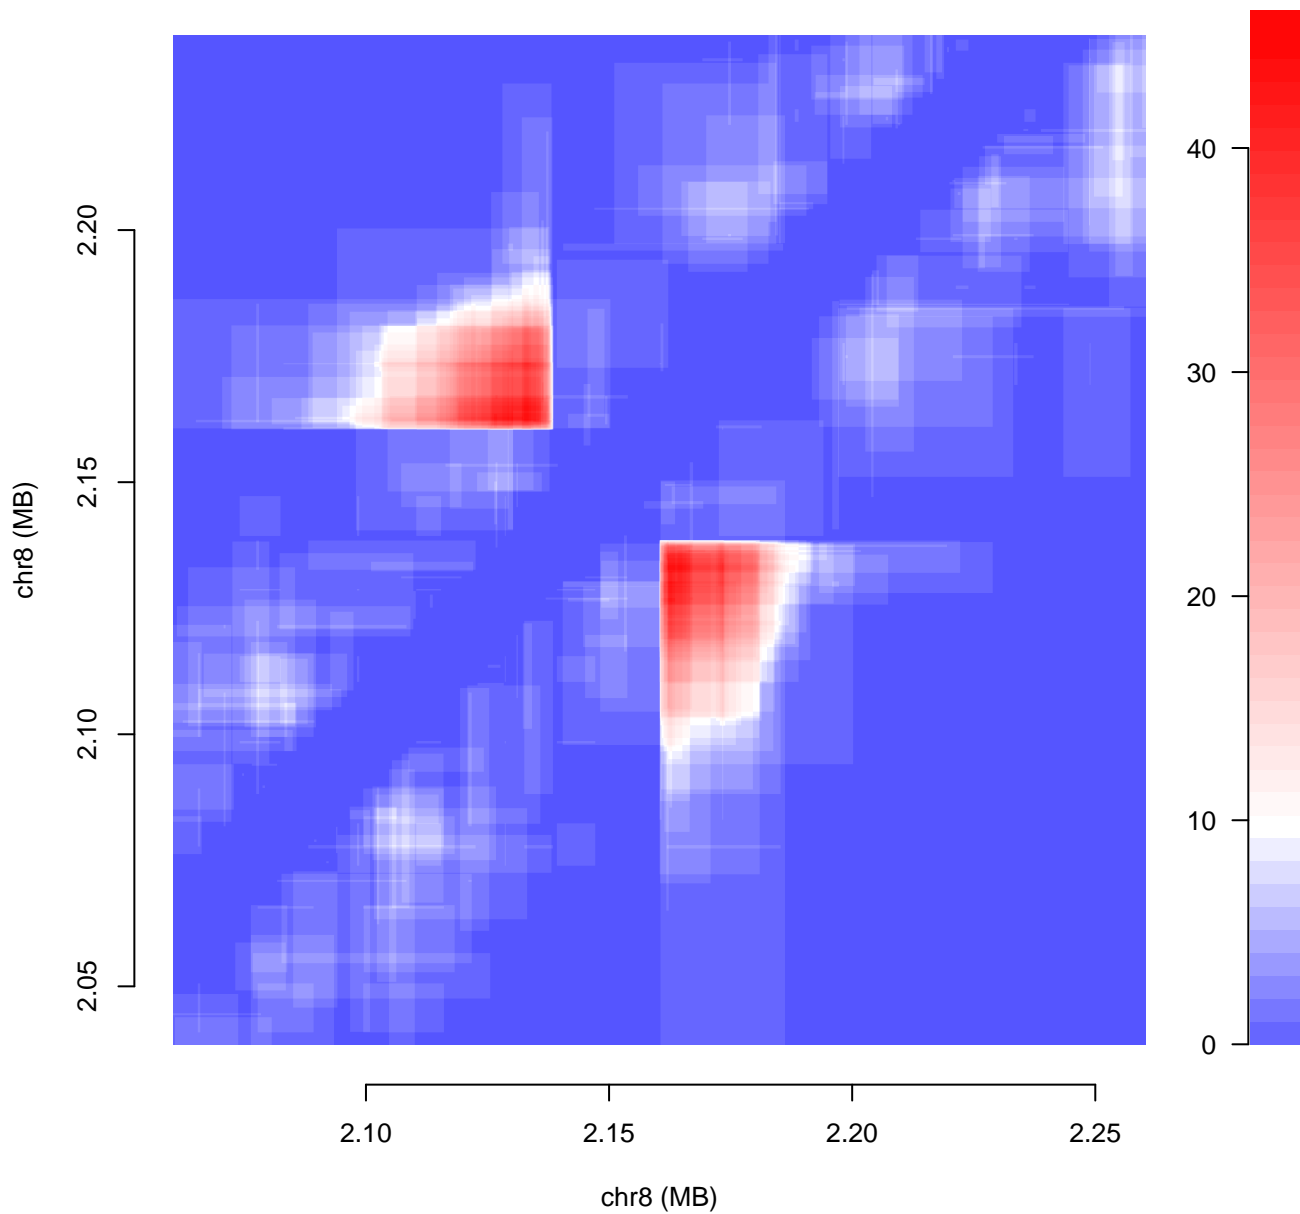

Supplement: Supplemental_Data.zip [file event_114.pdf › event_114.pdf]

Barcode

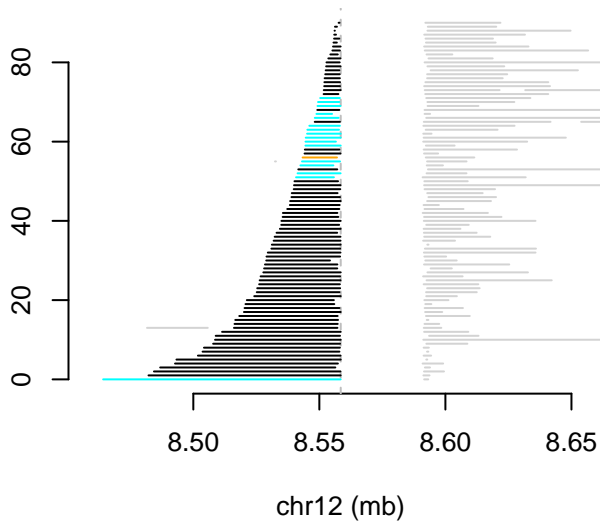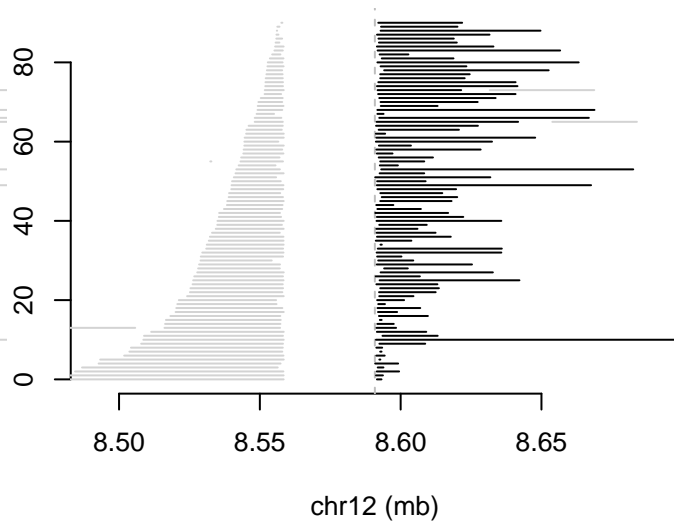

Copy number

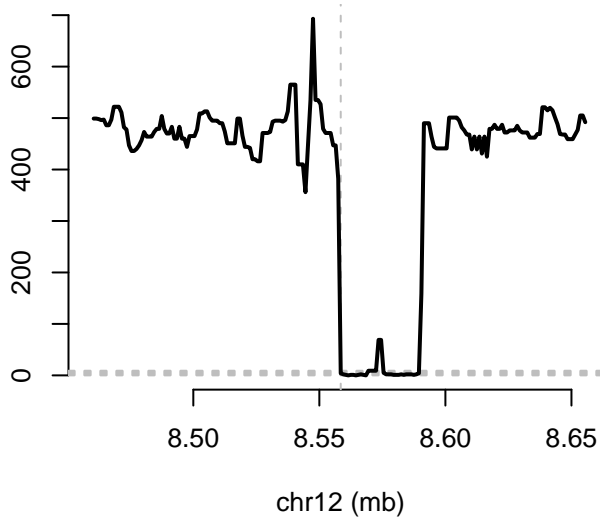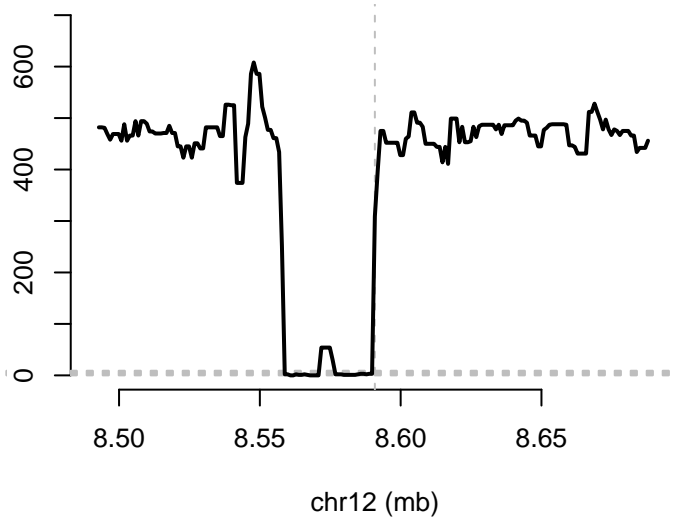

K562 chr12:8,590,846::chr12:8,558,486-+

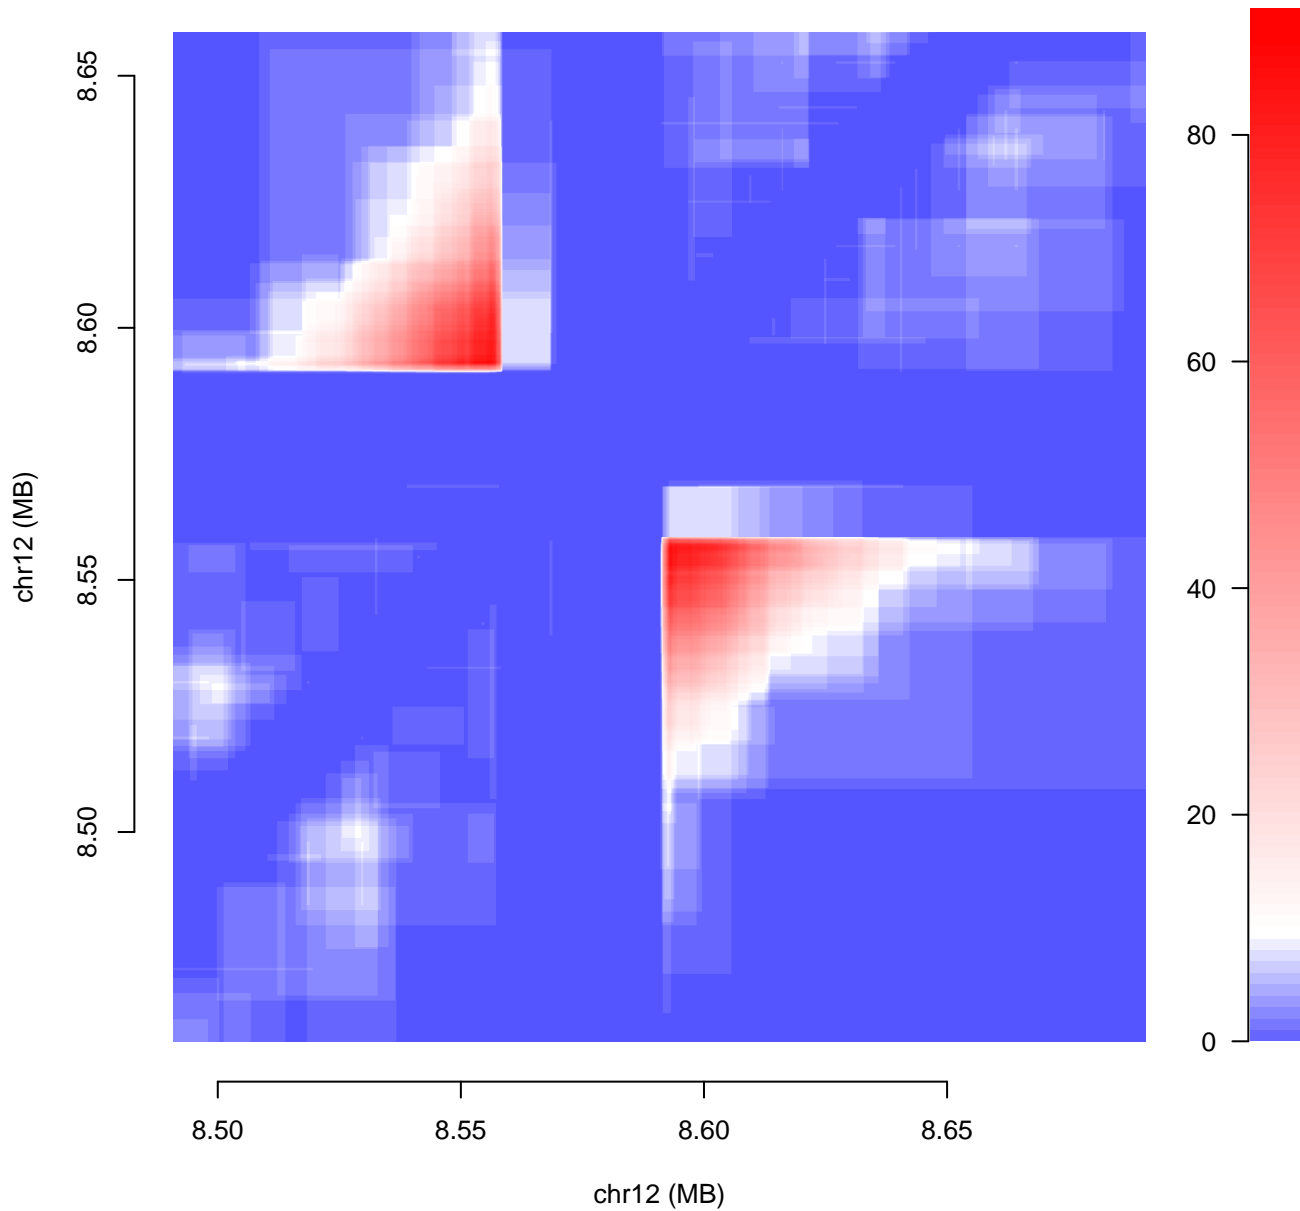

Supplement: Supplemental_Data.zip [file event_115.pdf › event_115.pdf]

Barcode

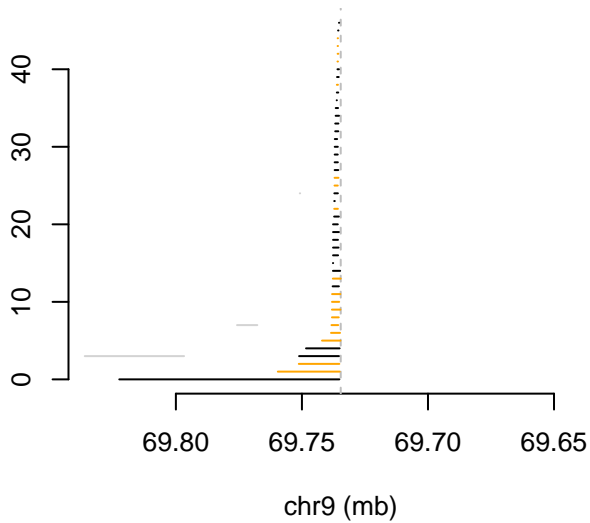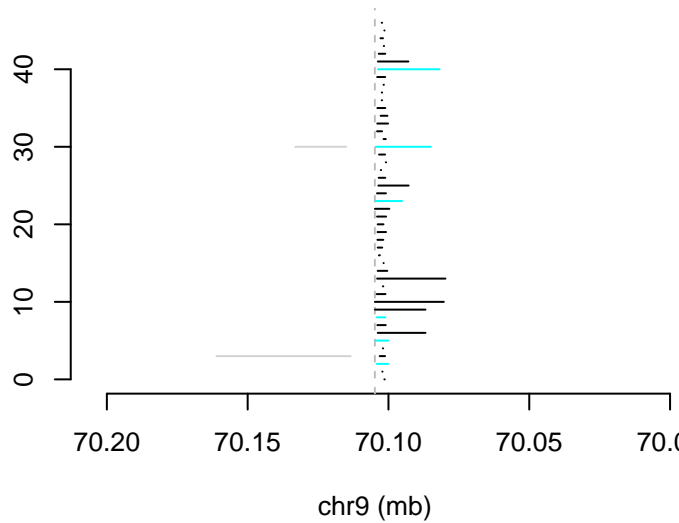

Copy number

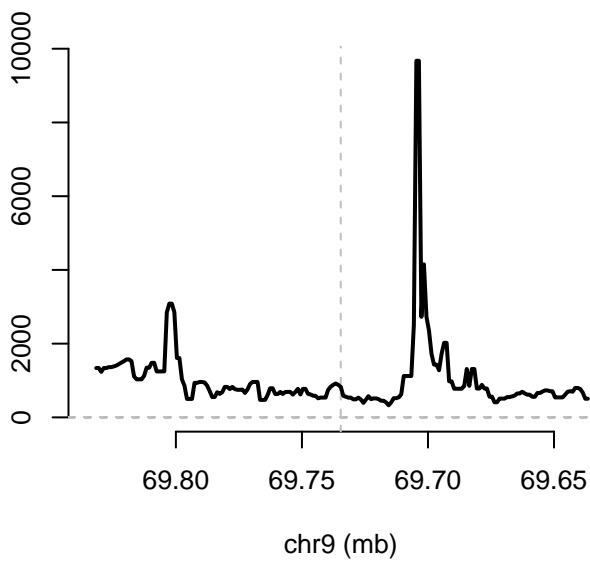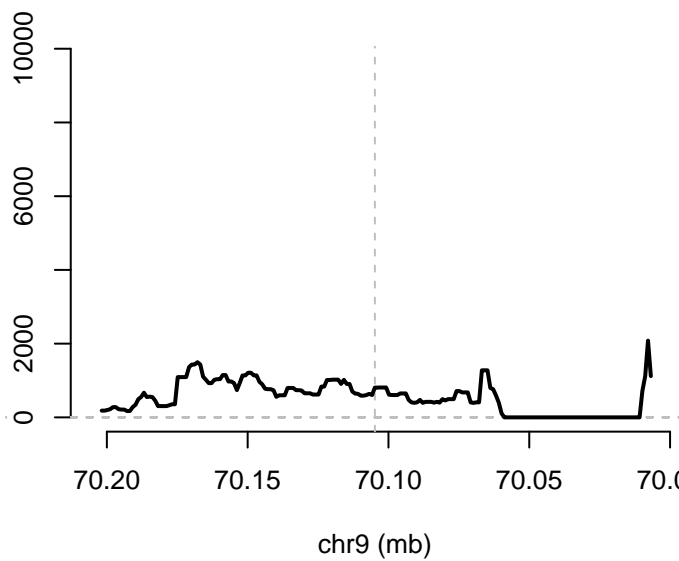

K562 chr9:69,734,604::chr9:70,104,826-+

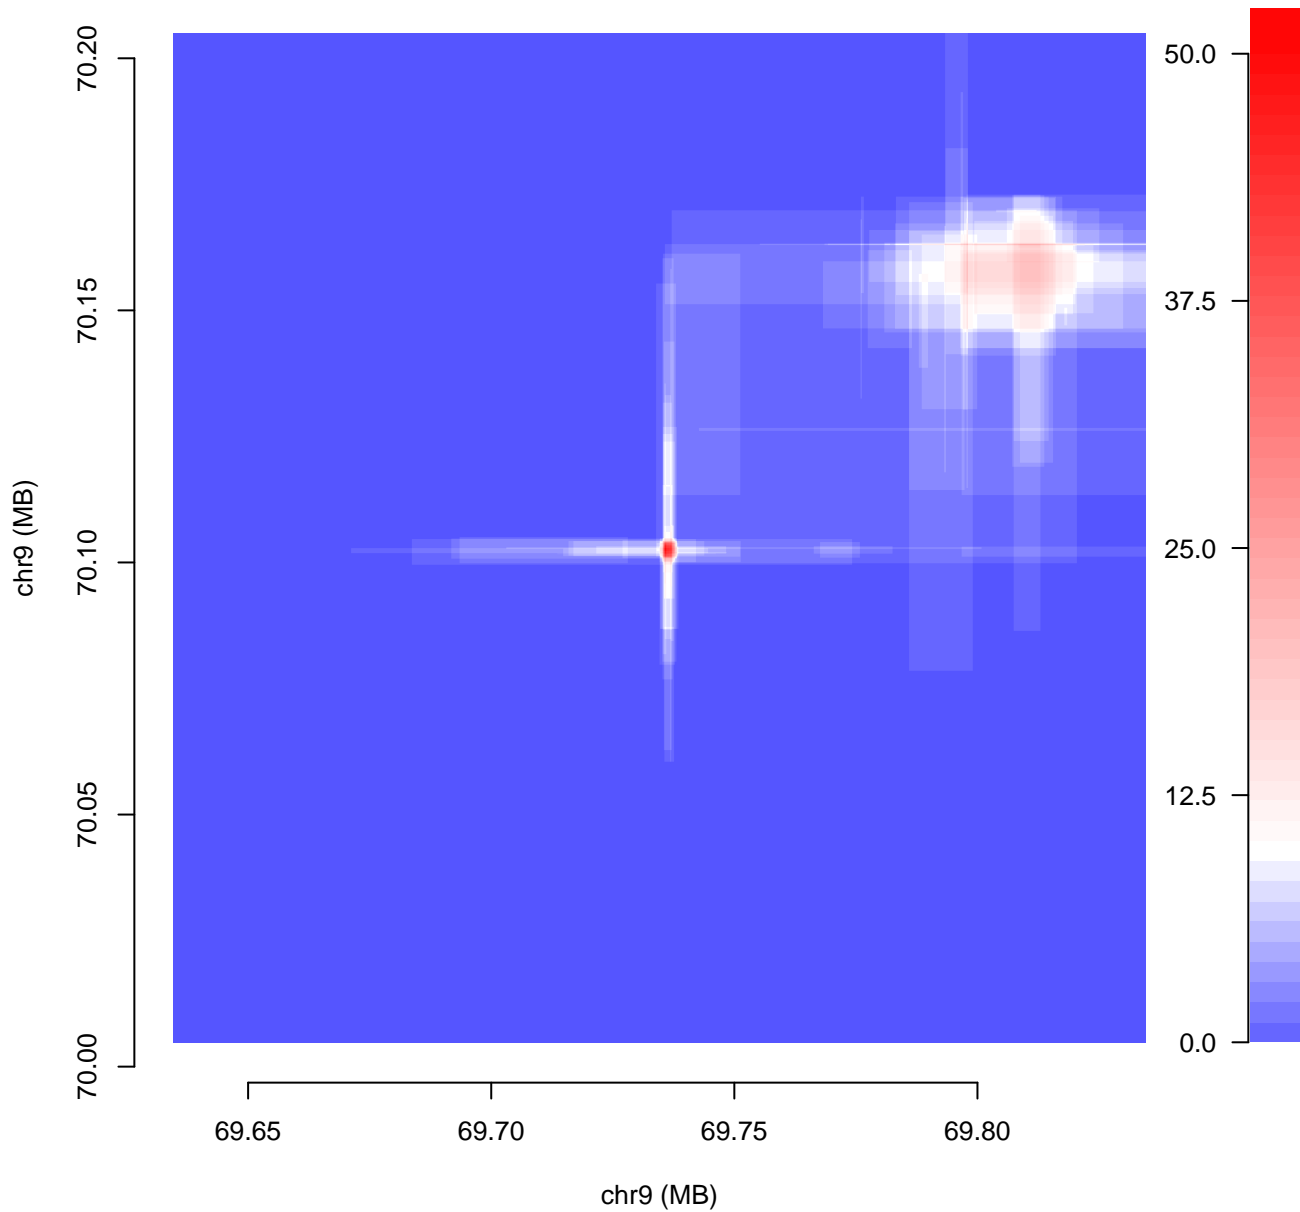

Supplement: Supplemental_Data.zip [file event_116.pdf › event_116.pdf]

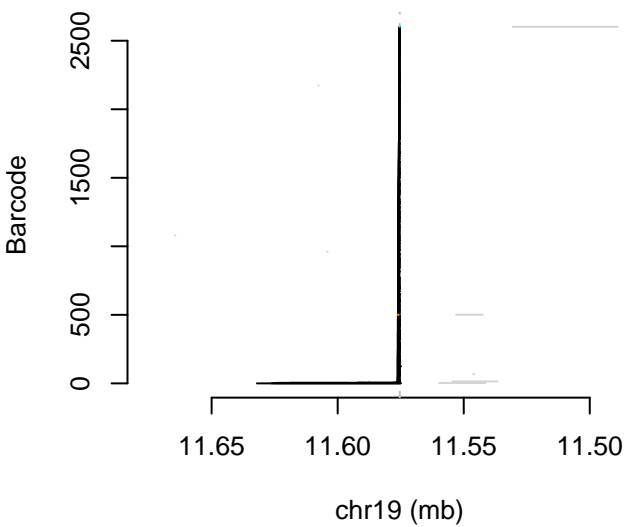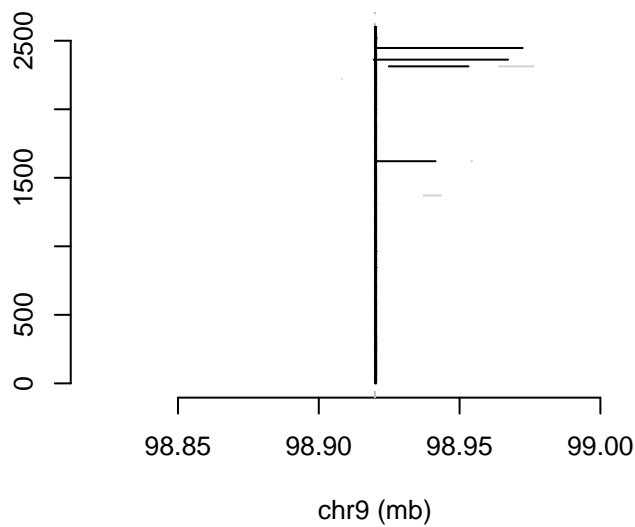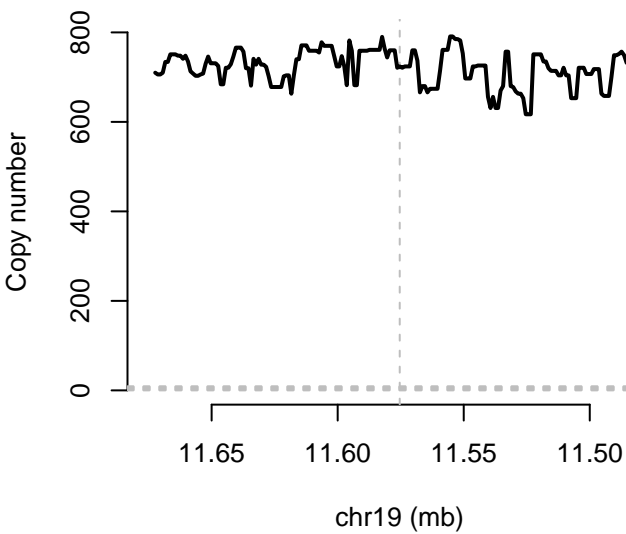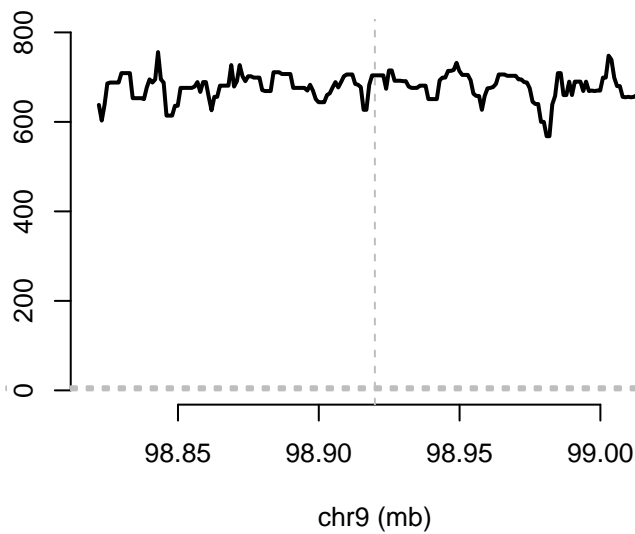

K562 chr19:11,575,380::chr9:98,919,920--

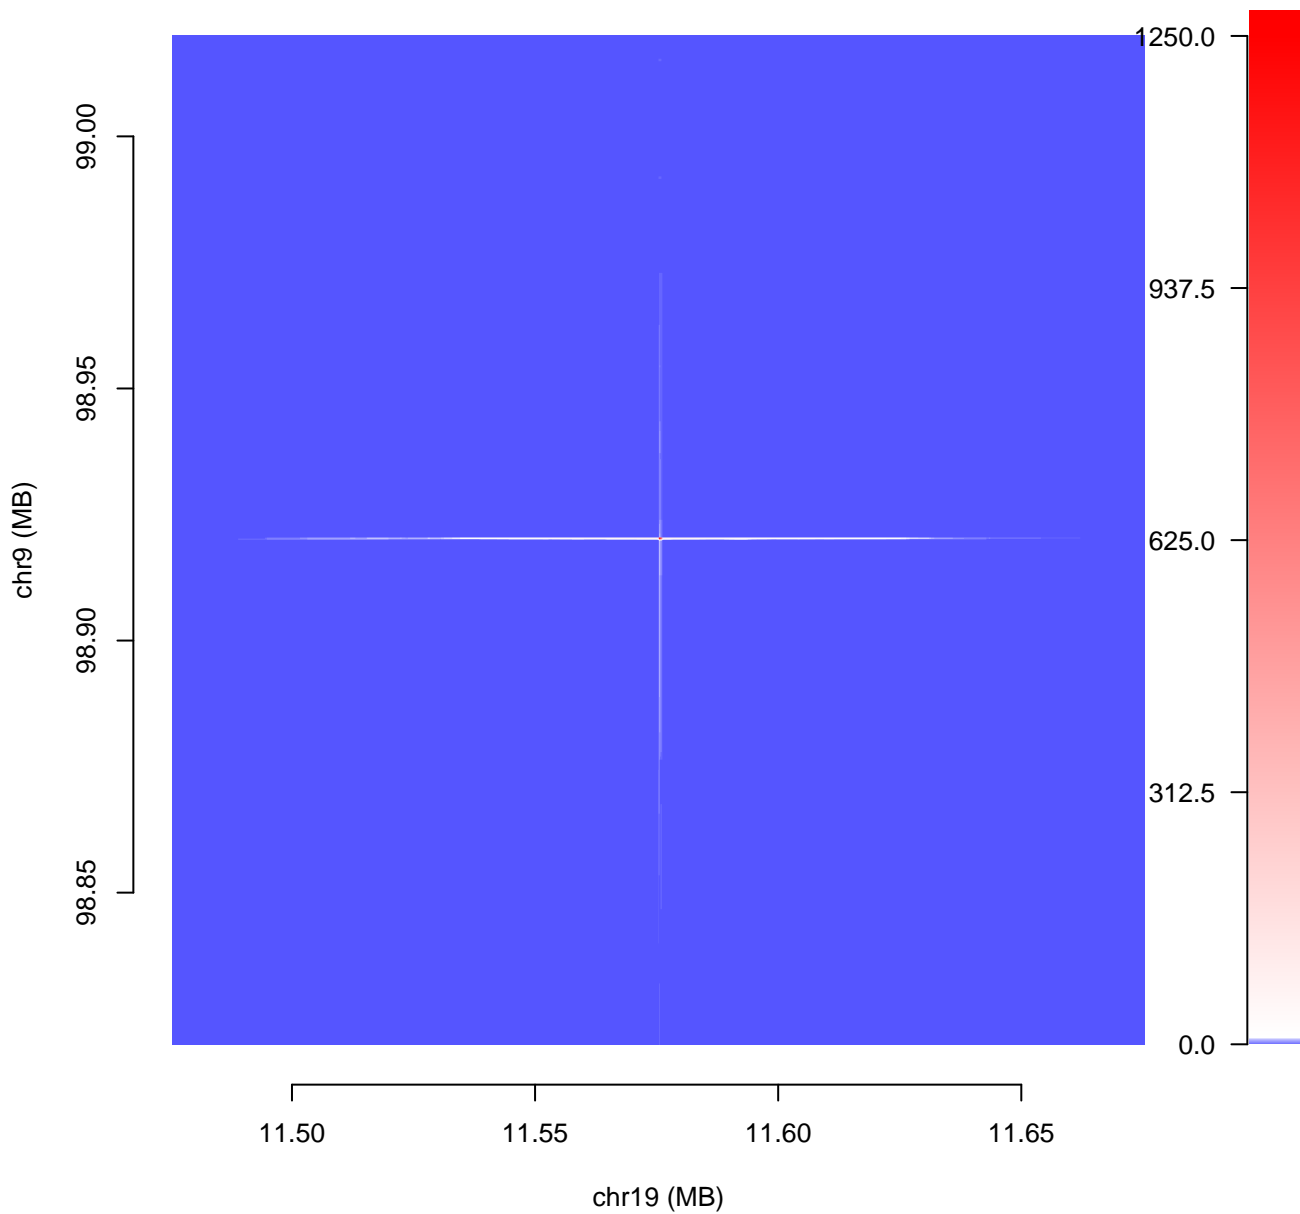

Supplement: Supplemental_Data.zip [file event_117.pdf › event_117.pdf]

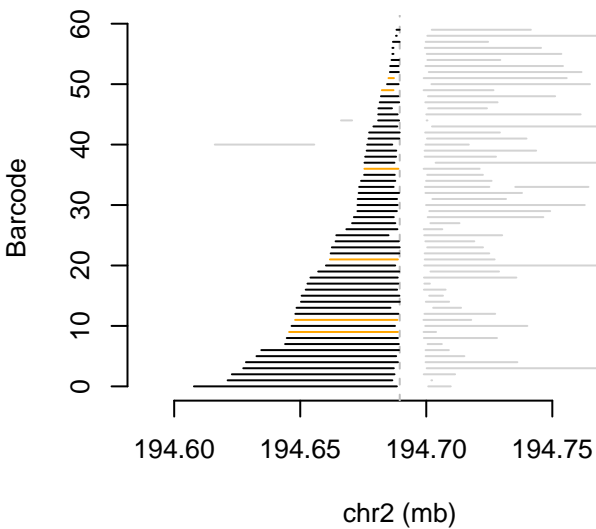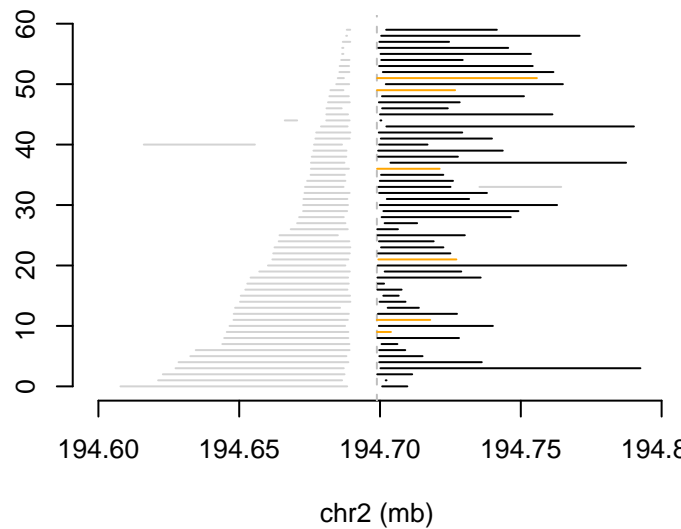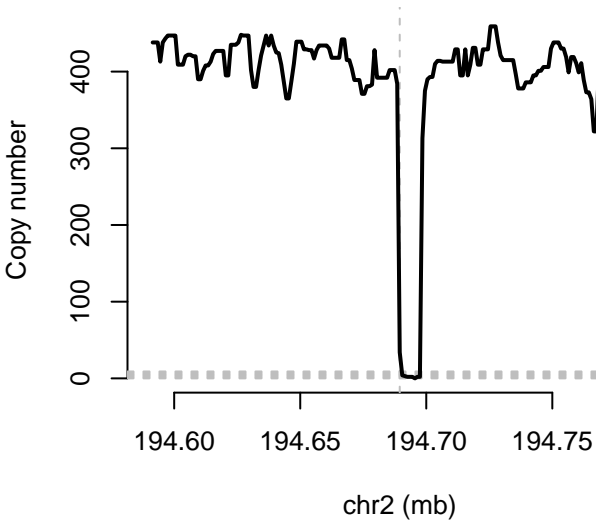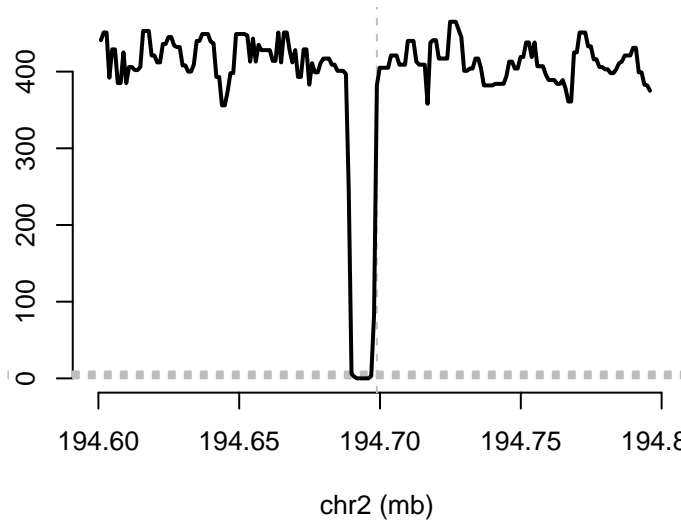

K562 chr2:194,689,475::chr2:194,698,883+-

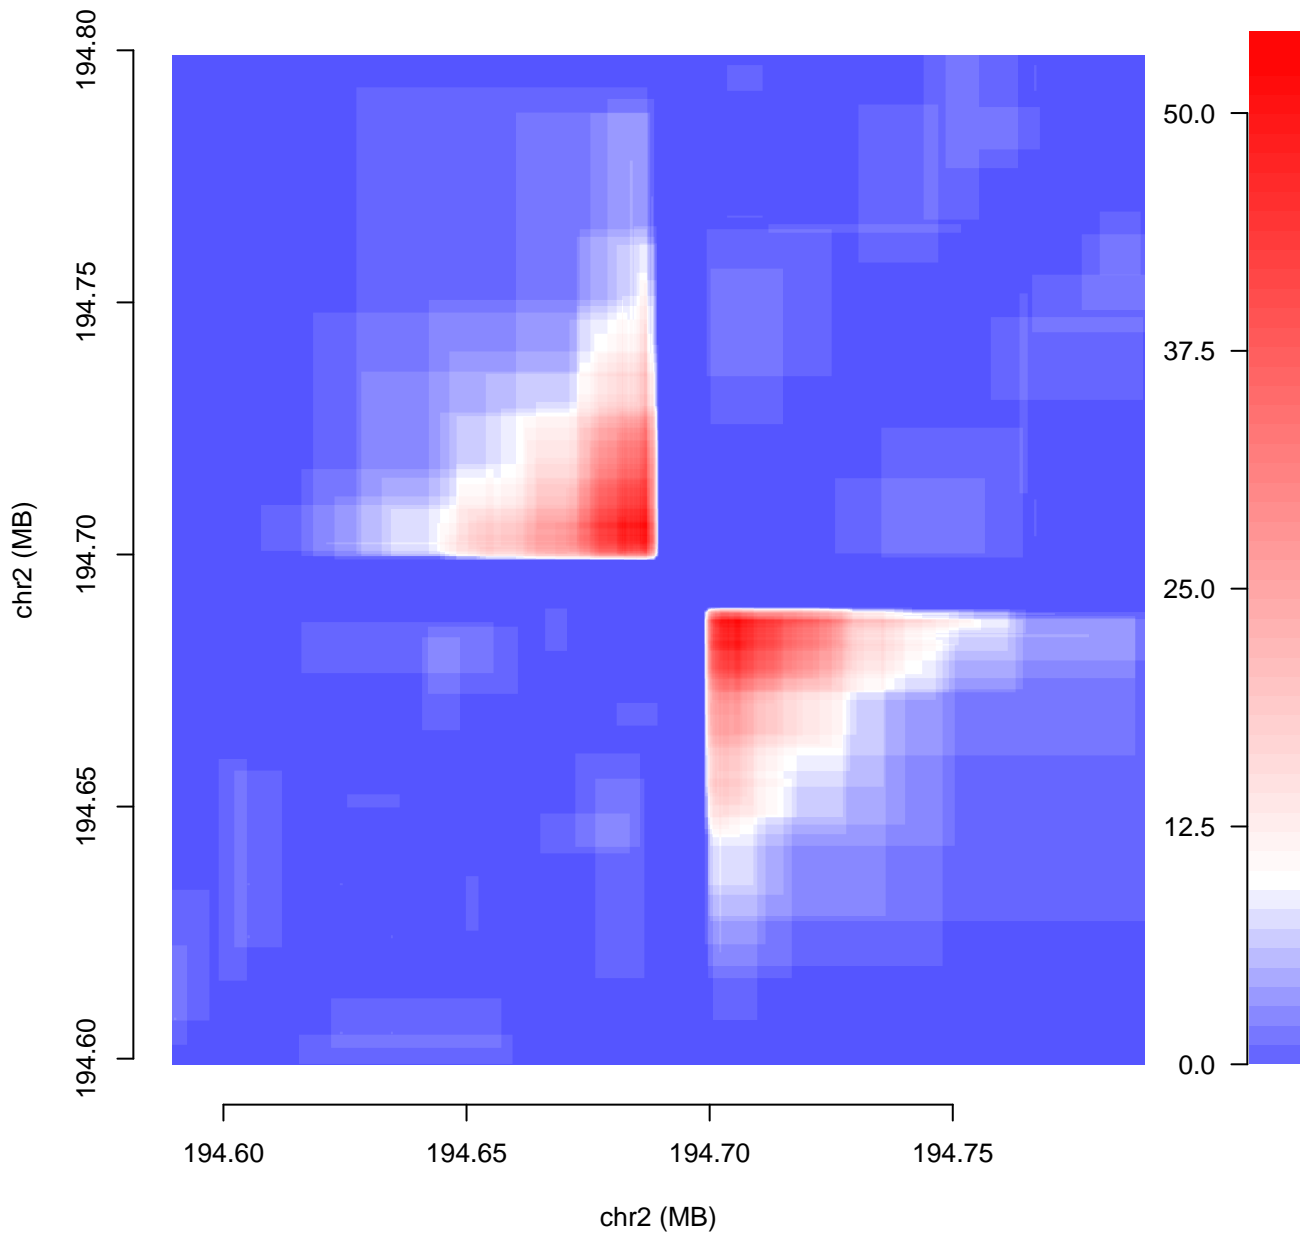

Supplement: Supplemental_Data.zip [file event_118.pdf › event_118.pdf]

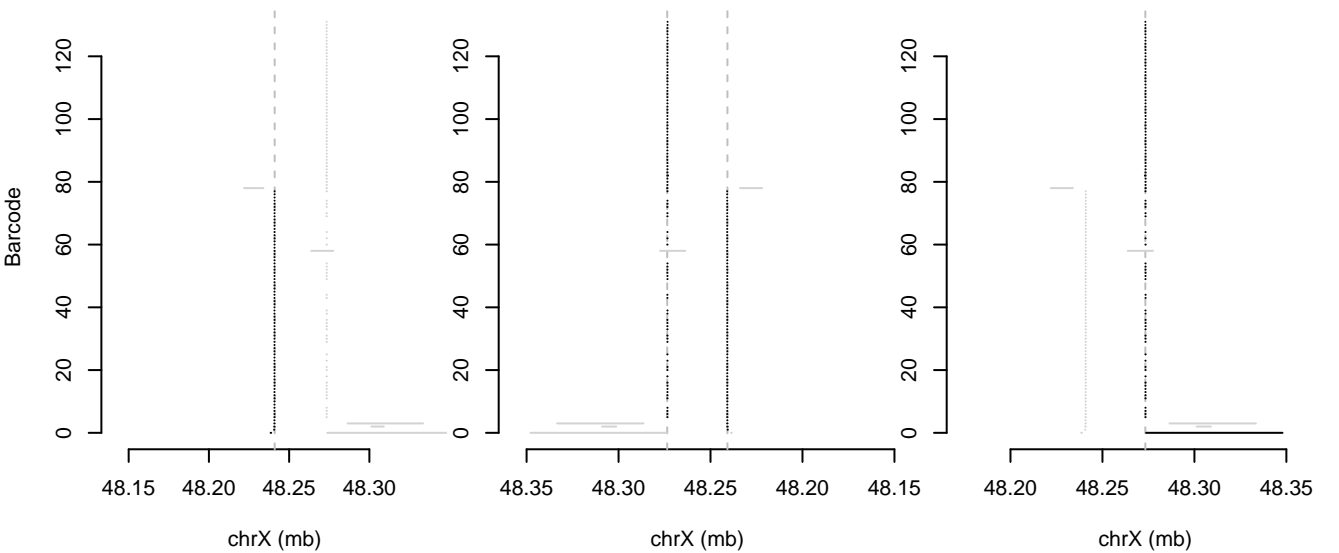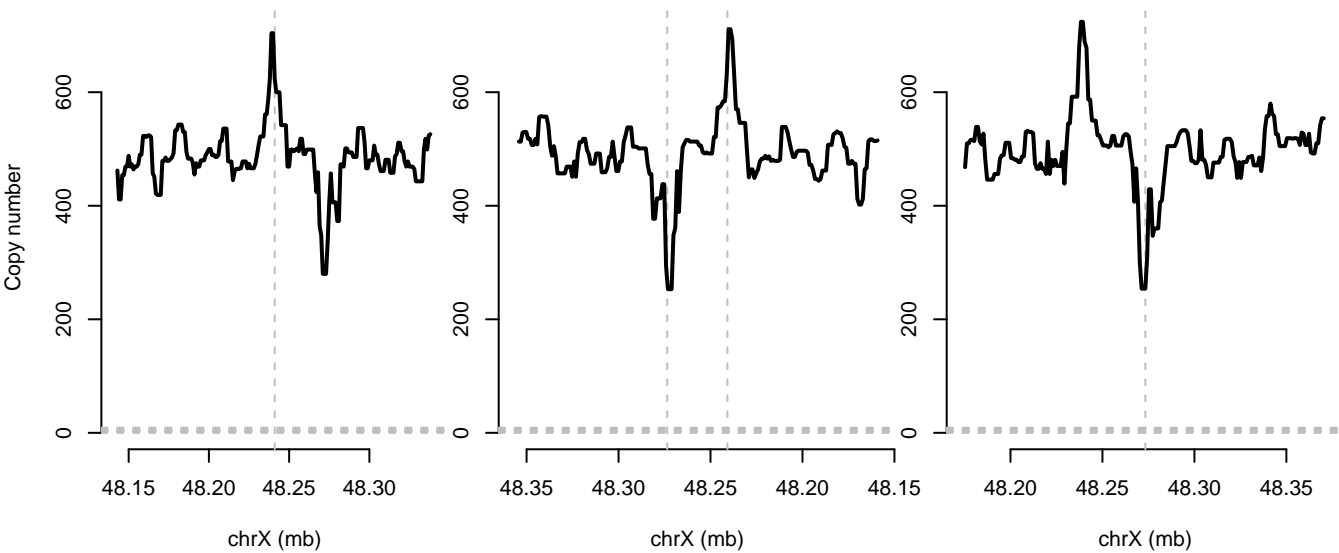

K562 chrX:48,240,794::chrX:48,273,322--

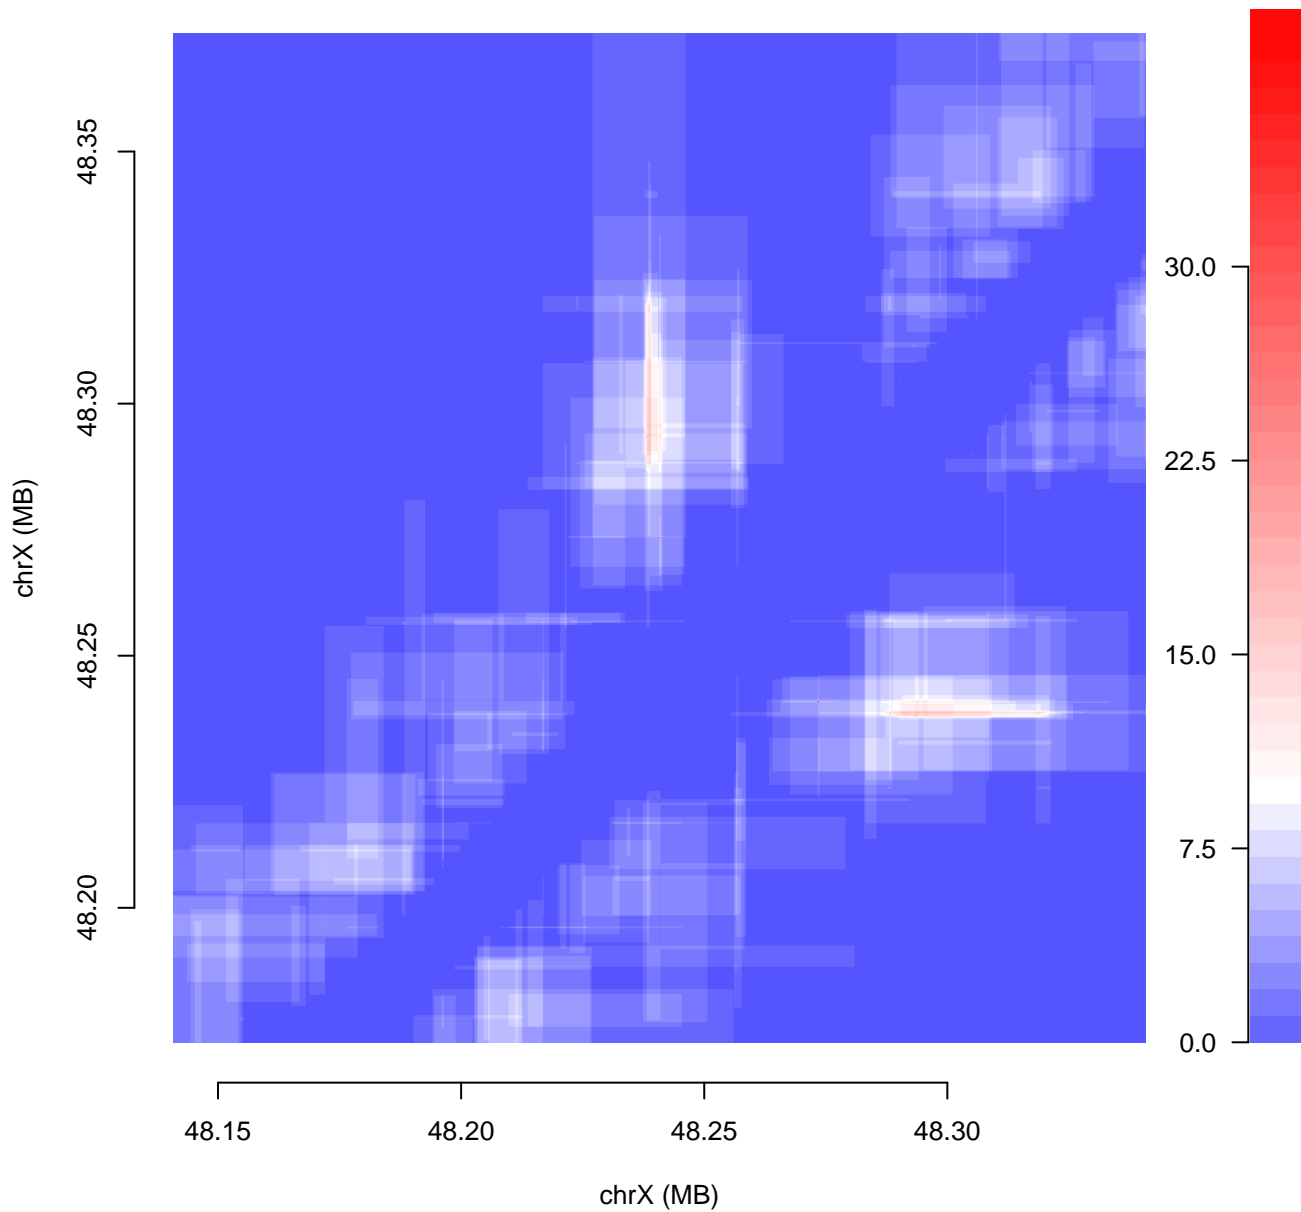

K562 chrX:48,240,794::chrX:48,273,531-+

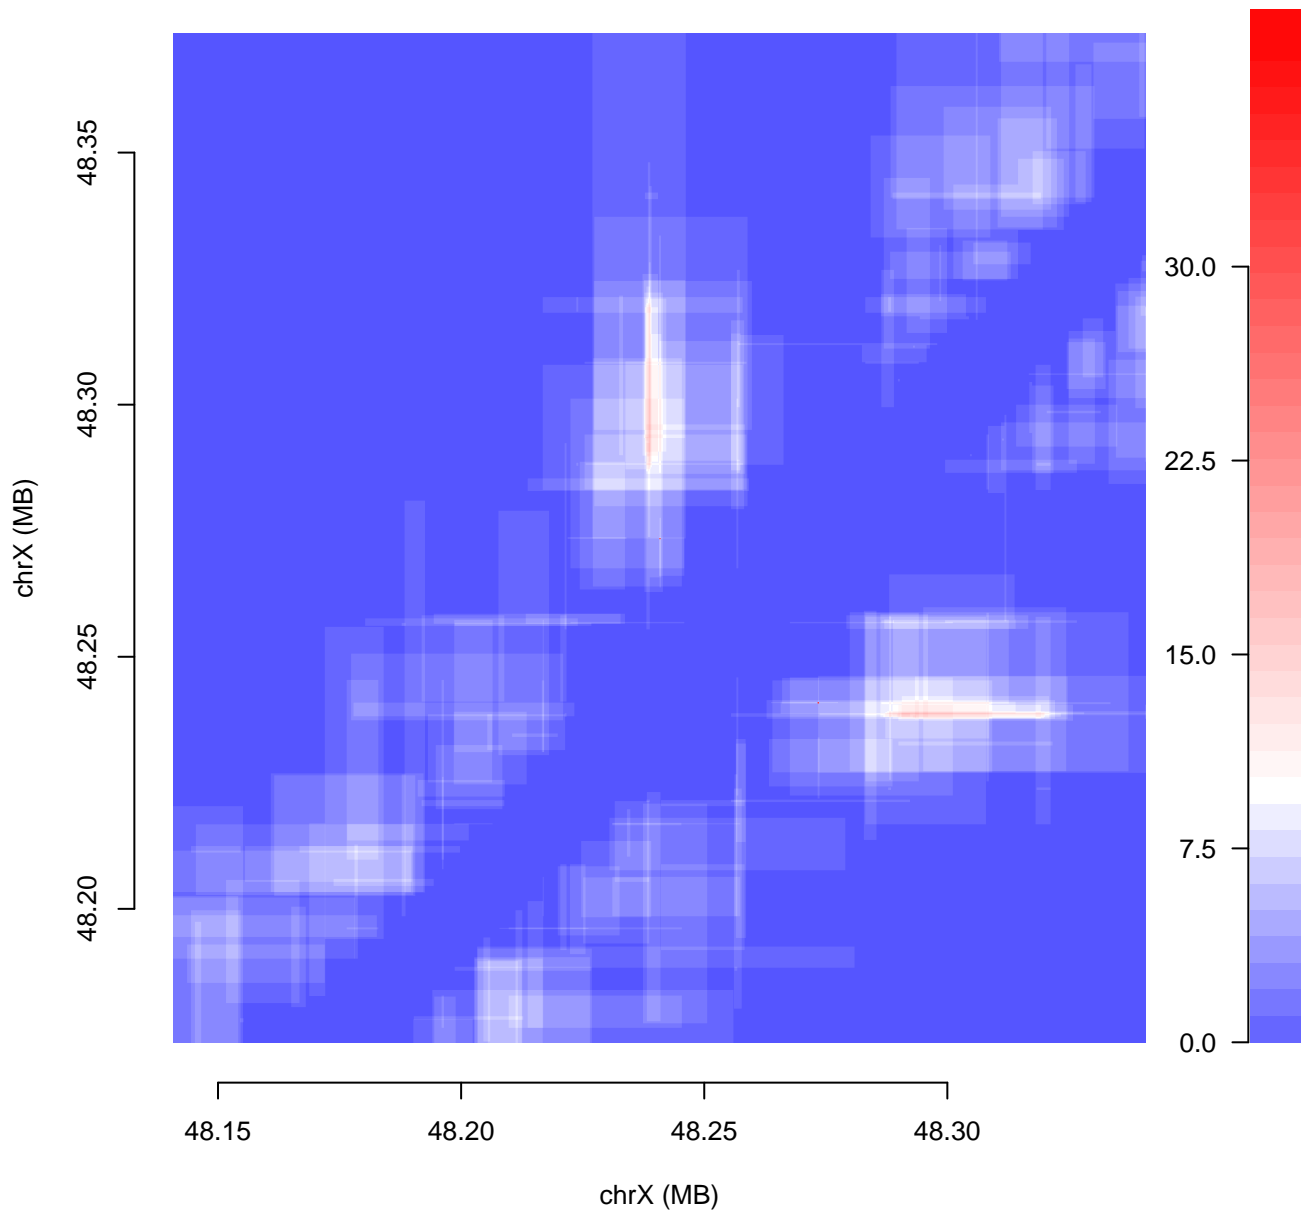

K562 chrX:48,240,990::chrX:48,273,531++

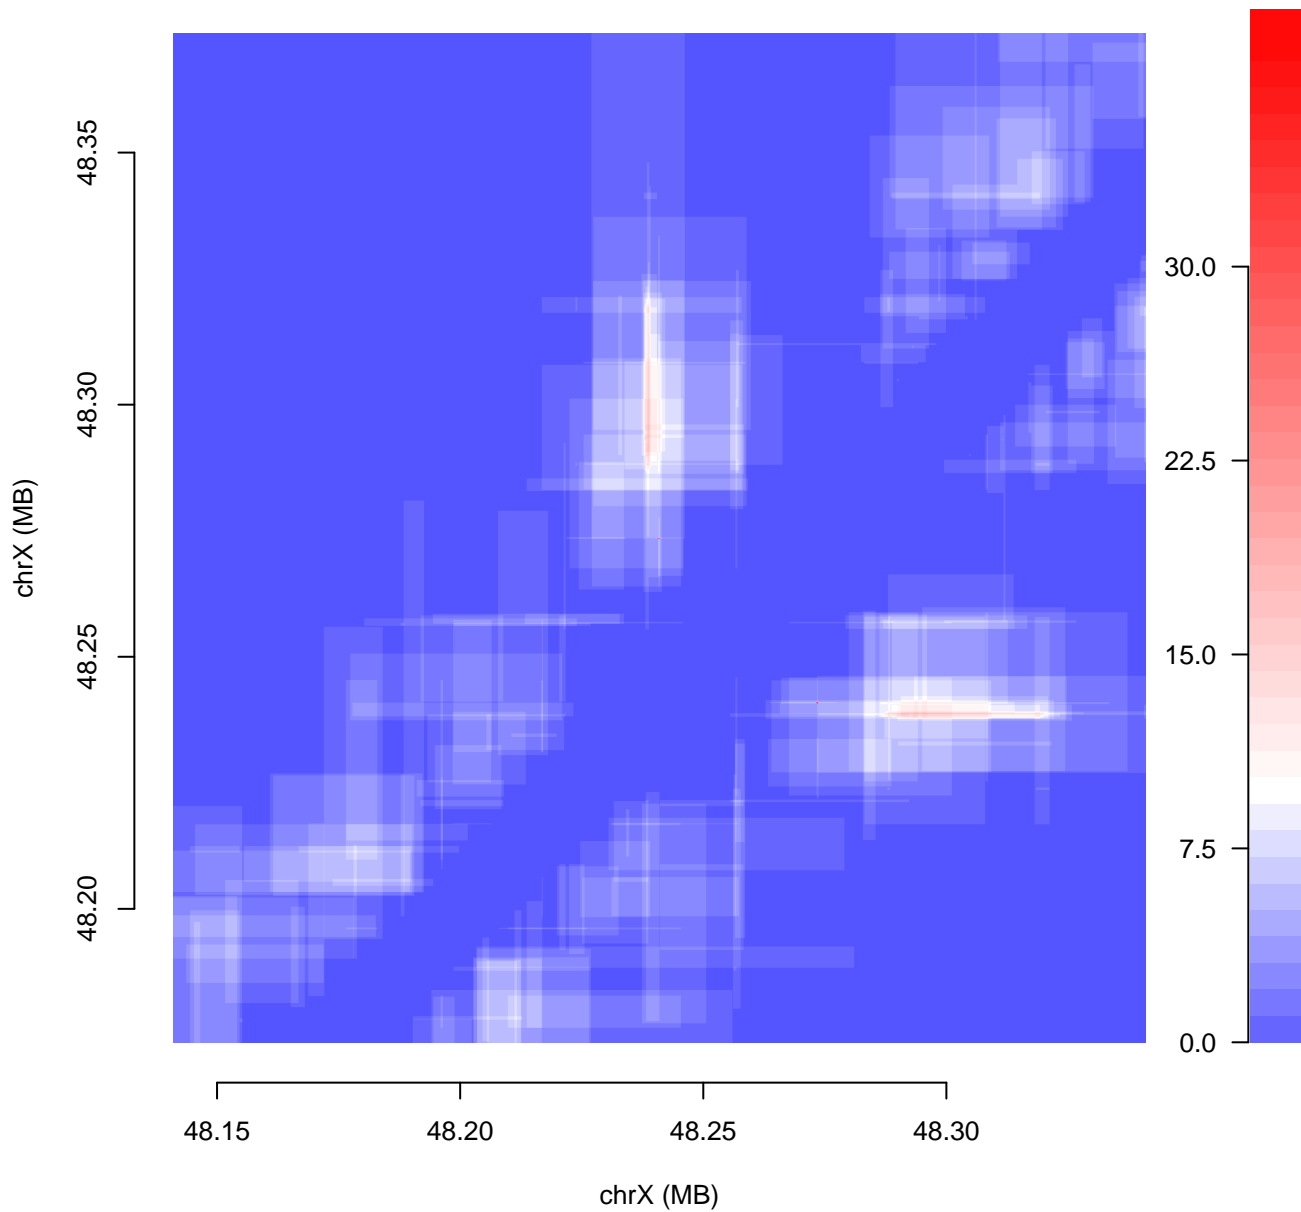

Supplement: Supplemental_Data.zip [file event_119.pdf › event_119.pdf]

Barcode

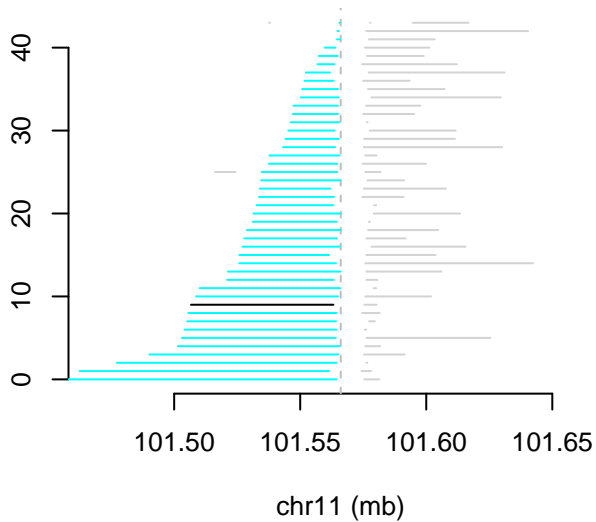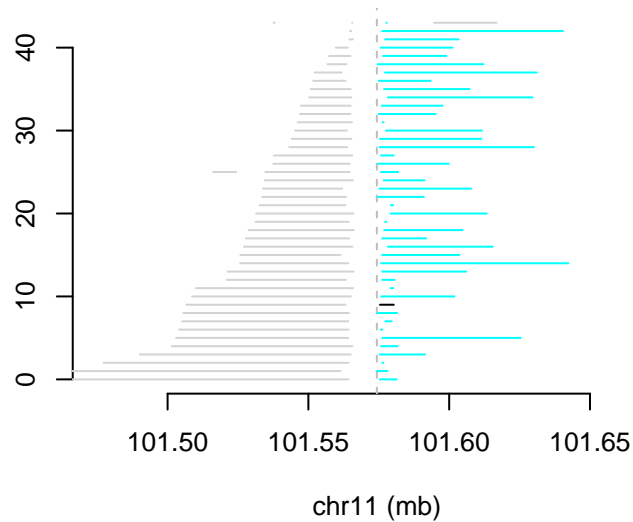

Copy number

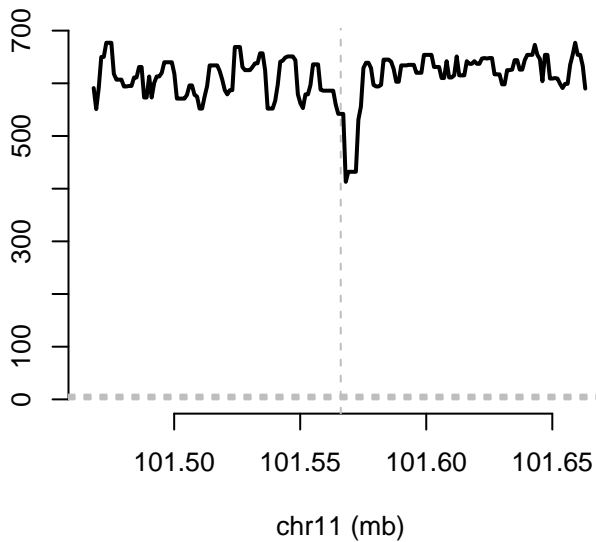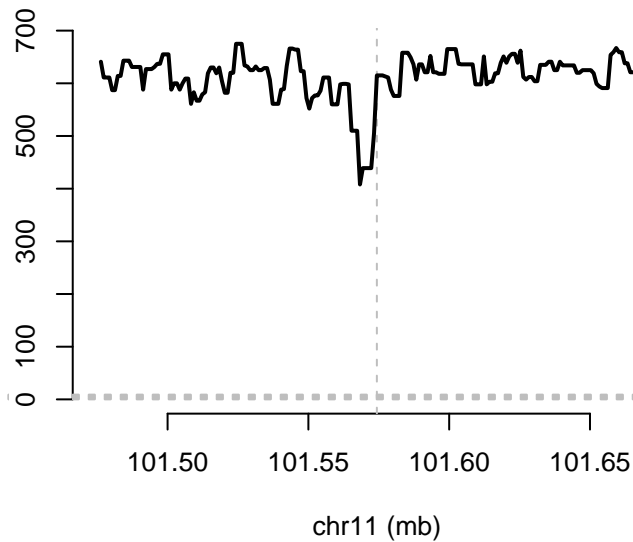

K562 chr11:101,574,322::chr11:101,566,081-+

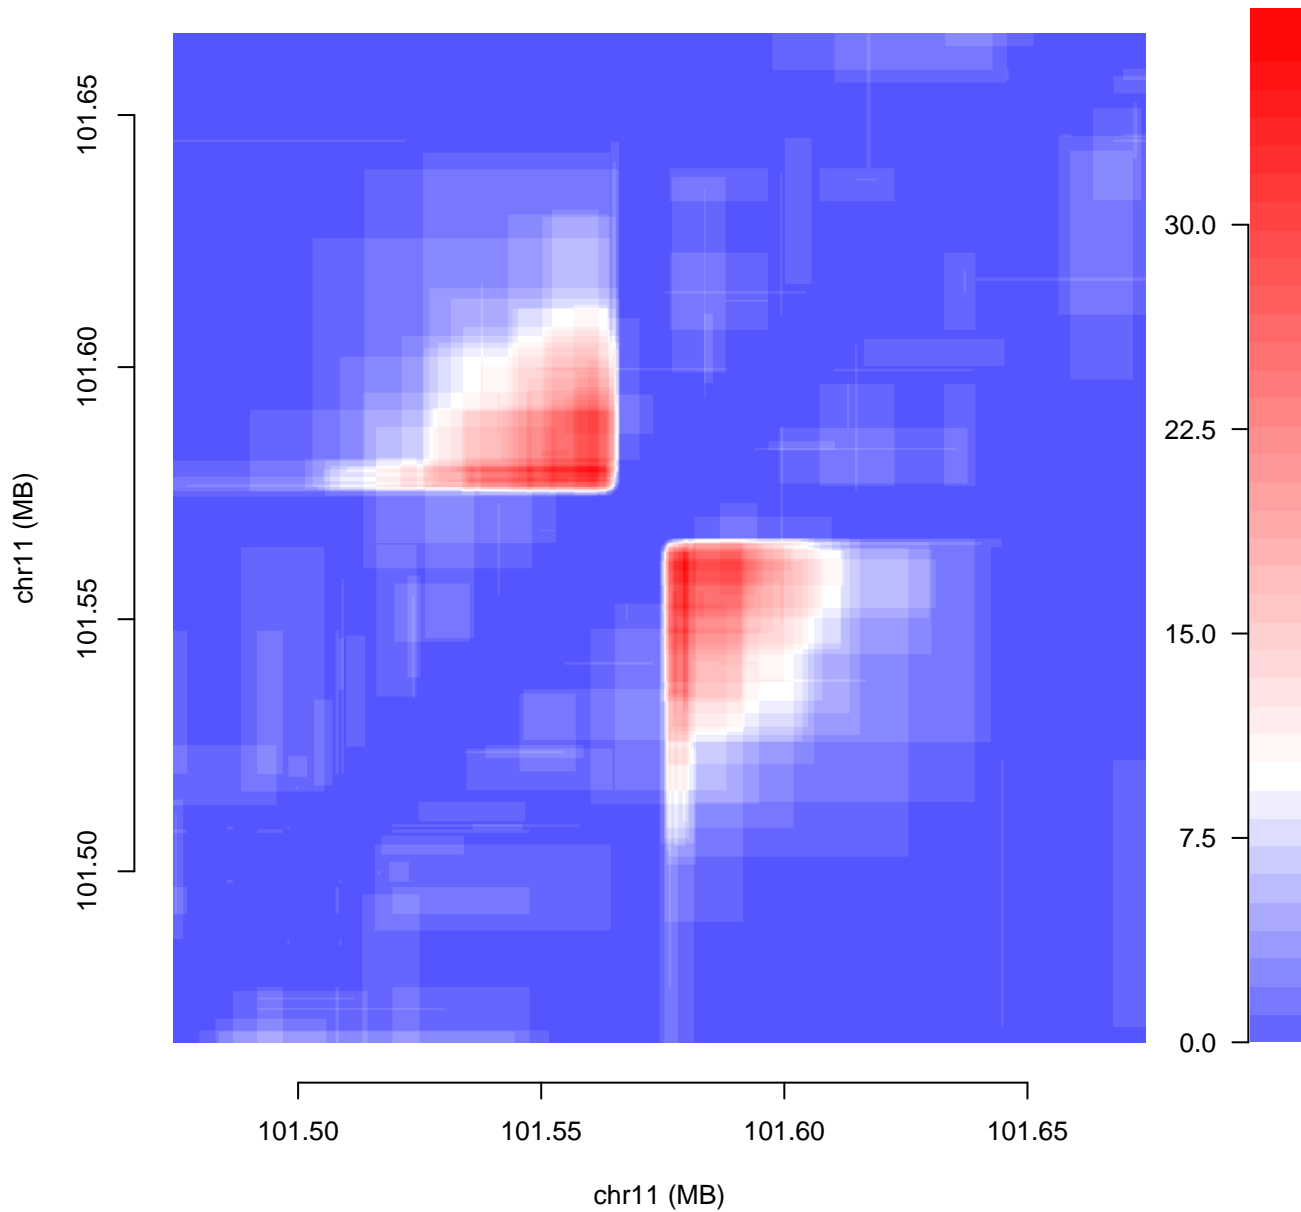

Supplement: Supplemental_Data.zip [file event_12.pdf › event_12.pdf]

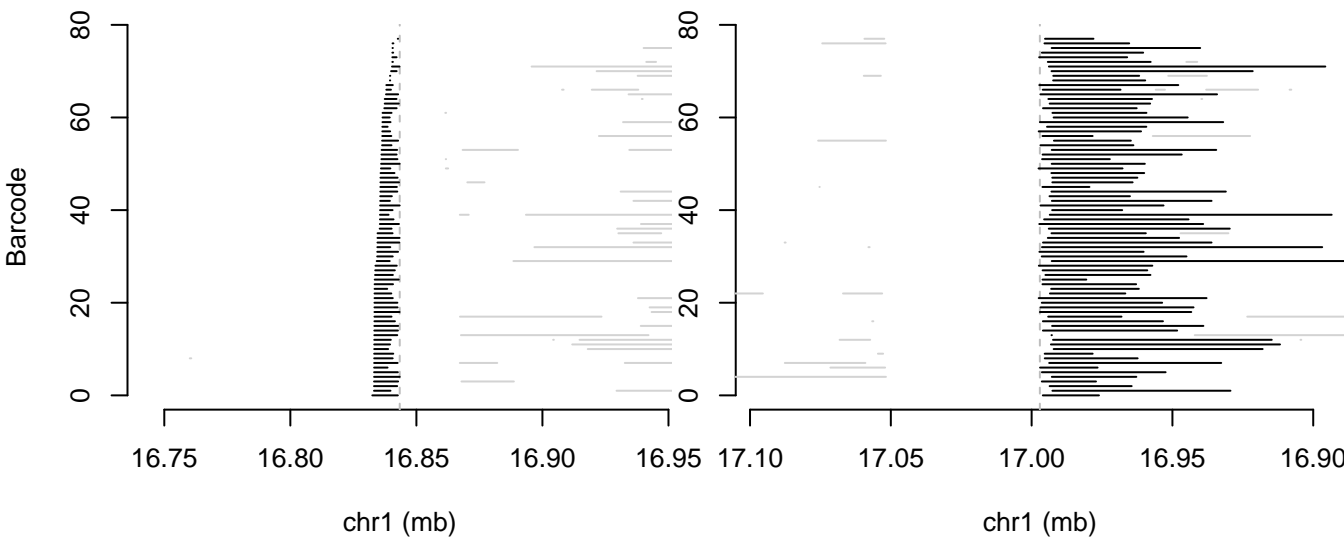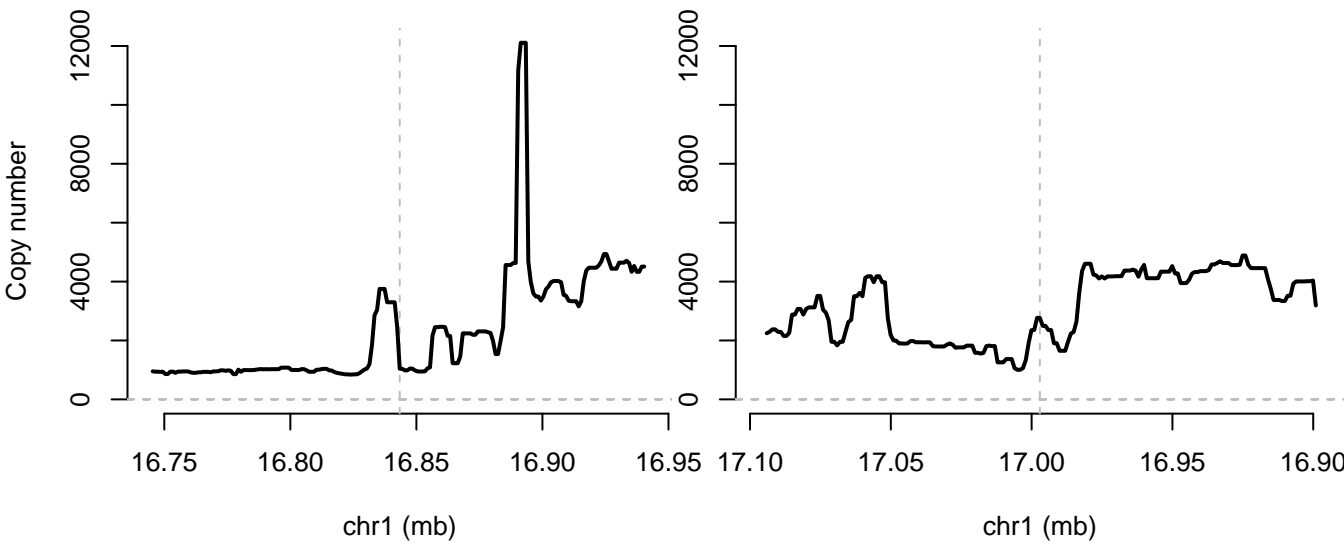

K562 chr1:16,843,395::chr1:16,997,076++

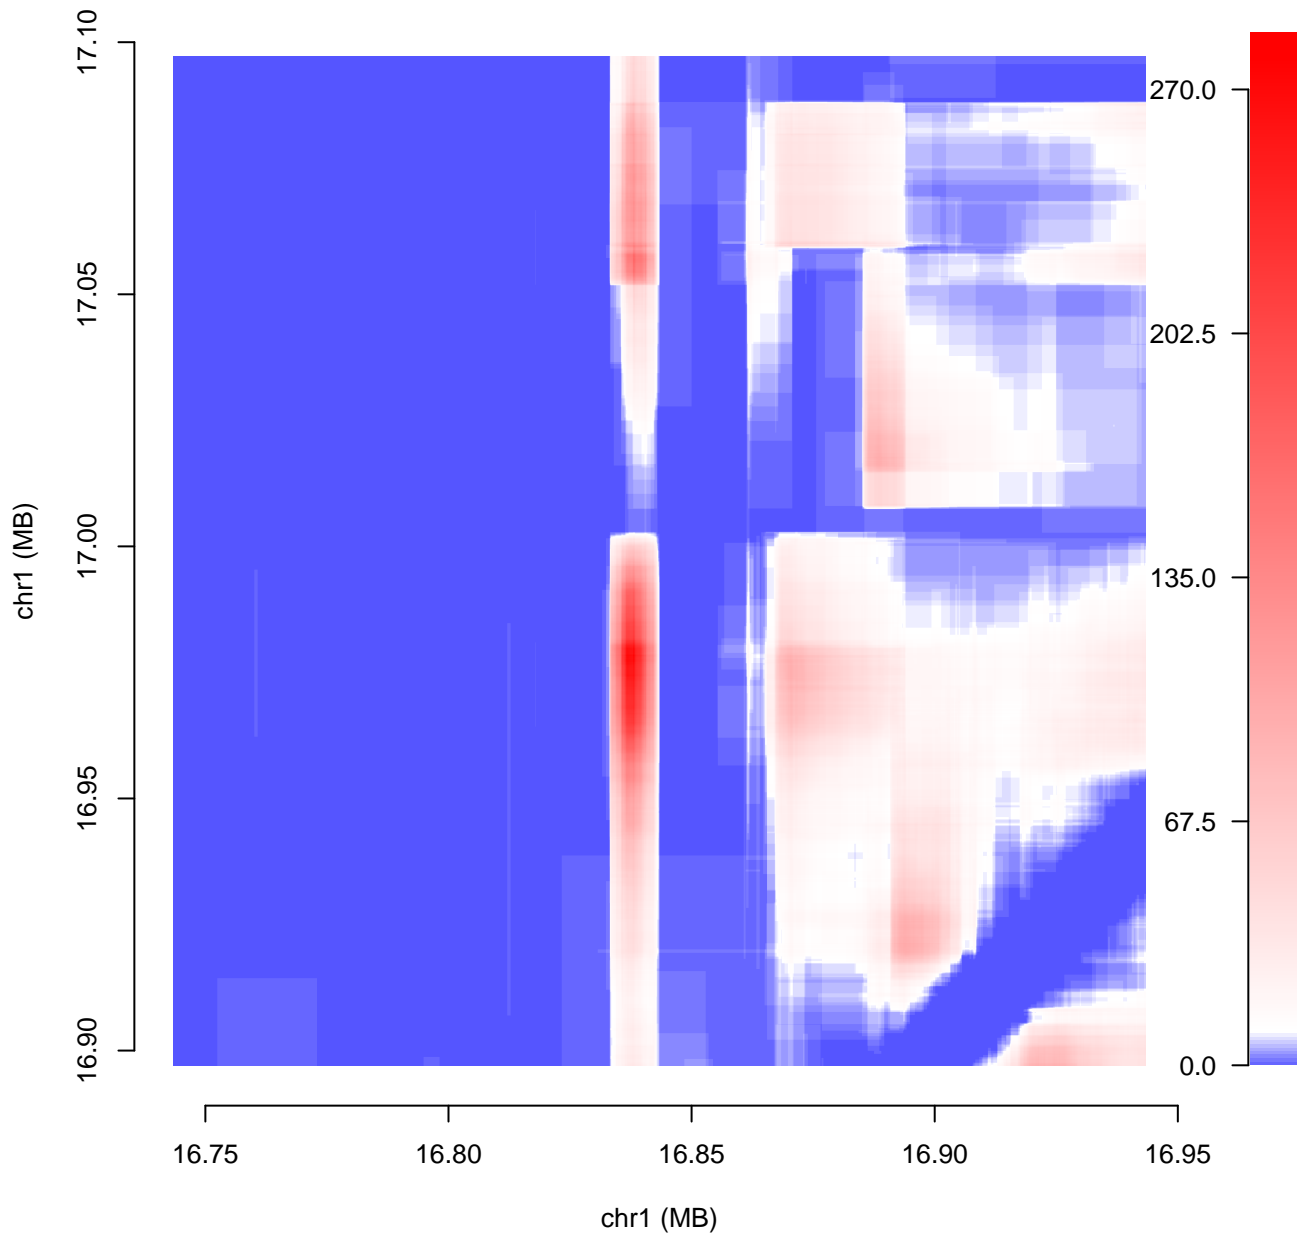

Supplement: Supplemental_Data.zip [file event_120.pdf › event_120.pdf]

Barcode

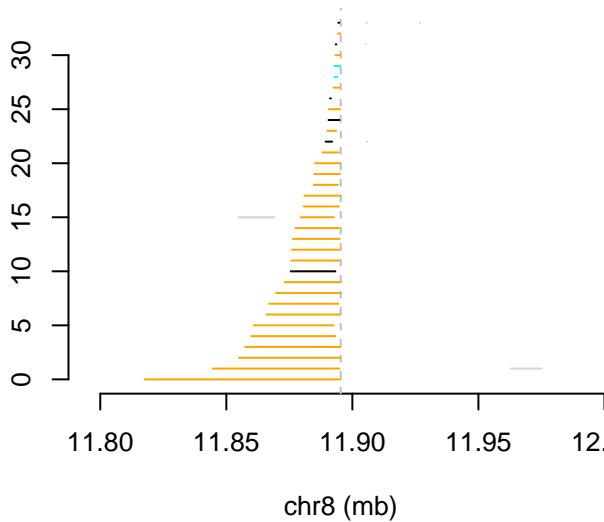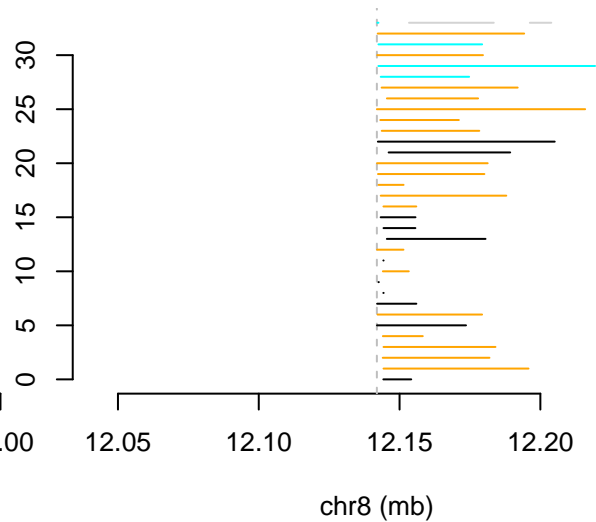

Copy number

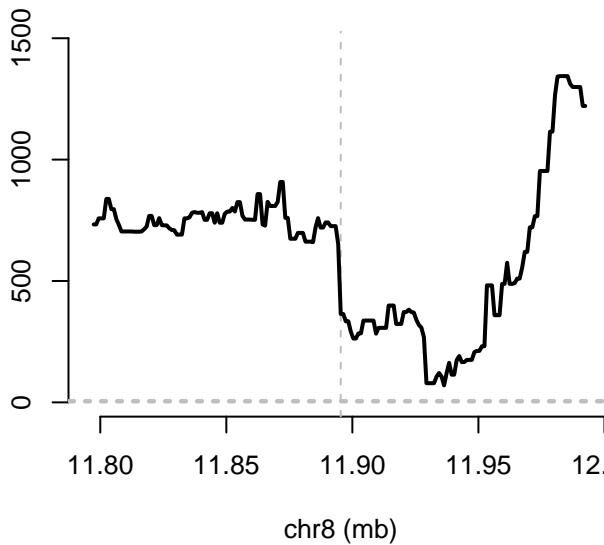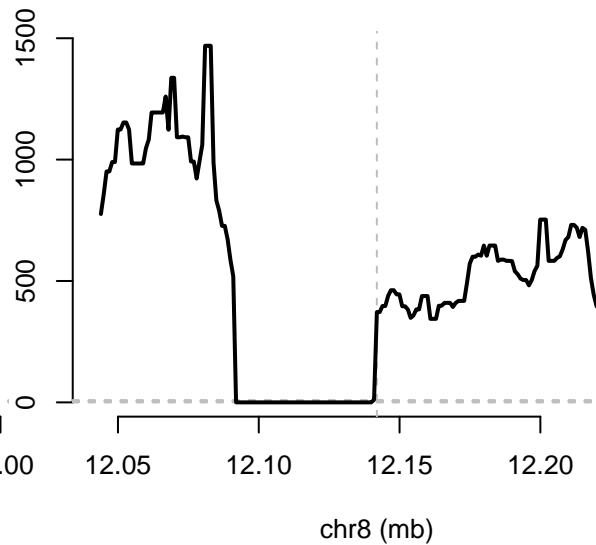

K562 chr8:11,895,388::chr8:12,141,941+-

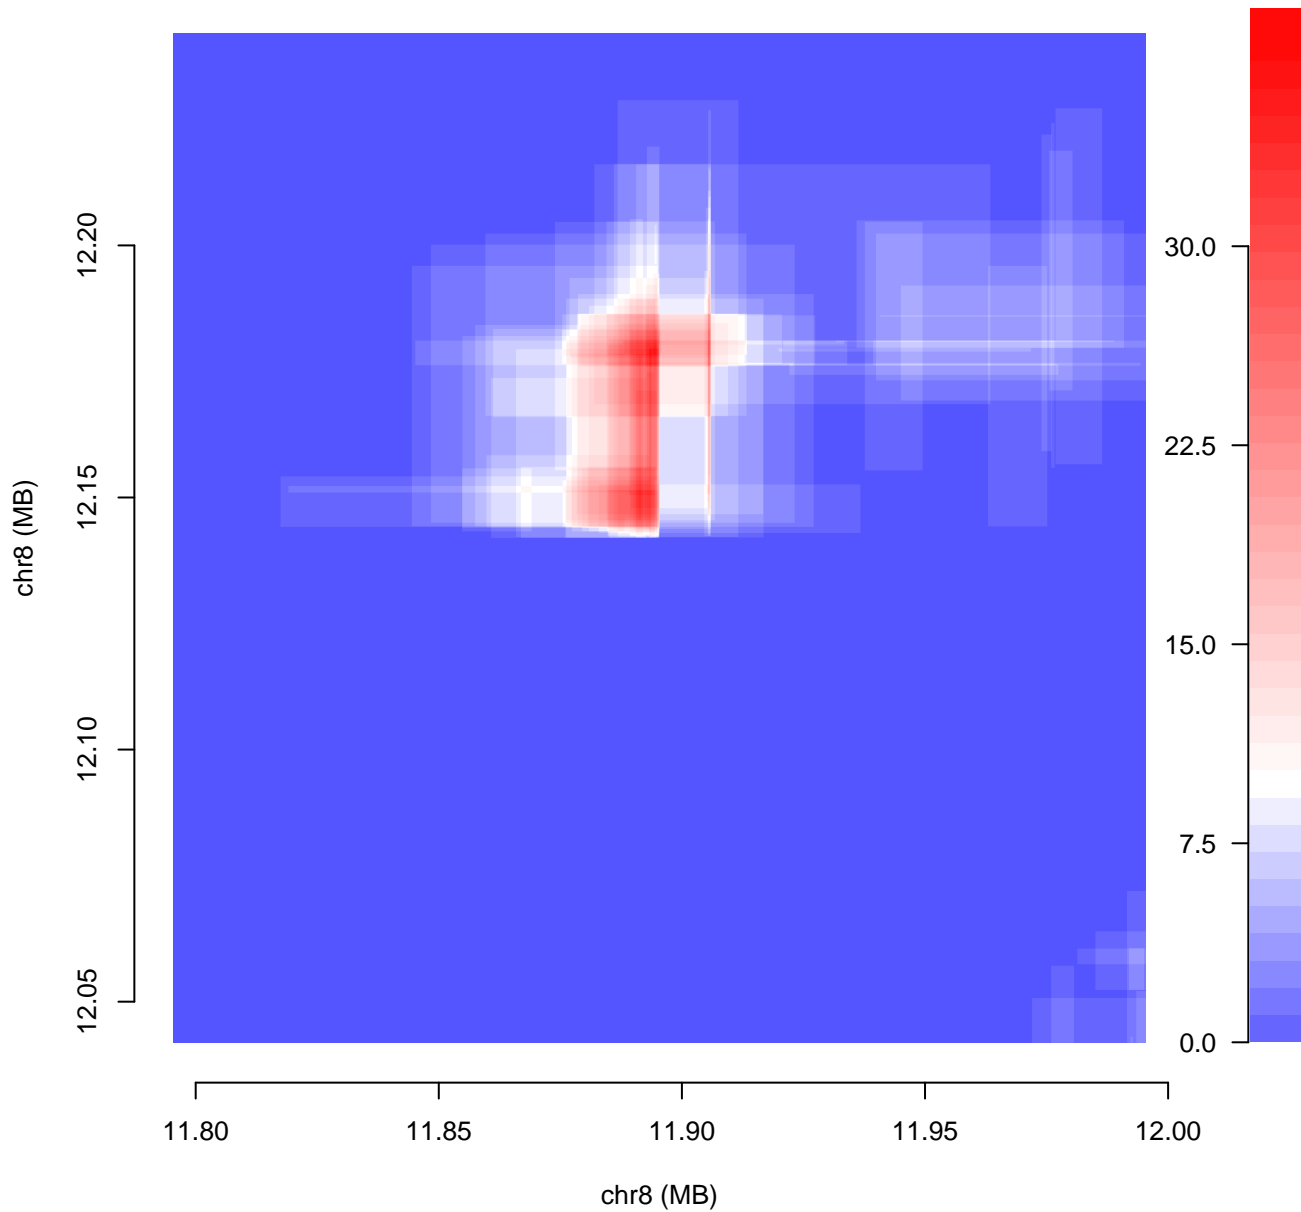

Supplement: Supplemental_Data.zip [file event_121.pdf › event_121.pdf]

Barcode

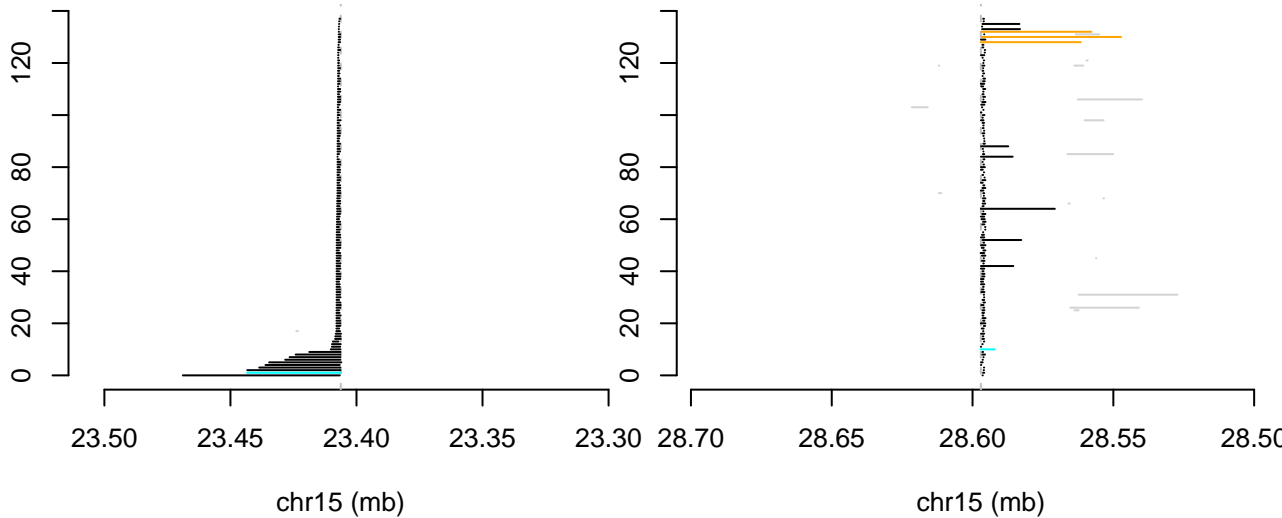

Copy number

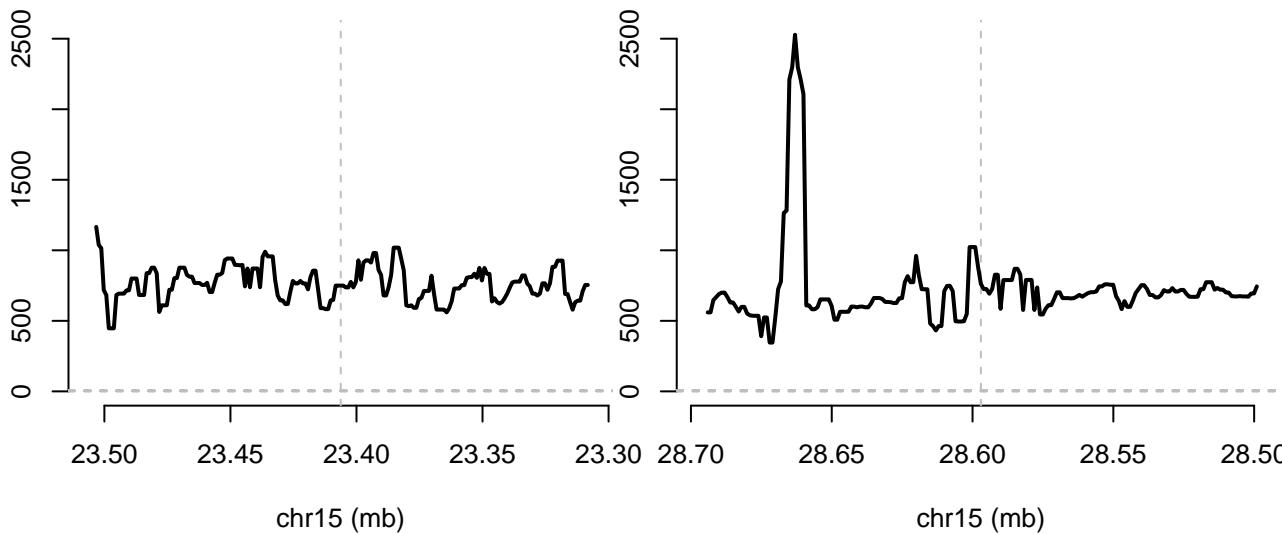

K562 chr15:28,597,046::chr15:23,406,244+-

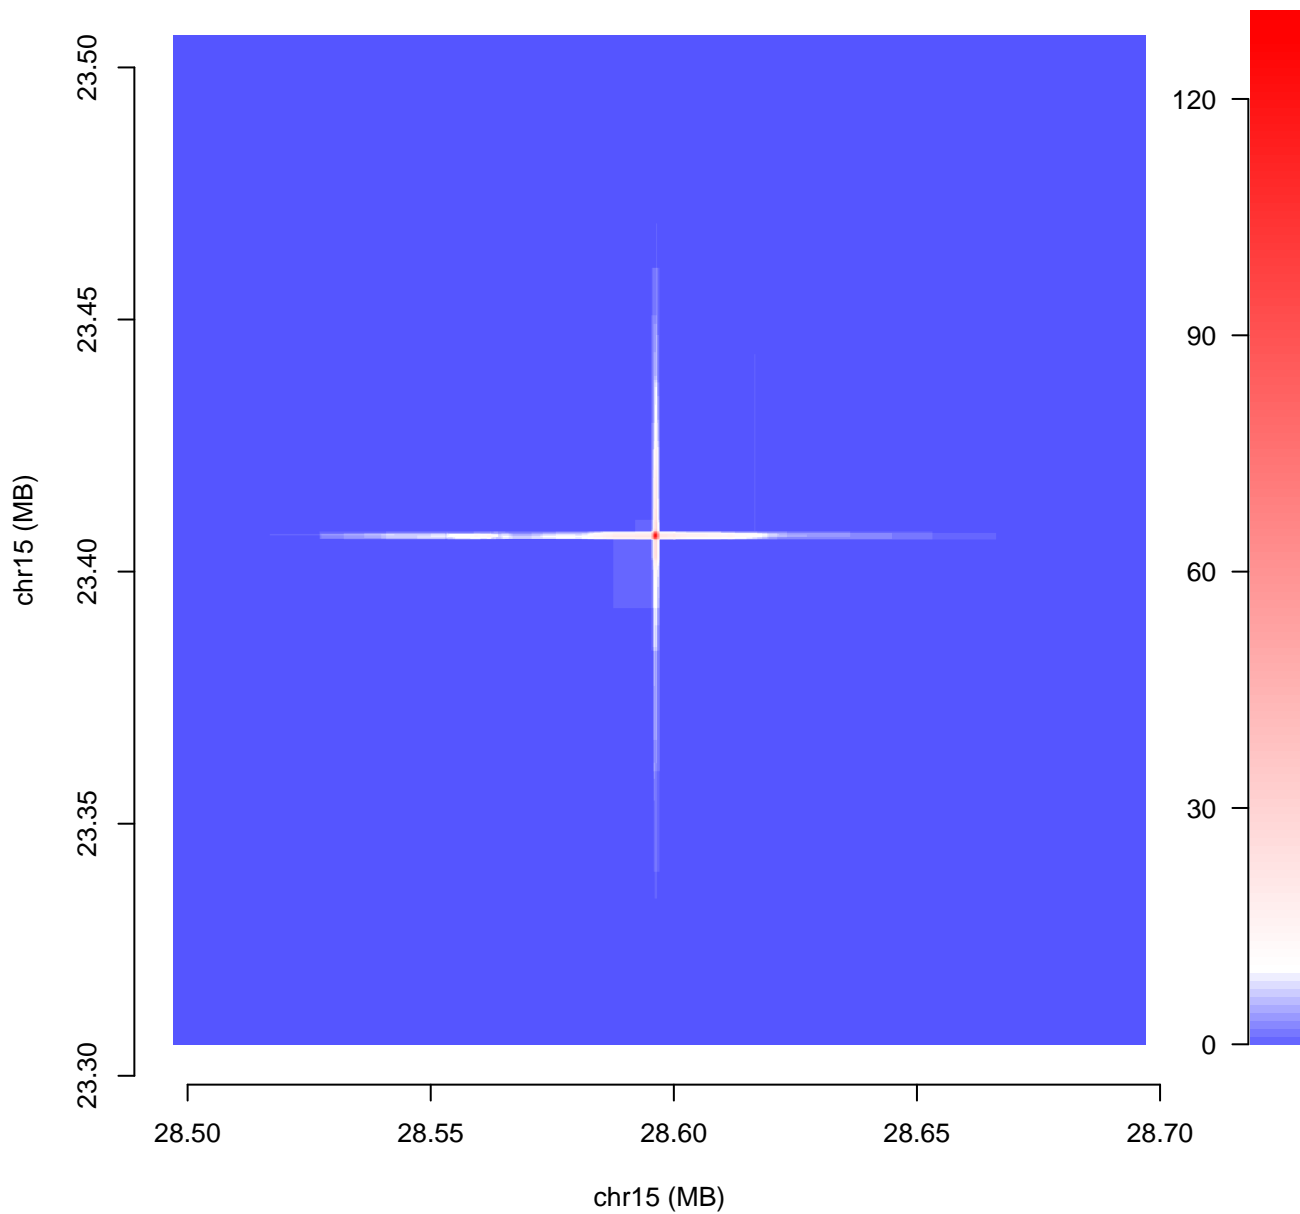

Supplement: Supplemental_Data.zip [file event_122.pdf › event_122.pdf]

Barcode

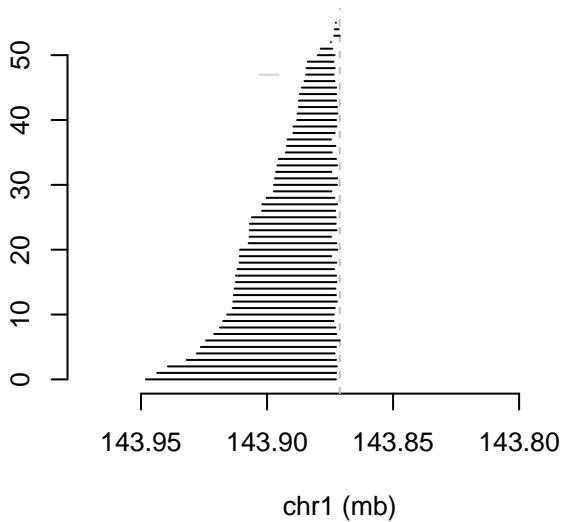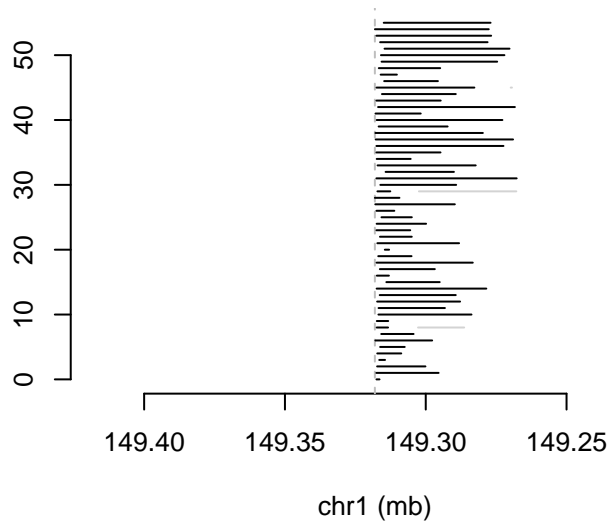

Copy number

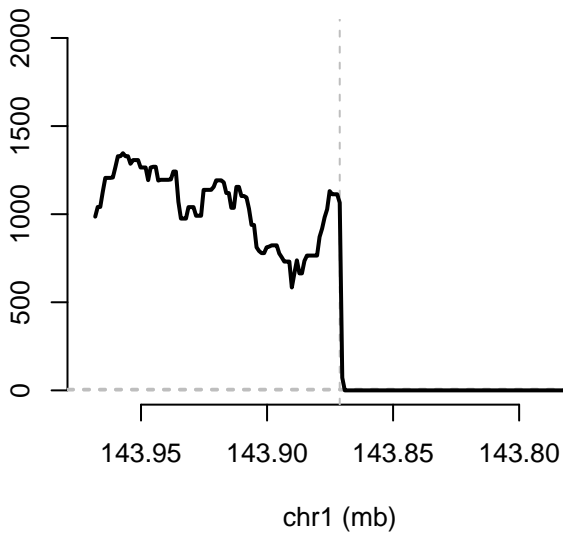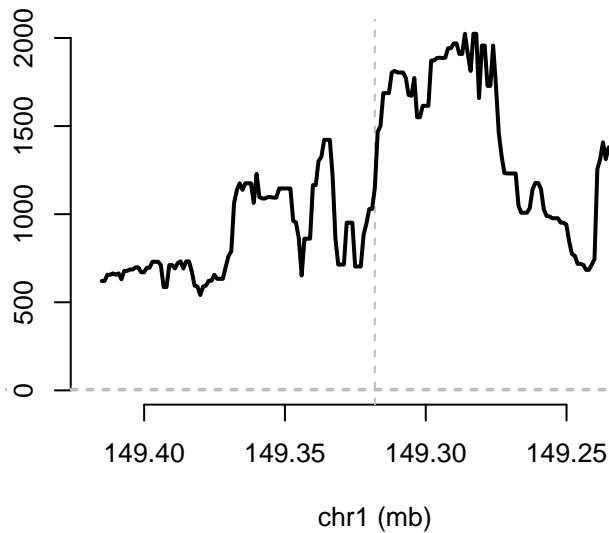

K562 chr1:143,871,167::chr1:149,318,069—+

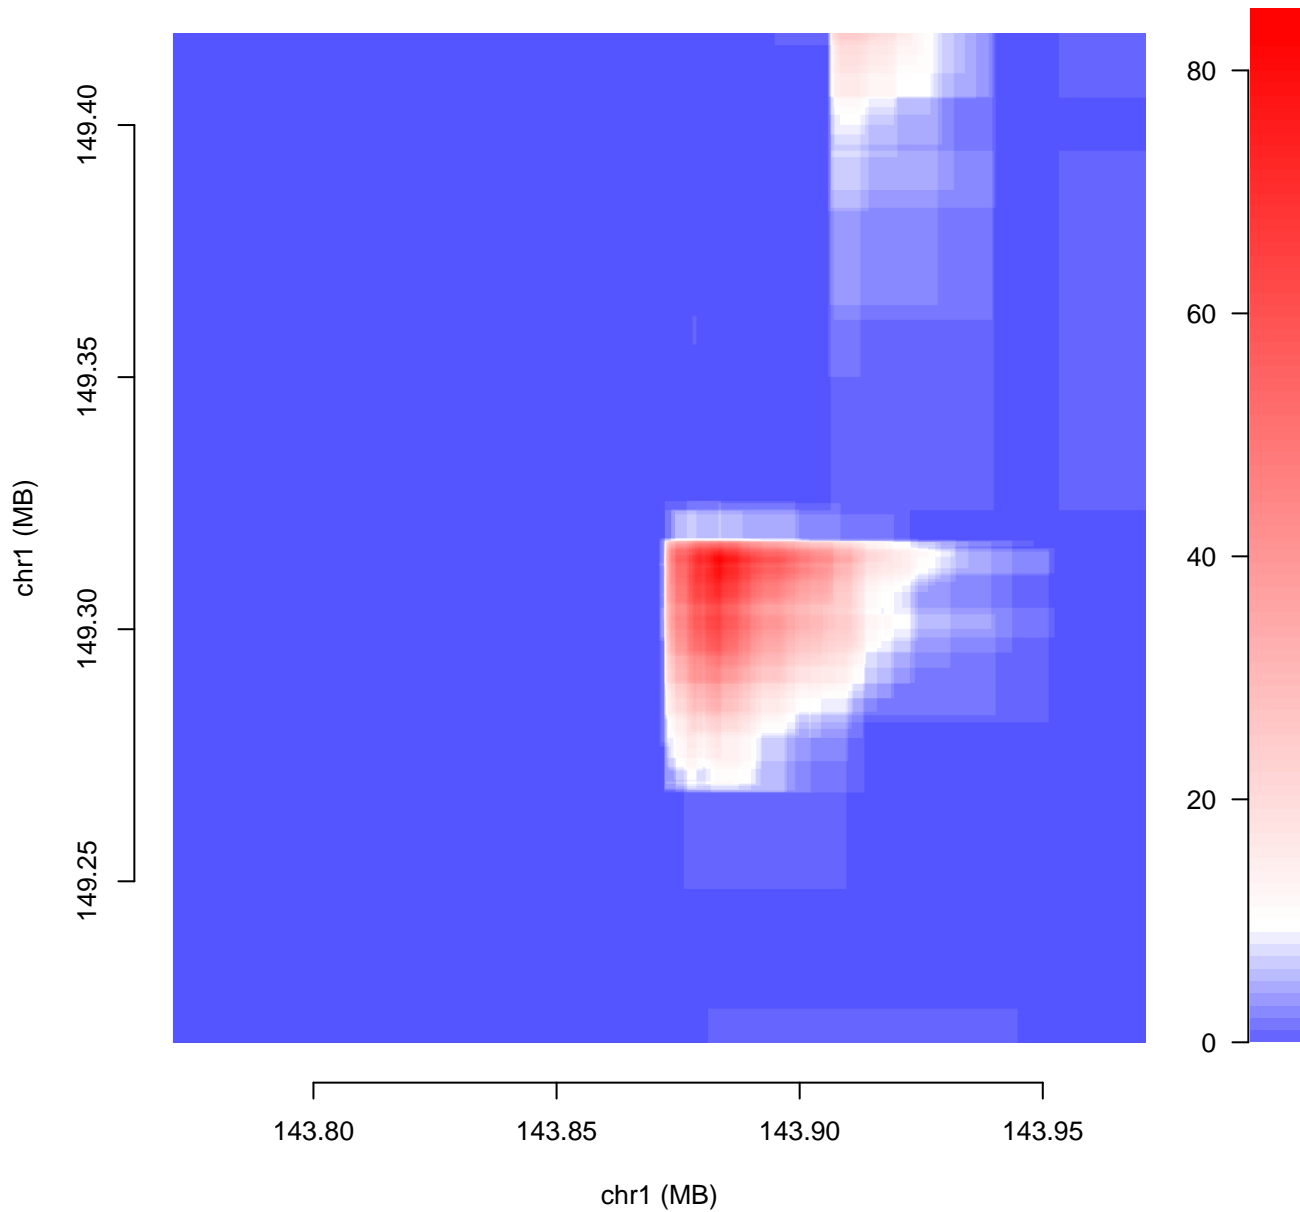

Supplement: Supplemental_Data.zip [file event_123.pdf › event_123.pdf]

Barcode

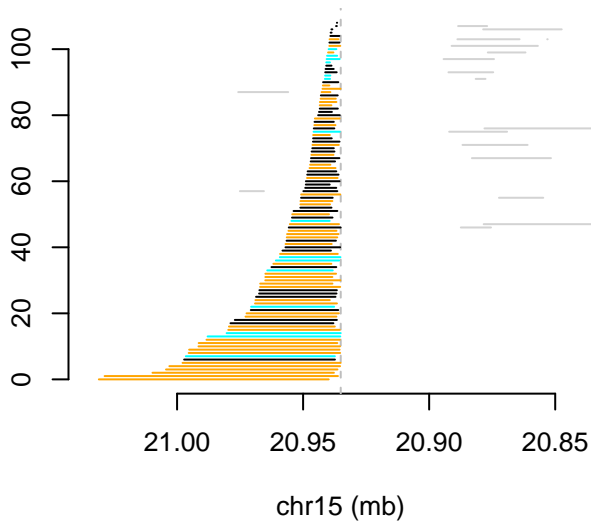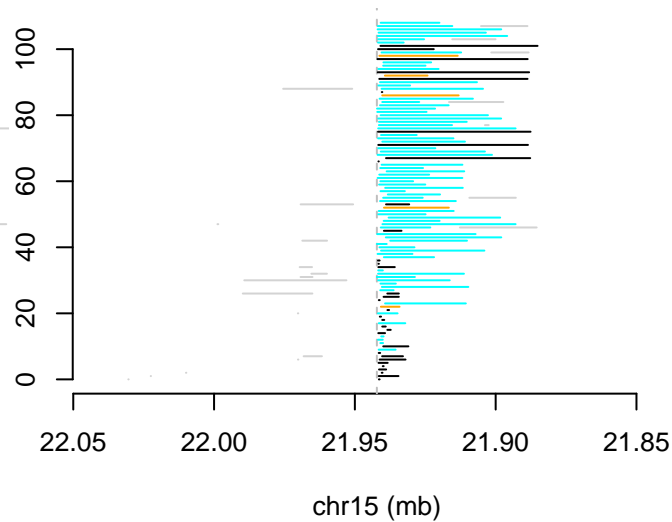

Copy number

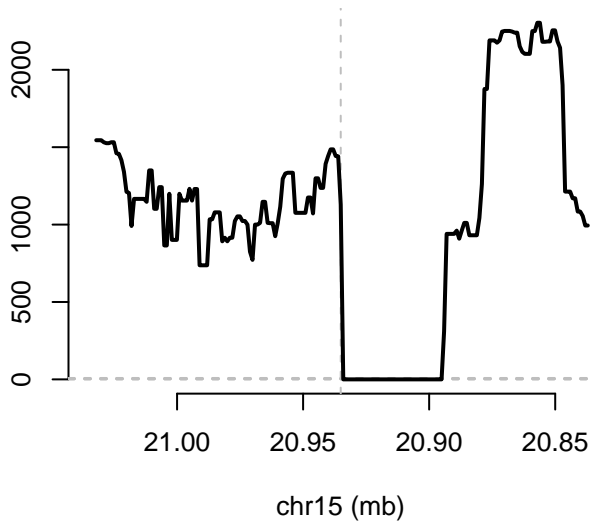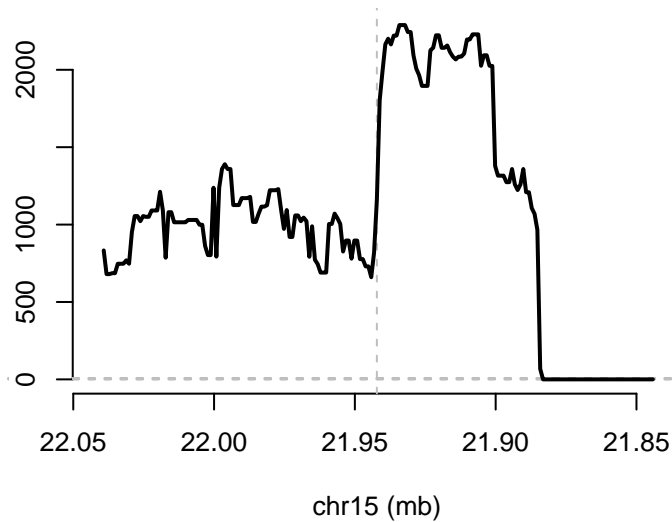

K562 chr15:20,935,074::chr15:21,942,184-+

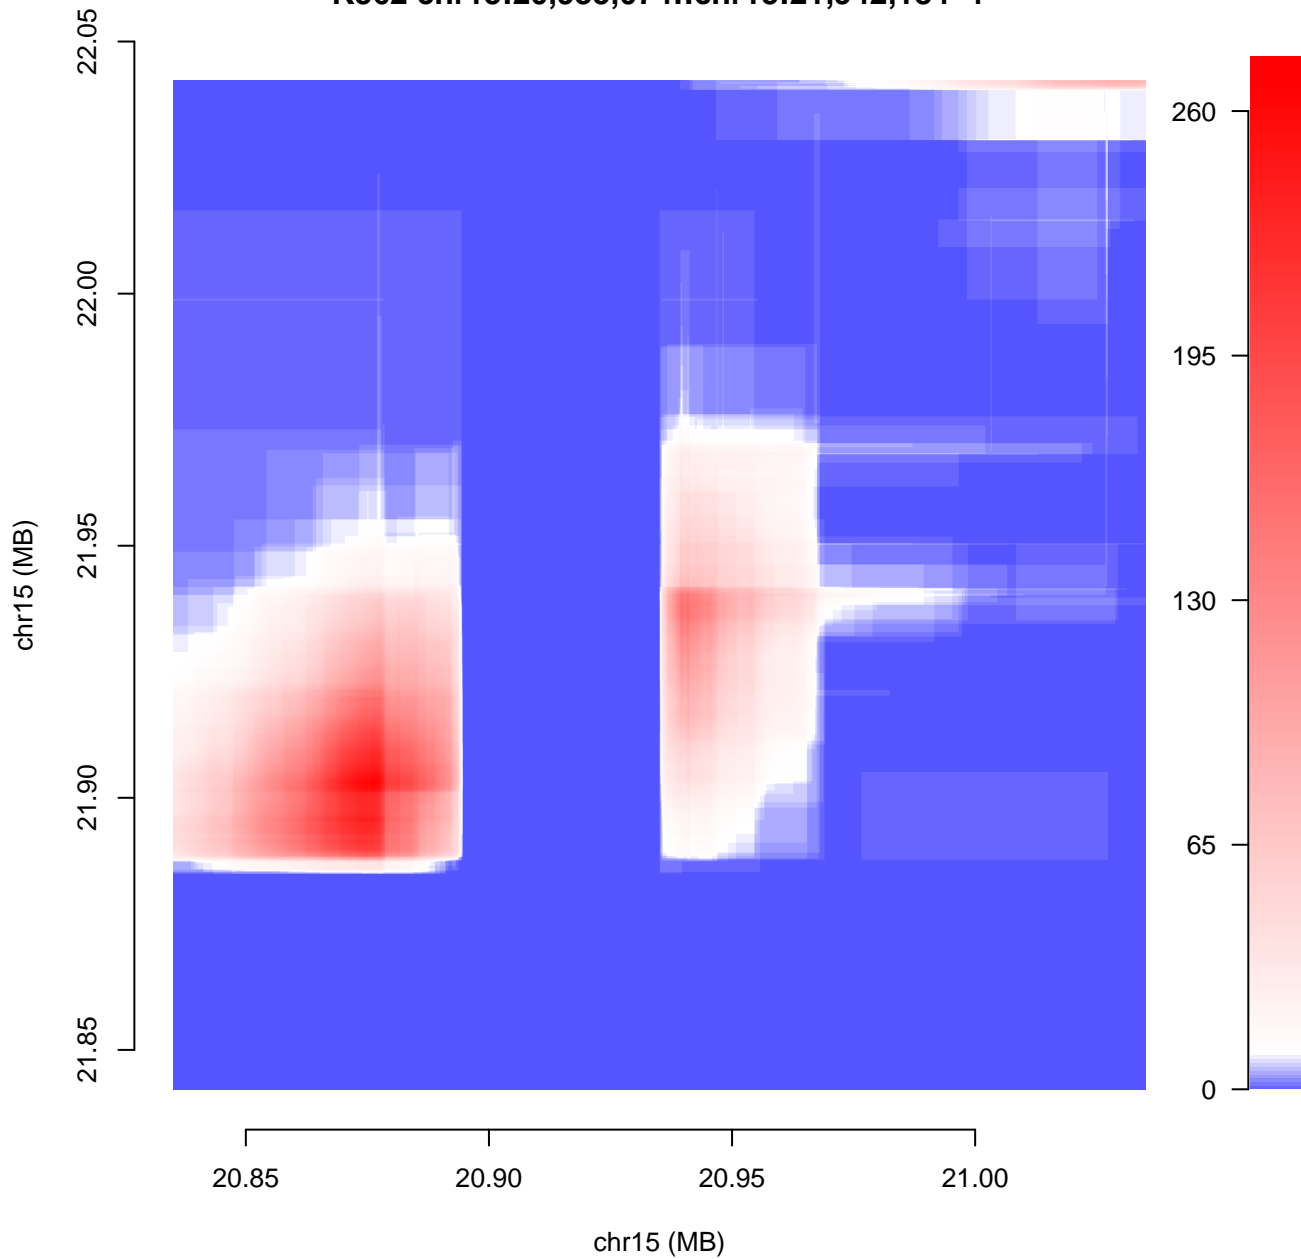

Supplement: Supplemental_Data.zip [file event_124.pdf › event_124.pdf]

Barcode

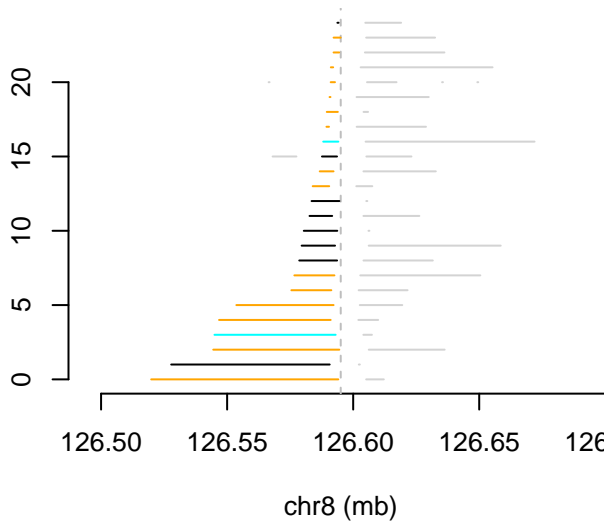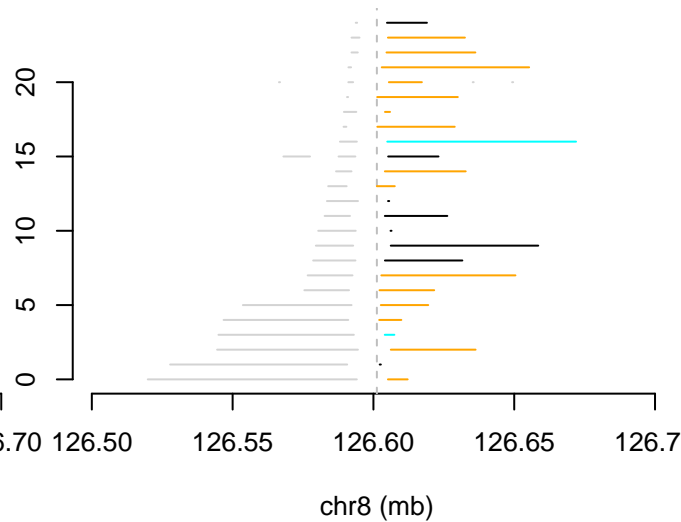

Copy number

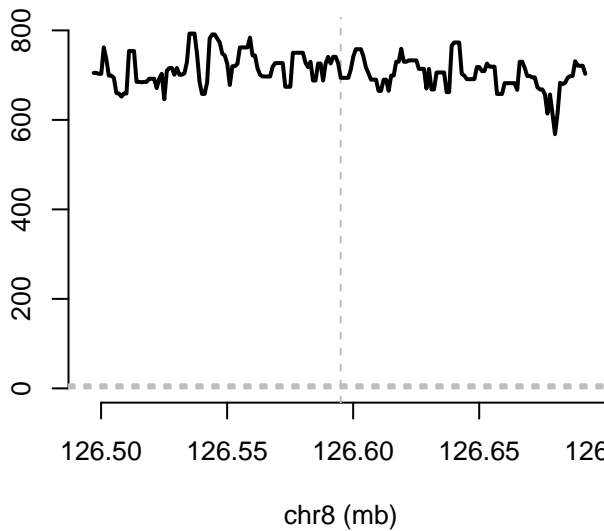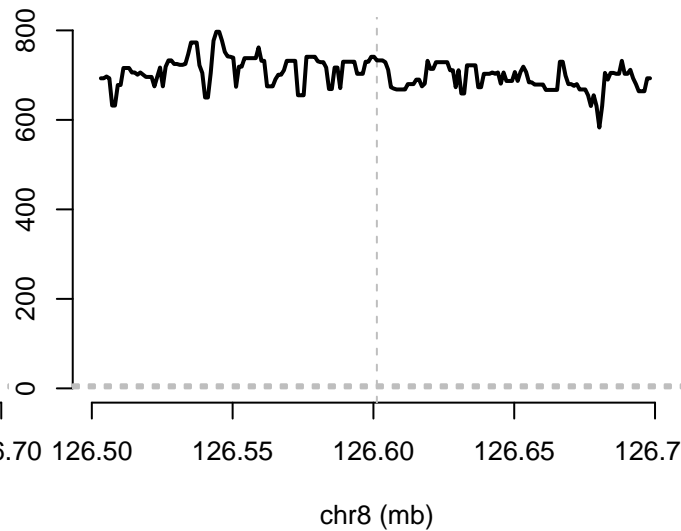

K562 chr8:126,601,225::chr8:126,595,066--+

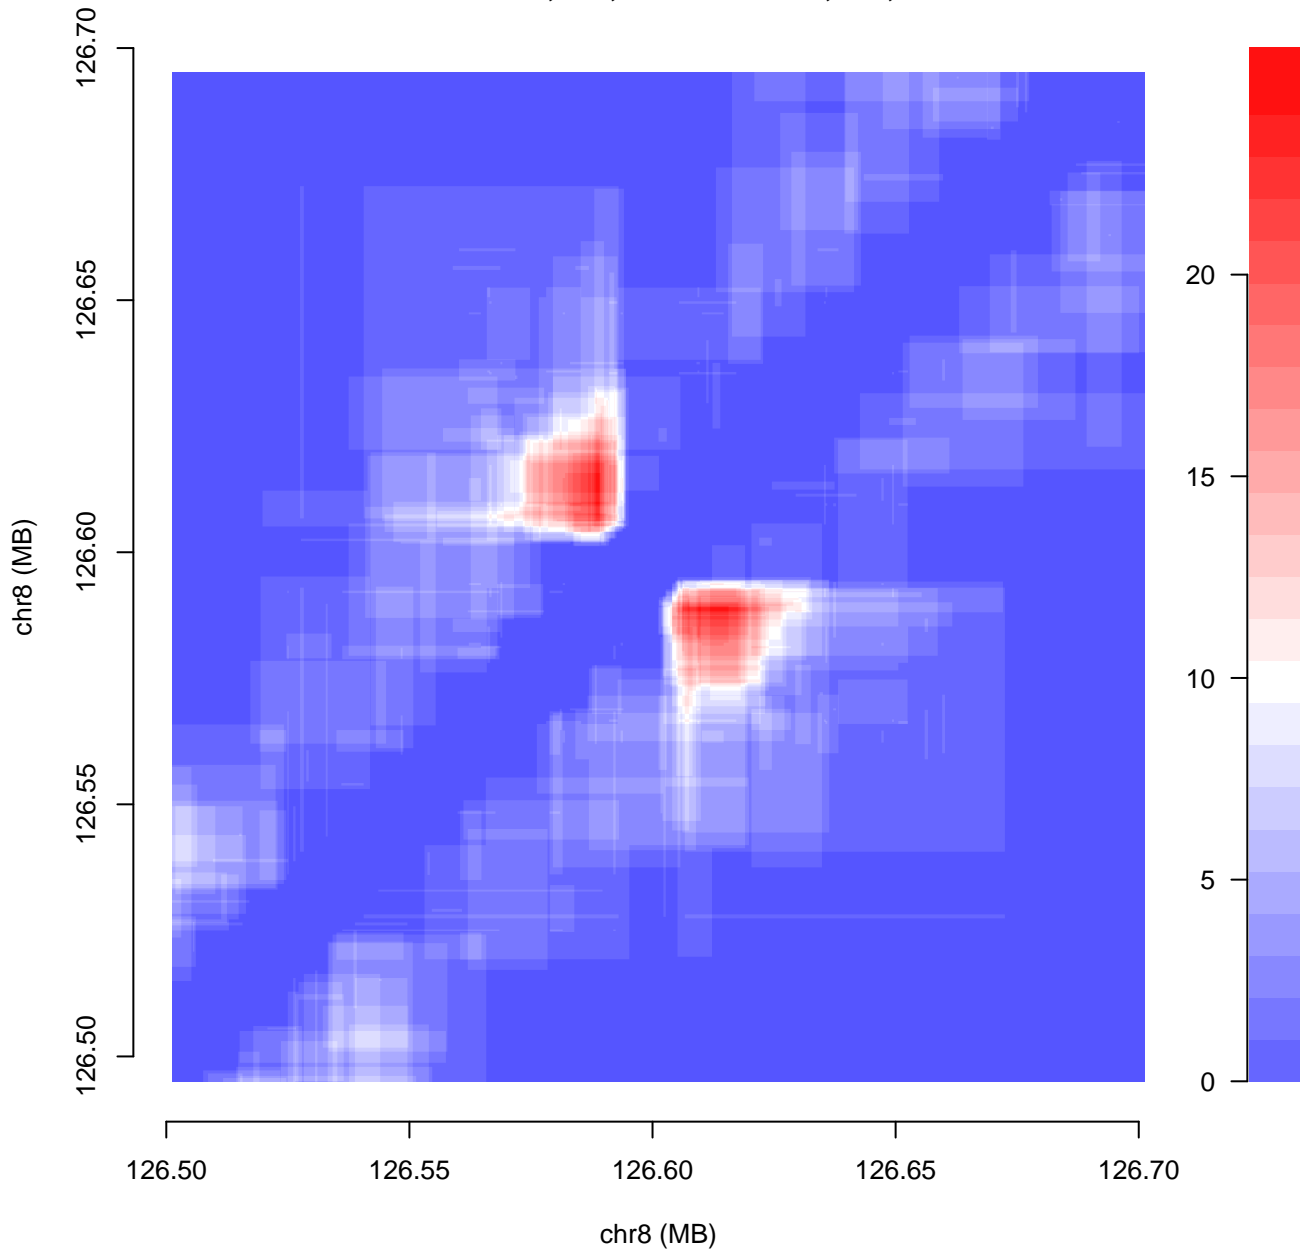

Supplement: Supplemental_Data.zip [file event_125.pdf › event_125.pdf]

Barcode

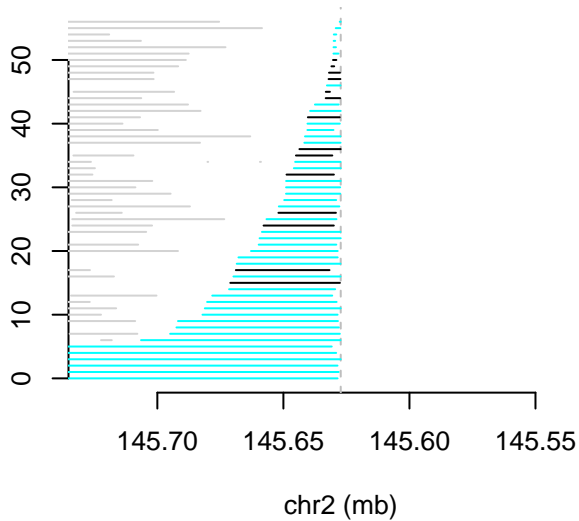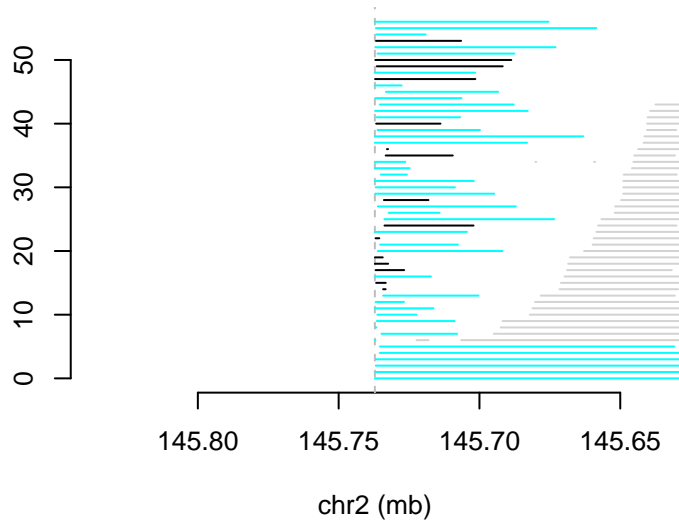

Copy number

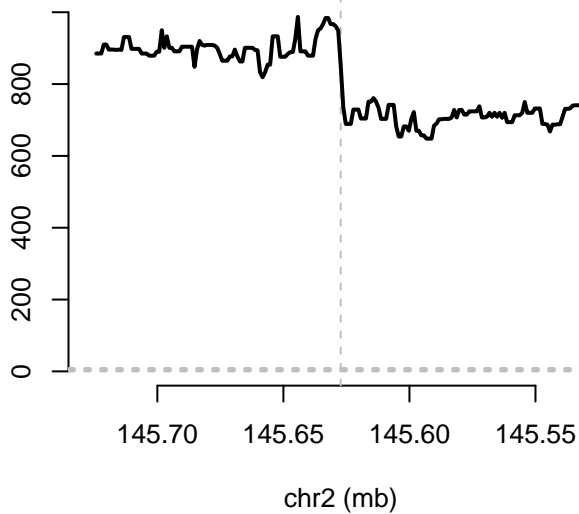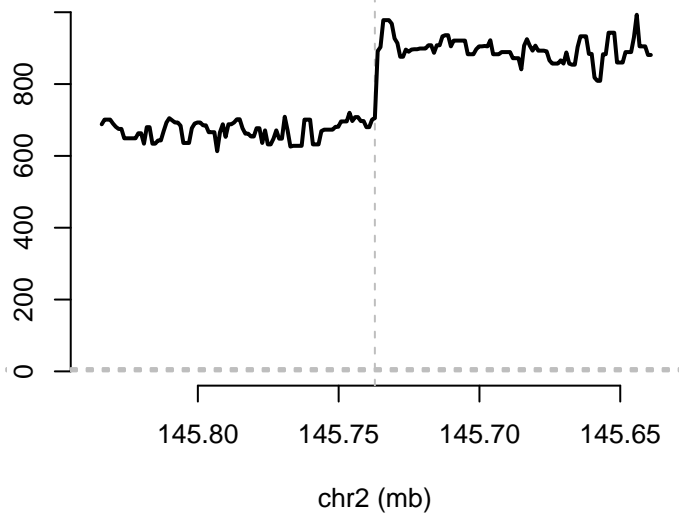

K562 chr2:145,737,142::chr2:145,627,253+-

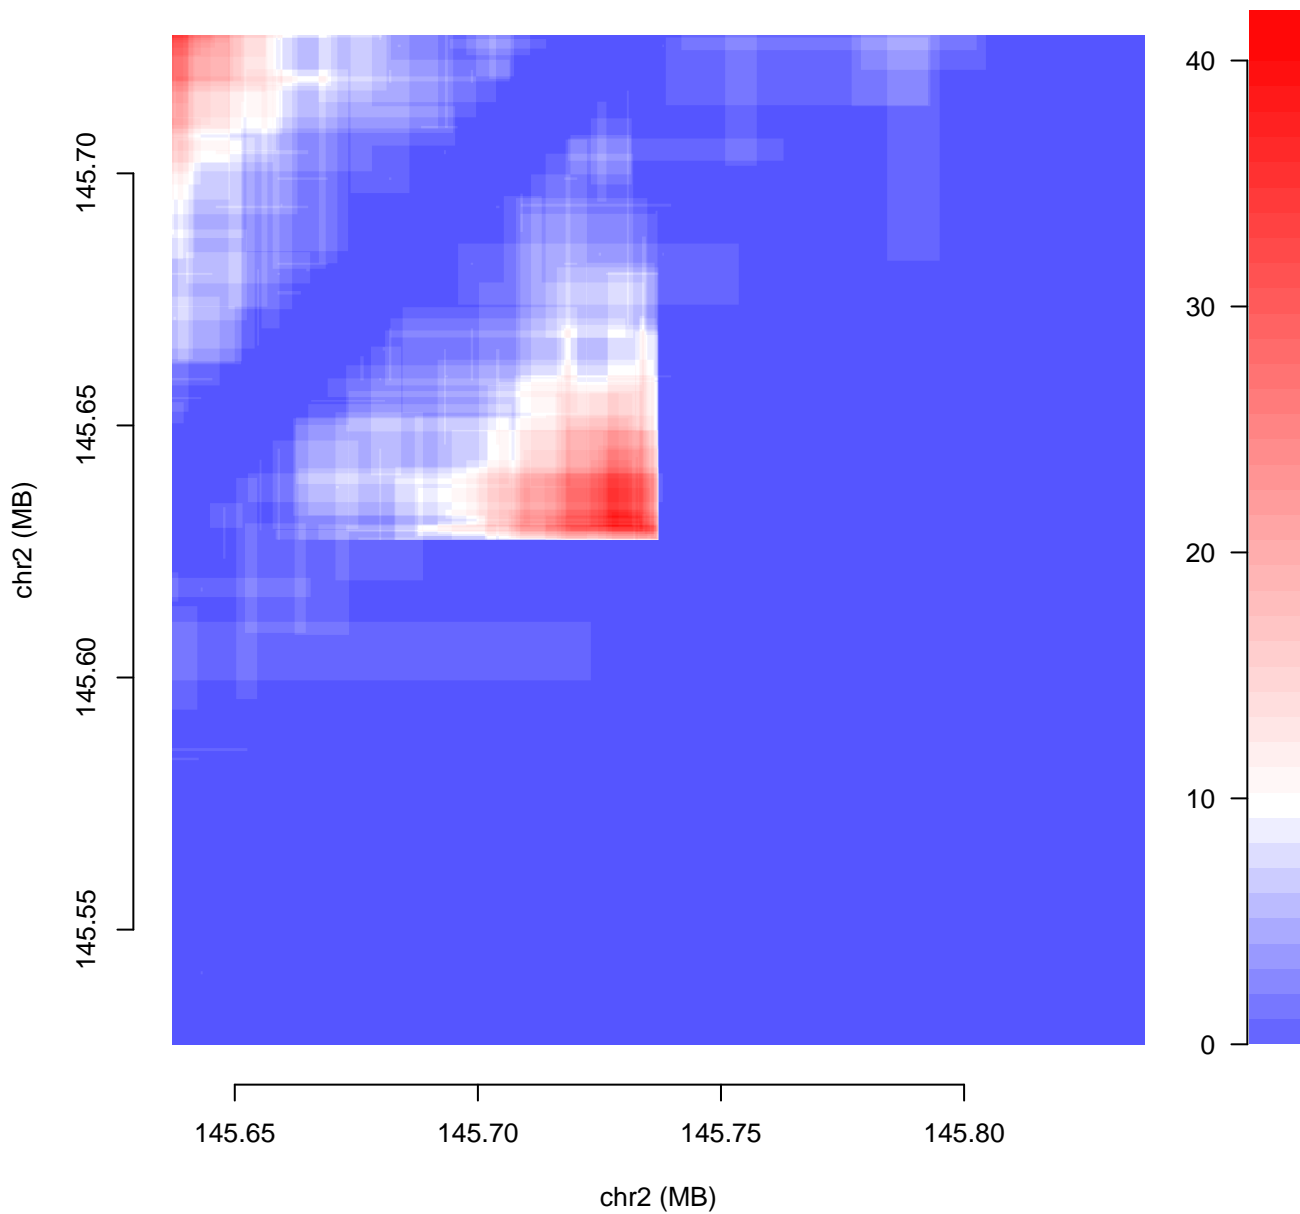

Supplement: Supplemental_Data.zip [file event_126.pdf › event_126.pdf]

Barcode

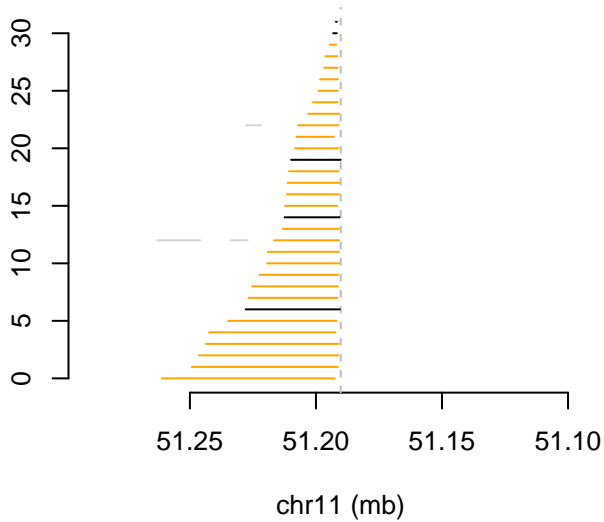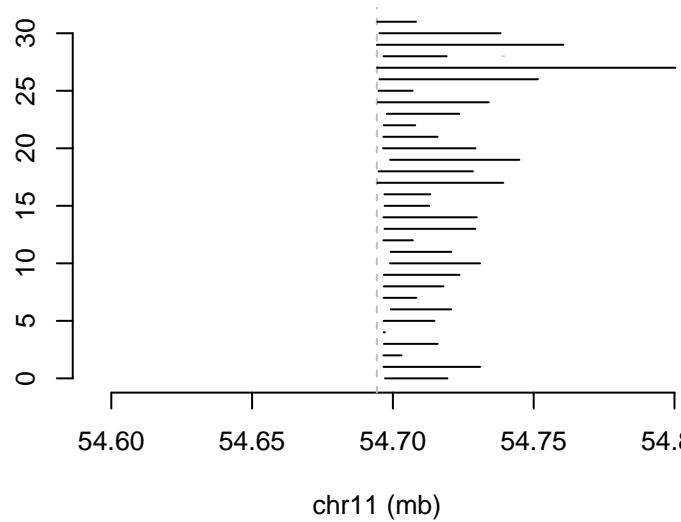

Copy number

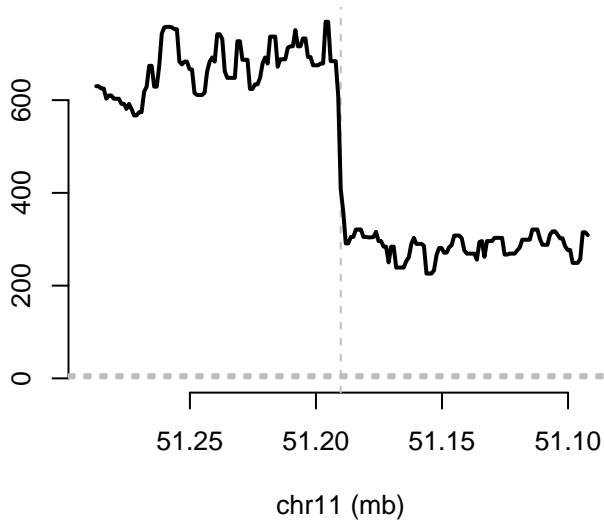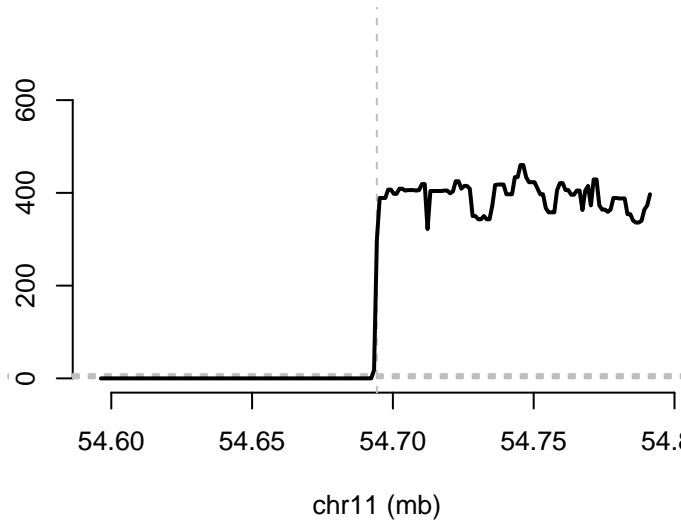

K562 chr11:51,190,164::chr11:54,694,310--

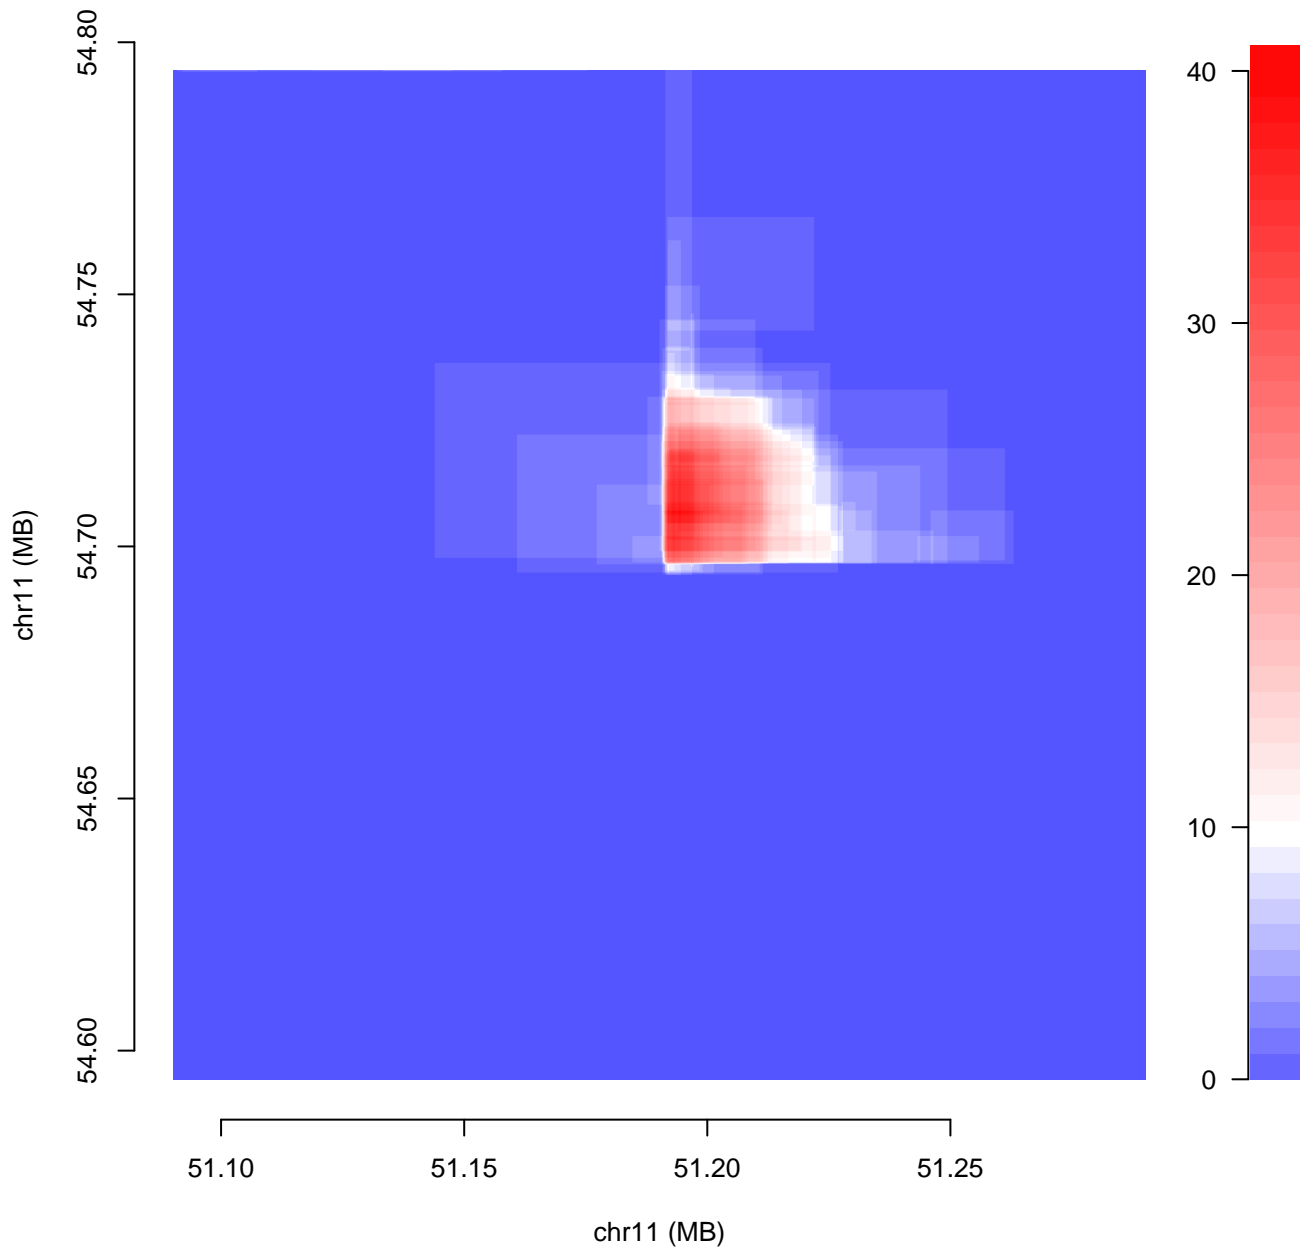

Supplement: Supplemental_Data.zip [file event_127.pdf › event_127.pdf]

Barcode

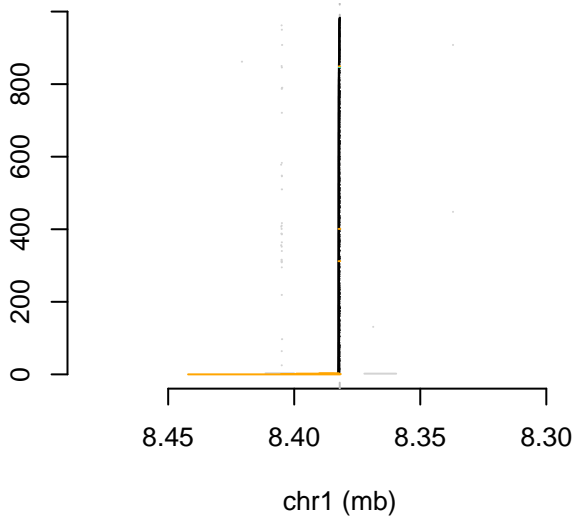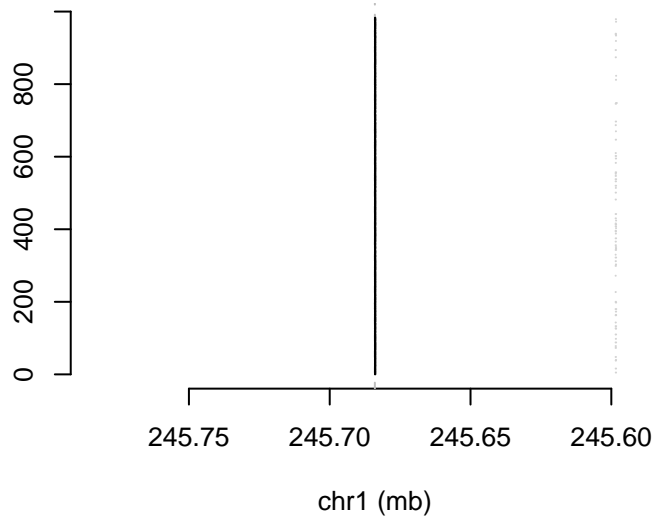

Copy number

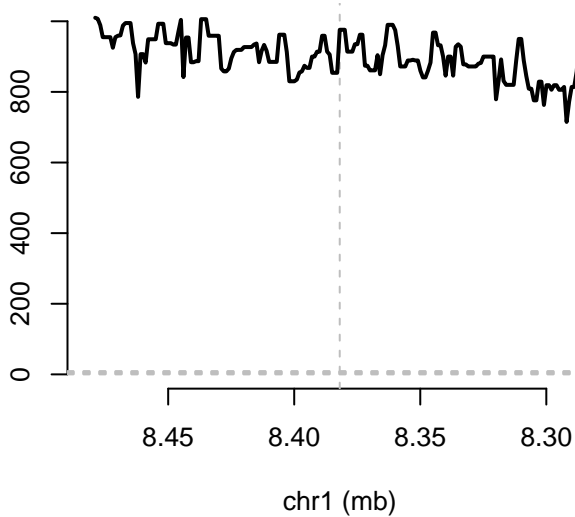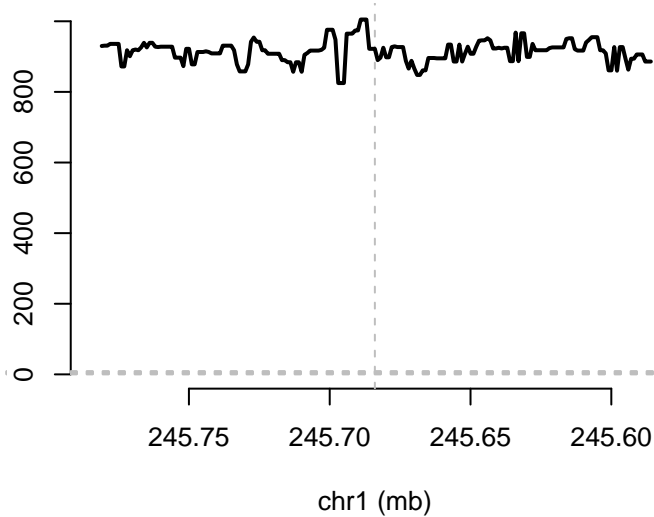

K562 chr1:8,381,941::chr1:245,683,968-+

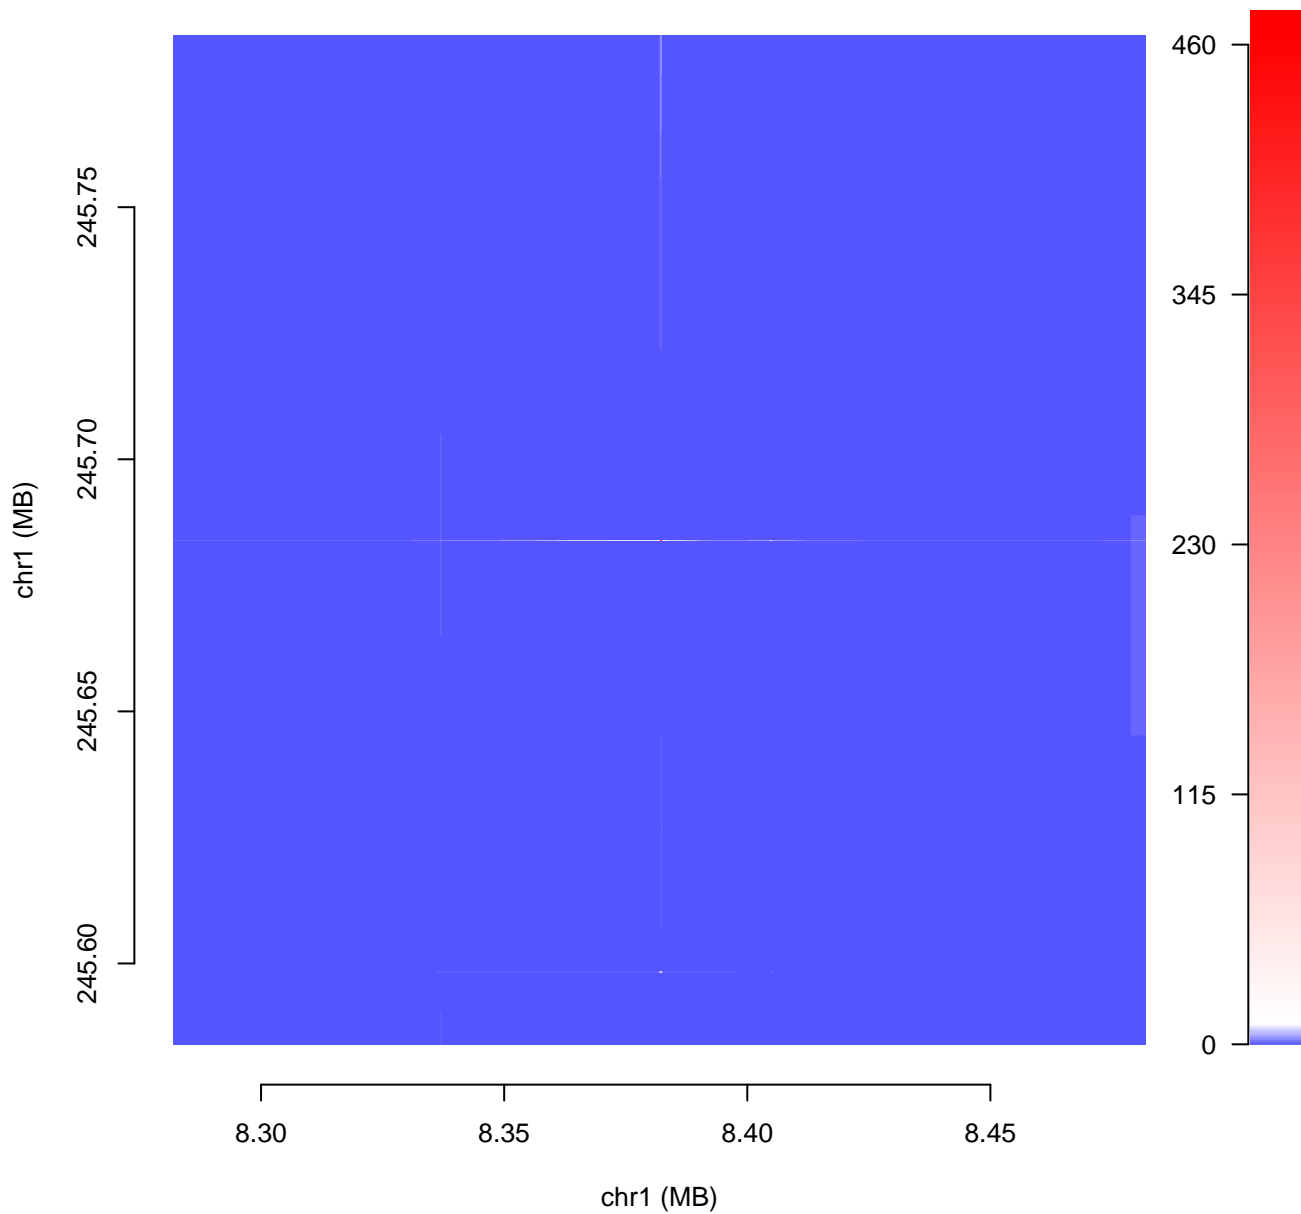

Supplement: Supplemental_Data.zip [file event_128.pdf › event_128.pdf]

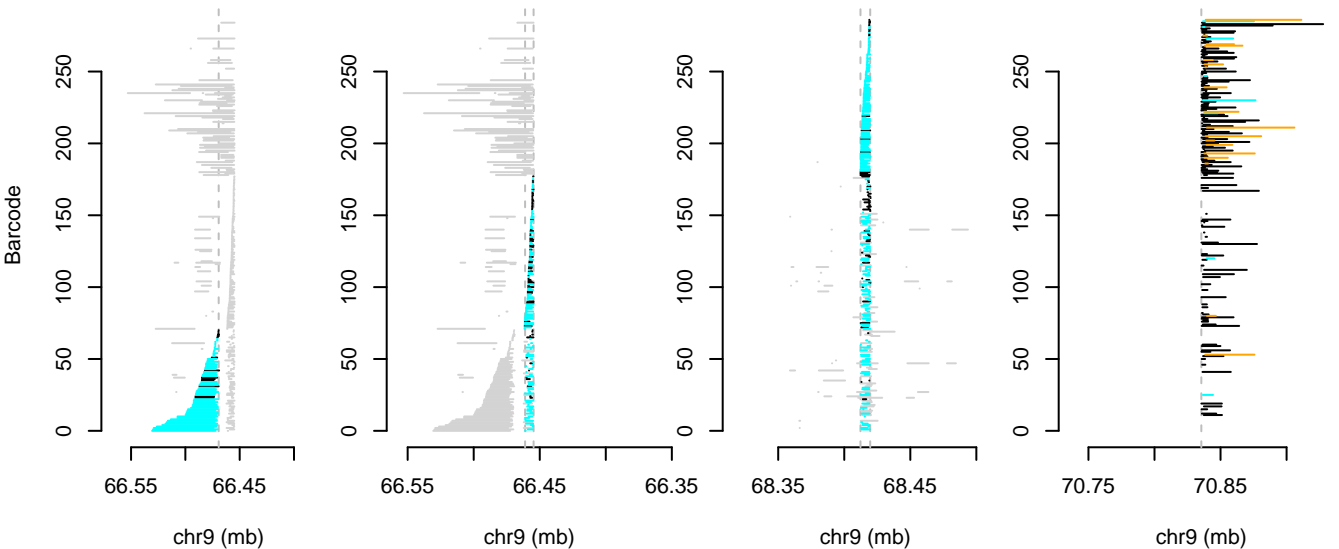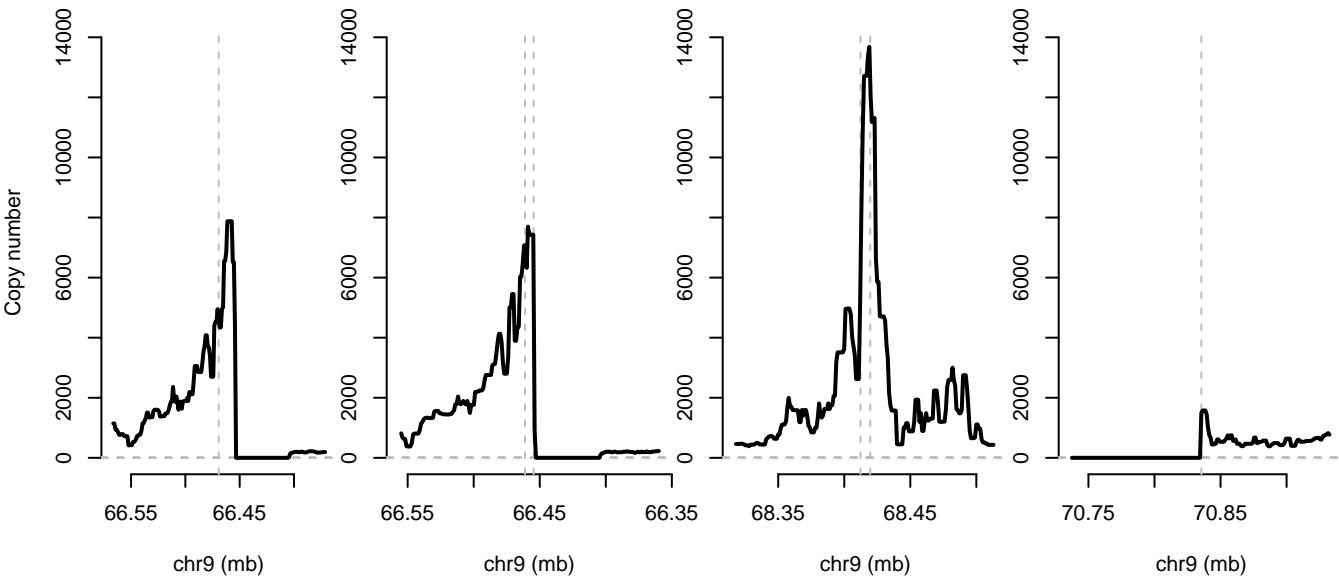

K562 chr9:66,454,654::chr9:68,412,282--

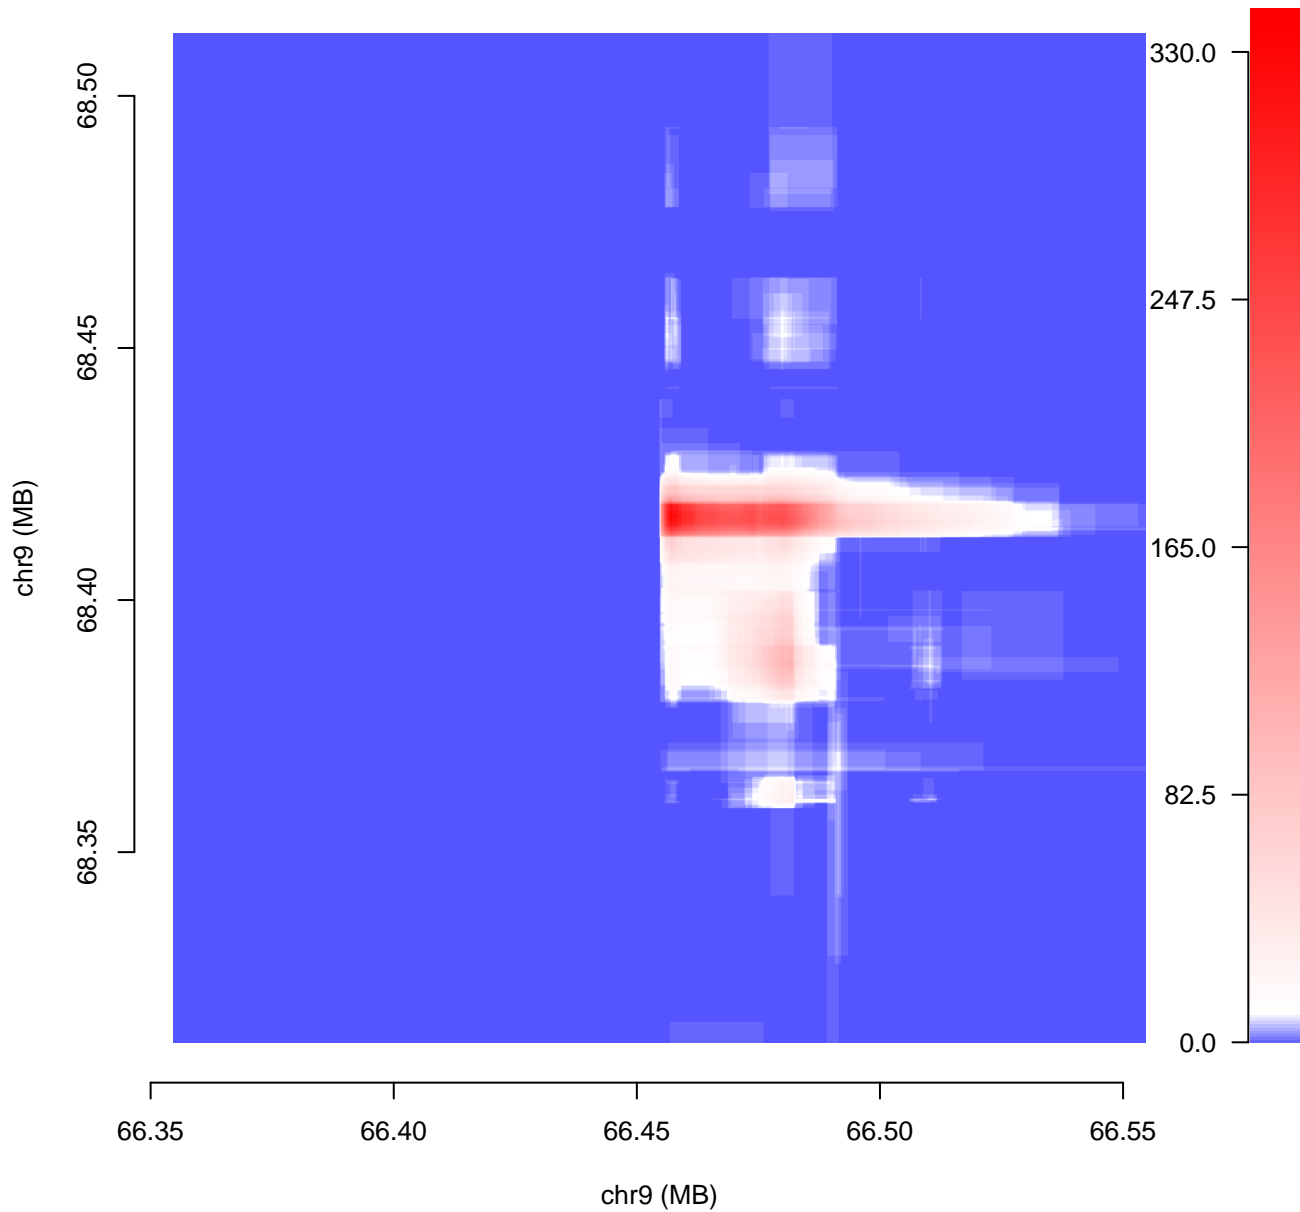

K562 chr9:66,454,654::chr9:66,461,104-+

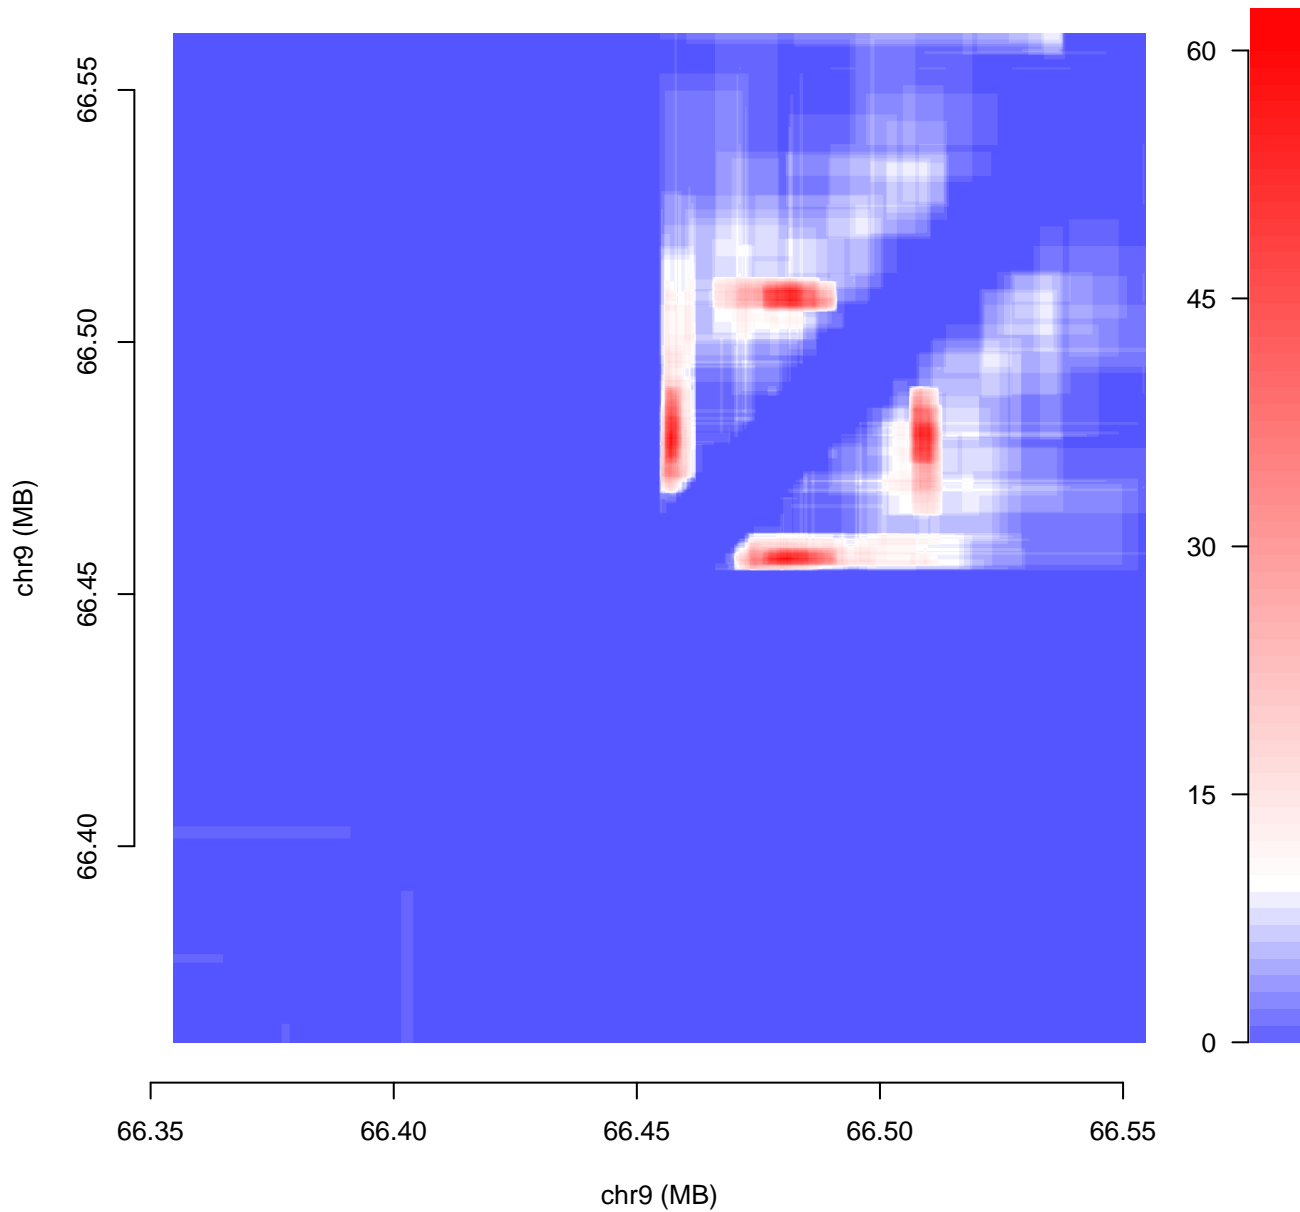

K562 chr9:70,835,468::chr9:68,419,638--+

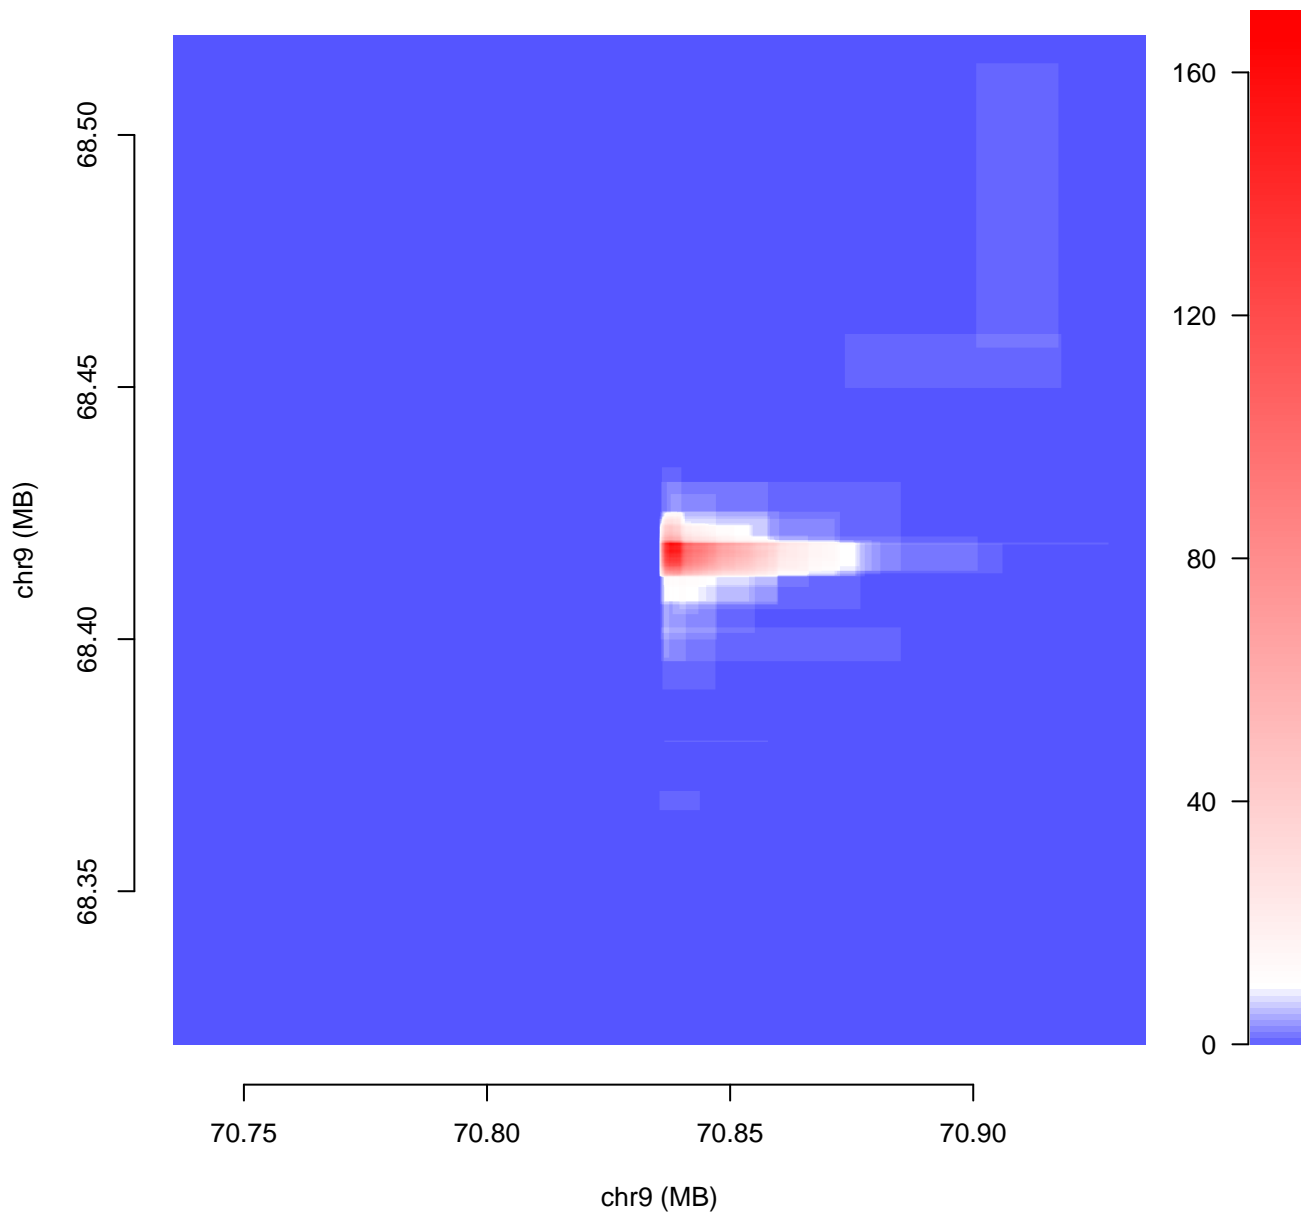

K562 chr9:68,419,638::chr9:68,412,282+-

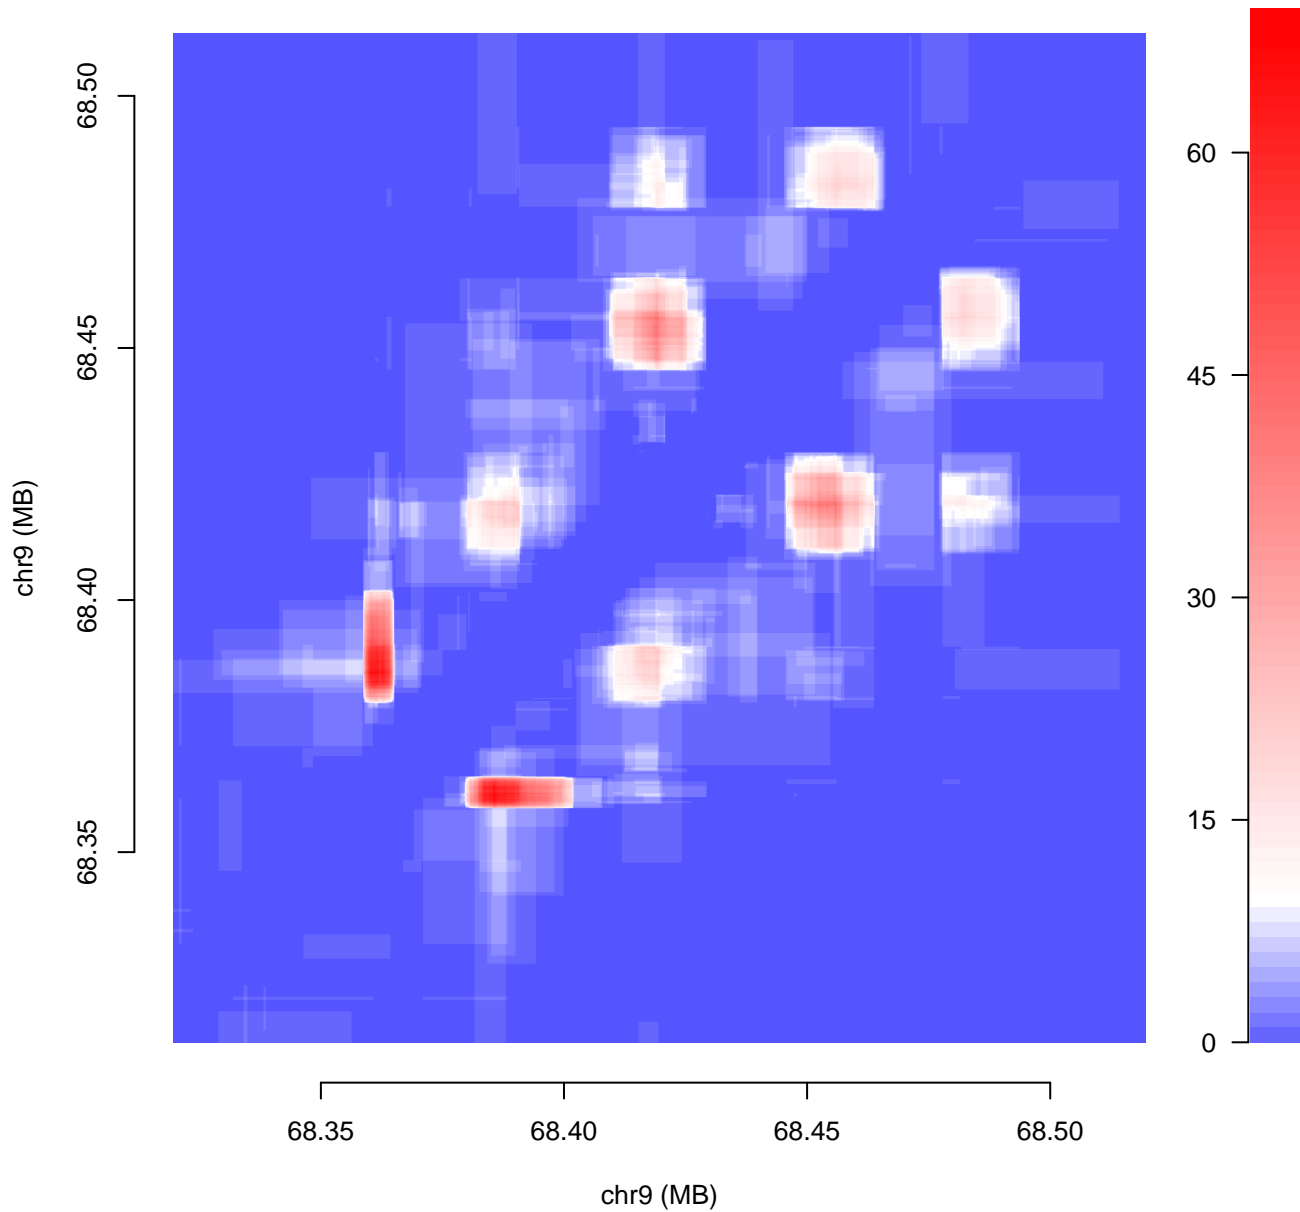

K562 chr9:66,469,326::chr9:66,461,104-+

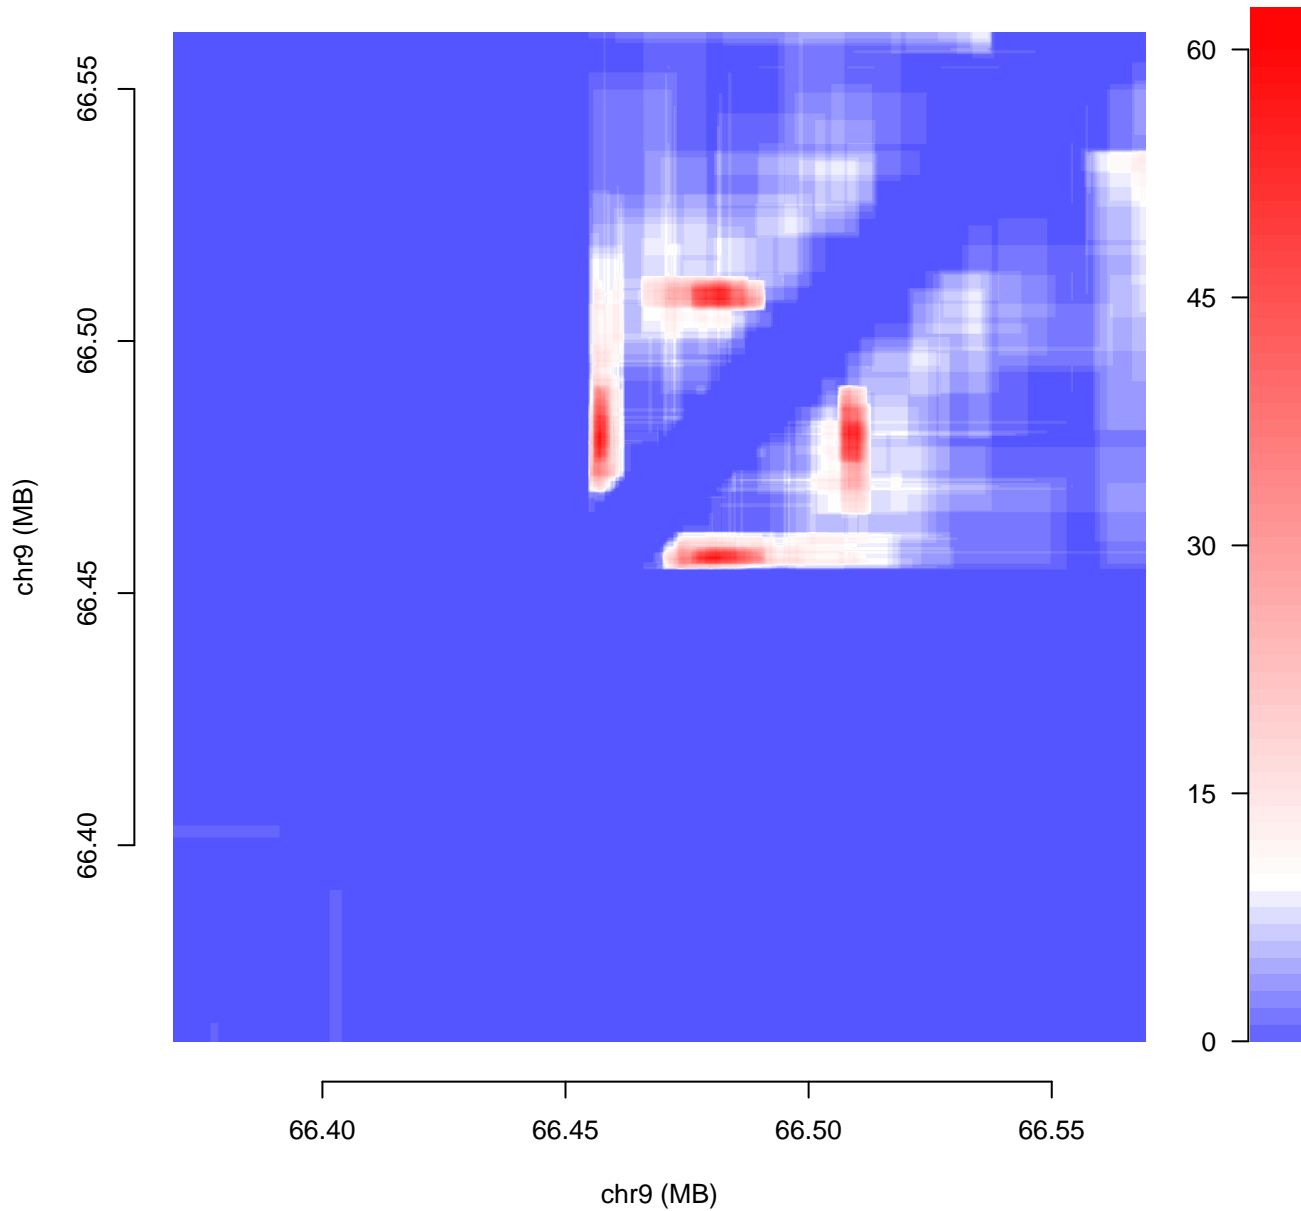

Supplement: Supplemental_Data.zip [file event_129.pdf › event_129.pdf]

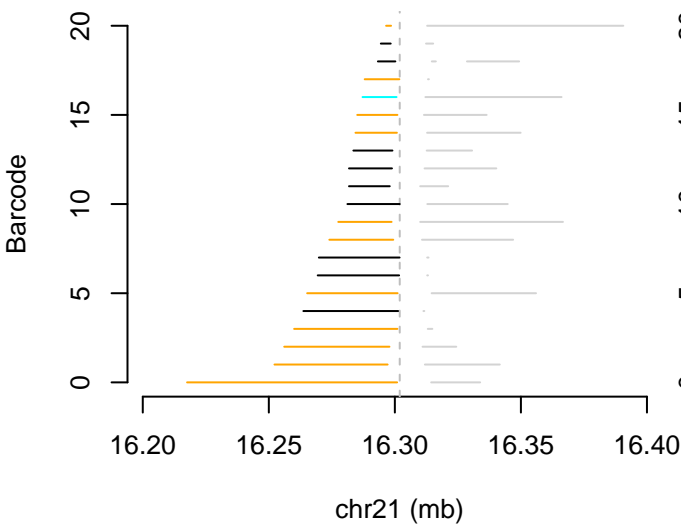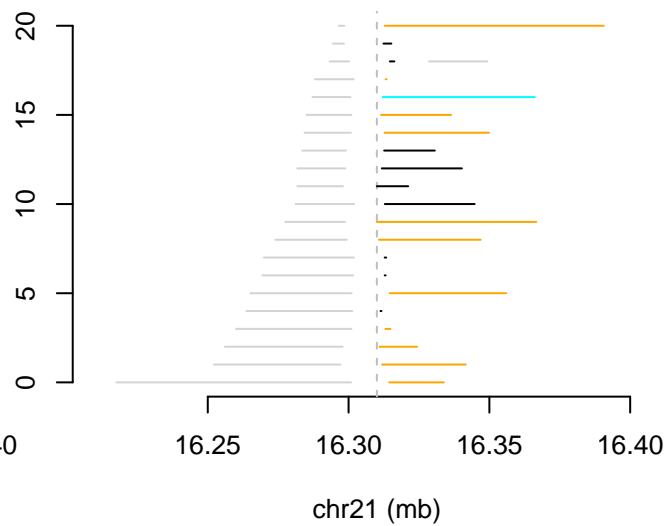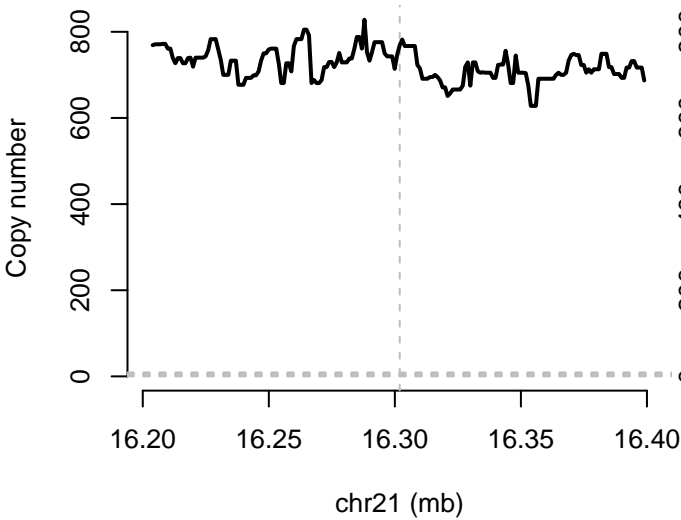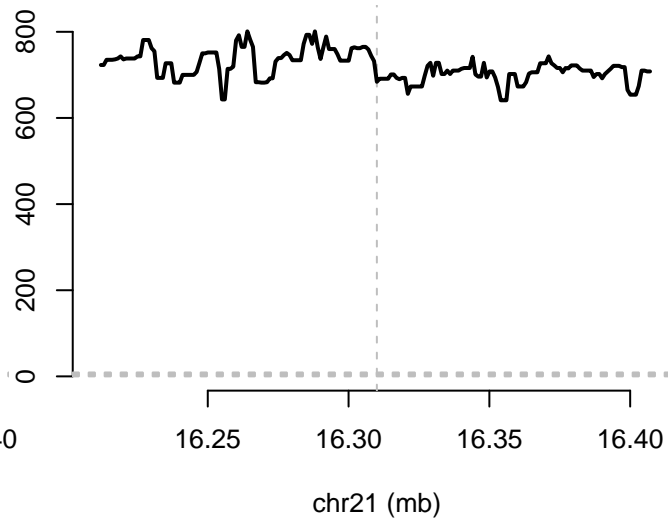

K562 chr21:16,310,051::chr21:16,301,938-+

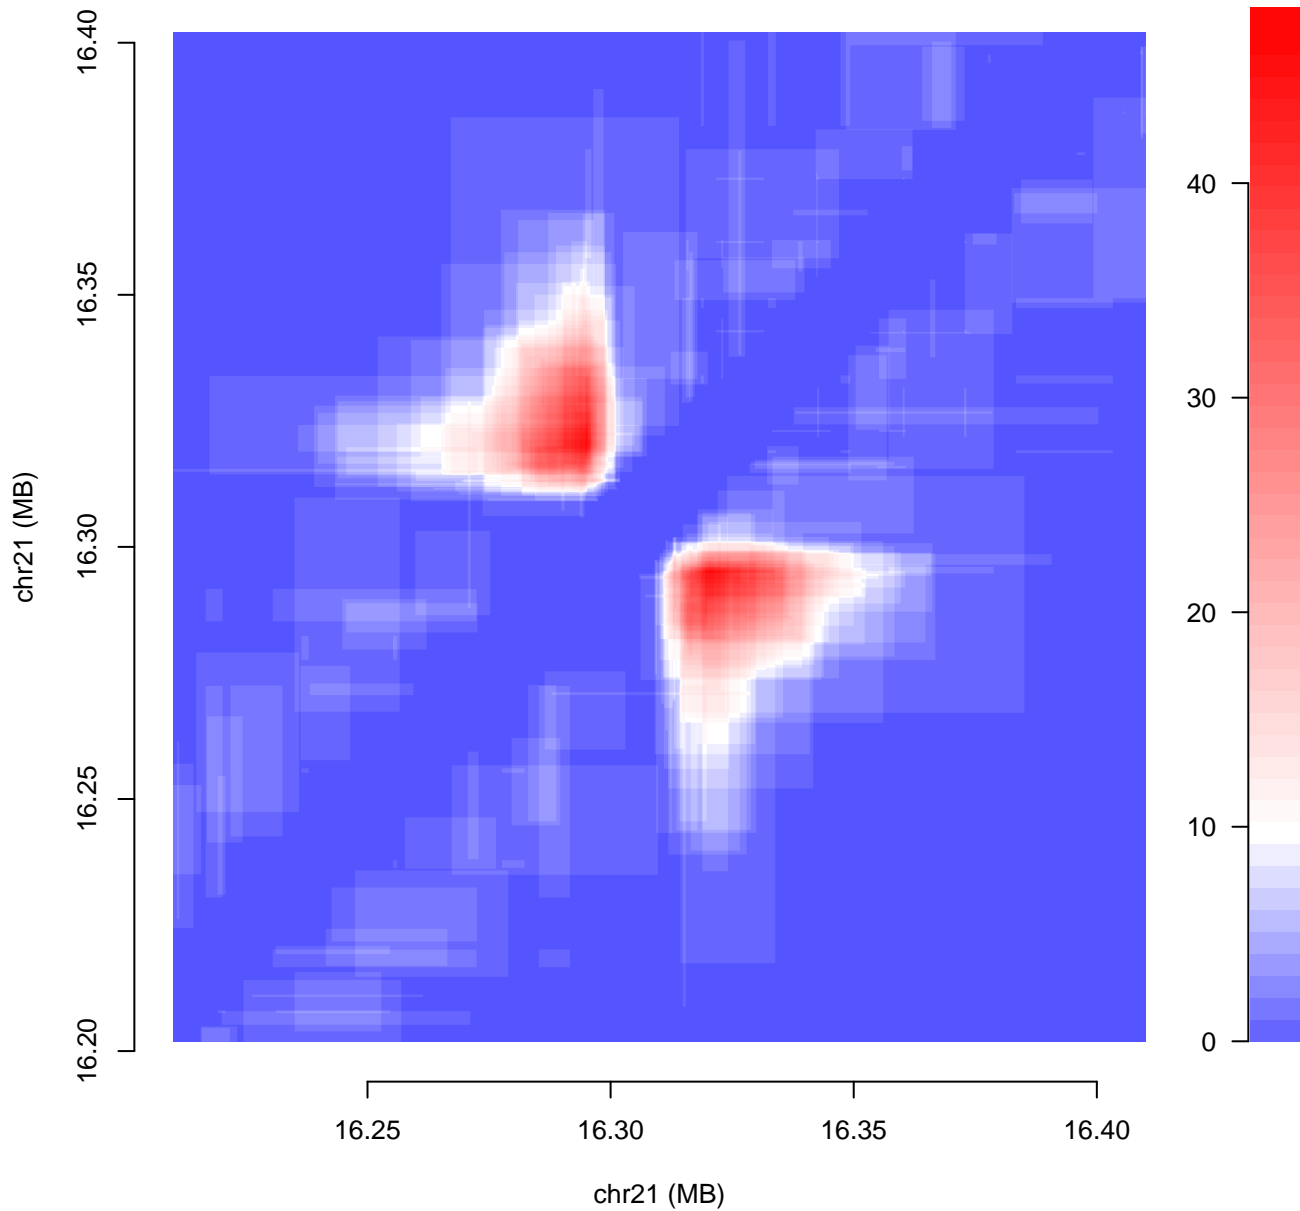

Supplement: Supplemental_Data.zip [file event_13.pdf › event_13.pdf]

Barcode

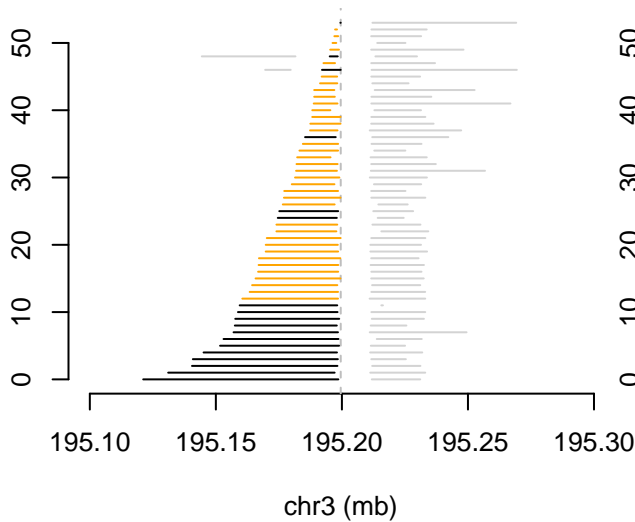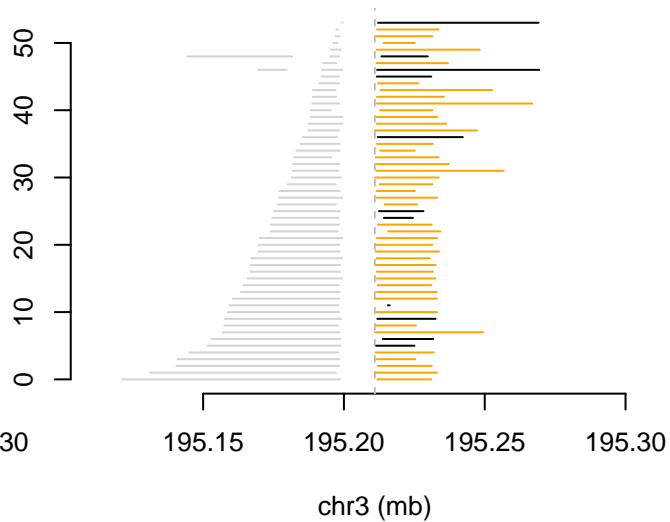

Copy number

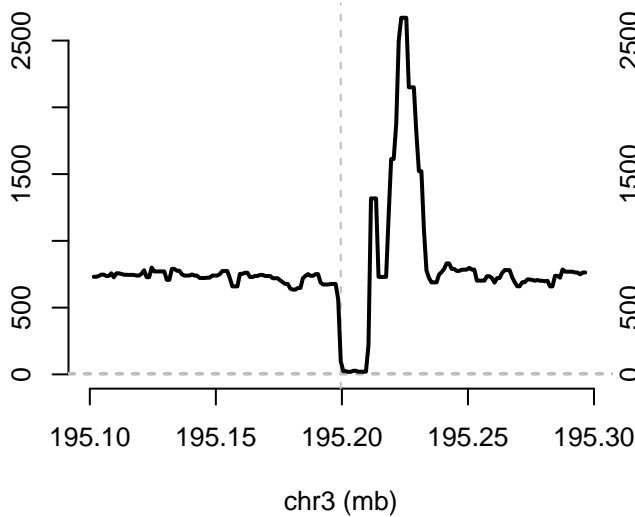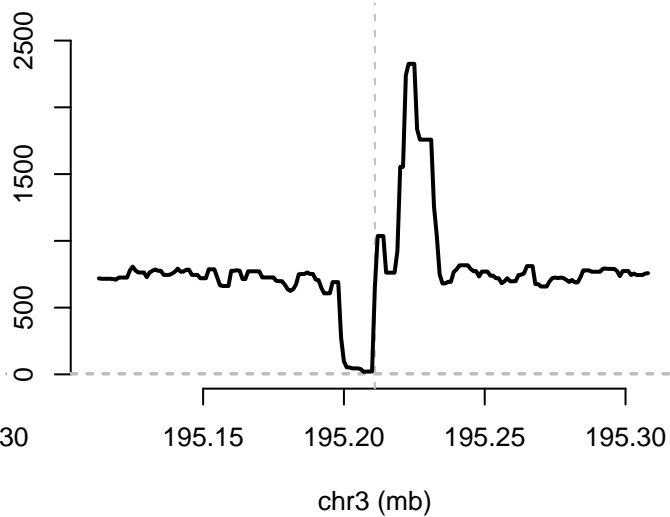

K562 chr3:195,210,987::chr3:195,199,538-+

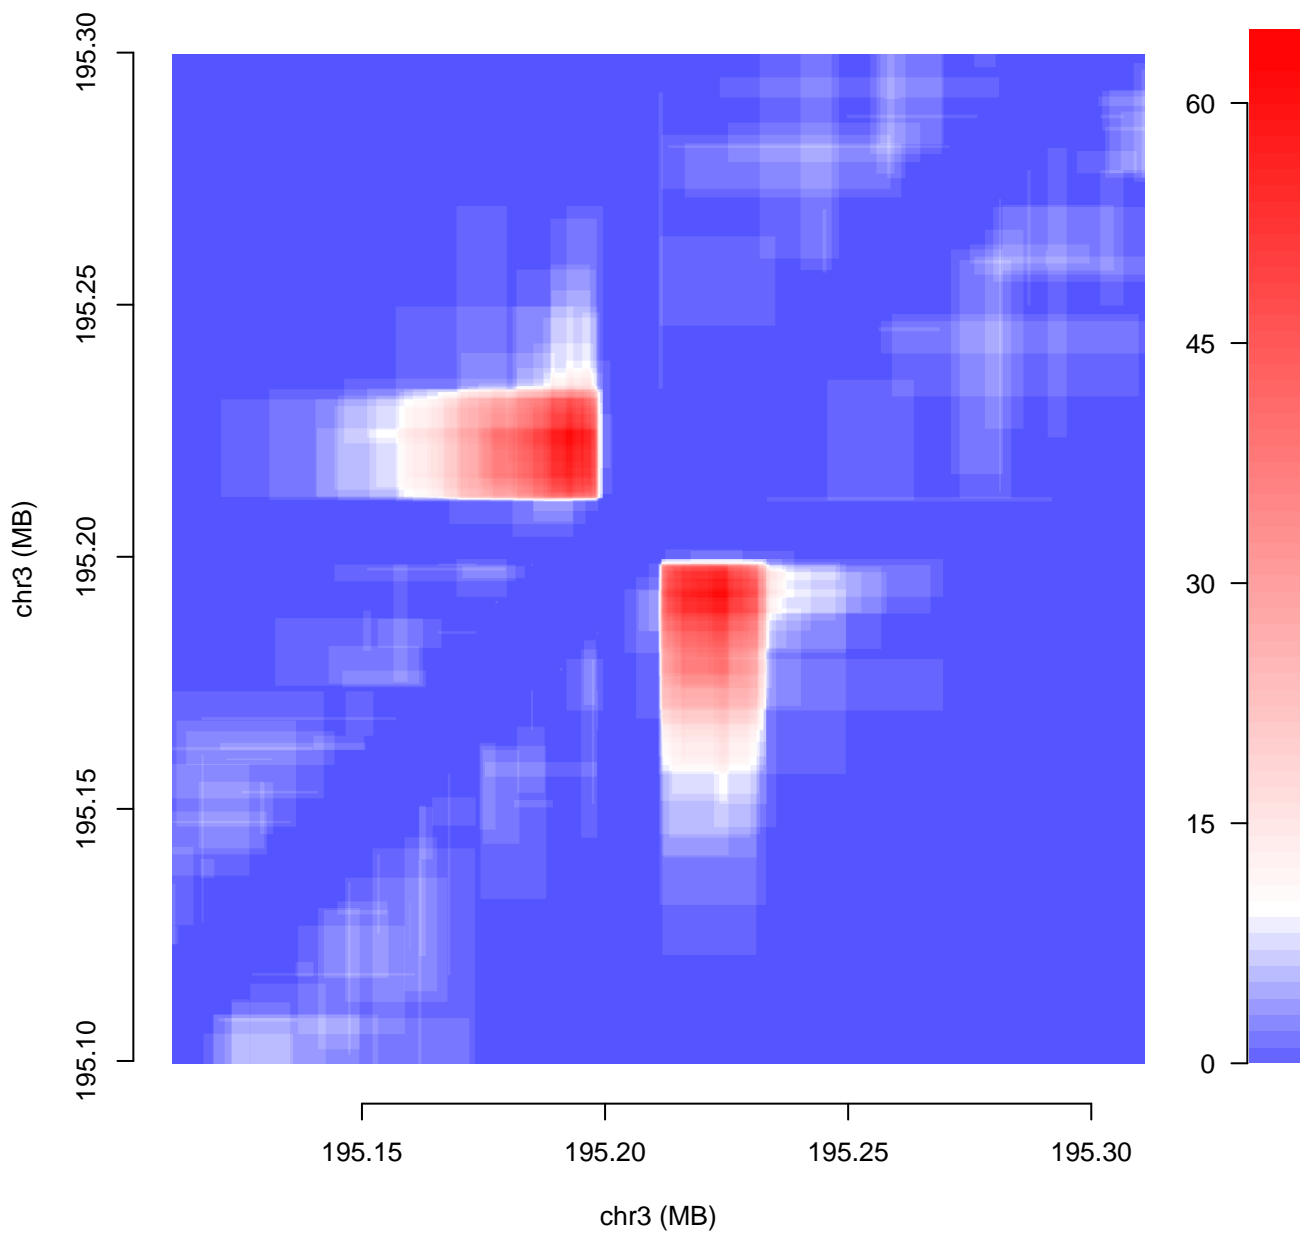

Supplement: Supplemental_Data.zip [file event_130.pdf › event_130.pdf]

Barcode

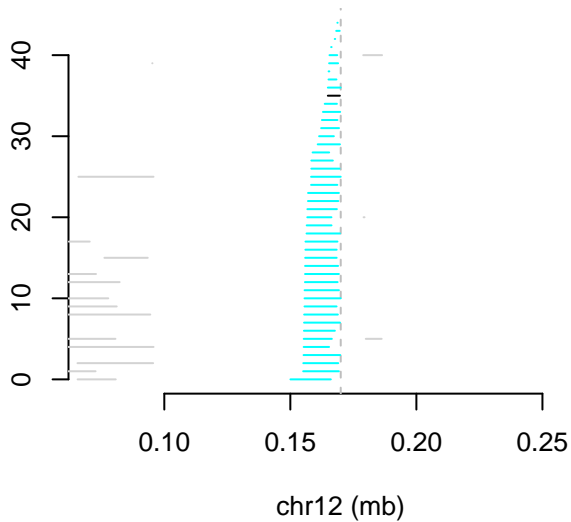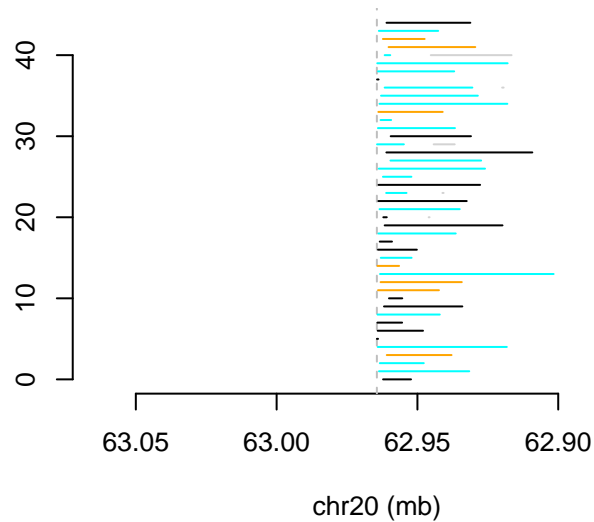

Copy number

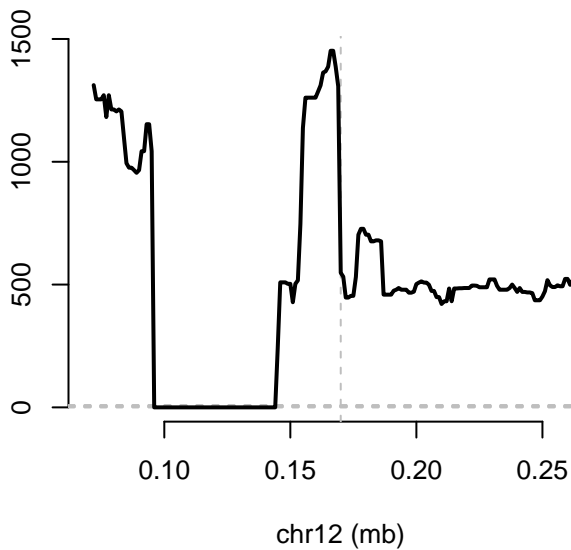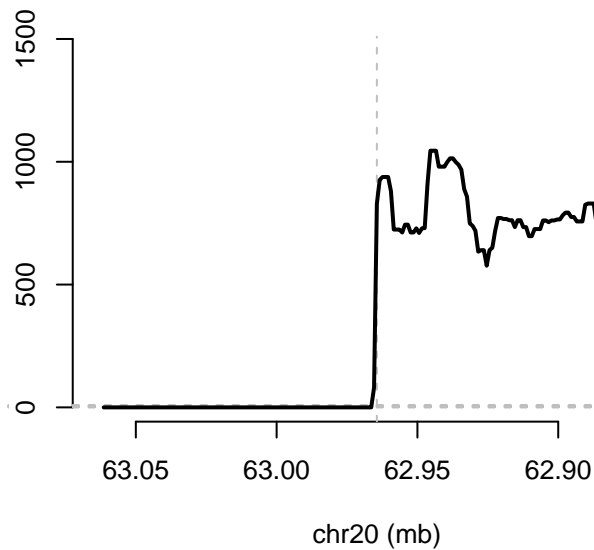

K562 chr12:169,992::chr20:62,964,399++

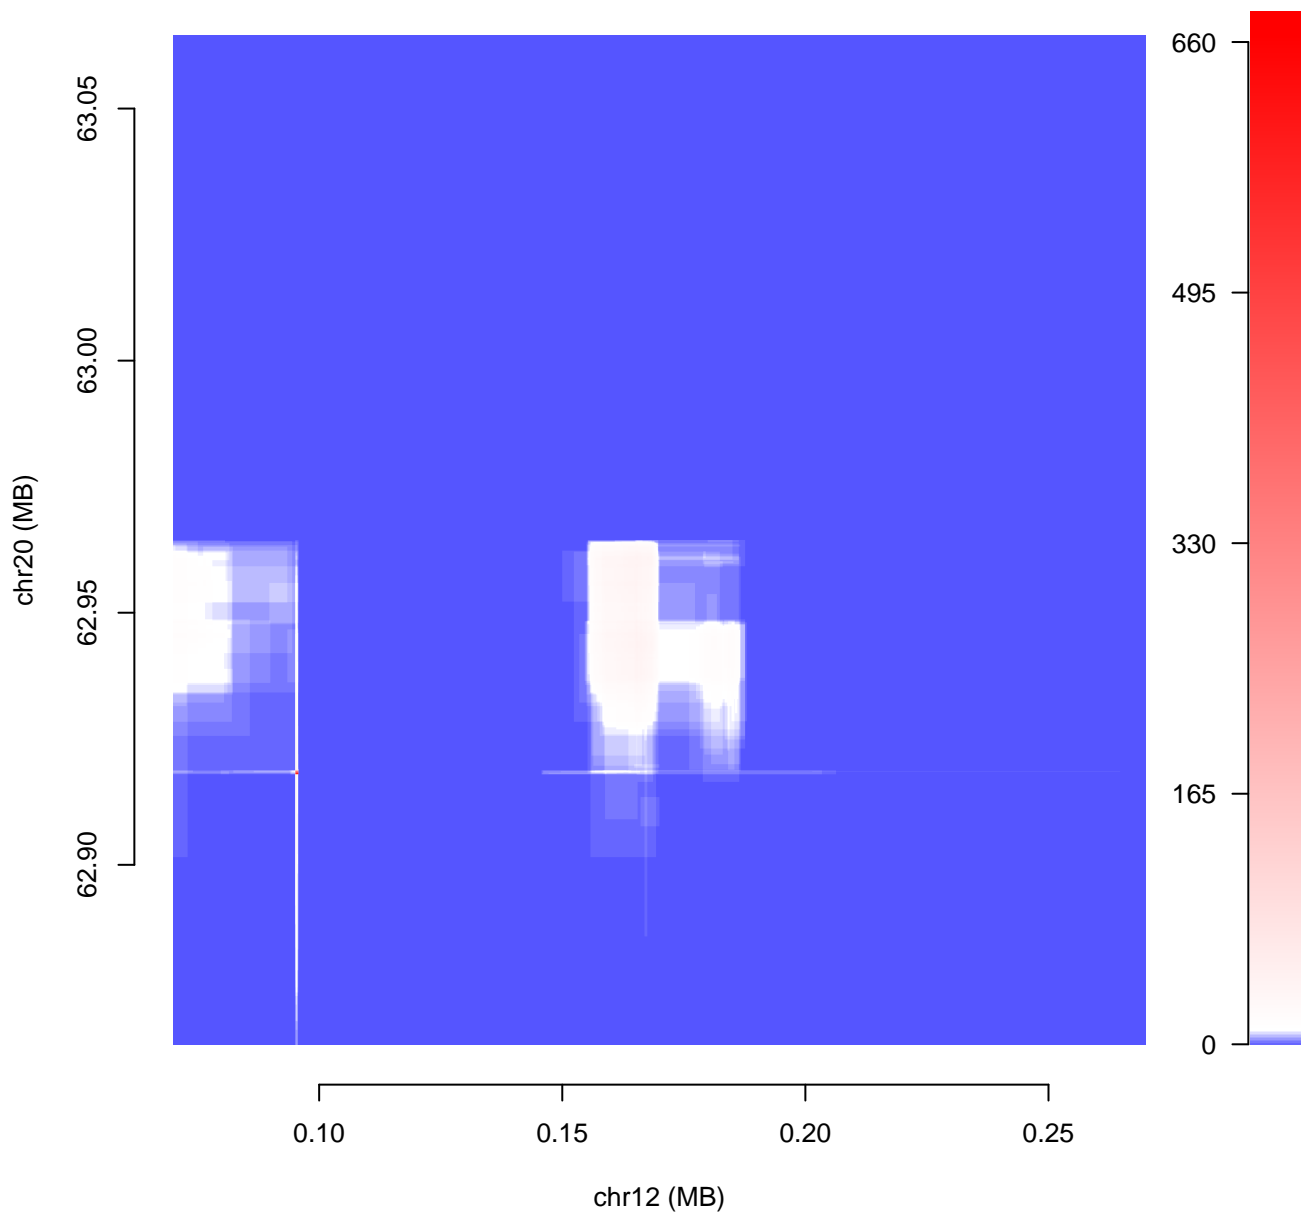

Supplement: Supplemental_Data.zip [file event_131.pdf › event_131.pdf]

Barcode

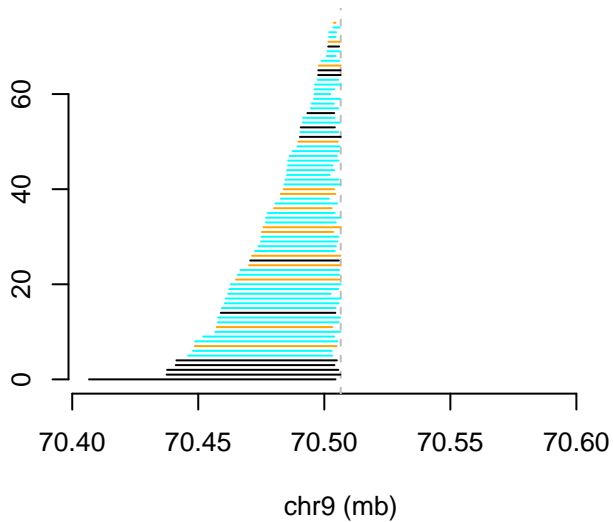

Barcode

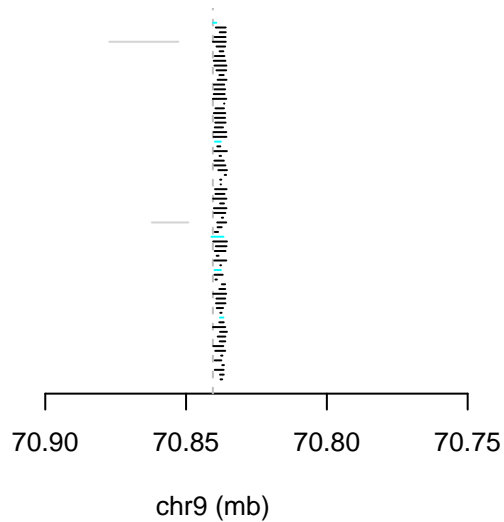

Copy number

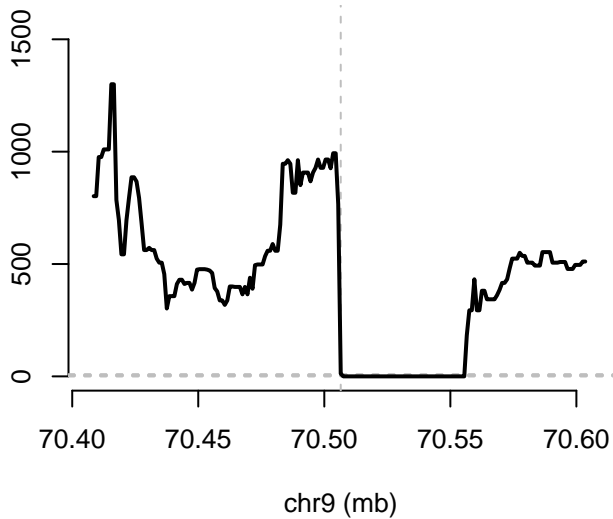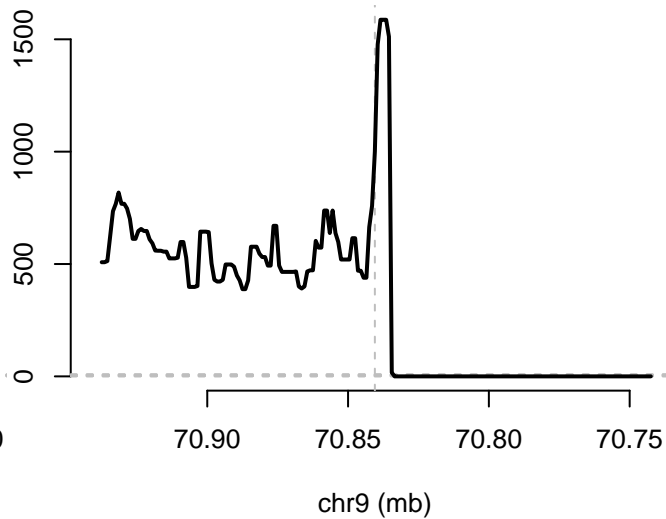

K562 chr9:70,506,522::chr9:70,840,482++

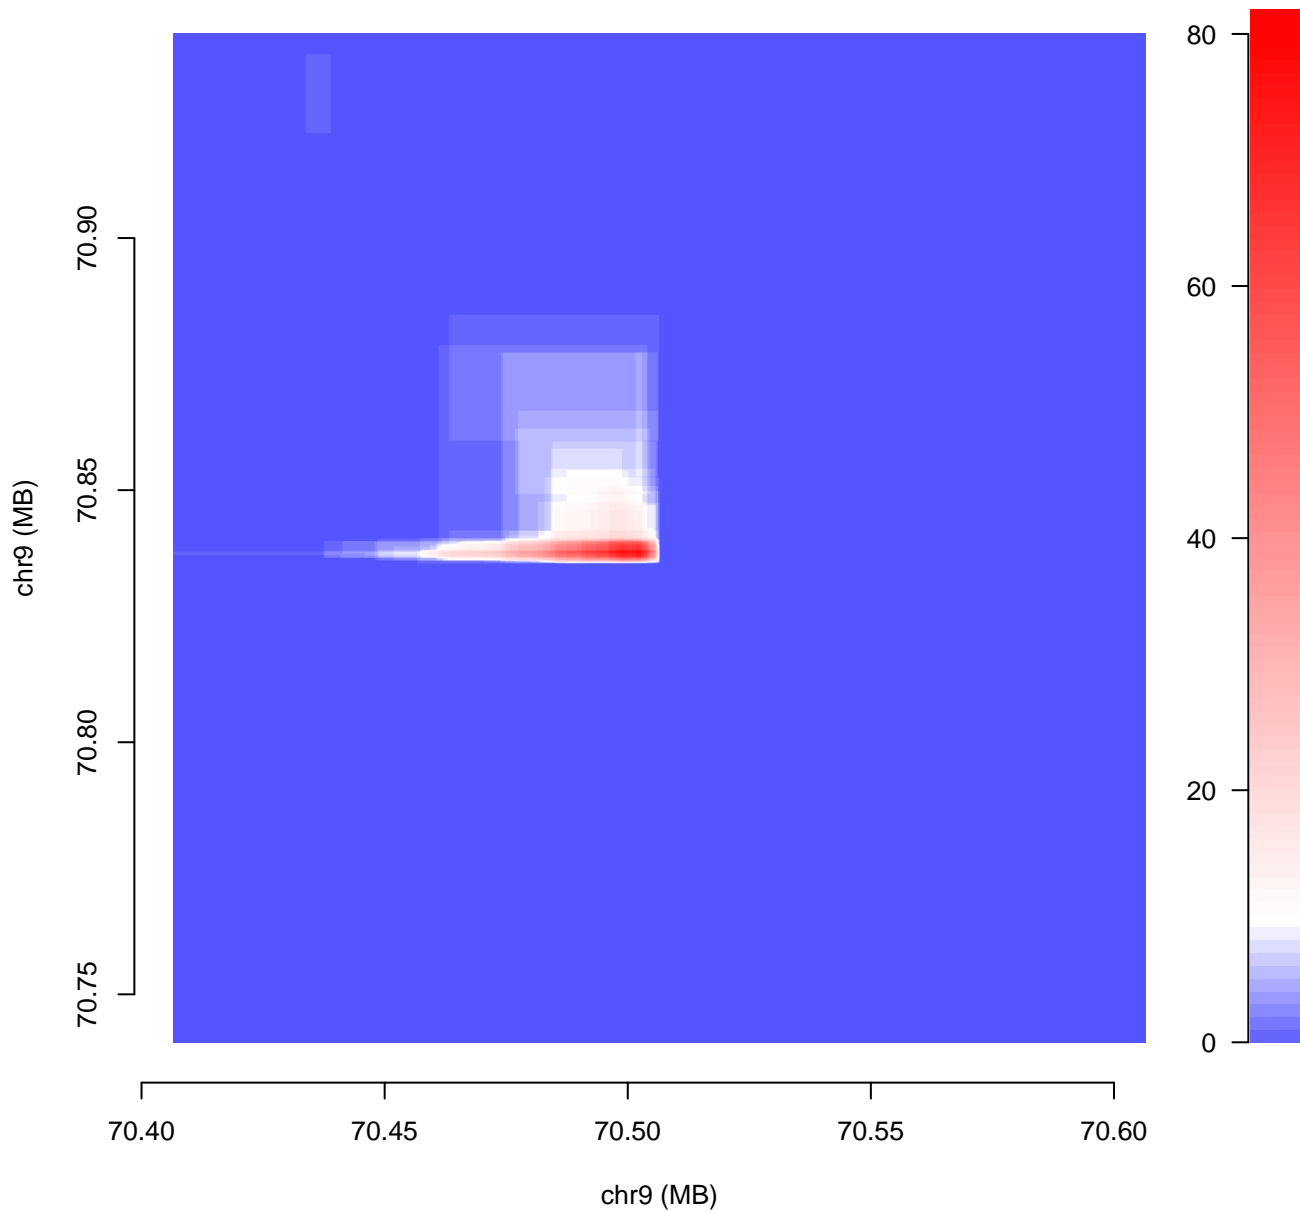

Supplement: Supplemental_Data.zip [file event_132.pdf › event_132.pdf]

Barcode

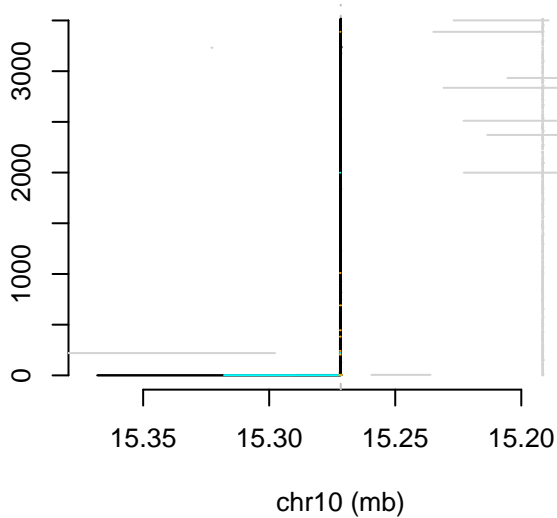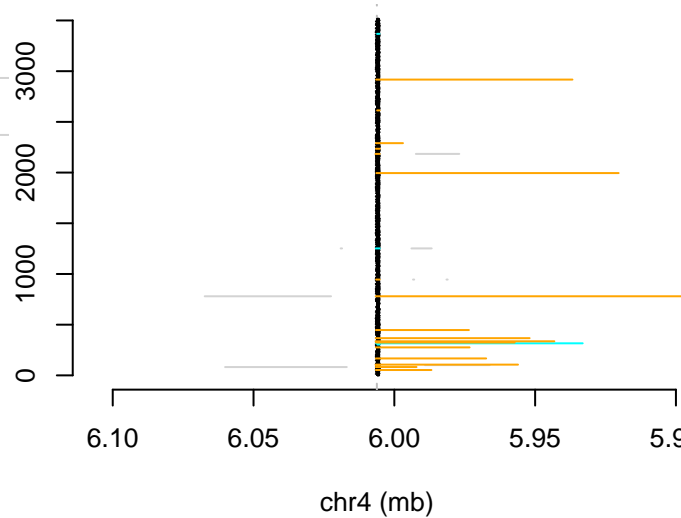

Copy number

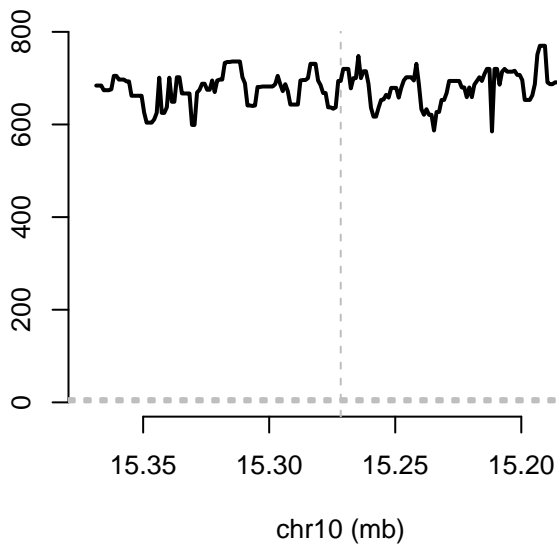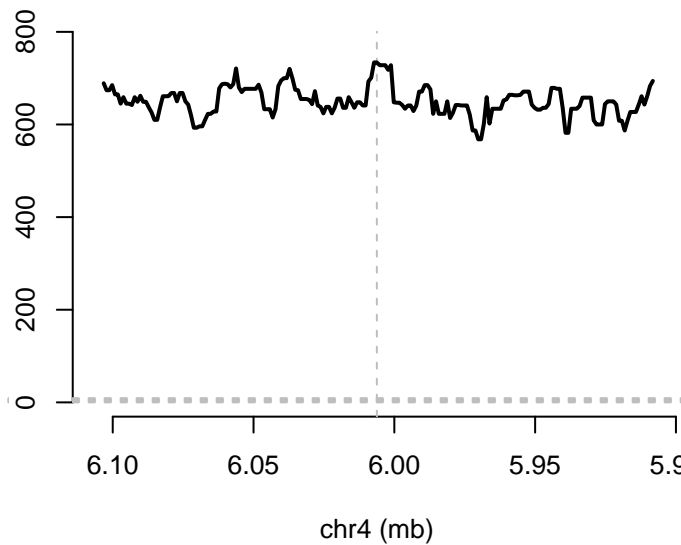

K562 chr4:6,006,200::chr10:15,271,618+-

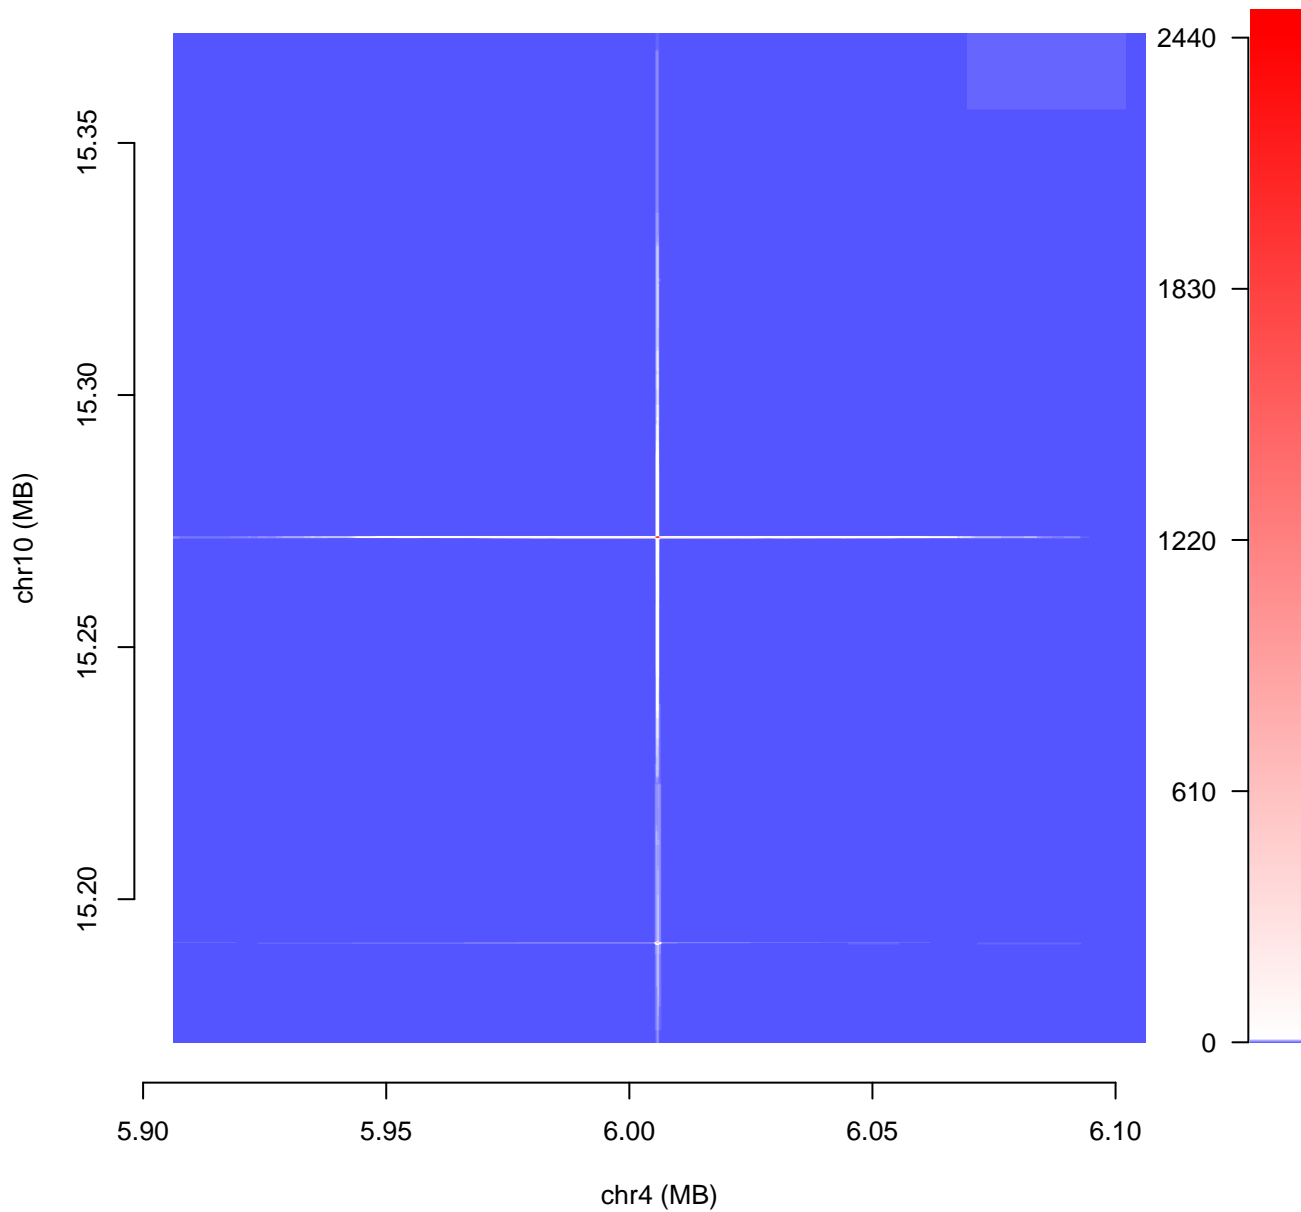

Supplement: Supplemental_Data.zip [file event_133.pdf › event_133.pdf]

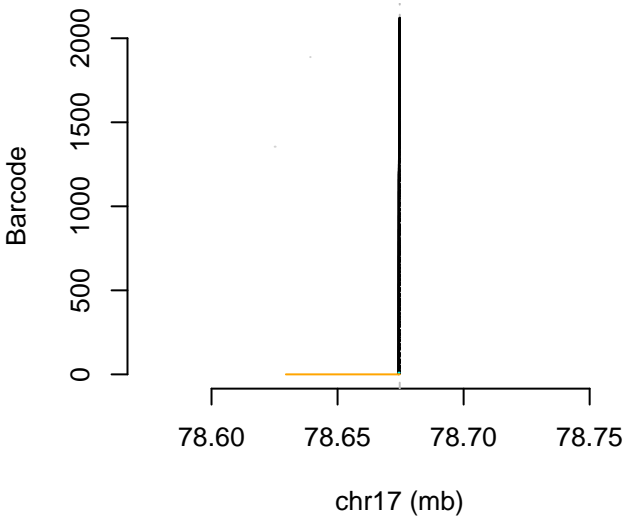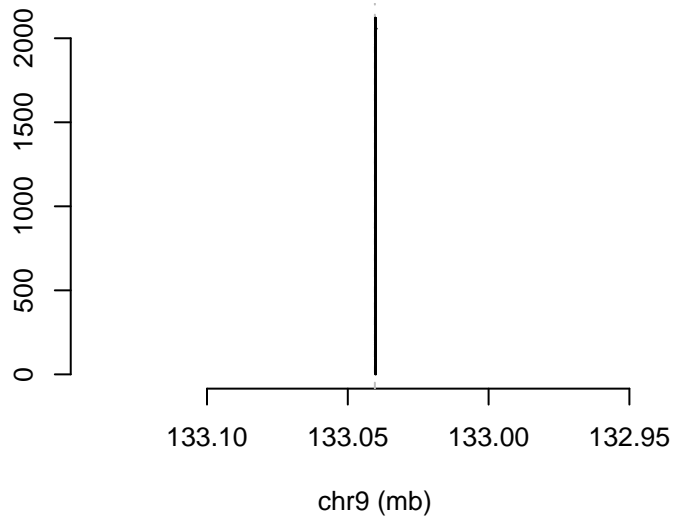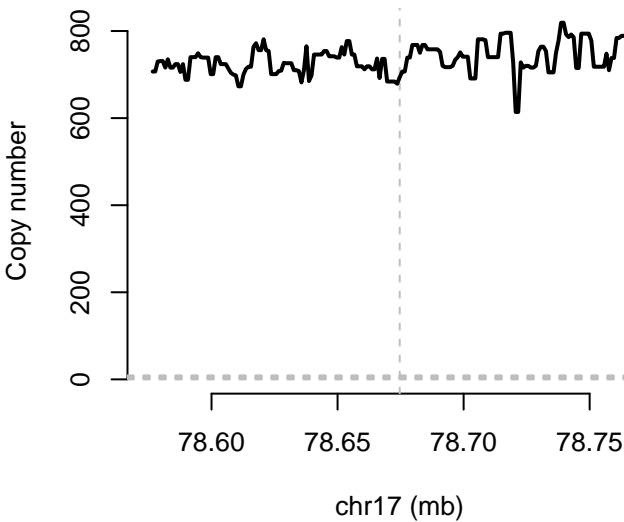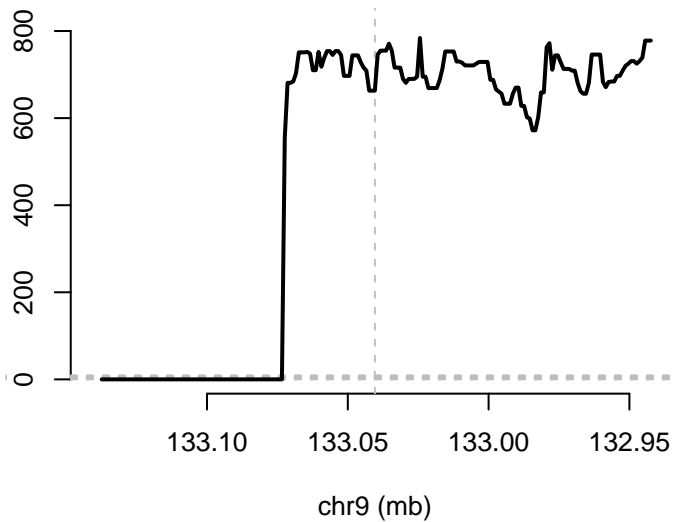

K562 chr17:78,674,661::chr9:133,040,382++

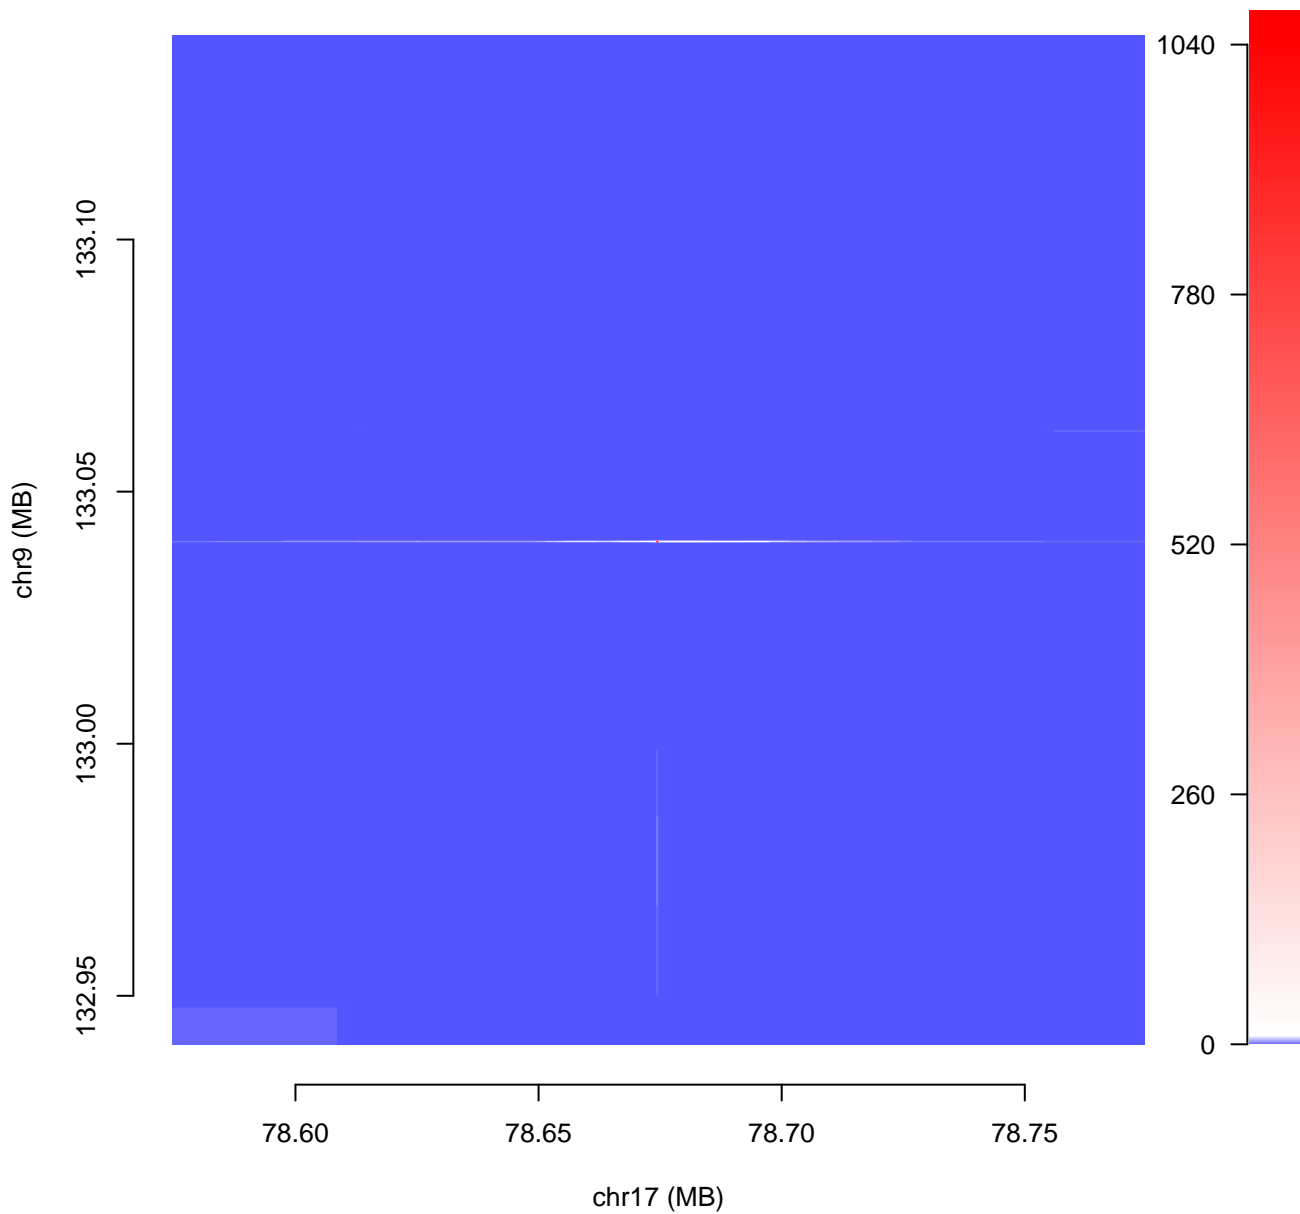

Supplement: Supplemental_Data.zip [file event_134.pdf › event_134.pdf]

Barcode

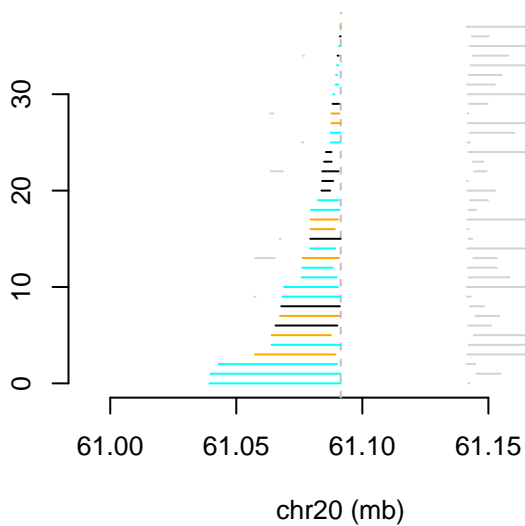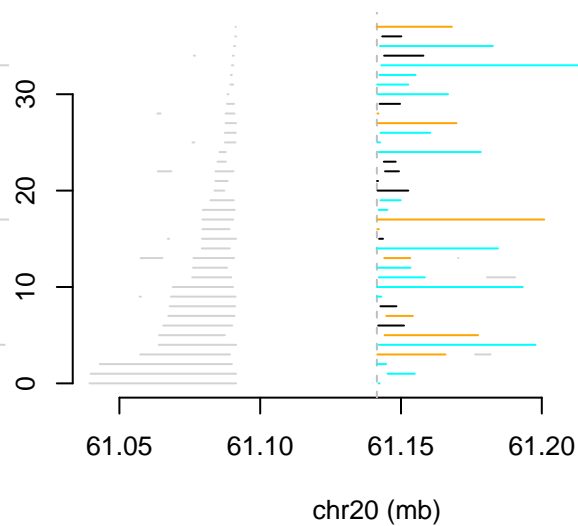

Copy number

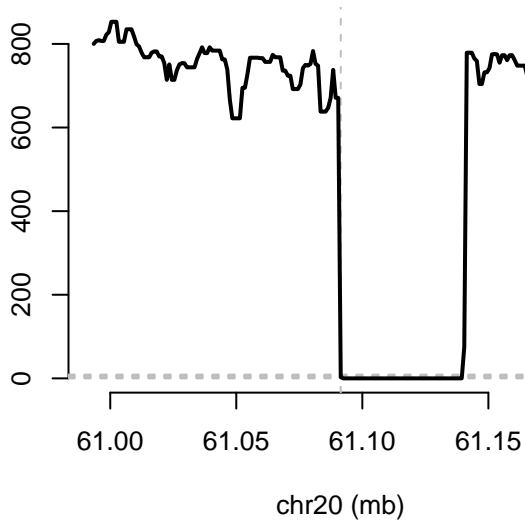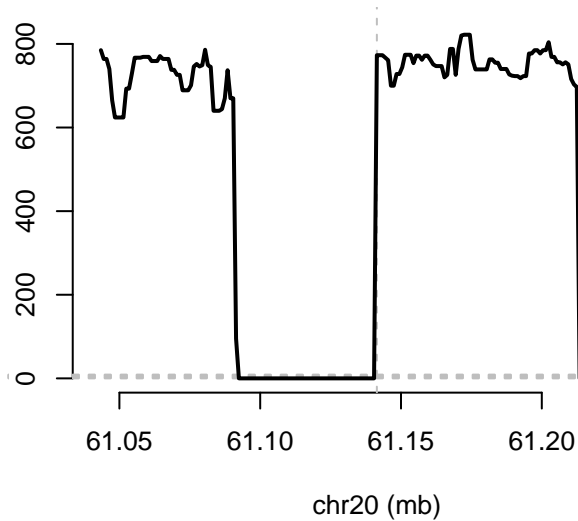

K562 chr20:61,141,433::chr20:61,091,437-+

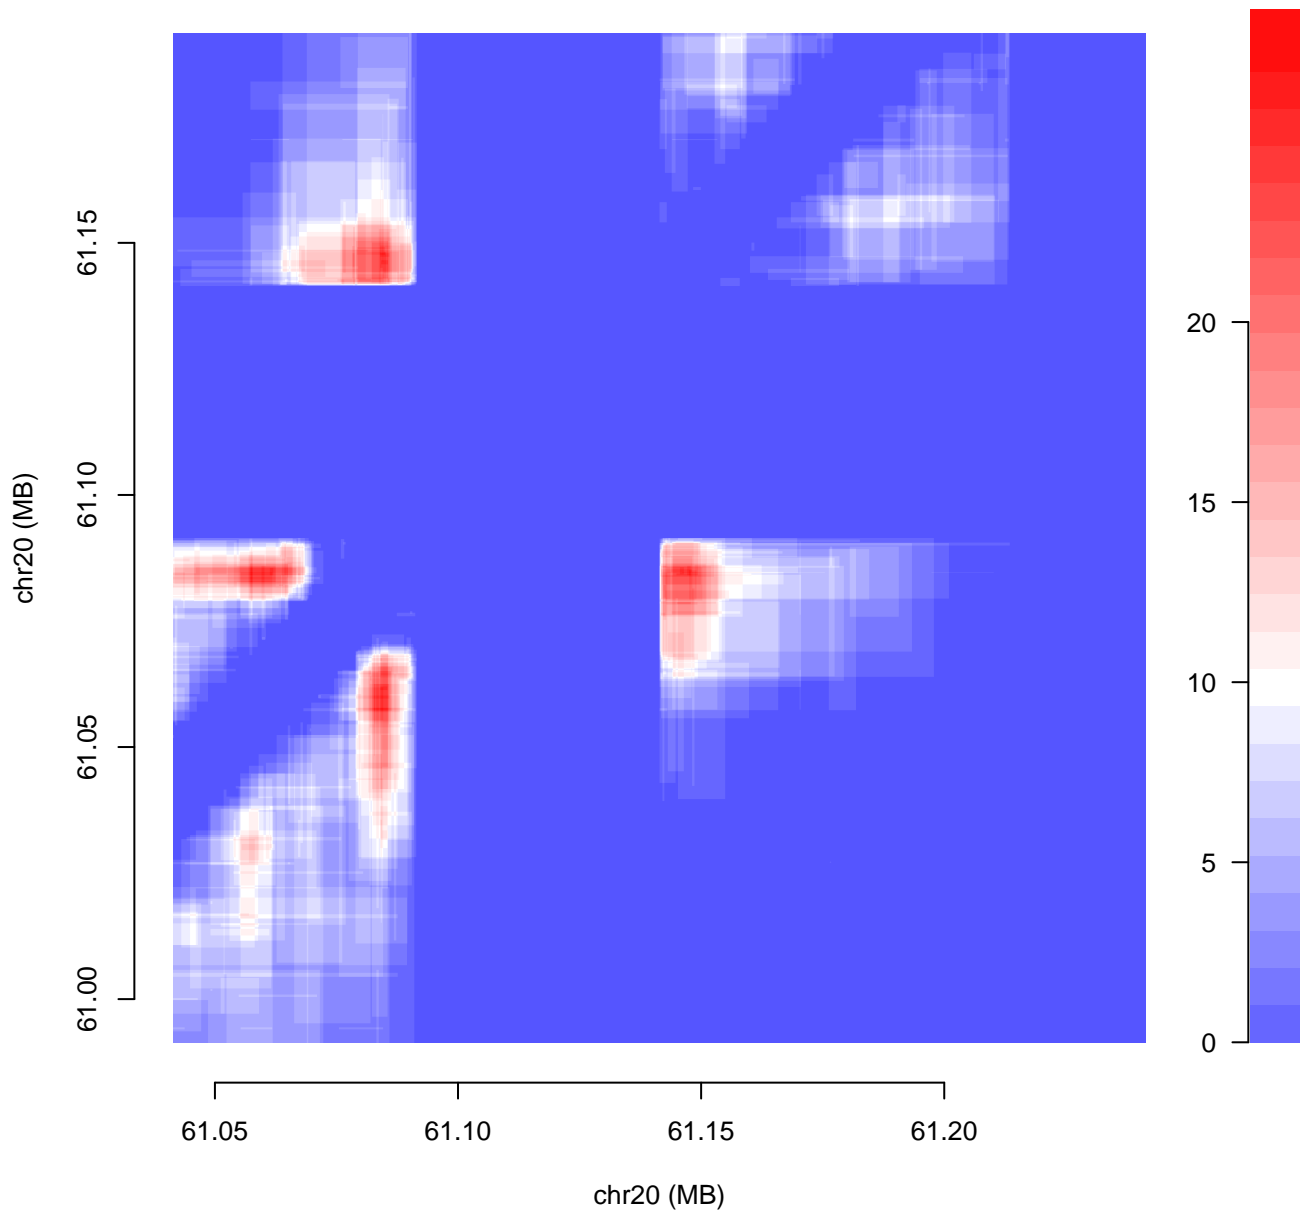

Supplement: Supplemental_Data.zip [file event_135.pdf › event_135.pdf]

Barcode

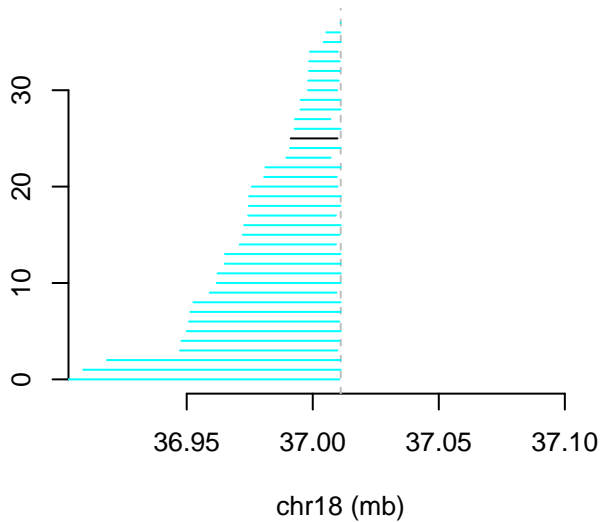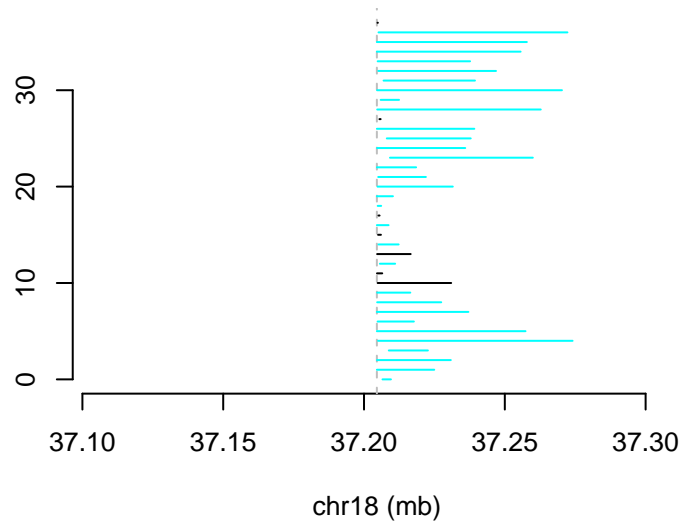

Copy number

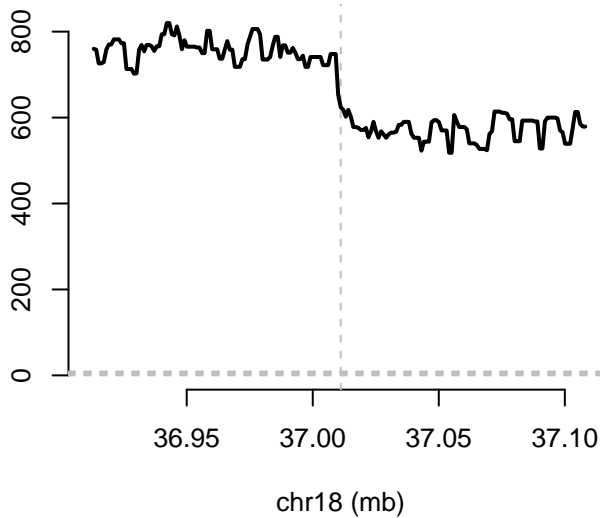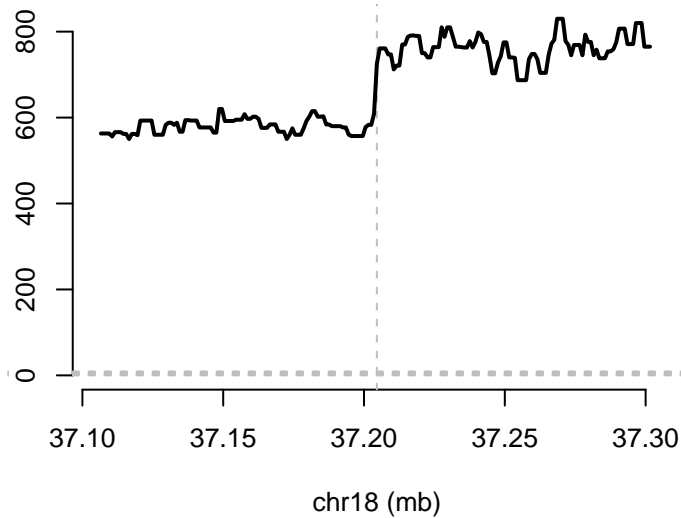

K562 chr18:37,011,106::chr18:37,204,565+-

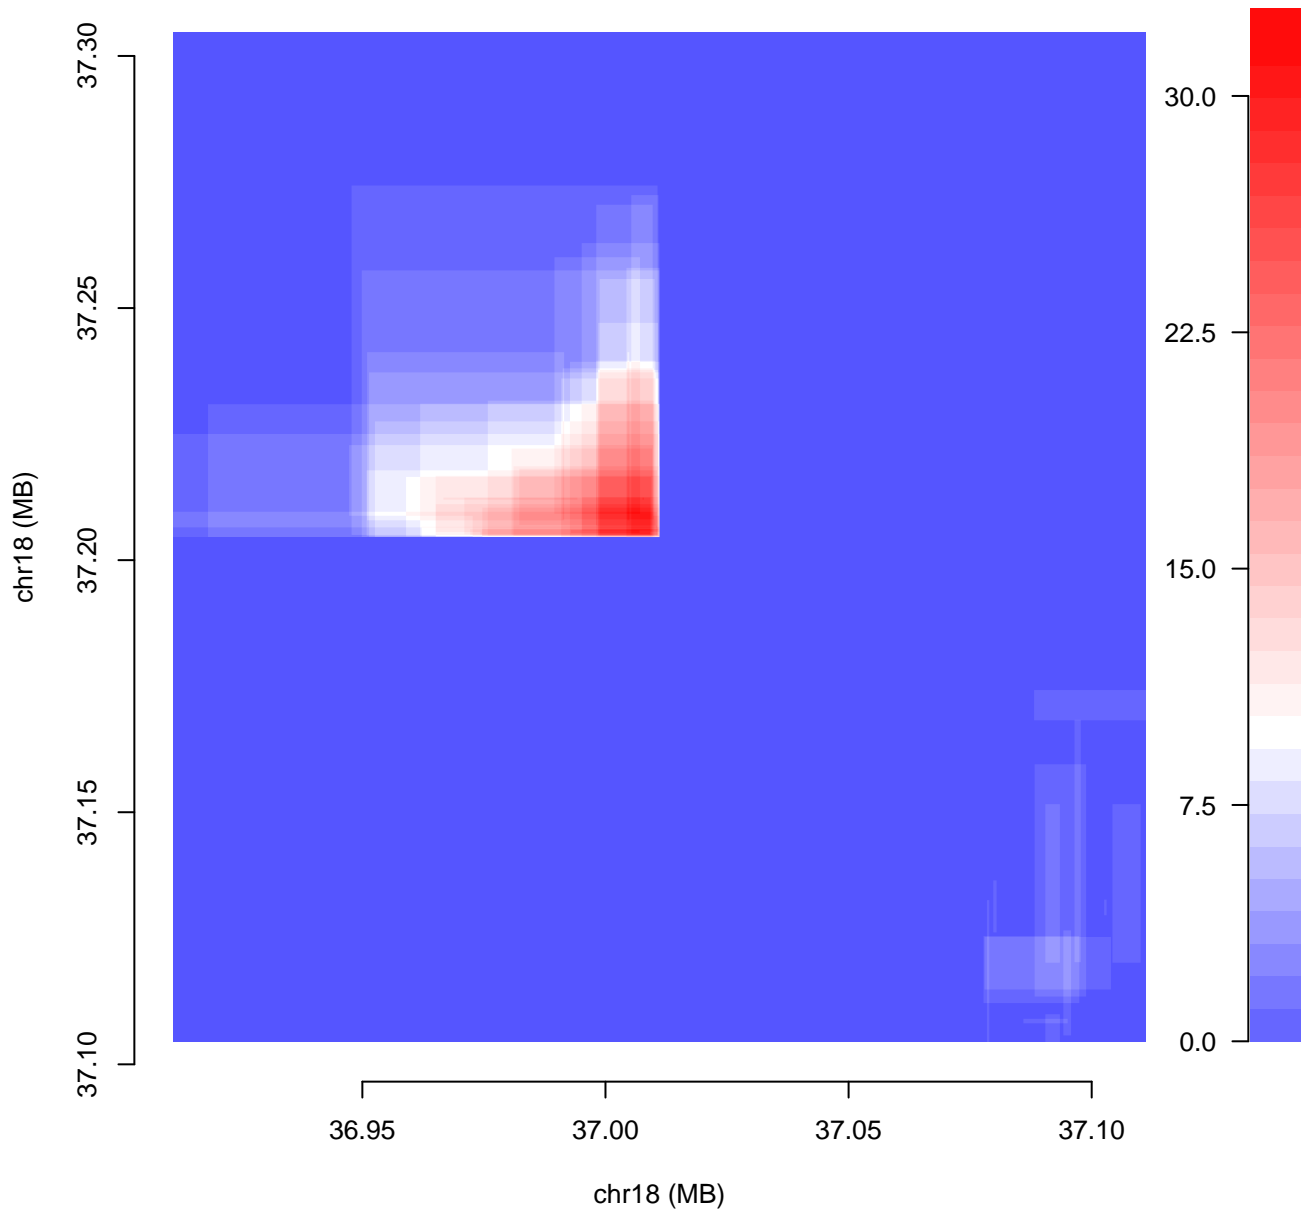

Supplement: Supplemental_Data.zip [file event_136.pdf › event_136.pdf]

Barcode

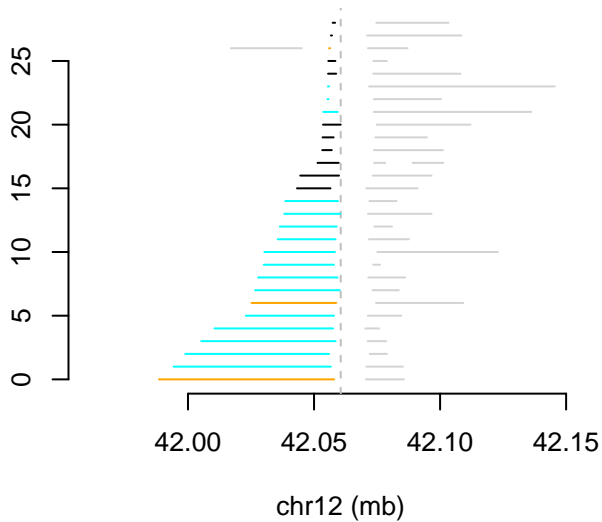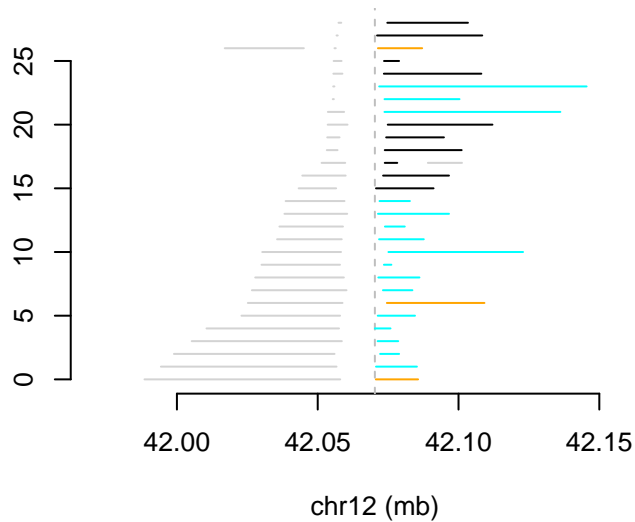

Copy number

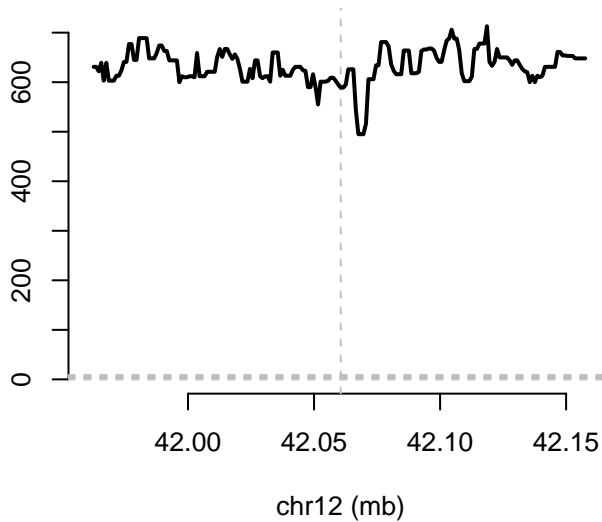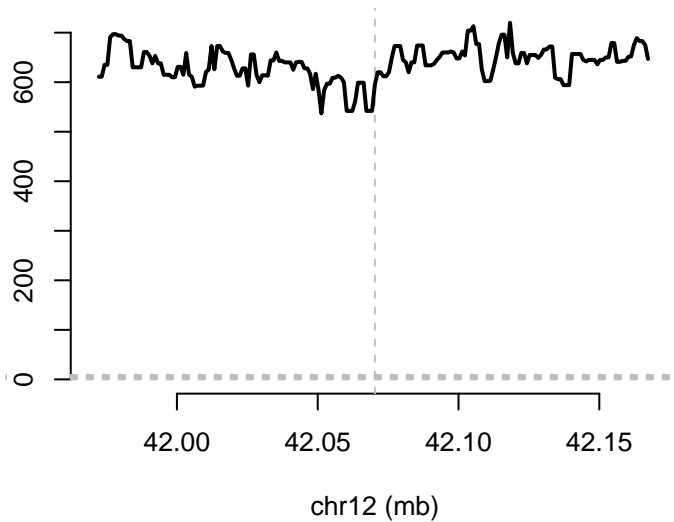

K562 chr12:42,060,592::chr12:42,070,298+-

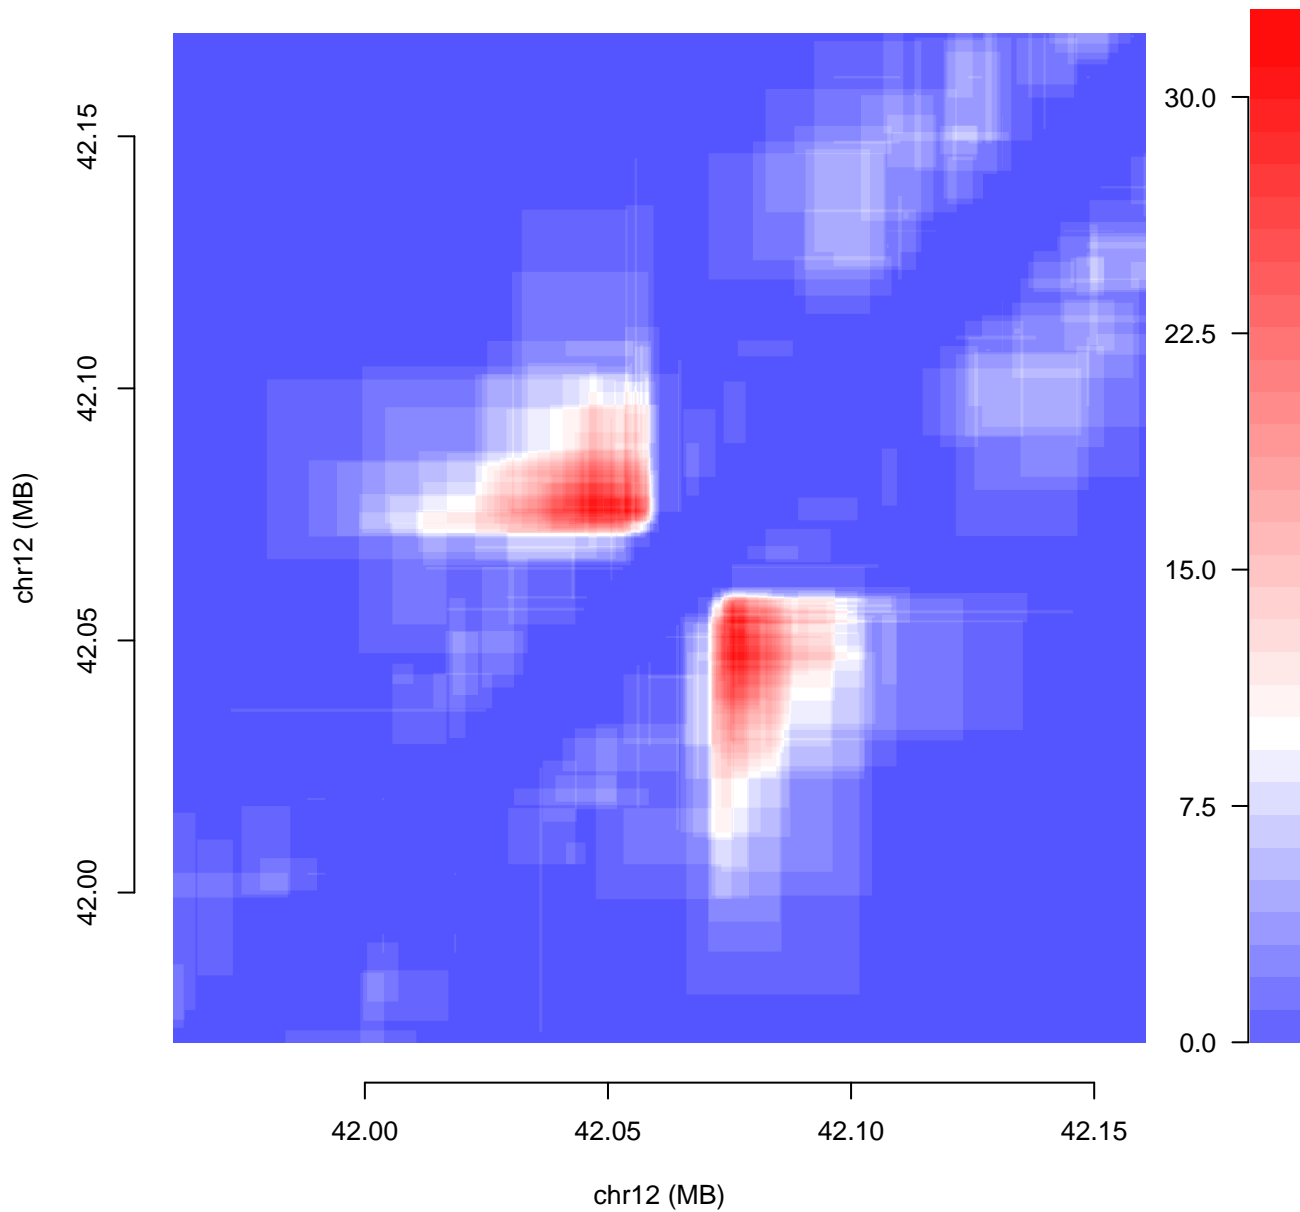

Supplement: Supplemental_Data.zip [file event_137.pdf › event_137.pdf]

Barcode

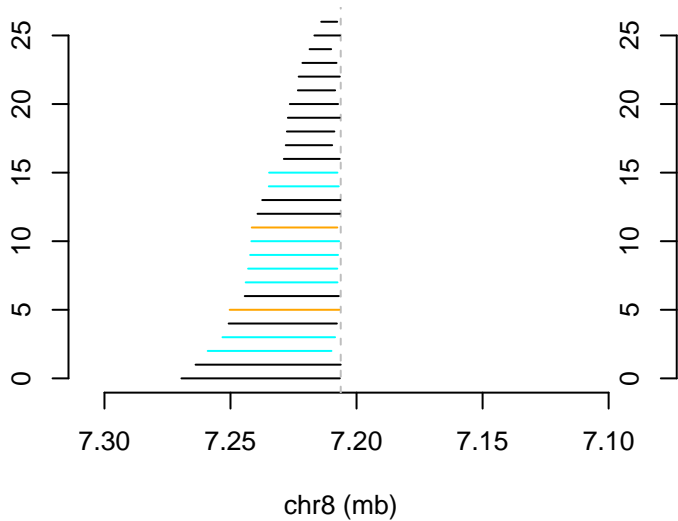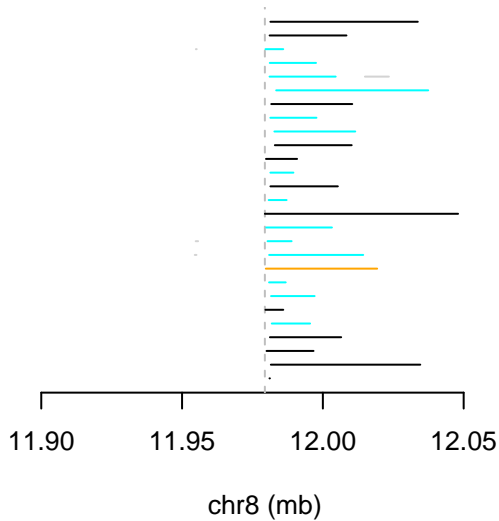

Copy number

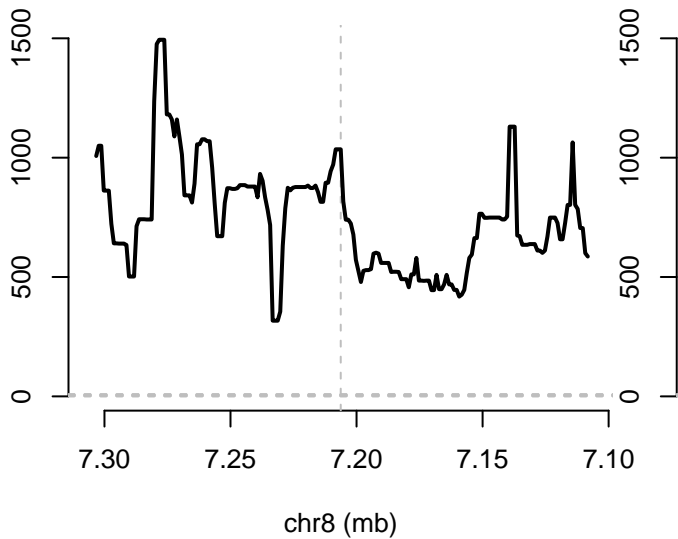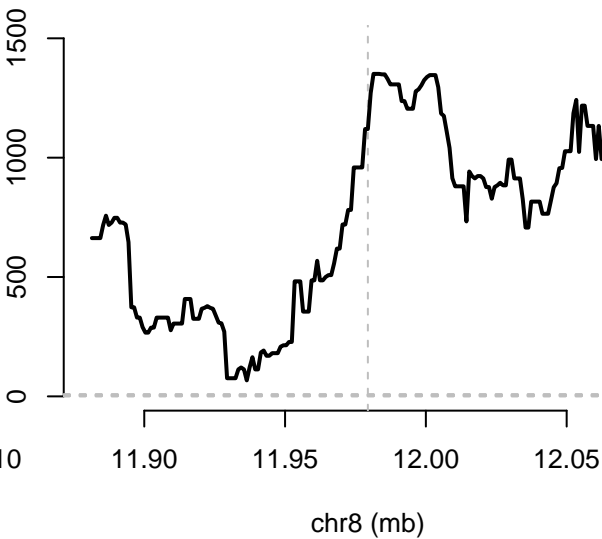

K562 chr8:7,206,267::chr8:11,979,407--

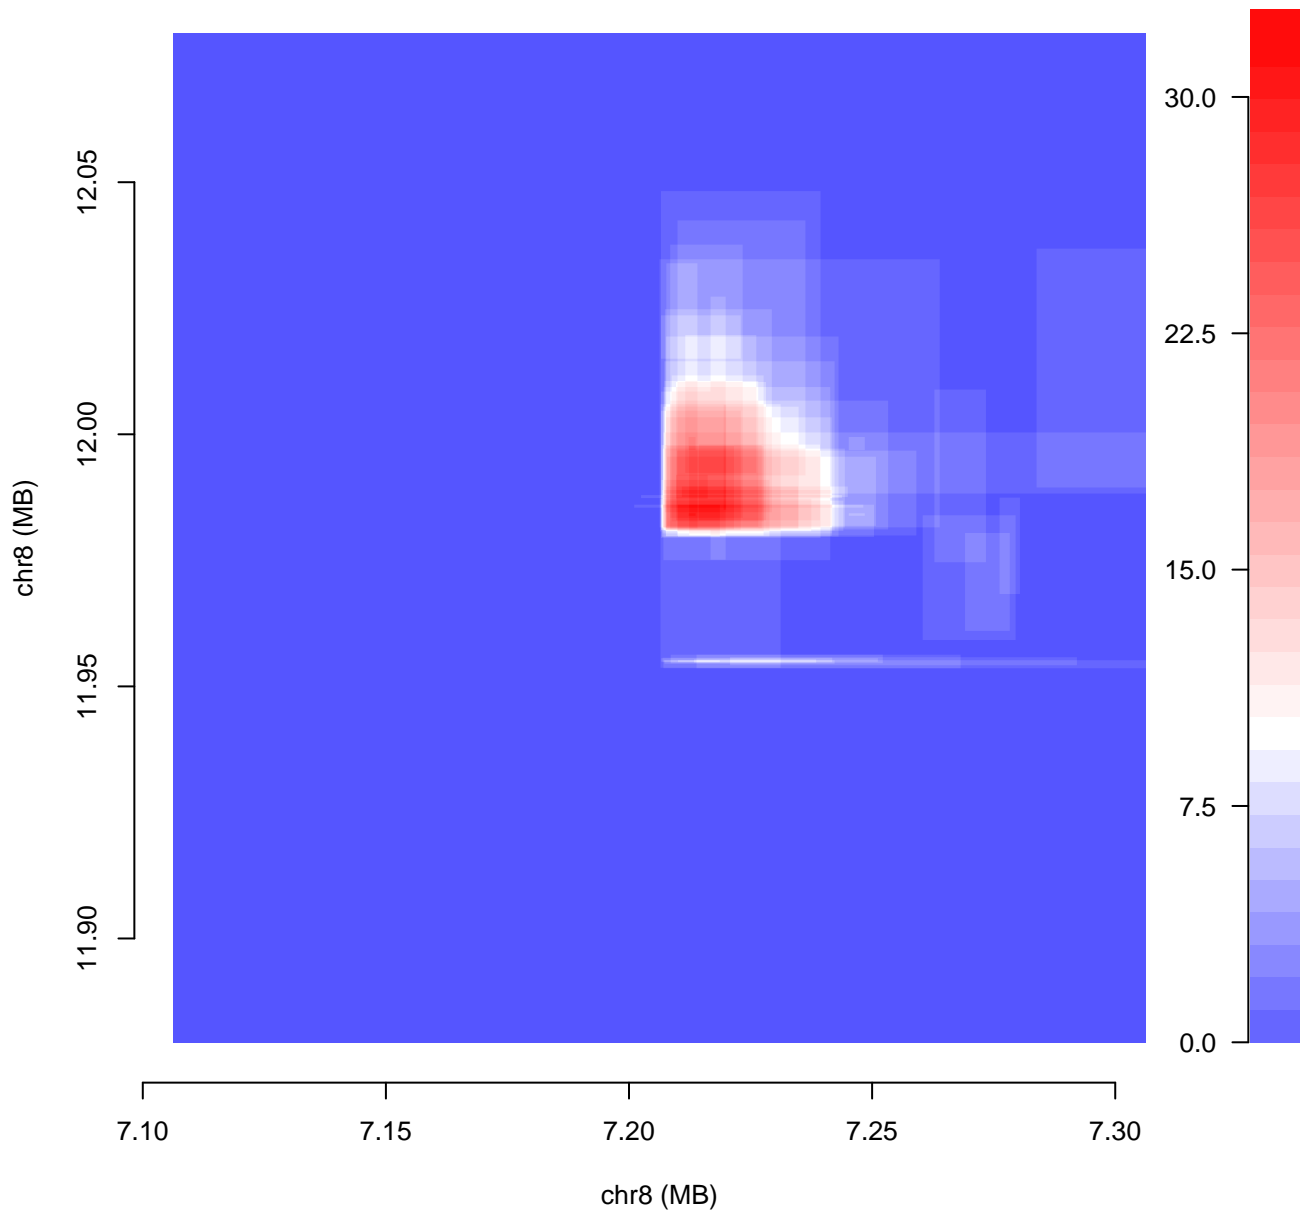

Supplement: Supplemental_Data.zip [file event_138.pdf › event_138.pdf]

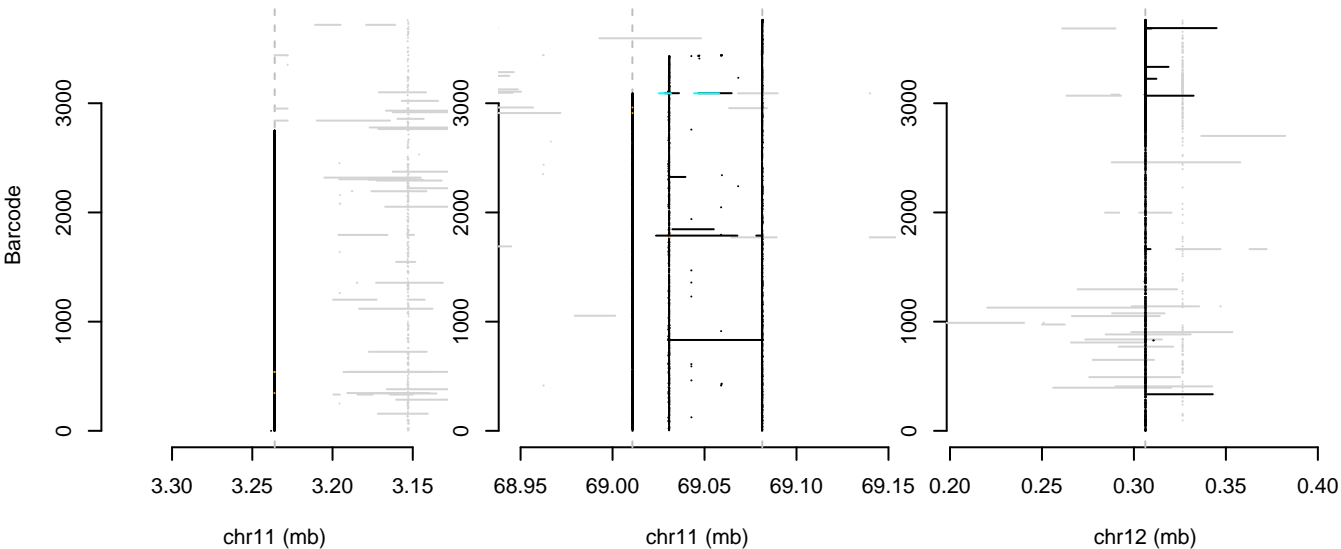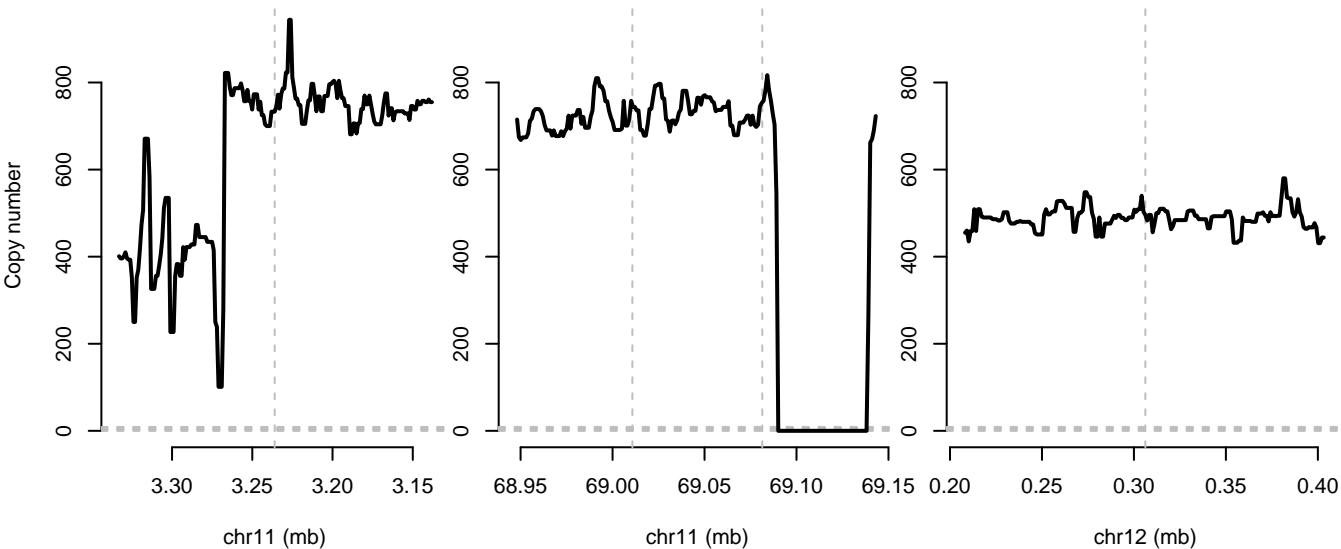

K562 chr12:306,205::chr11:69,081,397-+

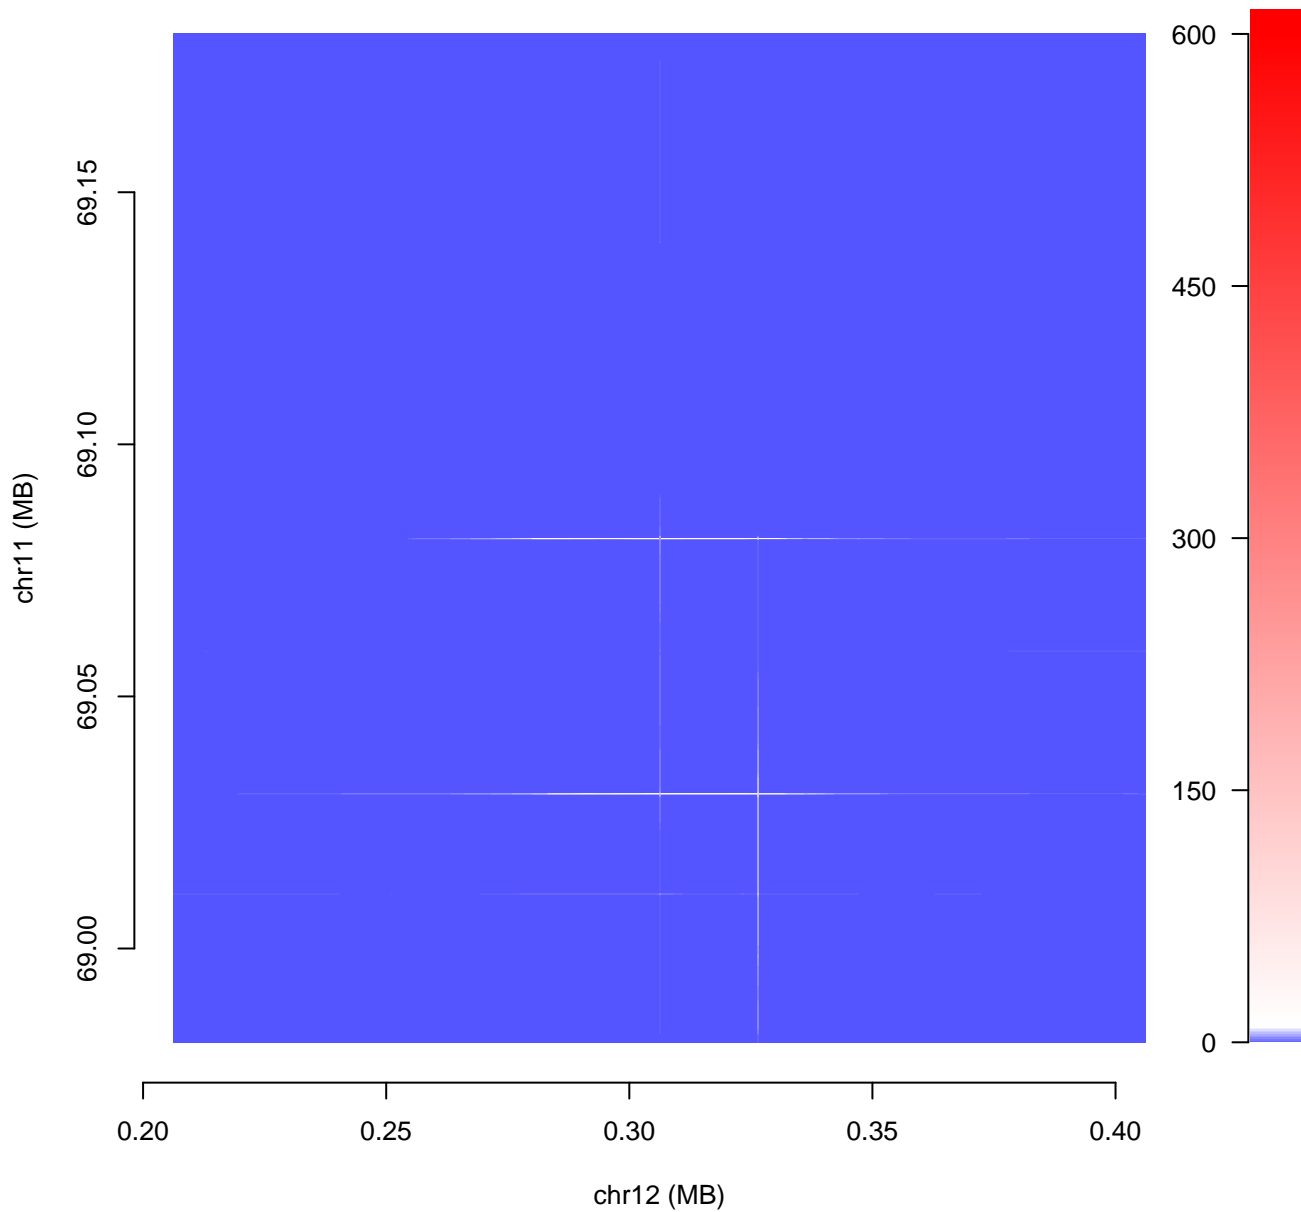

**K562 chr11:69,081,397::chr11:69,030,627+-**

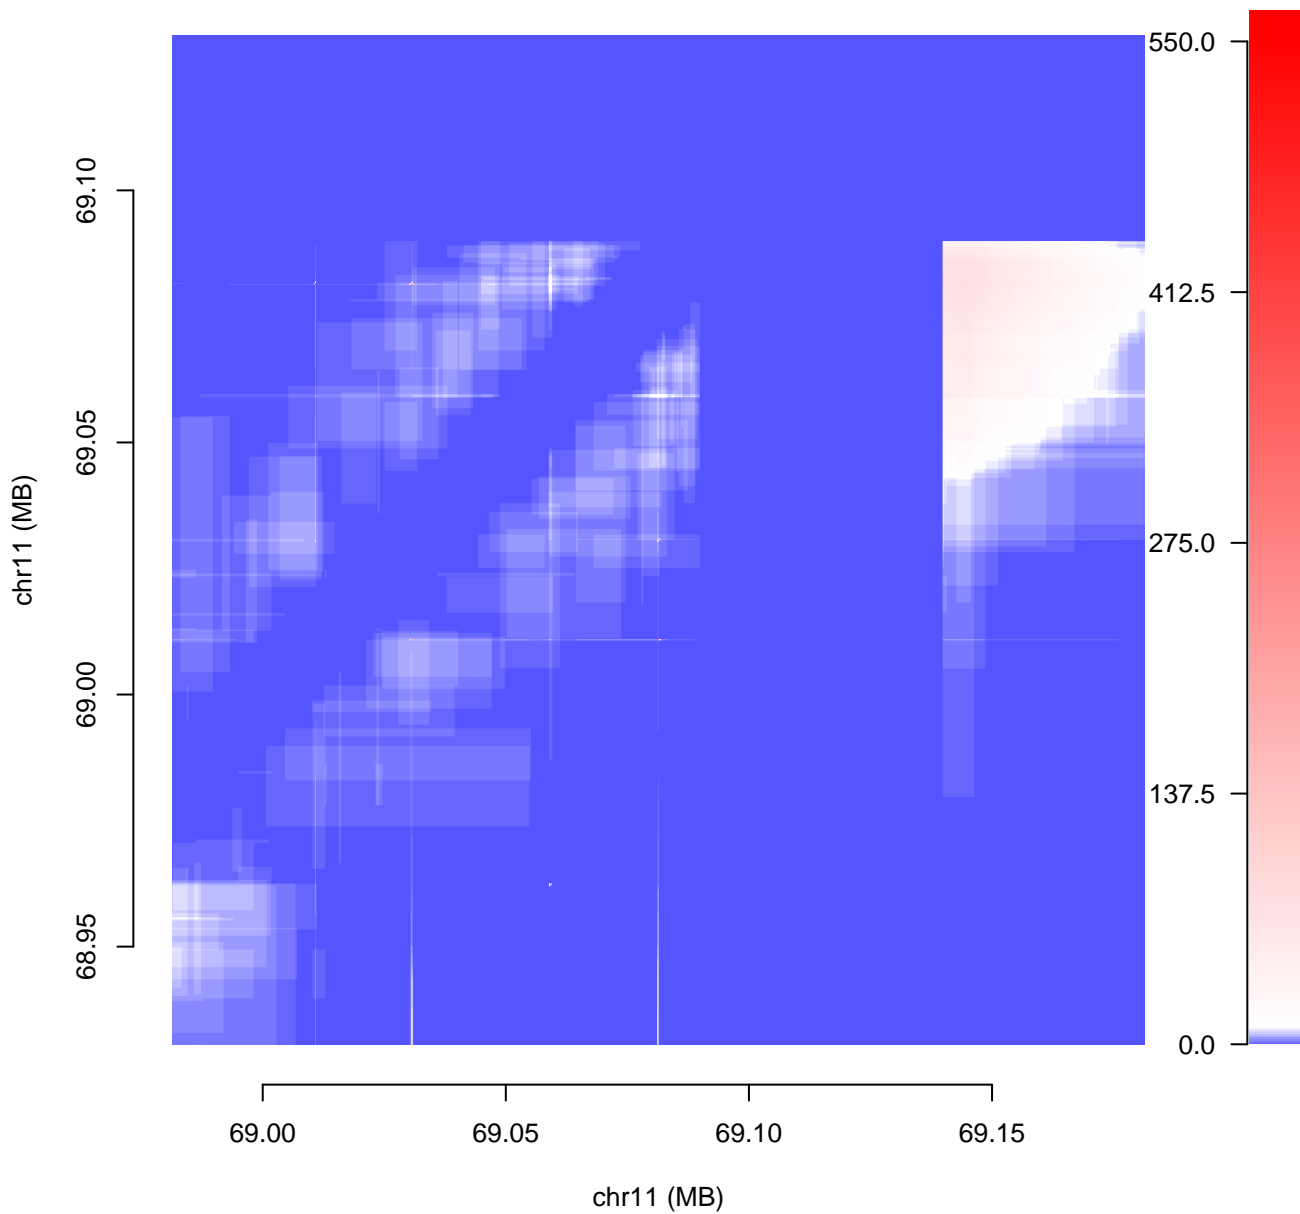

K562 chr11:69,081,397::chr11:69,010,790+-

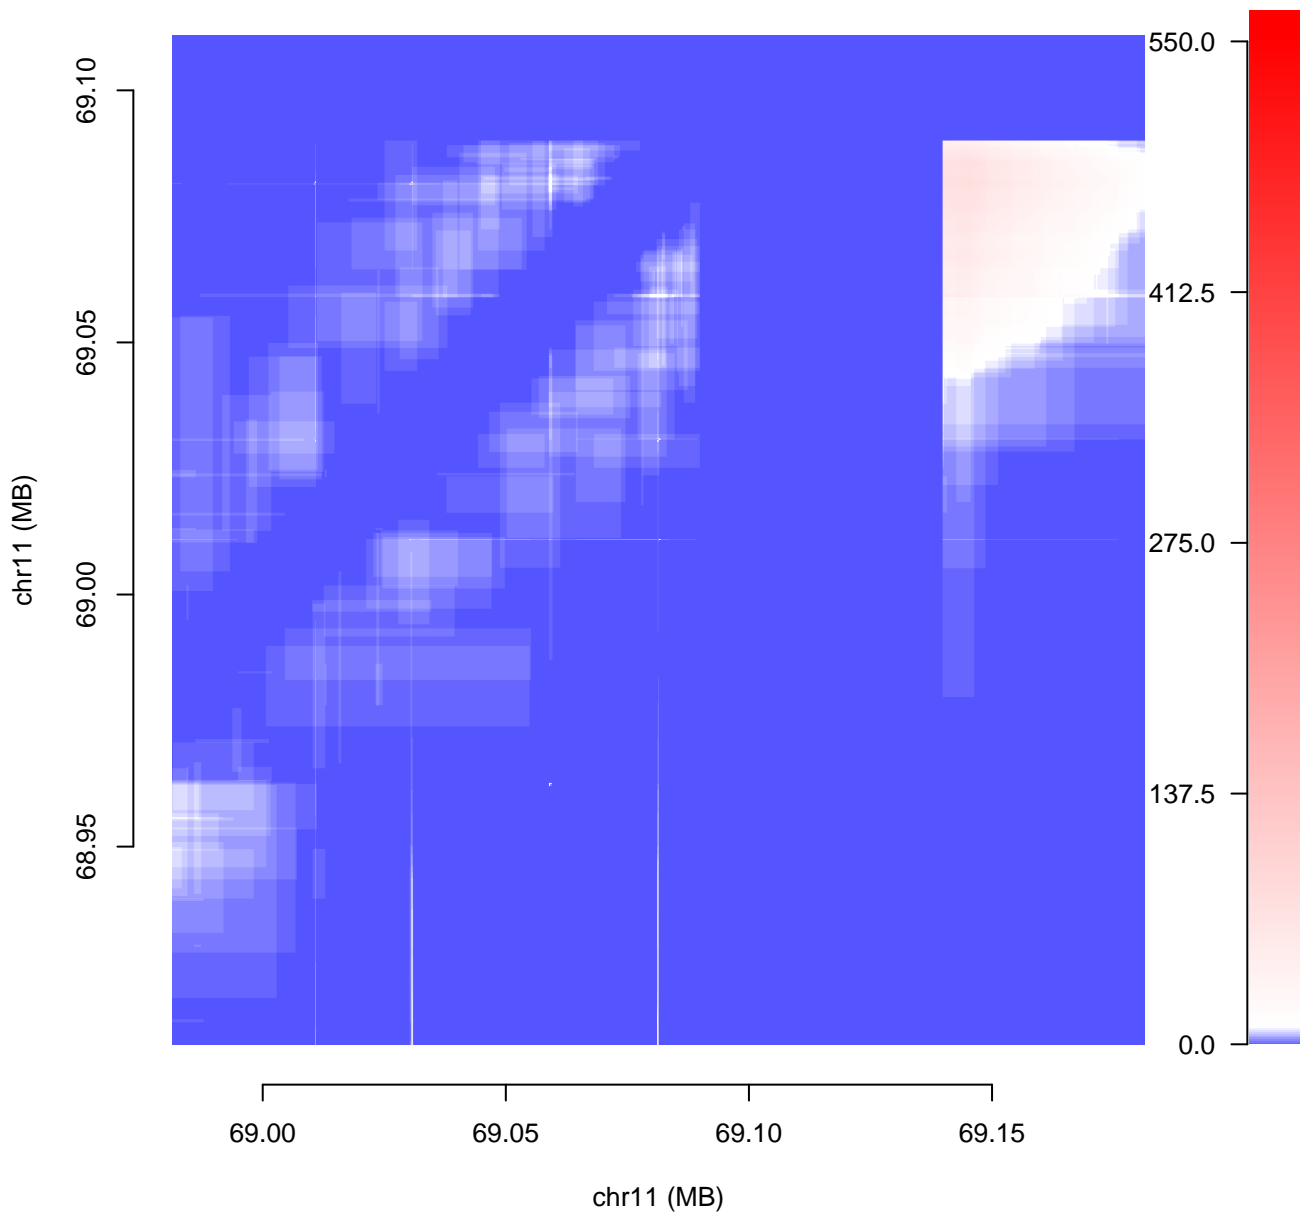

K562 chr11:3,236,048::chr11:69,010,790--

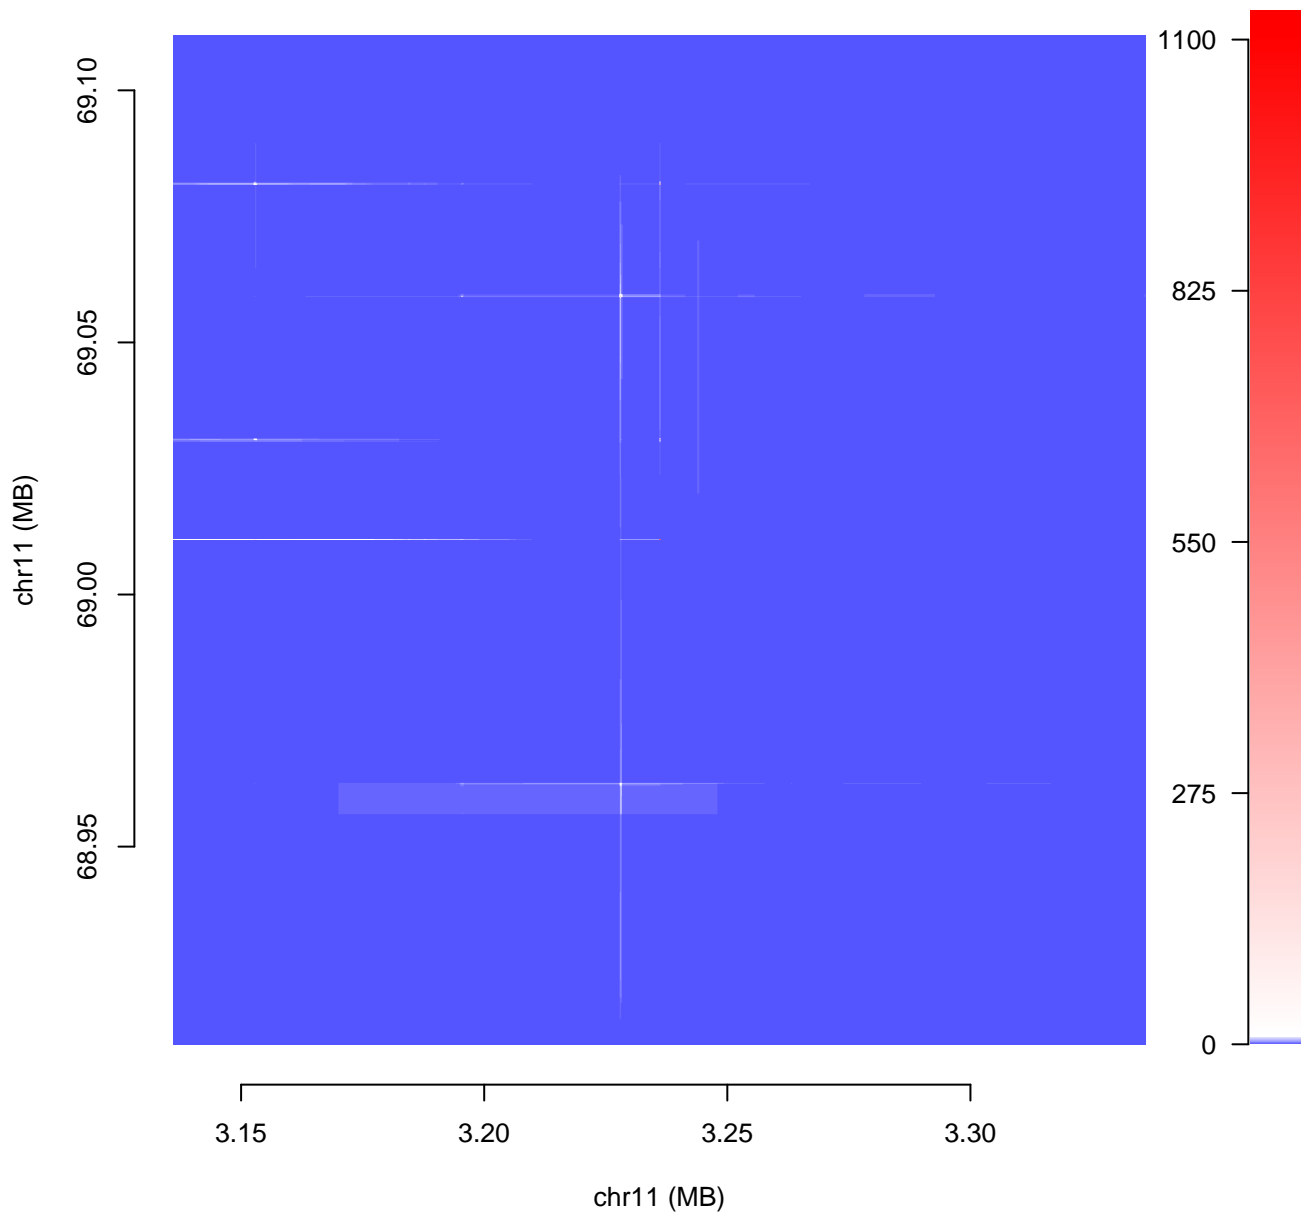

K562 chr11:69,030,627::chr12:326,366--

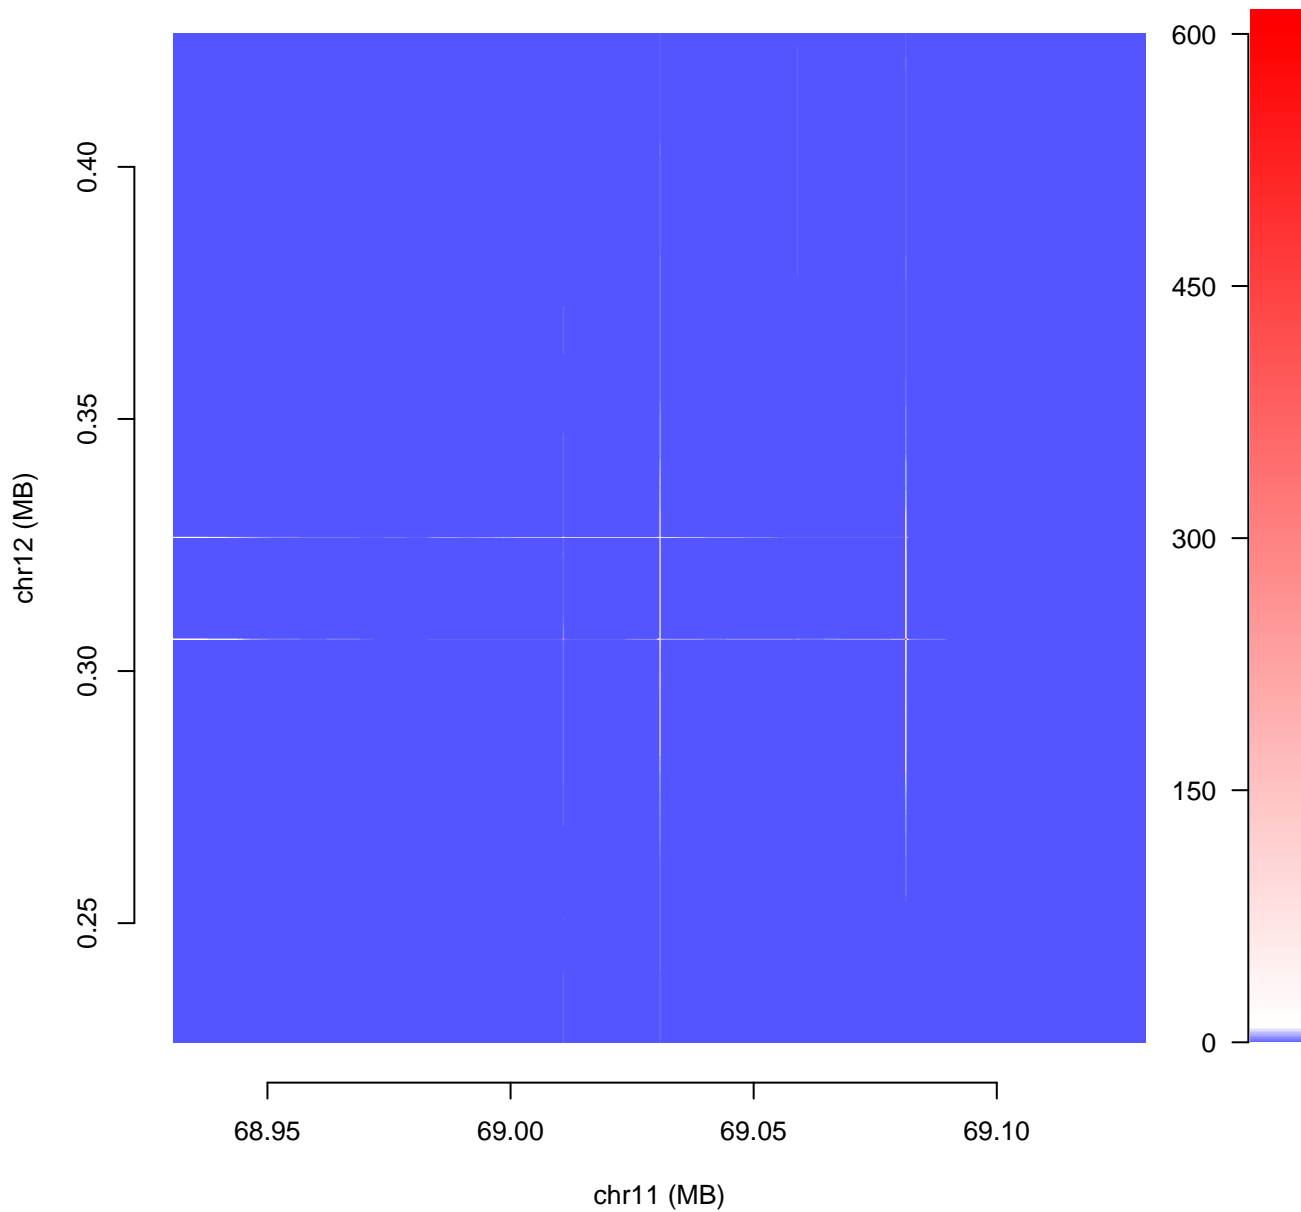

Supplement: Supplemental_Data.zip [file event_139.pdf › event_139.pdf]

Barcode

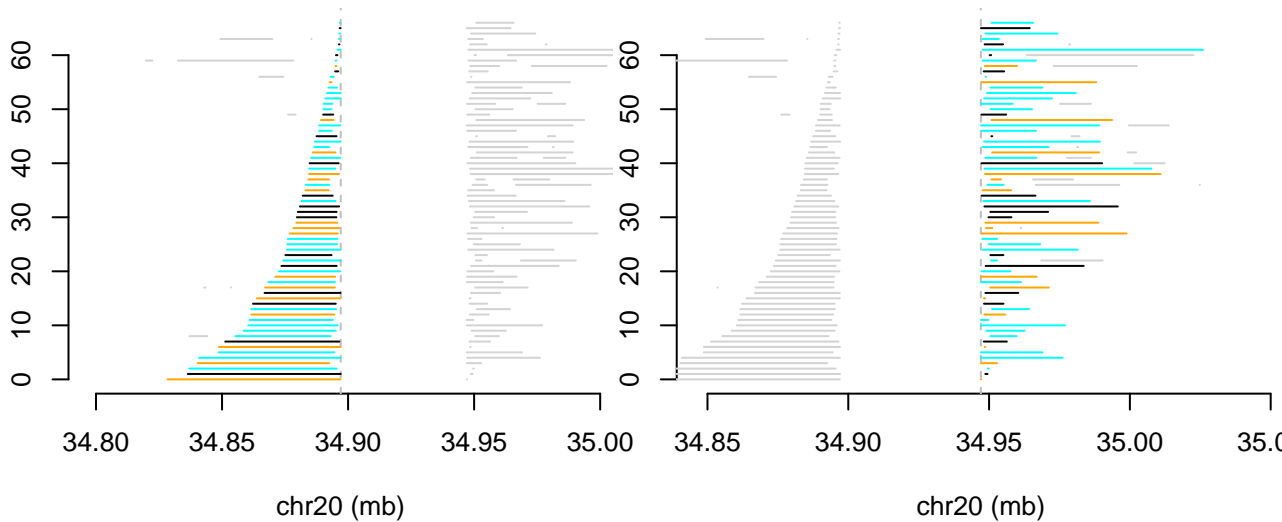

Copy number

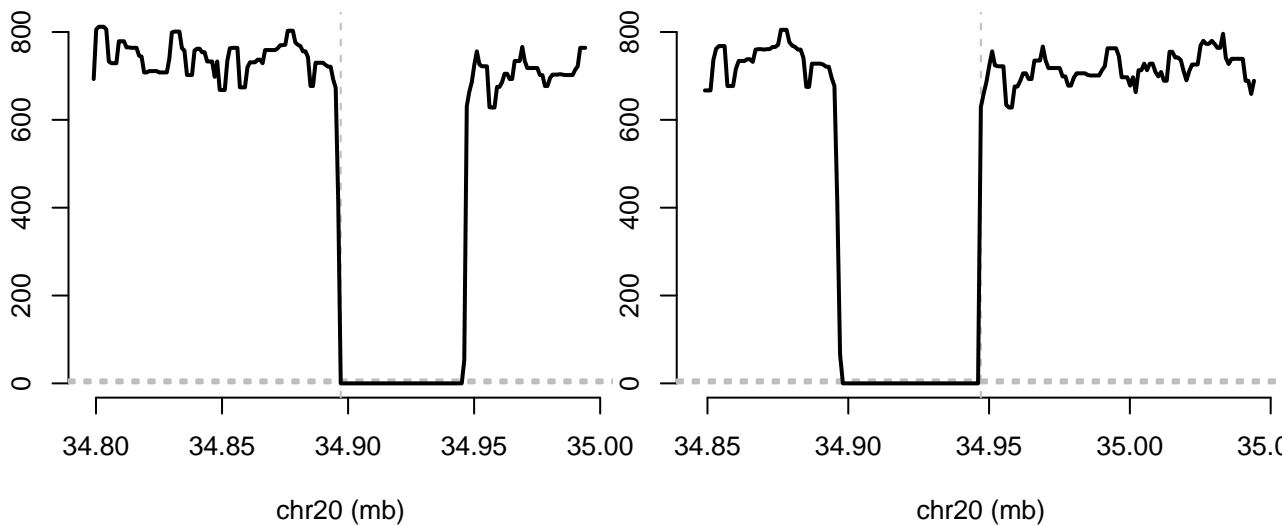

K562 chr20:34,897,087::chr20:34,947,083+-

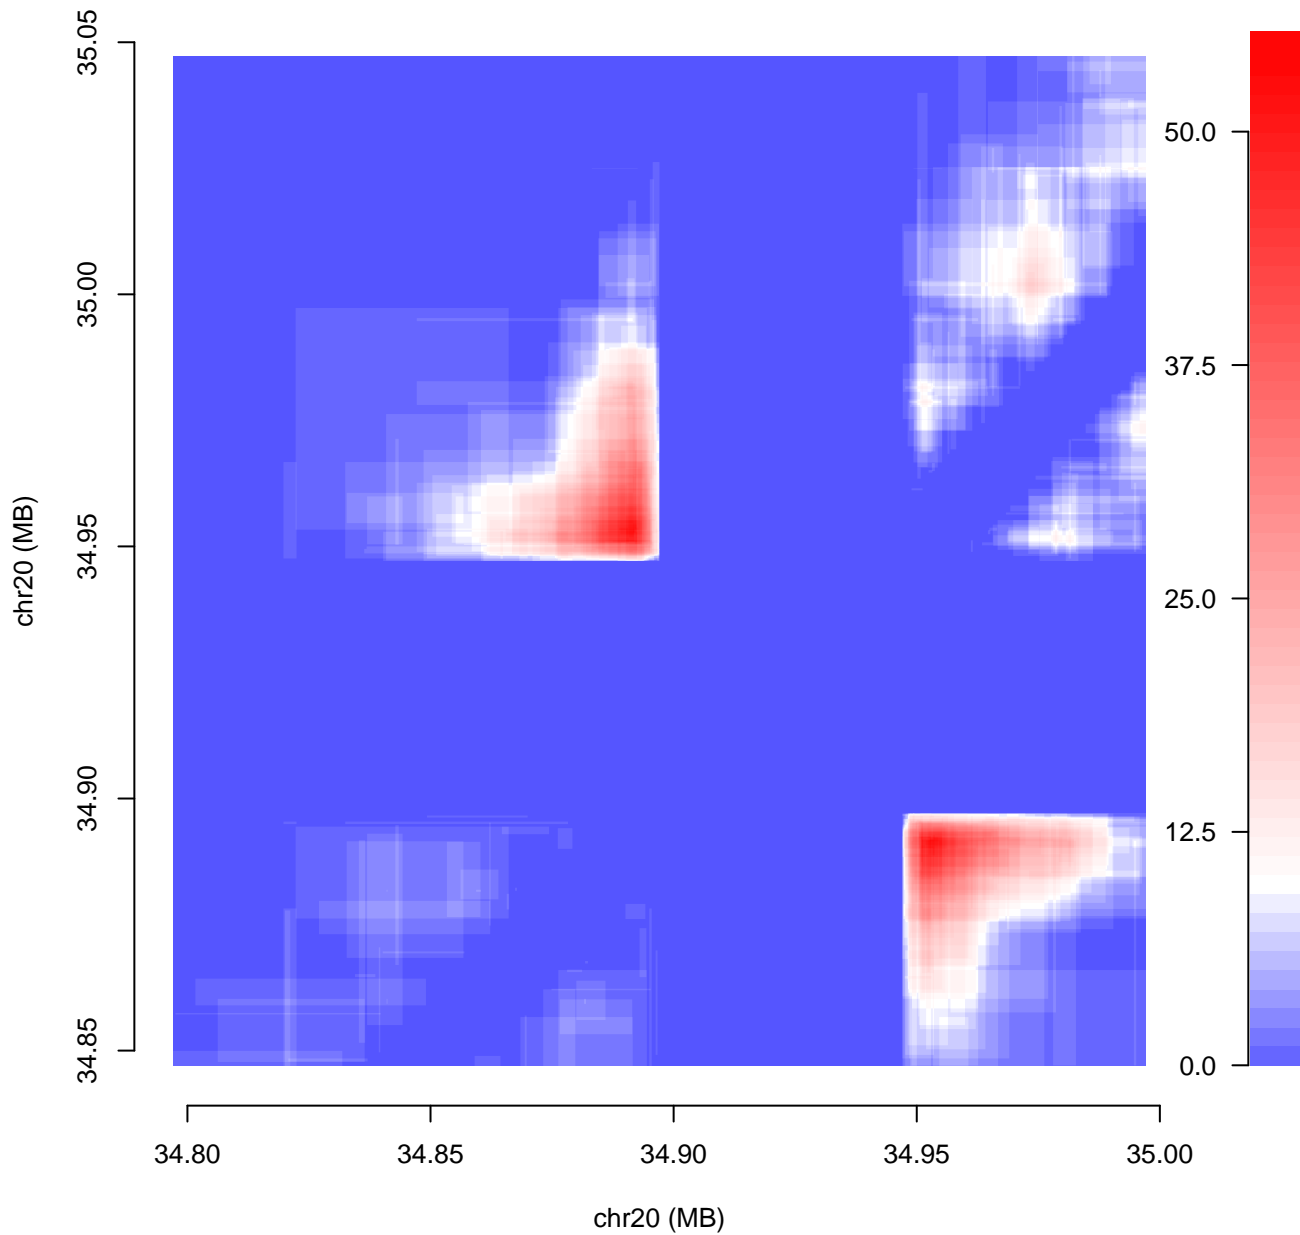

Supplement: Supplemental_Data.zip [file event_14.pdf › event_14.pdf]

Barcode

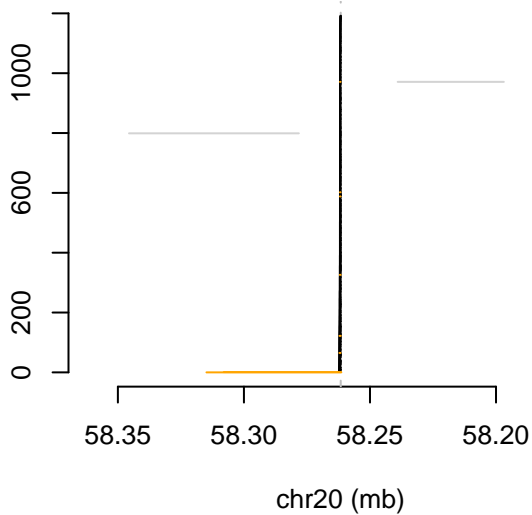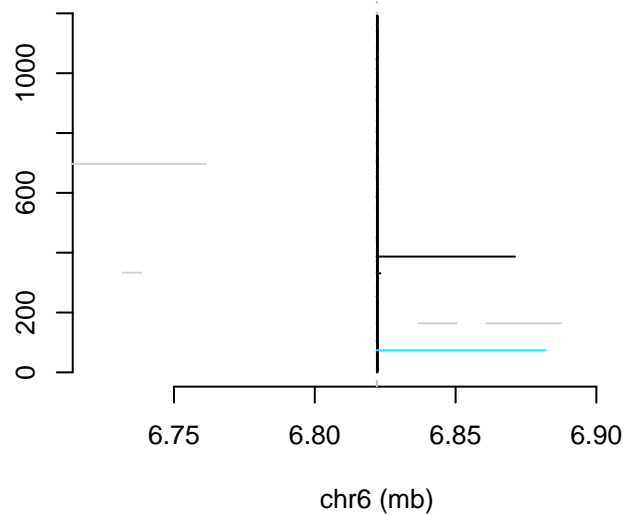

Copy number

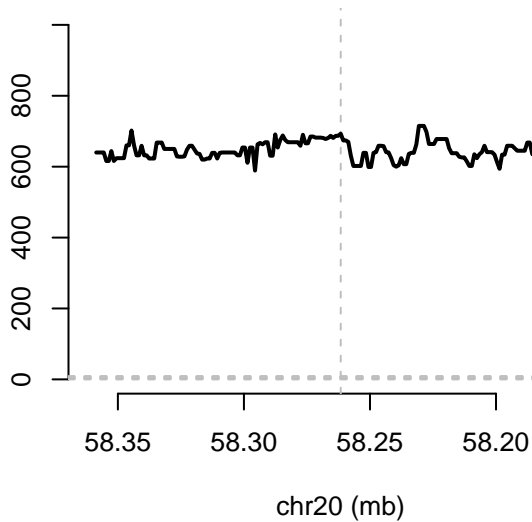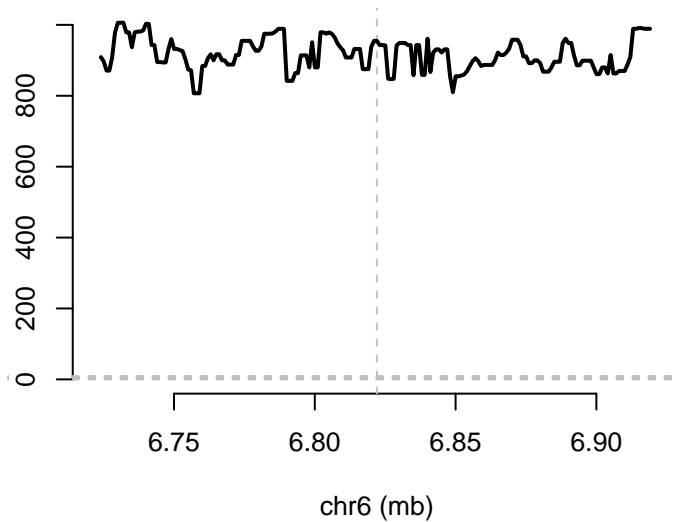

K562 chr20:58,261,598::chr6:6,822,049--

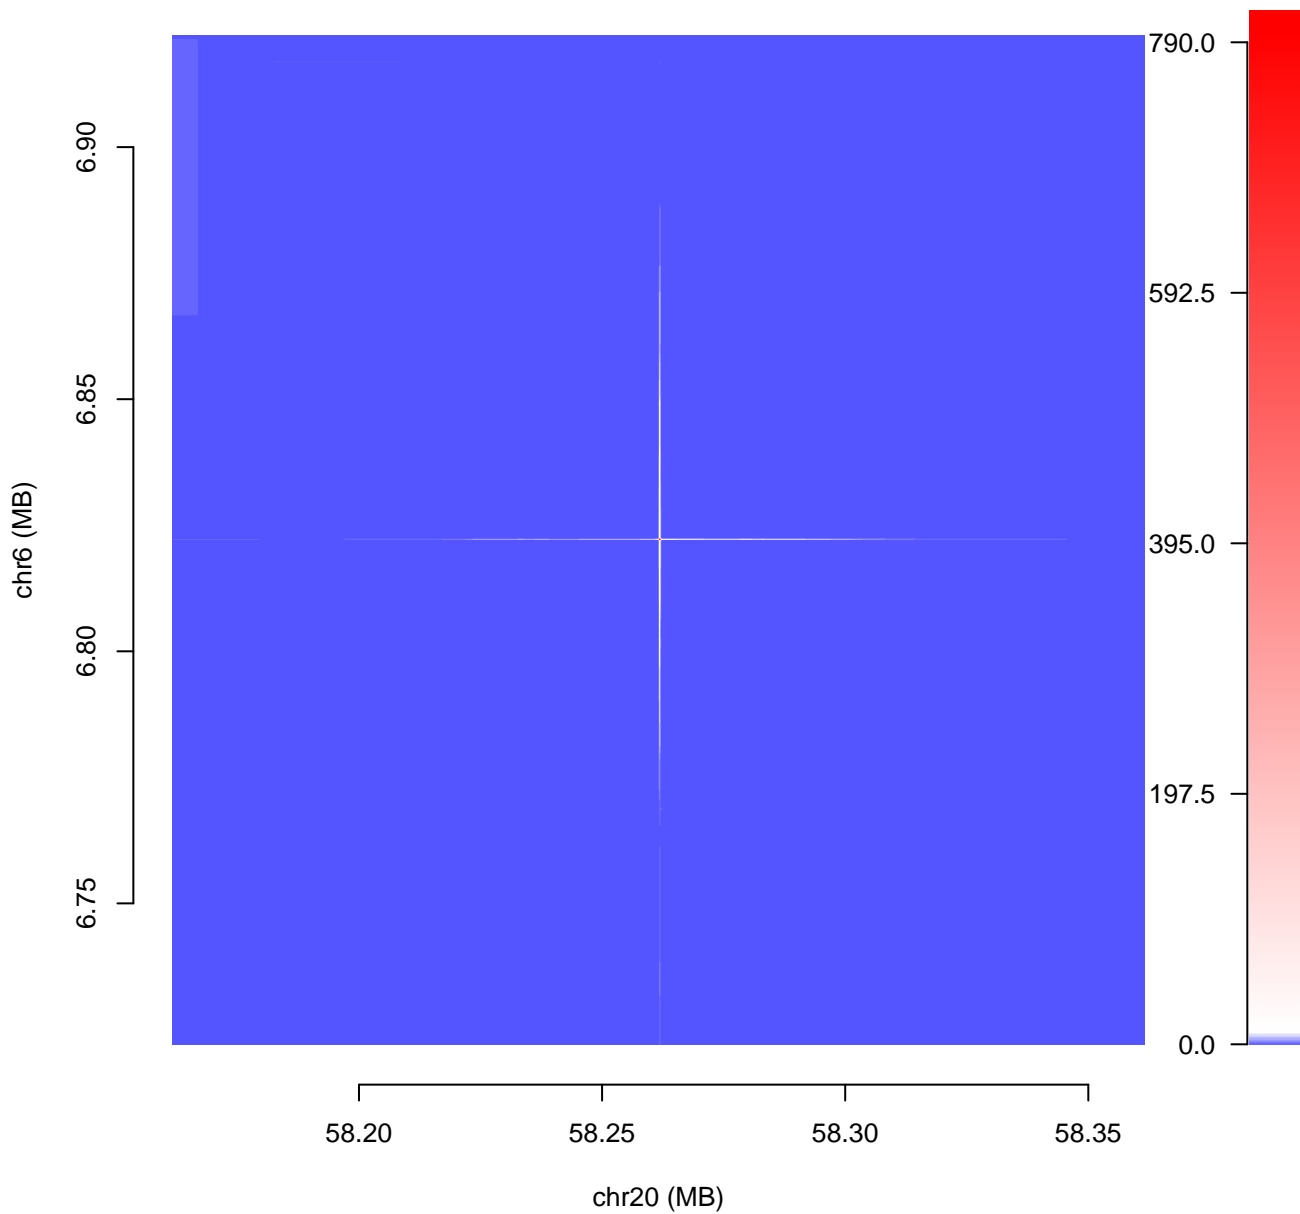

Supplement: Supplemental_Data.zip [file event_140.pdf › event_140.pdf]

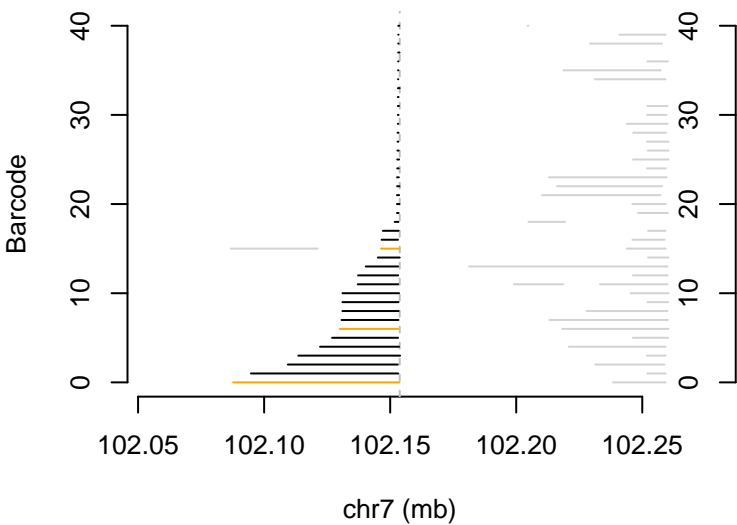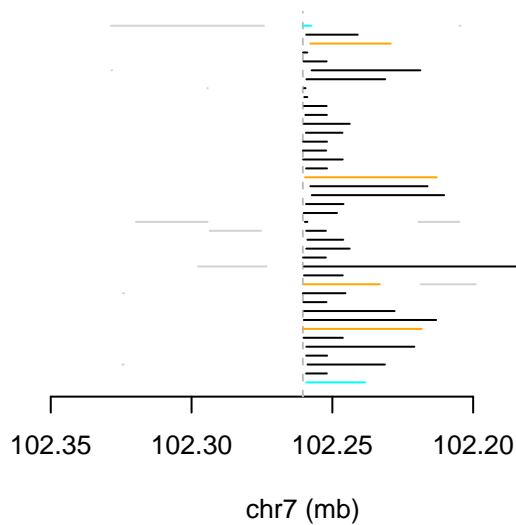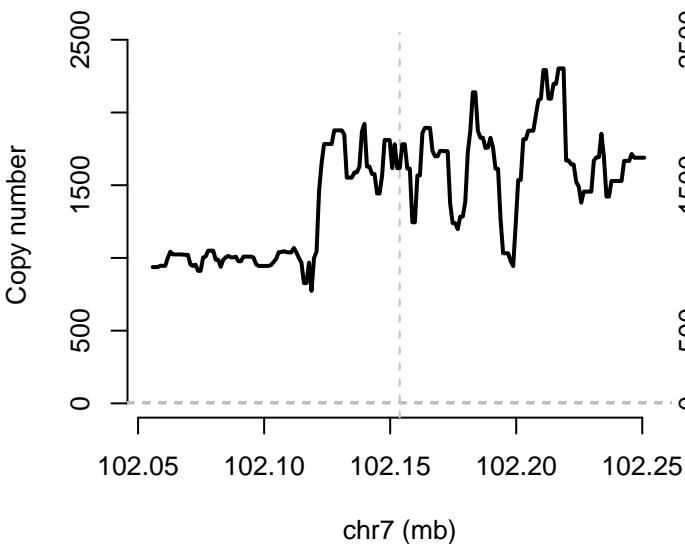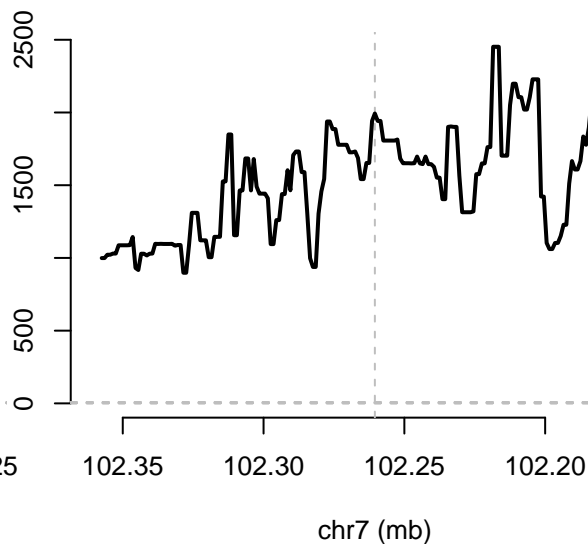

K562 chr7:102,153,795::chr7:102,260,469++

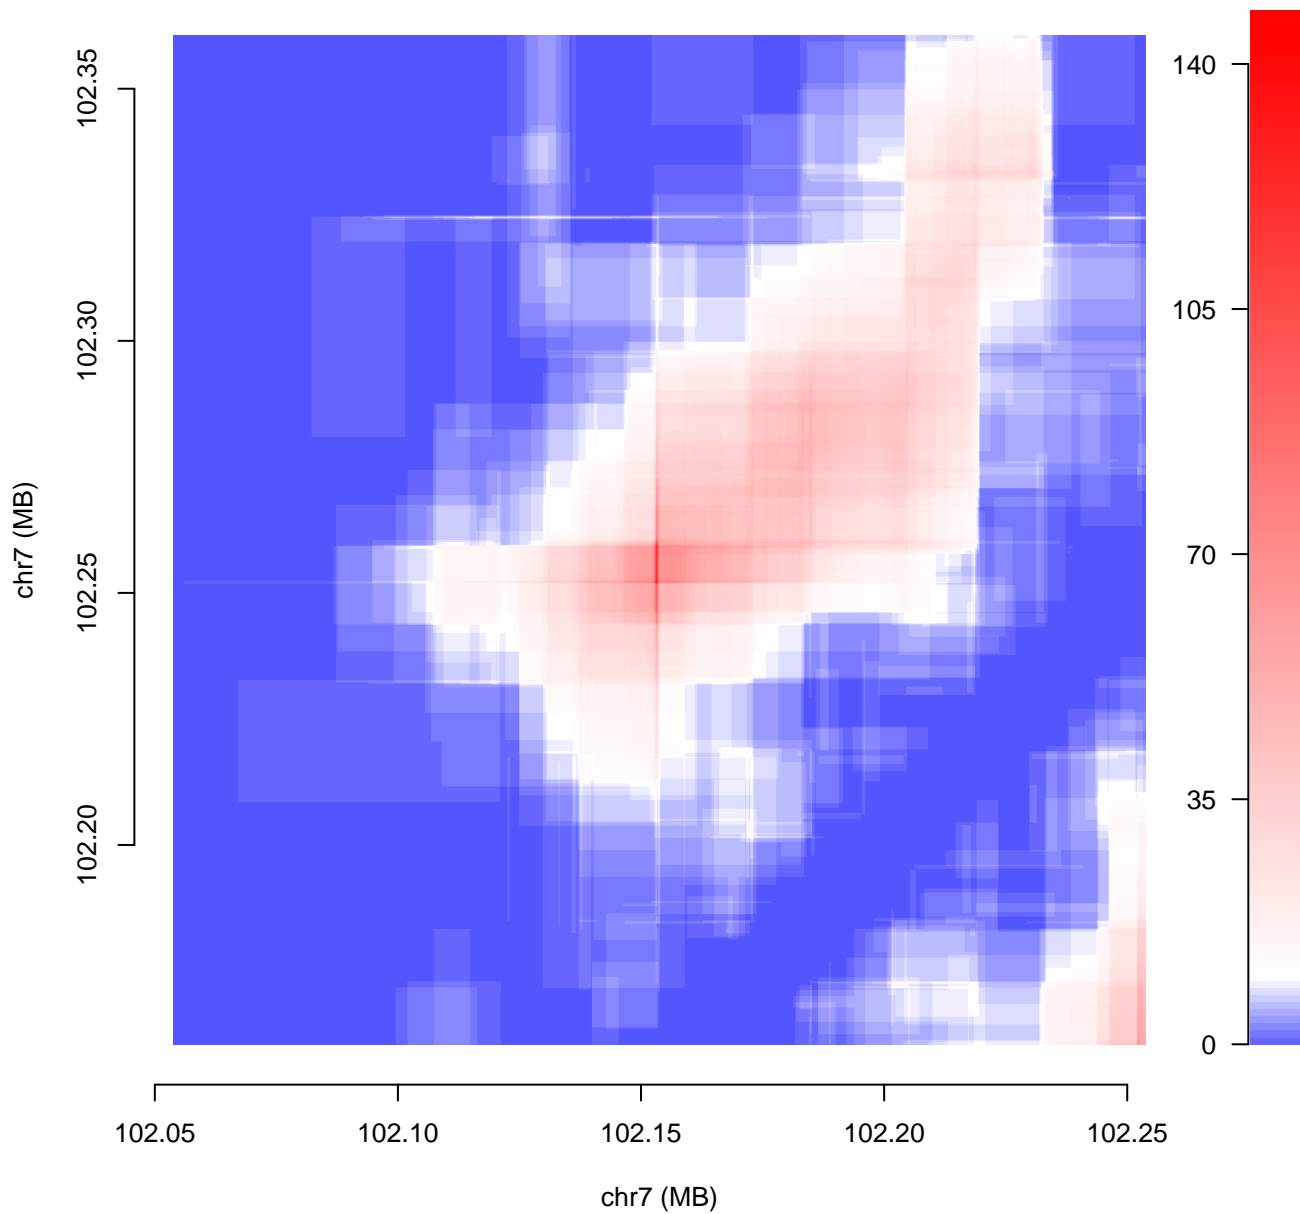

Supplement: Supplemental_Data.zip [file event_141.pdf › event_141.pdf]

Barcode

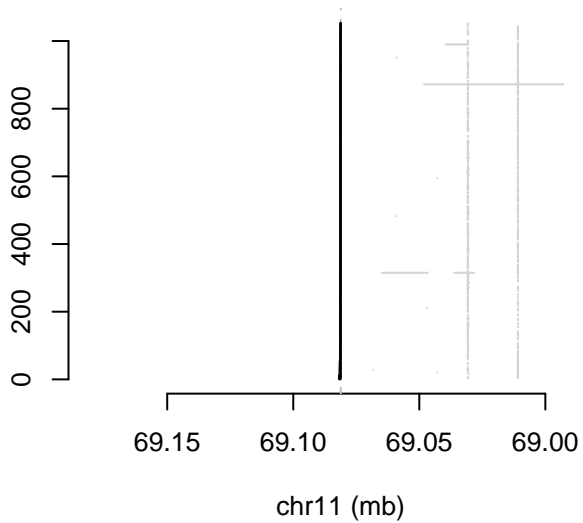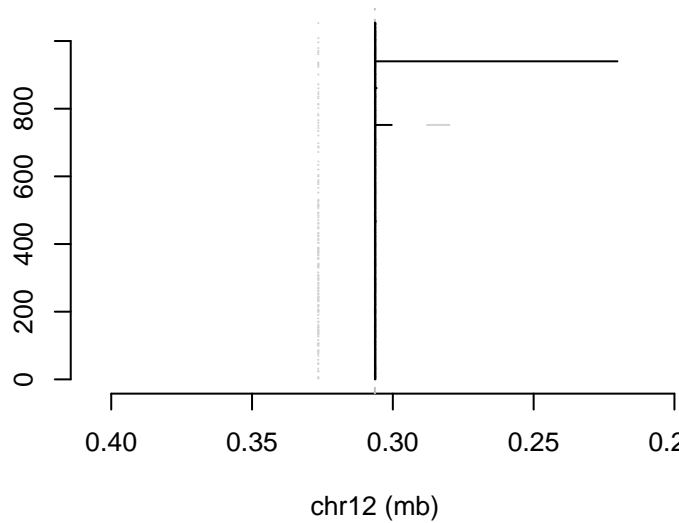

Copy number

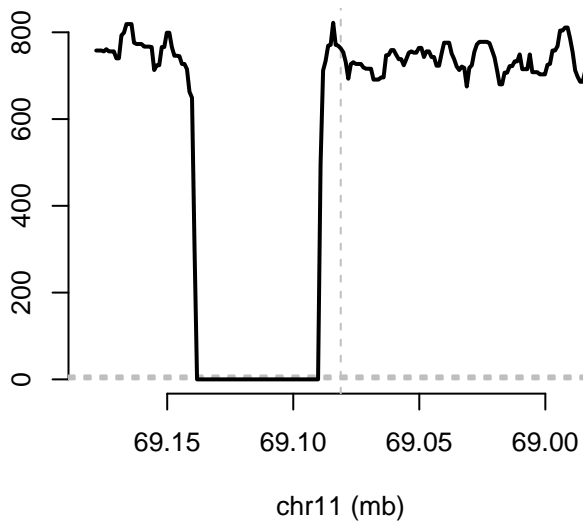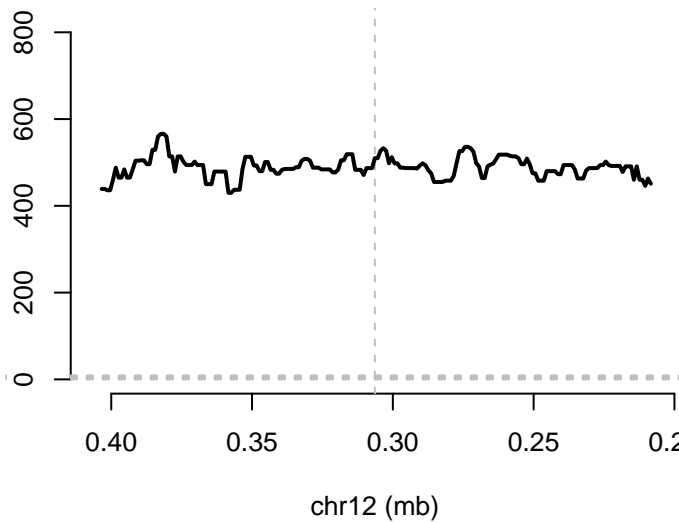

K562 chr11:69,081,163::chr12:306,377-+

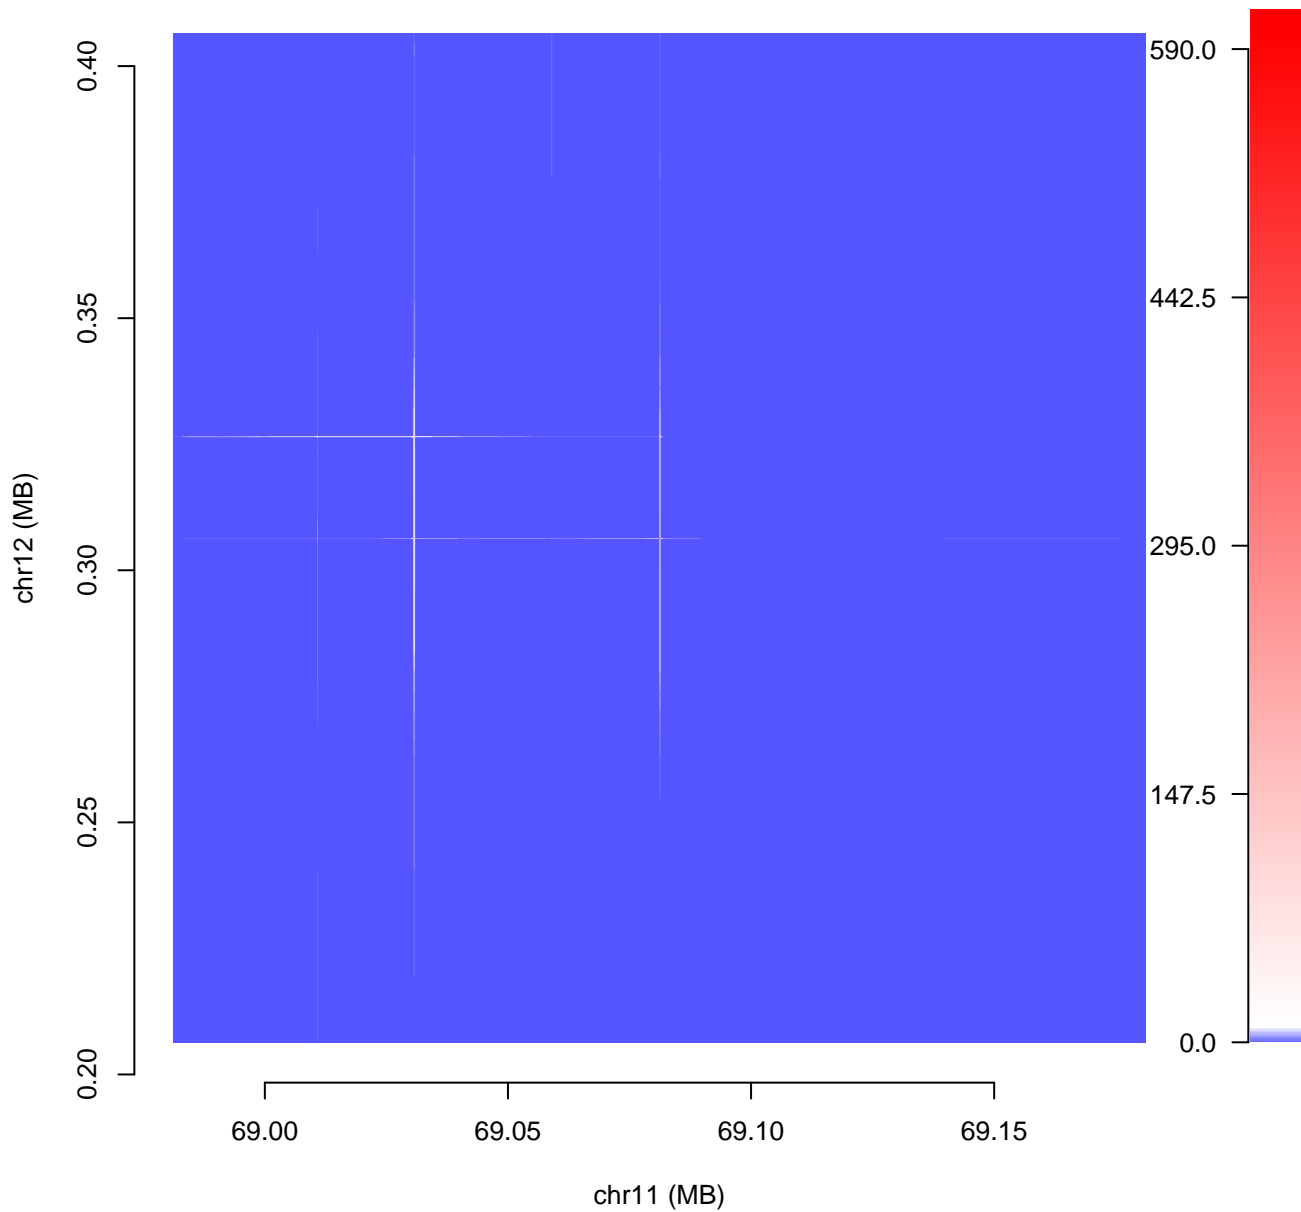

Supplement: Supplemental_Data.zip [file event_142.pdf › event_142.pdf]

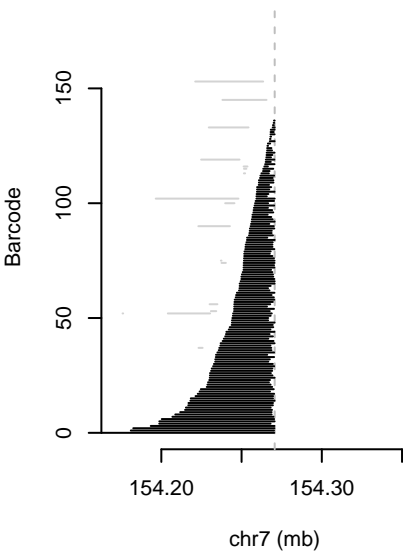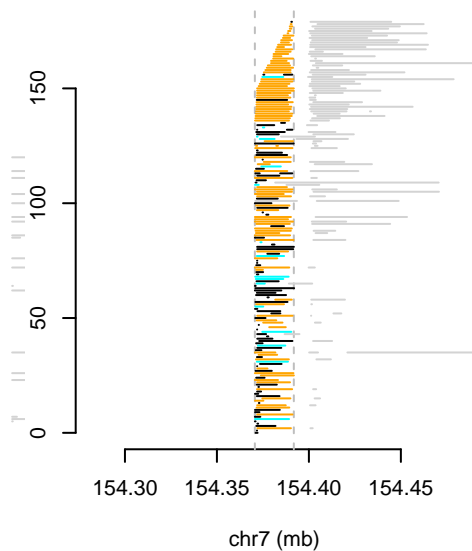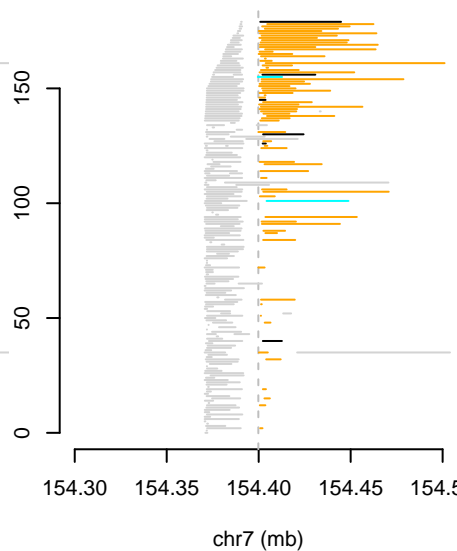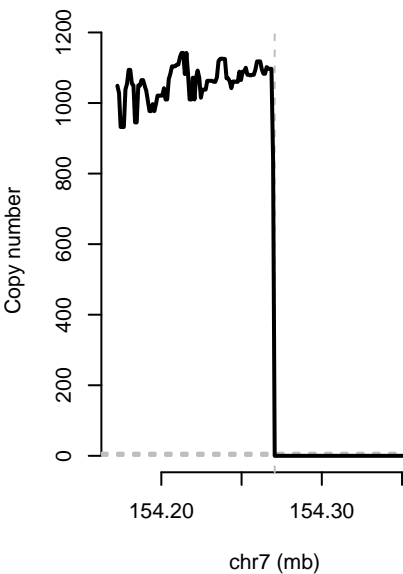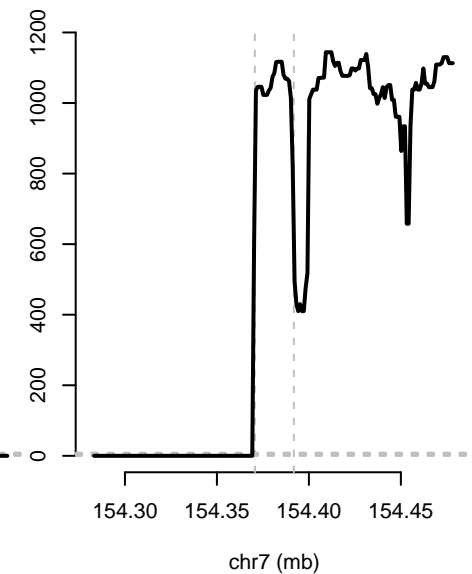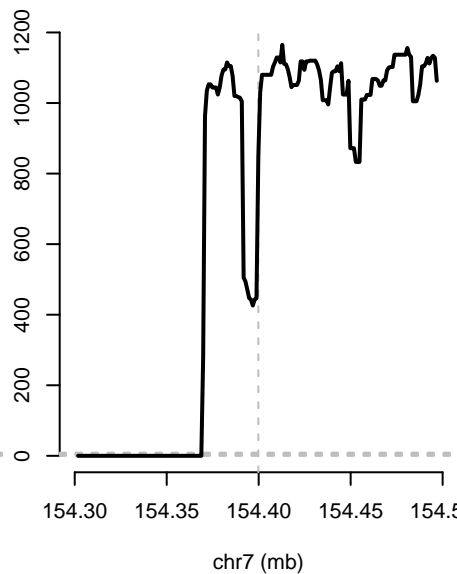

K562 chr7:154,370,630::chr7:154,270,636-+

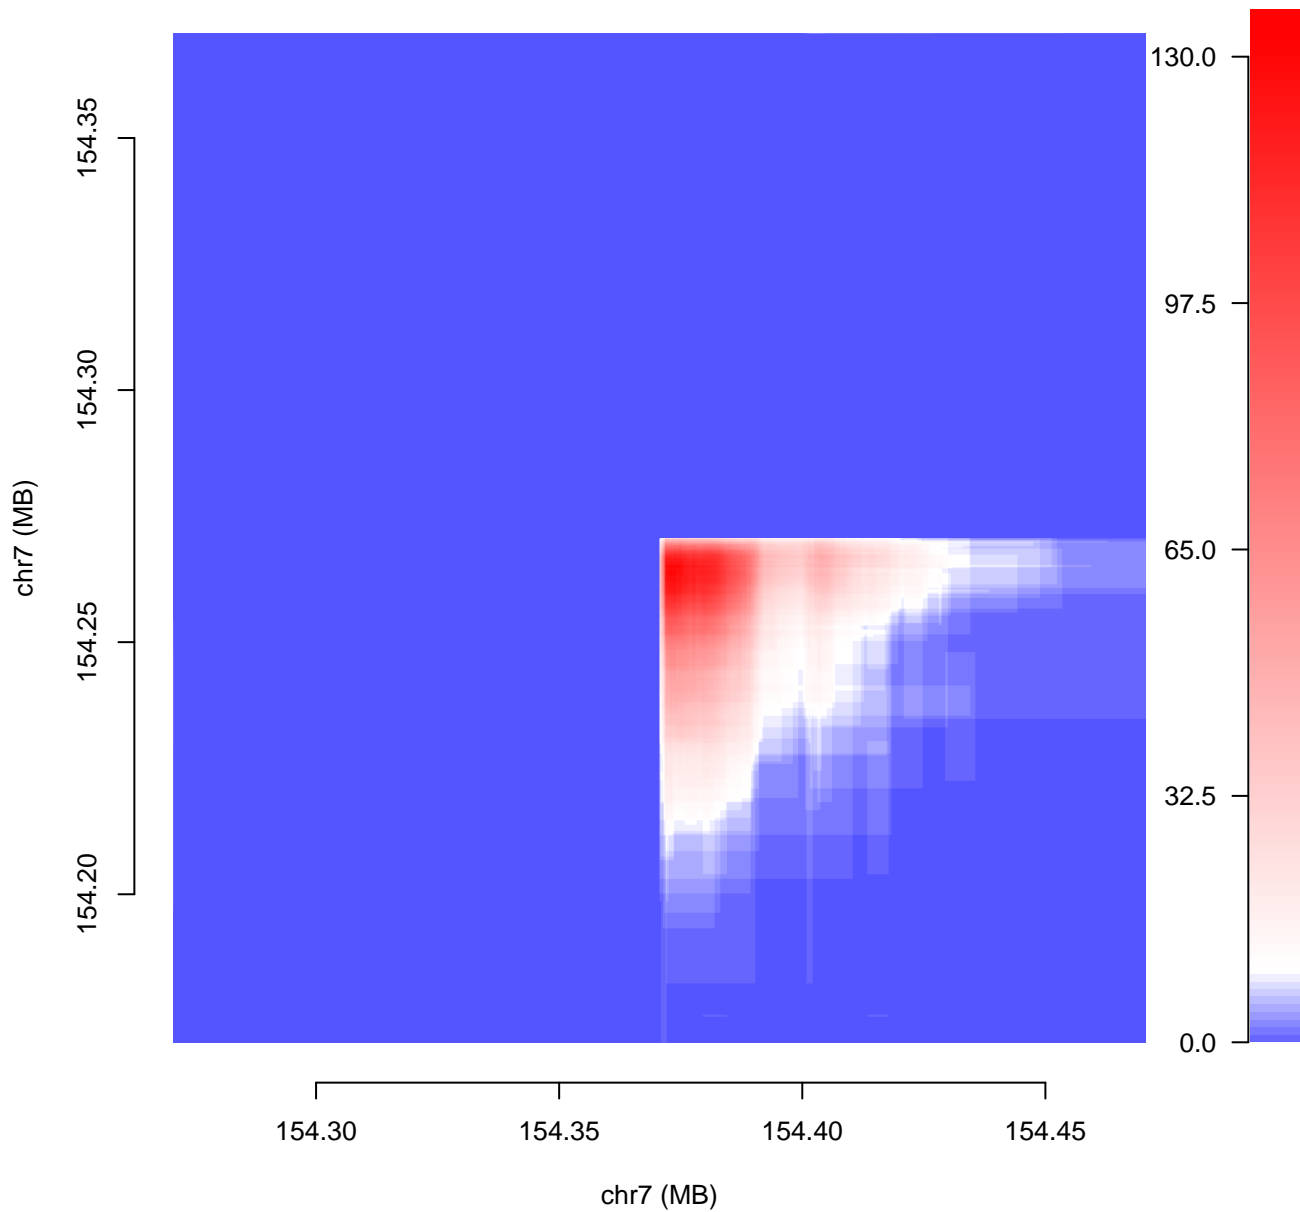

K562 chr7:154,370,630::chr7:154,391,802-+

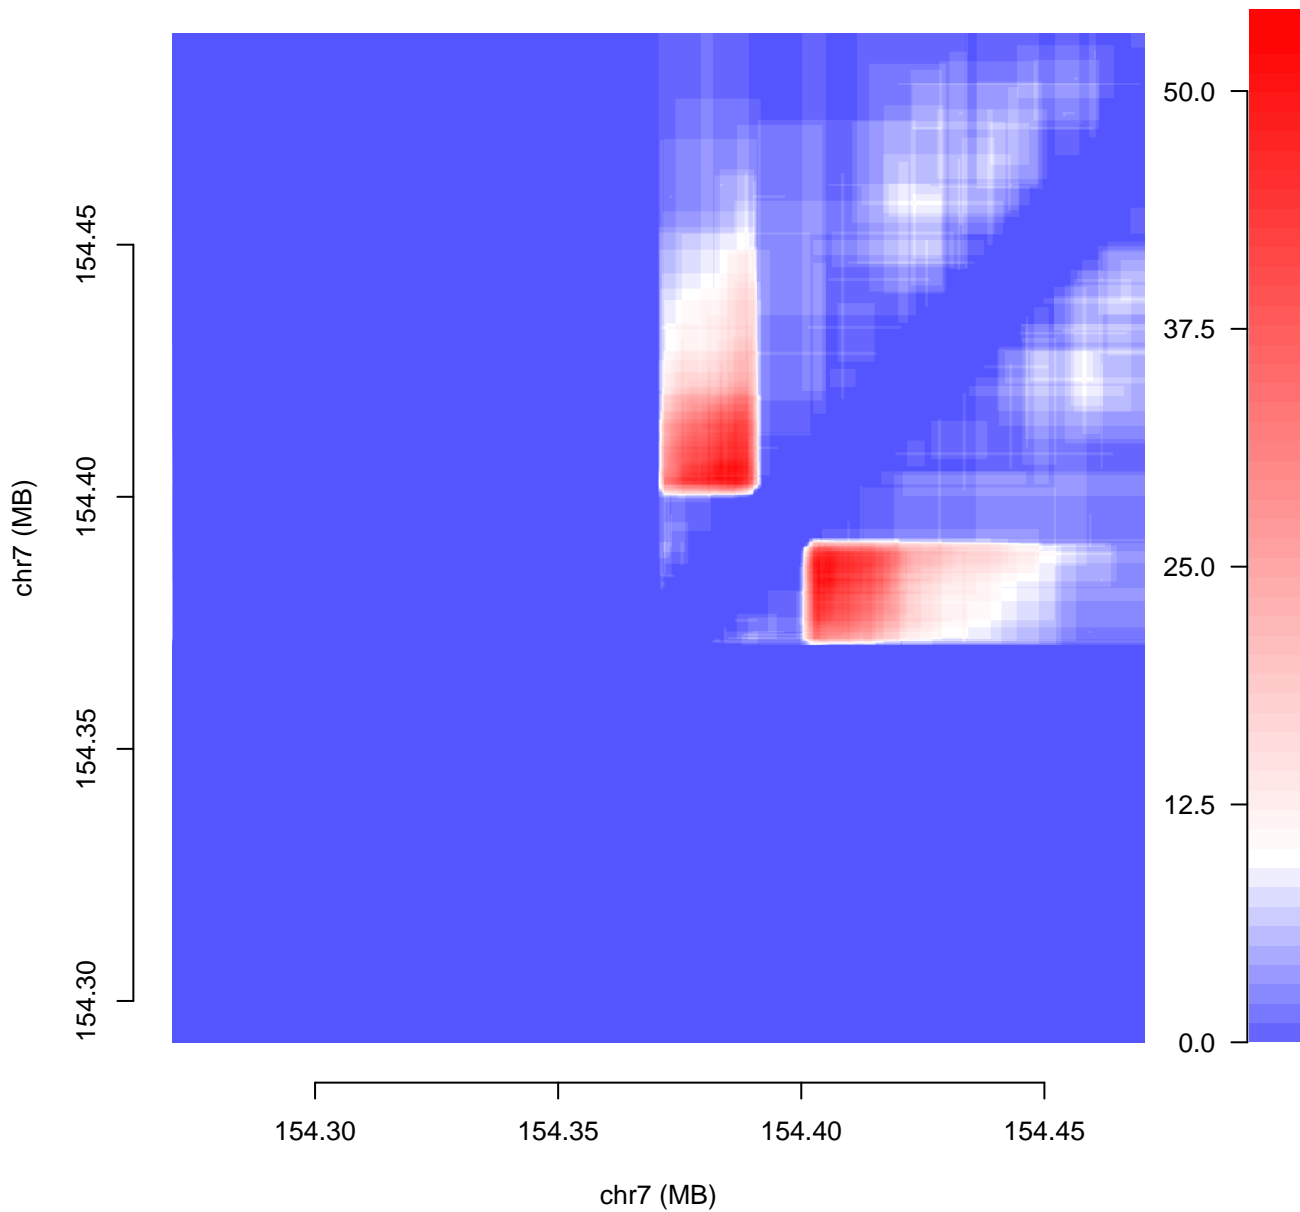

K562 chr7:154,399,820::chr7:154,391,802-+

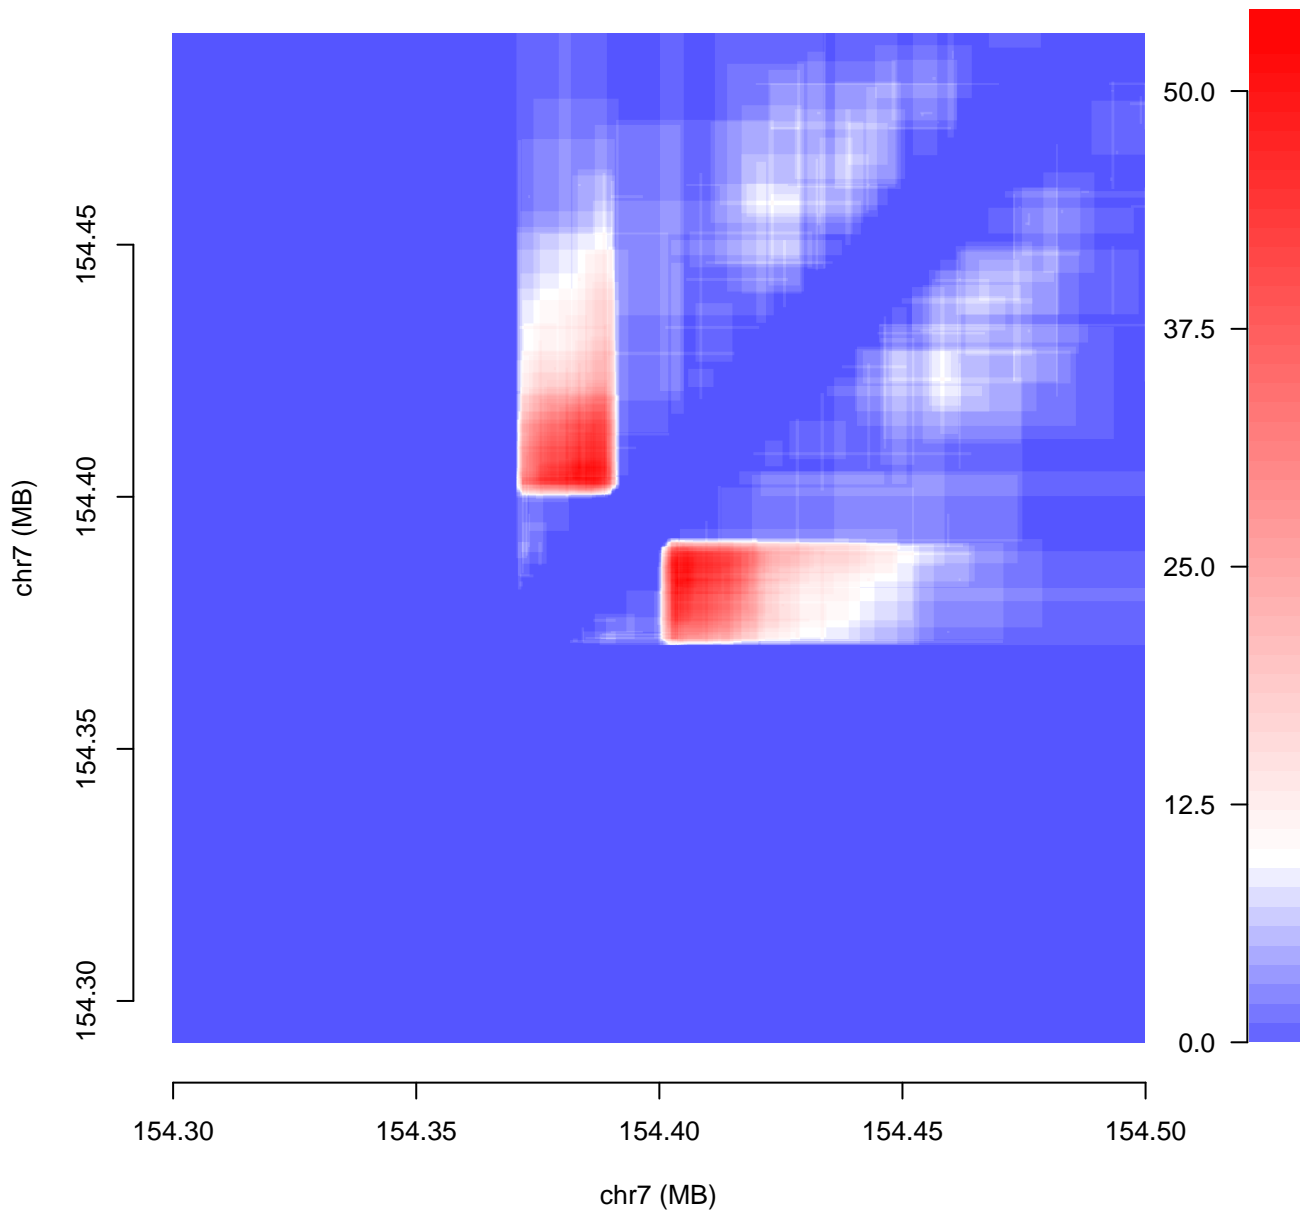

Supplement: Supplemental_Data.zip [file event_143.pdf › event_143.pdf]

Barcode

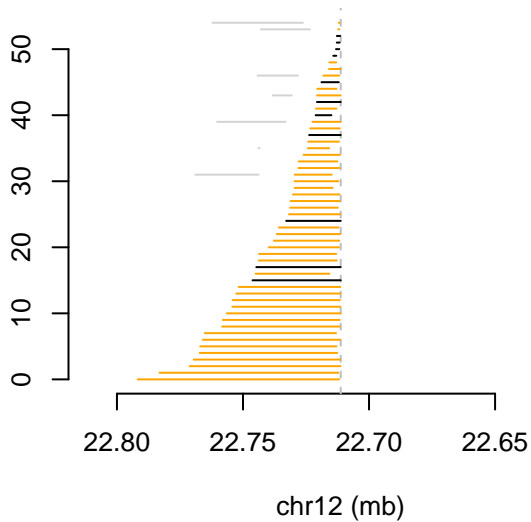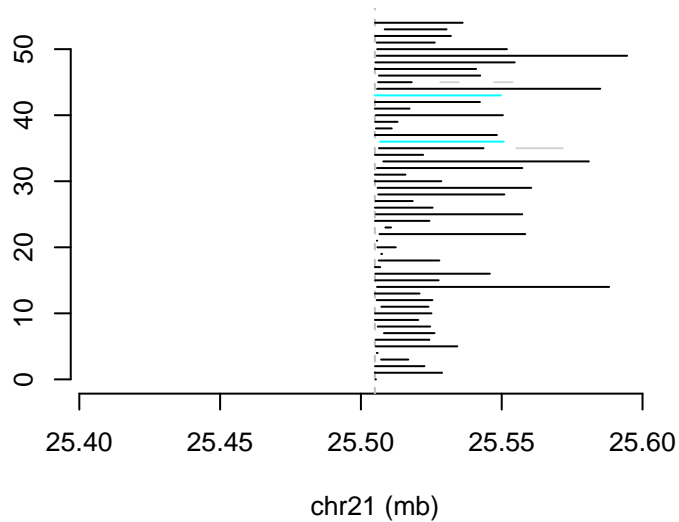

Copy number

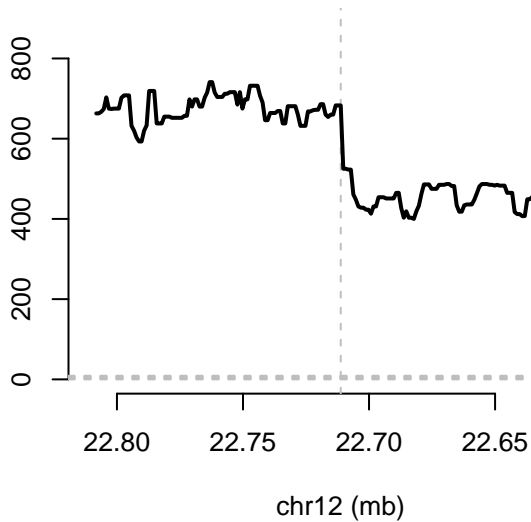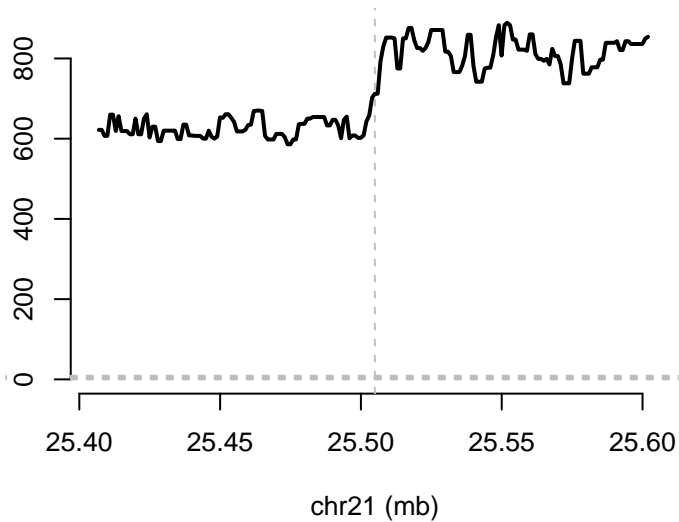

K562 chr12:22,711,222::chr21:25,504,957--

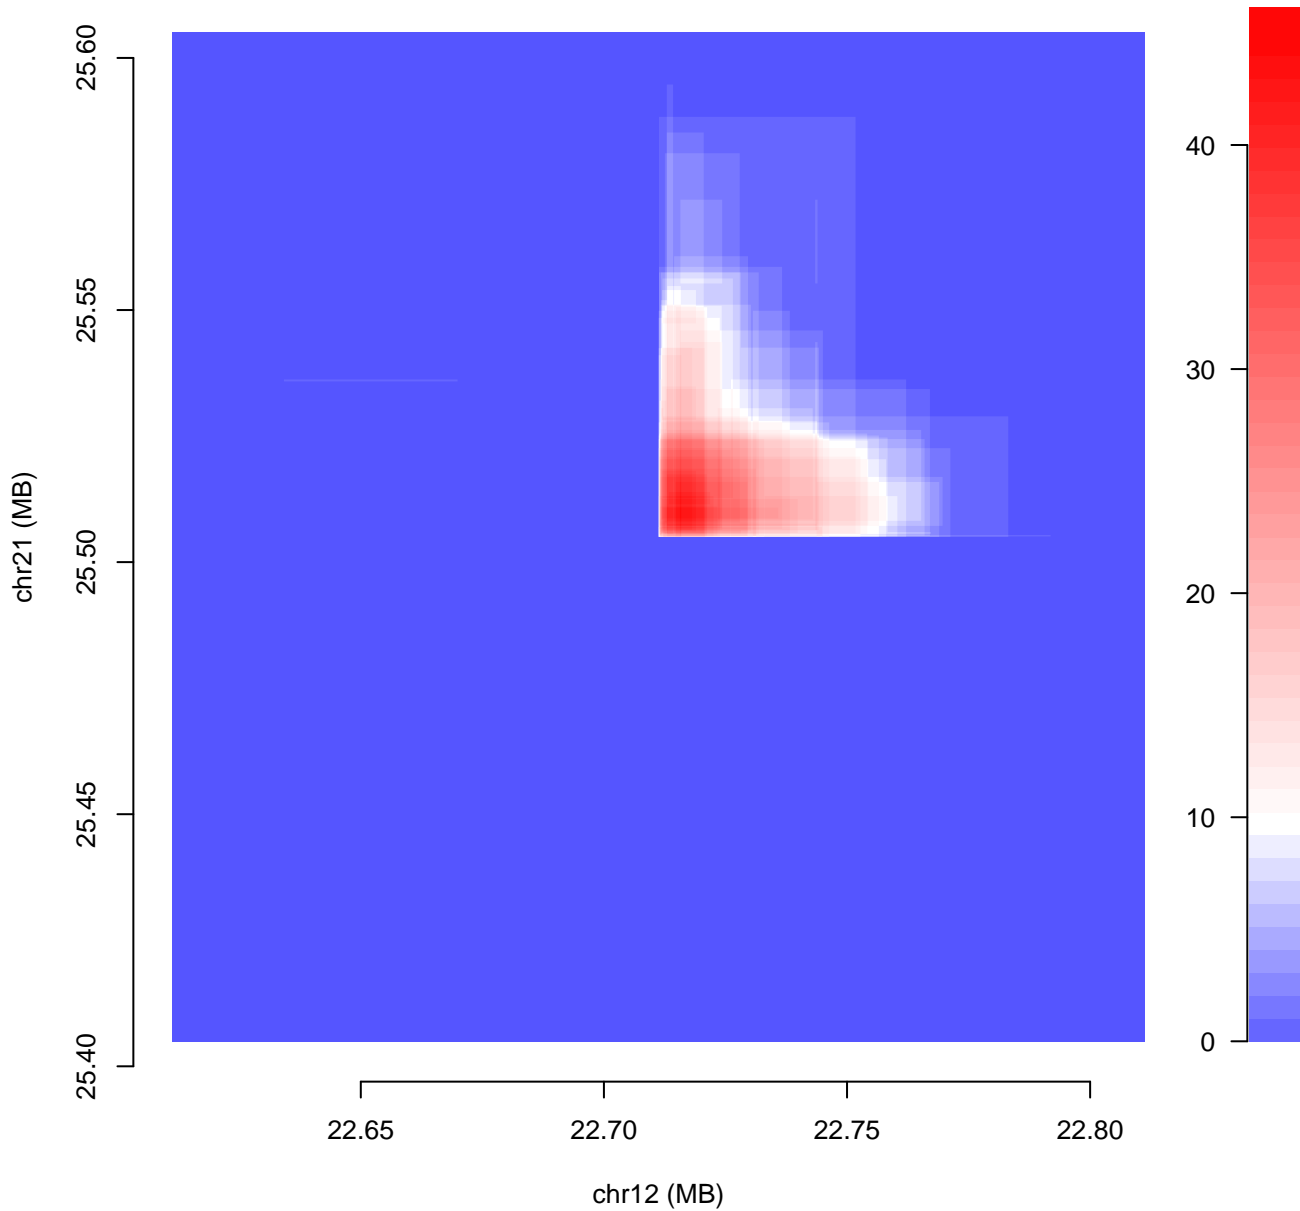

Supplement: Supplemental_Data.zip [file event_144.pdf › event_144.pdf]

Barcode

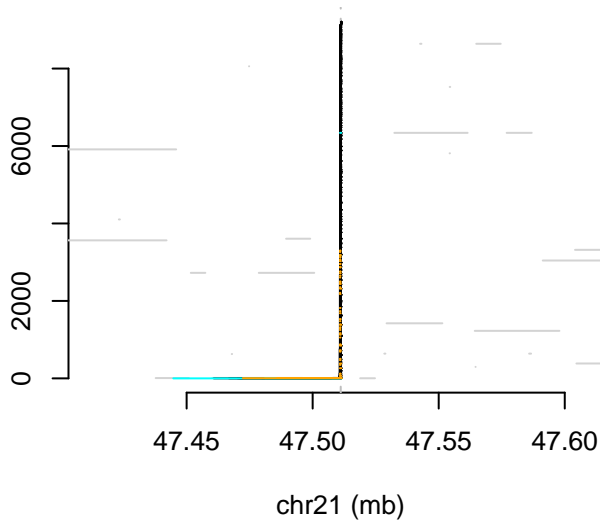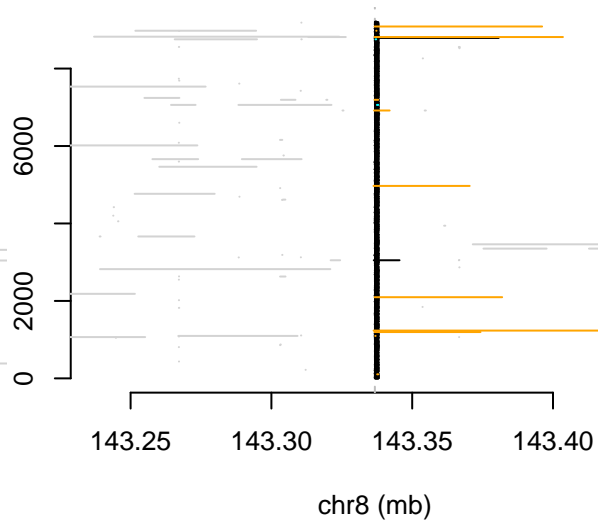

Copy number

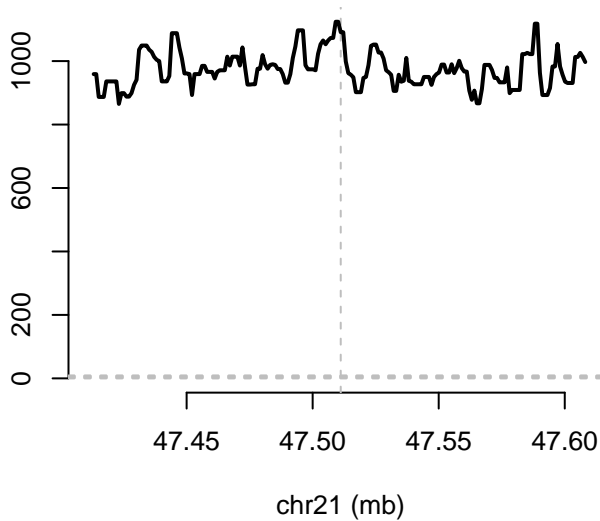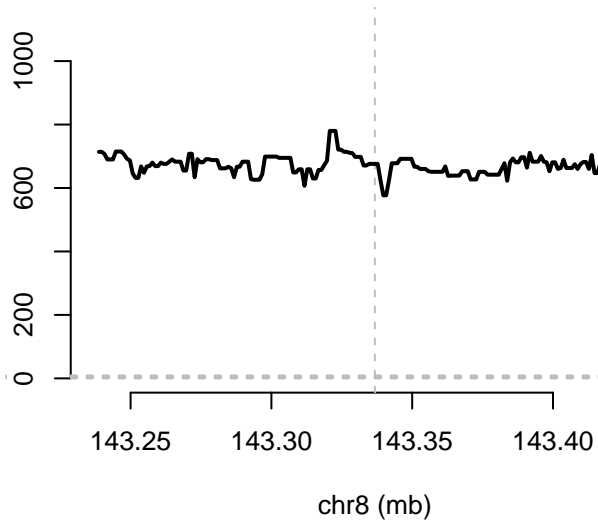

K562 chr21:47,511,140::chr8:143,336,742+-

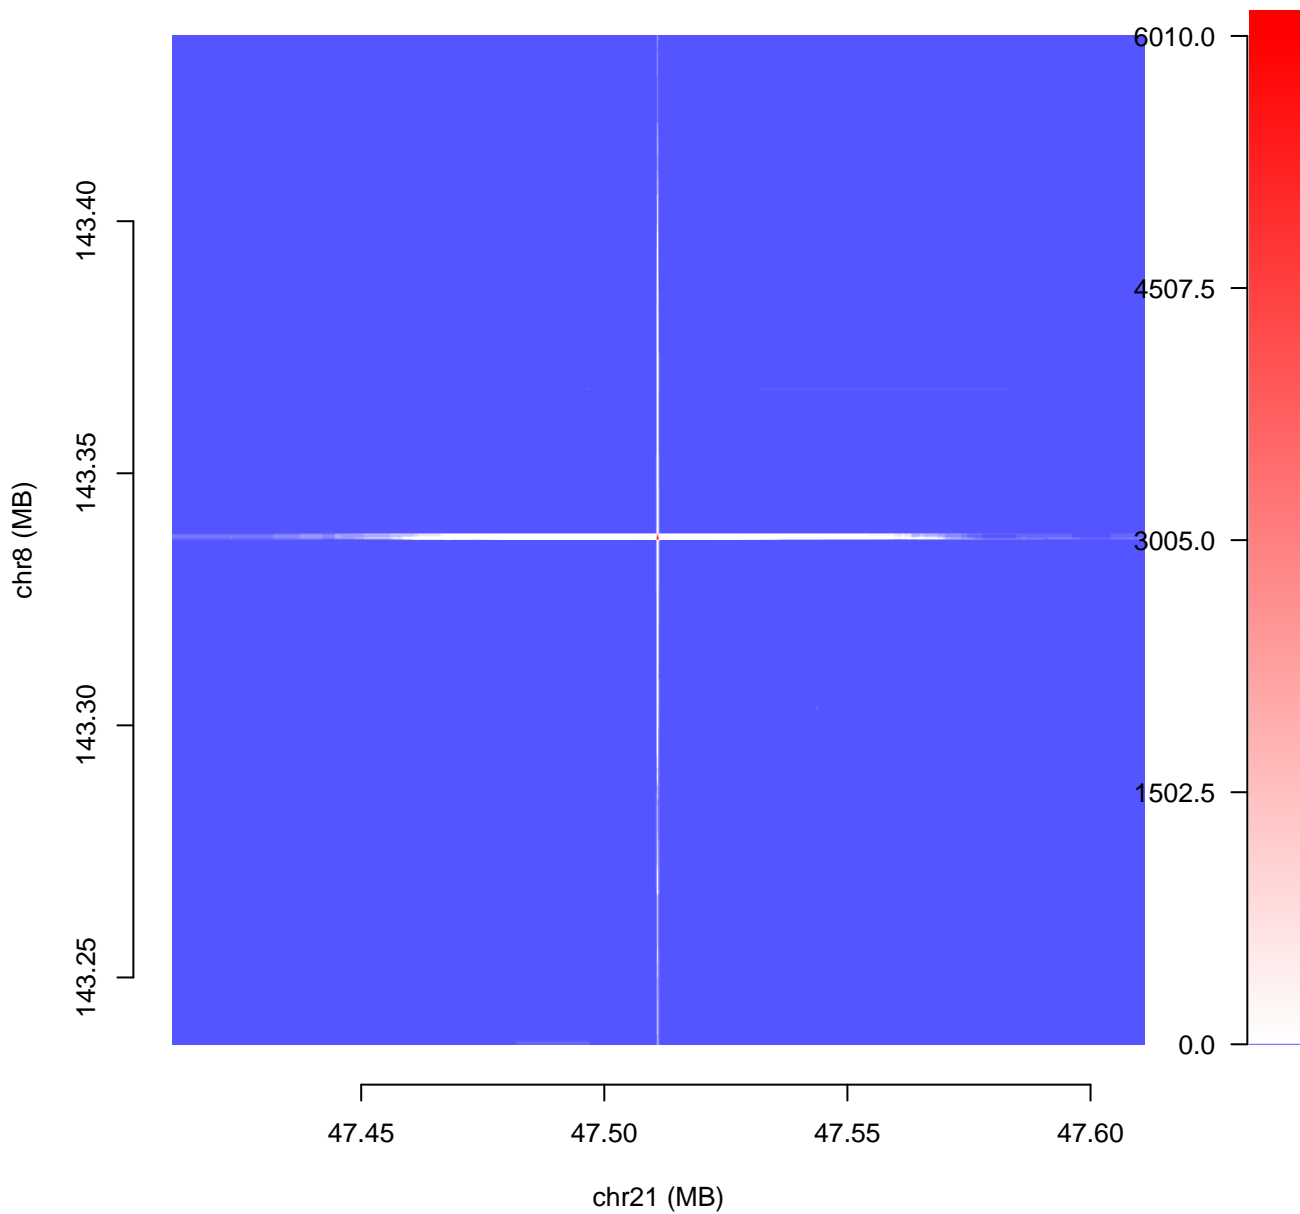

Supplement: Supplemental_Data.zip [file event_145.pdf › event_145.pdf]

Barcode

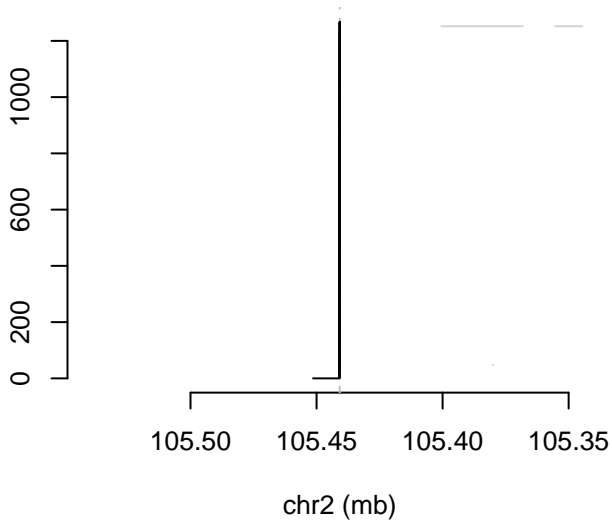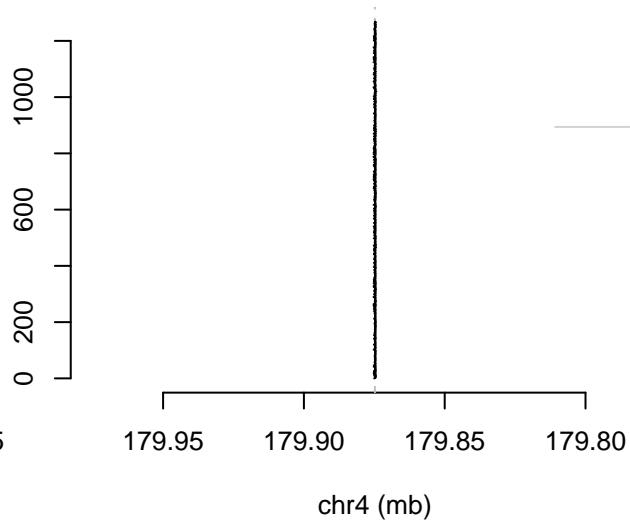

Copy number

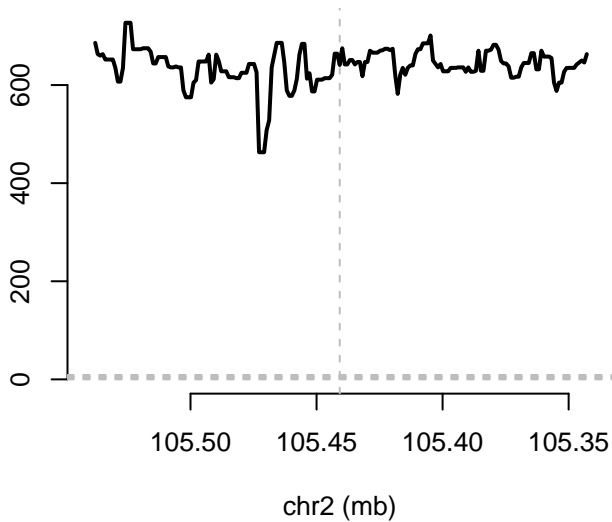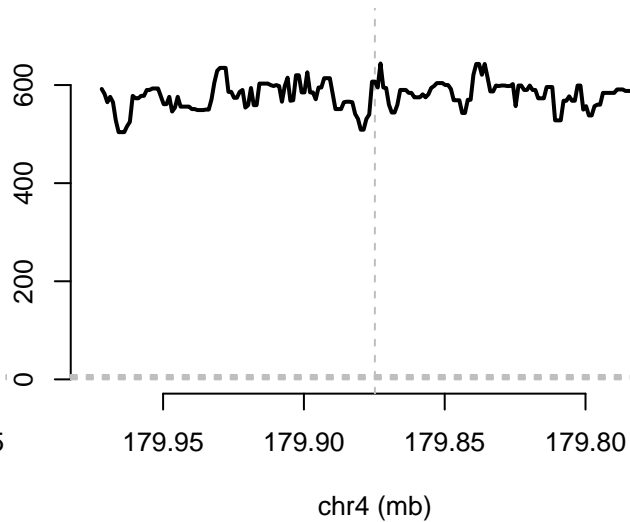

K562 chr2:105,440,800::chr4:179,874,795-+

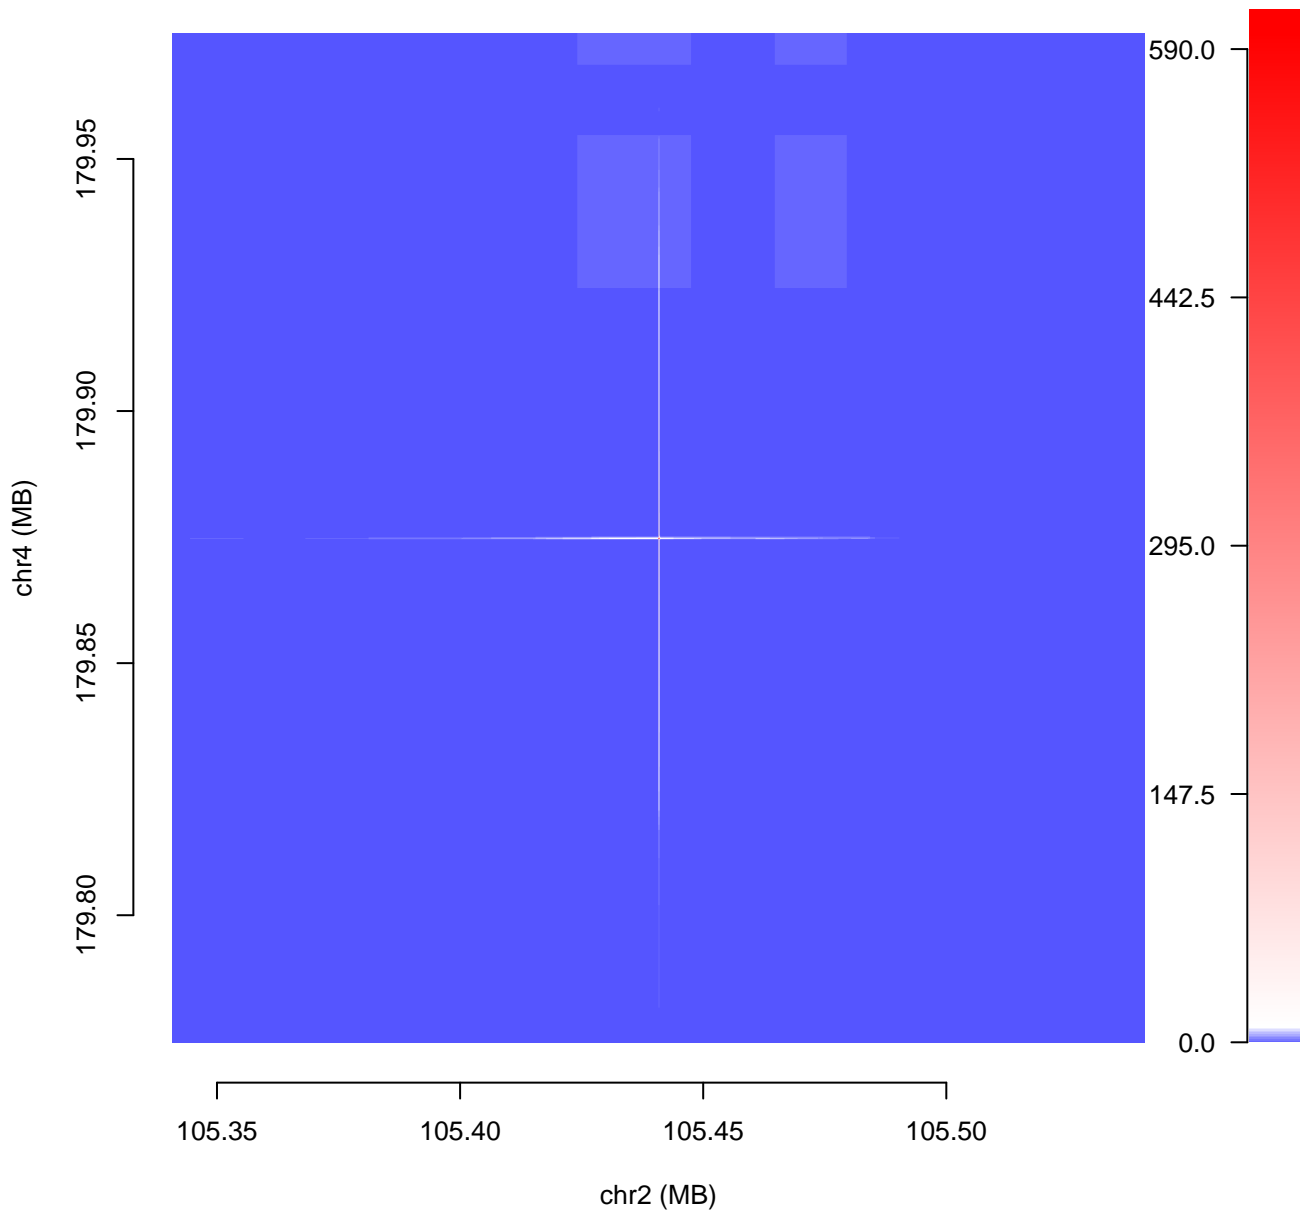

Supplement: Supplemental_Data.zip [file event_146.pdf › event_146.pdf]

Barcode

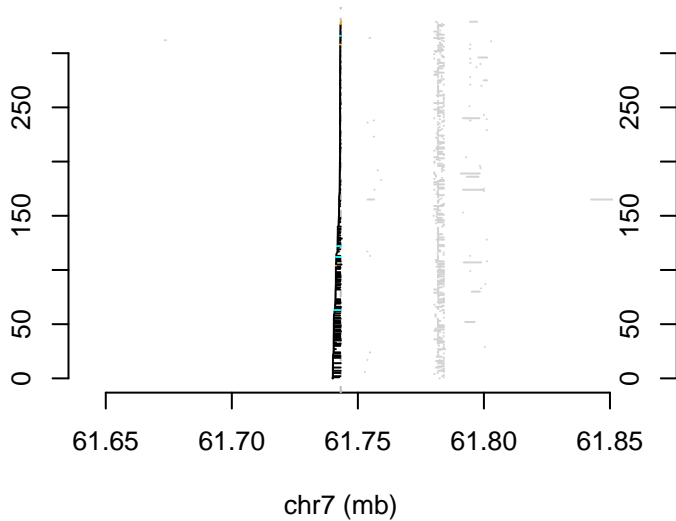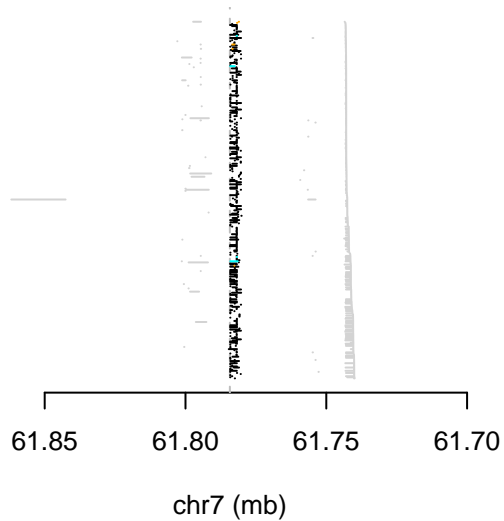

Copy number

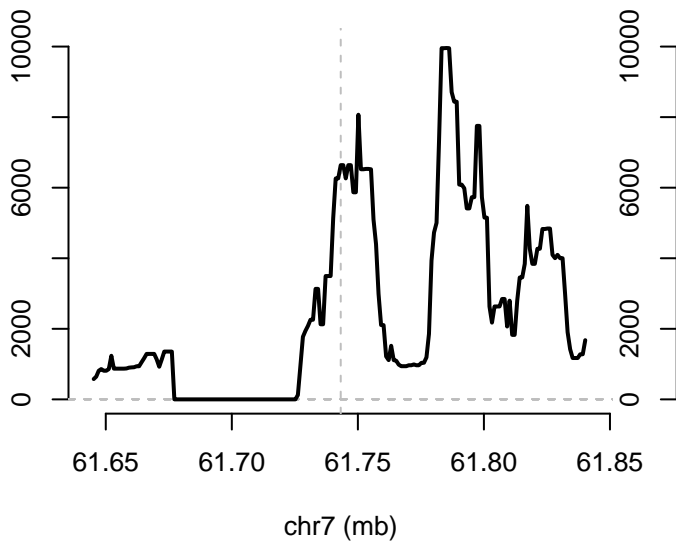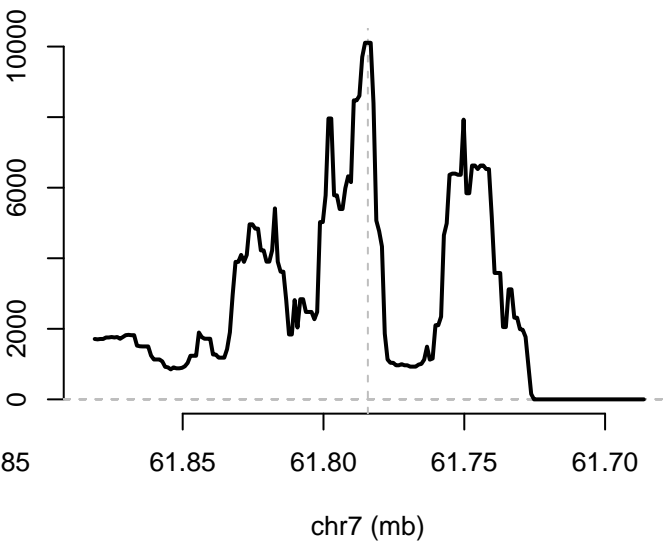

K562 chr7:61,784,236::chr7:61,743,205++

chr7 (MB)

61.85  
61.80  
61.75  
61.70  
61.65

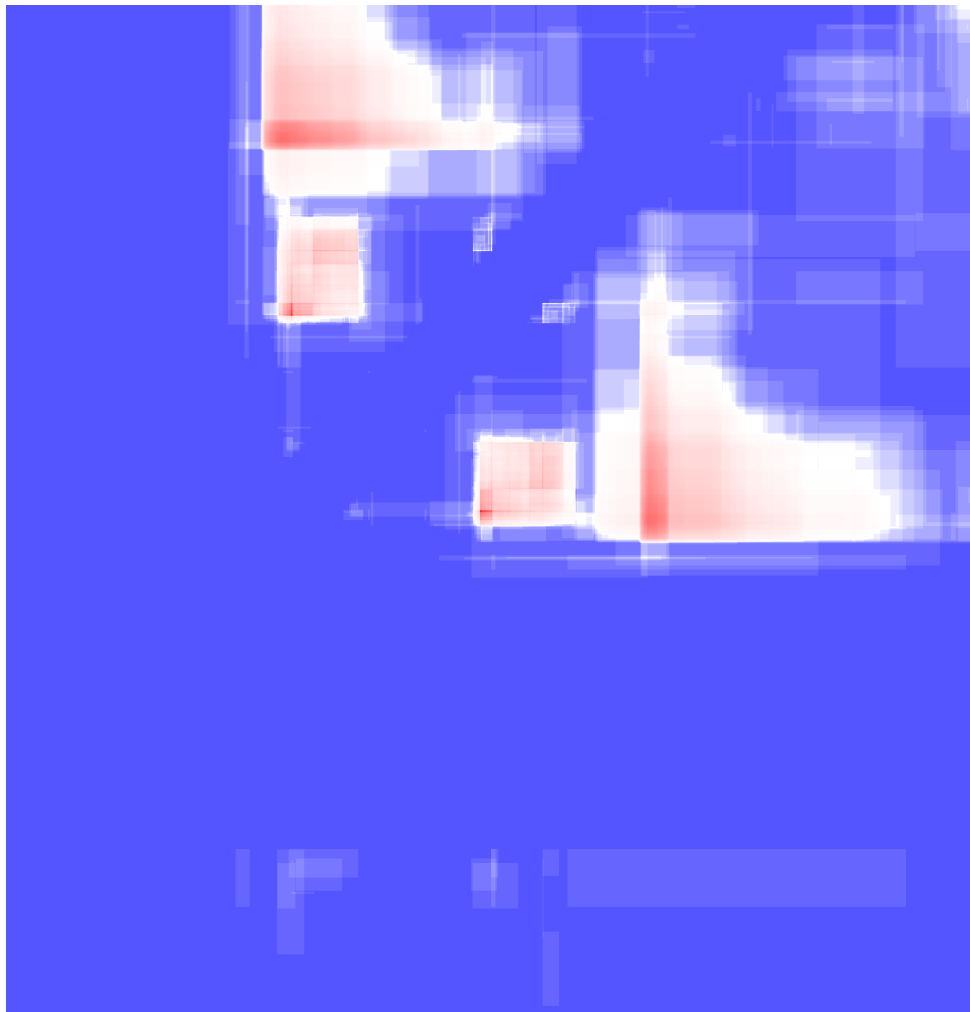

190.0  
142.5  
95.0  
47.5  
0.0

61.70

61.75

61.80

61.85

chr7 (MB)

Supplement: Supplemental_Data.zip [file event_147.pdf › event_147.pdf]

Barcode

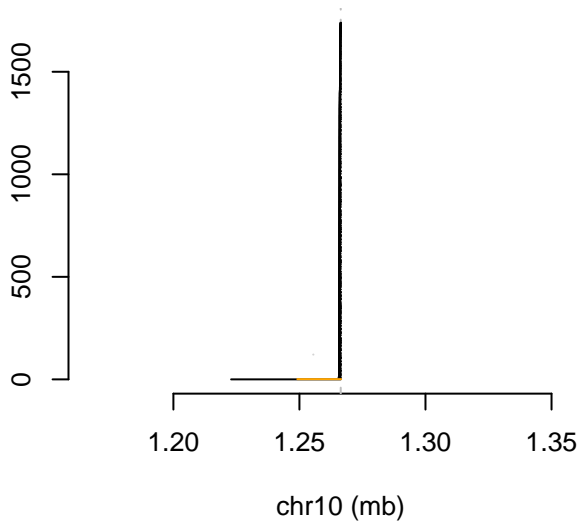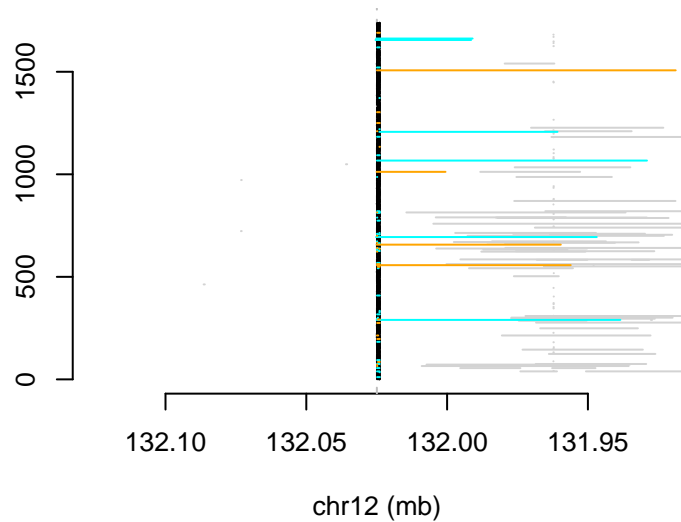

Copy number

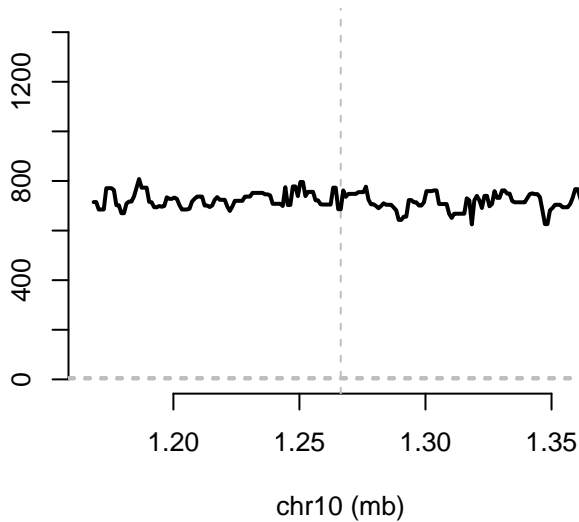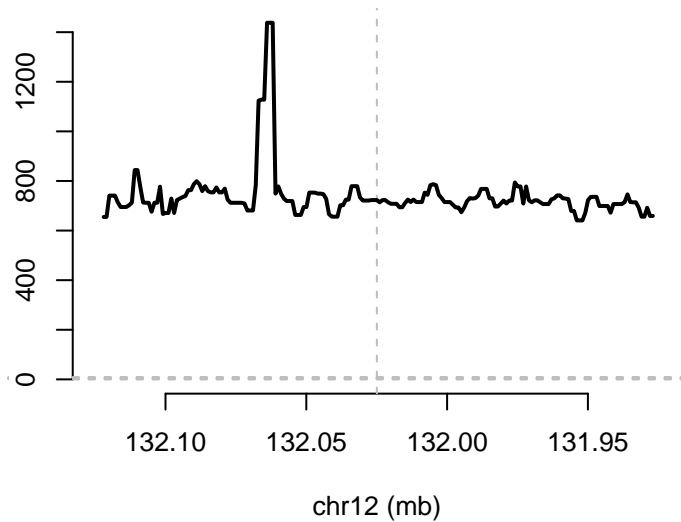

K562 chr12:132,024,944::chr10:1,266,385++

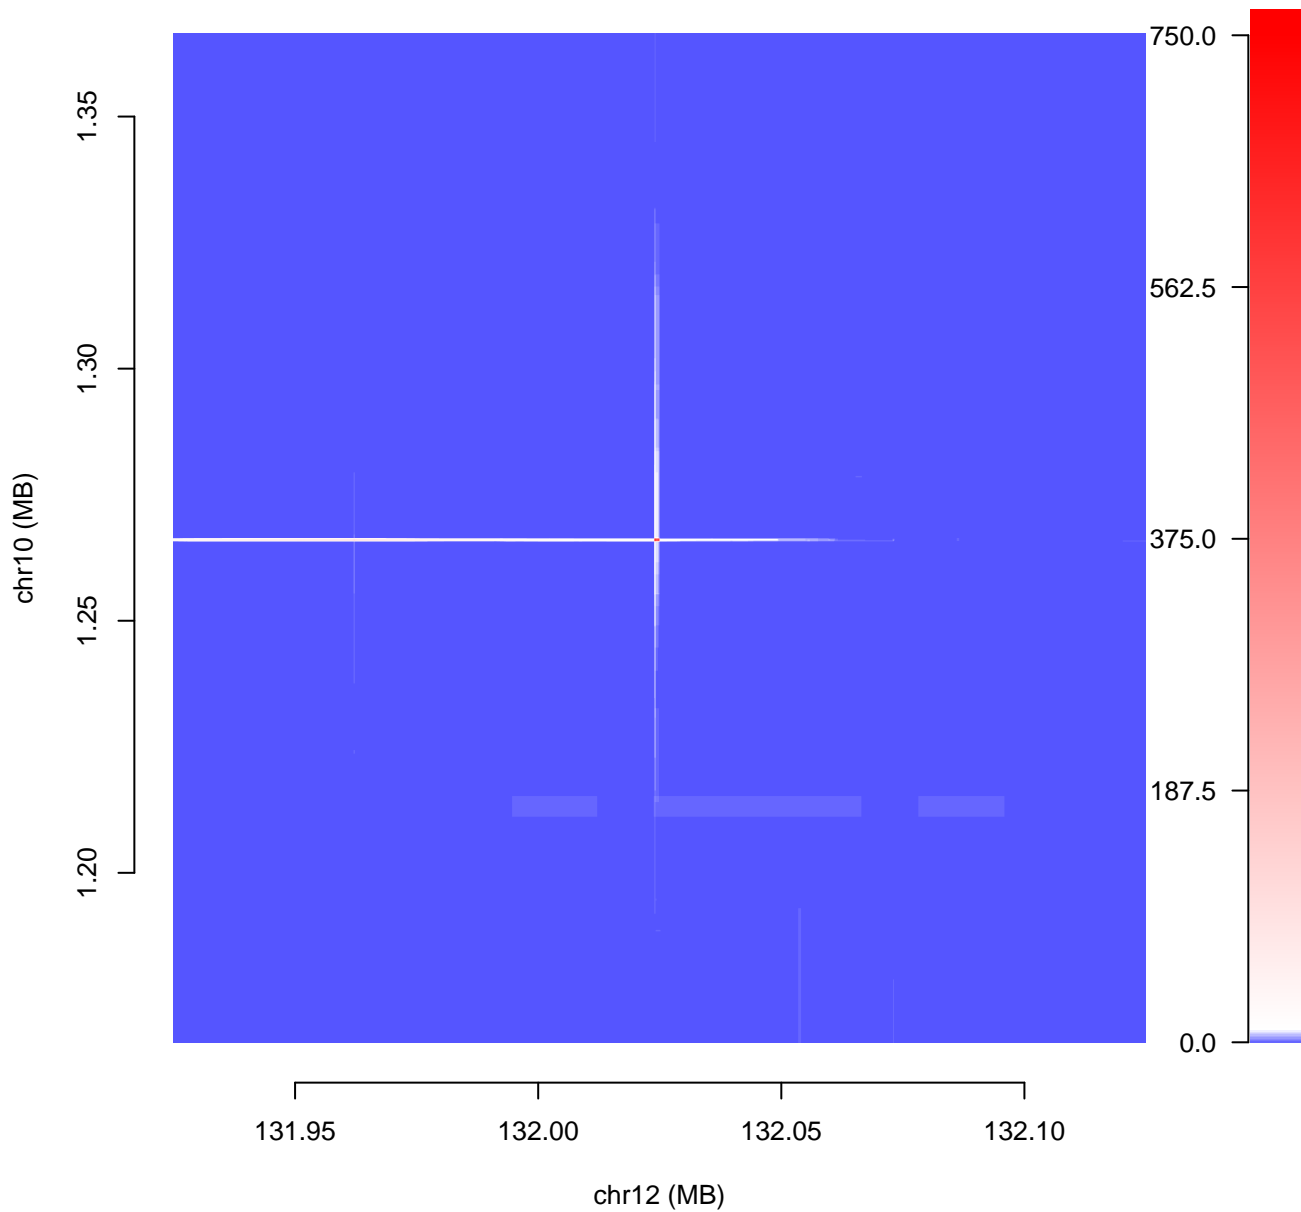

Supplement: Supplemental_Data.zip [file event_148.pdf › event_148.pdf]

Barcode

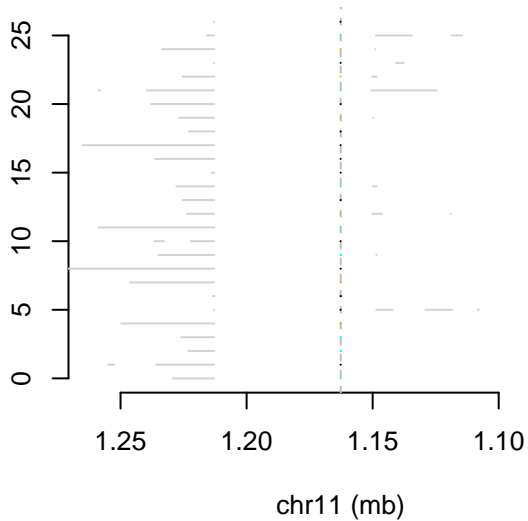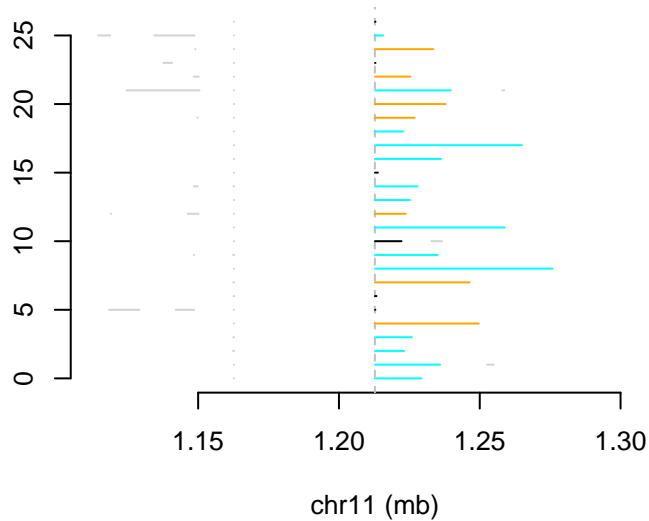

Copy number

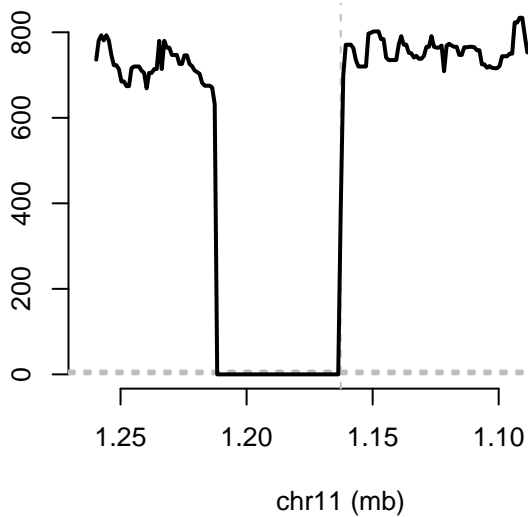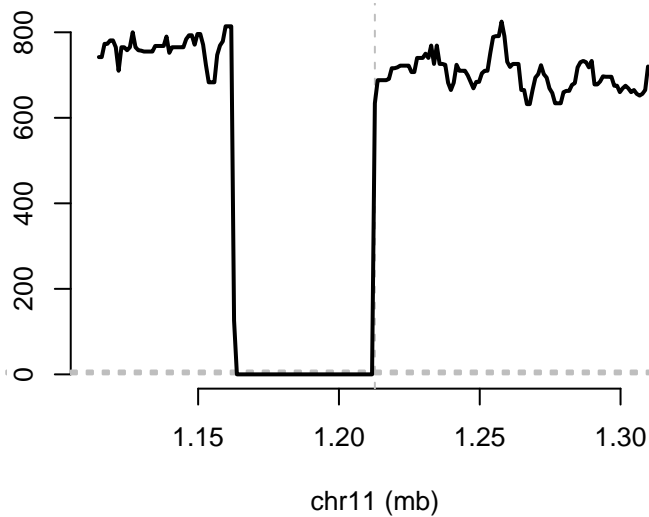

K562 chr11:1,162,656::chr11:1,212,758--

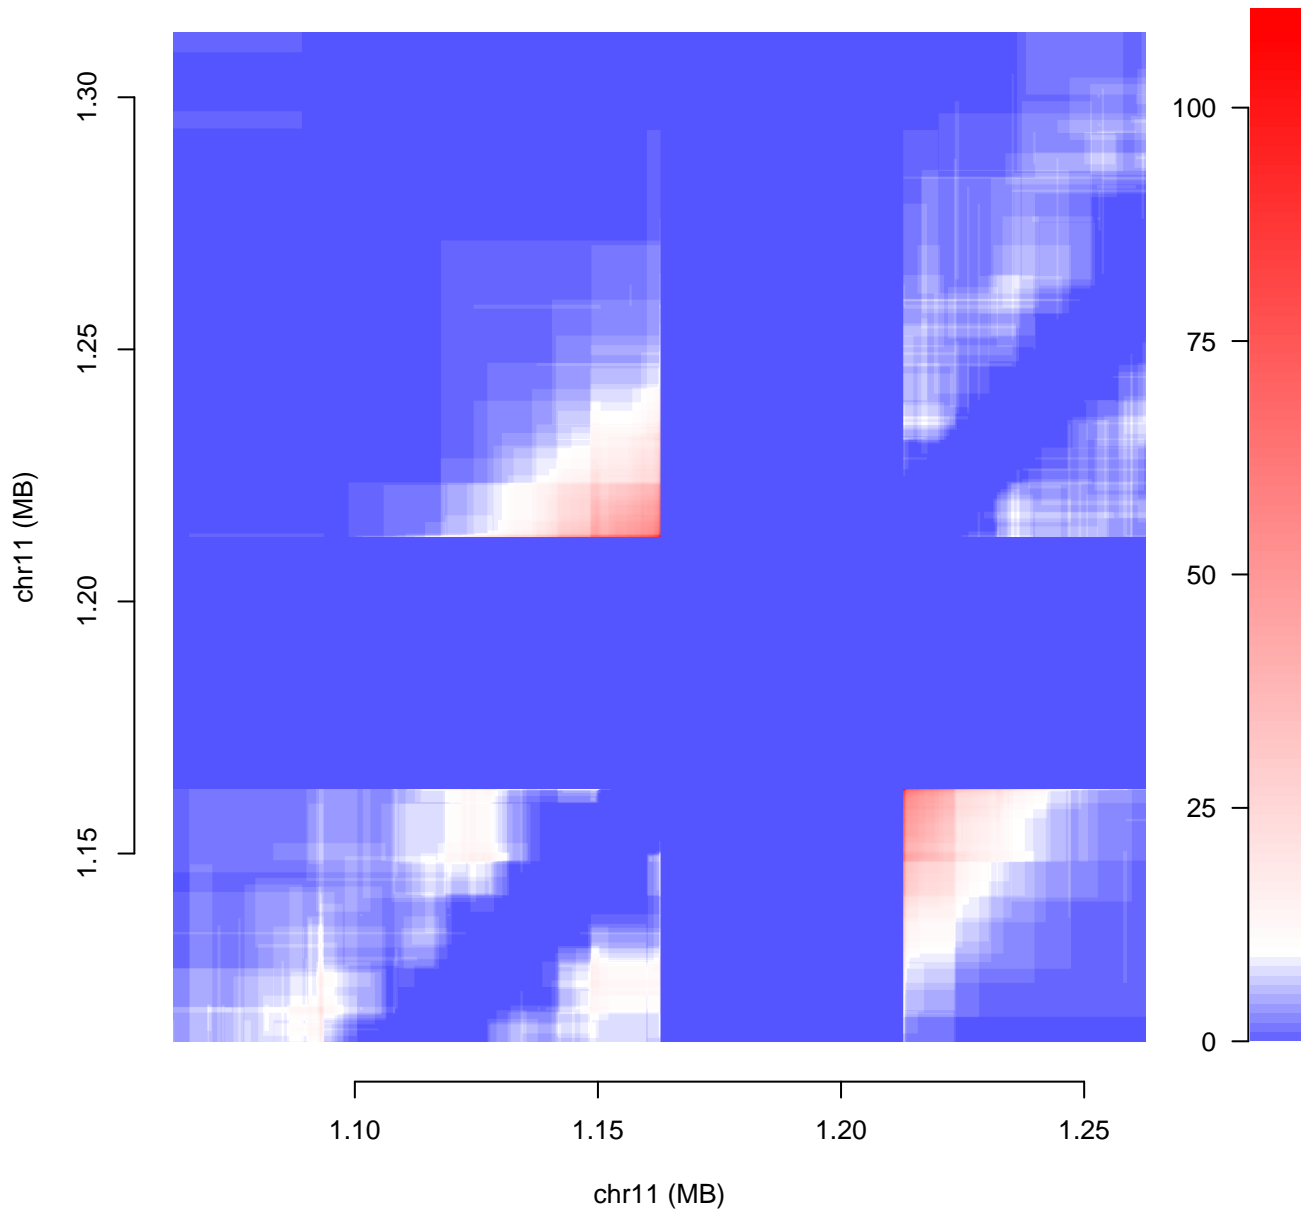

Supplement: Supplemental_Data.zip [file event_149.pdf › event_149.pdf]

Barcode

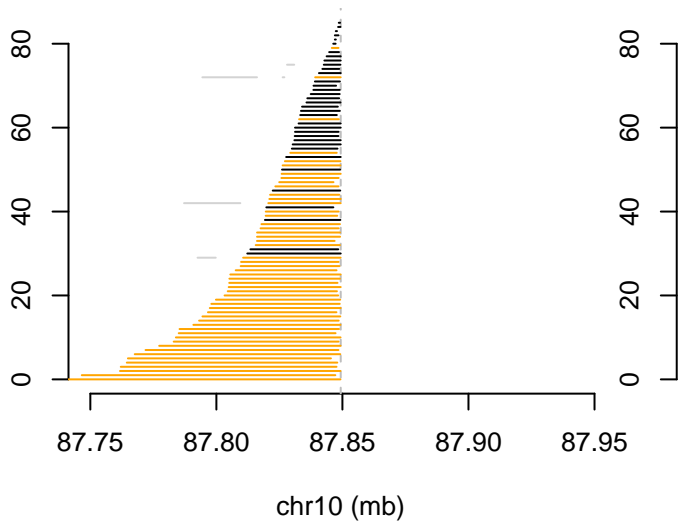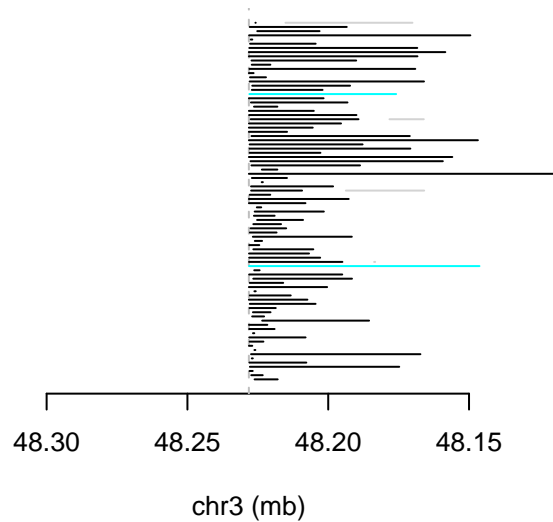

Copy number

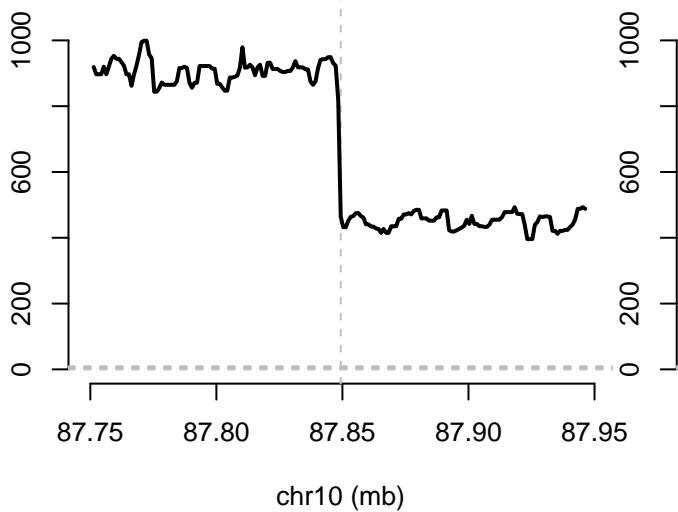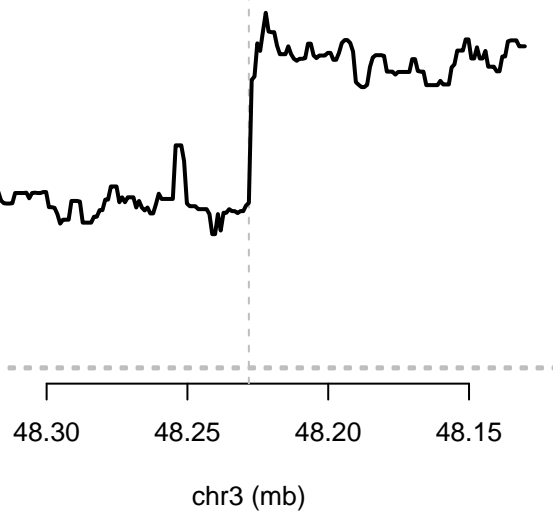

K562 chr10:87,849,333::chr3:48,228,179++

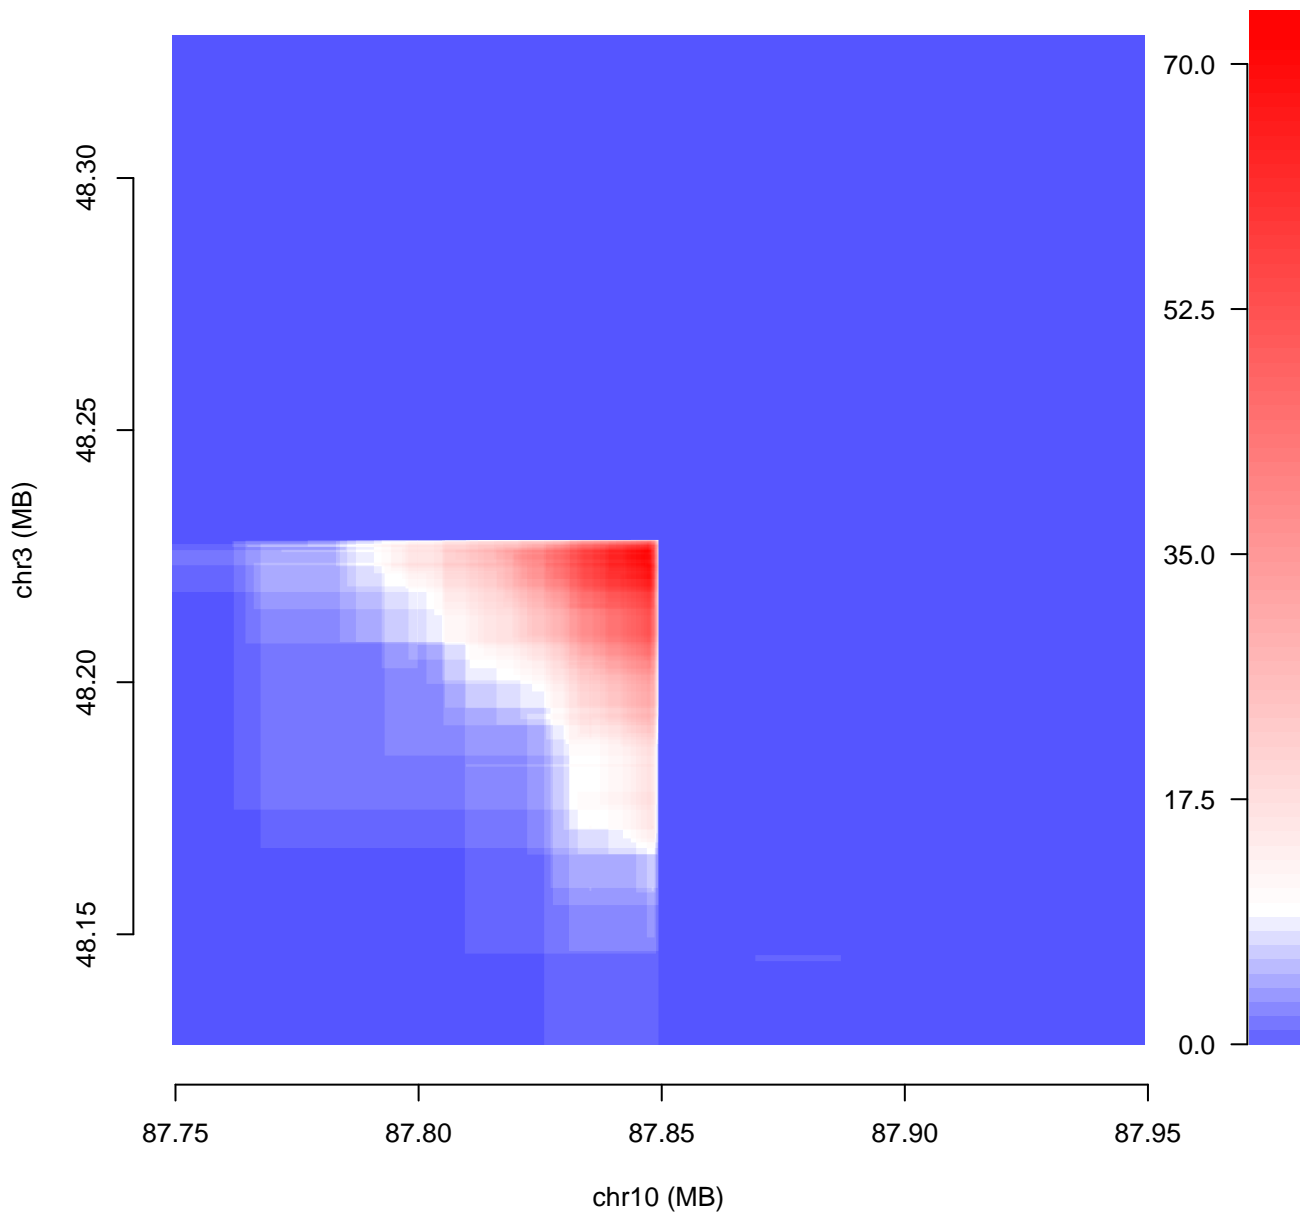

Supplement: Supplemental_Data.zip [file event_15.pdf › event_15.pdf]

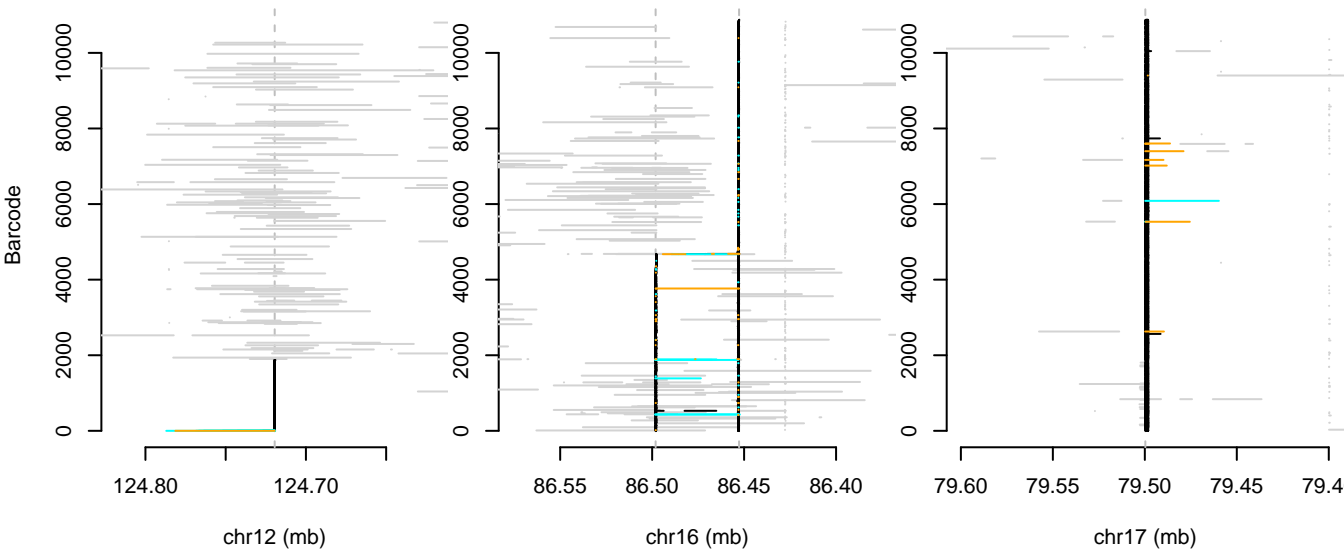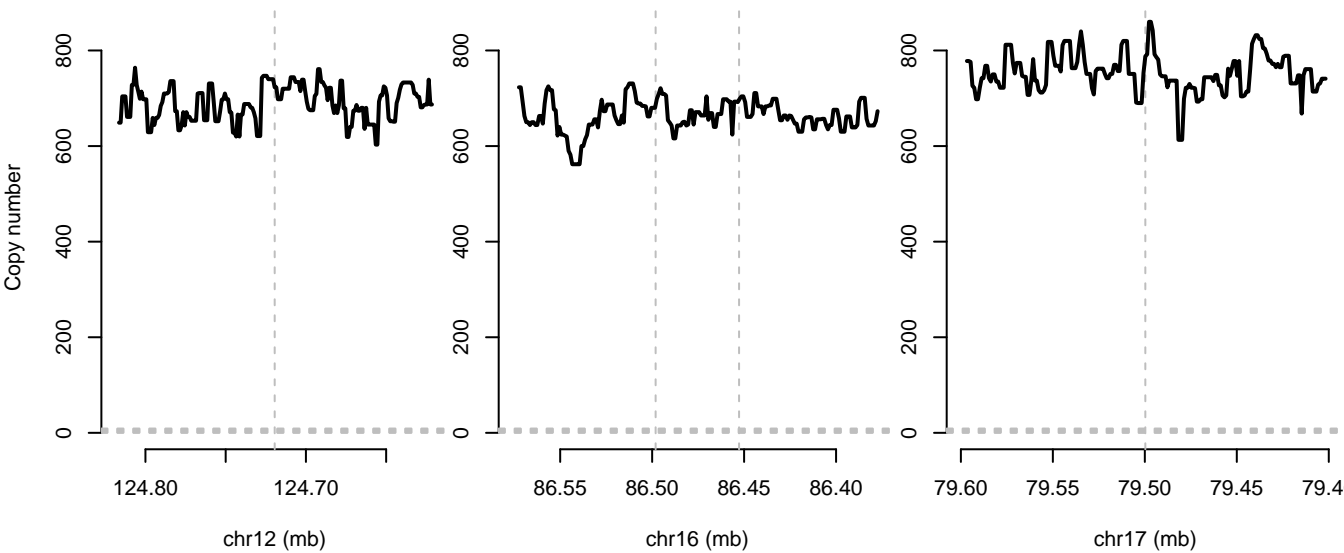

K562 chr16:86,498,108::chr12:124,719,463+-

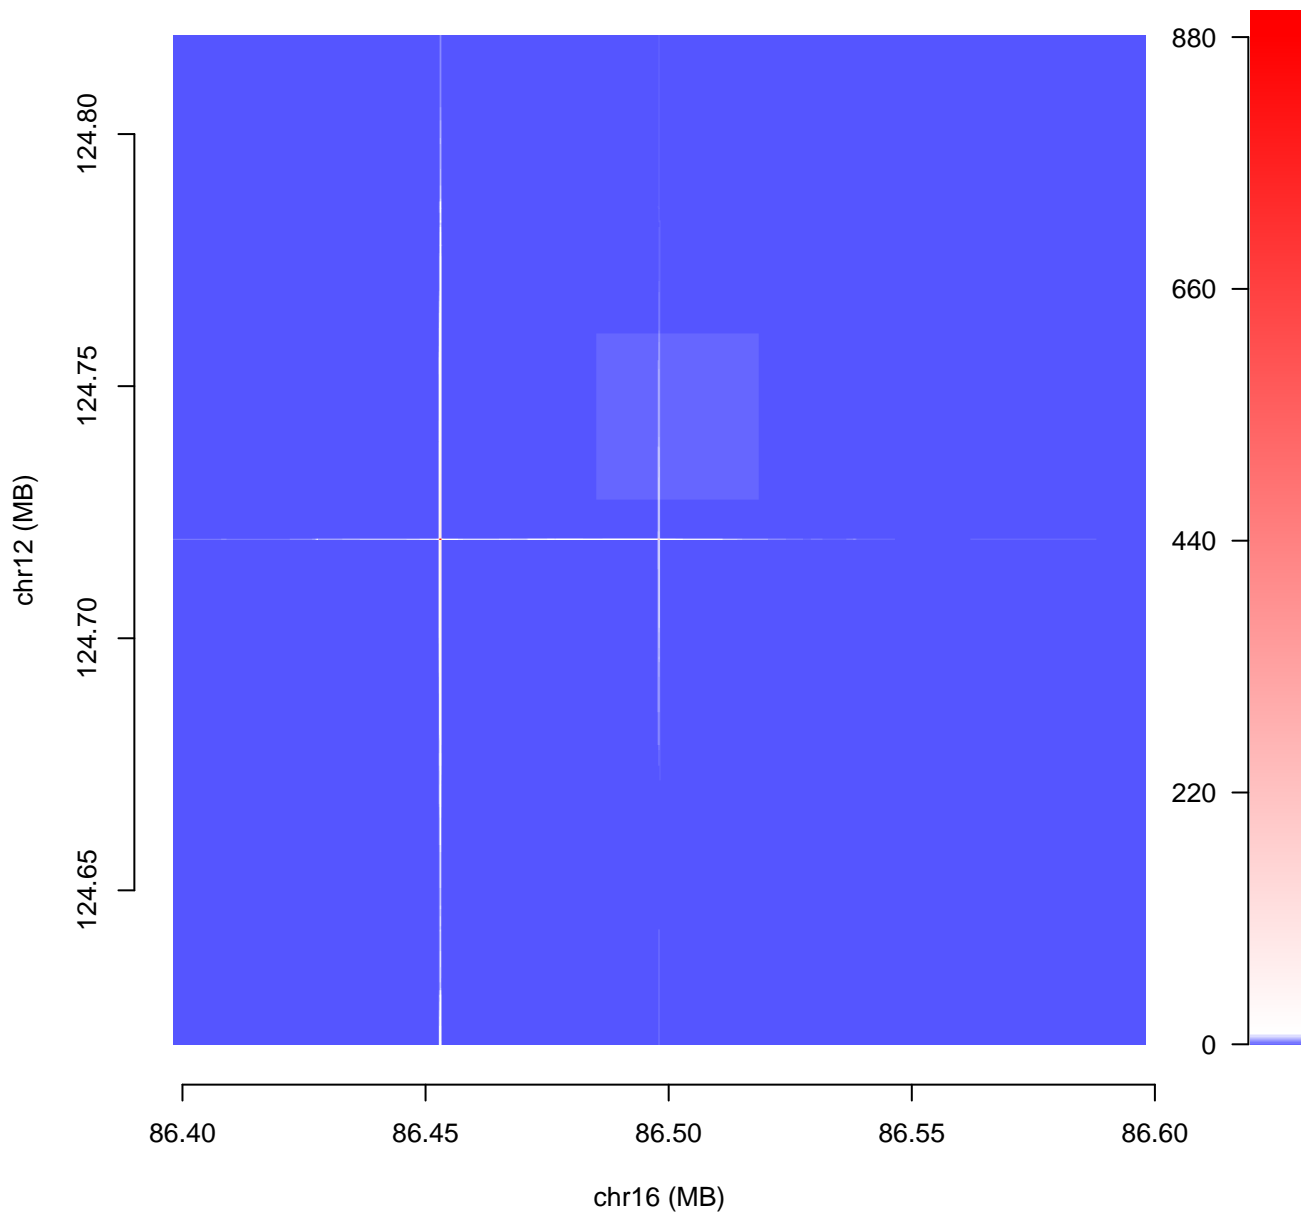

K562 chr16:86,498,108::chr16:86,452,750+-

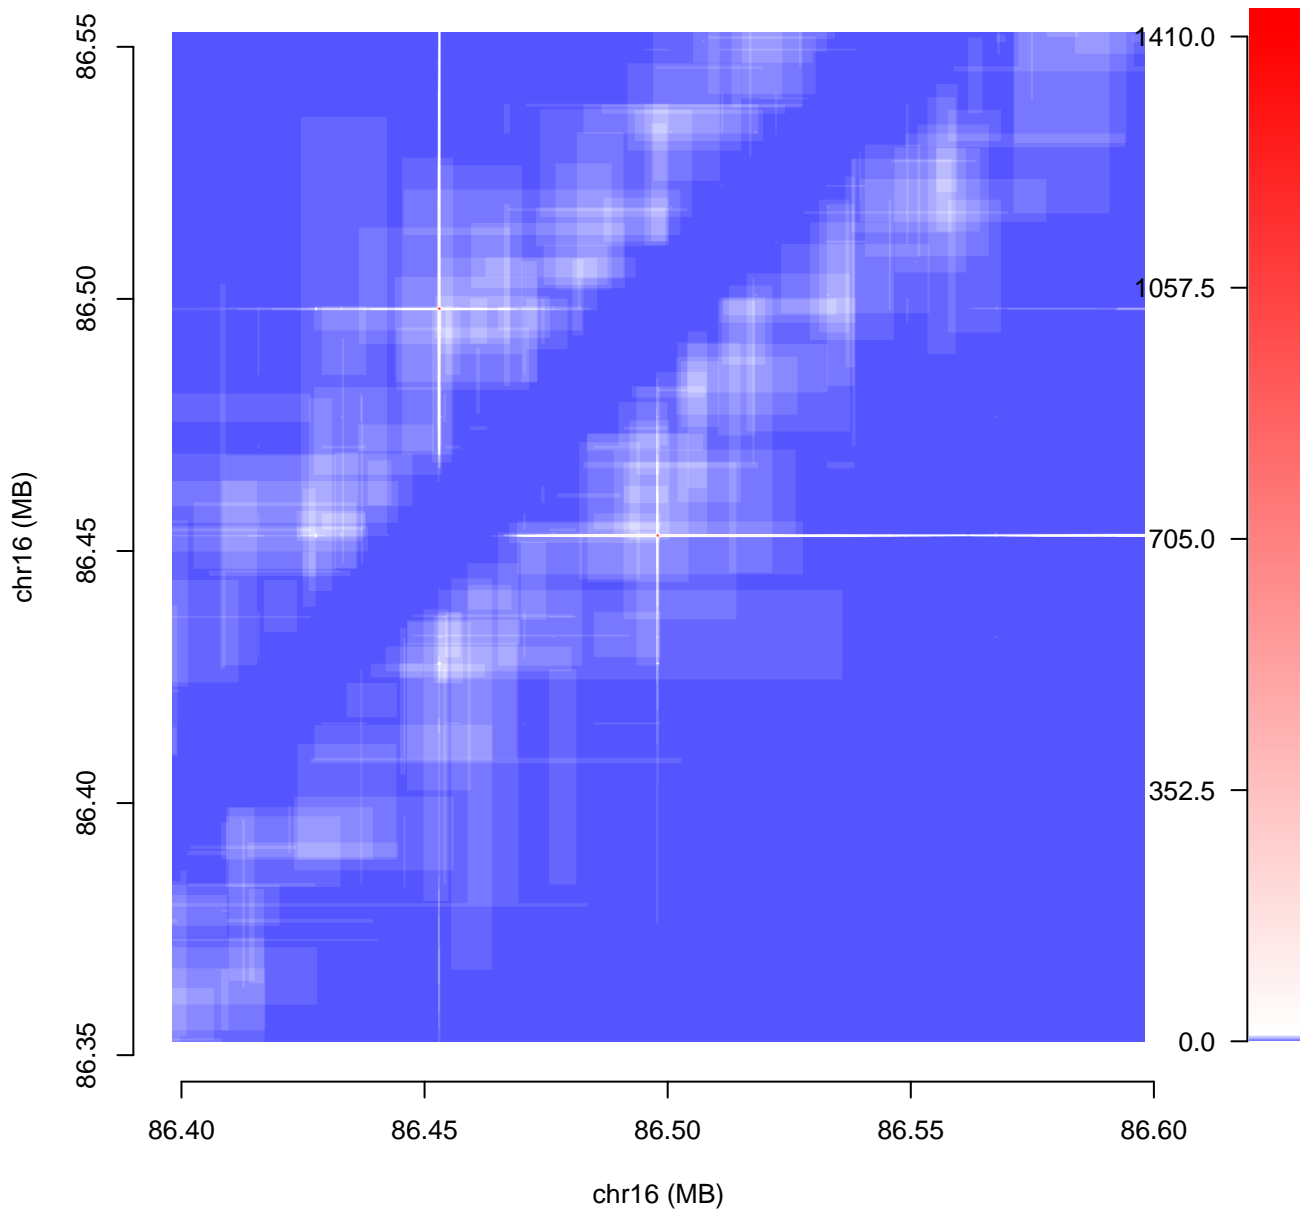

K562 chr17:79,499,722::chr16:86,452,750+-

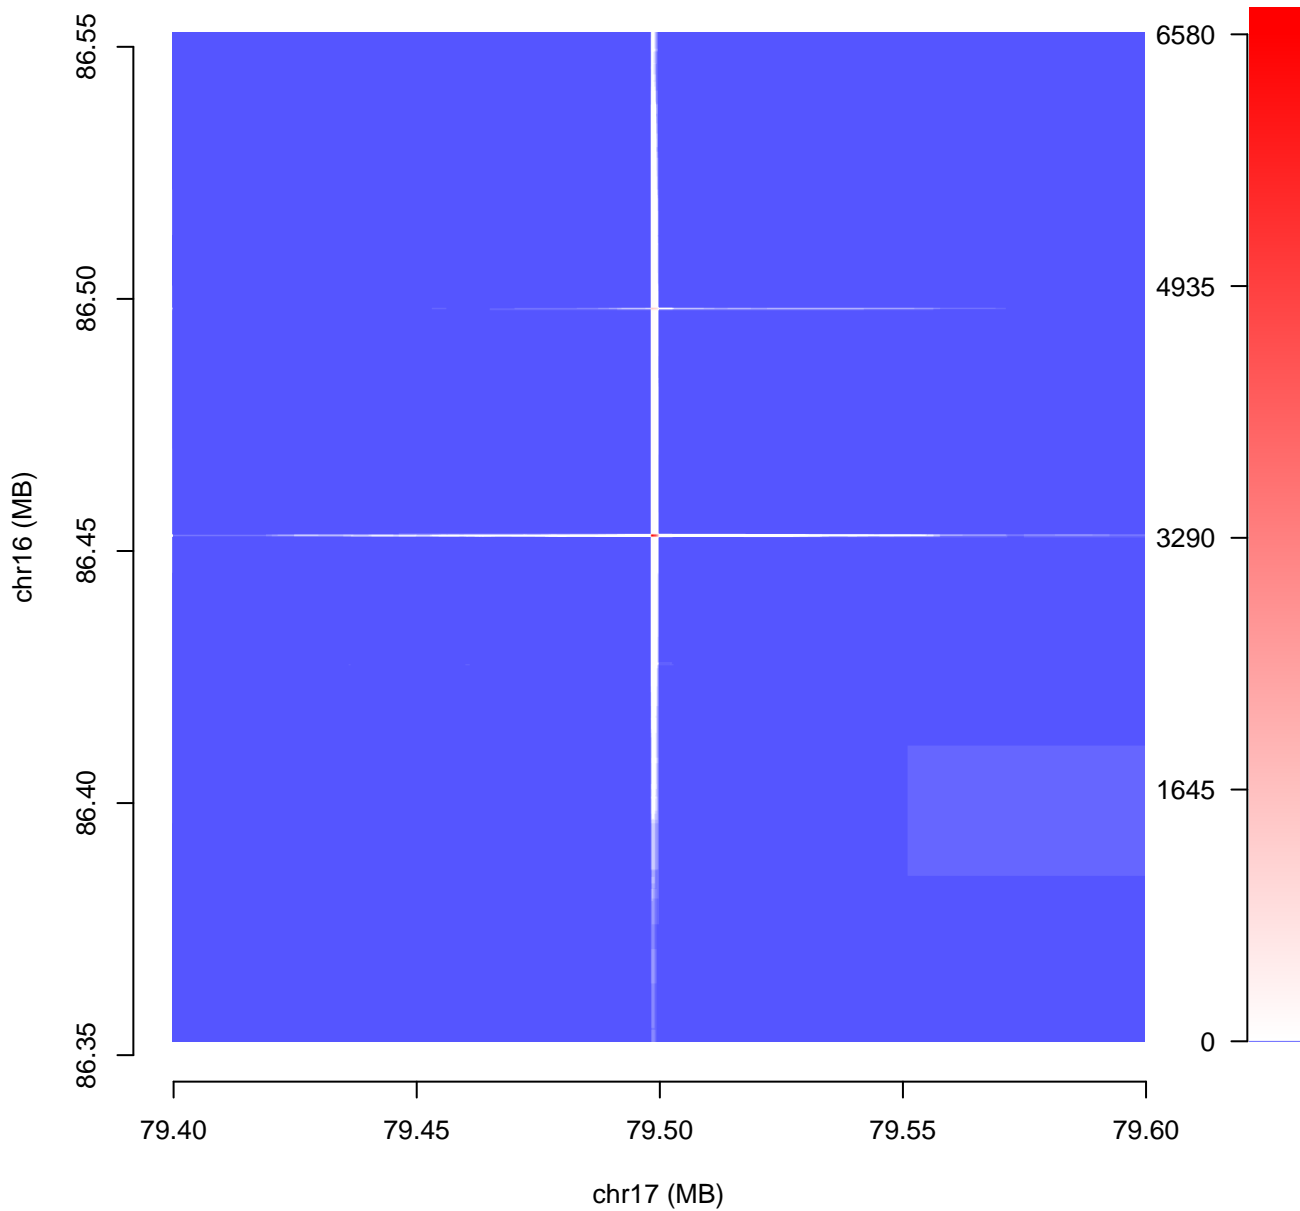

Supplement: Supplemental_Data.zip [file event_150.pdf › event_150.pdf]

Barcode

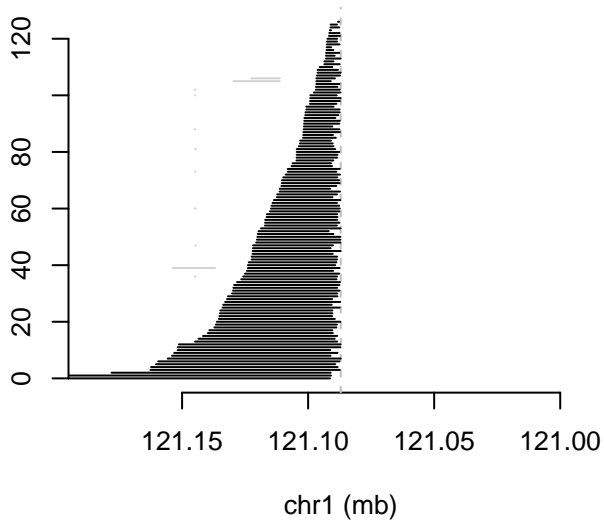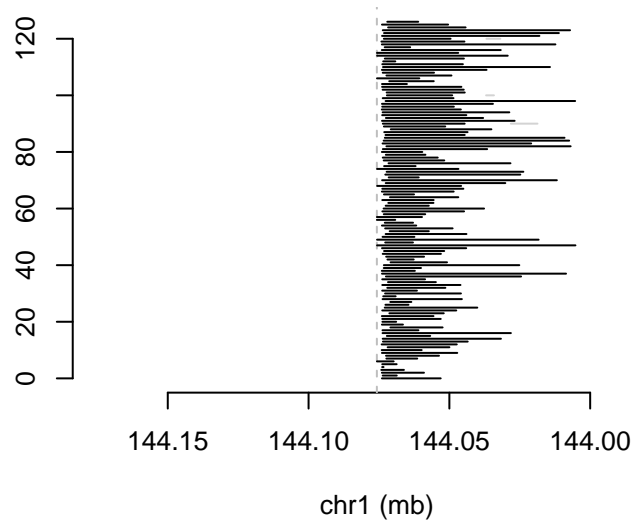

Copy number

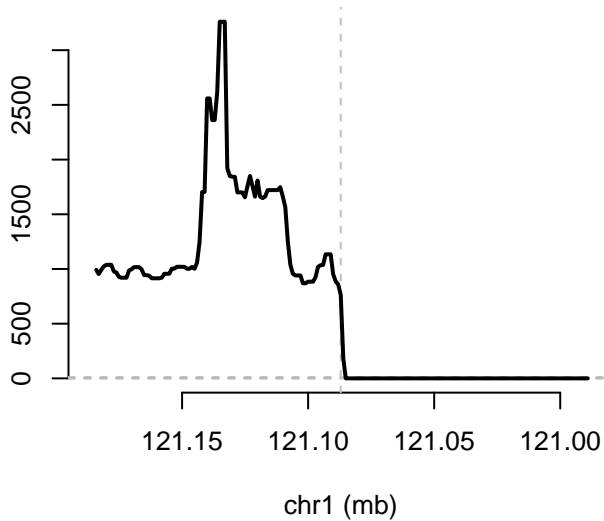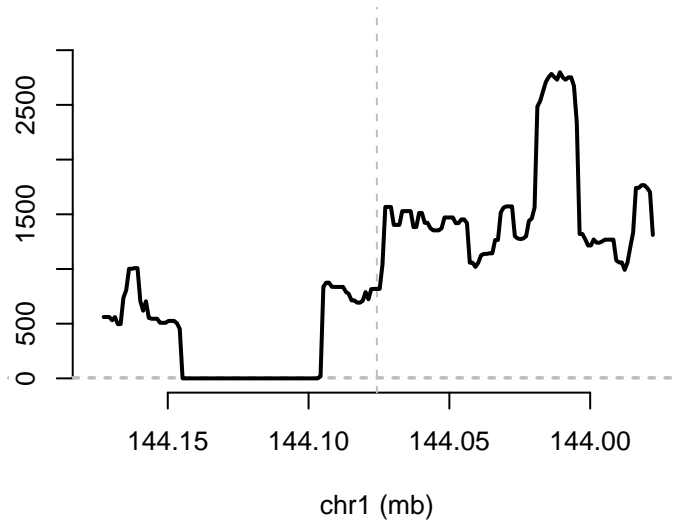

K562 chr1:121,087,062::chr1:144,075,749-+

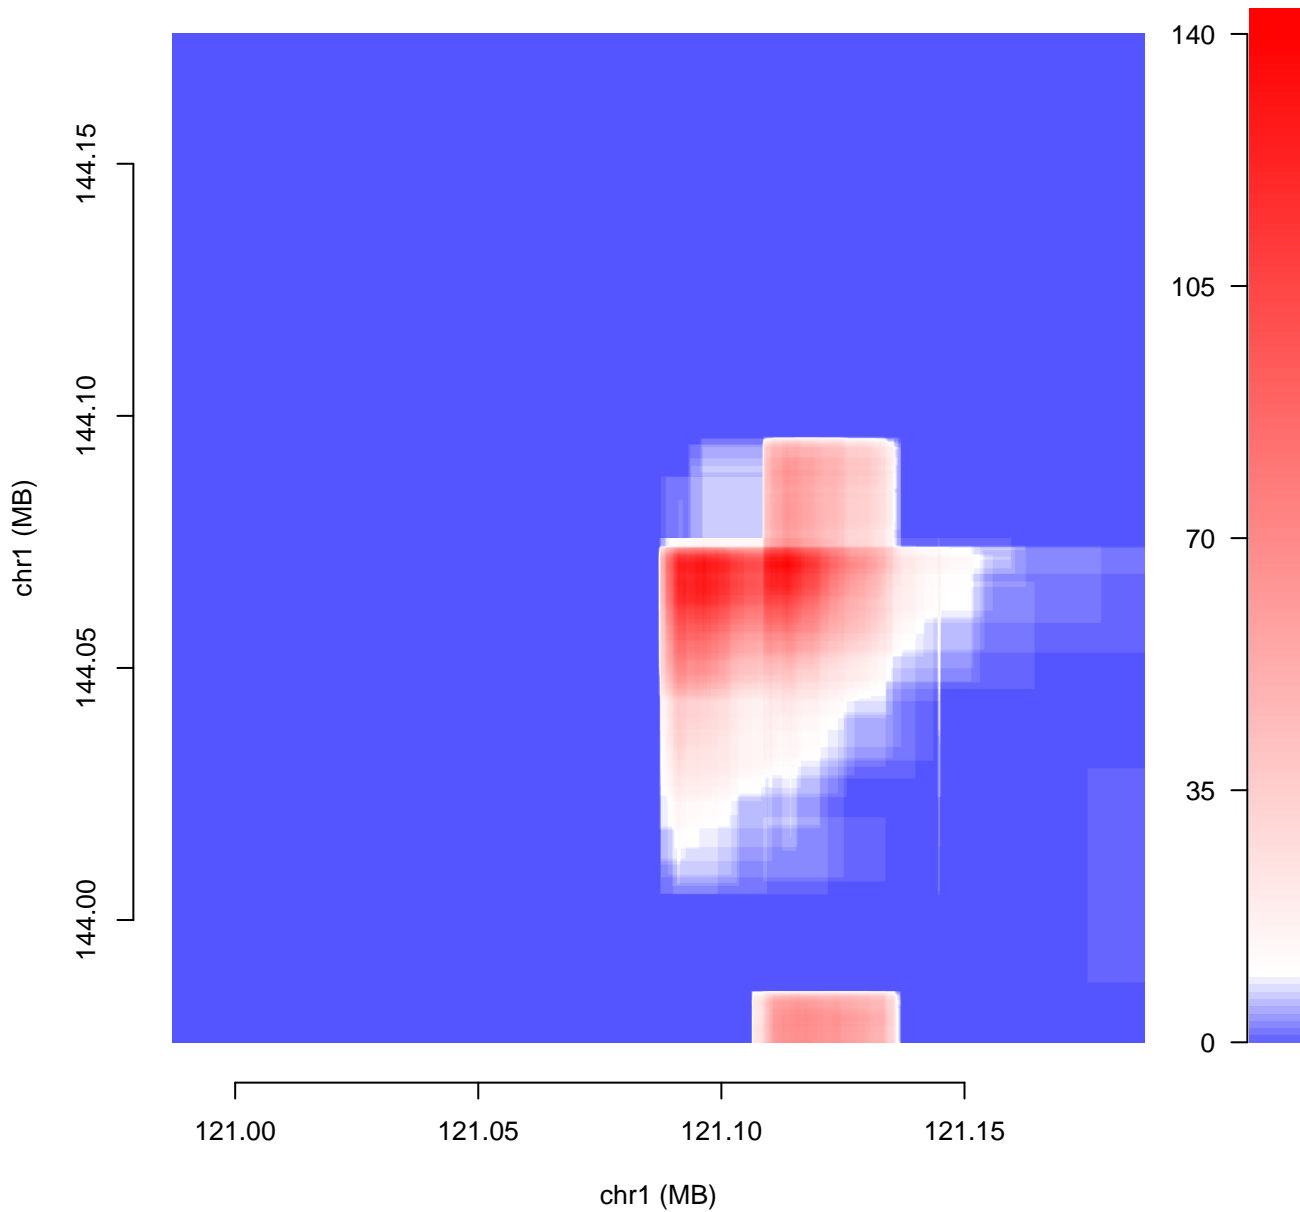

Supplement: Supplemental_Data.zip [file event_151.pdf › event_151.pdf]

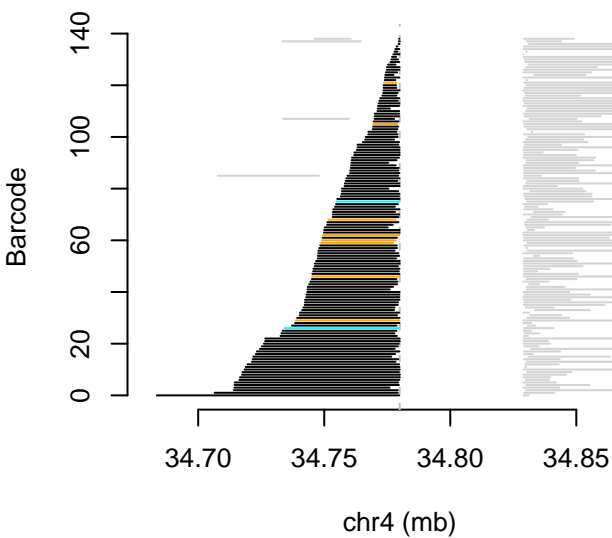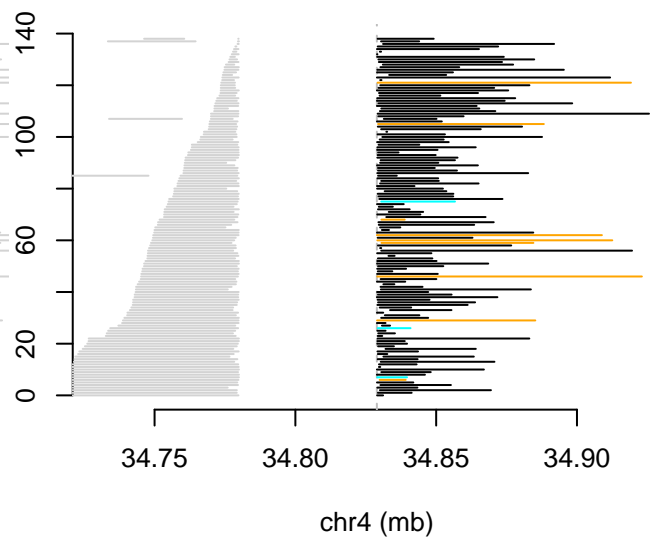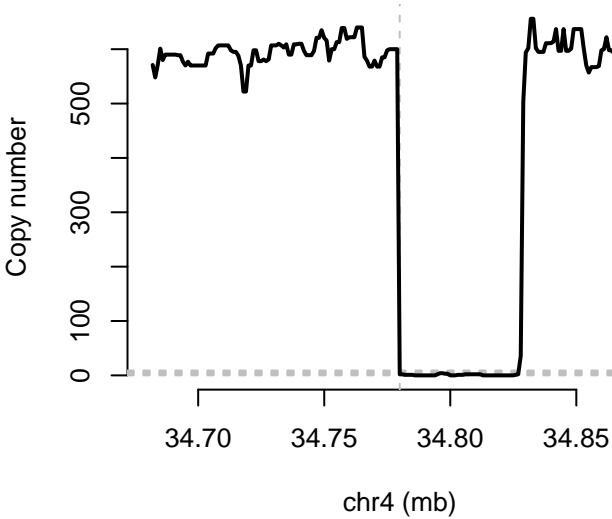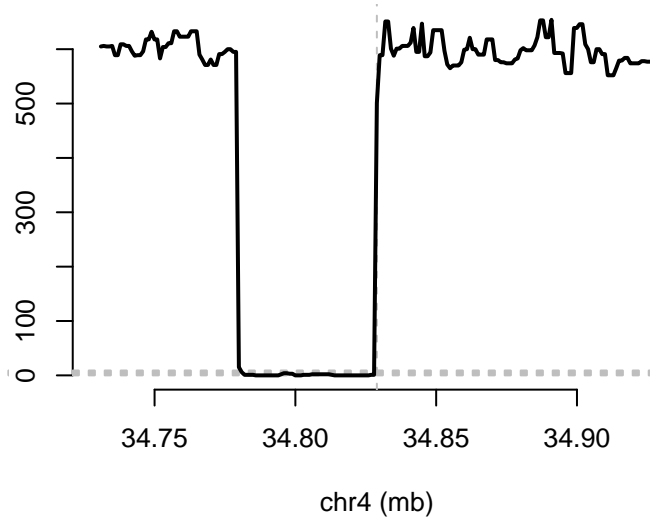

K562 chr4:34,779,954::chr4:34,828,938+-

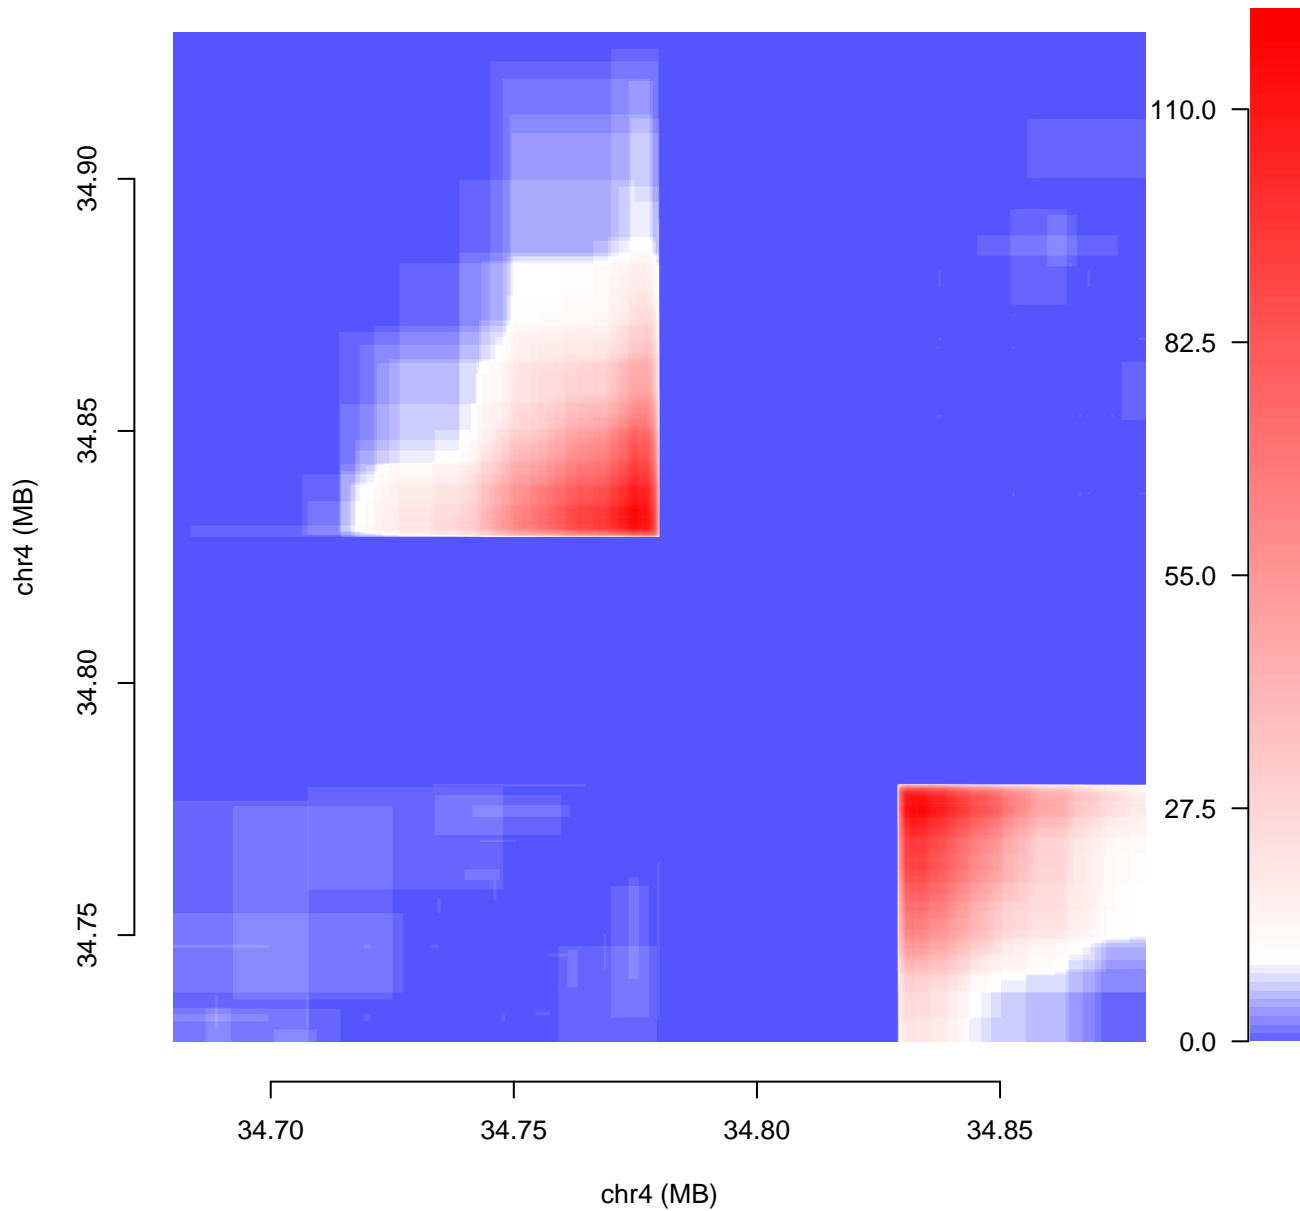

Supplement: Supplemental_Data.zip [file event_152.pdf › event_152.pdf]

Barcode

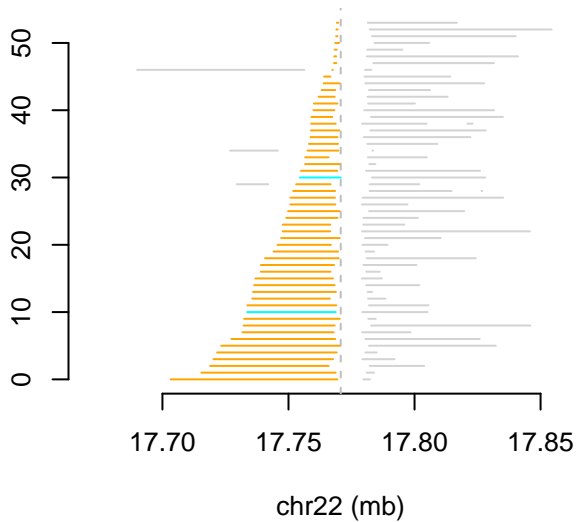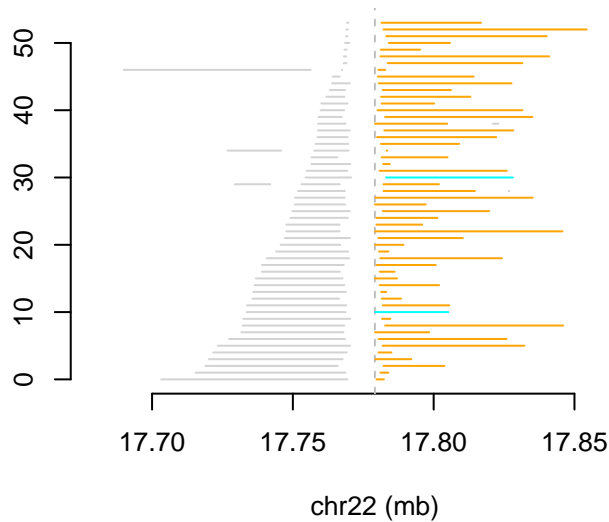

Copy number

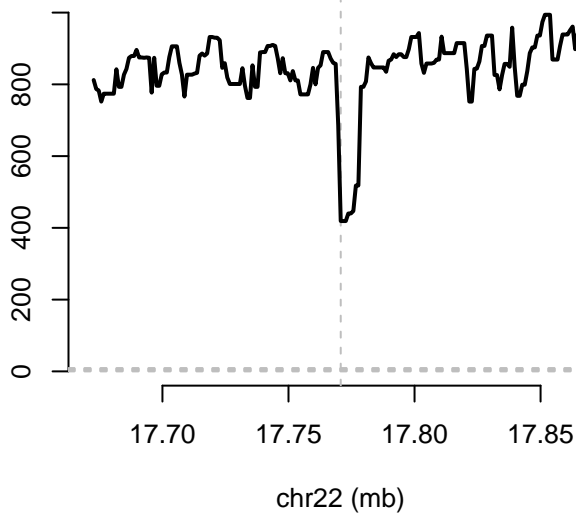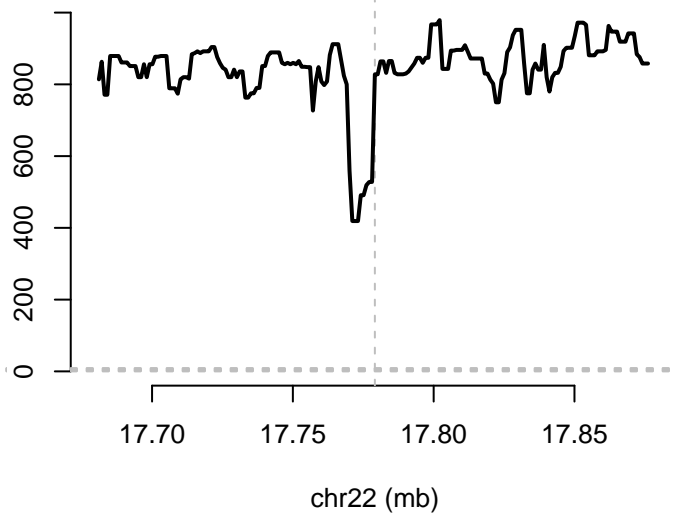

K562 chr22:17,770,728::chr22:17,779,124+-

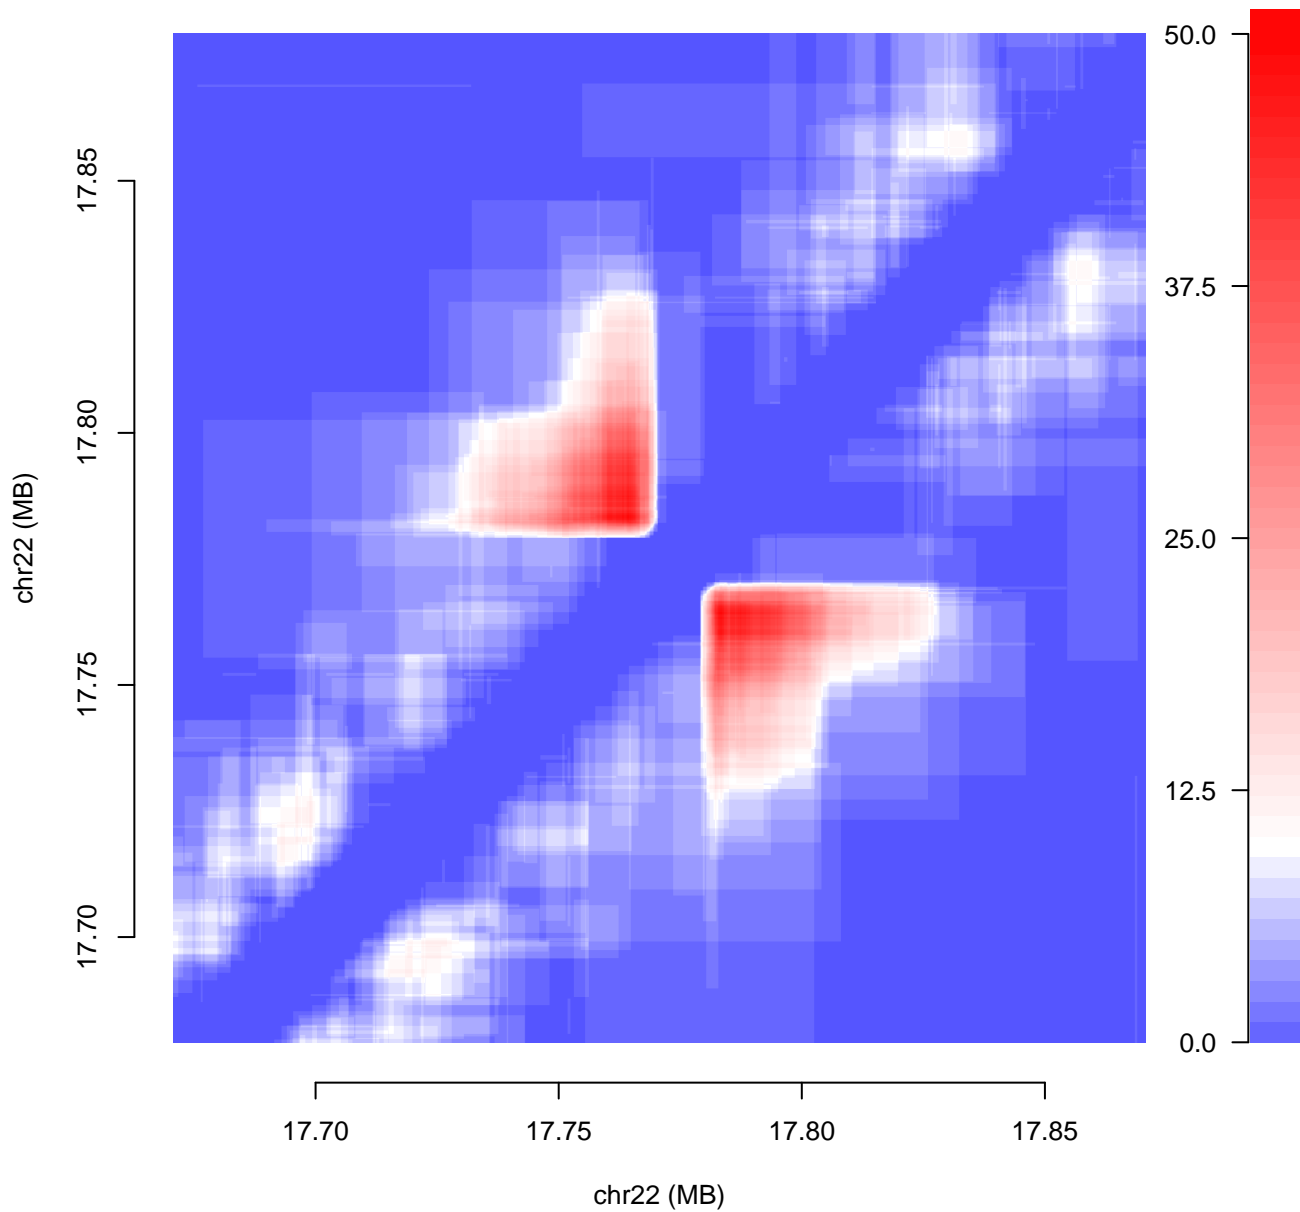

Supplement: Supplemental_Data.zip [file event_153.pdf › event_153.pdf]

Barcode

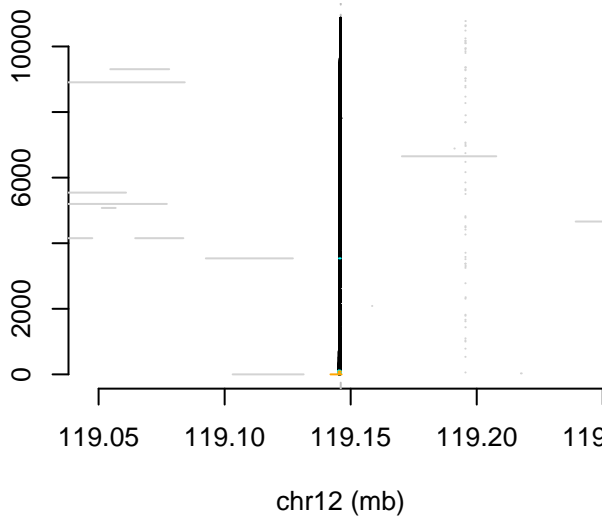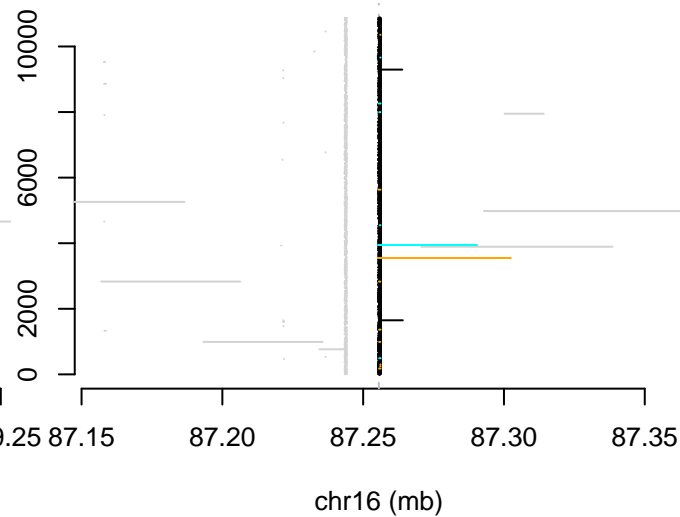

Copy number

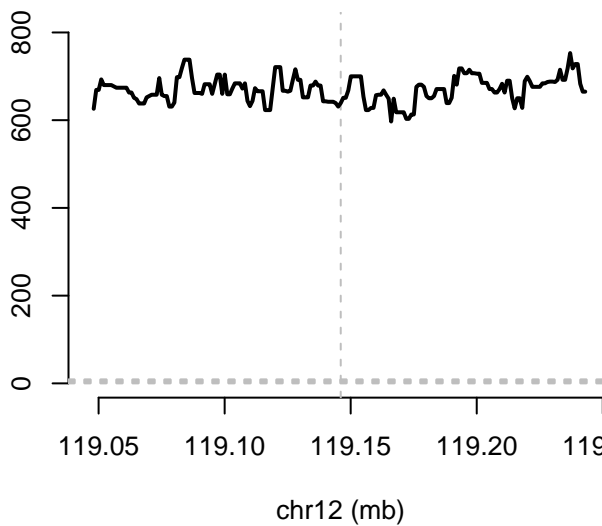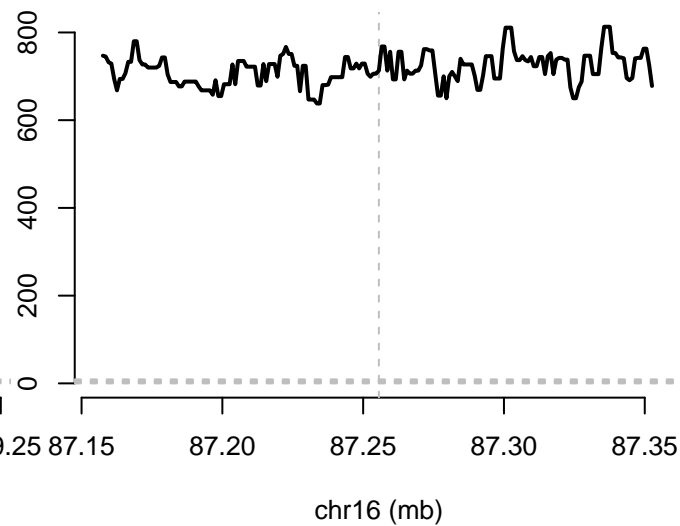

K562 chr12:119,146,054::chr16:87,255,582+-

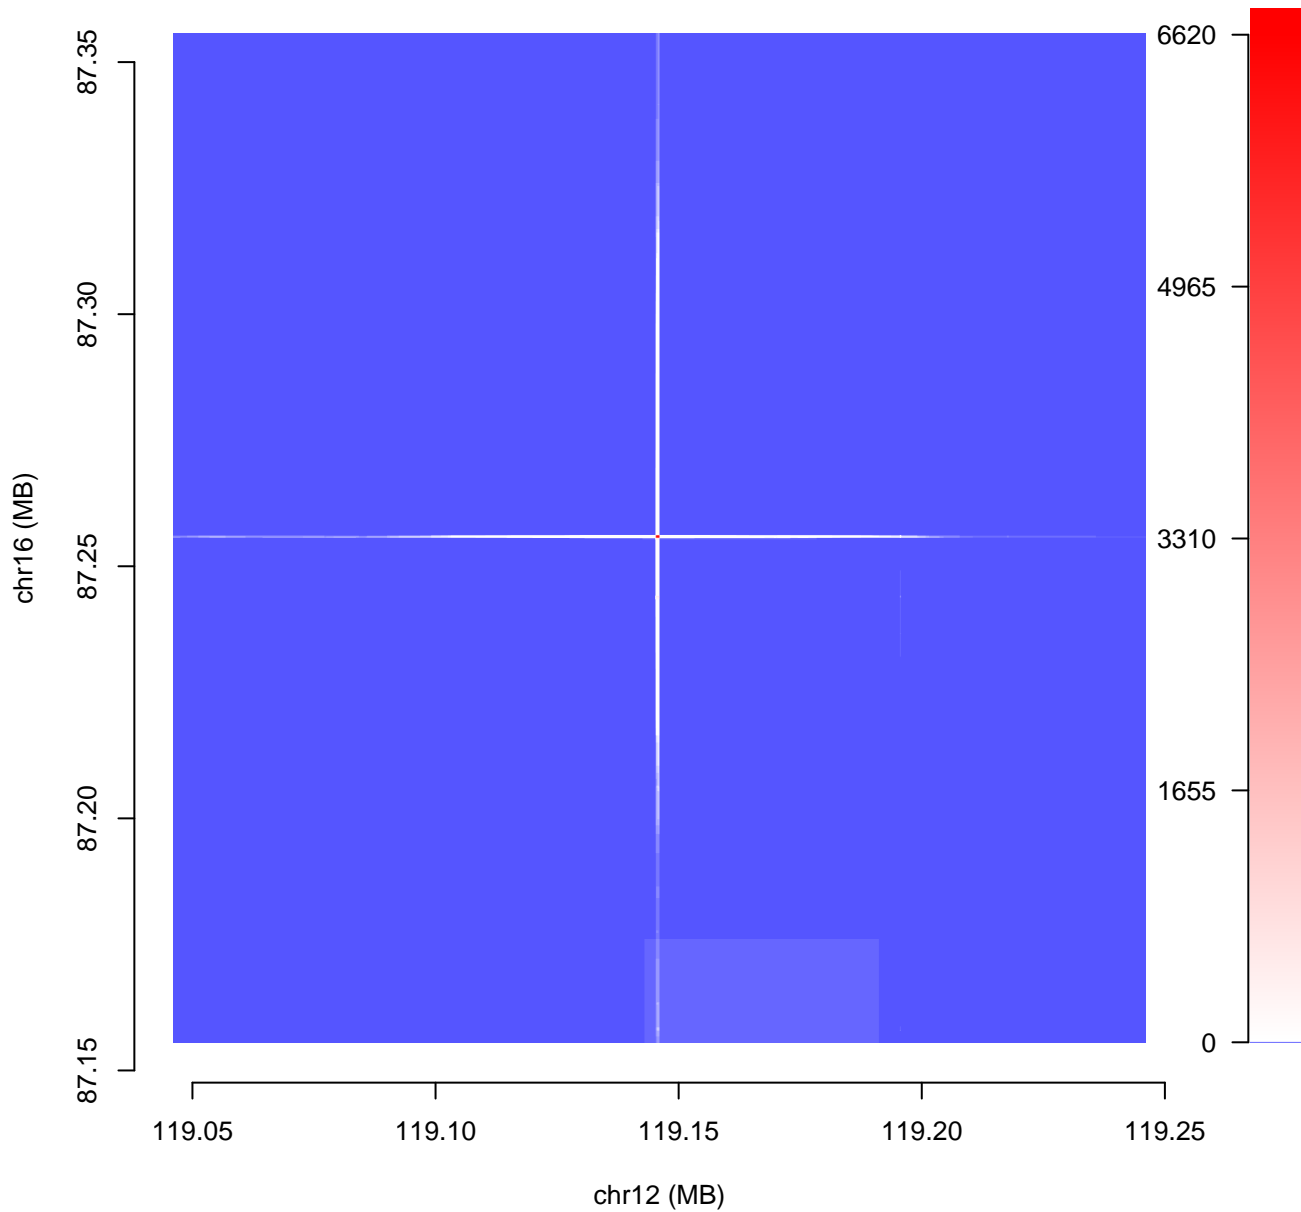

Supplement: Supplemental_Data.zip [file event_154.pdf › event_154.pdf]

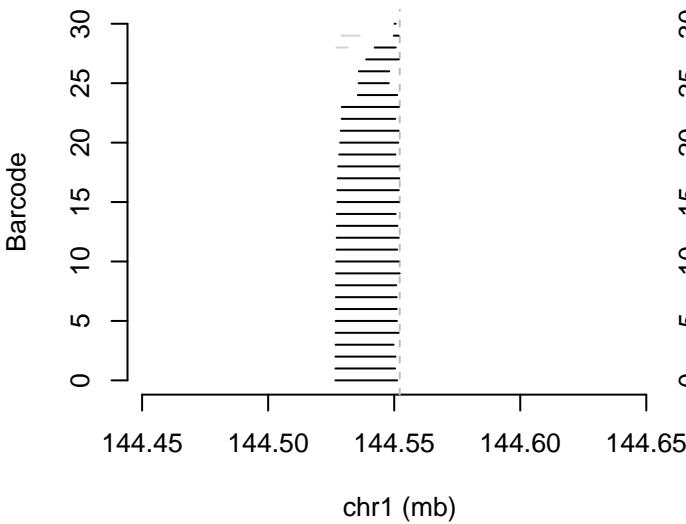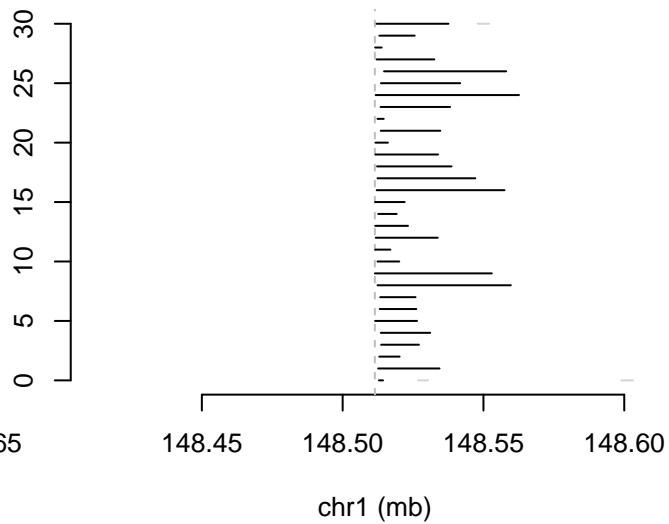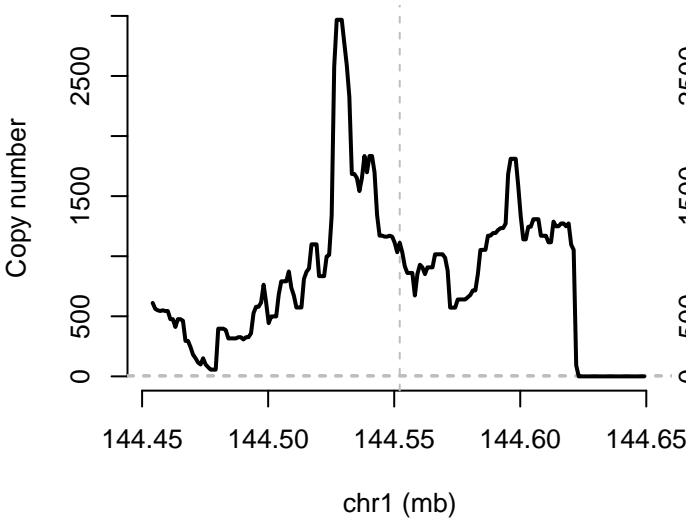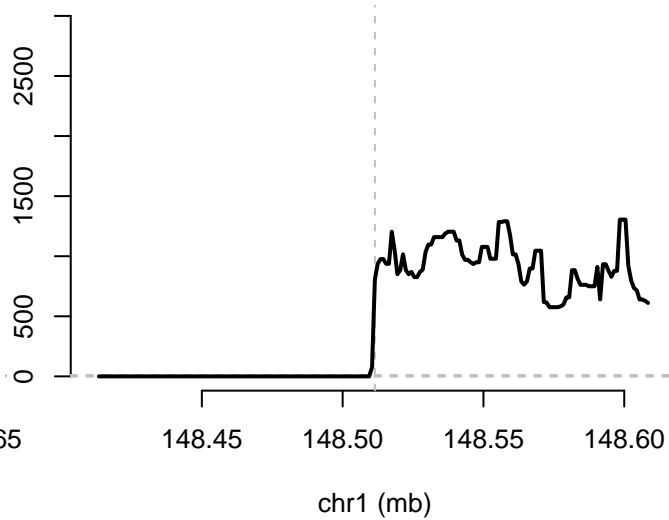

K562 chr1:144,552,198::chr1:148,511,442+-

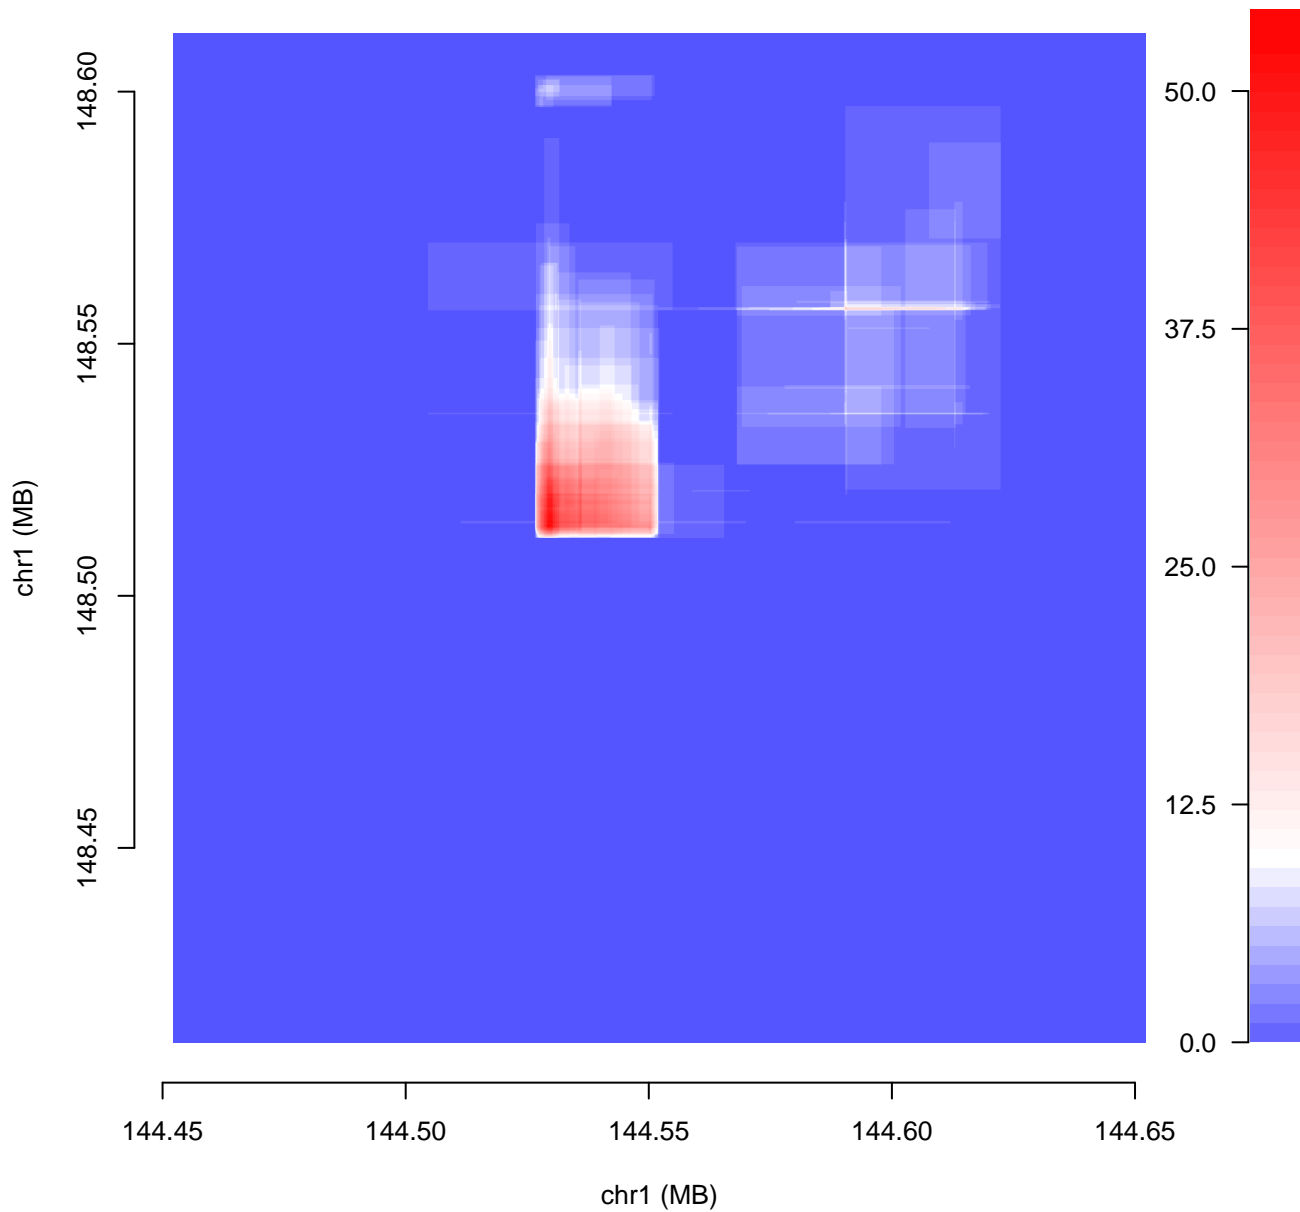

Supplement: Supplemental_Data.zip [file event_155.pdf › event_155.pdf]

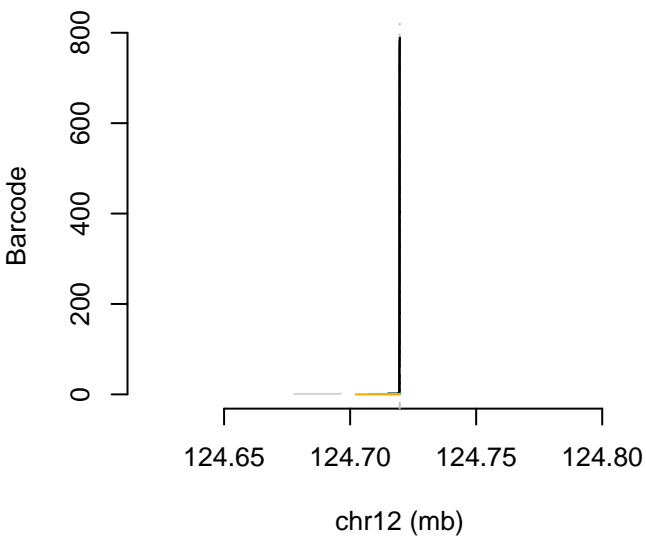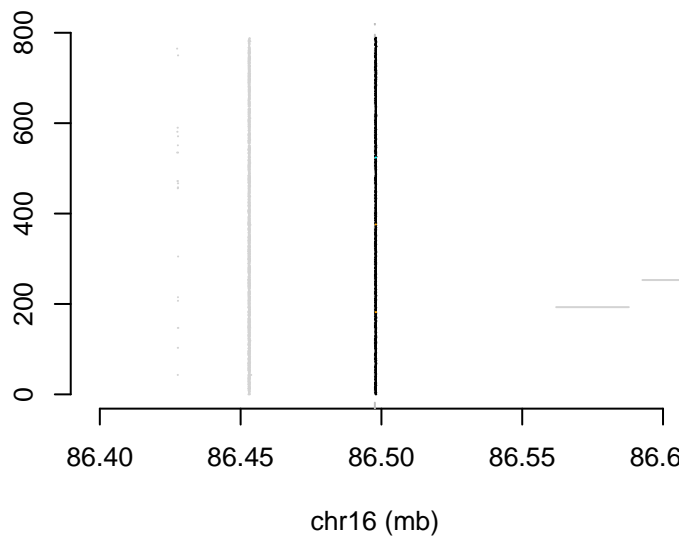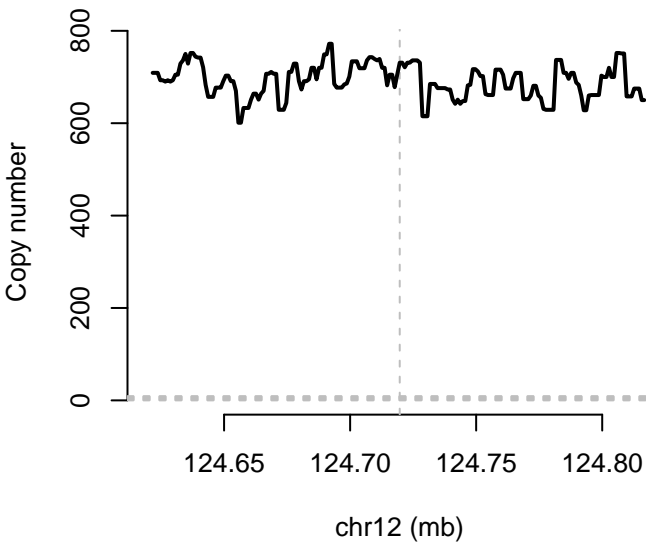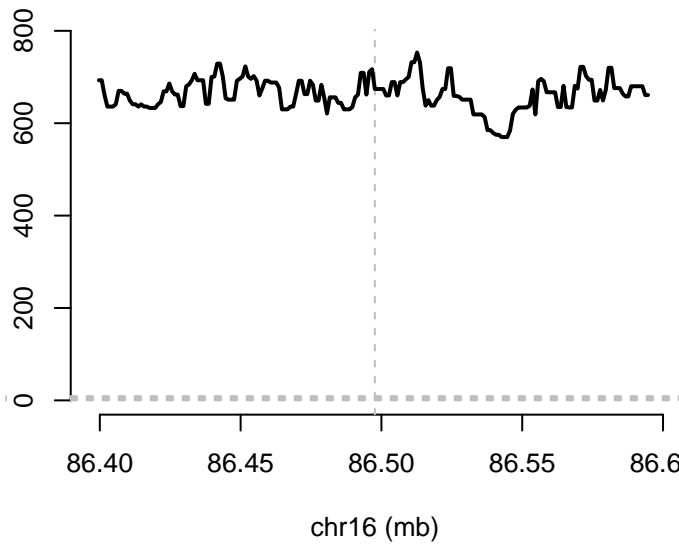

K562 chr16:86,497,677::chr12:124,719,684--+

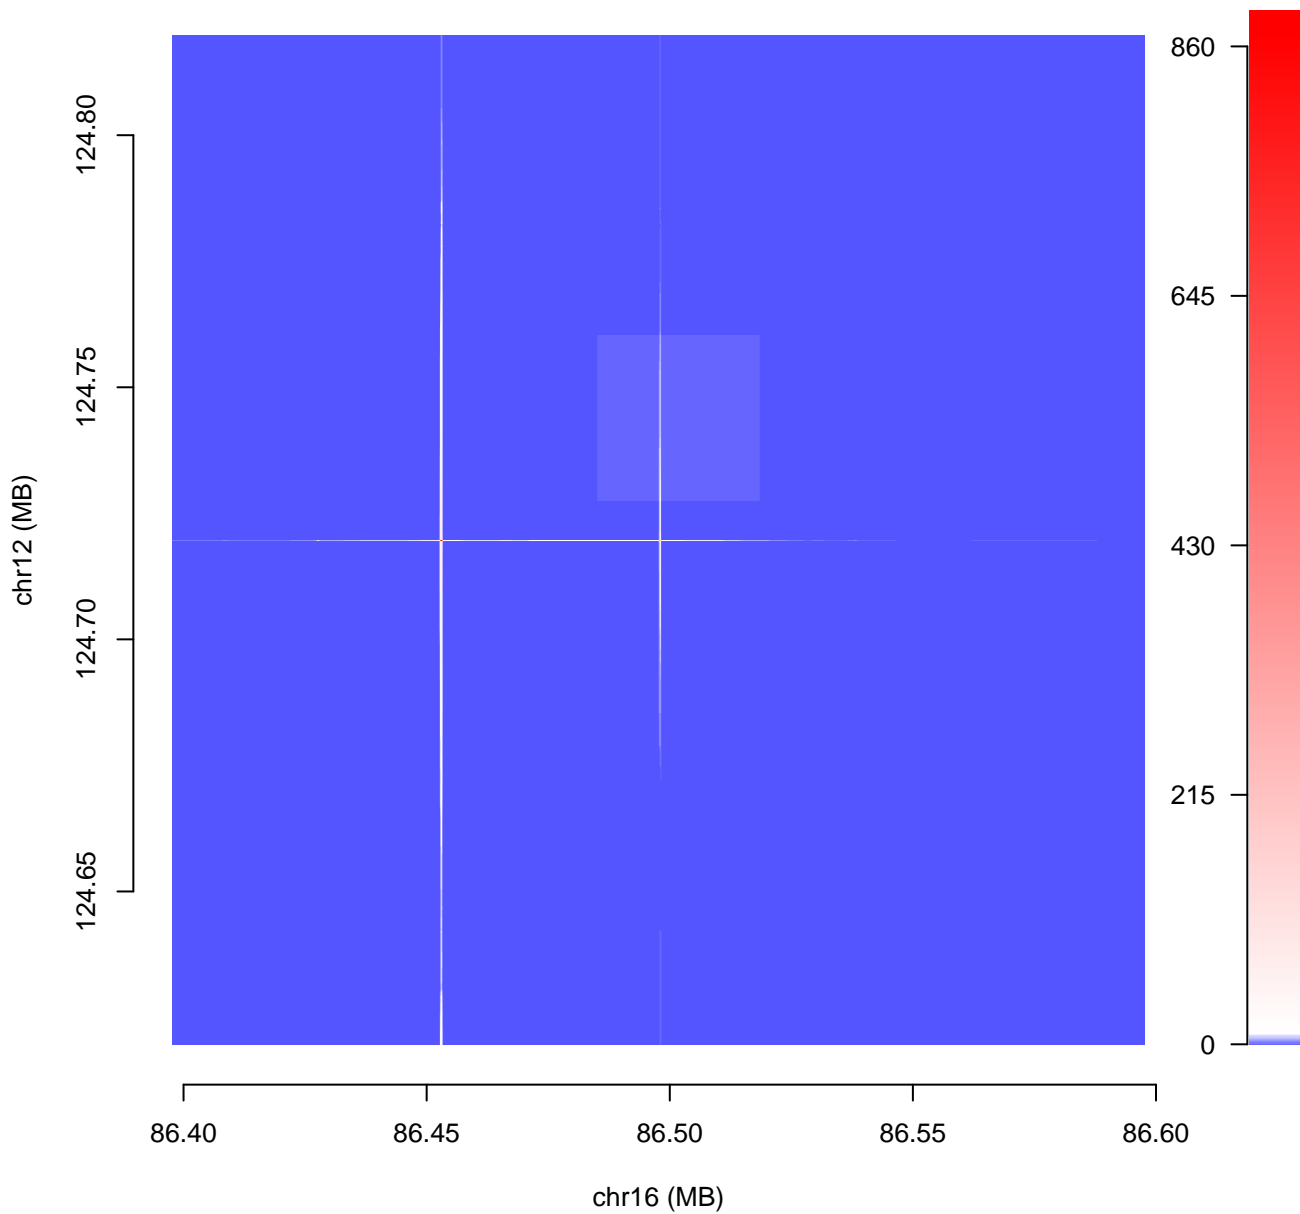

Supplement: Supplemental_Data.zip [file event_156.pdf › event_156.pdf]

Barcode

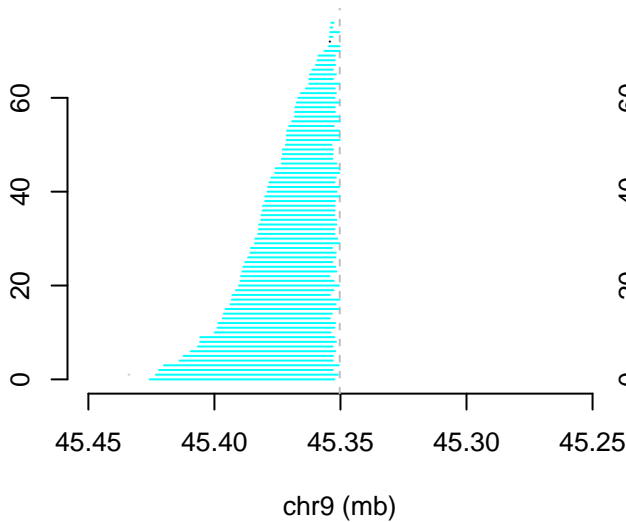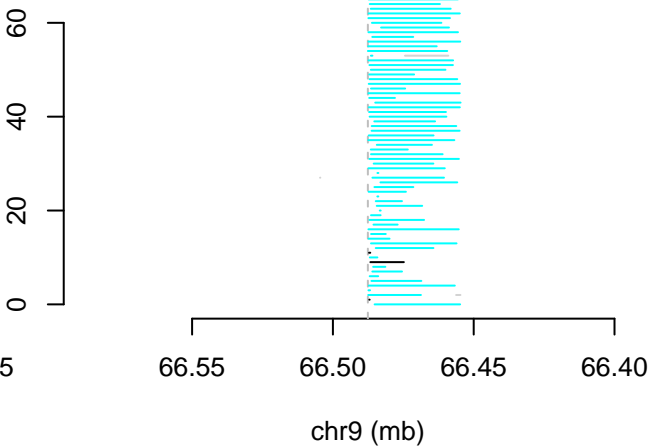

Copy number

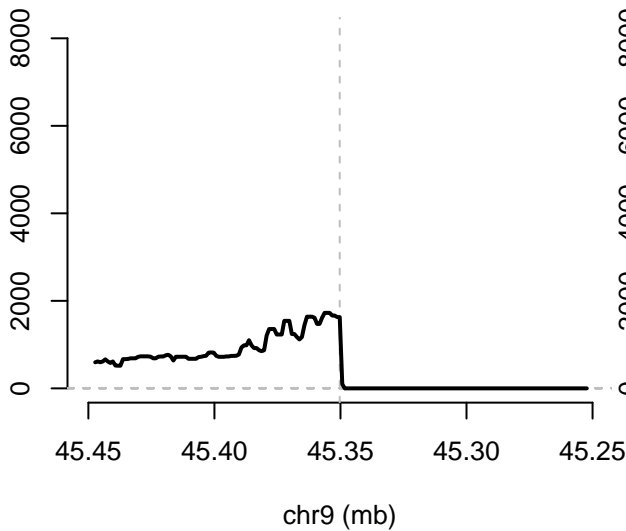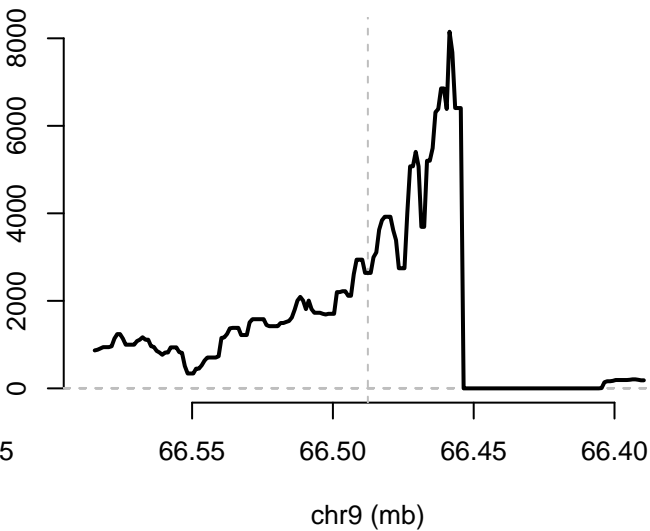

K562 chr9:66,487,583::chr9:45,350,288+-

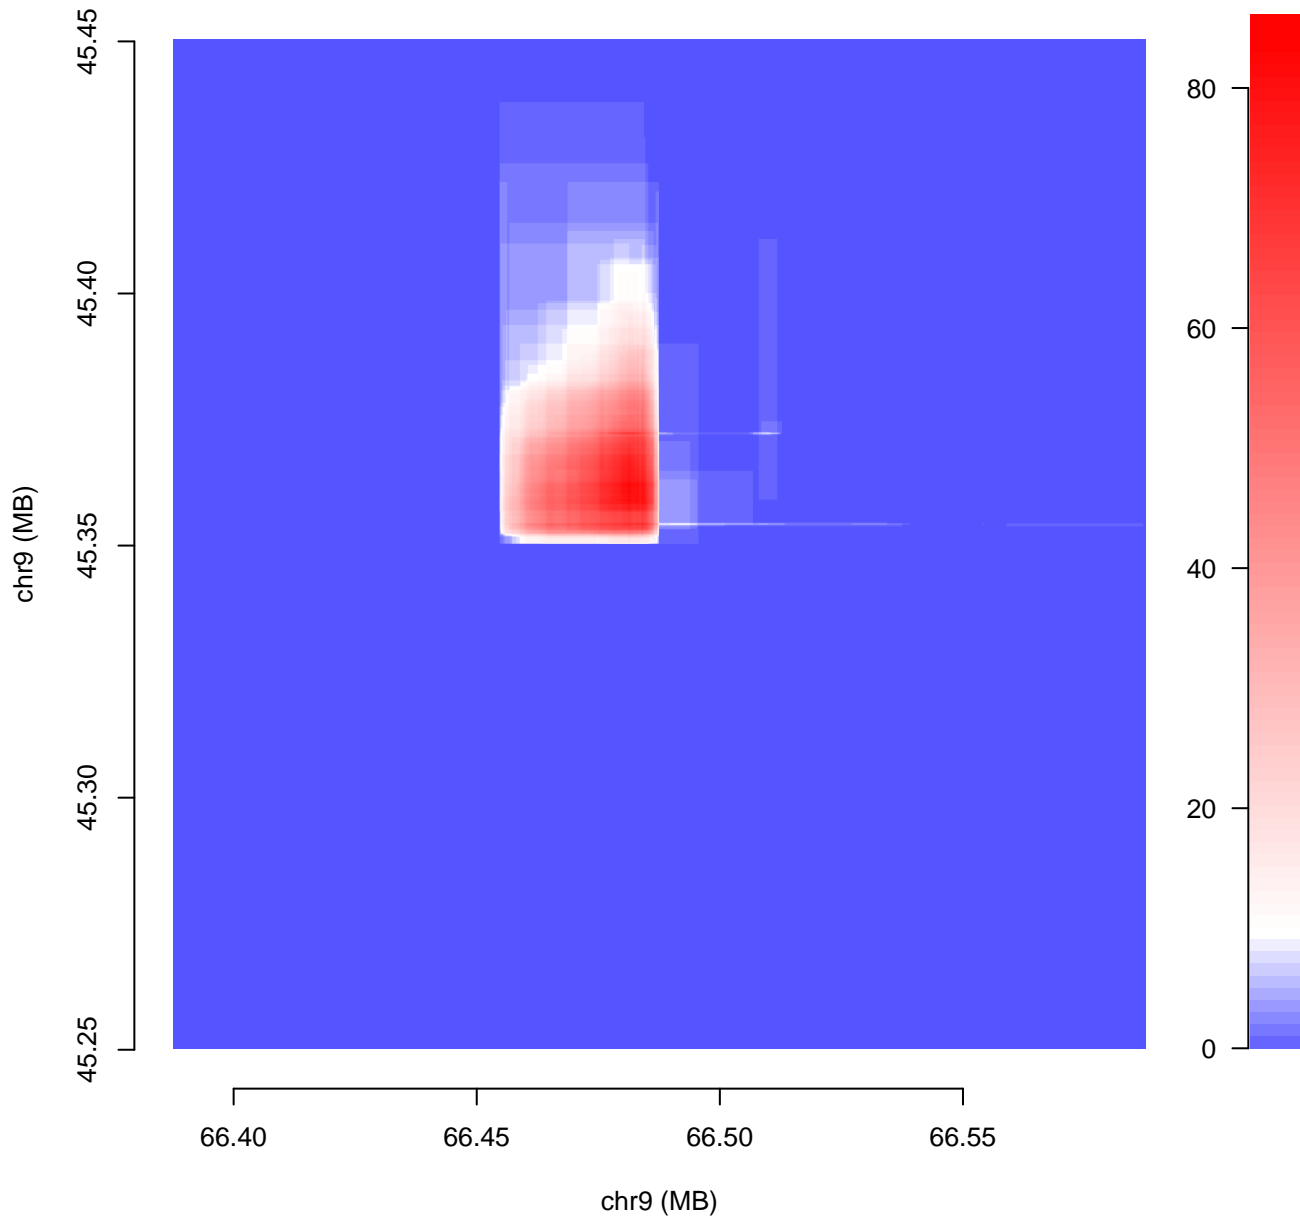

Supplement: Supplemental_Data.zip [file event_157.pdf › event_157.pdf]

Barcode

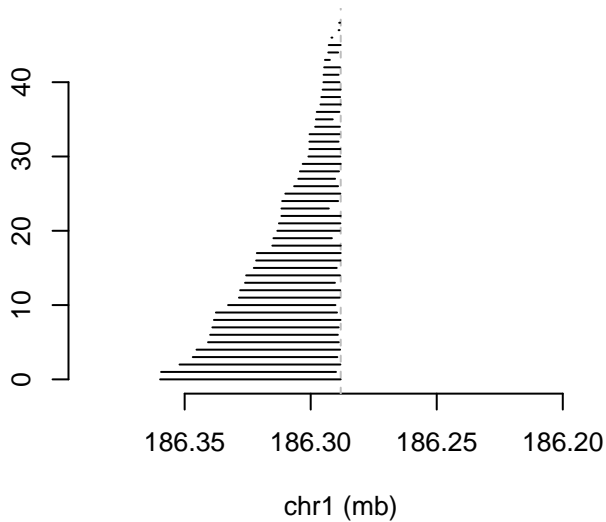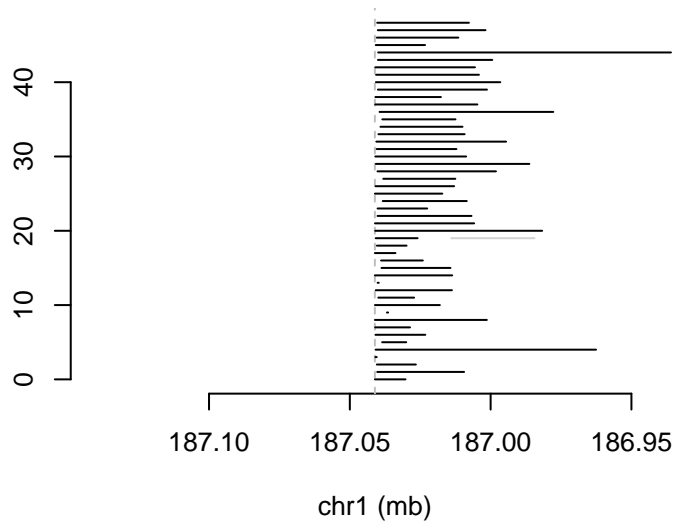

Copy number

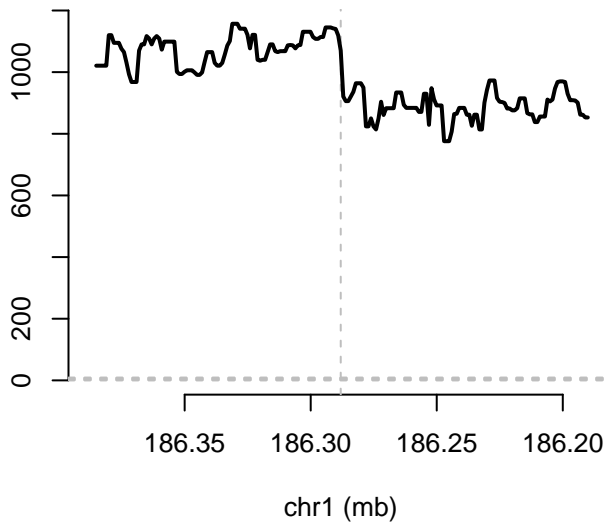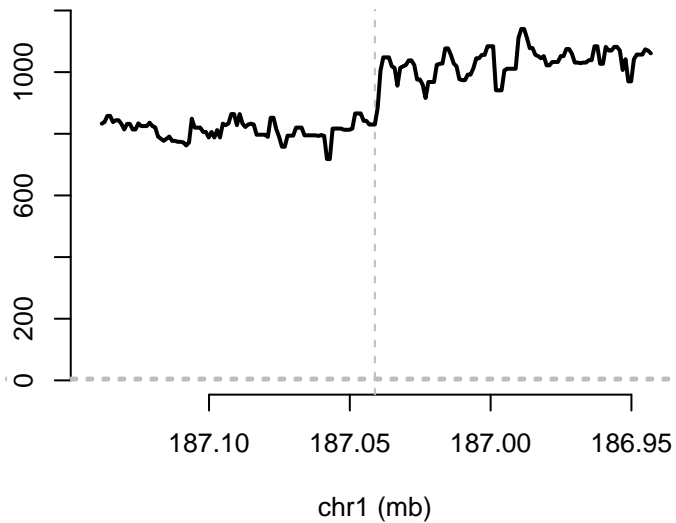

K562 chr1:186,288,080::chr1:187,041,109-+

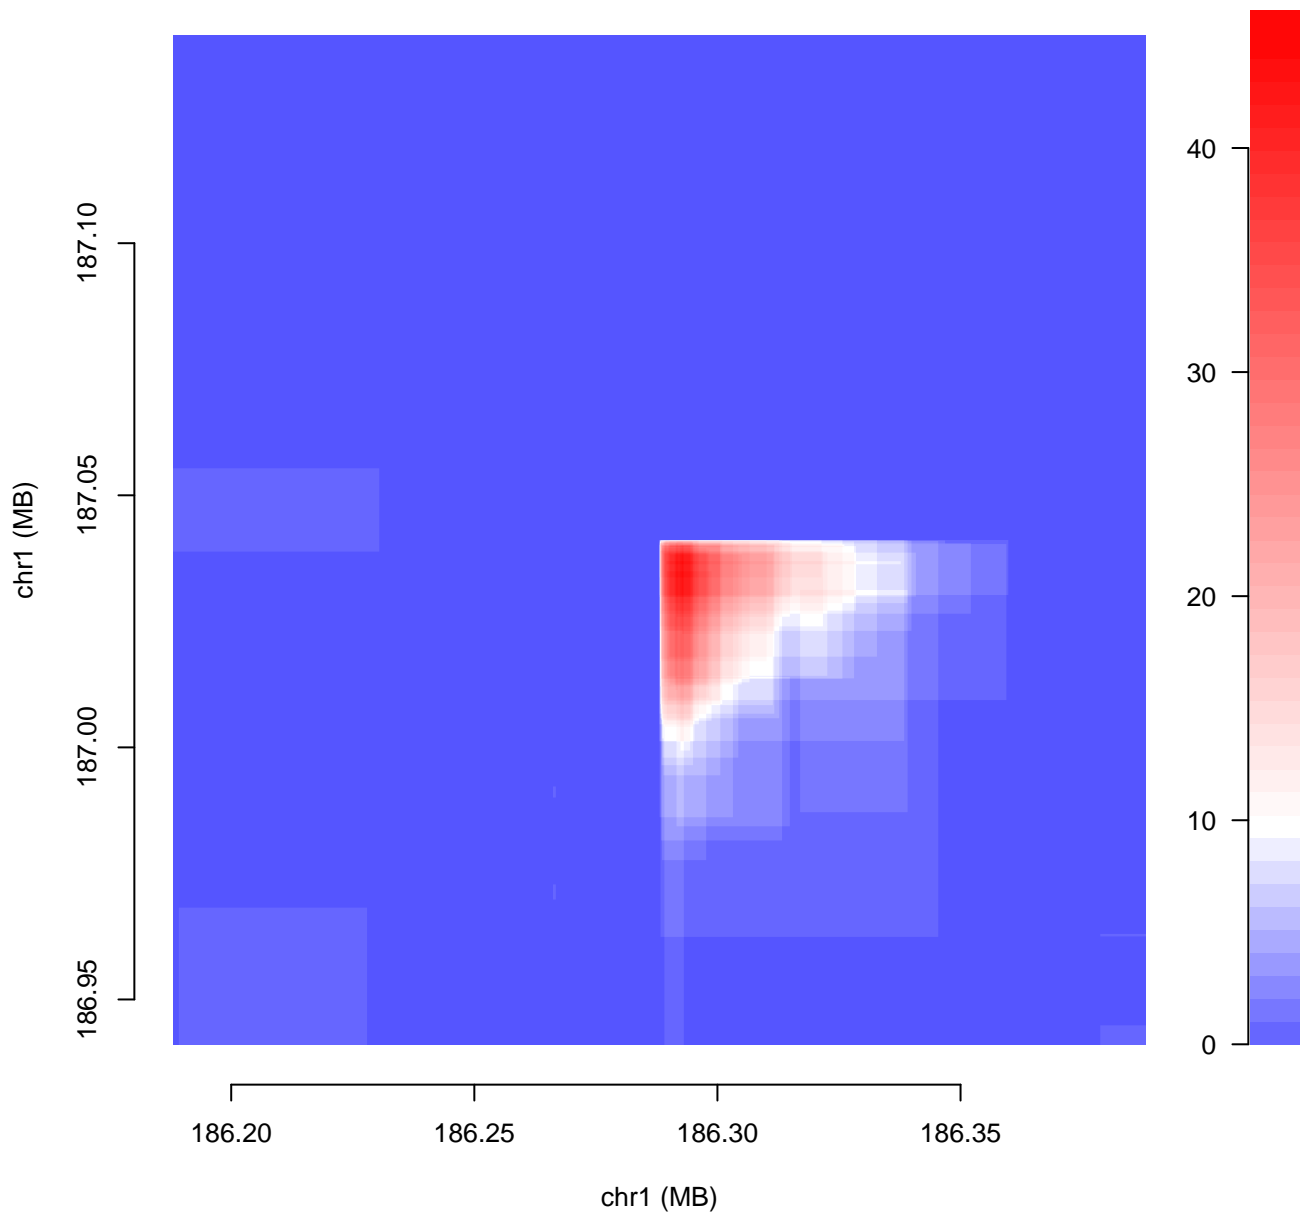

Supplement: Supplemental_Data.zip [file event_158.pdf › event_158.pdf]

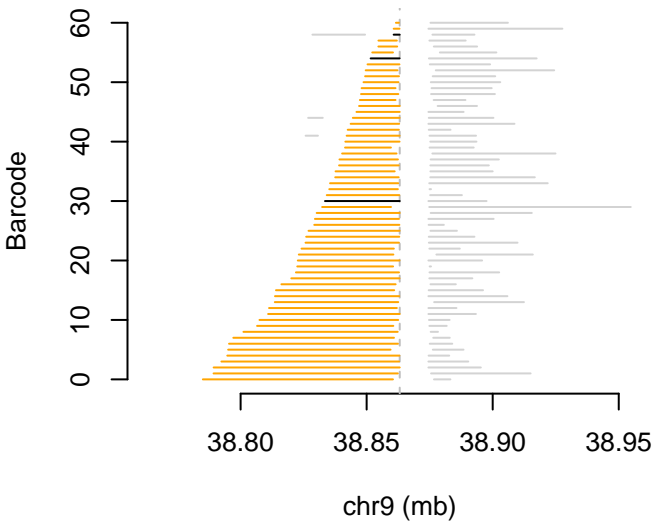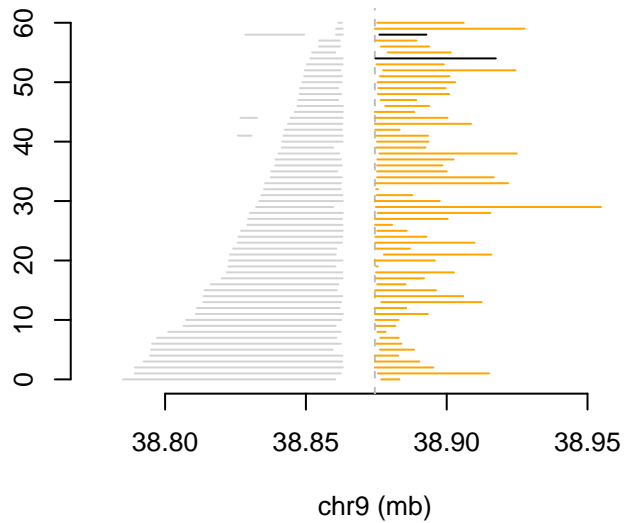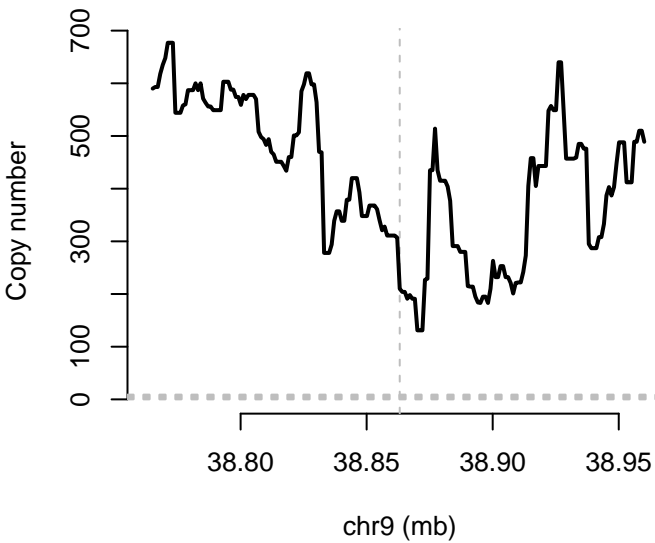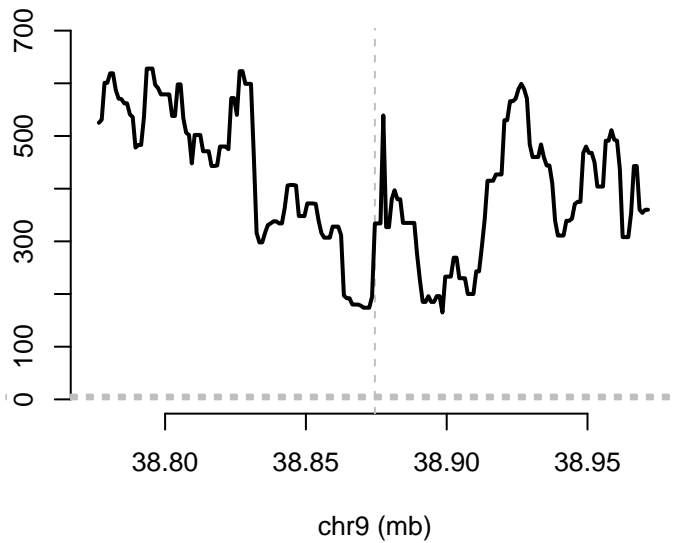

K562 chr9:38,874,493::chr9:38,863,130-+

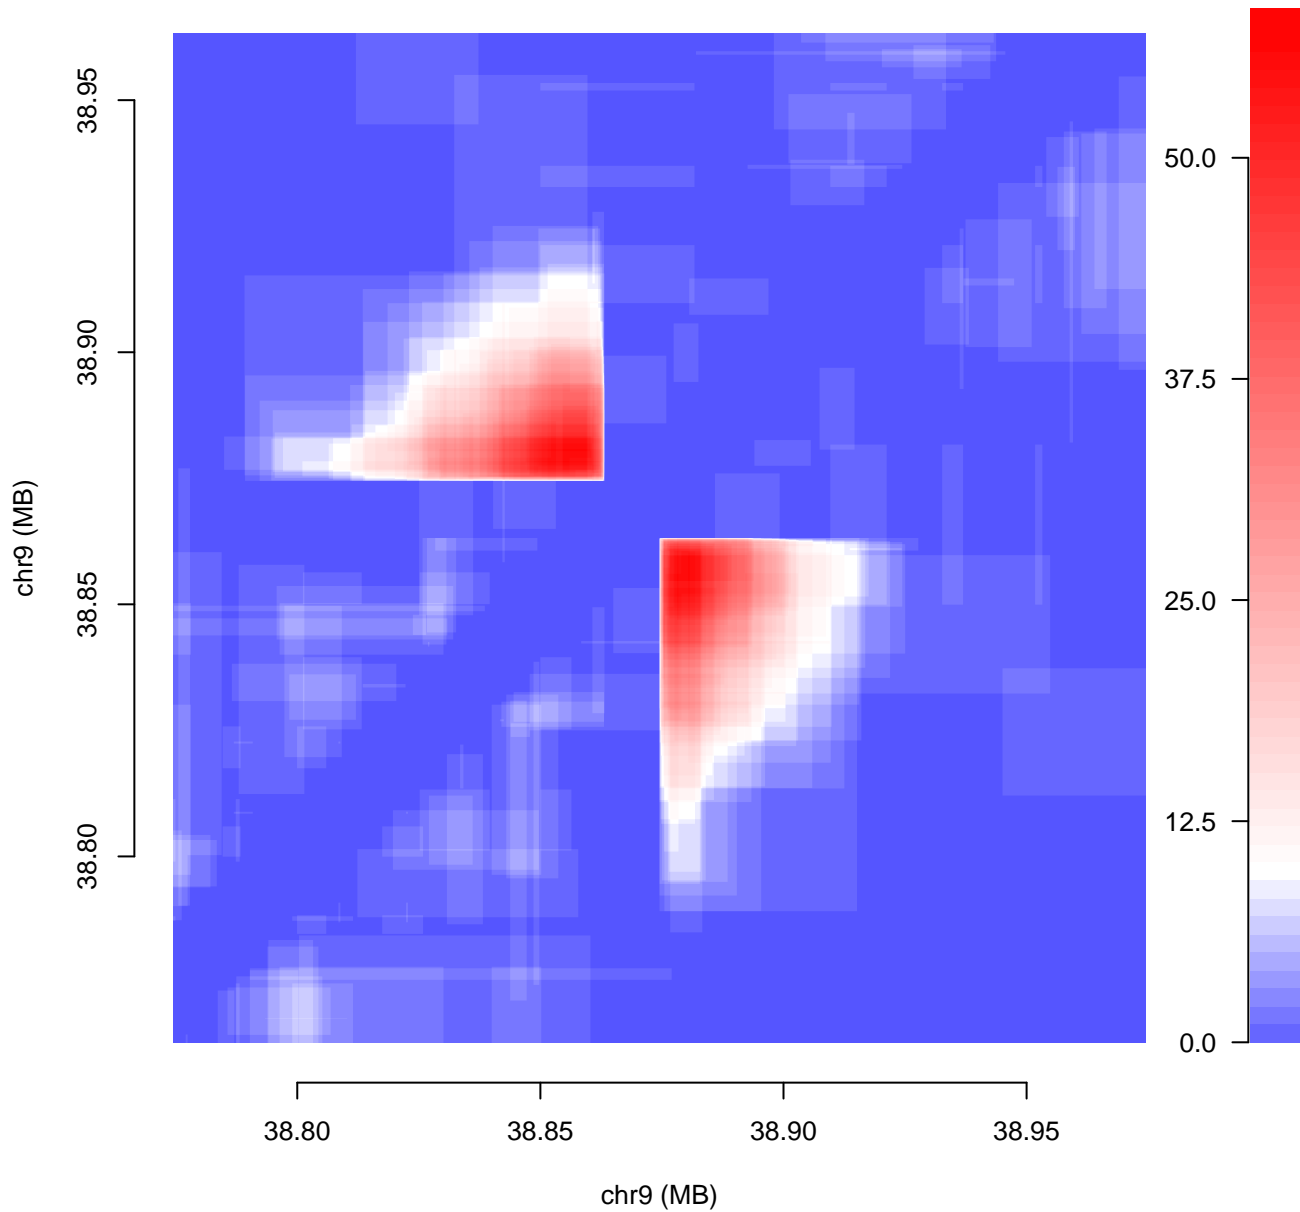

Supplement: Supplemental_Data.zip [file event_159.pdf › event_159.pdf]

Barcode

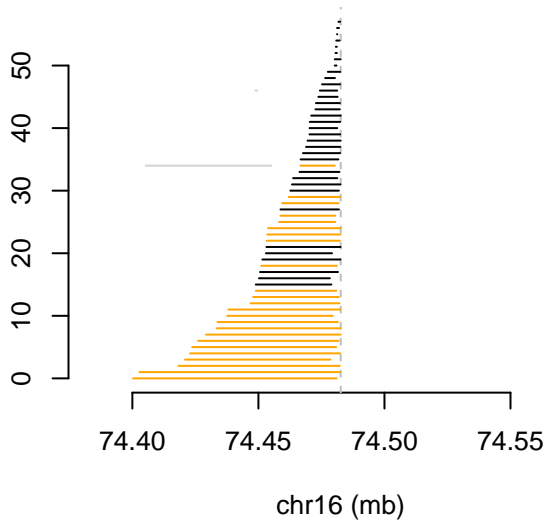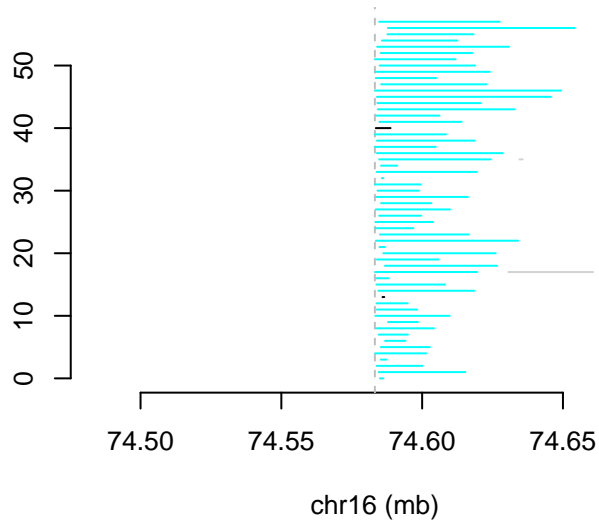

Copy number

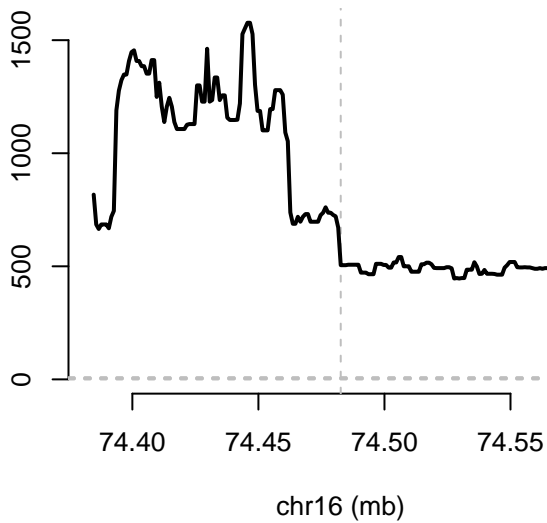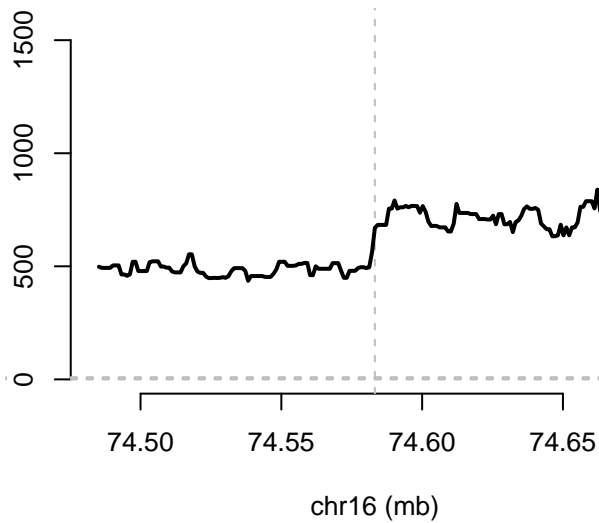

K562 chr16:74,482,660::chr16:74,583,210+-

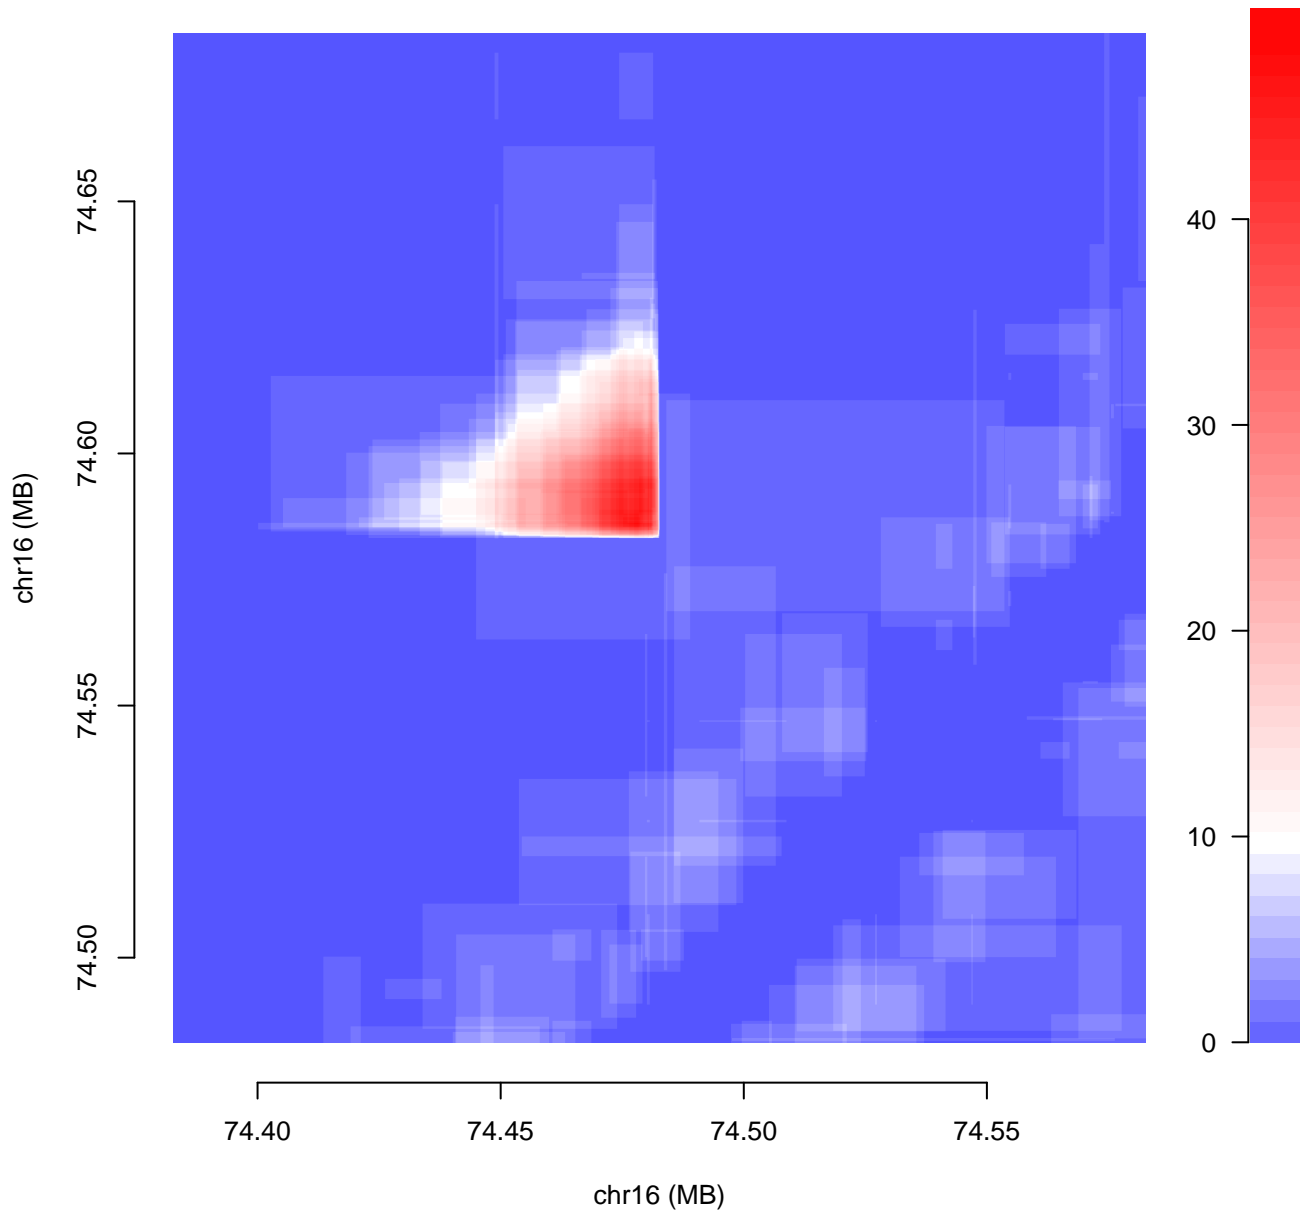

Supplement: Supplemental_Data.zip [file event_16.pdf › event_16.pdf]

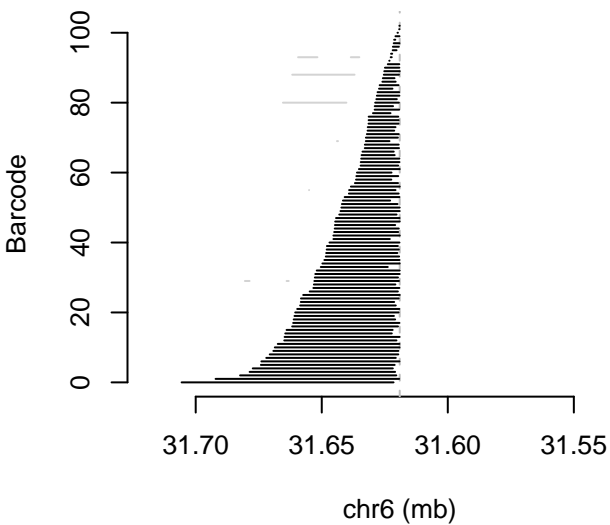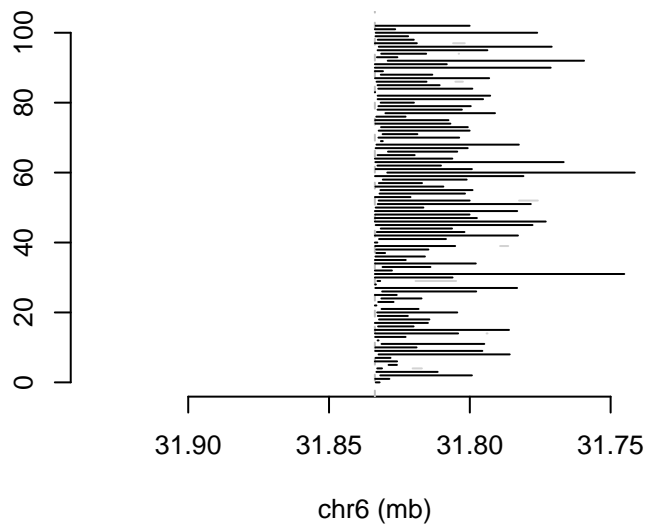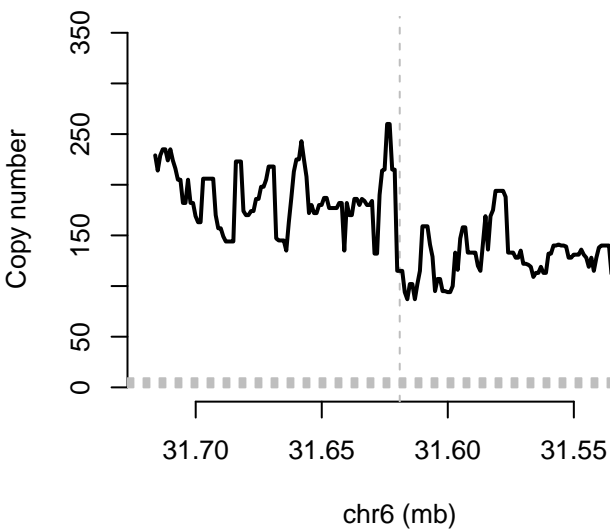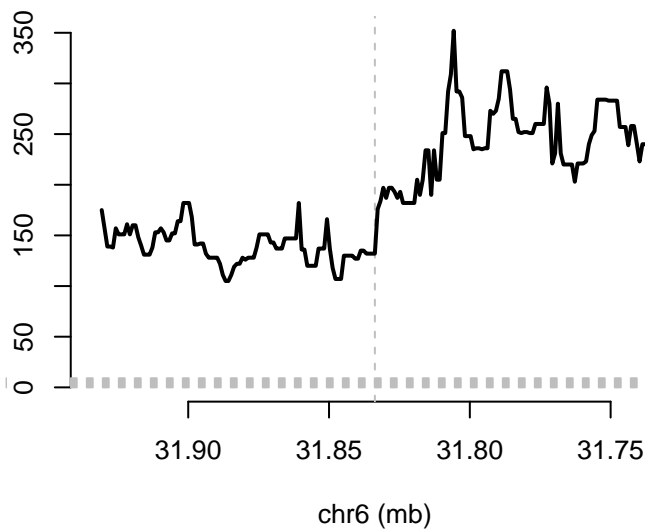

K562 chr6:31,619,062::chr6:31,833,715-+

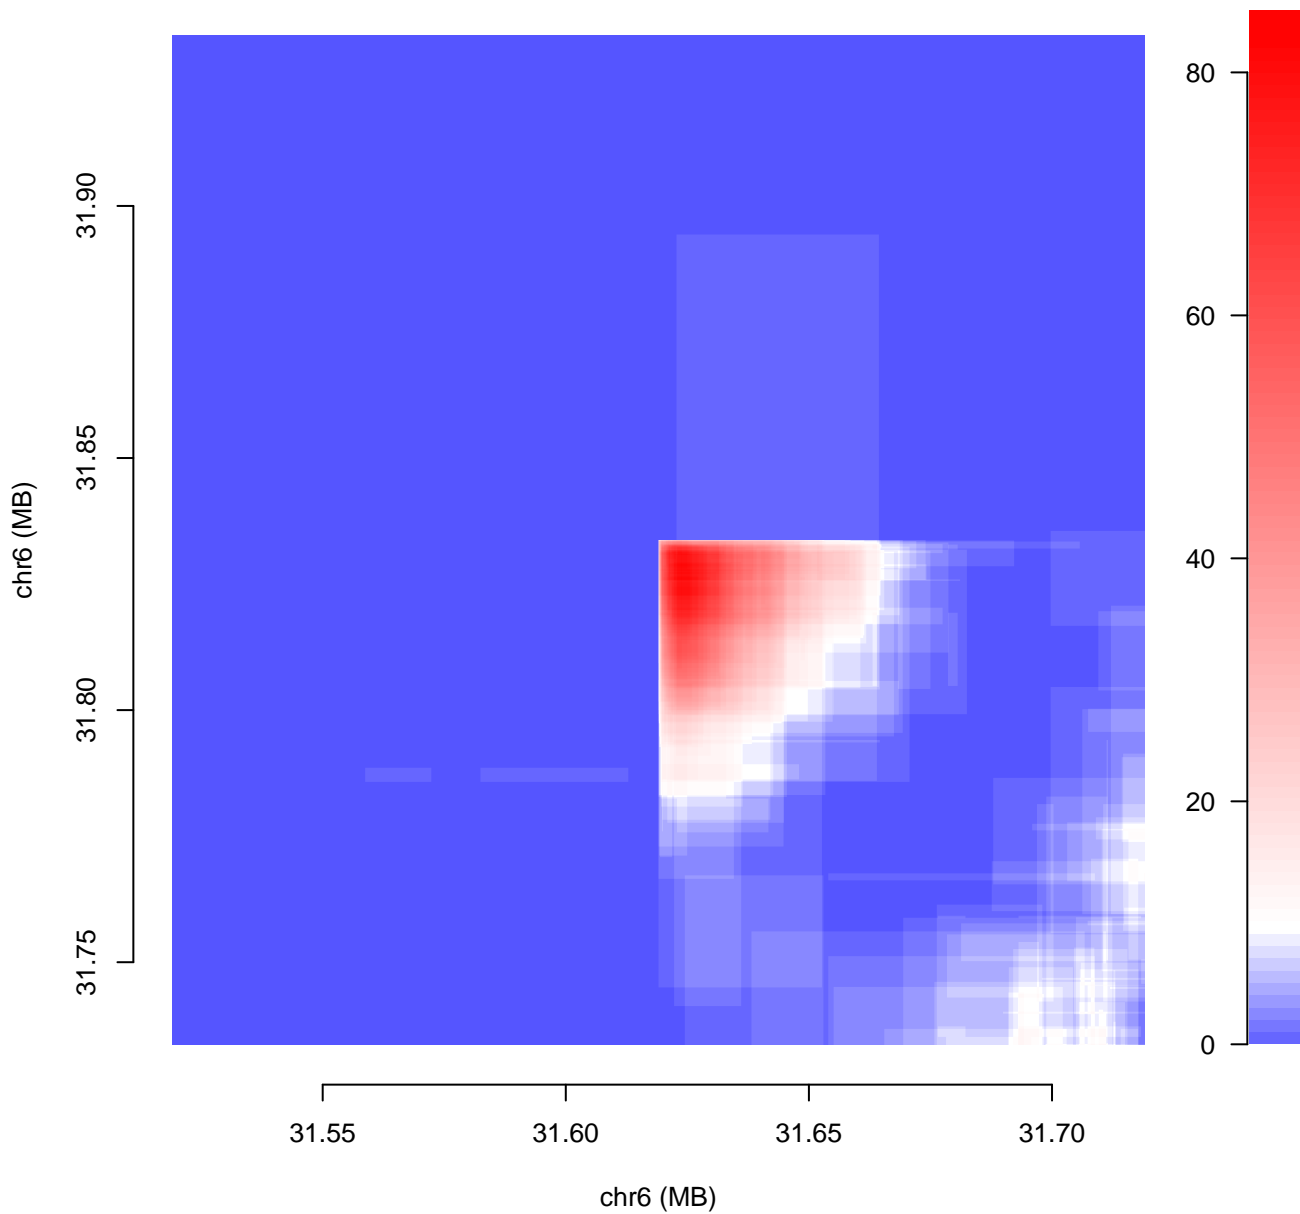

Supplement: Supplemental_Data.zip [file event_160.pdf › event_160.pdf]

Barcode

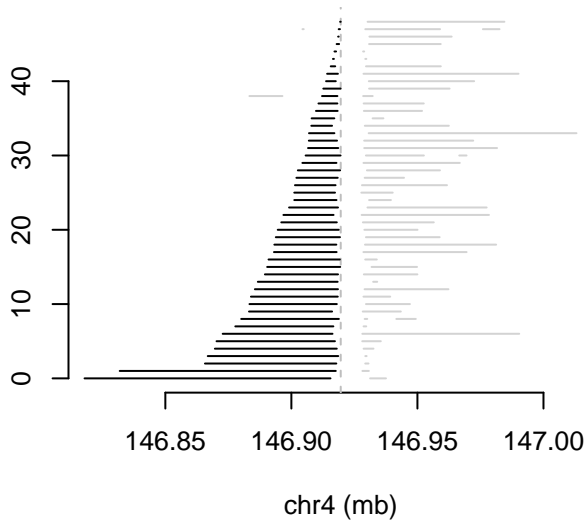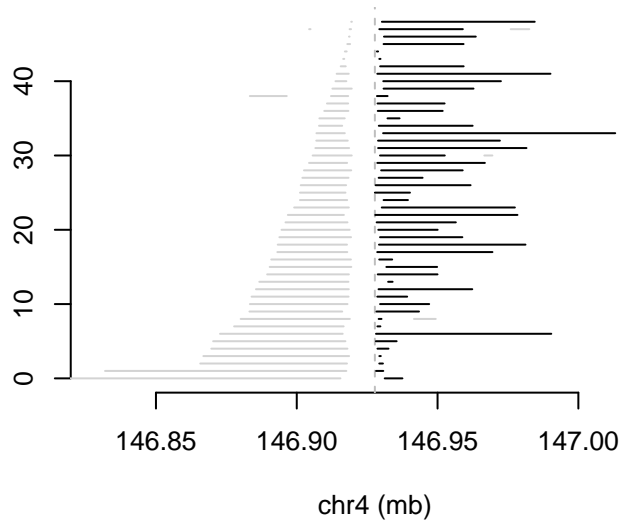

Copy number

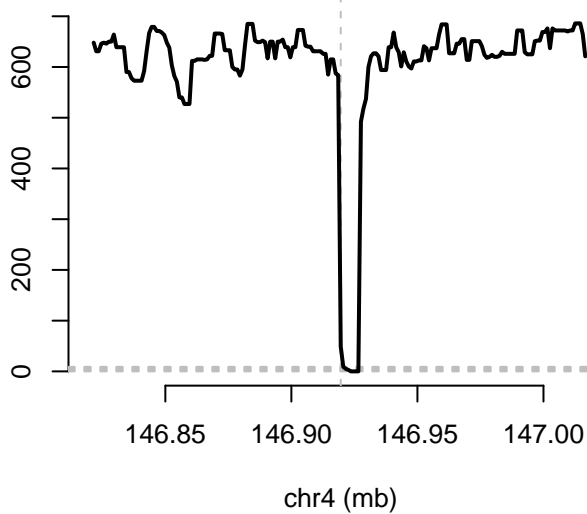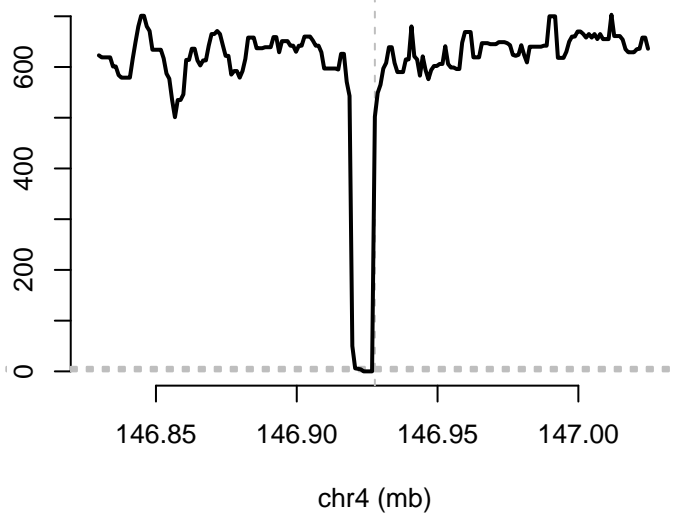

K562 chr4:146,919,581::chr4:146,927,739+-

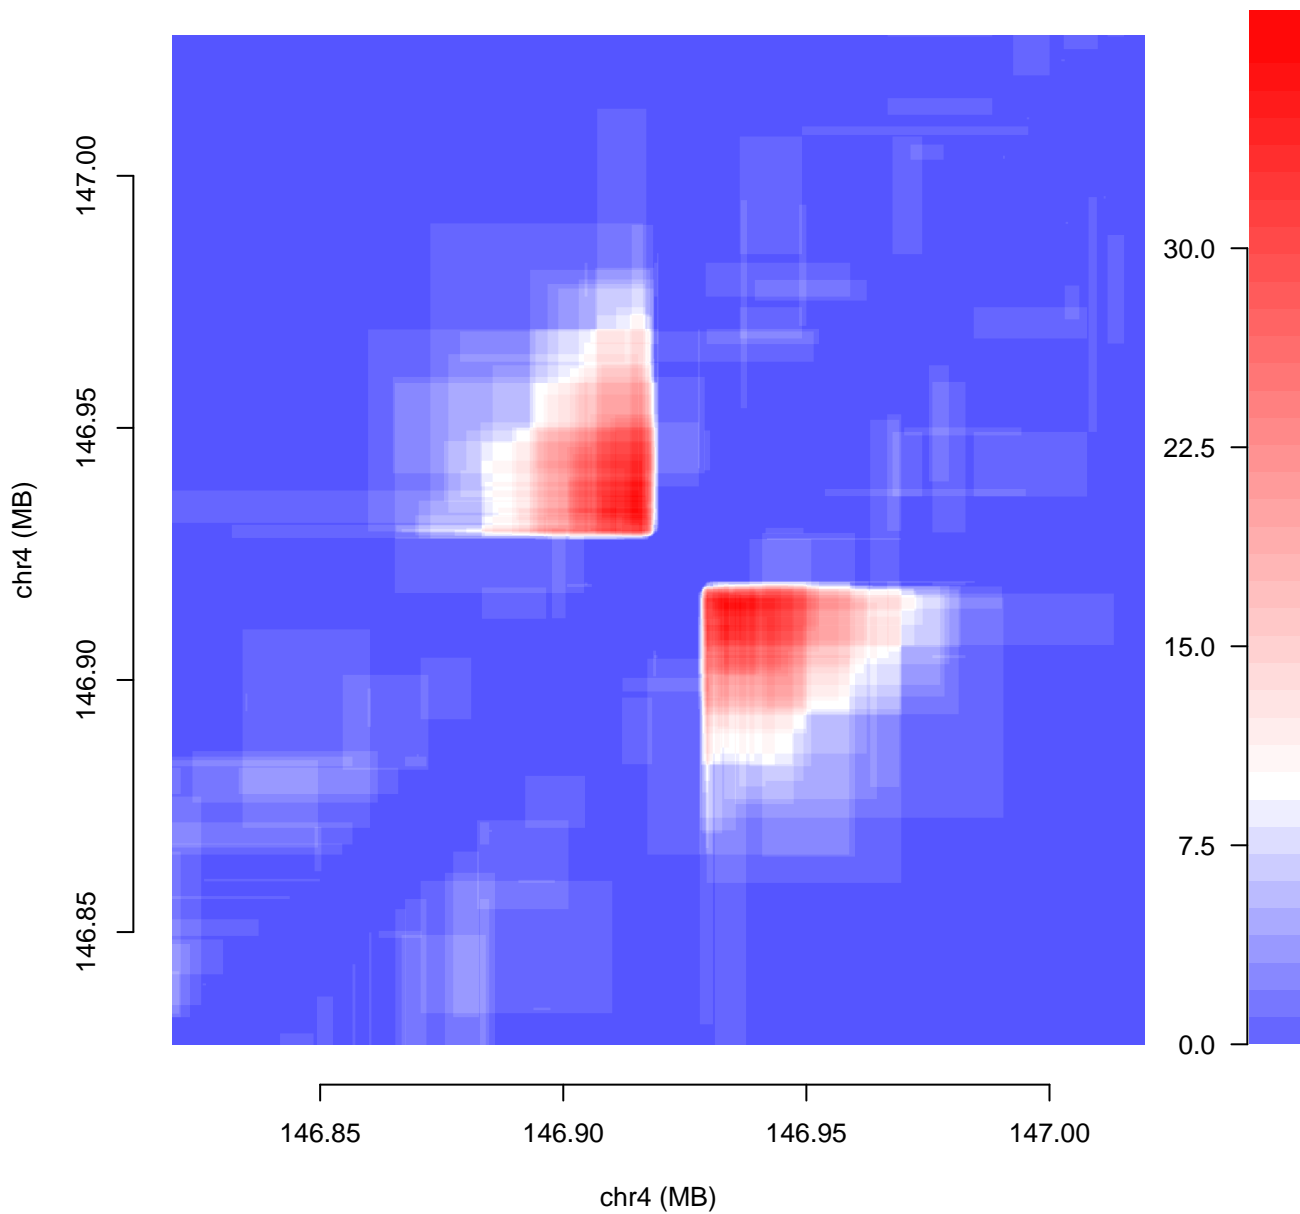

Supplement: Supplemental_Data.zip [file event_161.pdf › event_161.pdf]

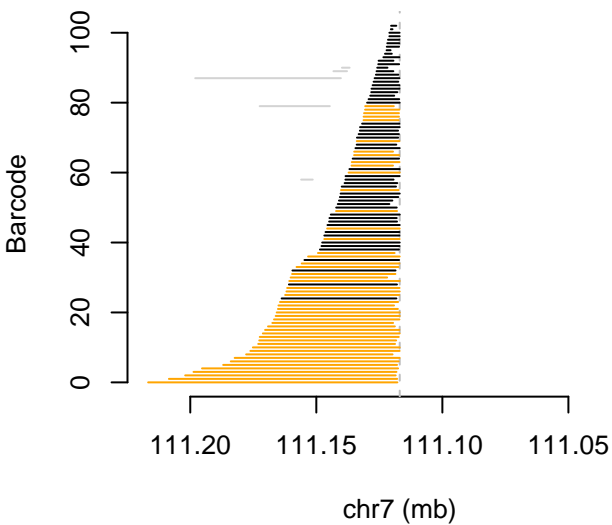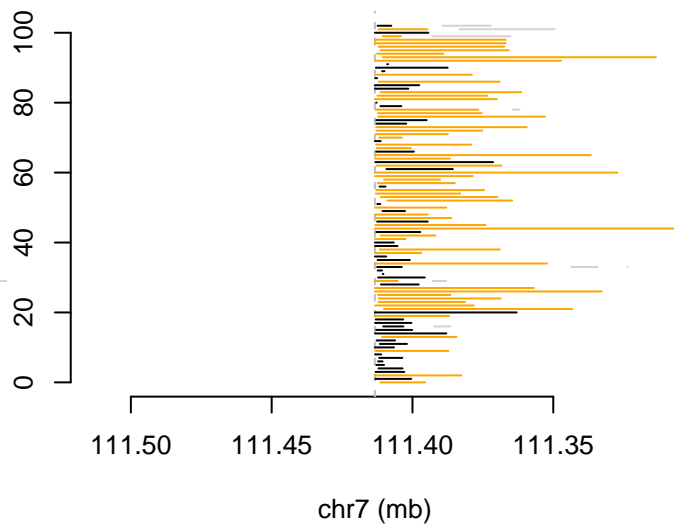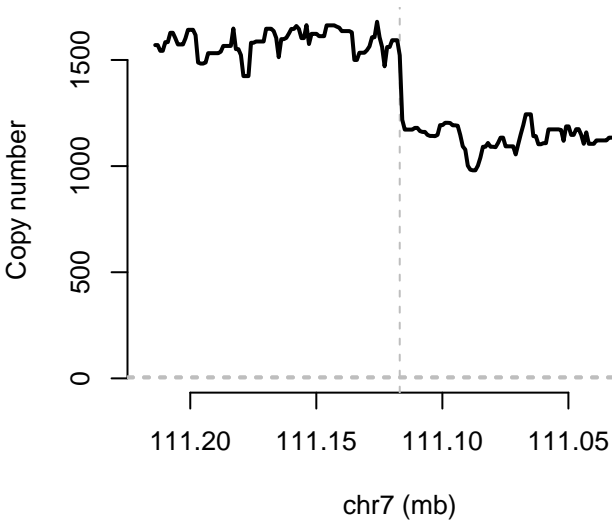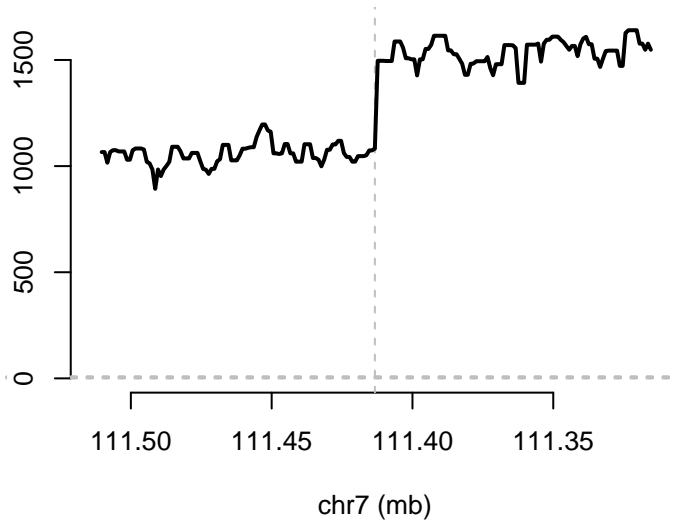

K562 chr7:111,413,350::chr7:111,116,906+-

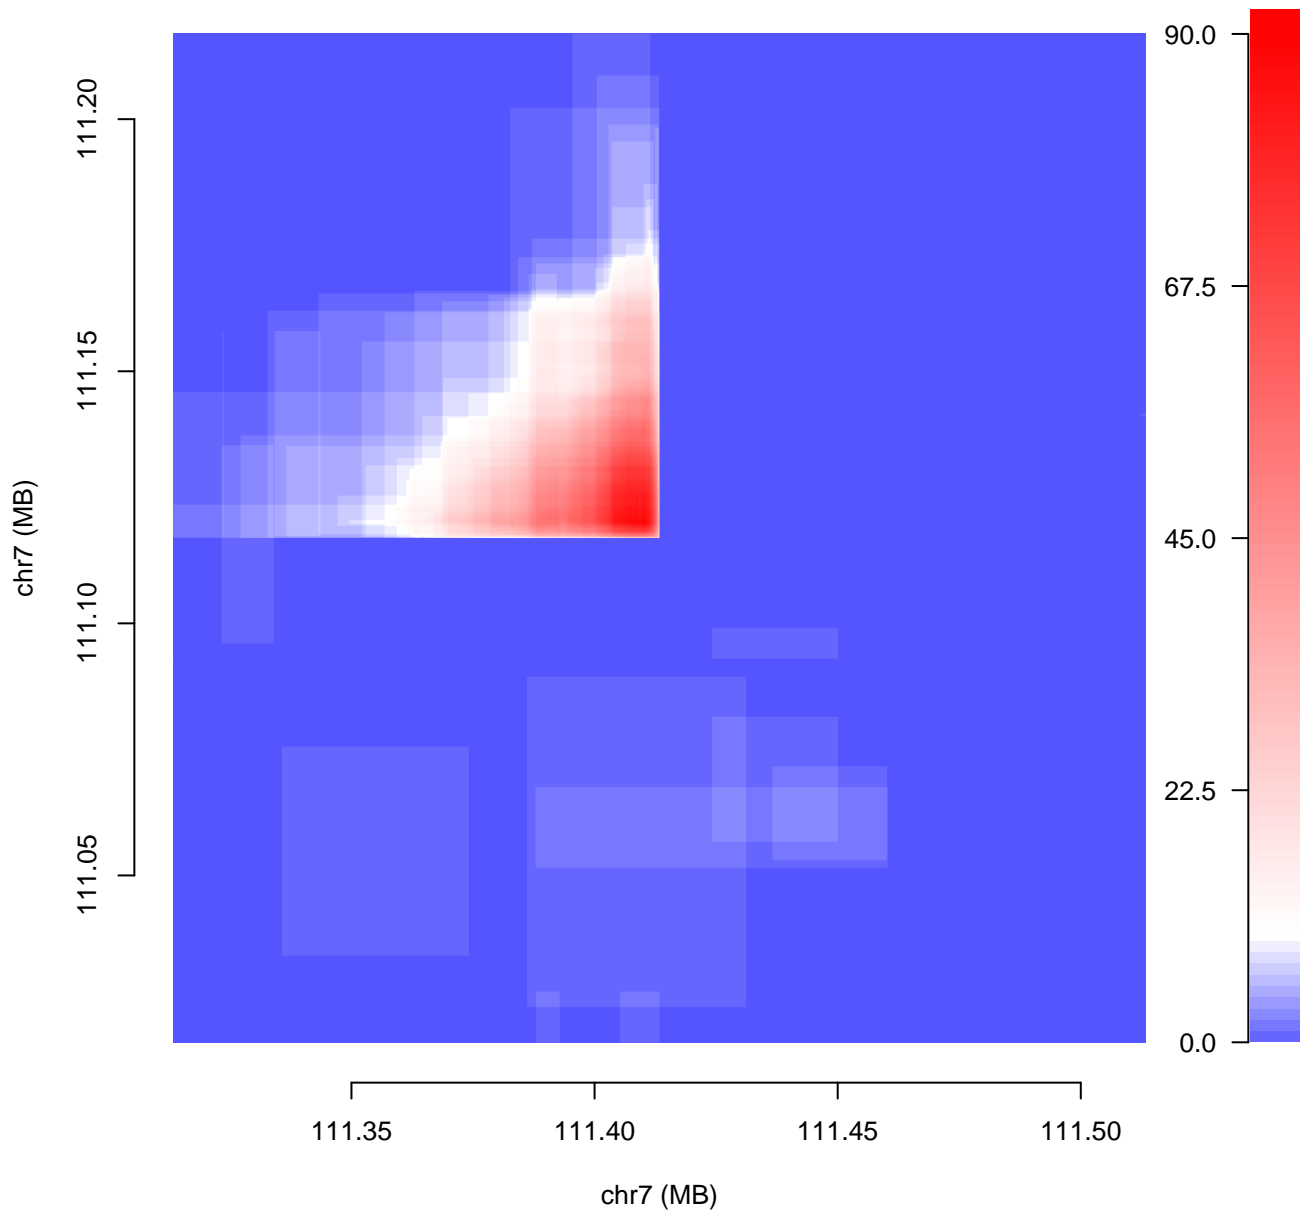

Supplement: Supplemental_Data.zip [file event_162.pdf › event_162.pdf]

Barcode

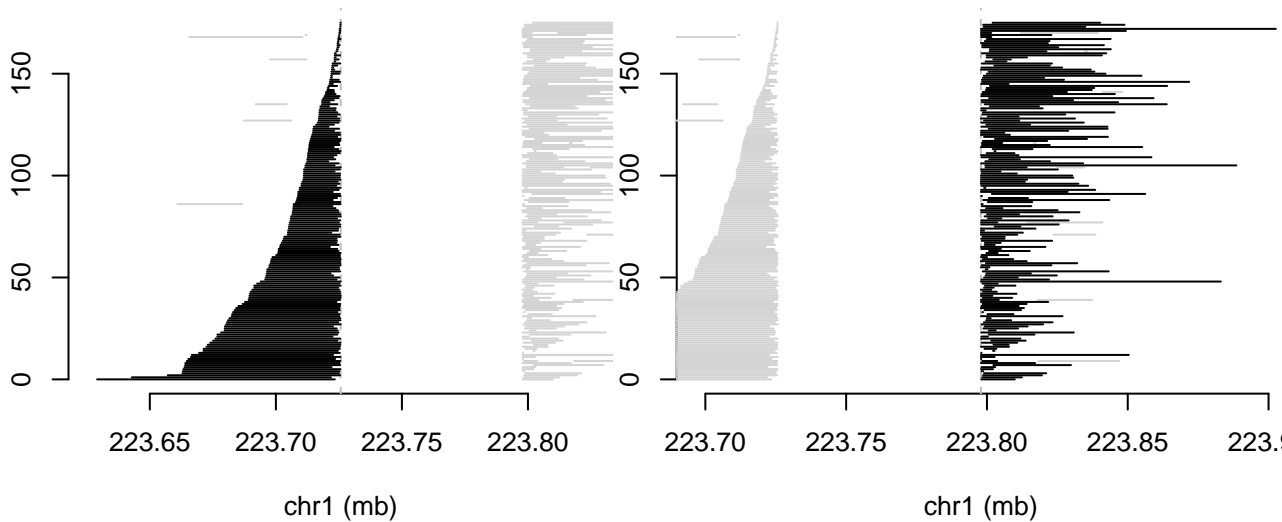

Copy number

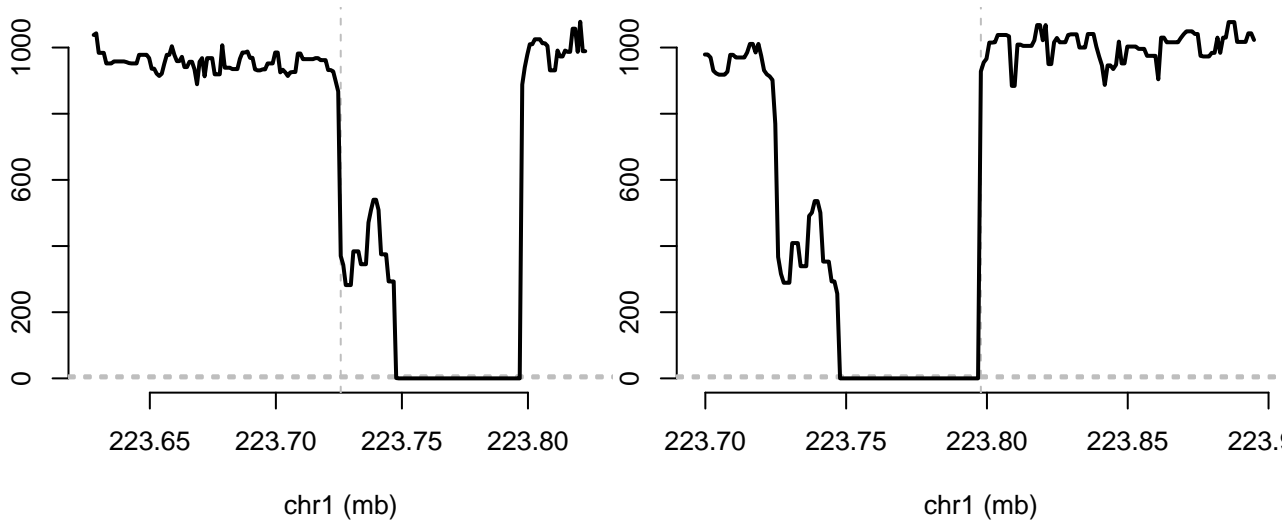

K562 chr1:223,797,844::chr1:223,725,735-+

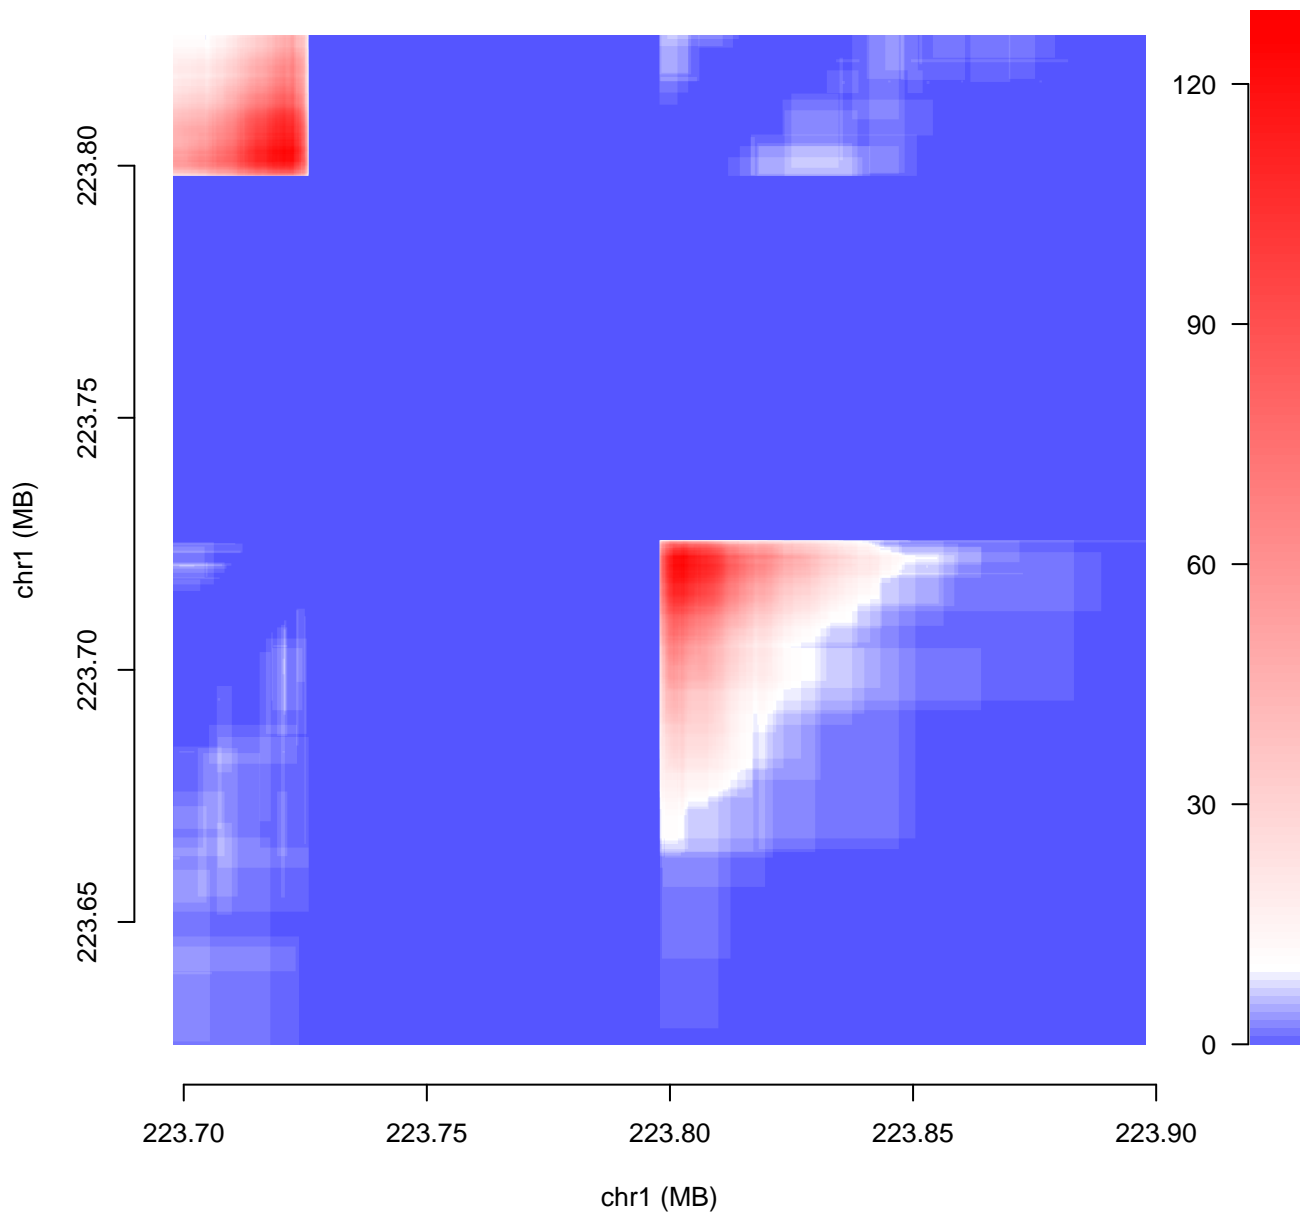

Supplement: Supplemental_Data.zip [file event_163.pdf › event_163.pdf]

Barcode

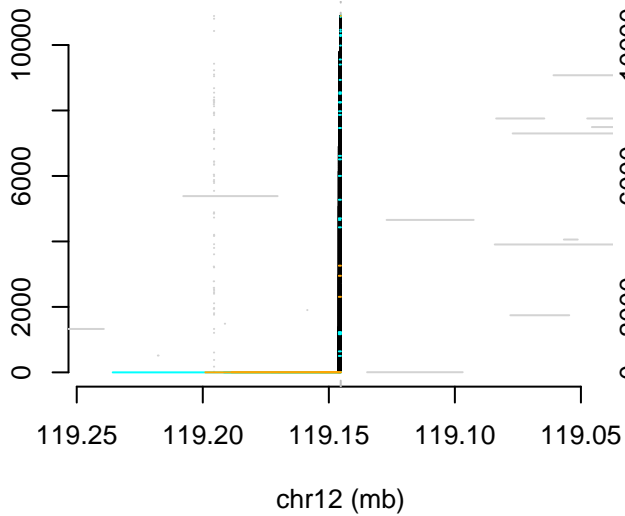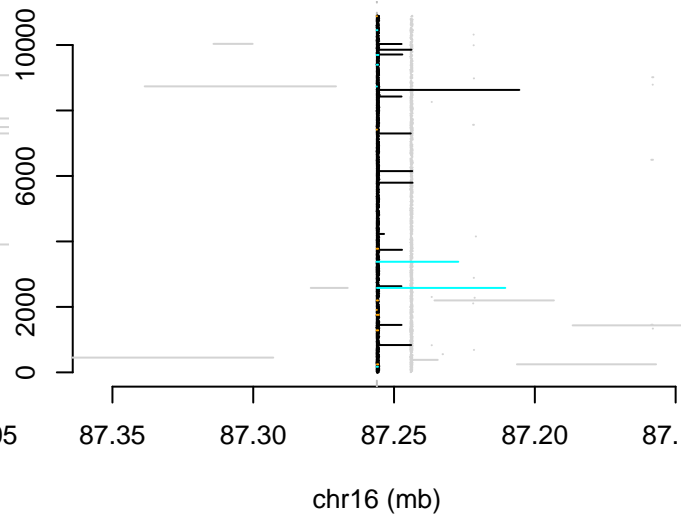

Copy number

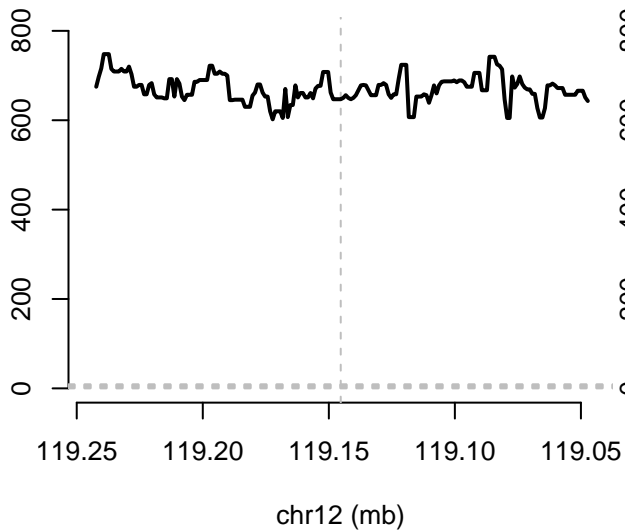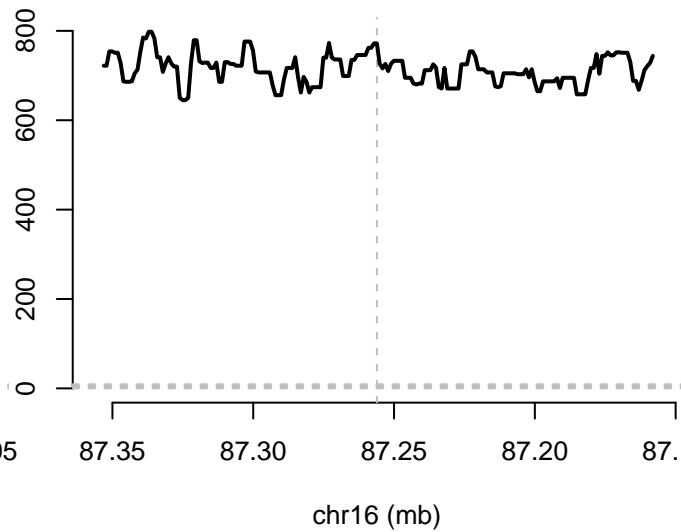

K562 chr16:87,256,097::chr12:119,145,274+-

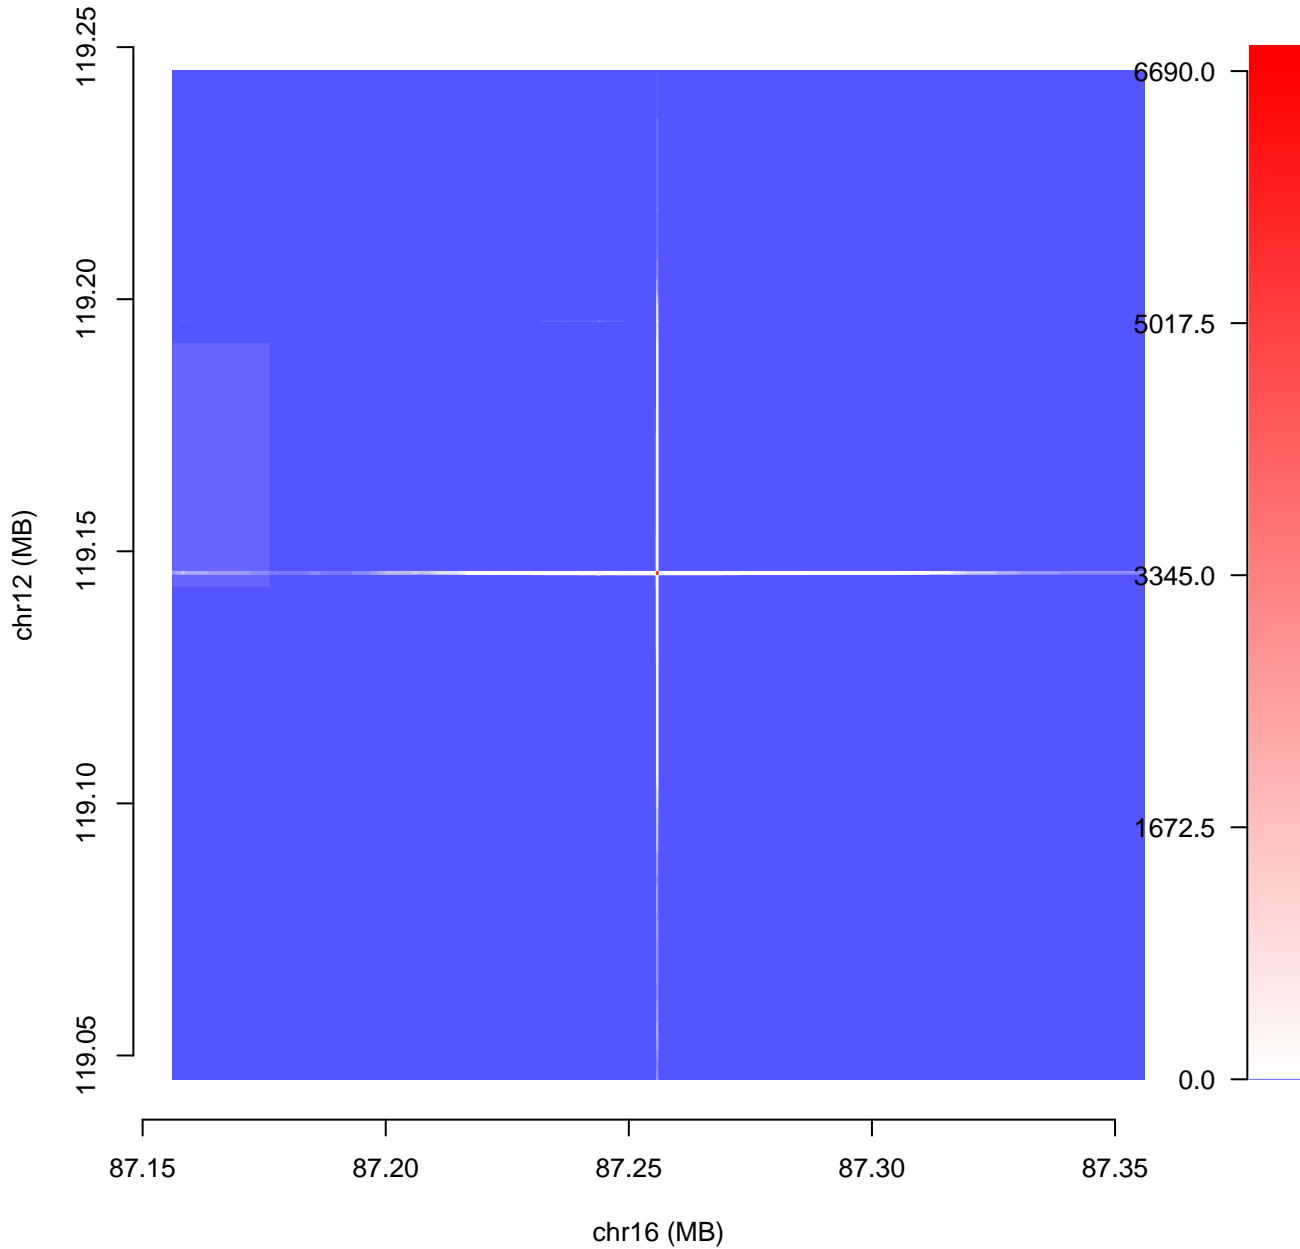

Supplement: Supplemental_Data.zip [file event_164.pdf › event_164.pdf]

Barcode

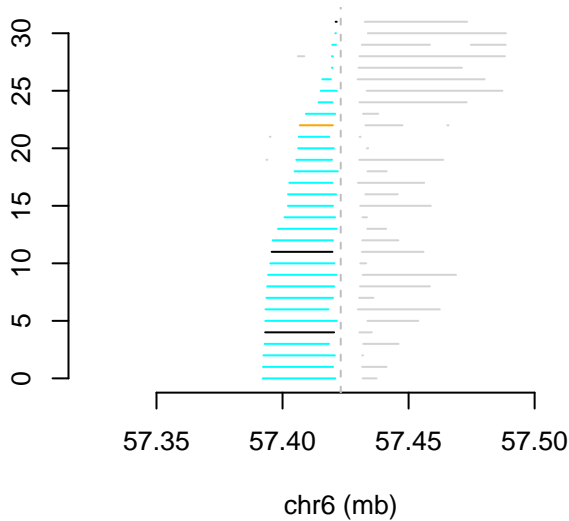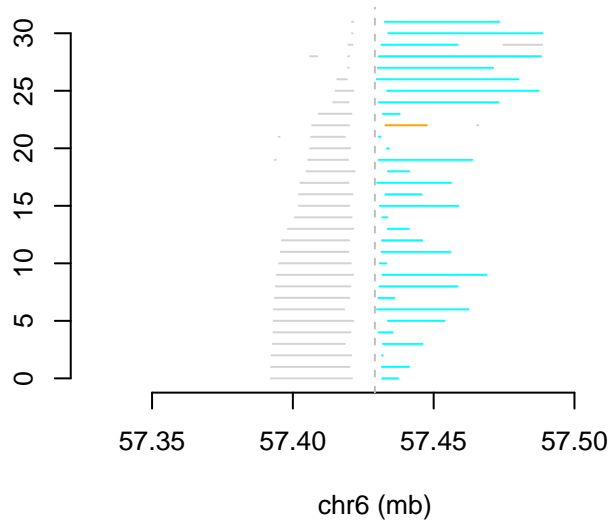

Copy number

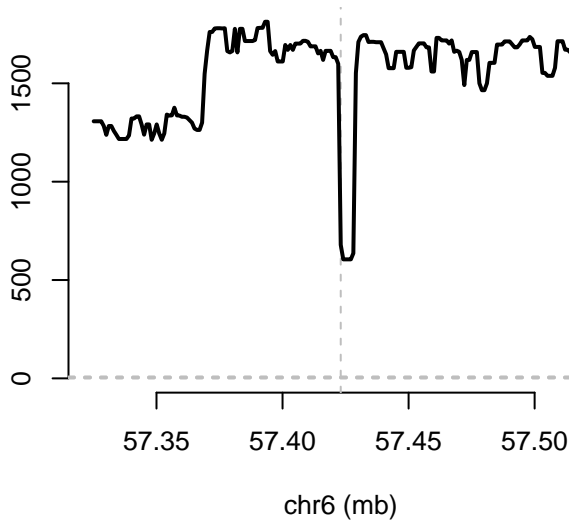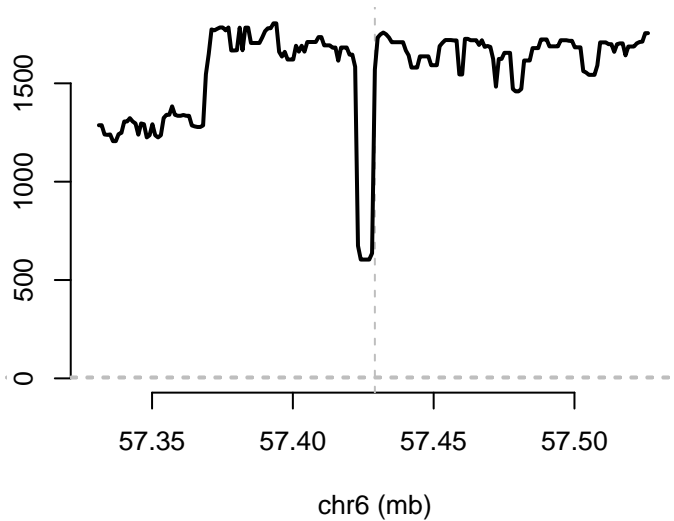

K562 chr6:57,423,086::chr6:57,429,120+-

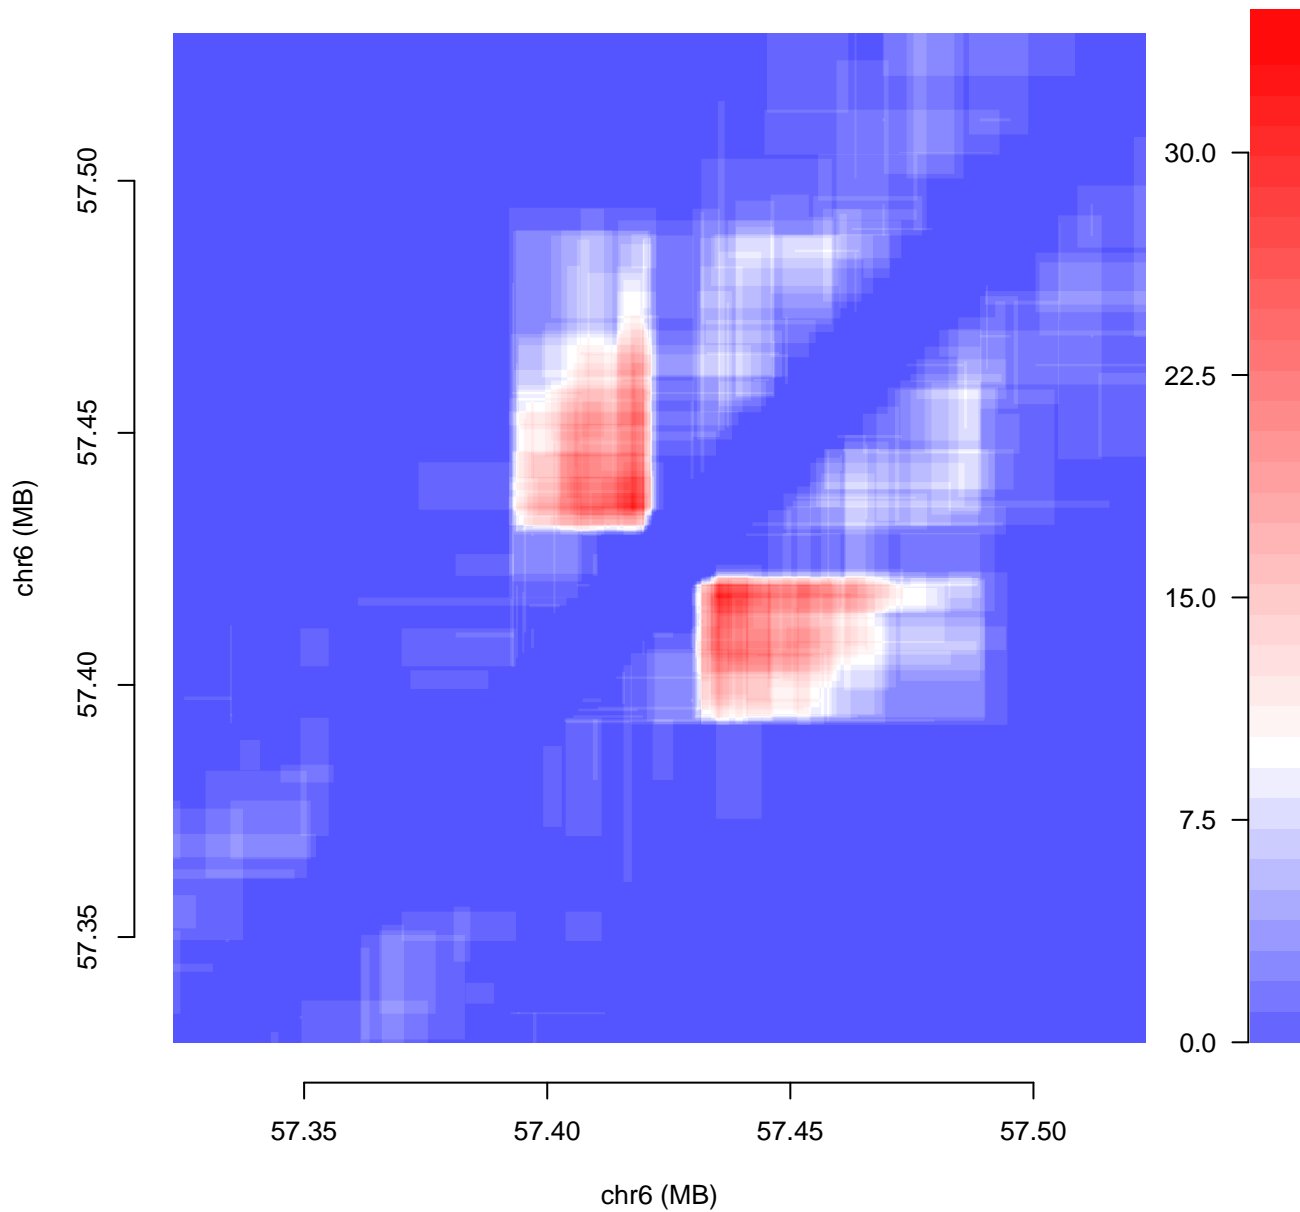

Supplement: Supplemental_Data.zip [file event_165.pdf › event_165.pdf]

Barcode

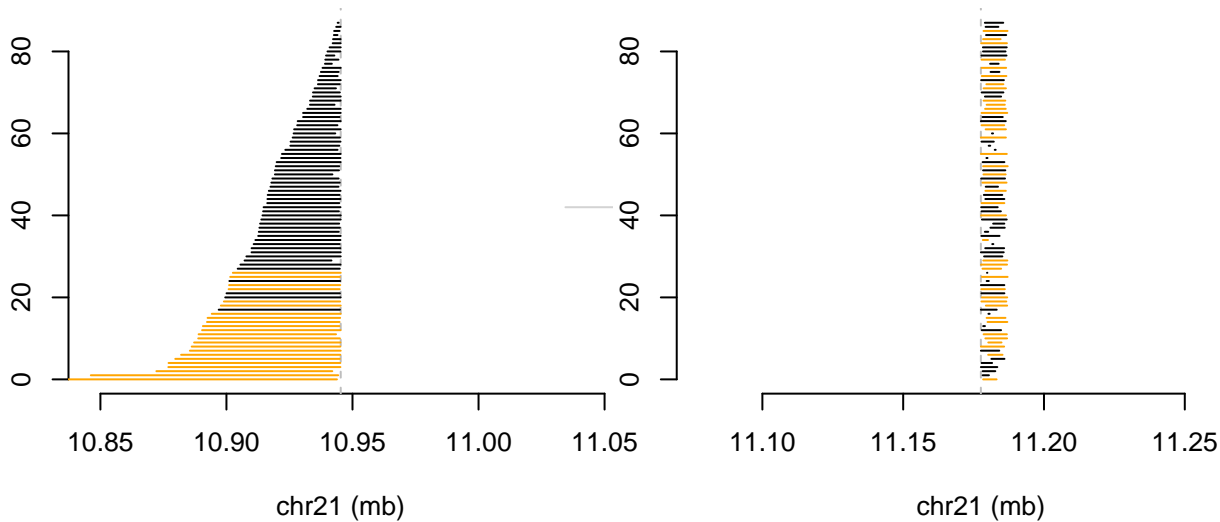

Copy number

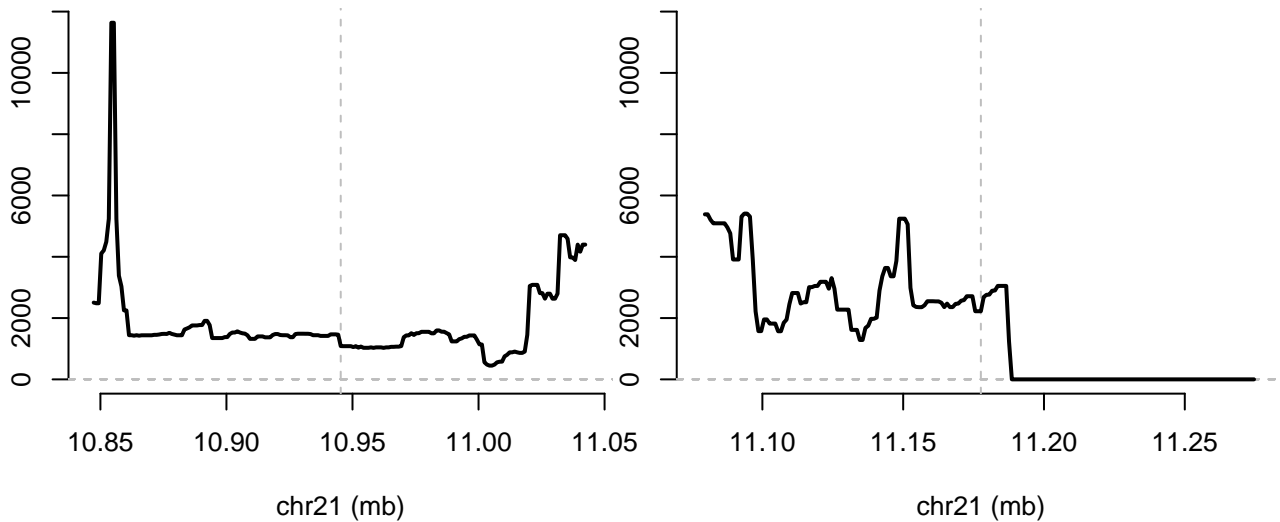

K562 chr21:11,177,587::chr21:10,945,339-+

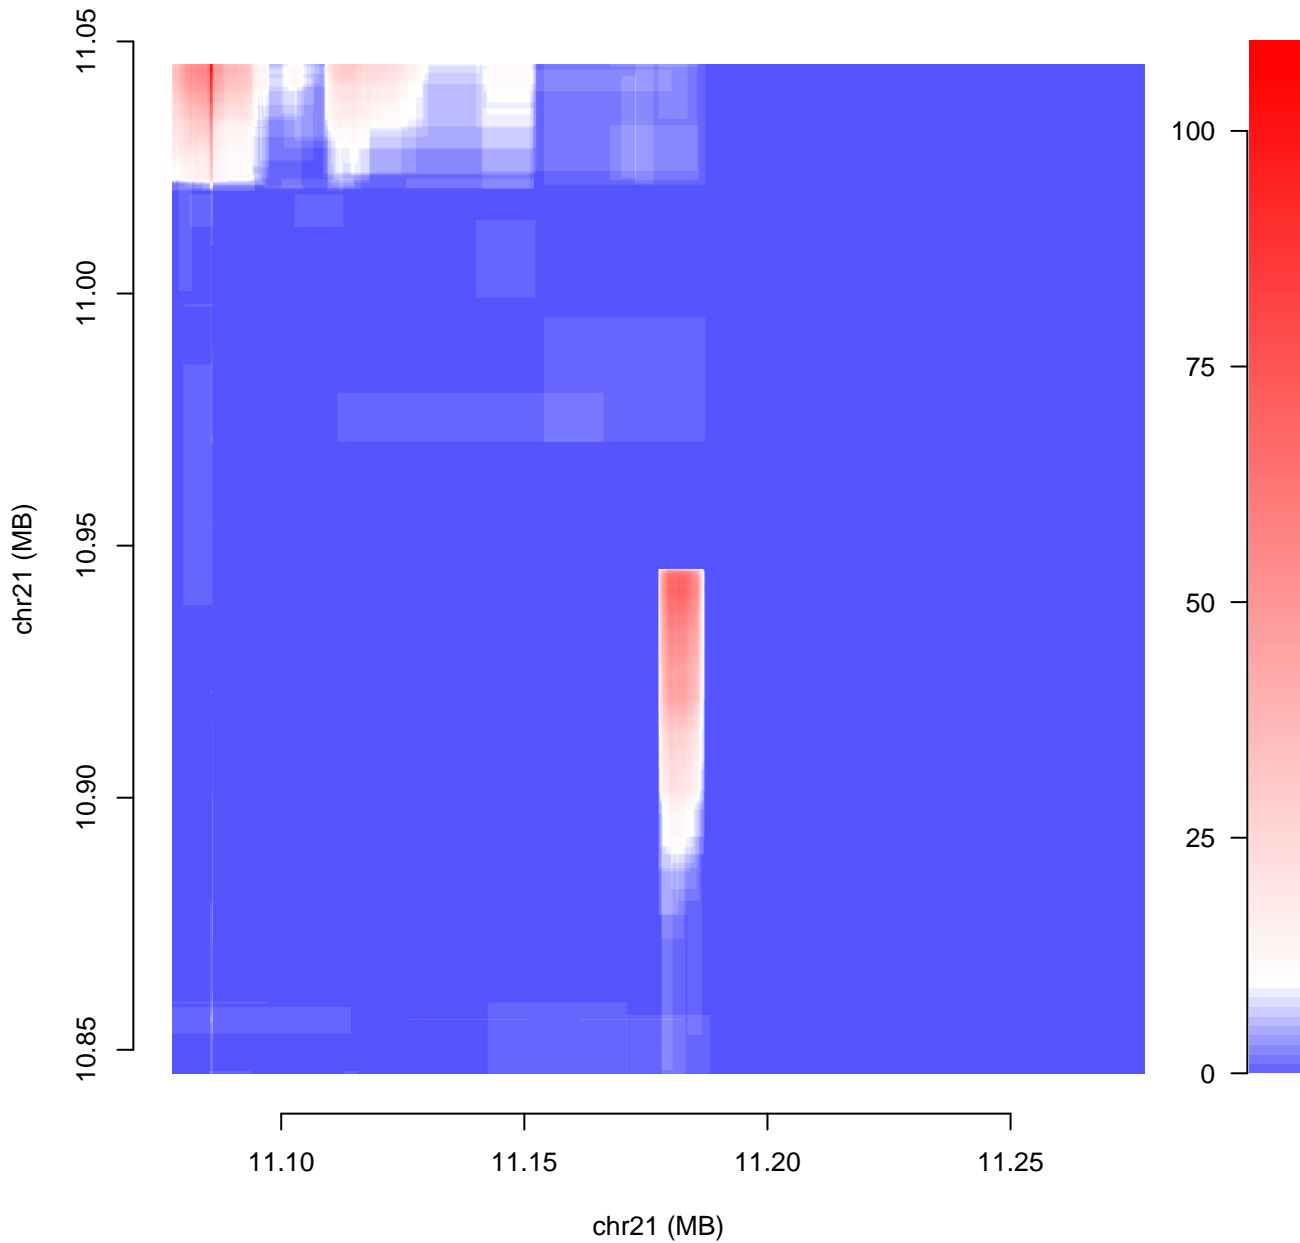

Supplement: Supplemental_Data.zip [file event_166.pdf › event_166.pdf]

Barcode

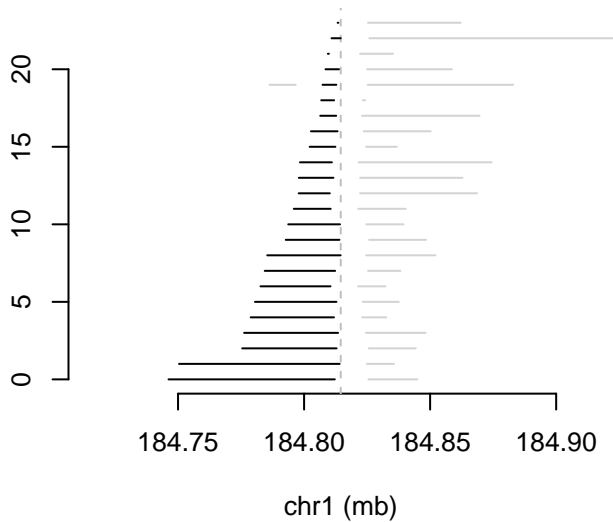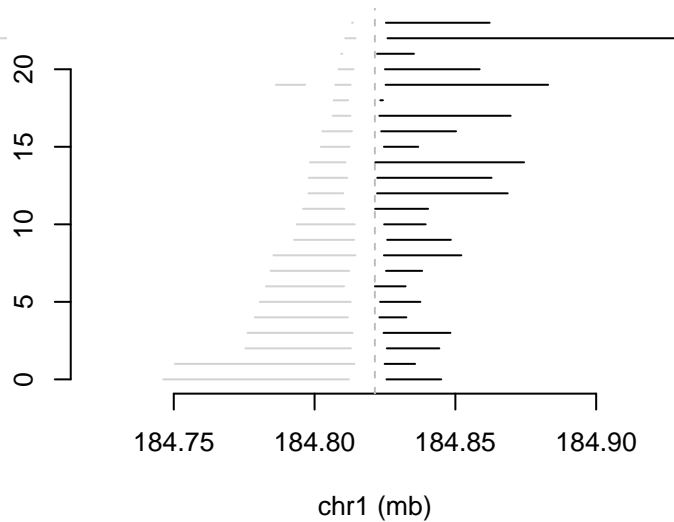

Copy number

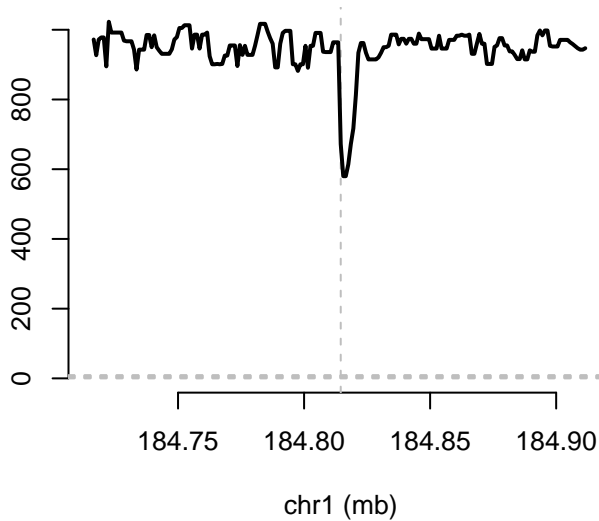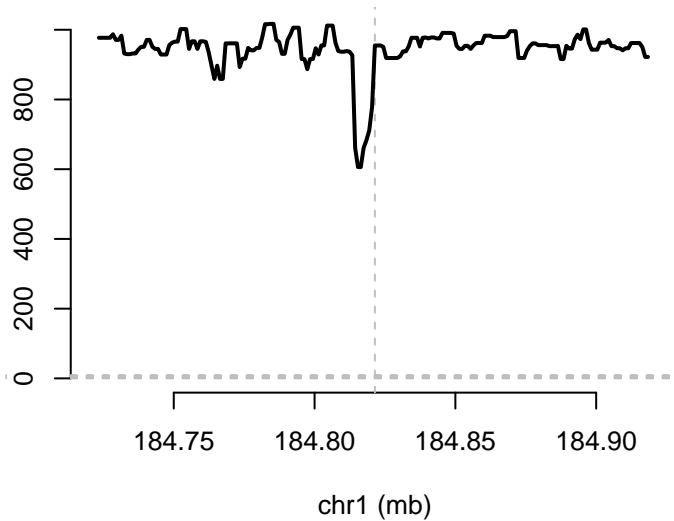

K562 chr1:184,821,414::chr1:184,814,543-+

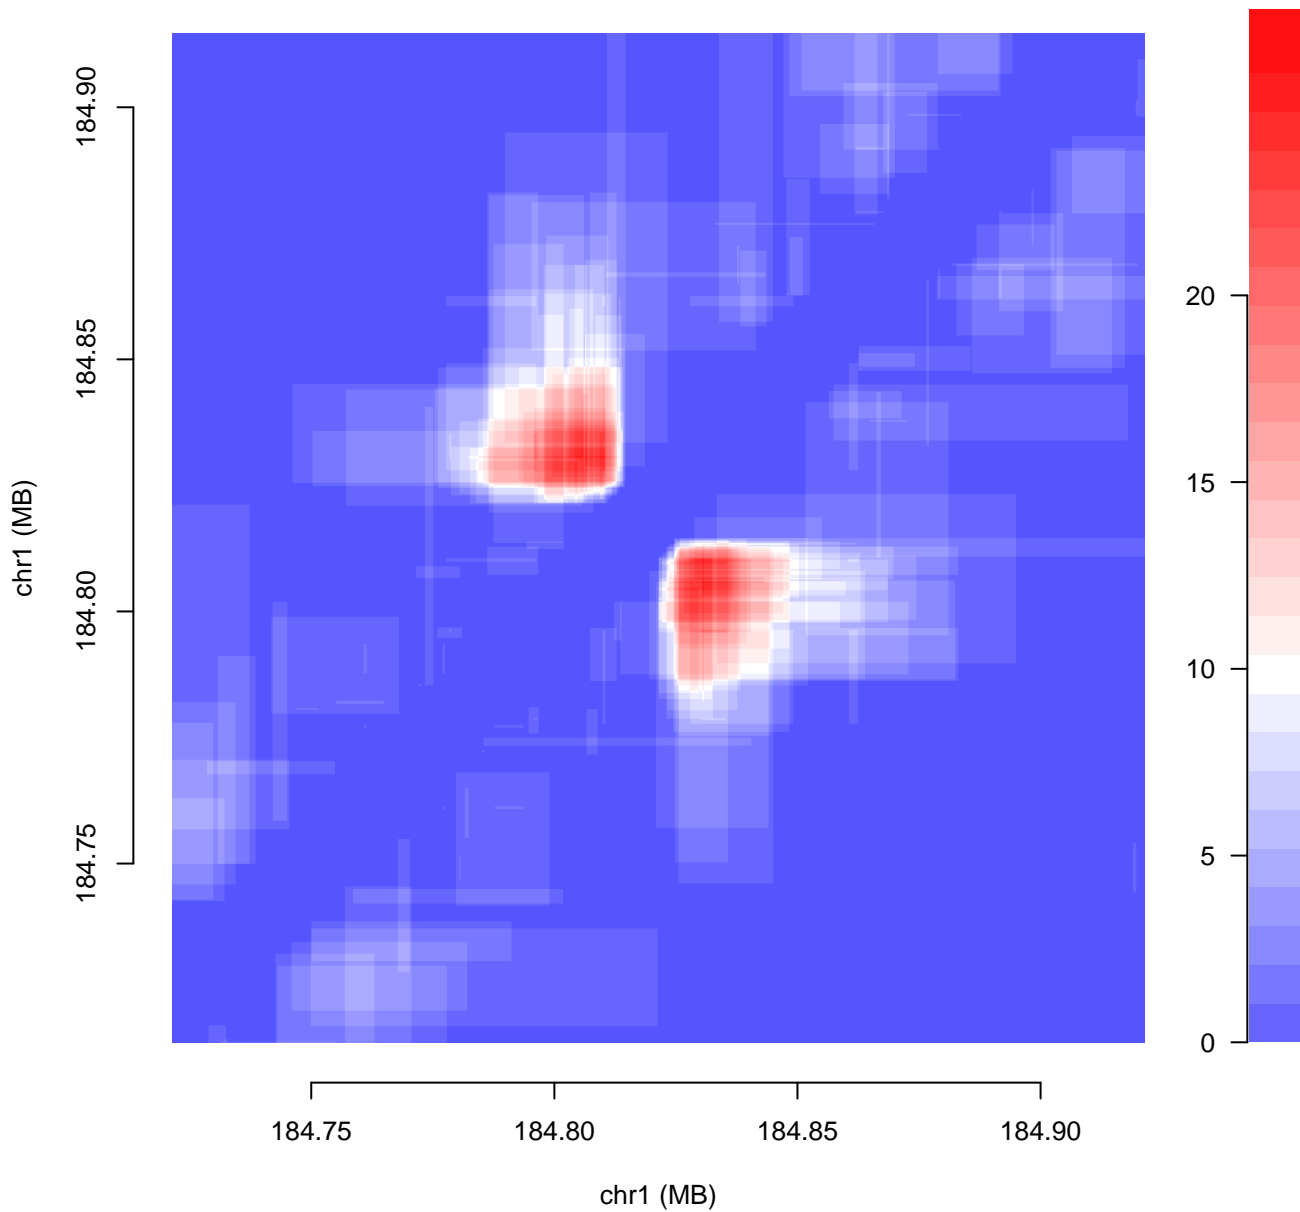

Supplement: Supplemental_Data.zip [file event_168.pdf › event_168.pdf]

Barcode

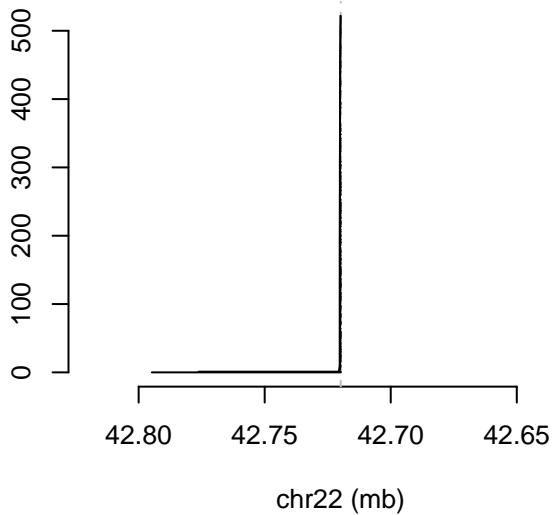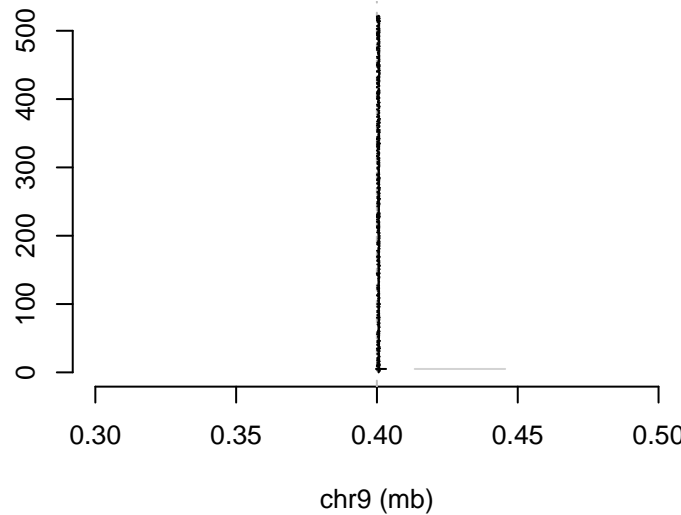

Copy number

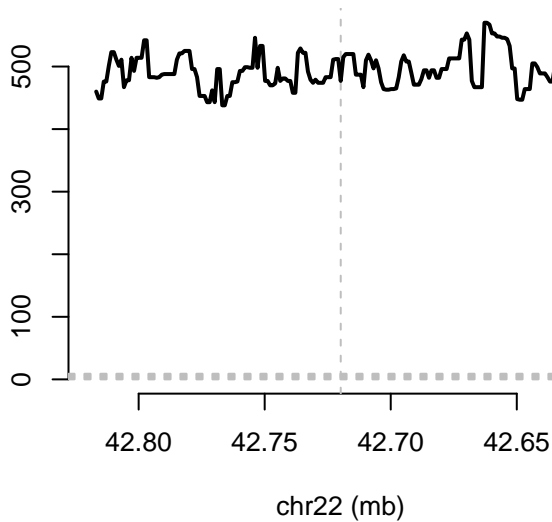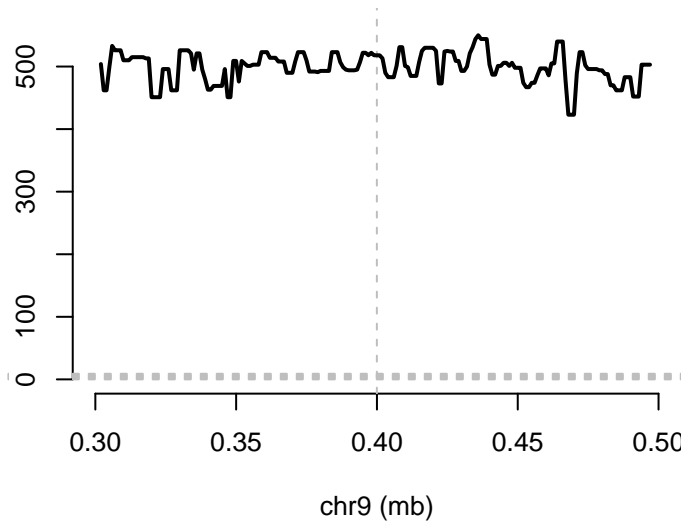

K562 chr22:42,719,830::chr9:399,971--

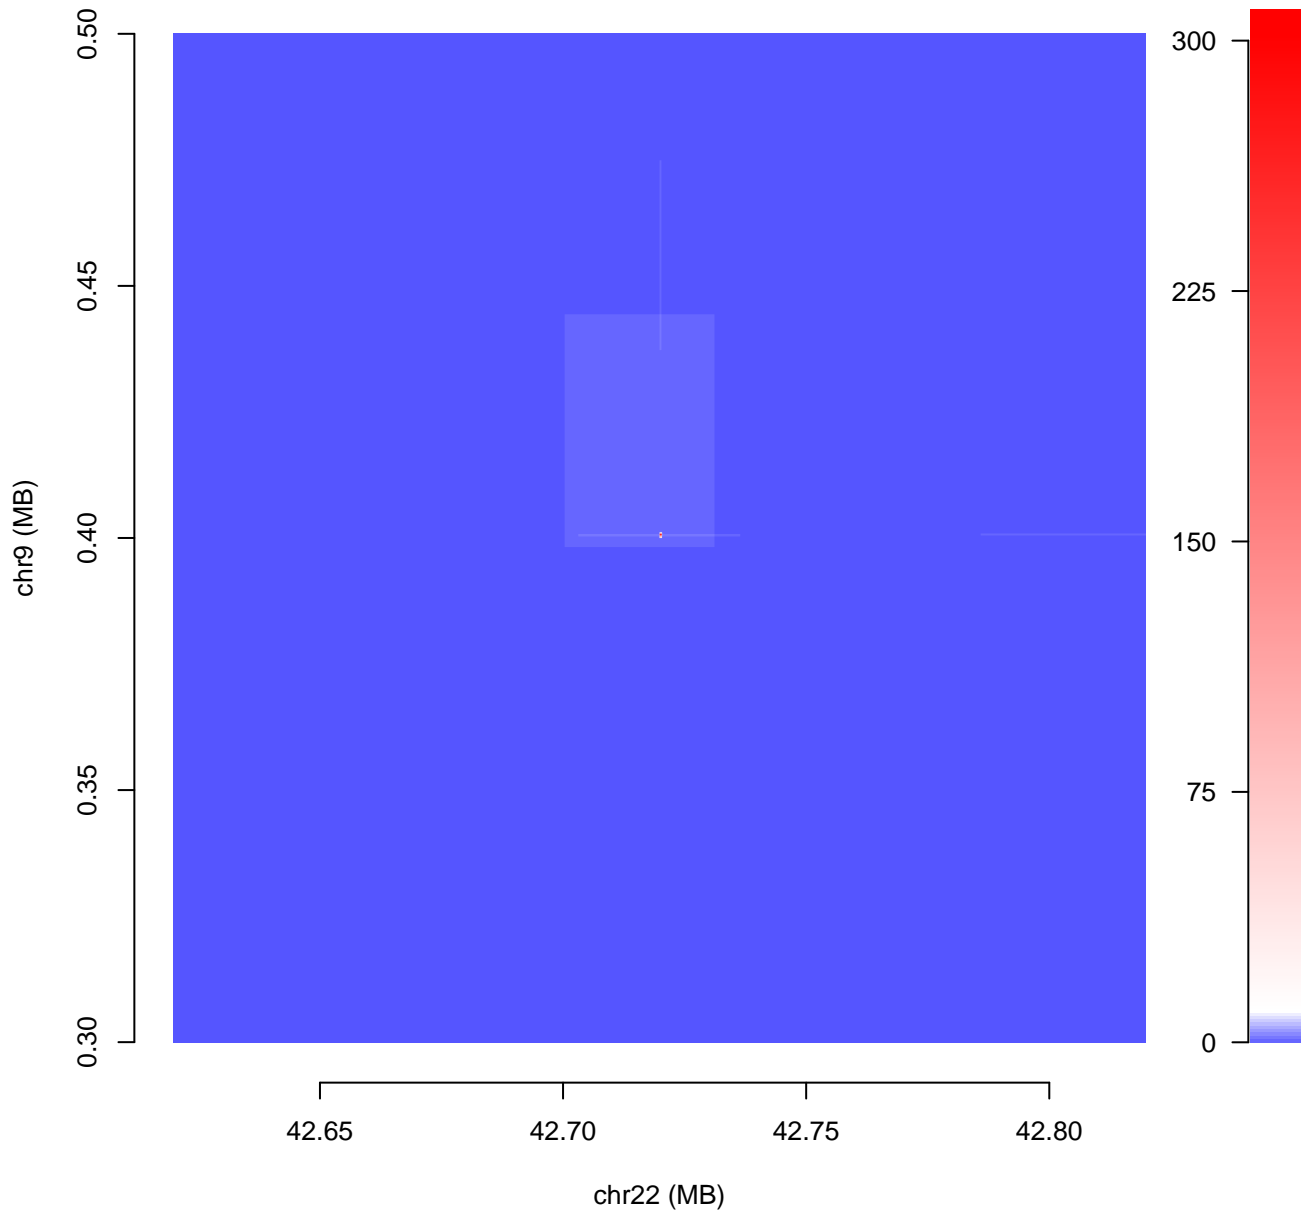

Supplement: Supplemental_Data.zip [file event_169.pdf › event_169.pdf]

Barcode

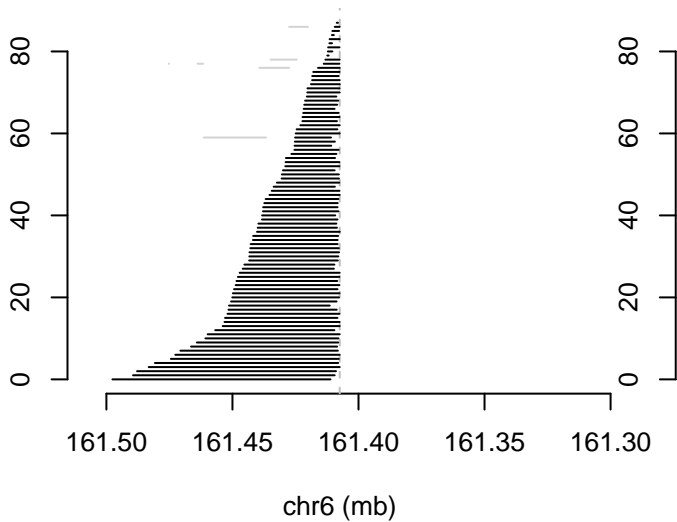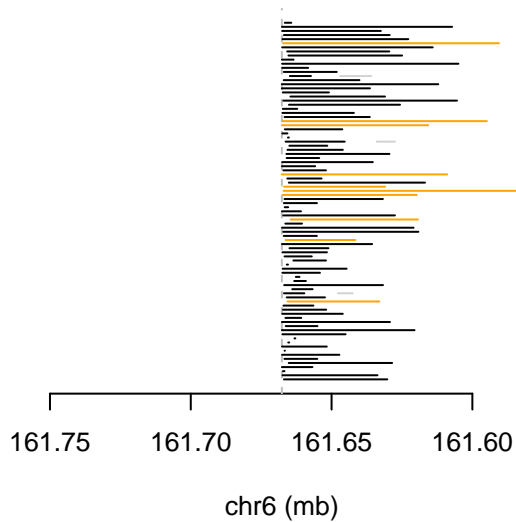

Copy number

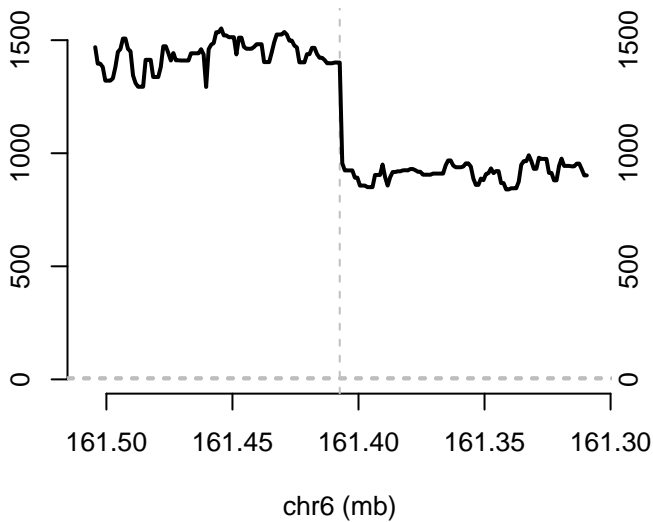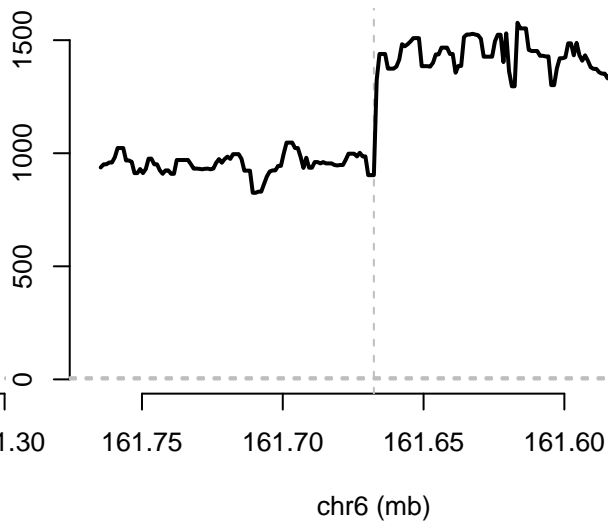

K562 chr6:161,407,438::chr6:161,667,645-+

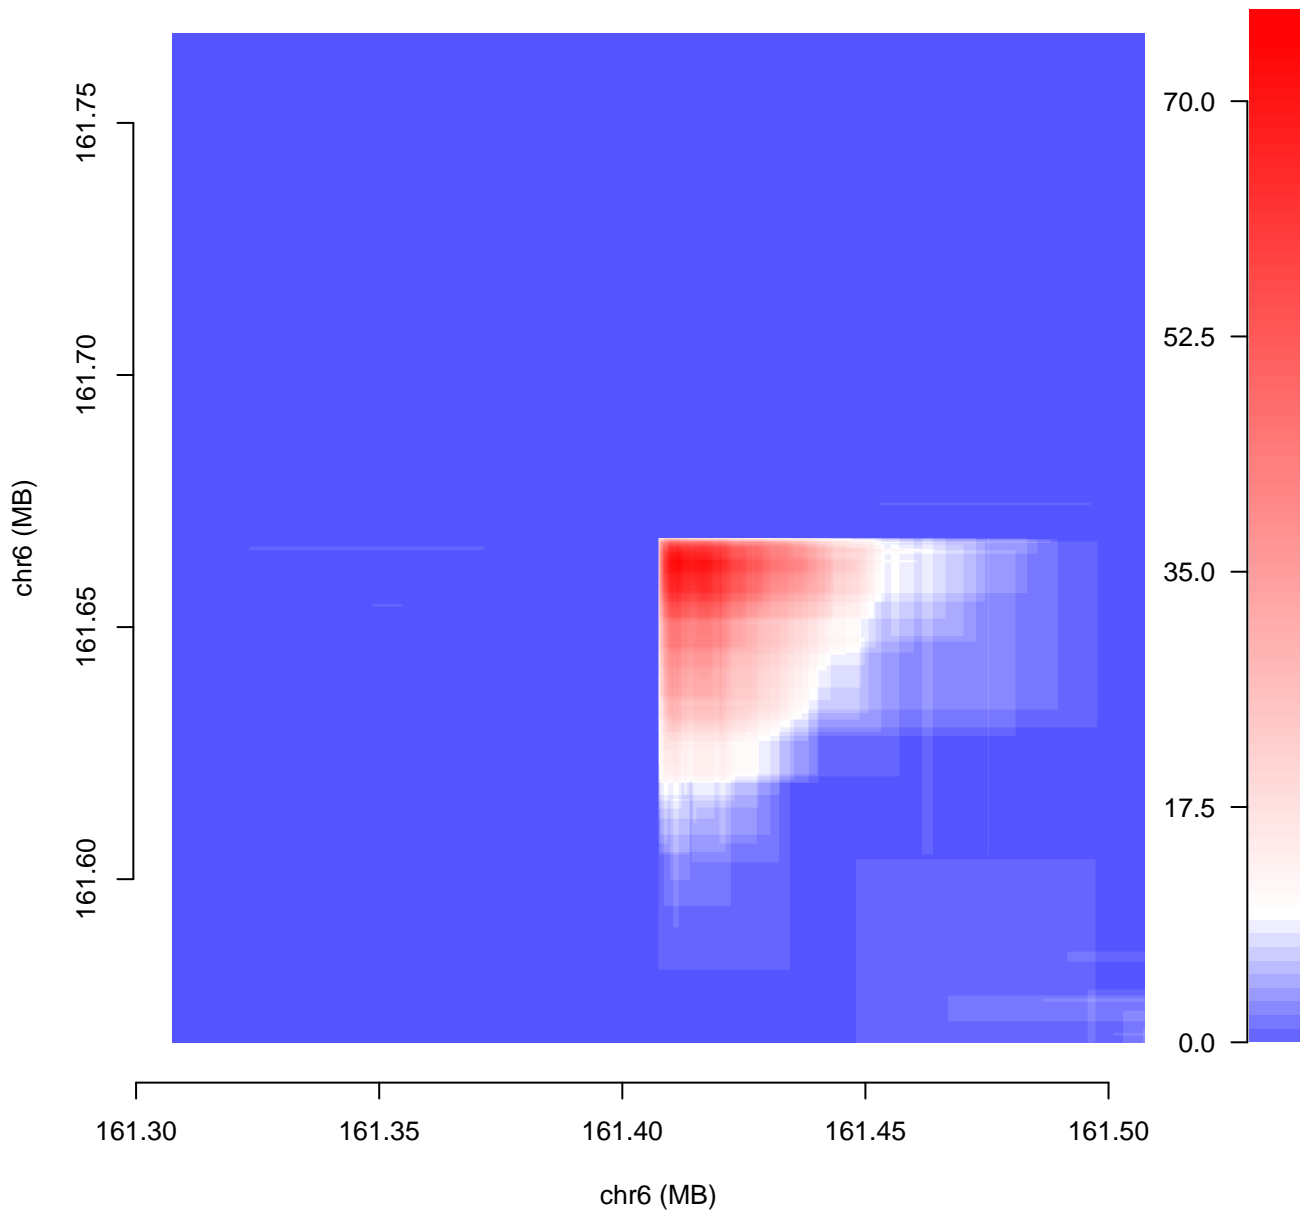

Supplement: Supplemental_Data.zip [file event_17.pdf › event_17.pdf]

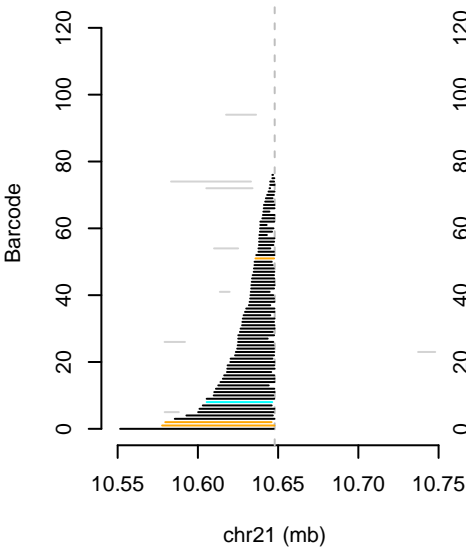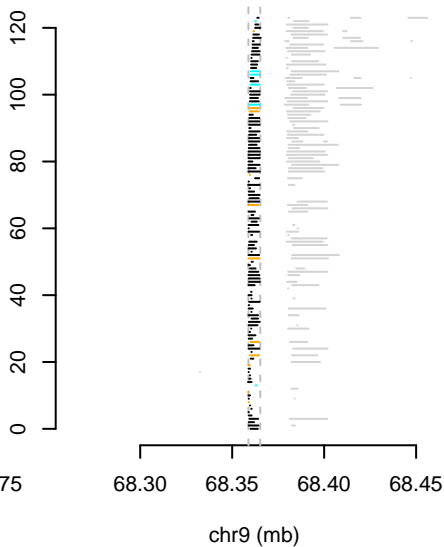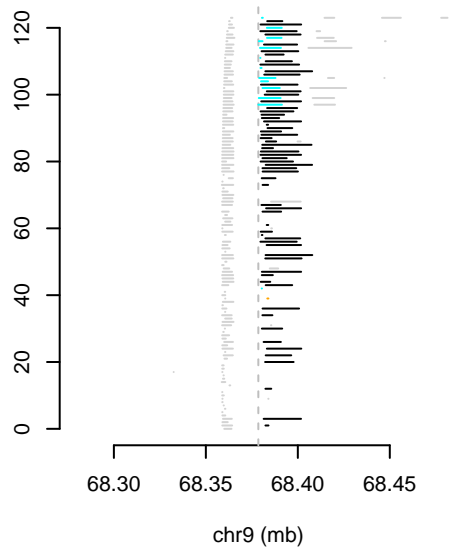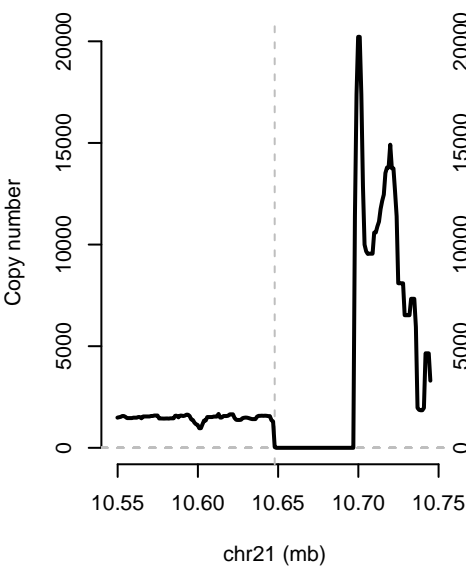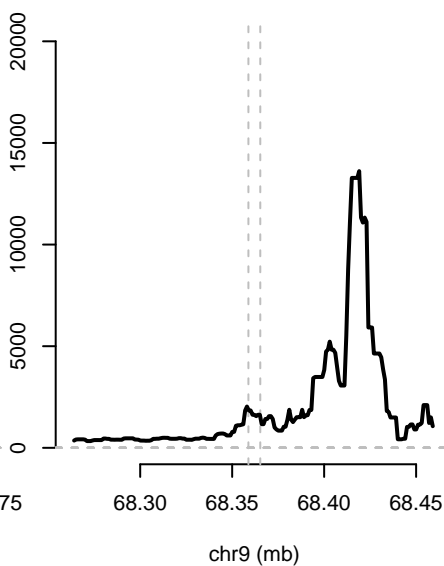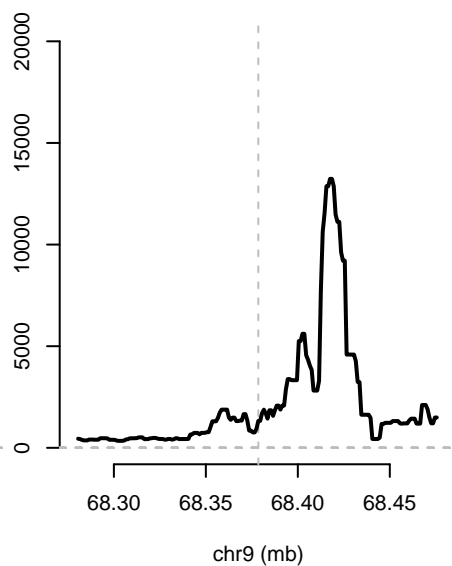

K562 chr9:68,358,828::chr21:10,647,861-+

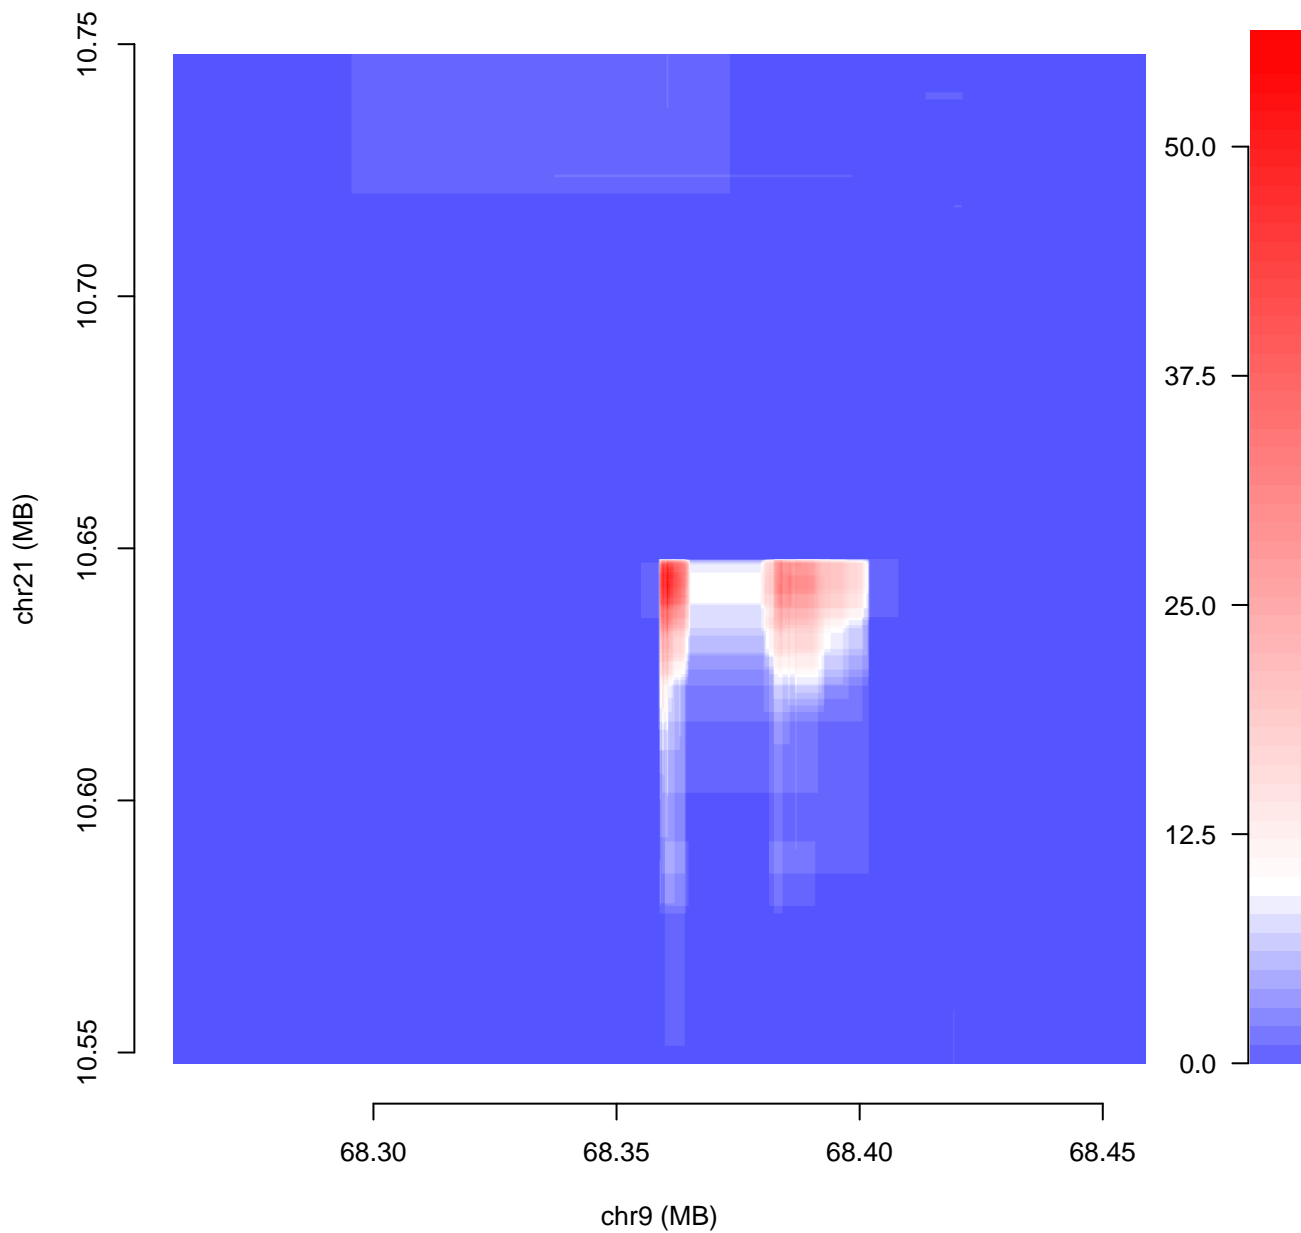

K562 chr9:68,358,828::chr9:68,365,277-+

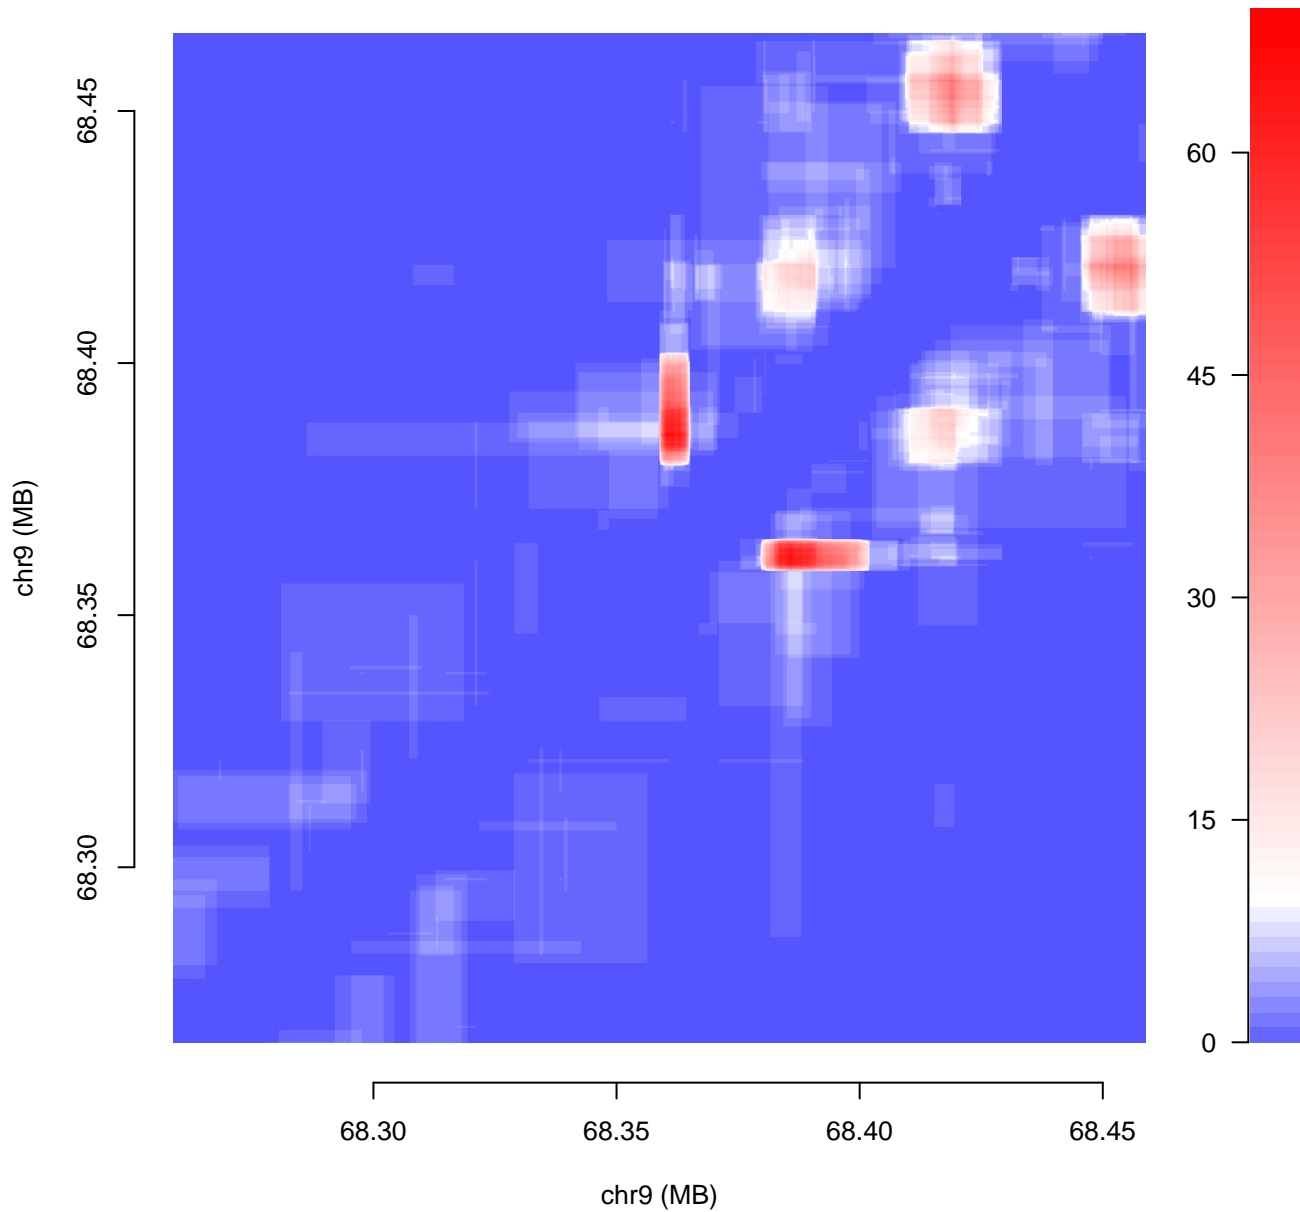

K562 chr9:68,365,277::chr9:68,378,536+-

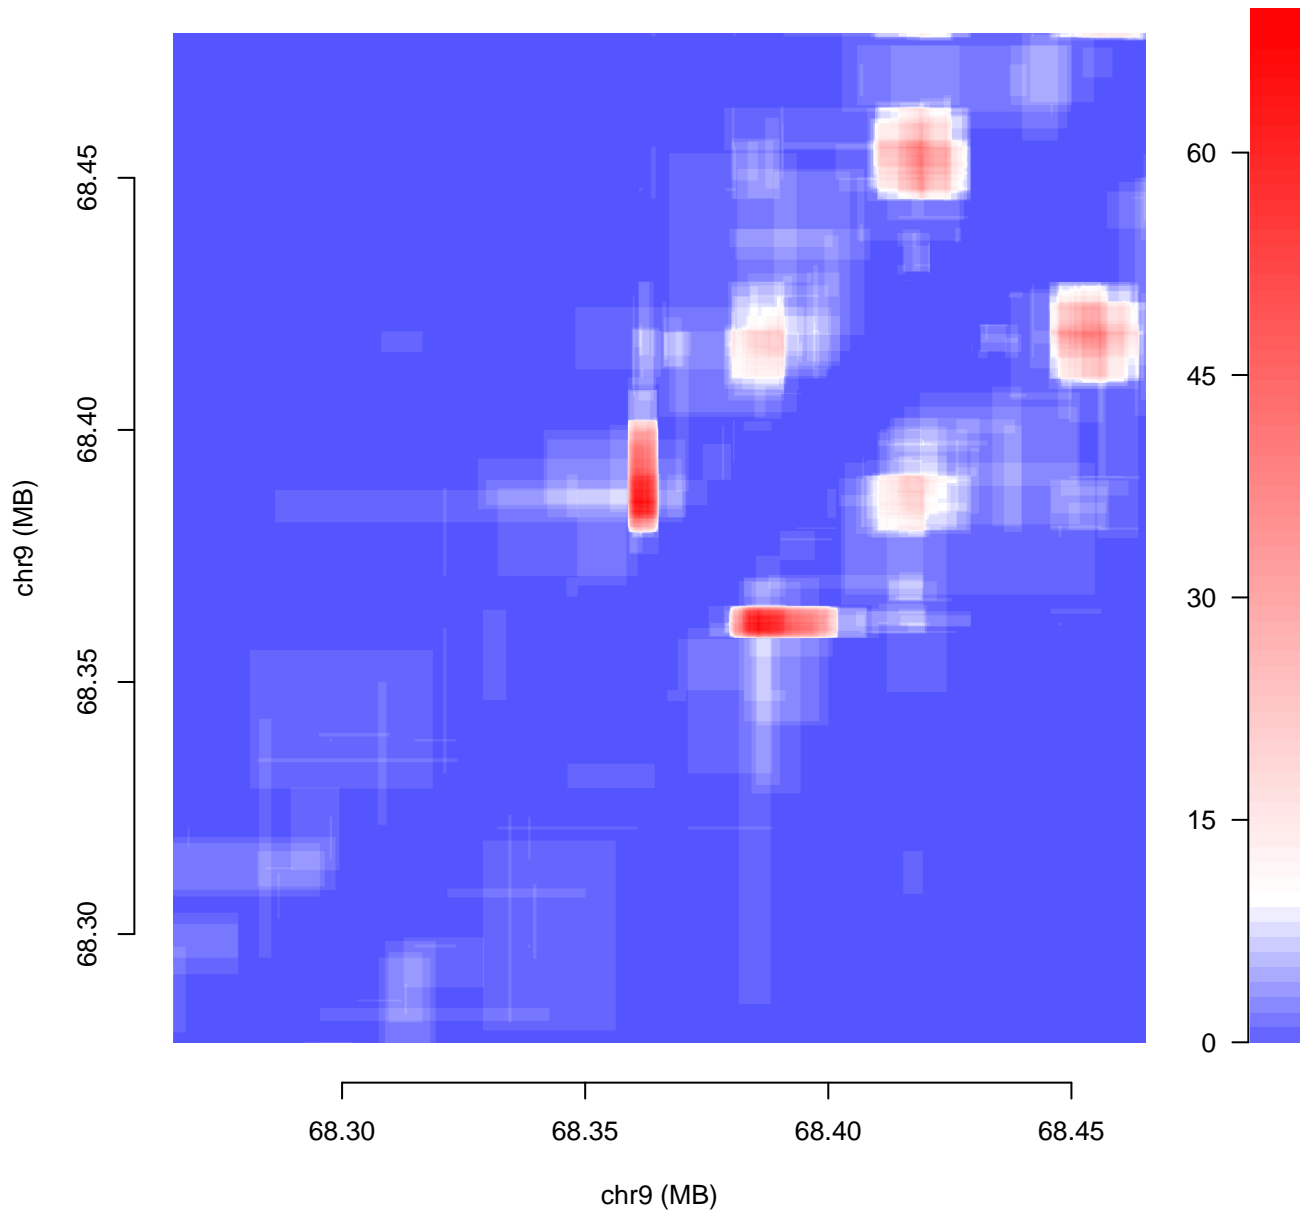

Supplement: Supplemental_Data.zip [file event_170.pdf › event_170.pdf]

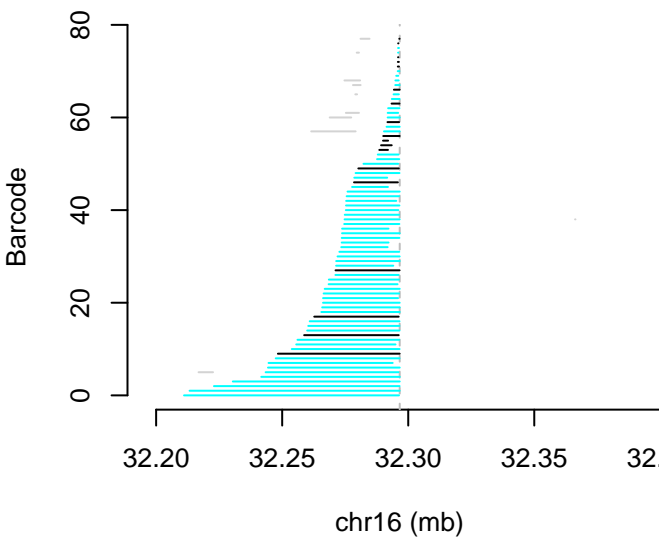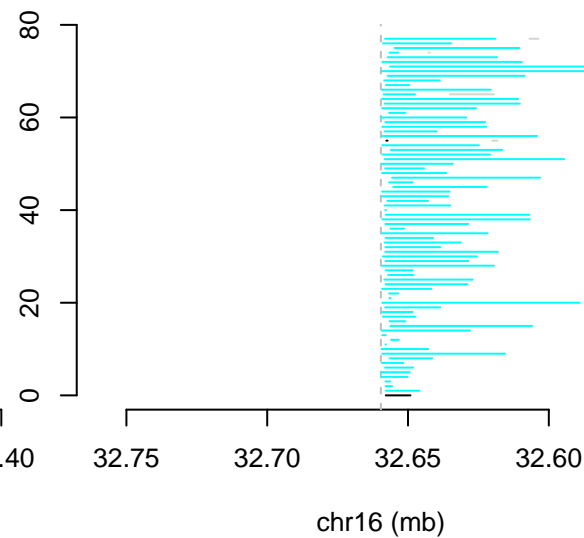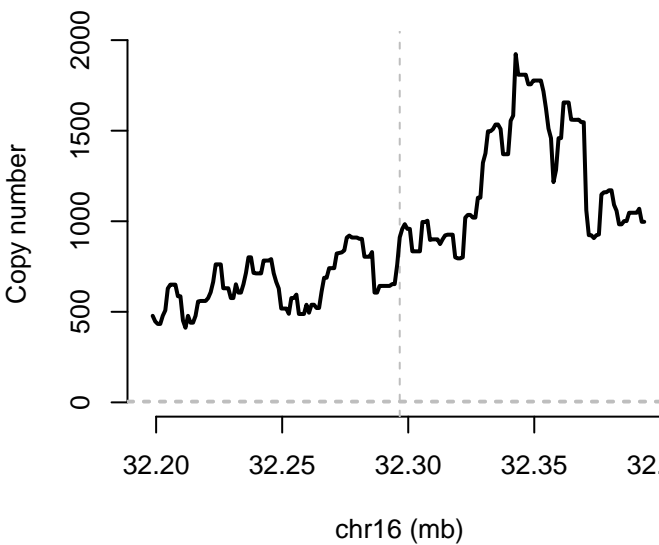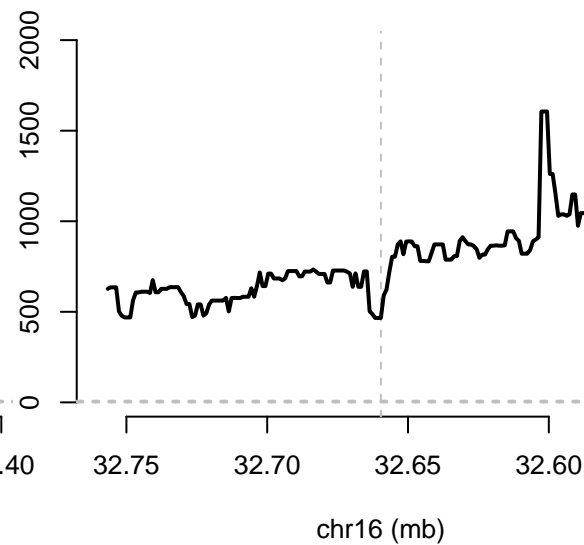

K562 chr16:32,659,634::chr16:32,296,632++

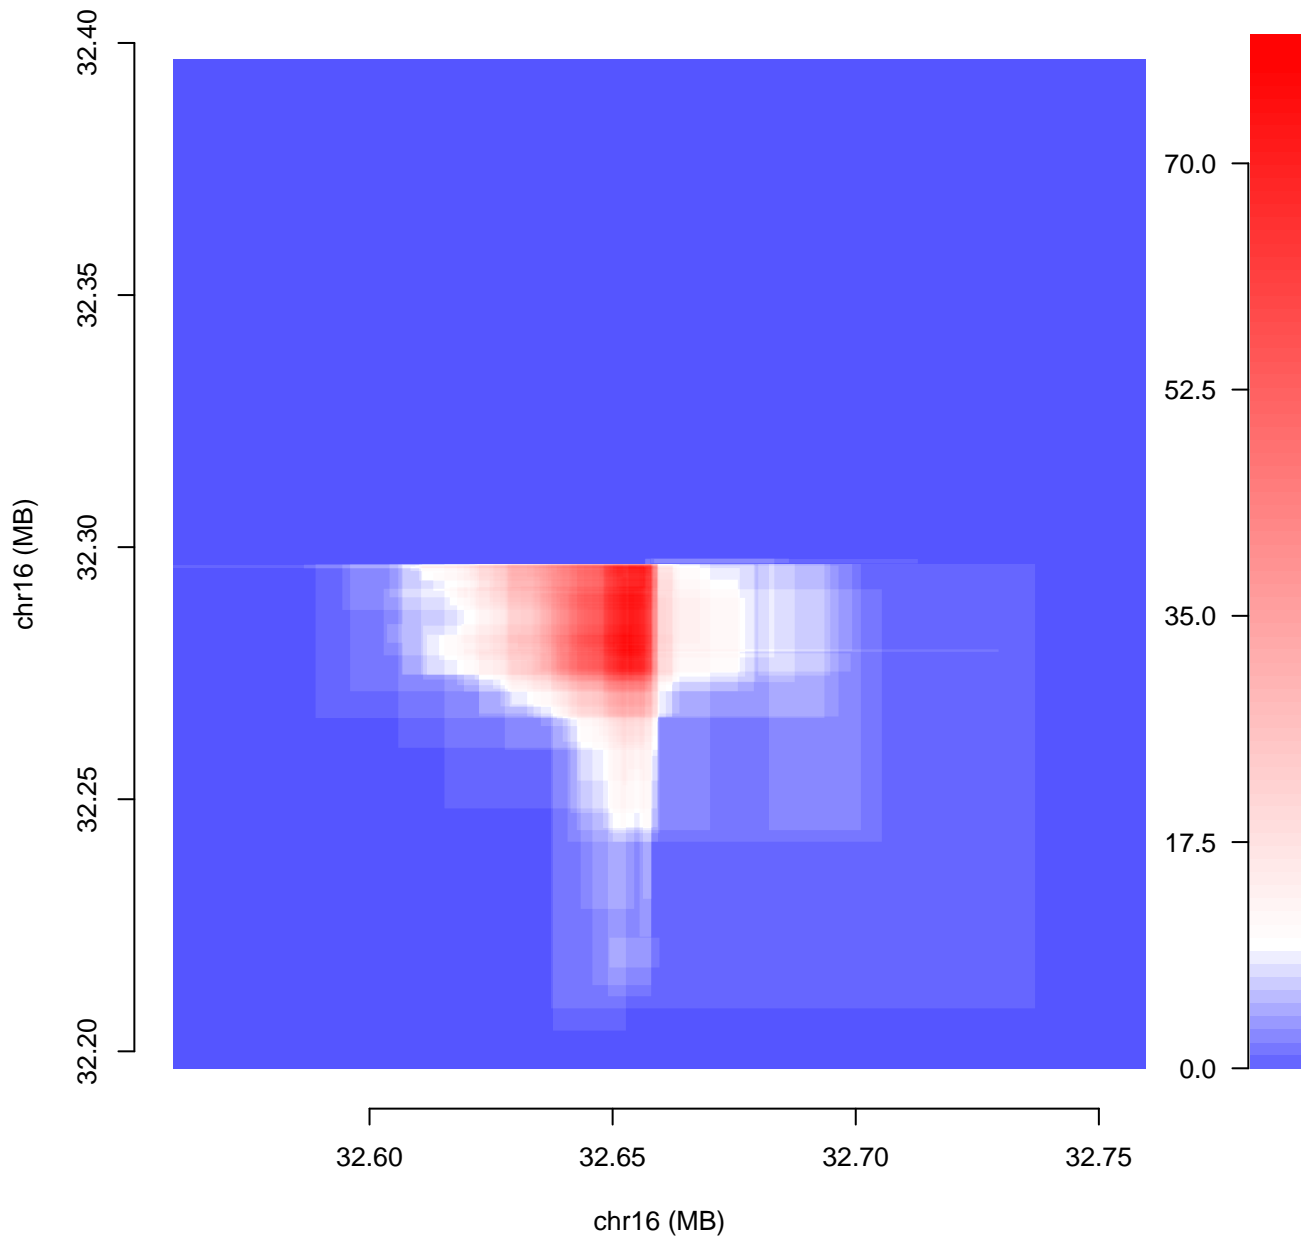

Supplement: Supplemental_Data.zip [file event_171.pdf › event_171.pdf]

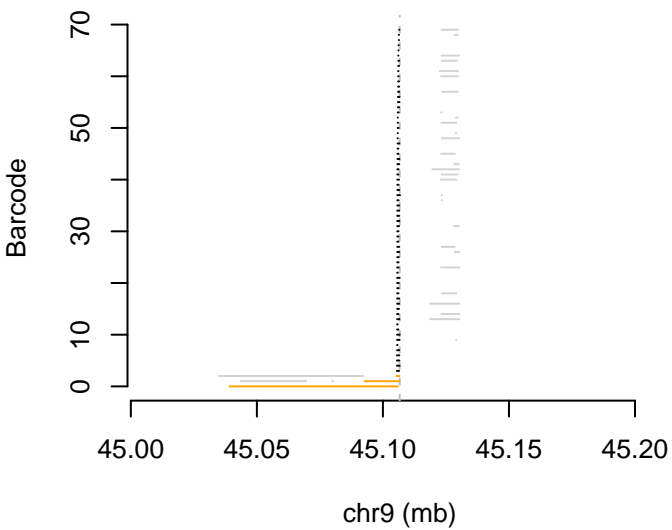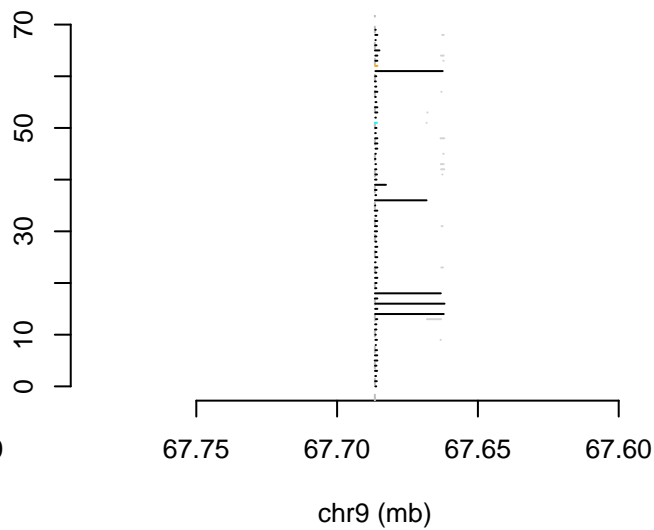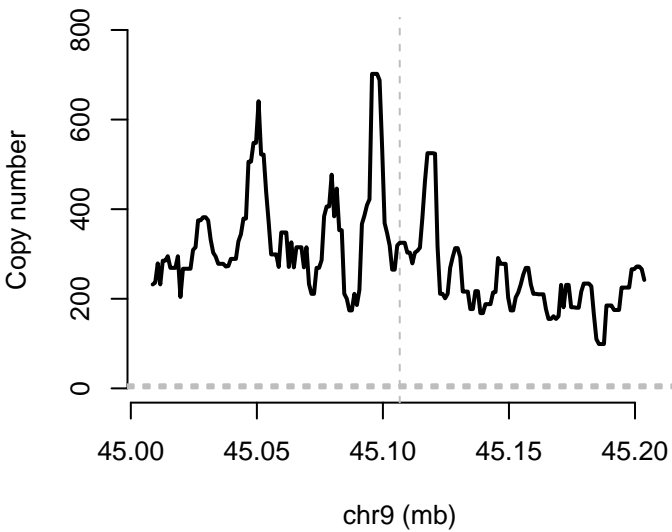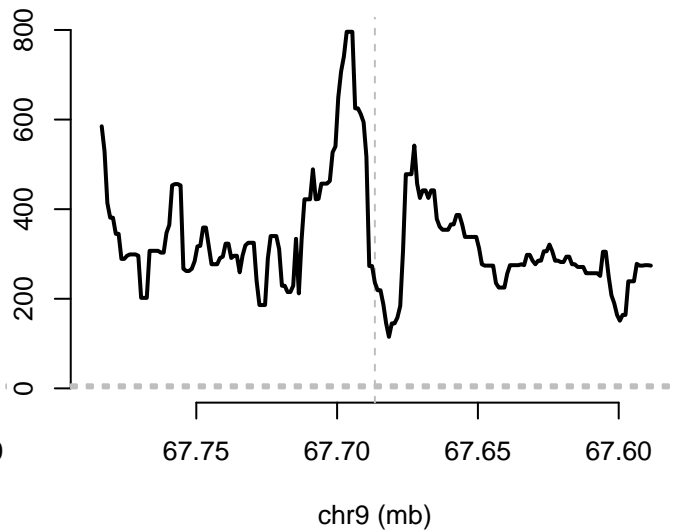

K562 chr9:45,106,675::chr9:67,686,591++

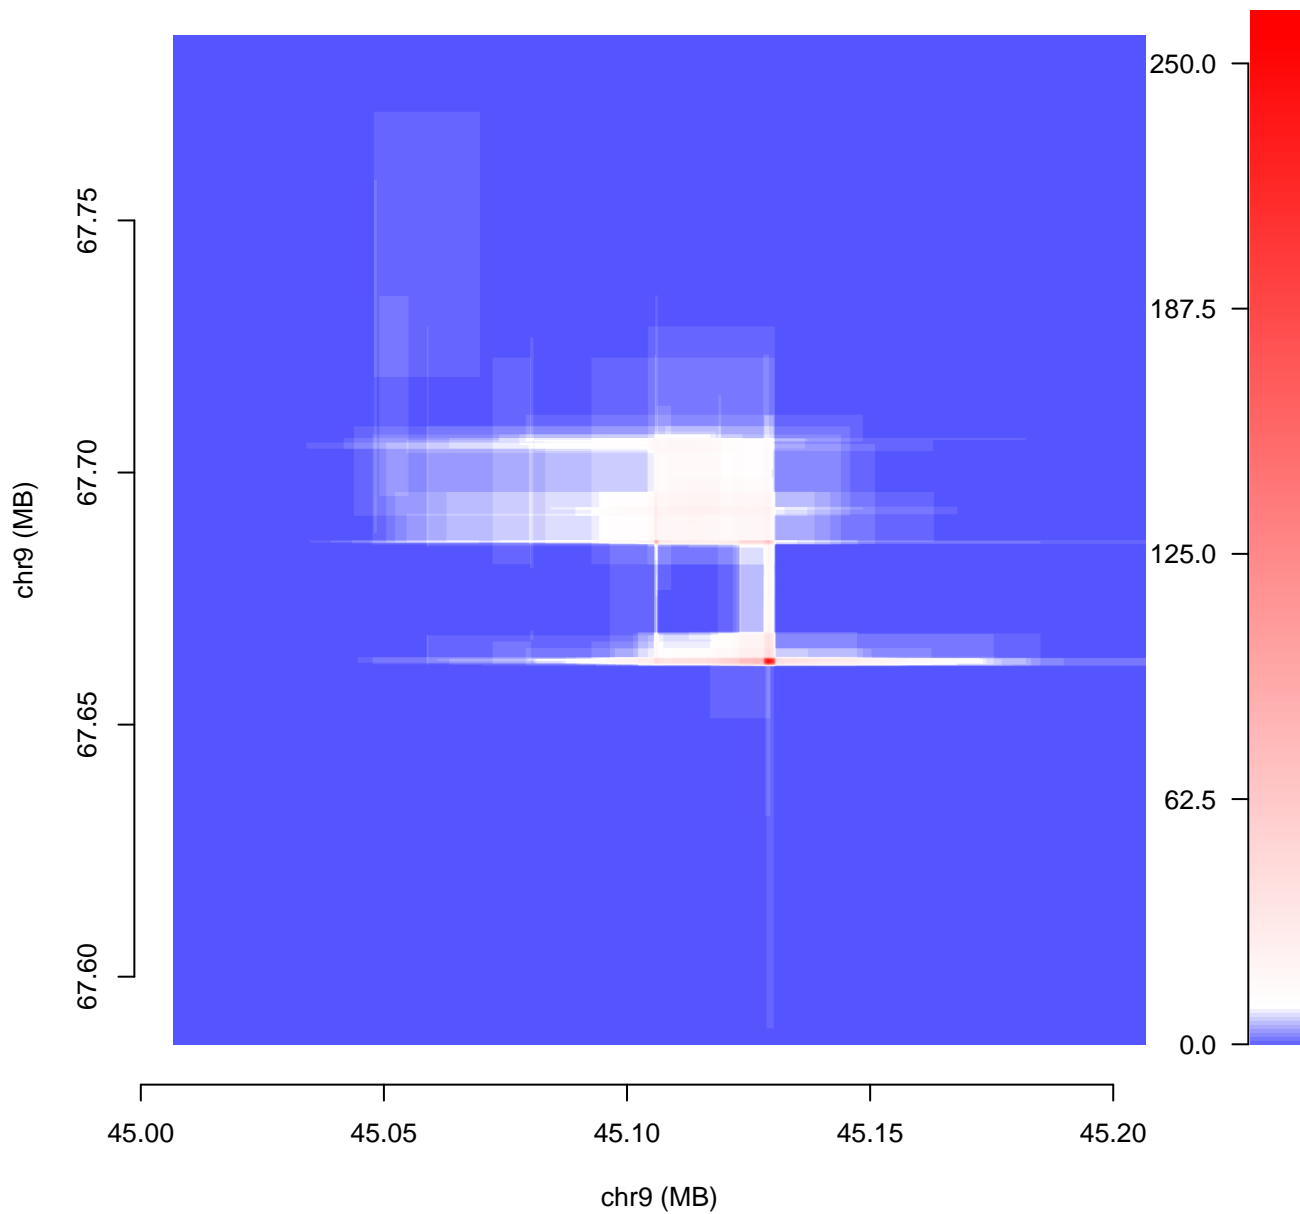

Supplement: Supplemental_Data.zip [file event_172.pdf › event_172.pdf]

Barcode

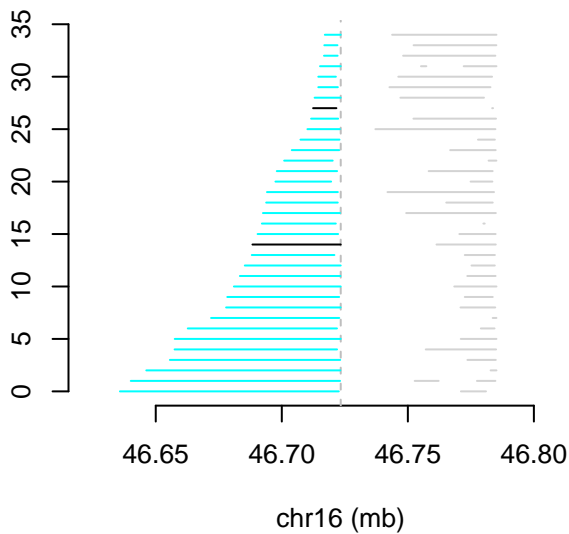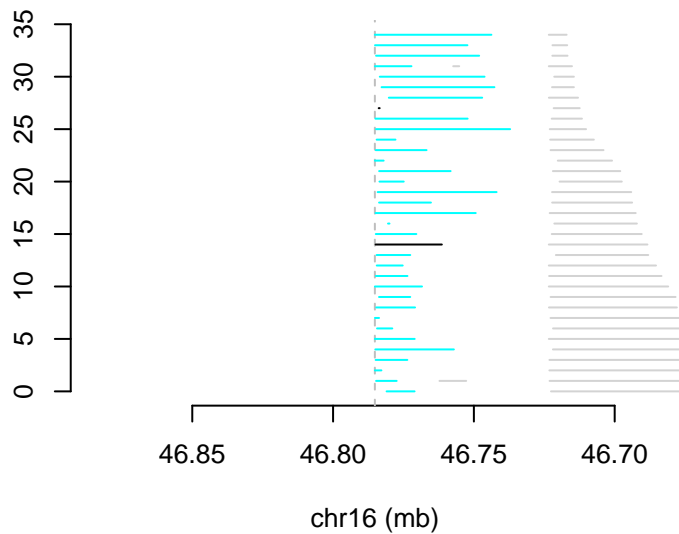

Copy number

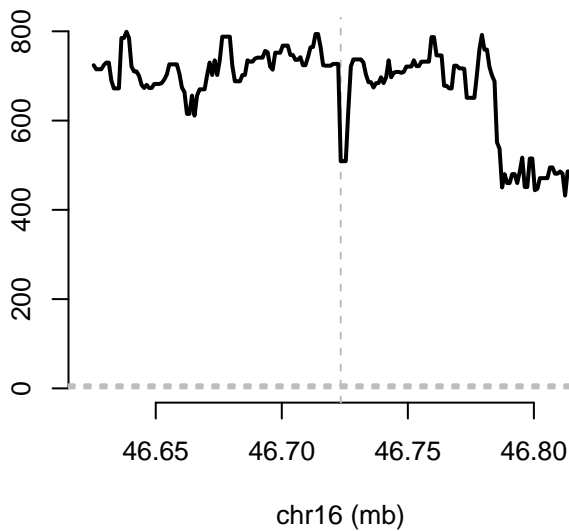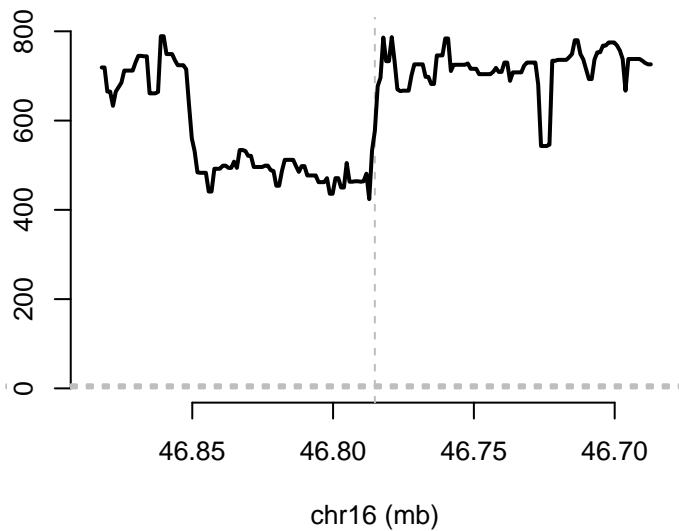

K562 chr16:46,785,155::chr16:46,723,383++

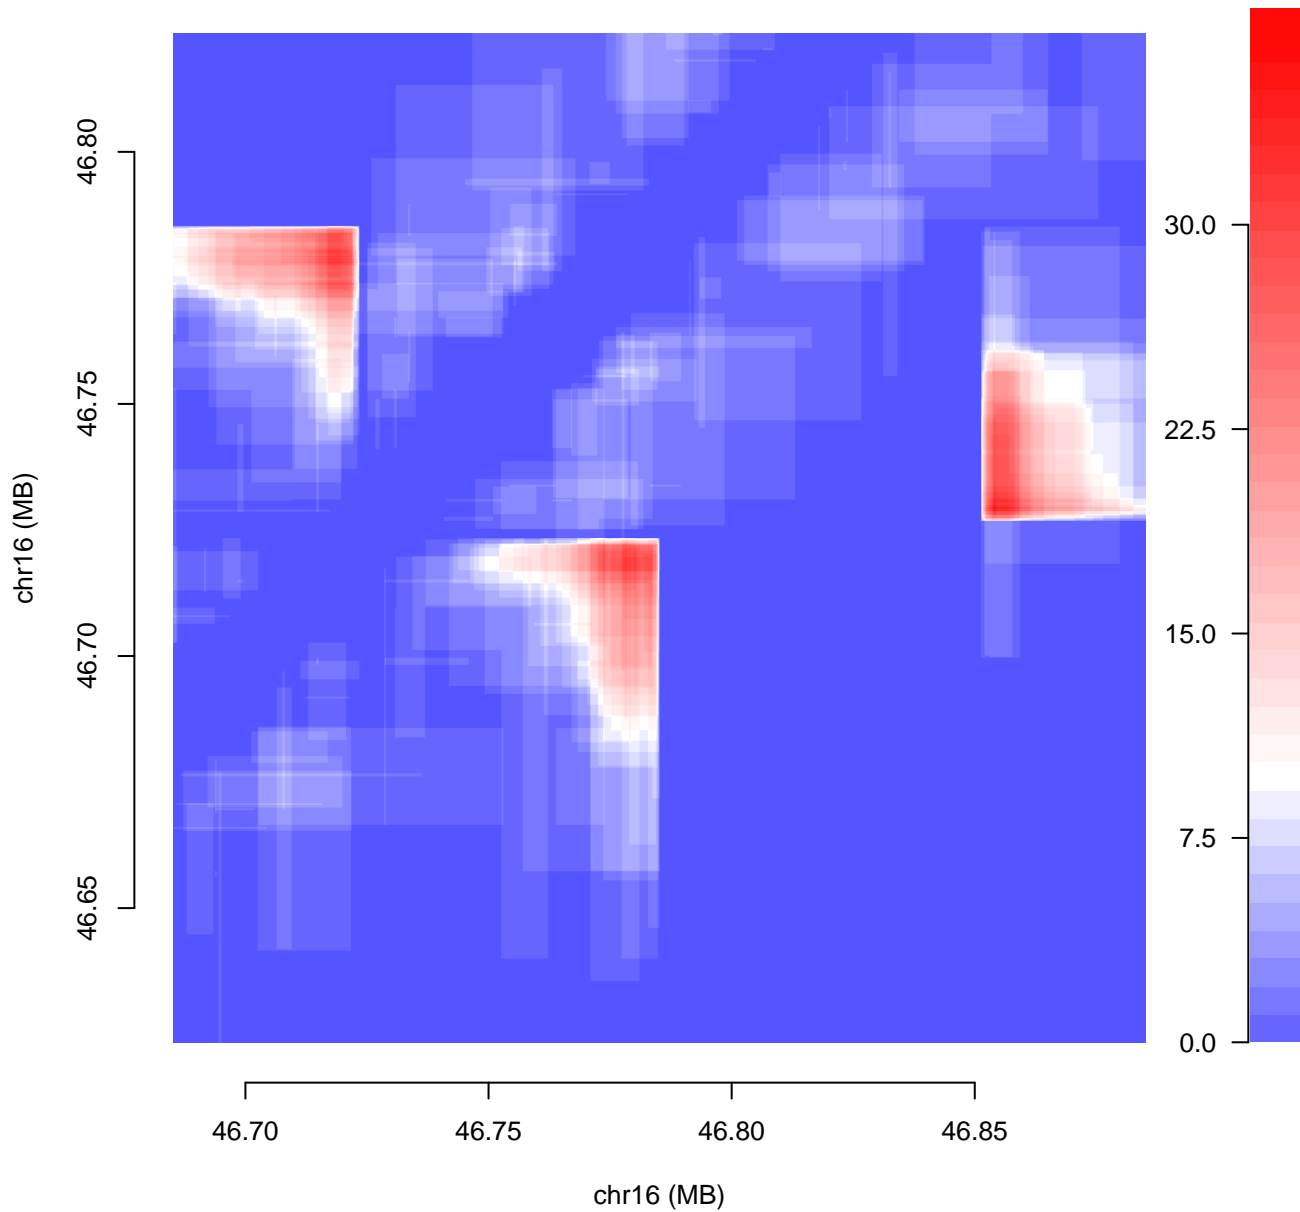

Supplement: Supplemental_Data.zip [file event_173.pdf › event_173.pdf]

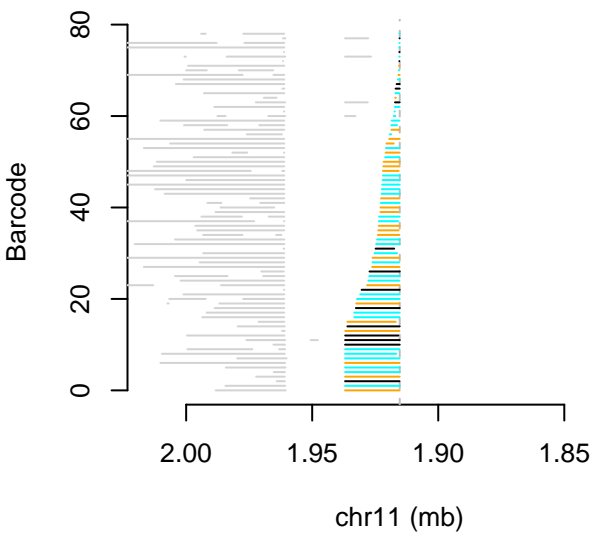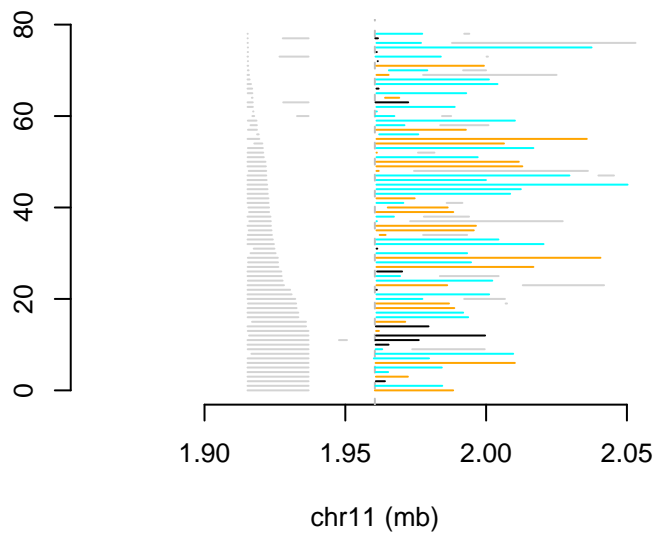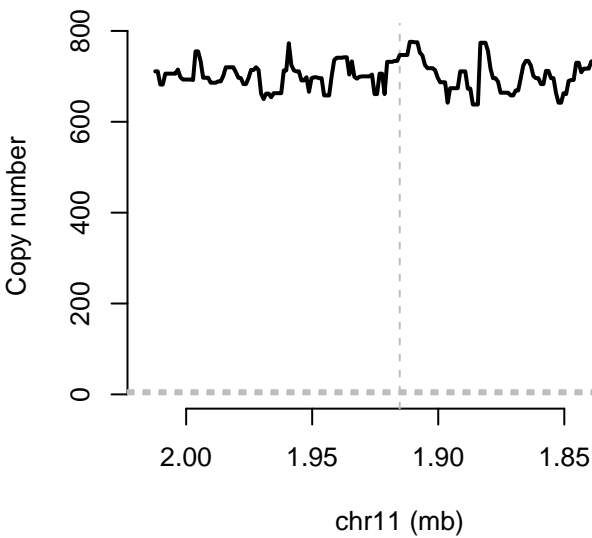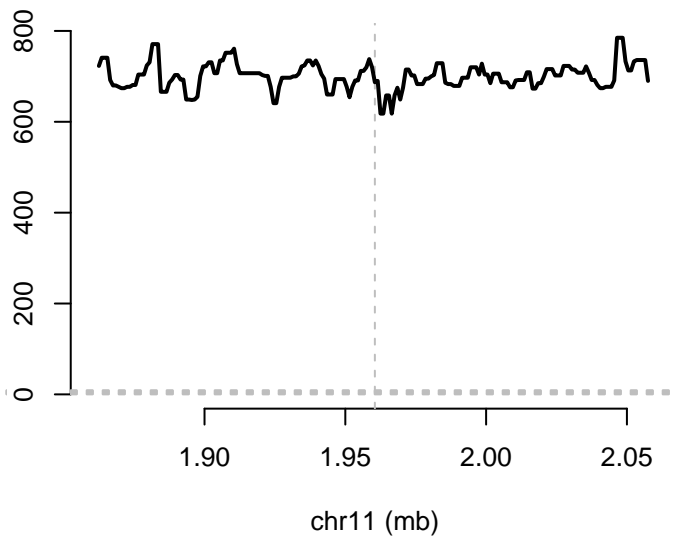

K562 chr11:1,960,498::chr11:1,915,270--

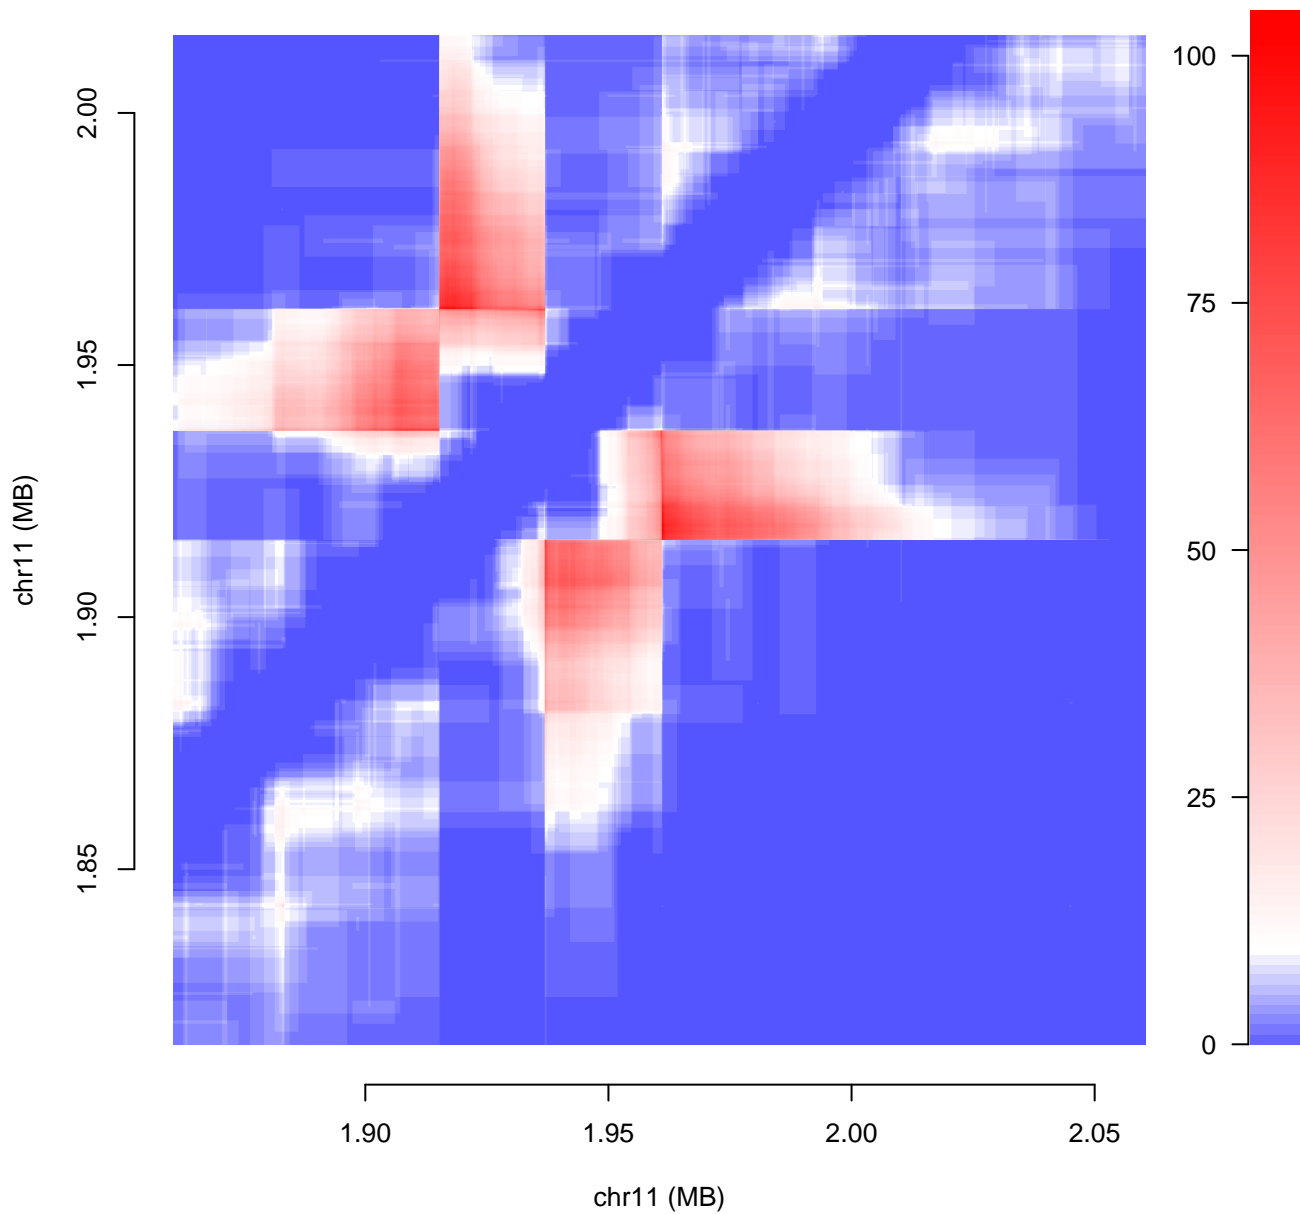

Supplement: Supplemental_Data.zip [file event_174.pdf › event_174.pdf]

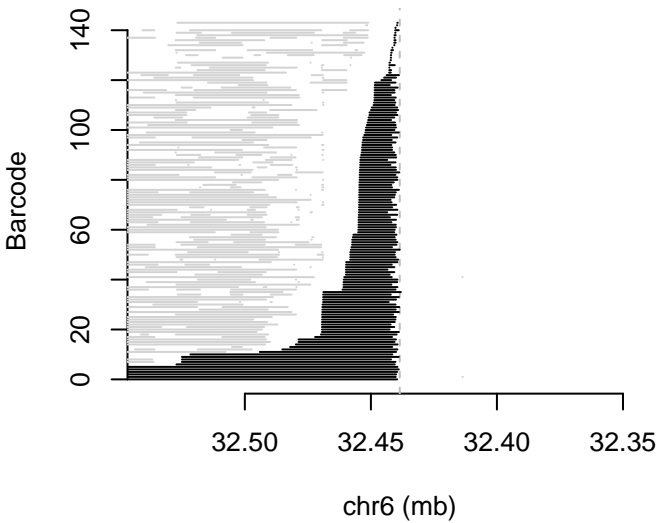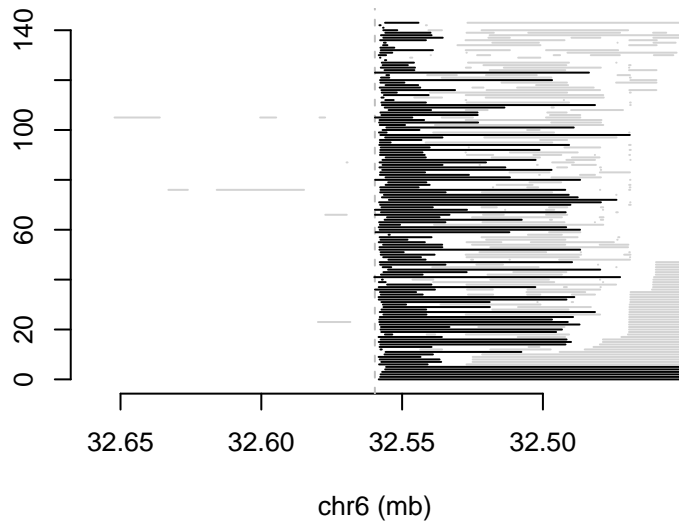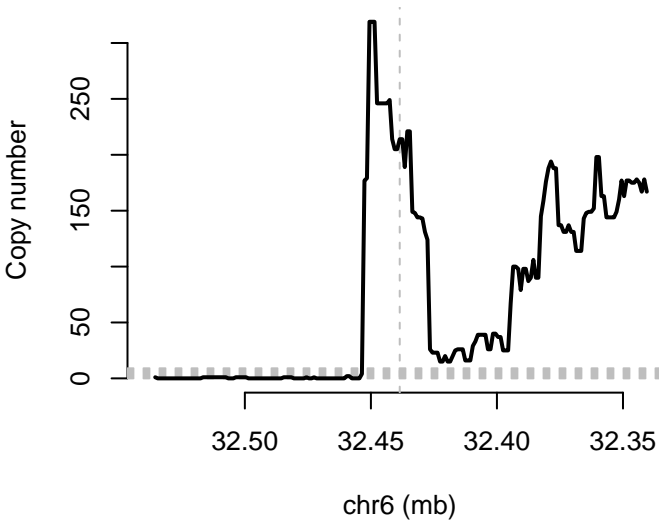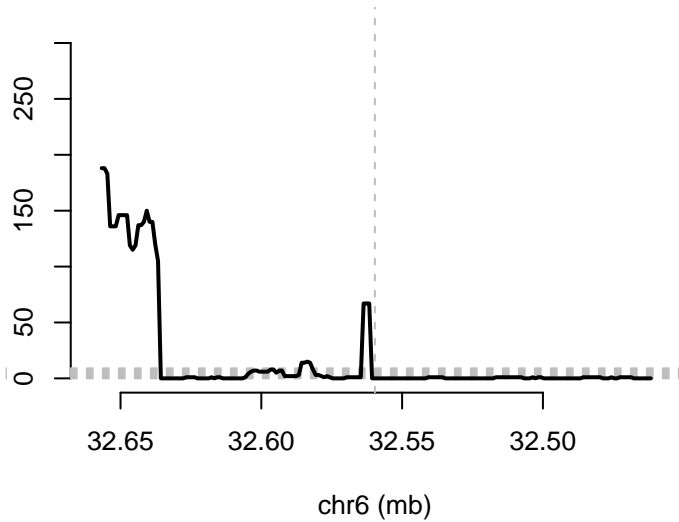

K562 chr6:32,559,680::chr6:32,438,558+-

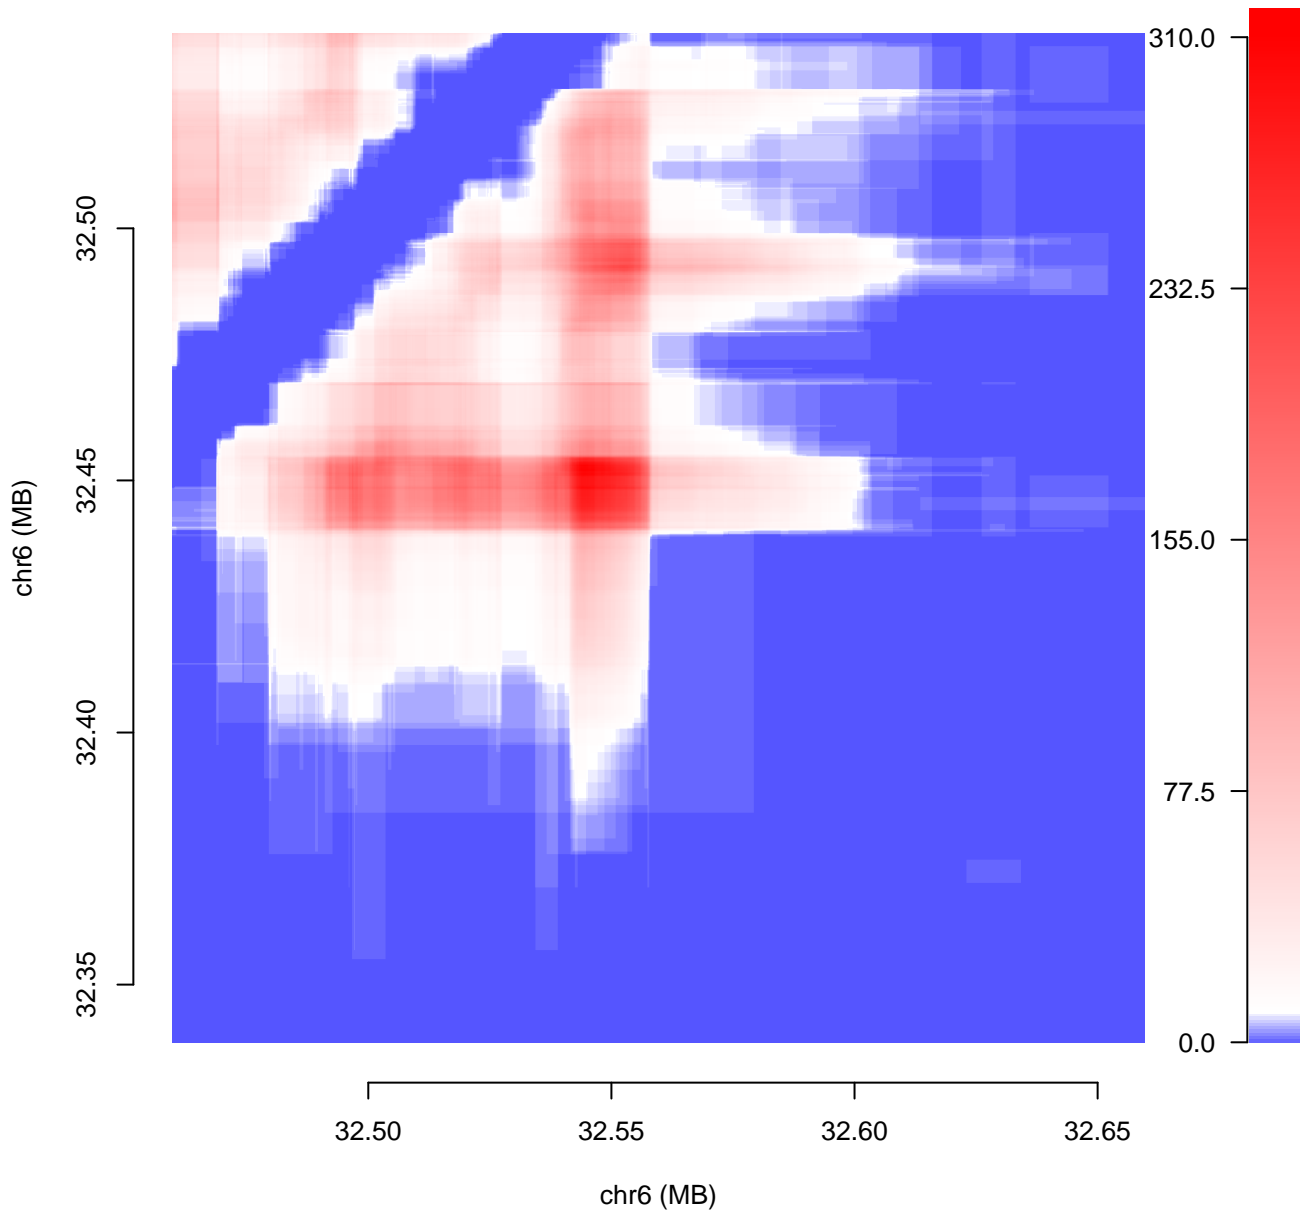

Supplement: Supplemental_Data.zip [file event_175.pdf › event_175.pdf]

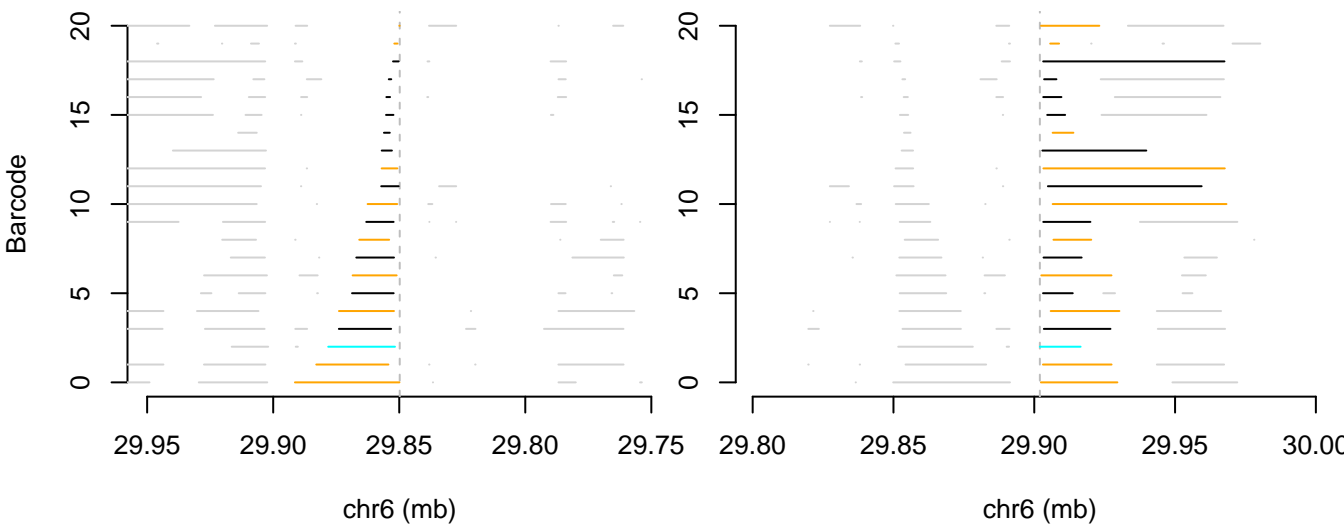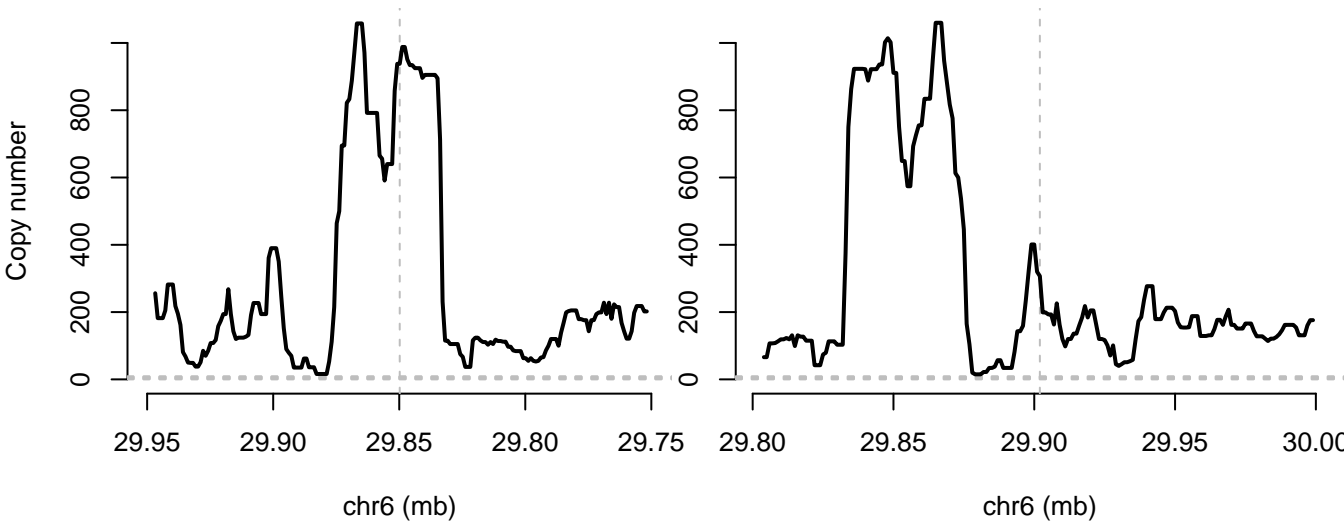

K562 chr6:29,901,993::chr6:29,849,803--

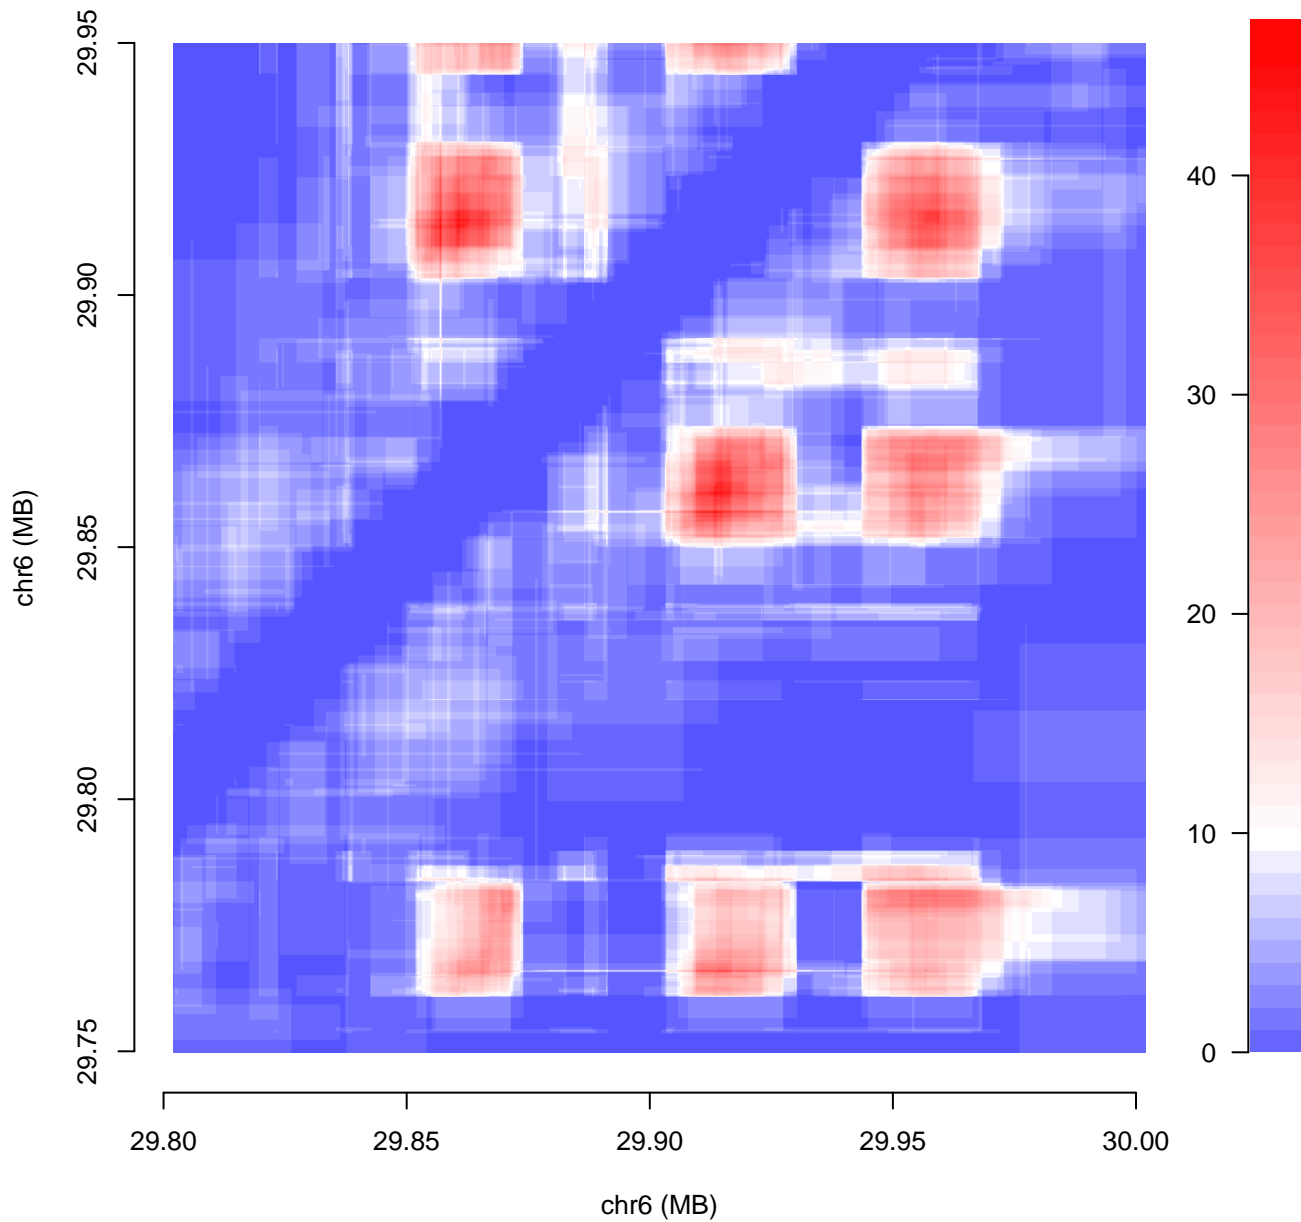

Supplement: Supplemental_Data.zip [file event_176.pdf › event_176.pdf]

Barcode

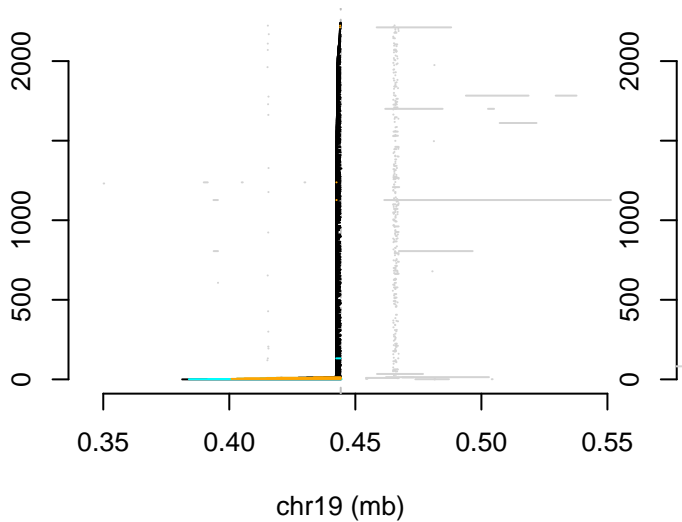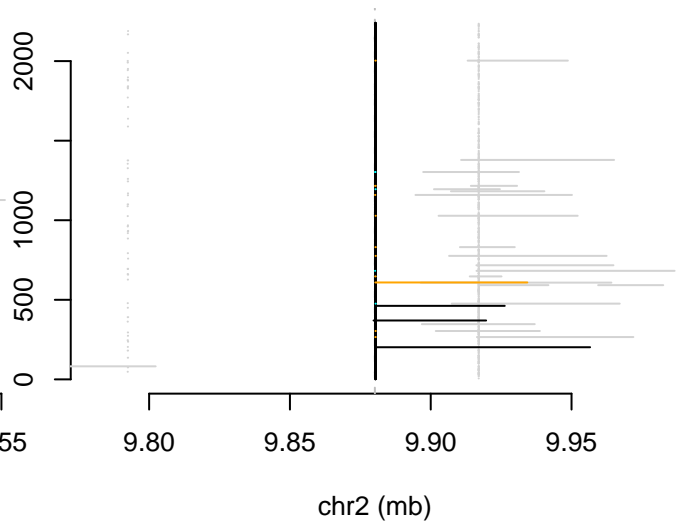

Copy number

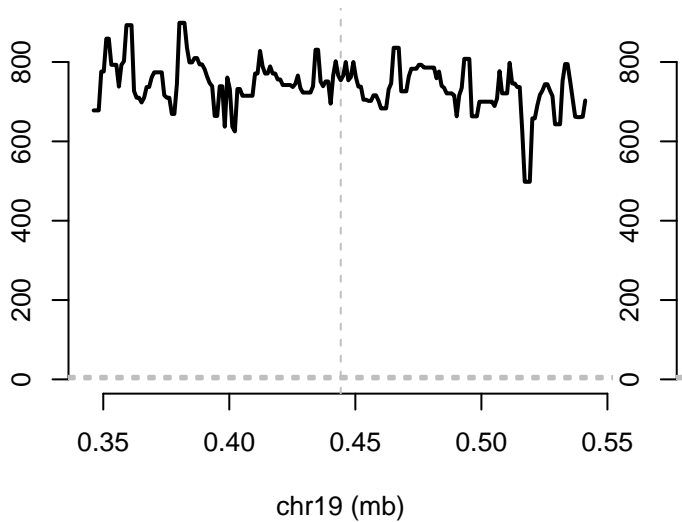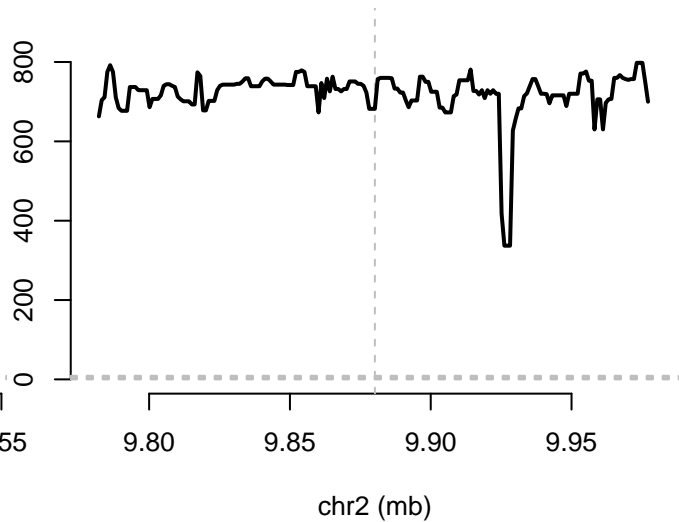

K562 chr2:9,880,164::chr19:444,206--+

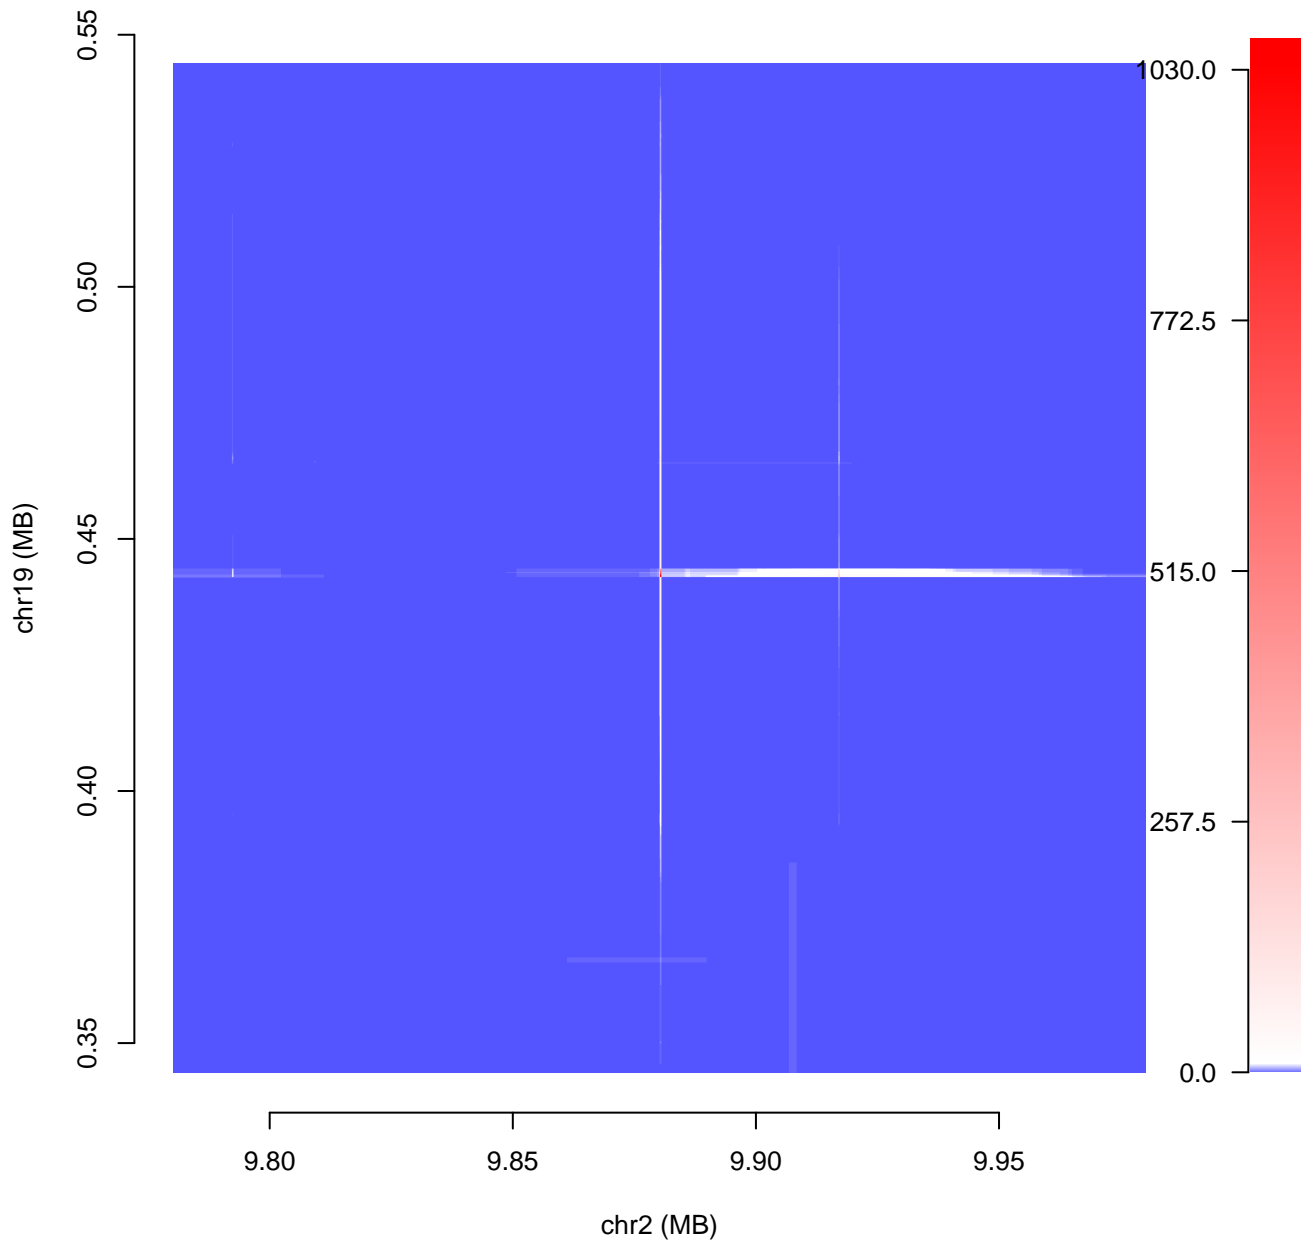

Supplement: Supplemental_Data.zip [file event_177.pdf › event_177.pdf]

Barcode

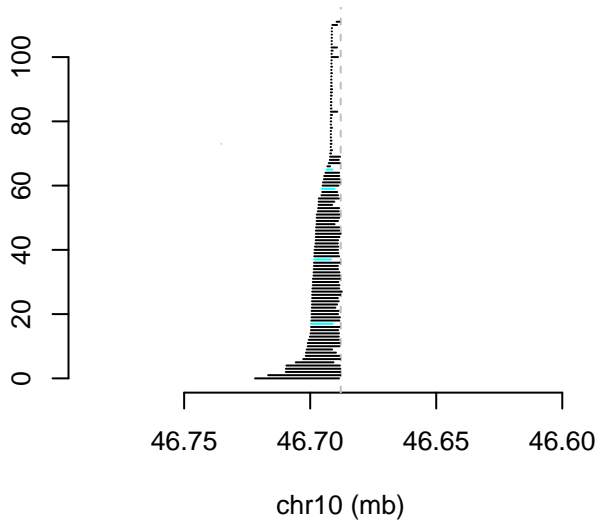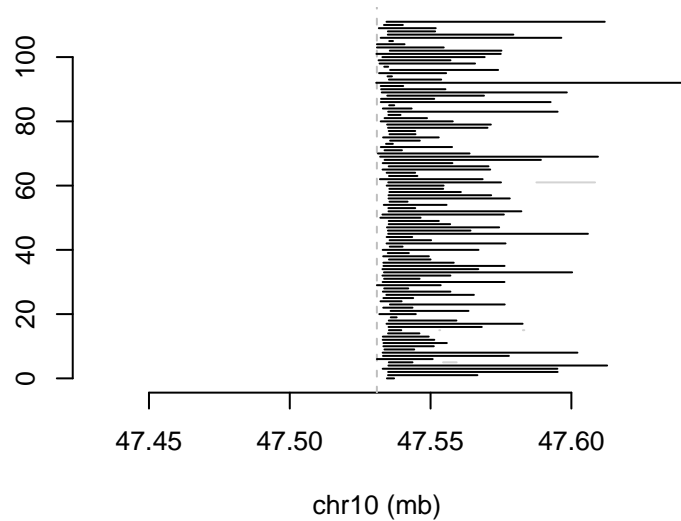

Copy number

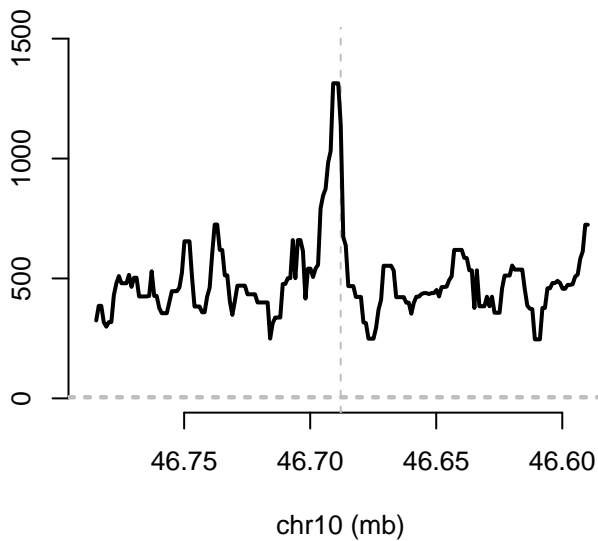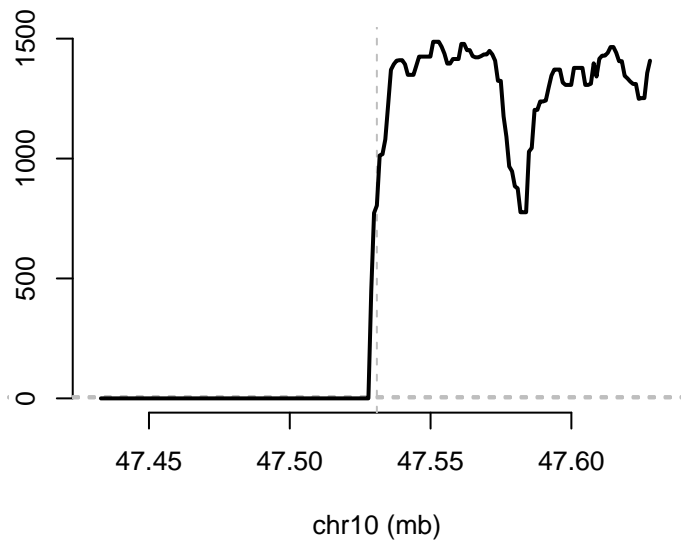

K562 chr10:46,687,879::chr10:47,530,927--

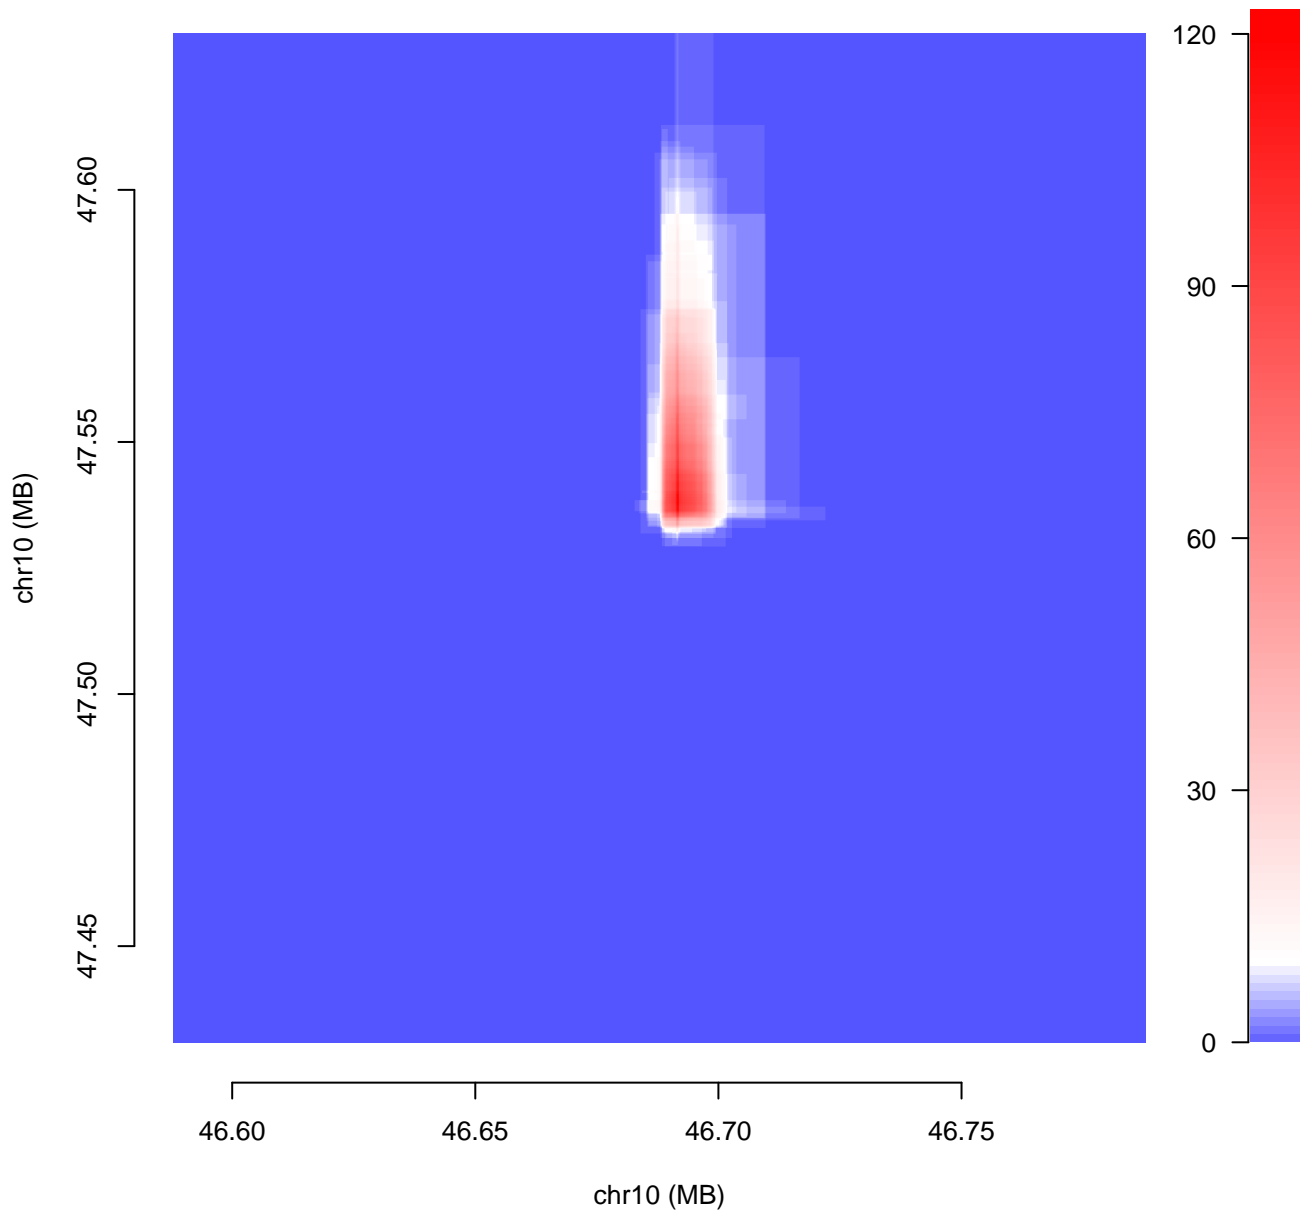

Supplement: Supplemental_Data.zip [file event_178.pdf › event_178.pdf]

Barcode

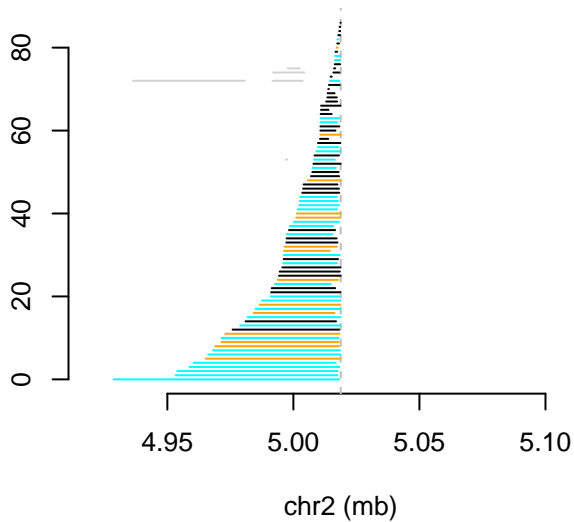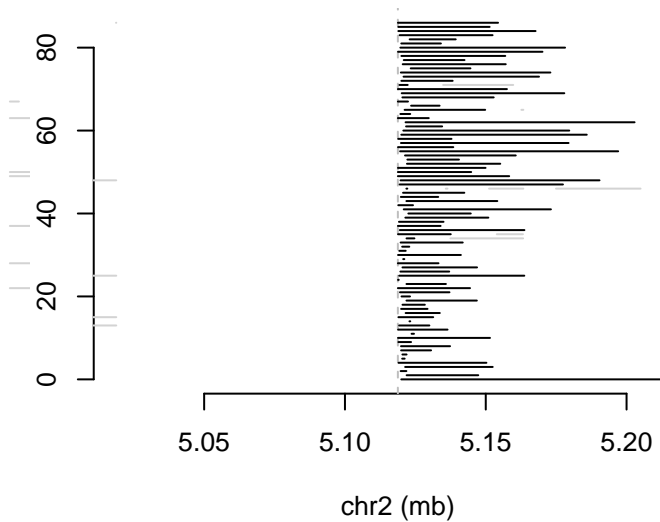

Copy number

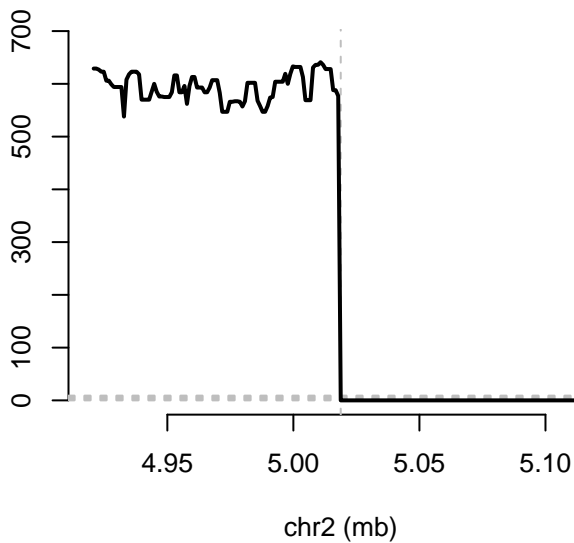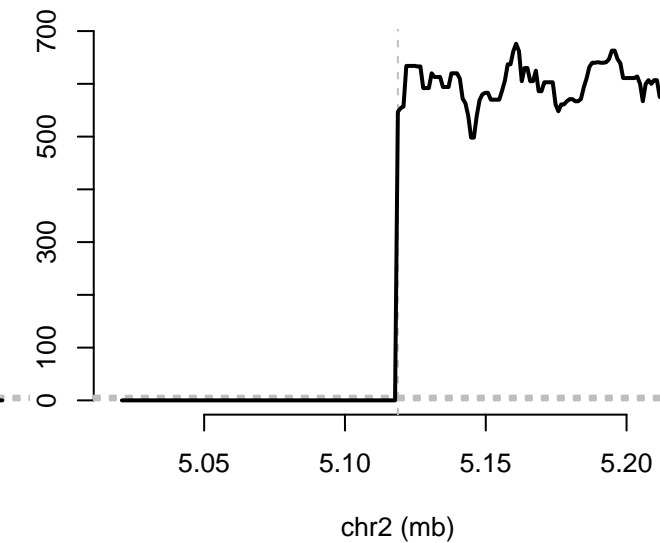

K562 chr2:5,018,788::chr2:5,118,787+-

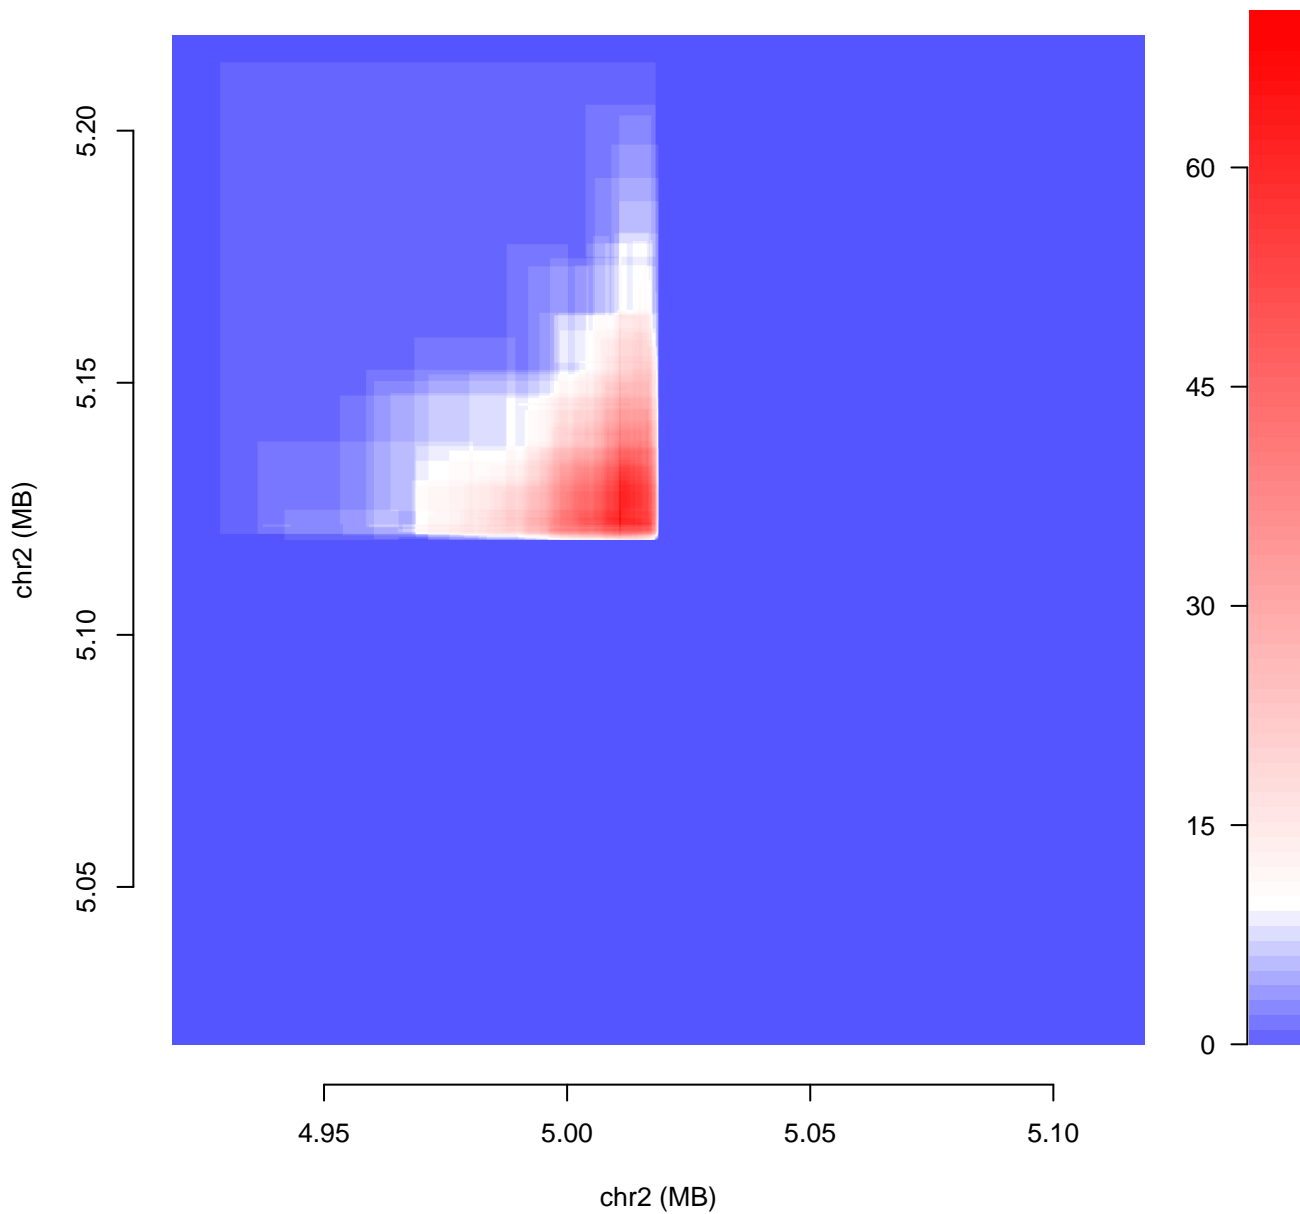

Supplement: Supplemental_Data.zip [file event_179.pdf › event_179.pdf]

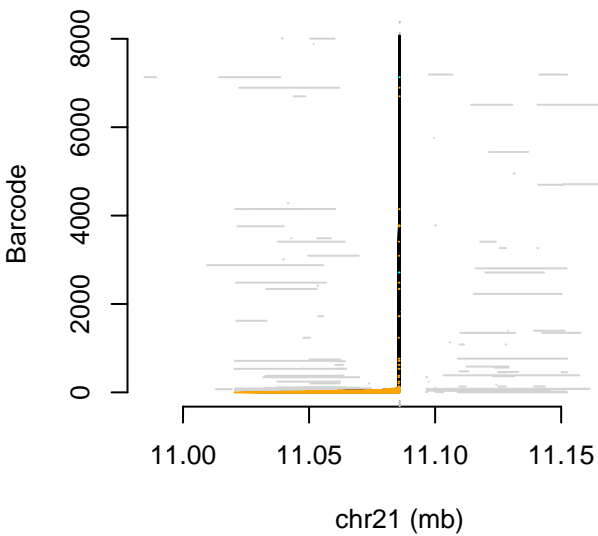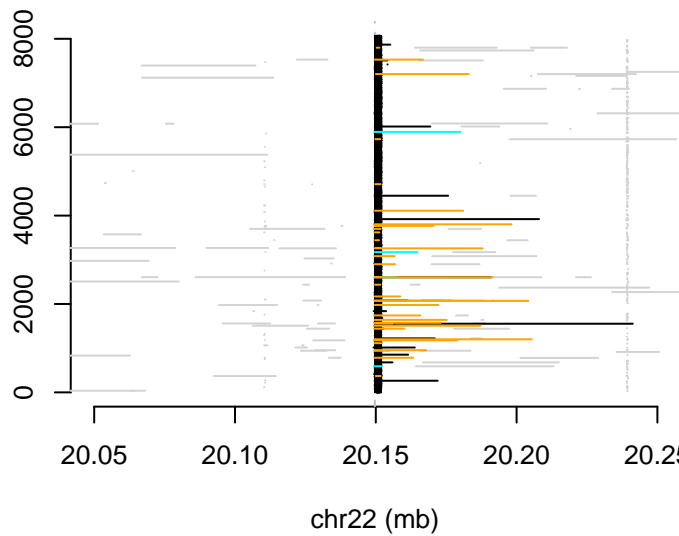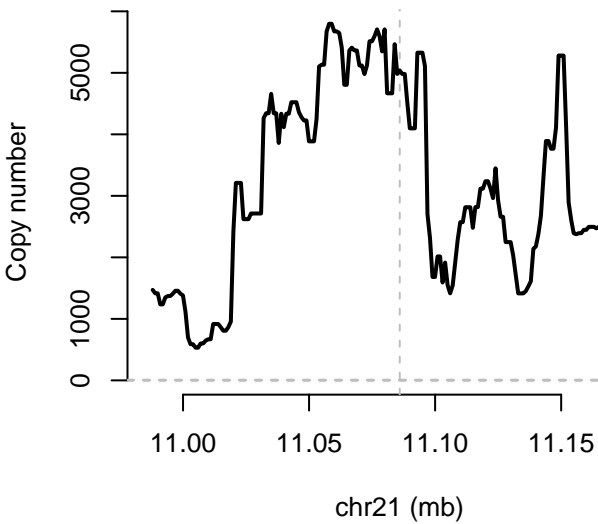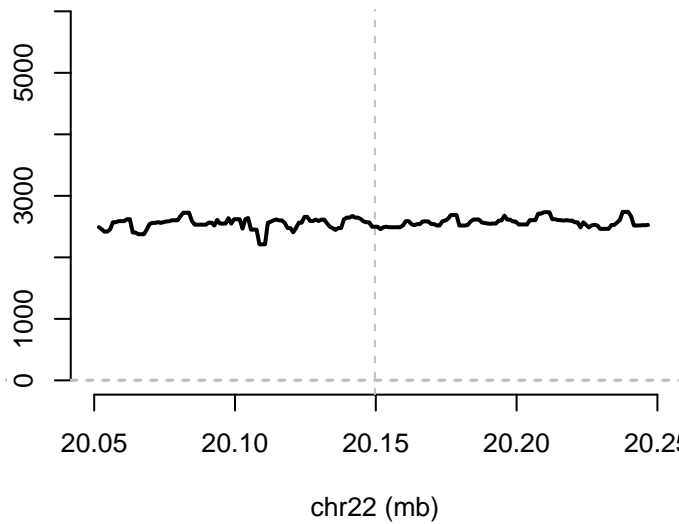

K562 chr22:20,149,671::chr21:11,085,968-+

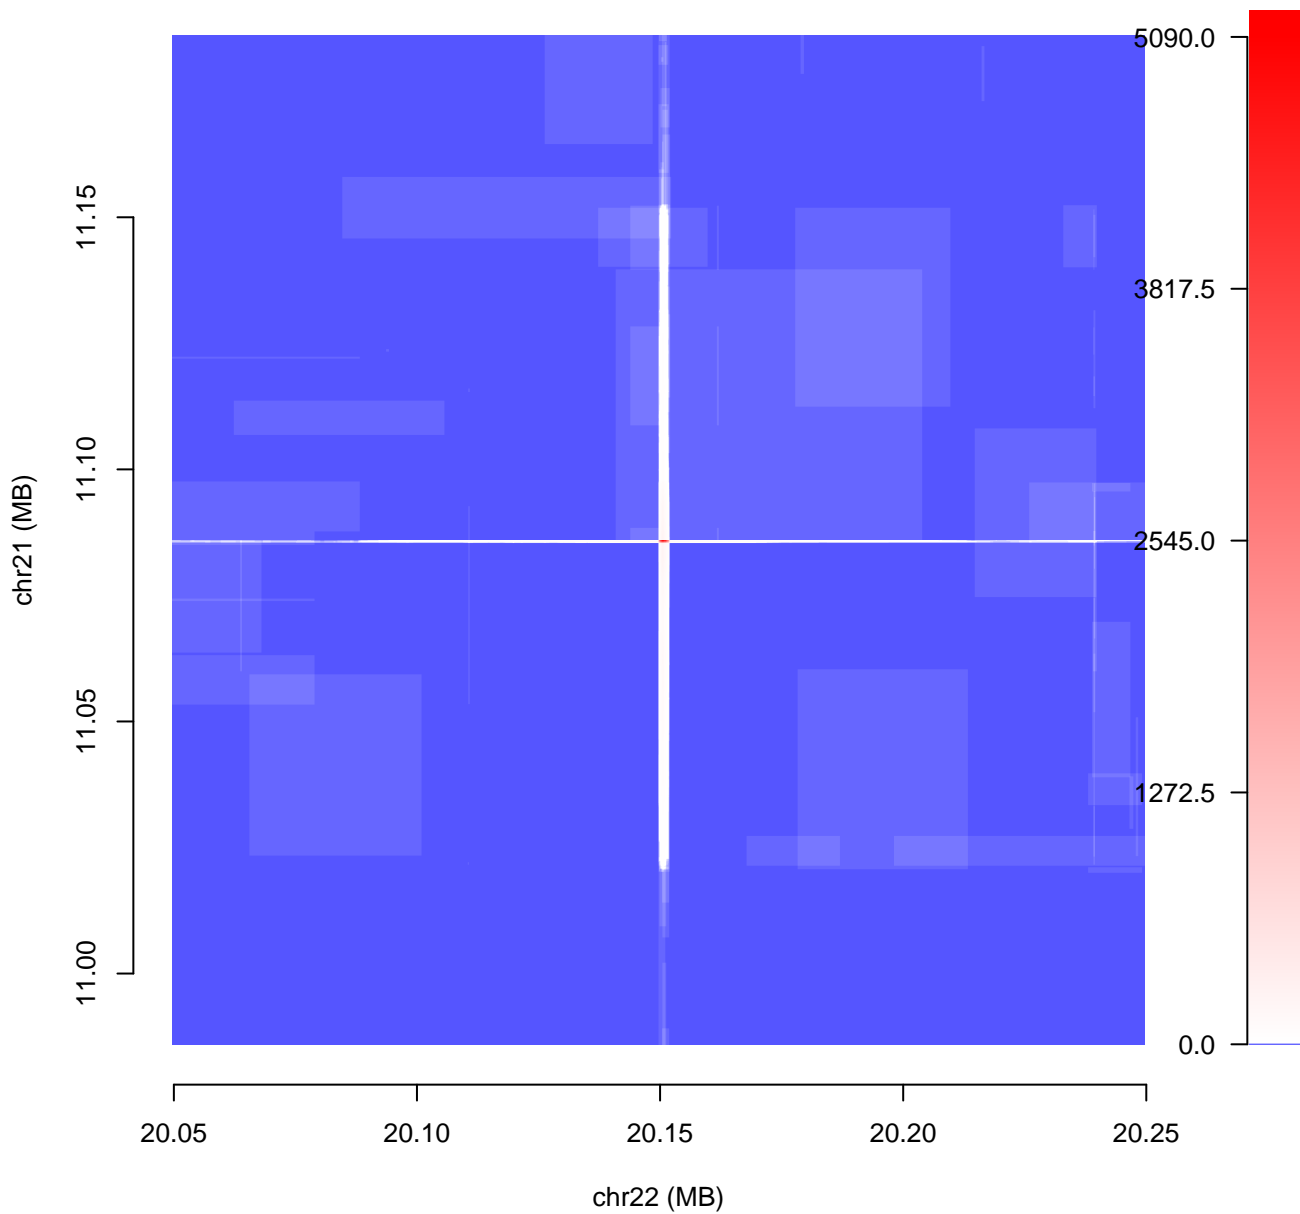

Supplement: Supplemental_Data.zip [file event_18.pdf › event_18.pdf]

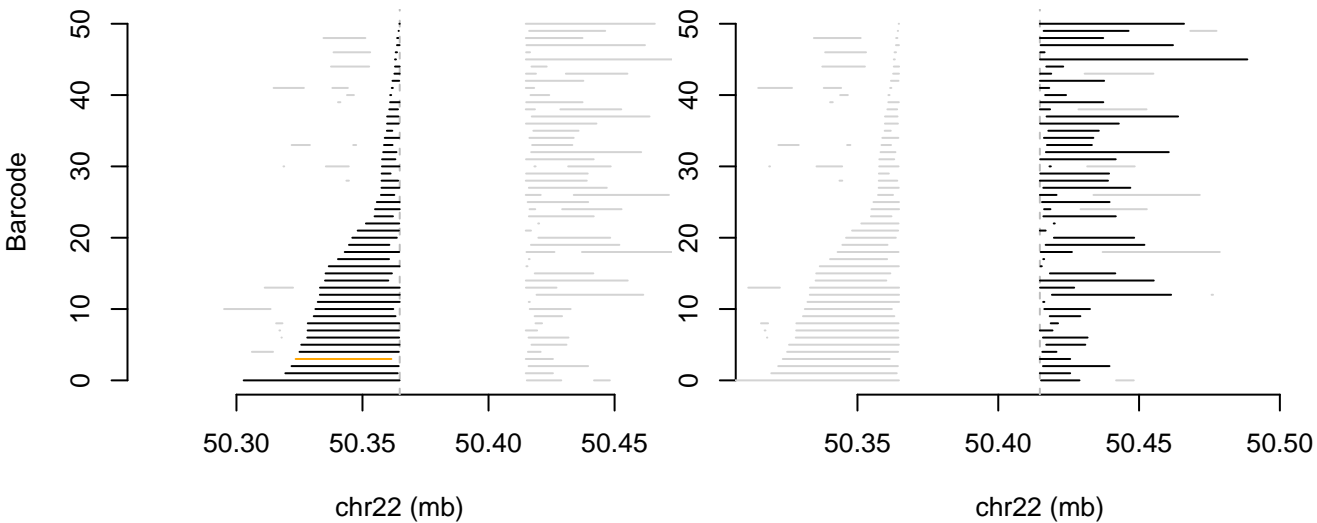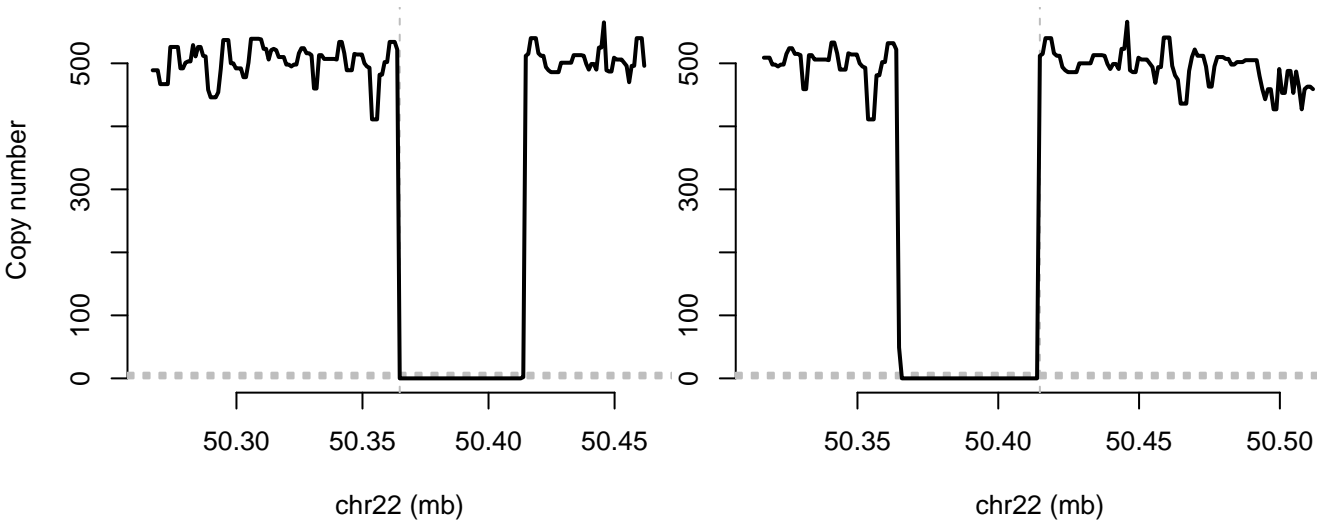

K562 chr22:50,414,776::chr22:50,364,777-+

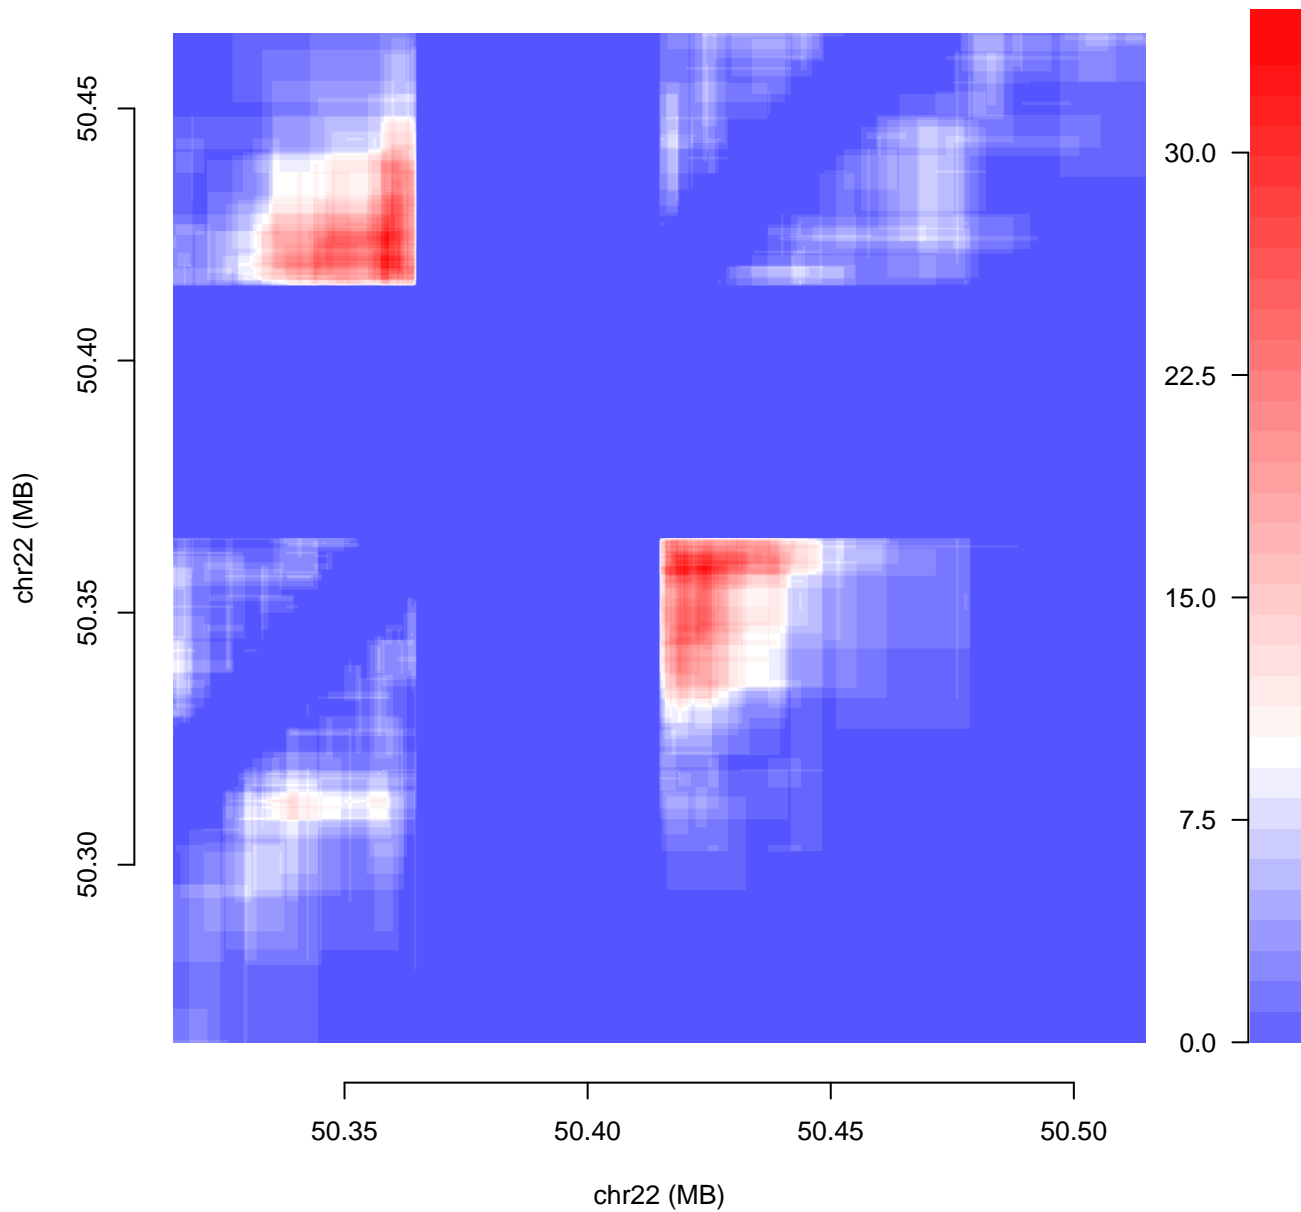

Supplement: Supplemental_Data.zip [file event_180.pdf › event_180.pdf]

Barcode

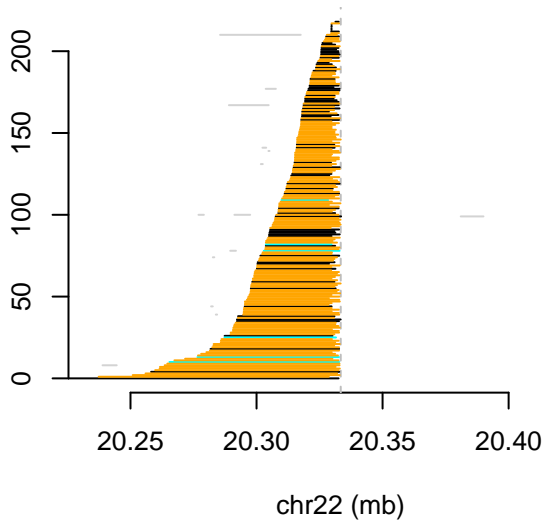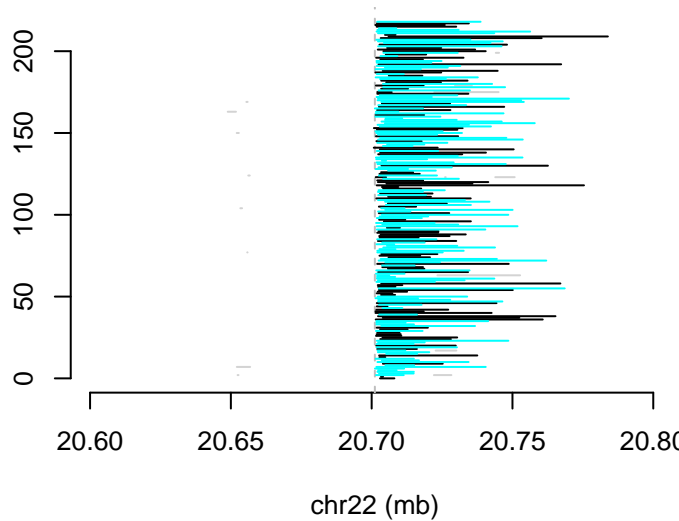

Copy number

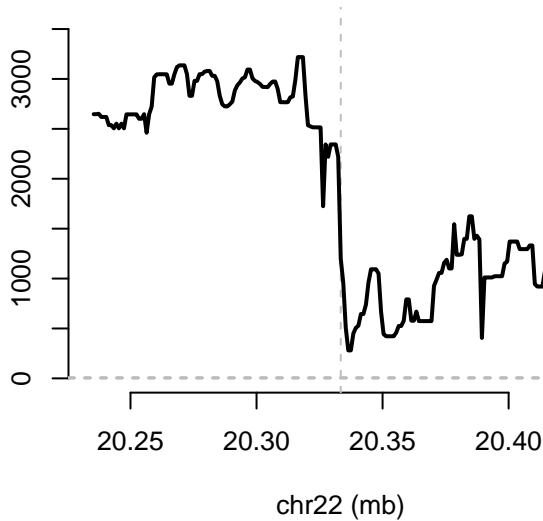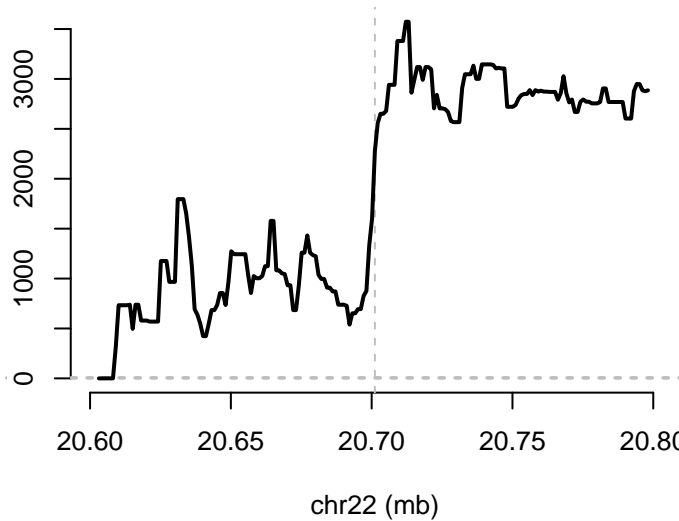

K562 chr22:20,701,137::chr22:20,333,403-+

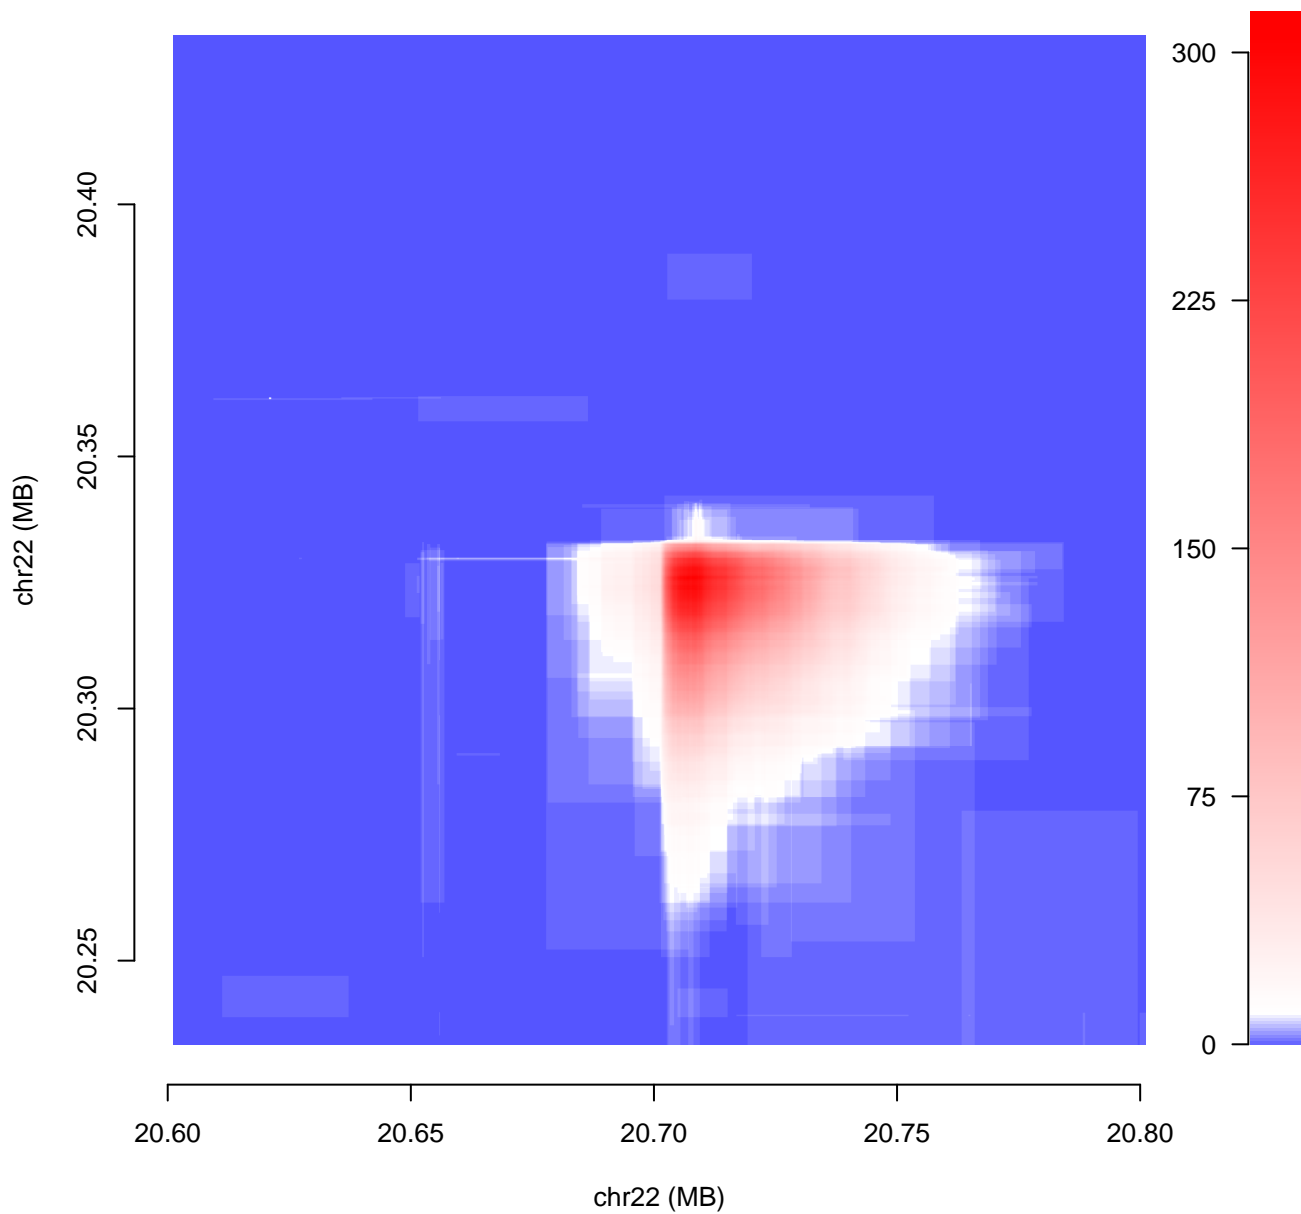

Supplement: Supplemental_Data.zip [file event_181.pdf › event_181.pdf]

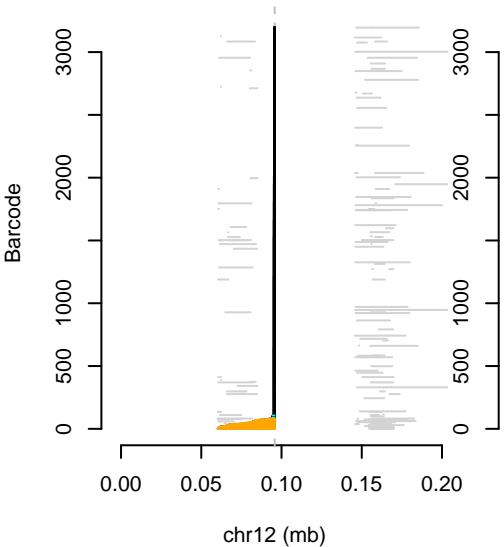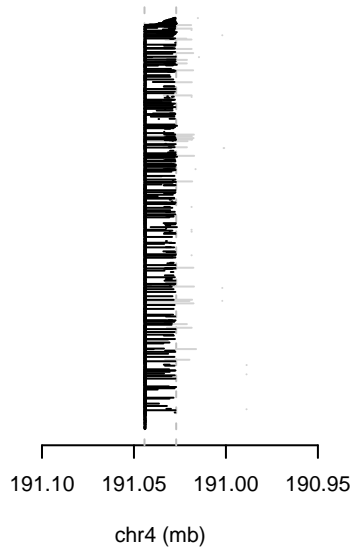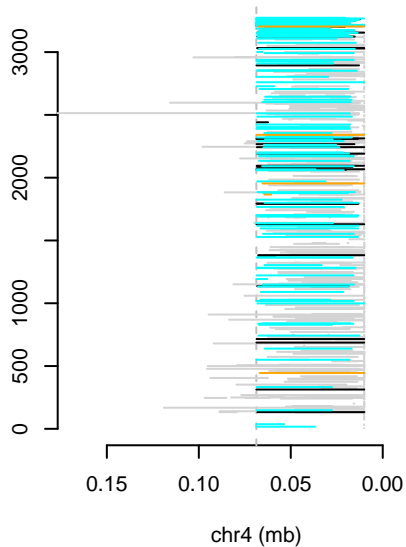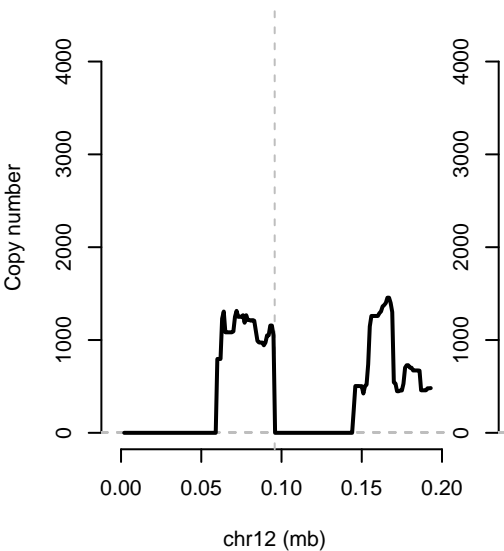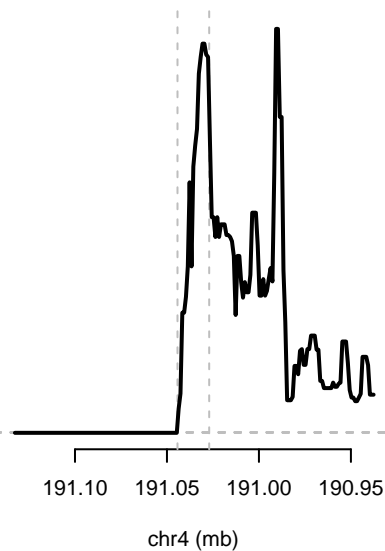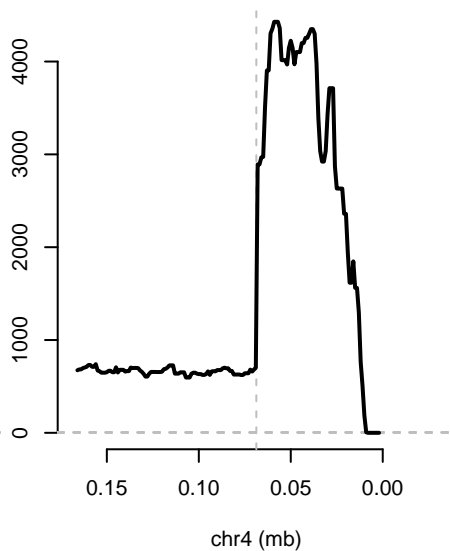

K562 chr4:191,044,280::chr12:95,744++

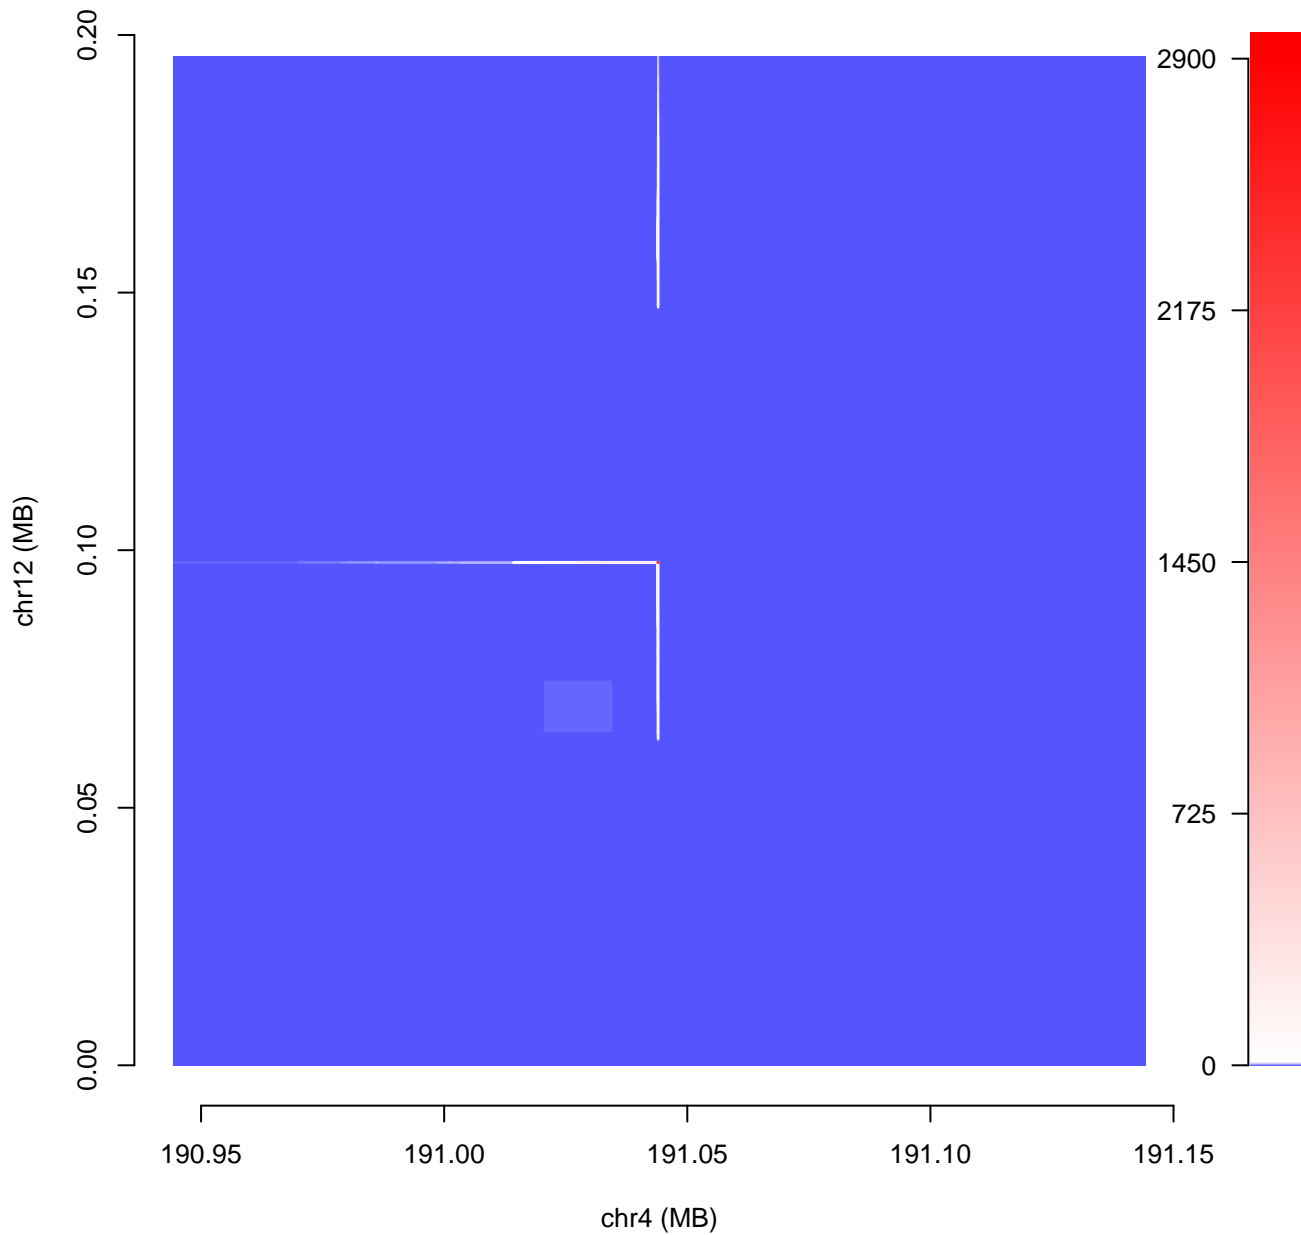

K562 chr4:191,044,280::chr4:191,027,032+-

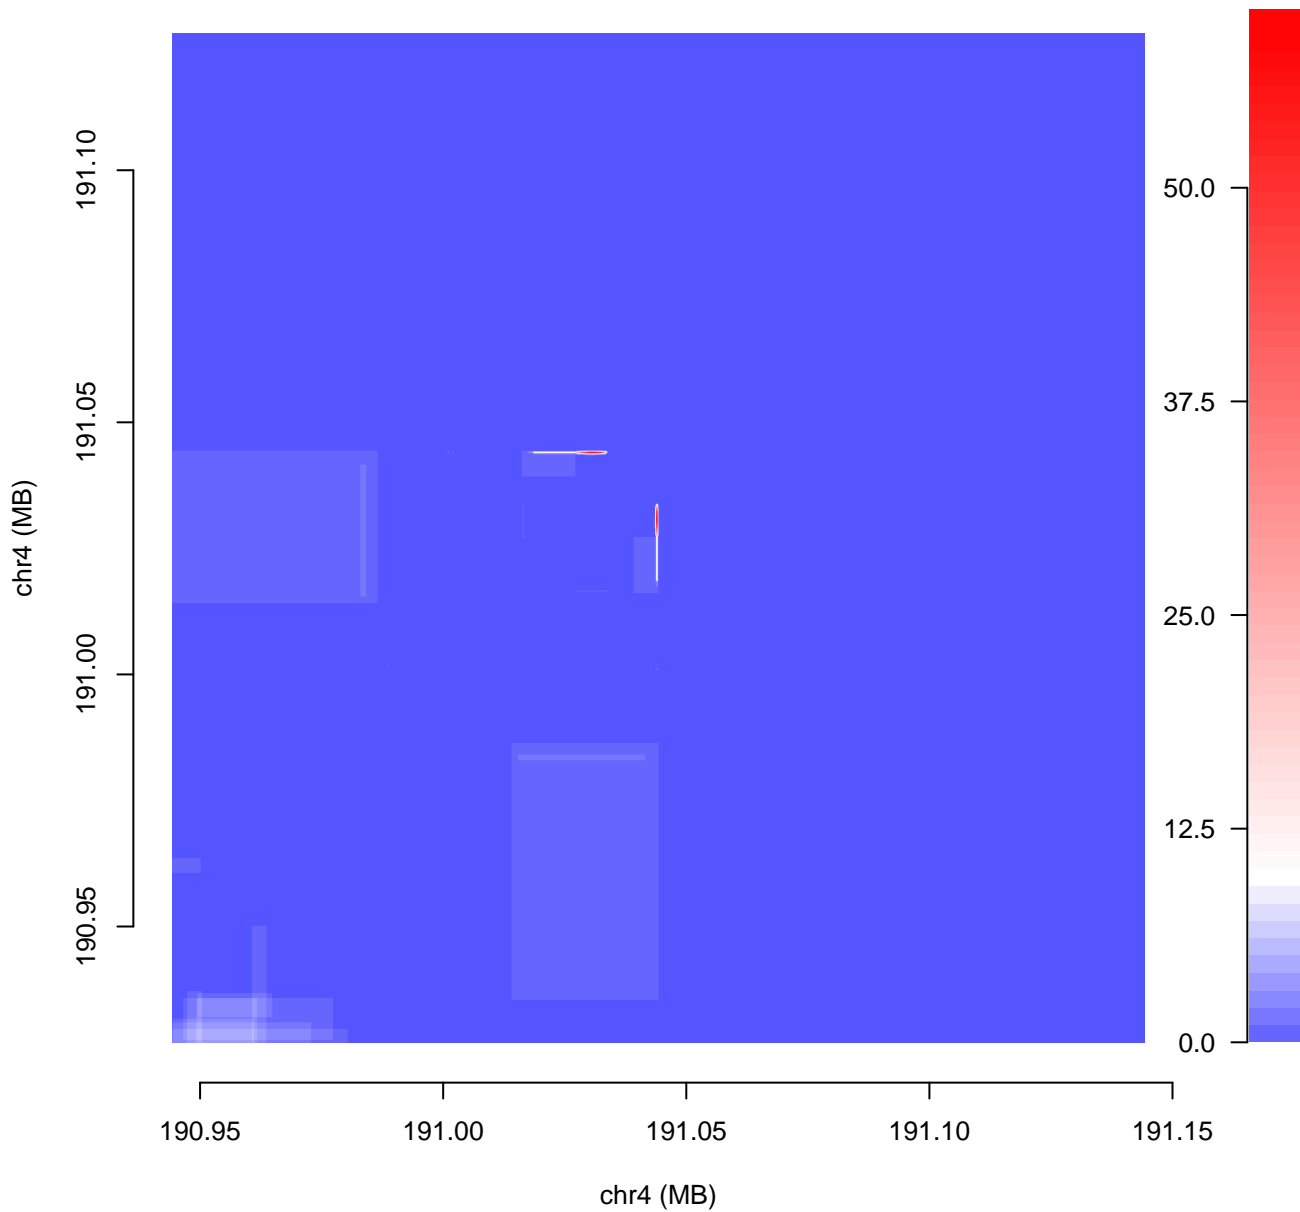

K562 chr4:68,717::chr4:191,027,032+-

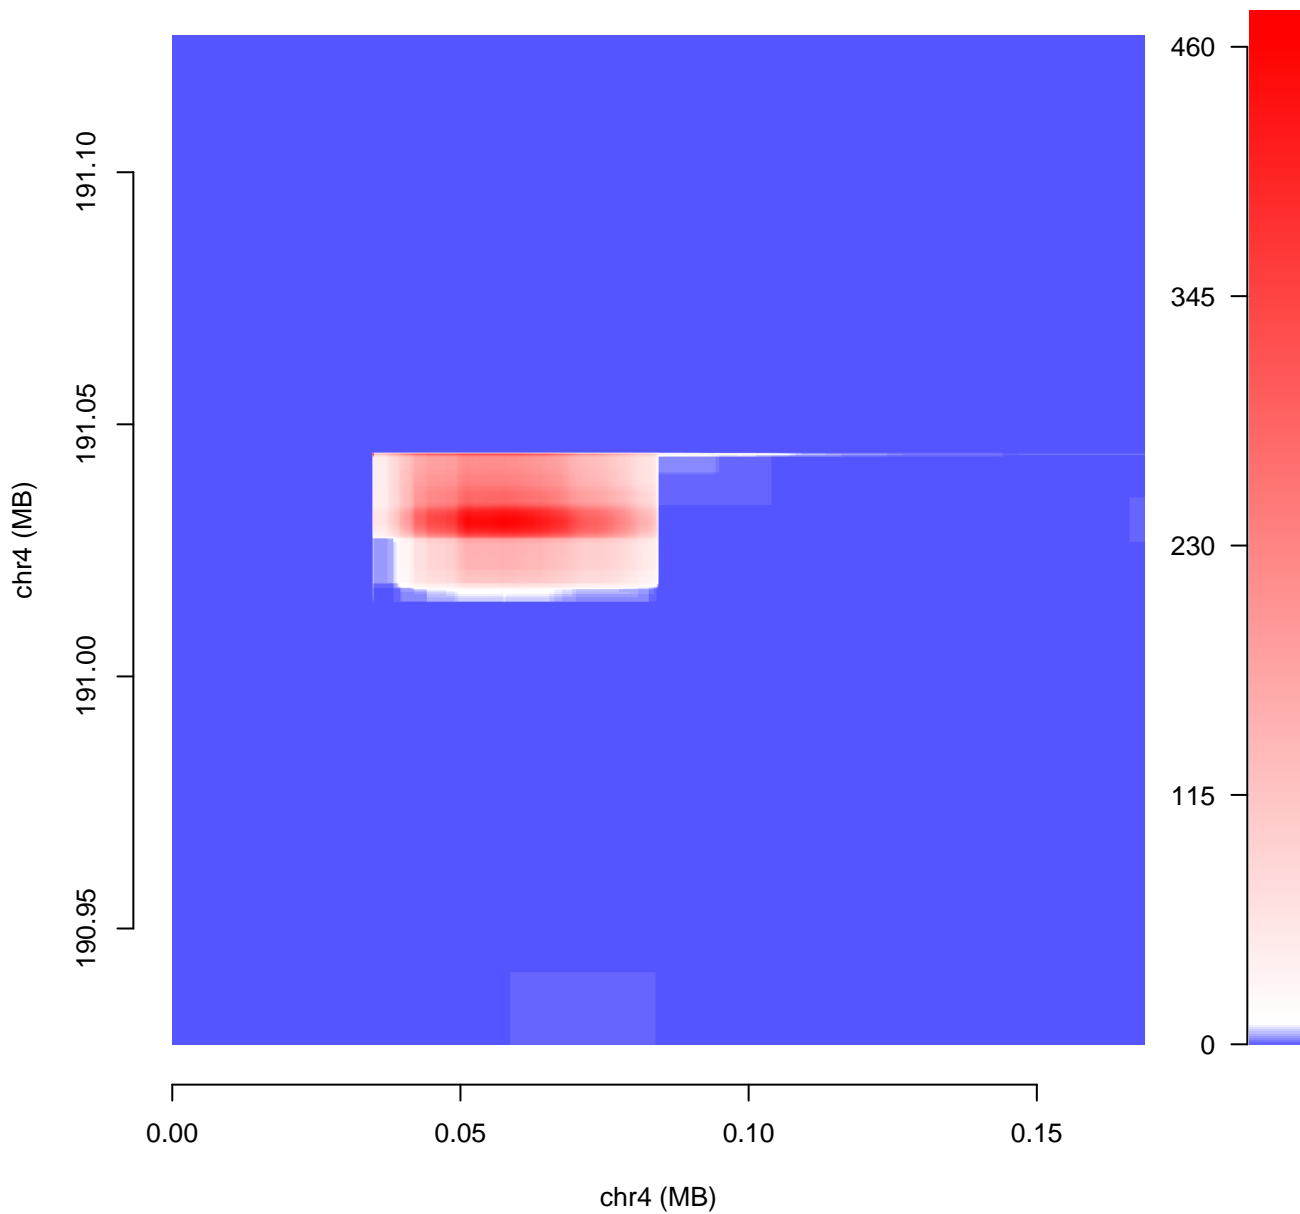

Supplement: Supplemental_Data.zip [file event_182.pdf › event_182.pdf]

Barcode

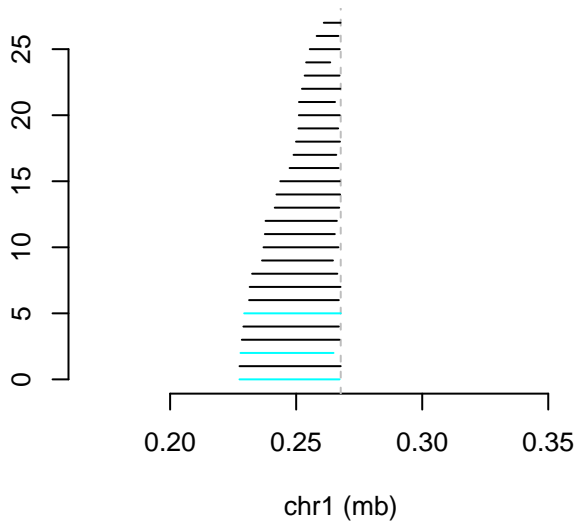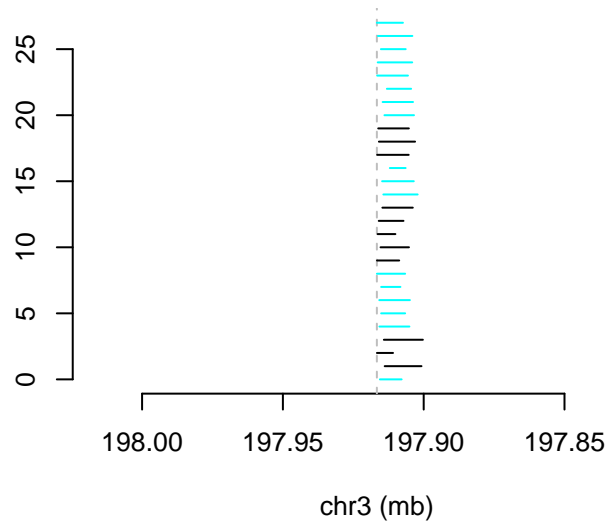

Copy number

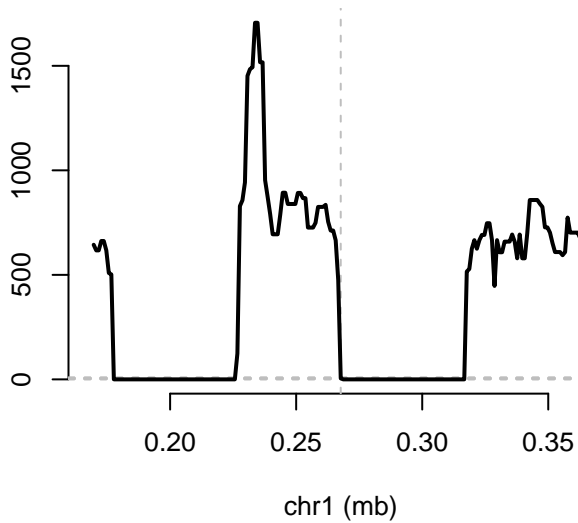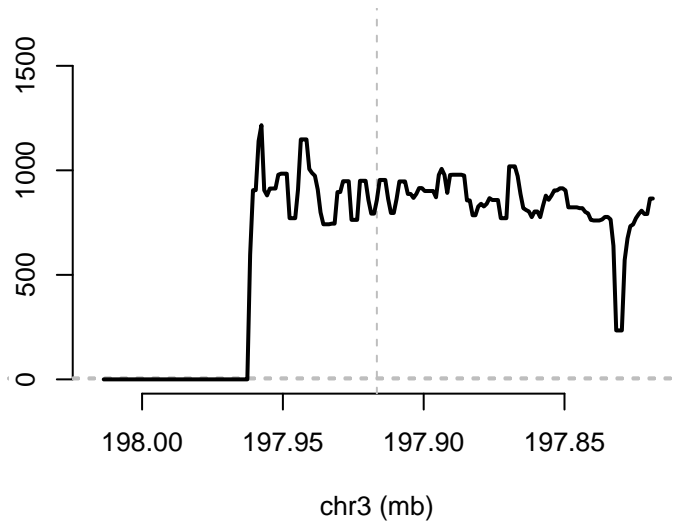

K562 chr1:267,682::chr3:197,916,627++

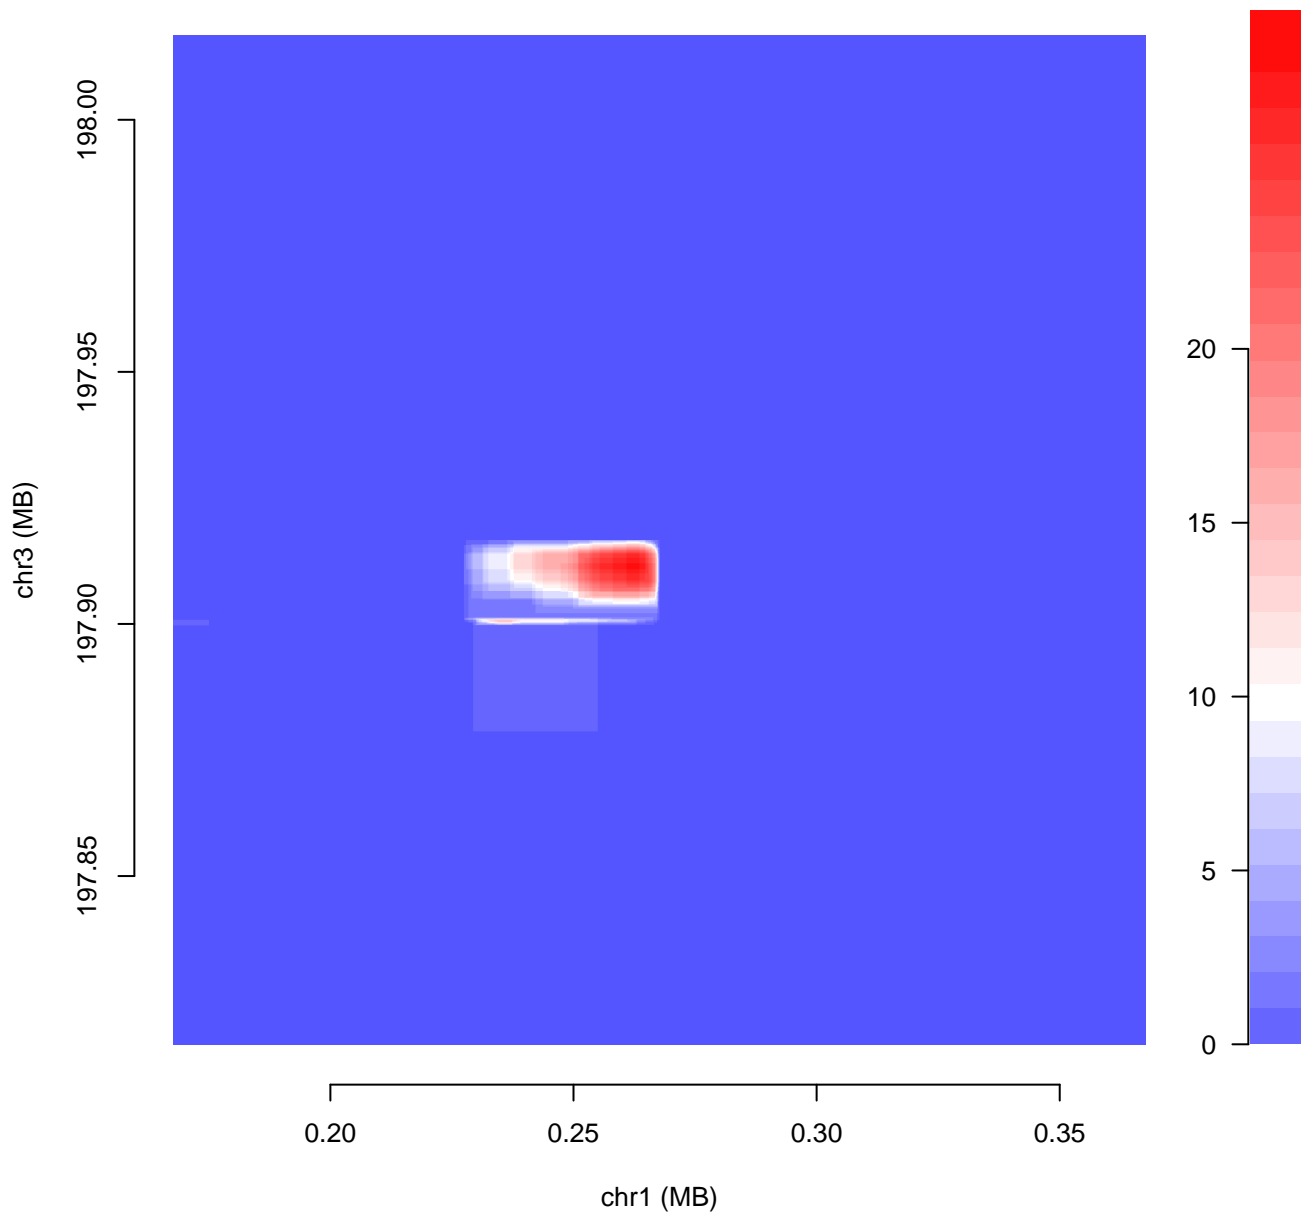

Supplement: Supplemental_Data.zip [file event_183.pdf › event_183.pdf]

Barcode

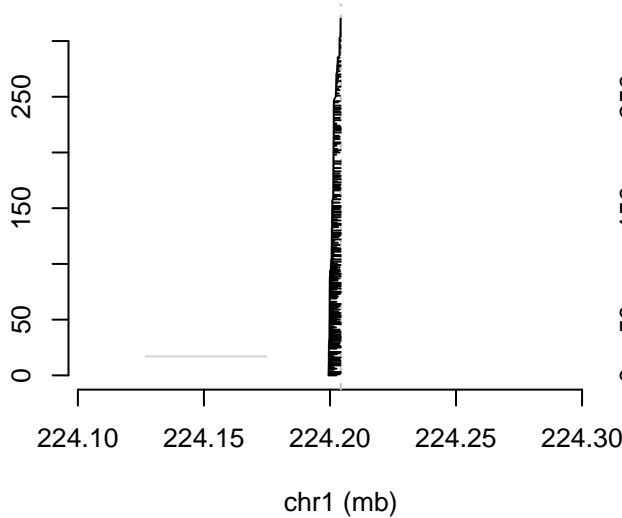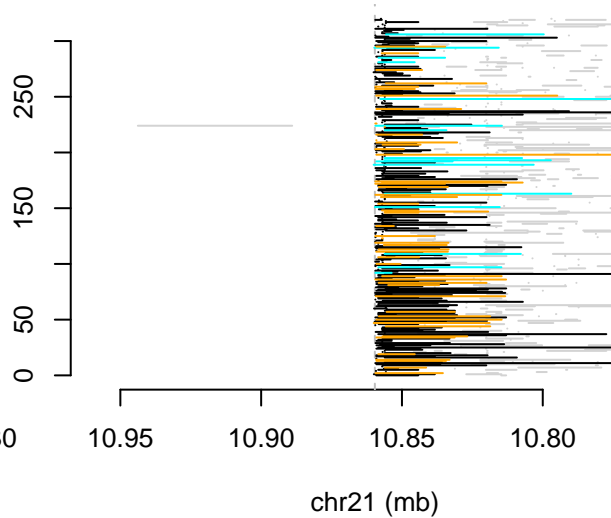

Copy number

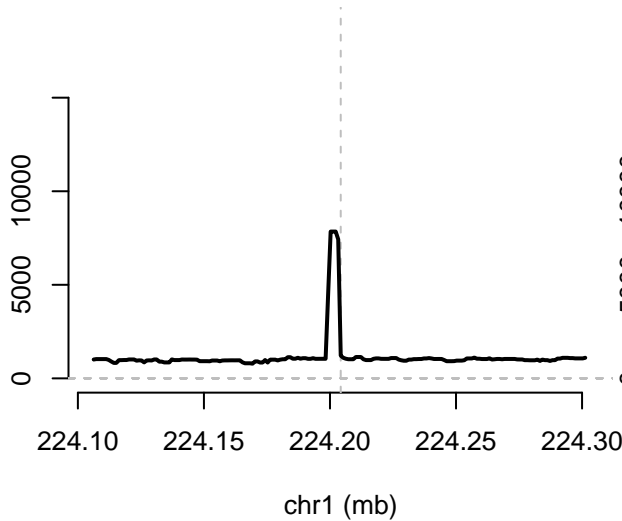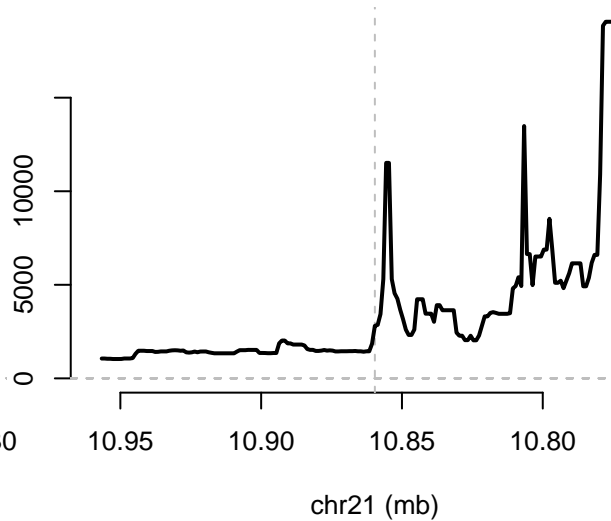

K562 chr21:10,859,623::chr1:224,204,272++

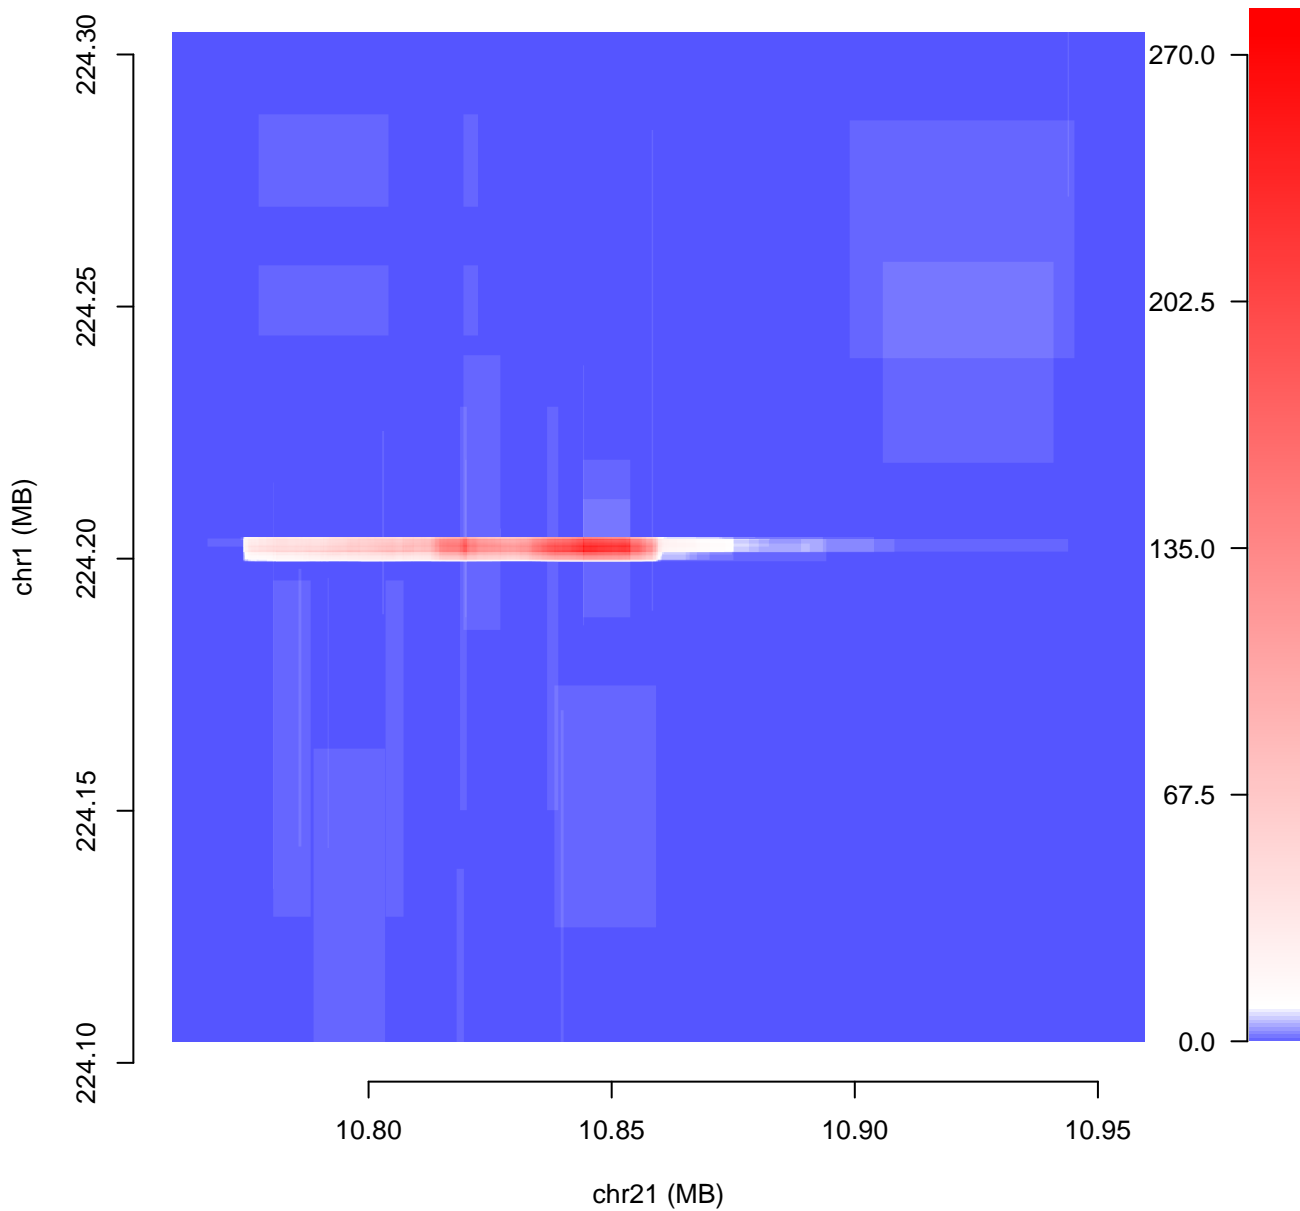

Supplement: Supplemental_Data.zip [file event_184.pdf › event_184.pdf]

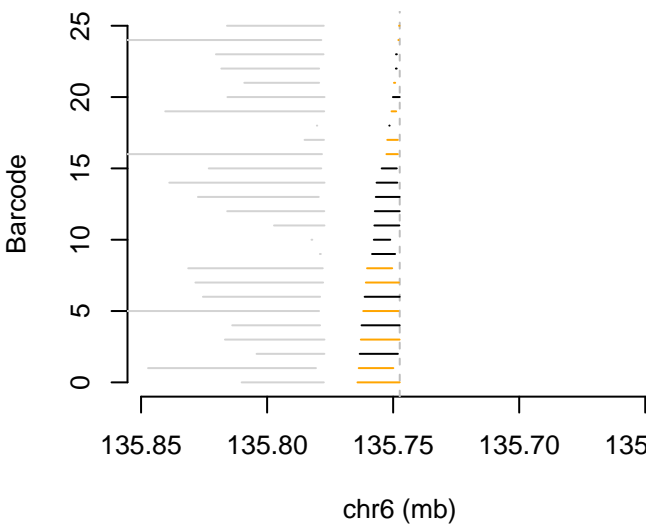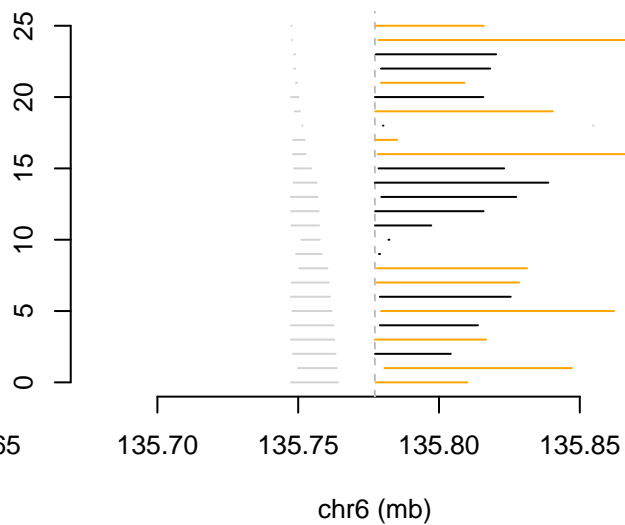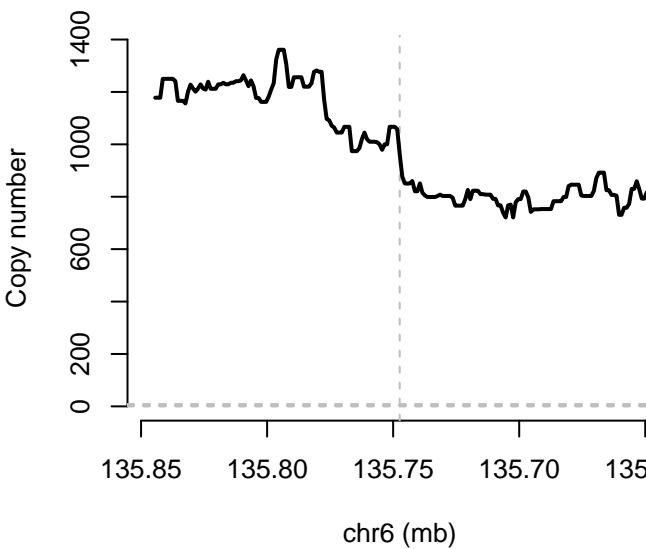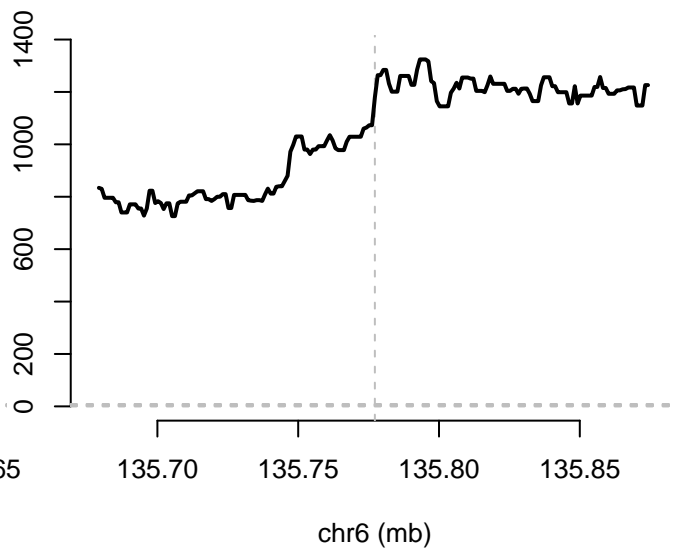

K562 chr6:135,747,388::chr6:135,777,223--

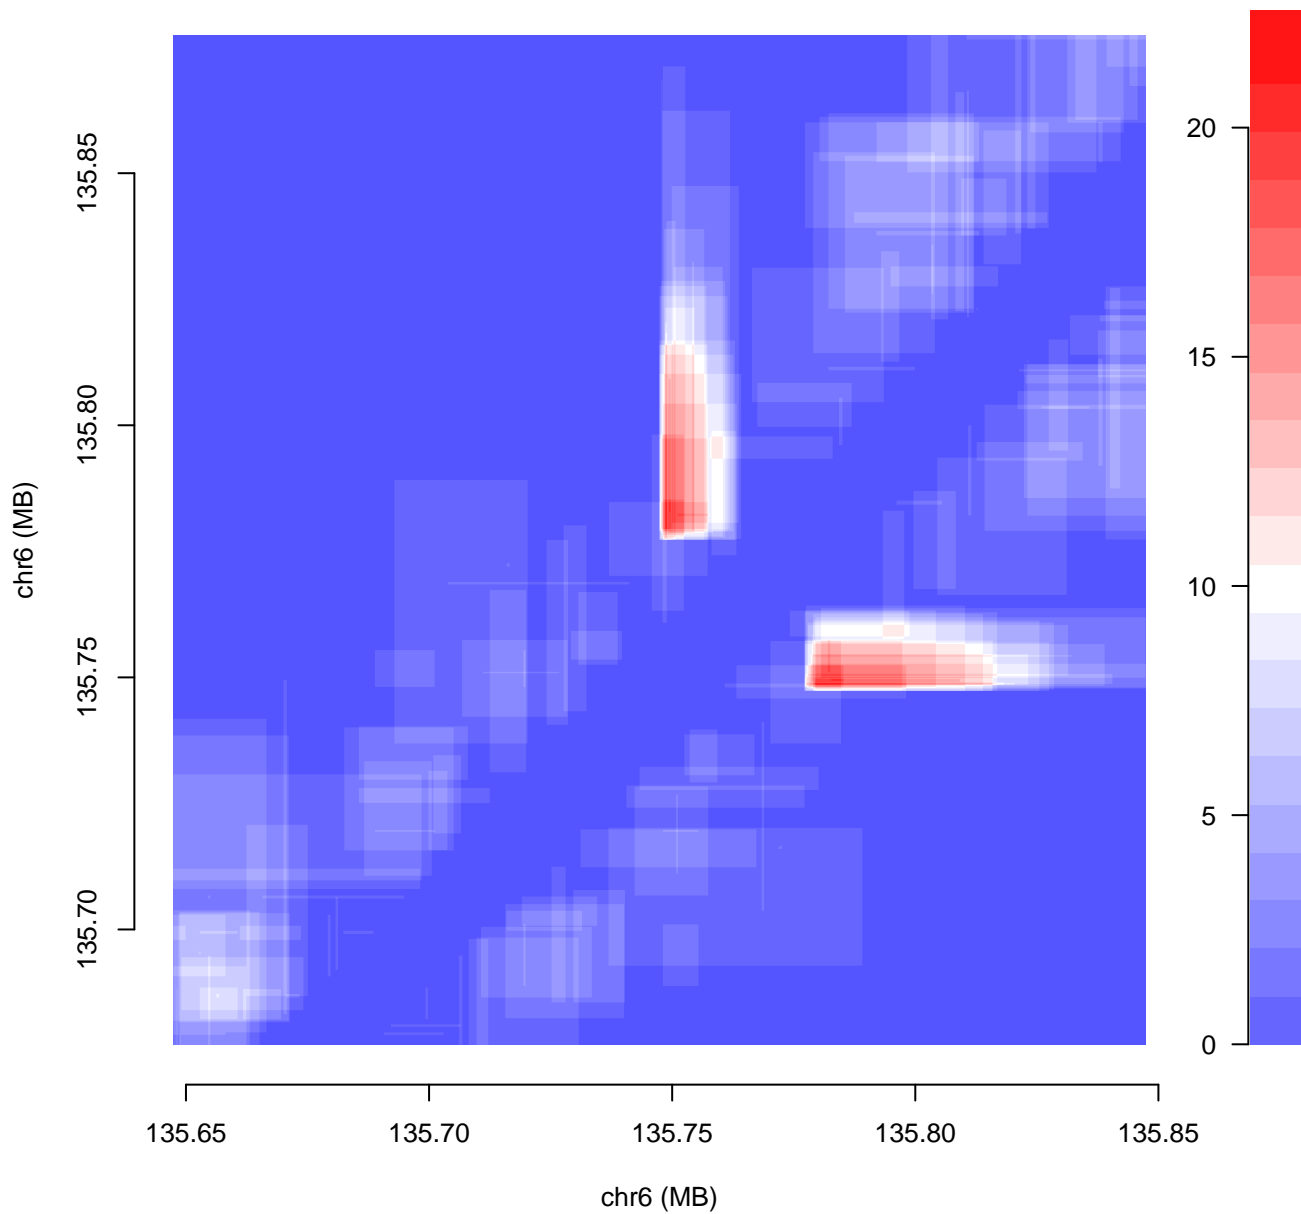

Supplement: Supplemental_Data.zip [file event_185.pdf › event_185.pdf]

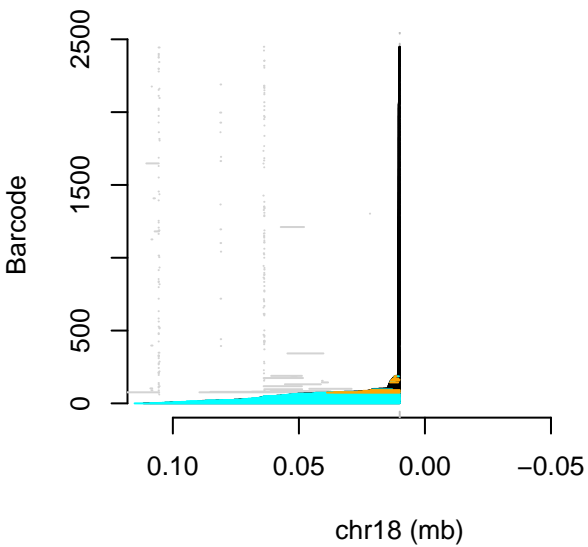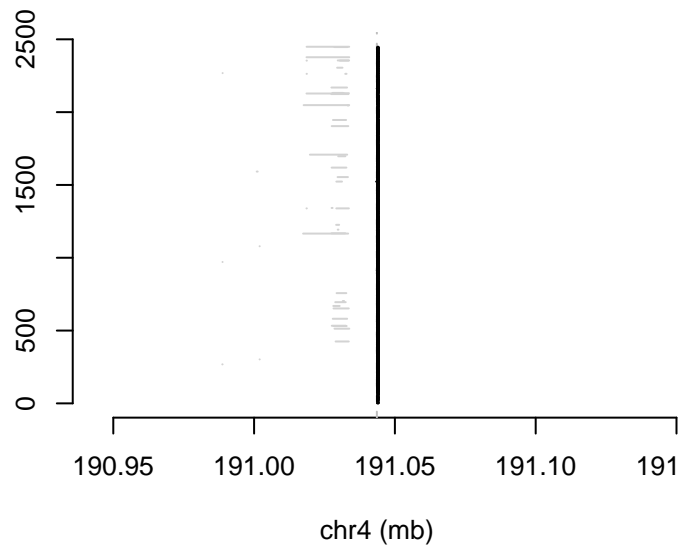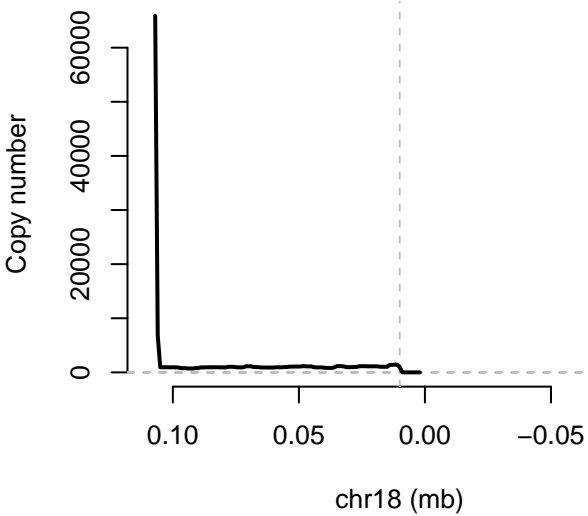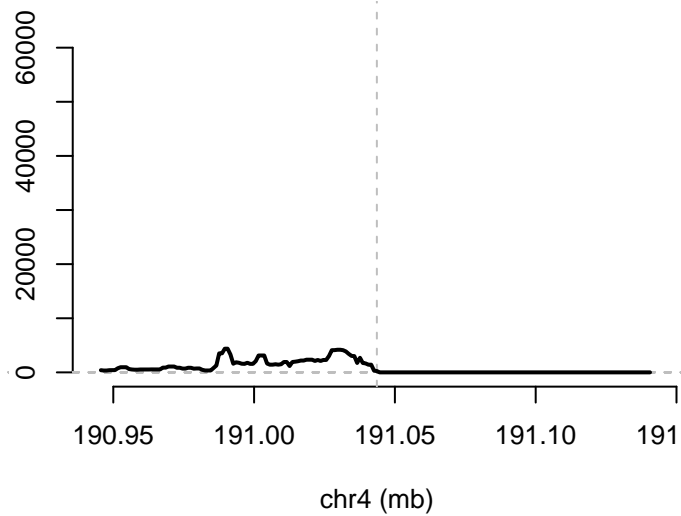

K562 chr4:191,043,598::chr18:9,996--

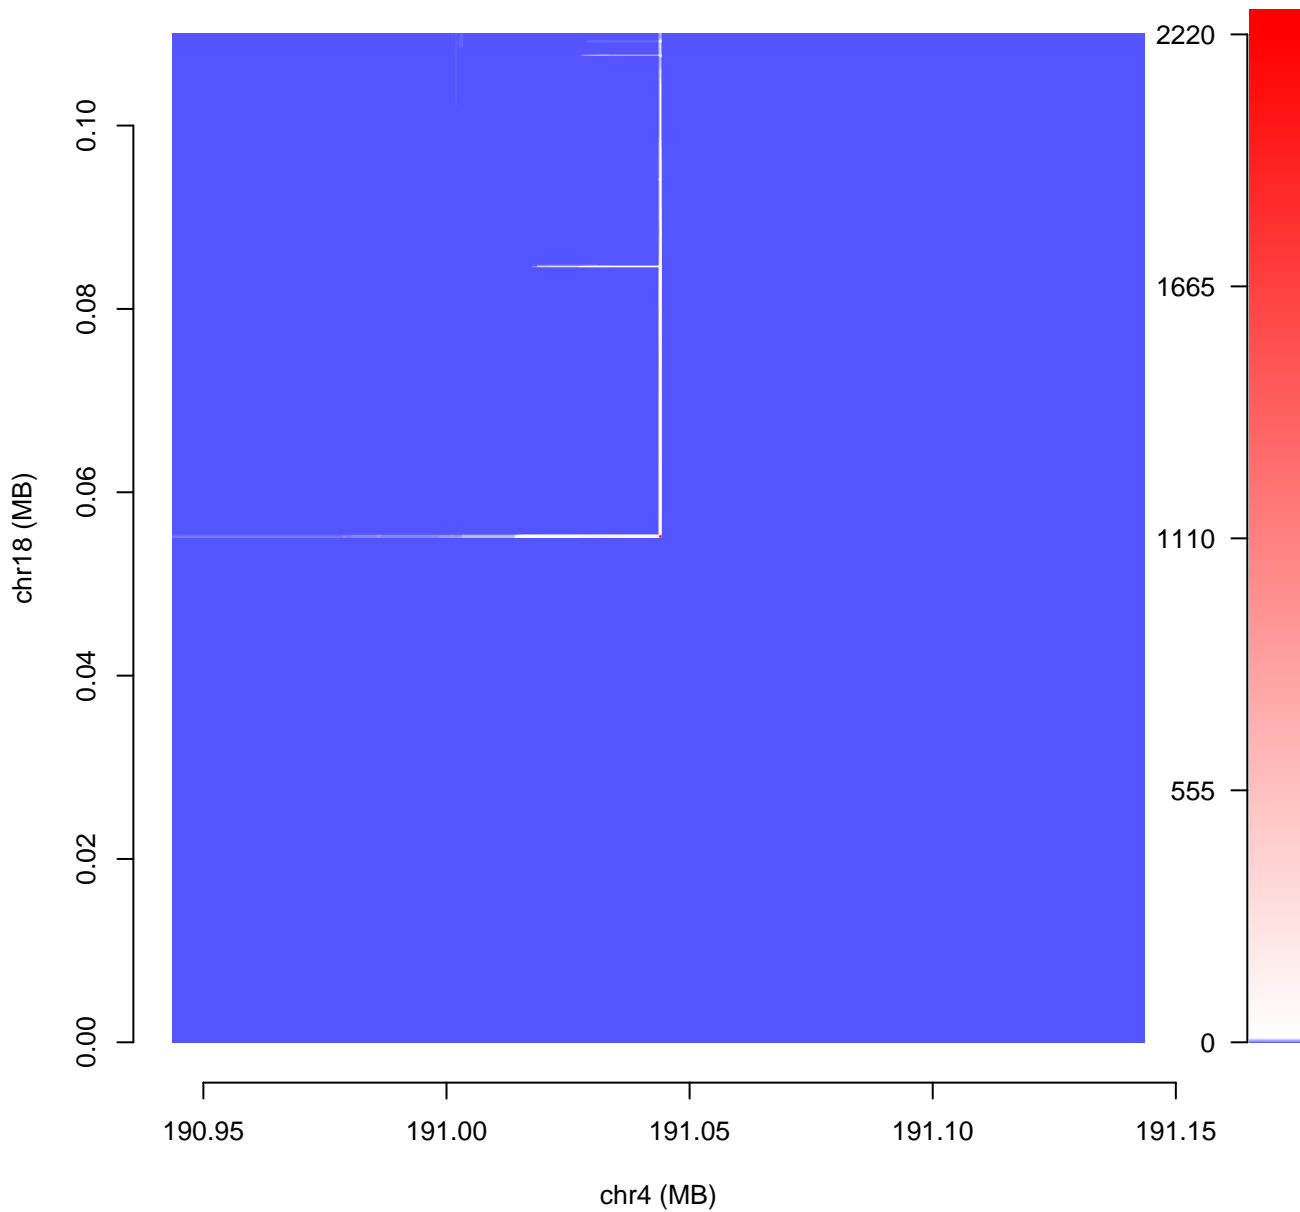

Supplement: Supplemental_Data.zip [file event_186.pdf › event_186.pdf]

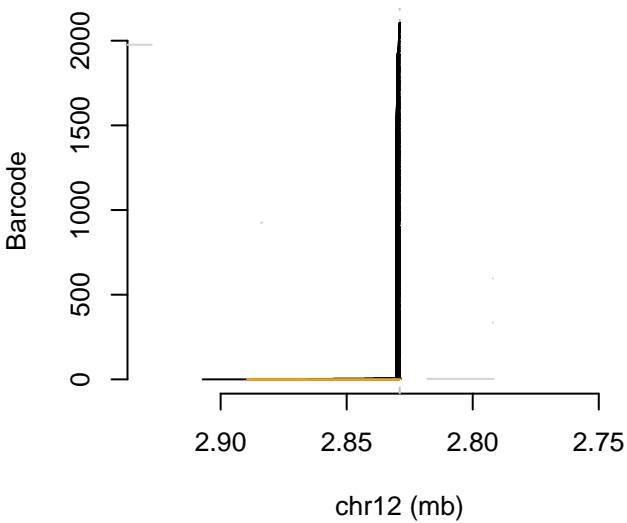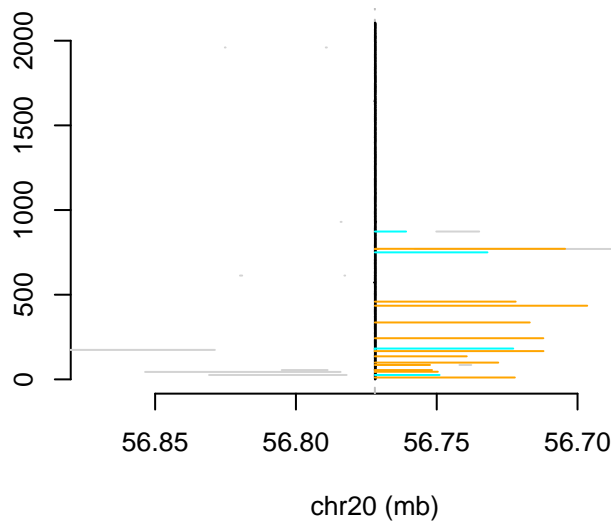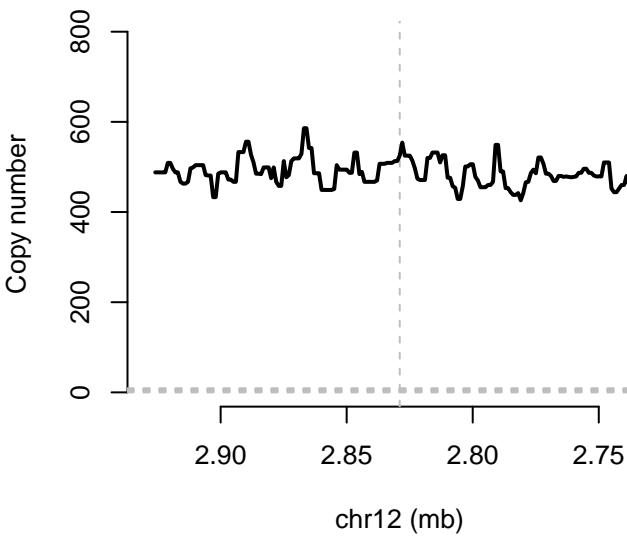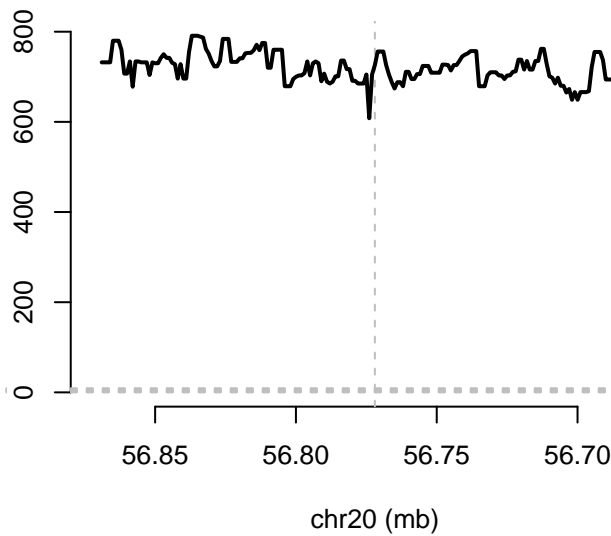

K562 chr12:2,828,948::chr20:56,771,964-+

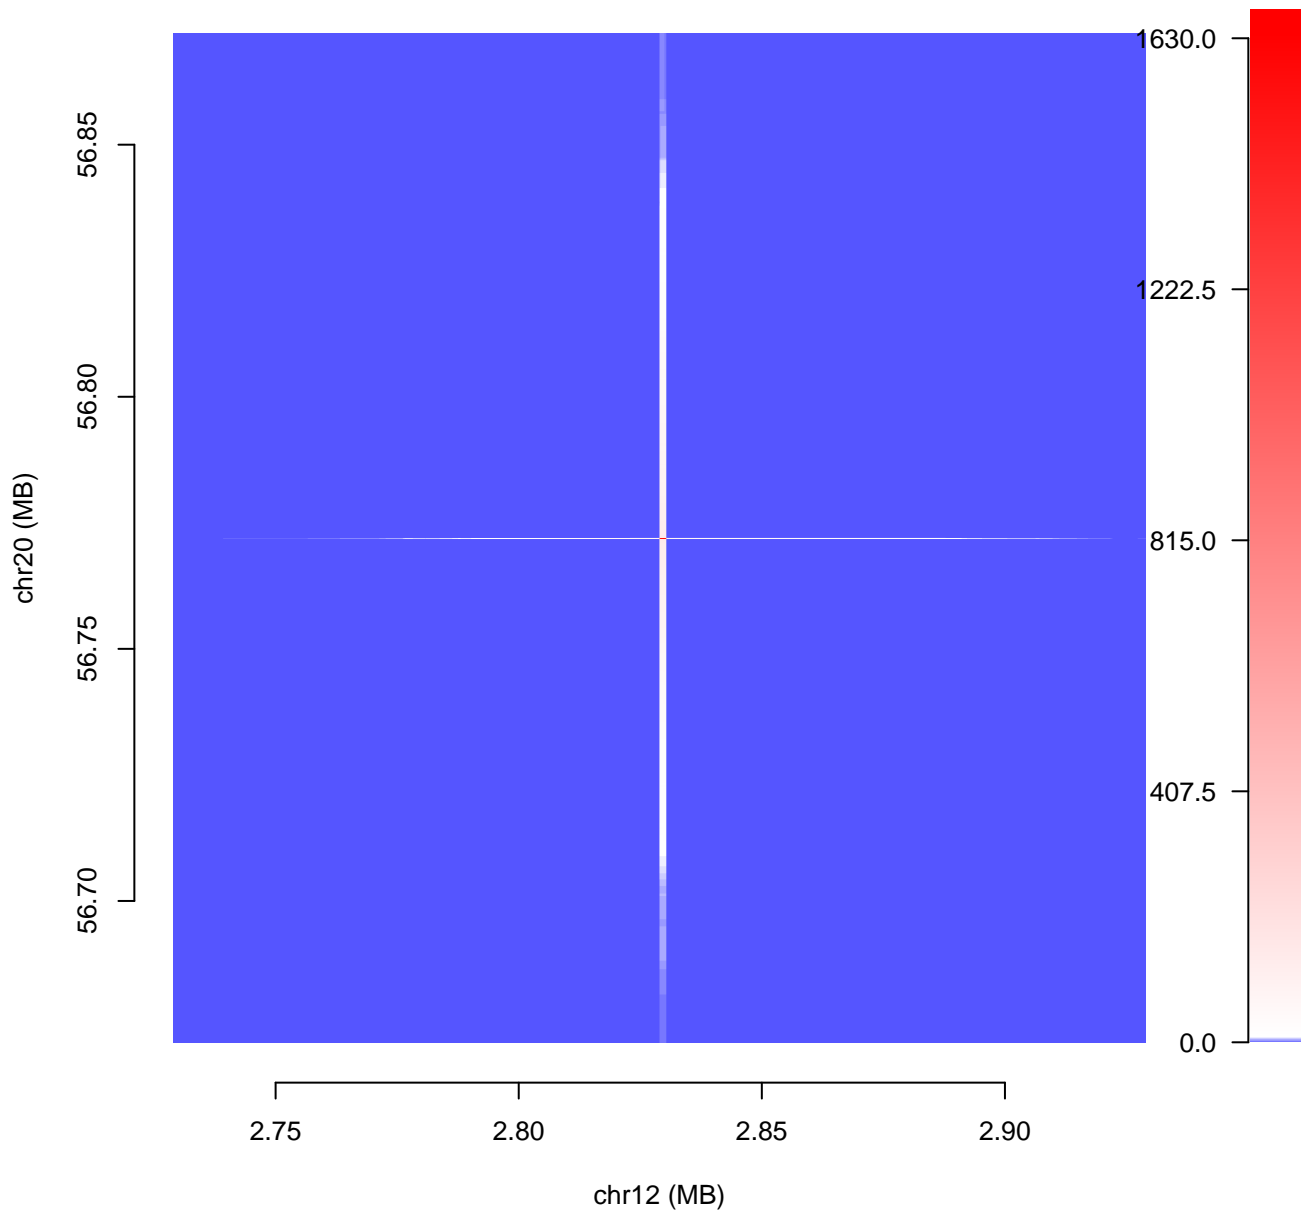

Supplement: Supplemental_Data.zip [file event_187.pdf › event_187.pdf]

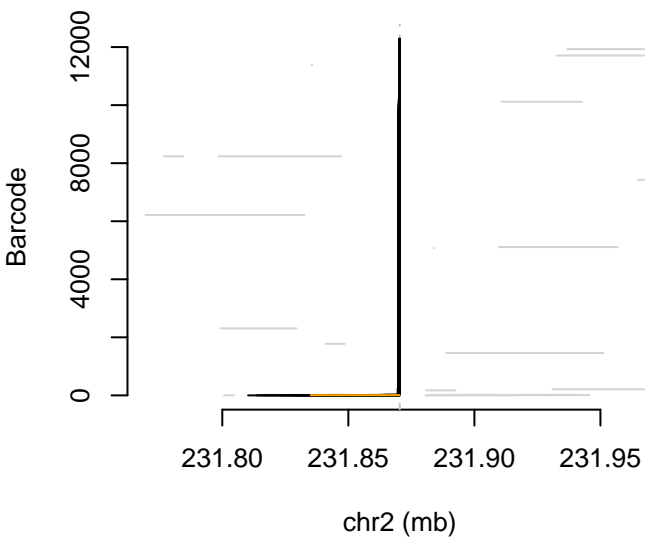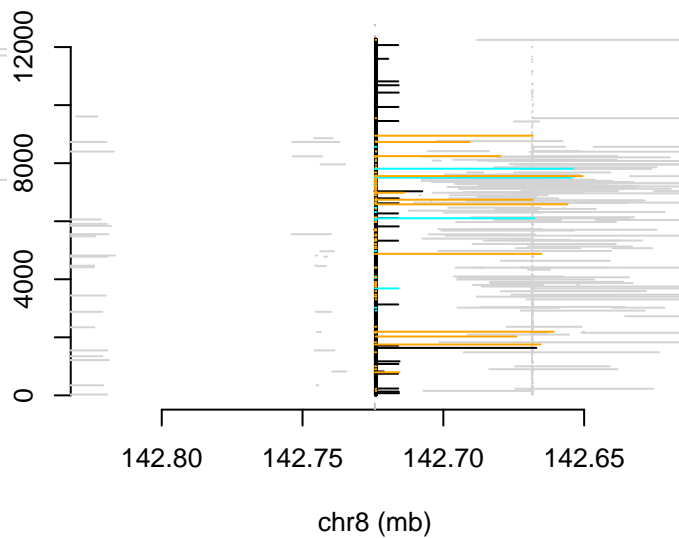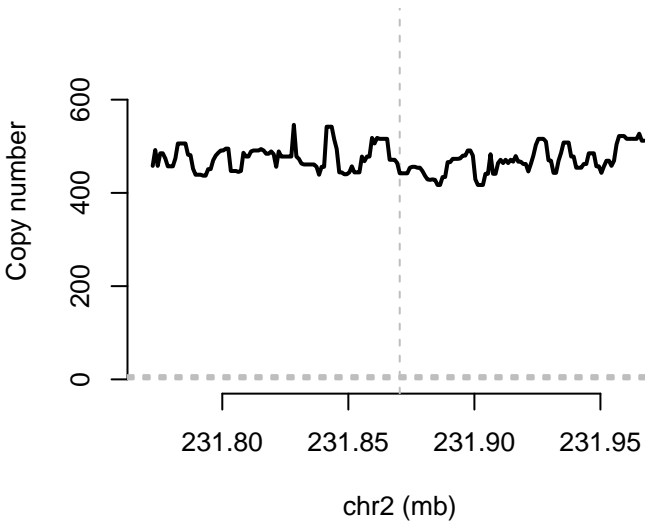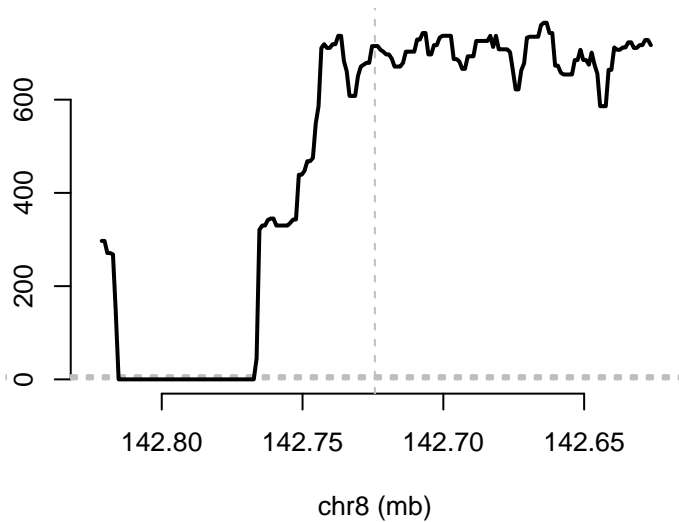

K562 chr2:231,870,387::chr8:142,724,314++

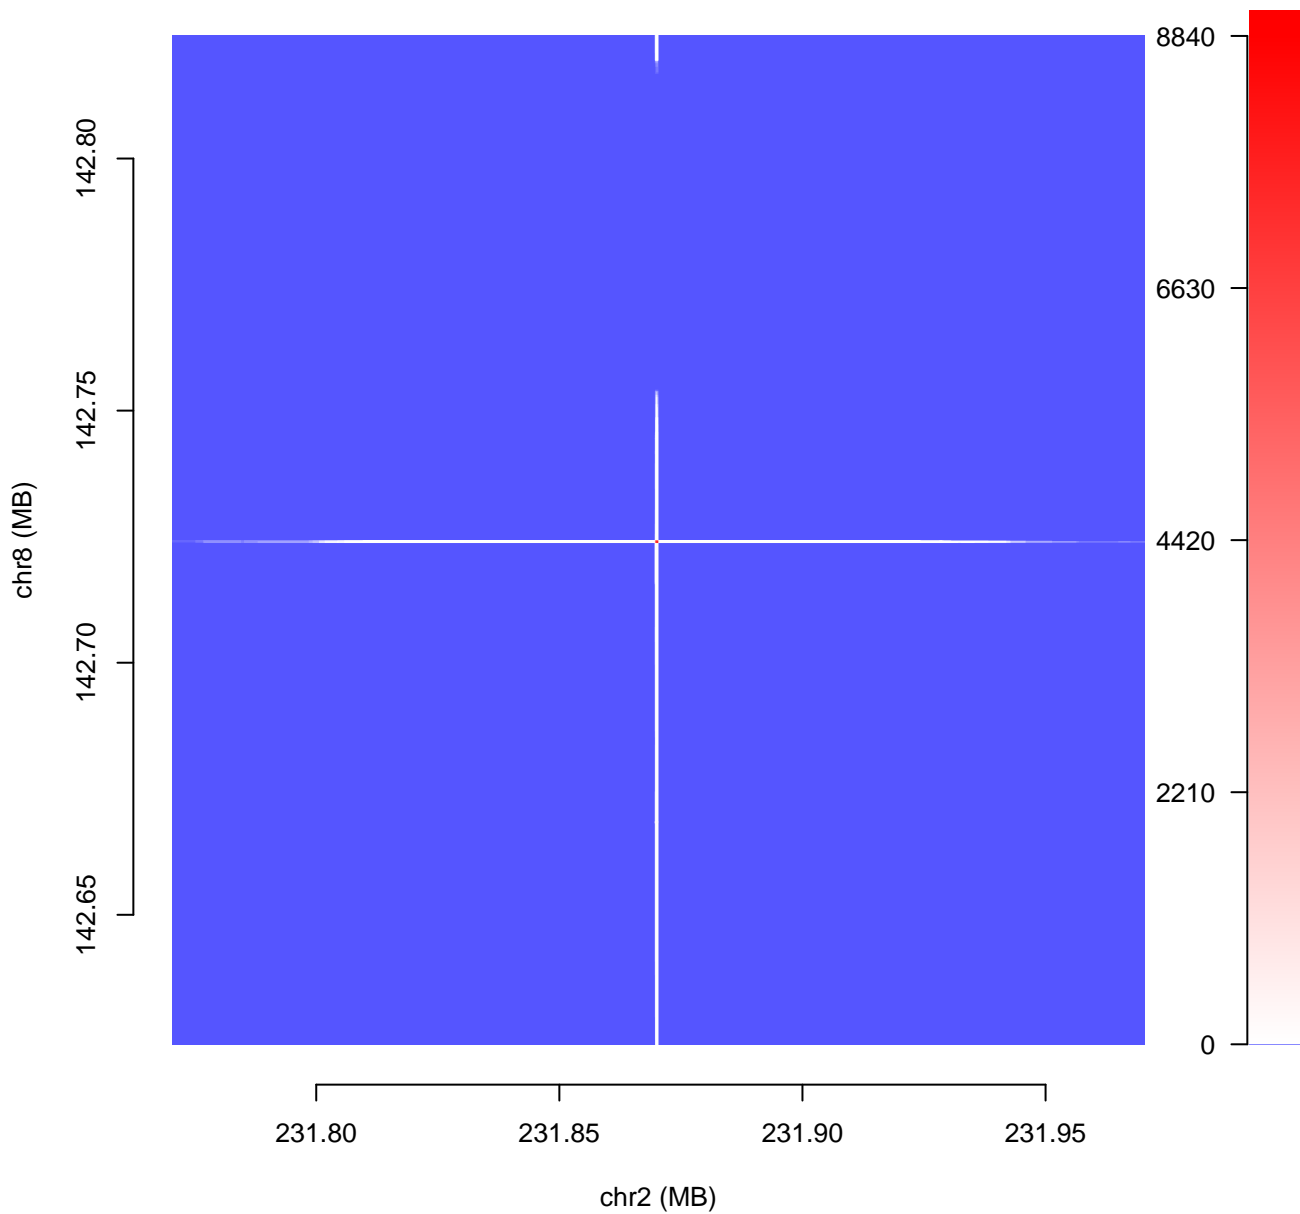

Supplement: Supplemental_Data.zip [file event_188.pdf › event_188.pdf]

Barcode

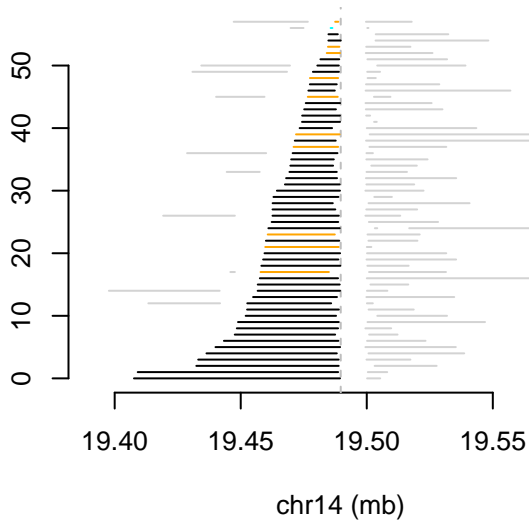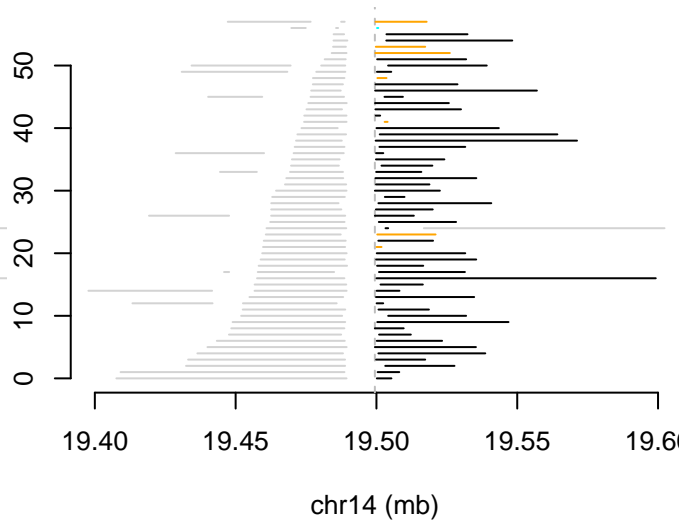

Copy number

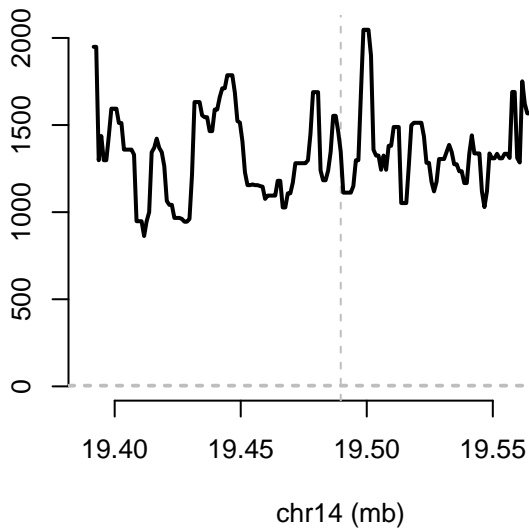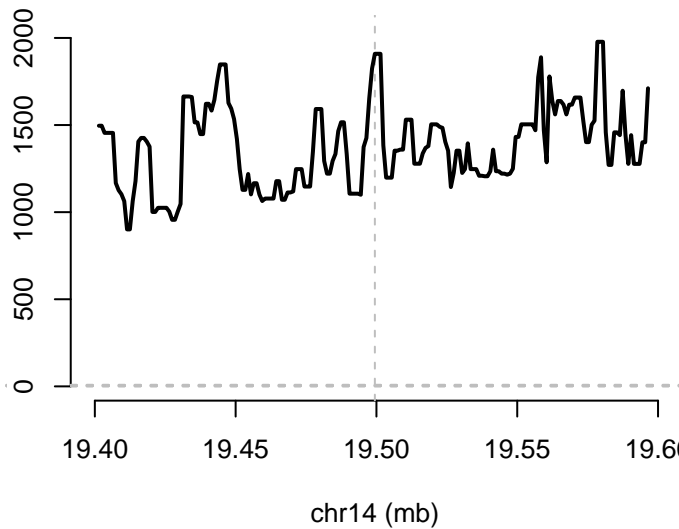

K562 chr14:19,489,678::chr14:19,499,445+-

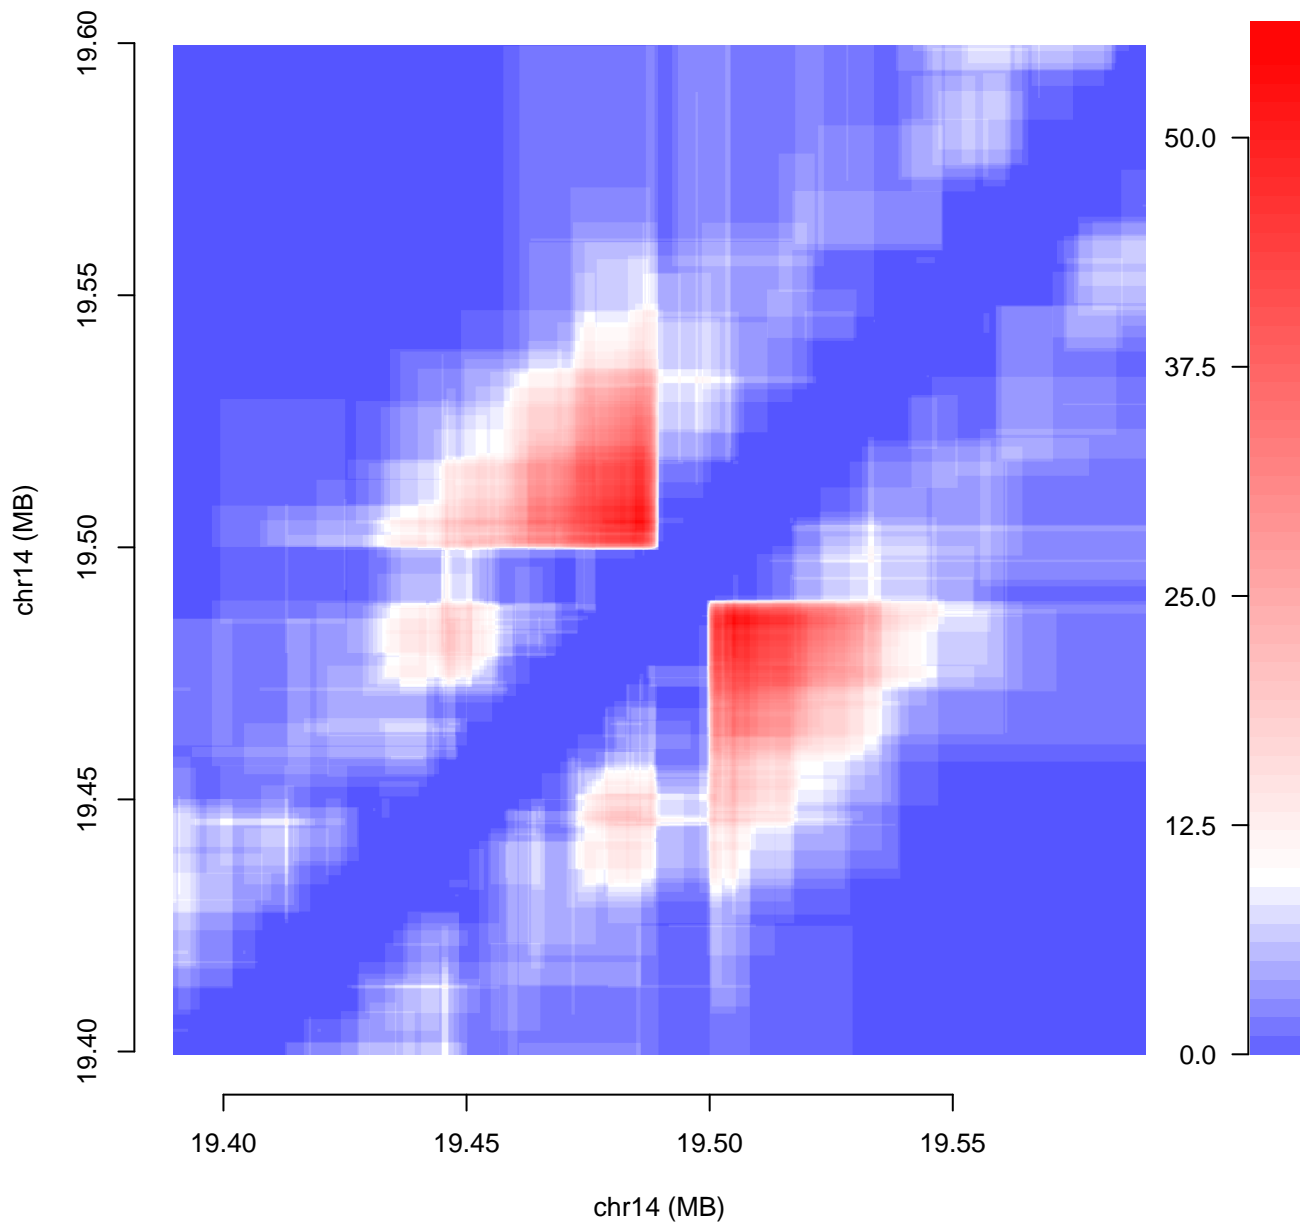

Supplement: Supplemental_Data.zip [file event_189.pdf › event_189.pdf]
