# Supplementary figures and images for: Comprehensive, integrated, and phased whole-genome analysis of the primary ENCODE cell line K562 (part 2 of 6)
Source: HighWire-hosted journal article supplement (doi:10.1101/gr.234948.118), 2019-02-08

Barcode

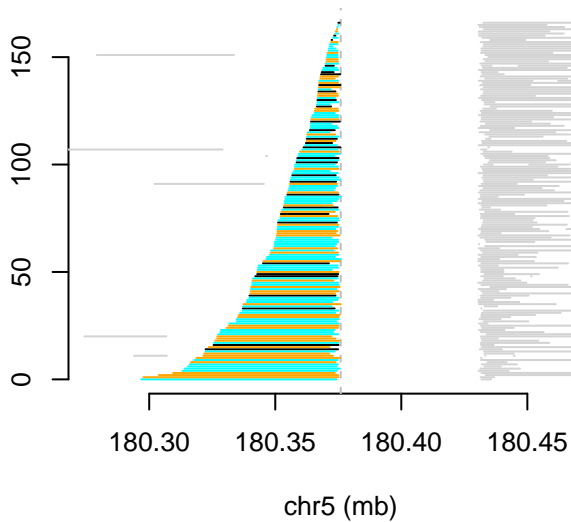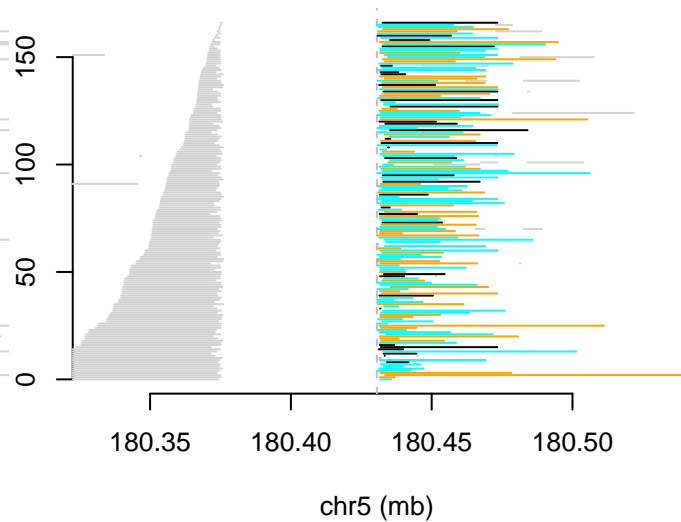

Copy number

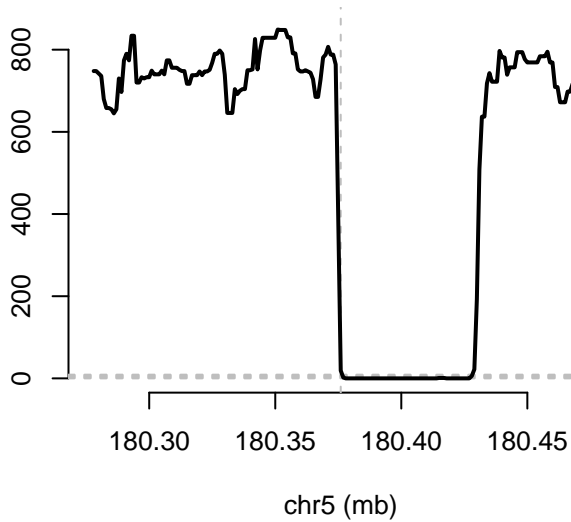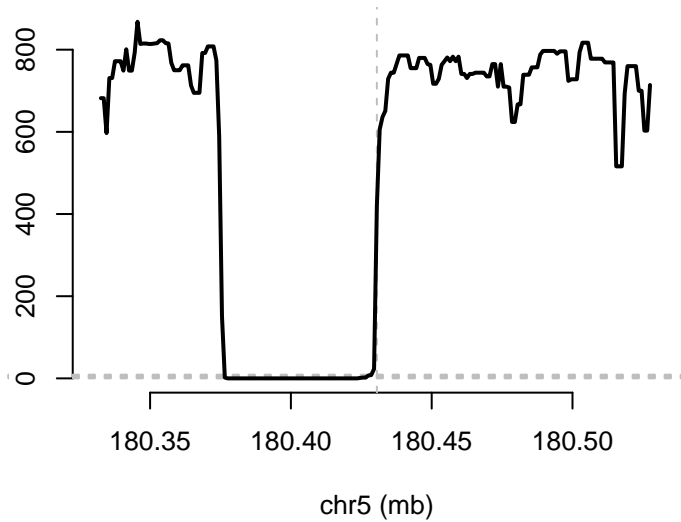

K562 chr5:180,430,529::chr5:180,375,977-+

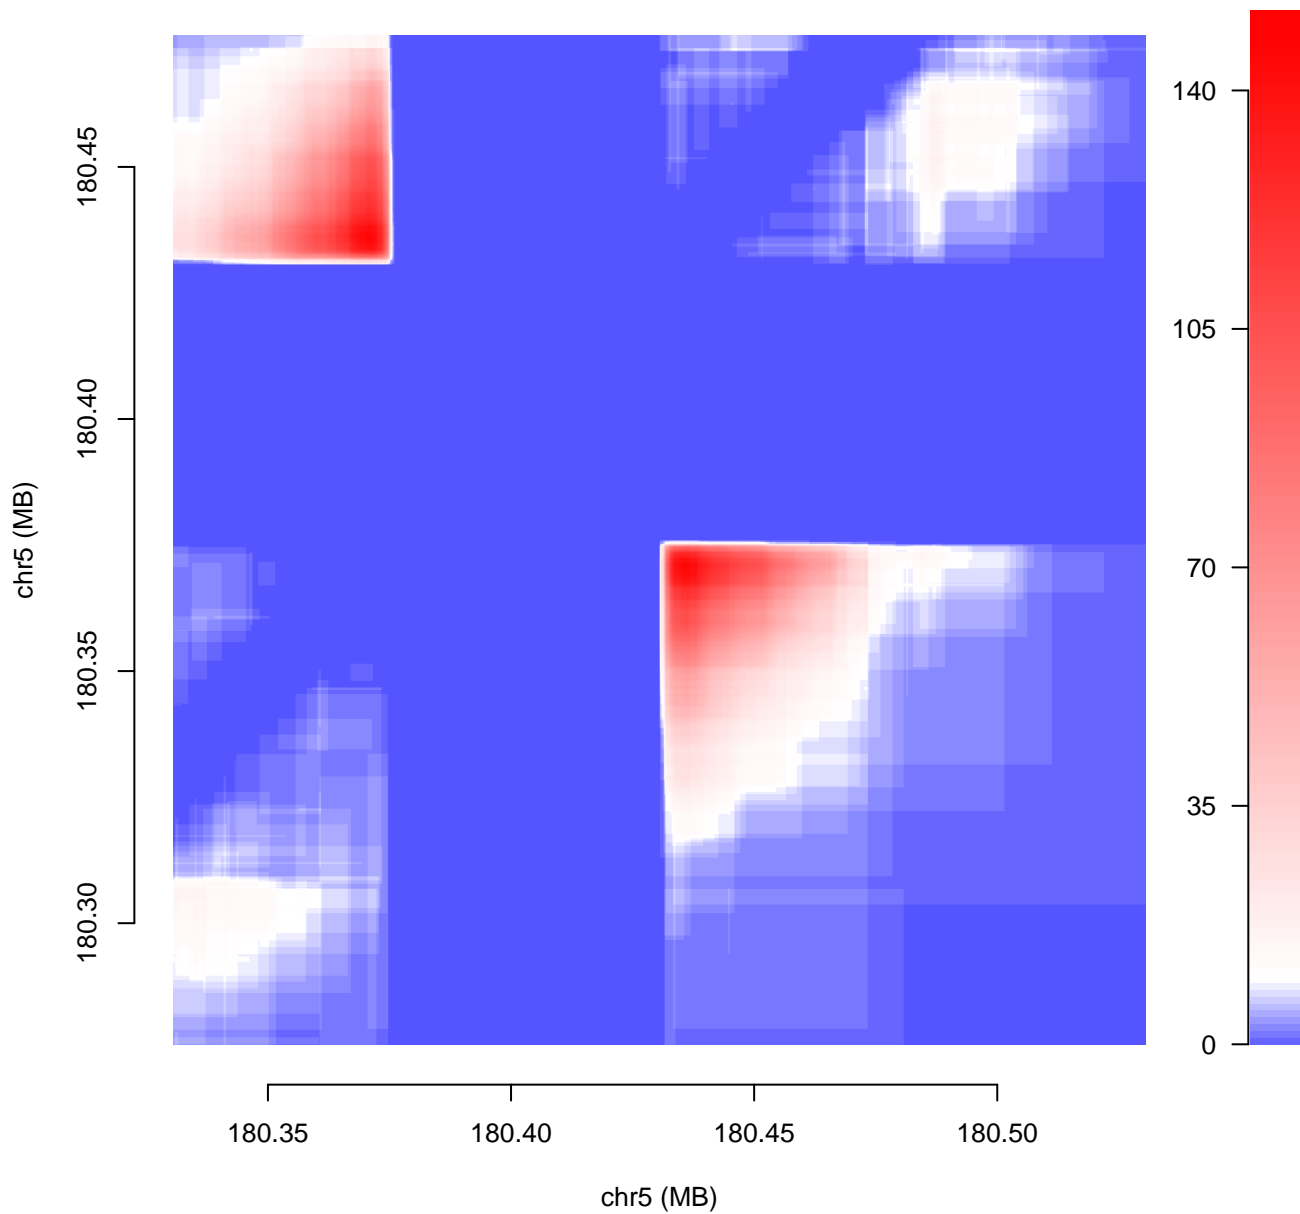

Supplement: Supplemental_Data.zip [file event_19.pdf › event_19.pdf]

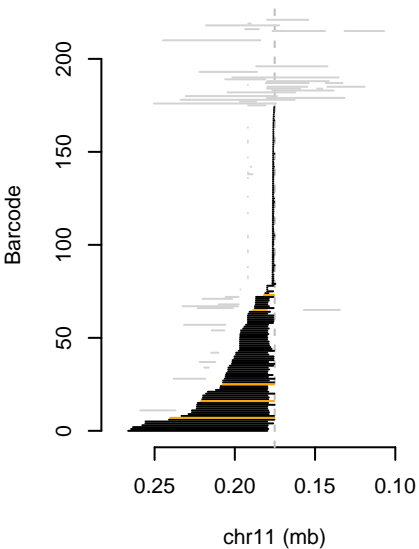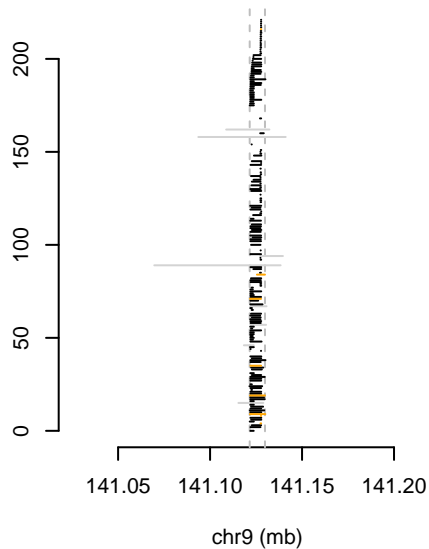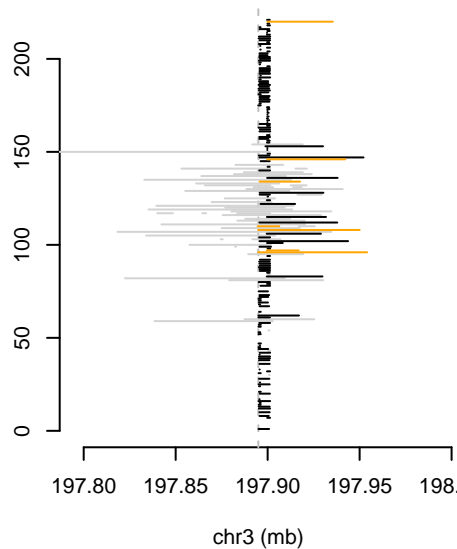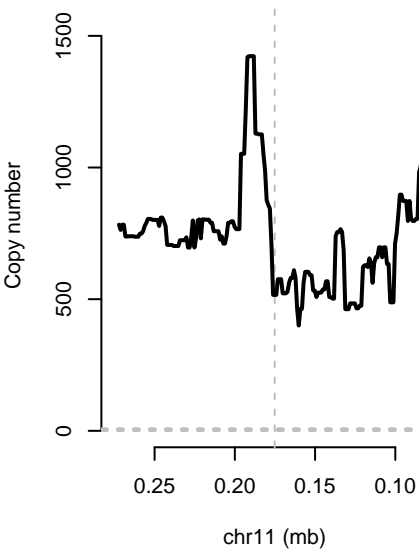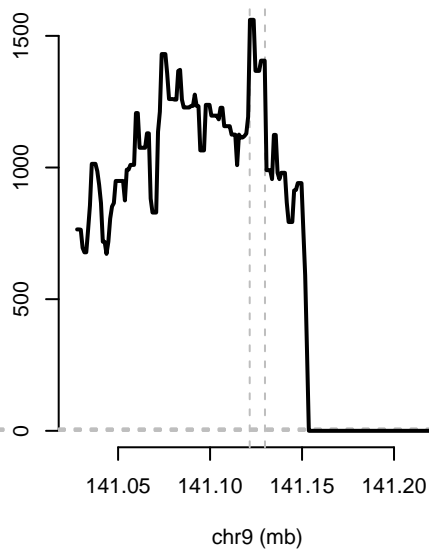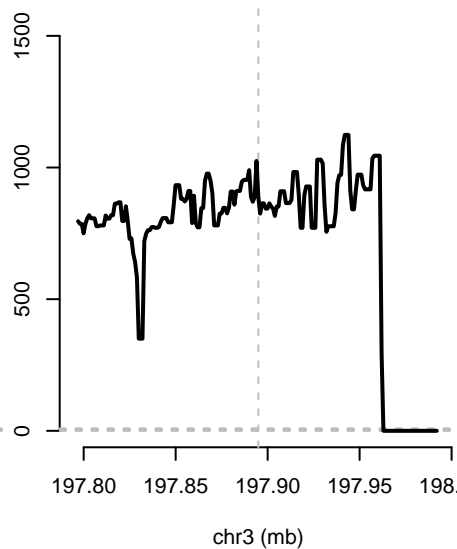

K562 chr9:141,129,851::chr9:141,121,533+-

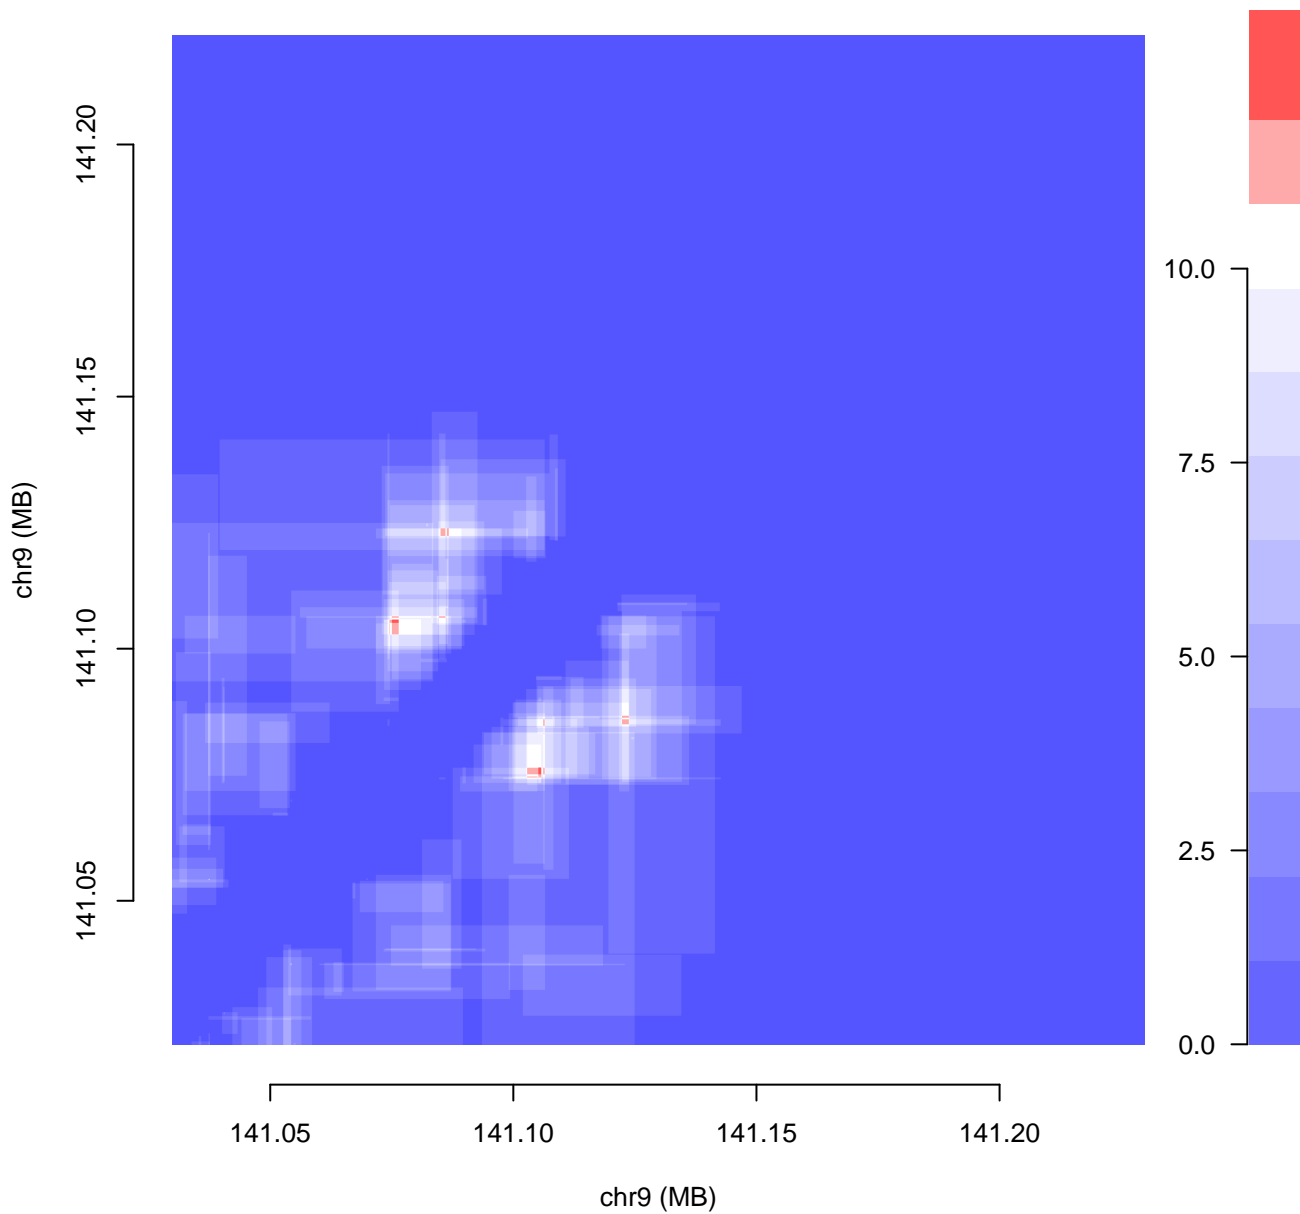

K562 chr9:141,129,851::chr3:197,894,948+-

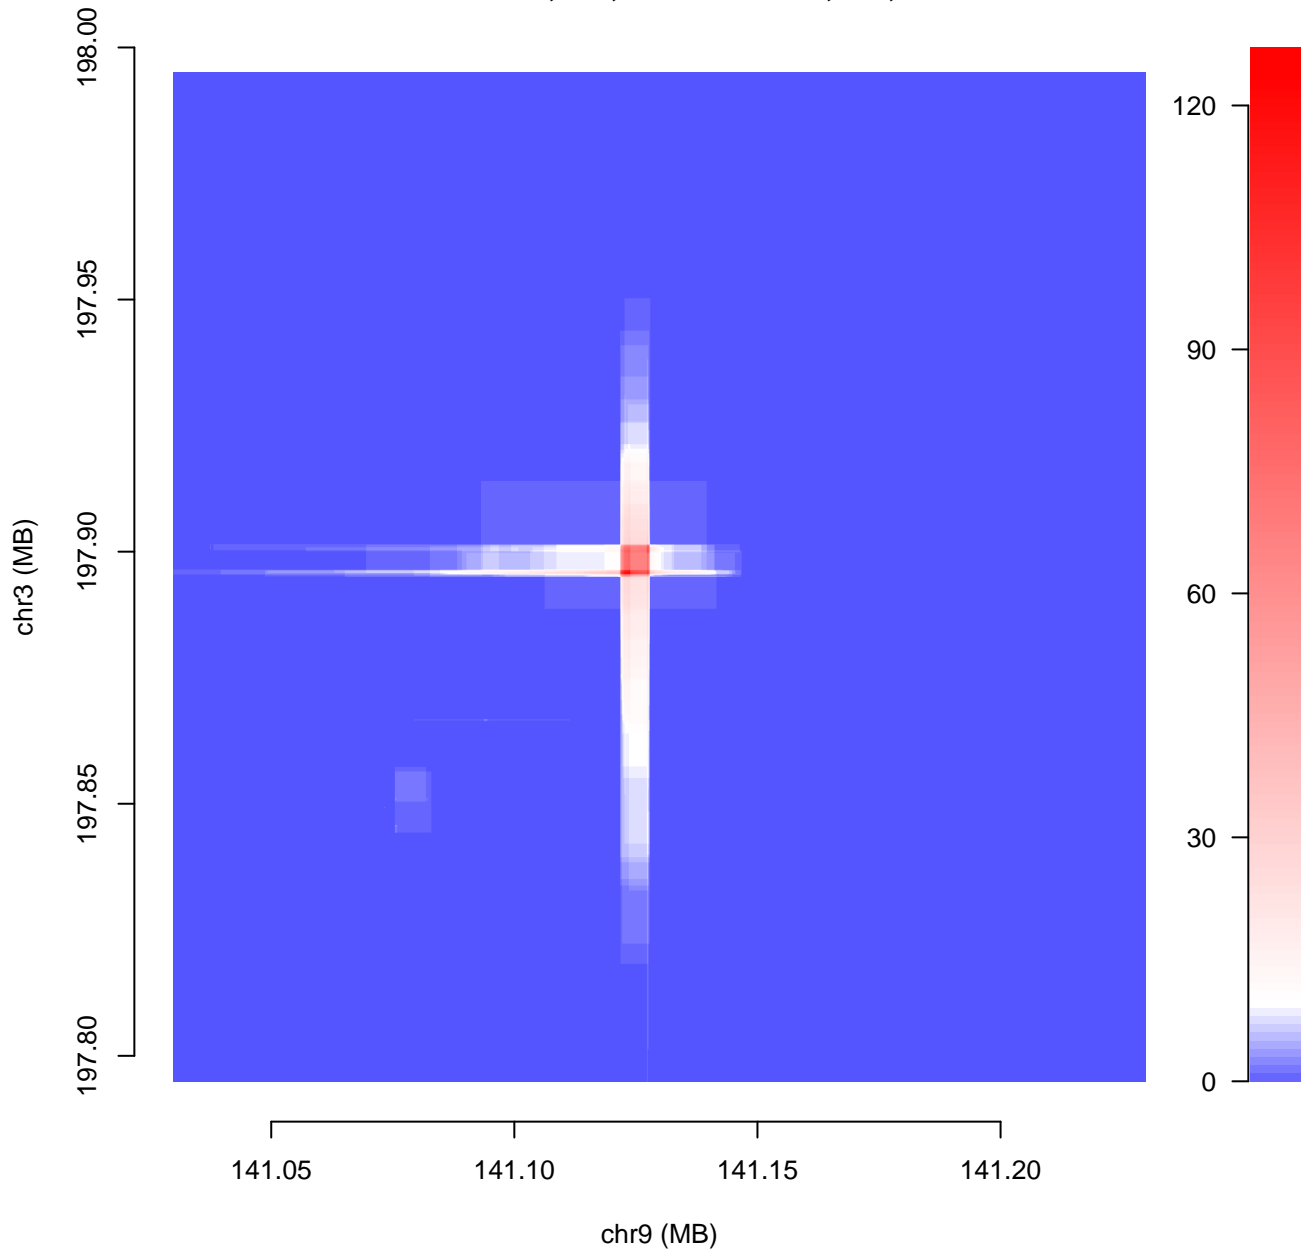

K562 chr9:141,121,533::chr11:175,156--

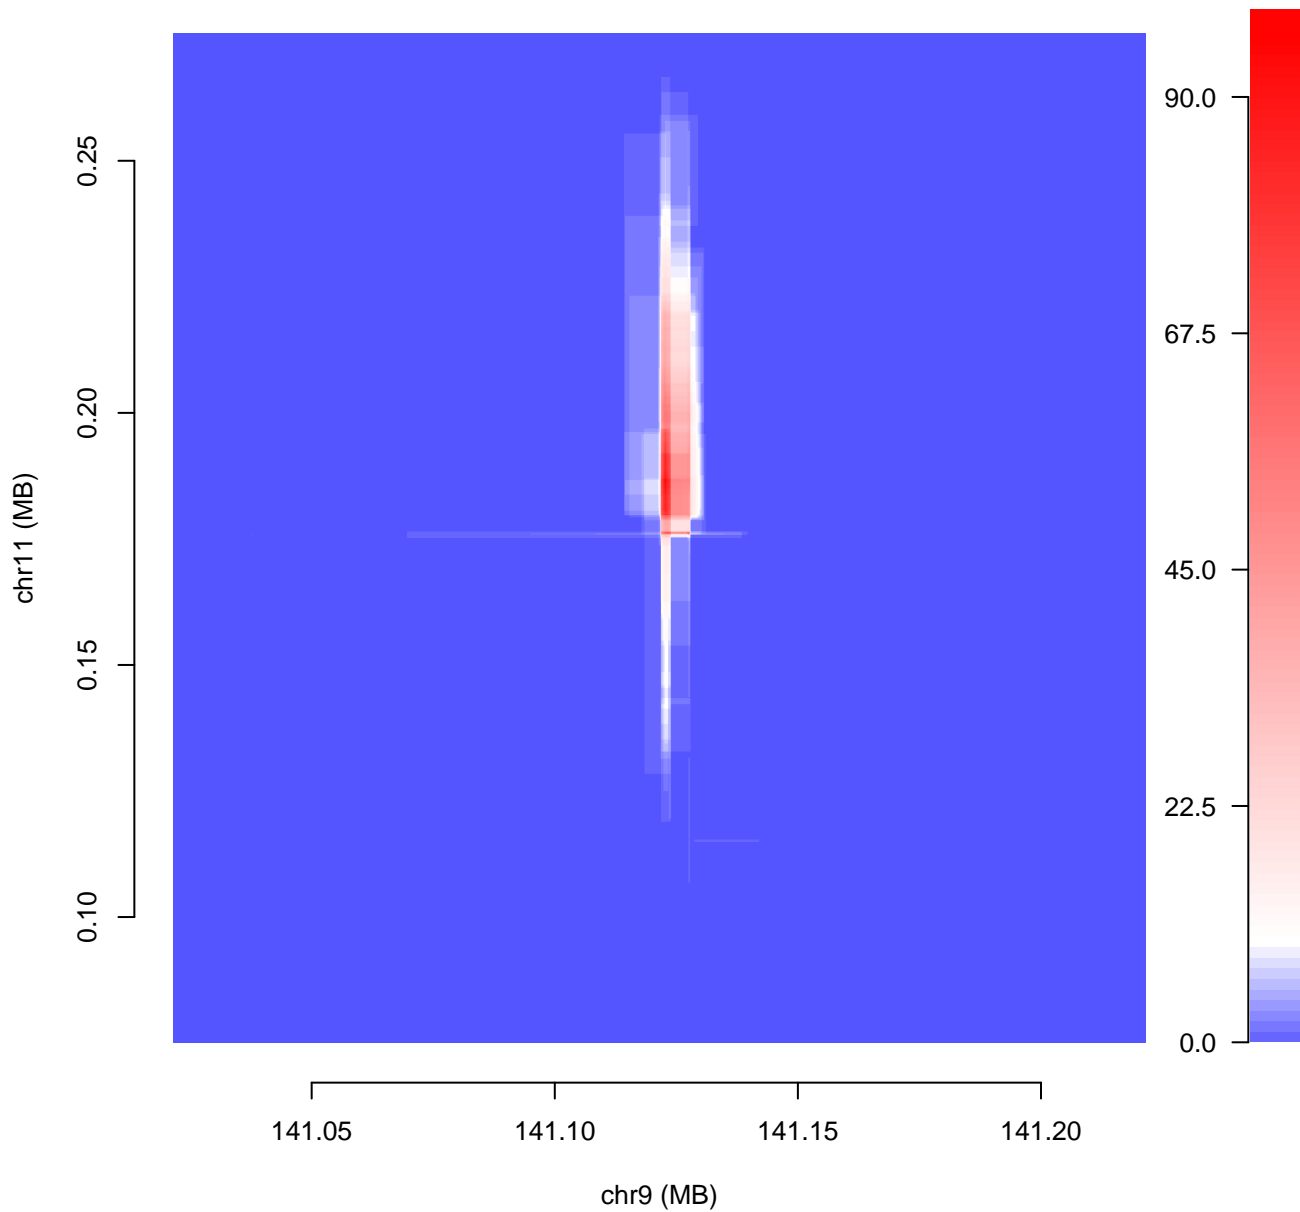

Supplement: Supplemental_Data.zip [file event_190.pdf › event_190.pdf]

Barcode

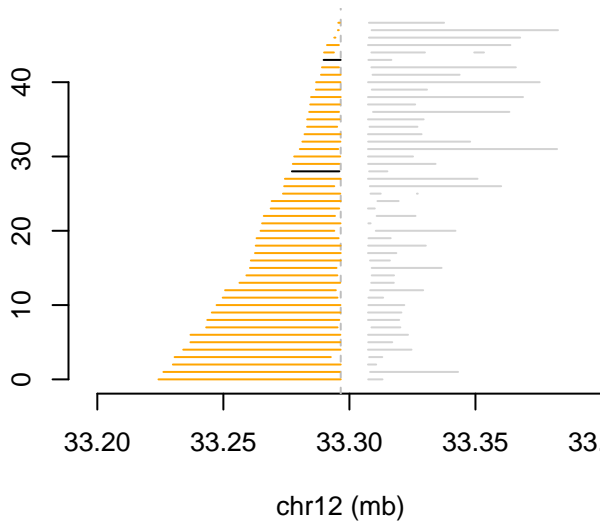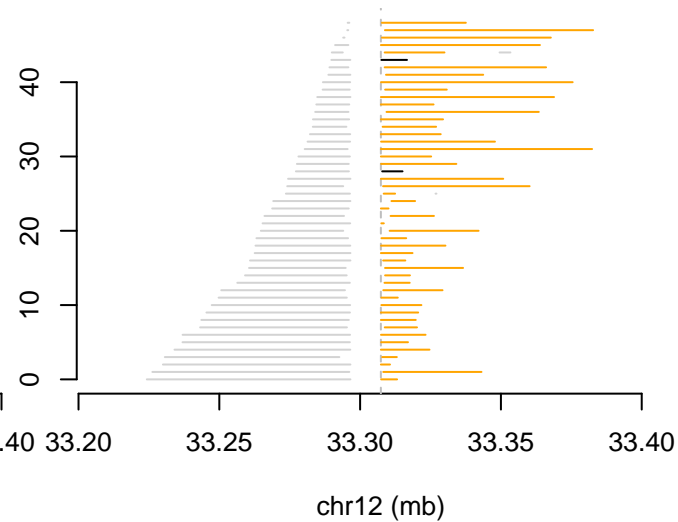

Copy number

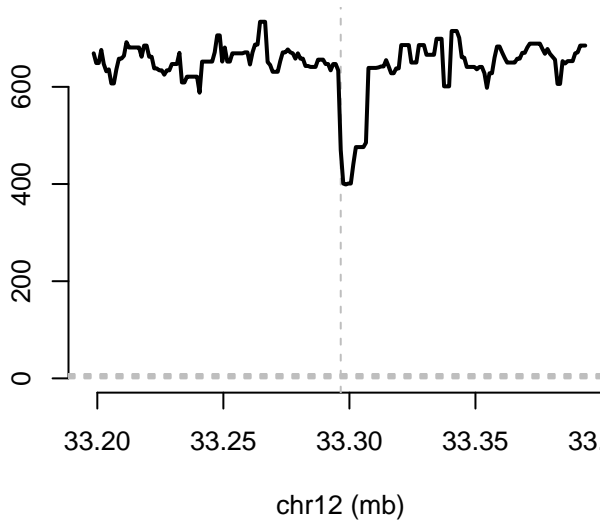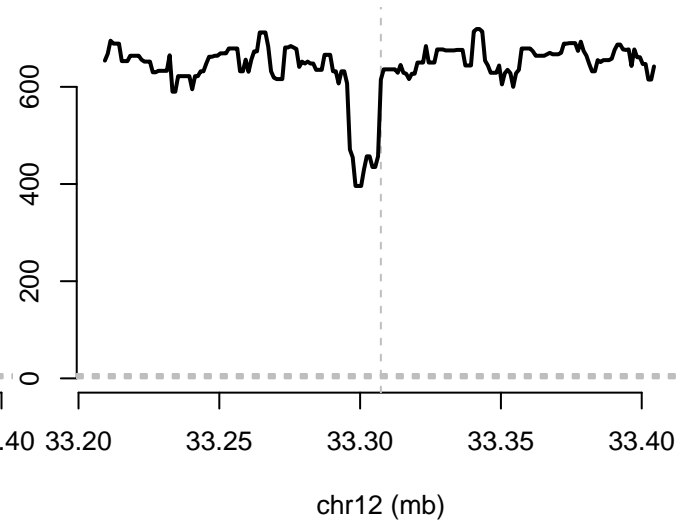

K562 chr12:33,296,559::chr12:33,307,366+-

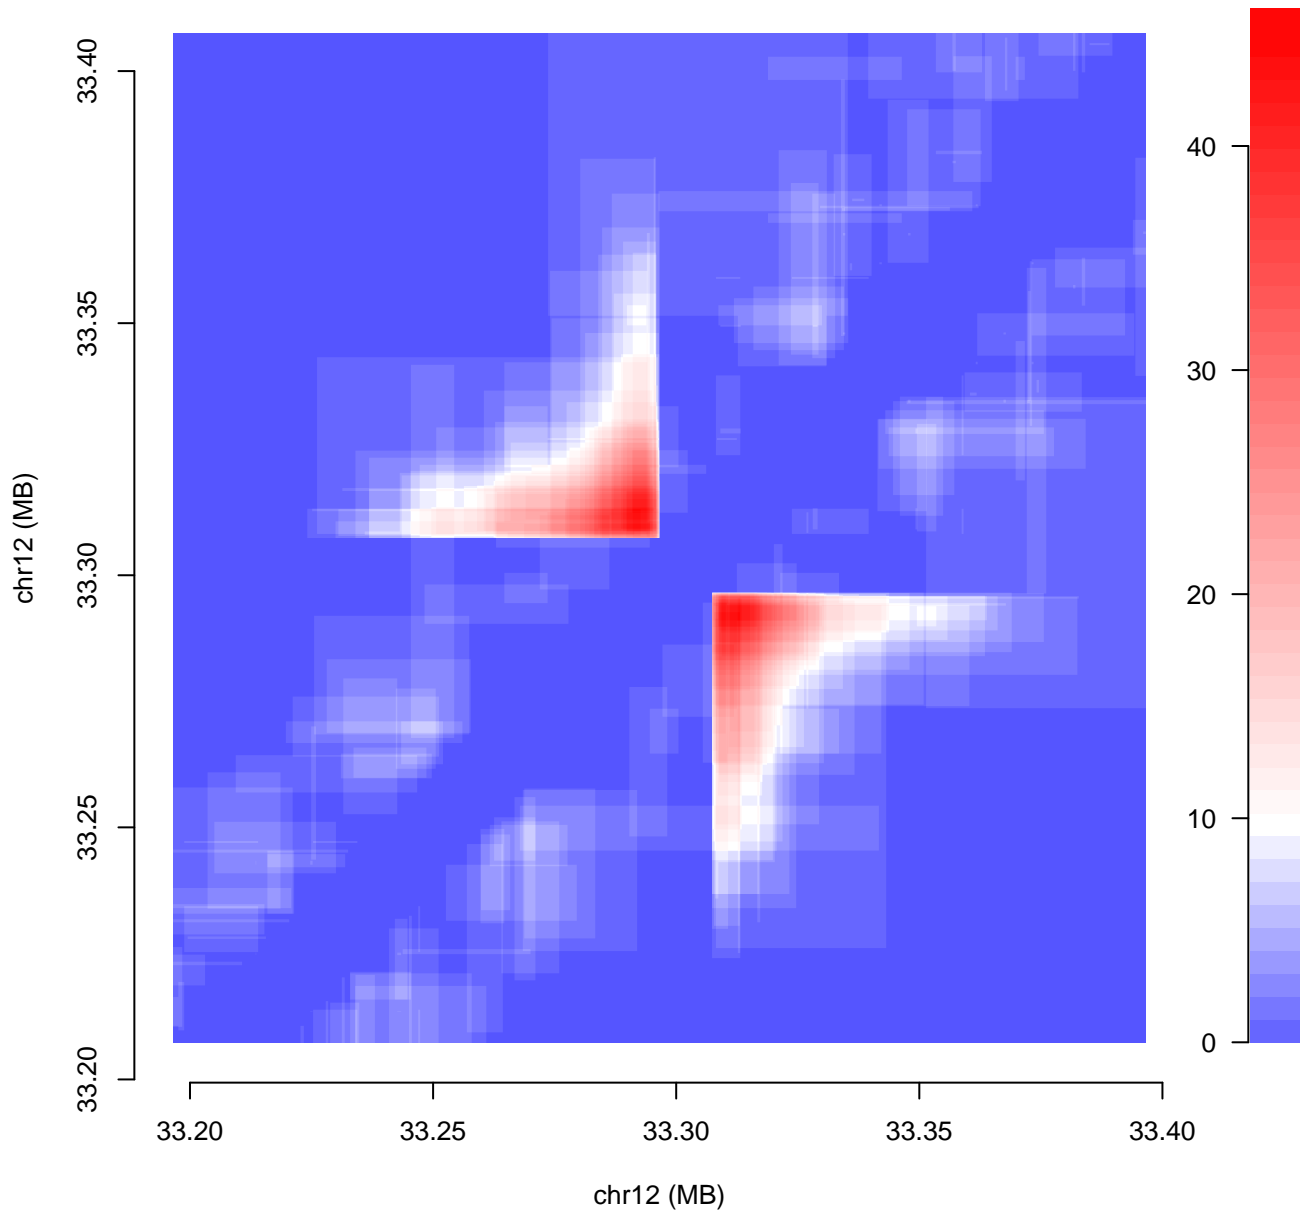

Supplement: Supplemental_Data.zip [file event_191.pdf › event_191.pdf]

Barcode

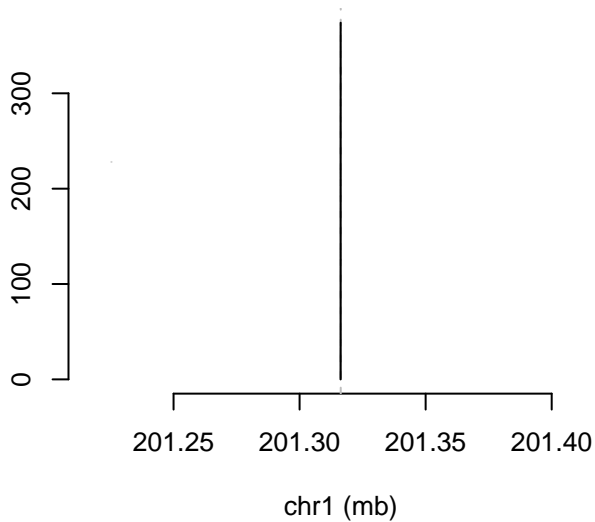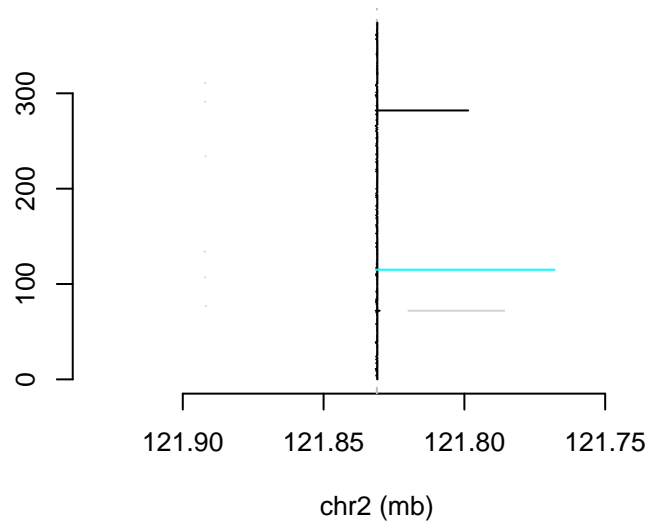

Copy number

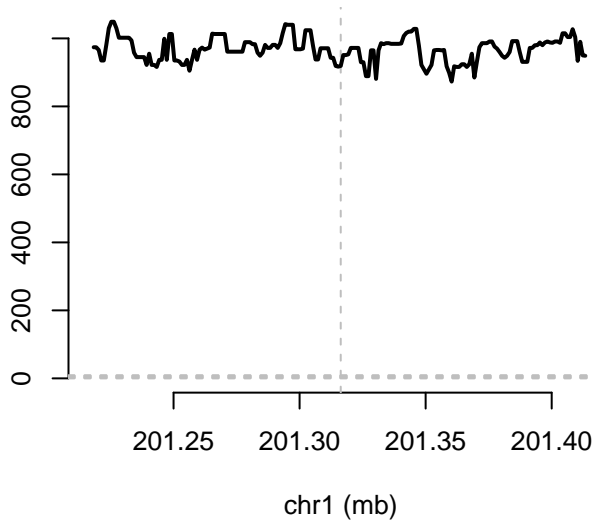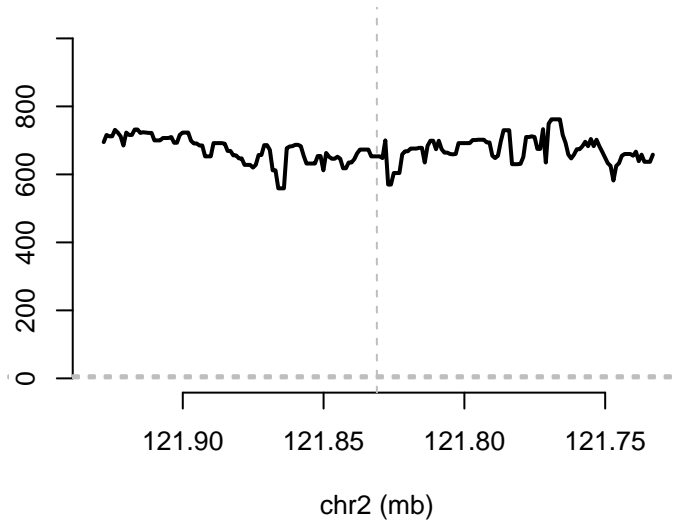

K562 chr1:201,316,324::chr2:121,831,080++

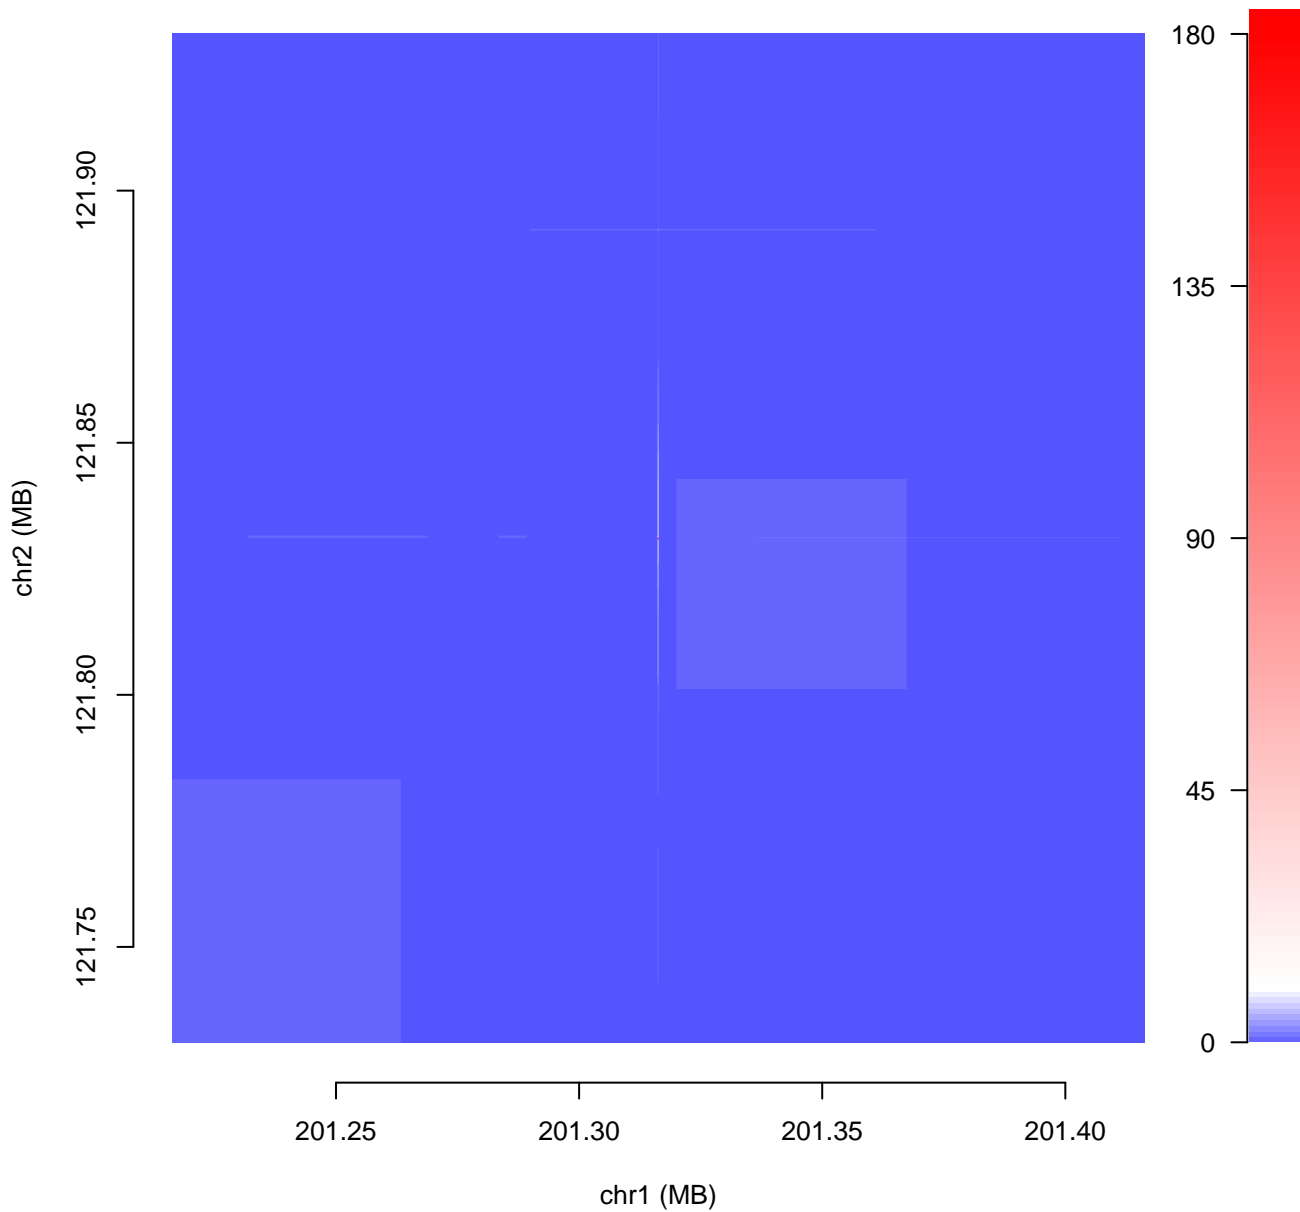

Supplement: Supplemental_Data.zip [file event_192.pdf › event_192.pdf]

Barcode

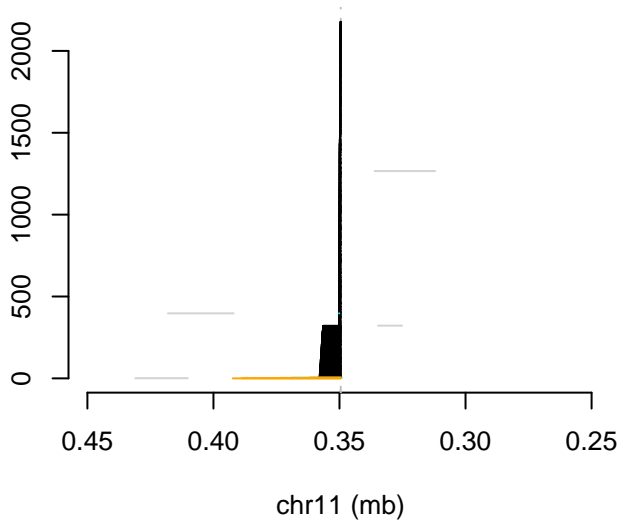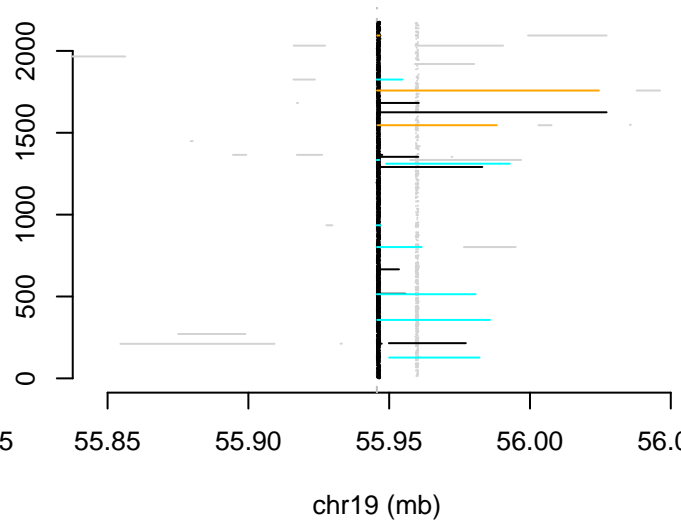

Copy number

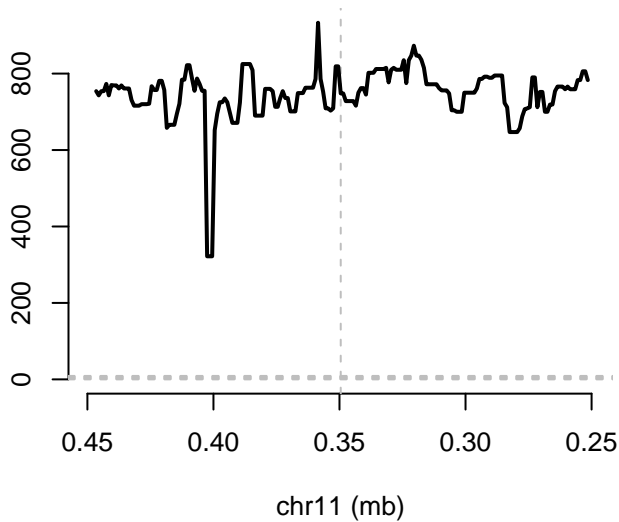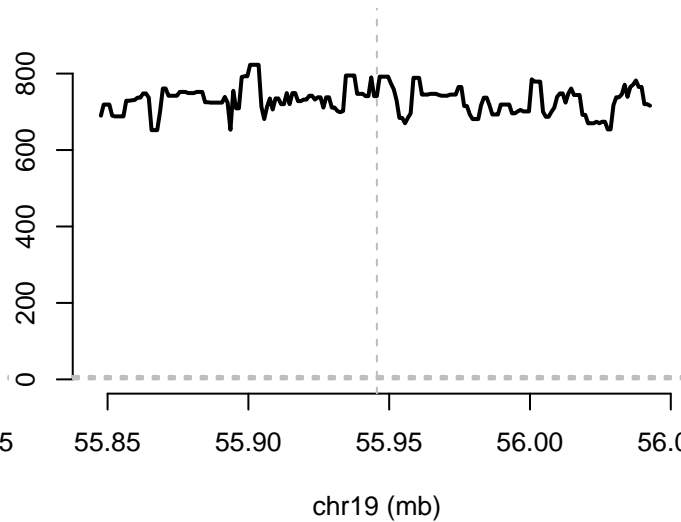

K562 chr19:55,945,626::chr11:349,501--

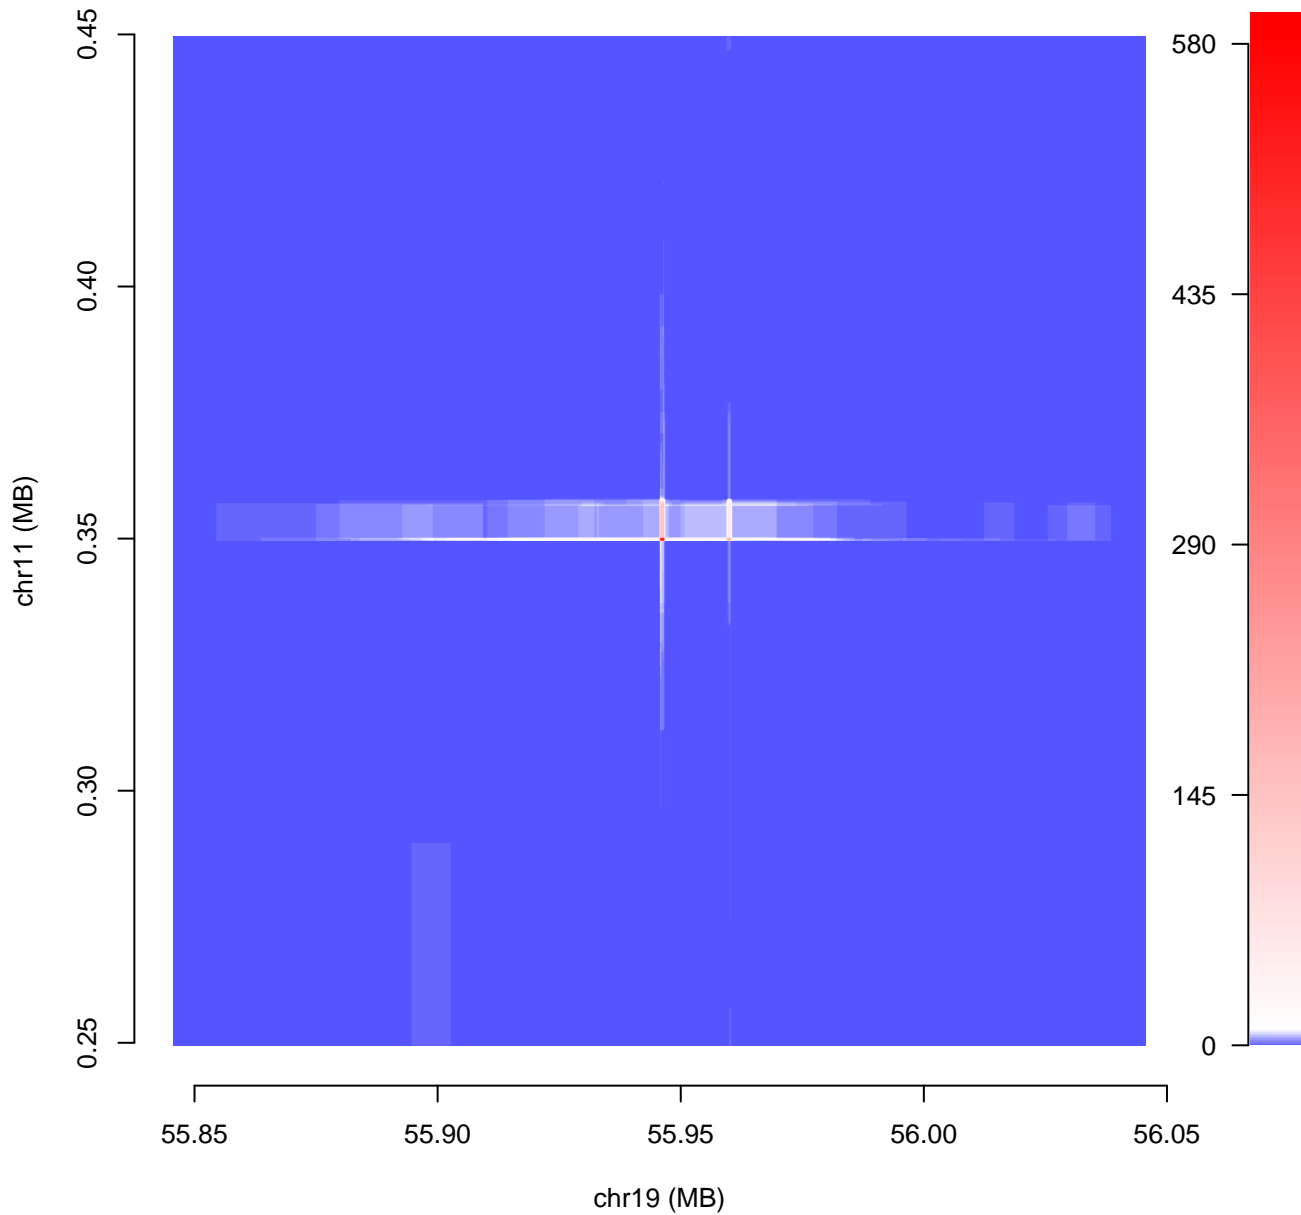

Supplement: Supplemental_Data.zip [file event_193.pdf › event_193.pdf]

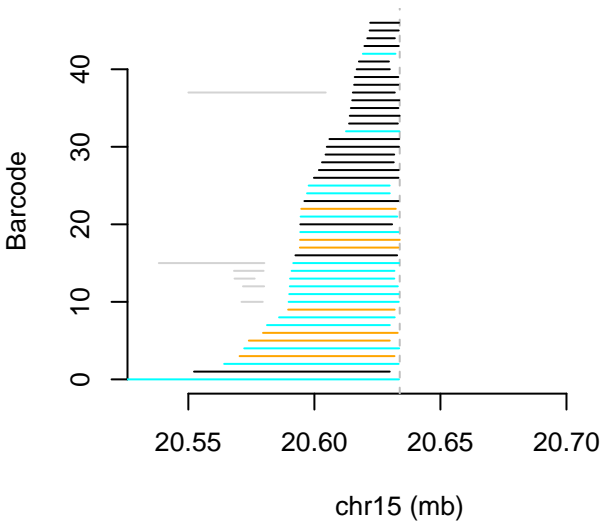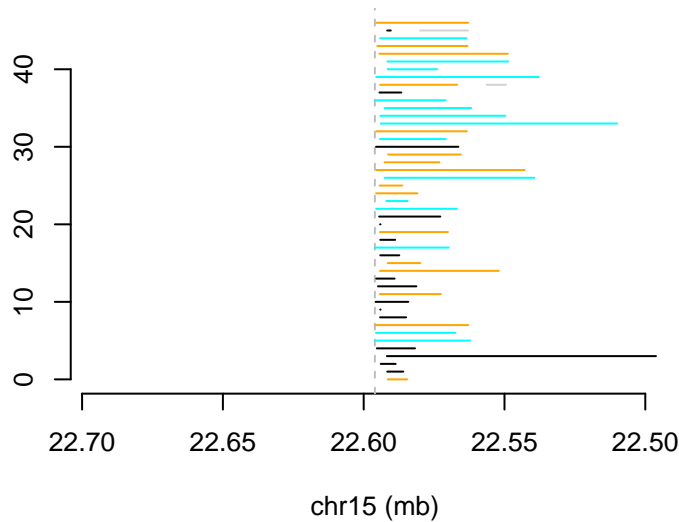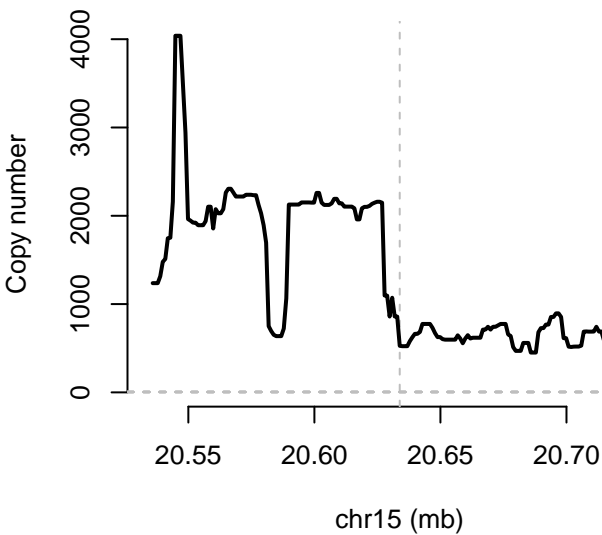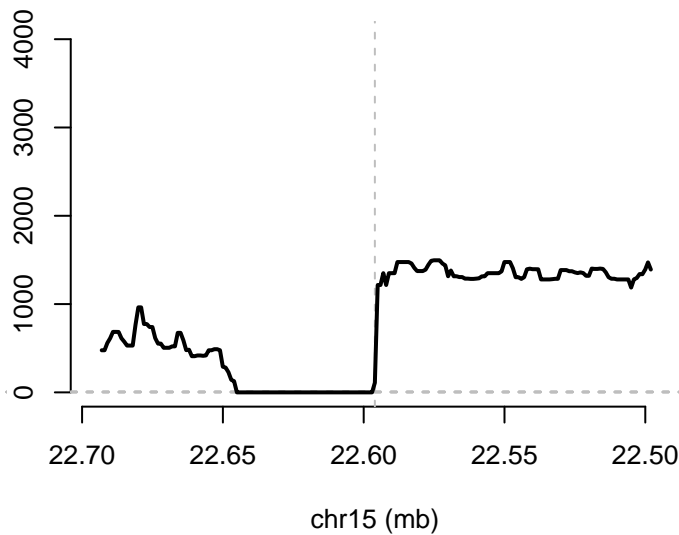

K562 chr15:20,633,857::chr15:22,596,026++

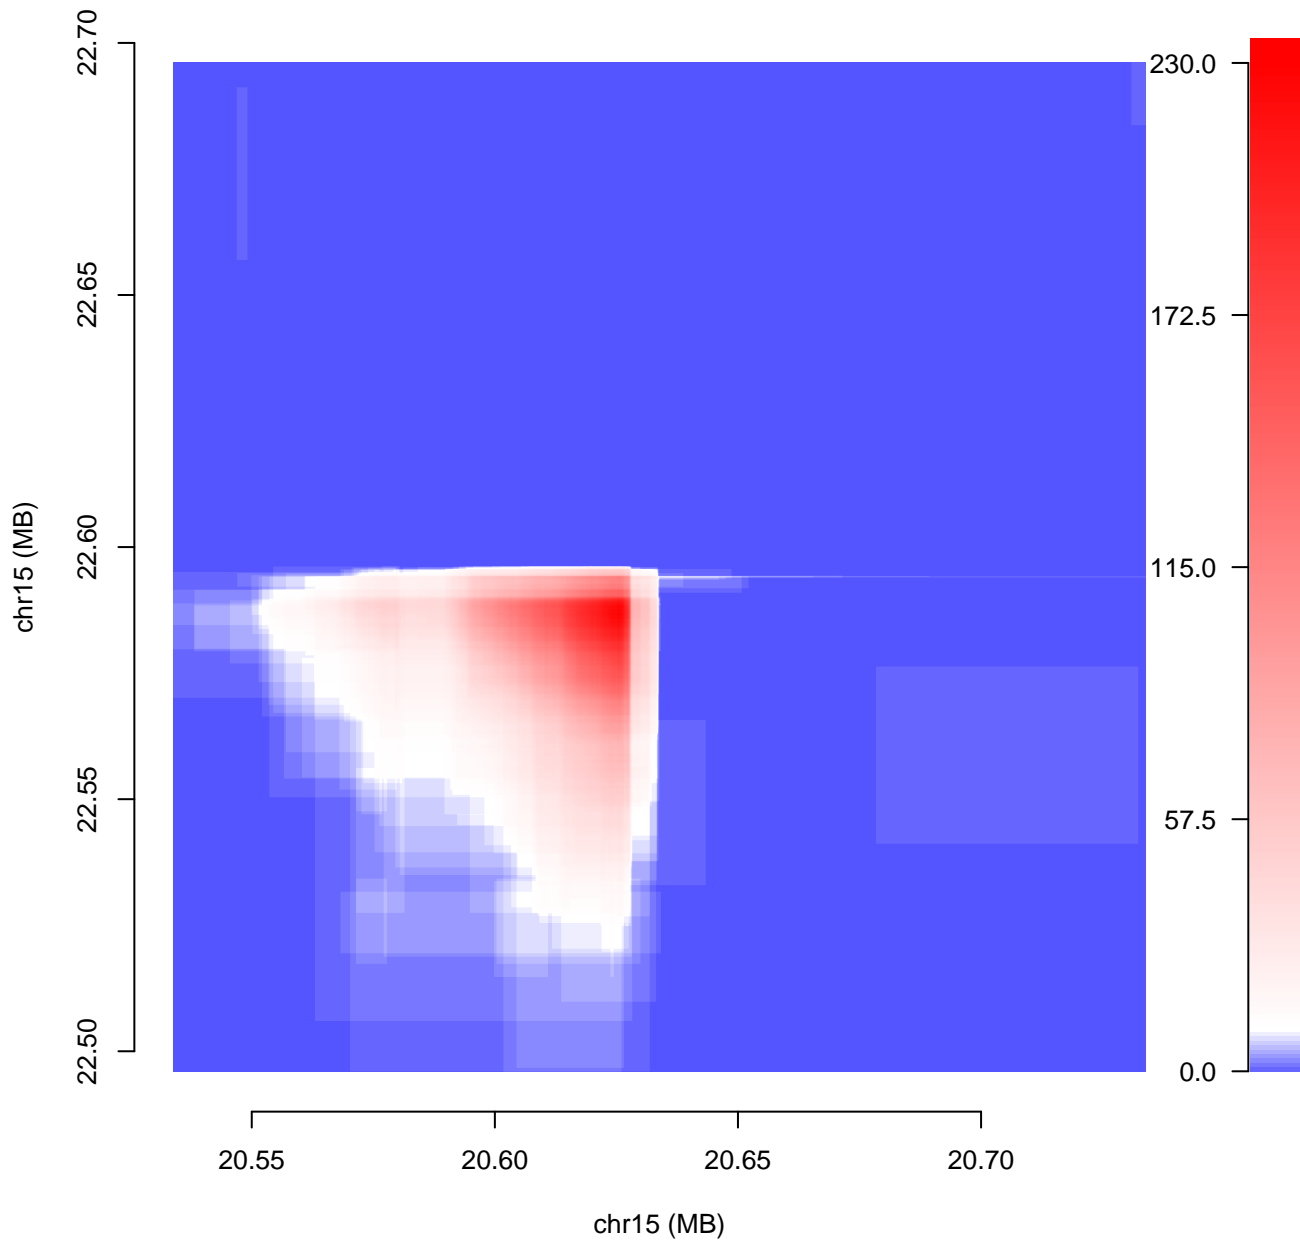

Supplement: Supplemental_Data.zip [file event_194.pdf › event_194.pdf]

Barcode

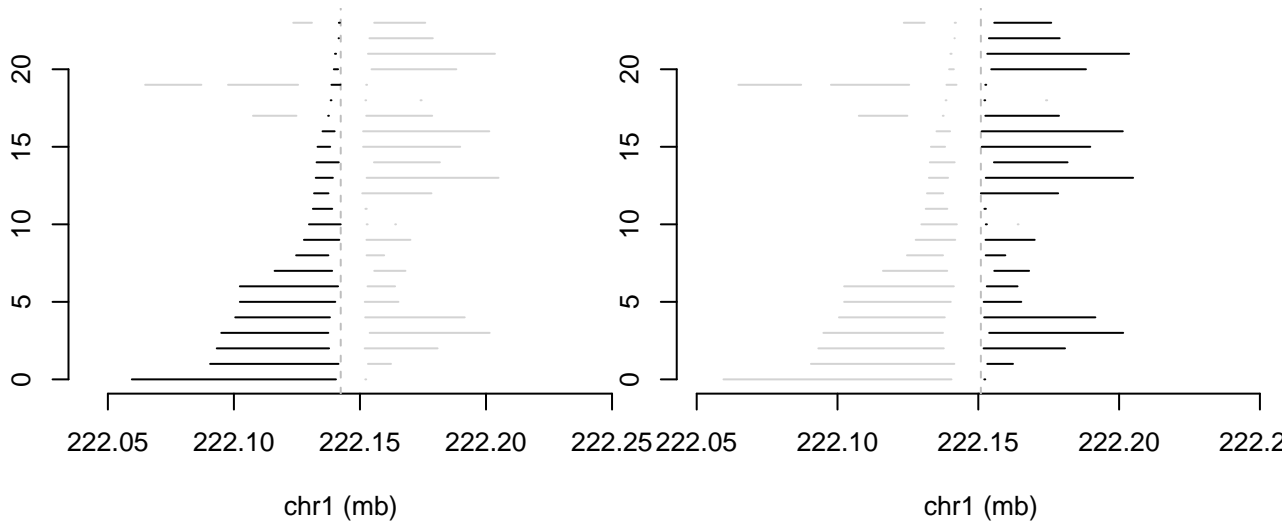

Copy number

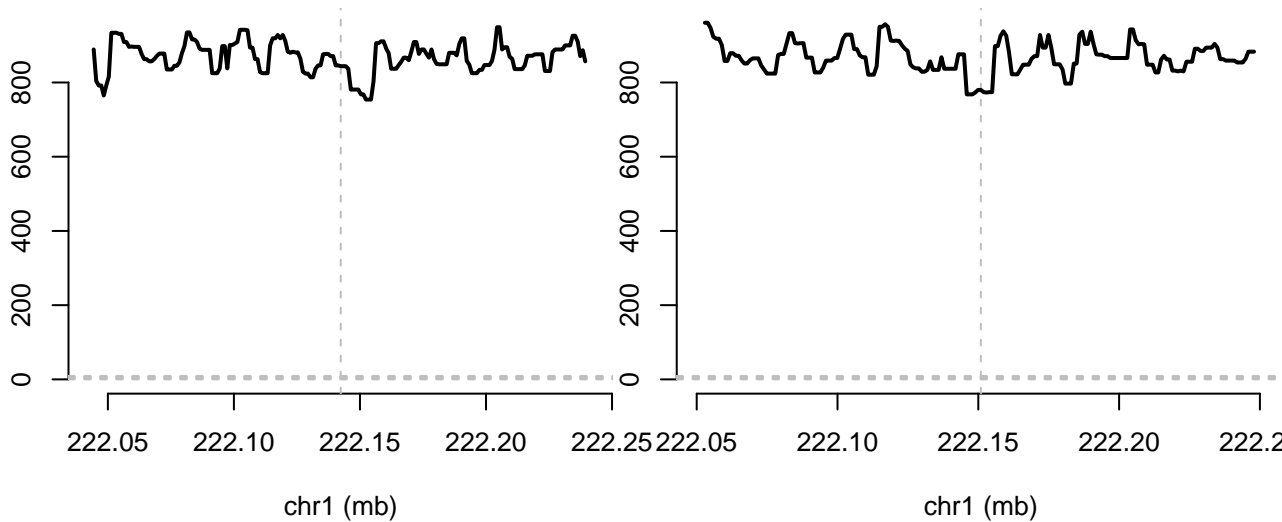

K562 chr1:222,150,909::chr1:222,142,378-+

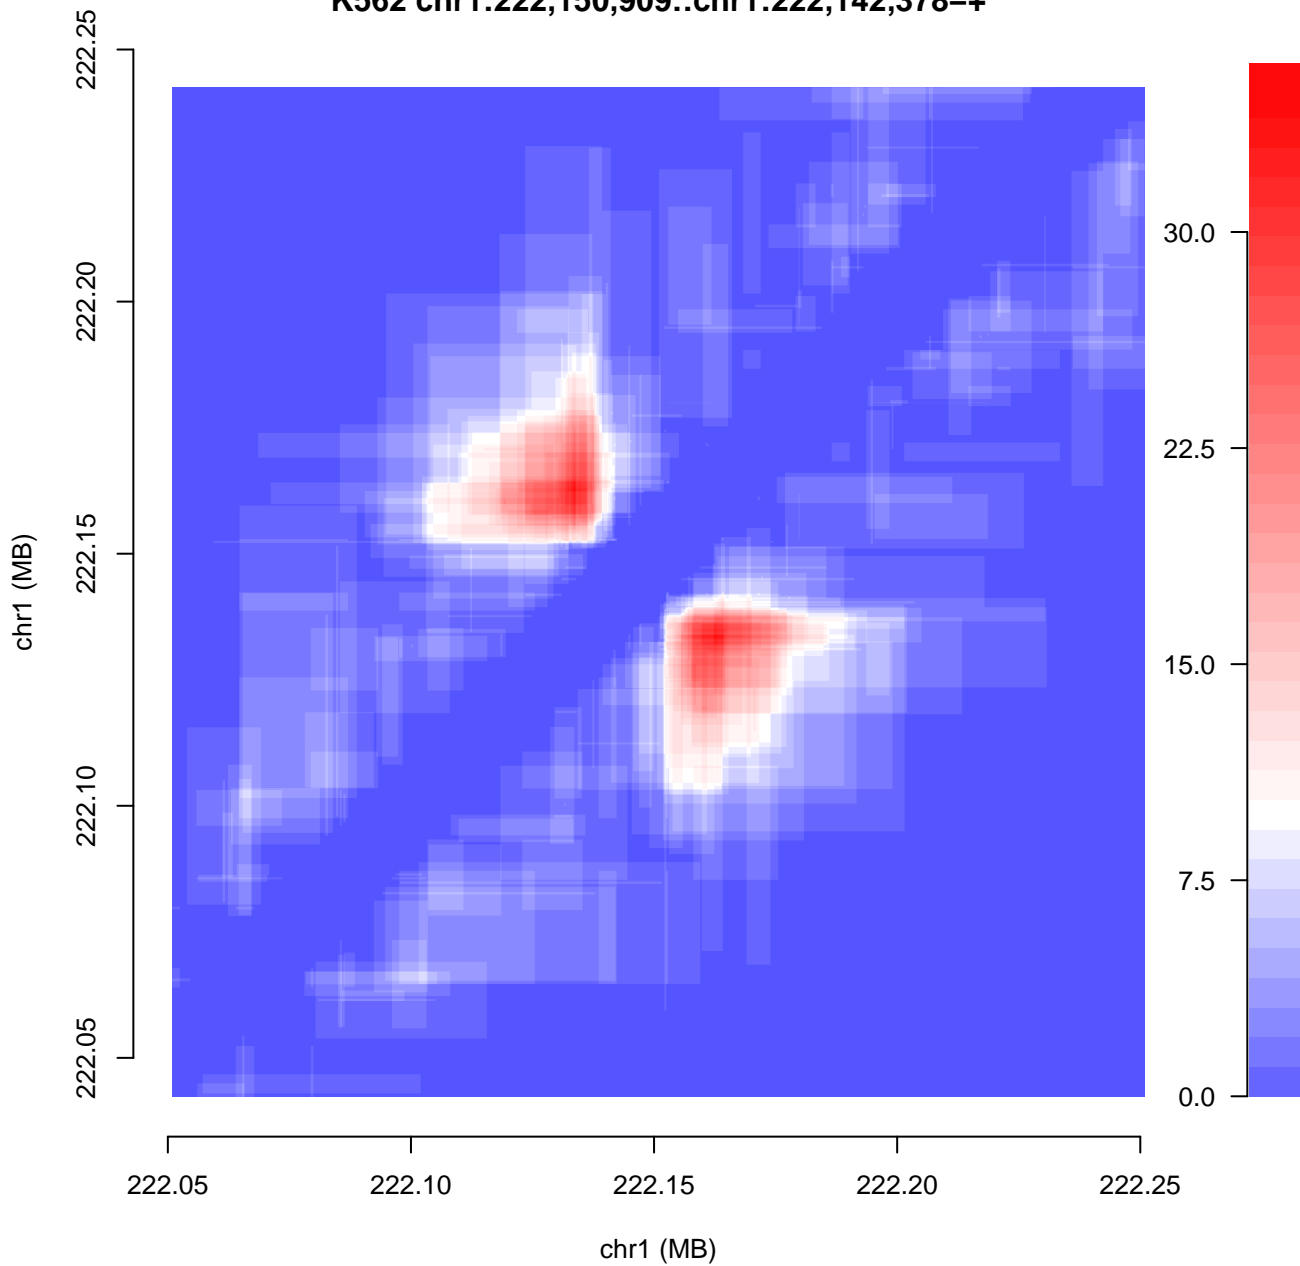

Supplement: Supplemental_Data.zip [file event_195.pdf › event_195.pdf]

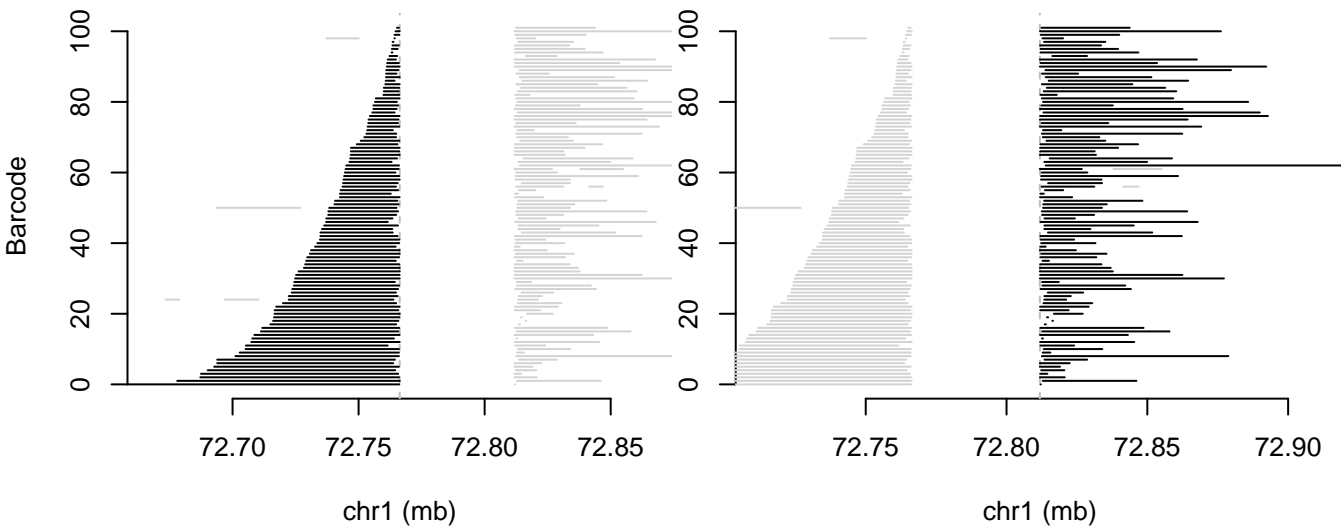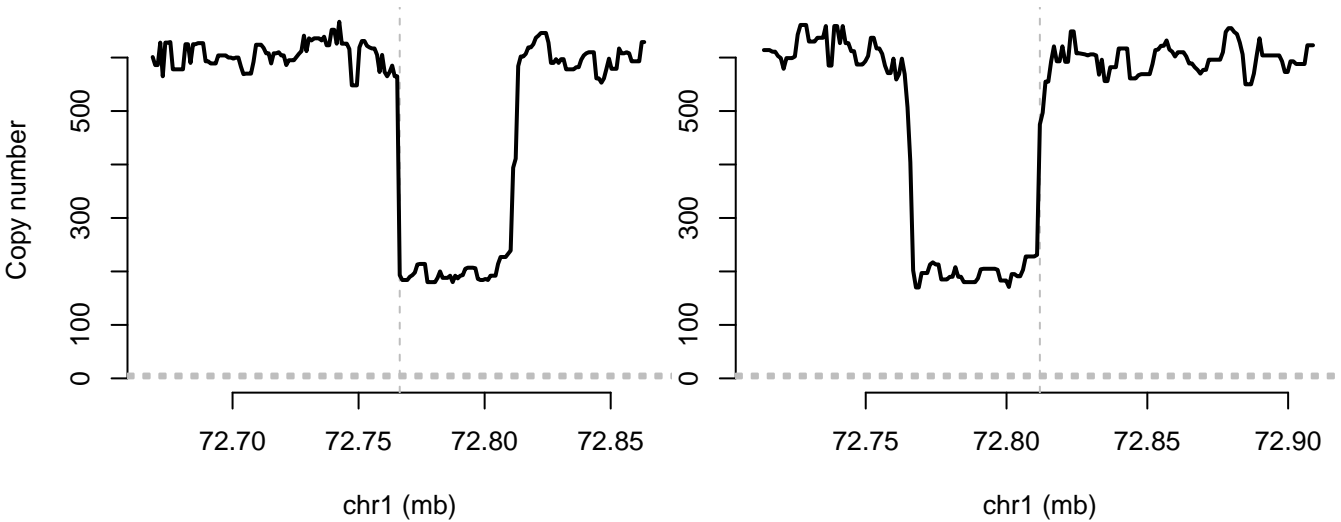

K562 chr1:72,811,839::chr1:72,766,324--+

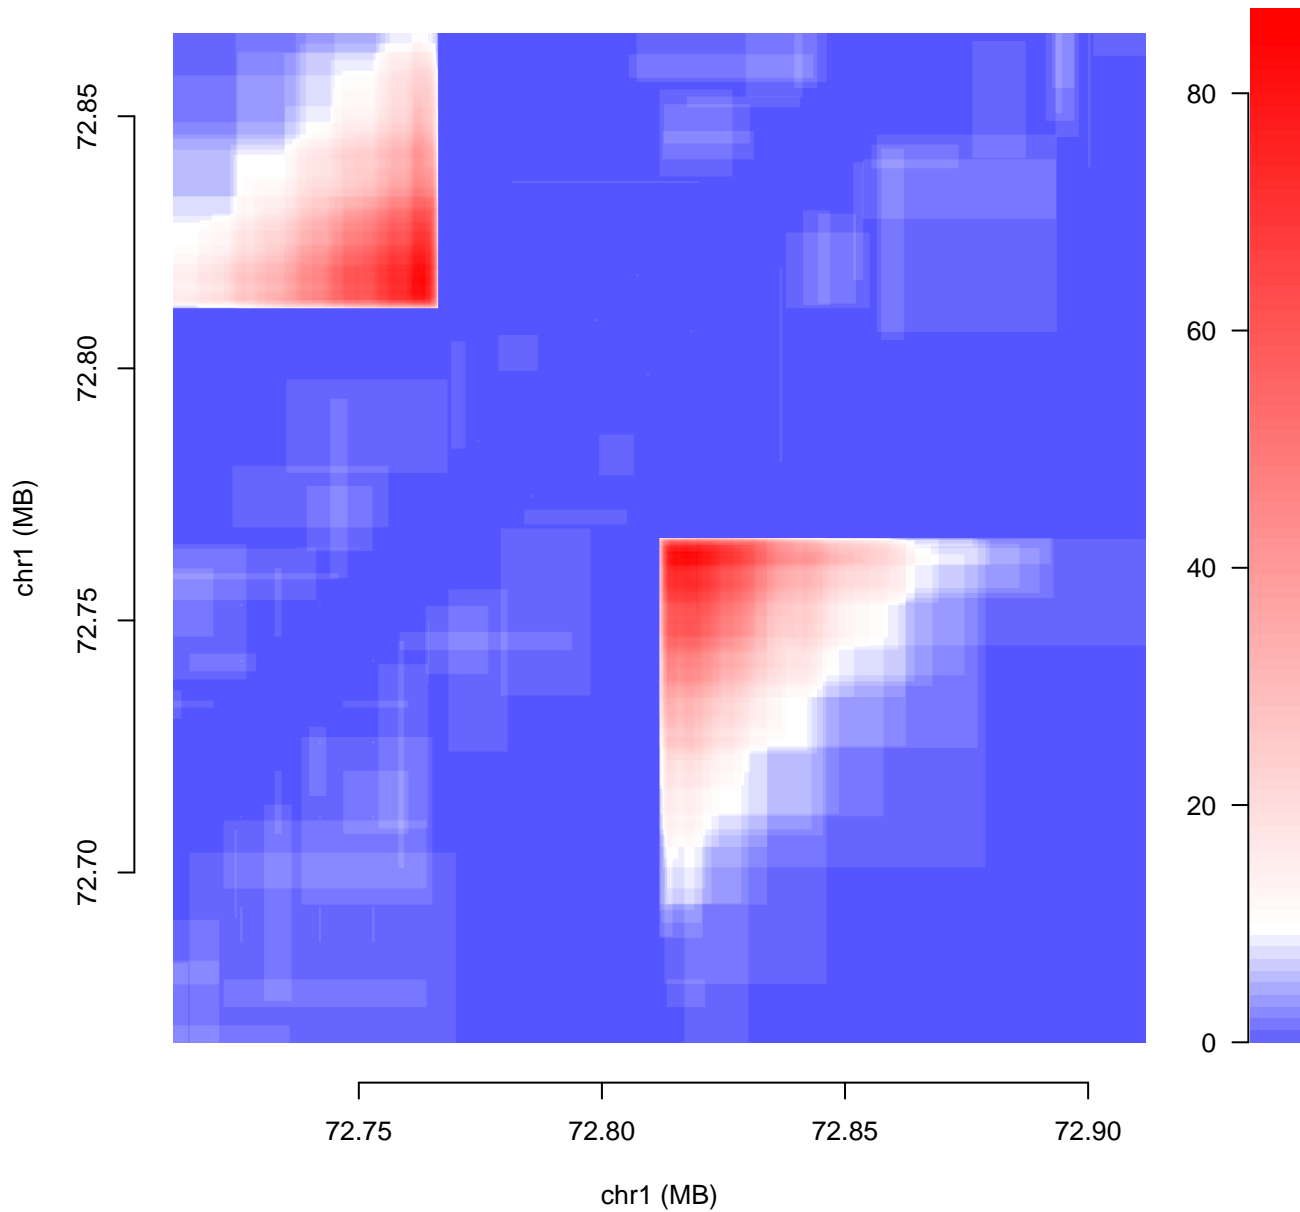

Supplement: Supplemental_Data.zip [file event_196.pdf › event_196.pdf]

Barcode

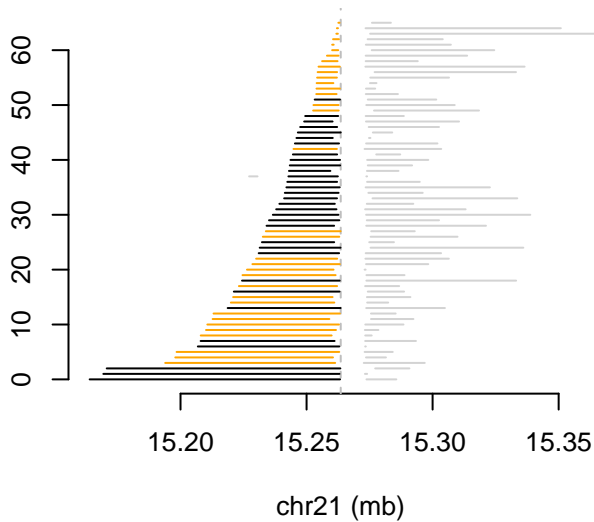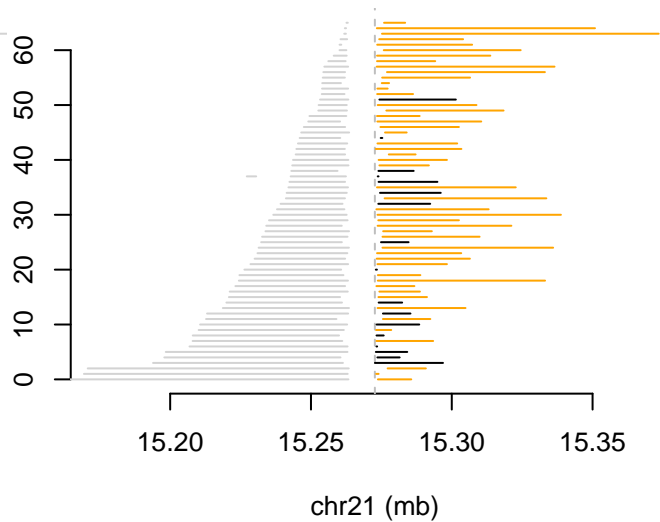

Copy number

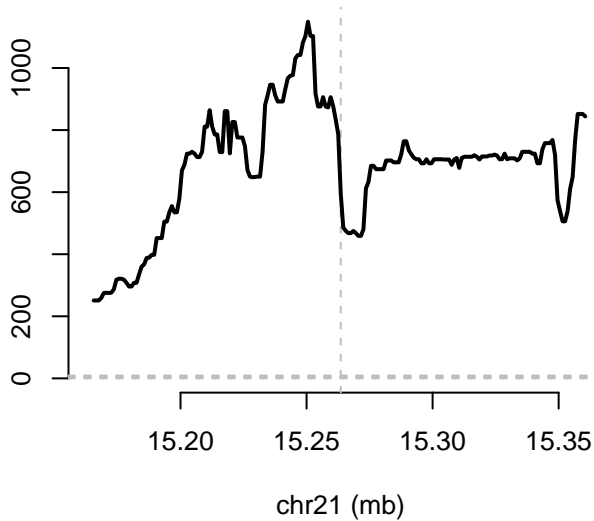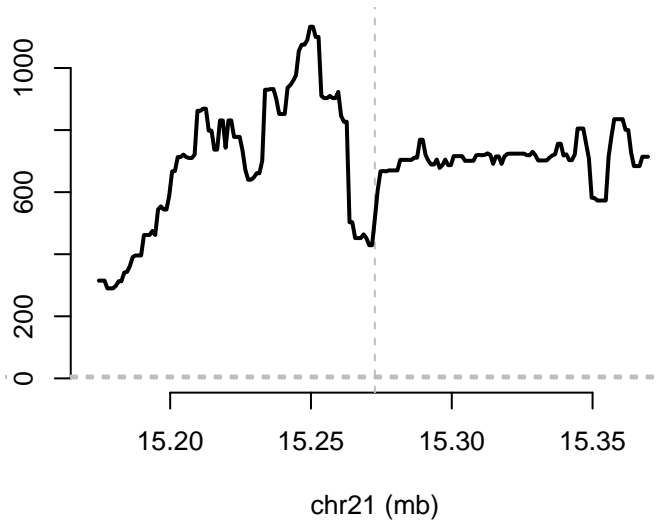

K562 chr21:15,272,691::chr21:15,263,557-+

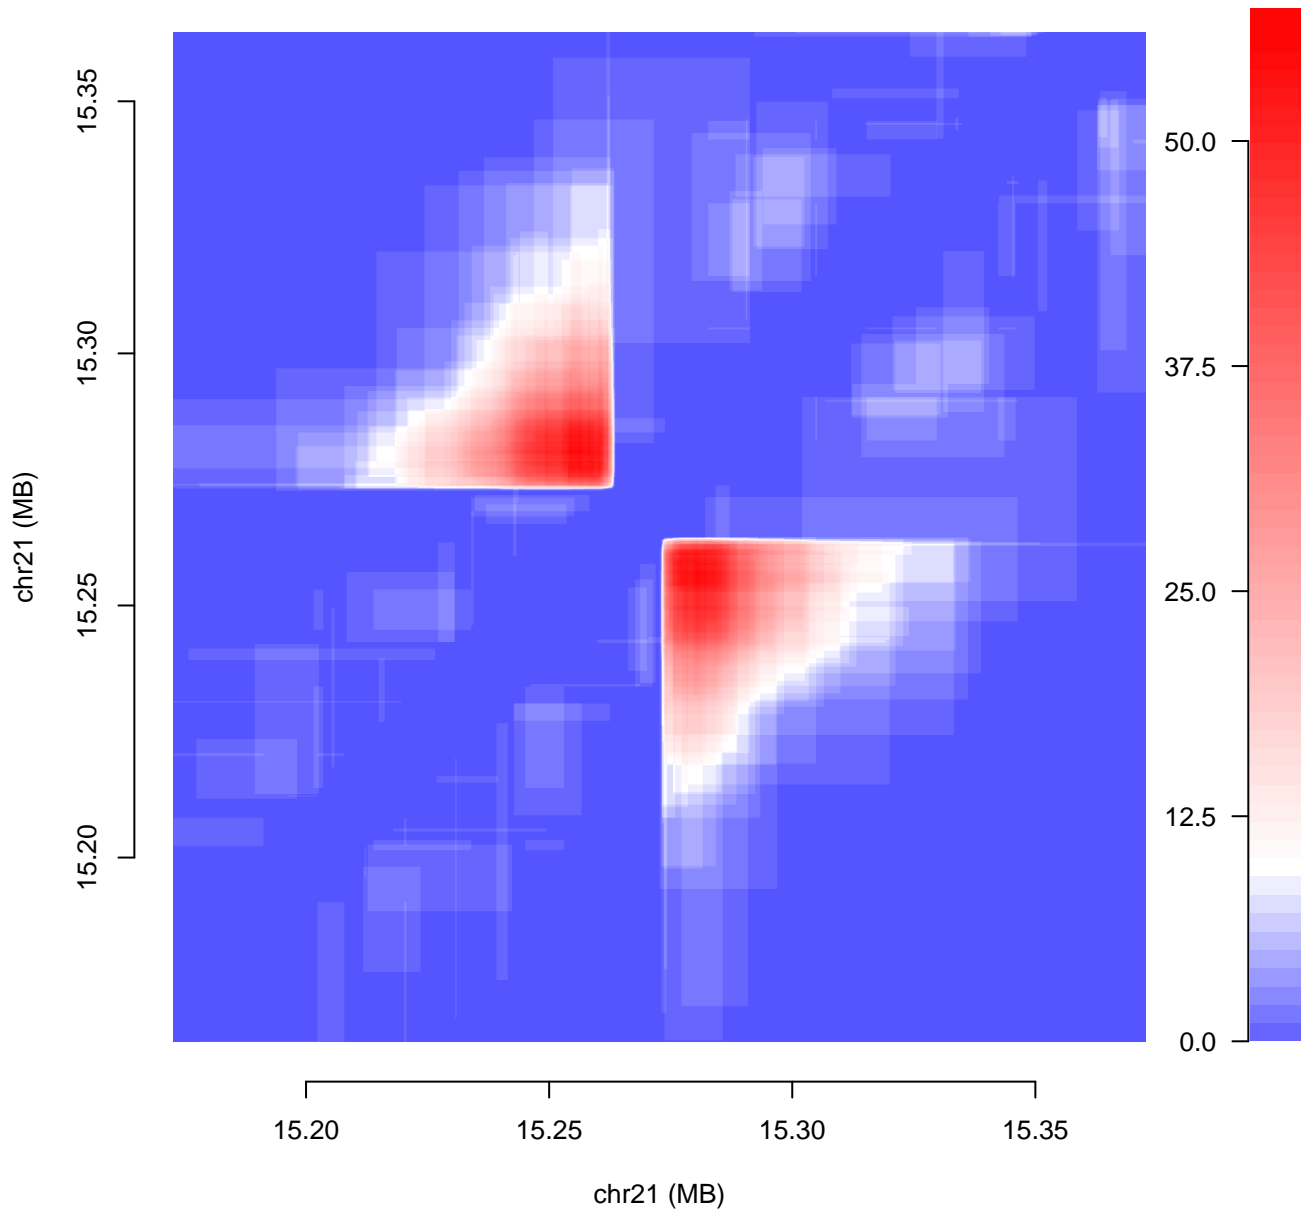

Supplement: Supplemental_Data.zip [file event_197.pdf › event_197.pdf]

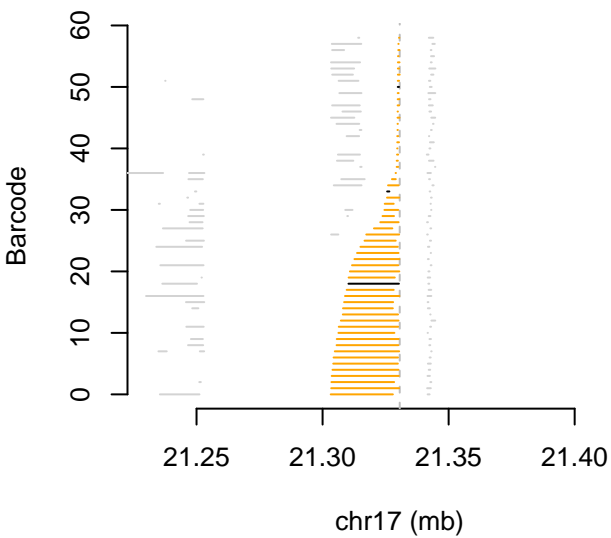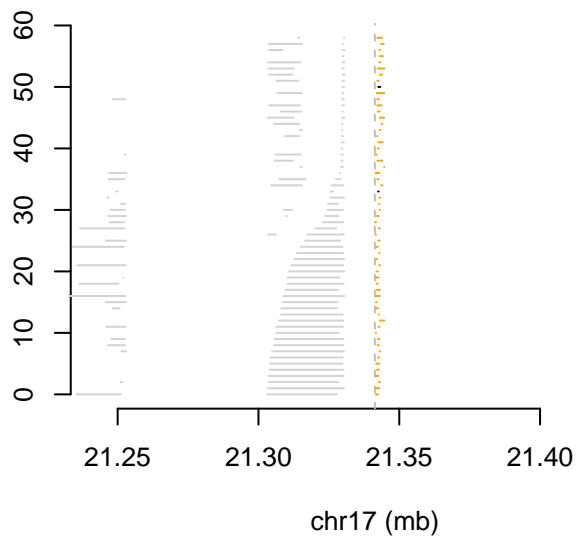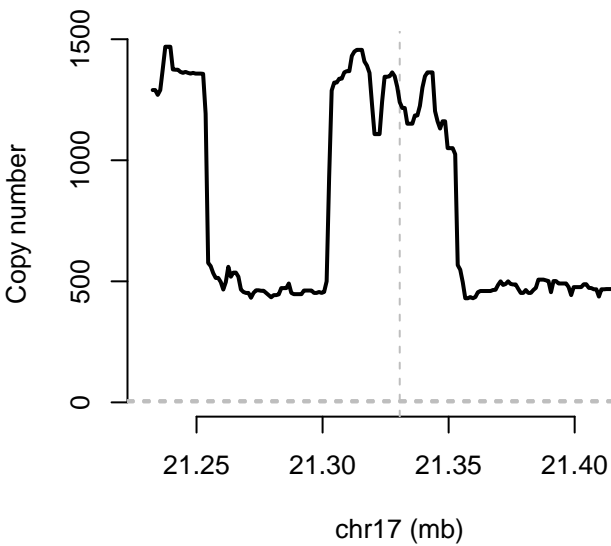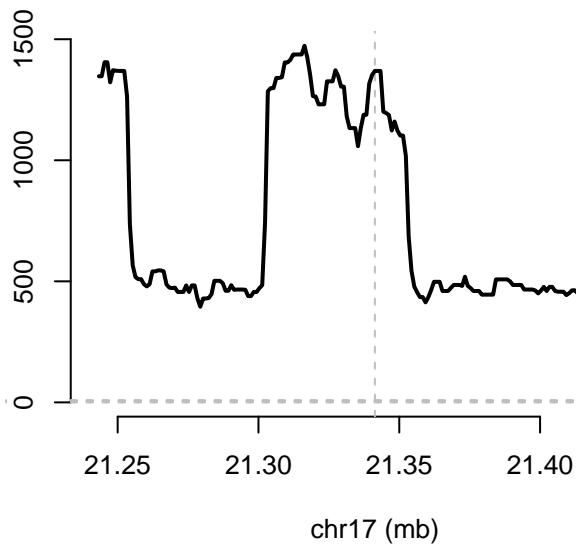

K562 chr17:21,341,337::chr17:21,330,607-+

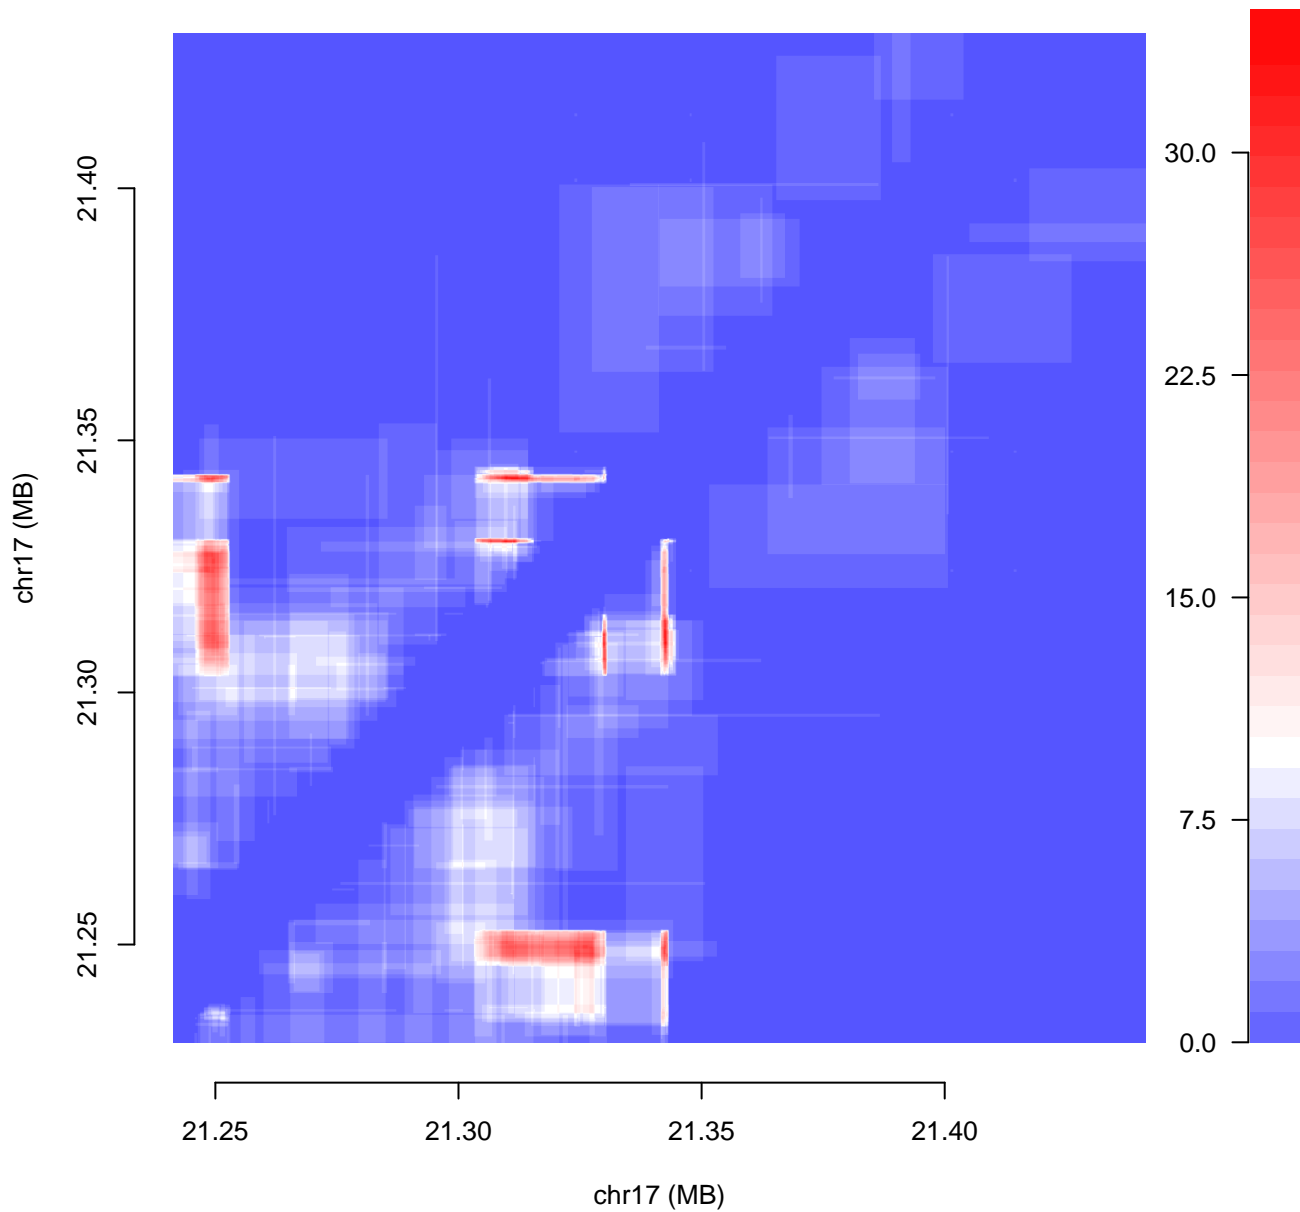

Supplement: Supplemental_Data.zip [file event_198.pdf › event_198.pdf]

Barcode

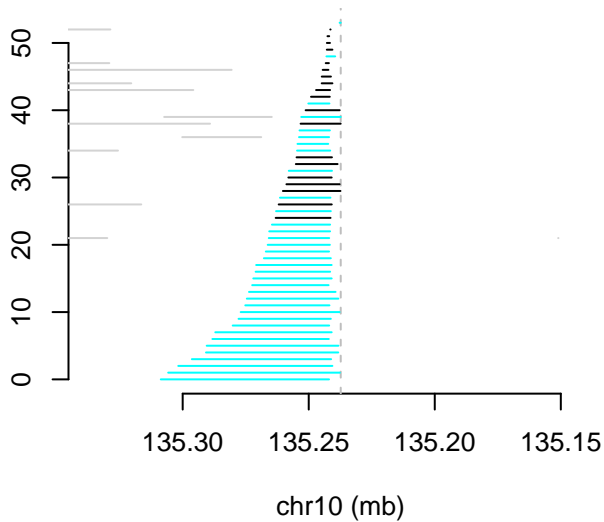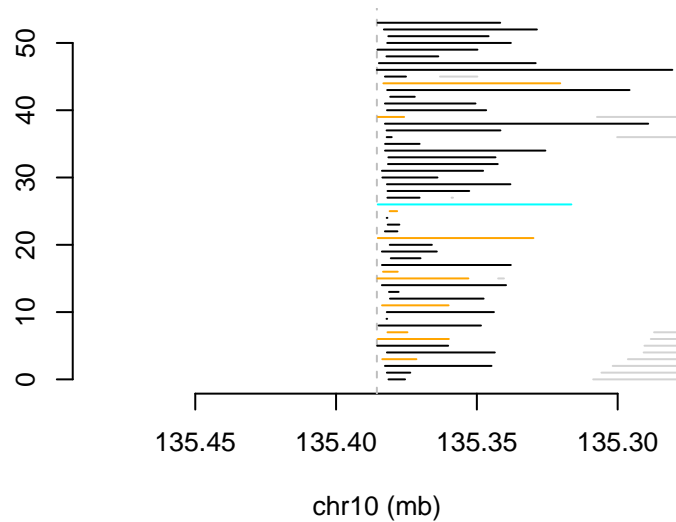

Copy number

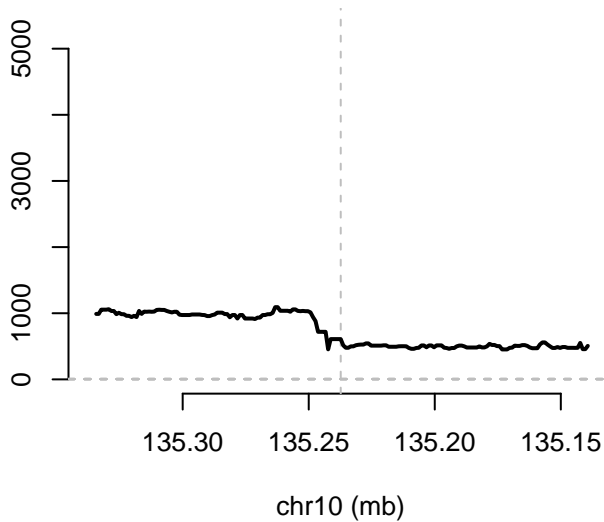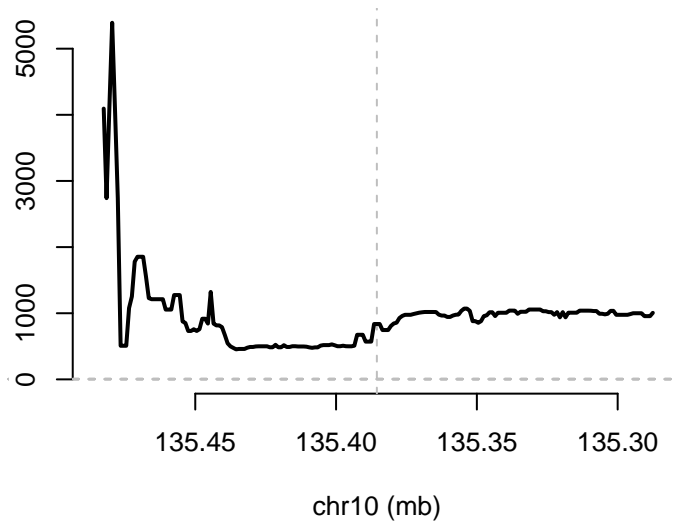

K562 chr10:135,237,298::chr10:135,385,505-+

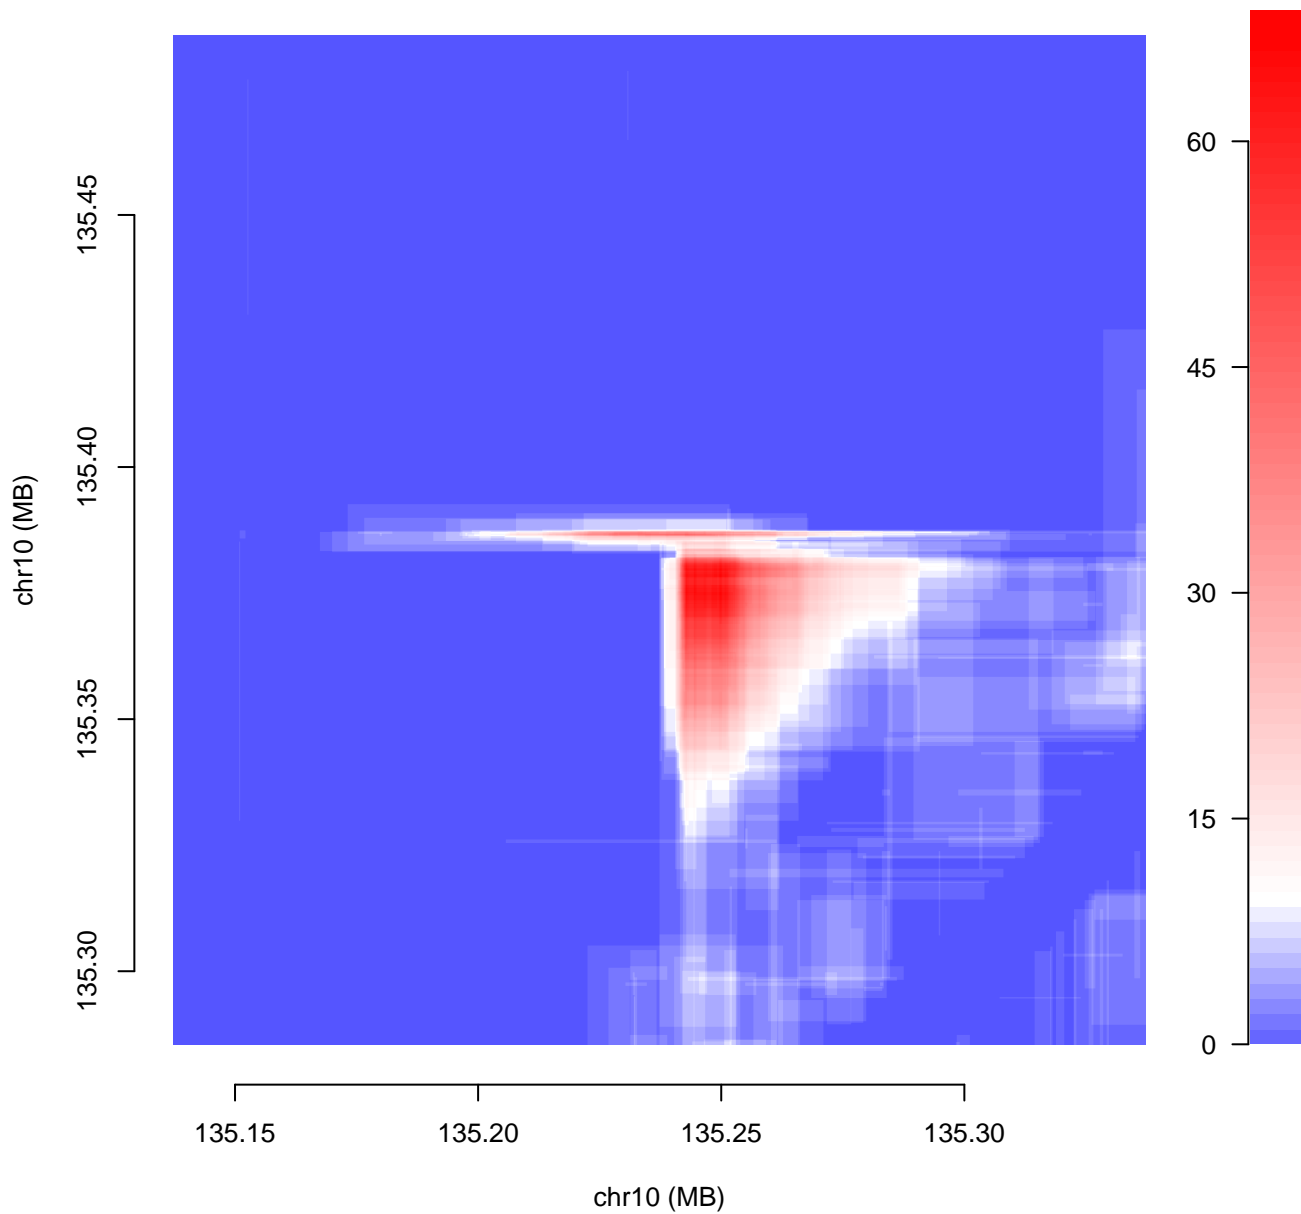

Supplement: Supplemental_Data.zip [file event_199.pdf › event_199.pdf]

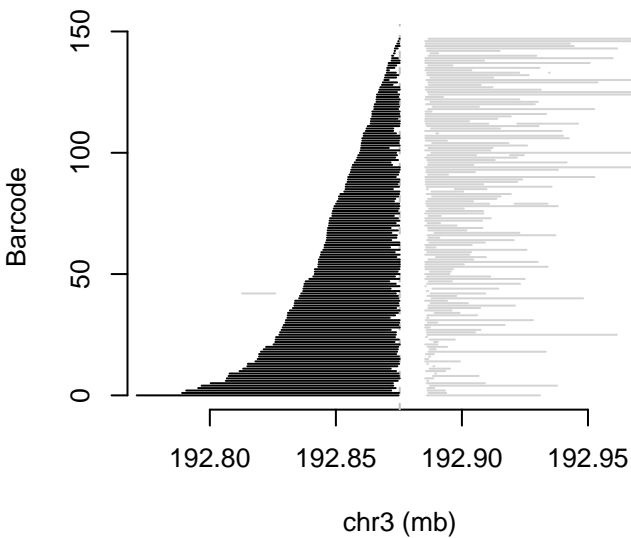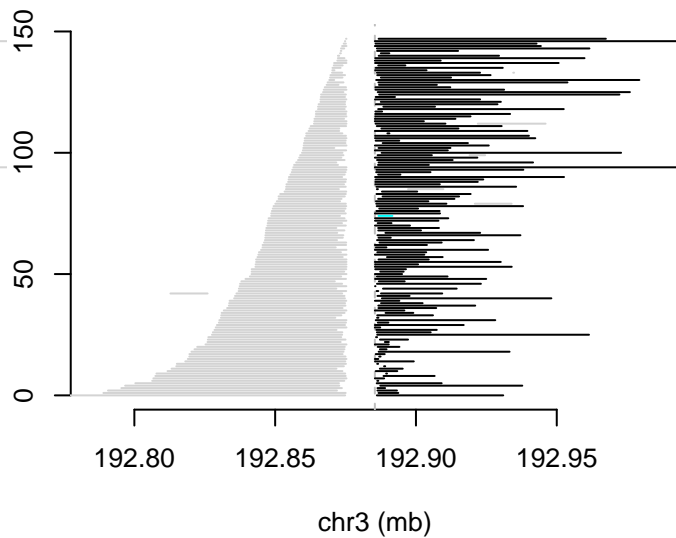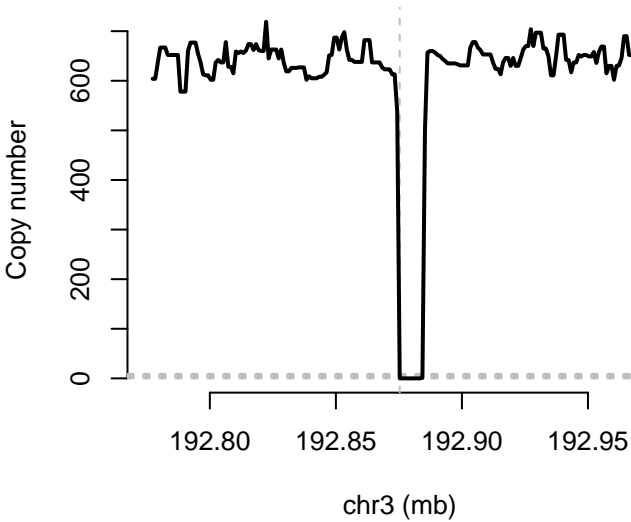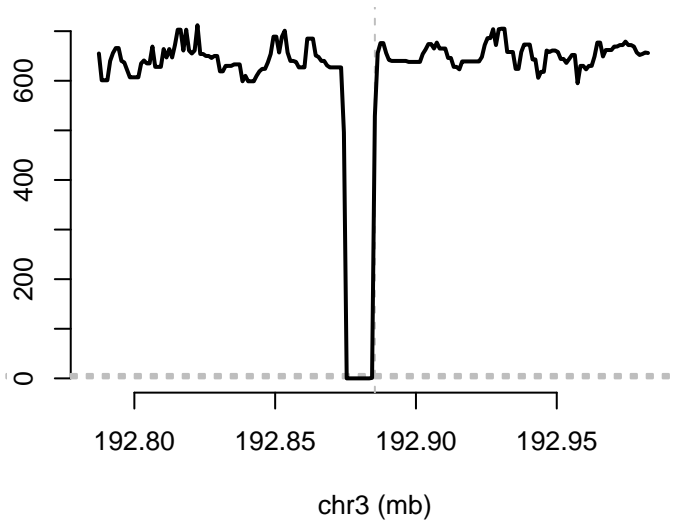

K562 chr3:192,875,332::chr3:192,885,405+-

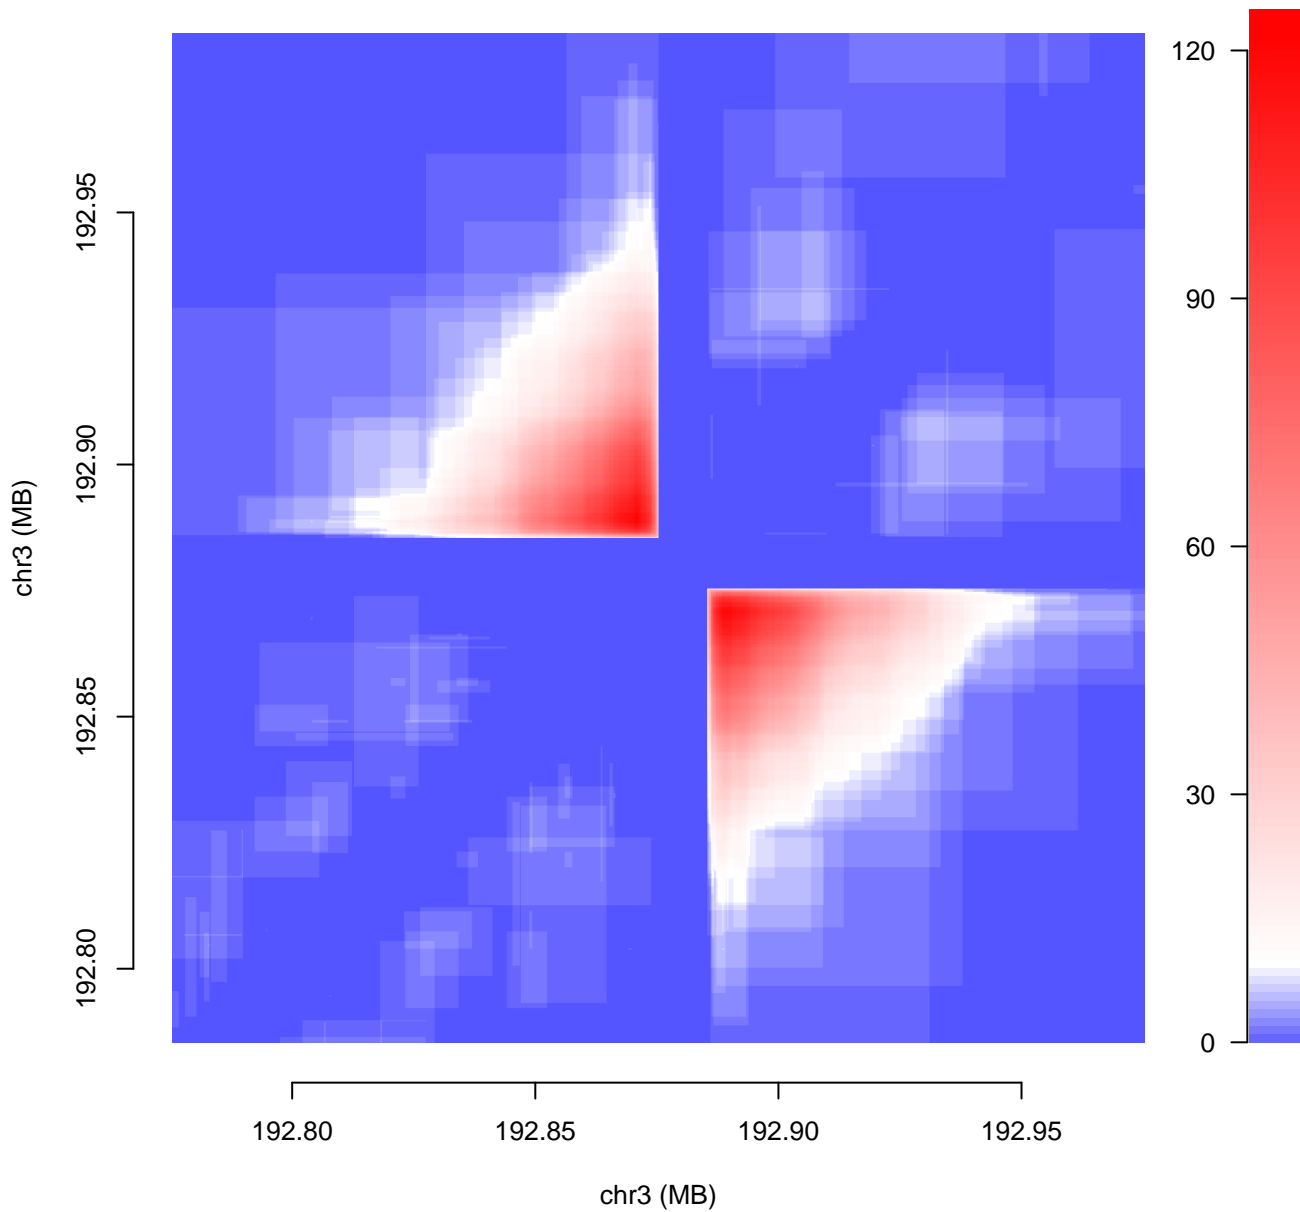

Supplement: Supplemental_Data.zip [file event_2.pdf › event_2.pdf]

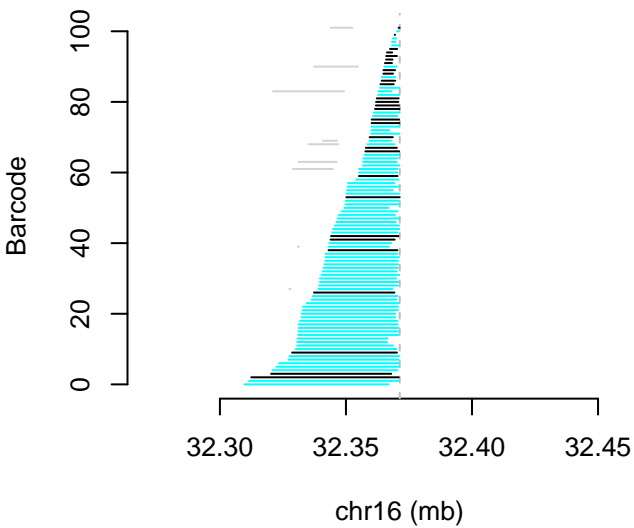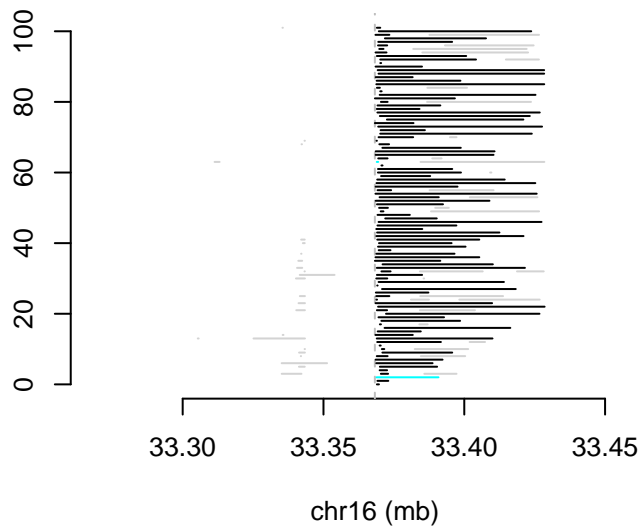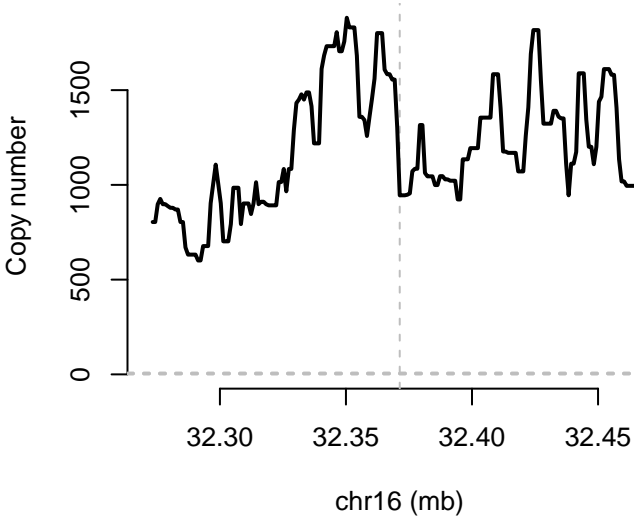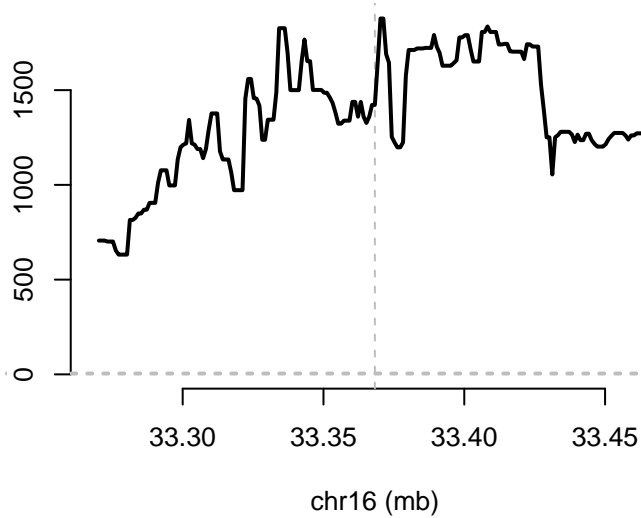

K562 chr16:32,371,336::chr16:33,368,247+-

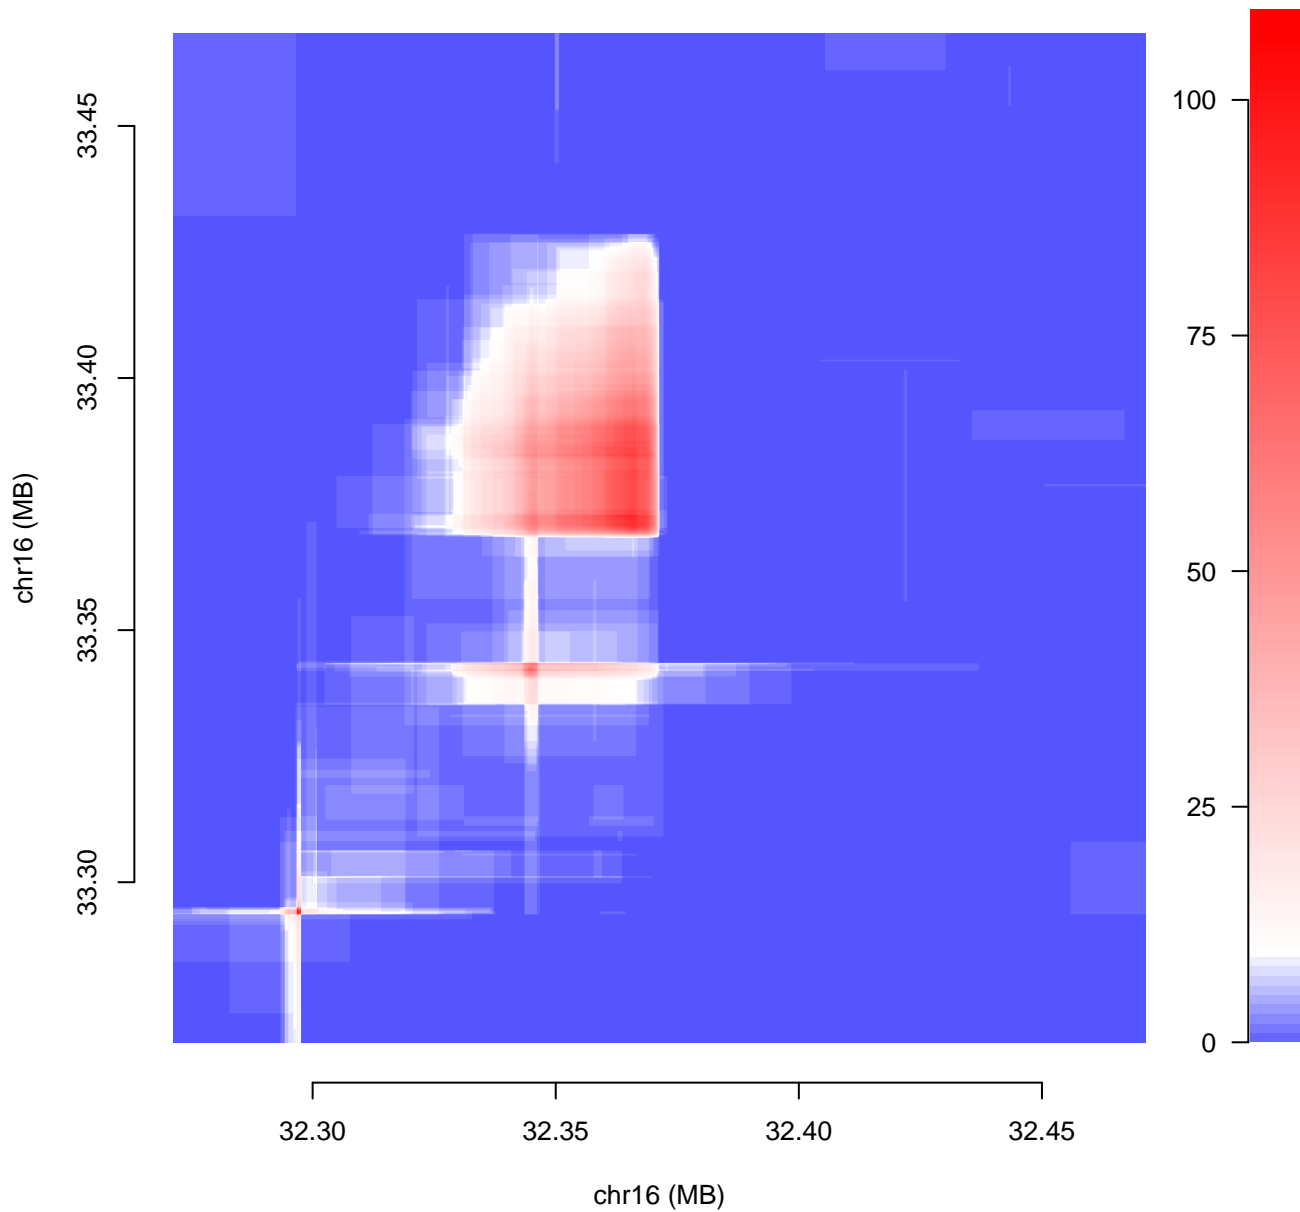

Supplement: Supplemental_Data.zip [file event_20.pdf › event_20.pdf]

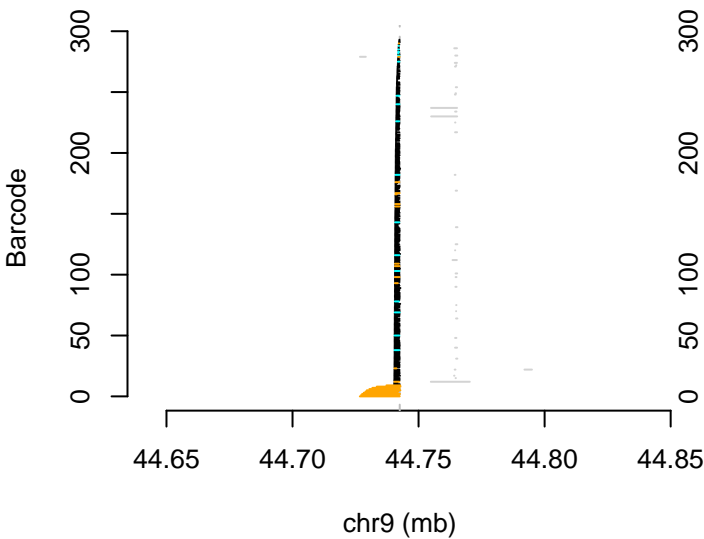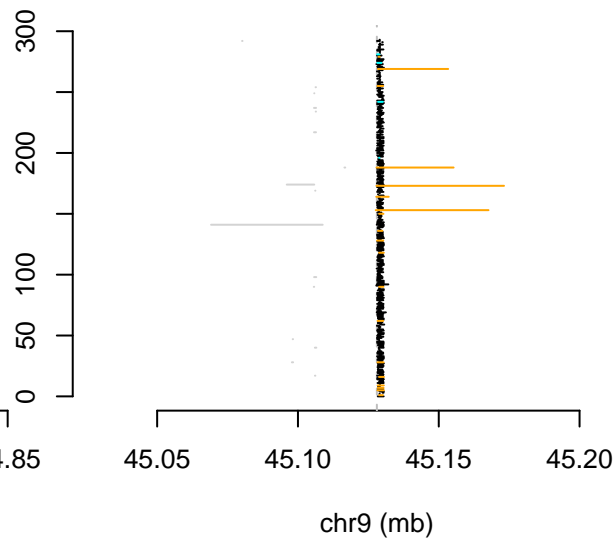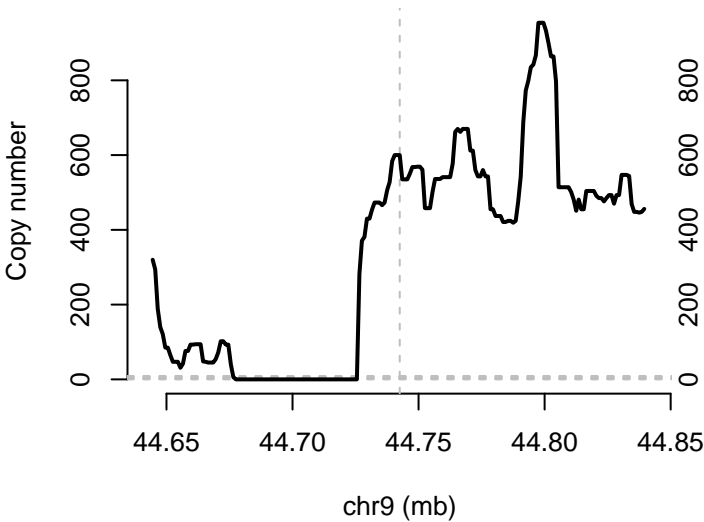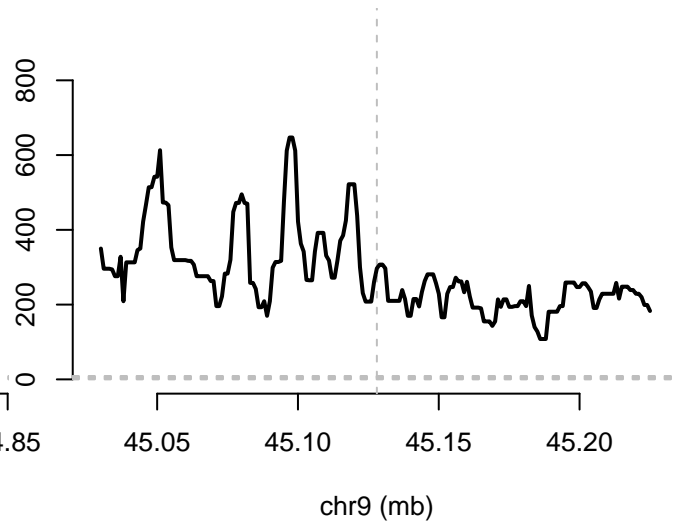

K562 chr9:44,742,532::chr9:45,128,018+-

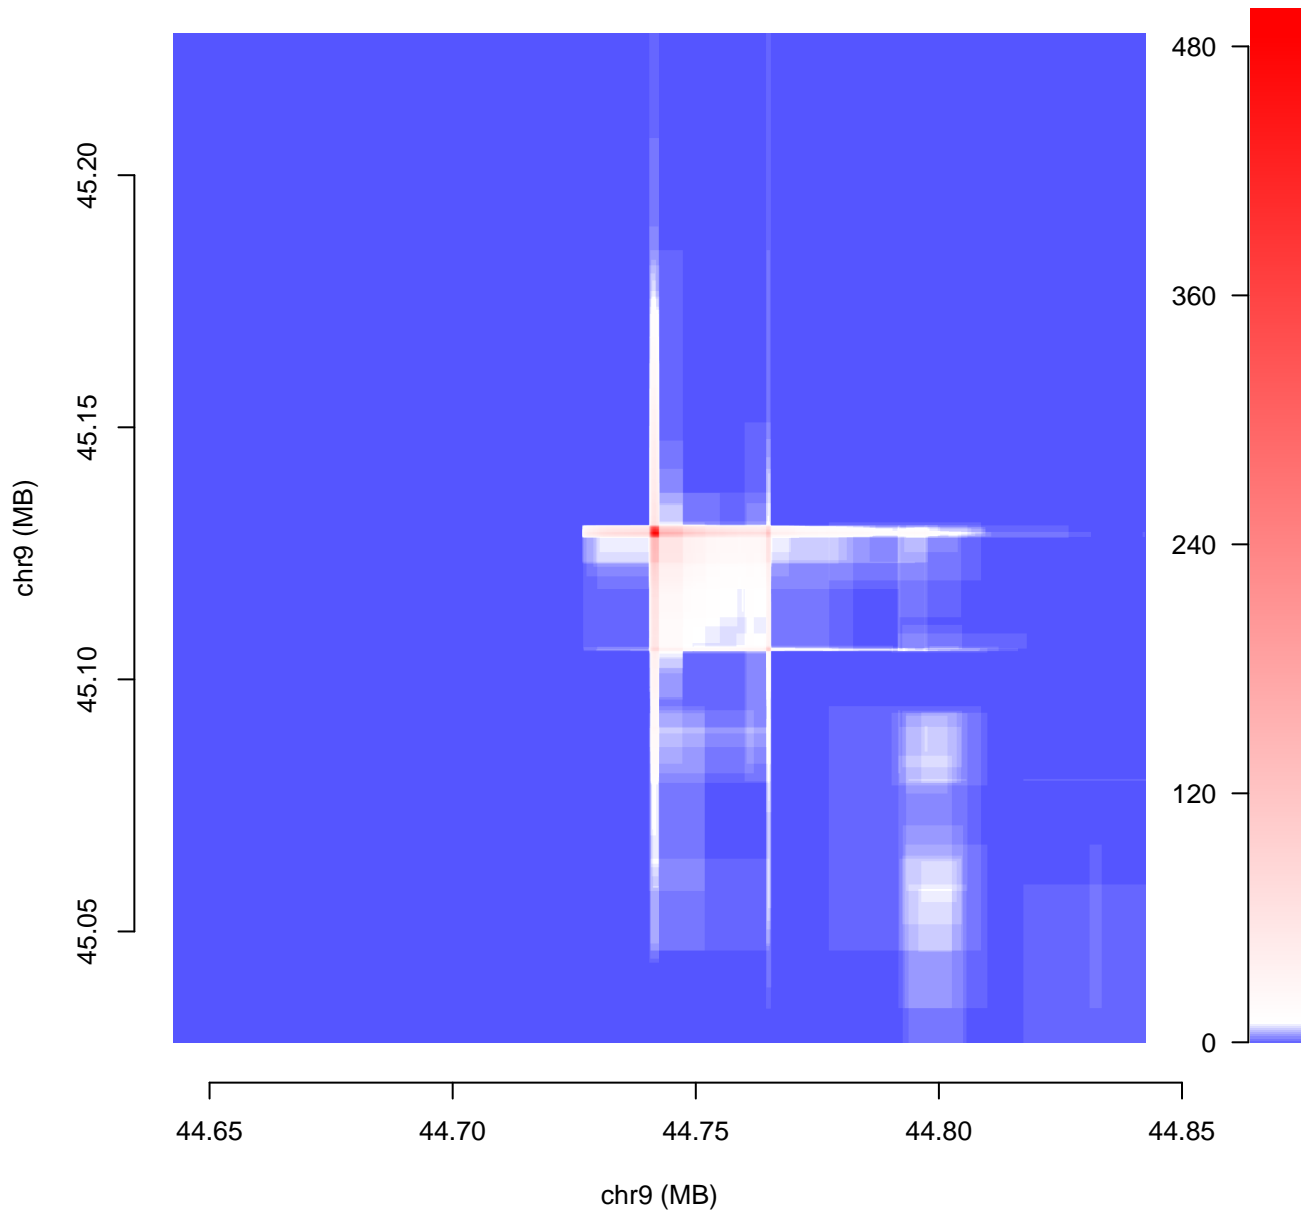

Supplement: Supplemental_Data.zip [file event_200.pdf › event_200.pdf]

Barcode

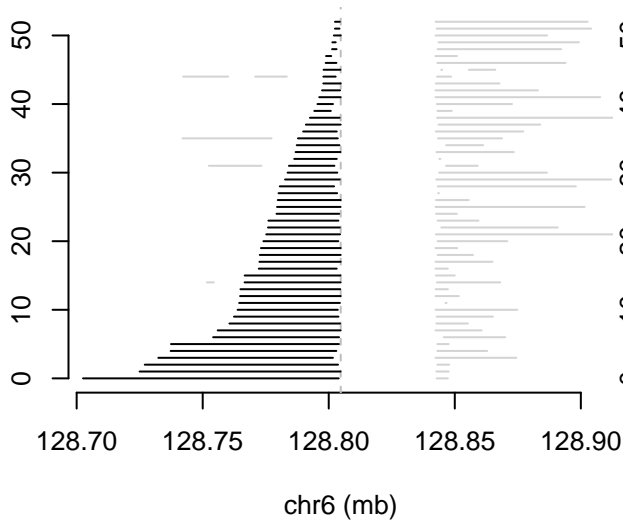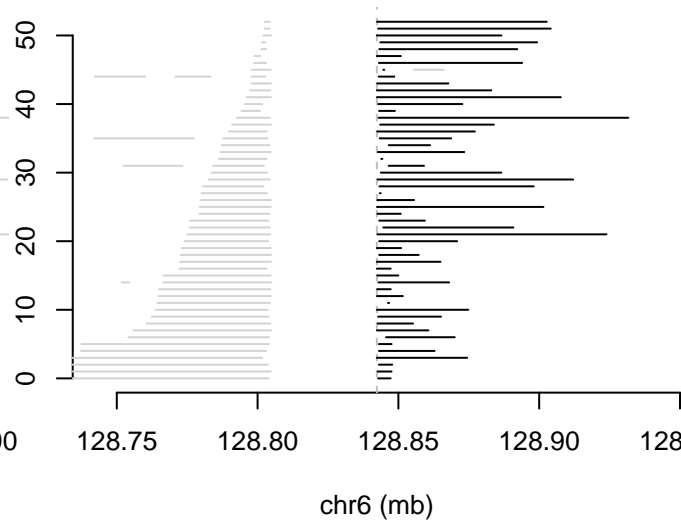

Copy number

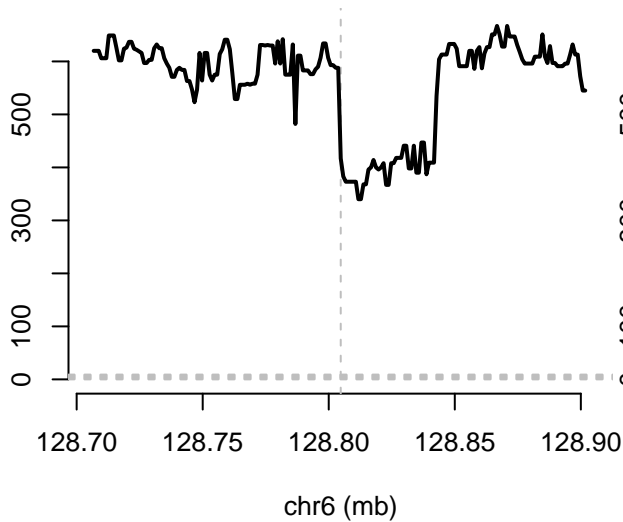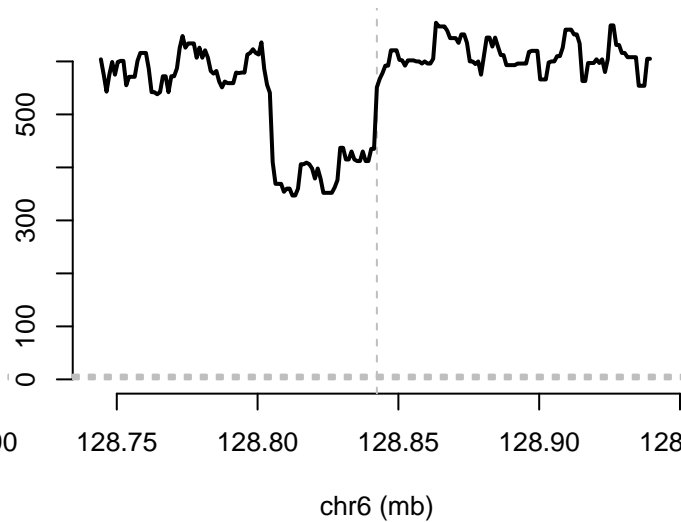

K562 chr6:128,804,762::chr6:128,842,358+-

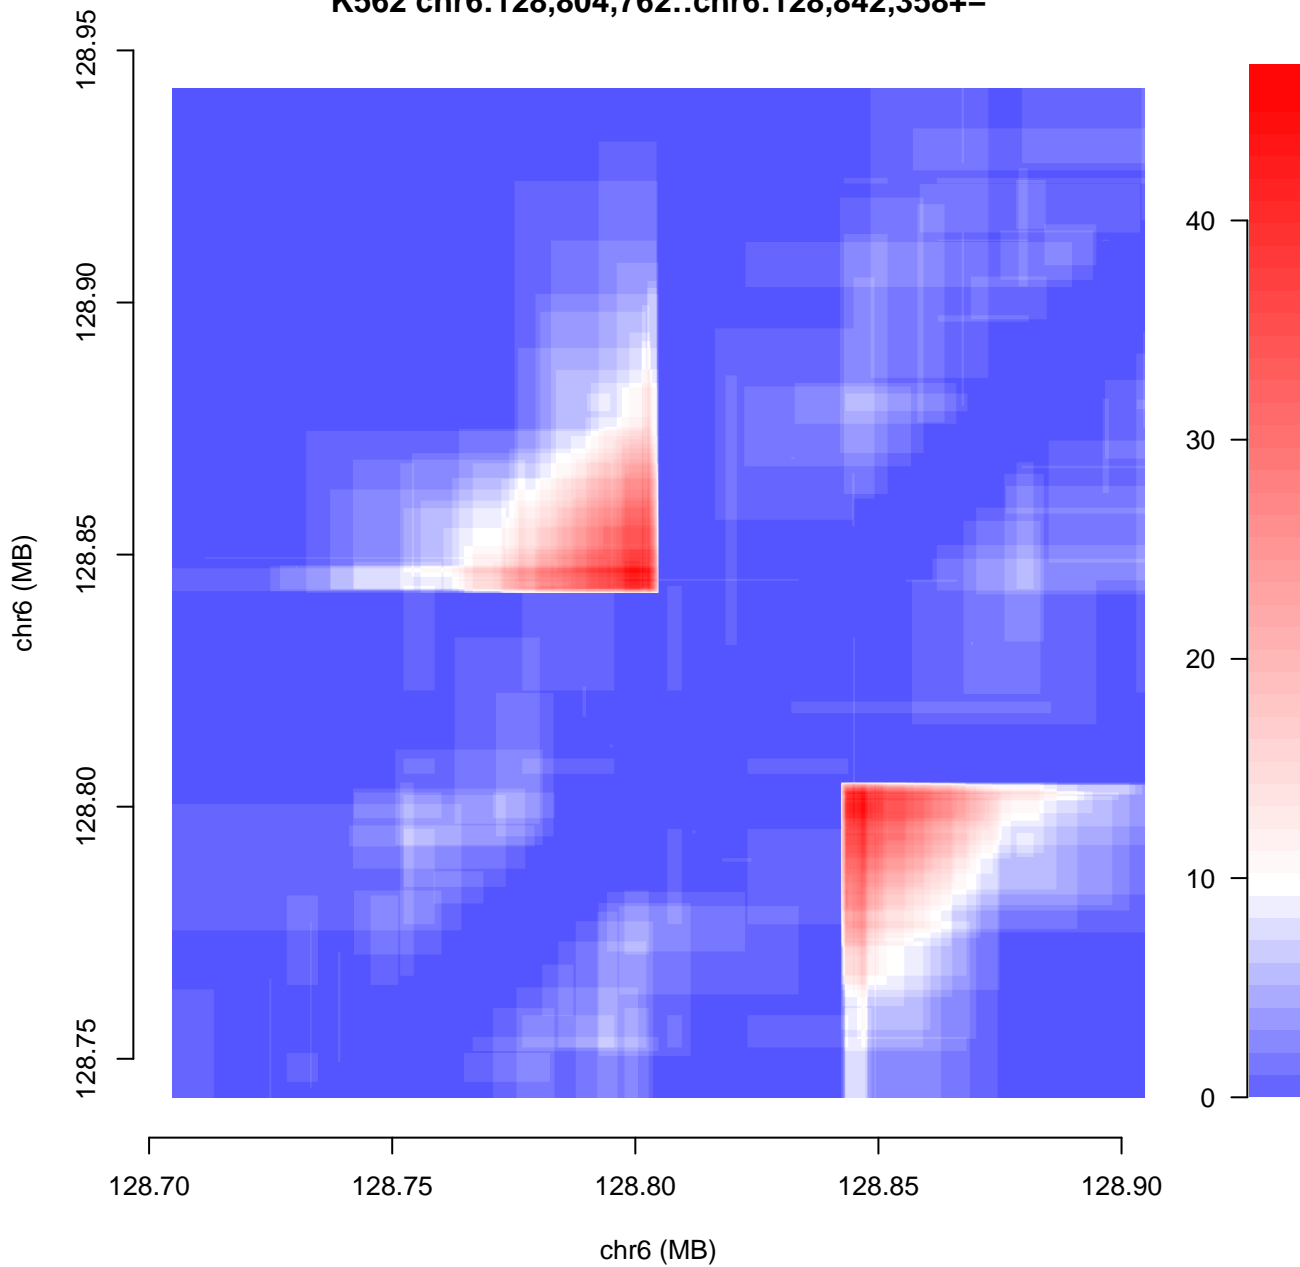

Supplement: Supplemental_Data.zip [file event_201.pdf › event_201.pdf]

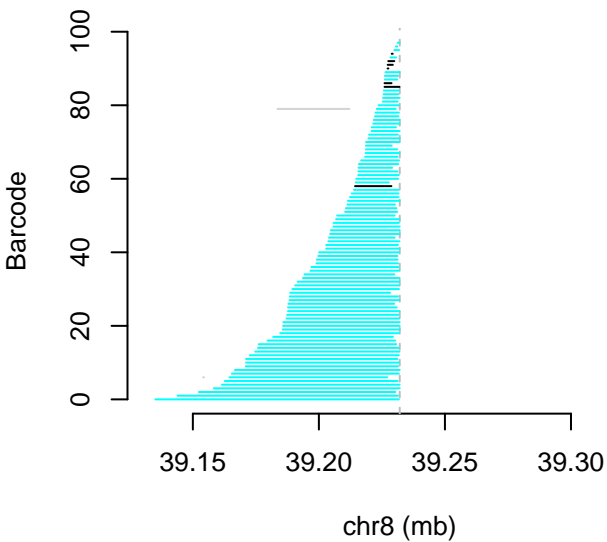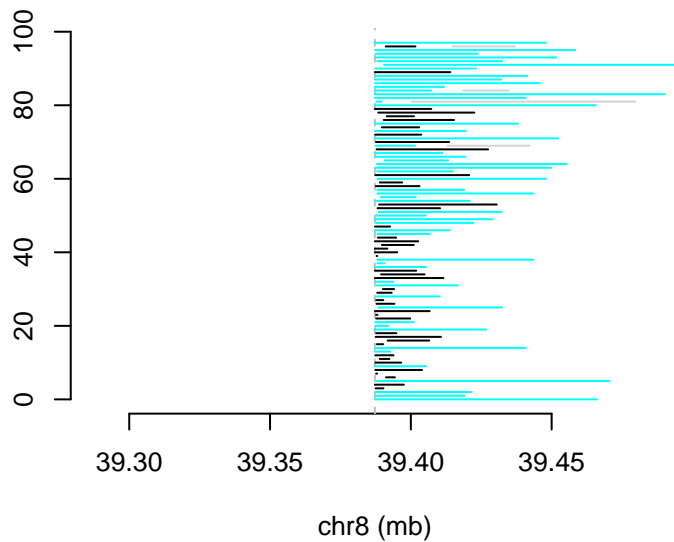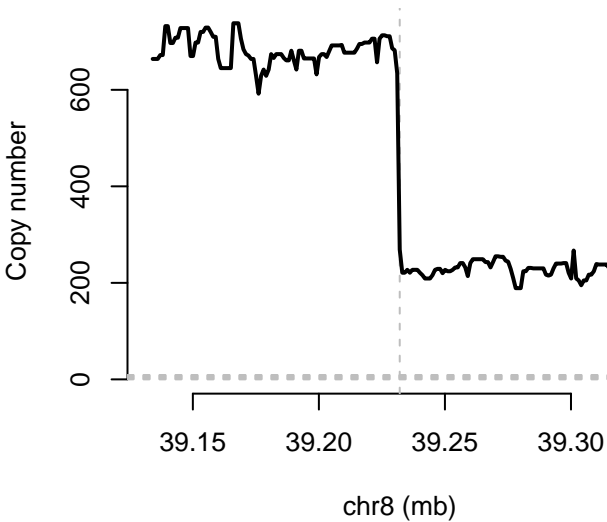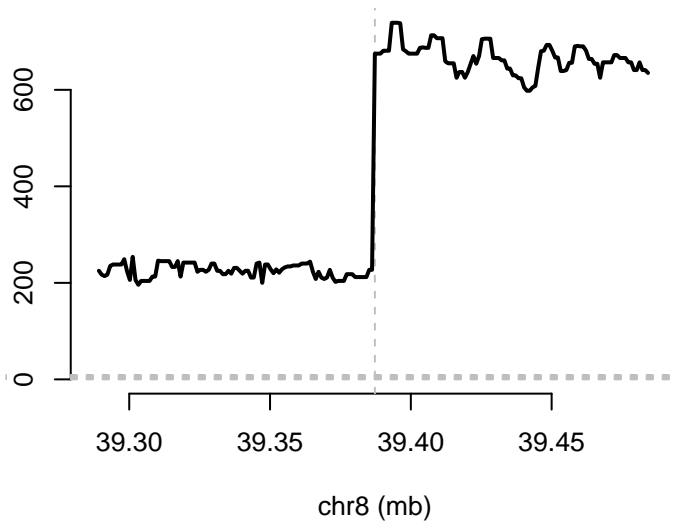

K562 chr8:39,232,074::chr8:39,387,228+-

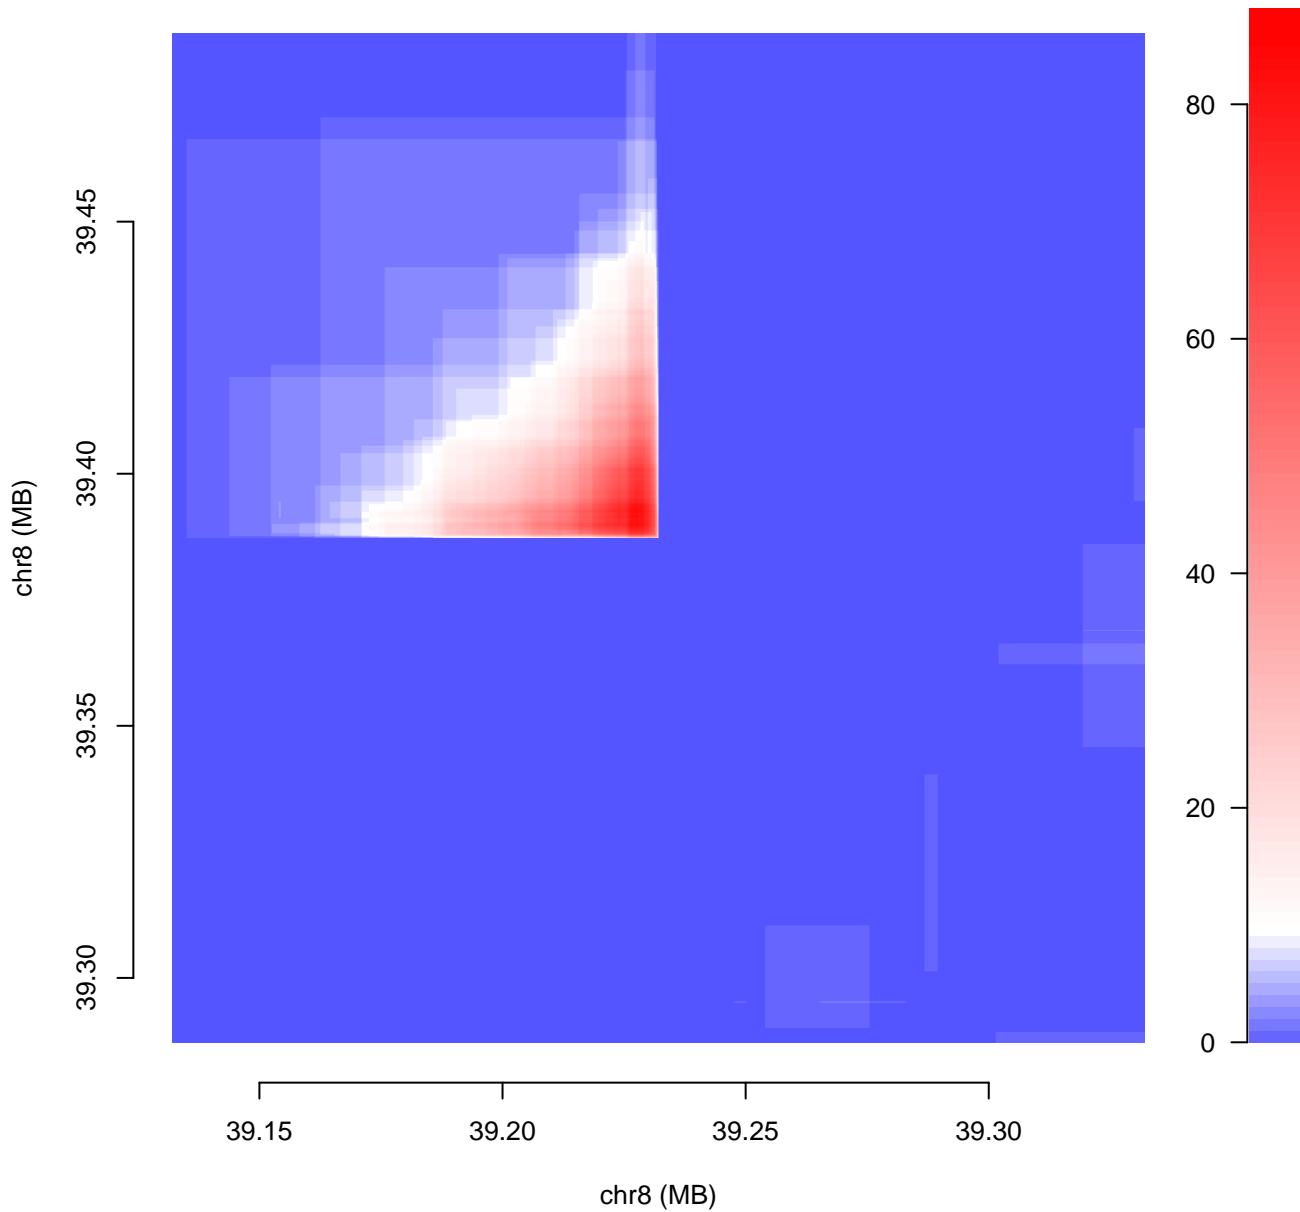

Supplement: Supplemental_Data.zip [file event_202.pdf › event_202.pdf]

Barcode

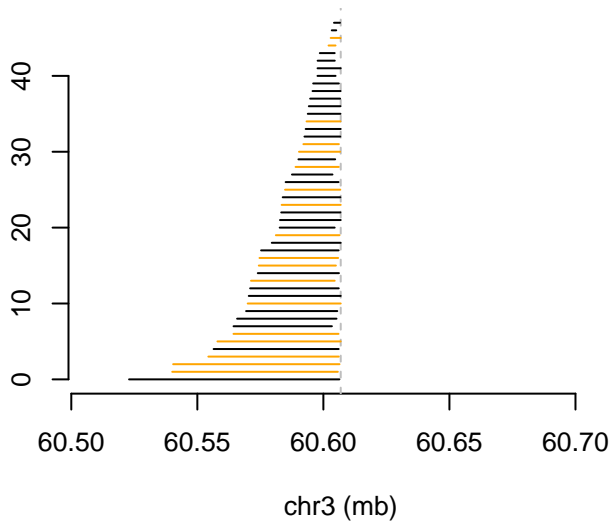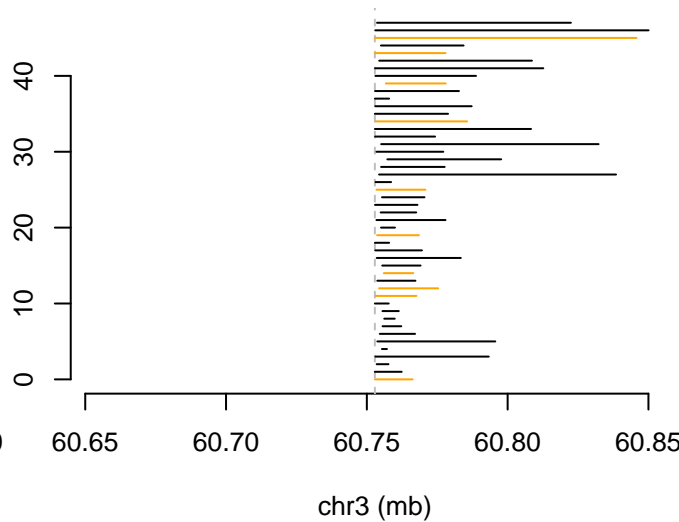

Copy number

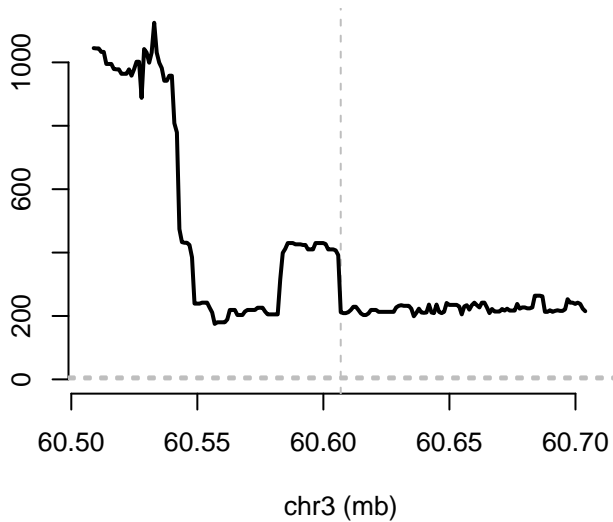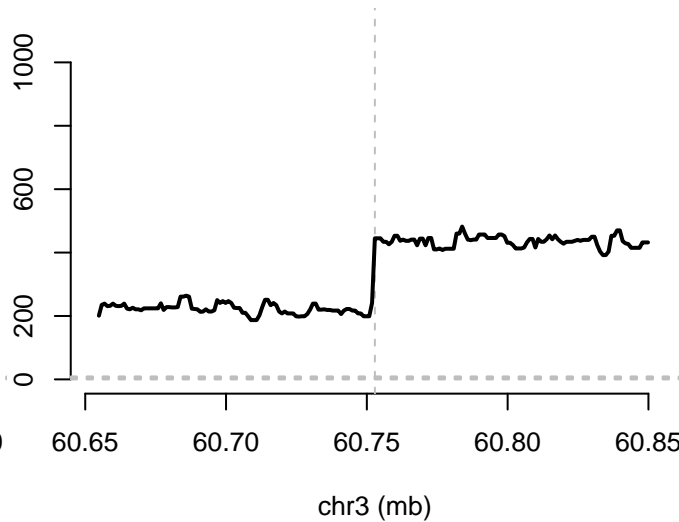

K562 chr3:60,752,850::chr3:60,606,886--+

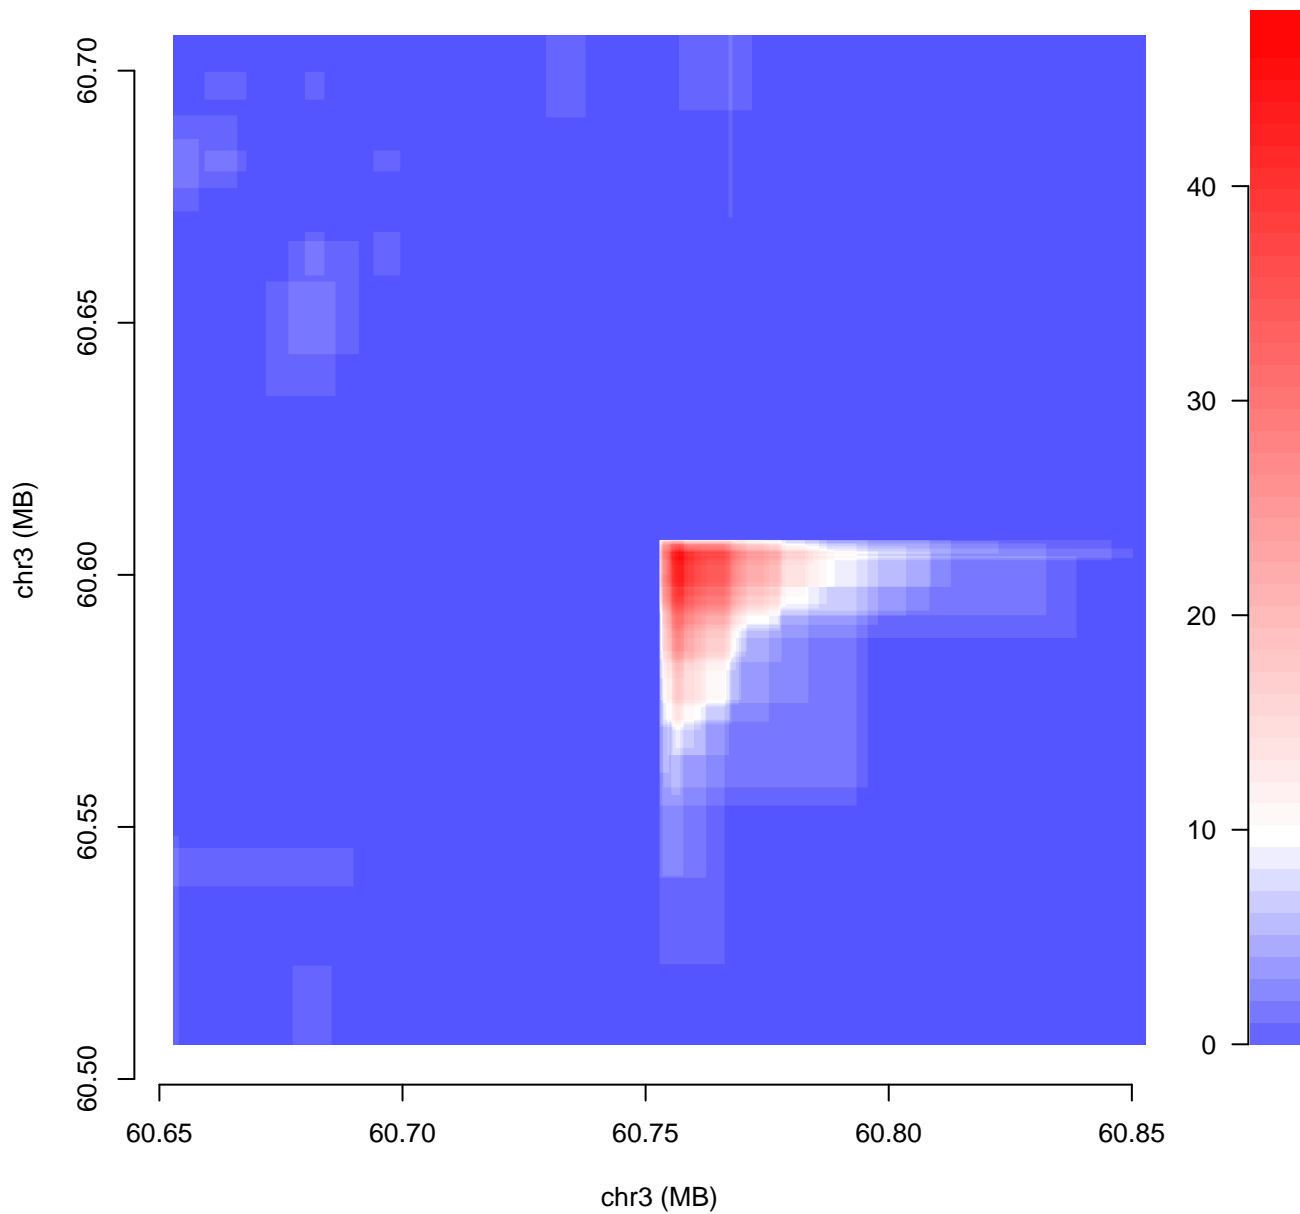

Supplement: Supplemental_Data.zip [file event_203.pdf › event_203.pdf]

Barcode

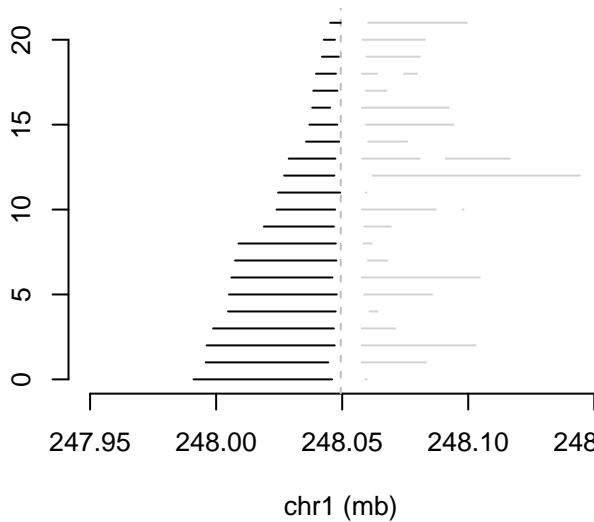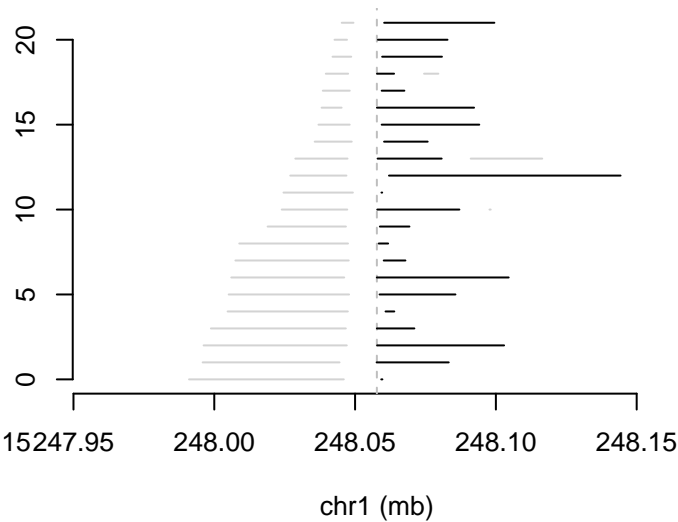

Copy number

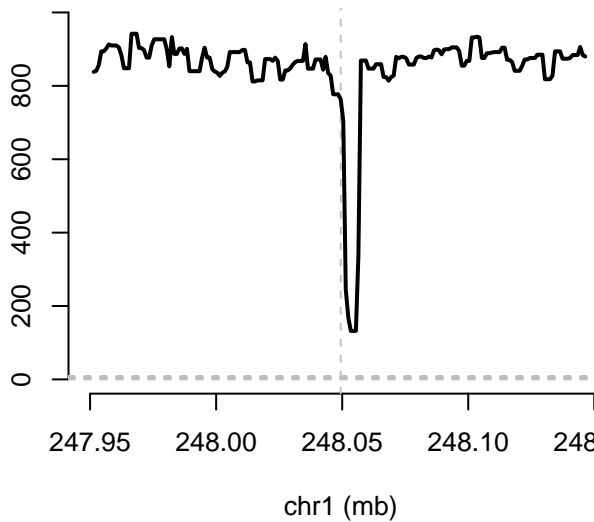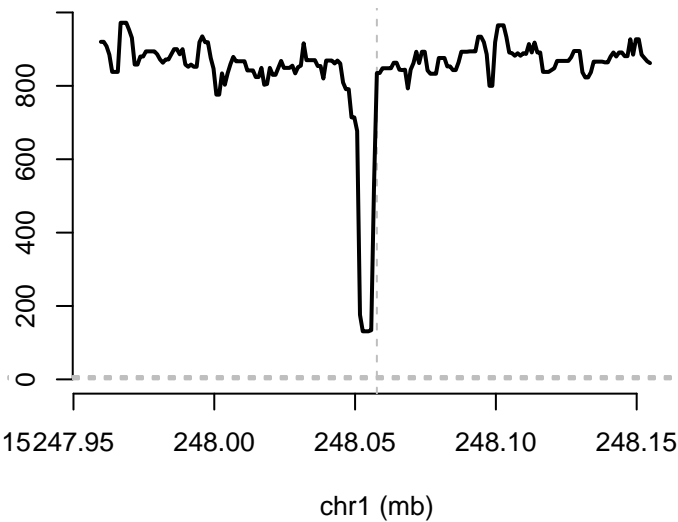

K562 chr1:248,057,735::chr1:248,049,426-+

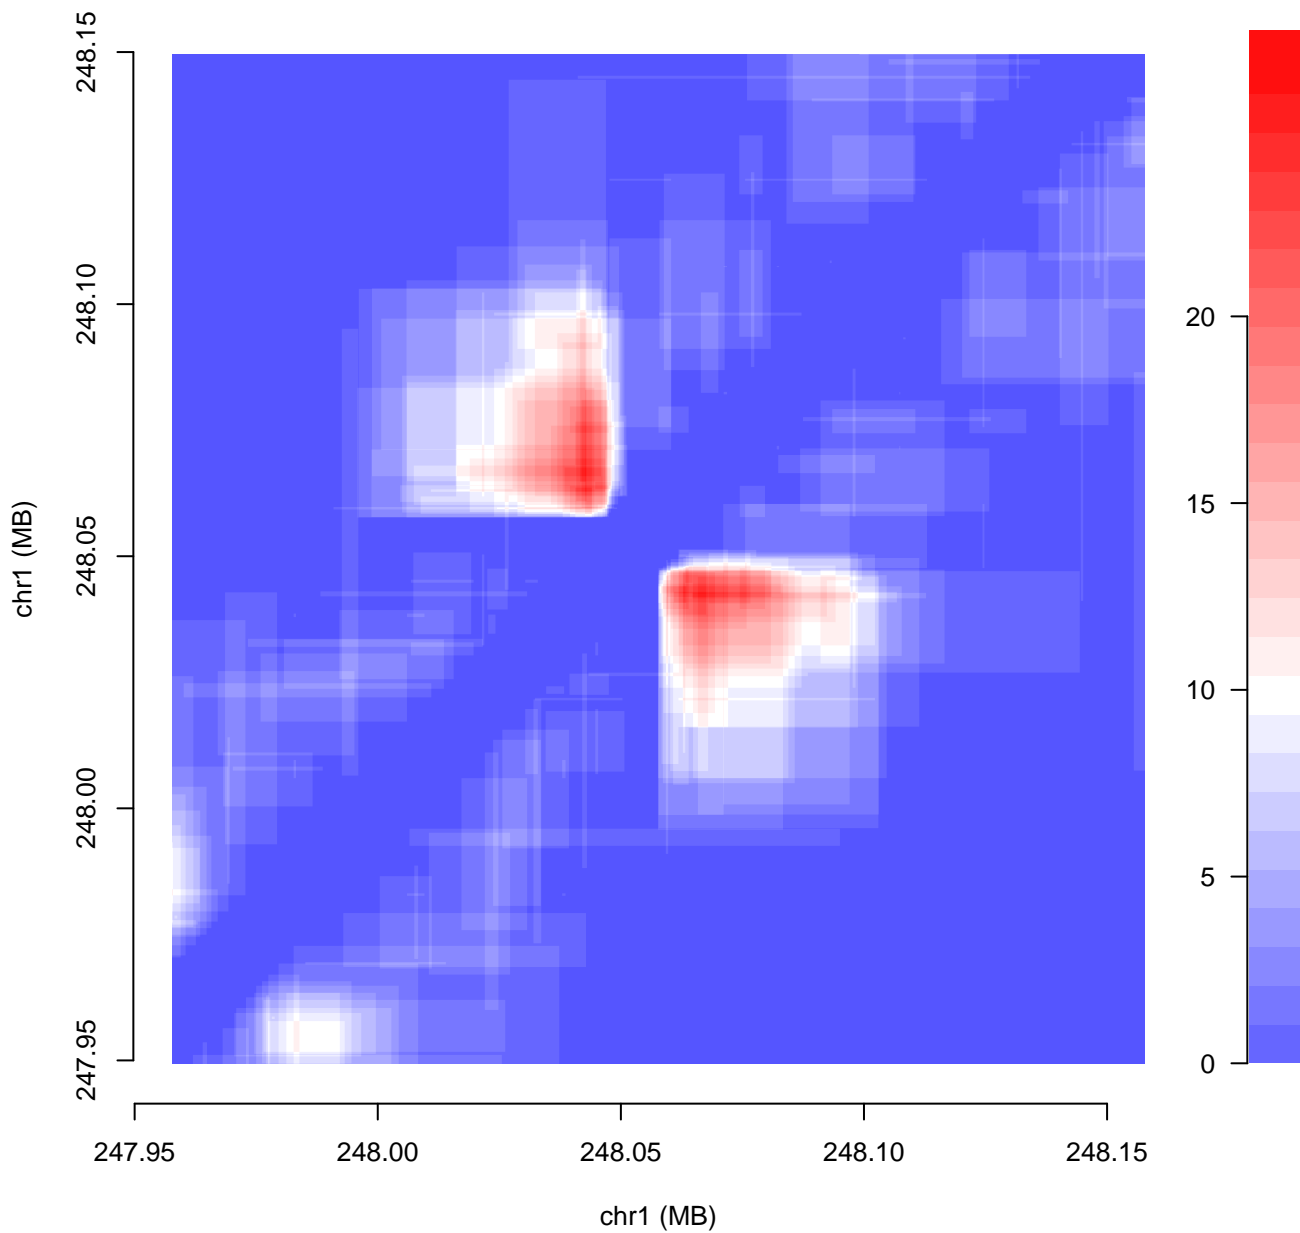

Supplement: Supplemental_Data.zip [file event_204.pdf › event_204.pdf]

Barcode

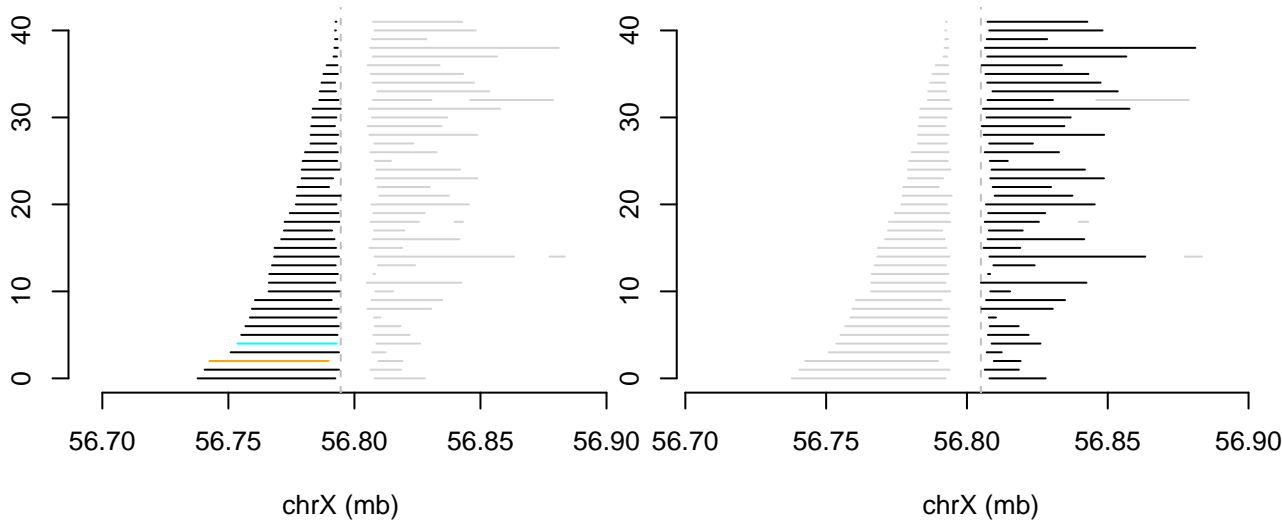

Copy number

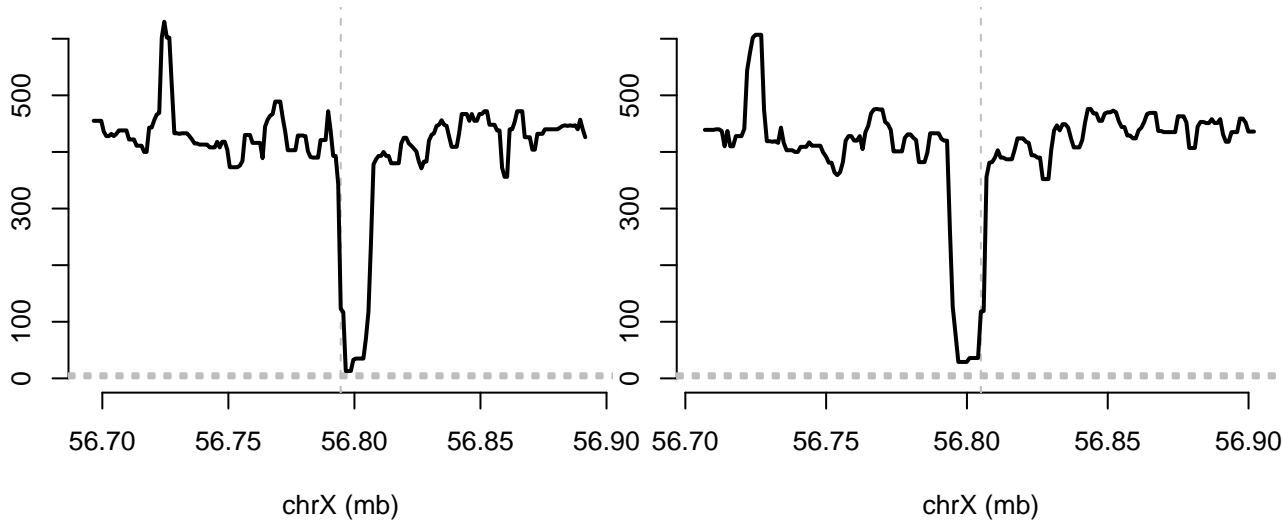

K562 chrX:56,794,570::chrX:56,804,949+-

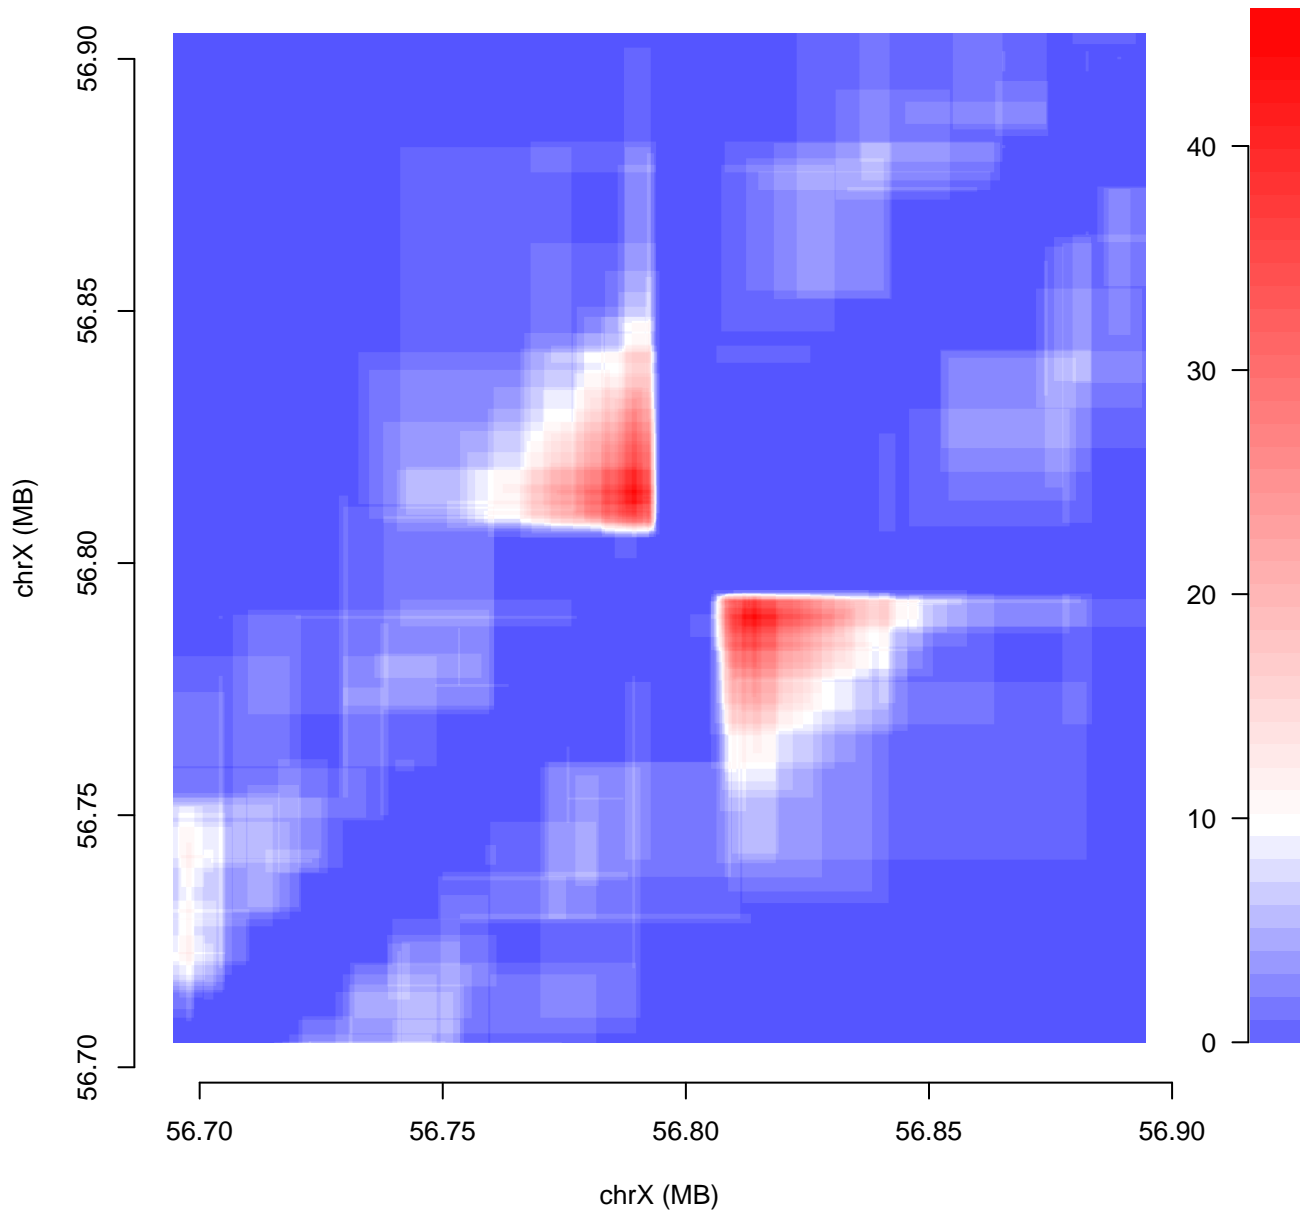

Supplement: Supplemental_Data.zip [file event_205.pdf › event_205.pdf]

Barcode

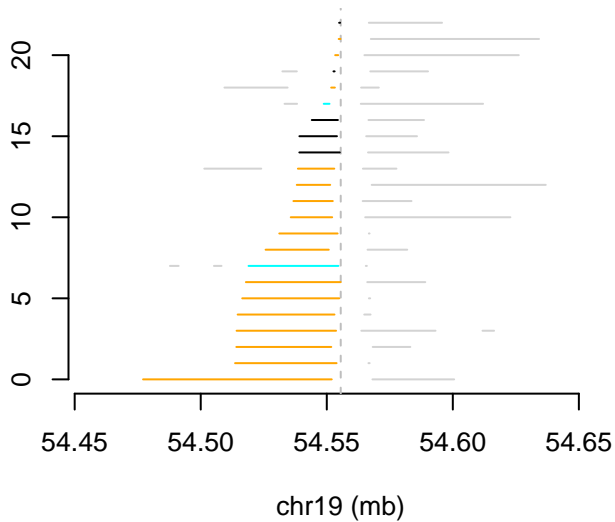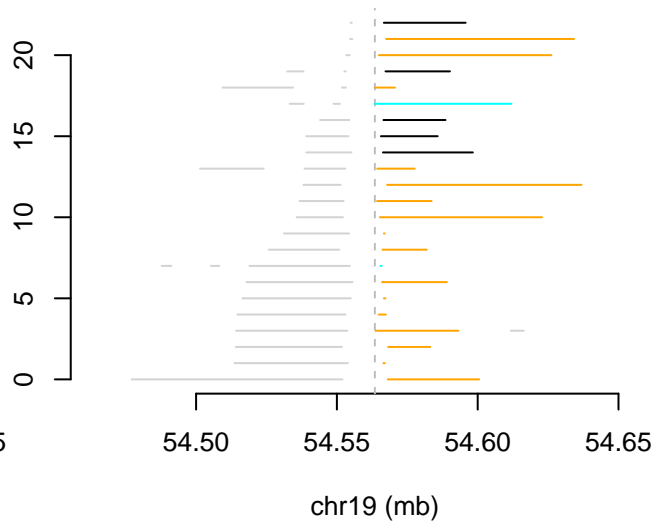

Copy number

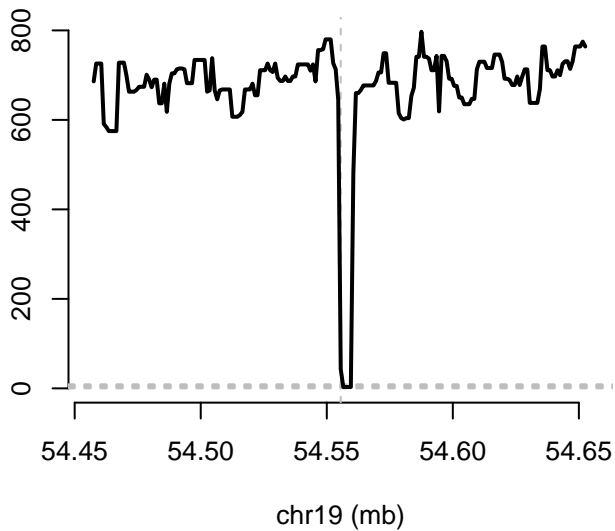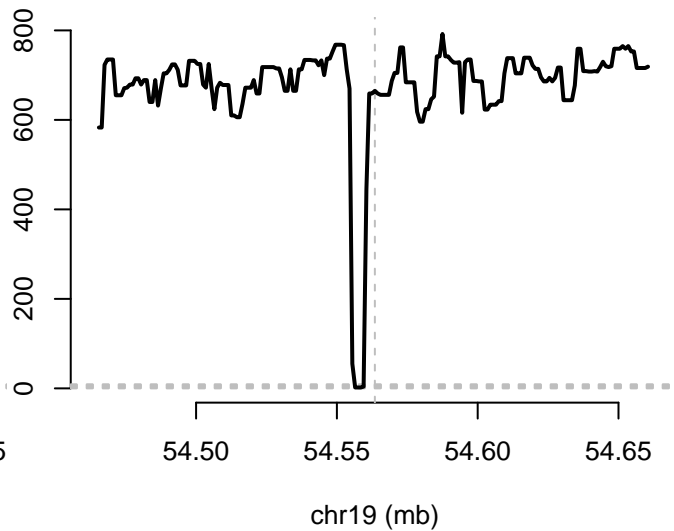

K562 chr19:54,563,487::chr19:54,555,540-+

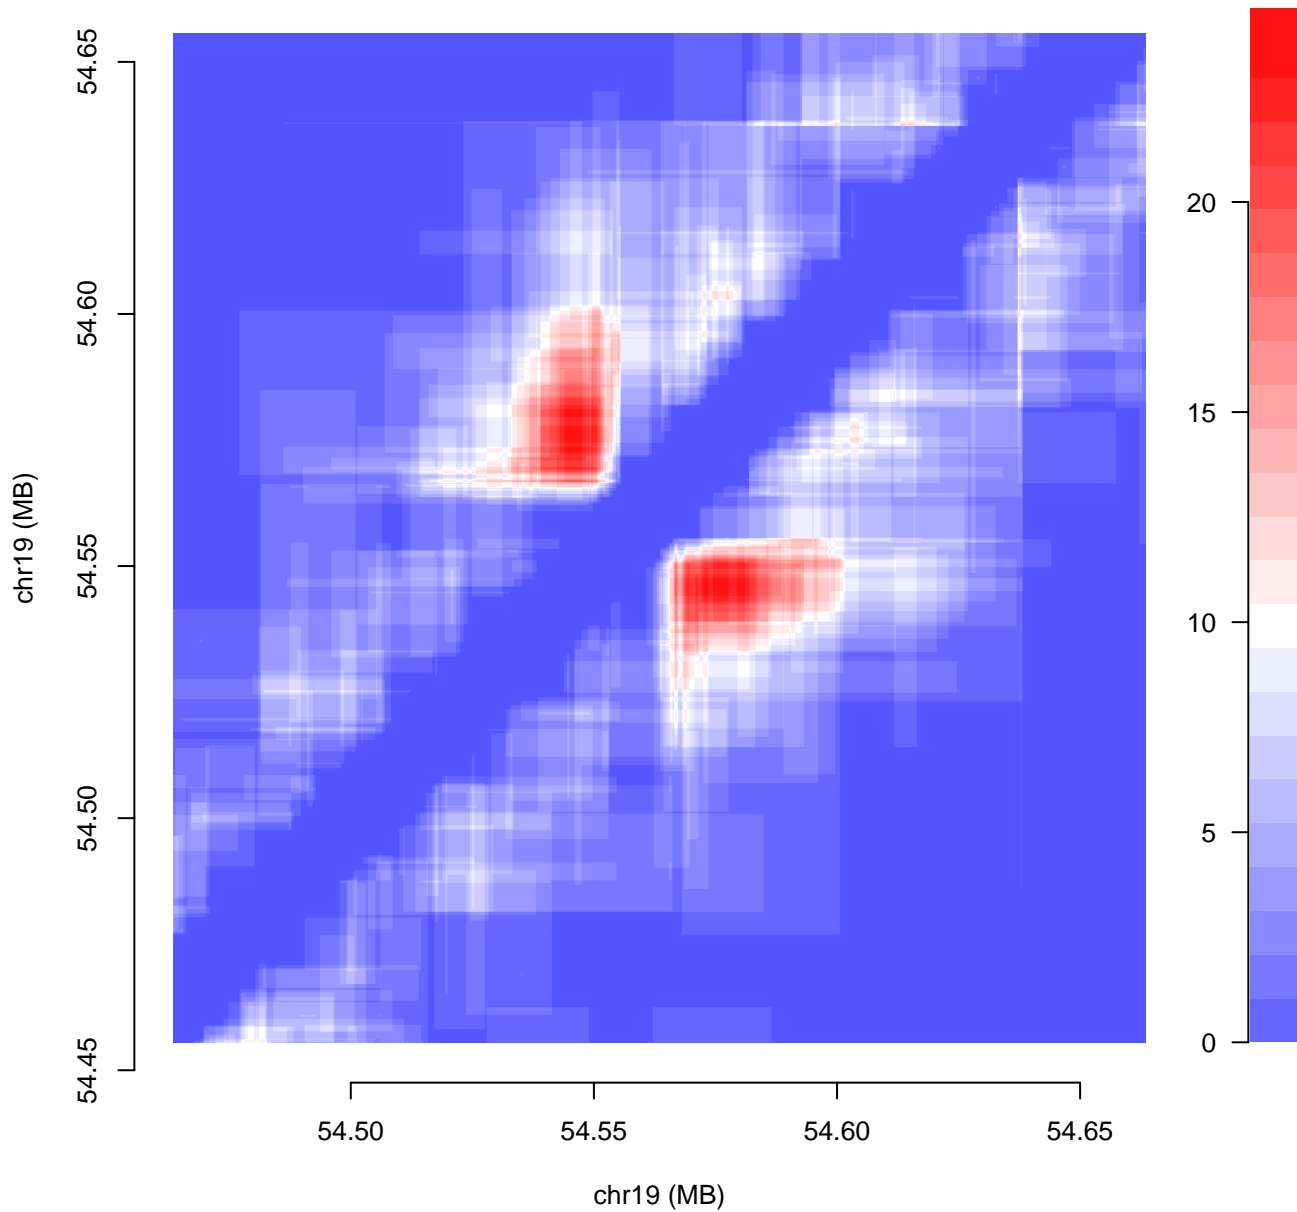

Supplement: Supplemental_Data.zip [file event_206.pdf › event_206.pdf]

Barcode

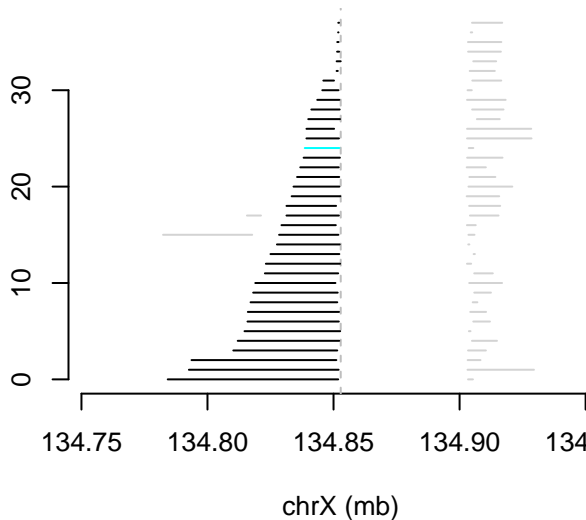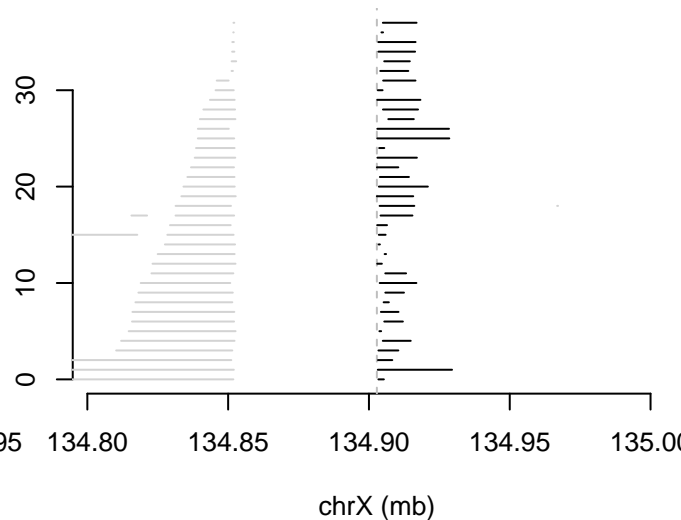

Copy number

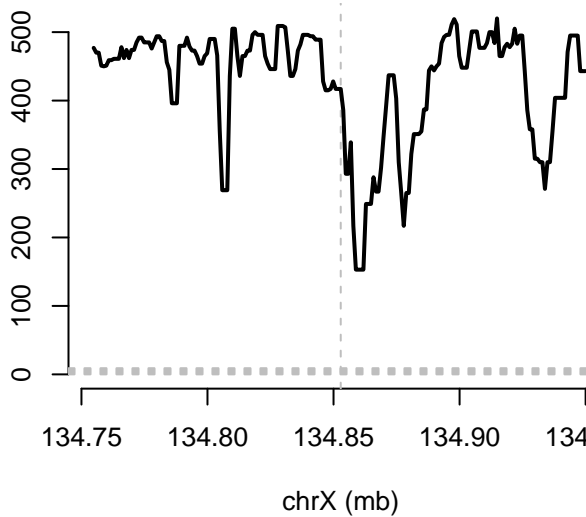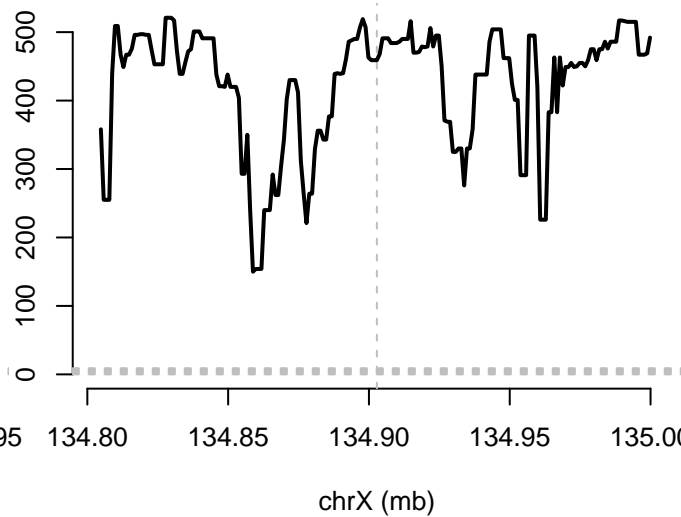

K562 chrX:134,852,860::chrX:134,902,814+-

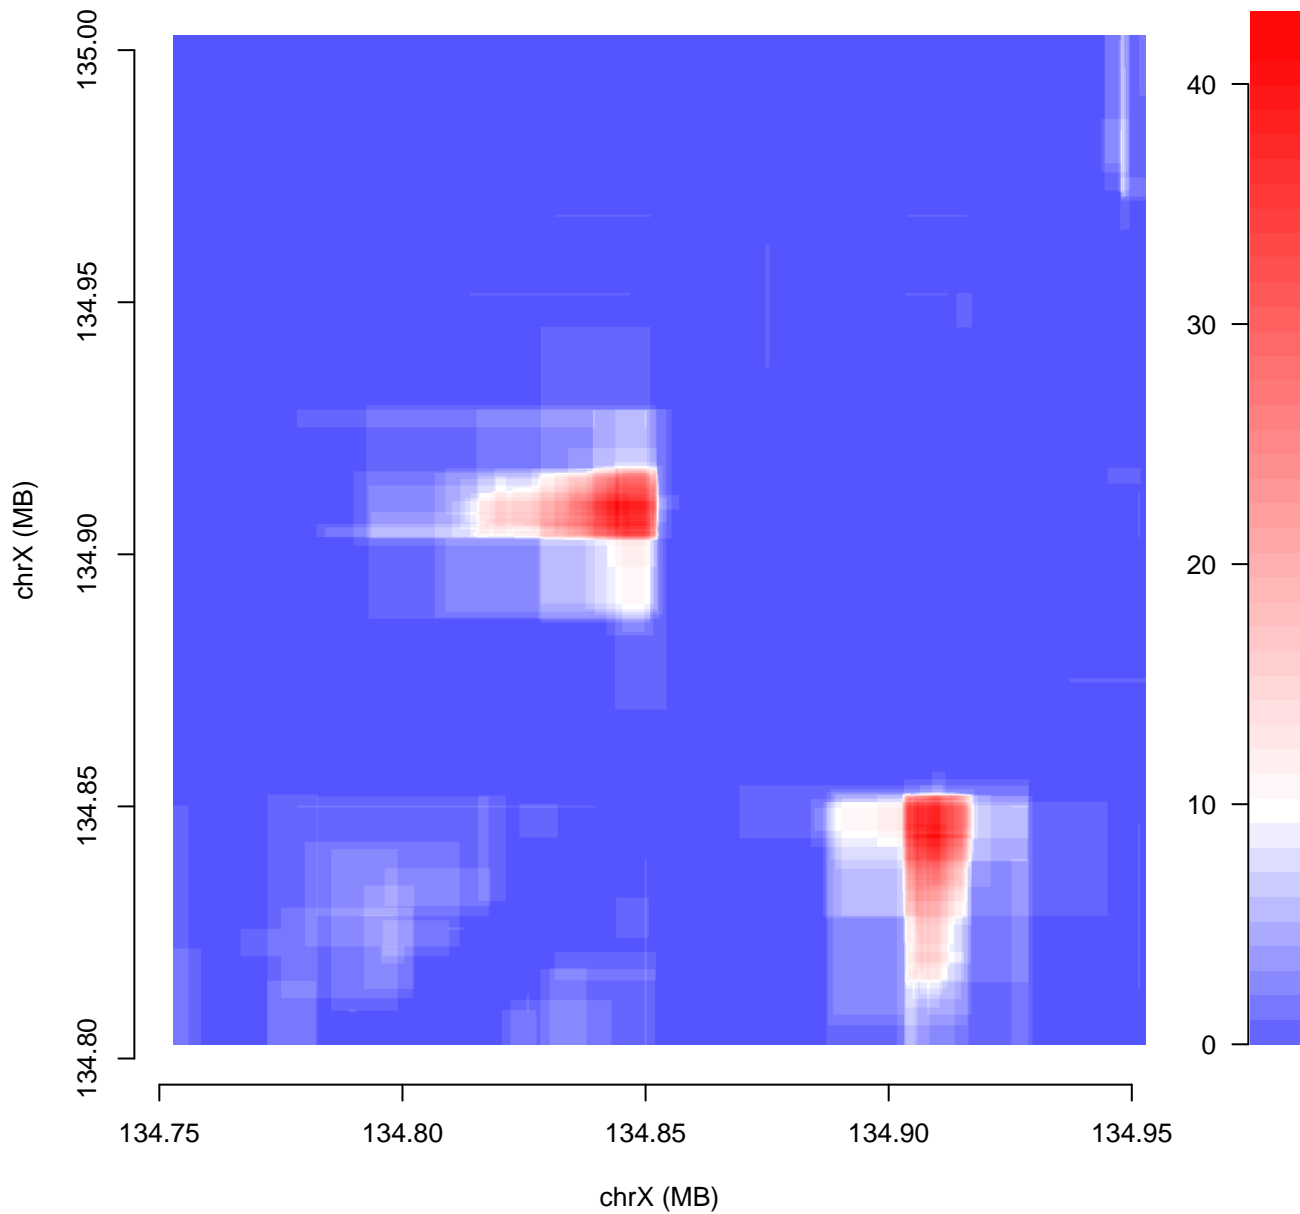

Supplement: Supplemental_Data.zip [file event_207.pdf › event_207.pdf]

Barcode

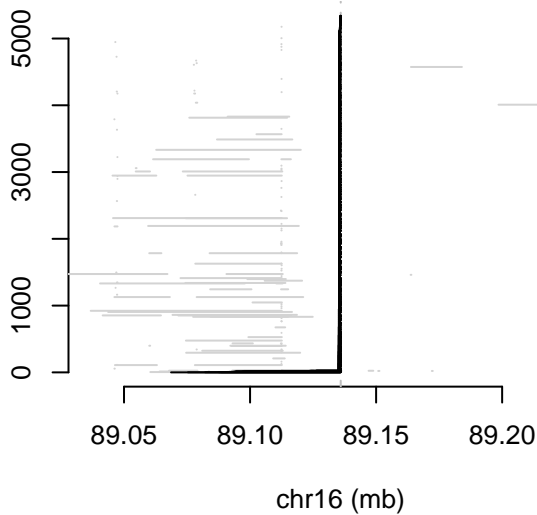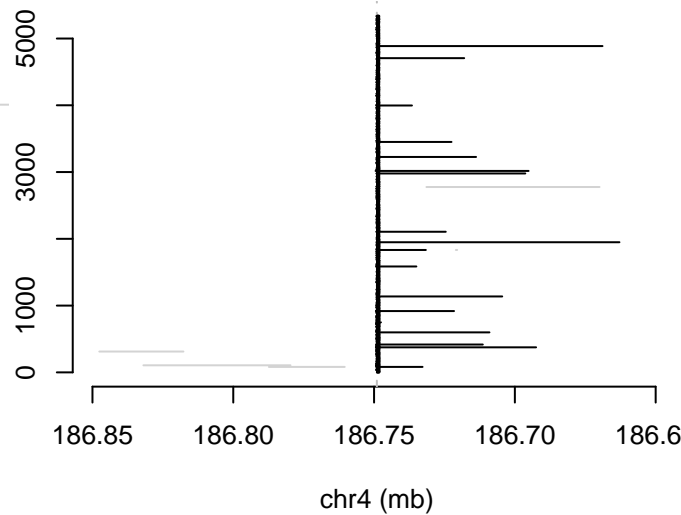

Copy number

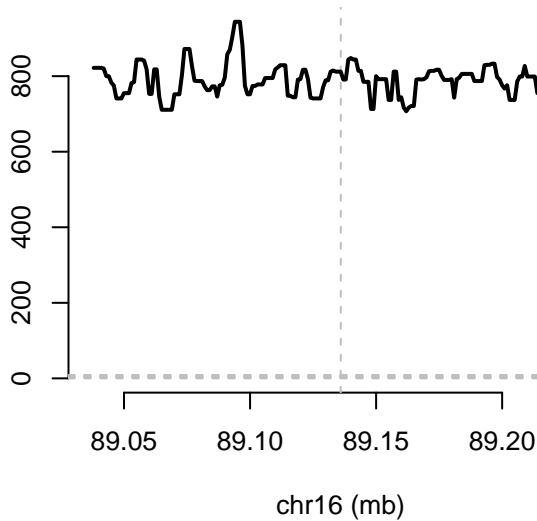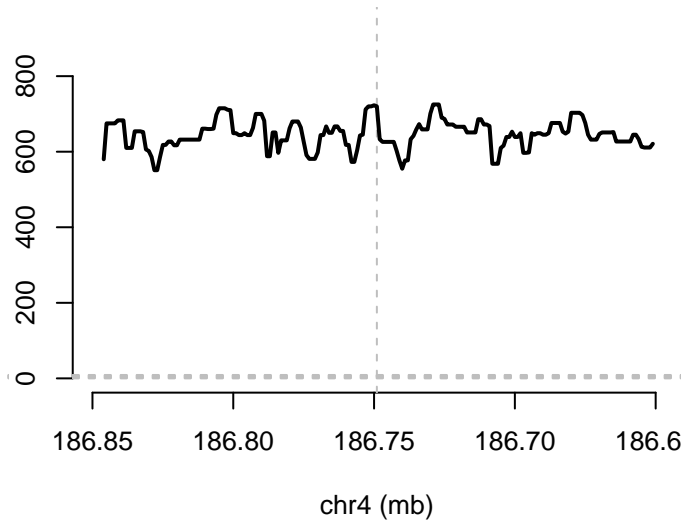

K562 chr4:186,749,008::chr16:89,135,971++

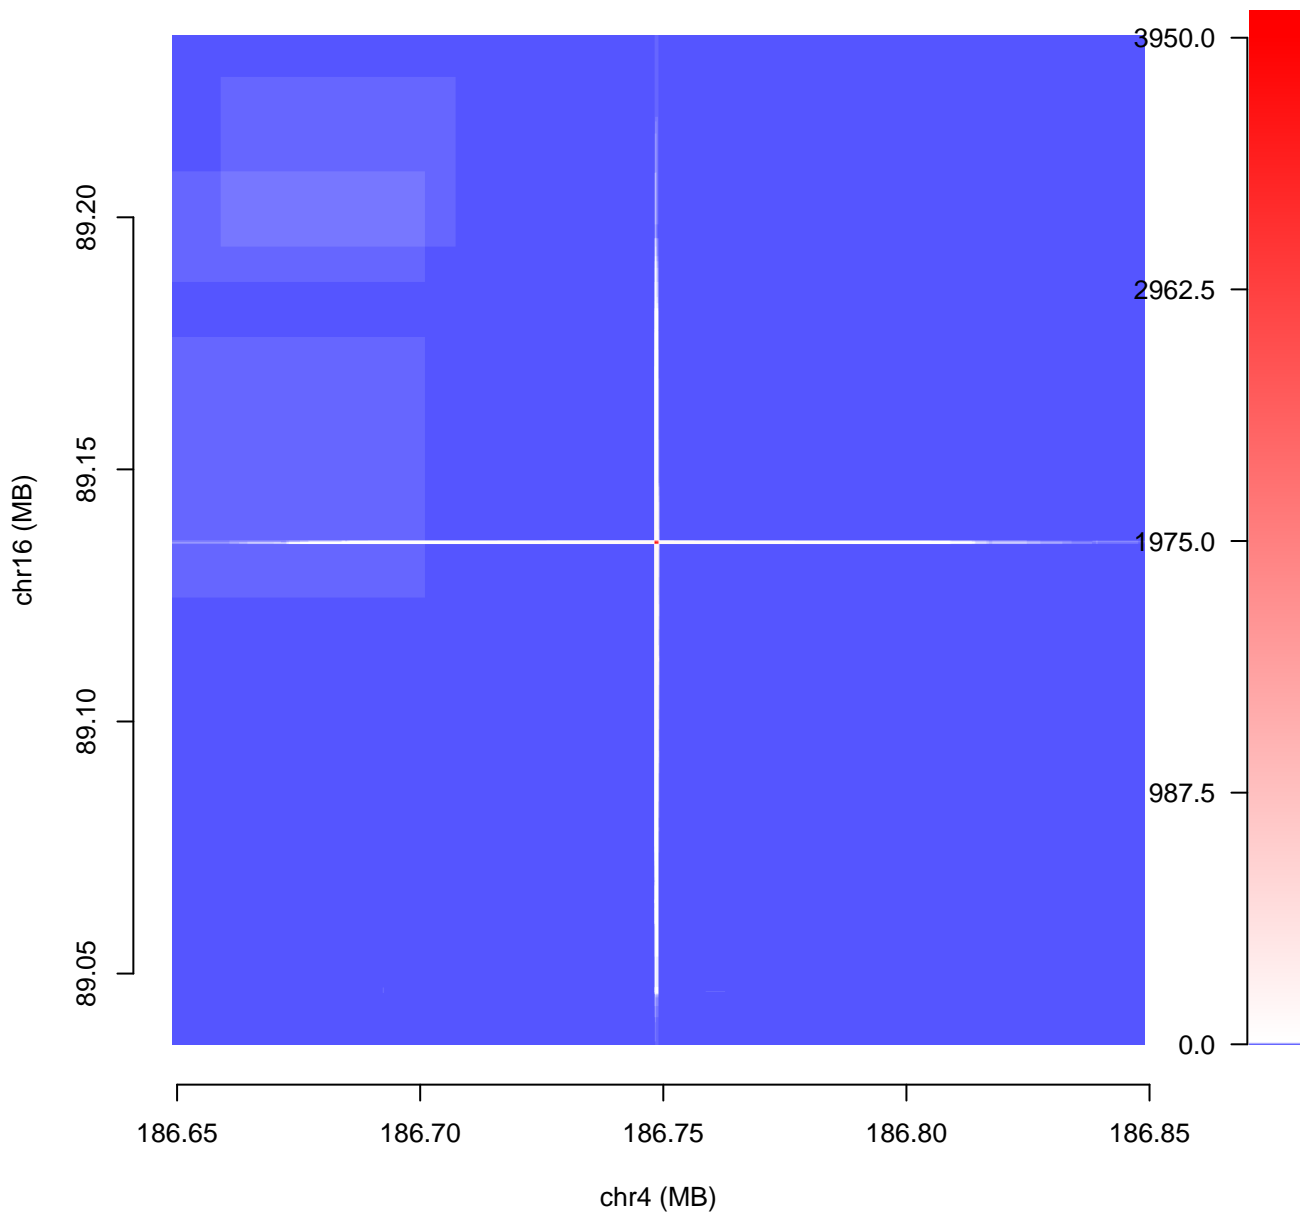

Supplement: Supplemental_Data.zip [file event_208.pdf › event_208.pdf]

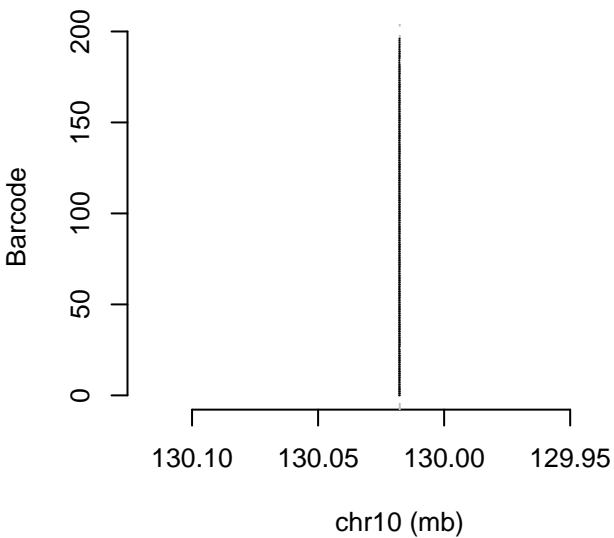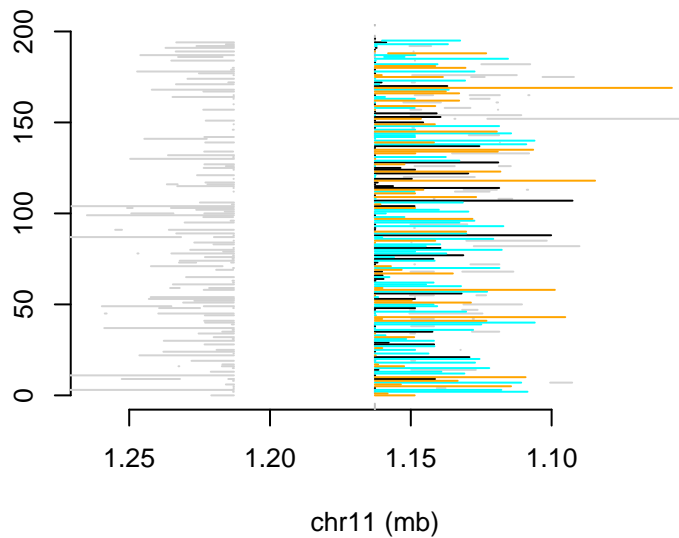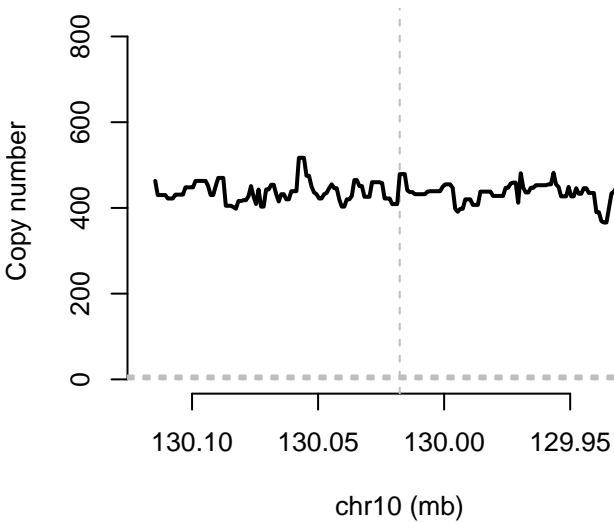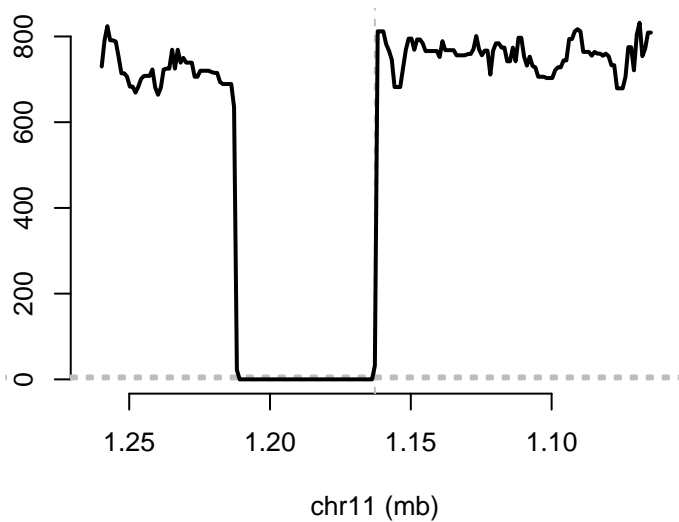

K562 chr10:130,017,612::chr11:1,162,760-+

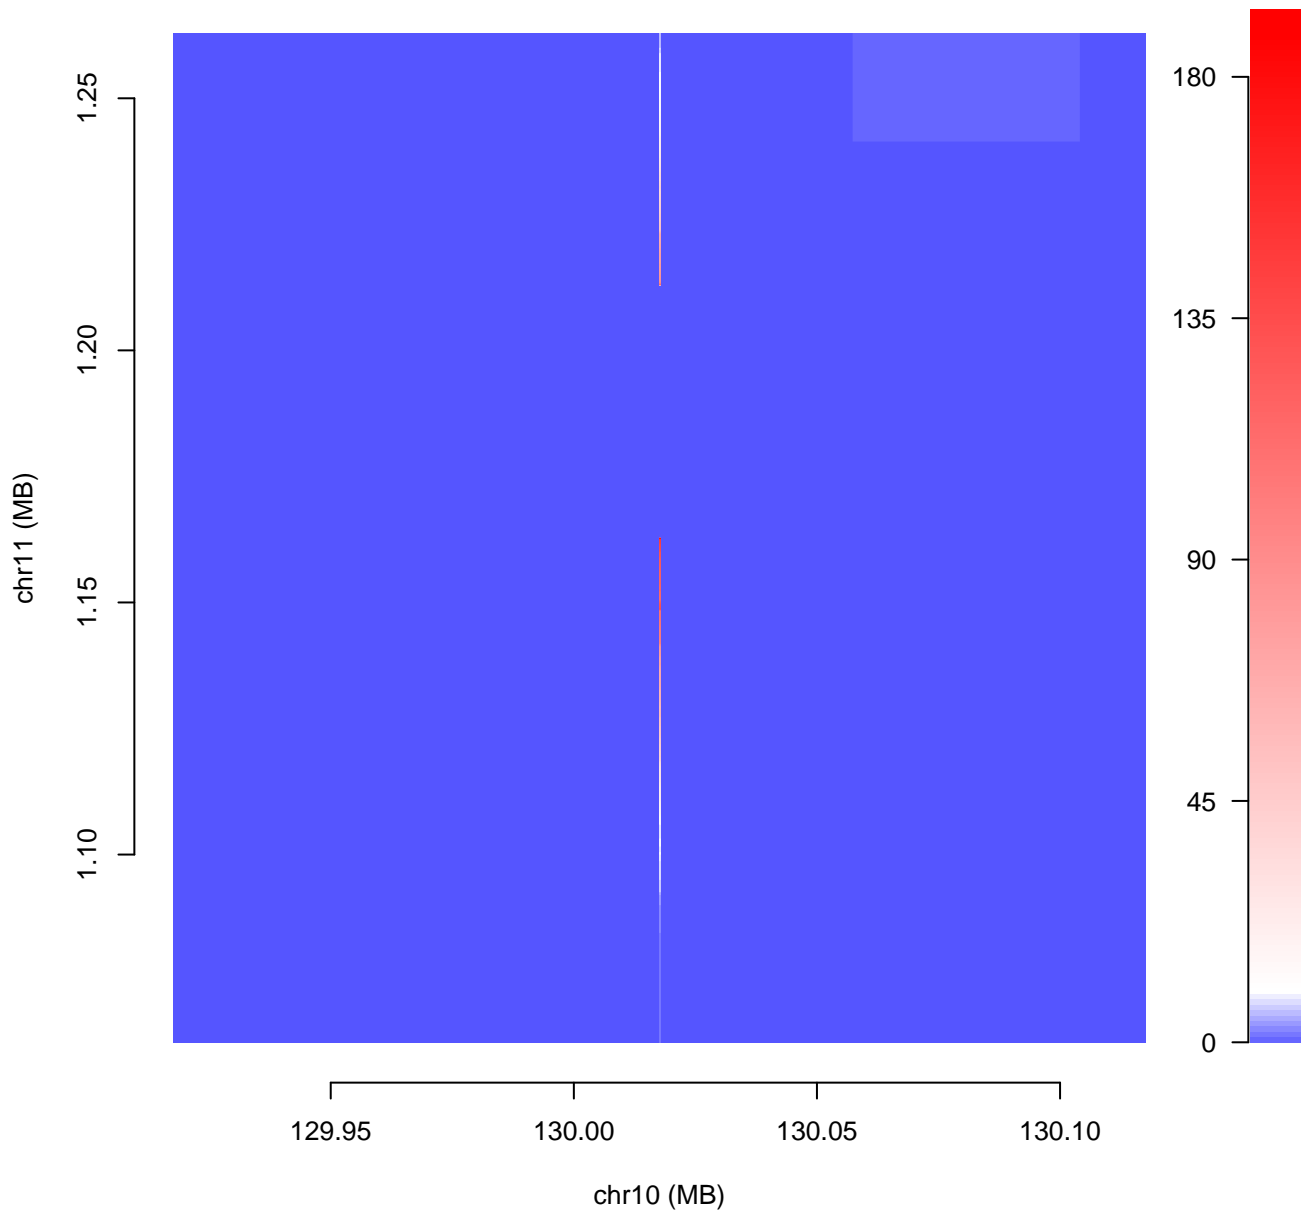

Supplement: Supplemental_Data.zip [file event_209.pdf › event_209.pdf]

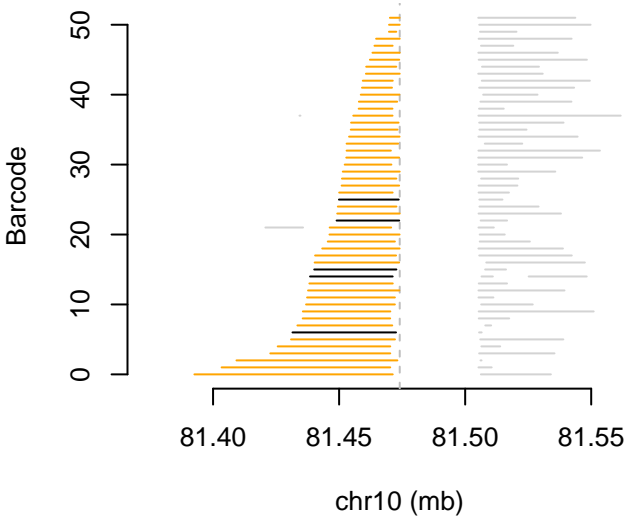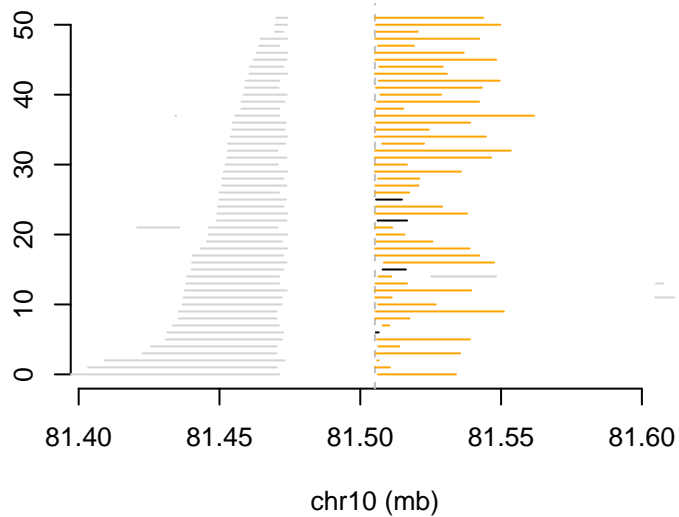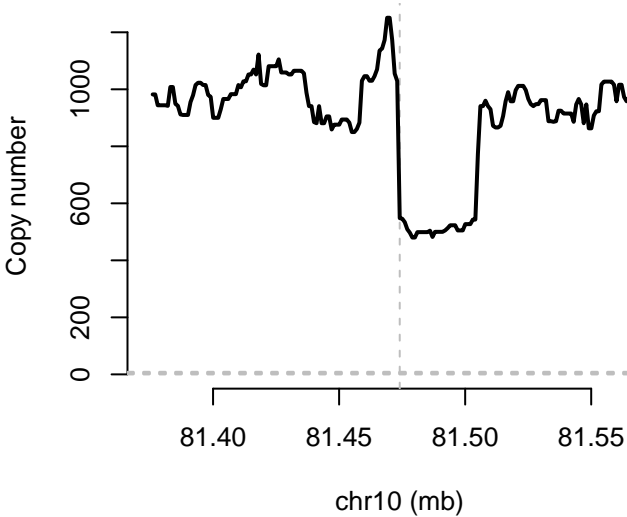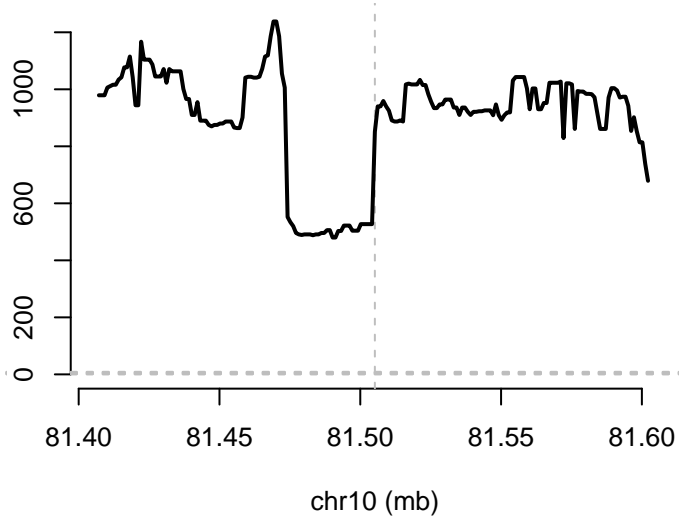

K562 chr10:81,505,182::chr10:81,474,047-+

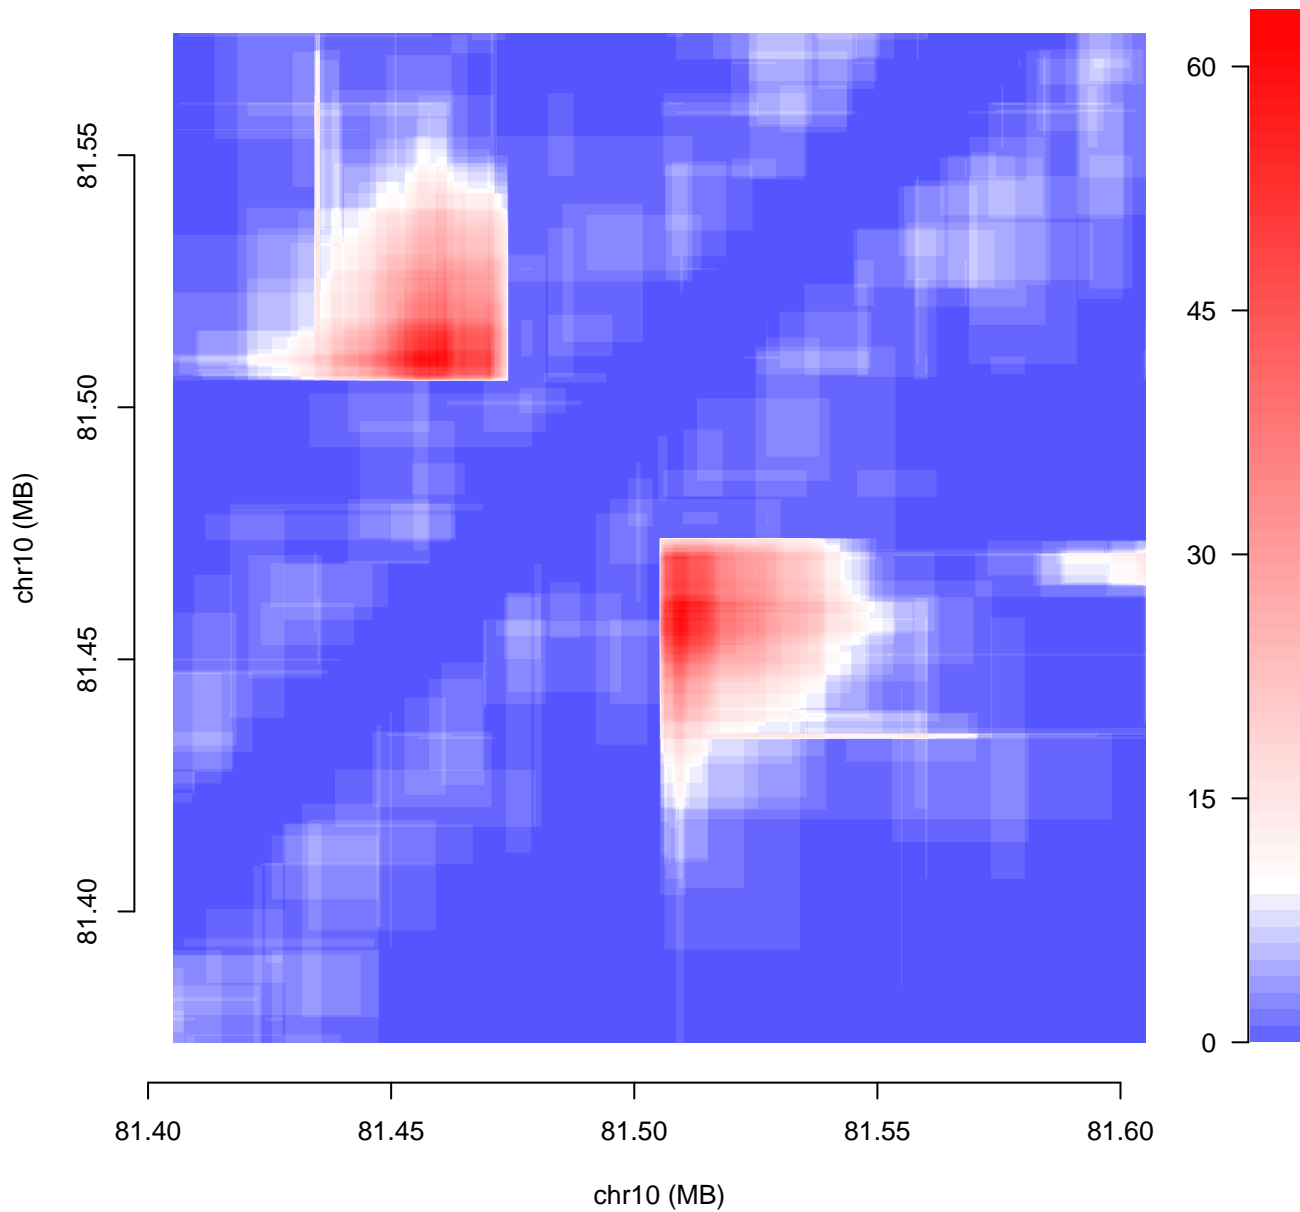

Supplement: Supplemental_Data.zip [file event_21.pdf › event_21.pdf]

Barcode

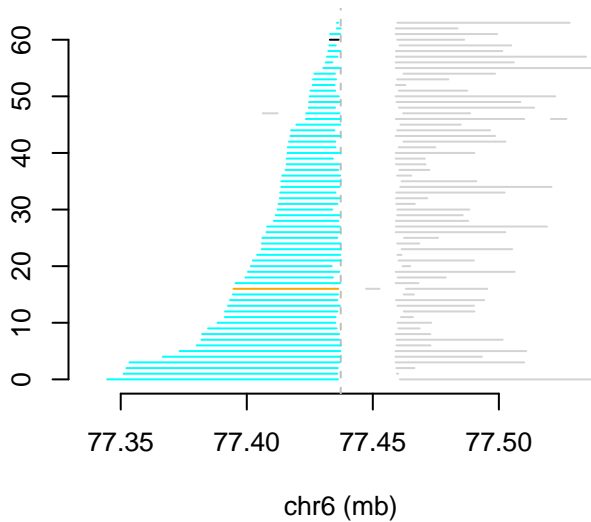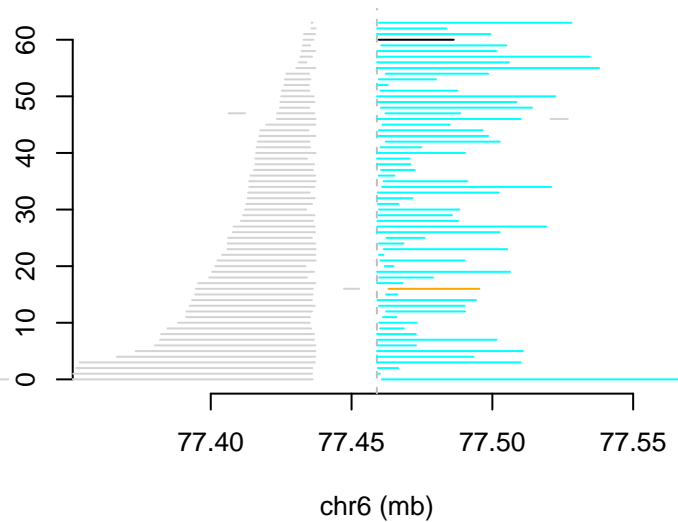

Copy number

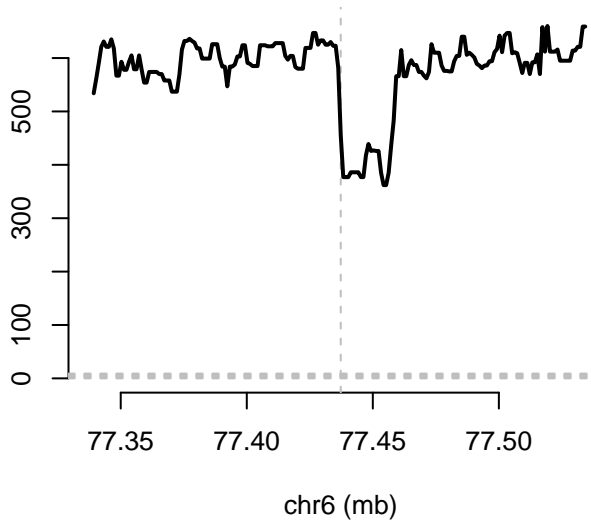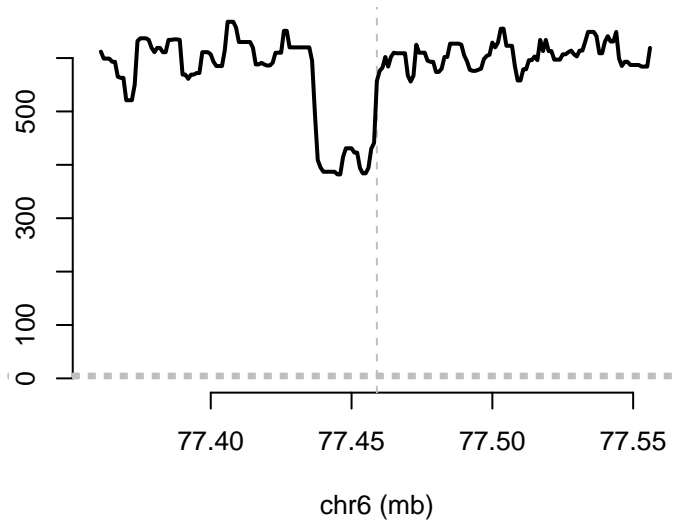

K562 chr6:77,437,276::chr6:77,458,987+-

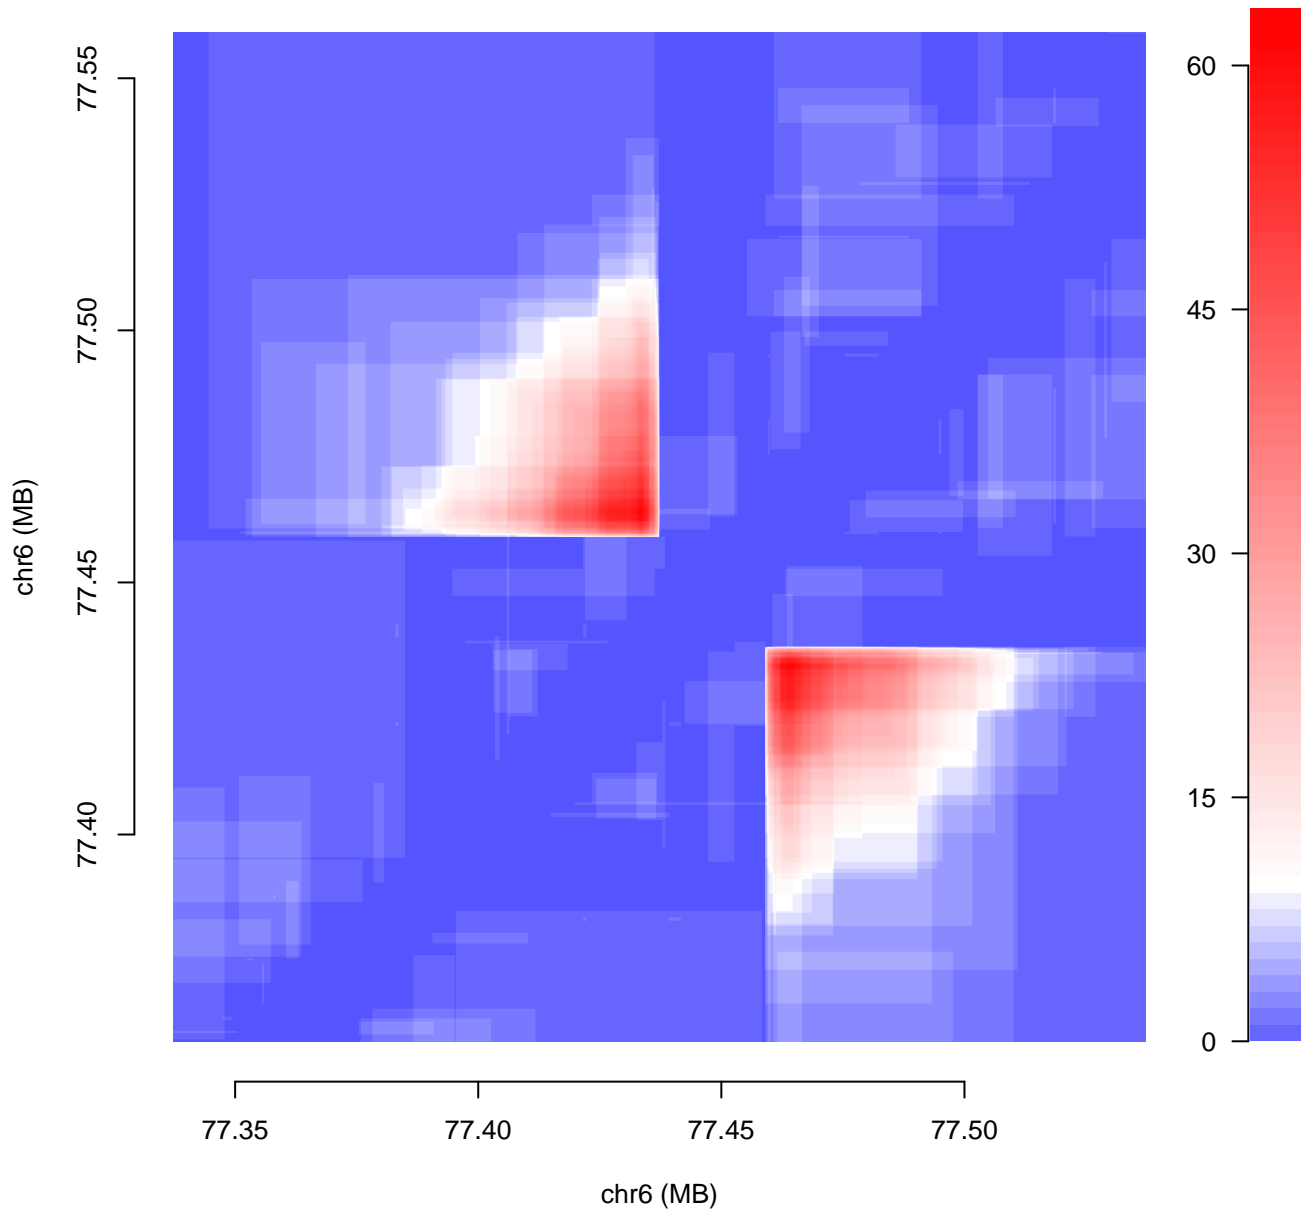

Supplement: Supplemental_Data.zip [file event_210.pdf › event_210.pdf]

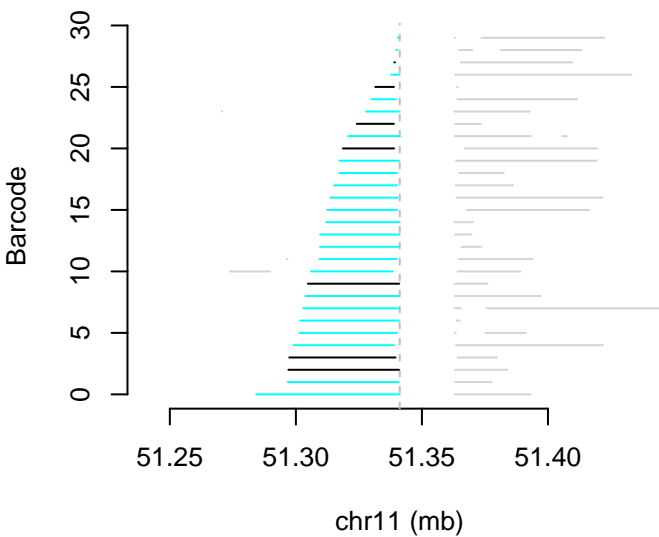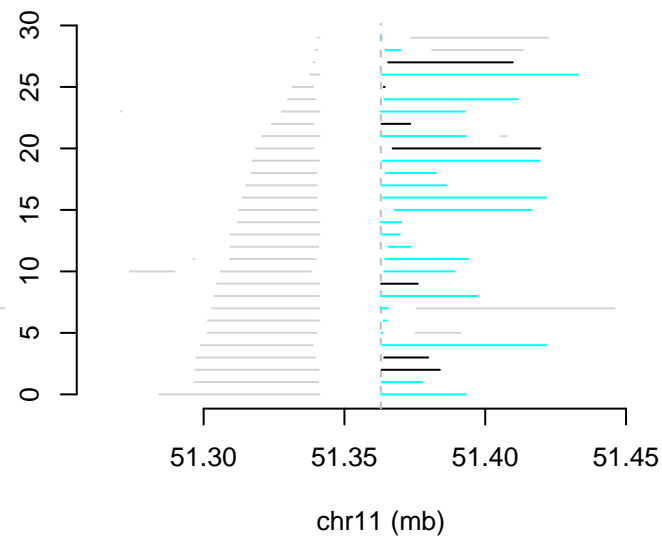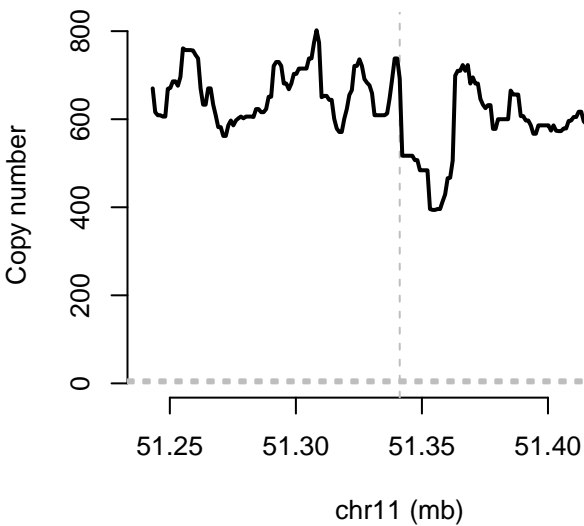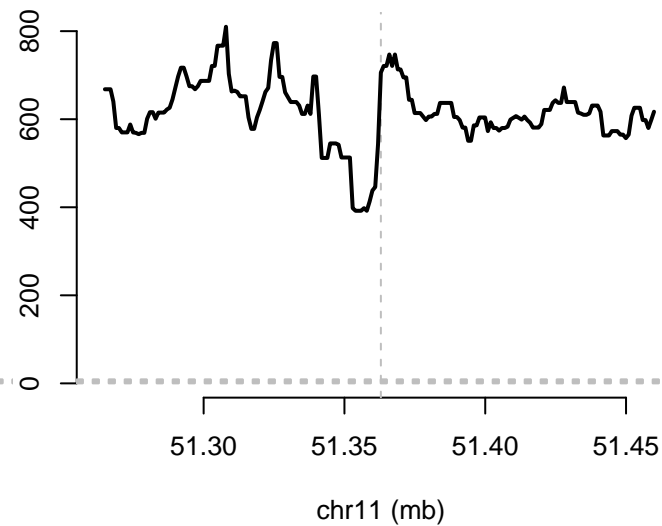

K562 chr11:51,362,937::chr11:51,341,200-+

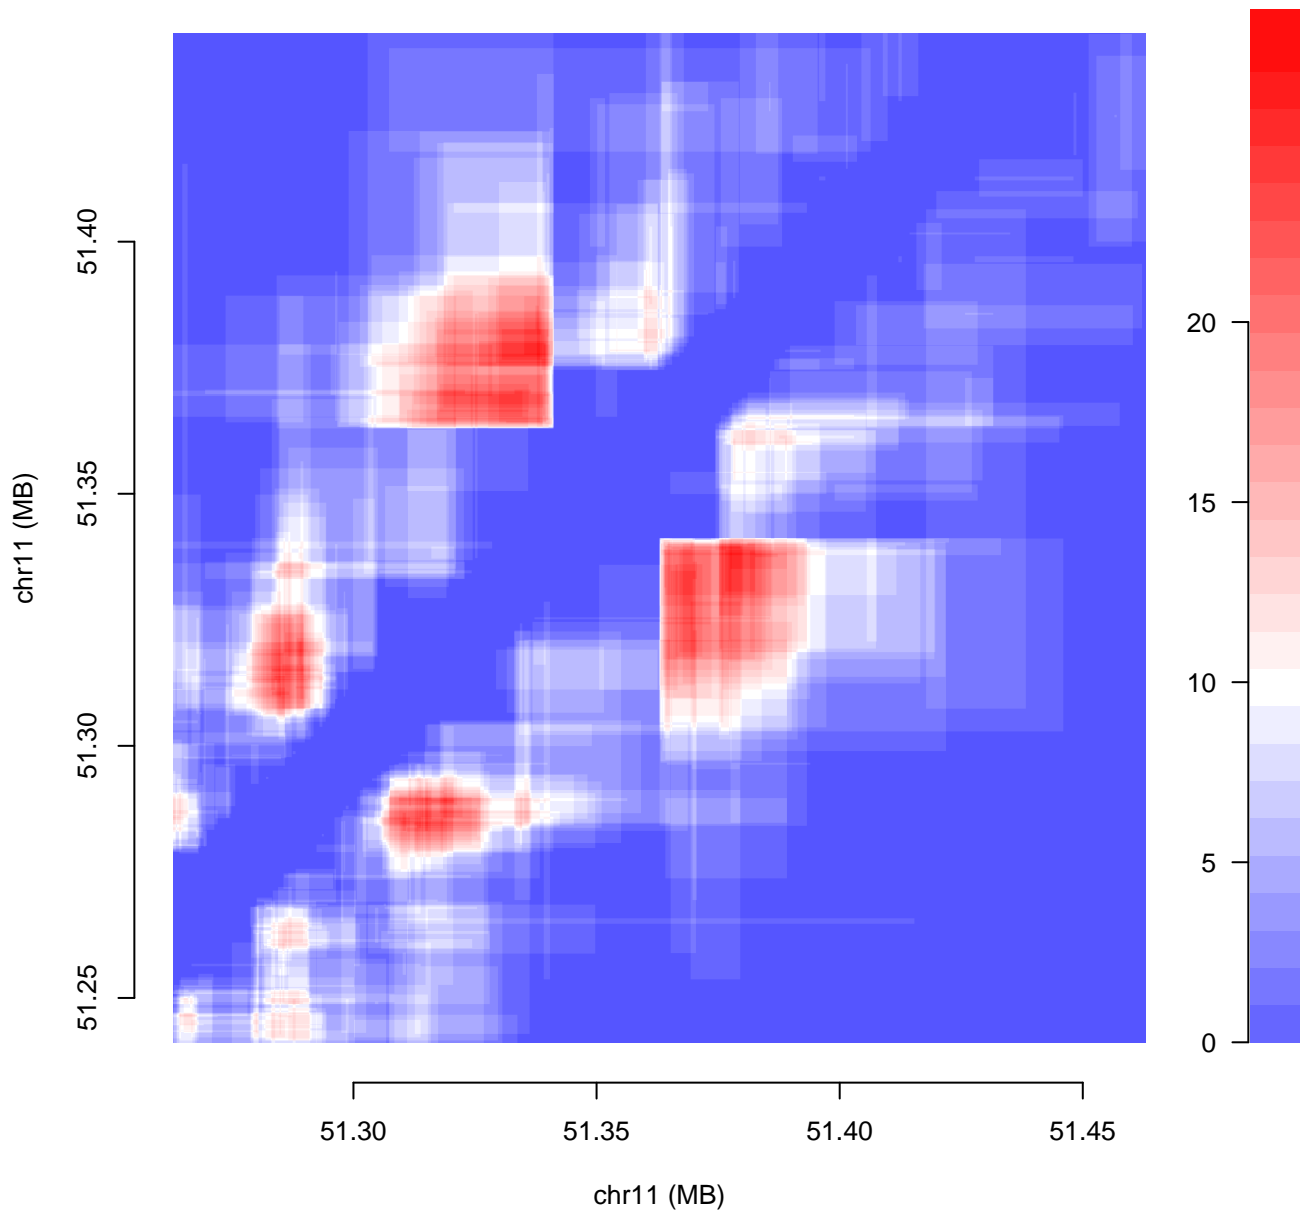

Supplement: Supplemental_Data.zip [file event_211.pdf › event_211.pdf]

Barcode

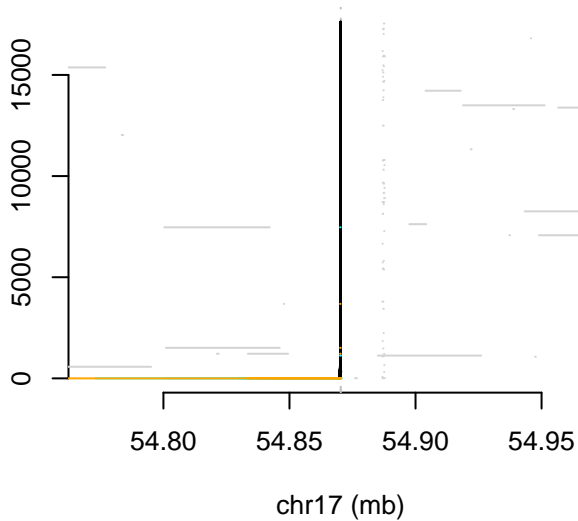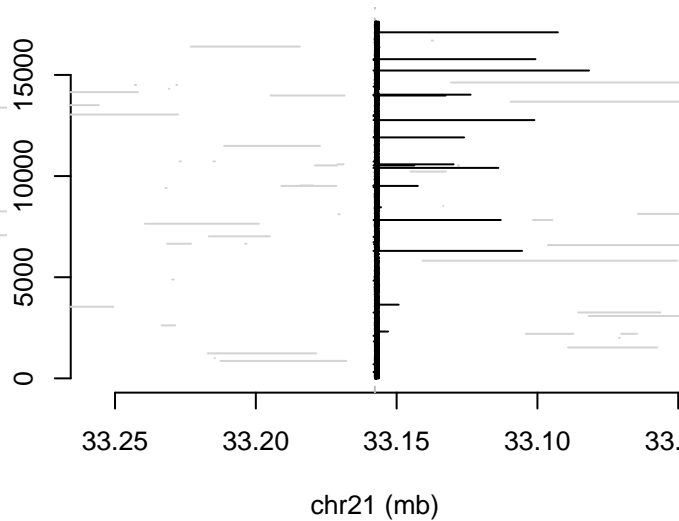

Copy number

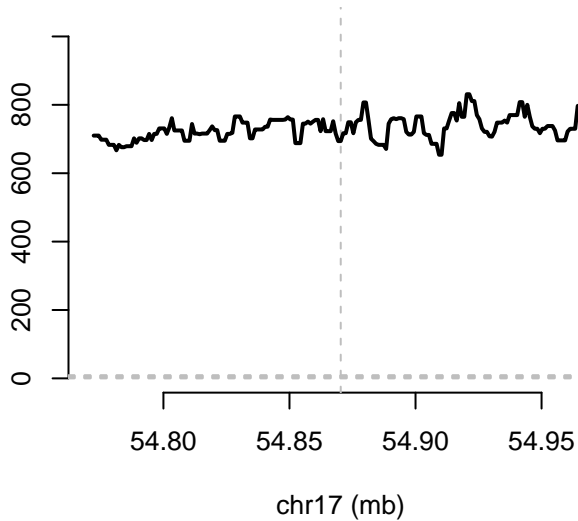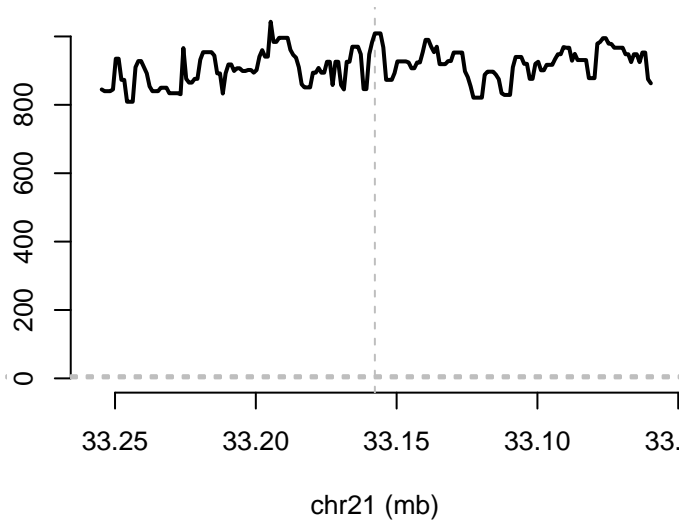

K562 chr21:33,157,729::chr17:54,870,335++

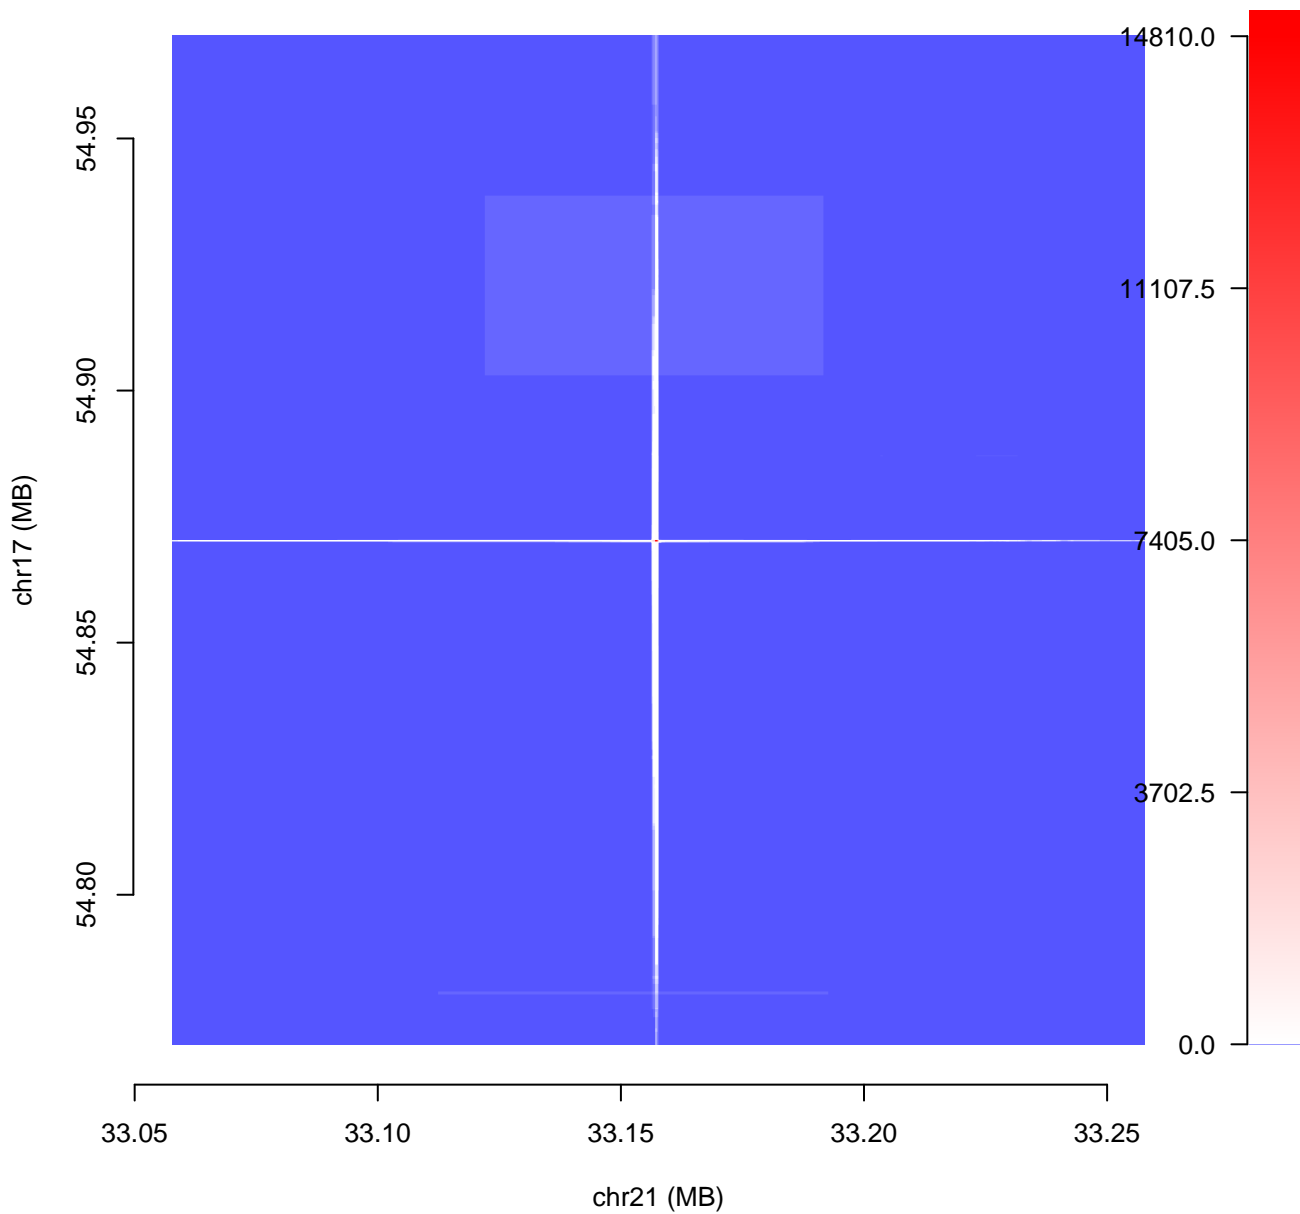

Supplement: Supplemental_Data.zip [file event_212.pdf › event_212.pdf]

Barcode

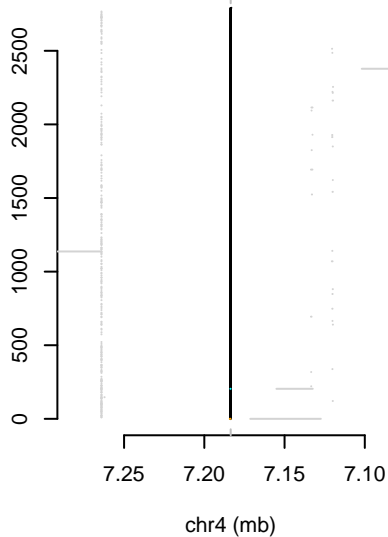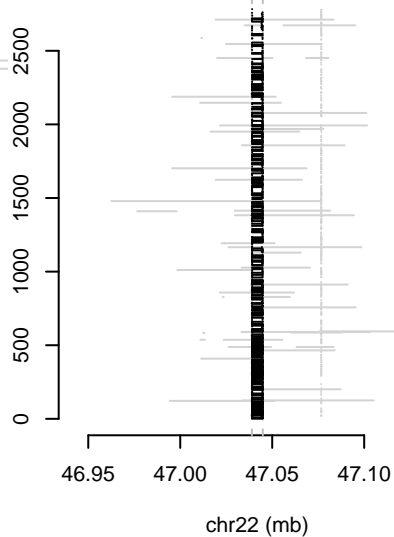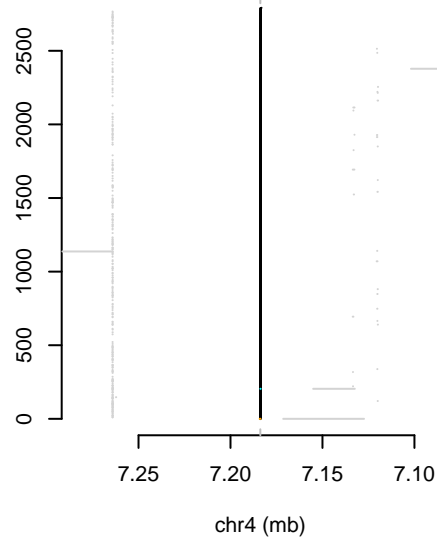

Copy number

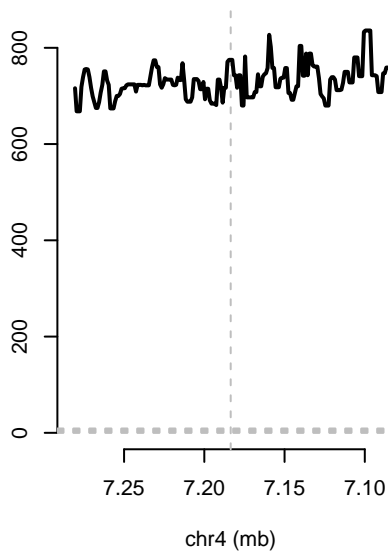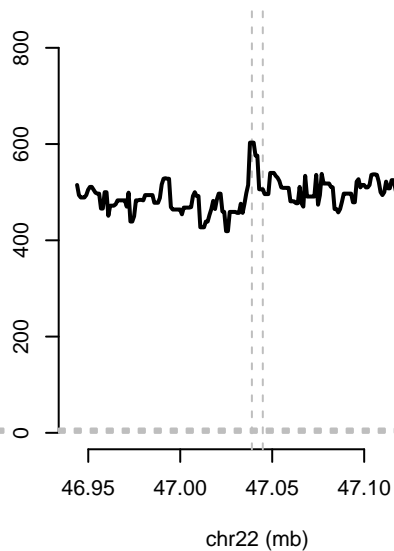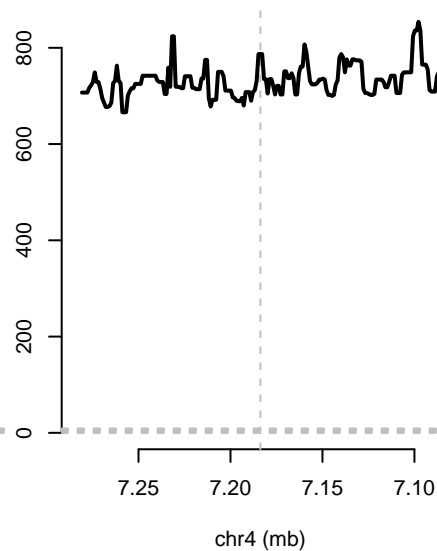

K562 chr4:7,183,565::chr22:47,038,951--

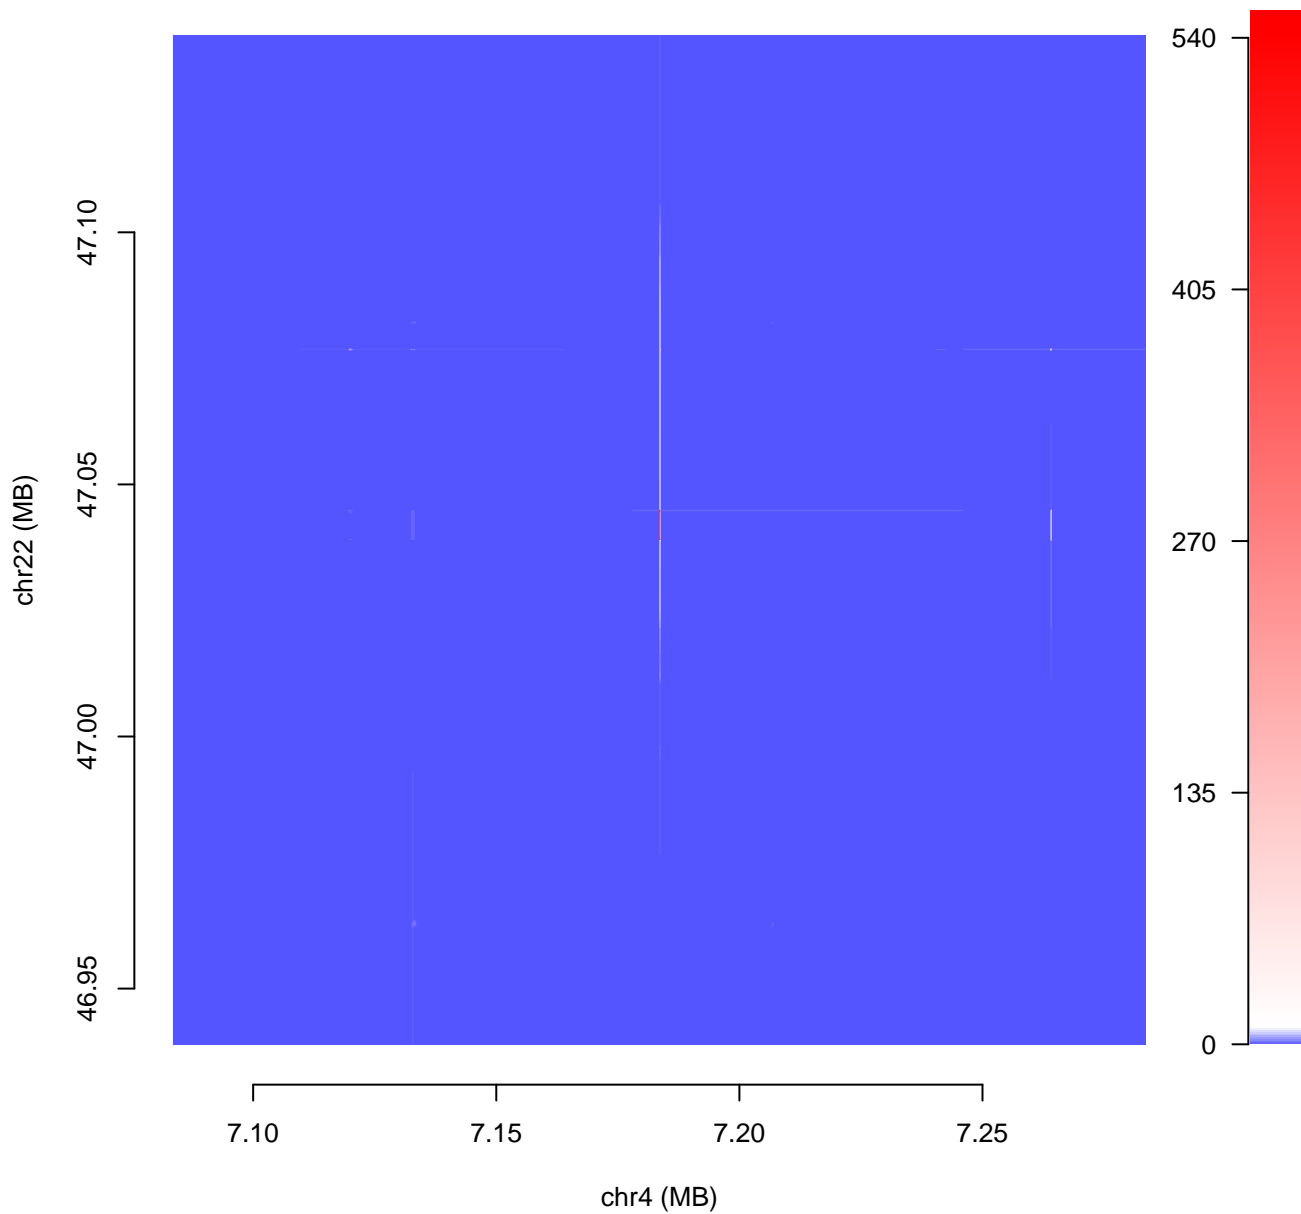

K562 chr22:47,038,951::chr22:47,044,891-+

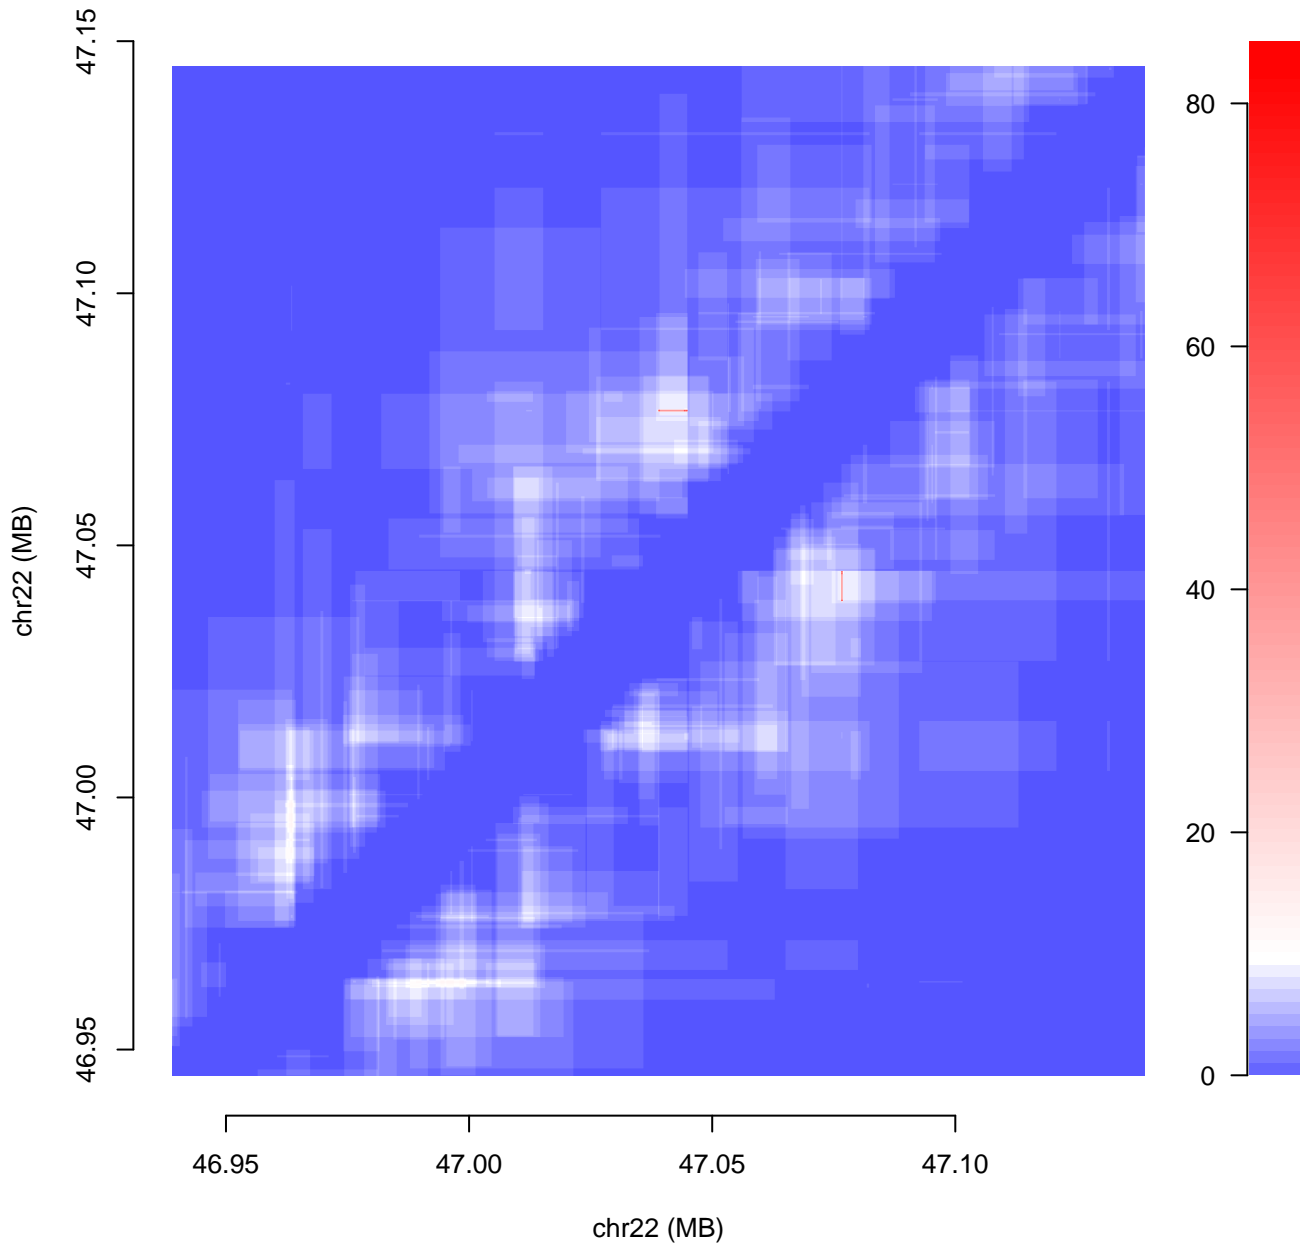

K562 chr22:47,044,891::chr4:7,183,771++

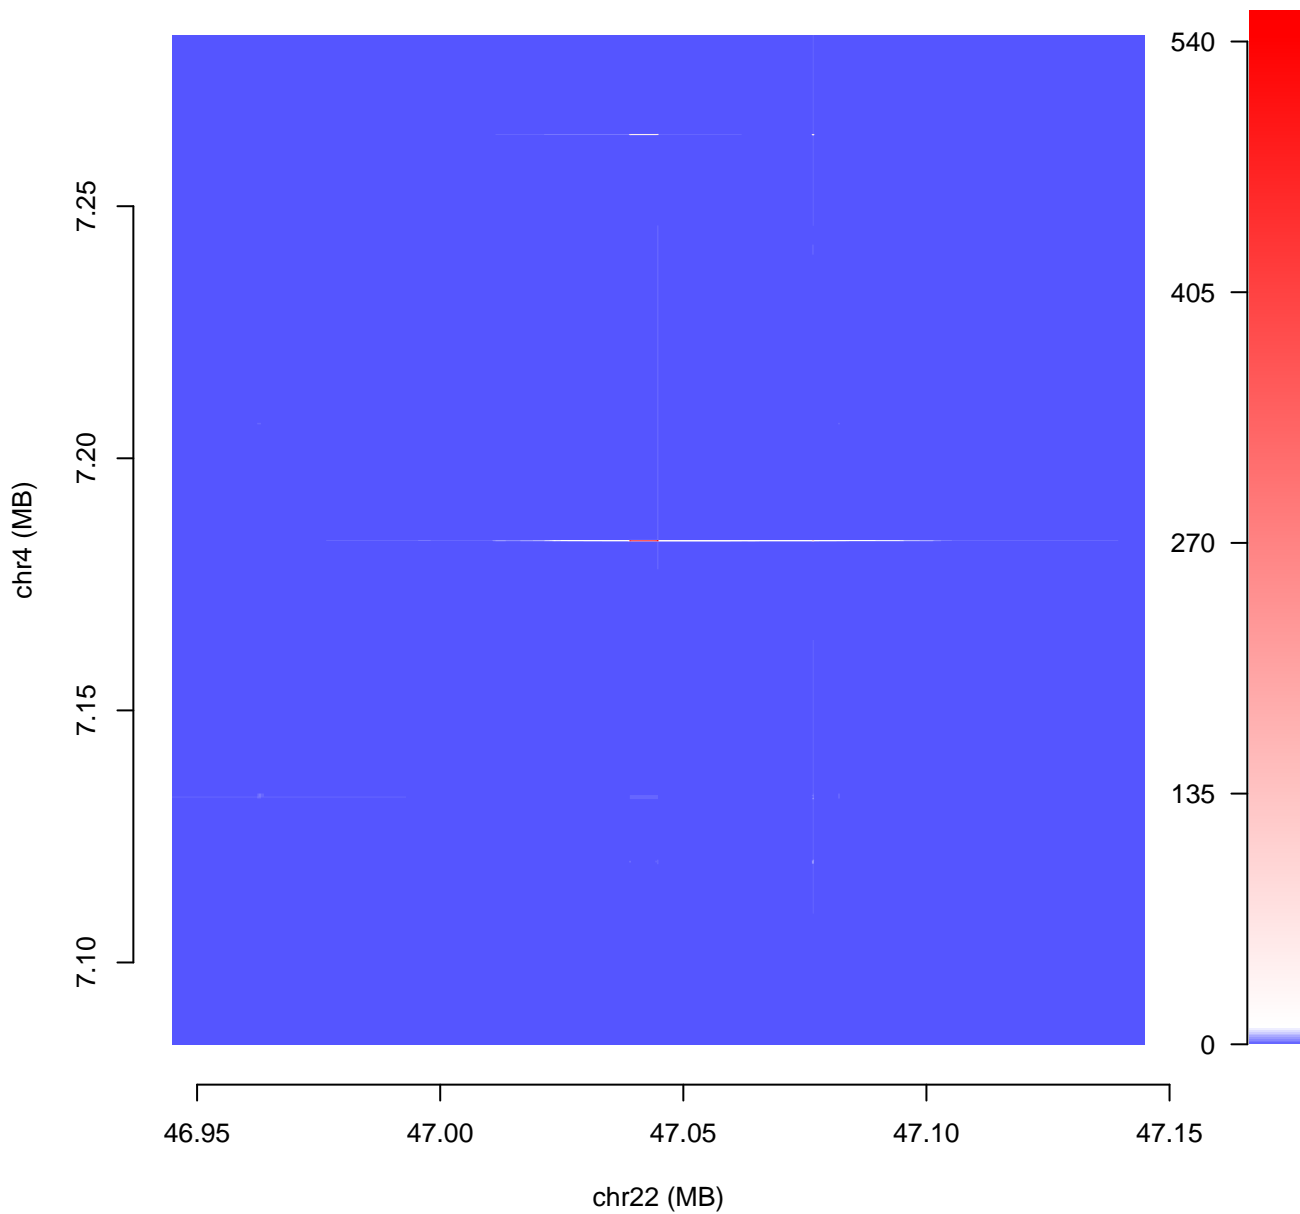

Supplement: Supplemental_Data.zip [file event_213.pdf › event_213.pdf]

Barcode

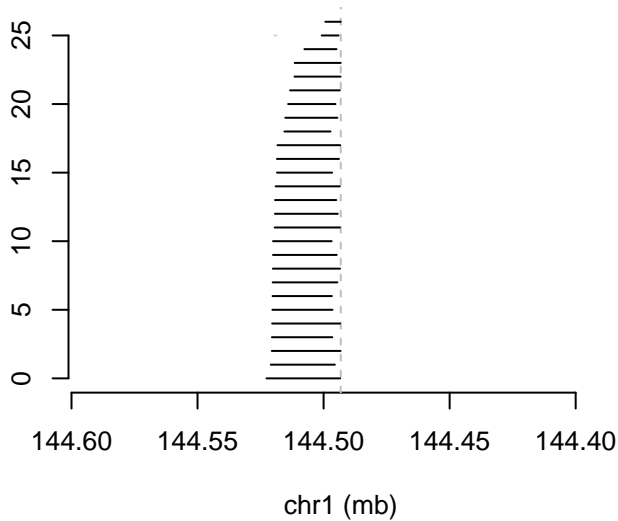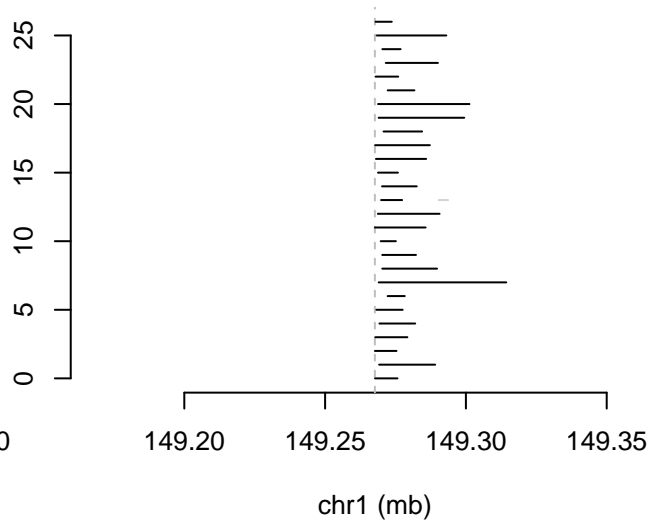

Copy number

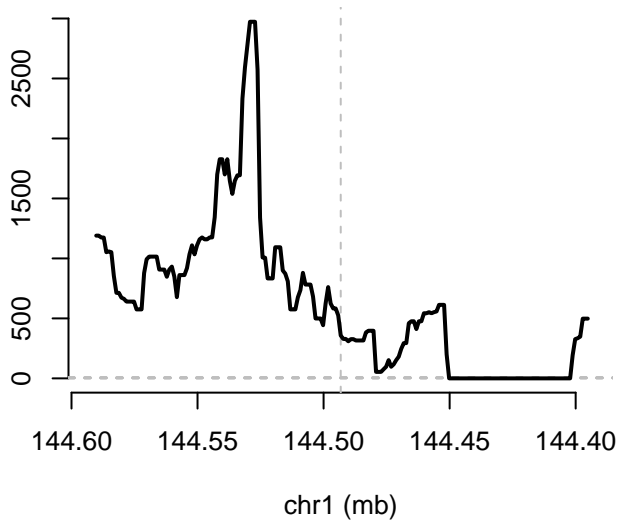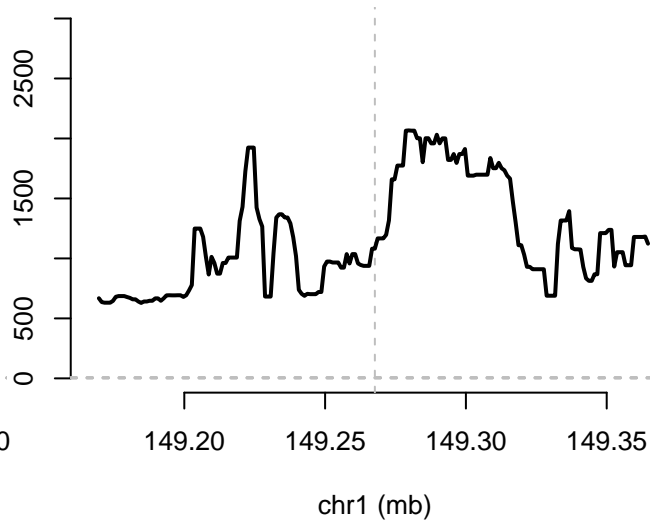

K562 chr1:149,267,669::chr1:144,493,193--

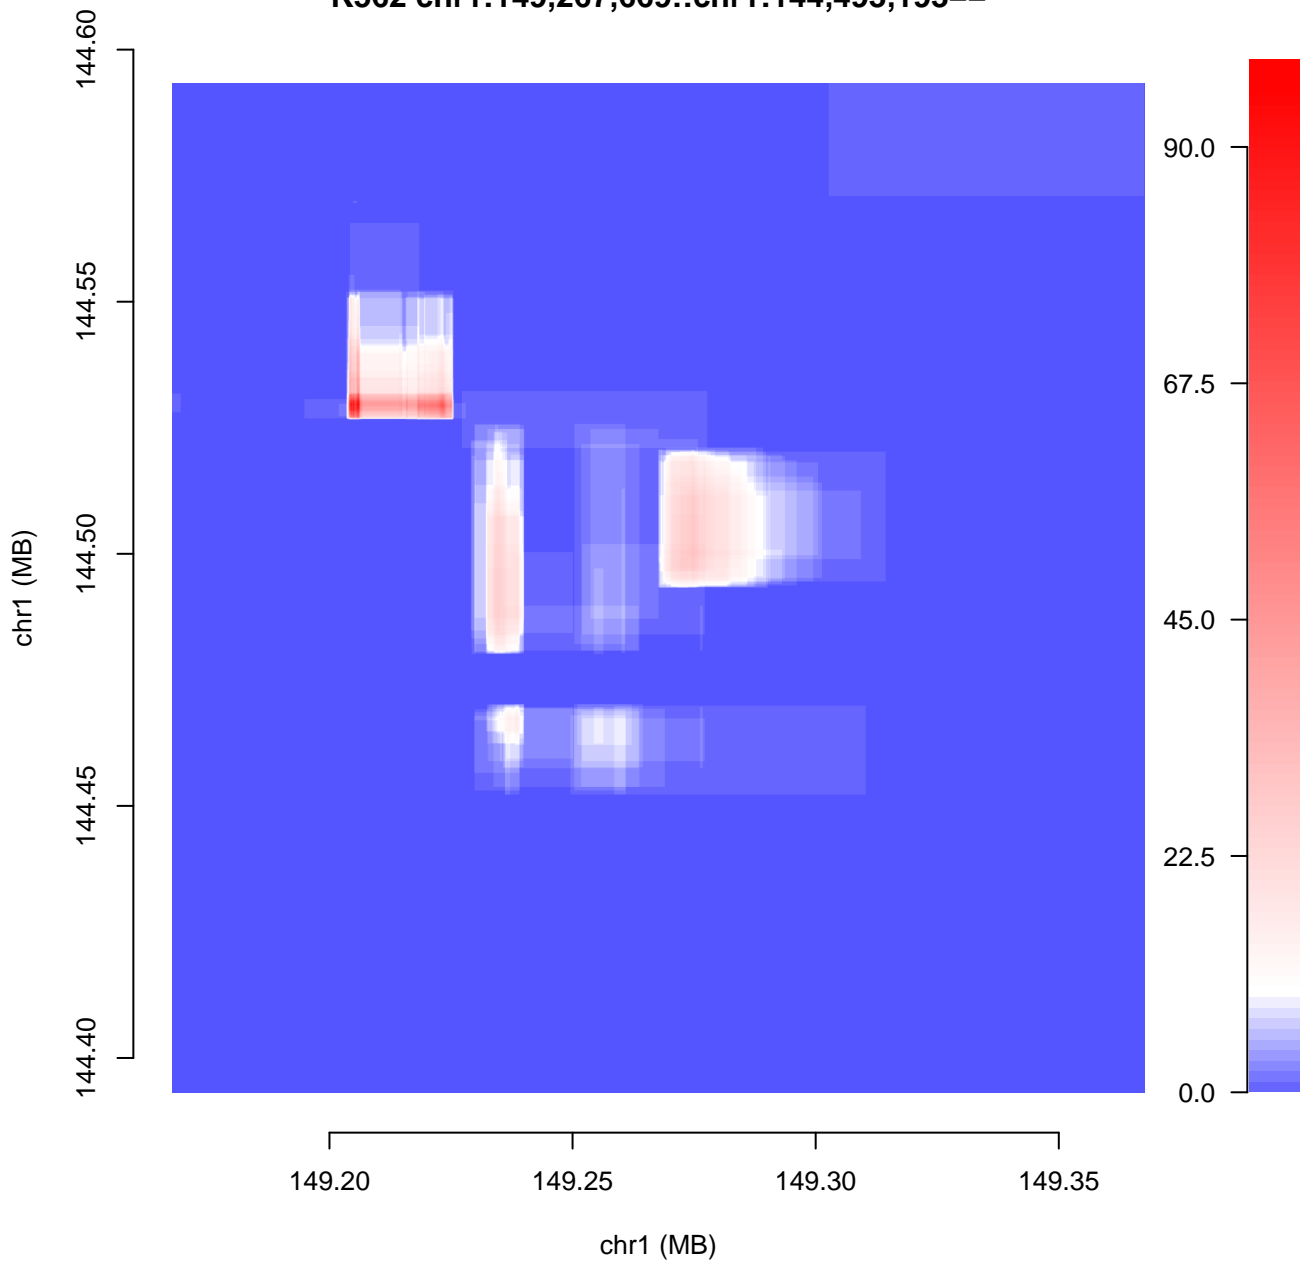

Supplement: Supplemental_Data.zip [file event_214.pdf › event_214.pdf]

Barcode

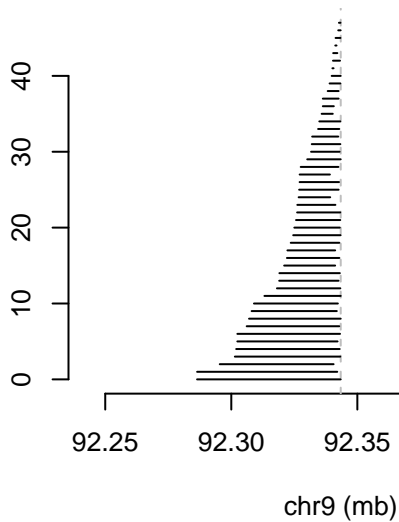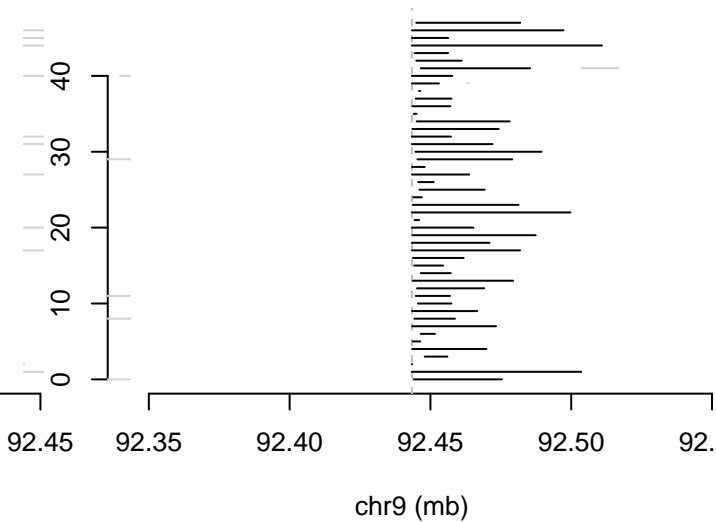

Copy number

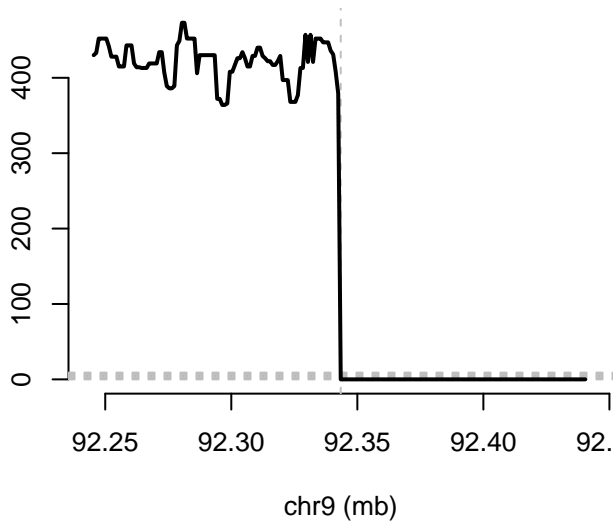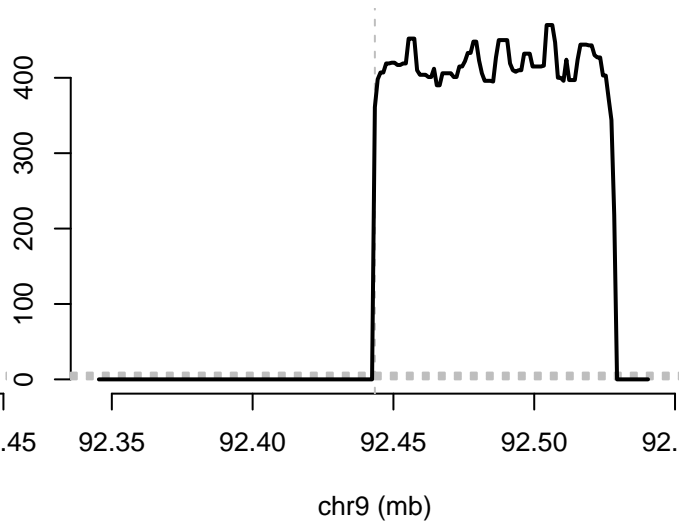

K562 chr9:92,443,413::chr9:92,343,417-+

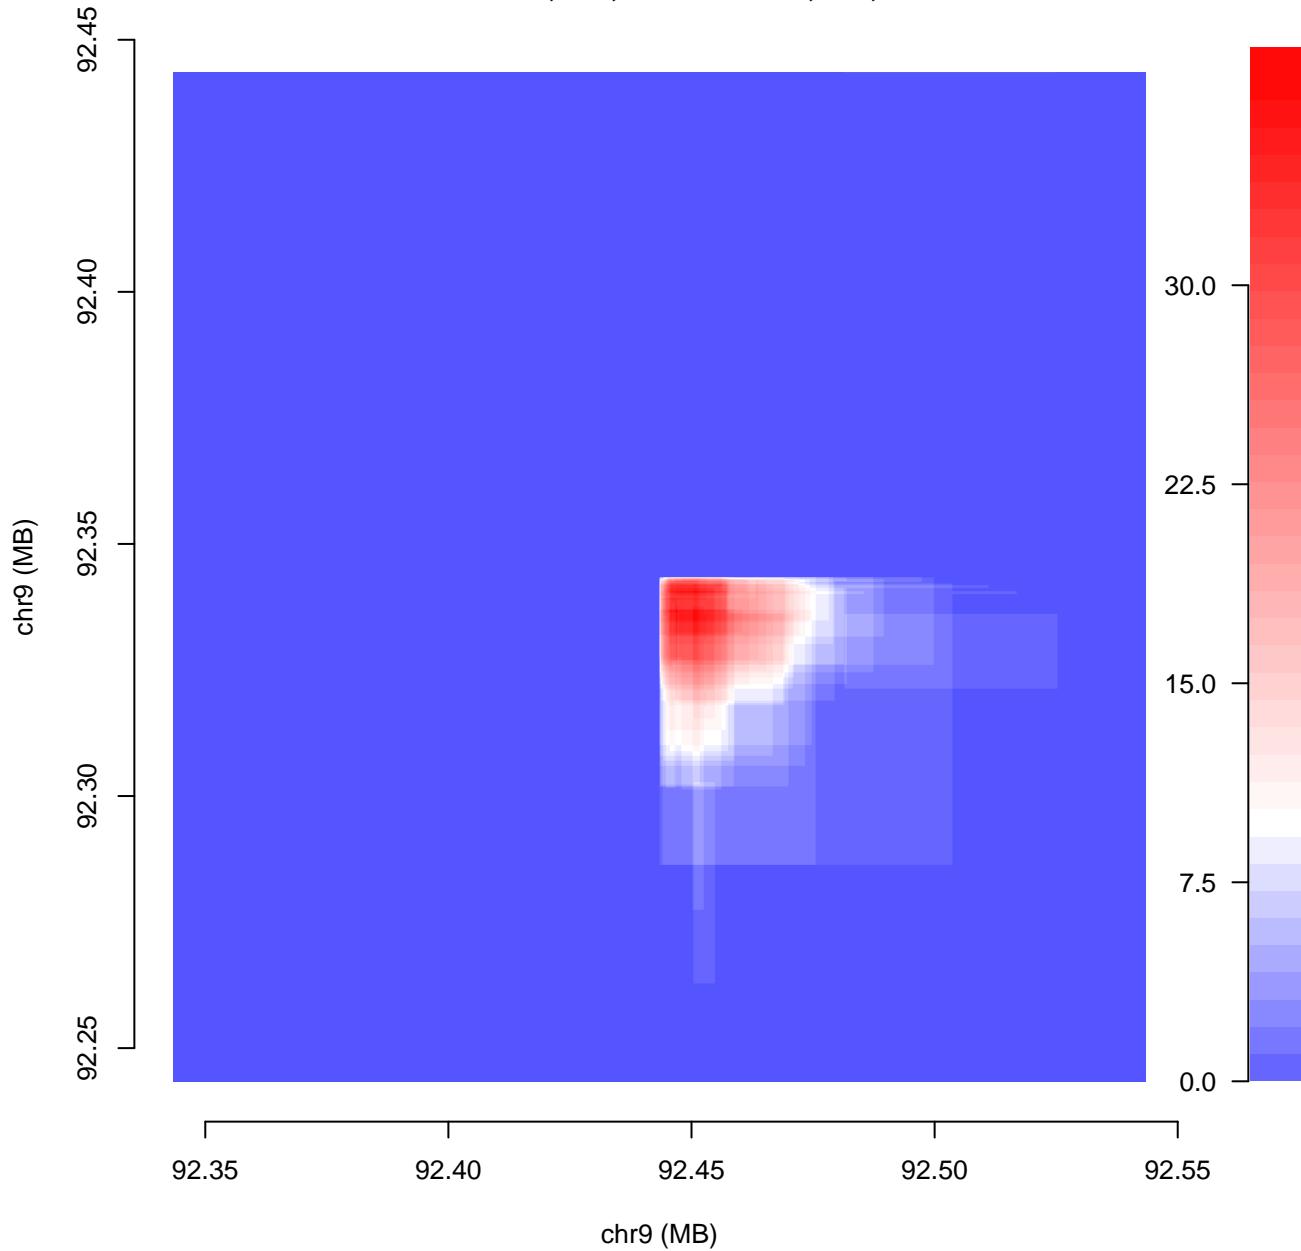

Supplement: Supplemental_Data.zip [file event_215.pdf › event_215.pdf]

Barcode

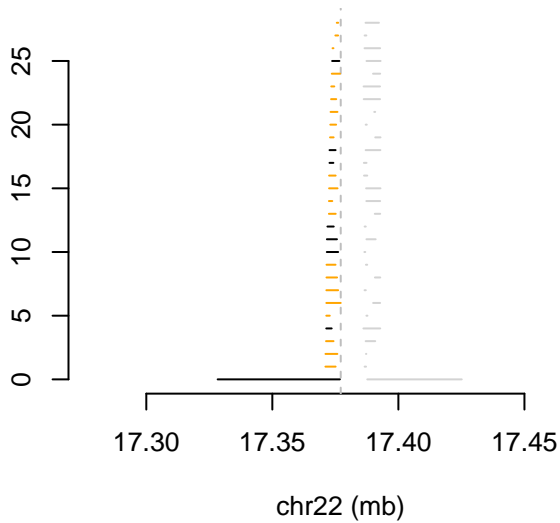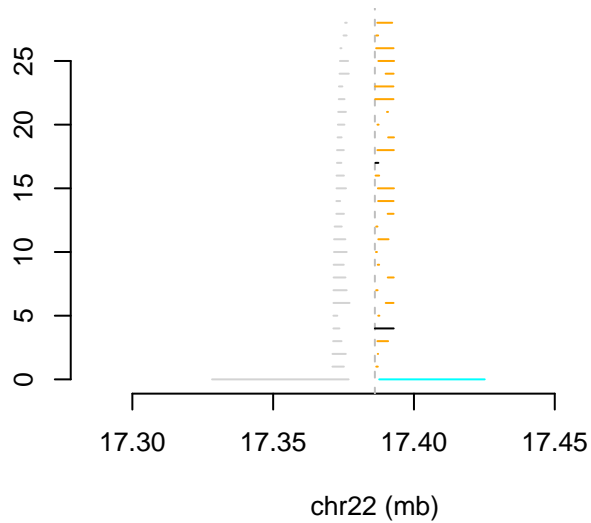

Copy number

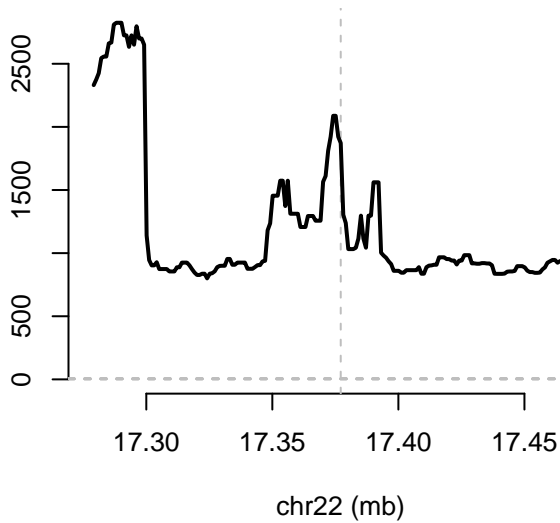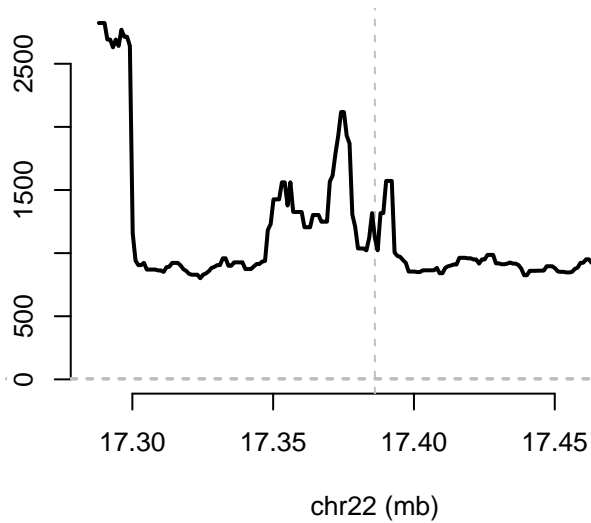

K562 chr22:17,377,135::chr22:17,386,120+-

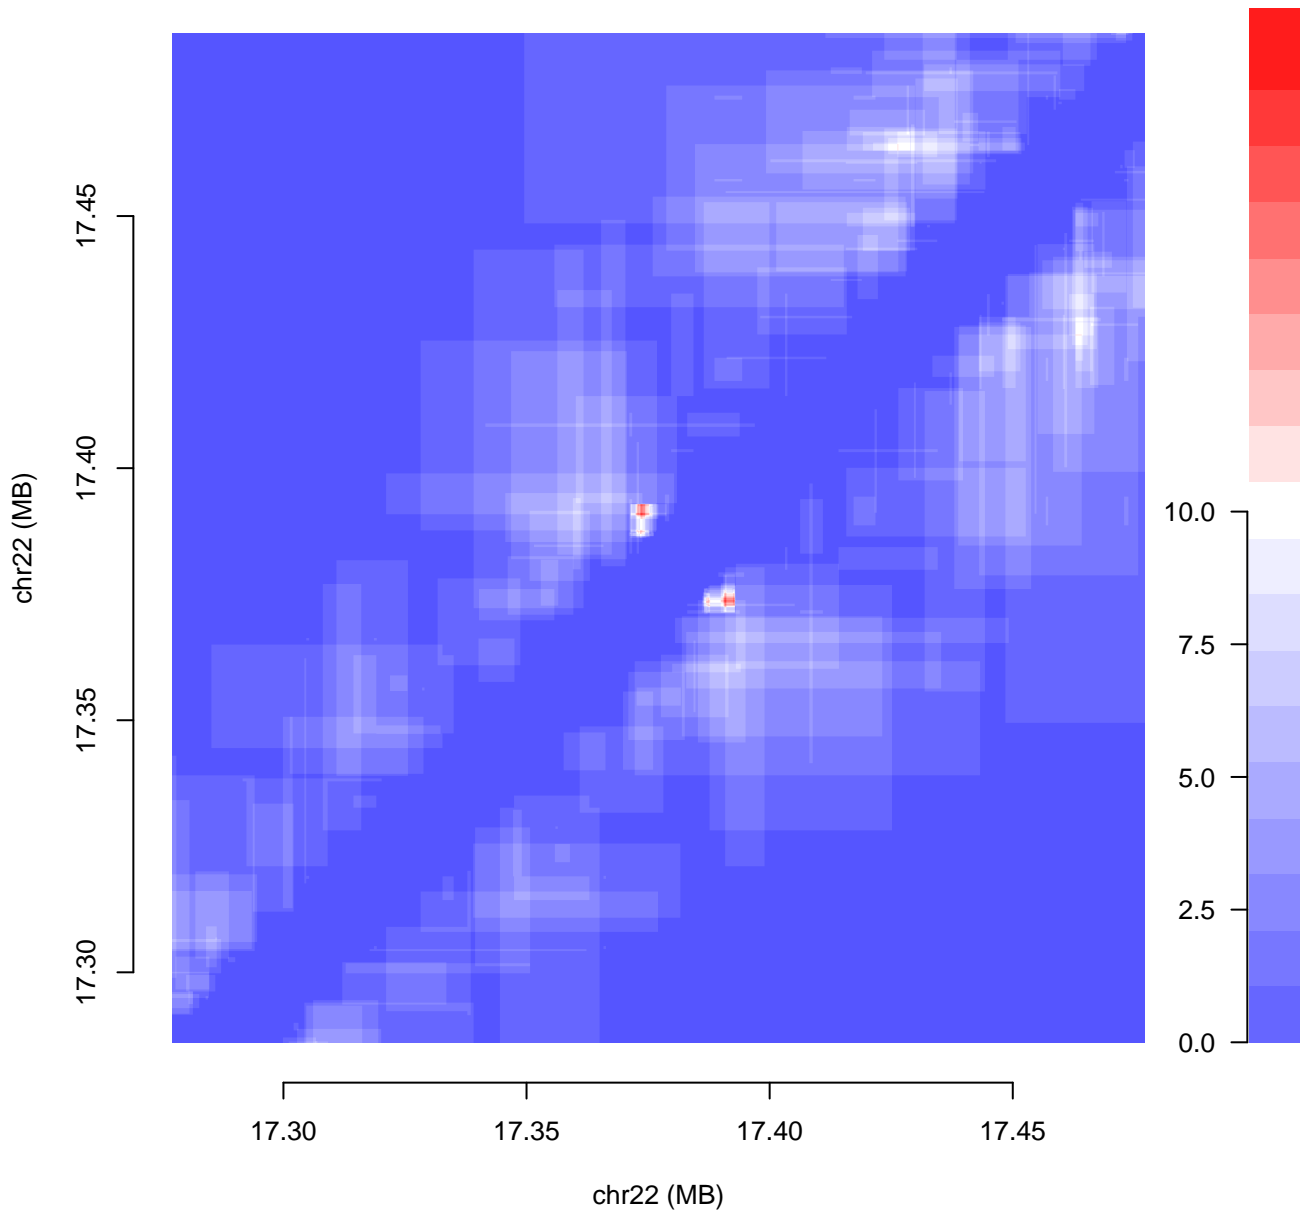

Supplement: Supplemental_Data.zip [file event_216.pdf › event_216.pdf]

Barcode

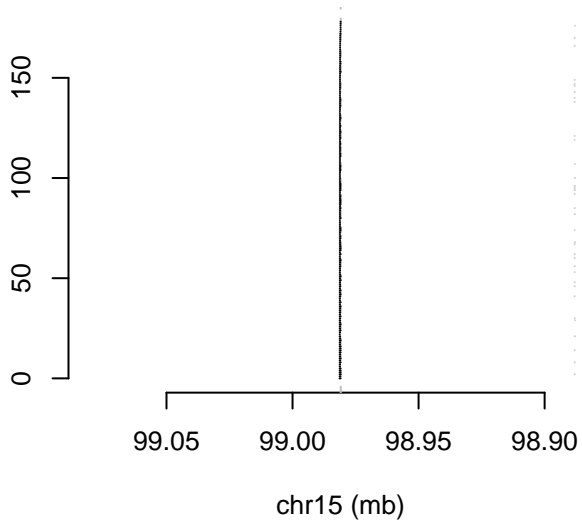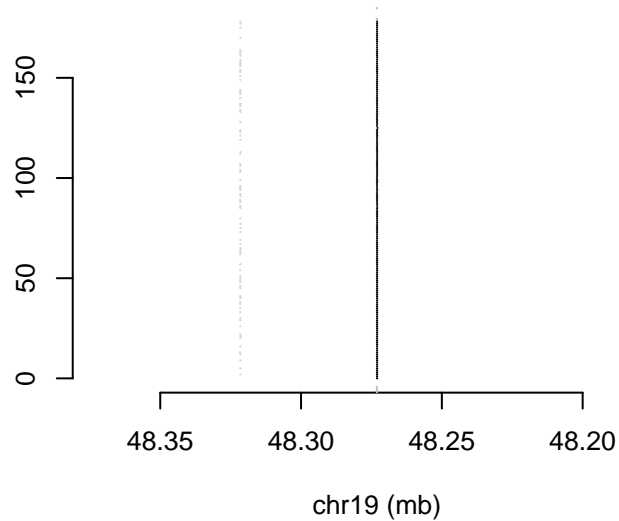

Copy number

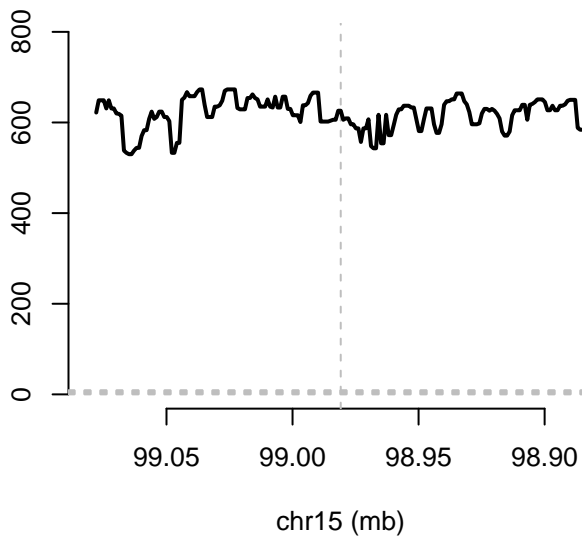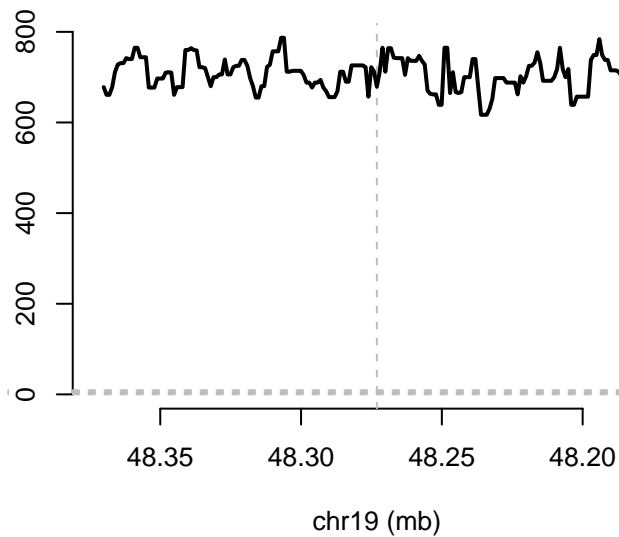

K562 chr15:98,980,878::chr19:48,273,075-+

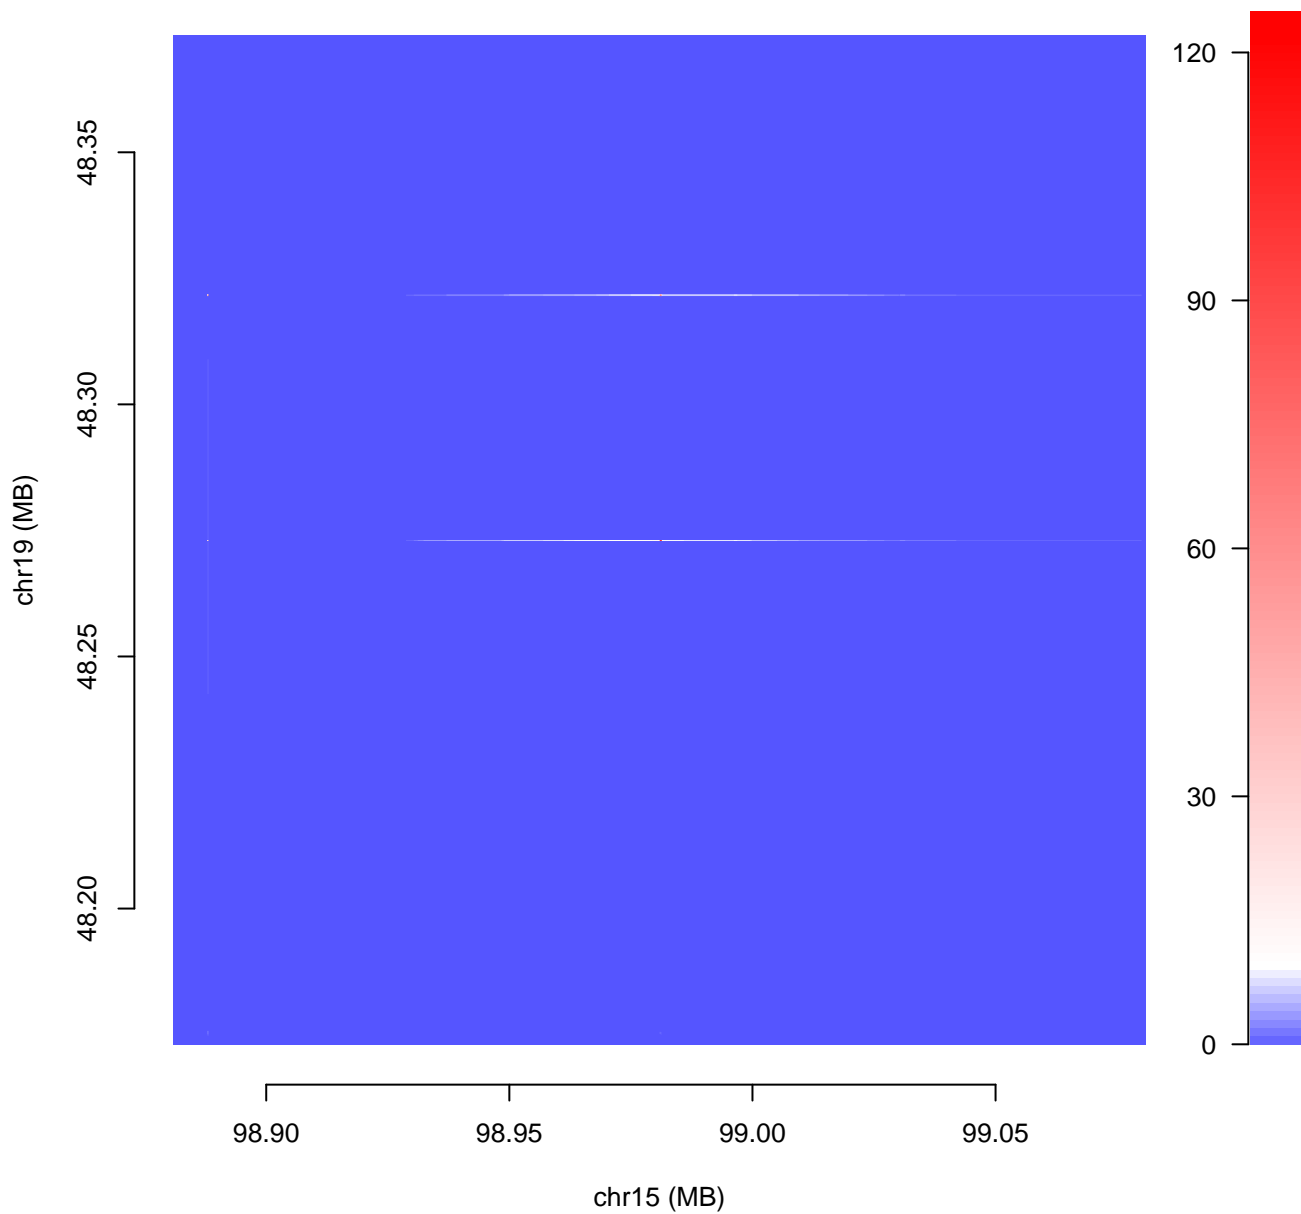

Supplement: Supplemental_Data.zip [file event_217.pdf › event_217.pdf]

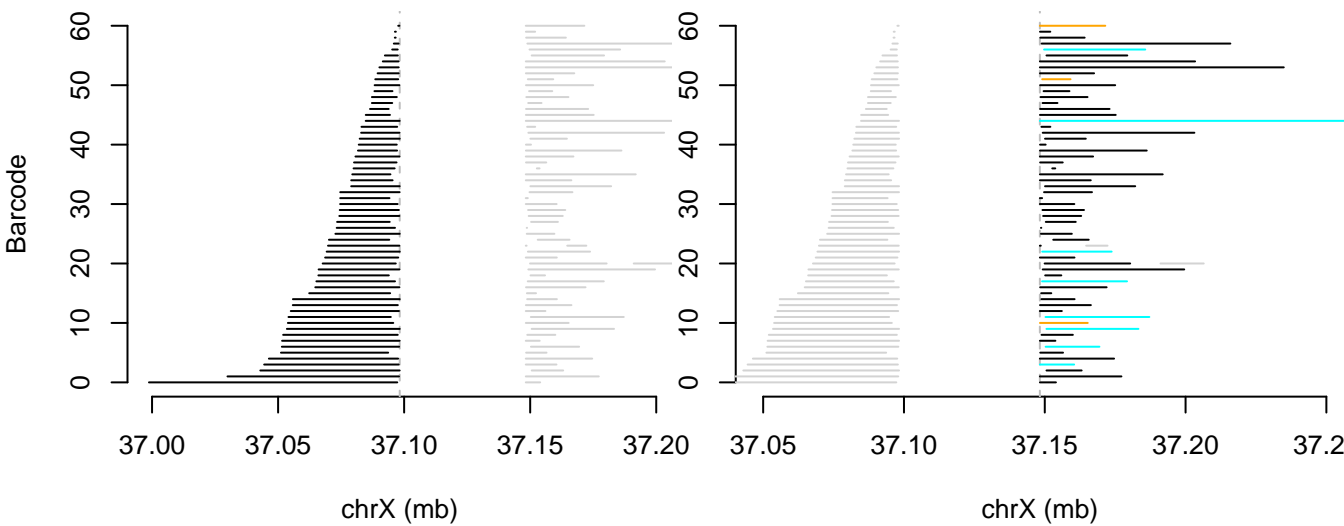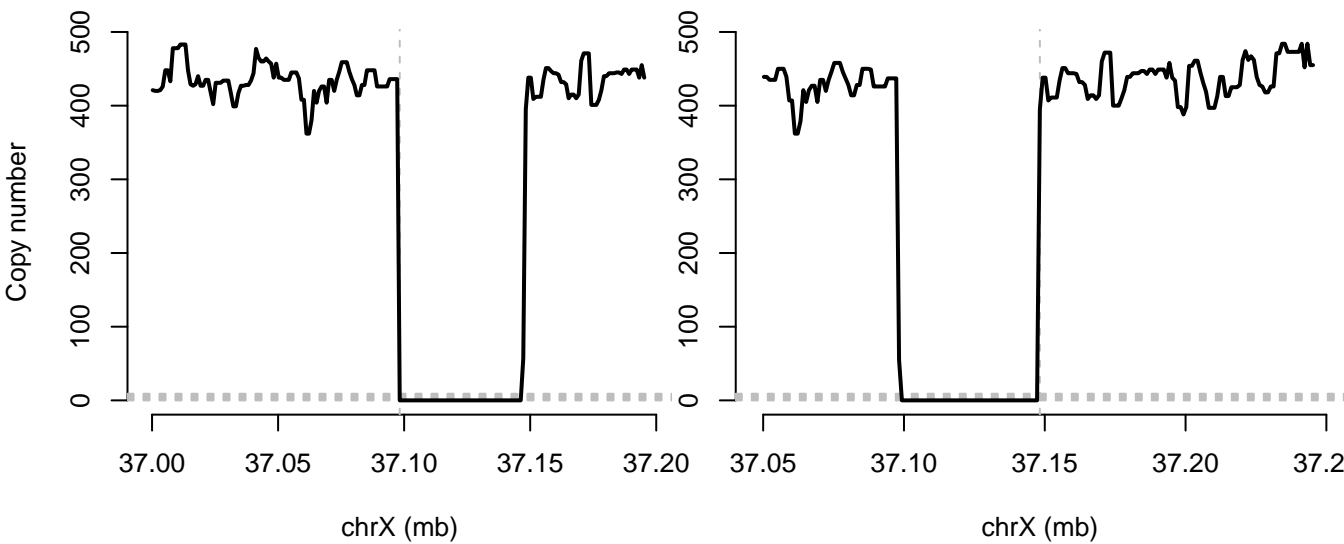

K562 chrX:37,098,257::chrX:37,148,255+-

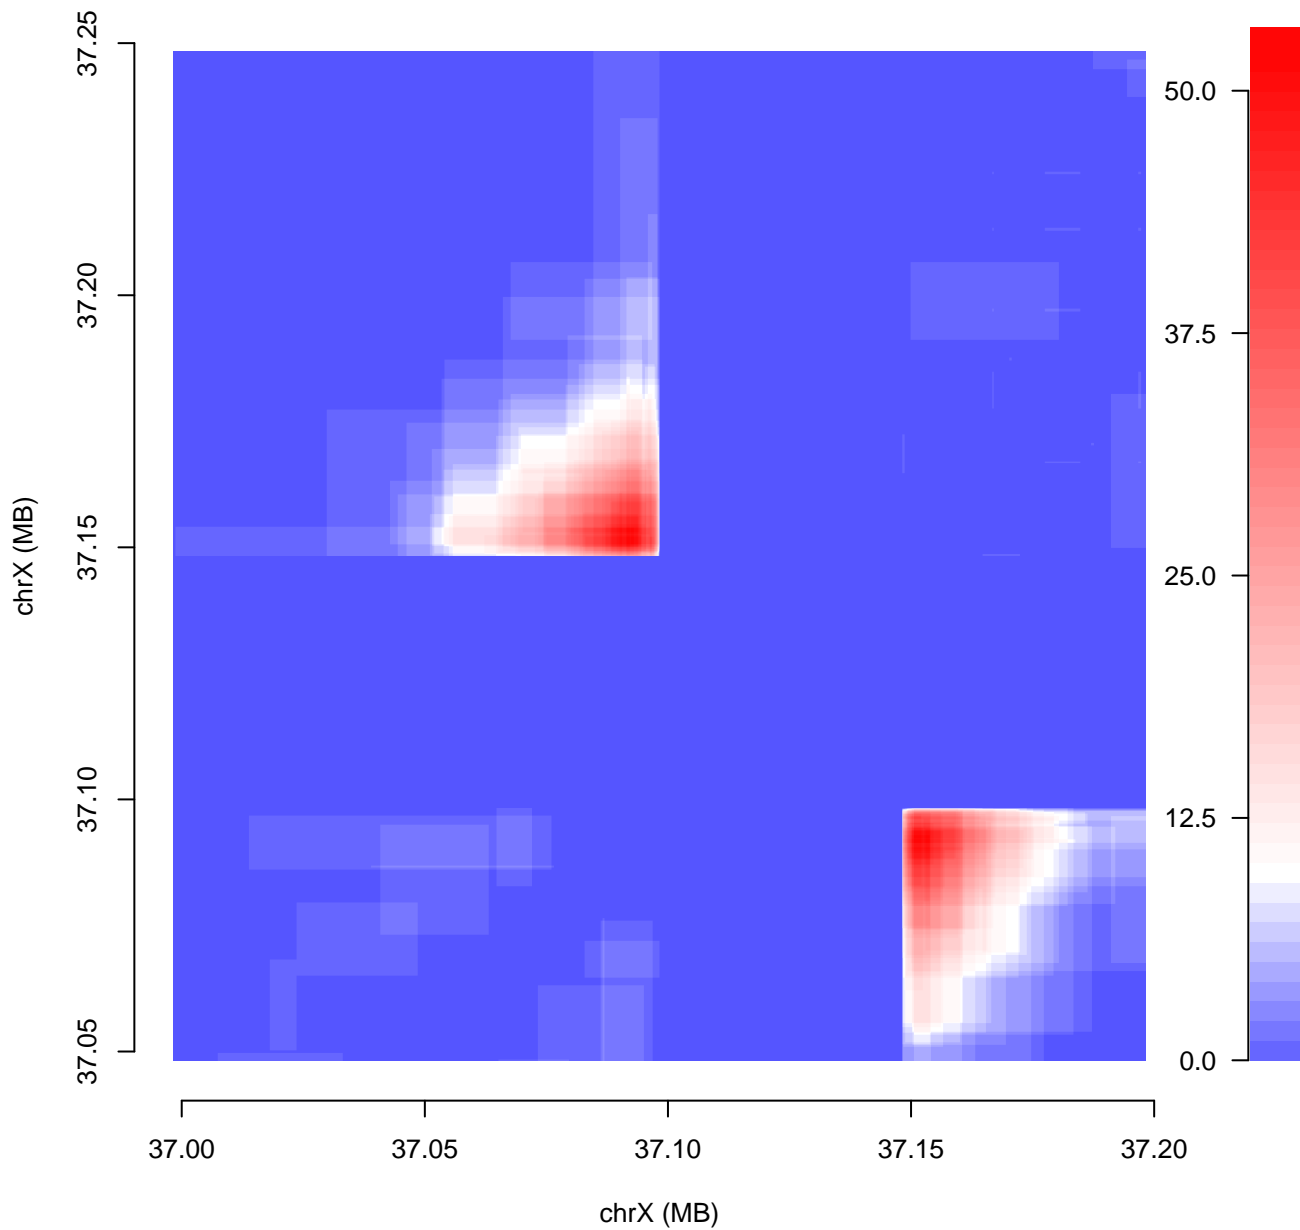

Supplement: Supplemental_Data.zip [file event_218.pdf › event_218.pdf]

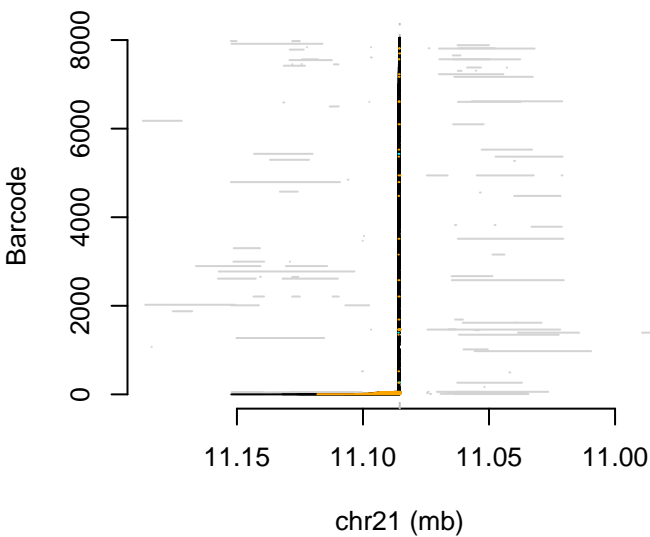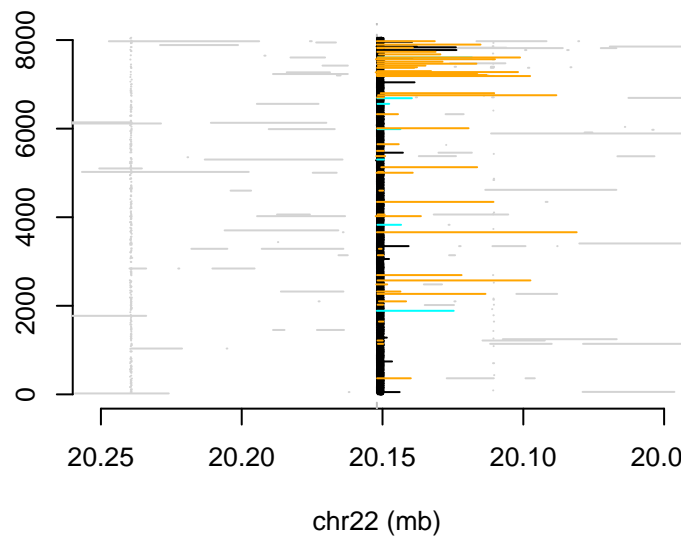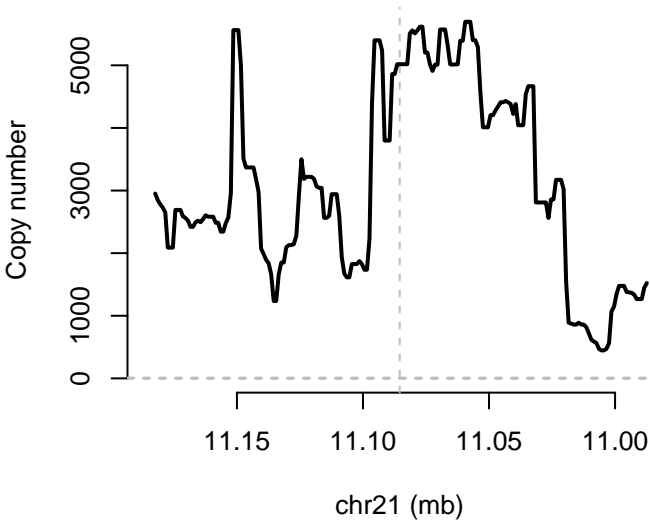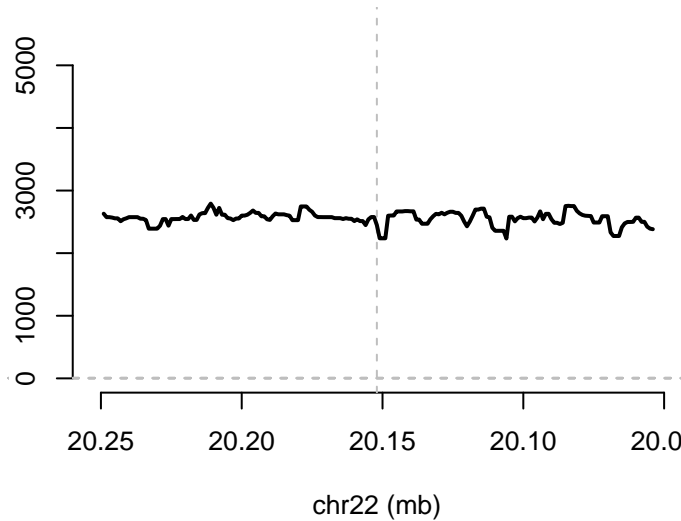

K562 chr21:11,085,415::chr22:20,152,003—+

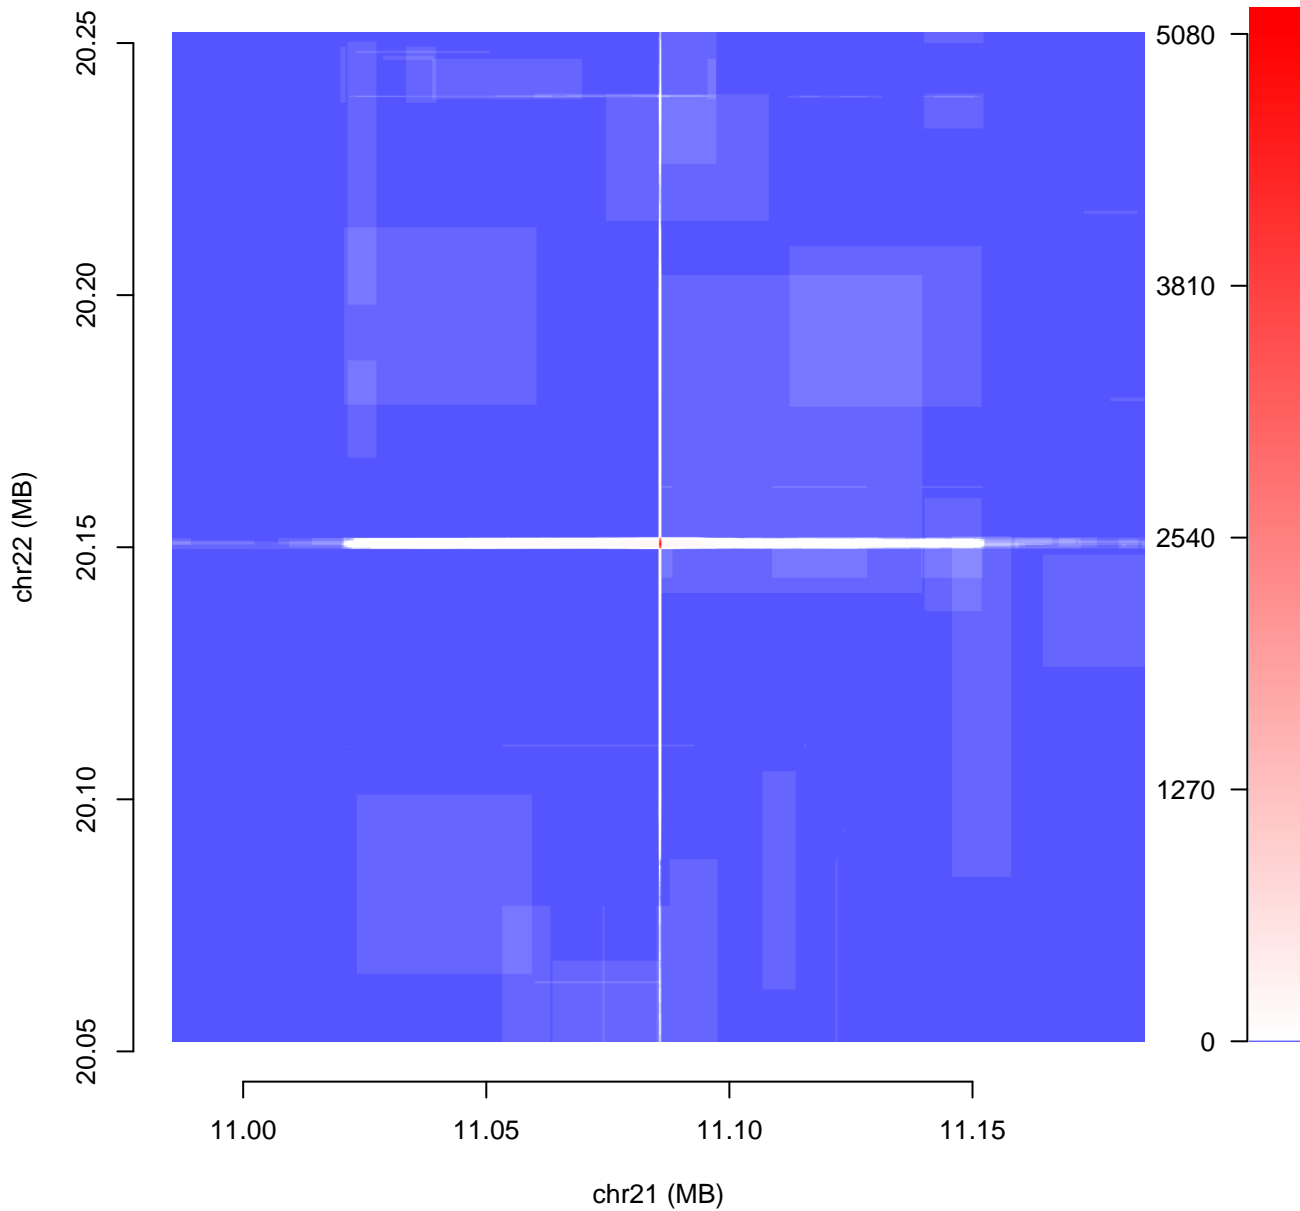

Supplement: Supplemental_Data.zip [file event_219.pdf › event_219.pdf]

Barcode

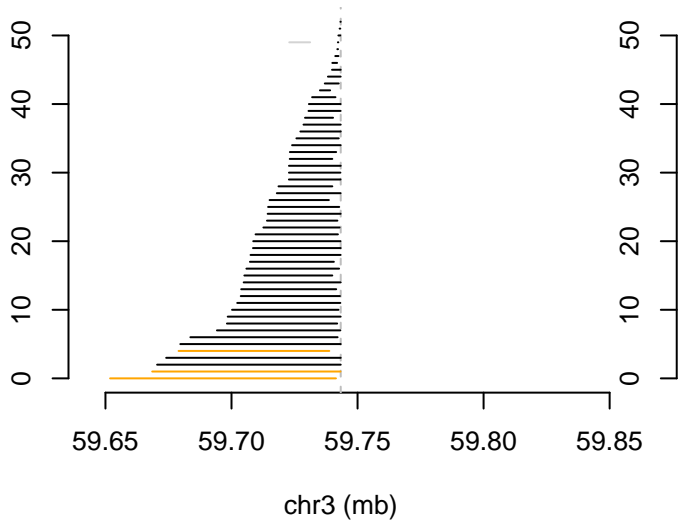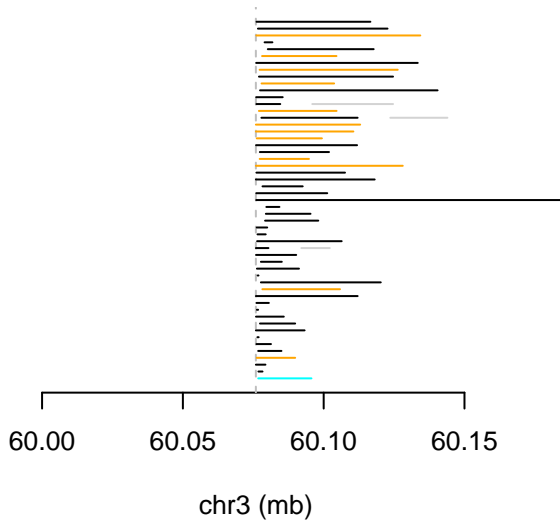

Copy number

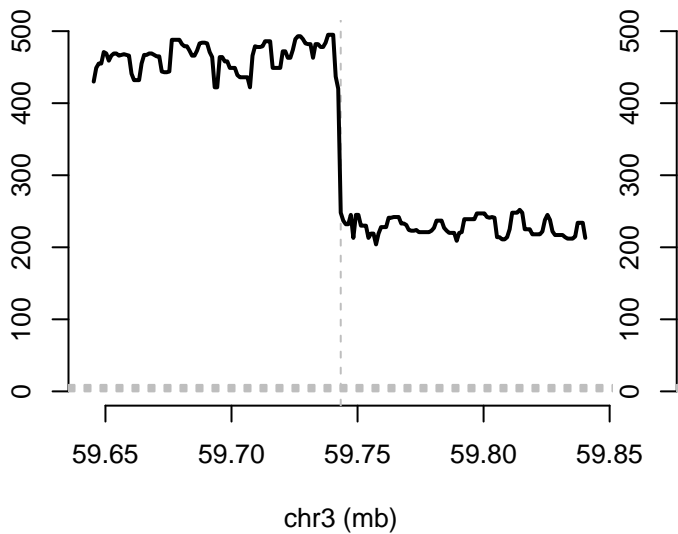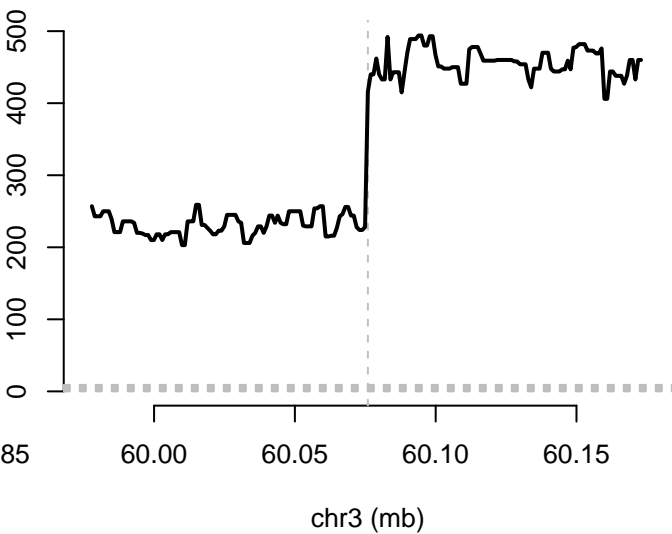

K562 chr3:60,075,919::chr3:59,743,332--+

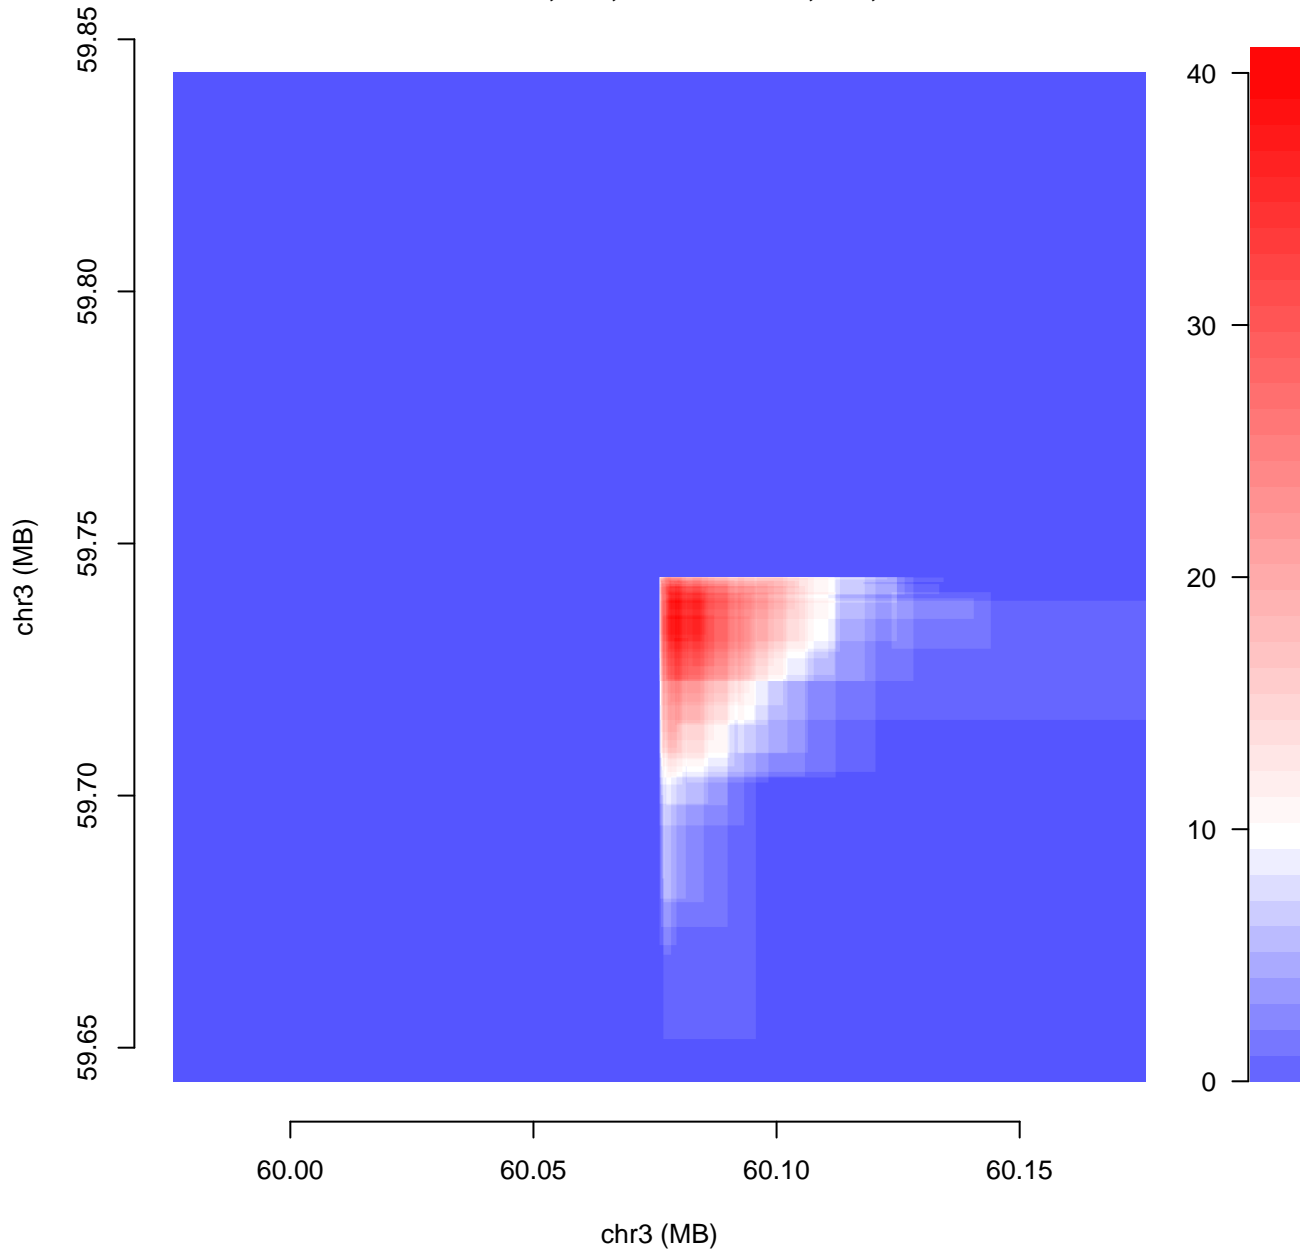

Supplement: Supplemental_Data.zip [file event_22.pdf › event_22.pdf]

Barcode

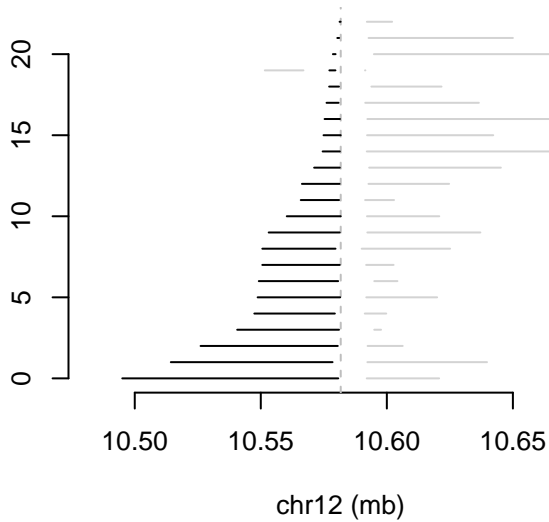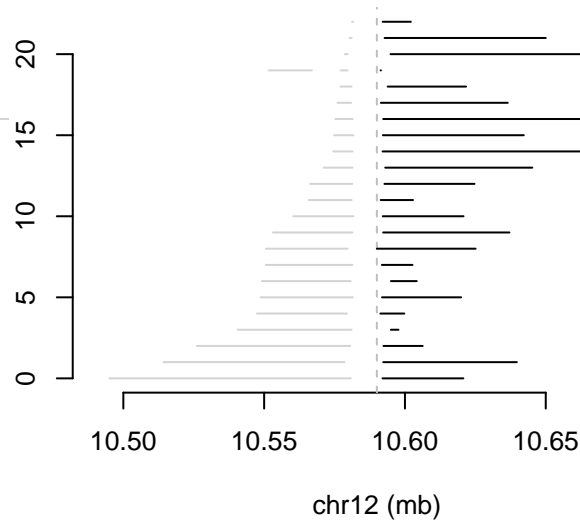

Copy number

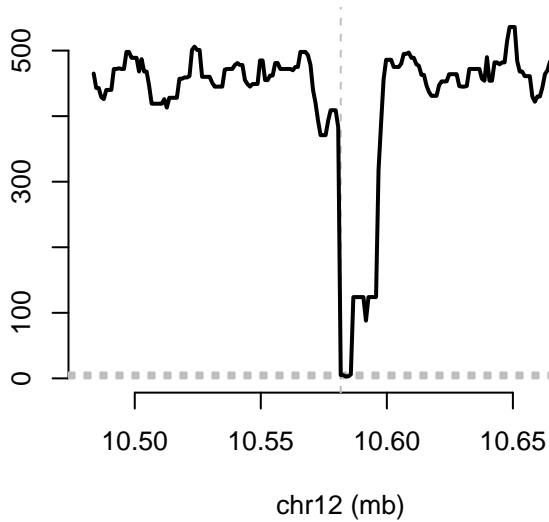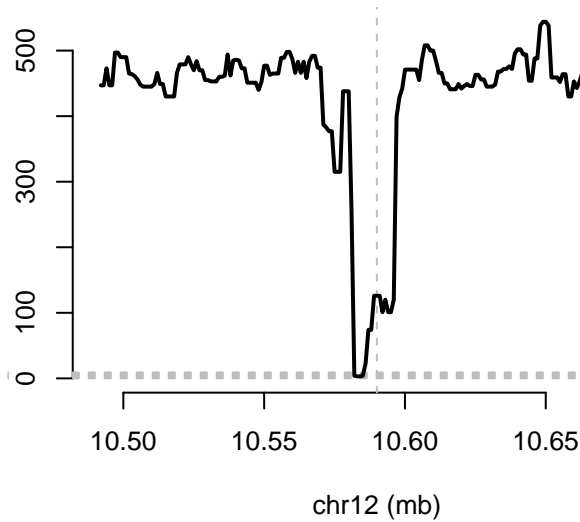

K562 chr12:10,581,716::chr12:10,590,027+-

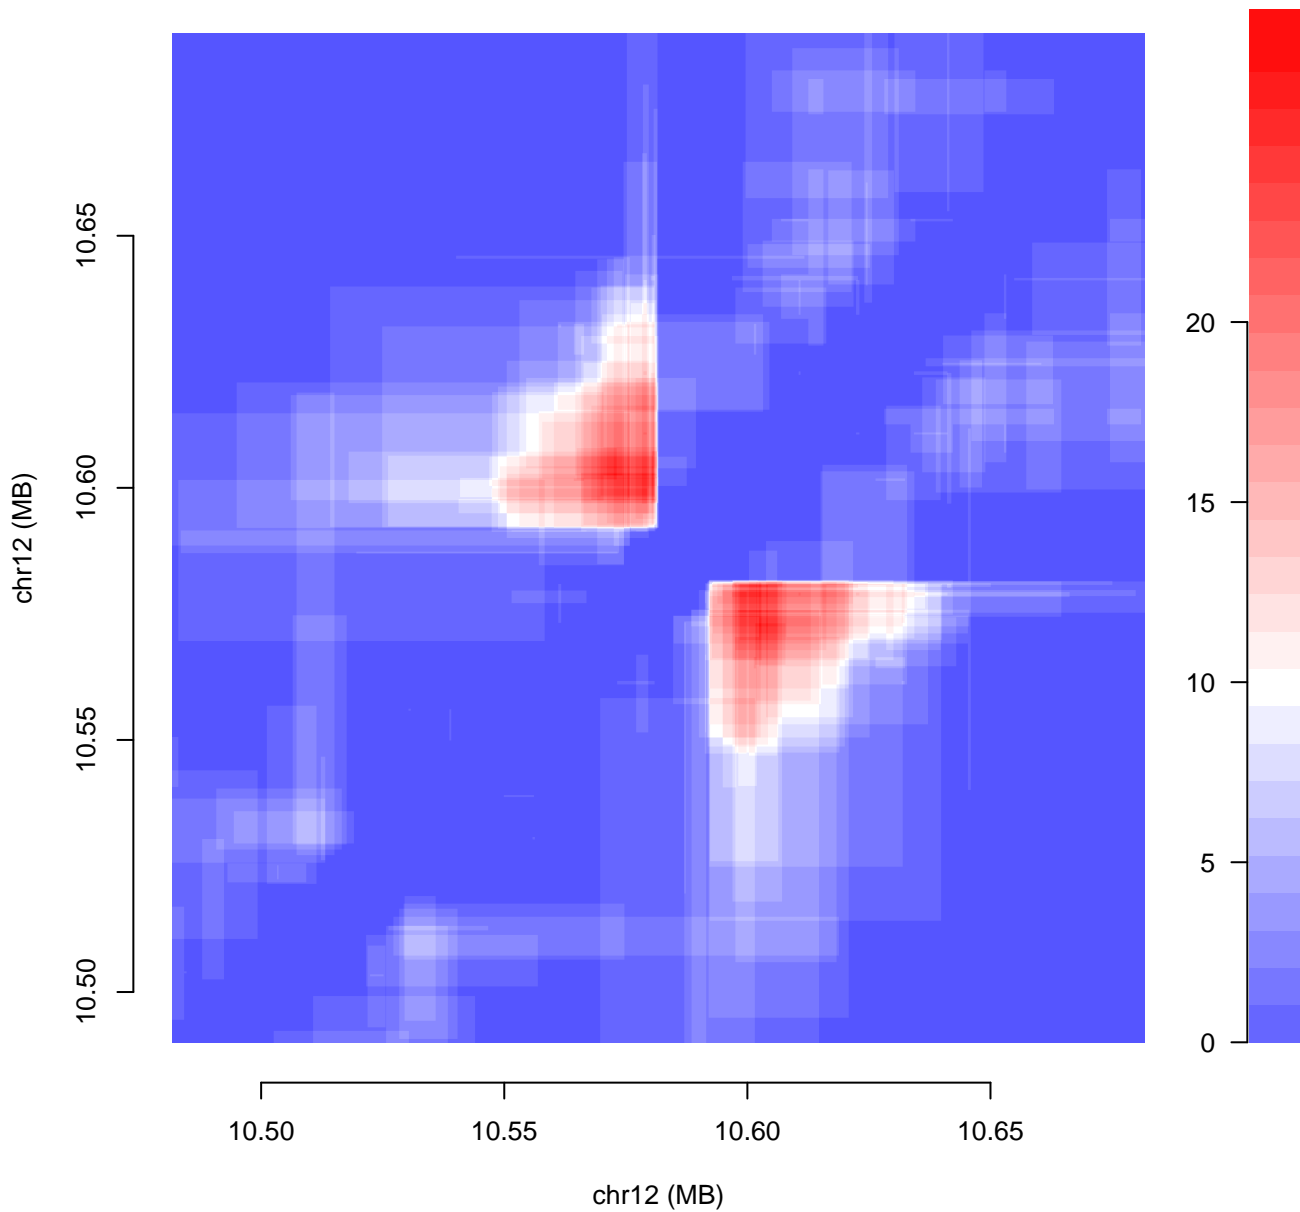

Supplement: Supplemental_Data.zip [file event_220.pdf › event_220.pdf]

Barcode

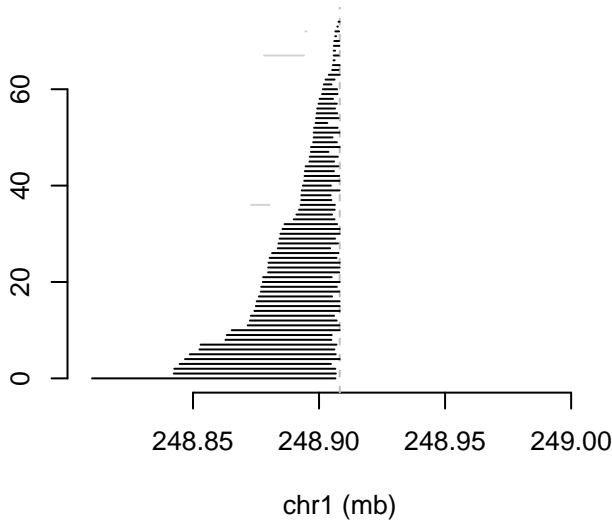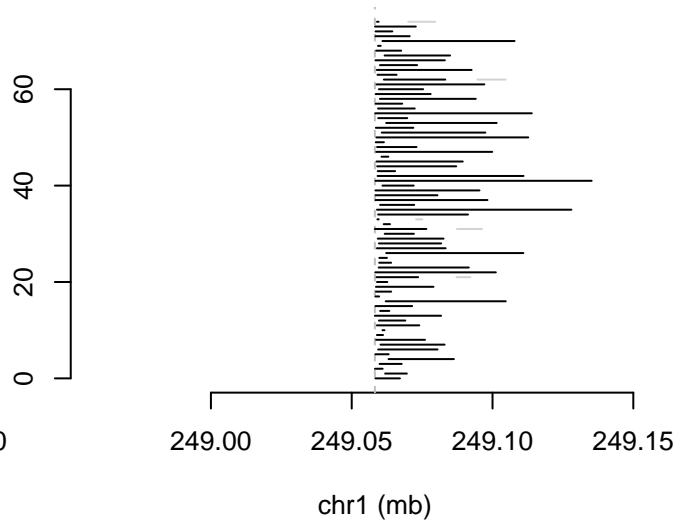

Copy number

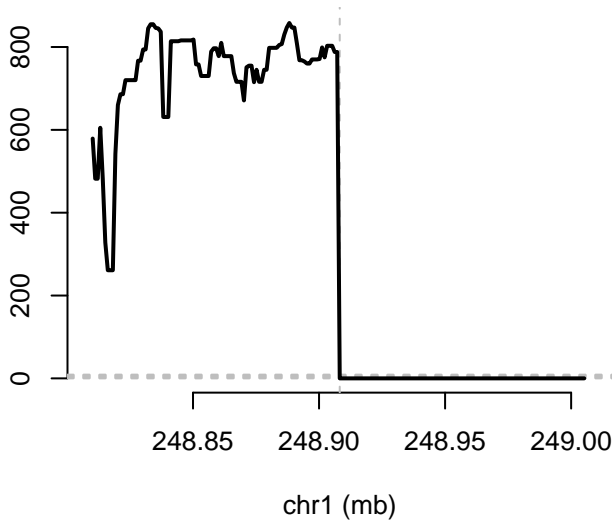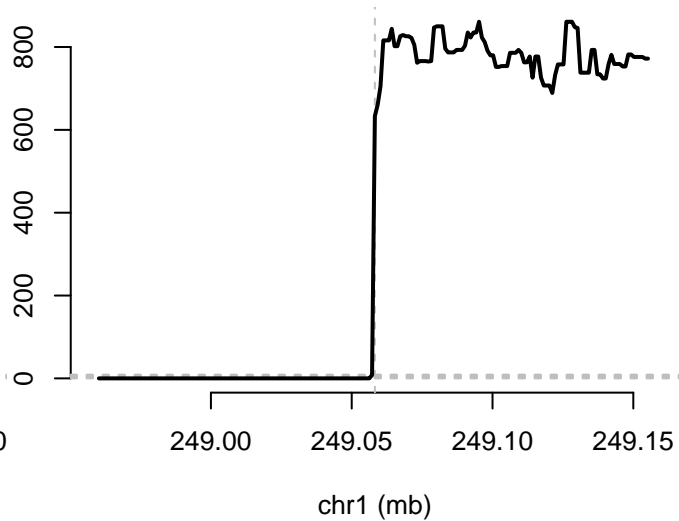

K562 chr1:249,058,221::chr1:248,908,210-+

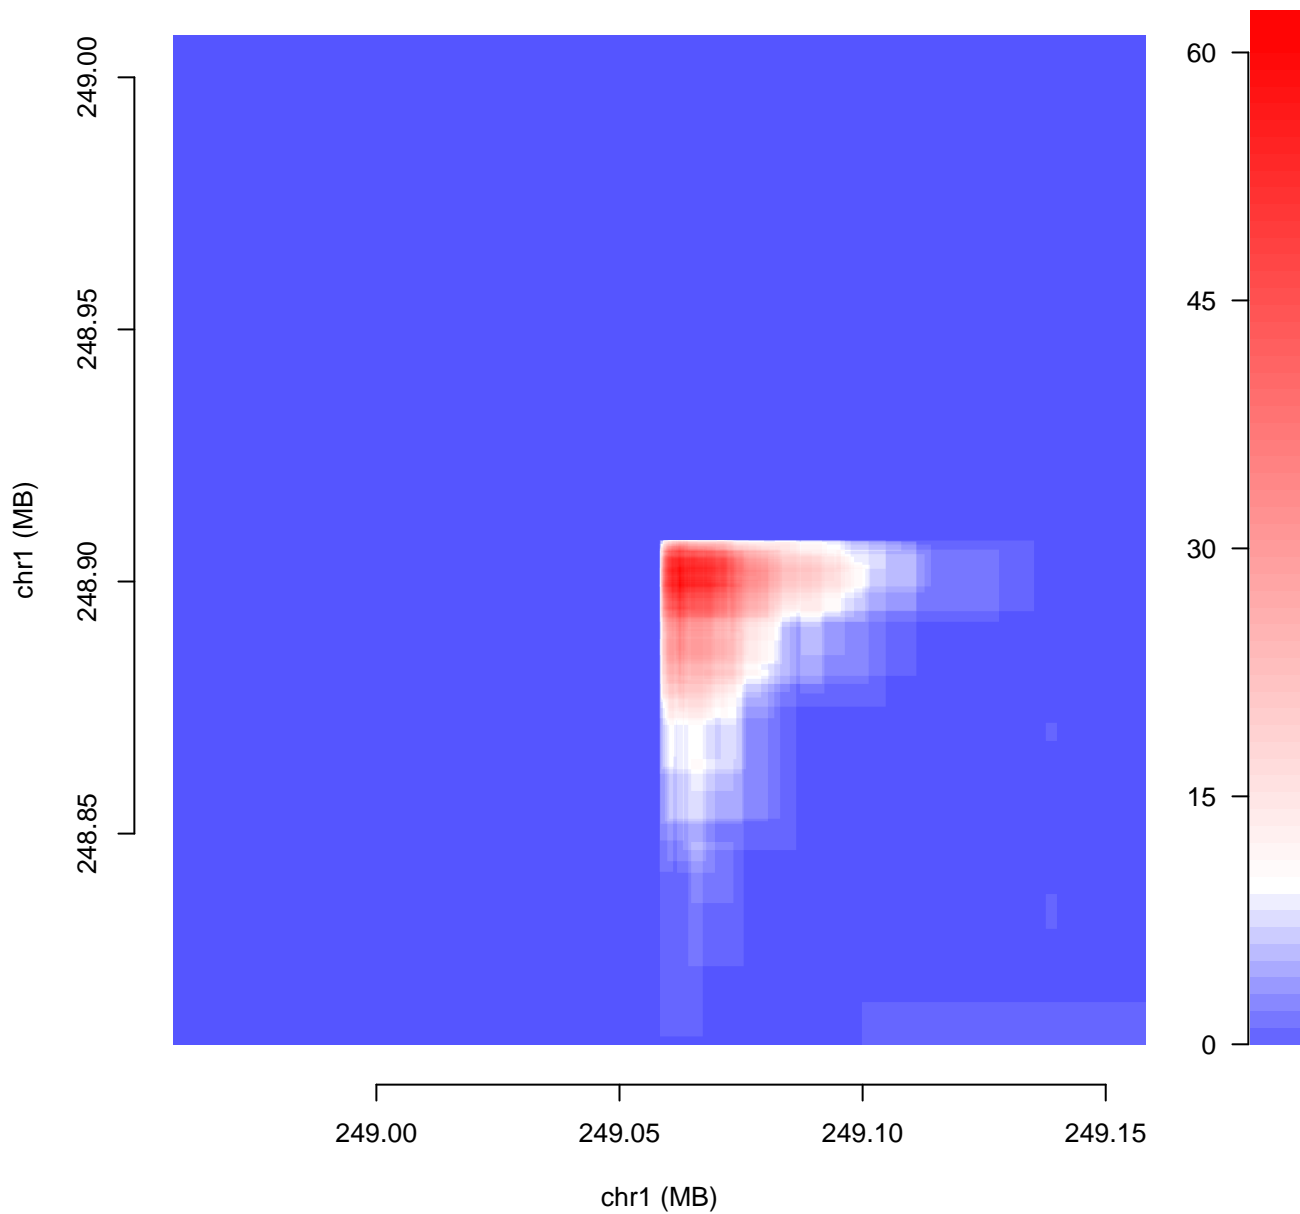

Supplement: Supplemental_Data.zip [file event_221.pdf › event_221.pdf]

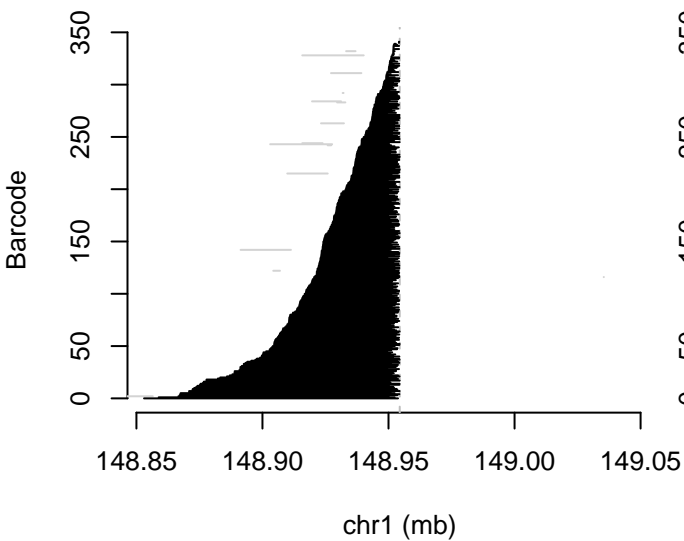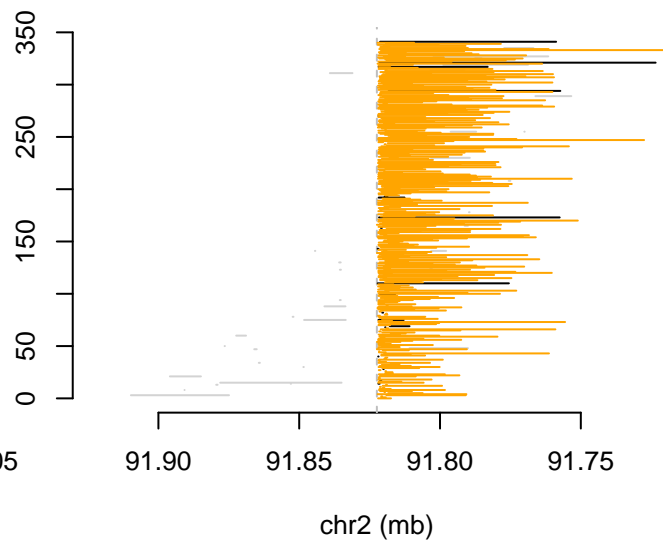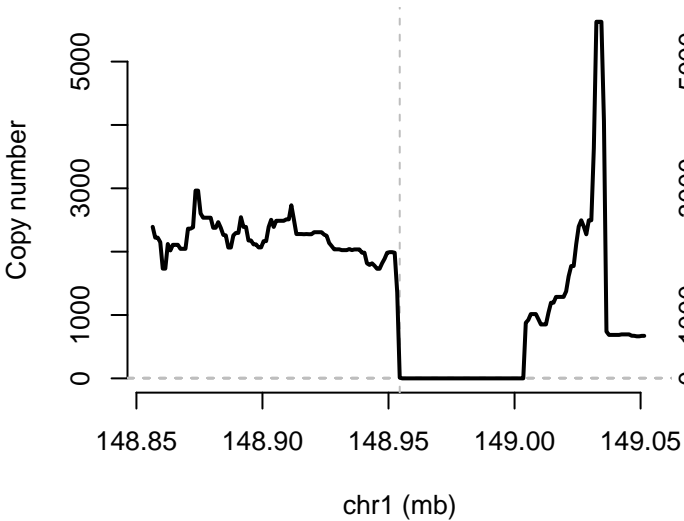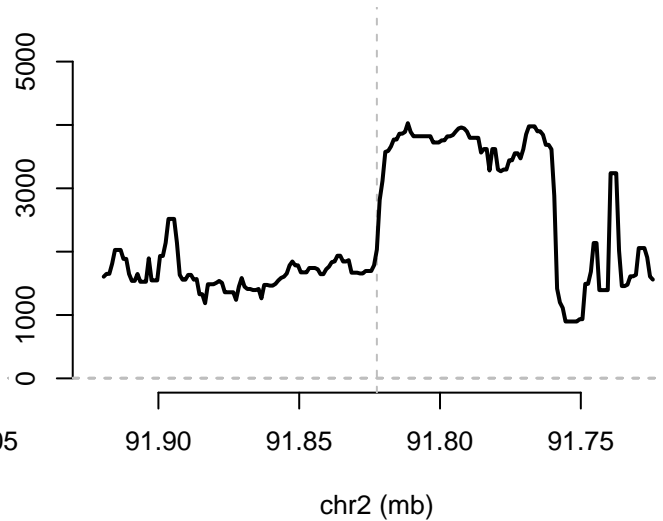

K562 chr2:91,822,418::chr1:148,954,456++

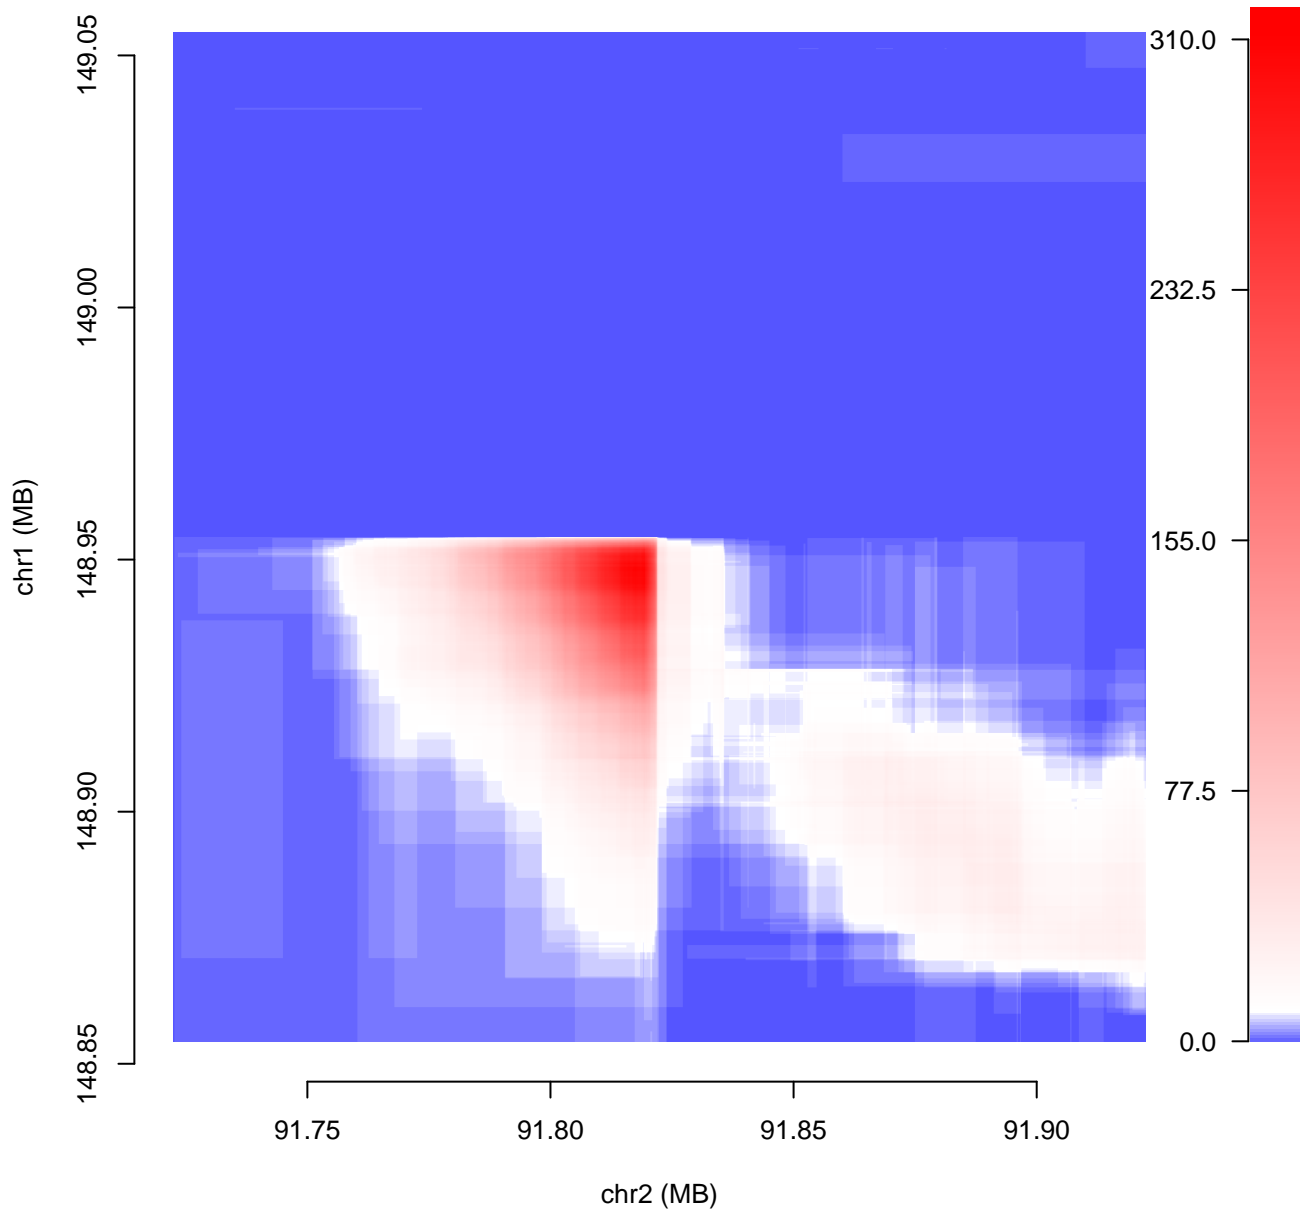

Supplement: Supplemental_Data.zip [file event_222.pdf › event_222.pdf]

Barcode

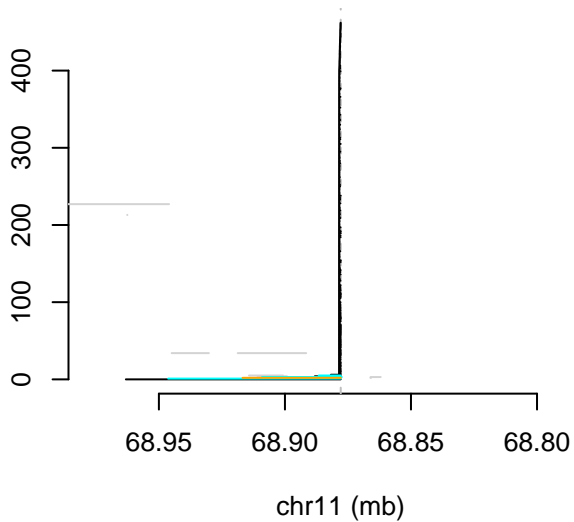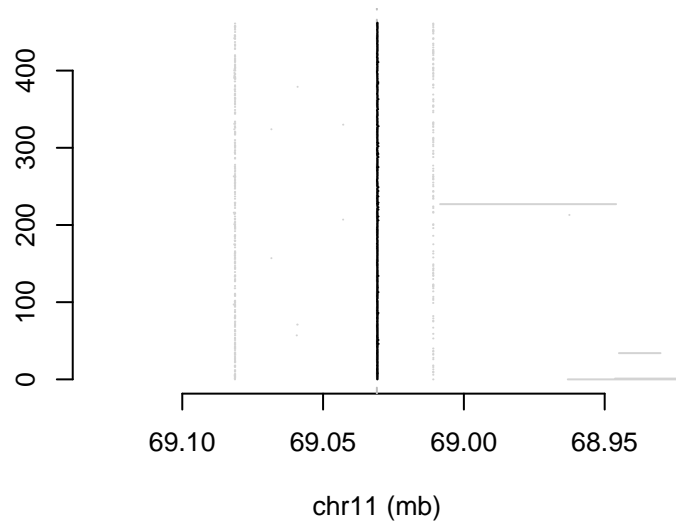

Copy number

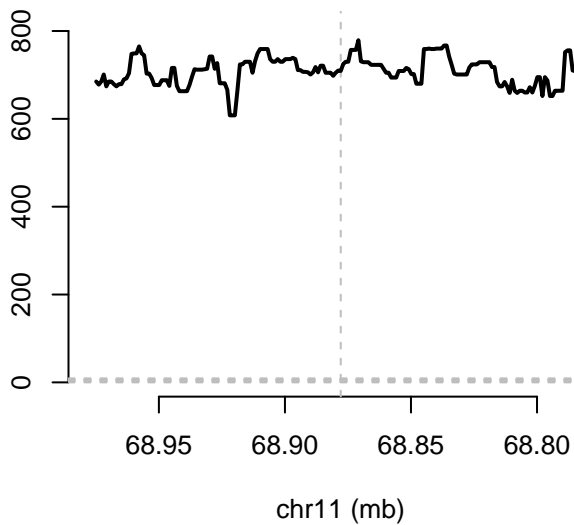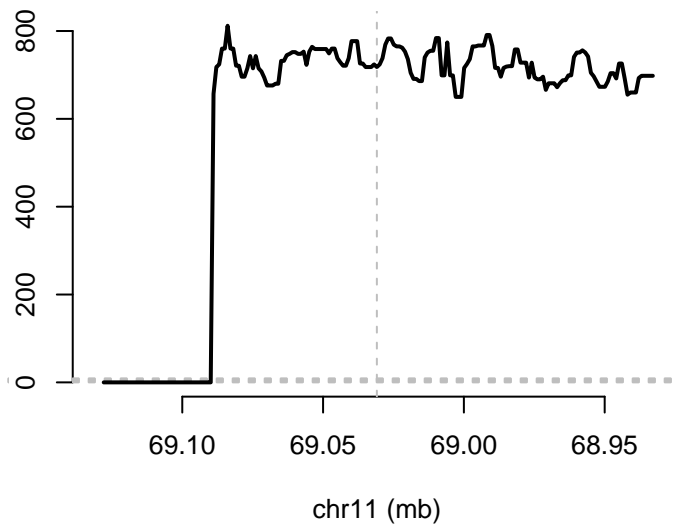

K562 chr11:69,030,901::chr11:68,877,861+-

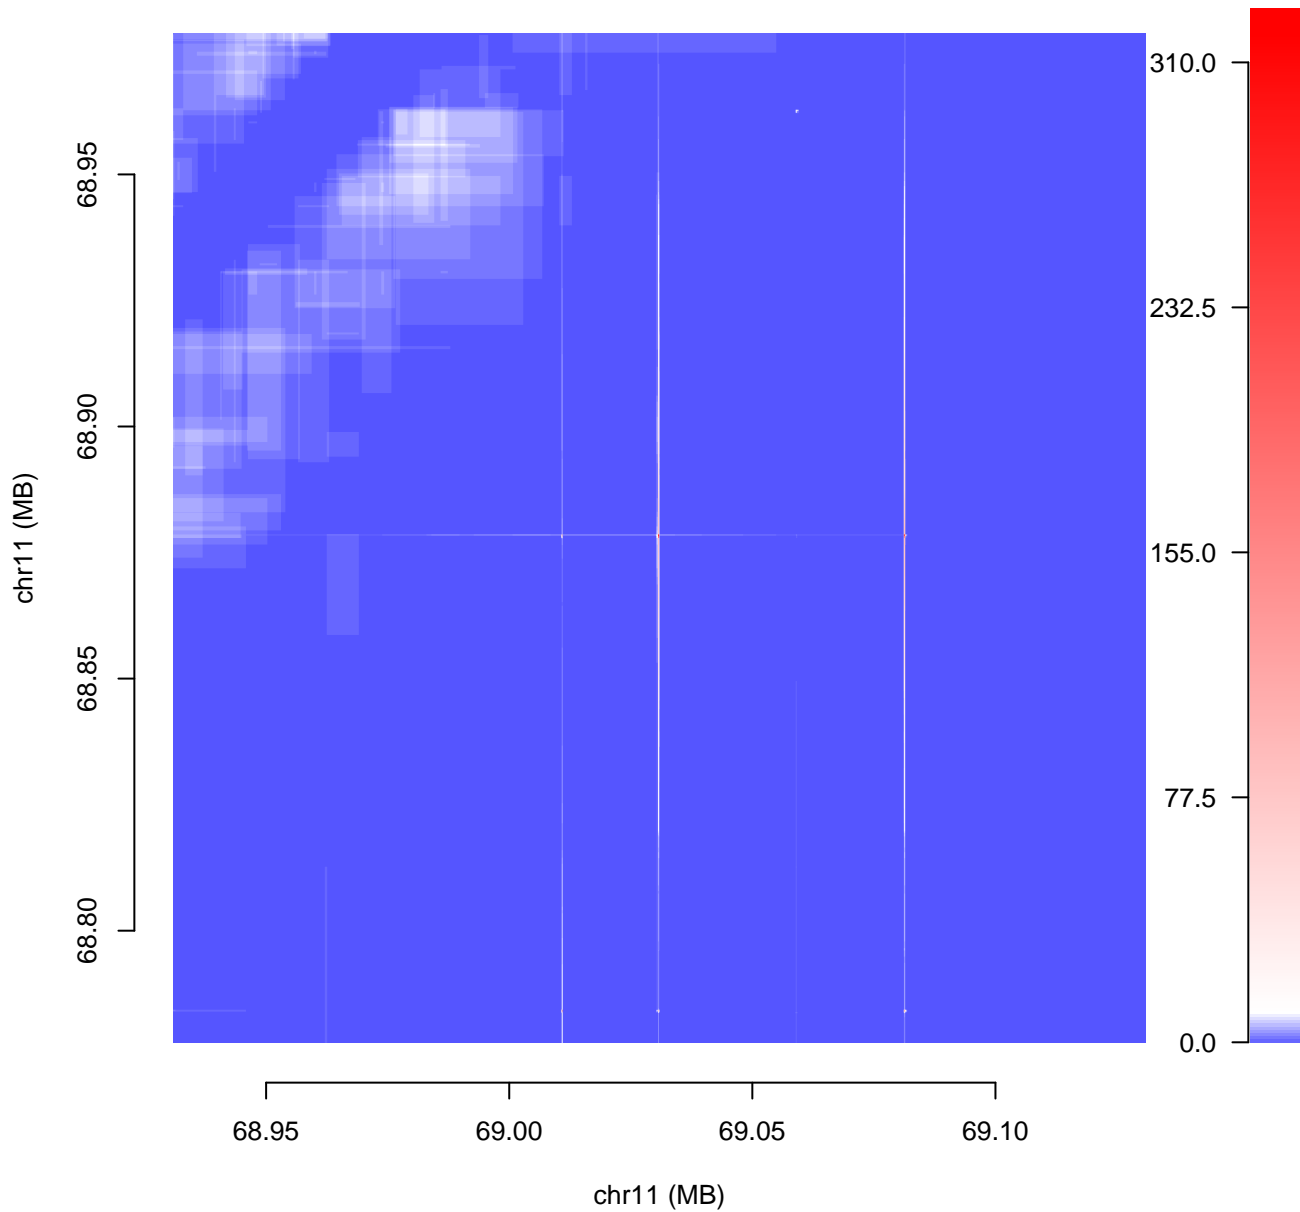

Supplement: Supplemental_Data.zip [file event_223.pdf › event_223.pdf]

Barcode

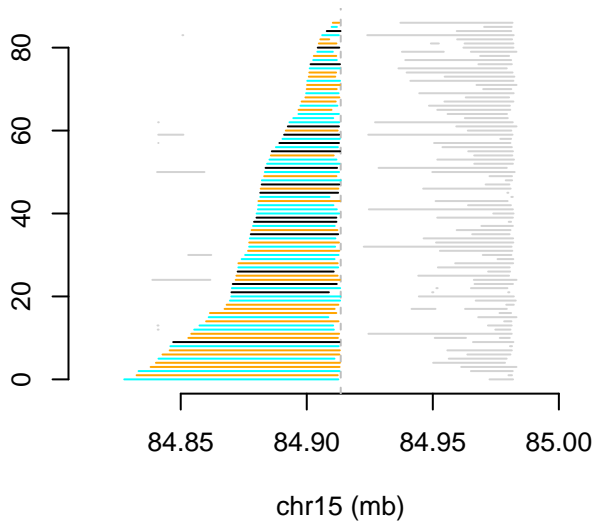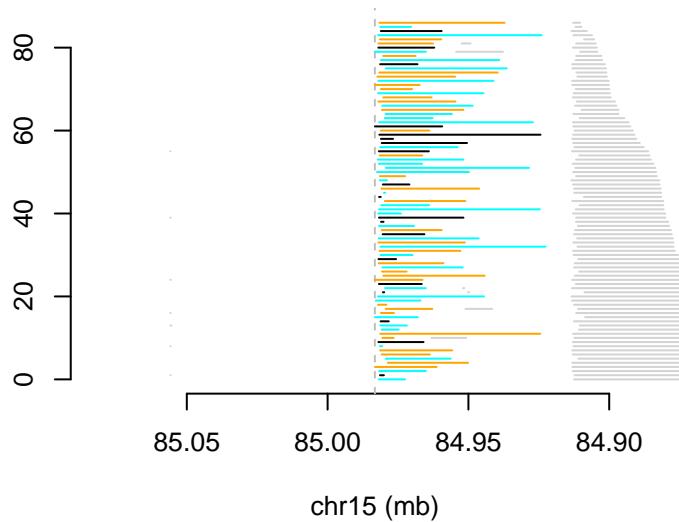

Copy number

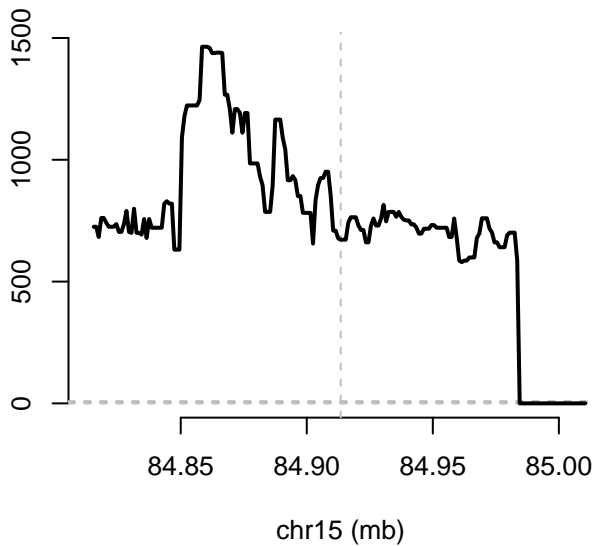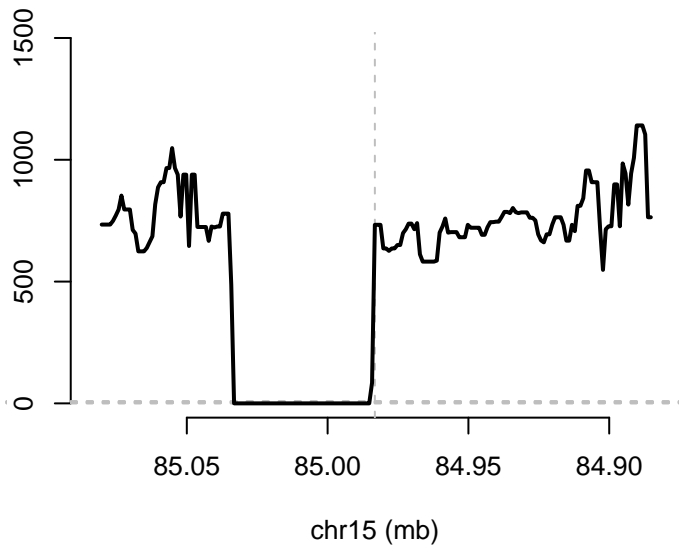

K562 chr15:84,983,218::chr15:84,913,477++

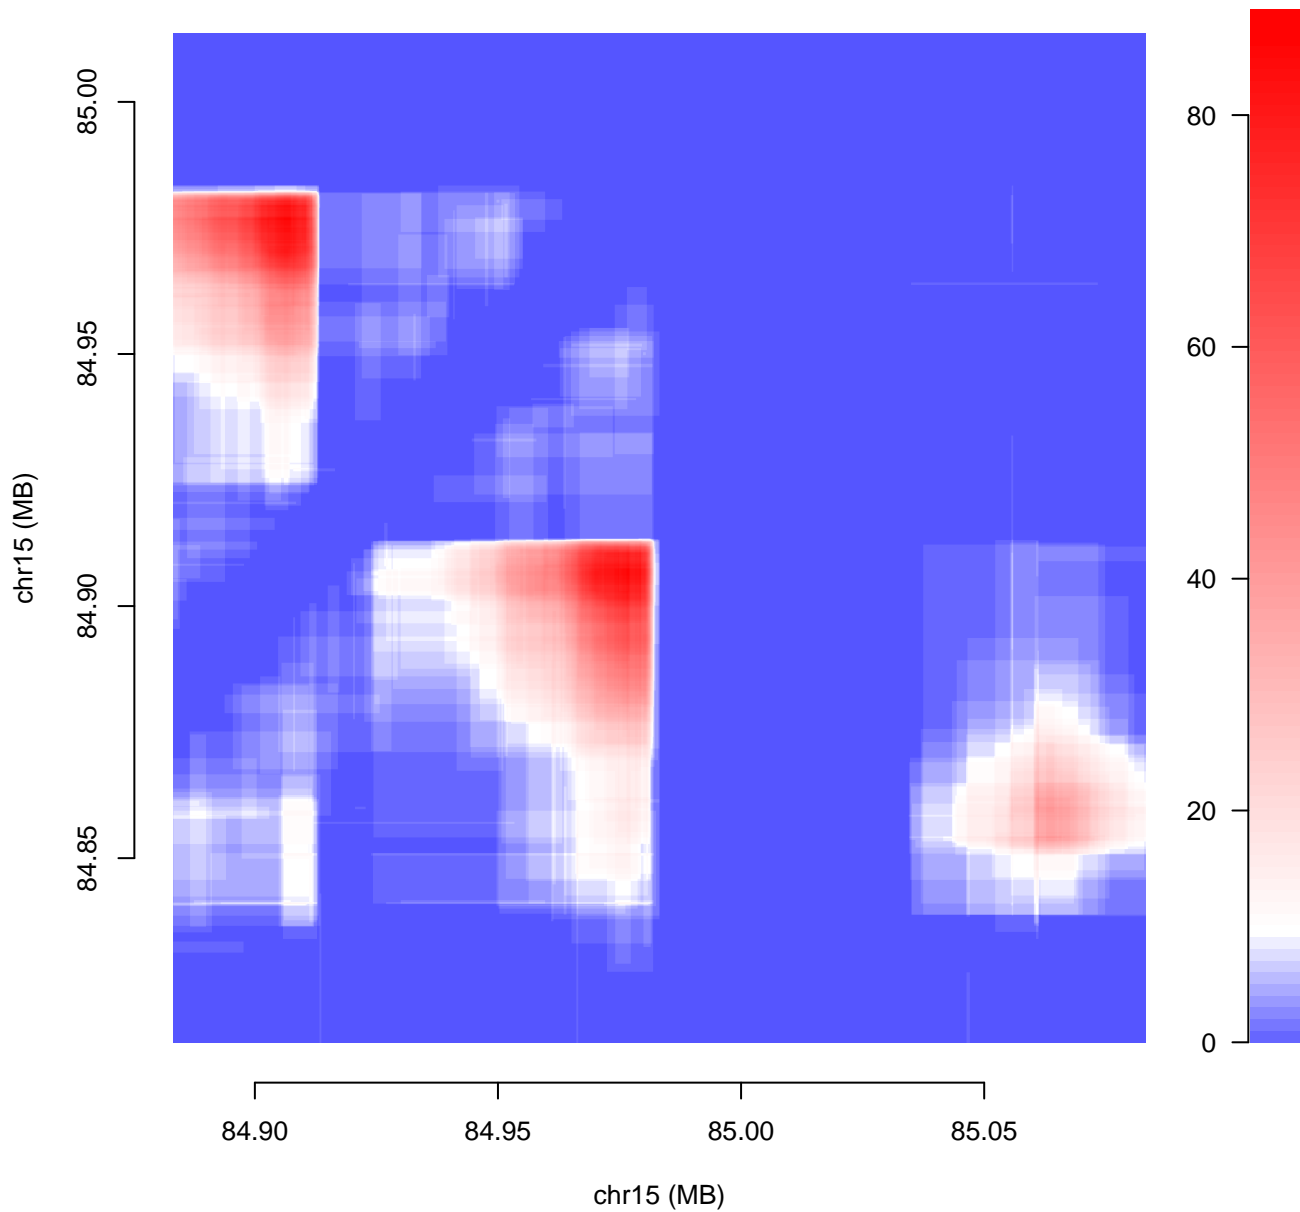

Supplement: Supplemental_Data.zip [file event_224.pdf › event_224.pdf]

Barcode

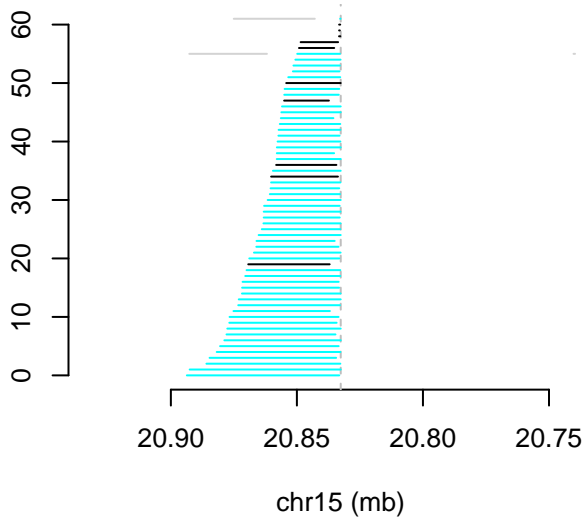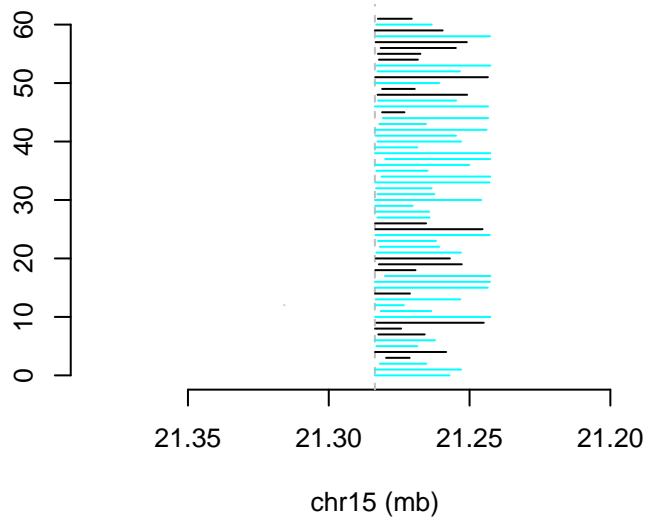

Copy number

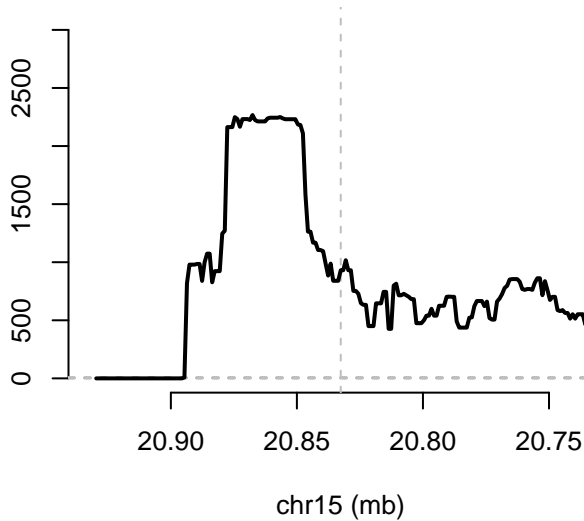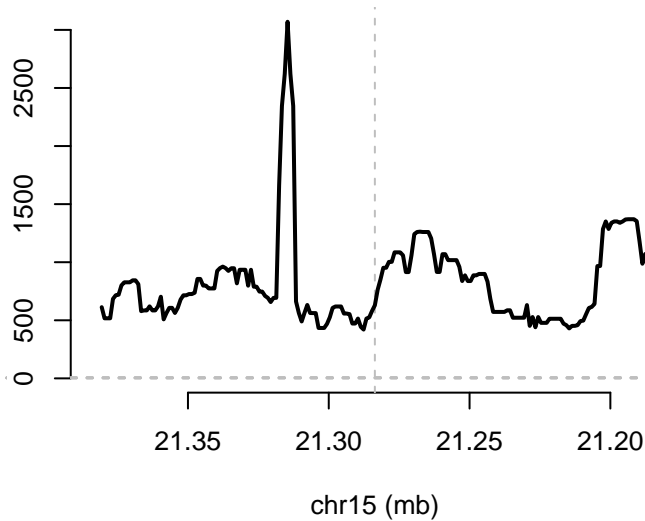

K562 chr15:20,832,609::chr15:21,283,624-+

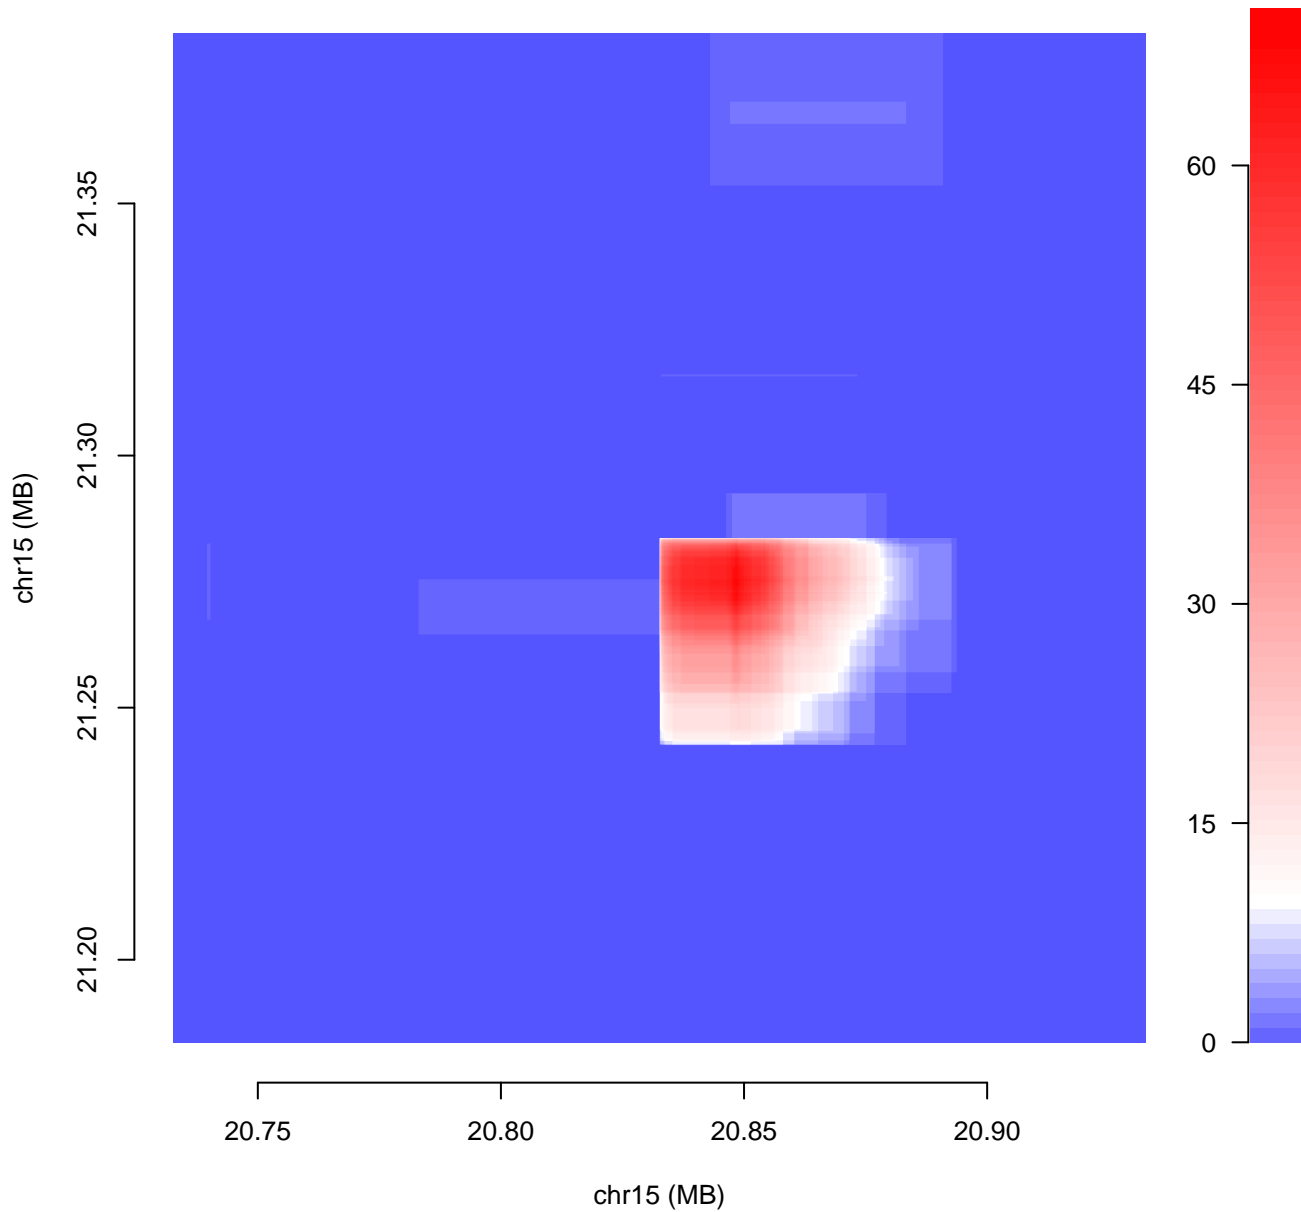

Supplement: Supplemental_Data.zip [file event_225.pdf › event_225.pdf]

Barcode

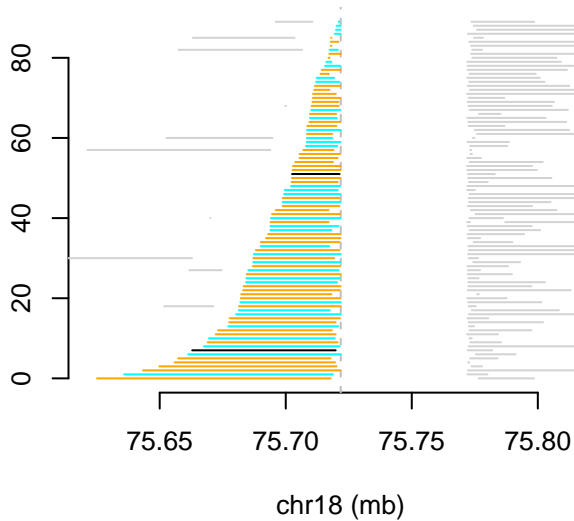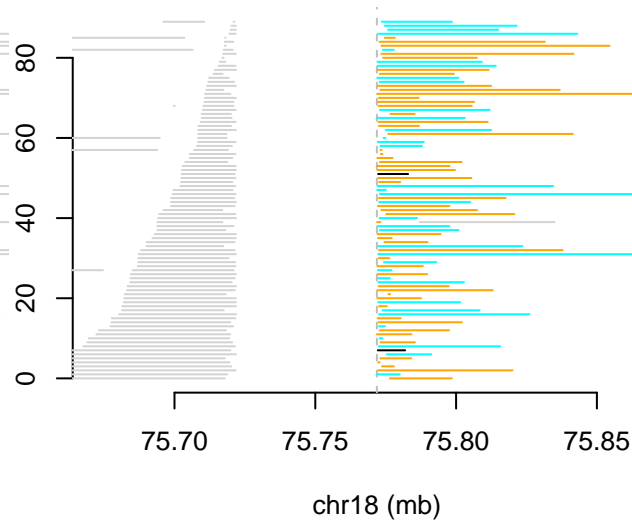

Copy number

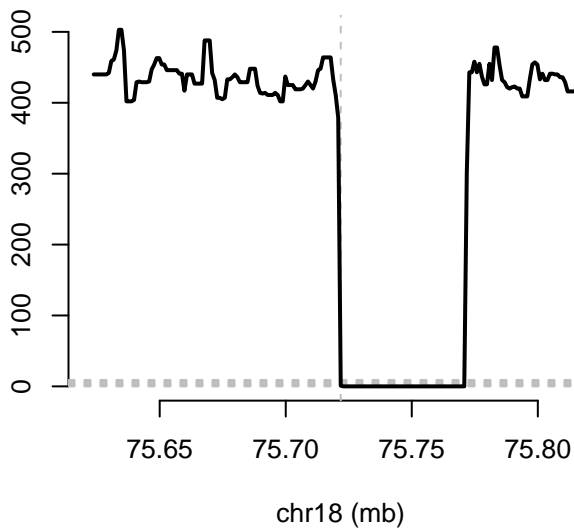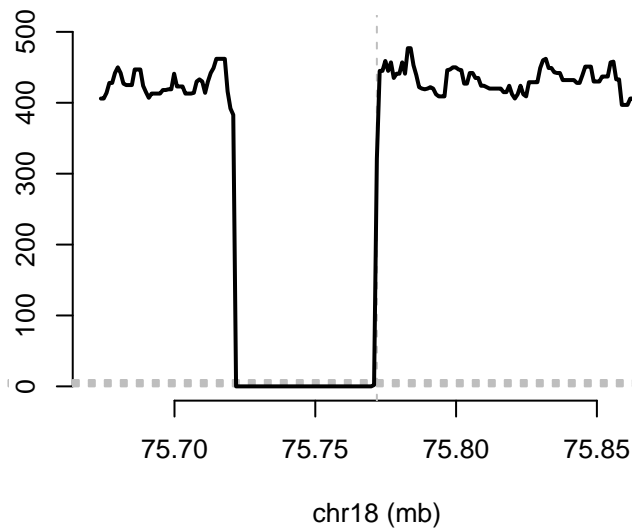

K562 chr18:75,721,820::chr18:75,771,864+-

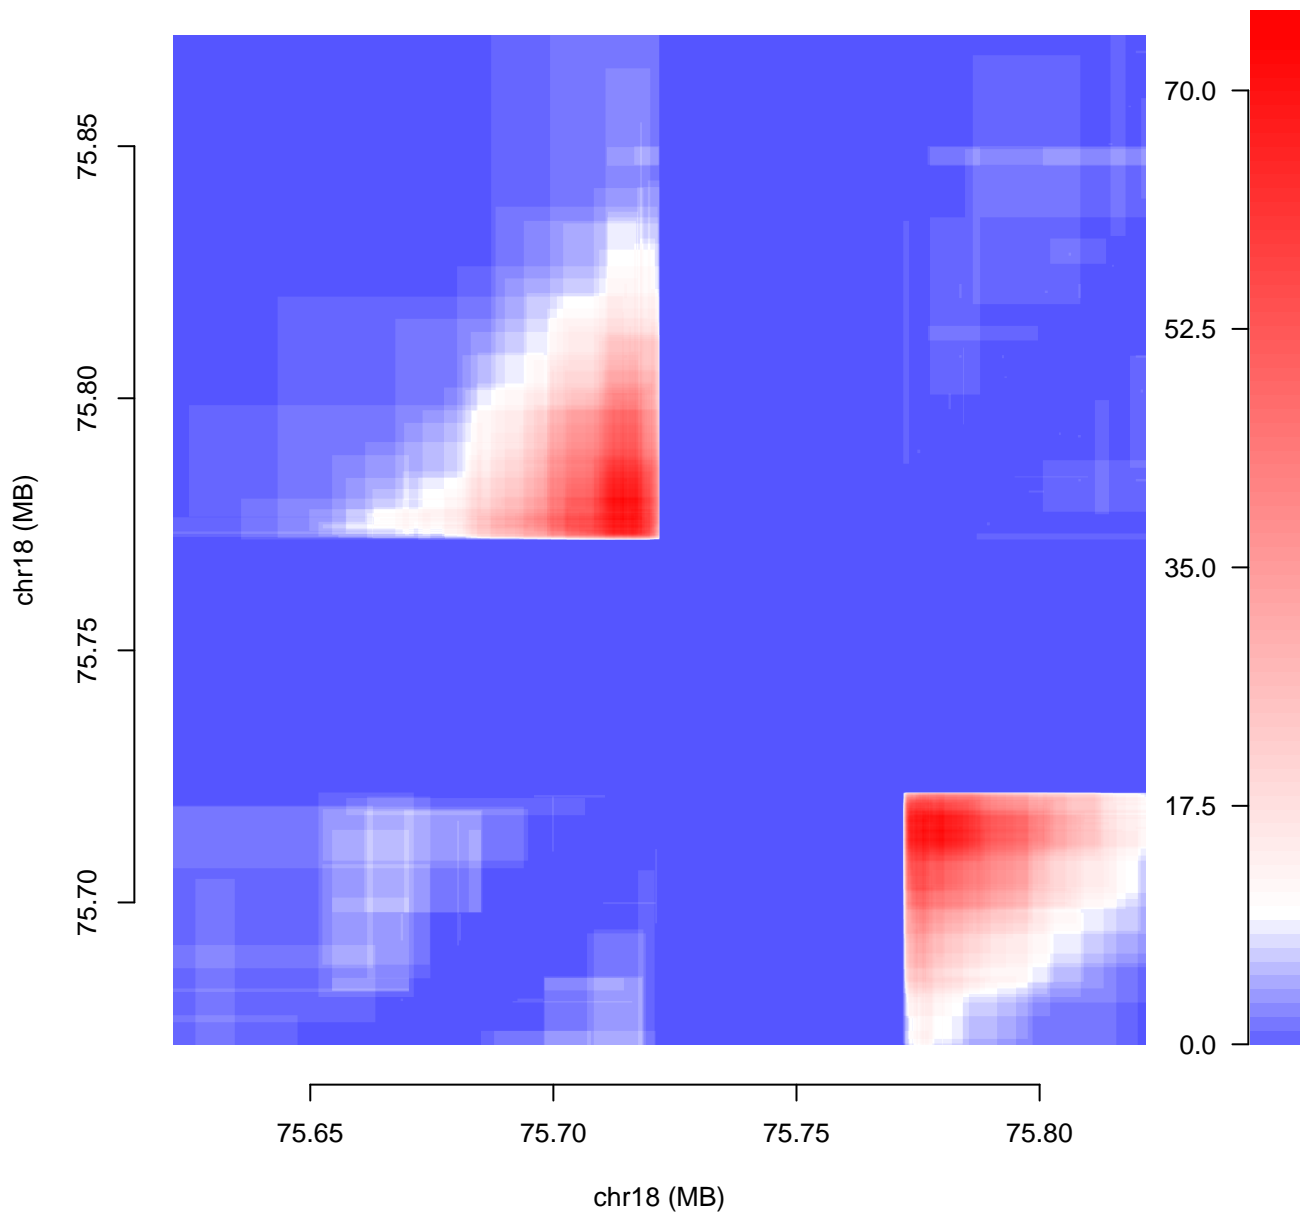

Supplement: Supplemental_Data.zip [file event_226.pdf › event_226.pdf]

Barcode

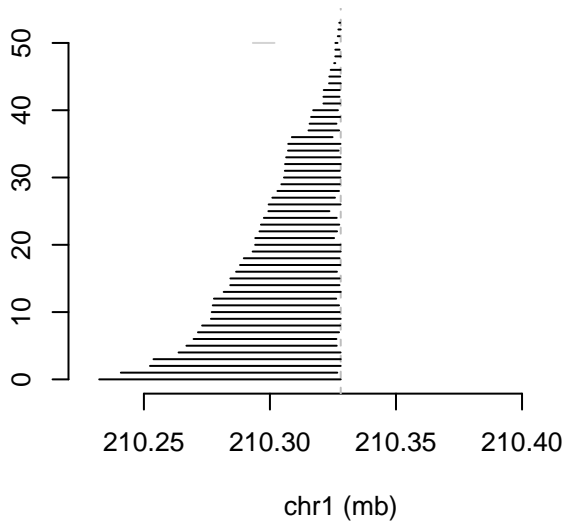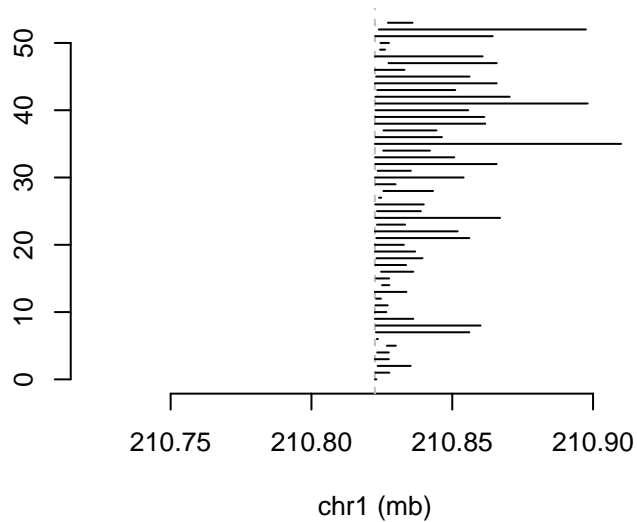

Copy number

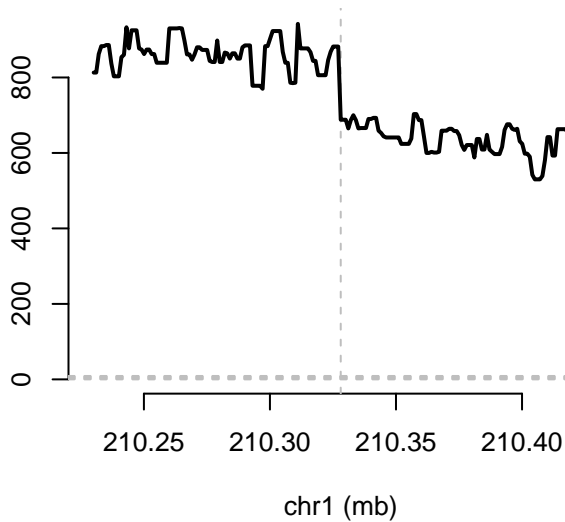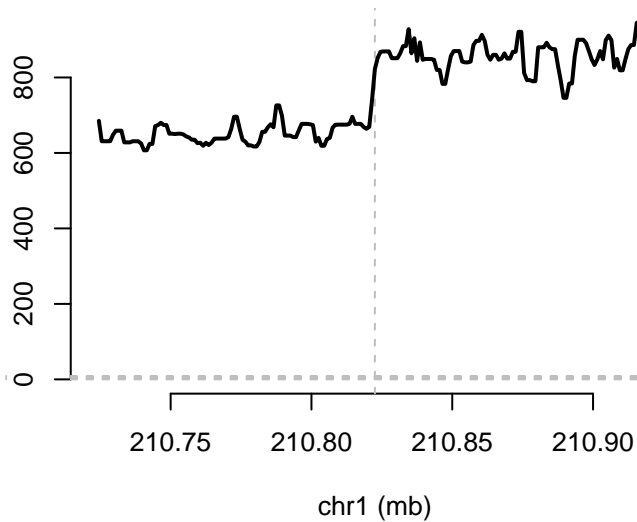

K562 chr1:210,328,086::chr1:210,822,520+-

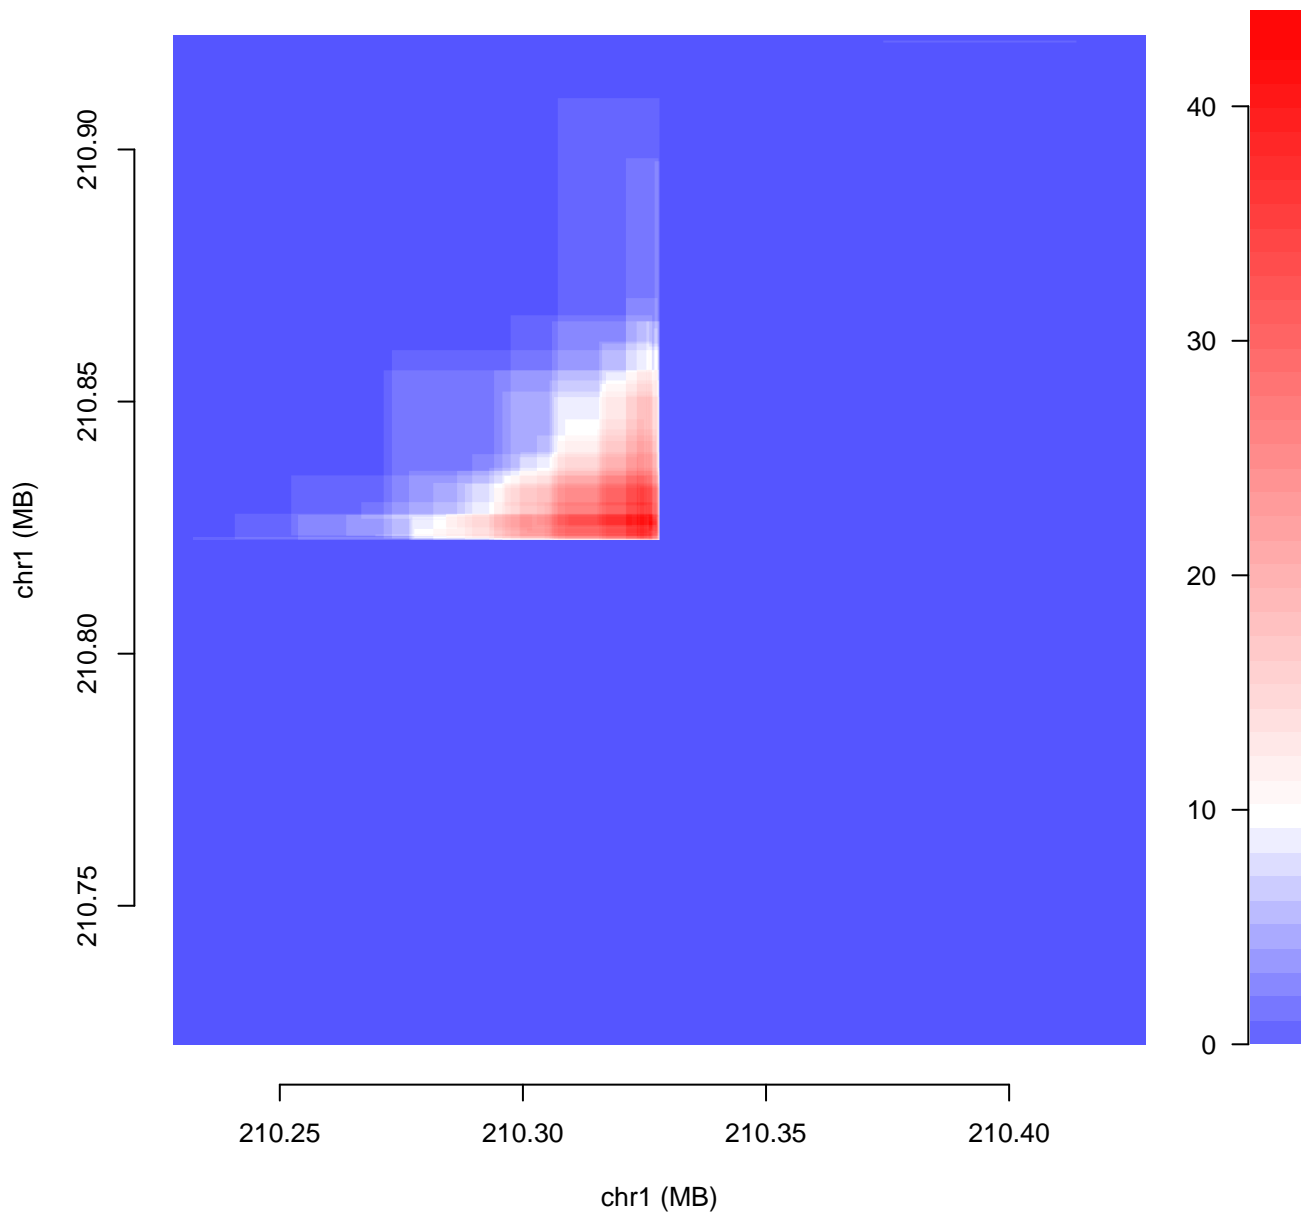

Supplement: Supplemental_Data.zip [file event_227.pdf › event_227.pdf]

Barcode

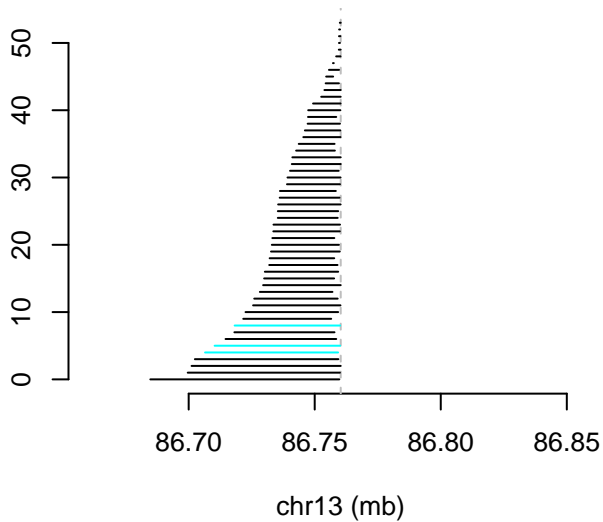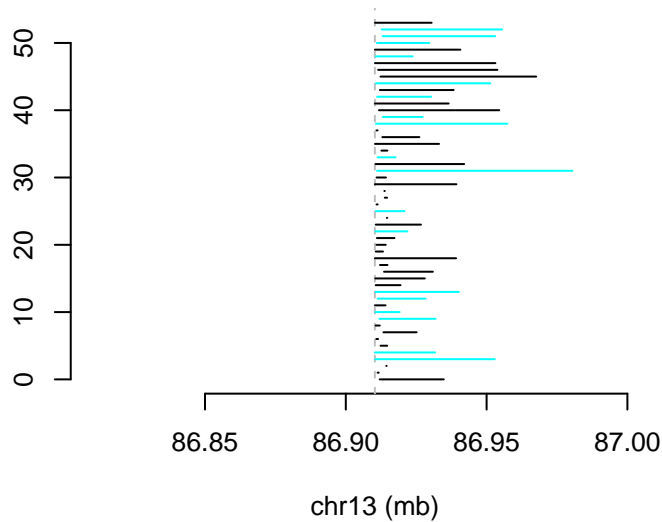

Copy number

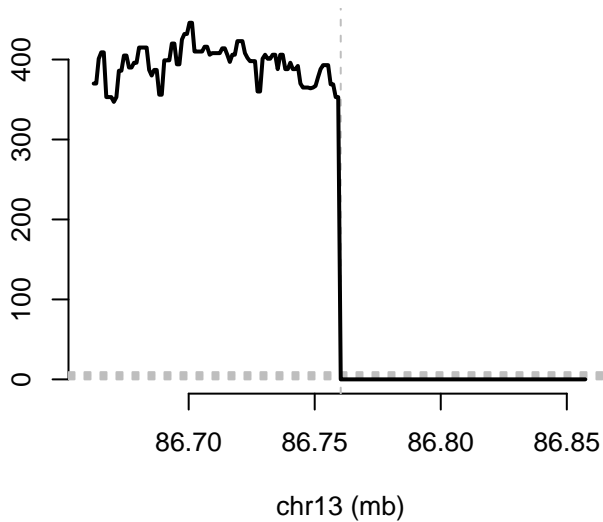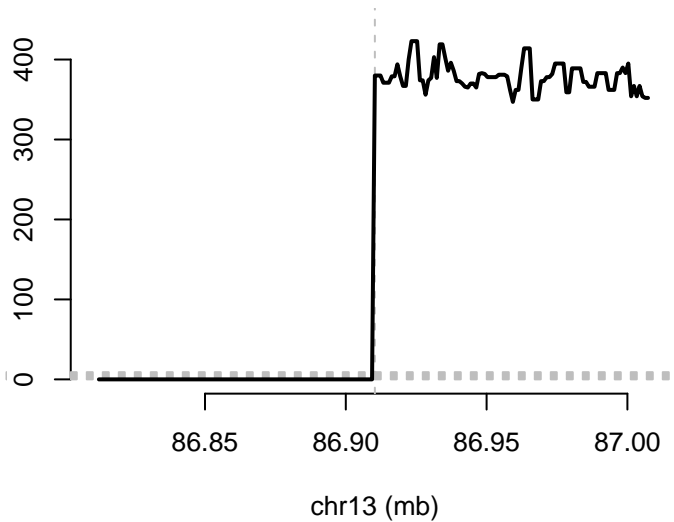

K562 chr13:86,760,324::chr13:86,910,323+-

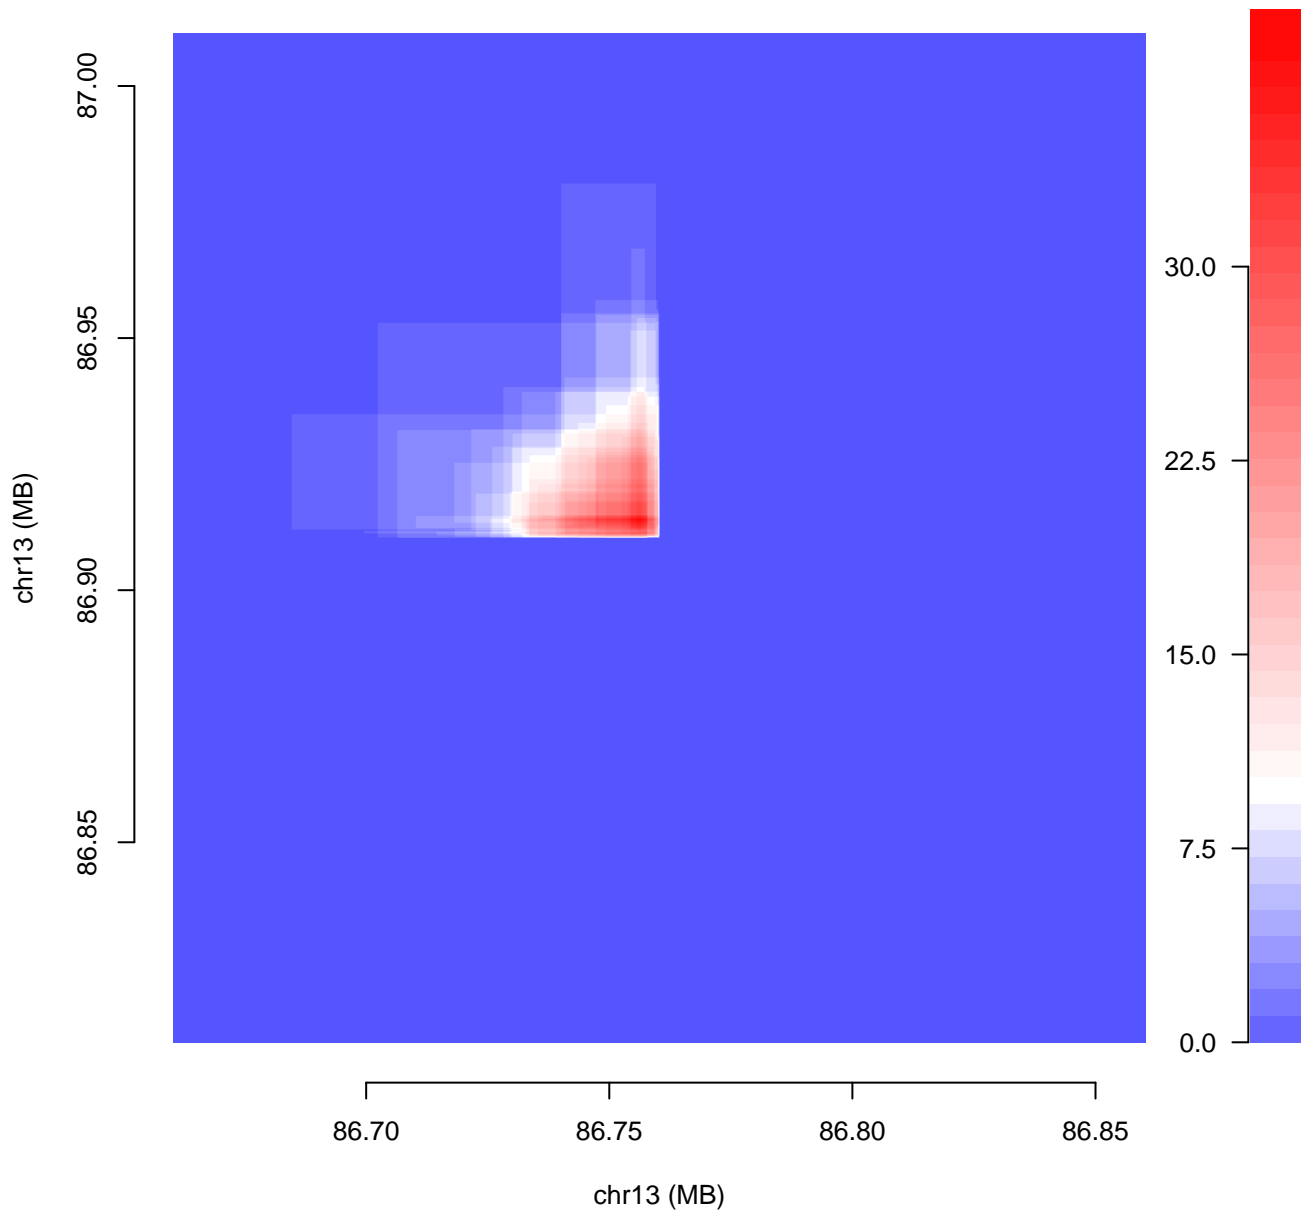

Supplement: Supplemental_Data.zip [file event_228.pdf › event_228.pdf]

Barcode

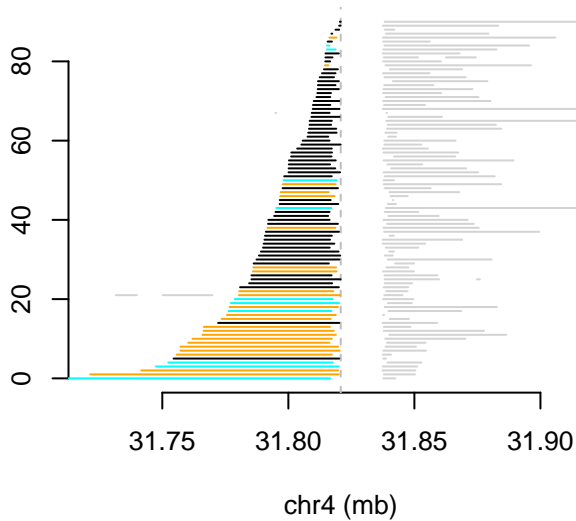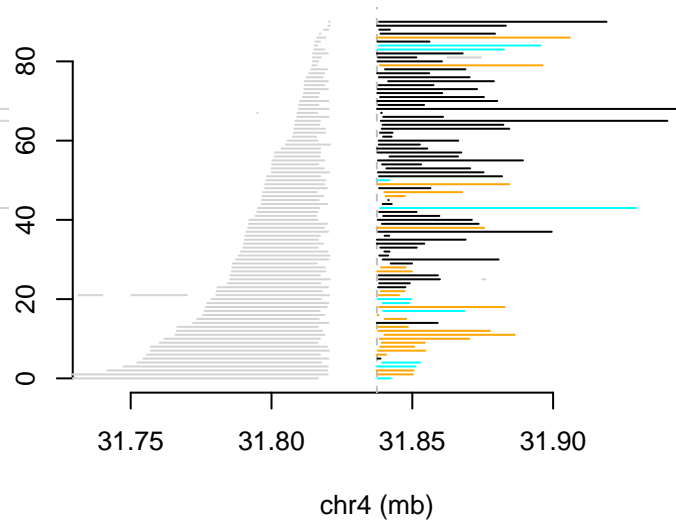

Copy number

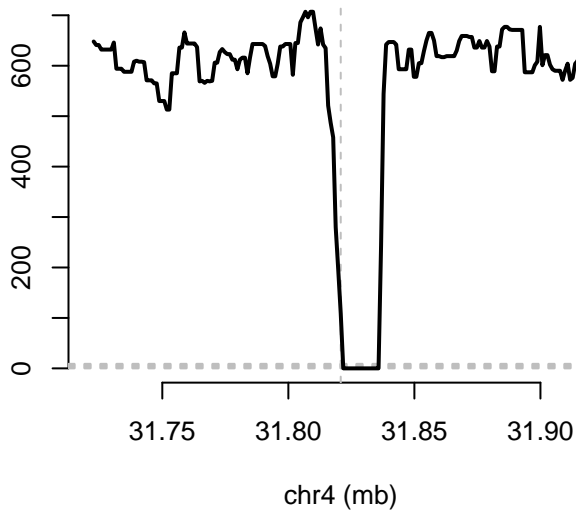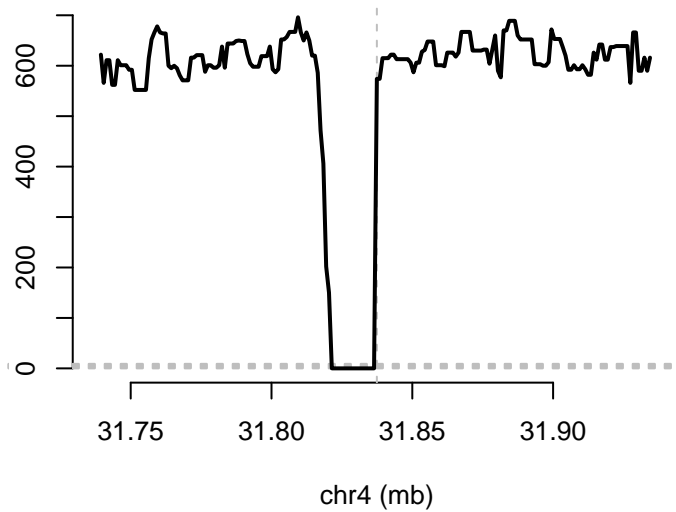

K562 chr4:31,837,415::chr4:31,820,782-+

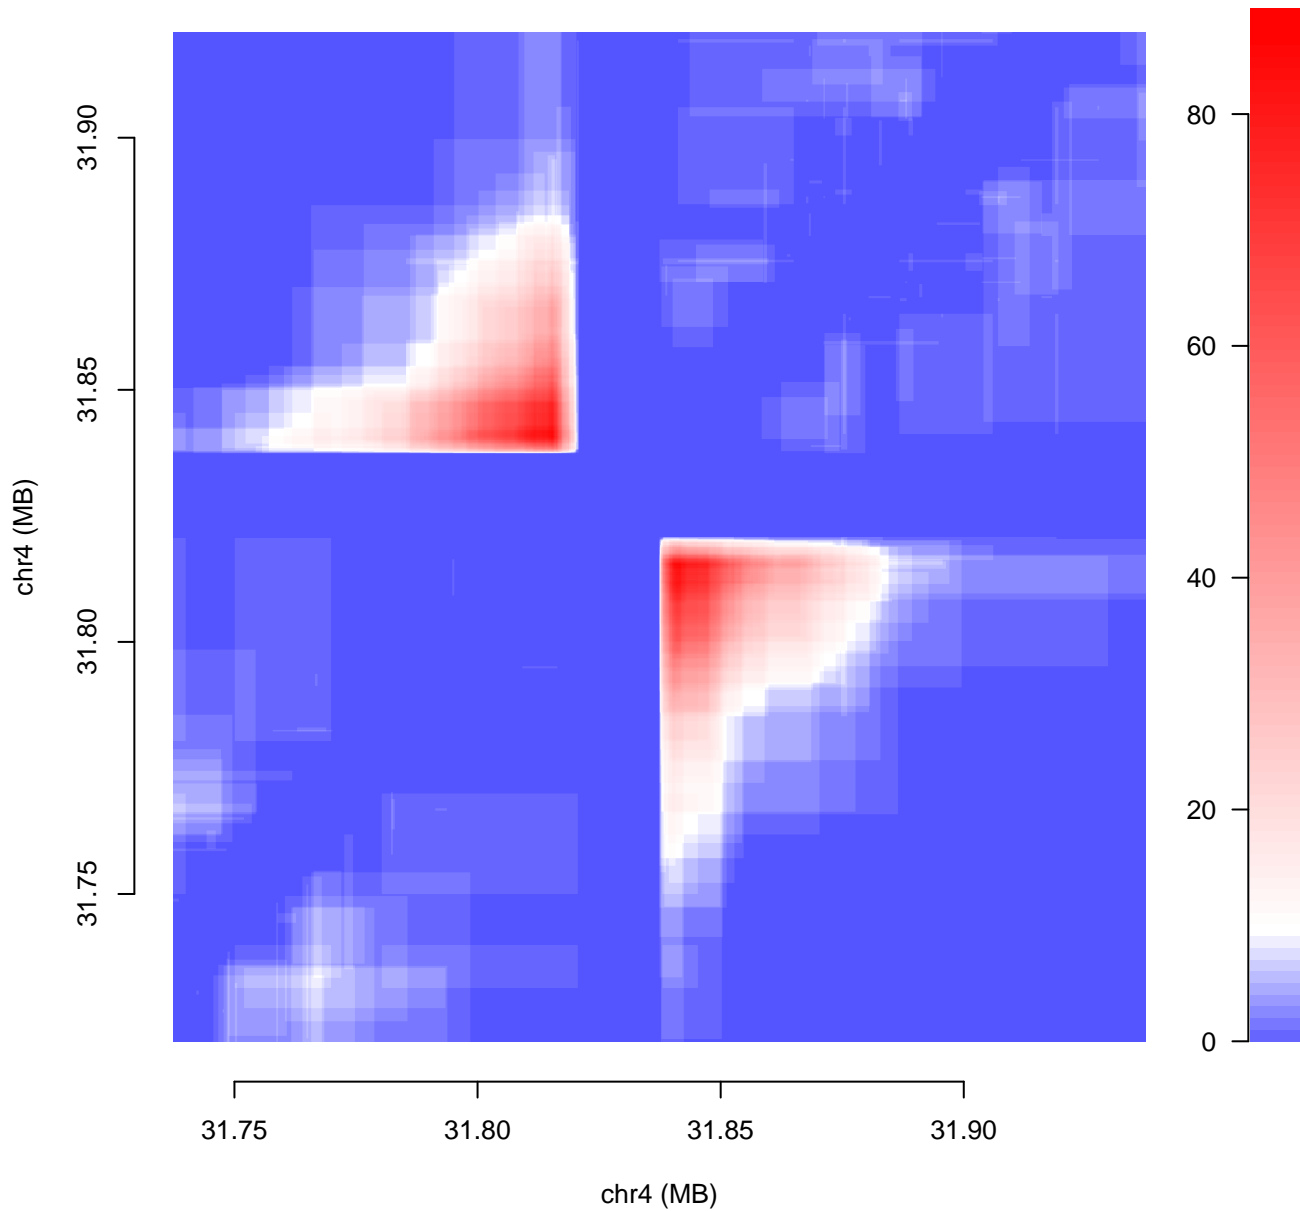

Supplement: Supplemental_Data.zip [file event_229.pdf › event_229.pdf]

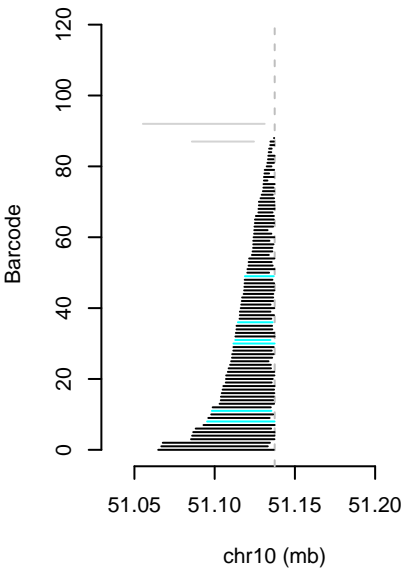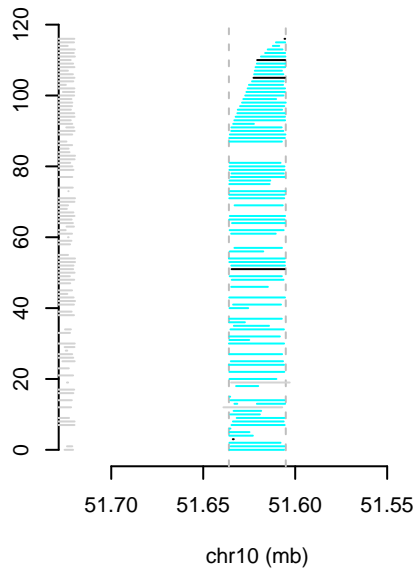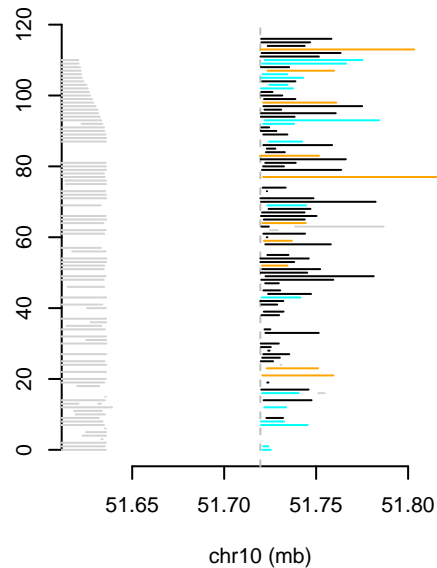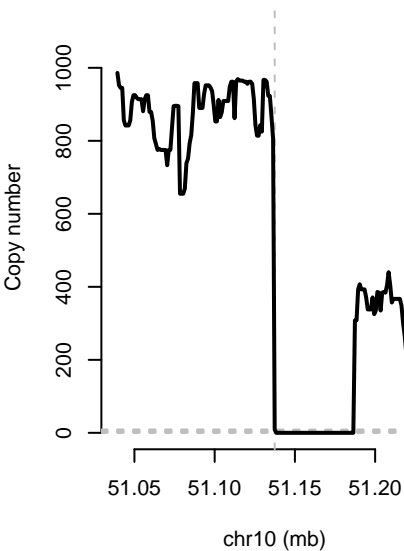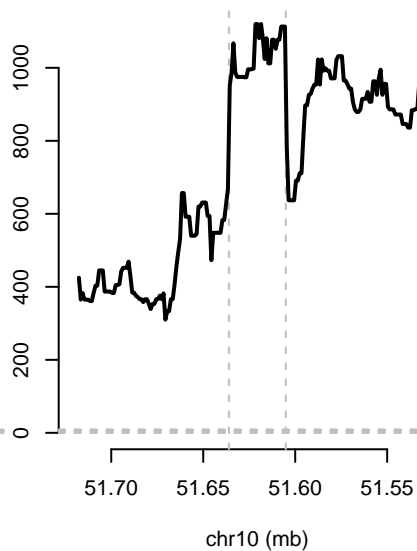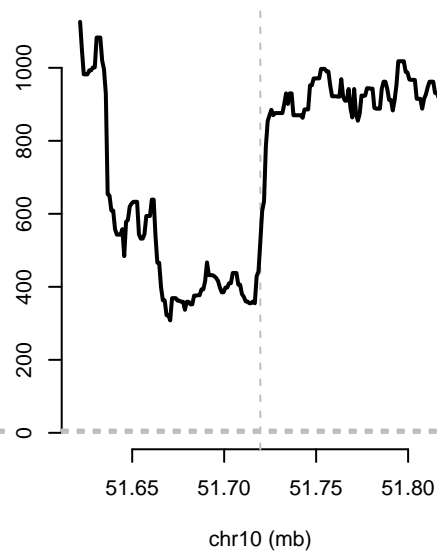

K562 chr10:51,605,118::chr10:51,719,668--

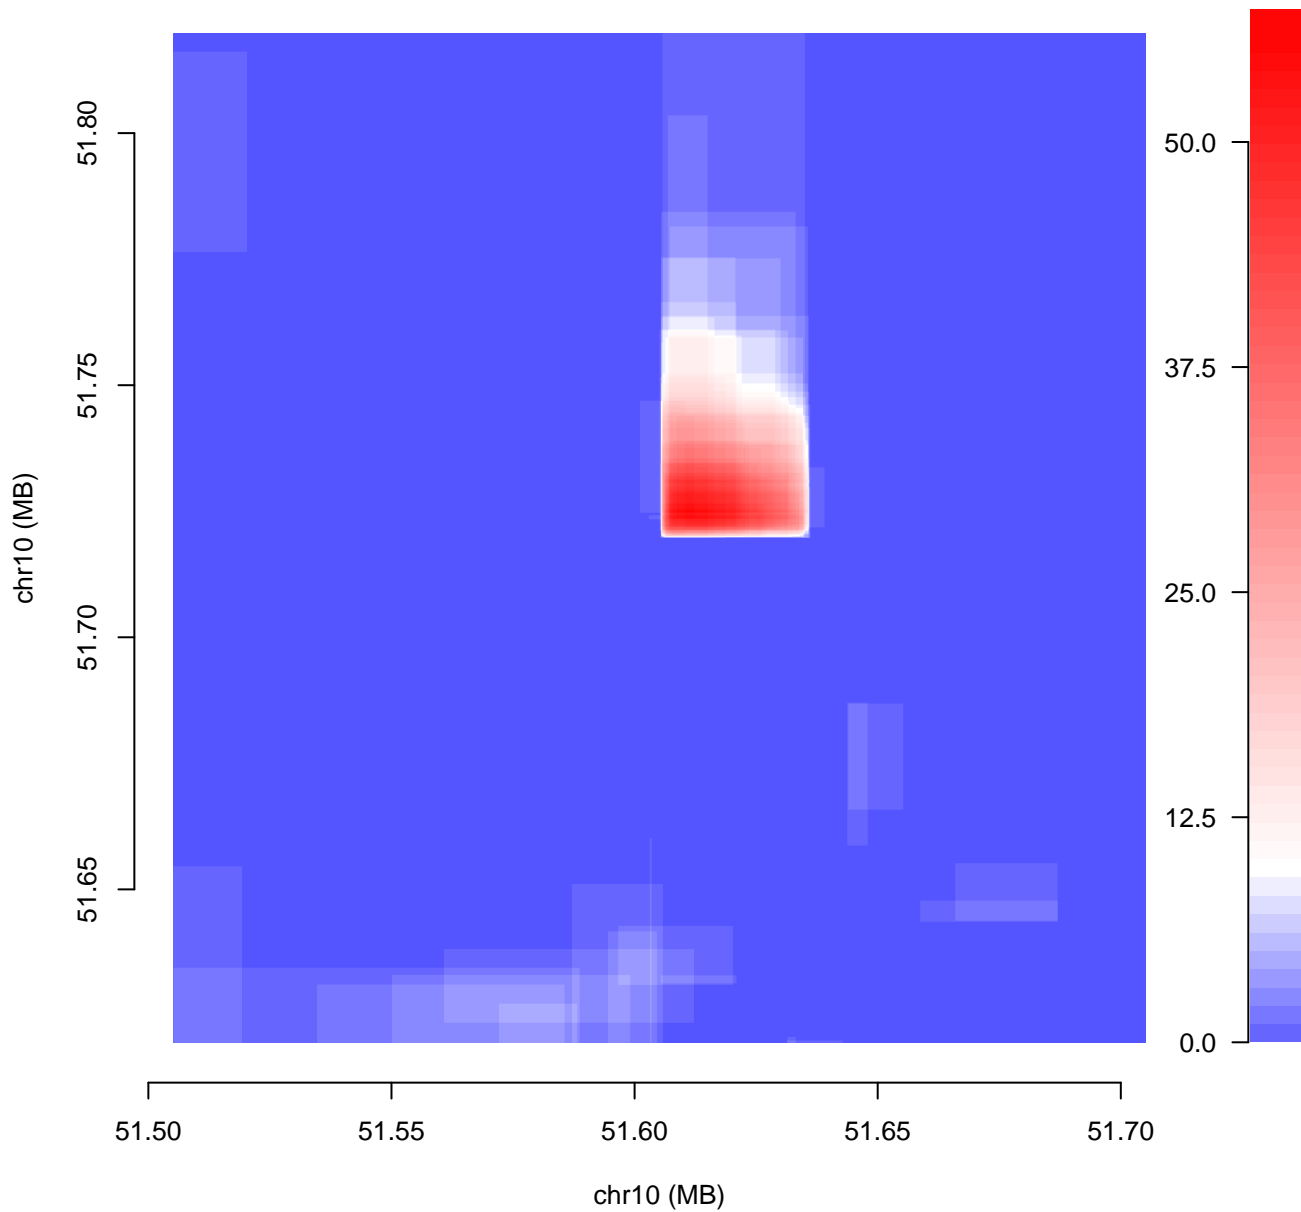

K562 chr10:51,605,118::chr10:51,636,043—+

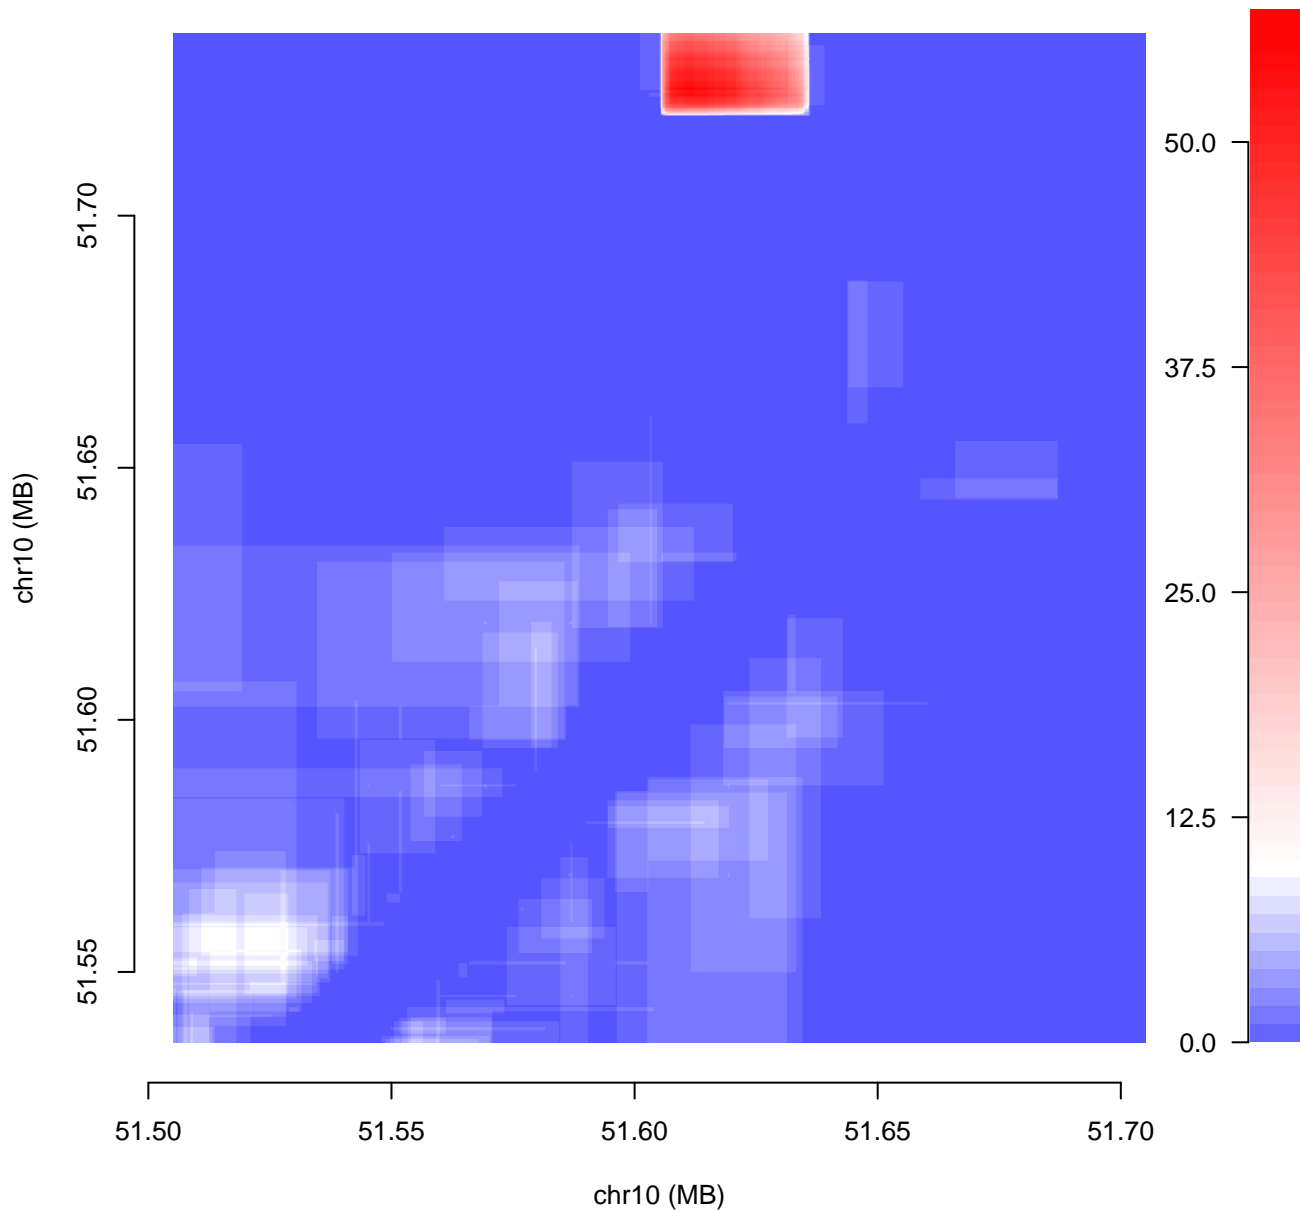

K562 chr10:51,137,398::chr10:51,636,043++

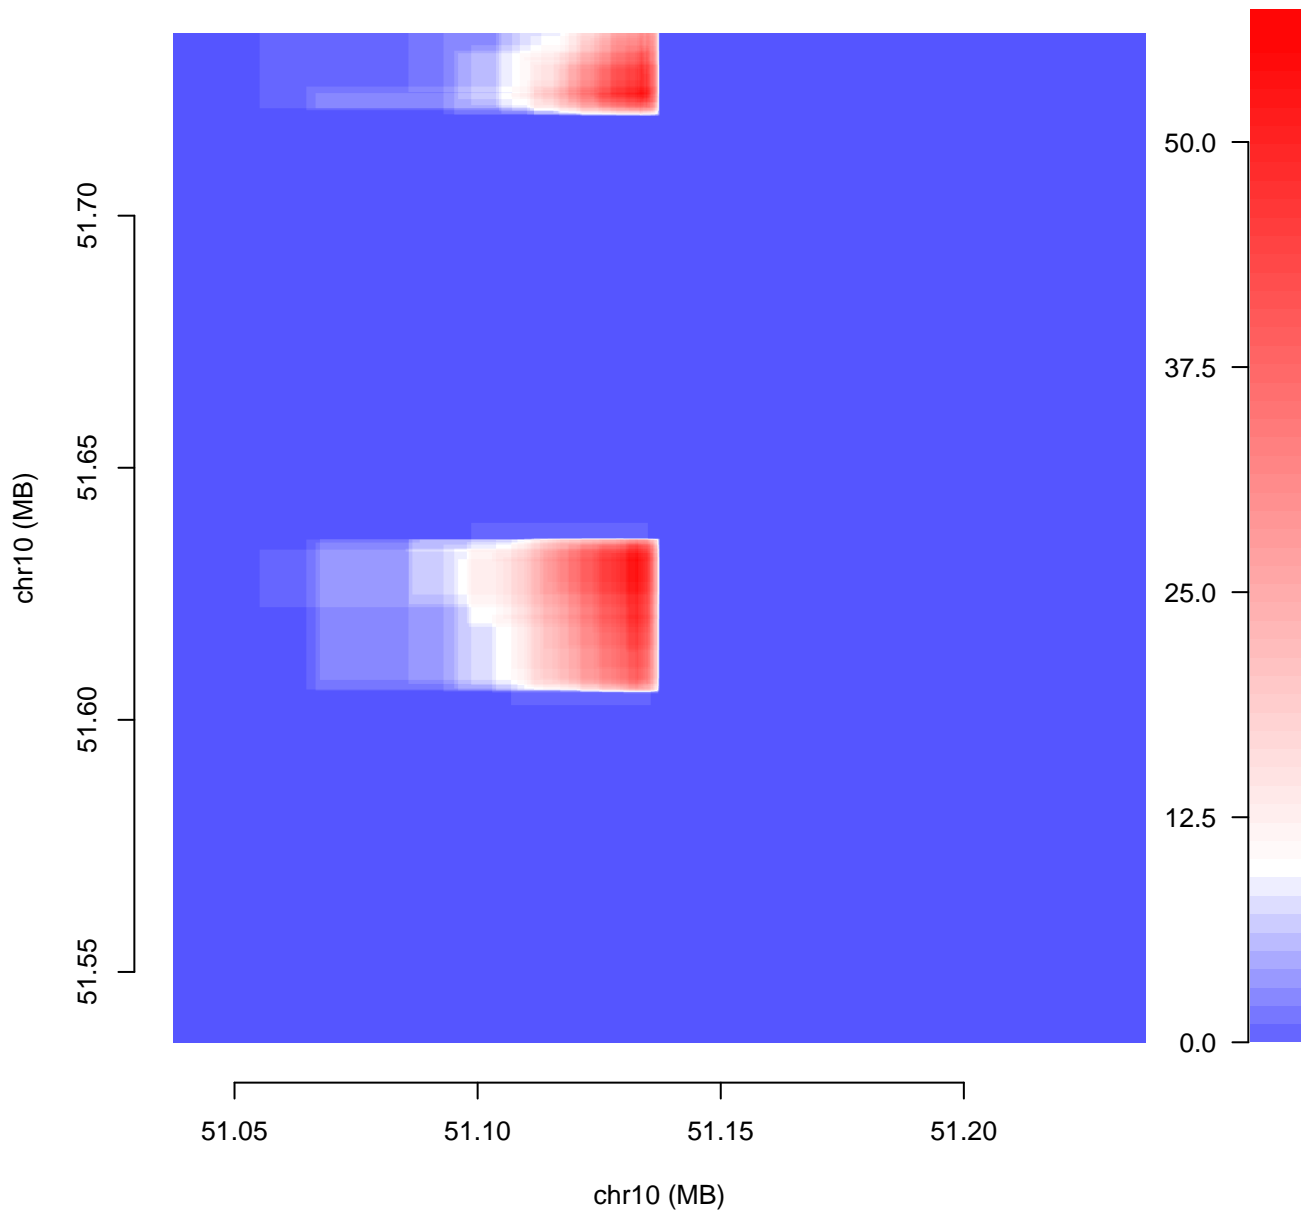

Supplement: Supplemental_Data.zip [file event_23.pdf › event_23.pdf]

Barcode

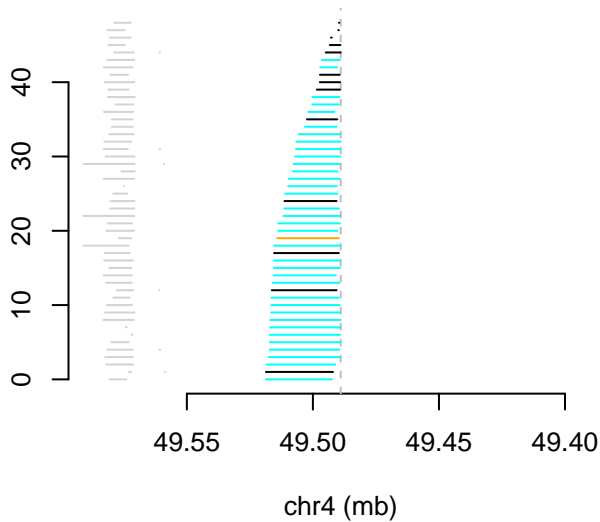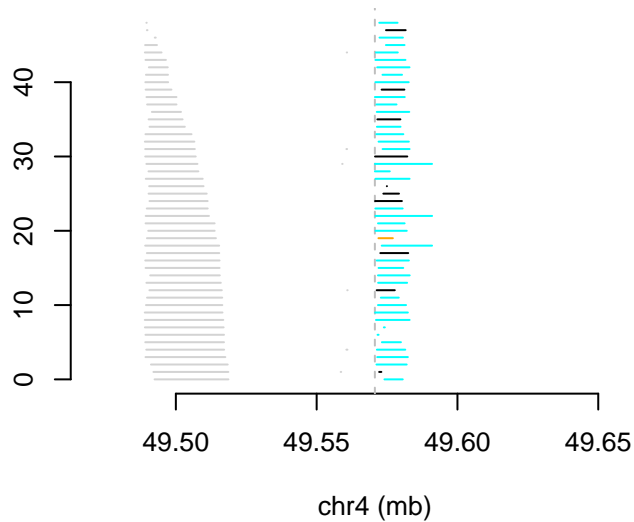

Copy number

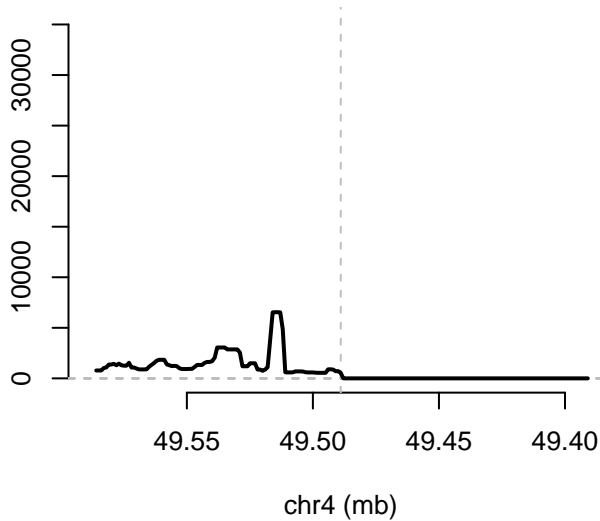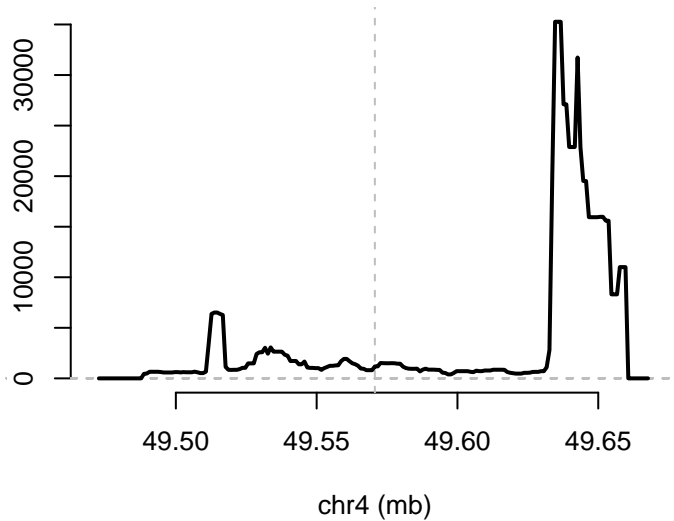

K562 chr4:49,488,957::chr4:49,570,672--

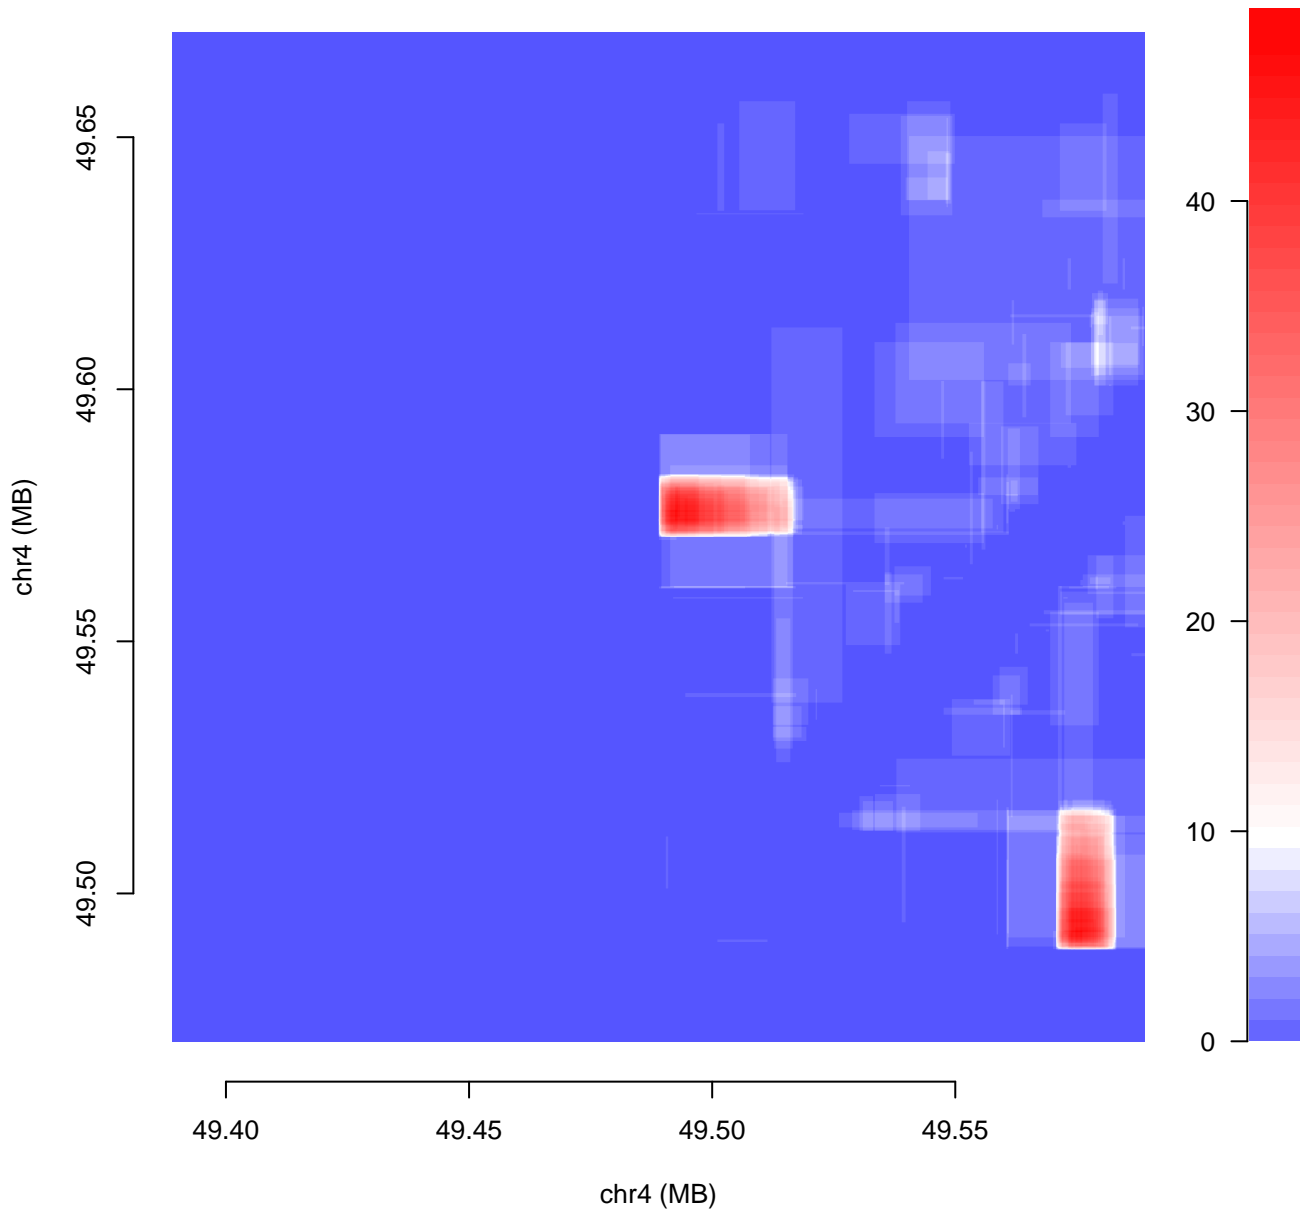

Supplement: Supplemental_Data.zip [file event_230.pdf › event_230.pdf]

Barcode

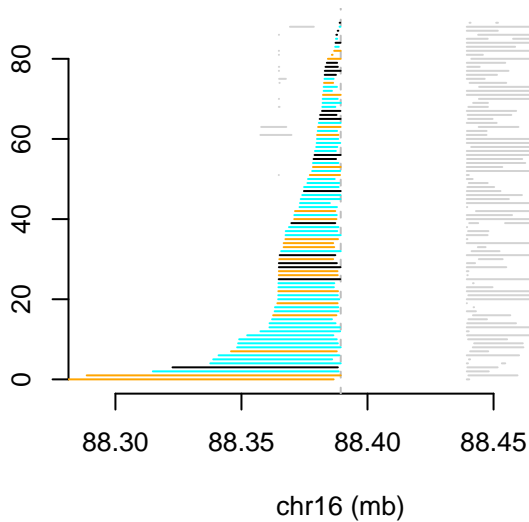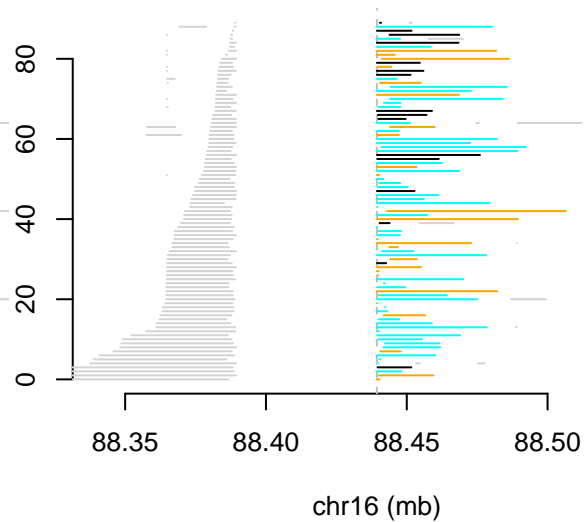

Copy number

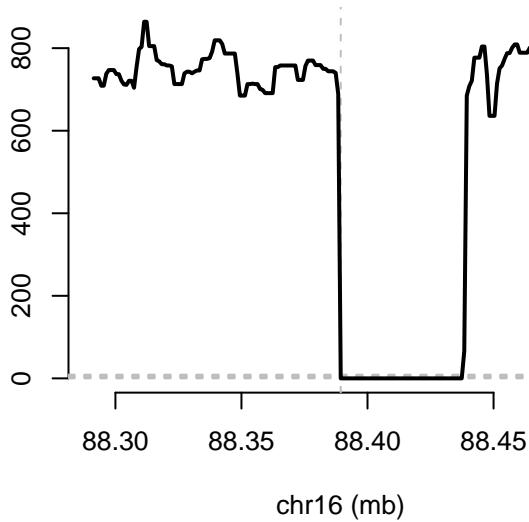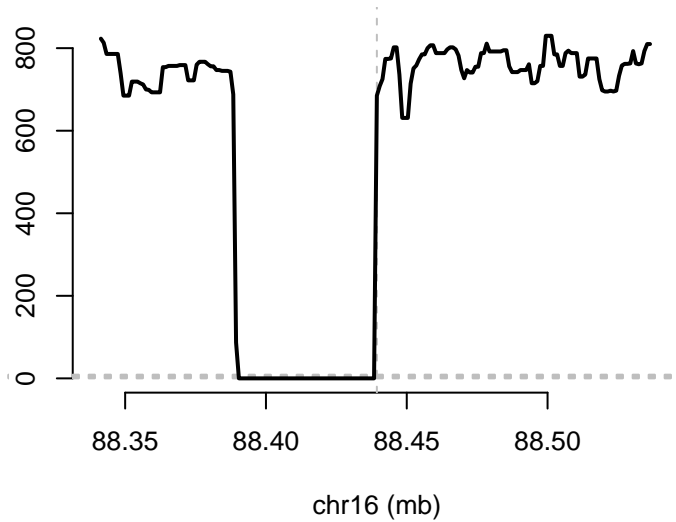

K562 chr16:88,439,382::chr16:88,389,384-+

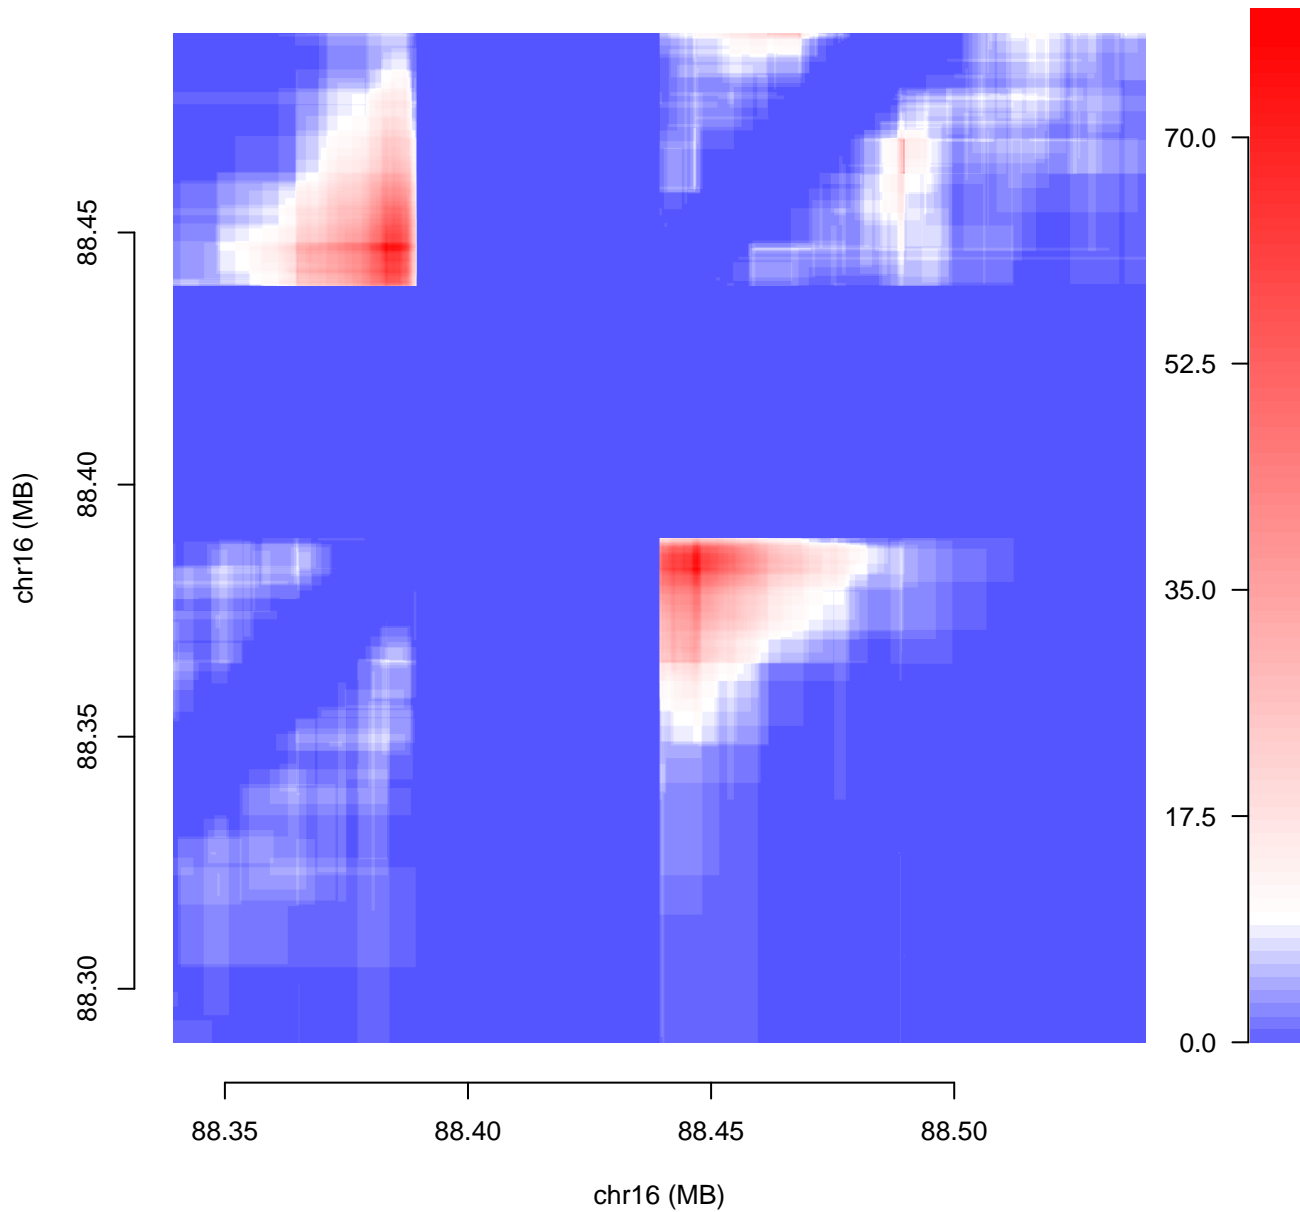

Supplement: Supplemental_Data.zip [file event_231.pdf › event_231.pdf]

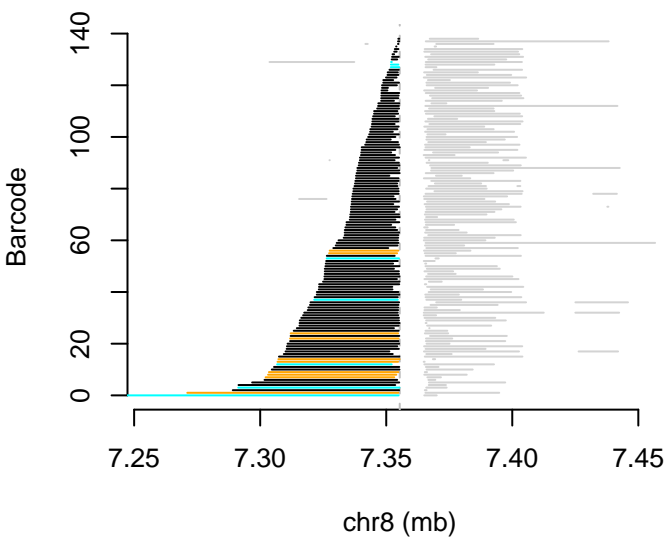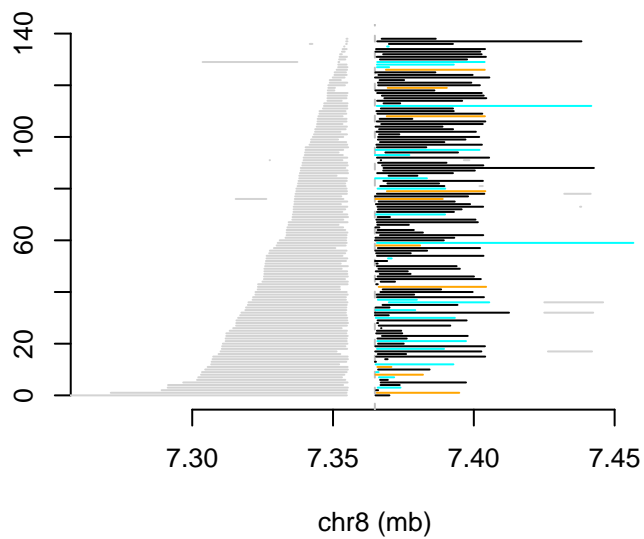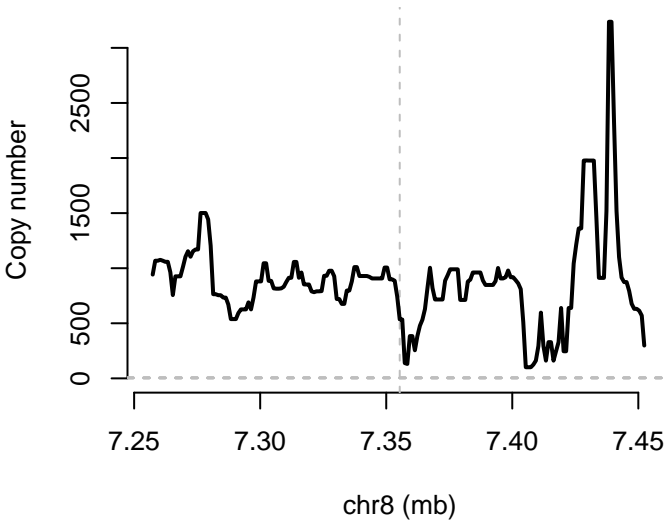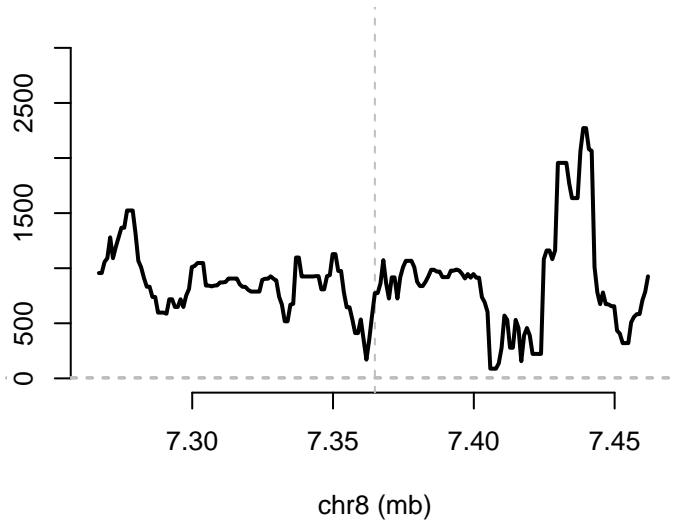

K562 chr8:7,364,857::chr8:7,355,362--+

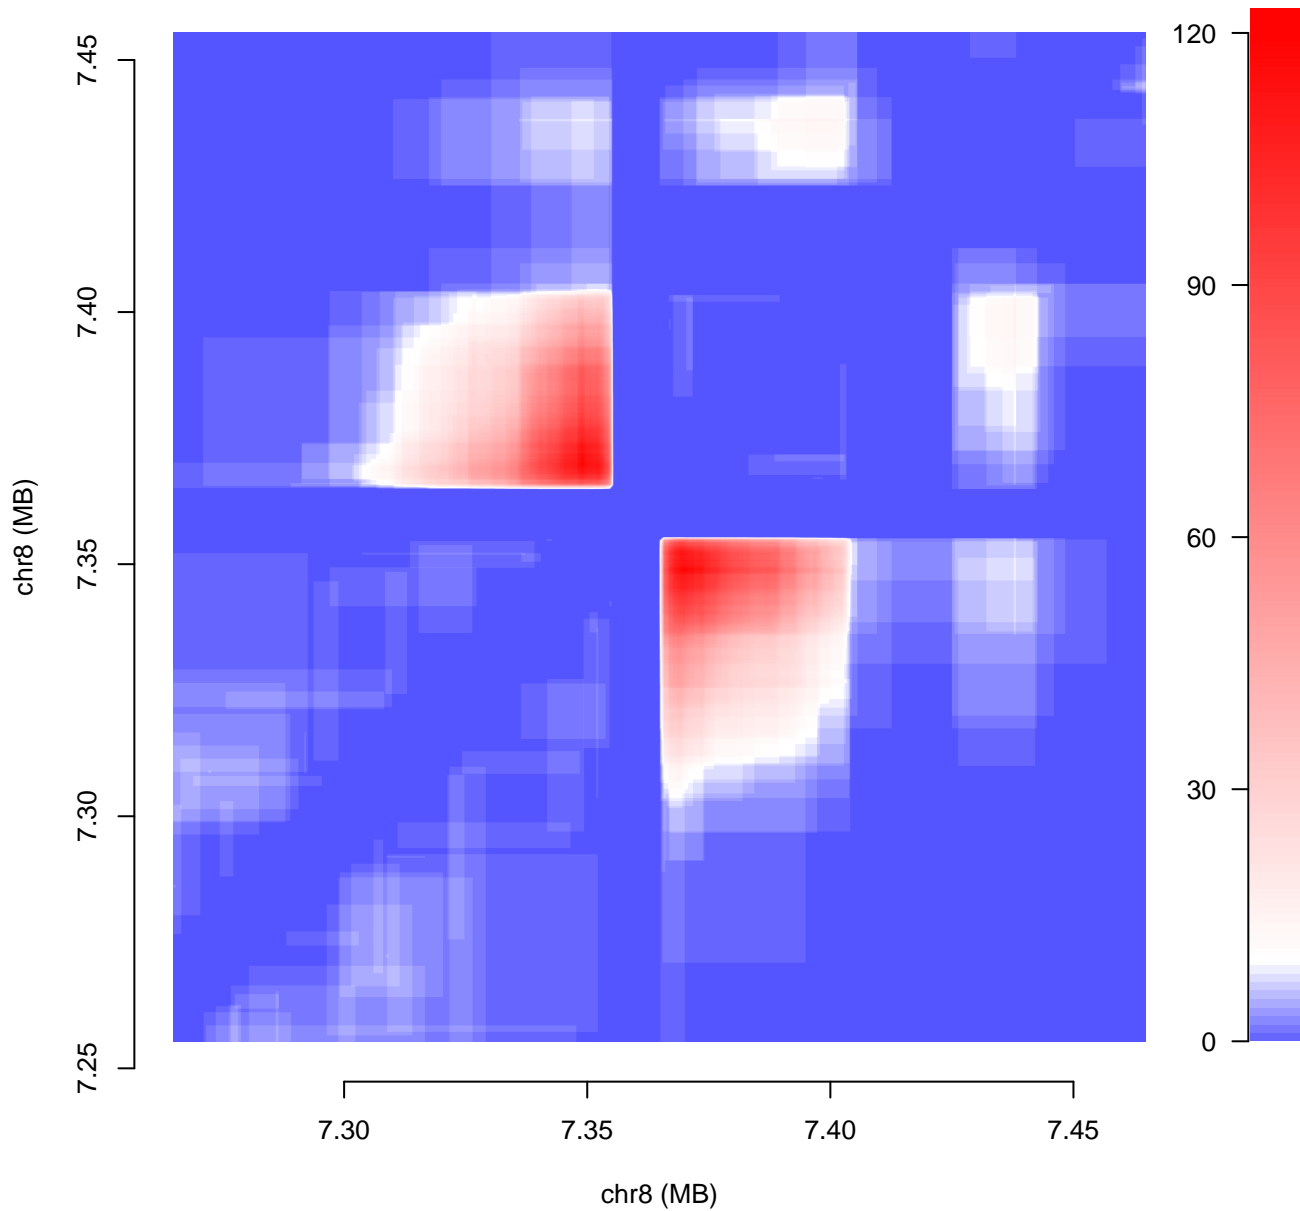

Supplement: Supplemental_Data.zip [file event_232.pdf › event_232.pdf]

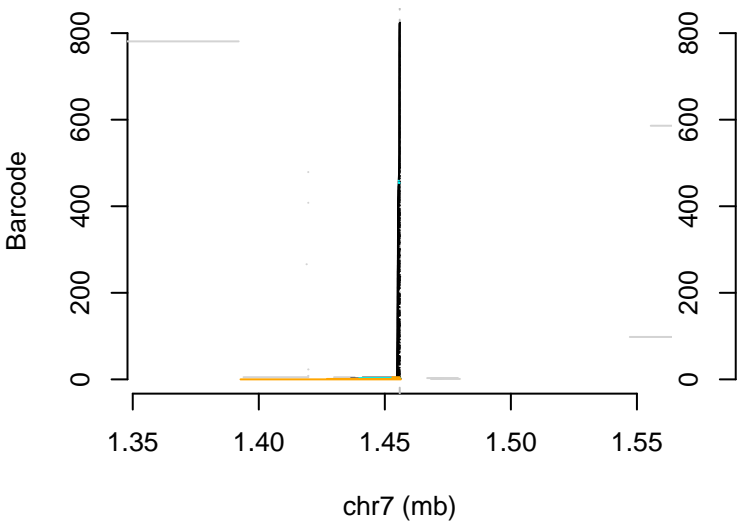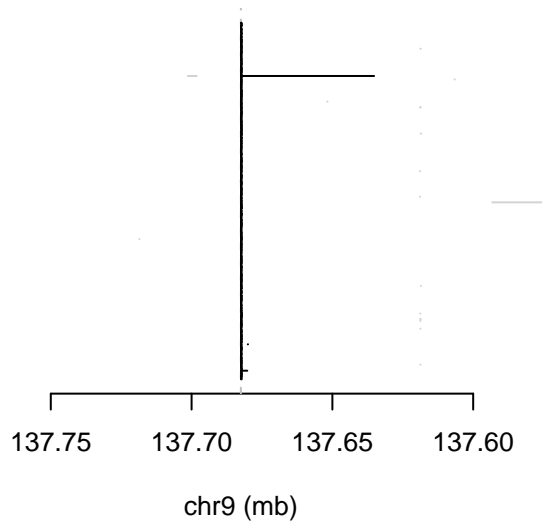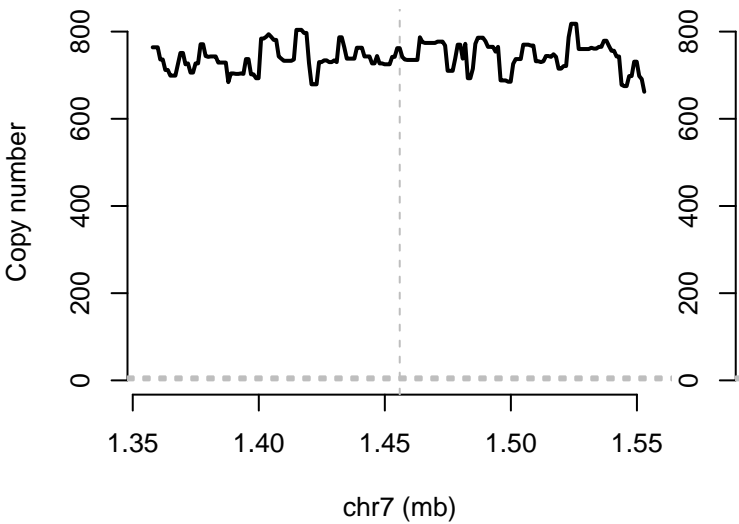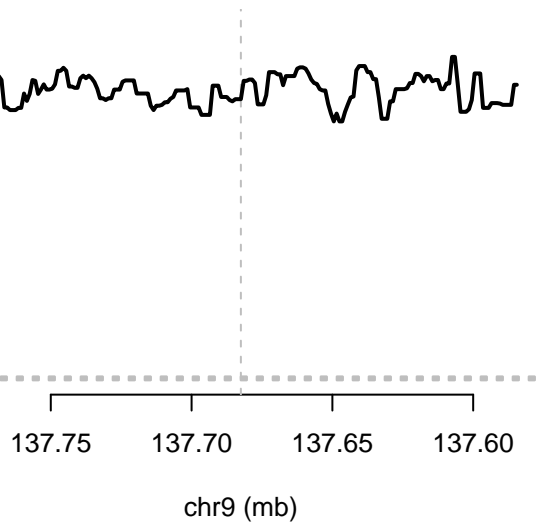

K562 chr9:137,682,497::chr7:1,455,914++

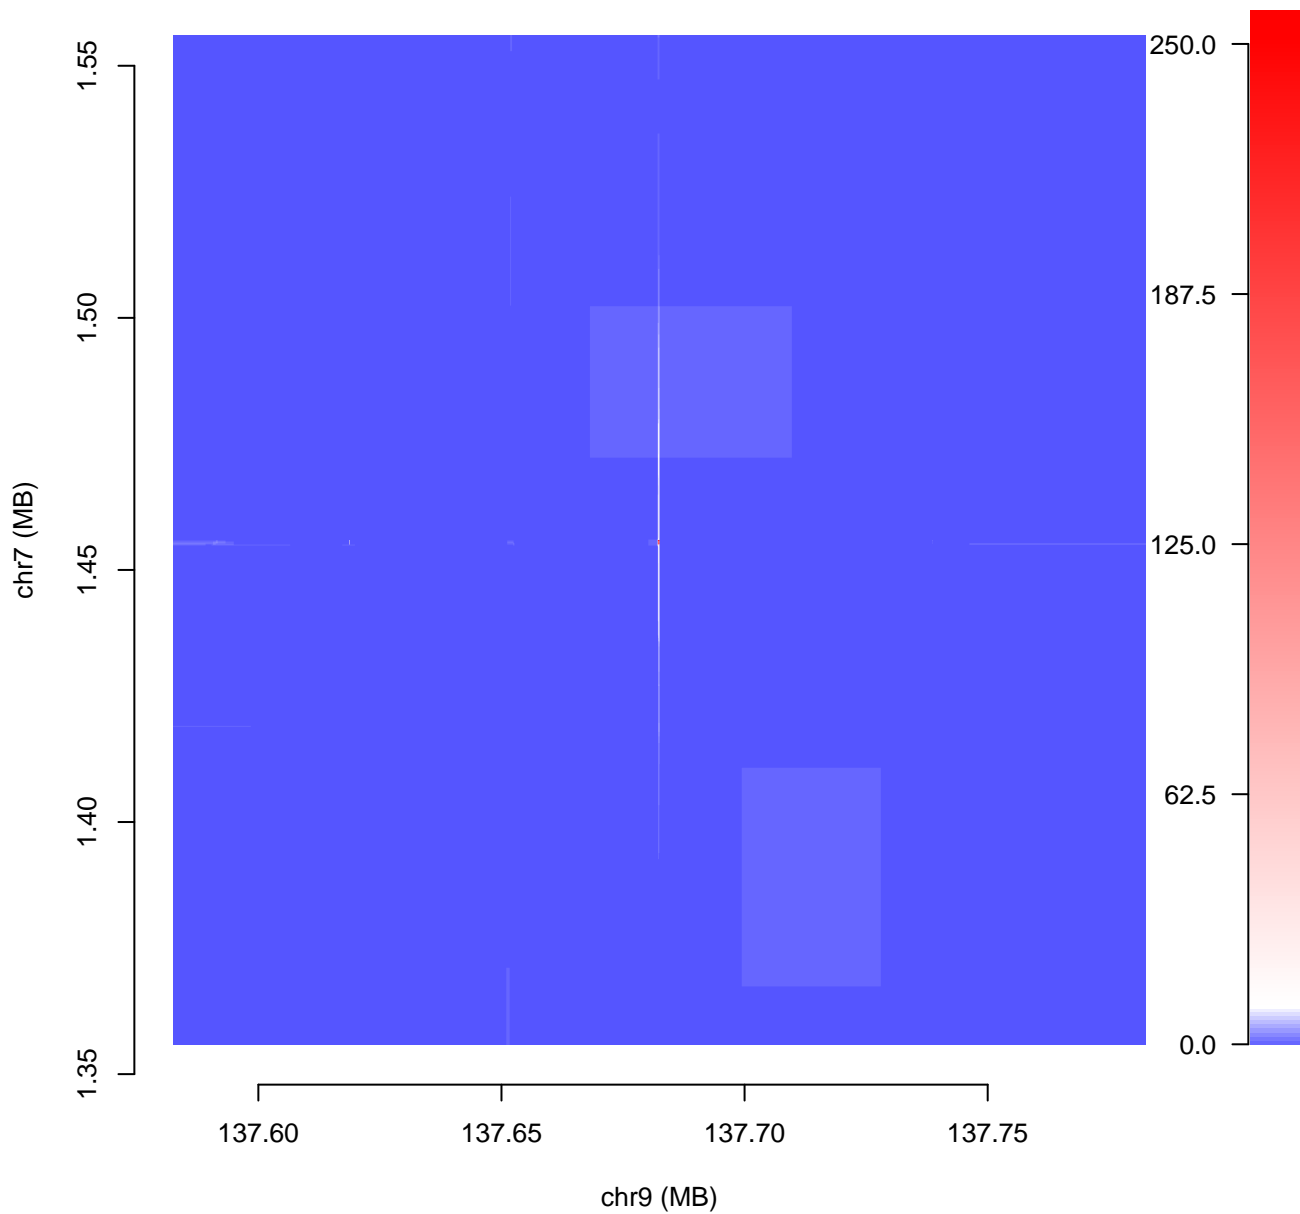

Supplement: Supplemental_Data.zip [file event_233.pdf › event_233.pdf]

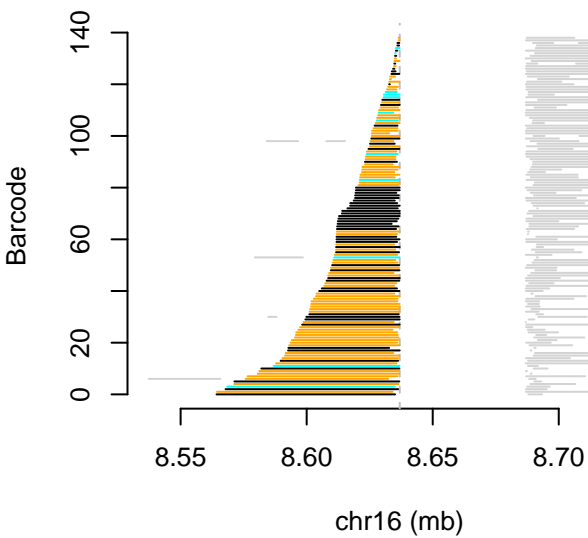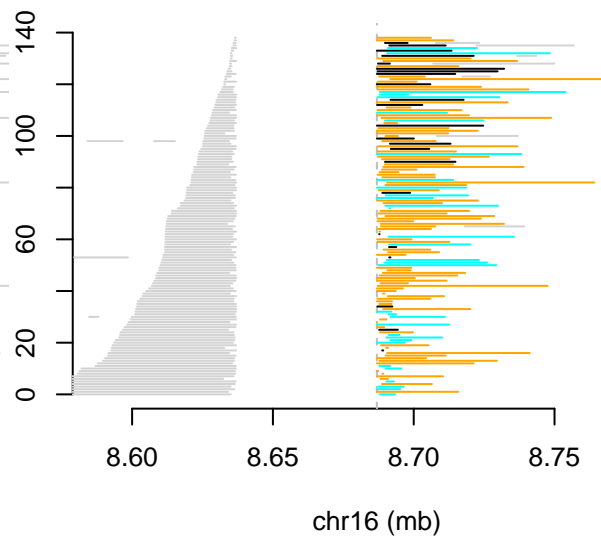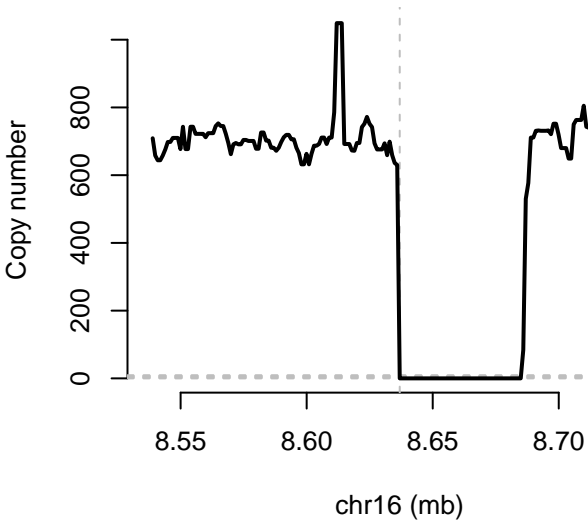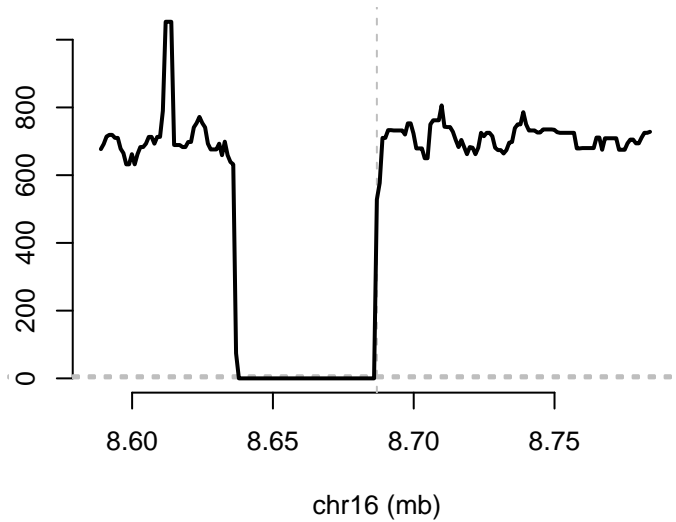

K562 chr16:8,636,922::chr16:8,686,919+-

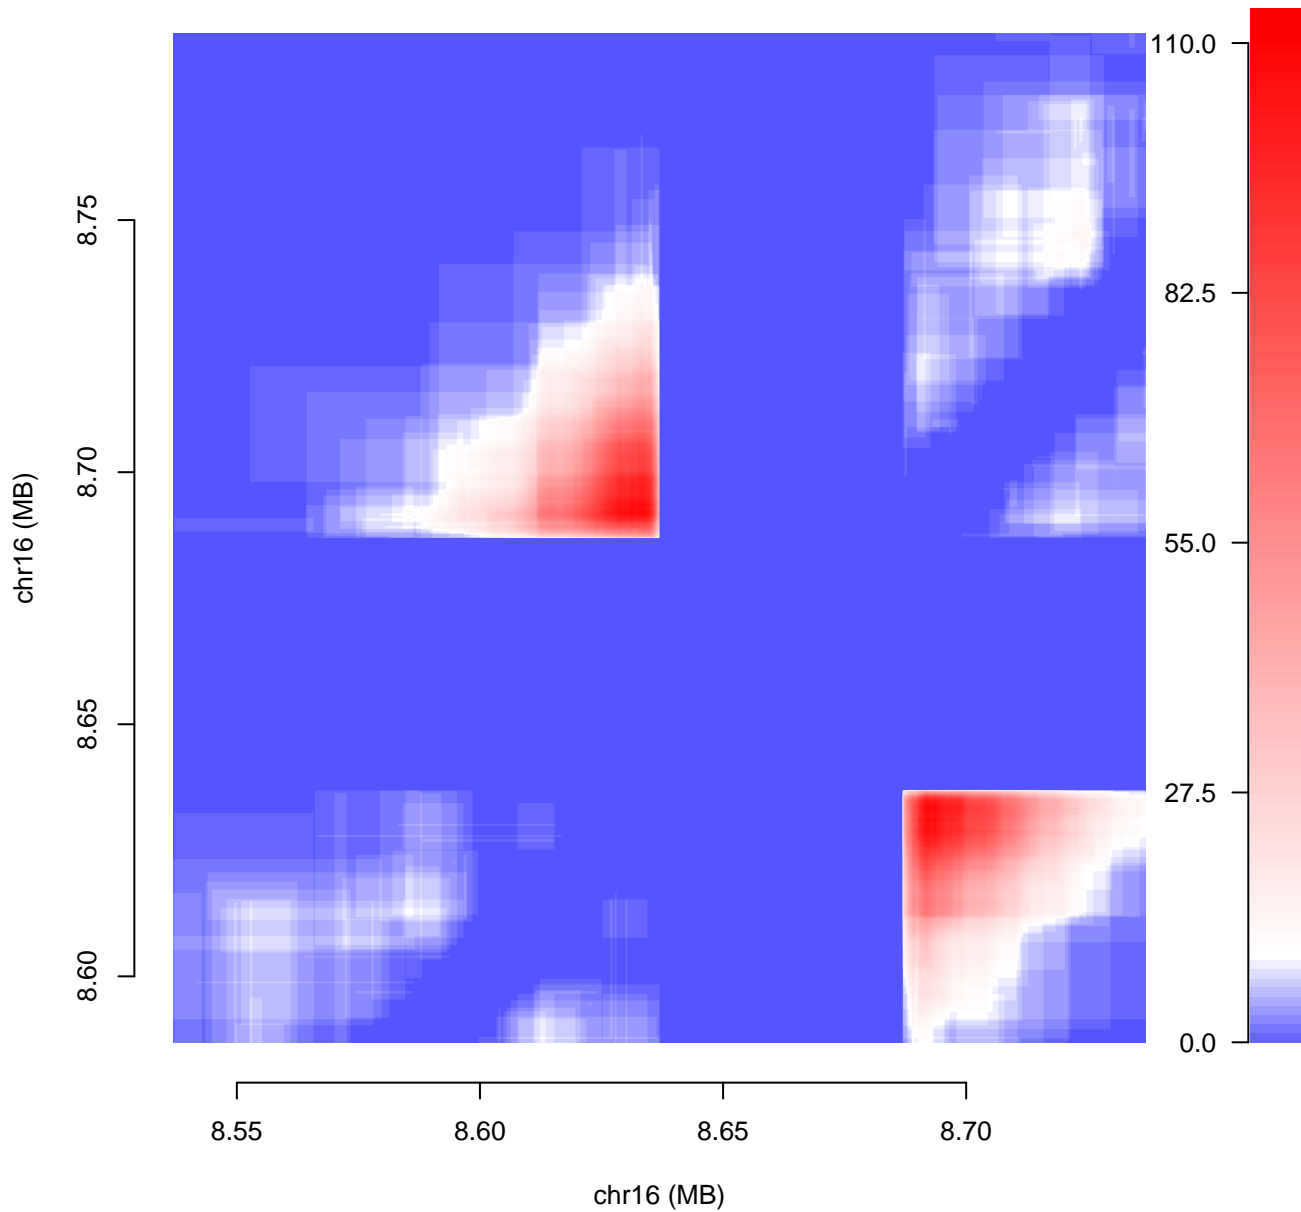

Supplement: Supplemental_Data.zip [file event_234.pdf › event_234.pdf]

Barcode

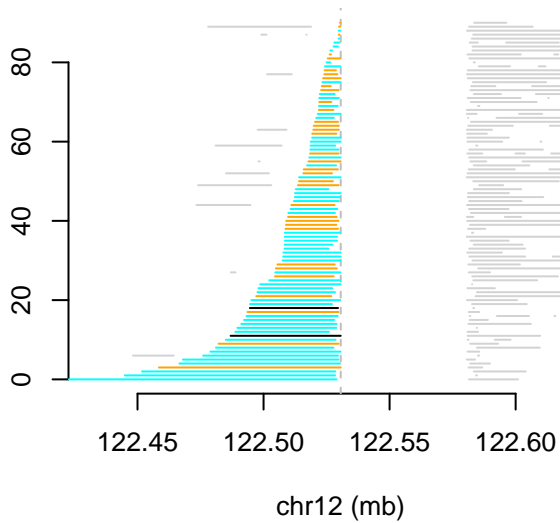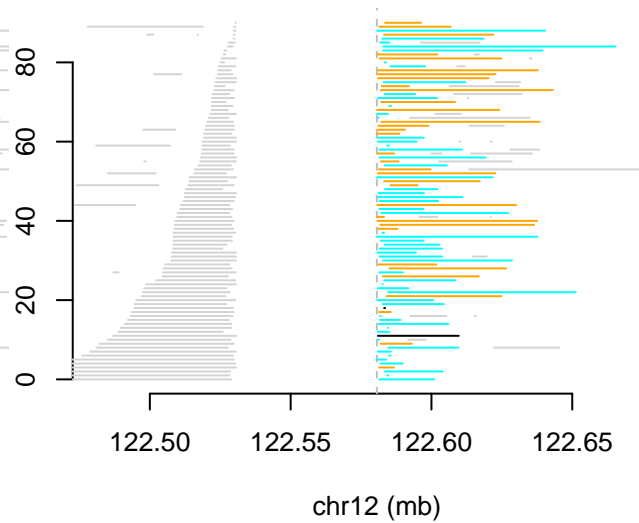

Copy number

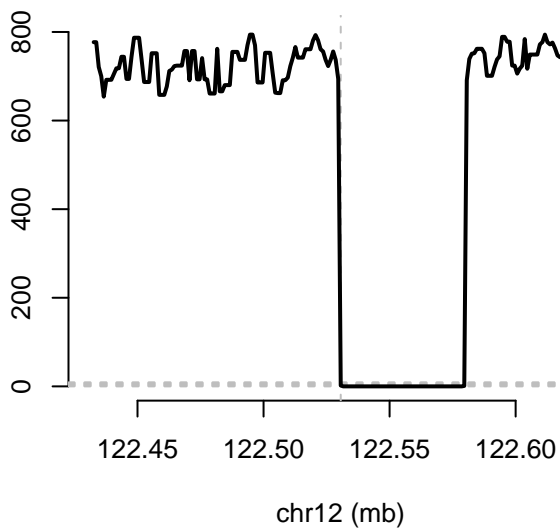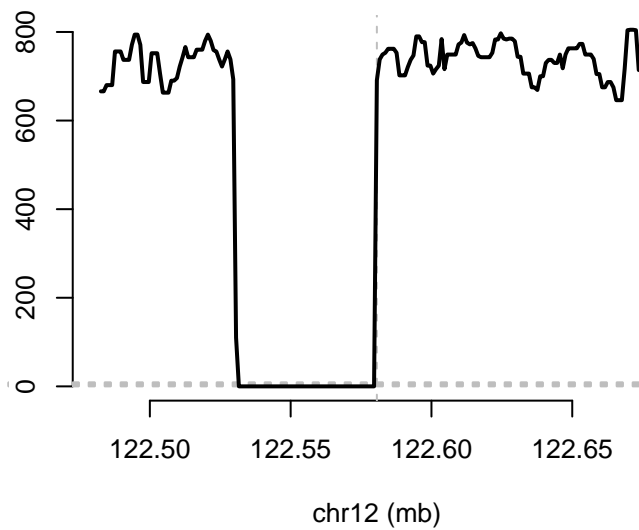

K562 chr12:122,530,623::chr12:122,580,622+-

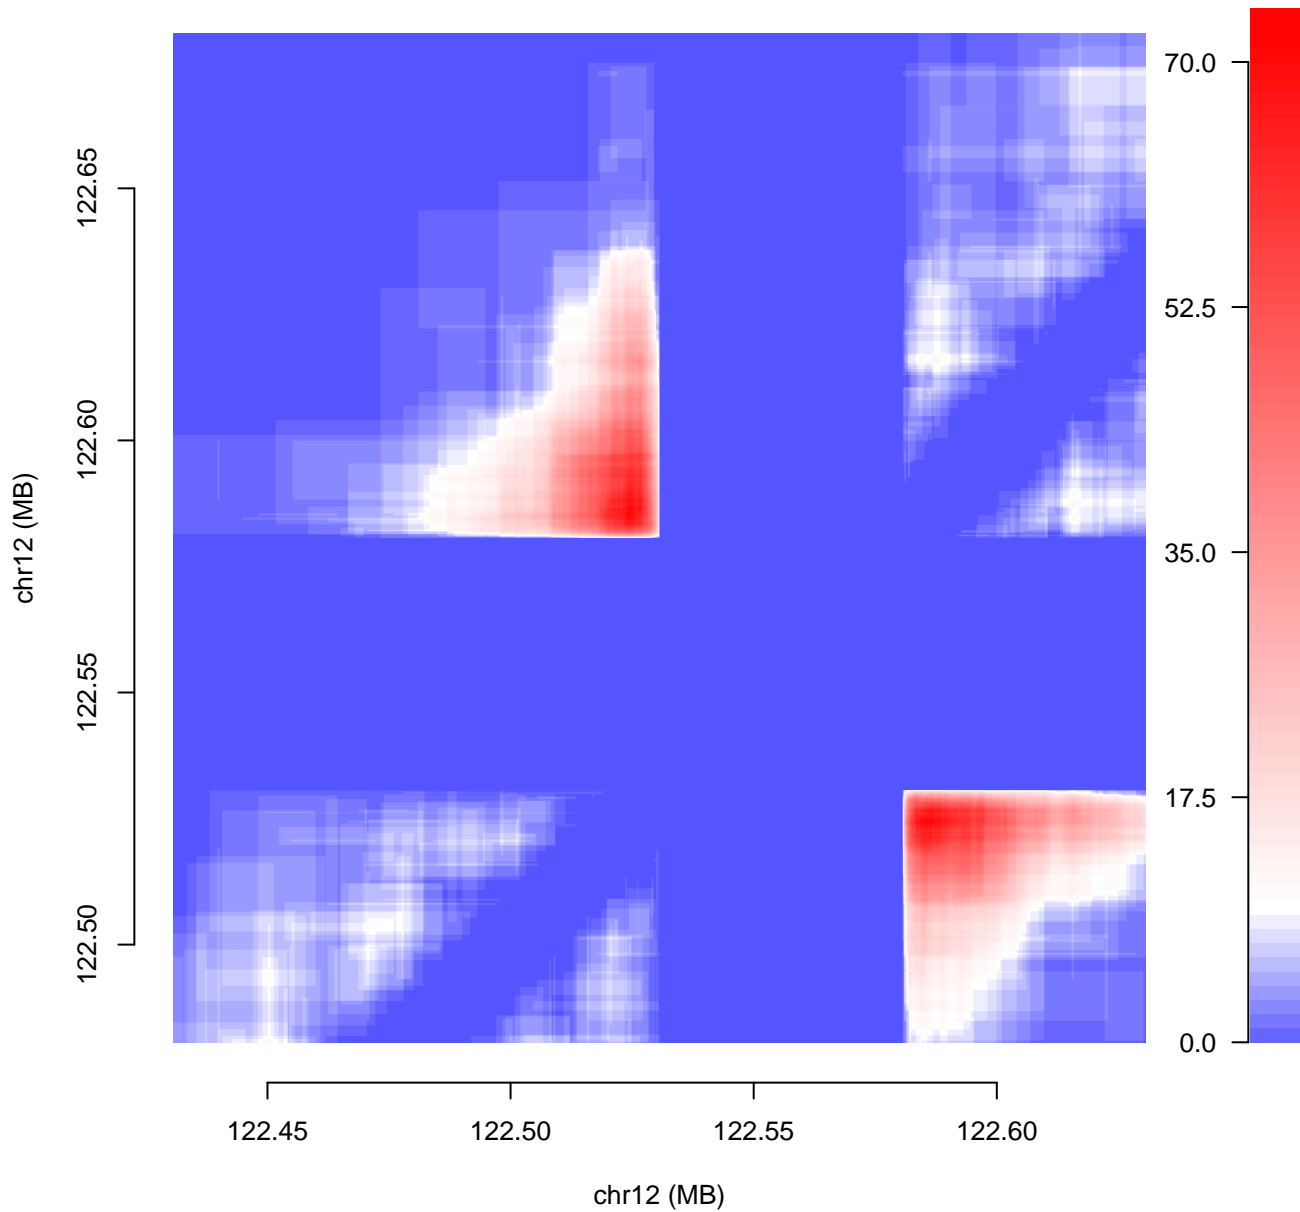

Supplement: Supplemental_Data.zip [file event_235.pdf › event_235.pdf]

Barcode

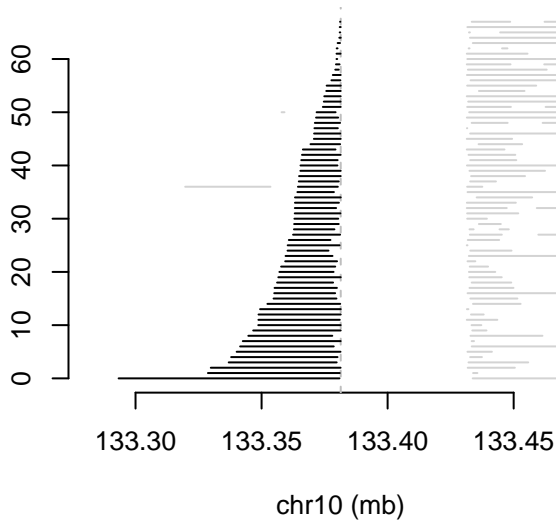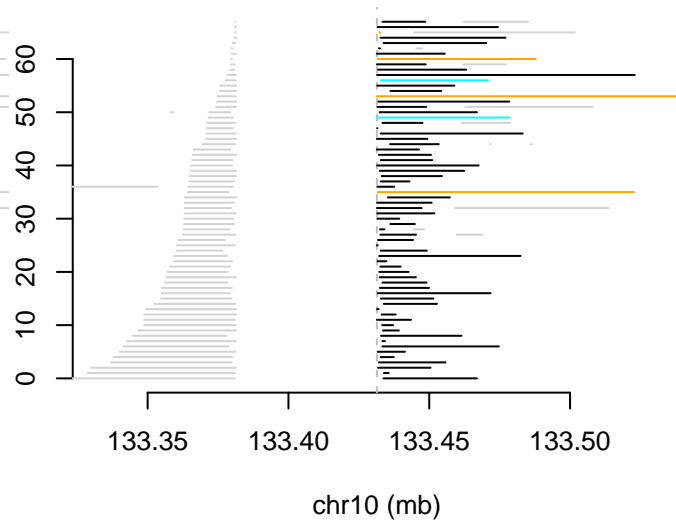

Copy number

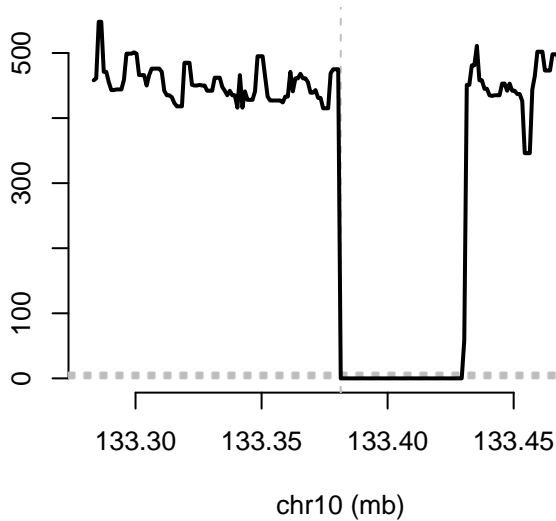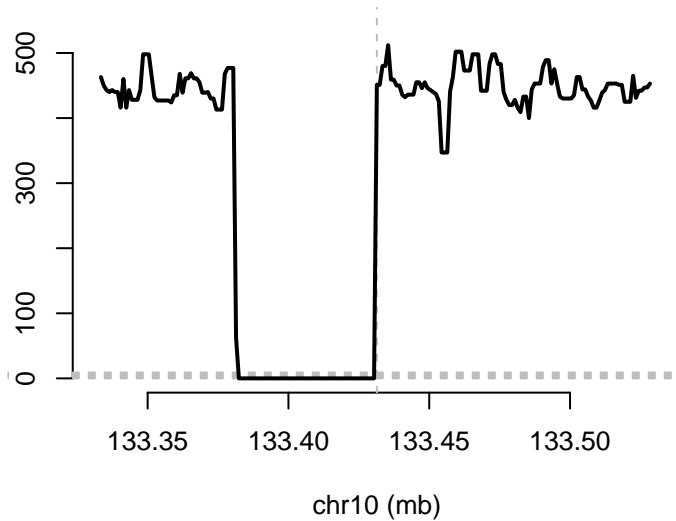

K562 chr10:133,381,404::chr10:133,431,400+-

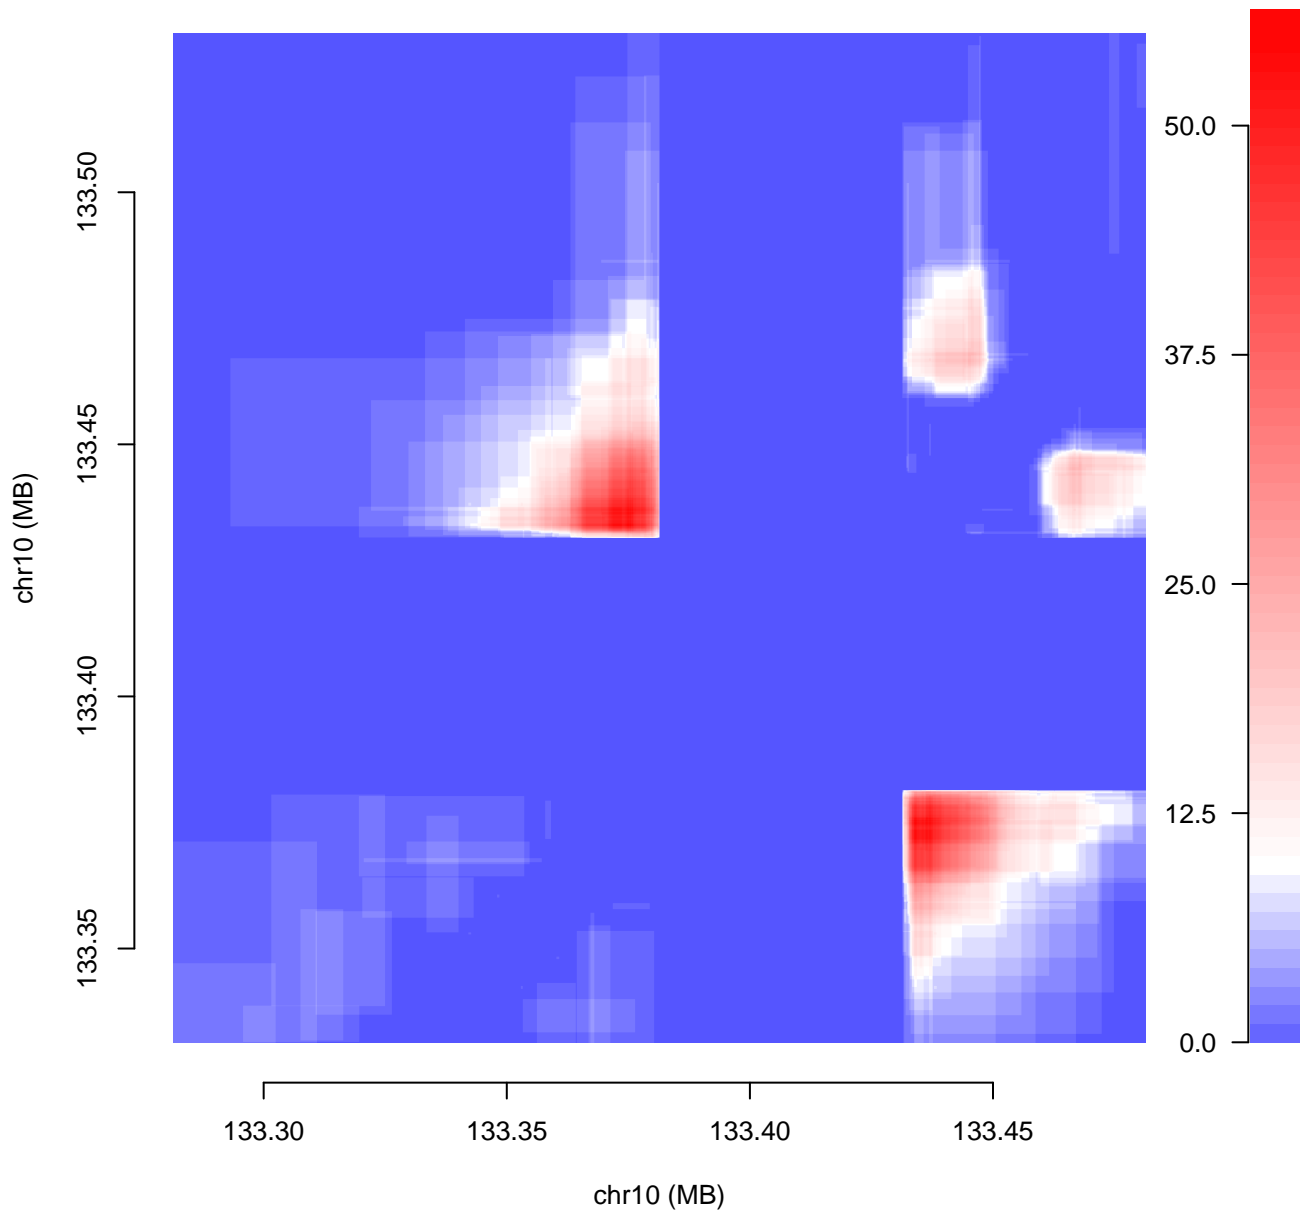

Supplement: Supplemental_Data.zip [file event_236.pdf › event_236.pdf]

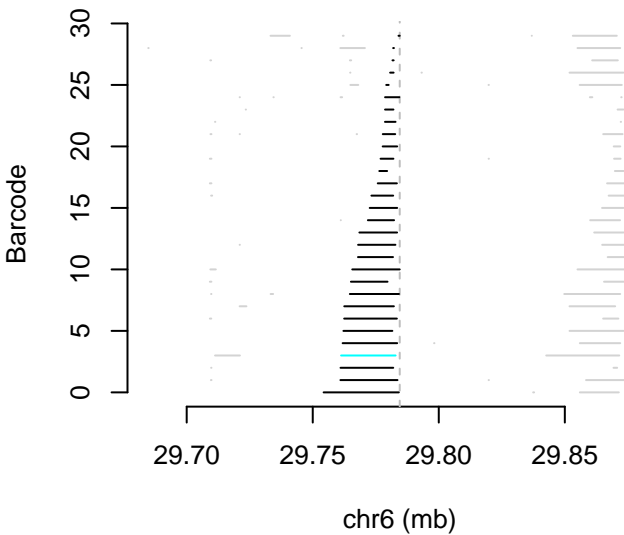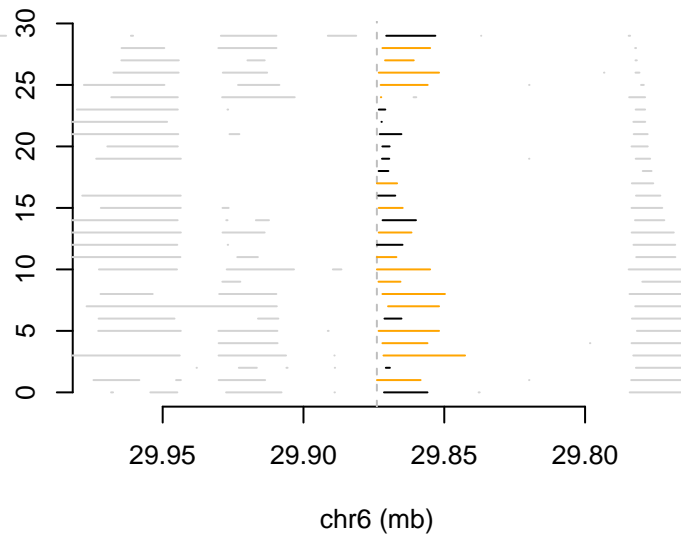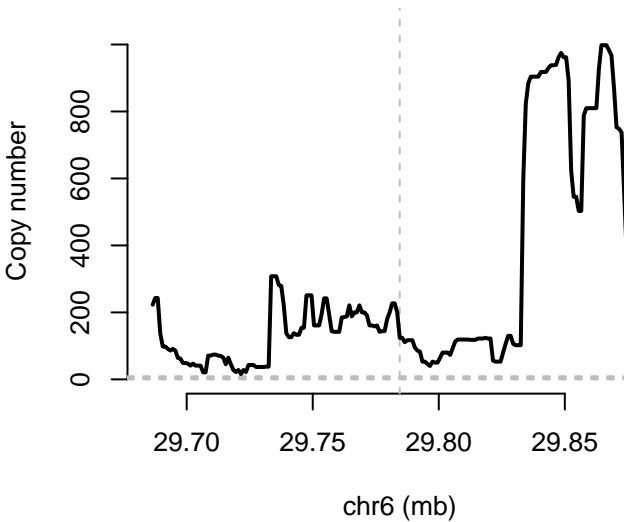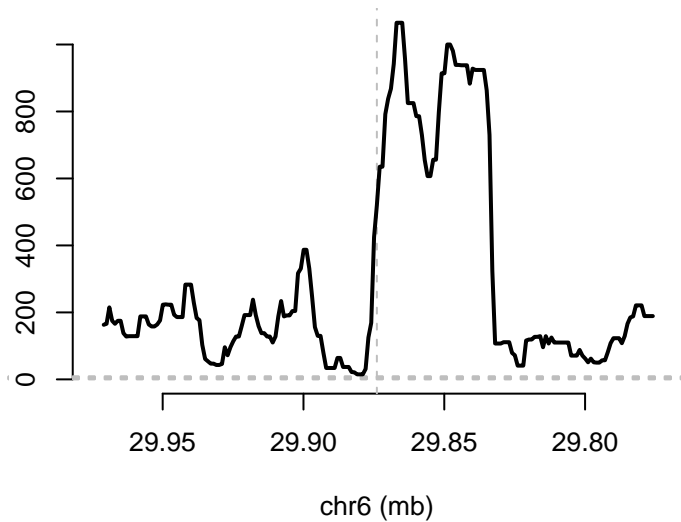

K562 chr6:29,873,938::chr6:29,784,513++

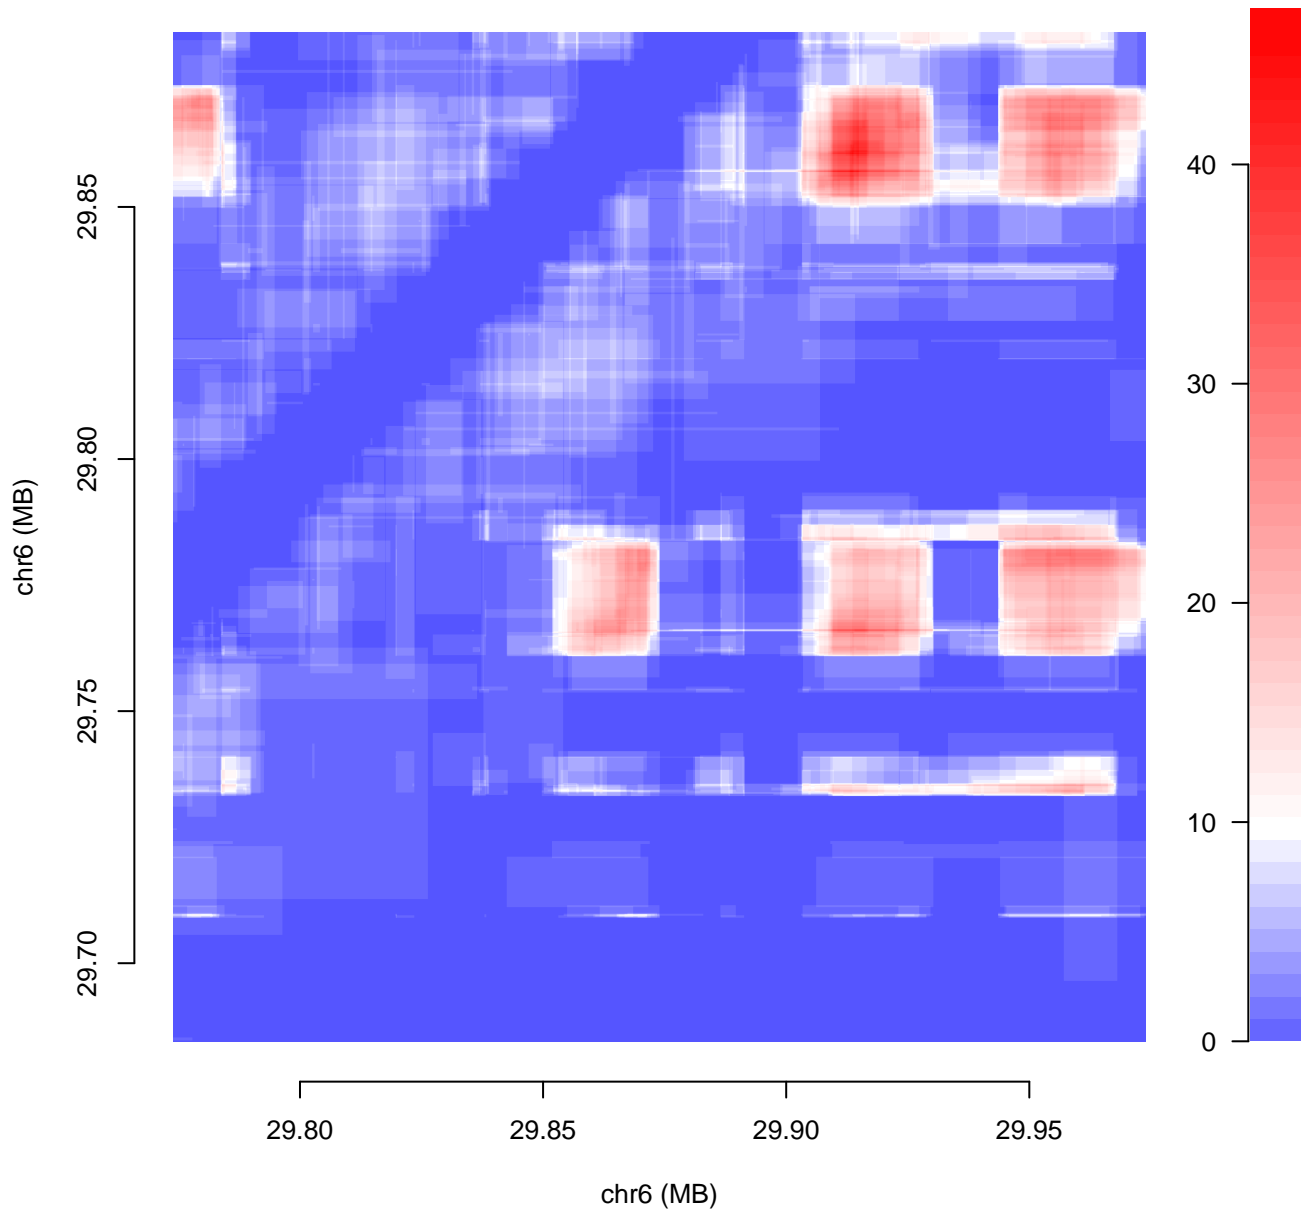

Supplement: Supplemental_Data.zip [file event_237.pdf › event_237.pdf]

Barcode

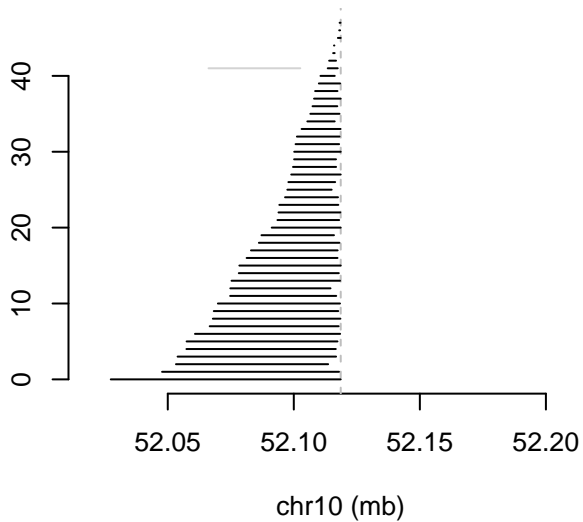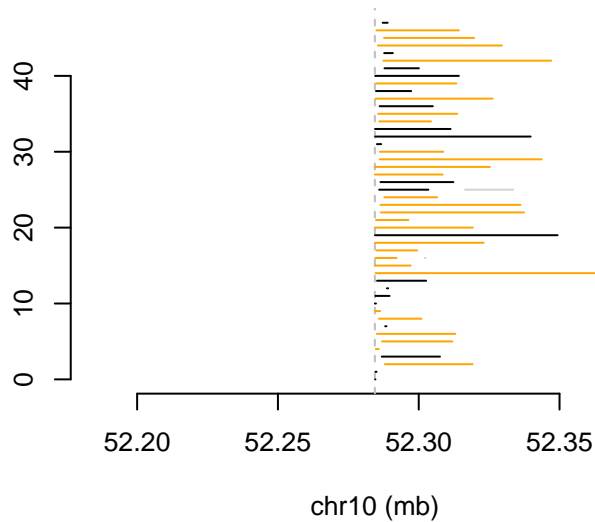

Copy number

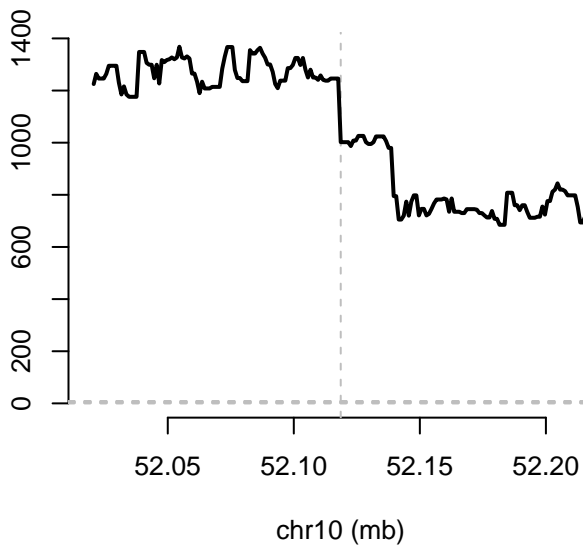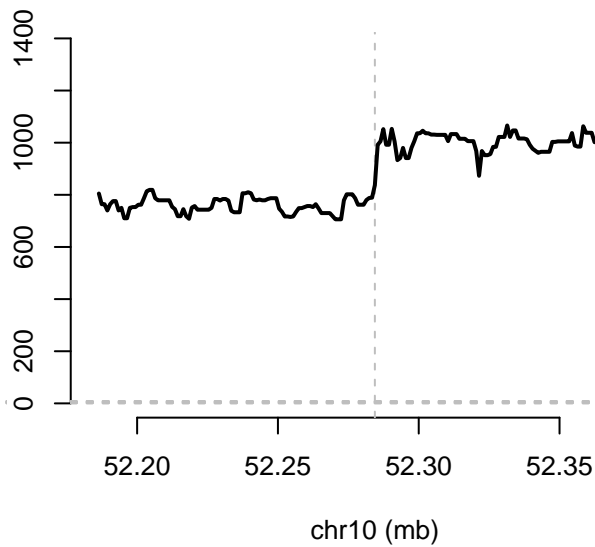

K562 chr10:52,284,428::chr10:52,118,618—+

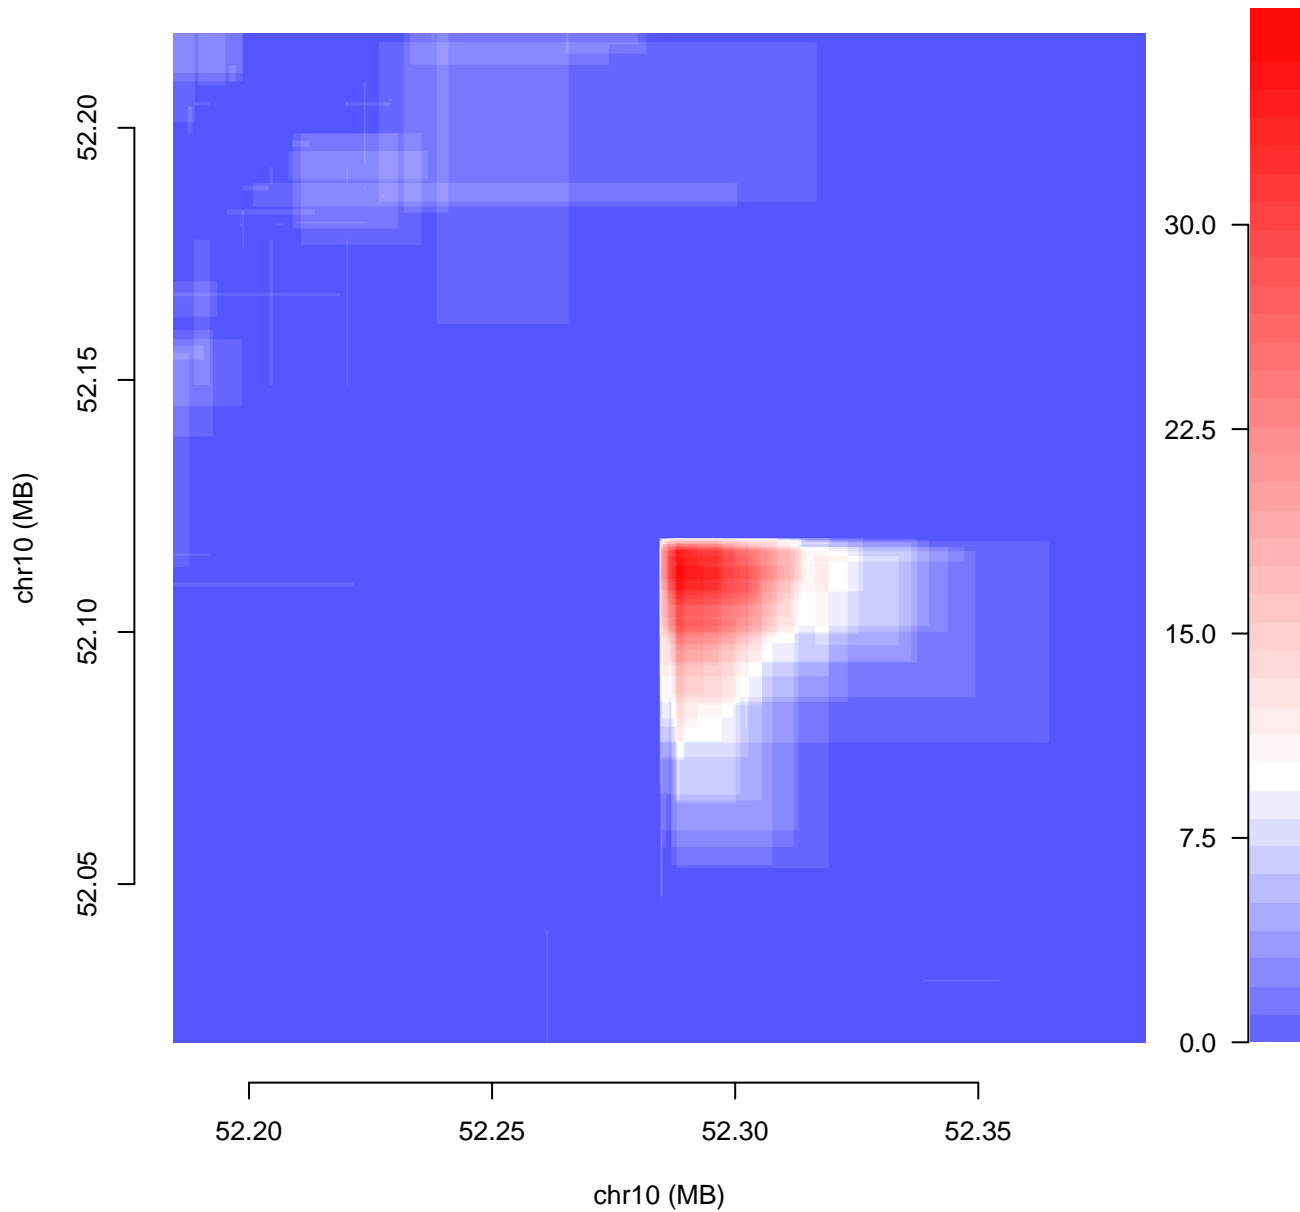

Supplement: Supplemental_Data.zip [file event_238.pdf › event_238.pdf]

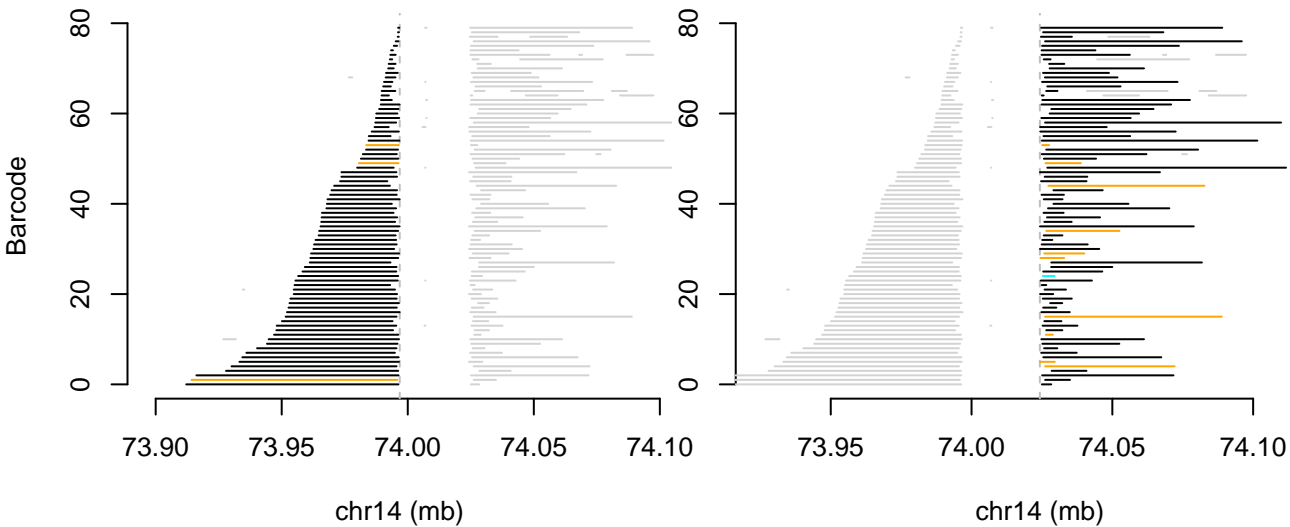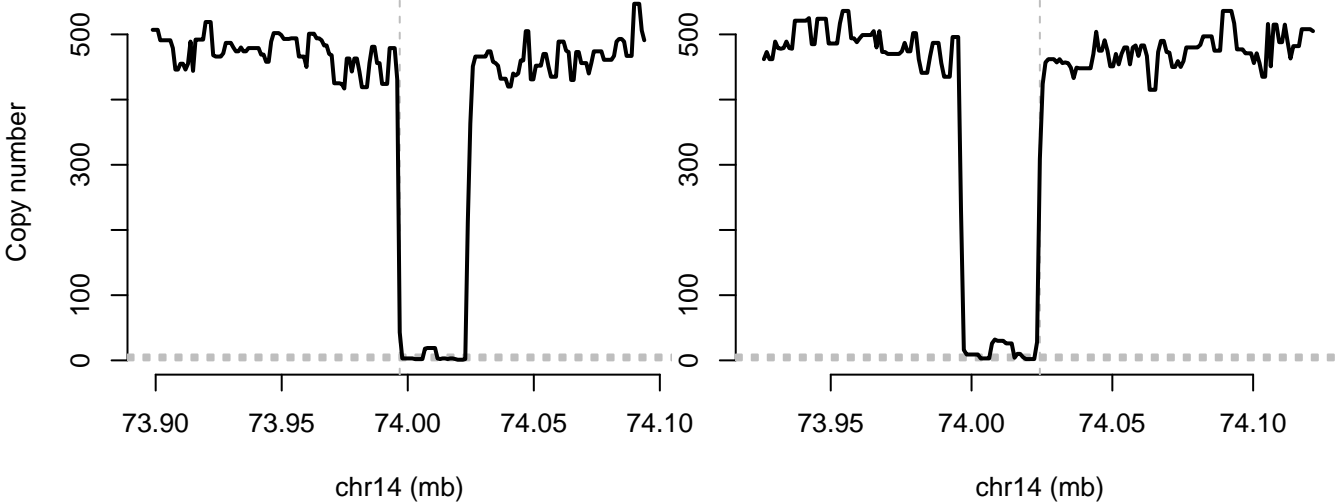

K562 chr14:74,024,267::chr14:73,996,819-+

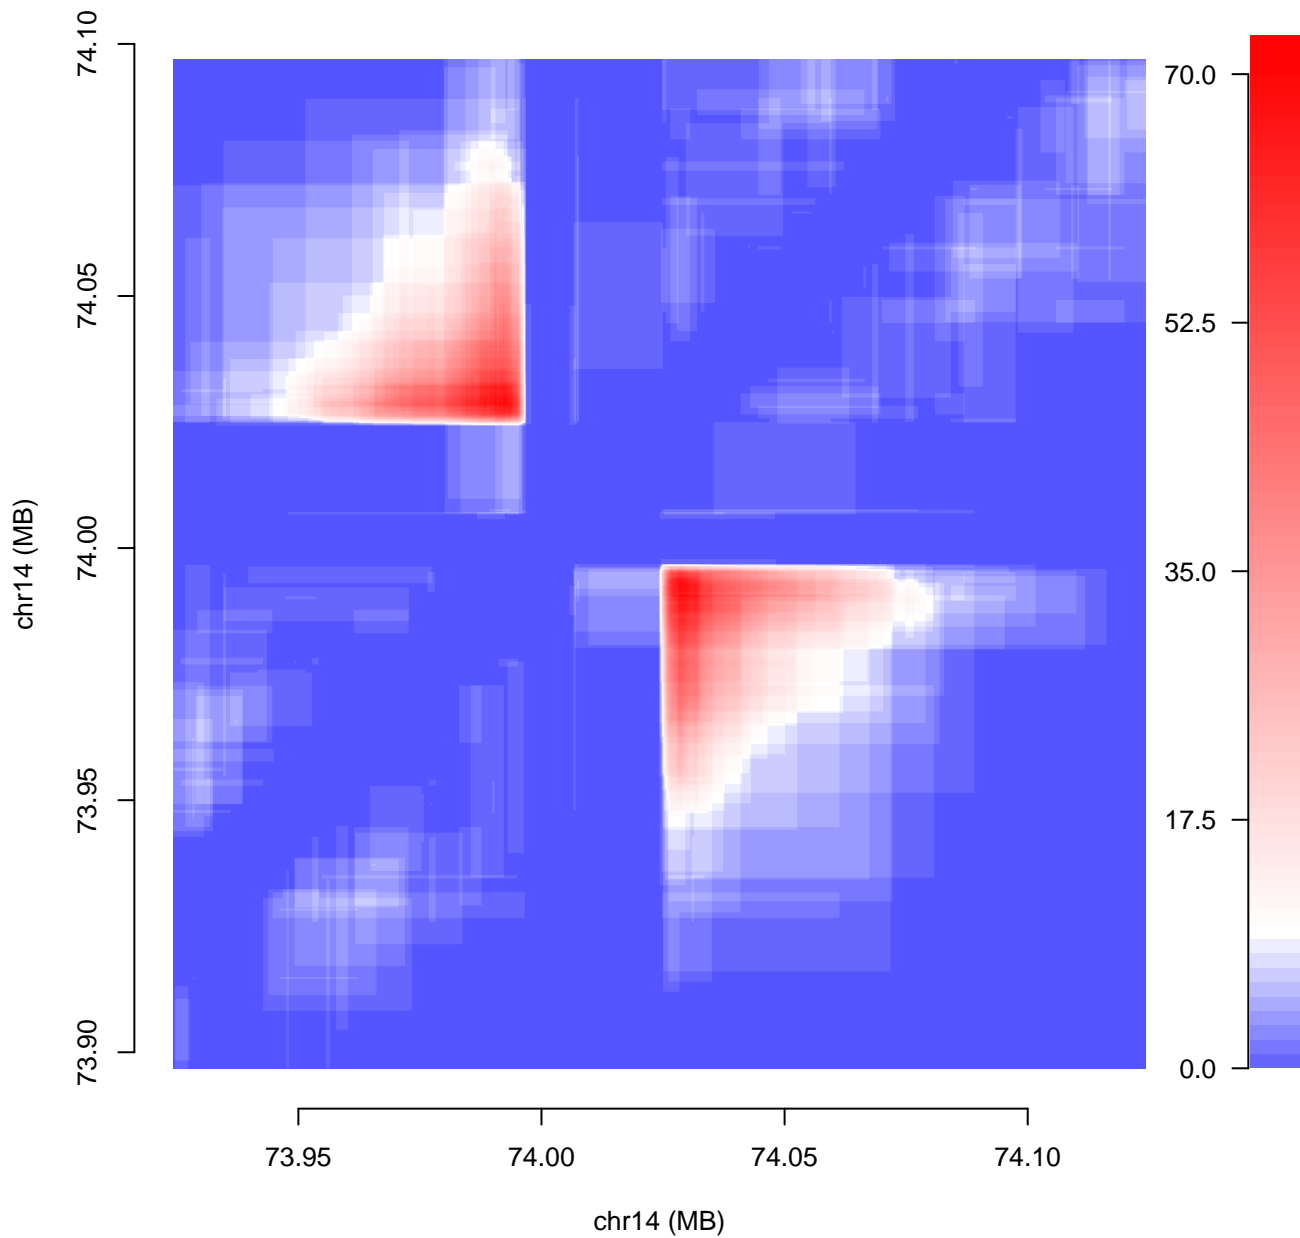

Supplement: Supplemental_Data.zip [file event_239.pdf › event_239.pdf]

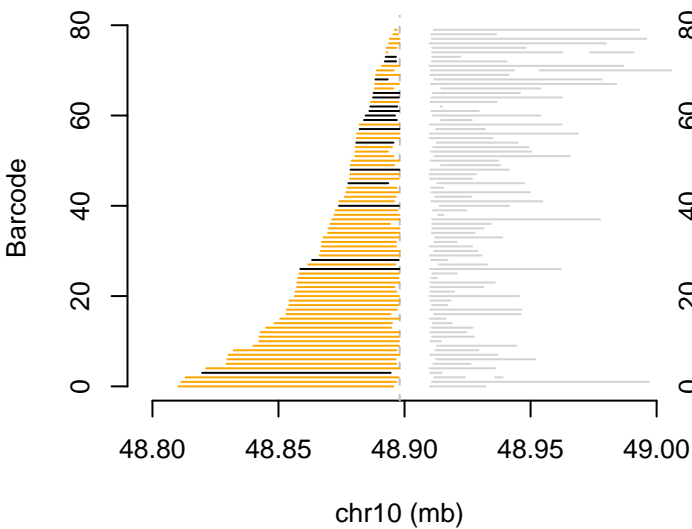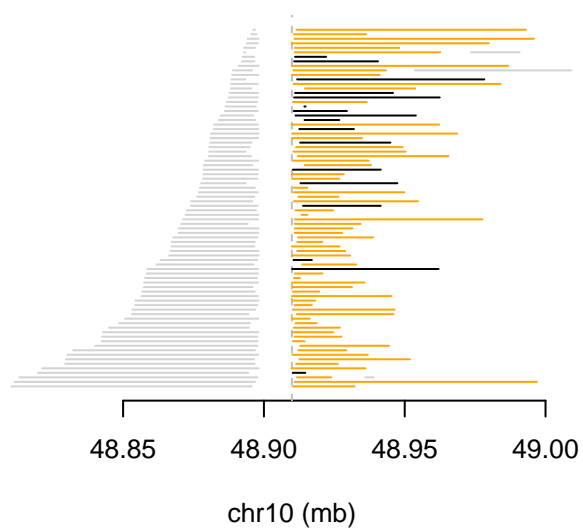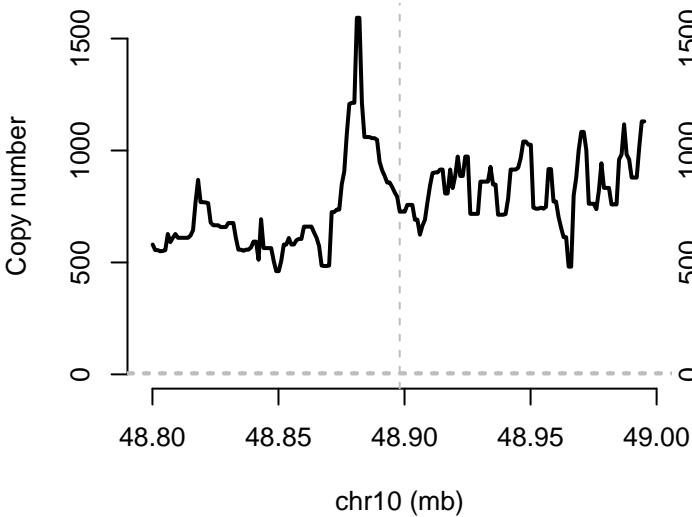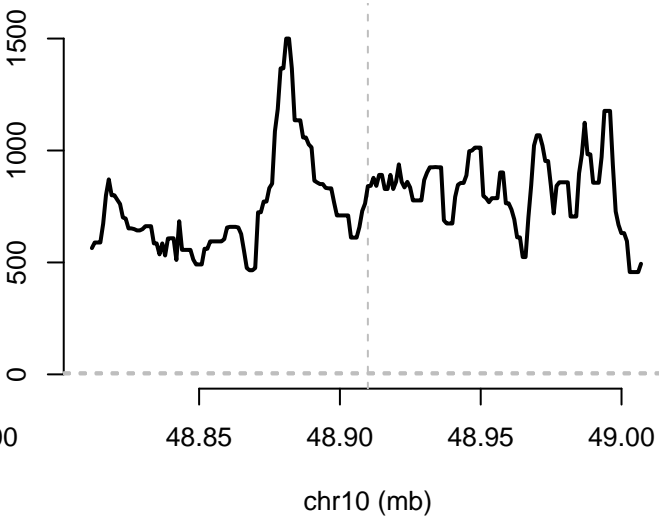

K562 chr10:48,909,926::chr10:48,898,101-+

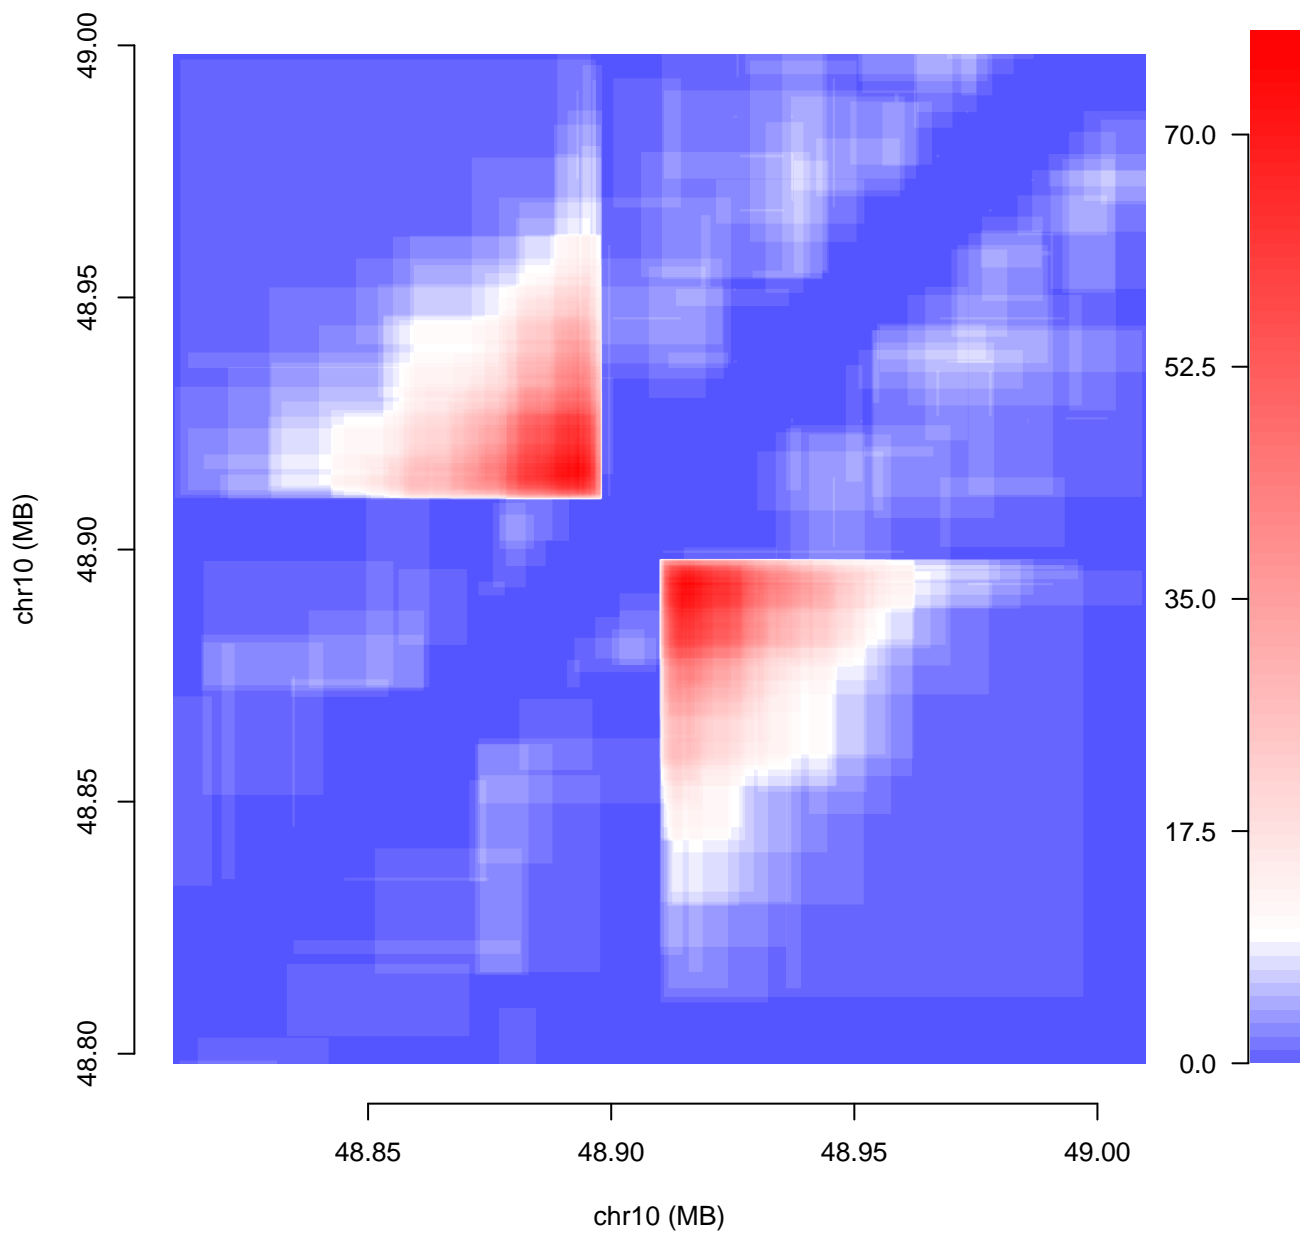

Supplement: Supplemental_Data.zip [file event_24.pdf › event_24.pdf]

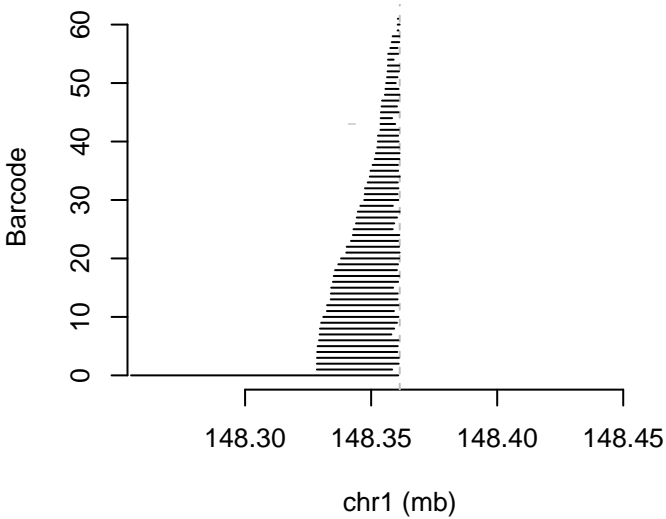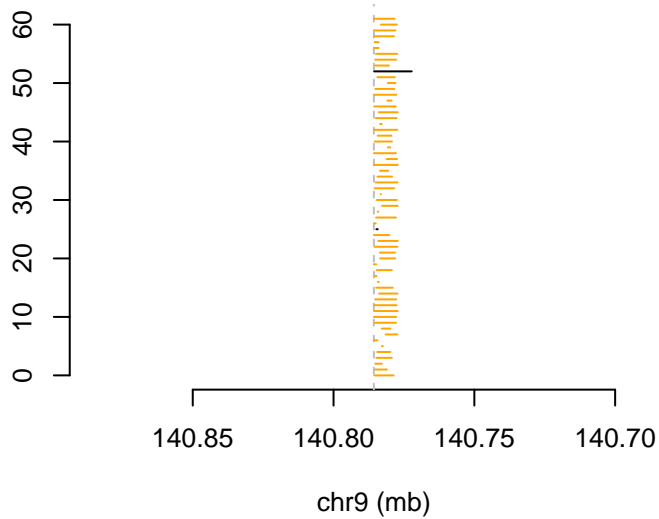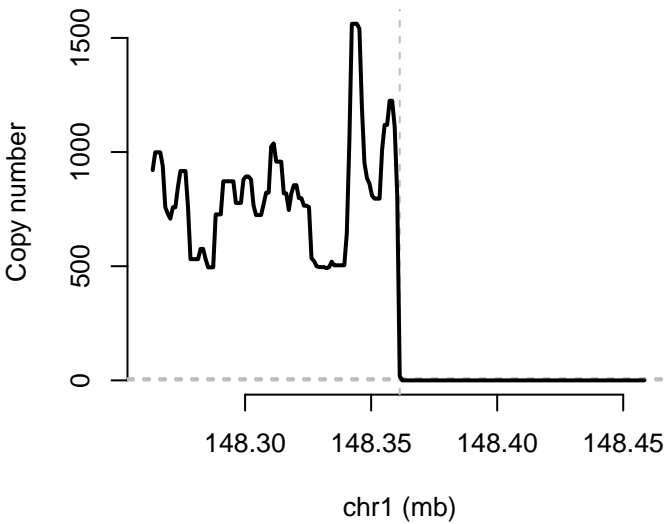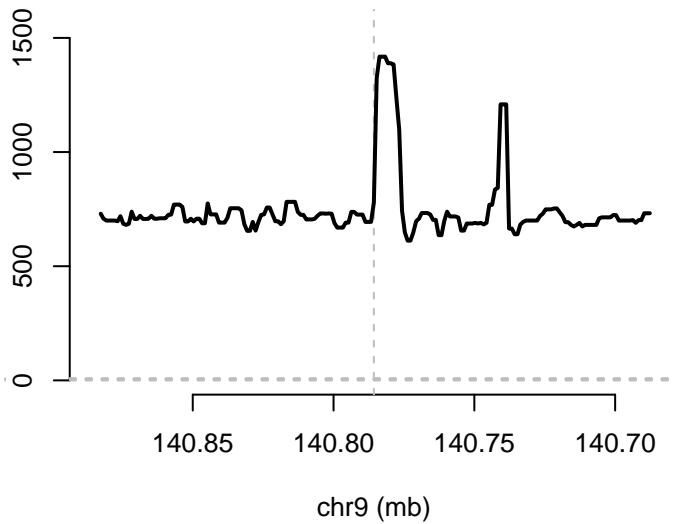

K562 chr9:140,785,679::chr1:148,361,343++

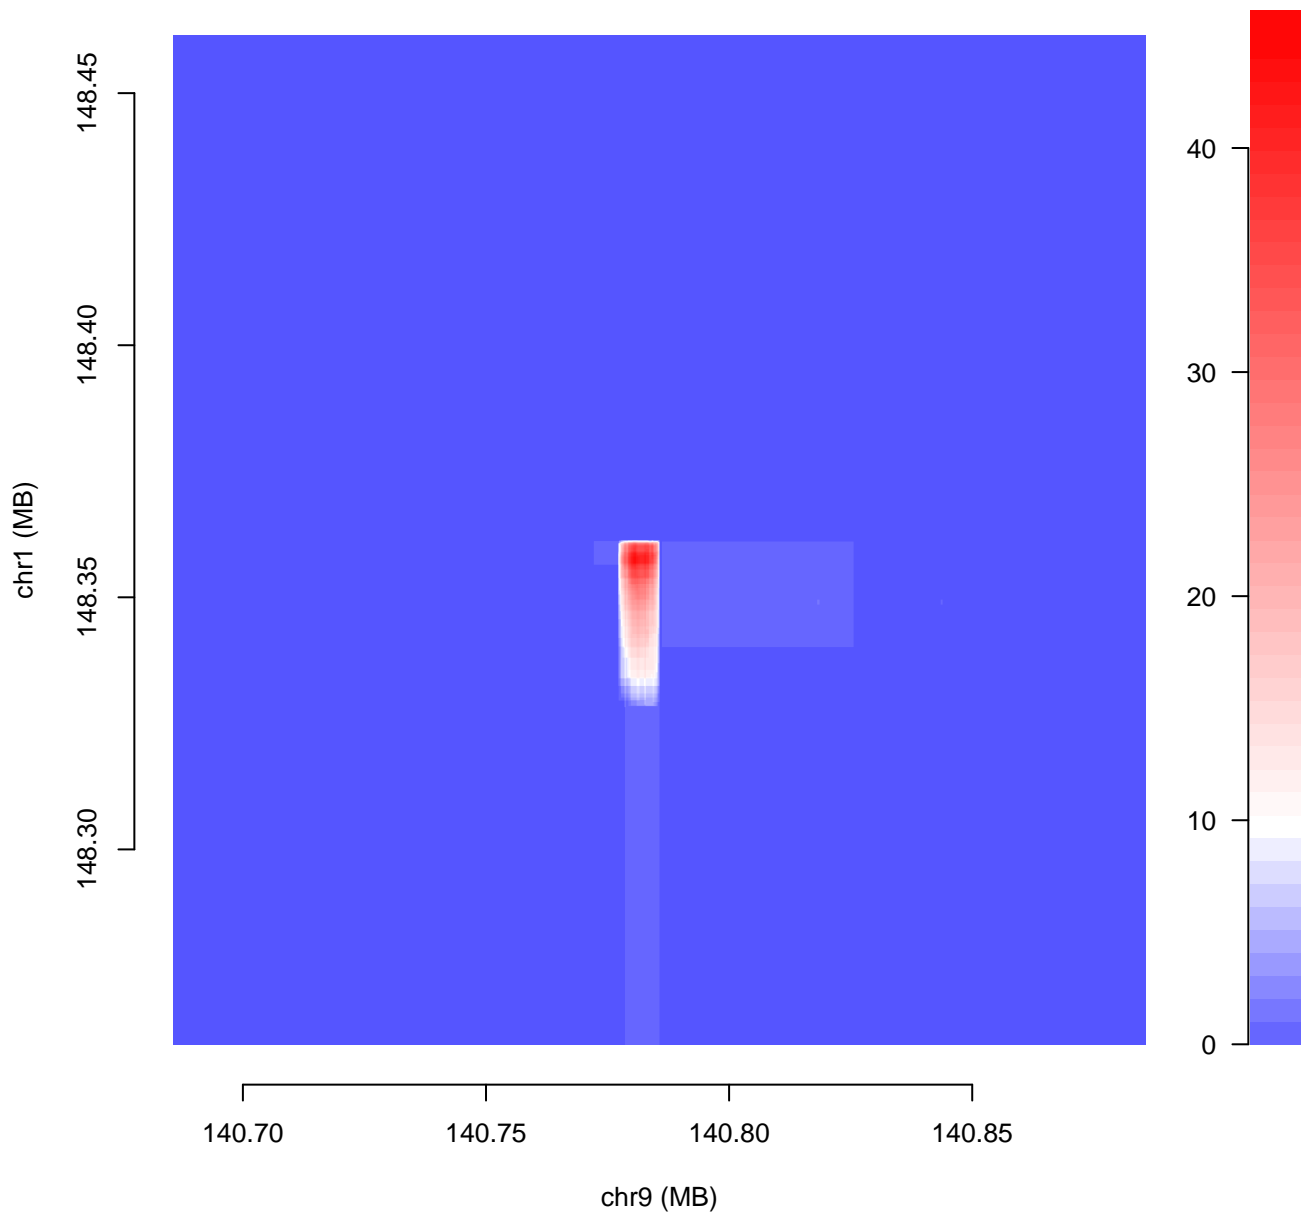

Supplement: Supplemental_Data.zip [file event_240.pdf › event_240.pdf]

Barcode

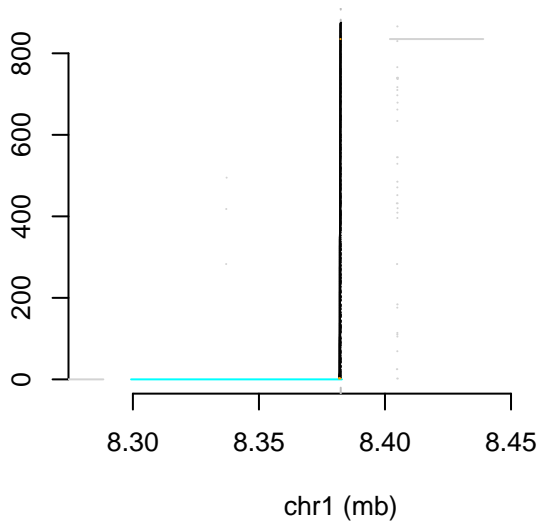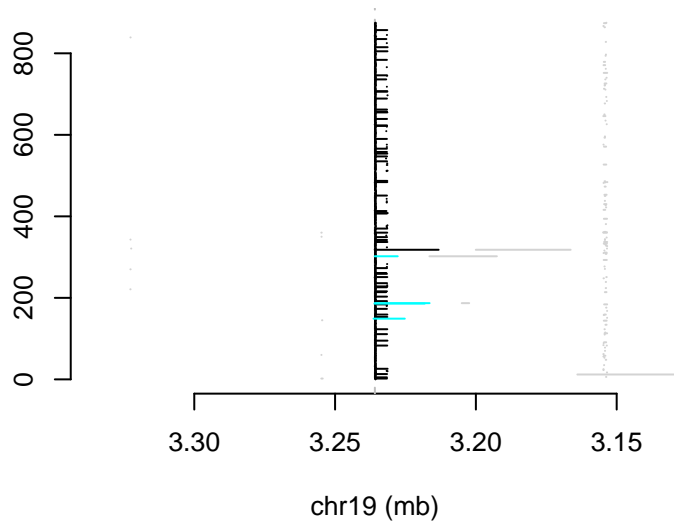

Copy number

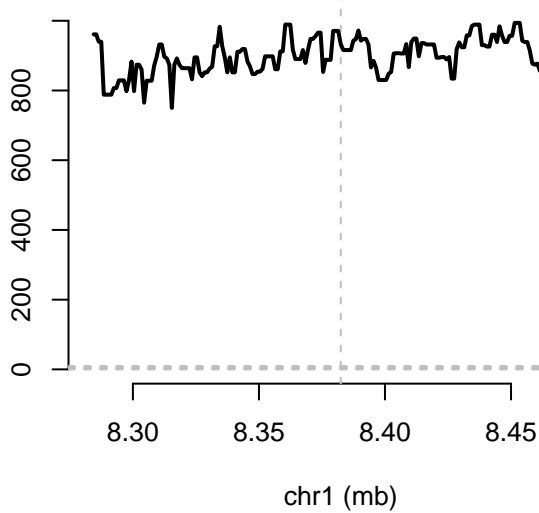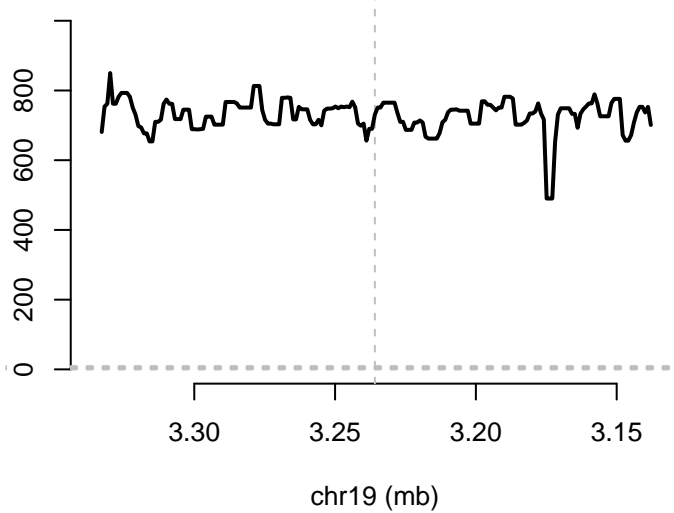

K562 chr1:8,382,451::chr19:3,235,868++

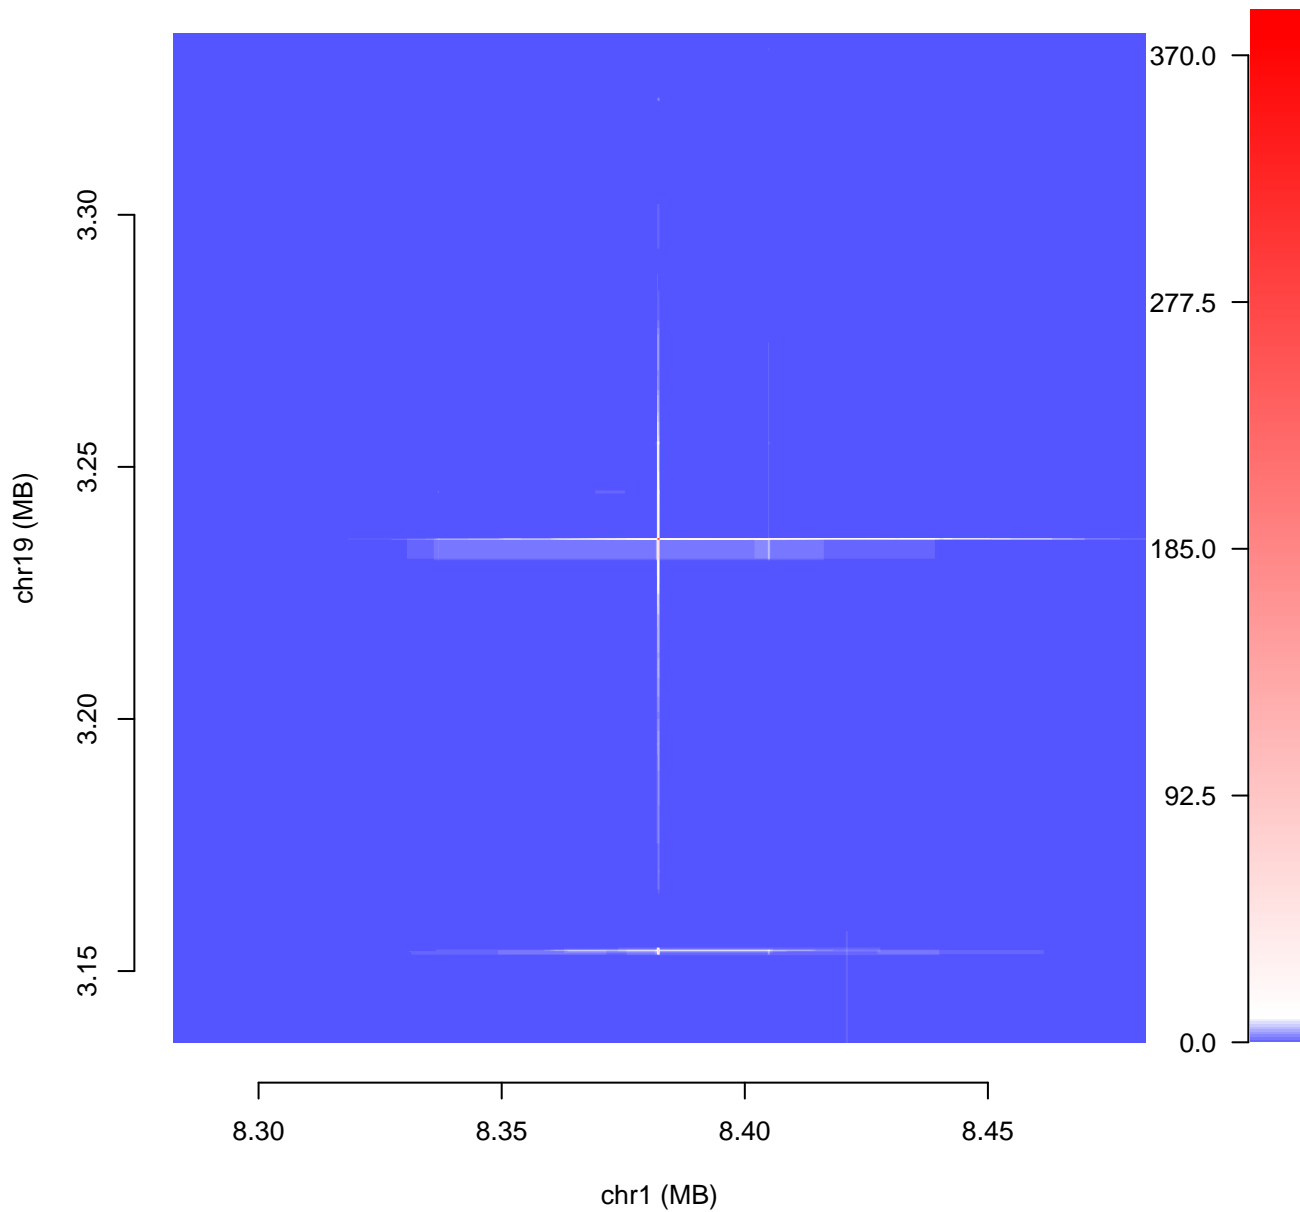

Supplement: Supplemental_Data.zip [file event_241.pdf › event_241.pdf]

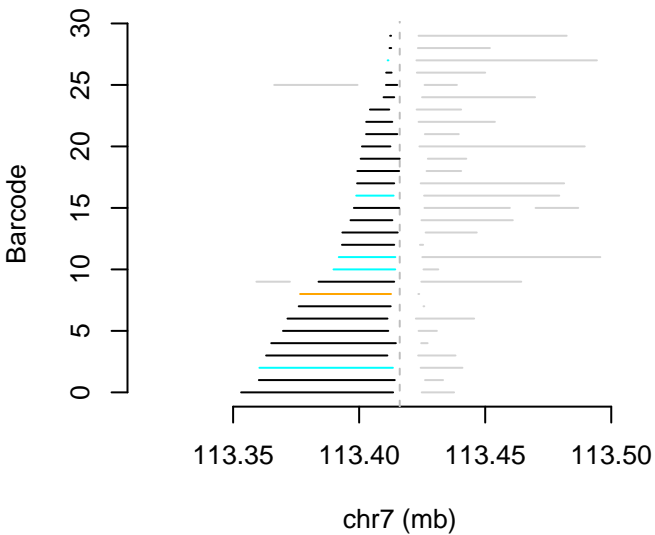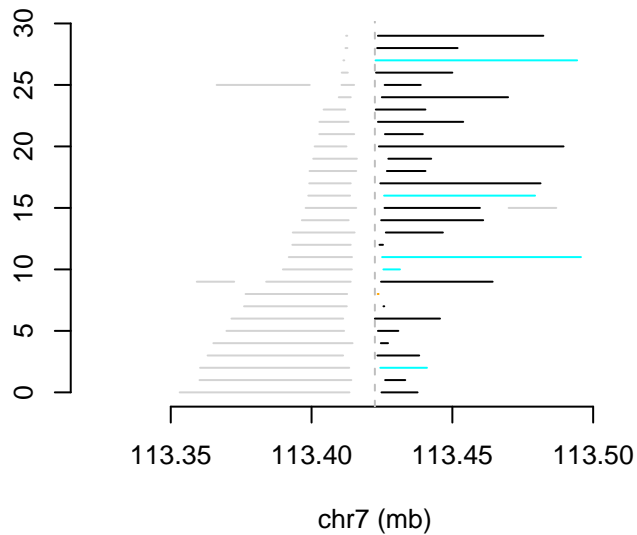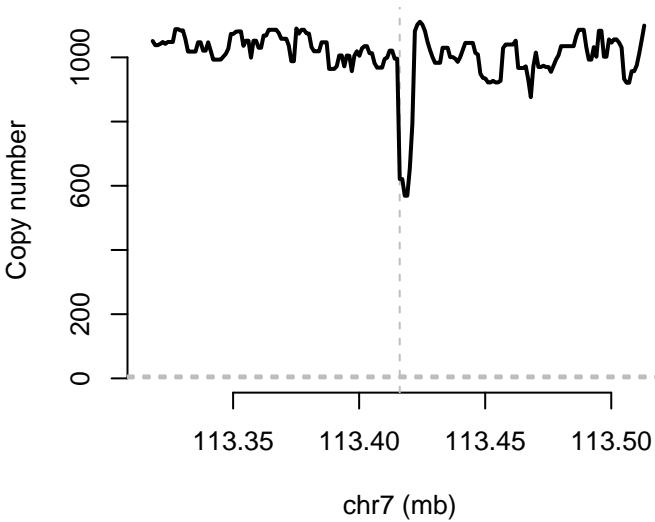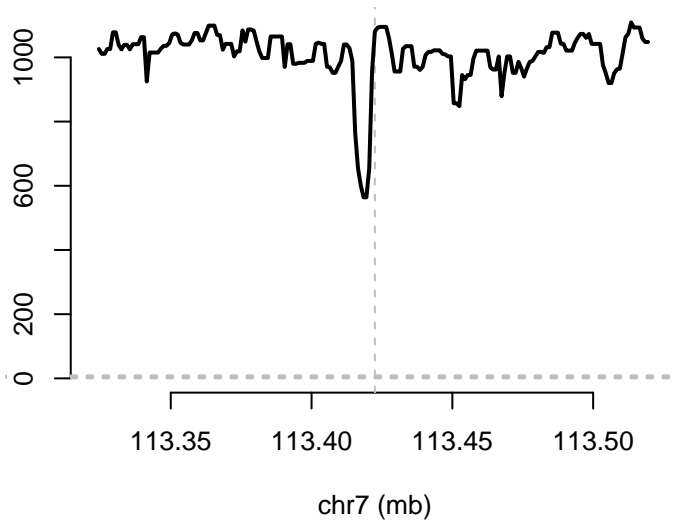

K562 chr7:113,416,100::chr7:113,422,485+-

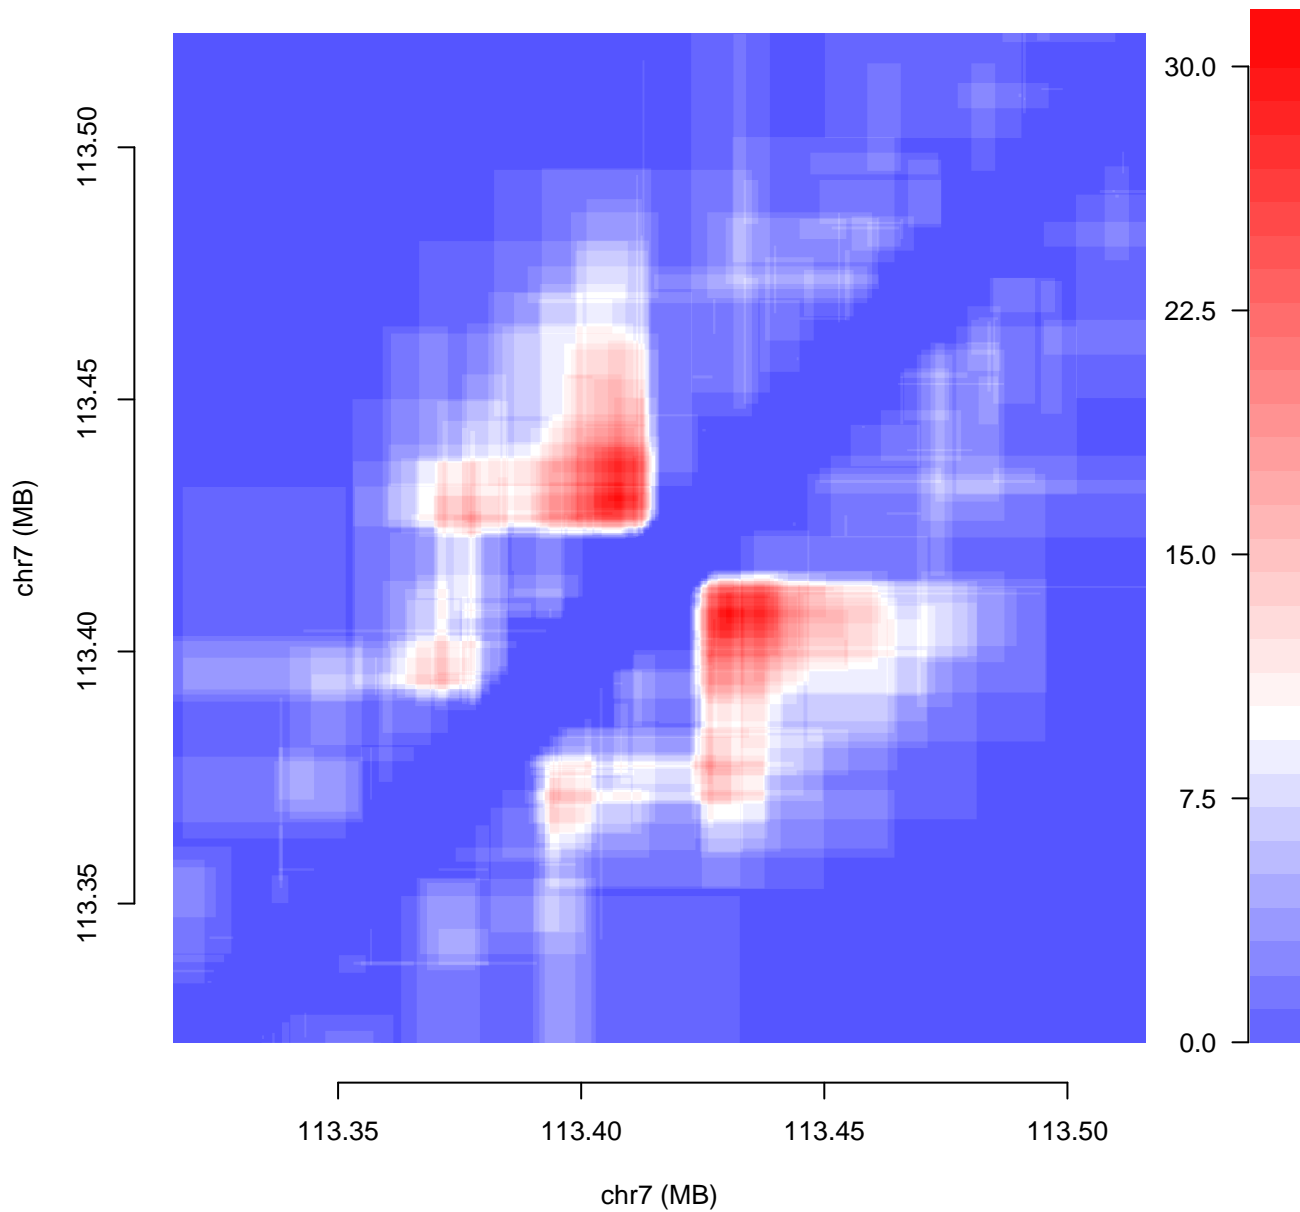

Supplement: Supplemental_Data.zip [file event_242.pdf › event_242.pdf]

Barcode

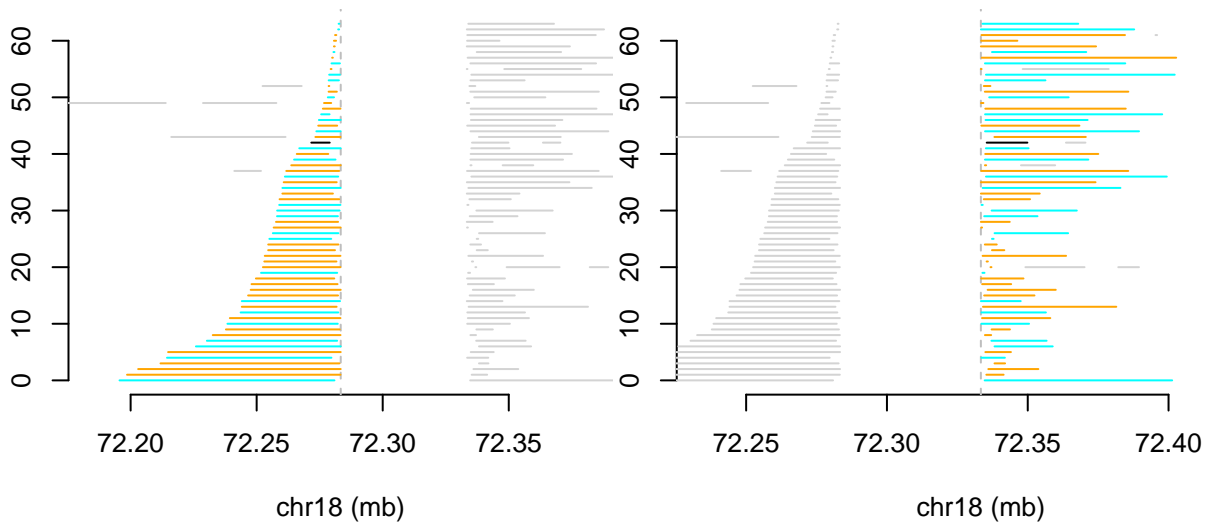

Copy number

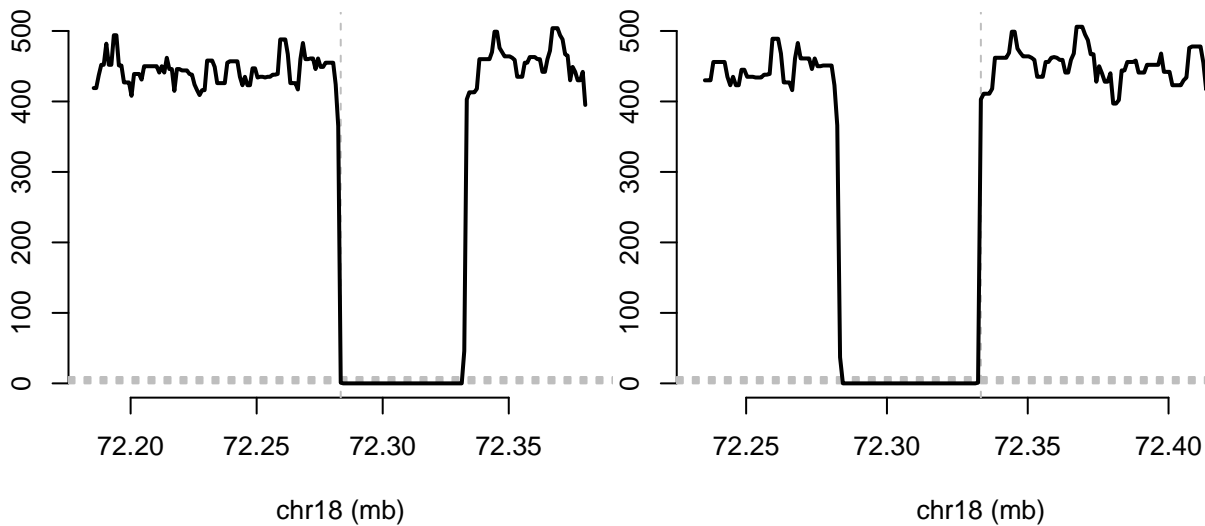

K562 chr18:72,283,354::chr18:72,333,352+-

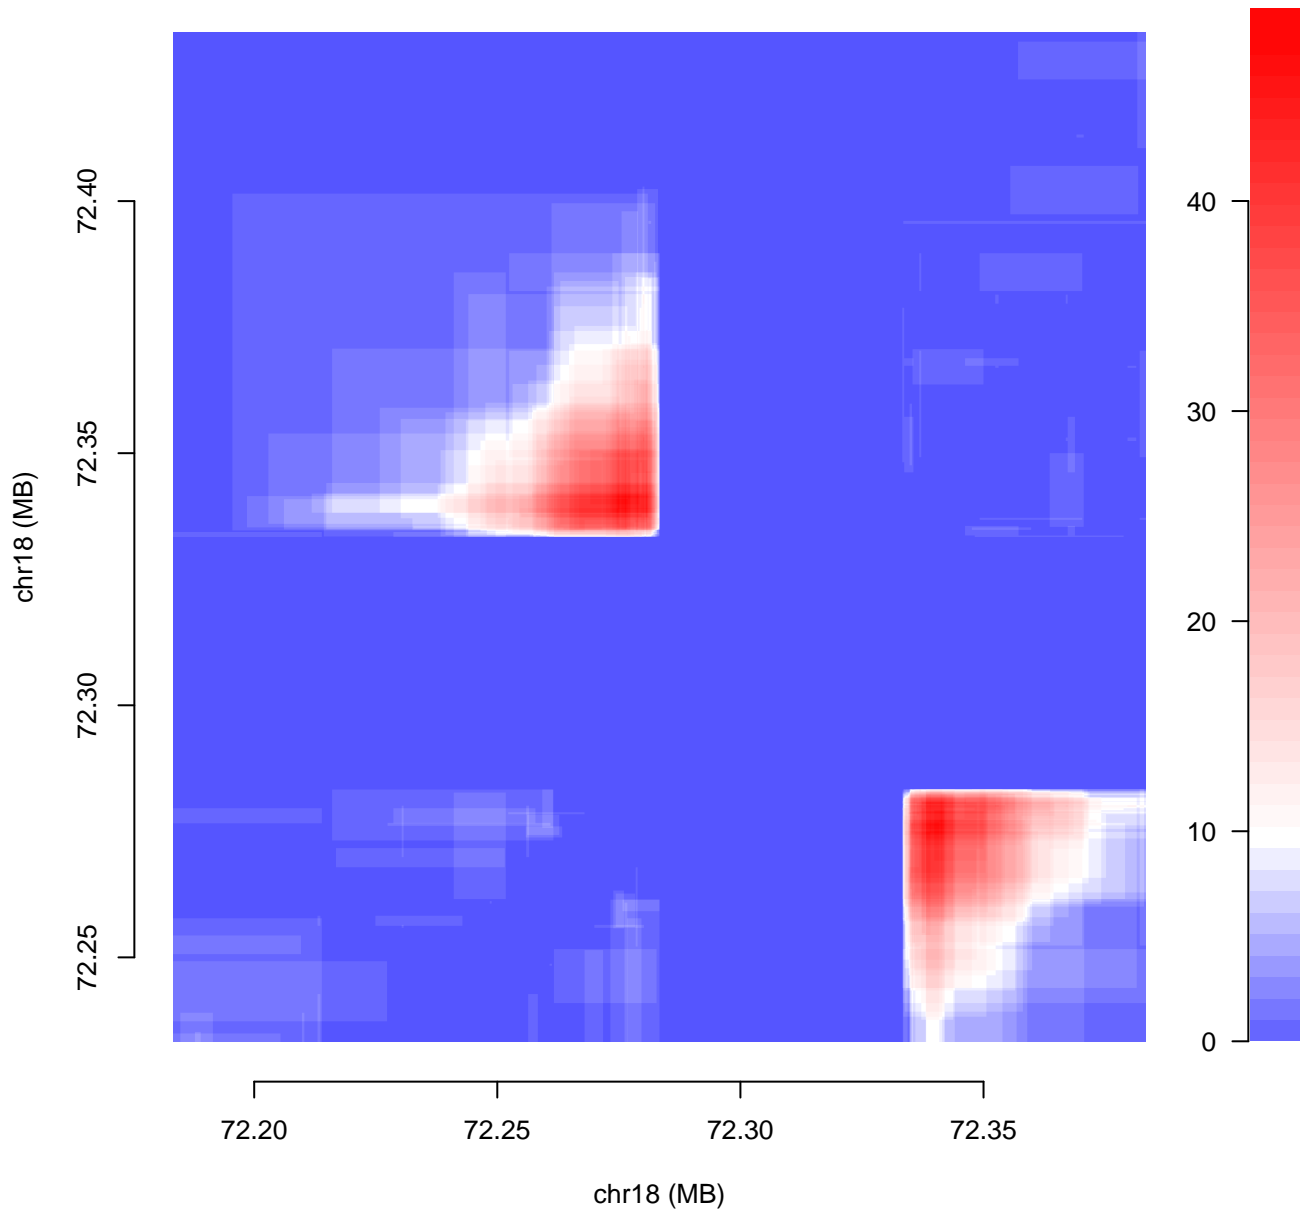

Supplement: Supplemental_Data.zip [file event_243.pdf › event_243.pdf]

Barcode

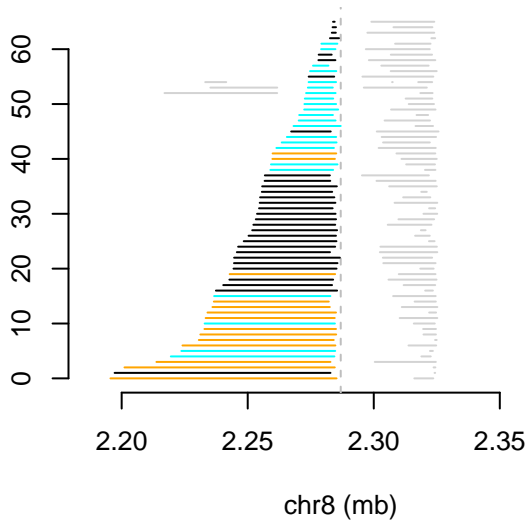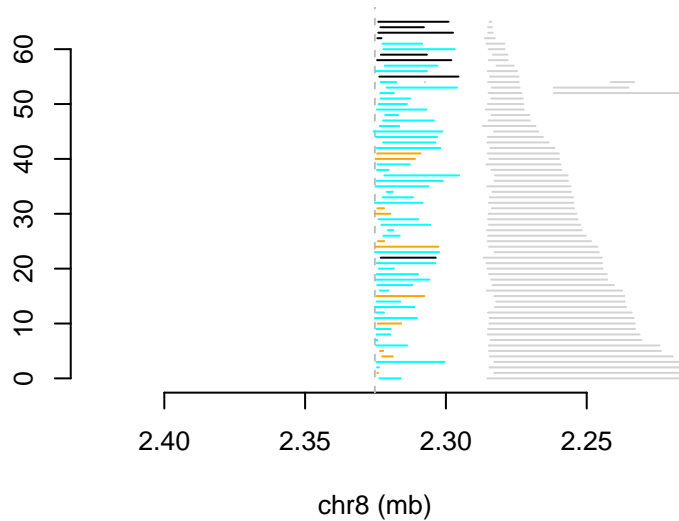

Copy number

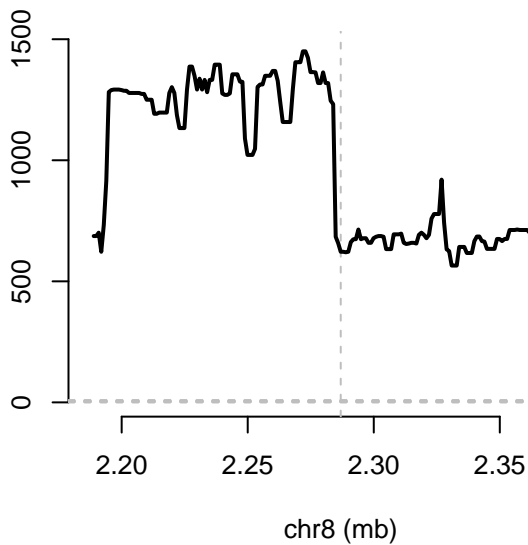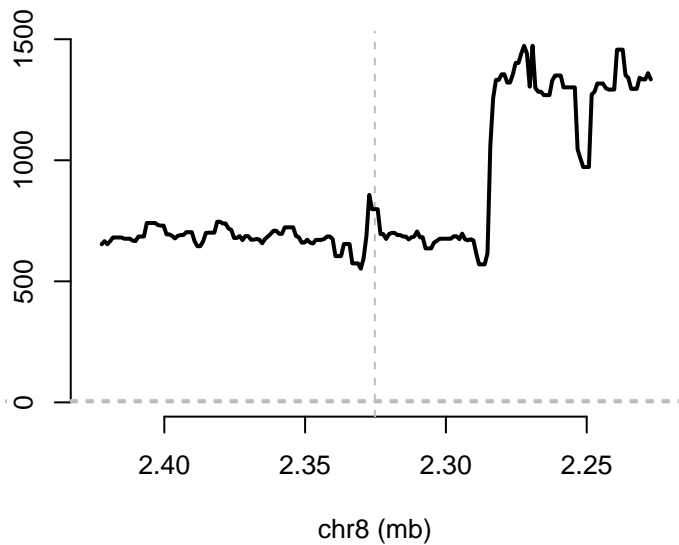

K562 chr8:2,286,902::chr8:2,325,223++

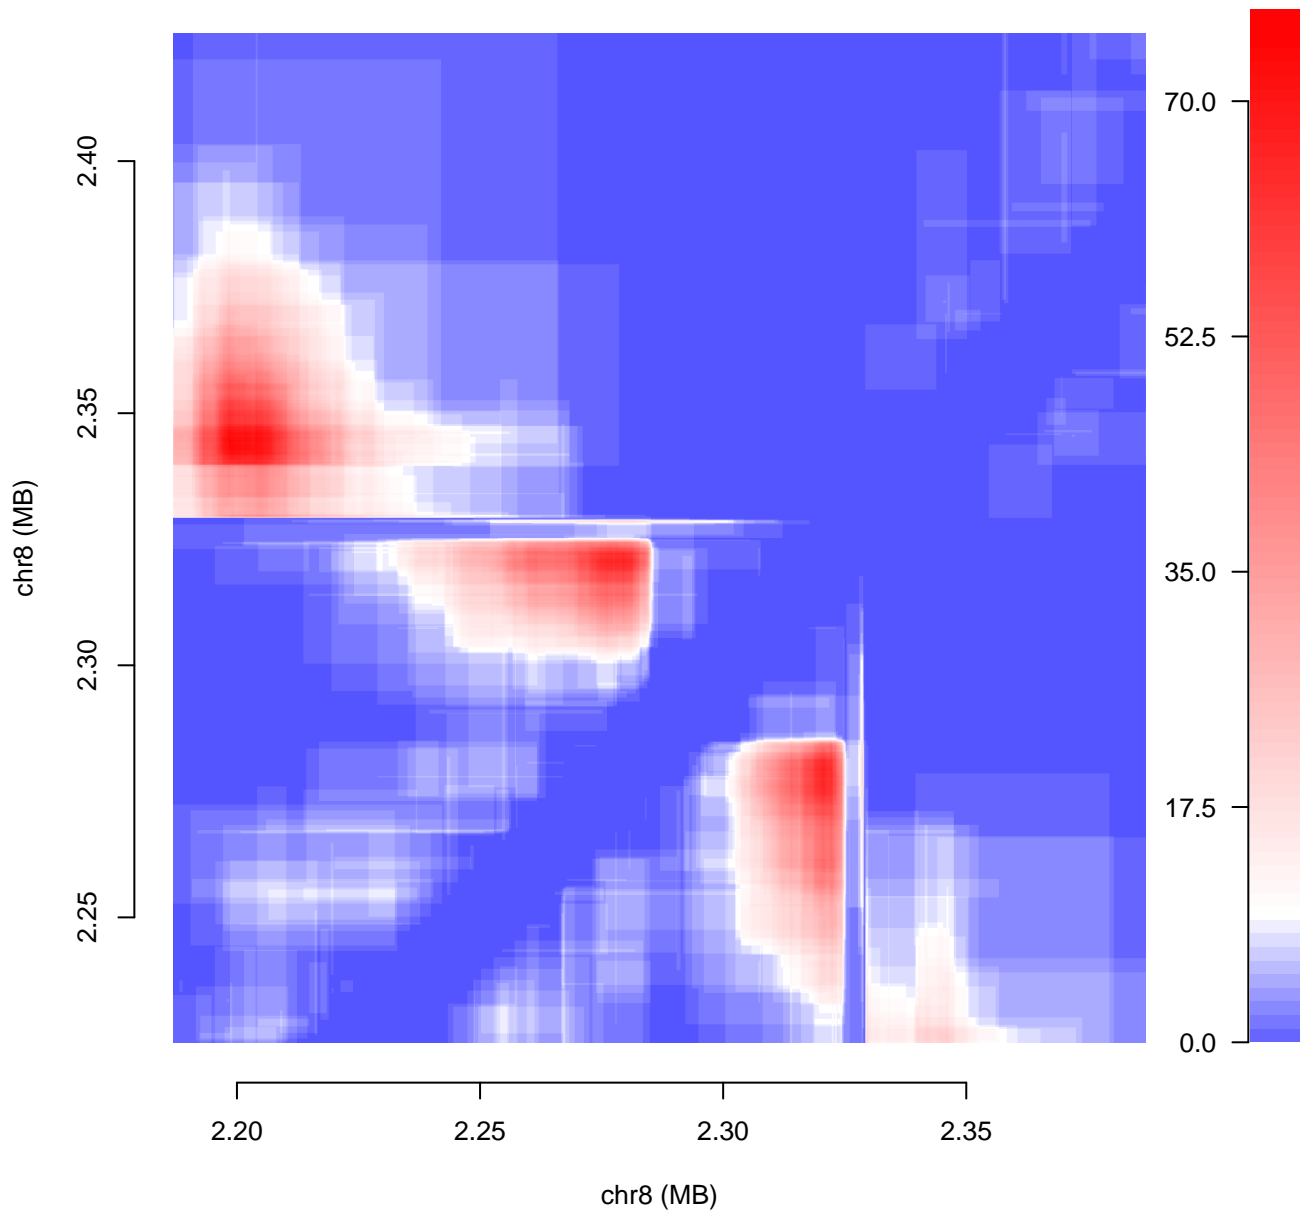

Supplement: Supplemental_Data.zip [file event_244.pdf › event_244.pdf]

Barcode

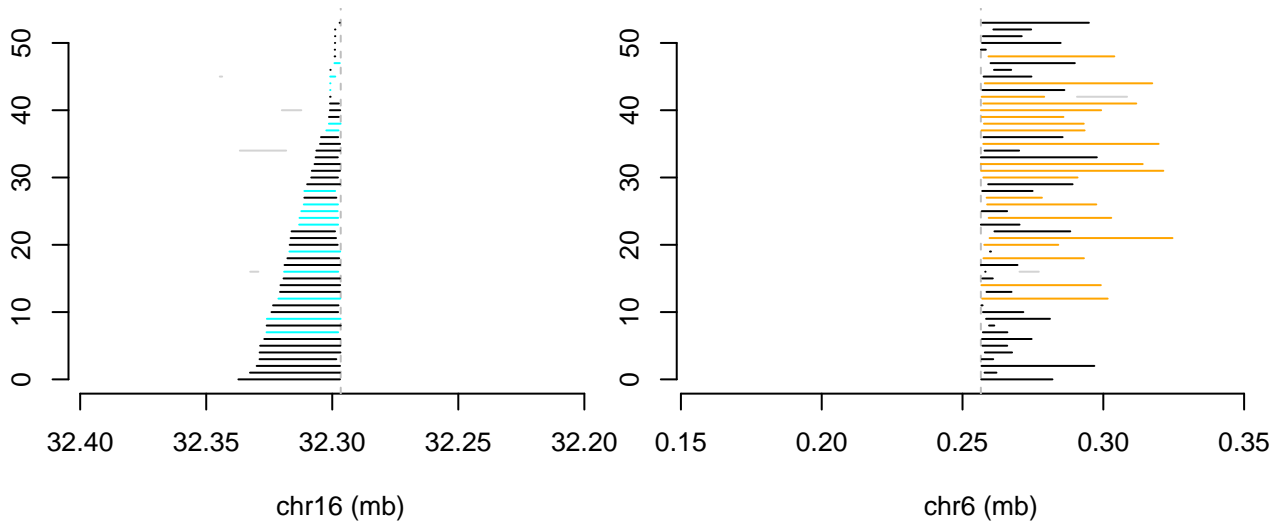

Copy number

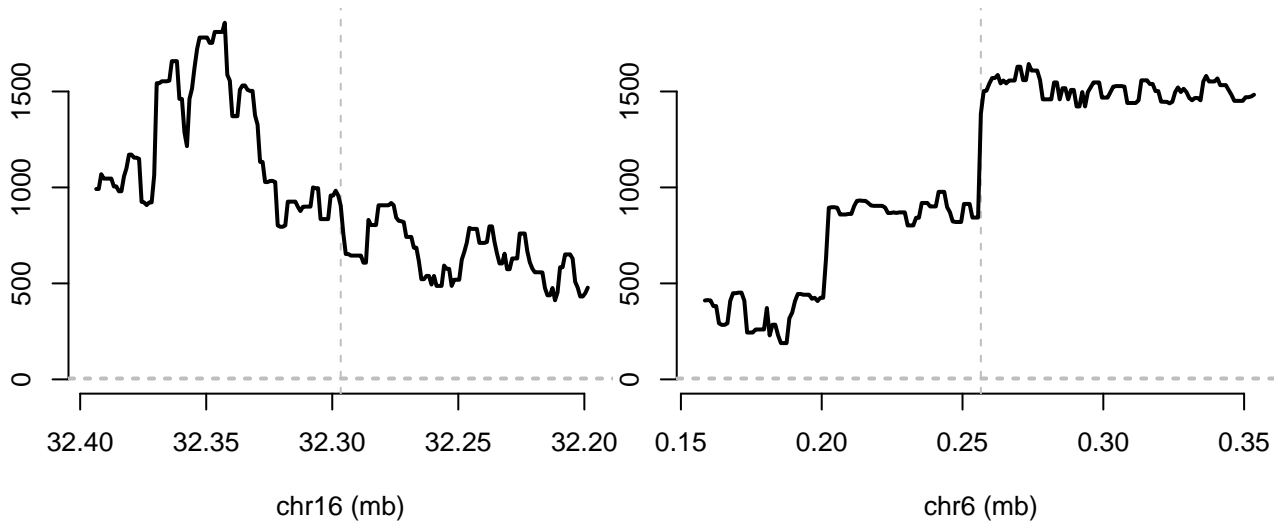

K562 chr6:256,517::chr16:32,296,634--

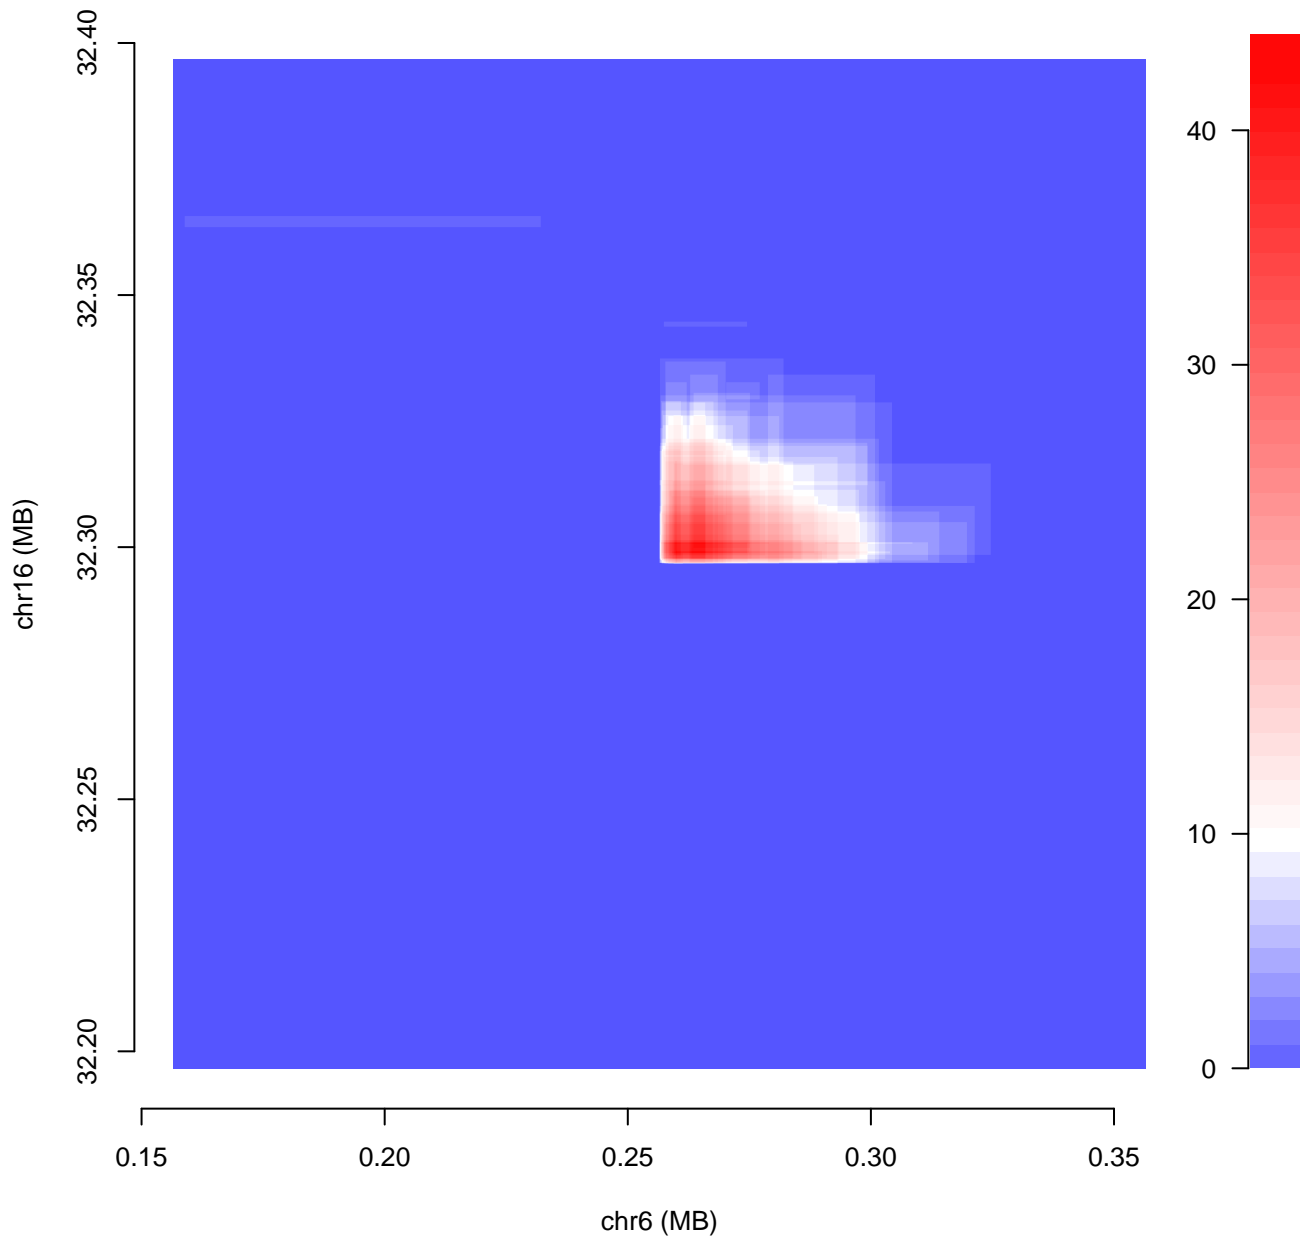

Supplement: Supplemental_Data.zip [file event_245.pdf › event_245.pdf]

Barcode

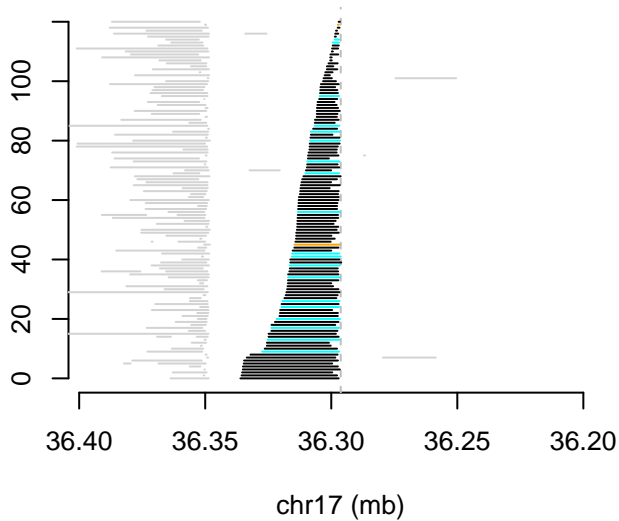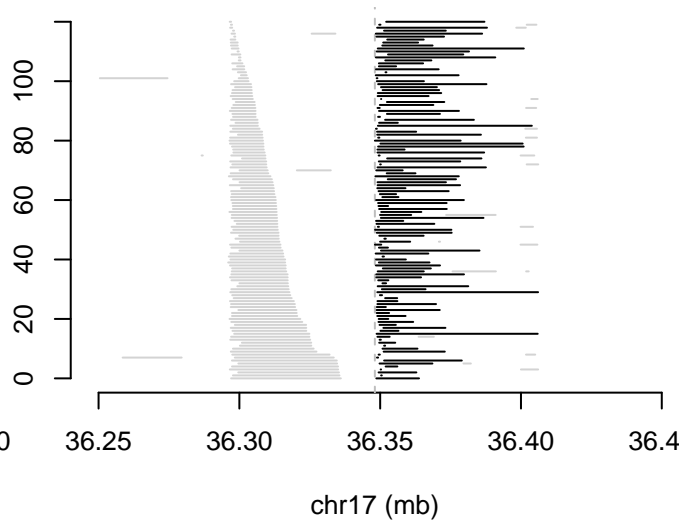

Copy number

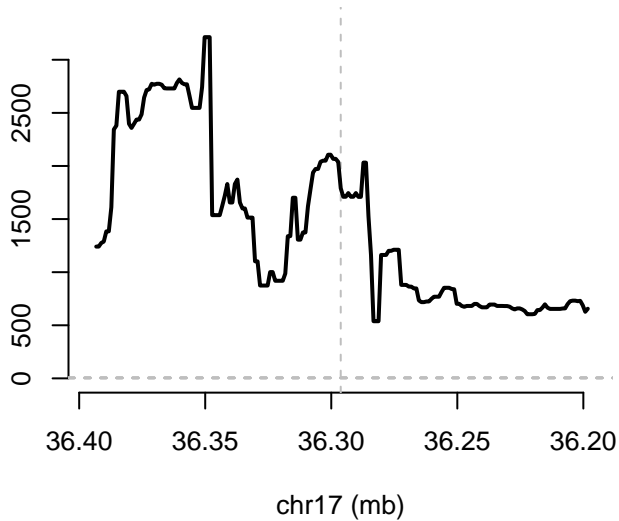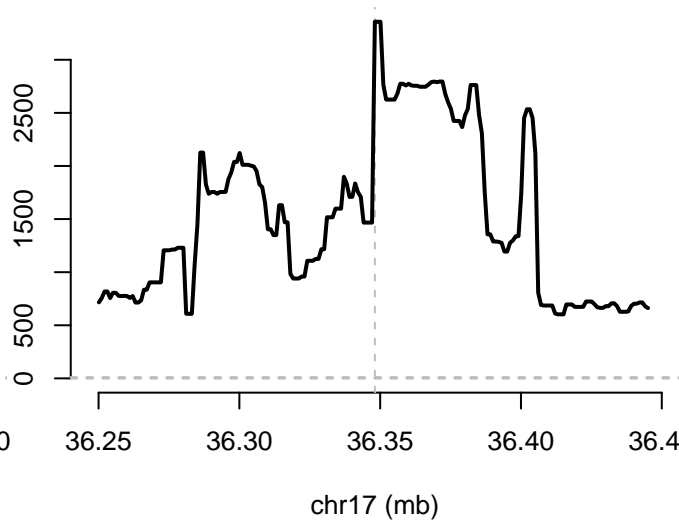

K562 chr17:36,296,239::chr17:36,348,119--

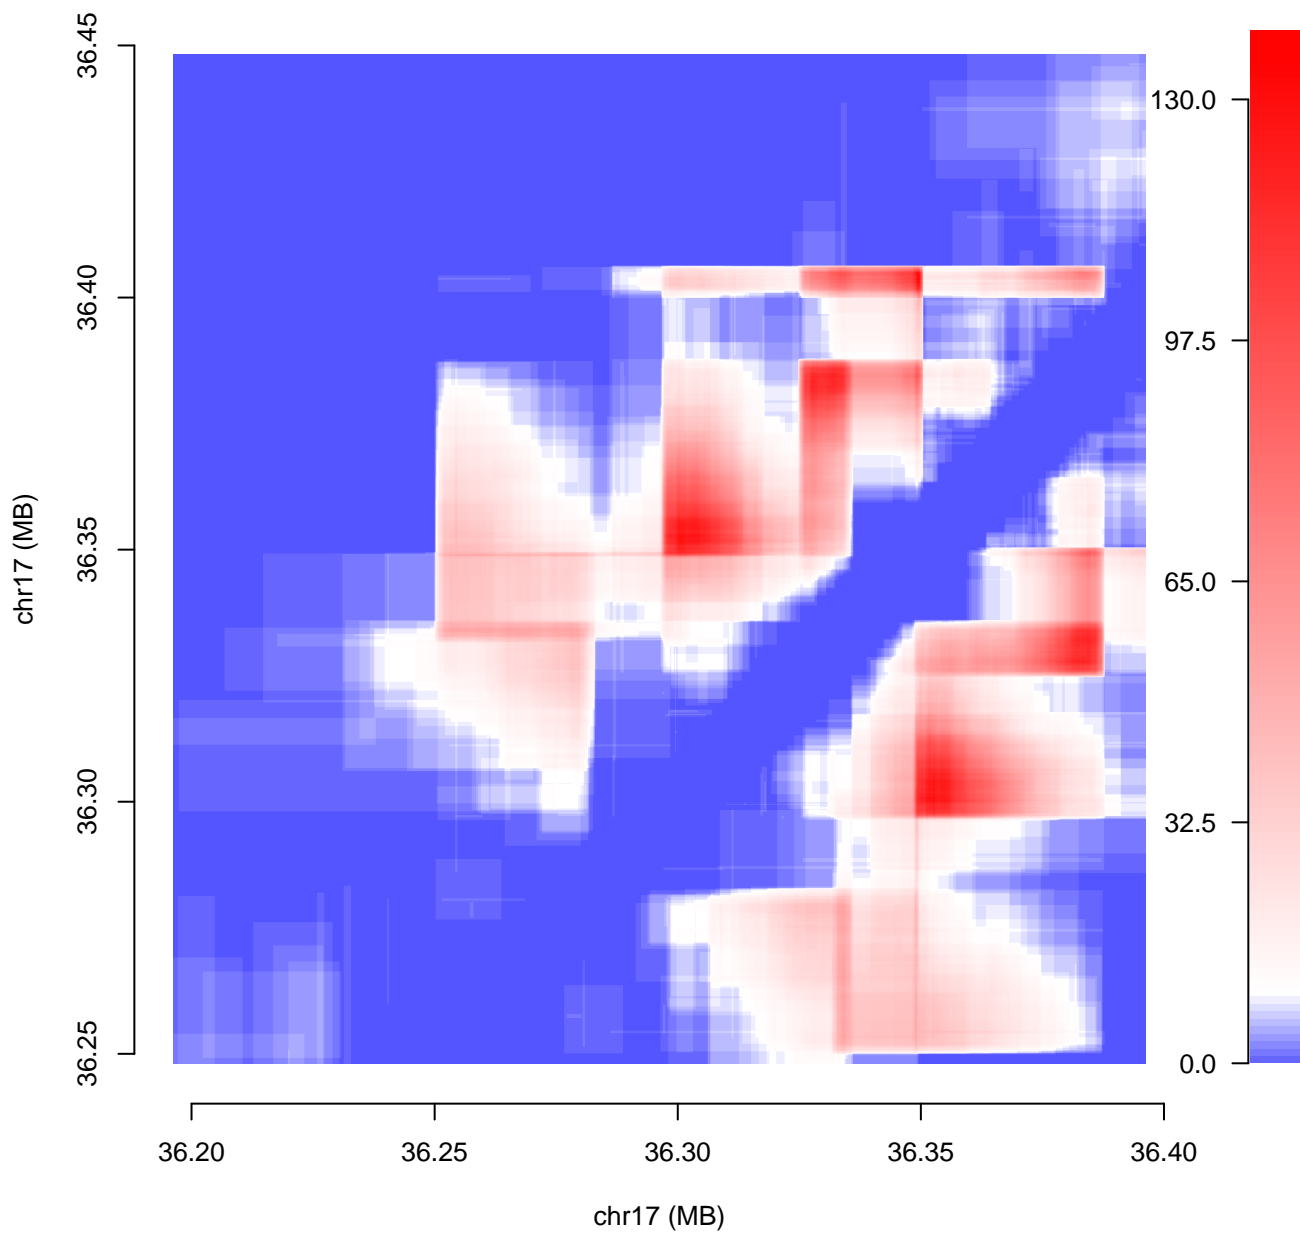

Supplement: Supplemental_Data.zip [file event_246.pdf › event_246.pdf]

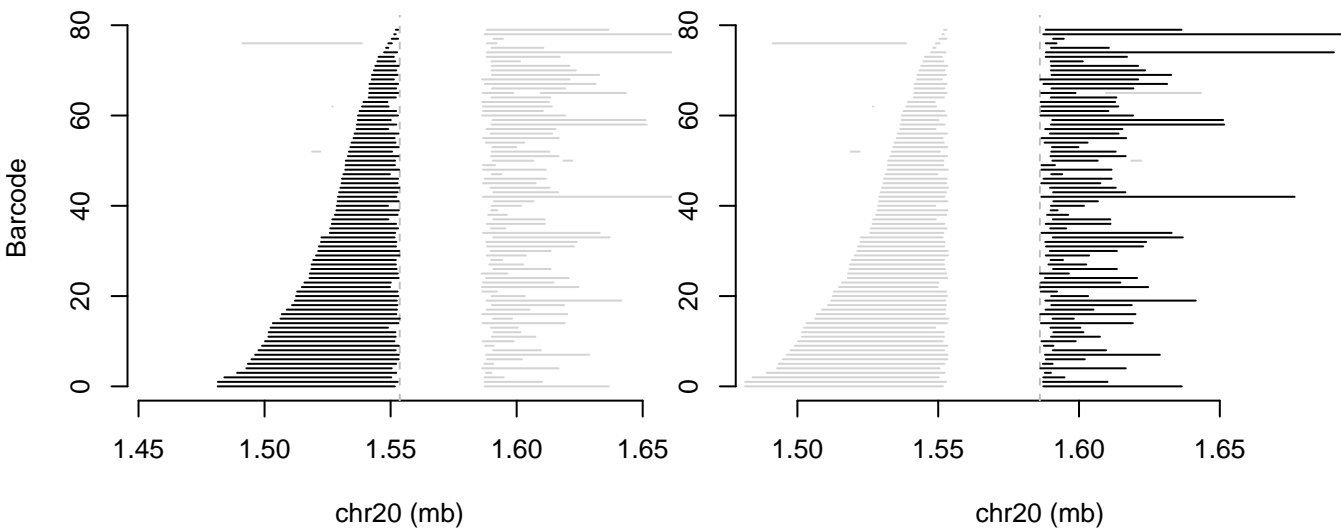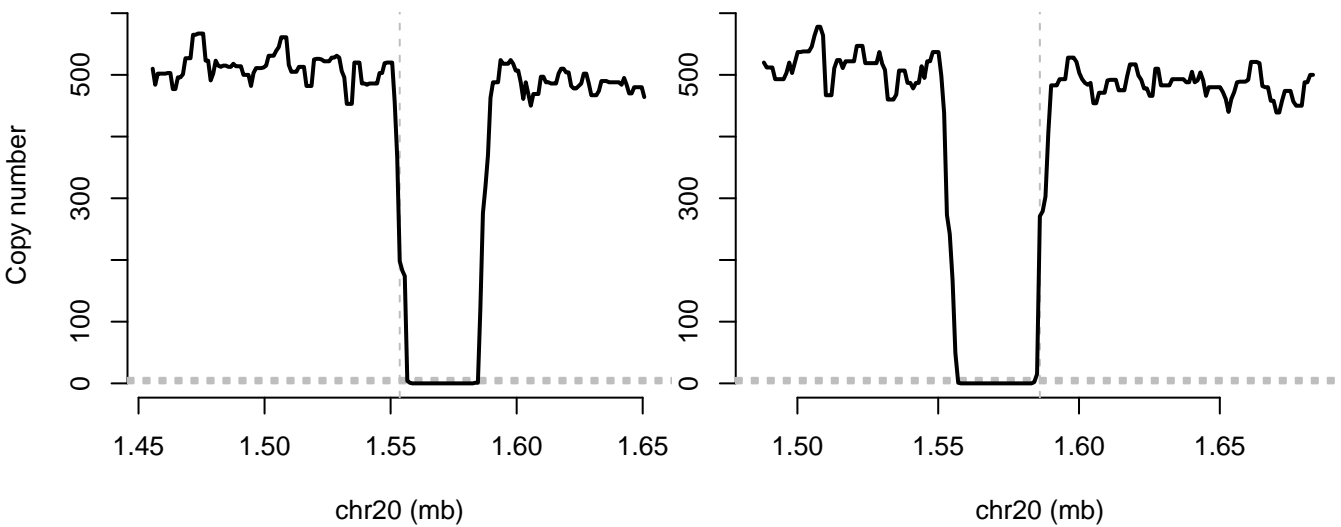

K562 chr20:1,586,097::chr20:1,553,621-+

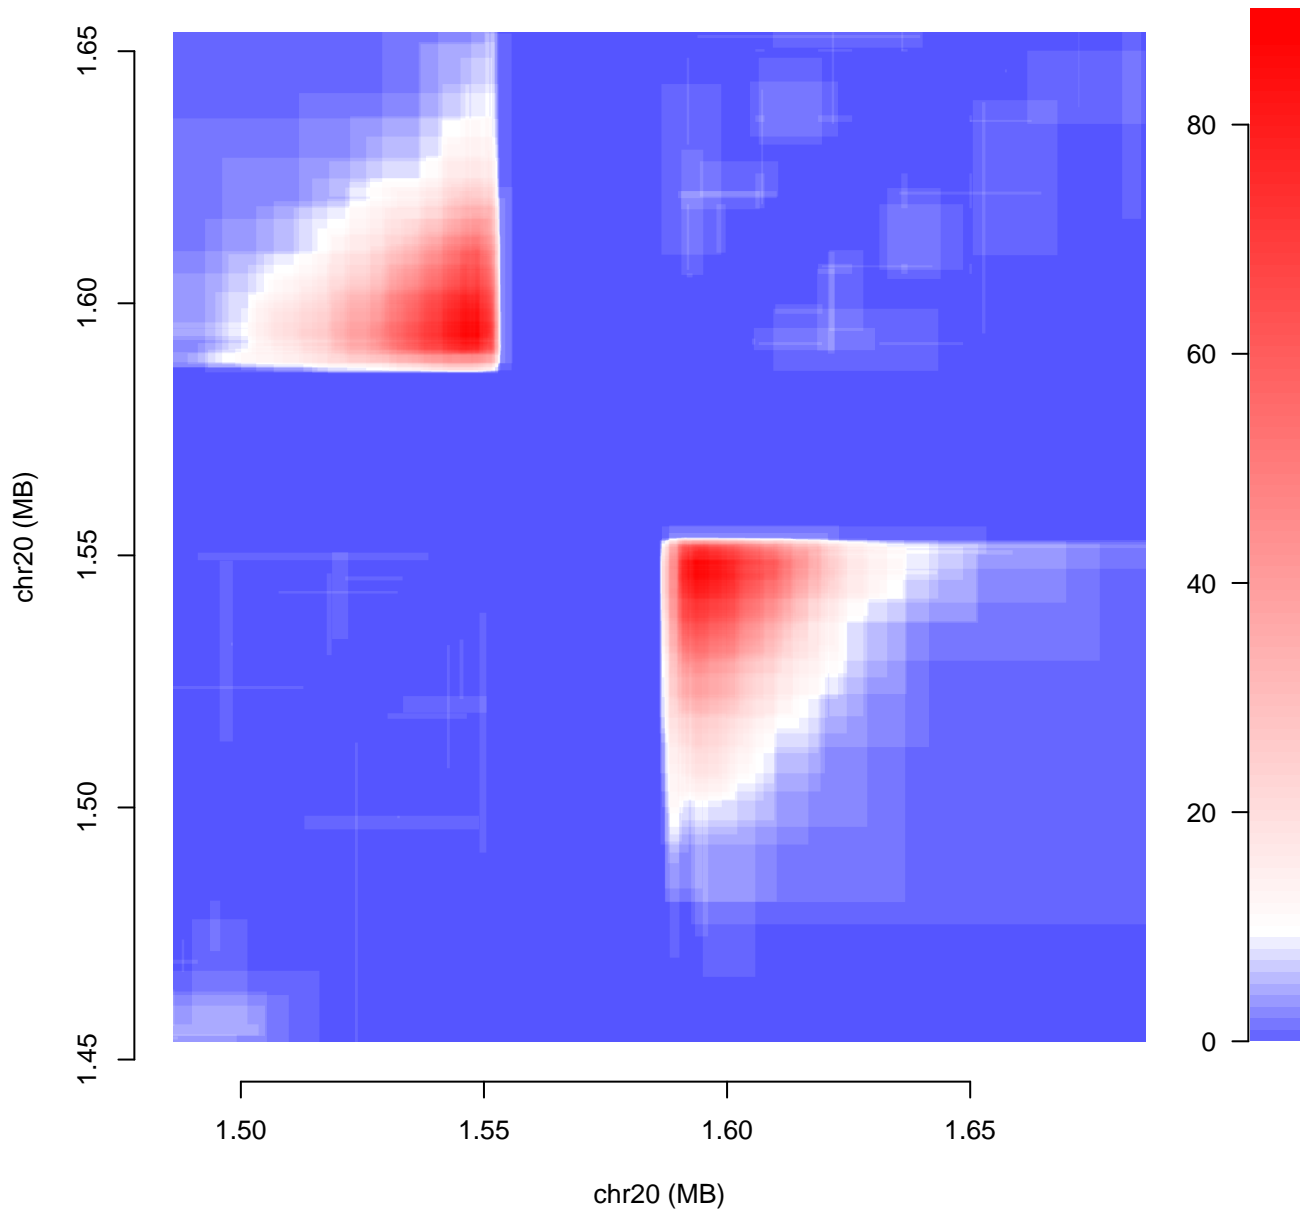

Supplement: Supplemental_Data.zip [file event_247.pdf › event_247.pdf]

Barcode

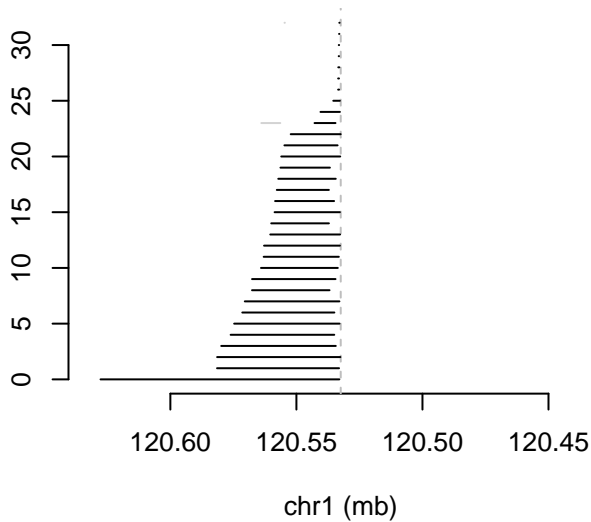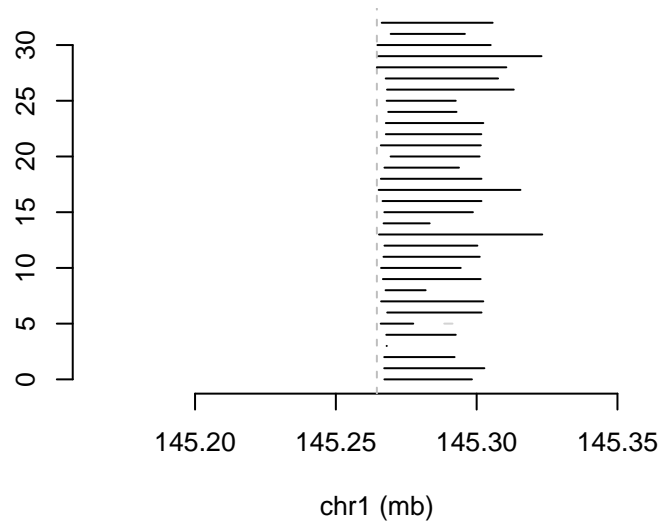

Copy number

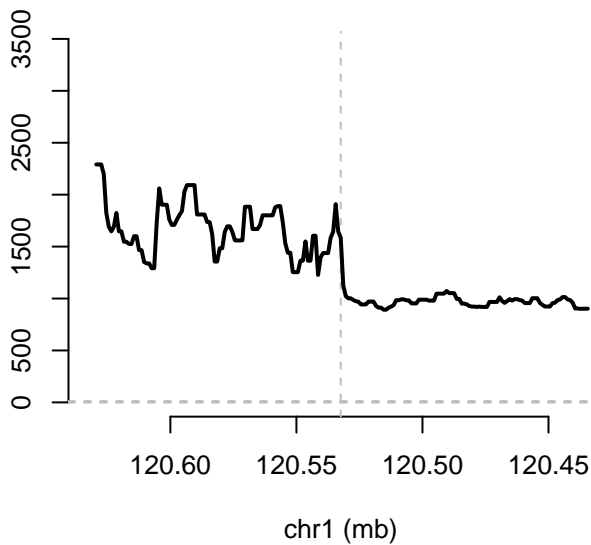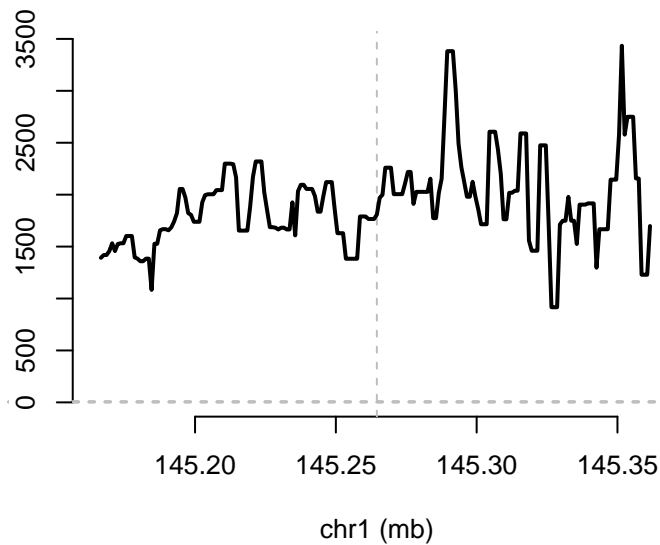

K562 chr1:120,532,415::chr1:145,264,569--

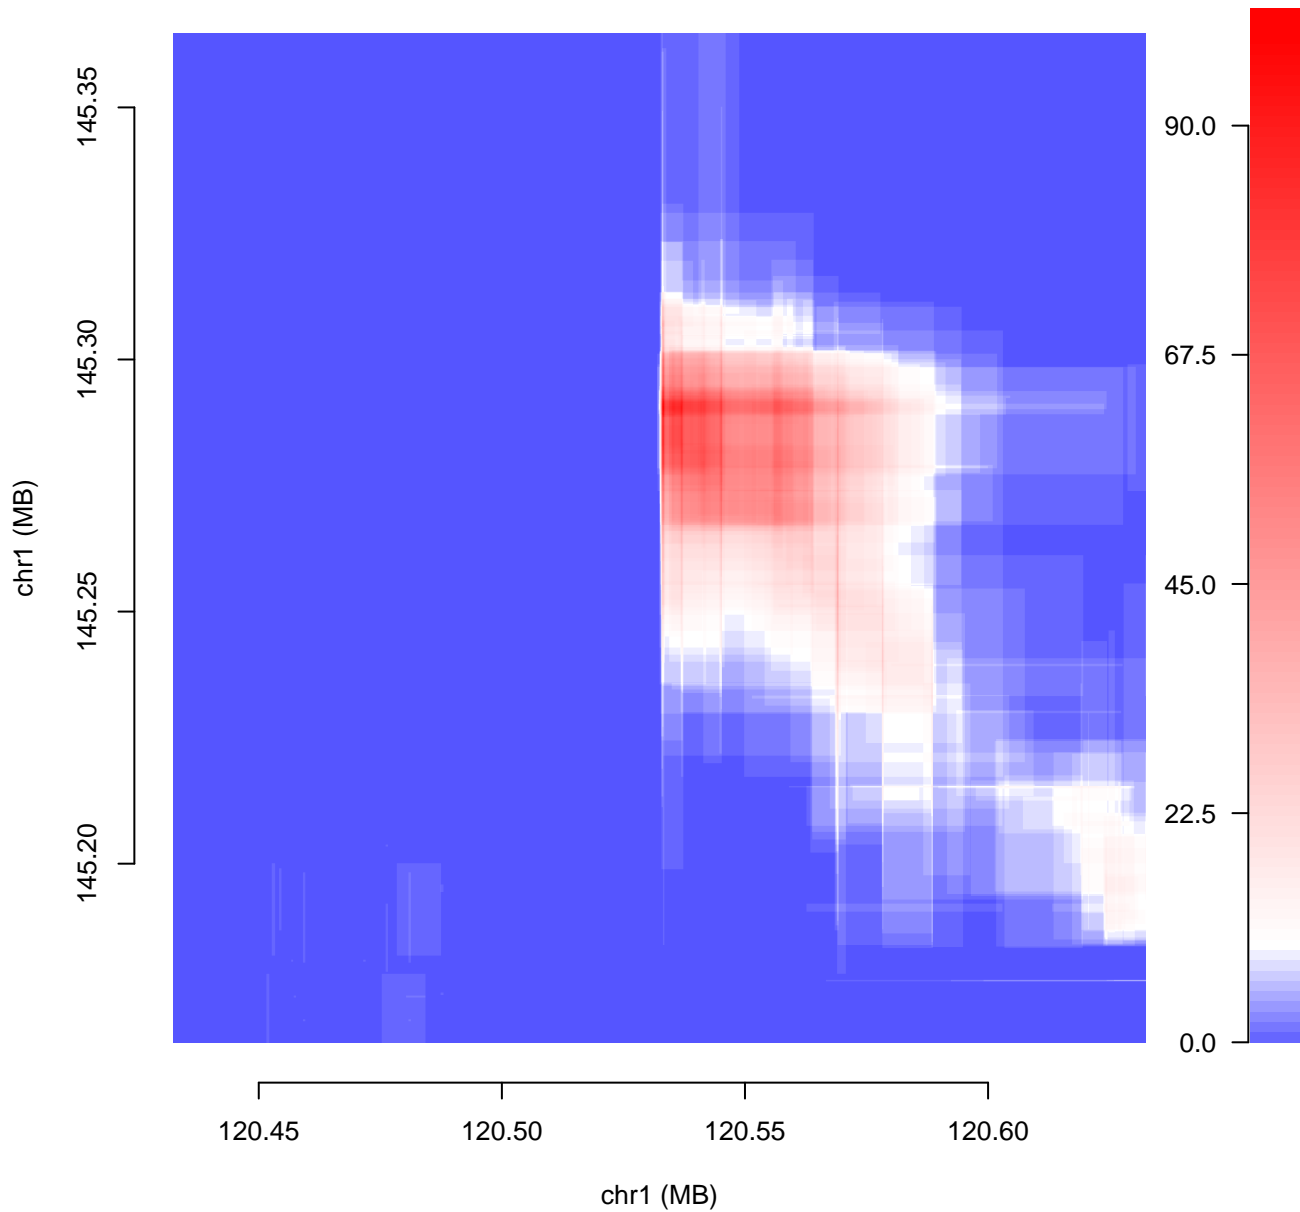

Supplement: Supplemental_Data.zip [file event_248.pdf › event_248.pdf]

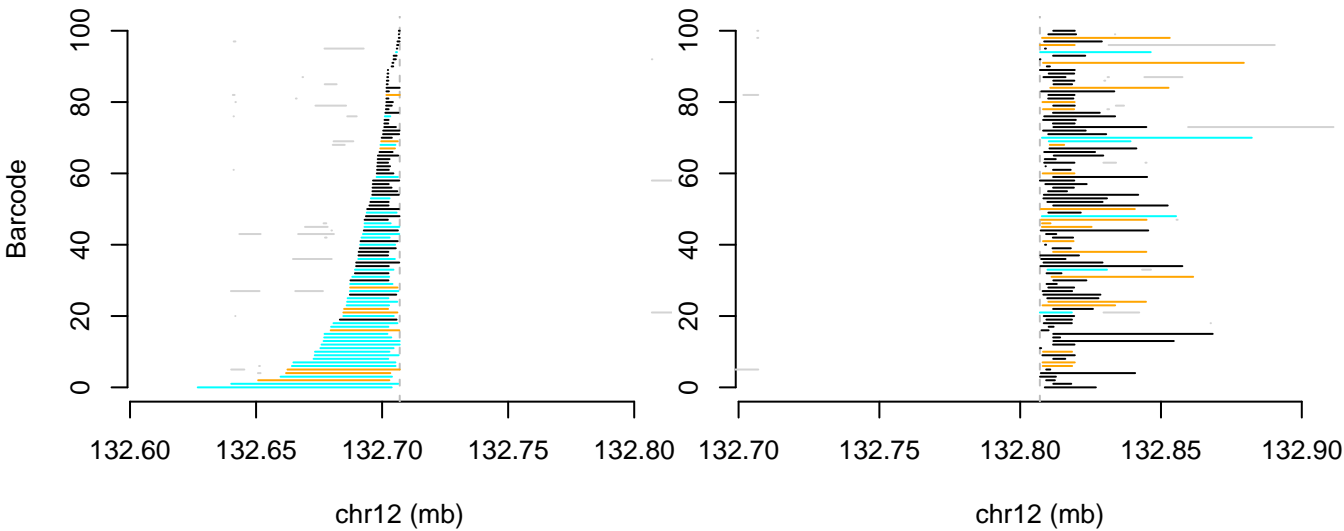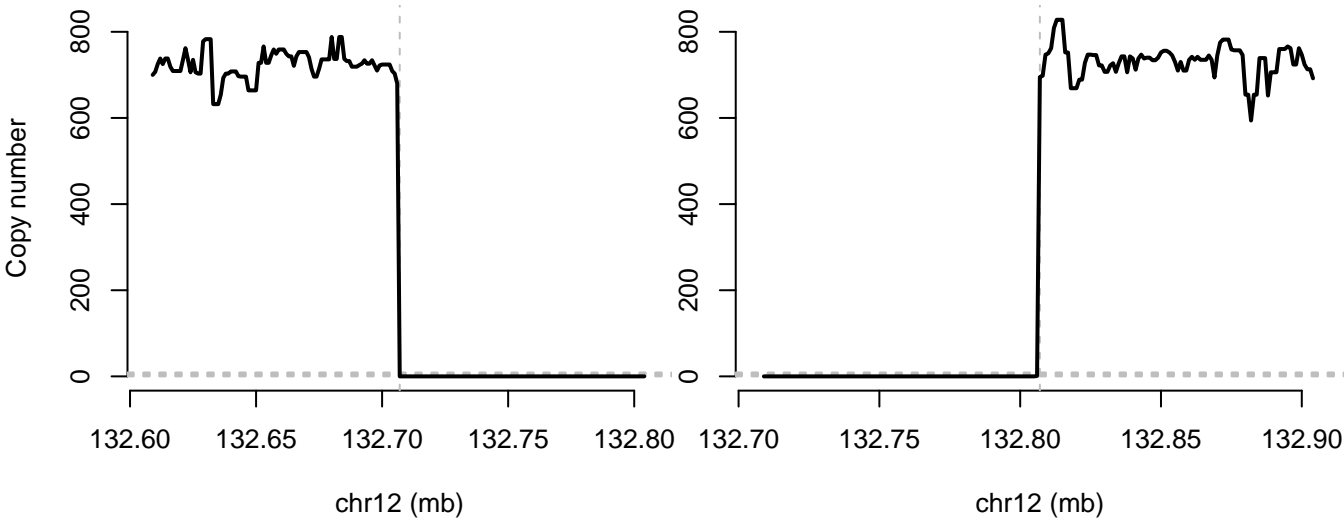

K562 chr12:132,706,992::chr12:132,806,991+-

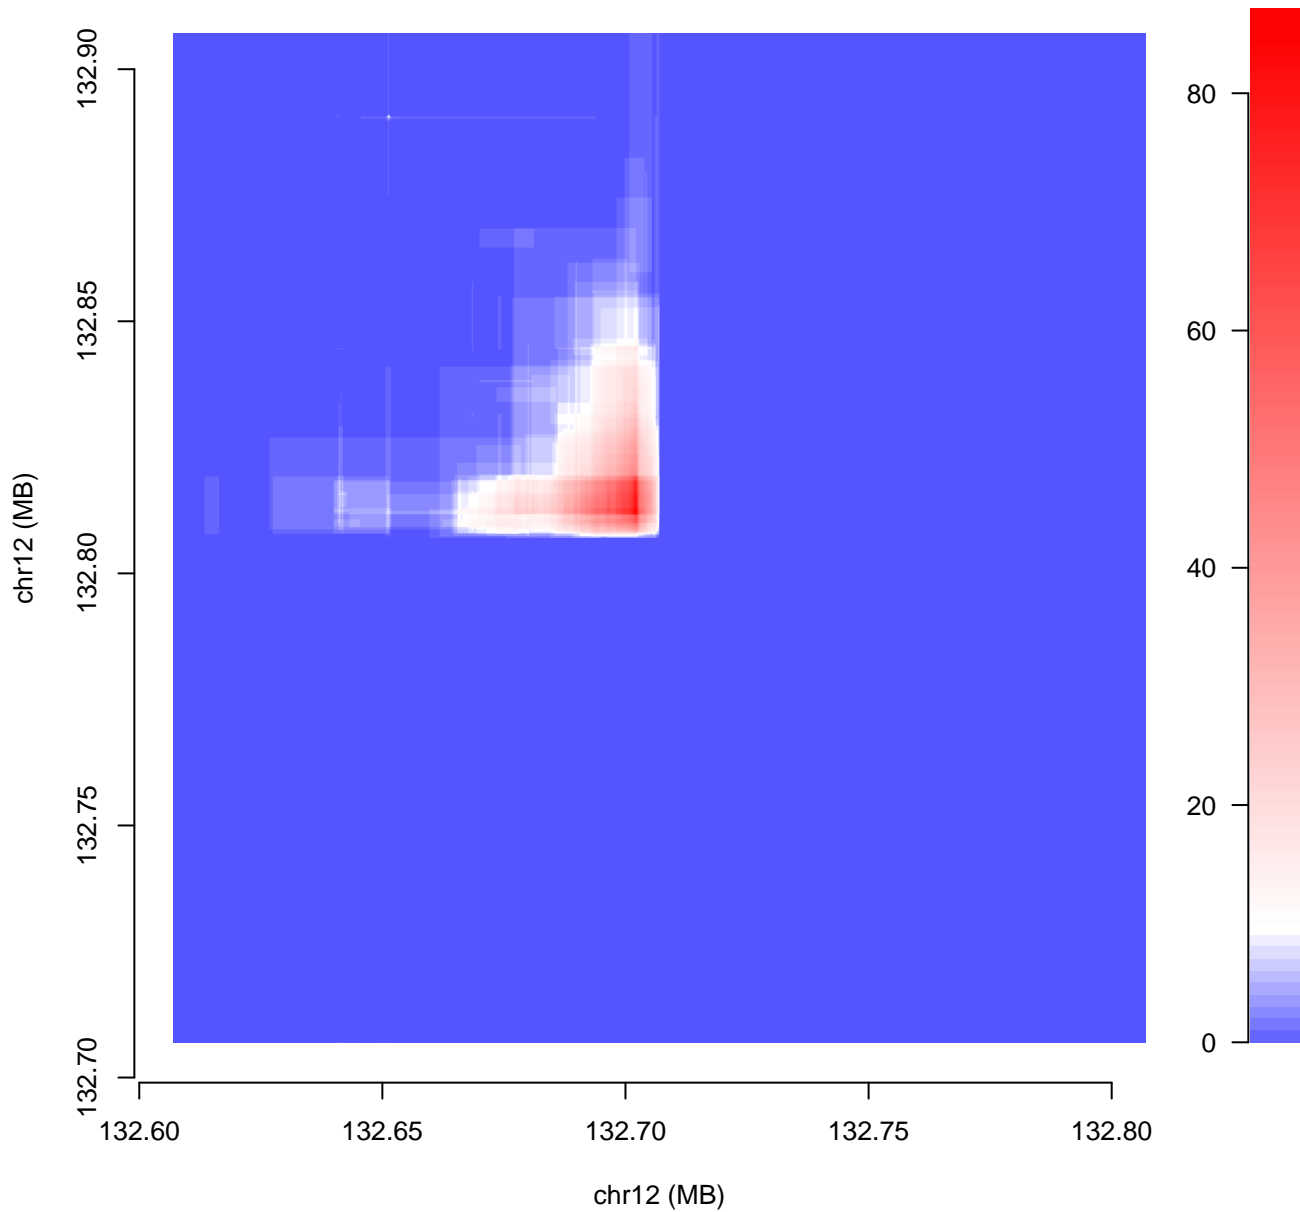

Supplement: Supplemental_Data.zip [file event_249.pdf › event_249.pdf]

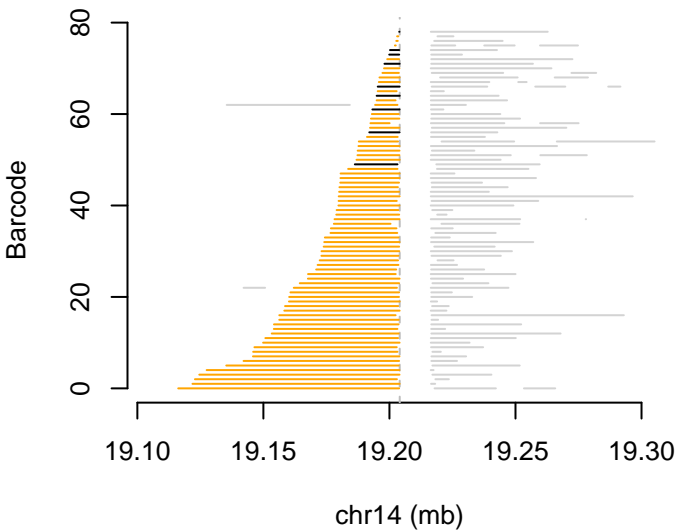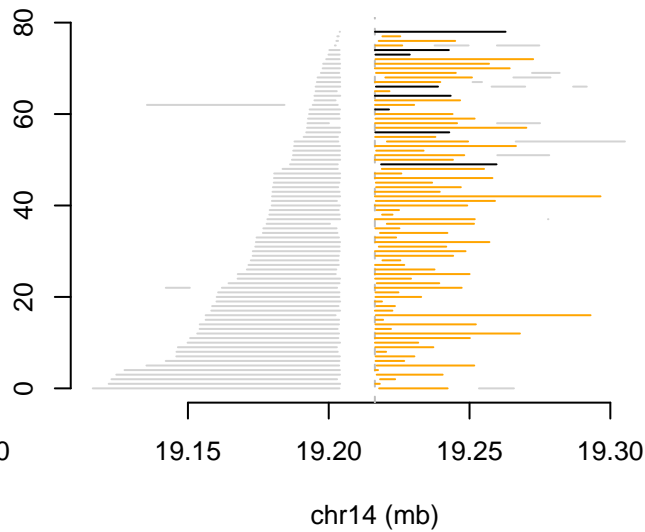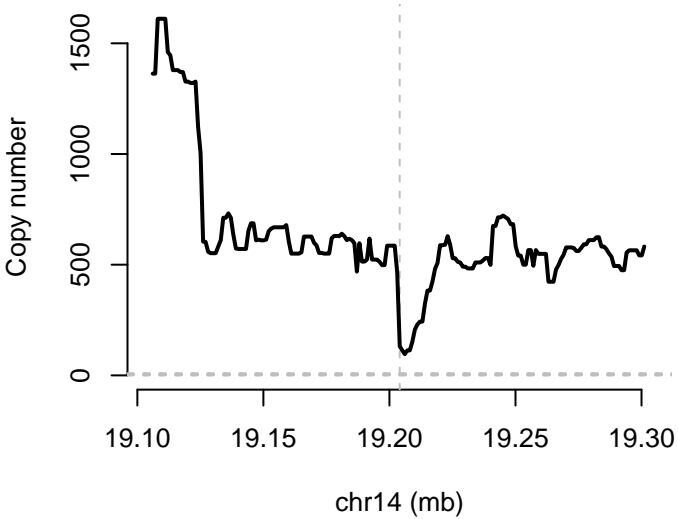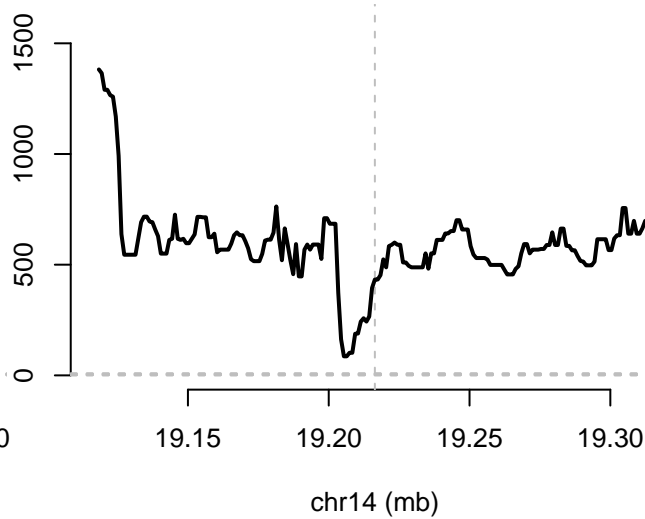

K562 chr14:19,216,387::chr14:19,204,089-+

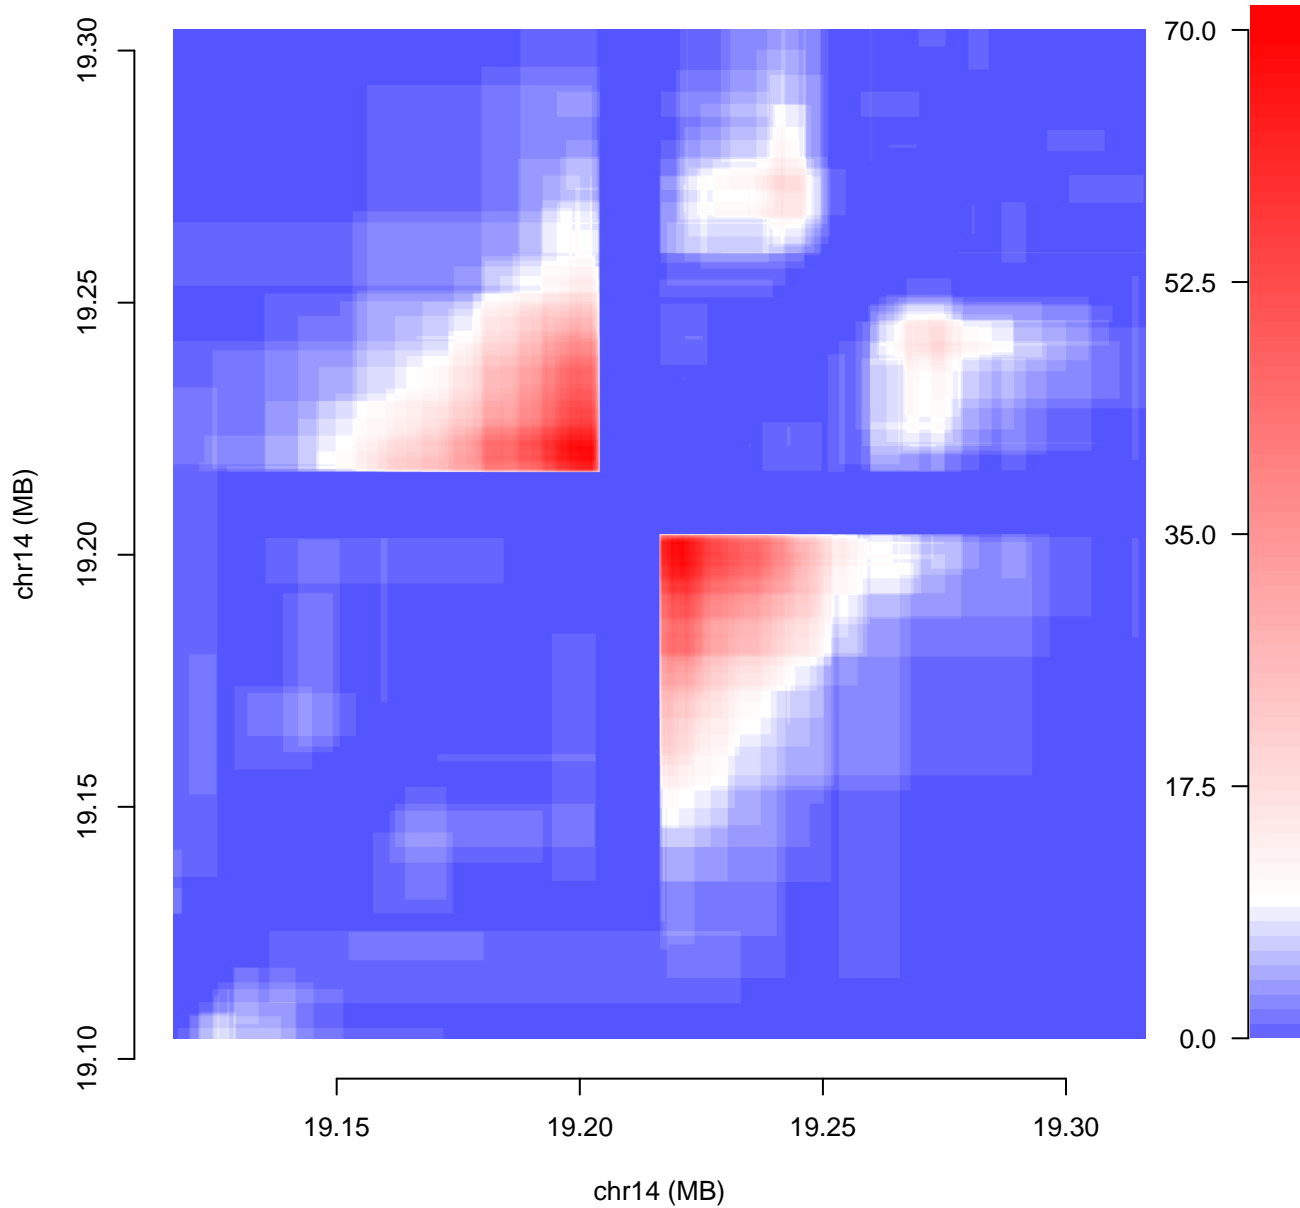

Supplement: Supplemental_Data.zip [file event_25.pdf › event_25.pdf]

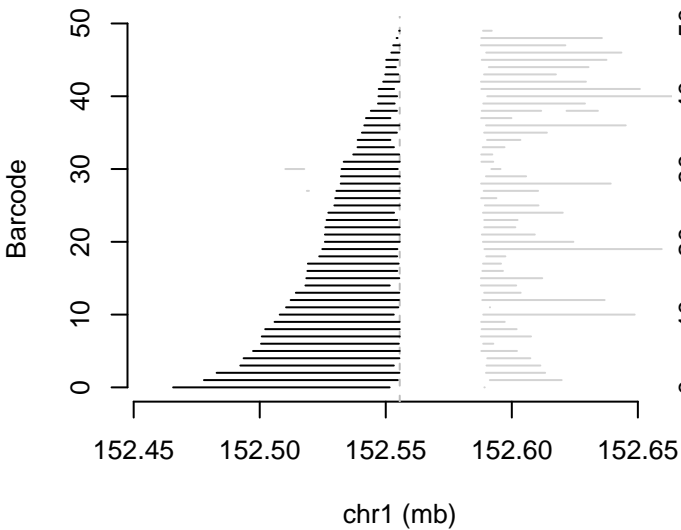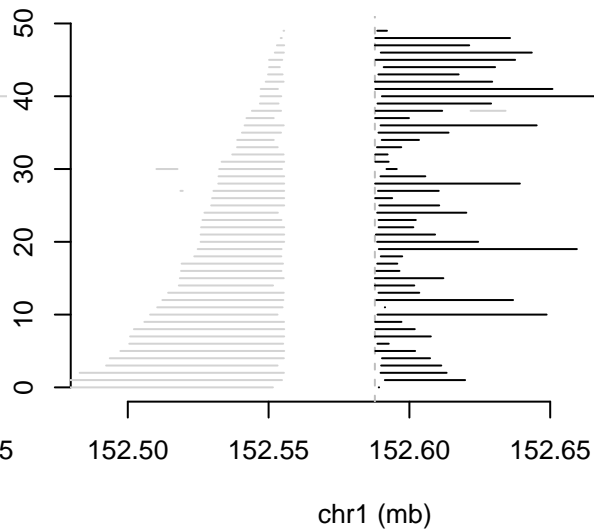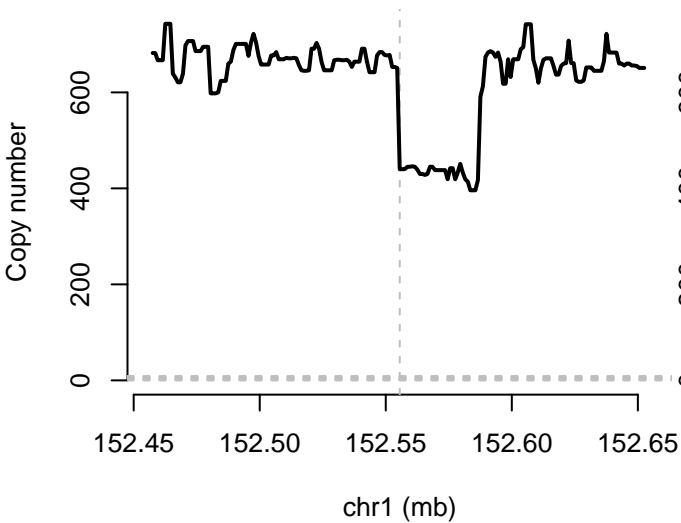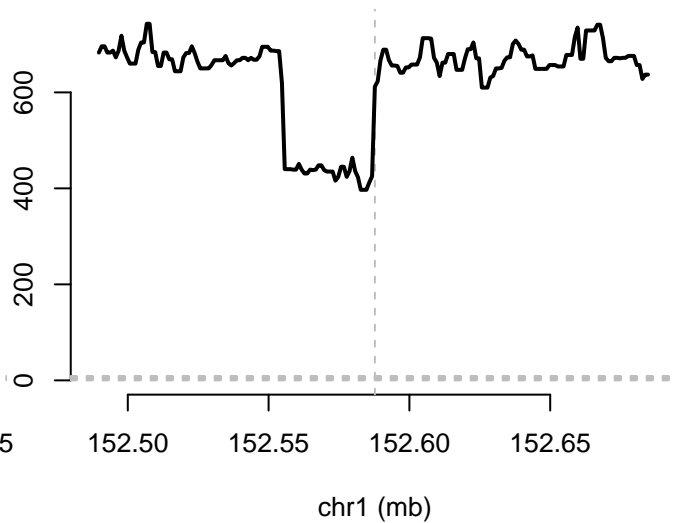

K562 chr1:152,587,740::chr1:152,555,542-+

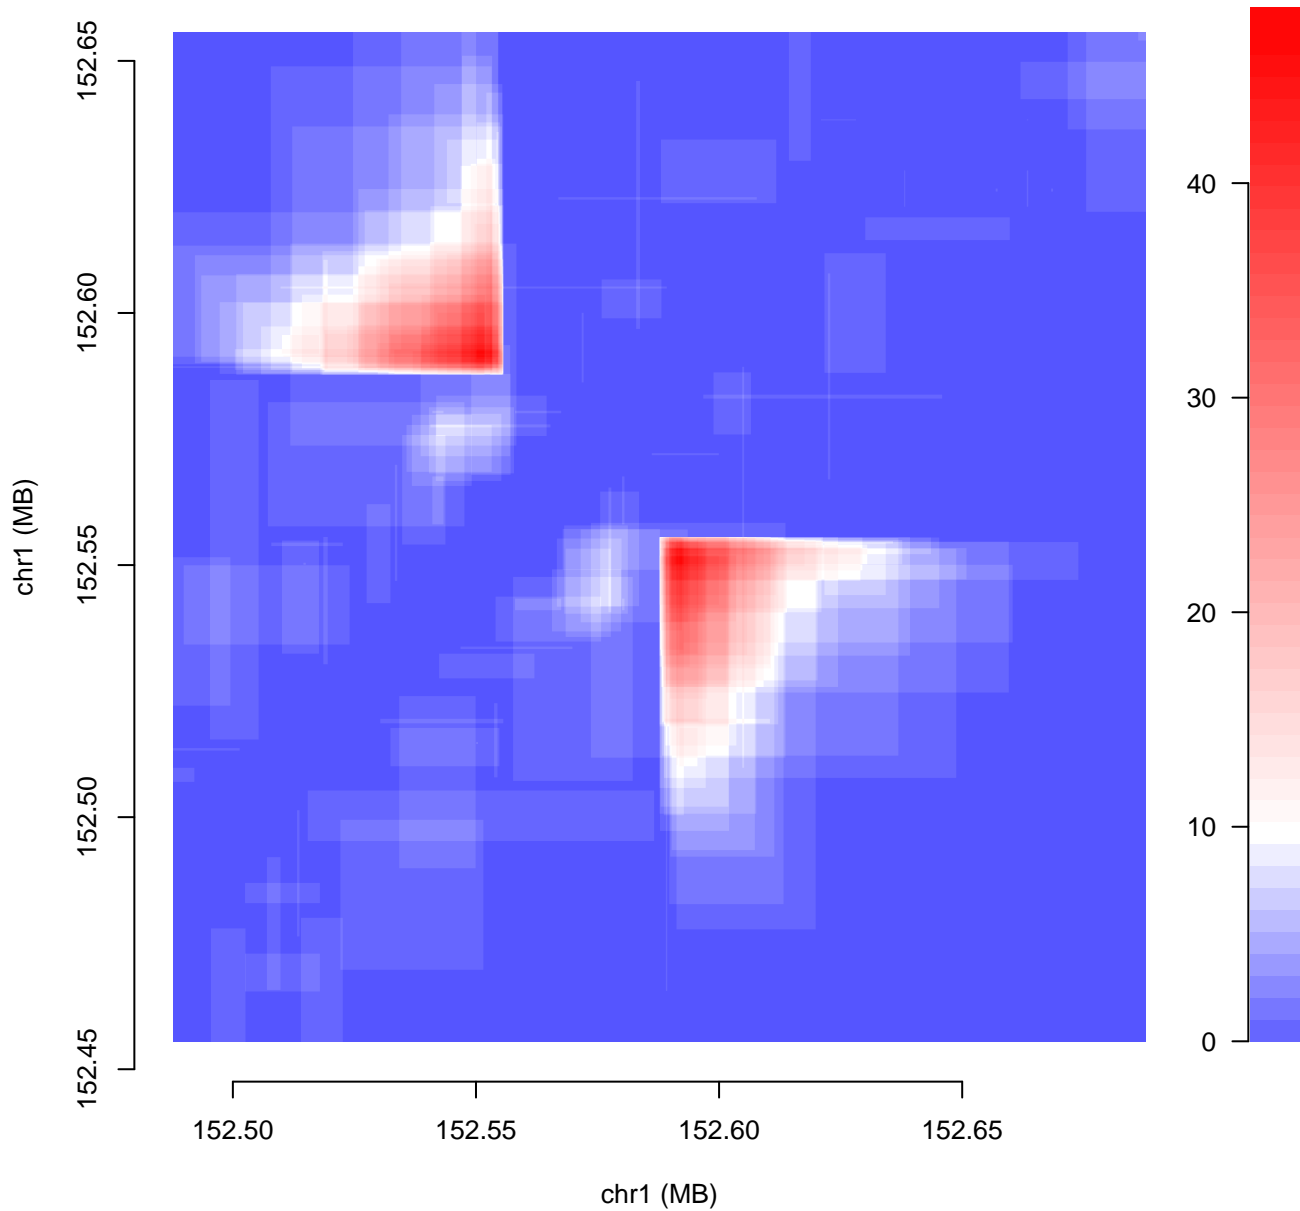

Supplement: Supplemental_Data.zip [file event_250.pdf › event_250.pdf]

Barcode

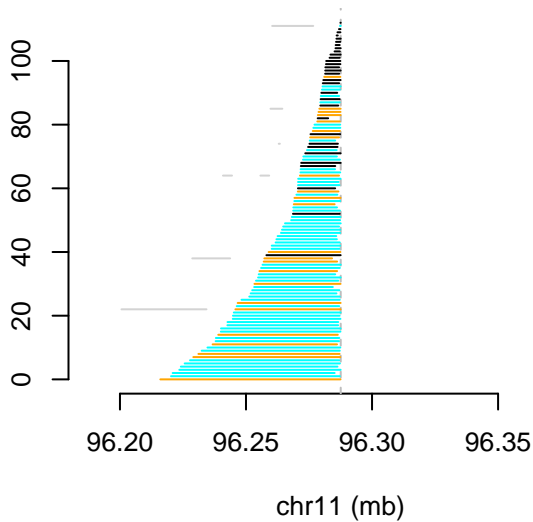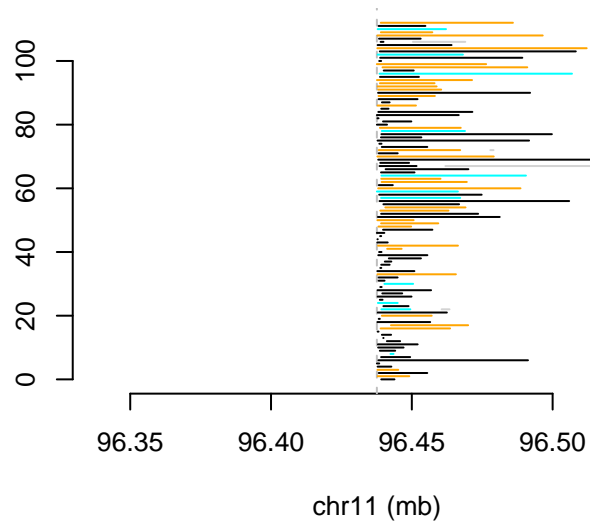

Copy number

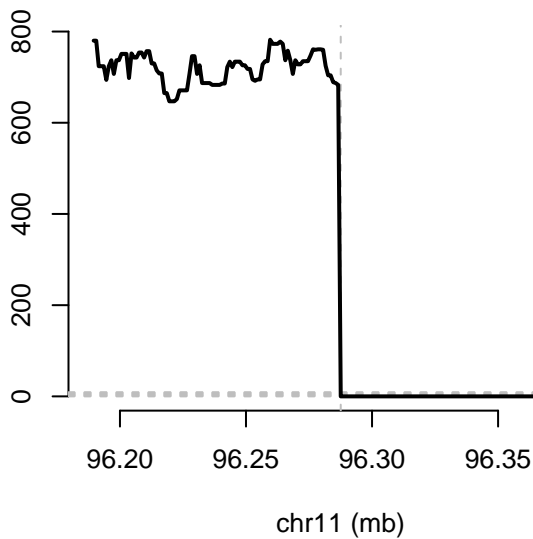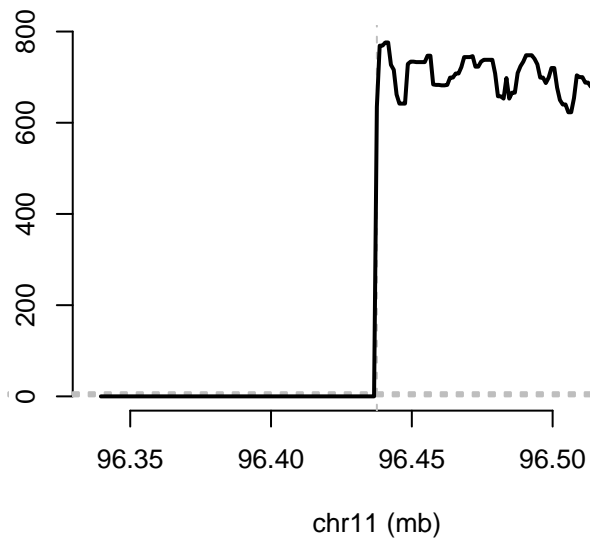

K562 chr11:96,287,584::chr11:96,437,583+-

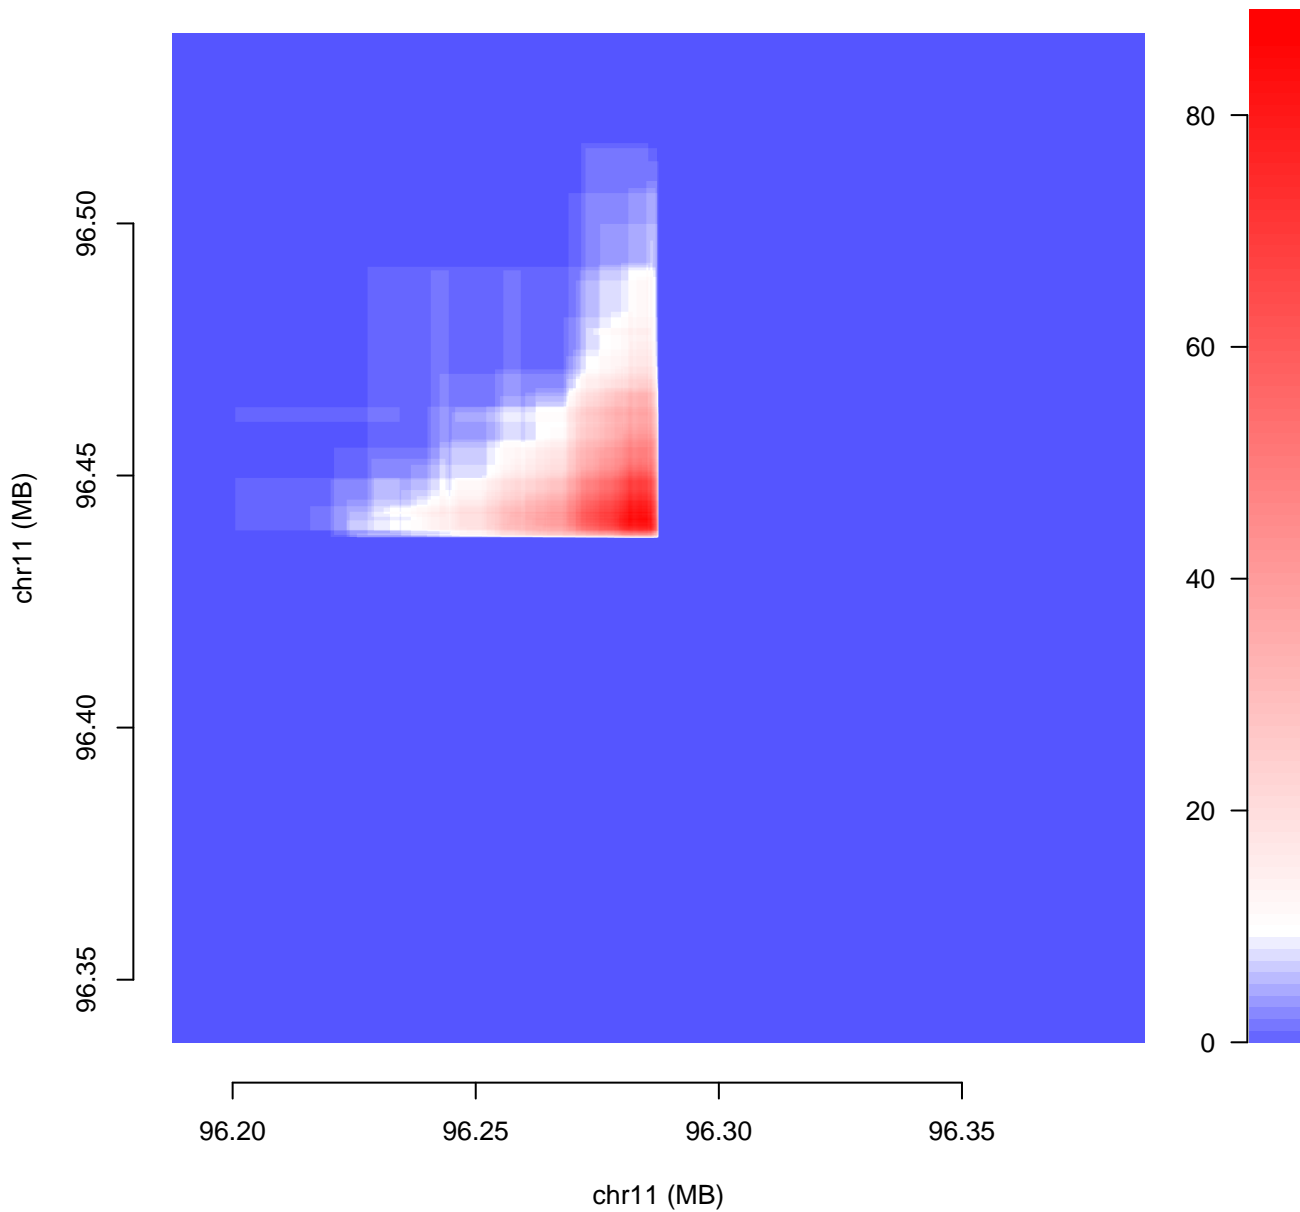

Supplement: Supplemental_Data.zip [file event_251.pdf › event_251.pdf]

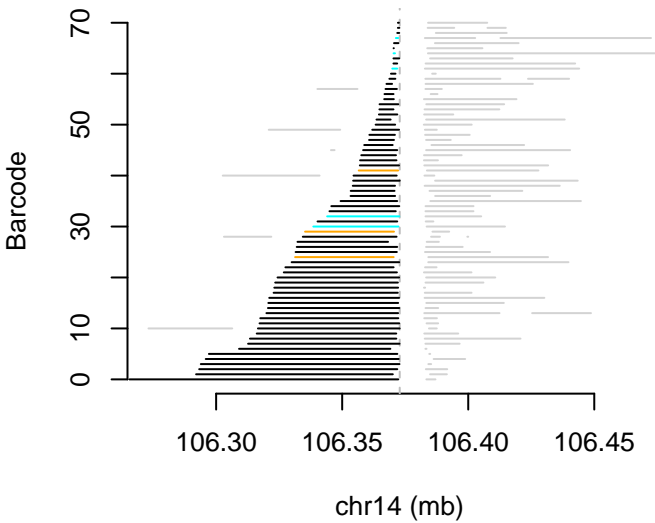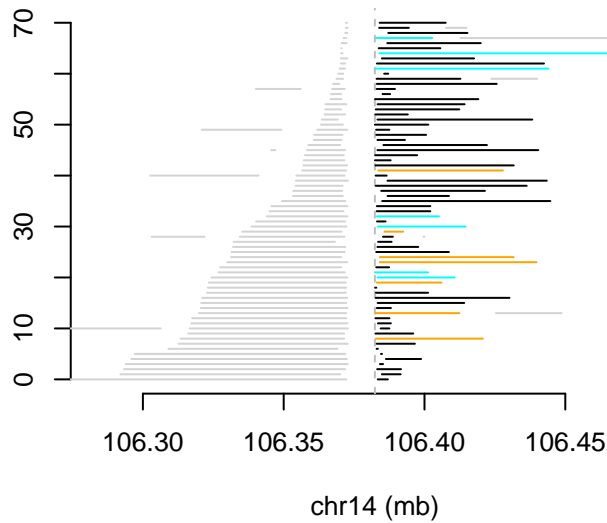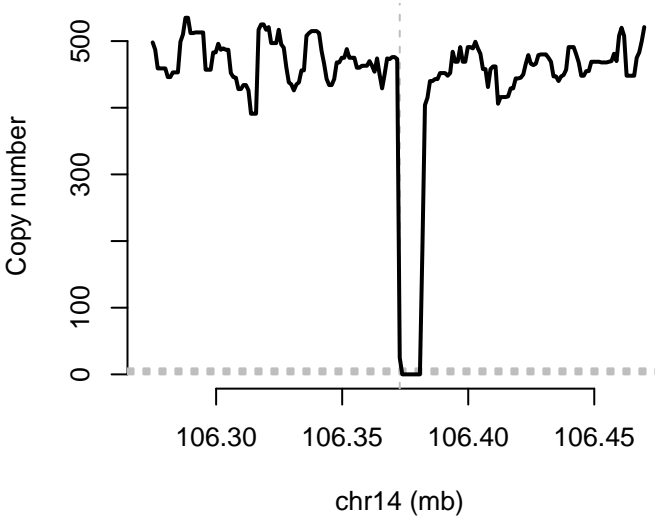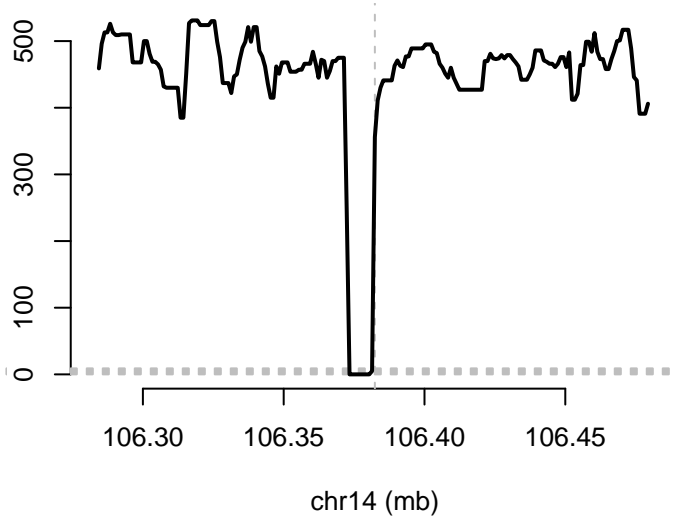

K562 chr14:106,372,831::chr14:106,382,381+-

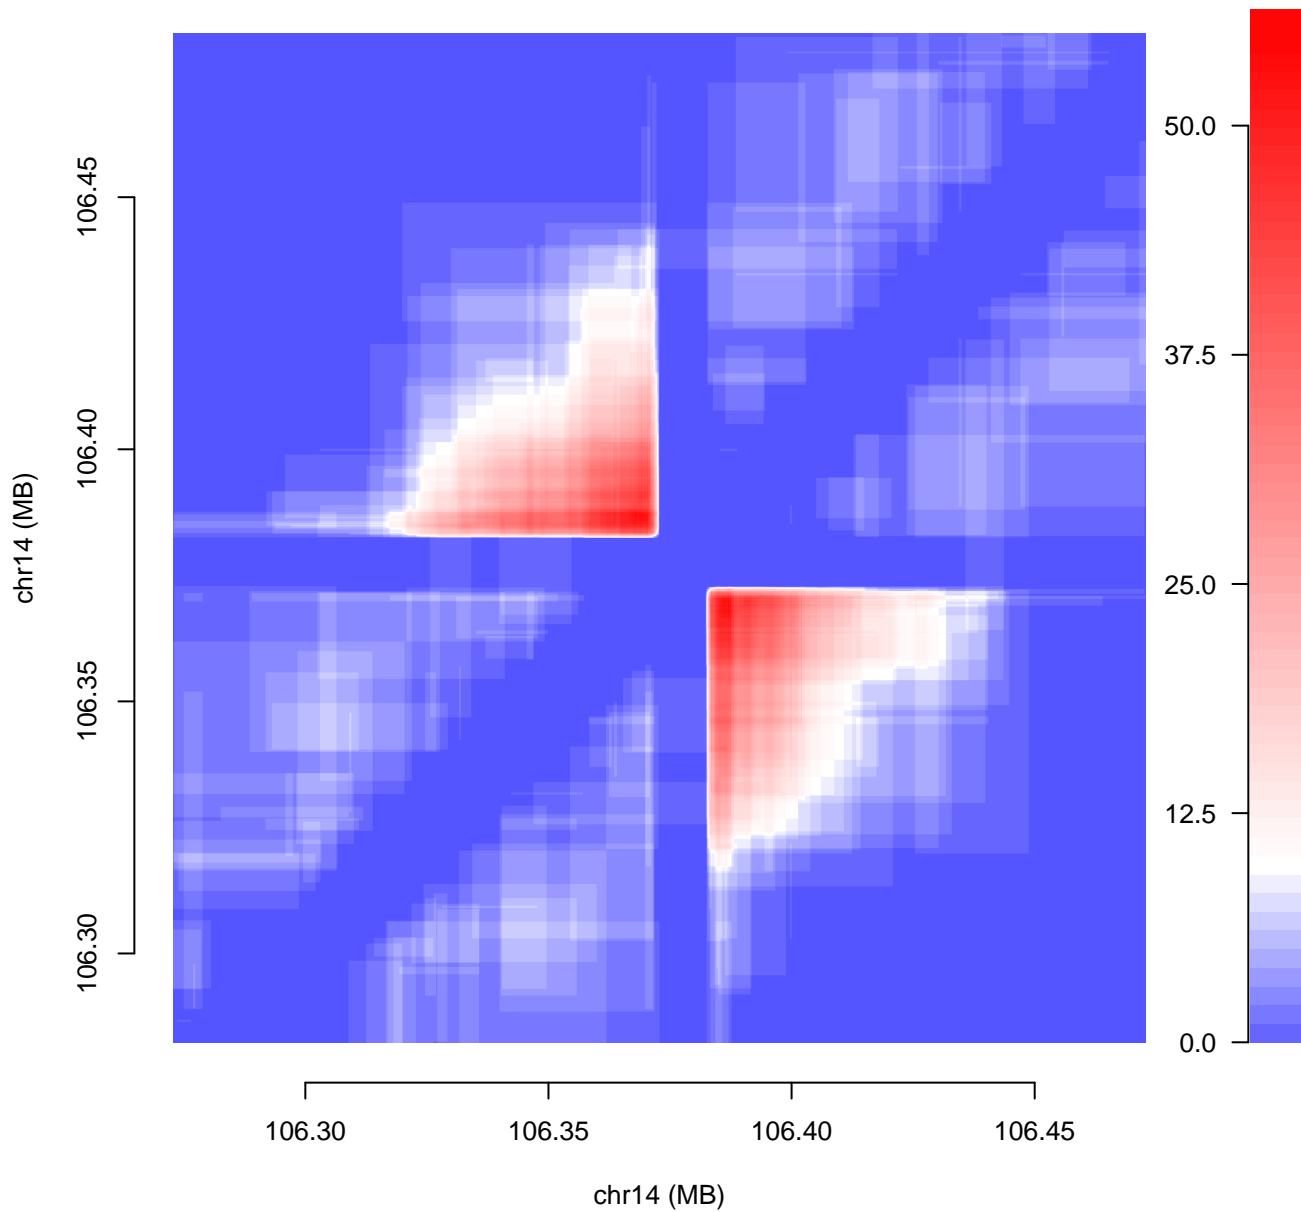

Supplement: Supplemental_Data.zip [file event_252.pdf › event_252.pdf]

Barcode

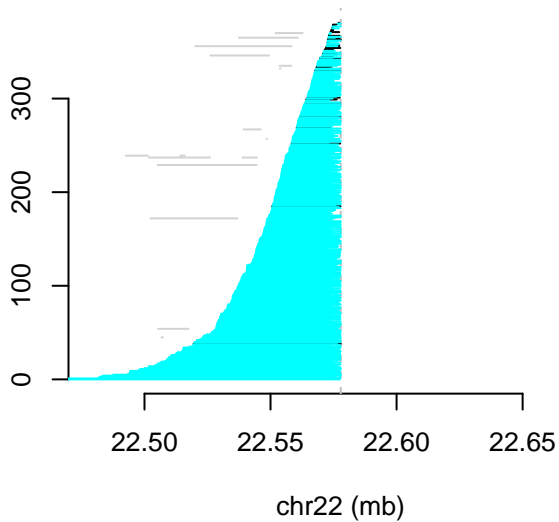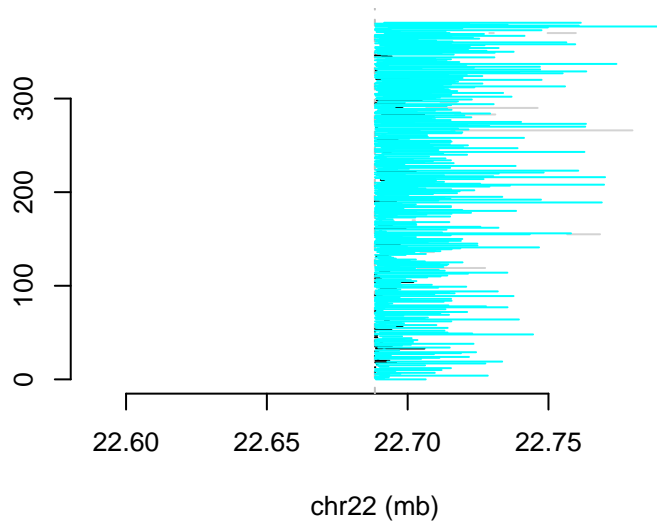

Copy number

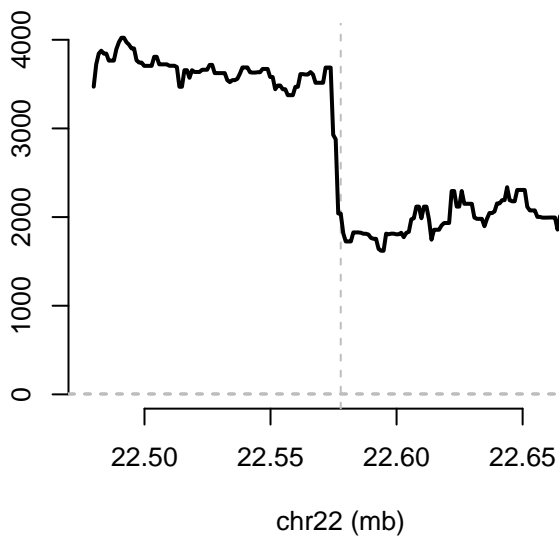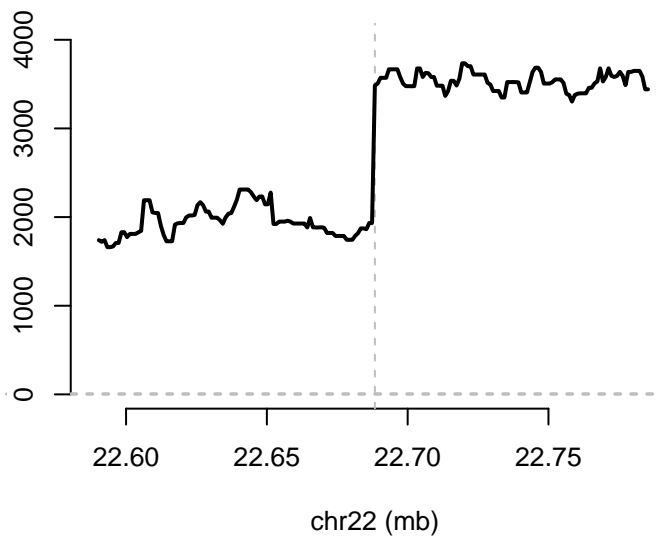

K562 chr22:22,688,352::chr22:22,577,852-+

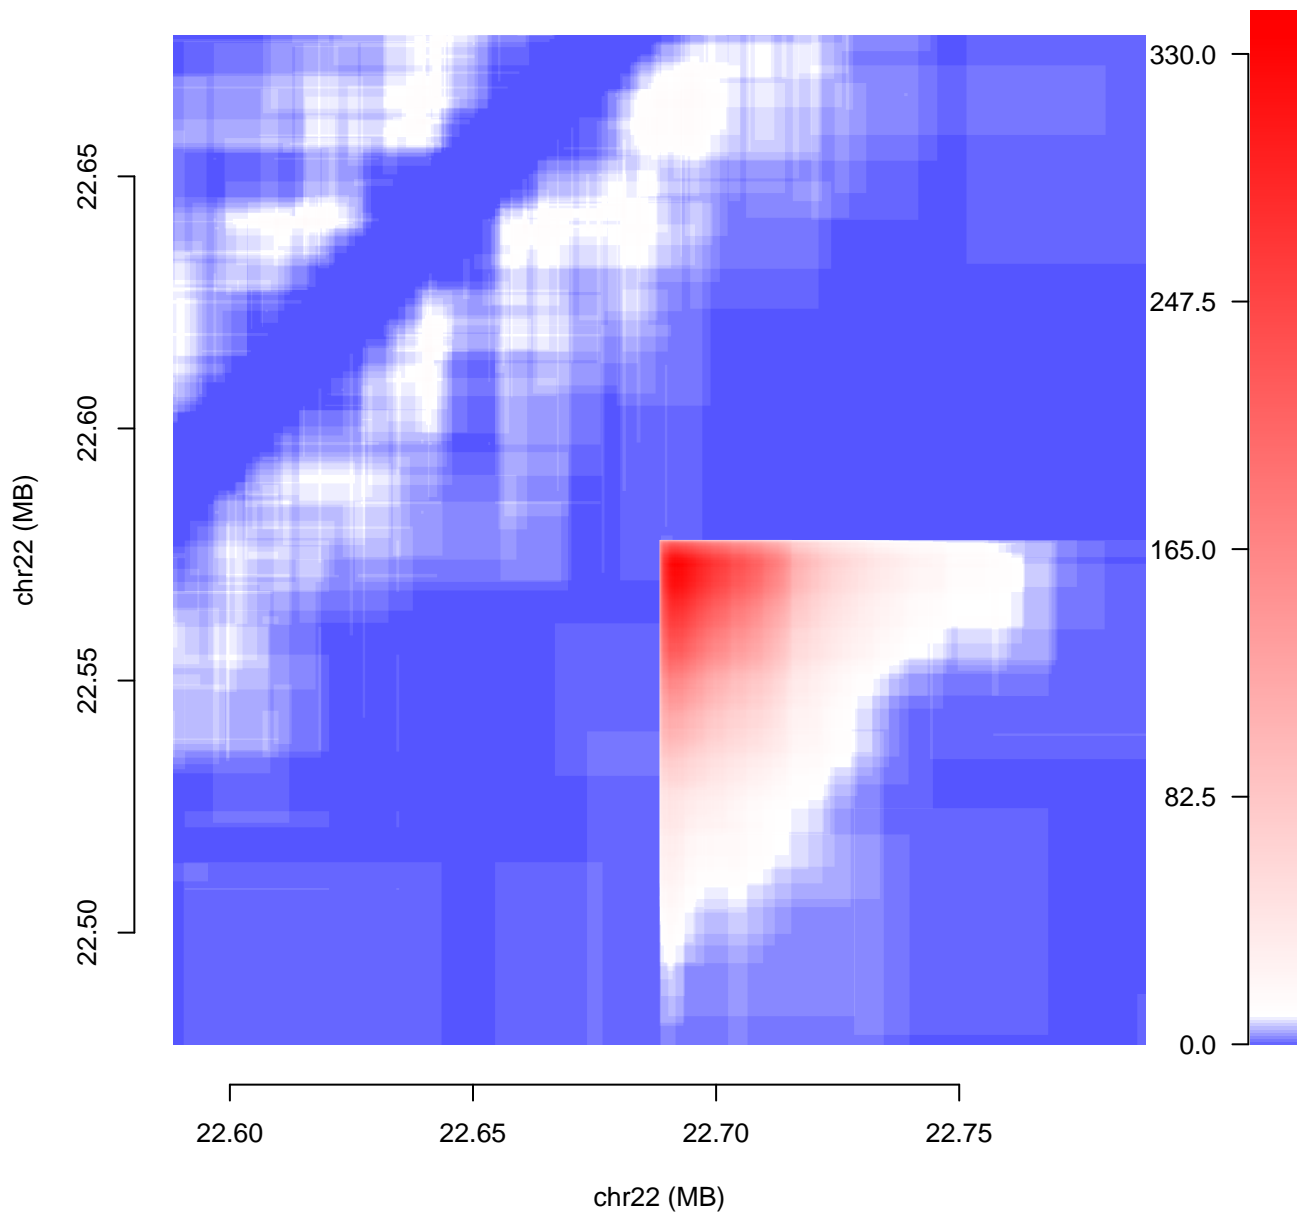

Supplement: Supplemental_Data.zip [file event_253.pdf › event_253.pdf]

Barcode

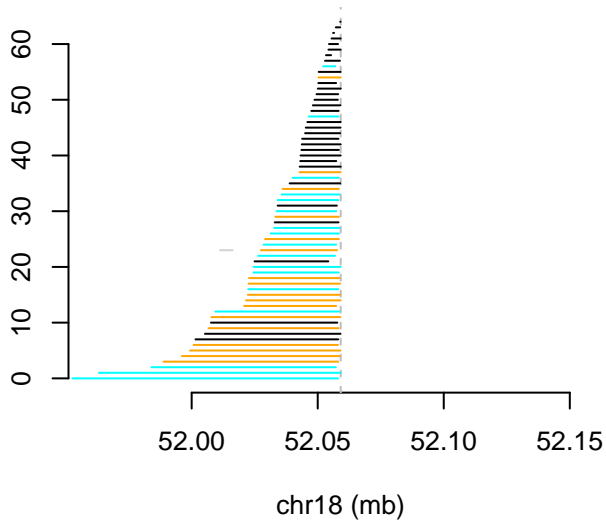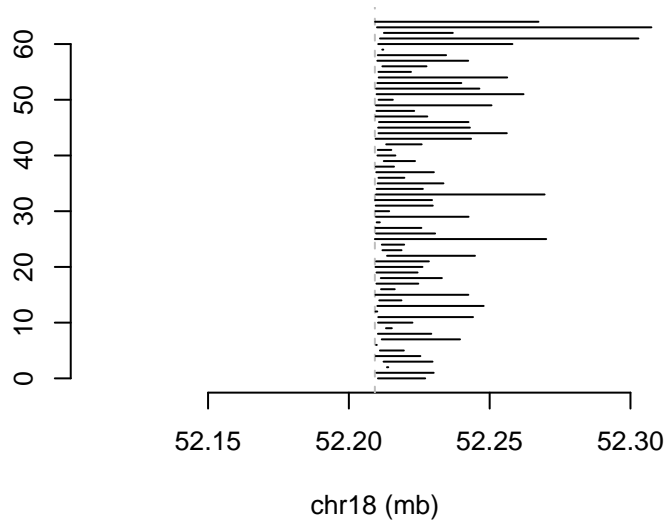

Copy number

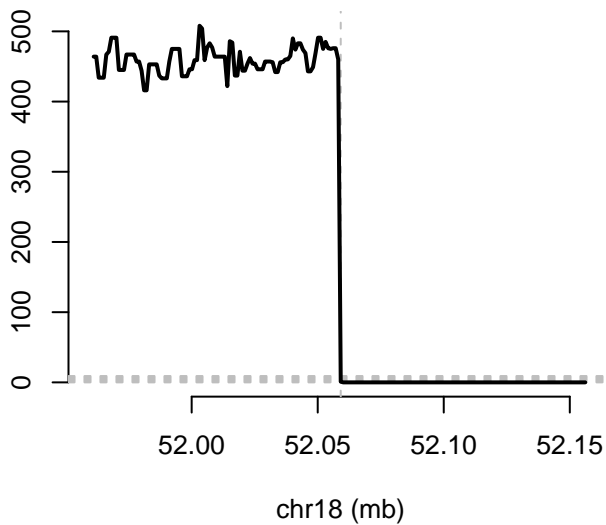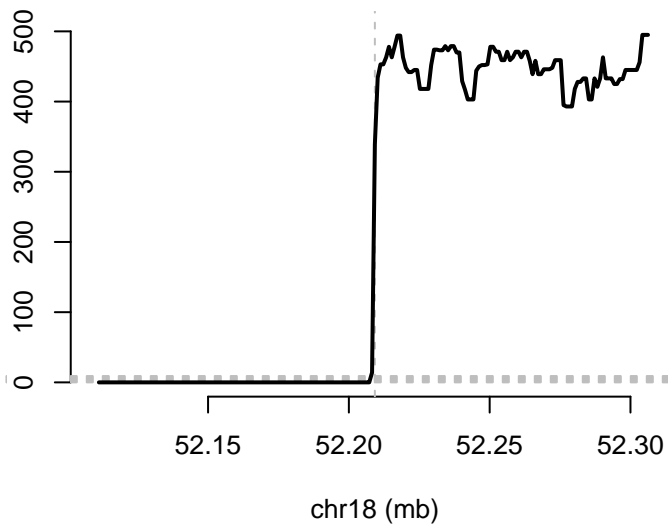

K562 chr18:52,059,136::chr18:52,209,232+-

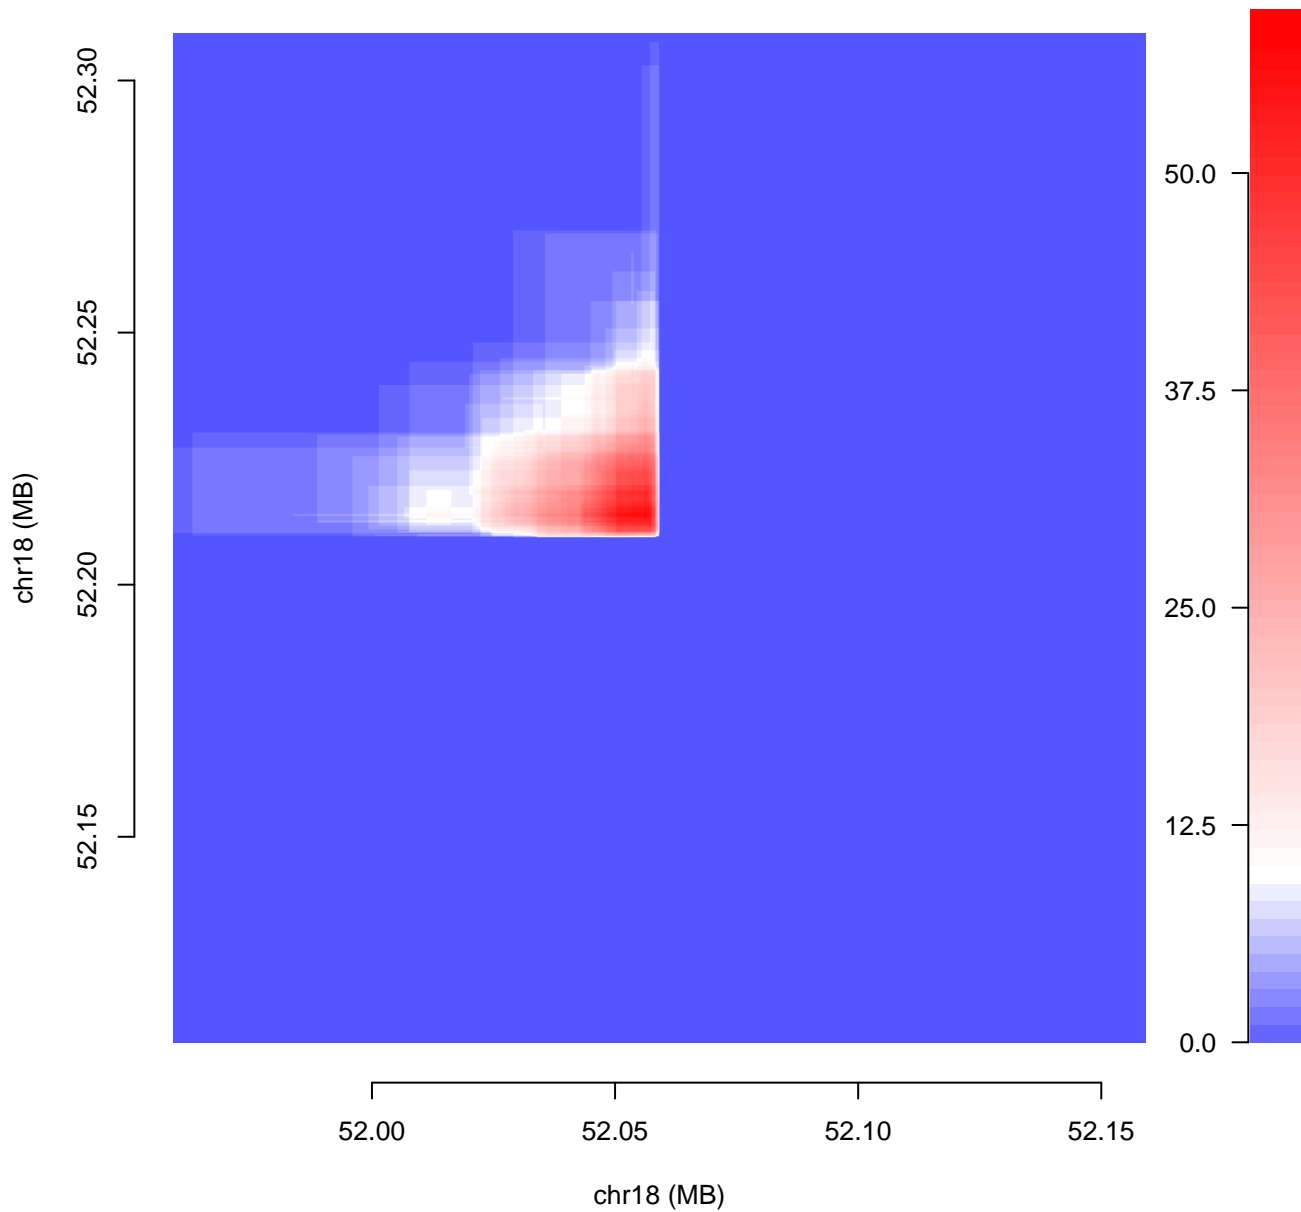

Supplement: Supplemental_Data.zip [file event_254.pdf › event_254.pdf]

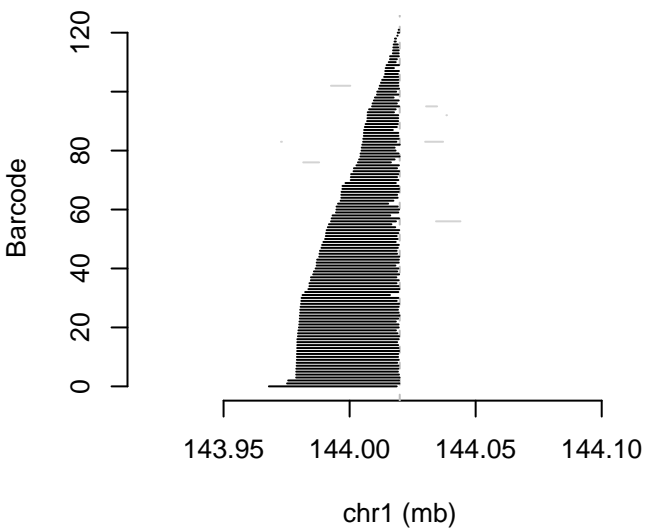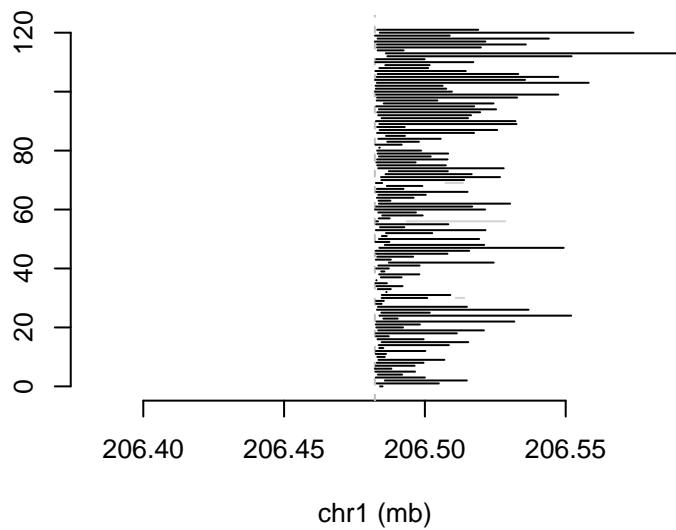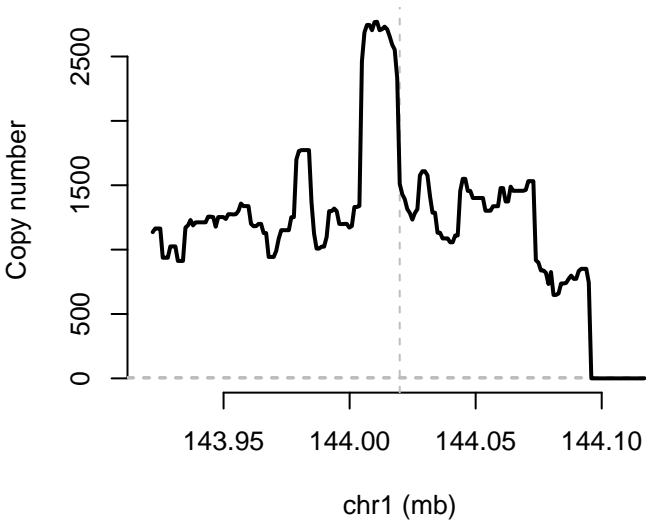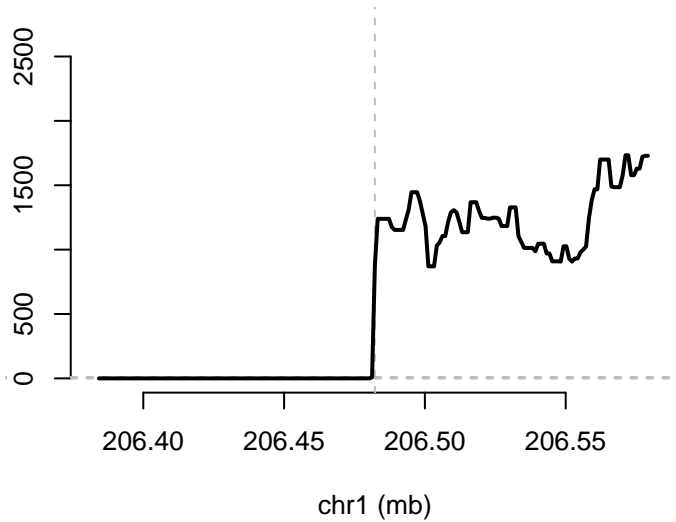

K562 chr1:144,019,886::chr1:206,482,240+-

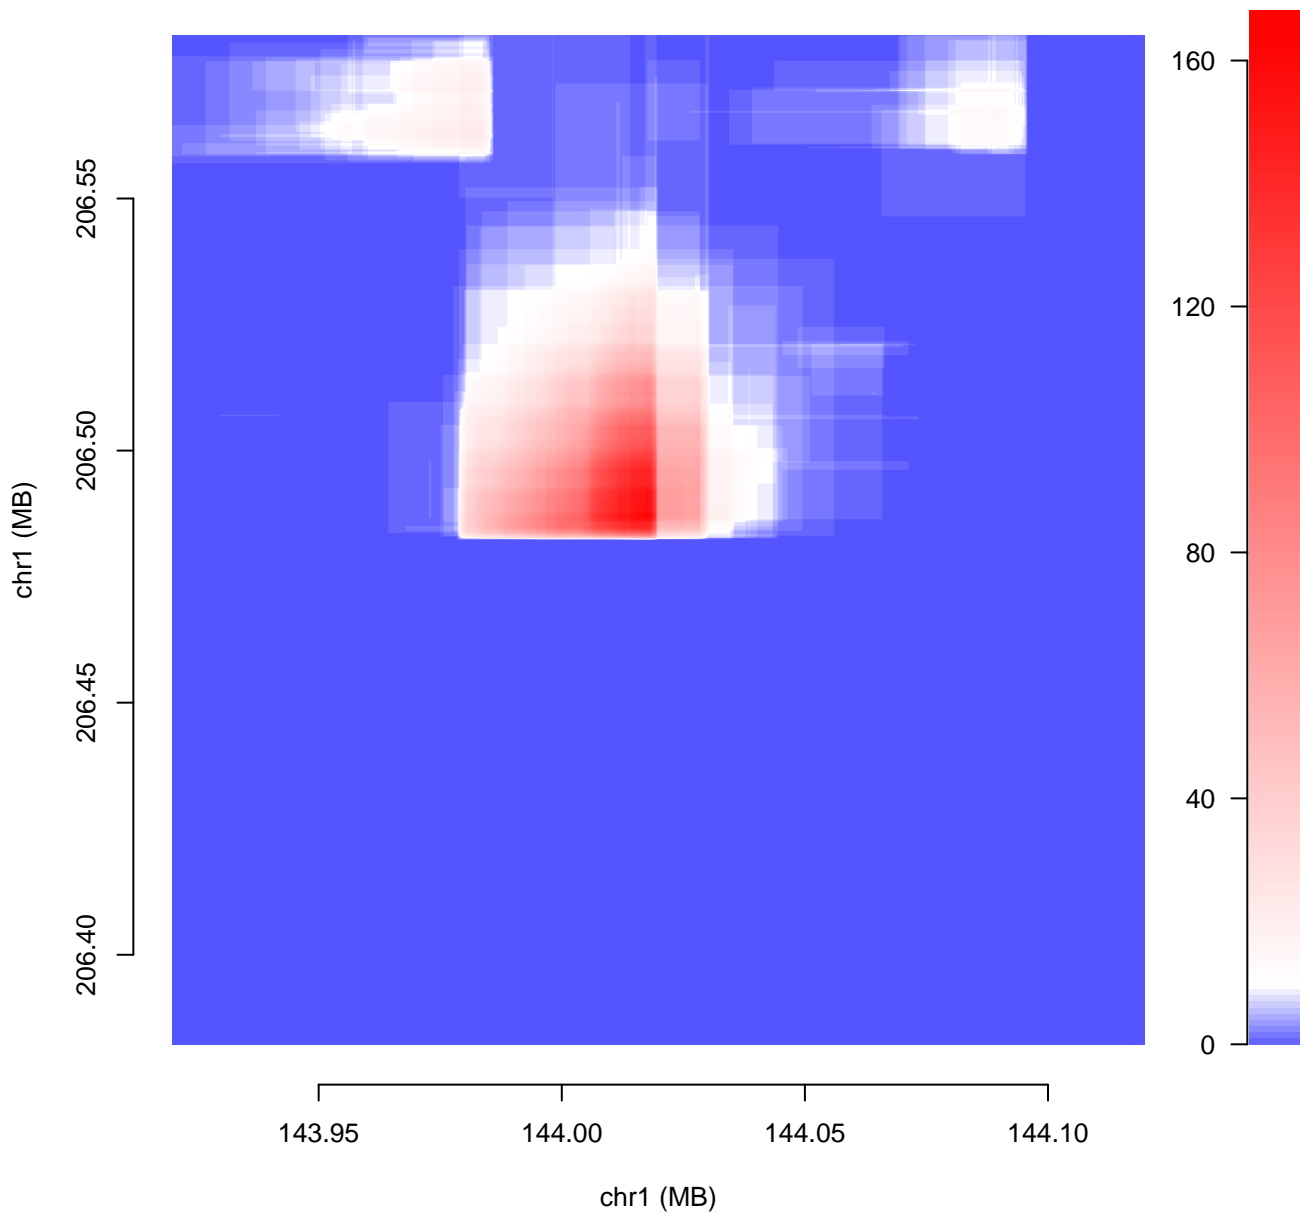

Supplement: Supplemental_Data.zip [file event_255.pdf › event_255.pdf]

Barcode

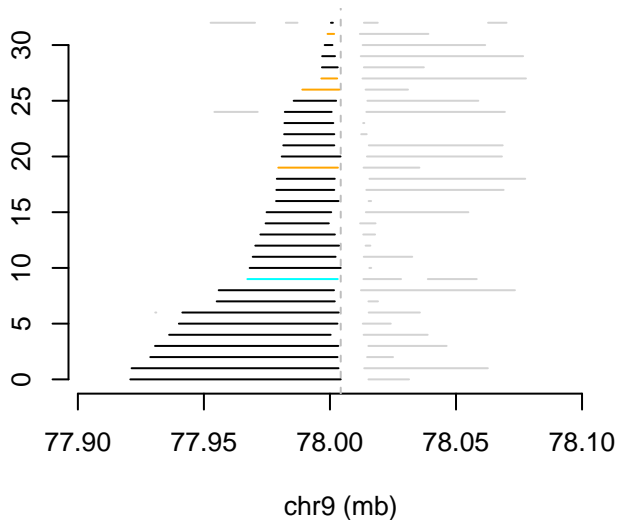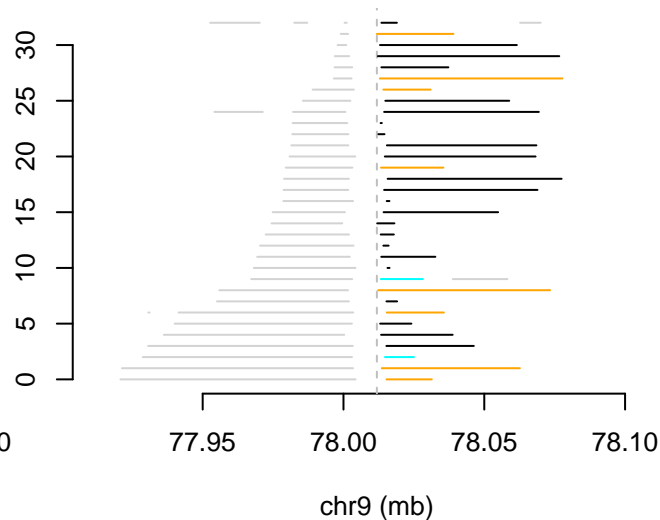

Copy number

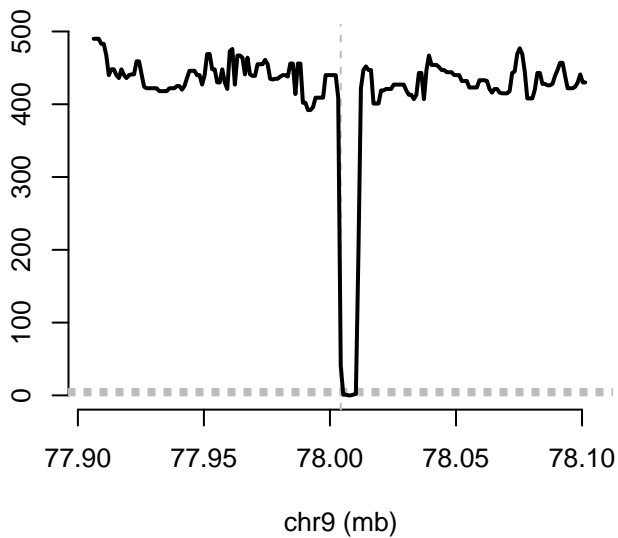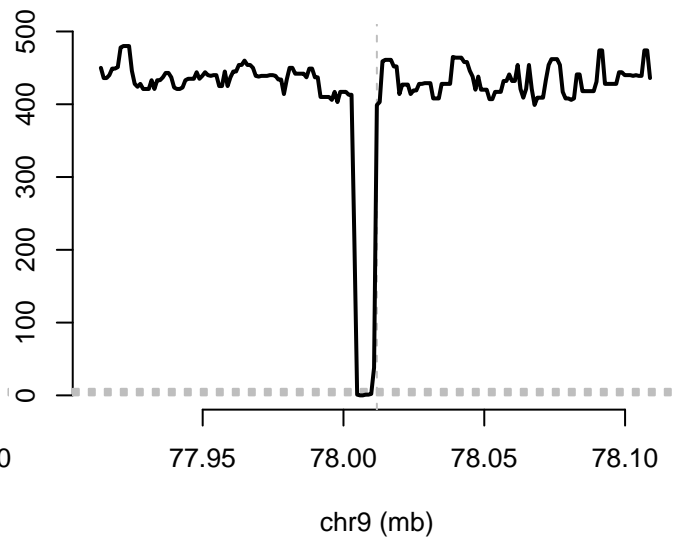

K562 chr9:78,004,279::chr9:78,011,858+-

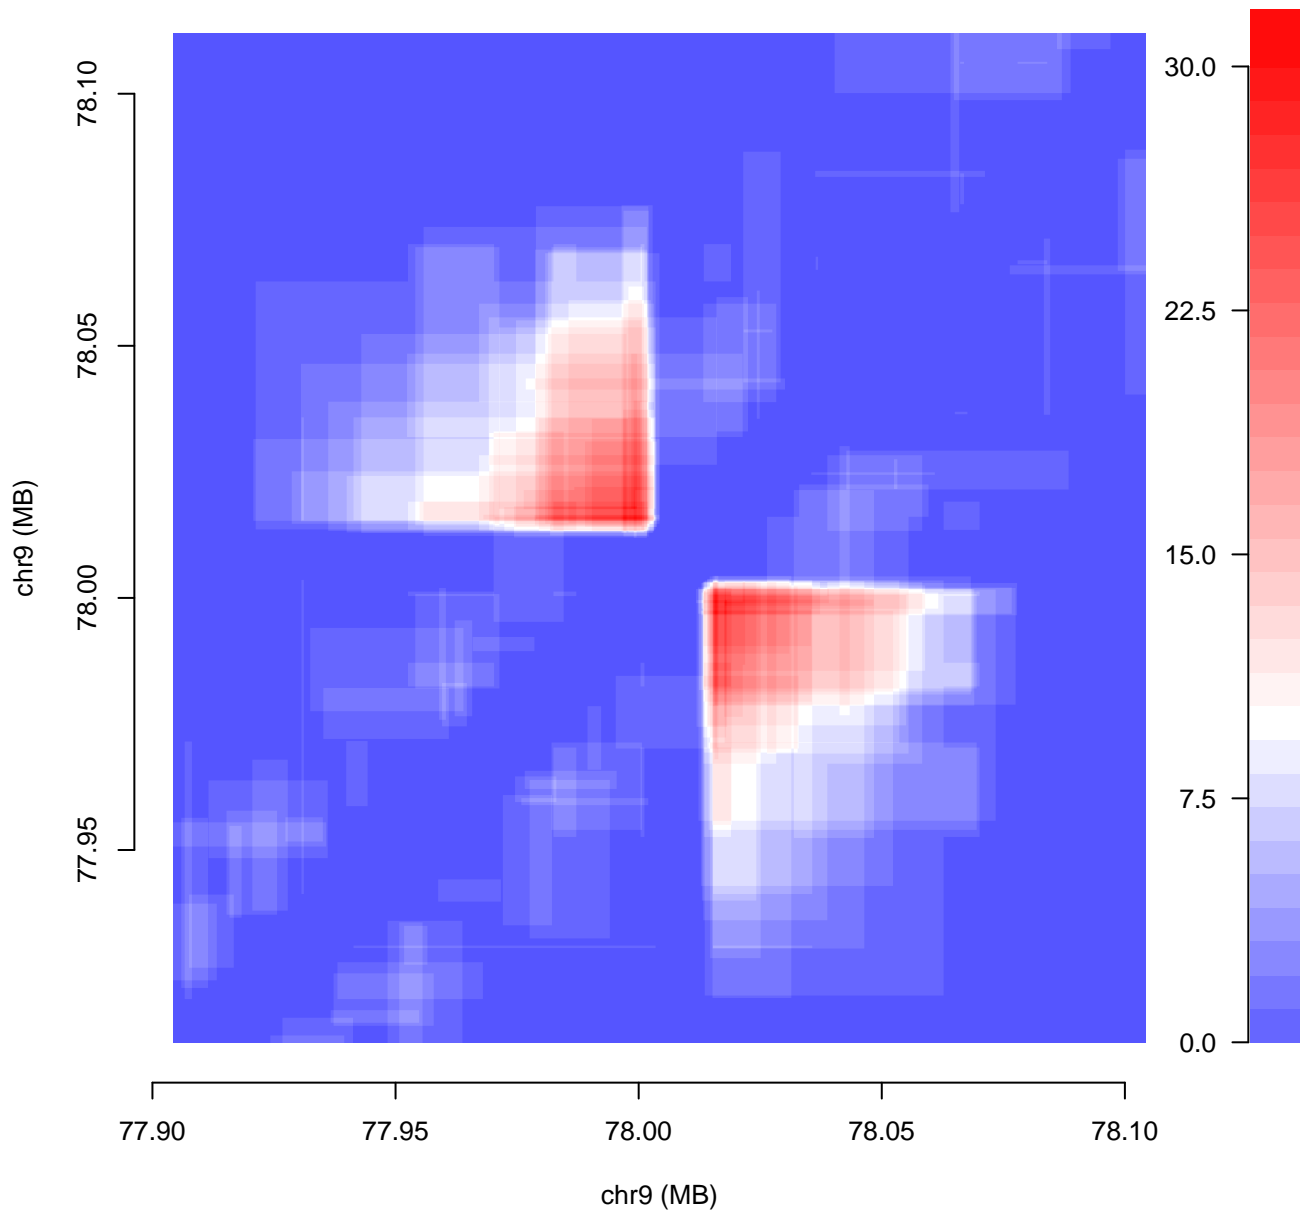

Supplement: Supplemental_Data.zip [file event_256.pdf › event_256.pdf]

Barcode

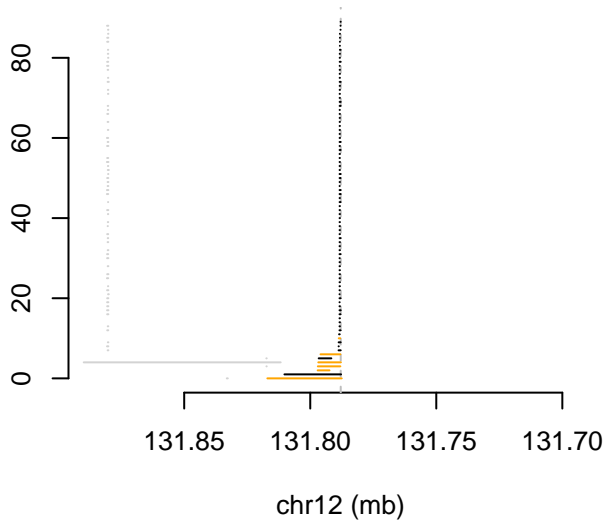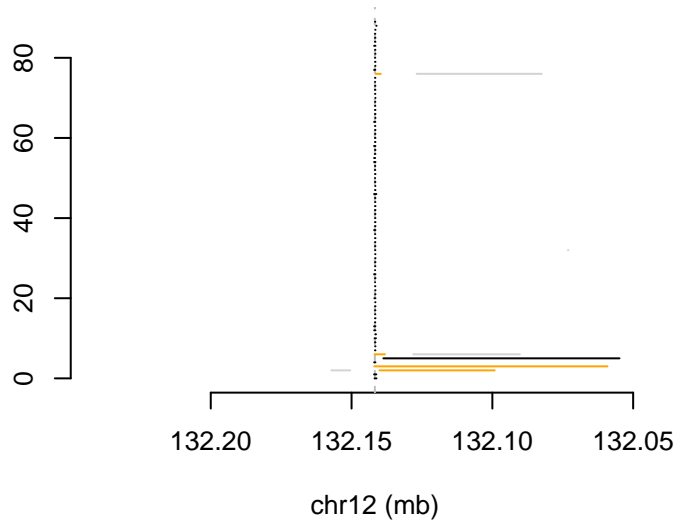

Copy number

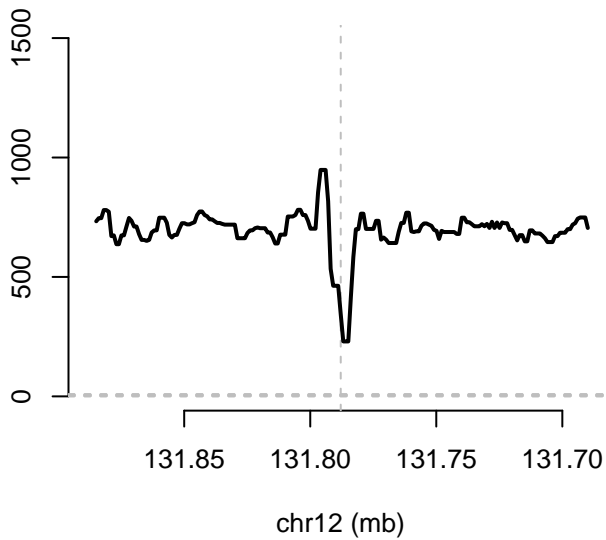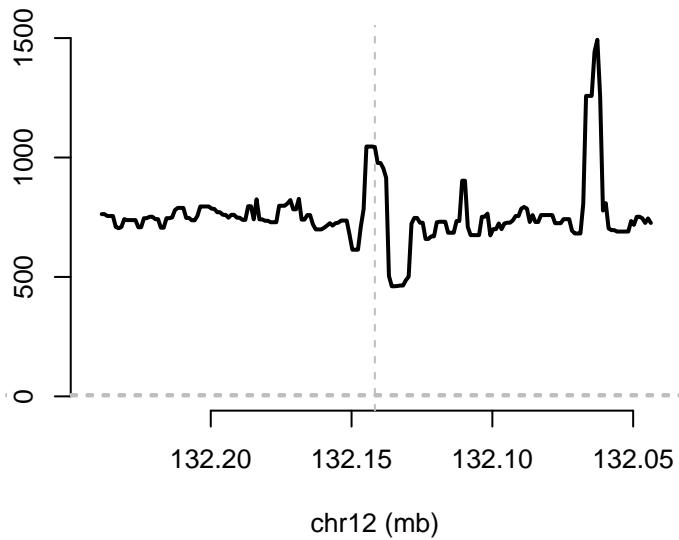

K562 chr12:131,787,902::chr12:132,141,726-+

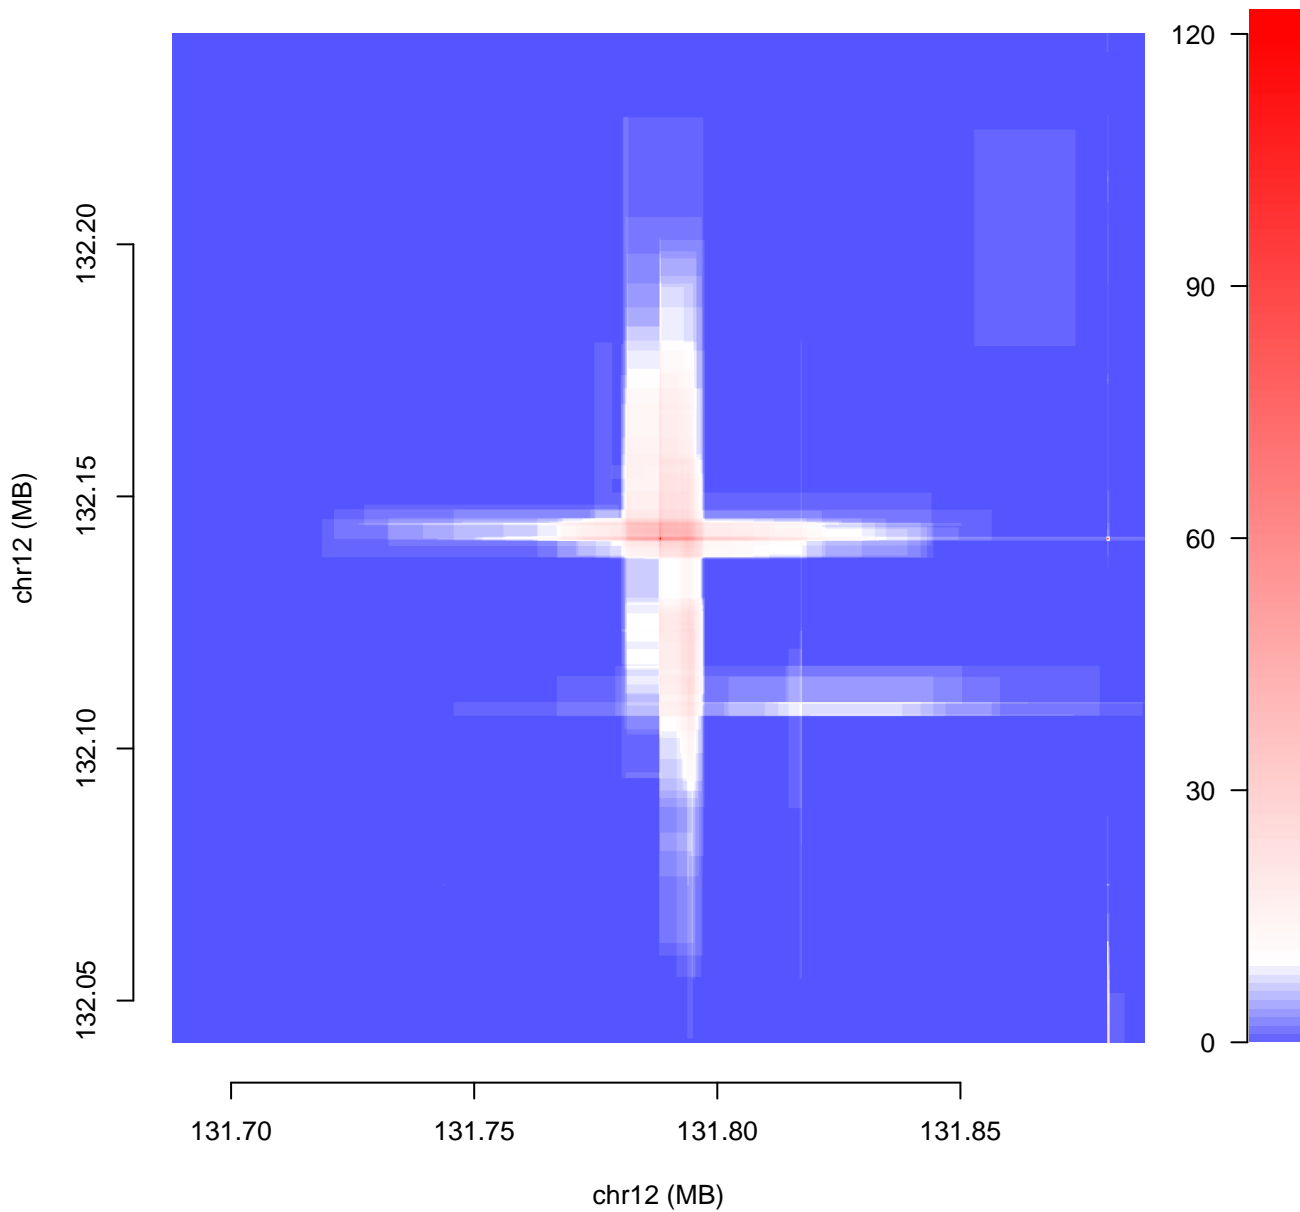

Supplement: Supplemental_Data.zip [file event_257.pdf › event_257.pdf]

Barcode

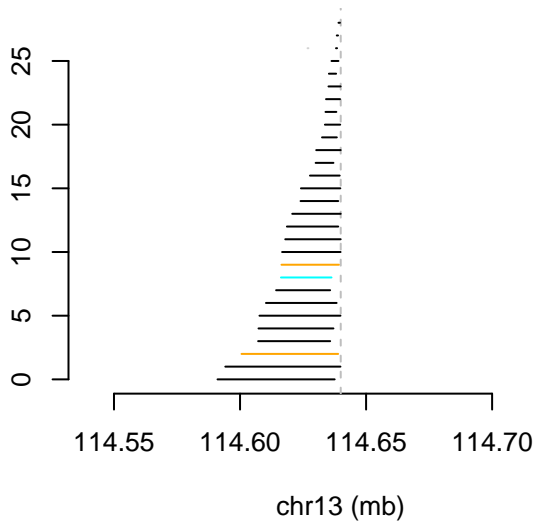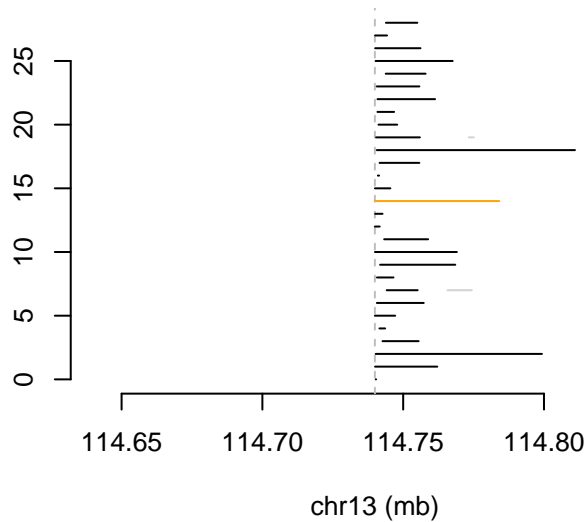

Copy number

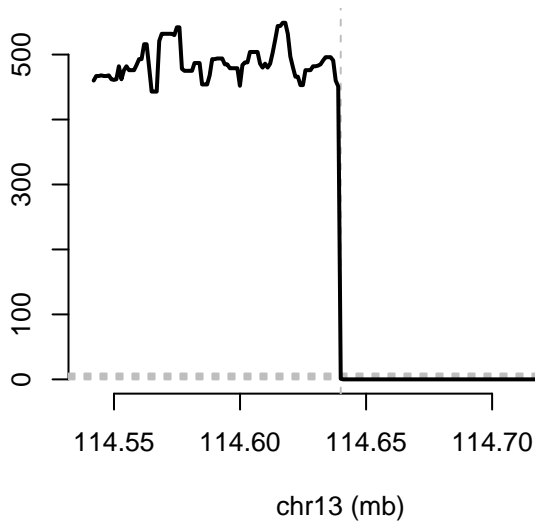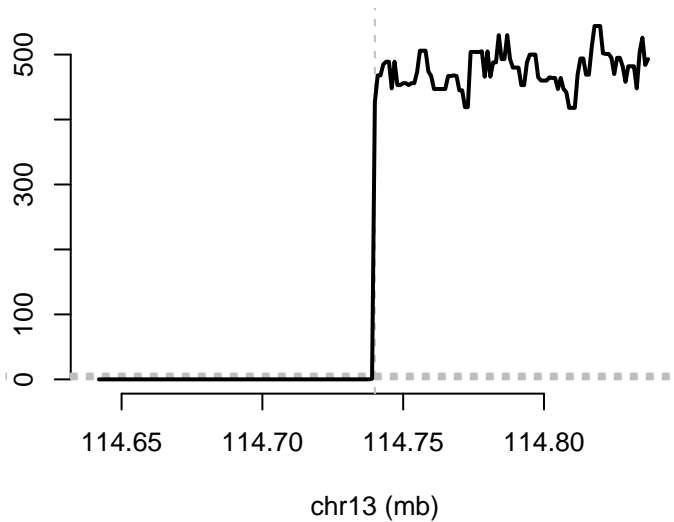

K562 chr13:114,639,948::chr13:114,739,948+-

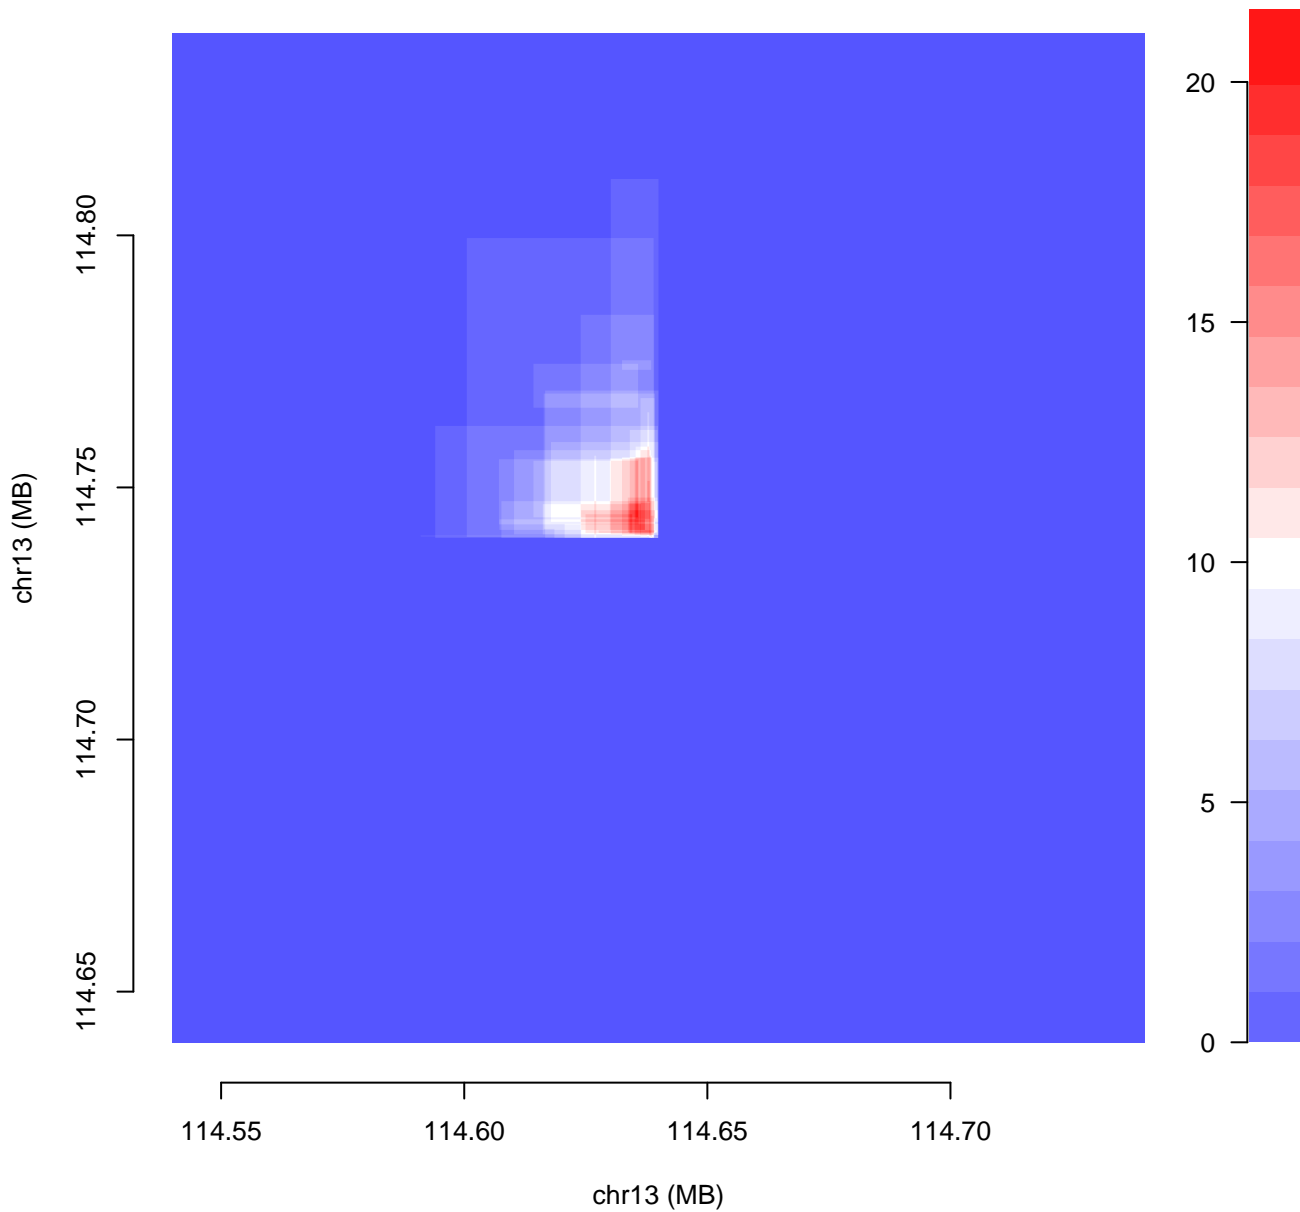

Supplement: Supplemental_Data.zip [file event_258.pdf › event_258.pdf]

Barcode

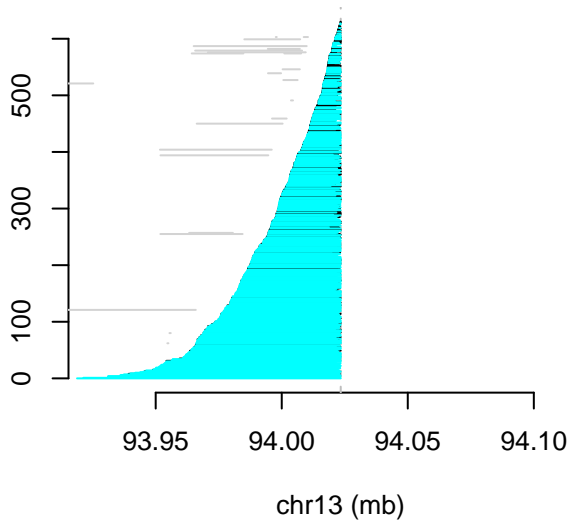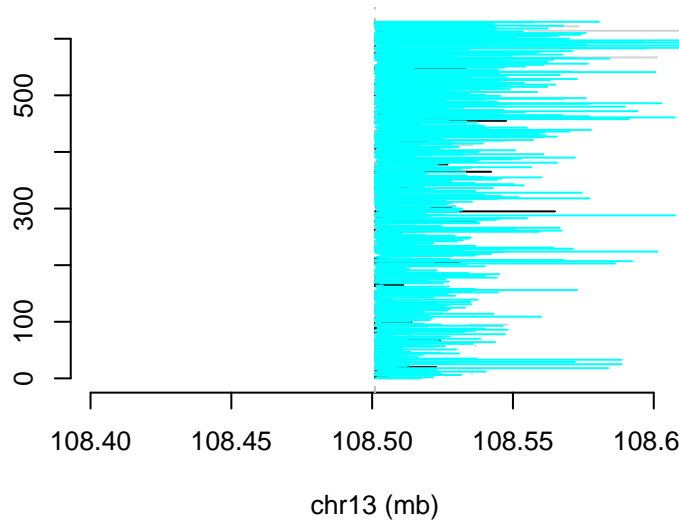

Copy number

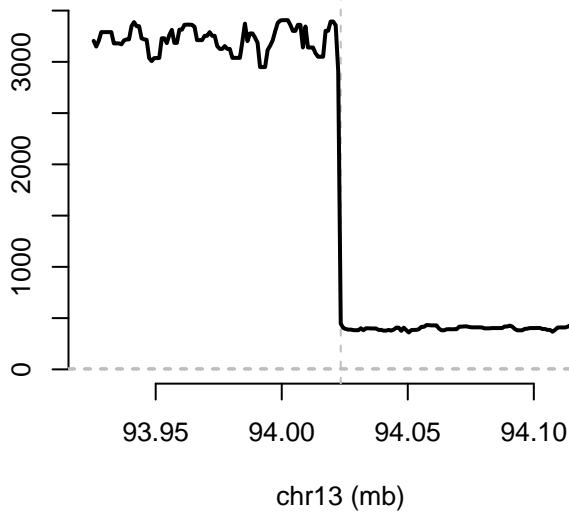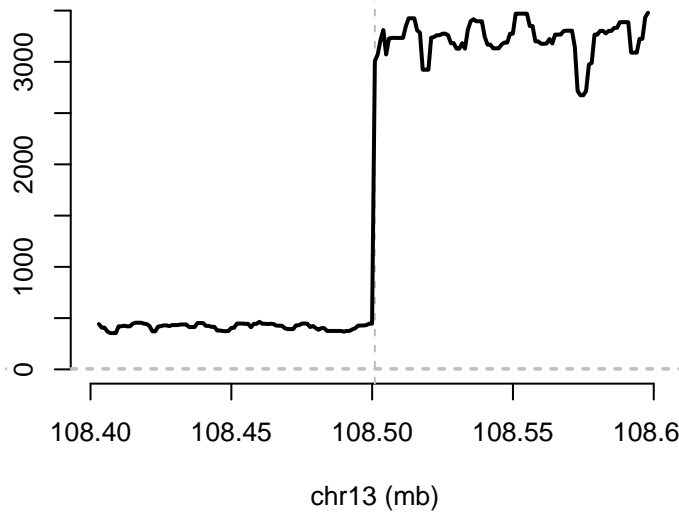

**K562 chr13:108,500,972::chr13:94,023,408--+**

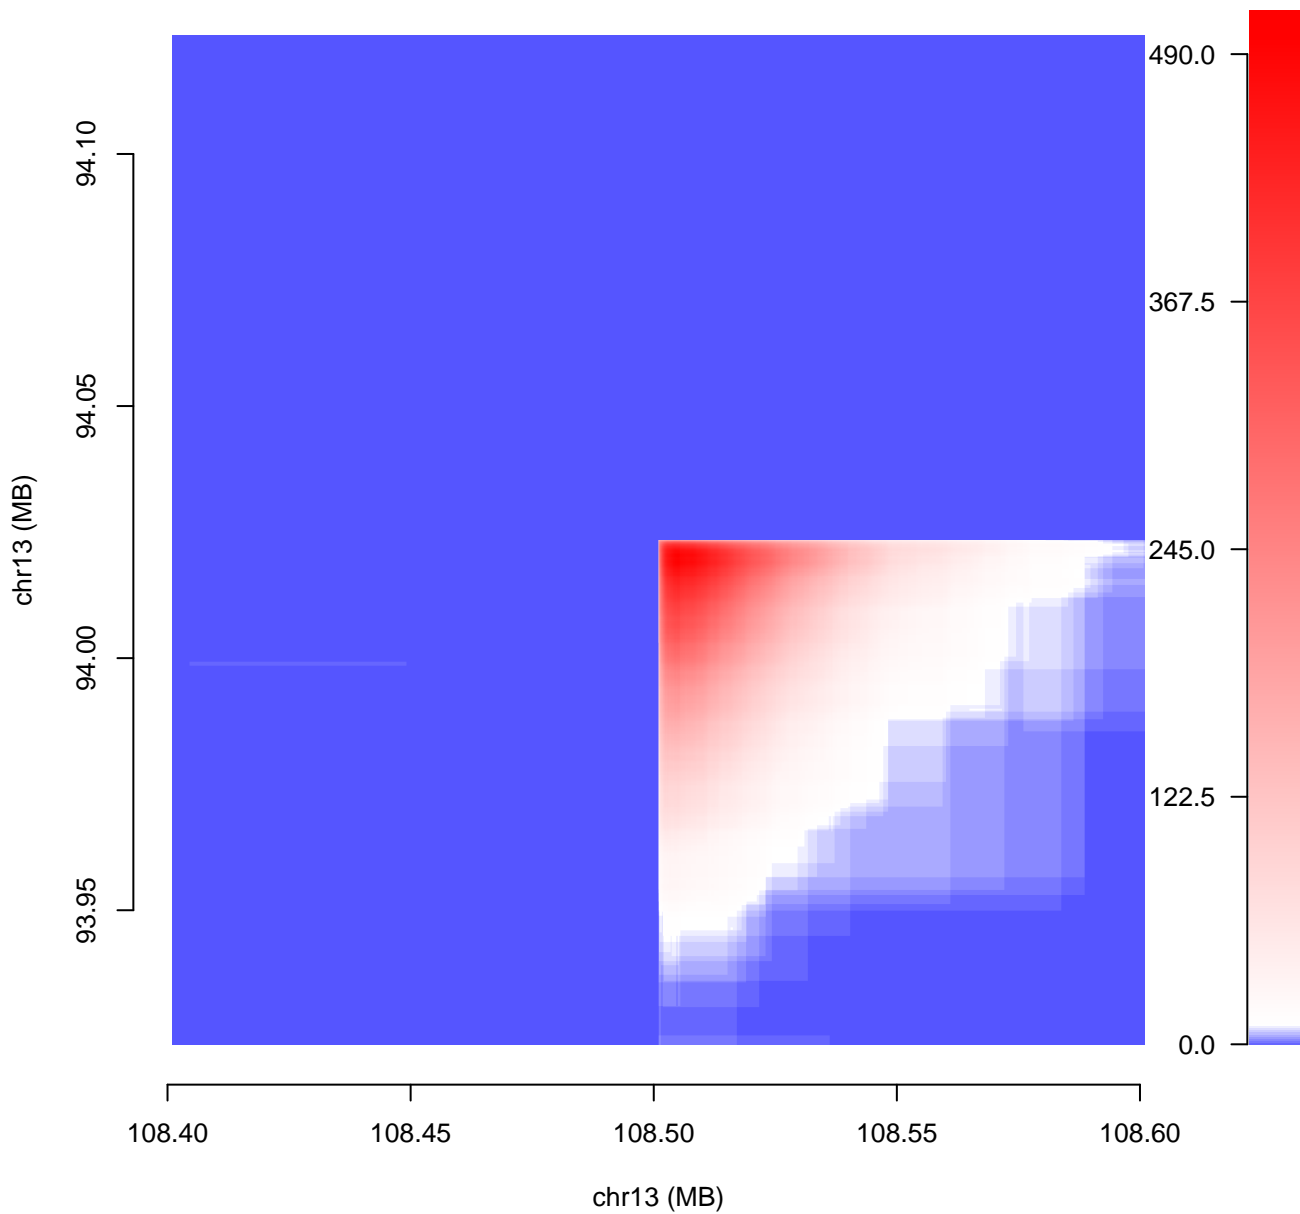

Supplement: Supplemental_Data.zip [file event_259.pdf › event_259.pdf]

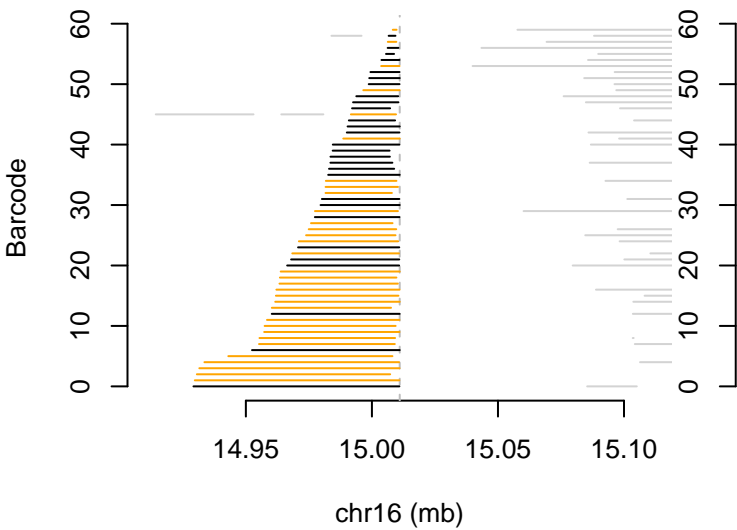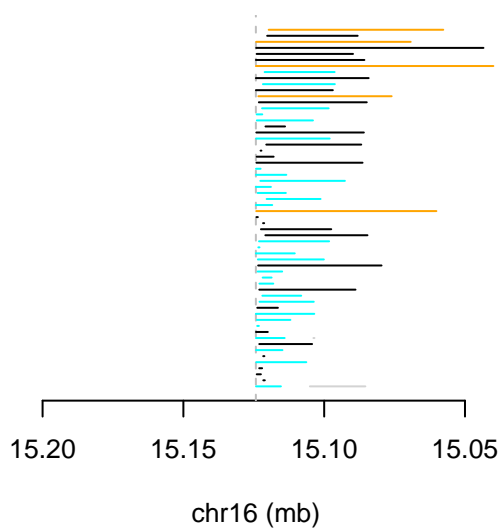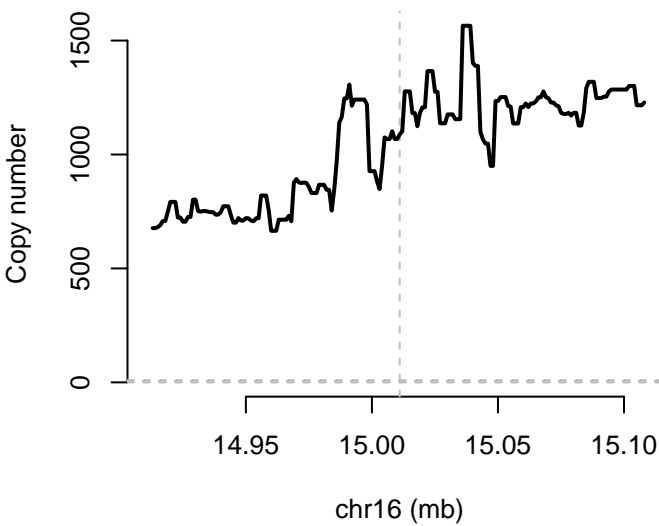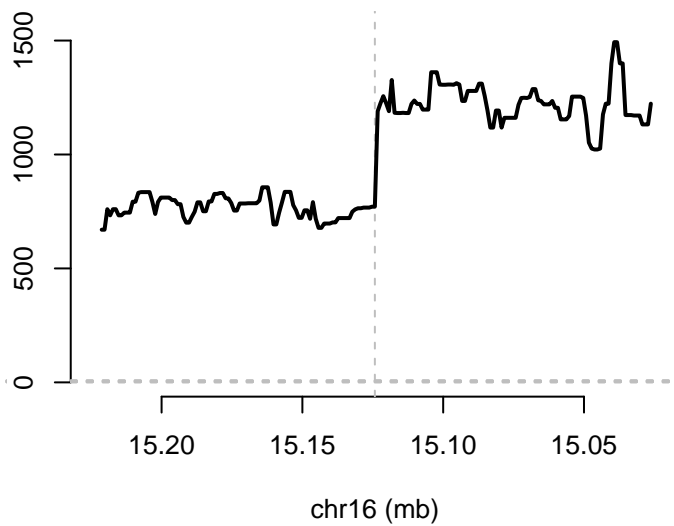

K562 chr16:15,011,036::chr16:15,124,264++

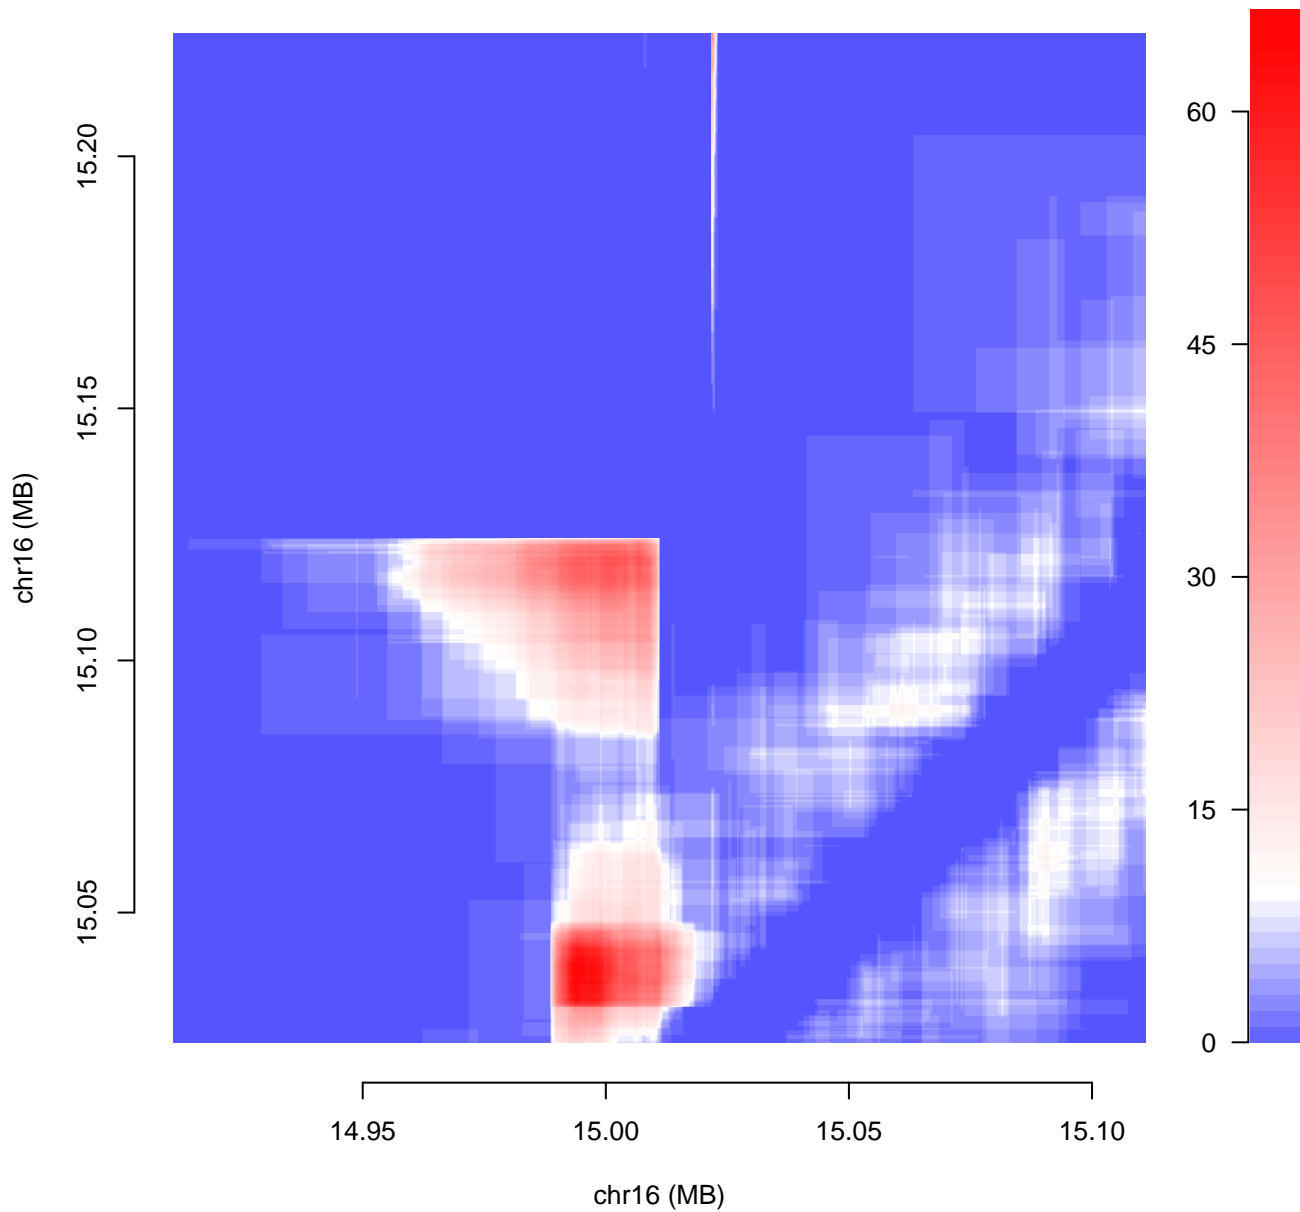

Supplement: Supplemental_Data.zip [file event_26.pdf › event_26.pdf]

Barcode

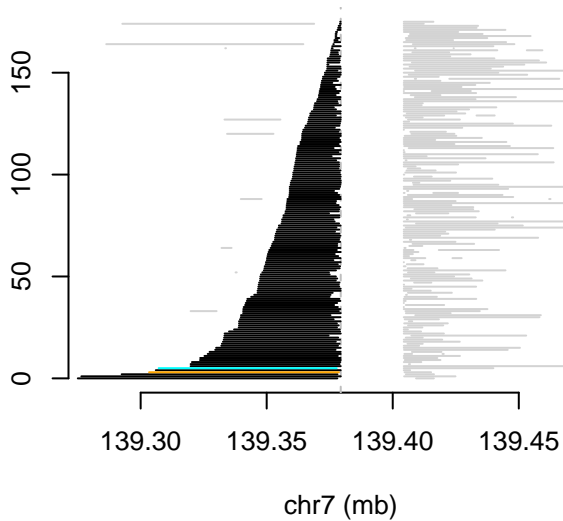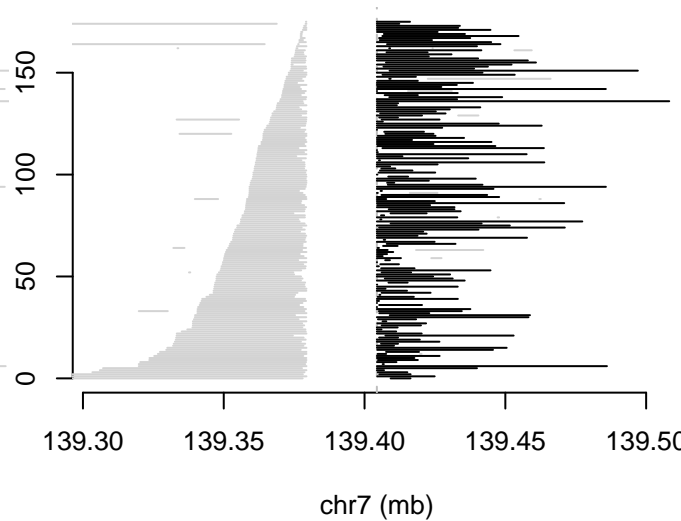

Copy number

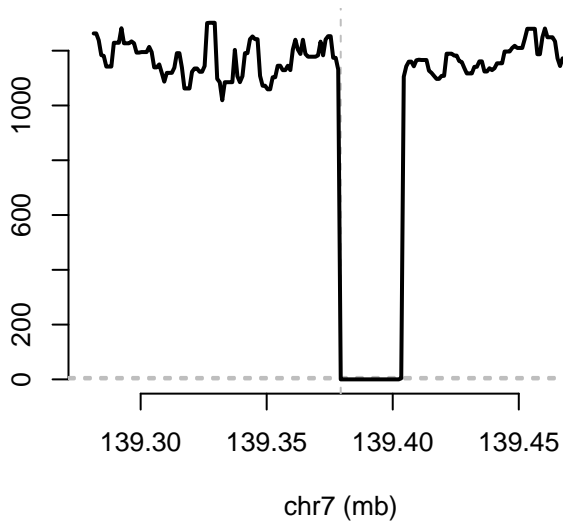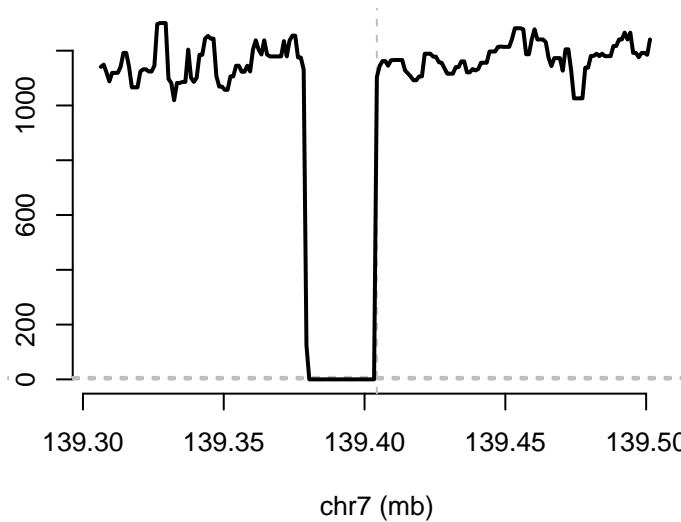

K562 chr7:139,404,375::chr7:139,379,377-+

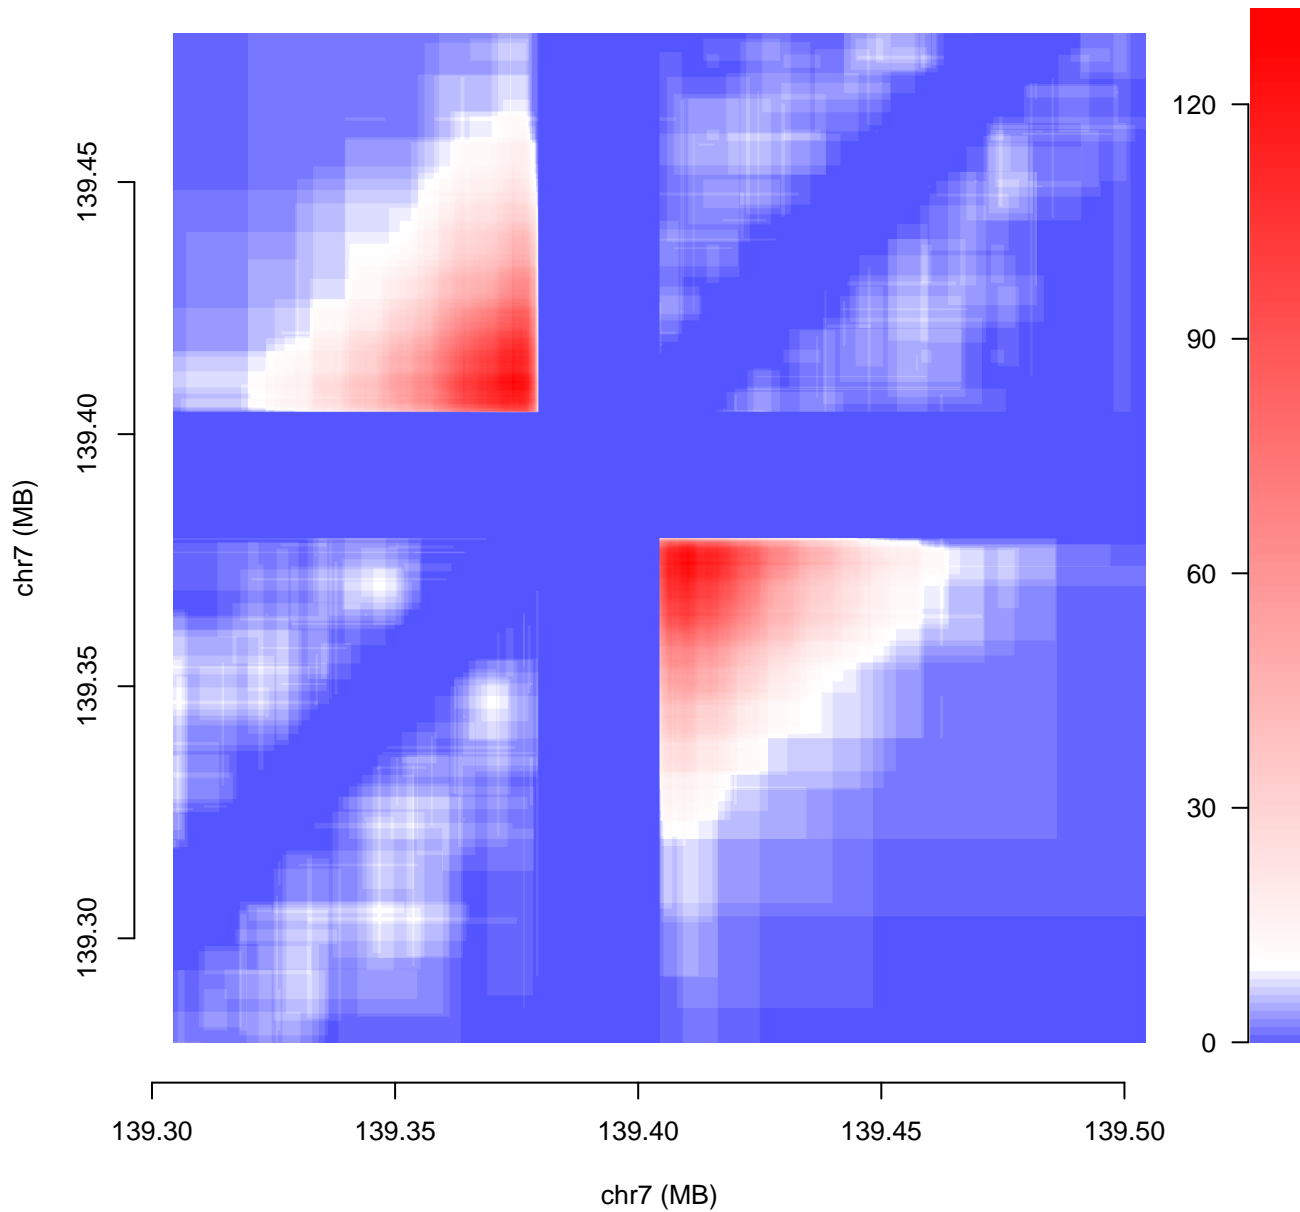

Supplement: Supplemental_Data.zip [file event_260.pdf › event_260.pdf]

Barcode

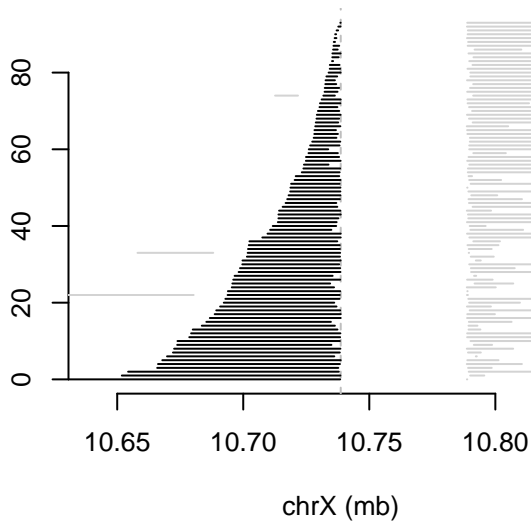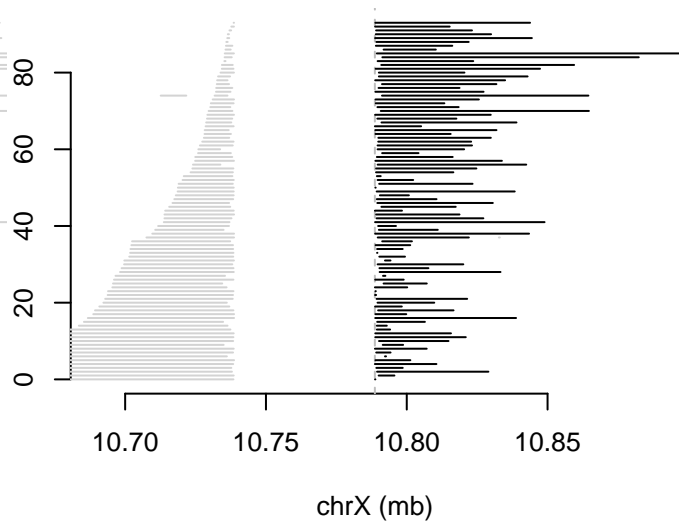

Copy number

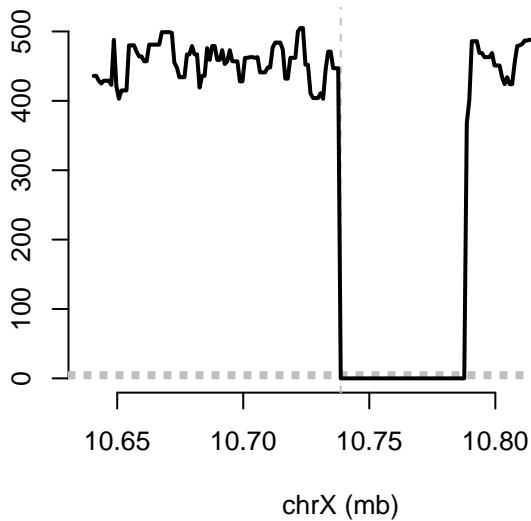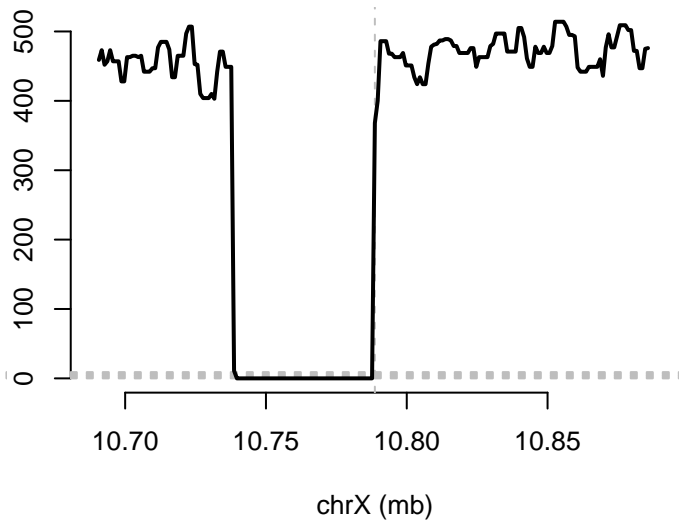

K562 chrX:10,788,673::chrX:10,738,674--+

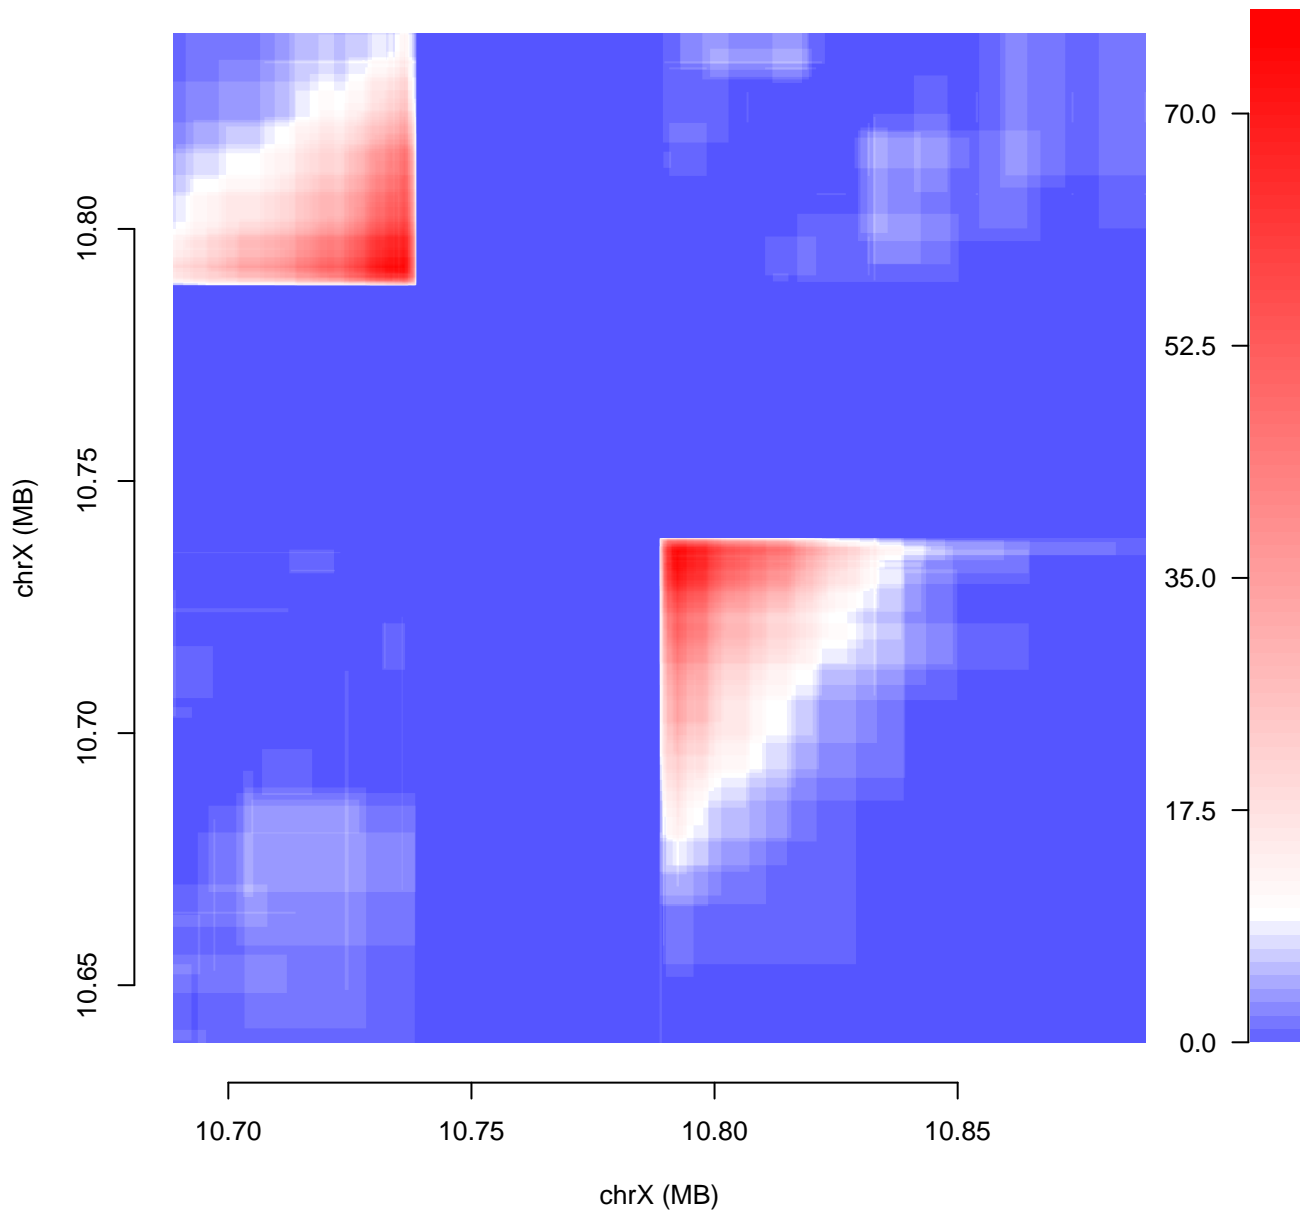

Supplement: Supplemental_Data.zip [file event_261.pdf › event_261.pdf]

Barcode

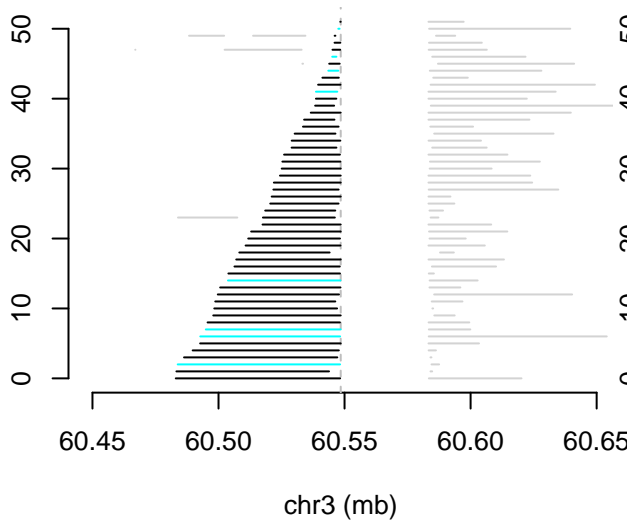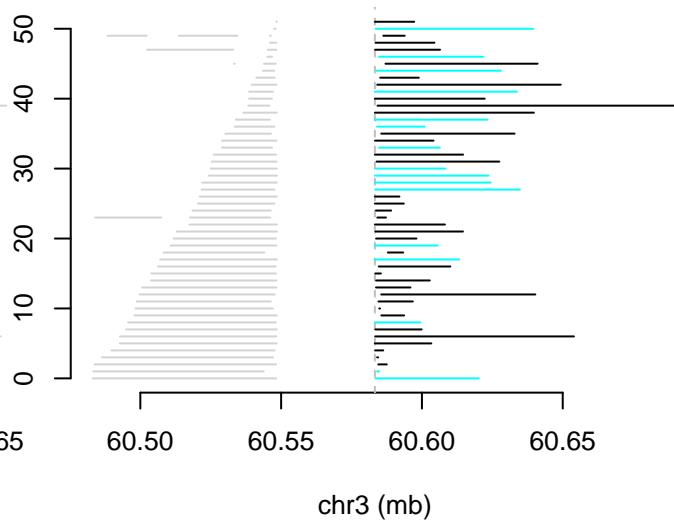

Copy number

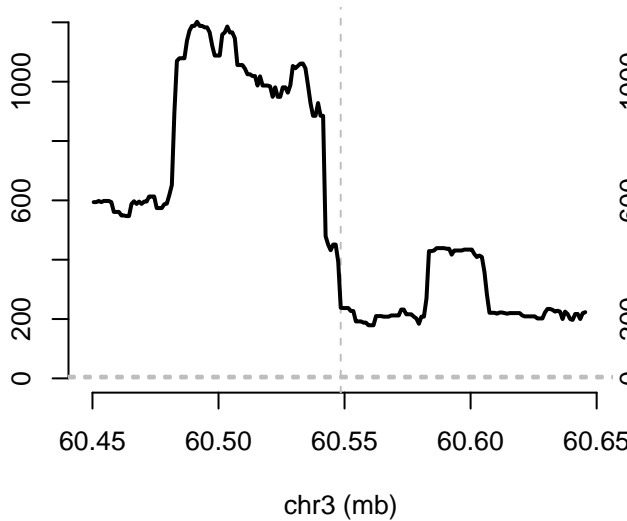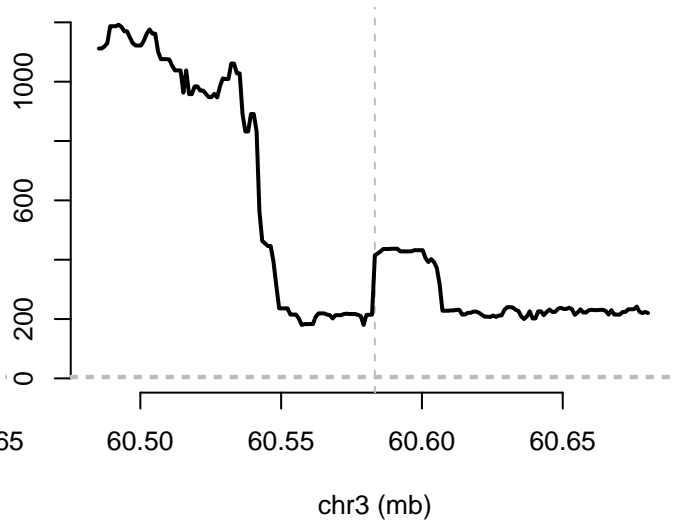

K562 chr3:60,548,487::chr3:60,583,287+-

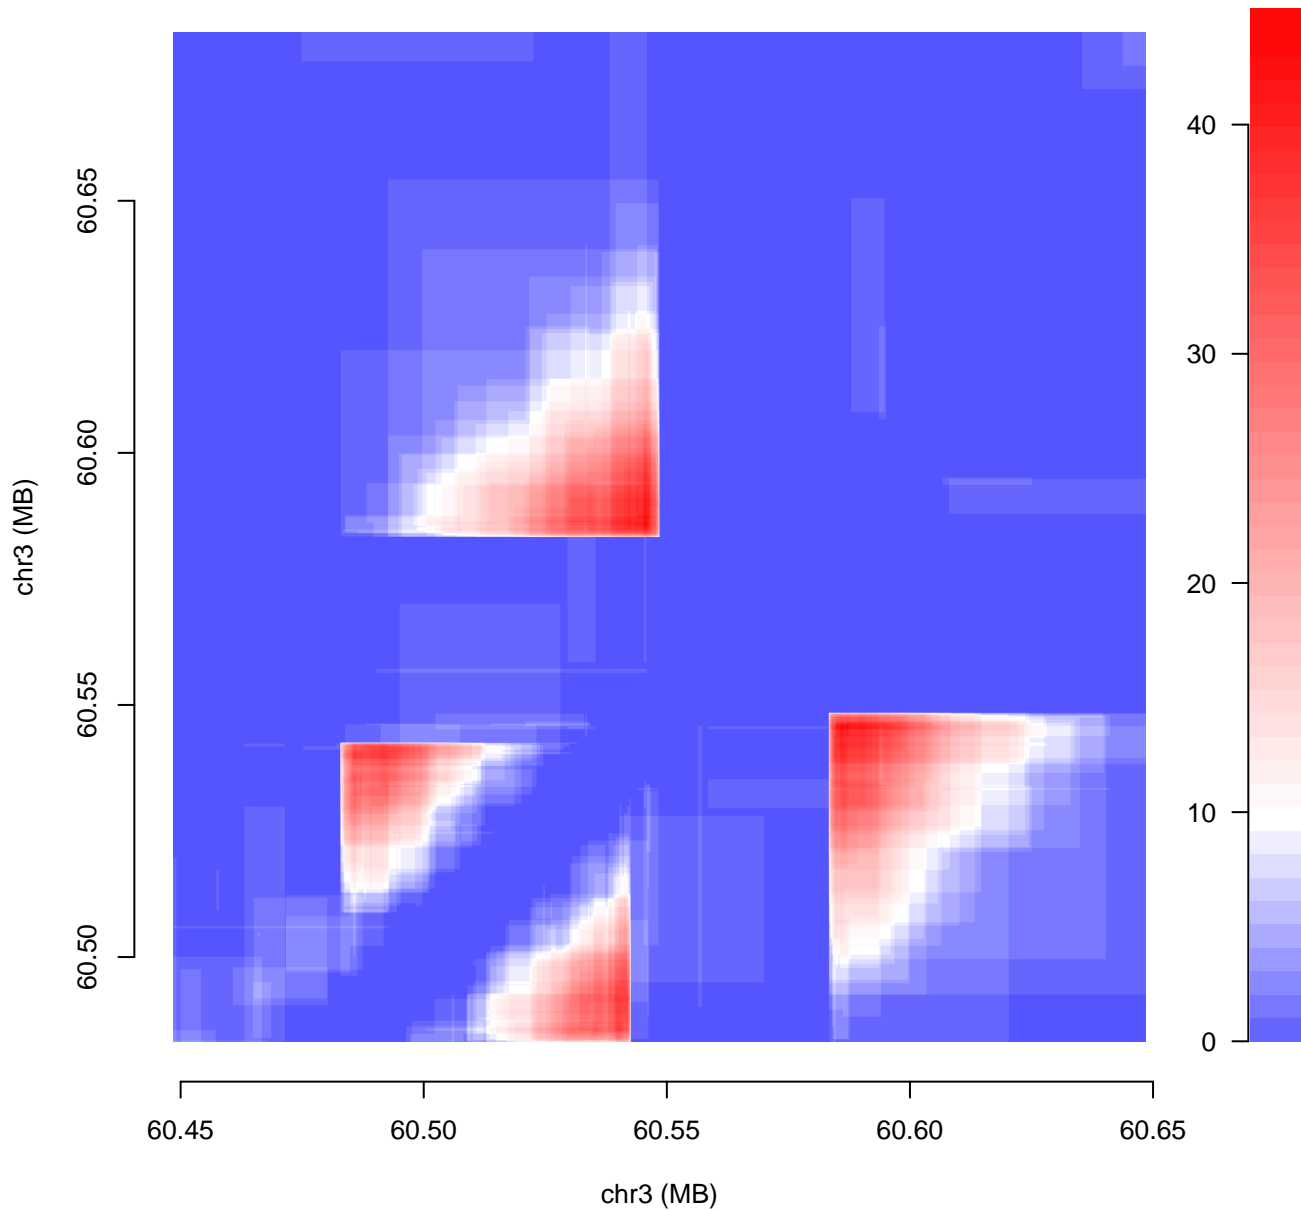

Supplement: Supplemental_Data.zip [file event_262.pdf › event_262.pdf]

Barcode

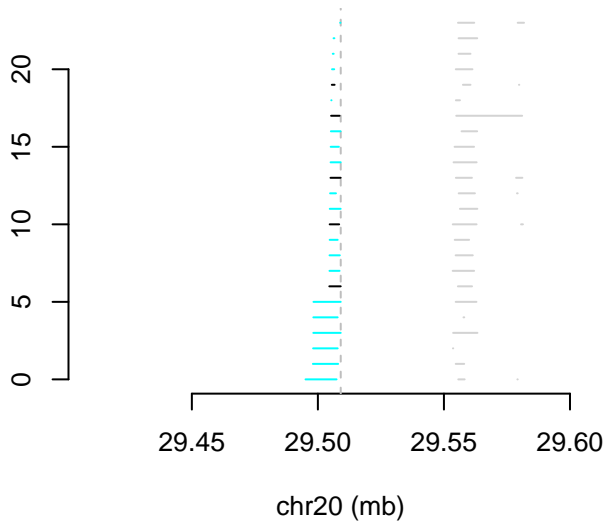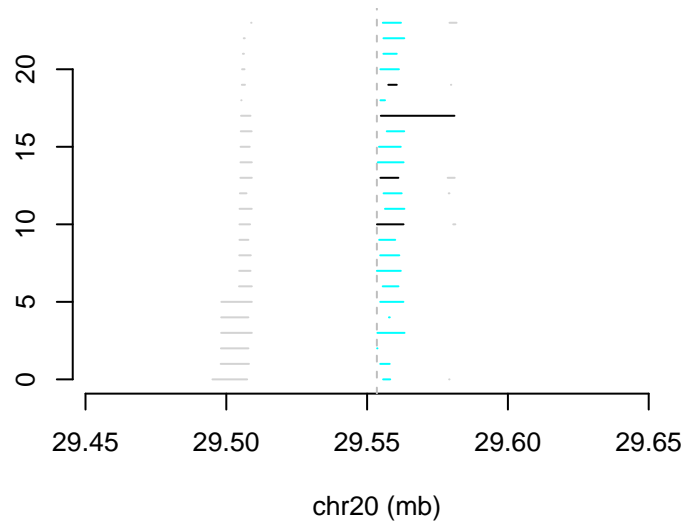

Copy number

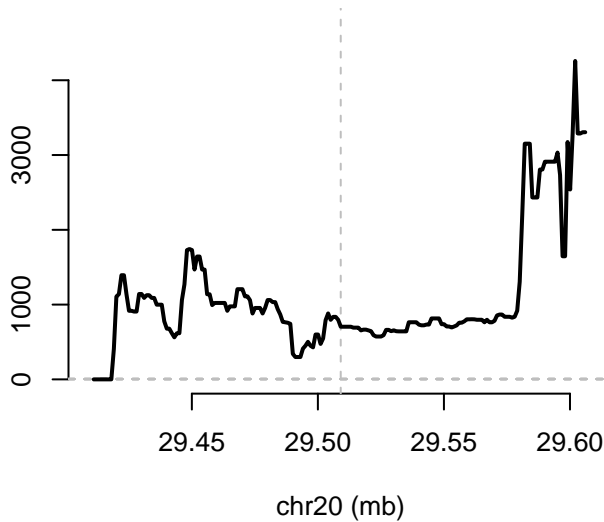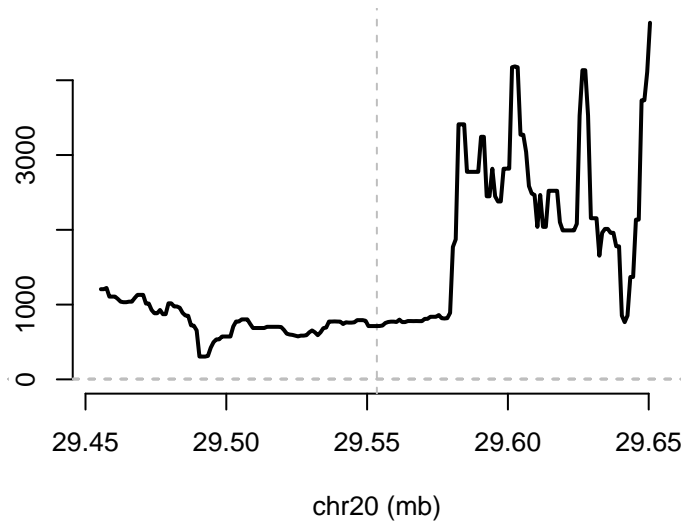

K562 chr20:29,553,472::chr20:29,509,066-+

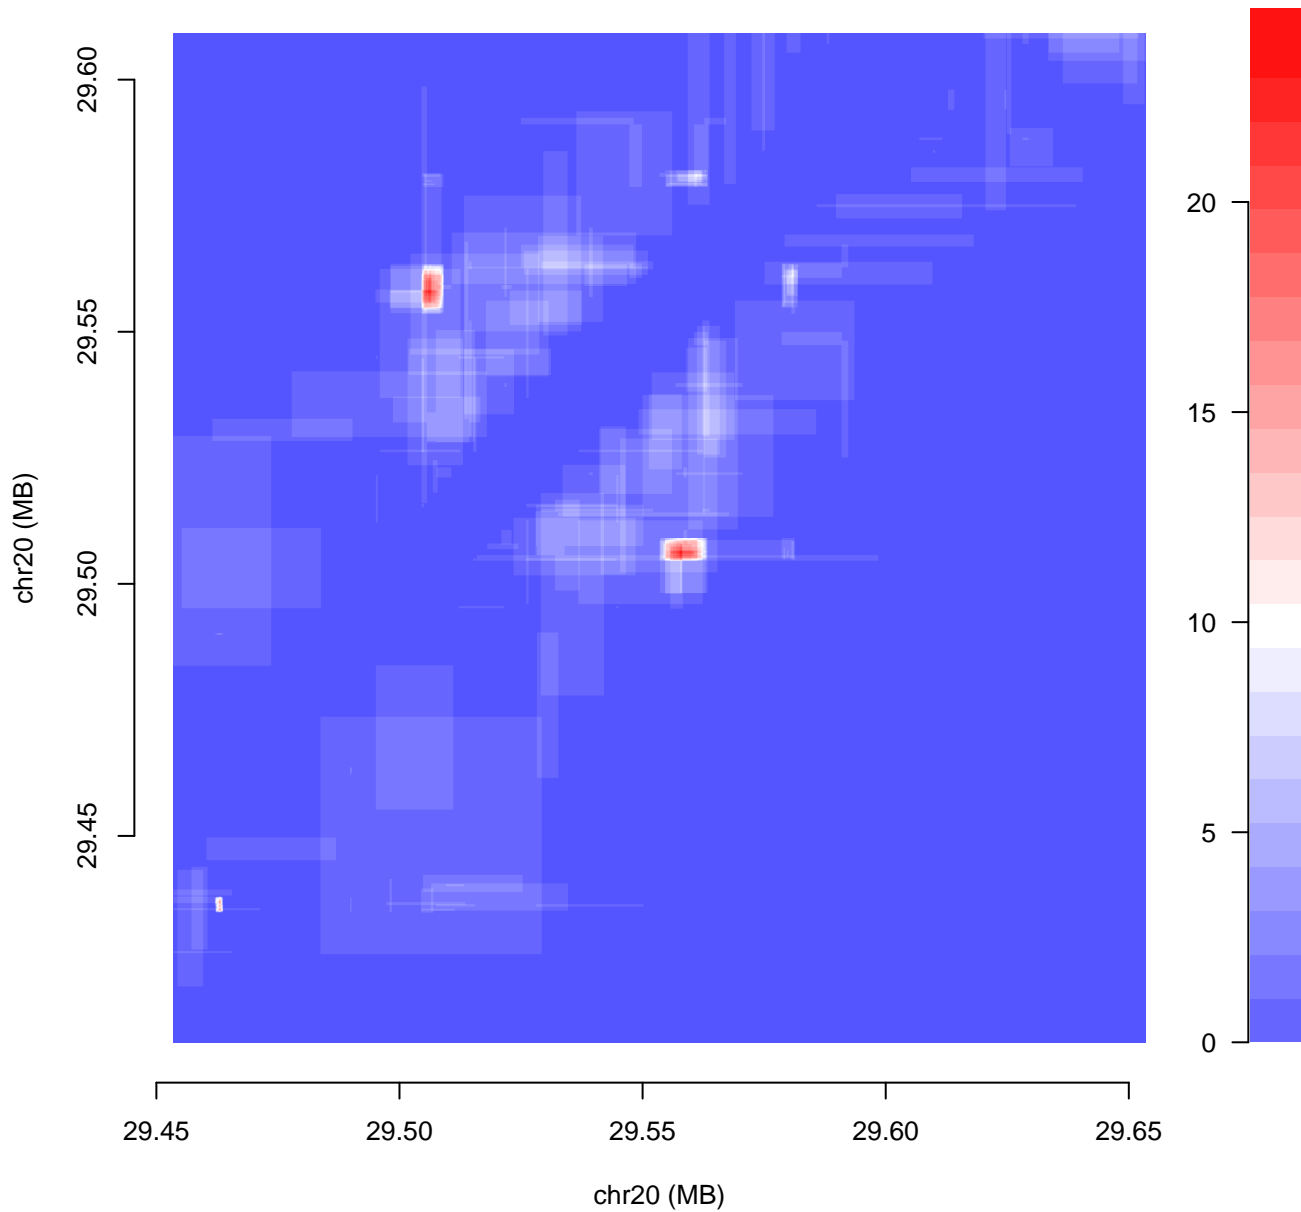

Supplement: Supplemental_Data.zip [file event_263.pdf › event_263.pdf]

Barcode

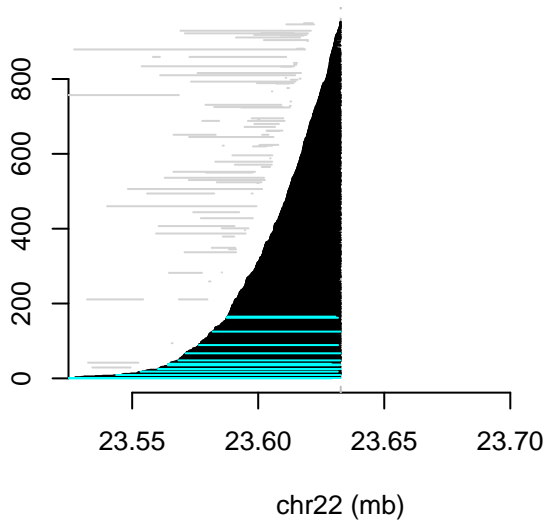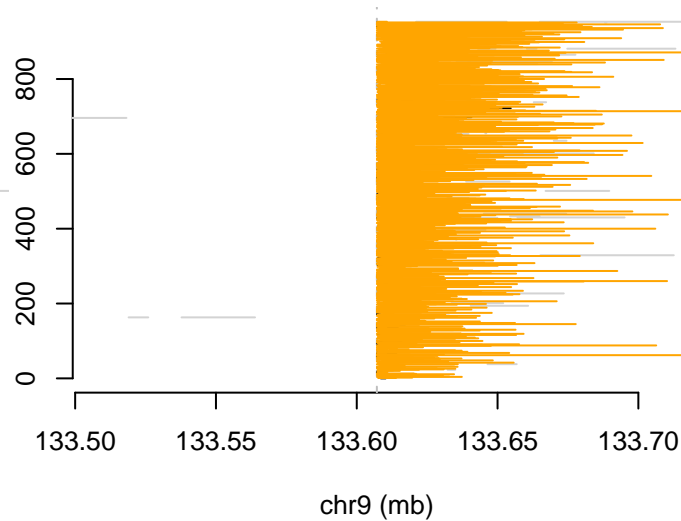

Copy number

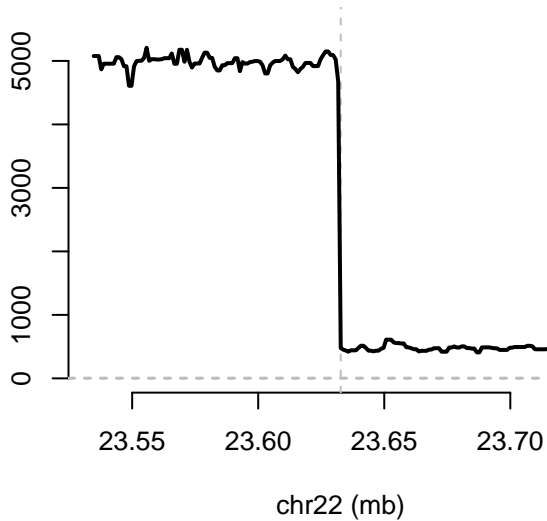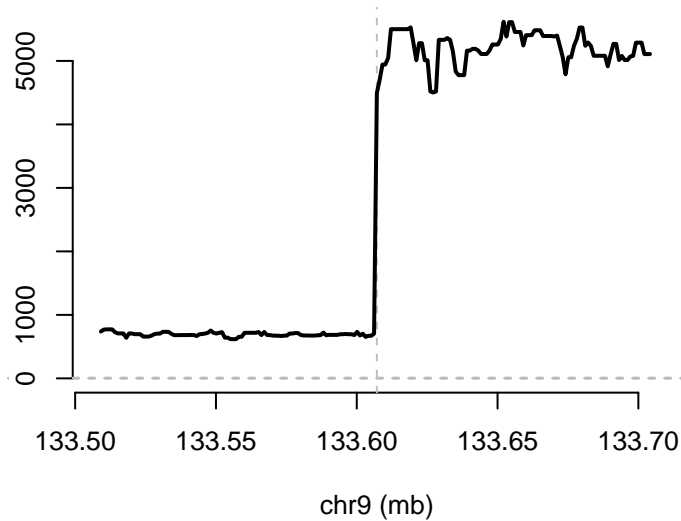

K562 chr9:133,607,146::chr22:23,632,742-+

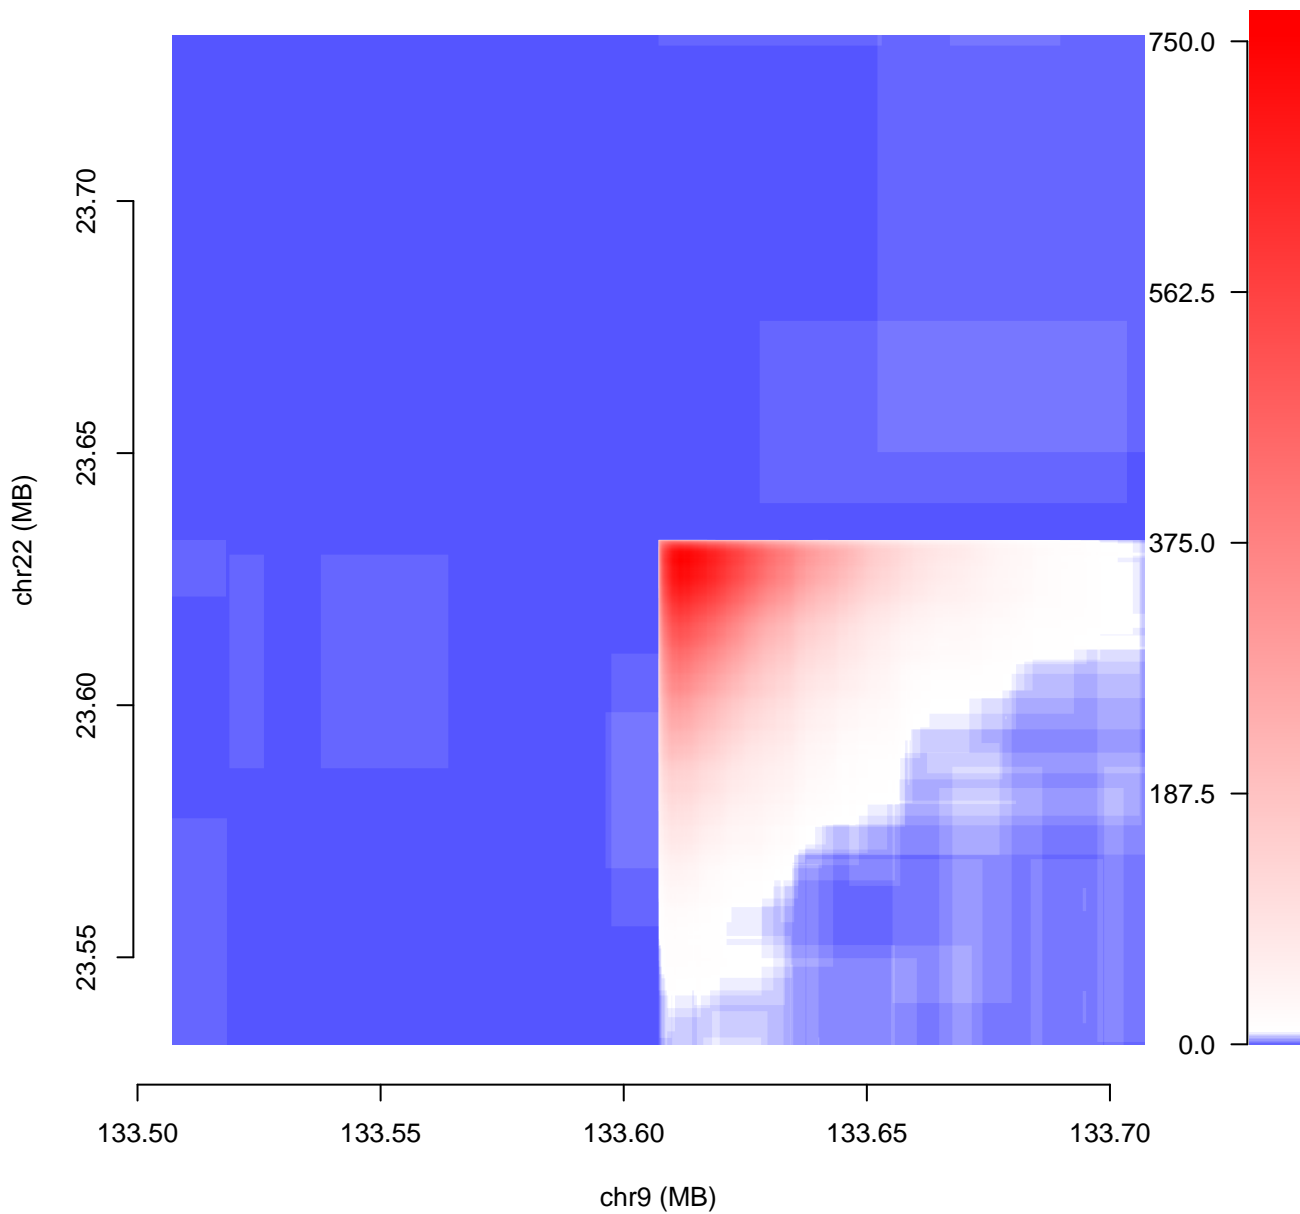

Supplement: Supplemental_Data.zip [file event_264.pdf › event_264.pdf]

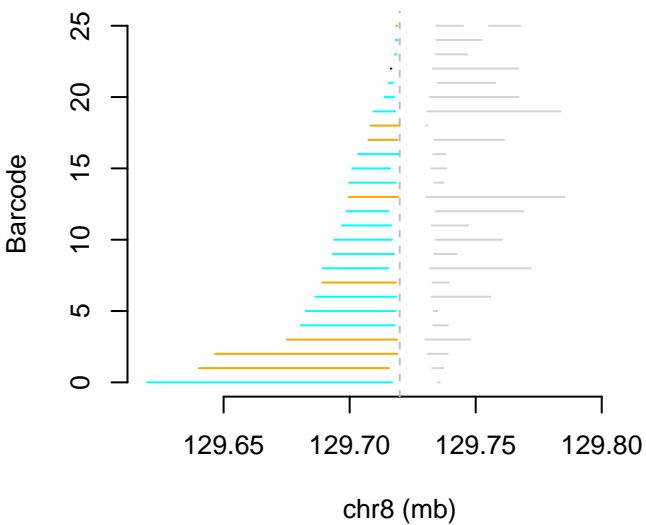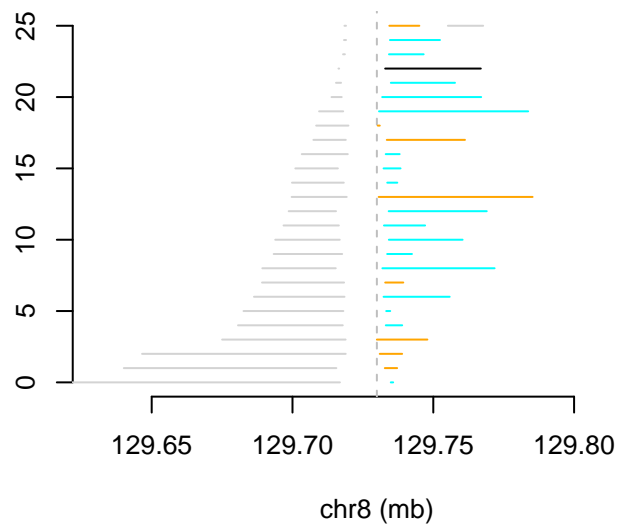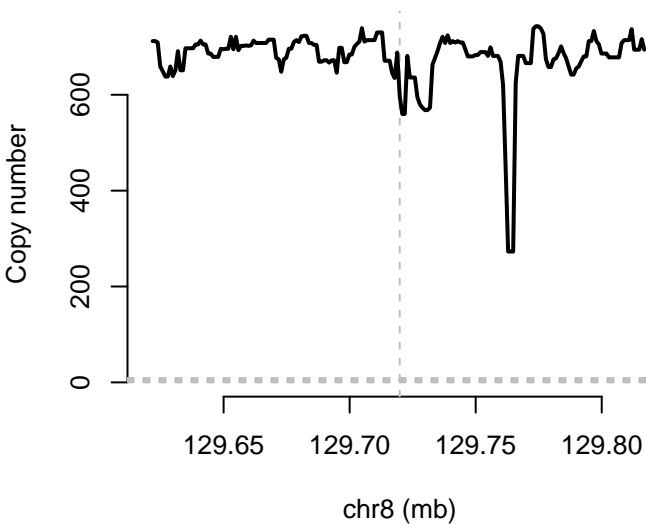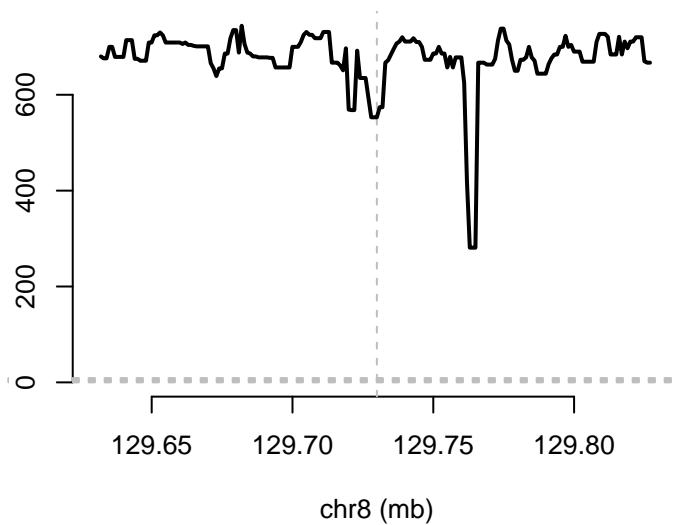

K562 chr8:129,719,873::chr8:129,729,968+-

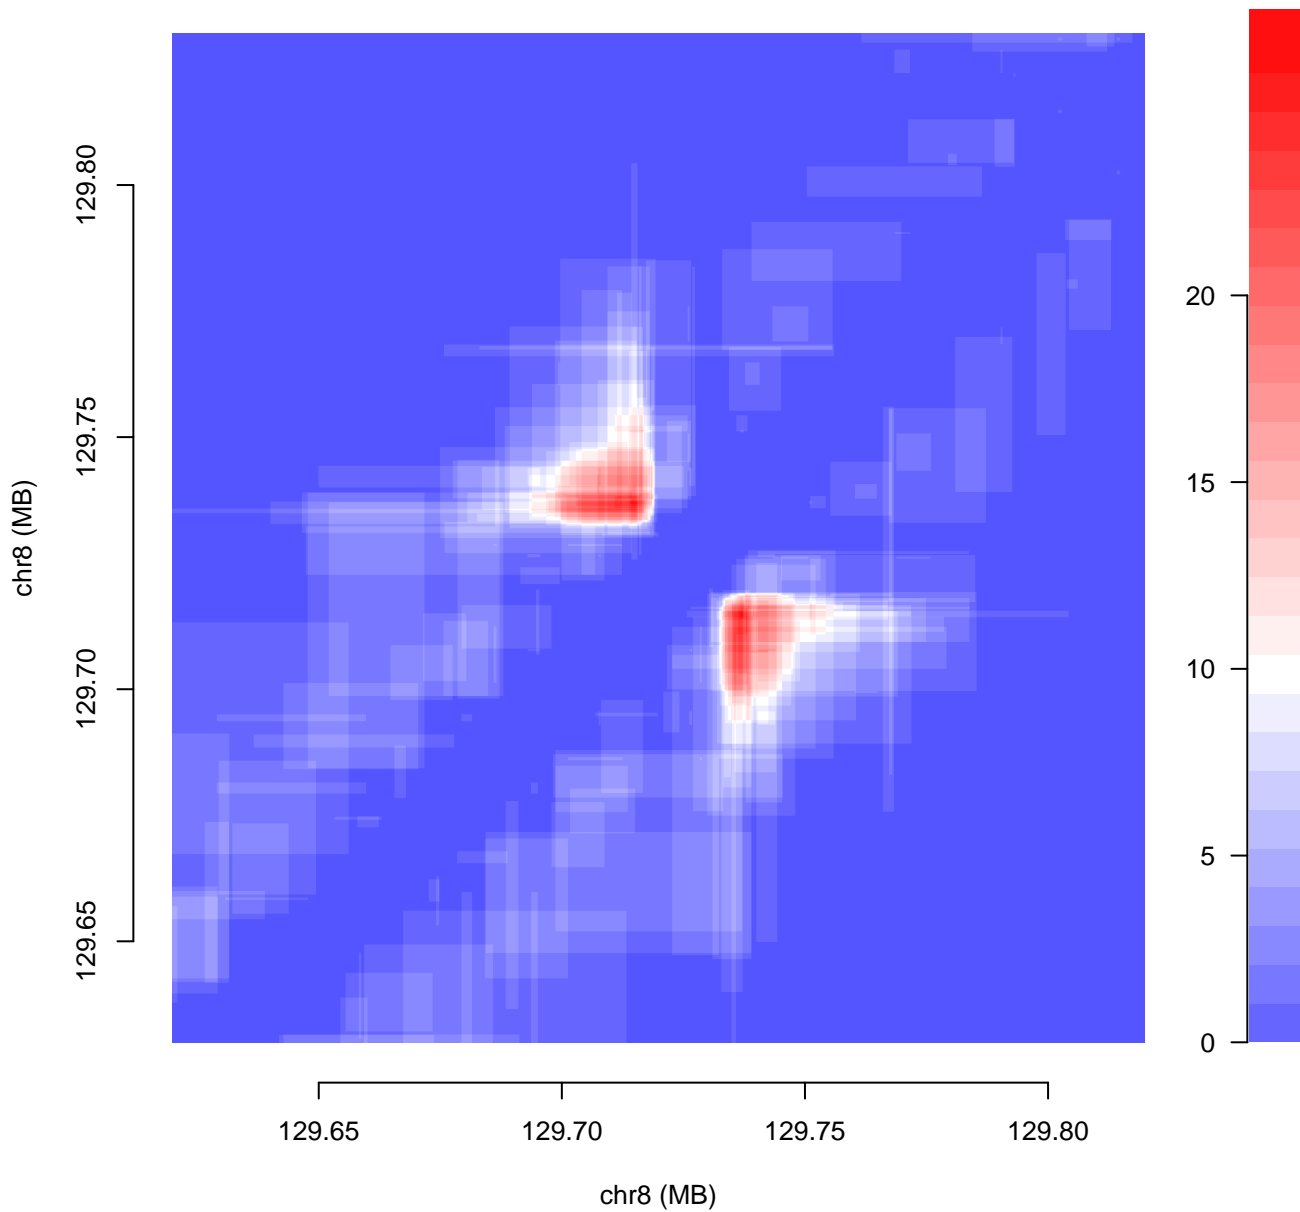

Supplement: Supplemental_Data.zip [file event_265.pdf › event_265.pdf]

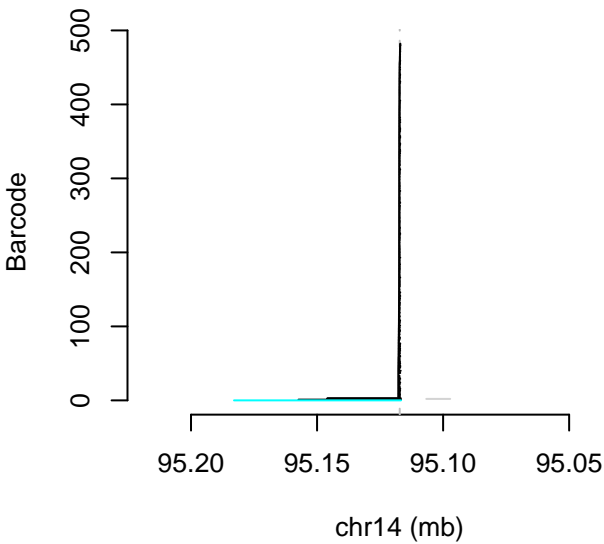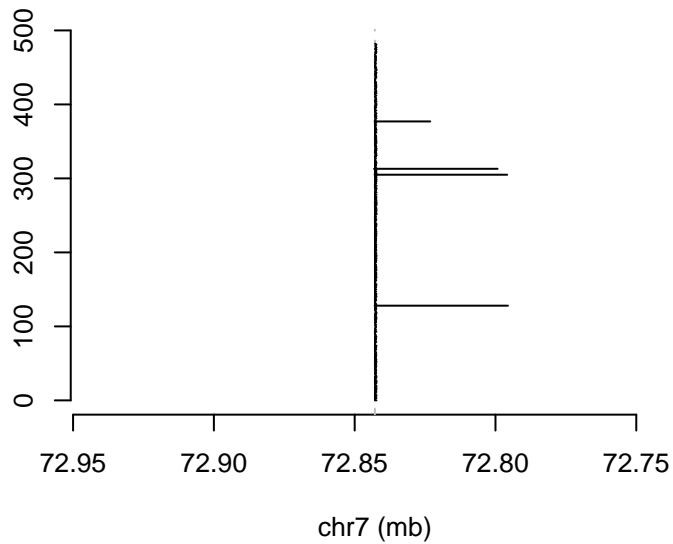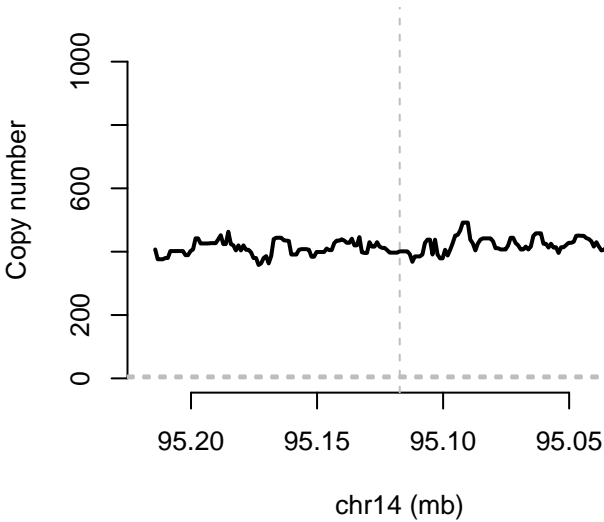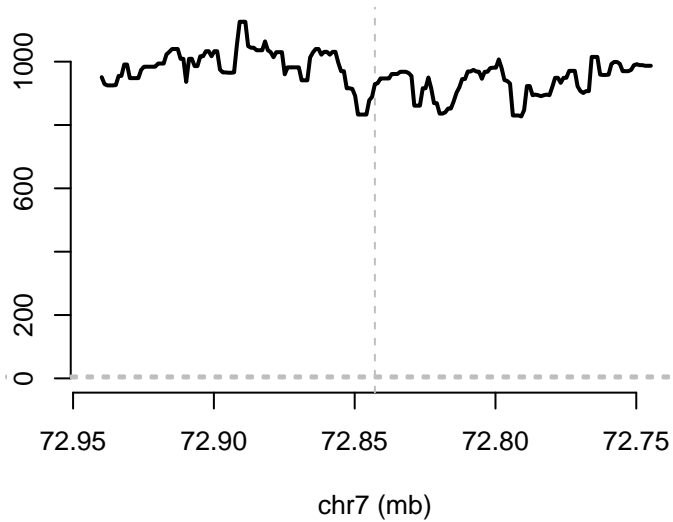

K562 chr7:72,842,830::chr14:95,117,204+-

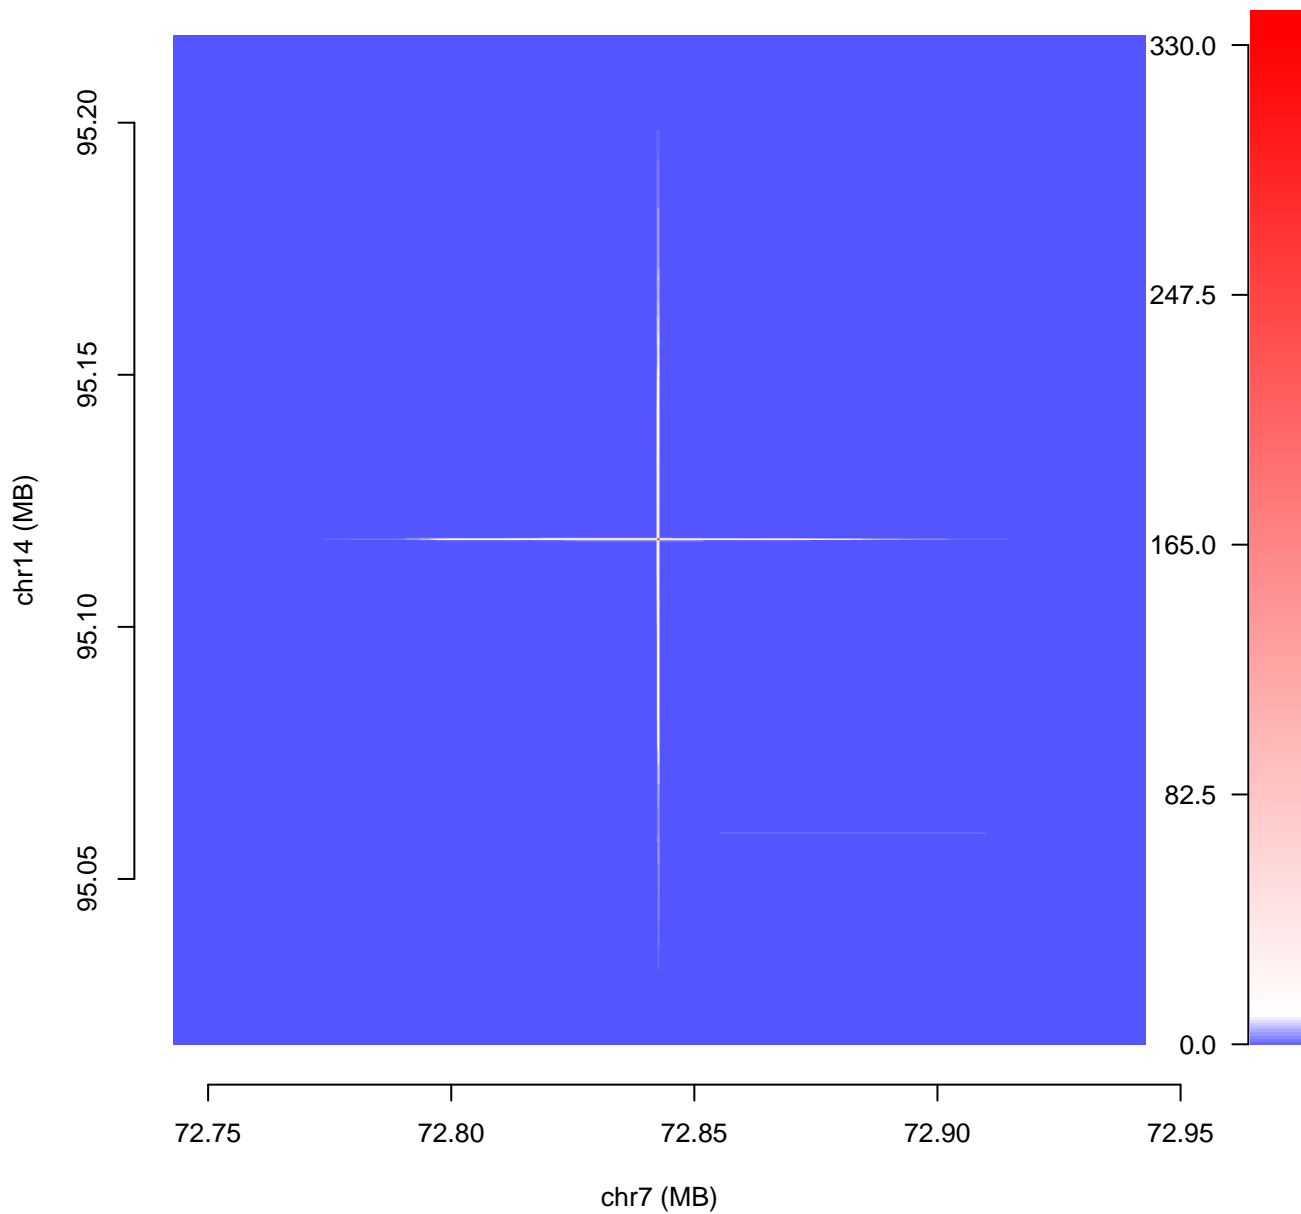

Supplement: Supplemental_Data.zip [file event_266.pdf › event_266.pdf]

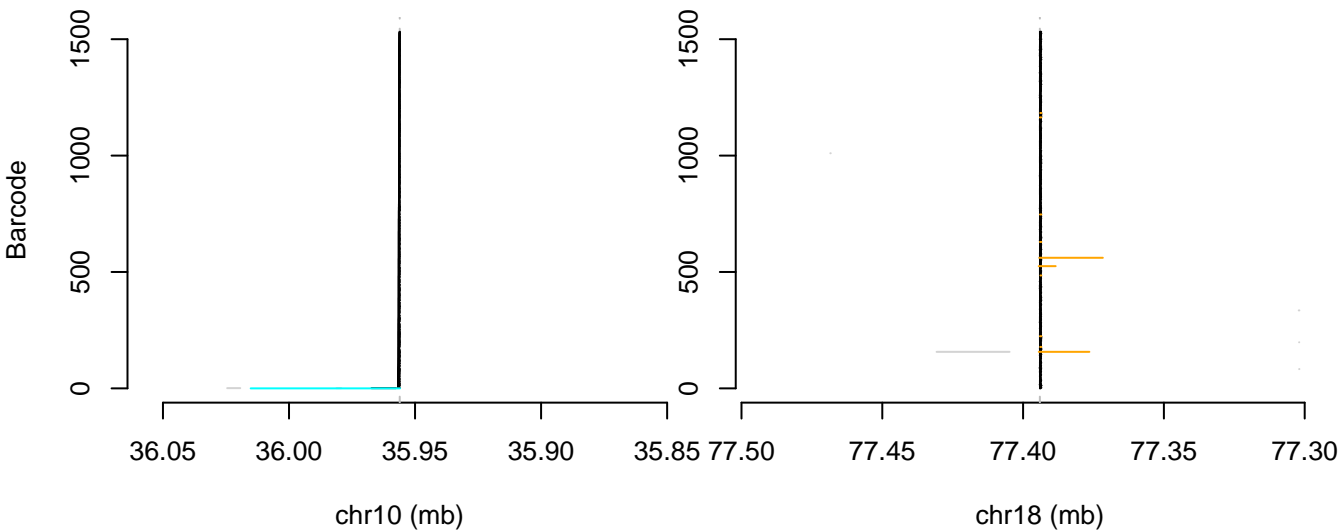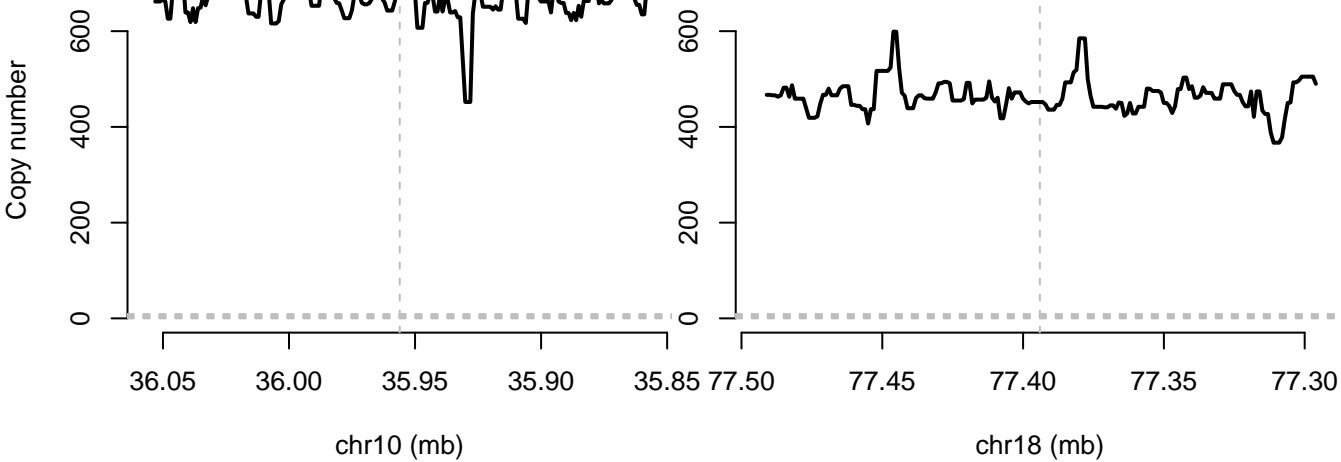

K562 chr10:35,956,072::chr18:77,394,038-+

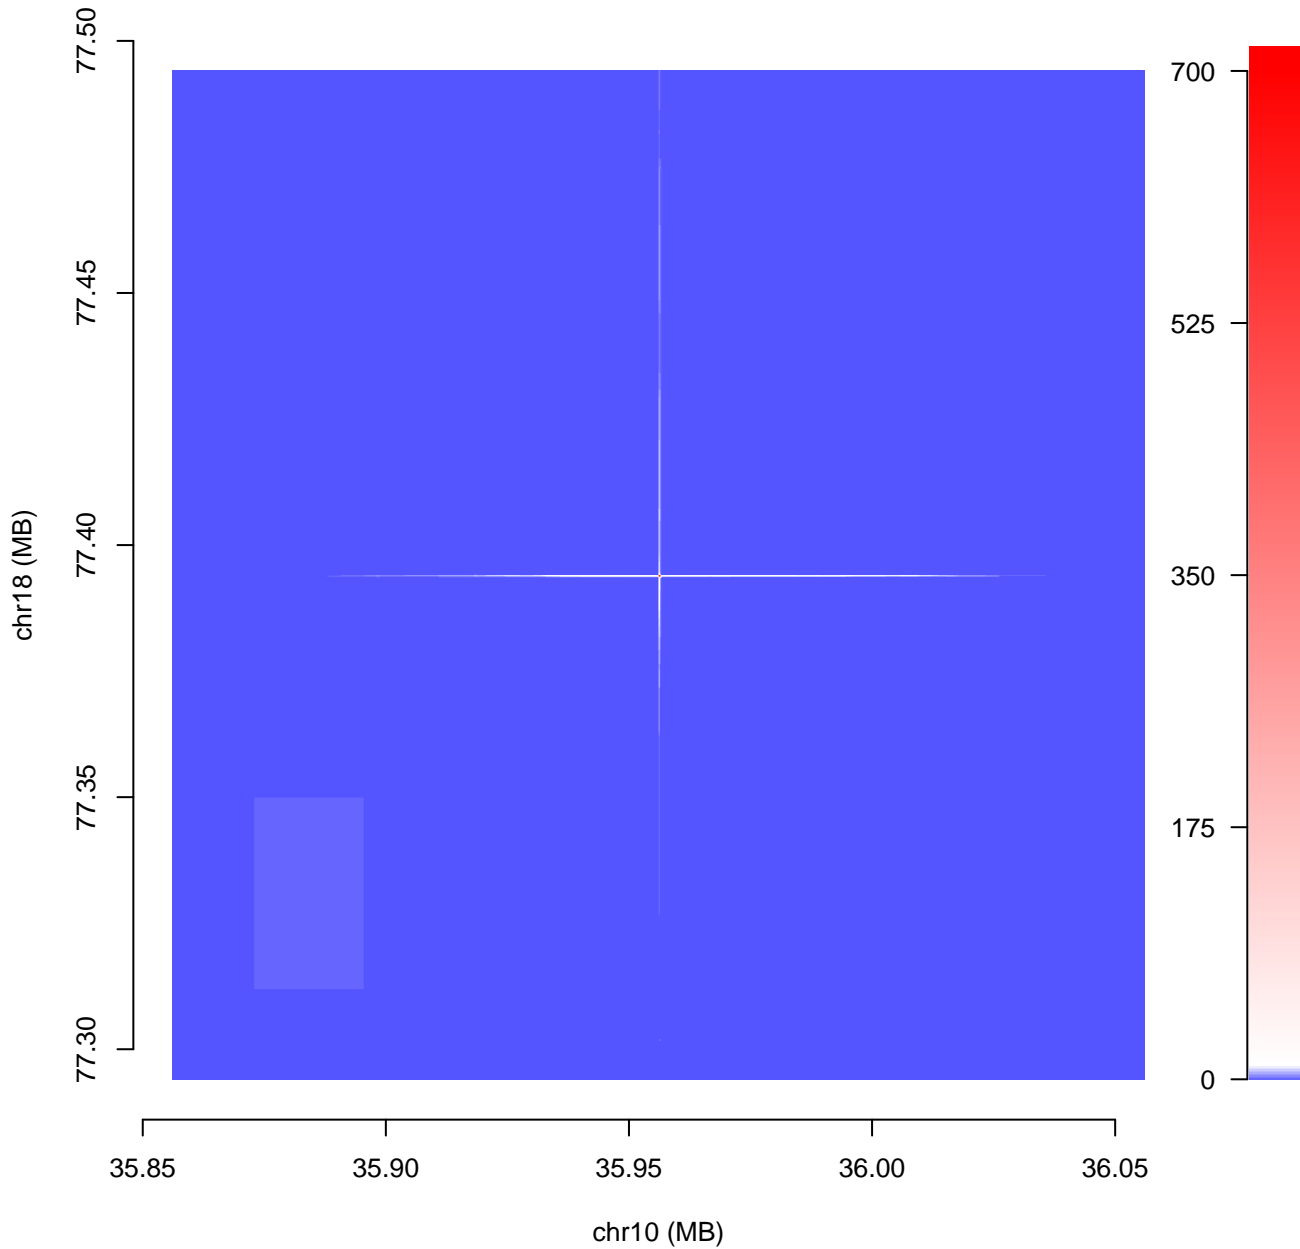

Supplement: Supplemental_Data.zip [file event_267.pdf › event_267.pdf]

Barcode

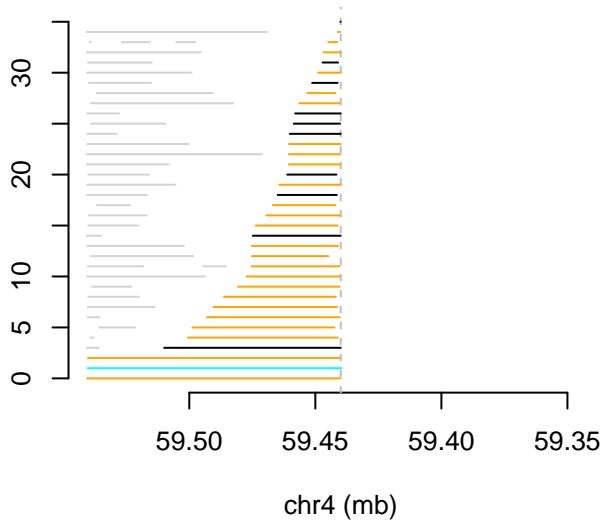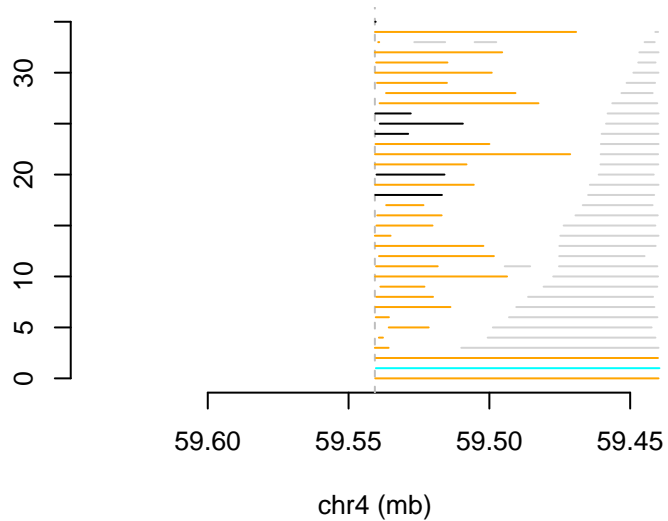

Copy number

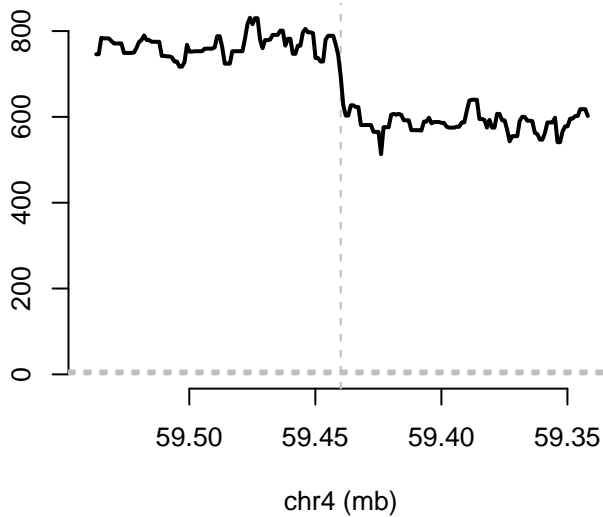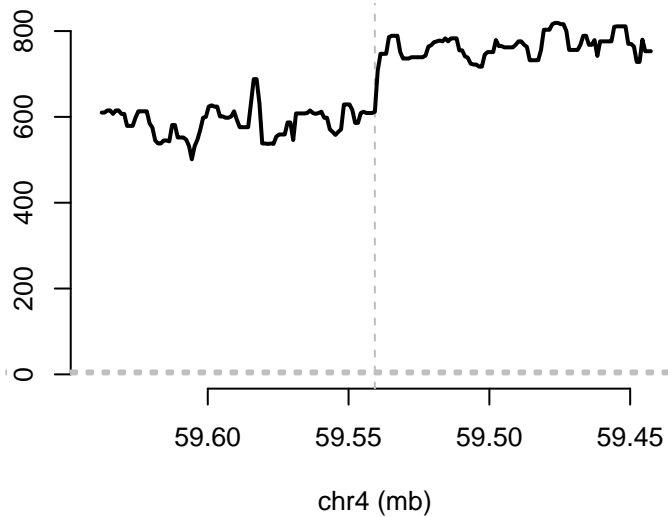

K562 chr4:59,439,926::chr4:59,540,659-+

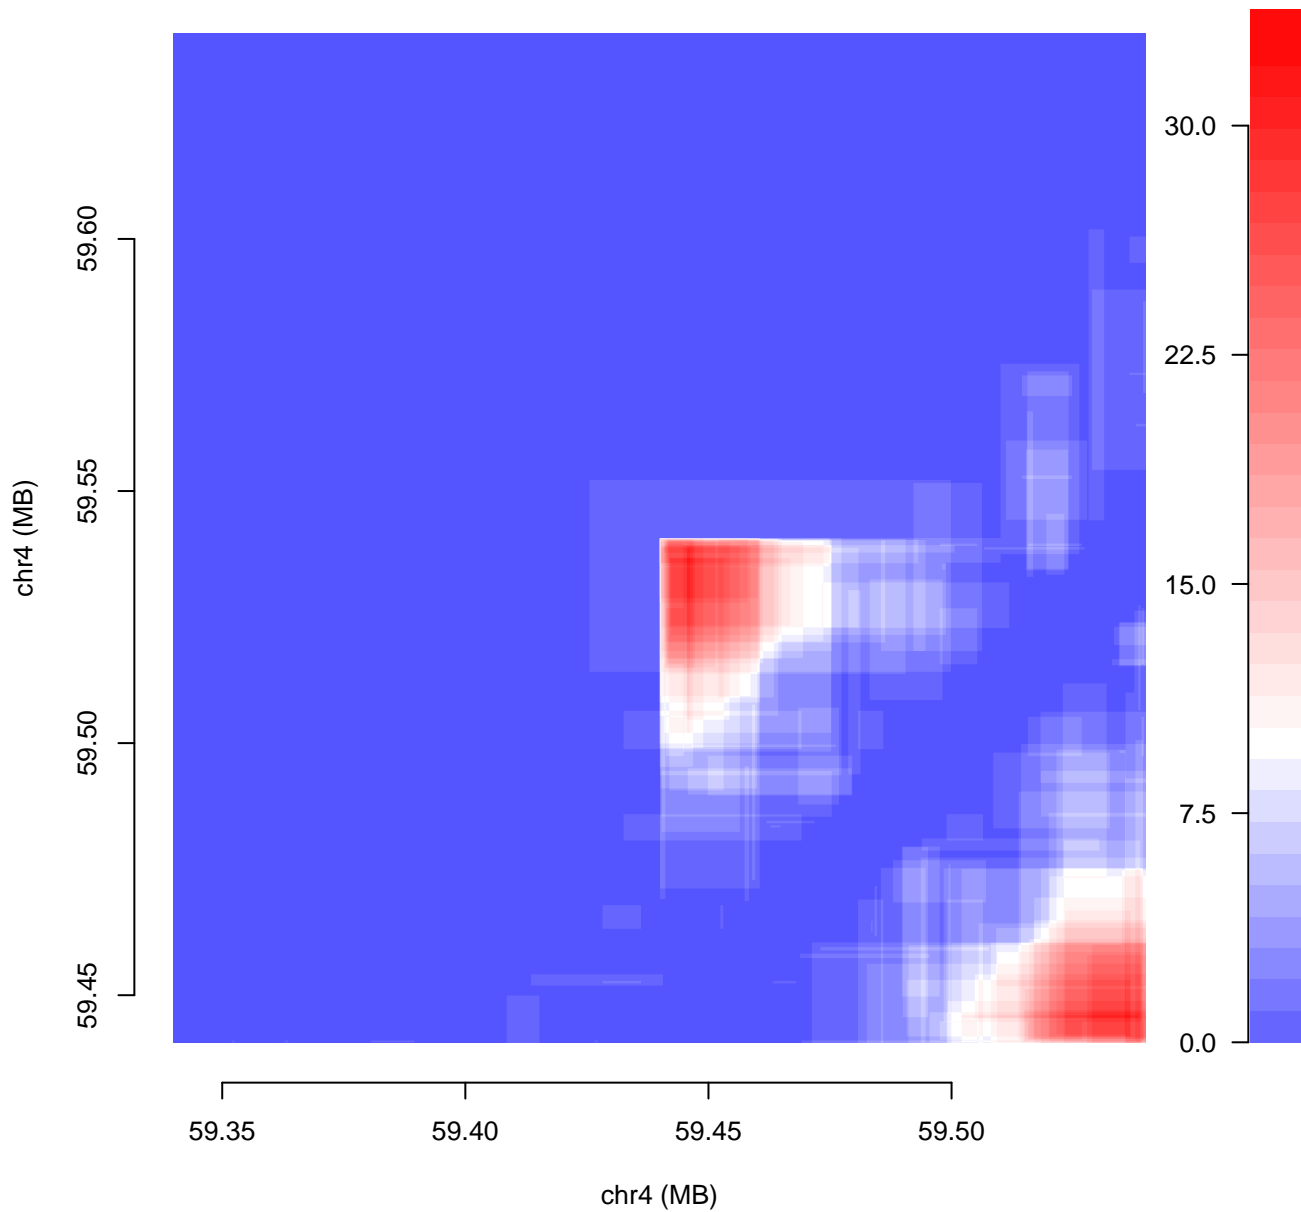

Supplement: Supplemental_Data.zip [file event_268.pdf › event_268.pdf]

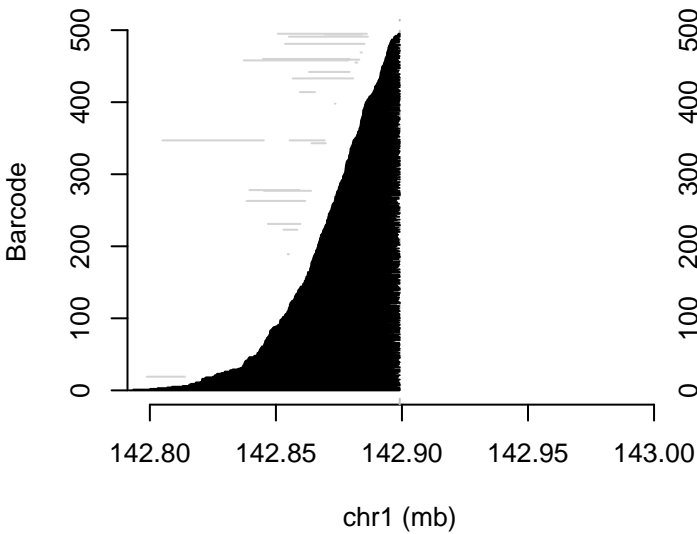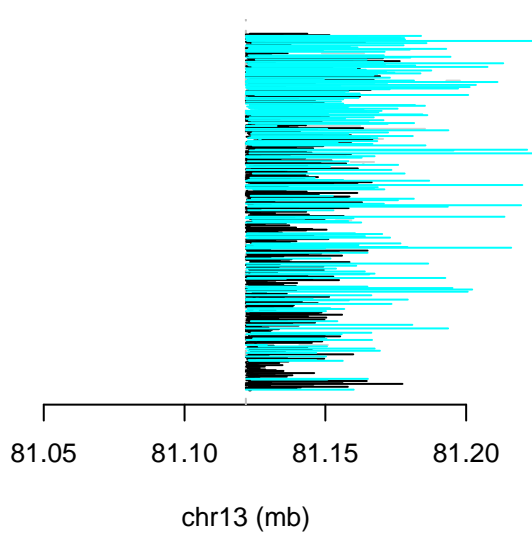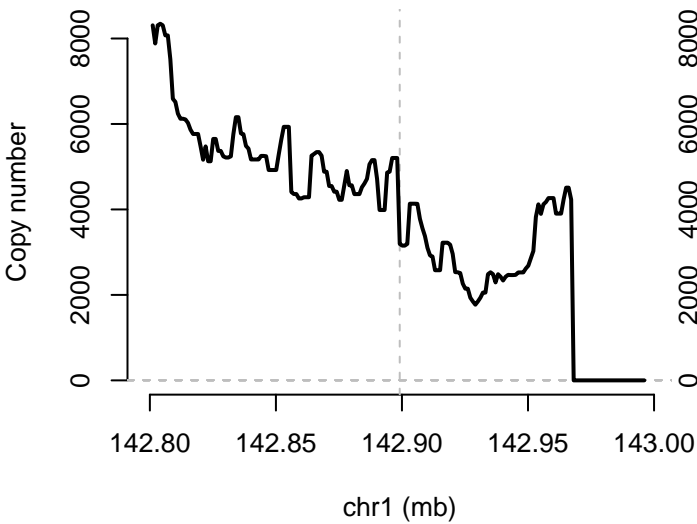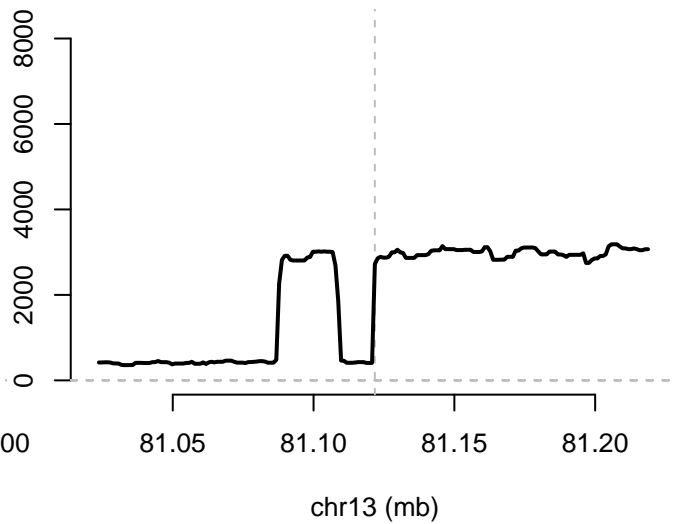

K562 chr1:142,899,123::chr13:81,121,774+-

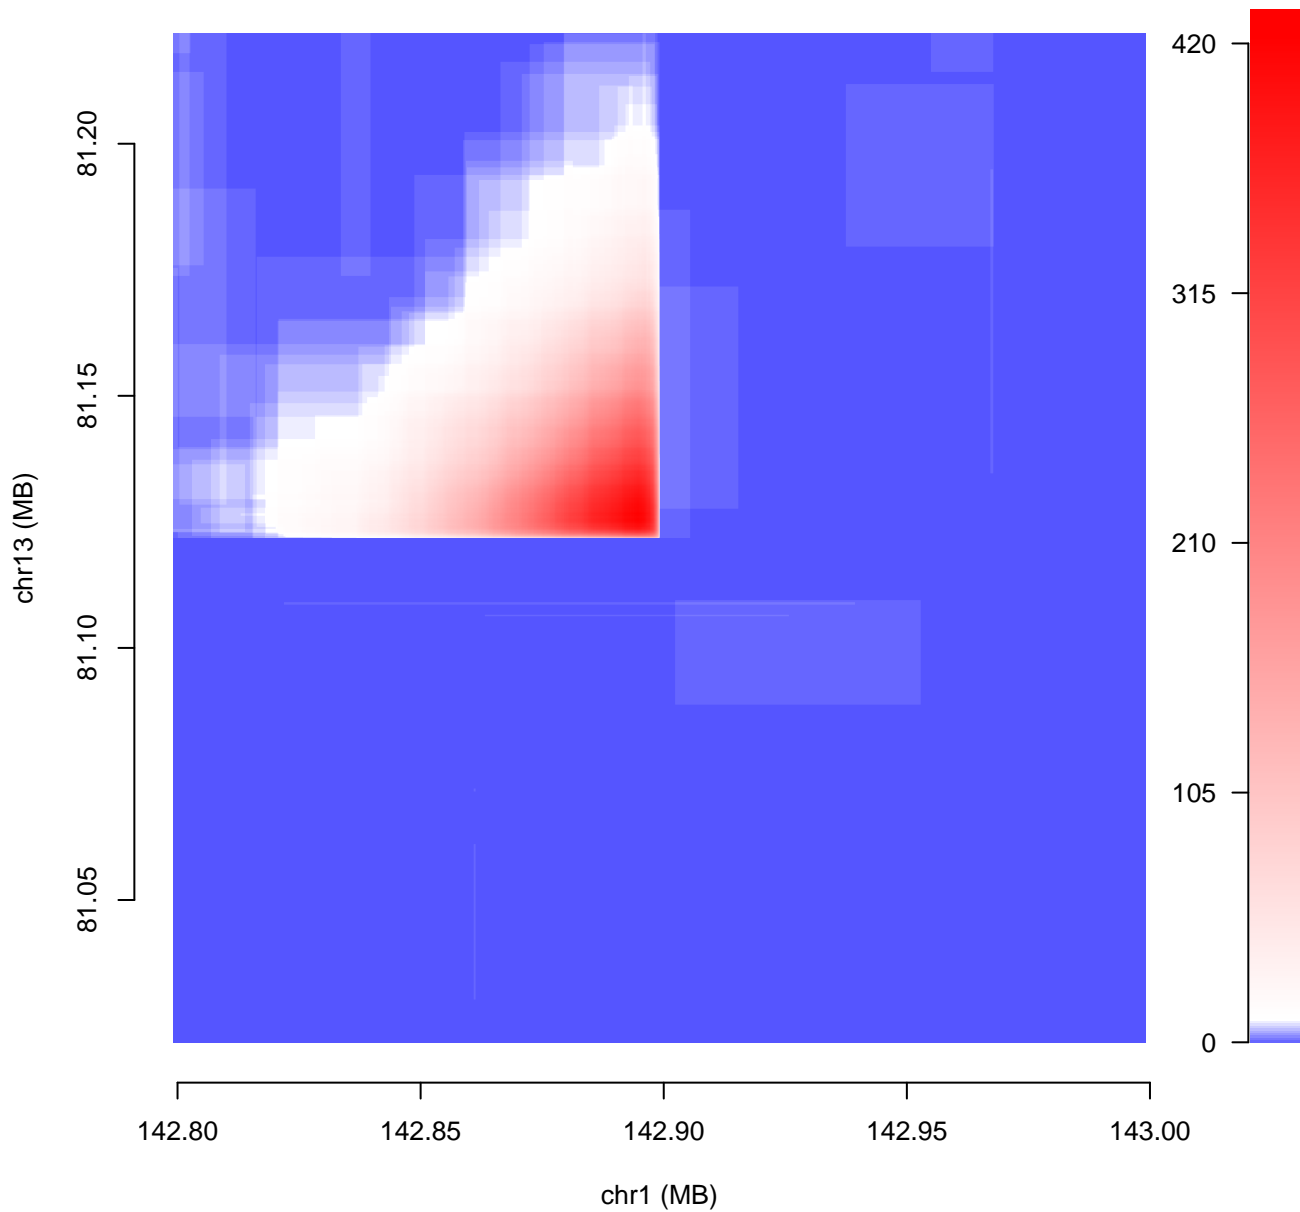

Supplement: Supplemental_Data.zip [file event_269.pdf › event_269.pdf]

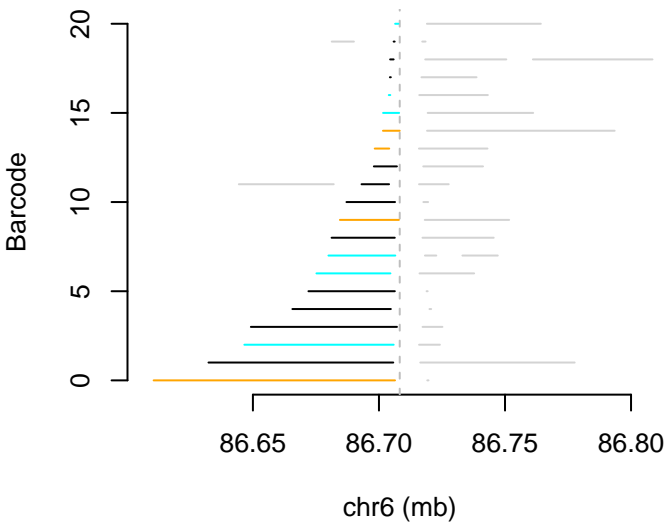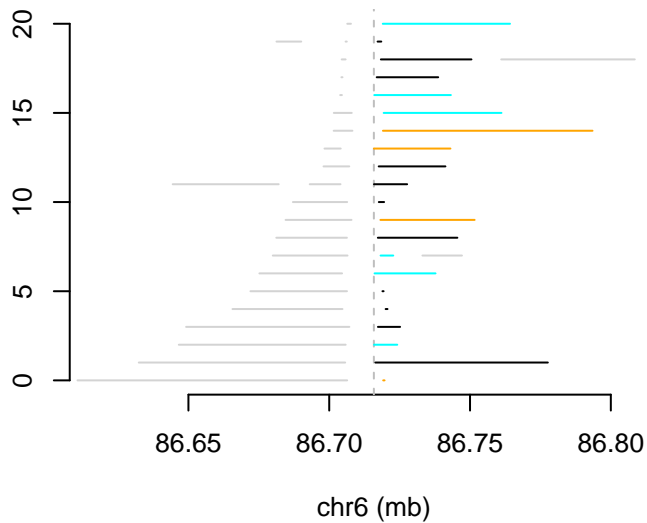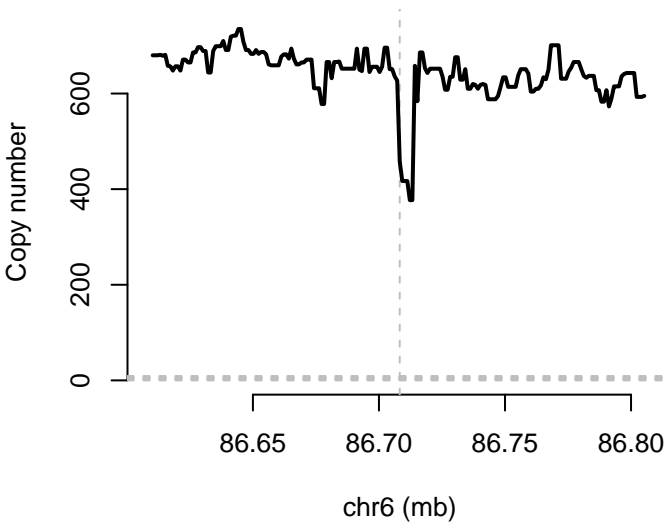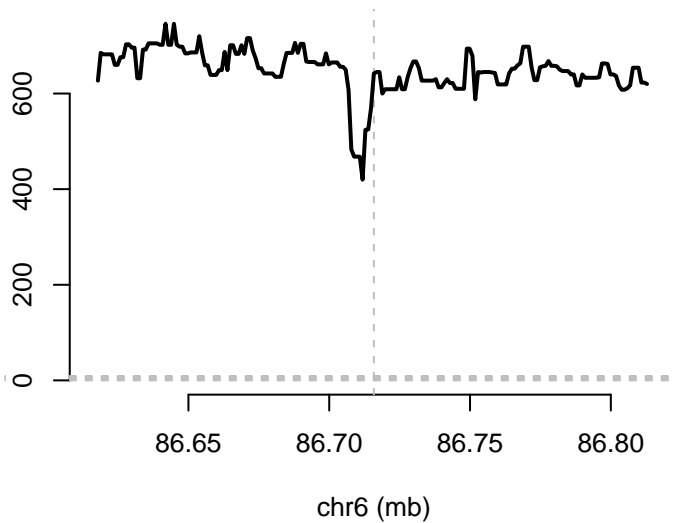

K562 chr6:86,715,855::chr6:86,708,243-+

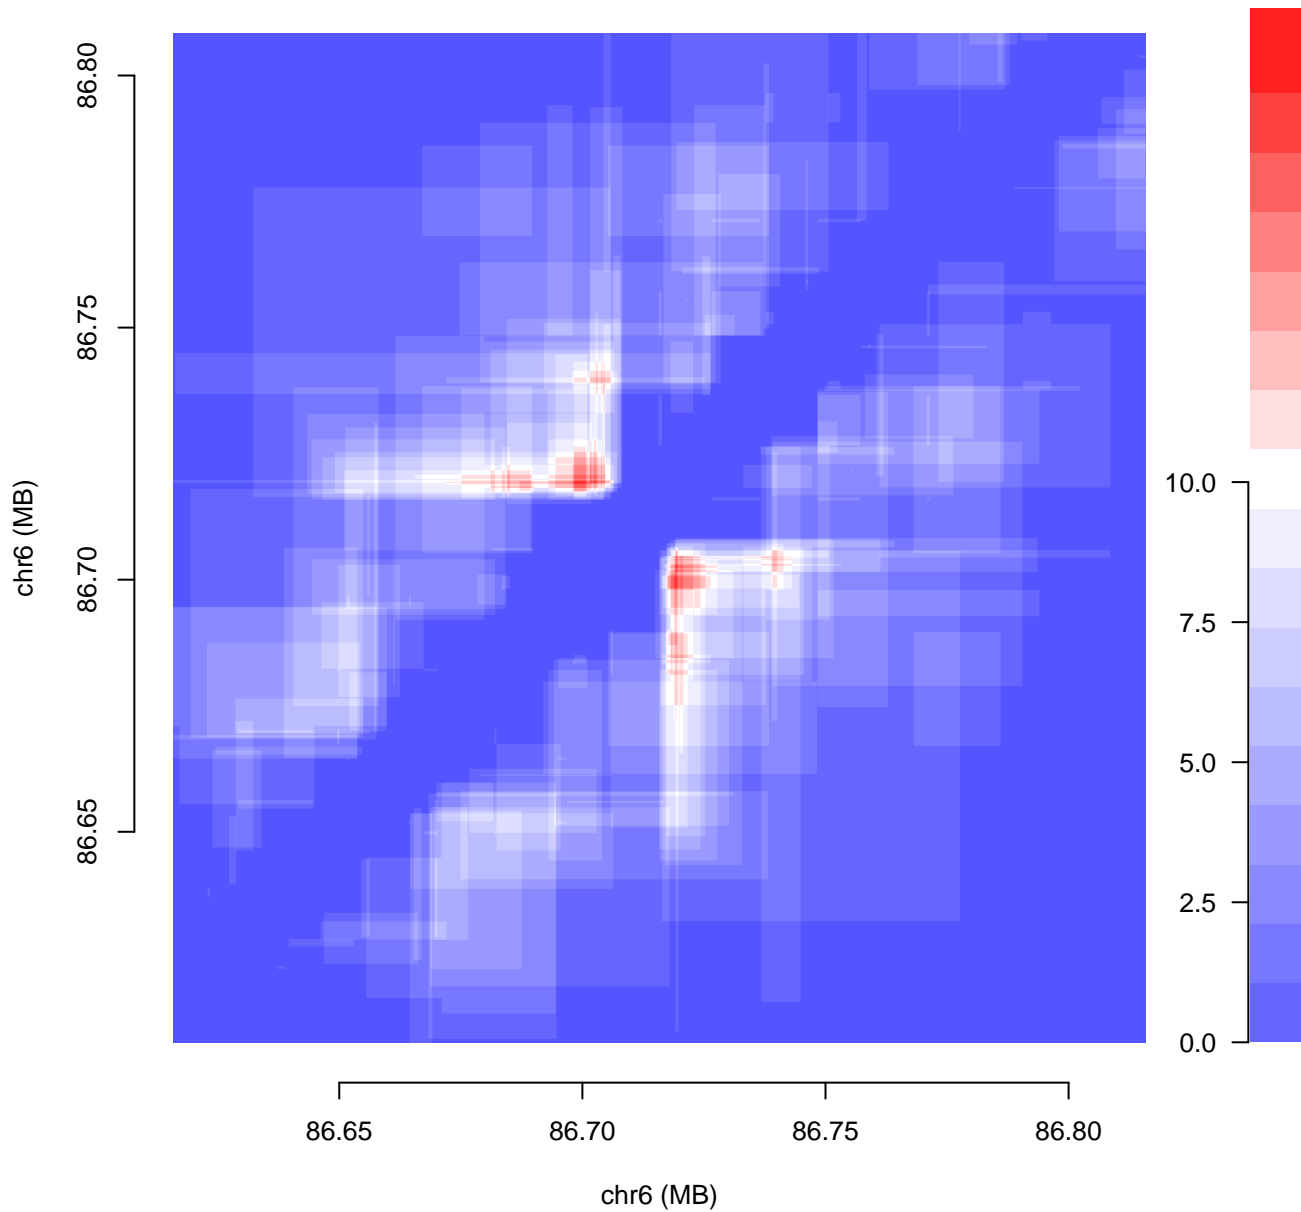

Supplement: Supplemental_Data.zip [file event_27.pdf › event_27.pdf]

Barcode

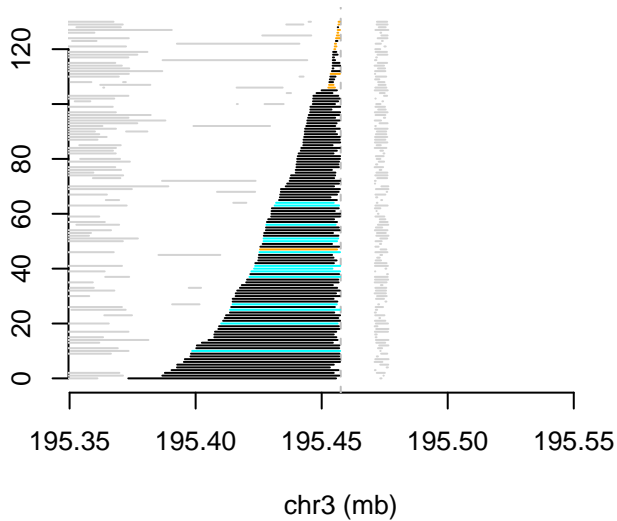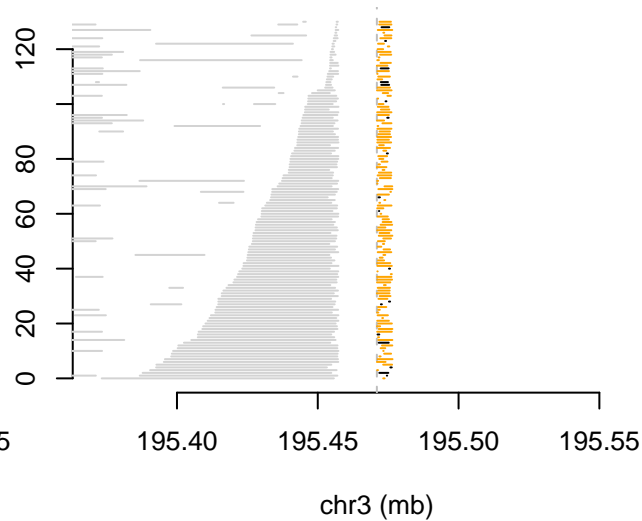

Copy number

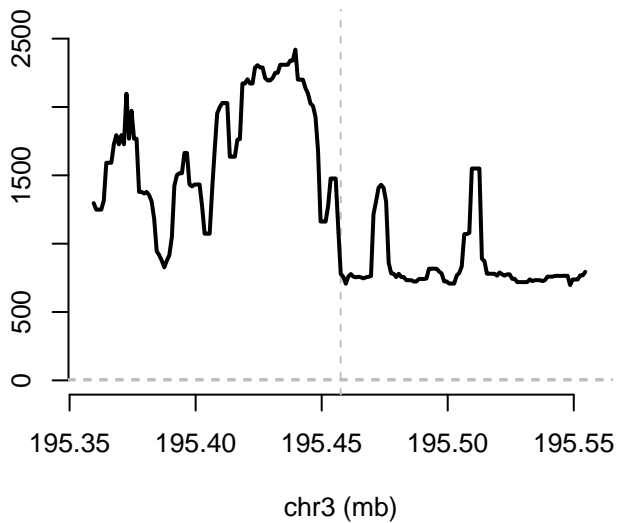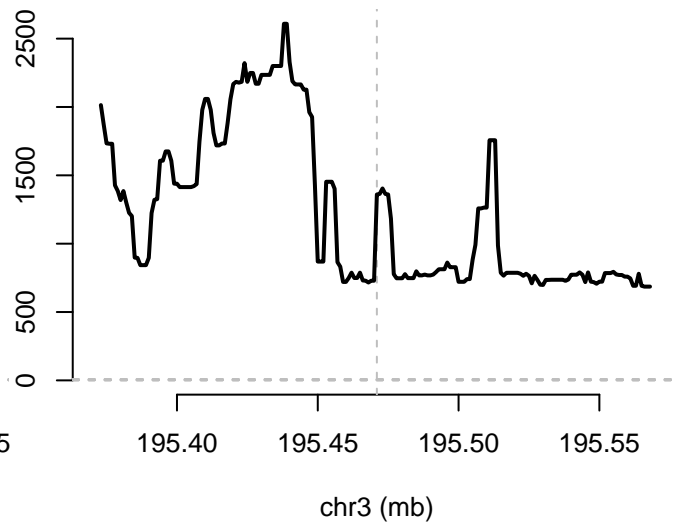

K562 chr3:195,457,560::chr3:195,470,983+-

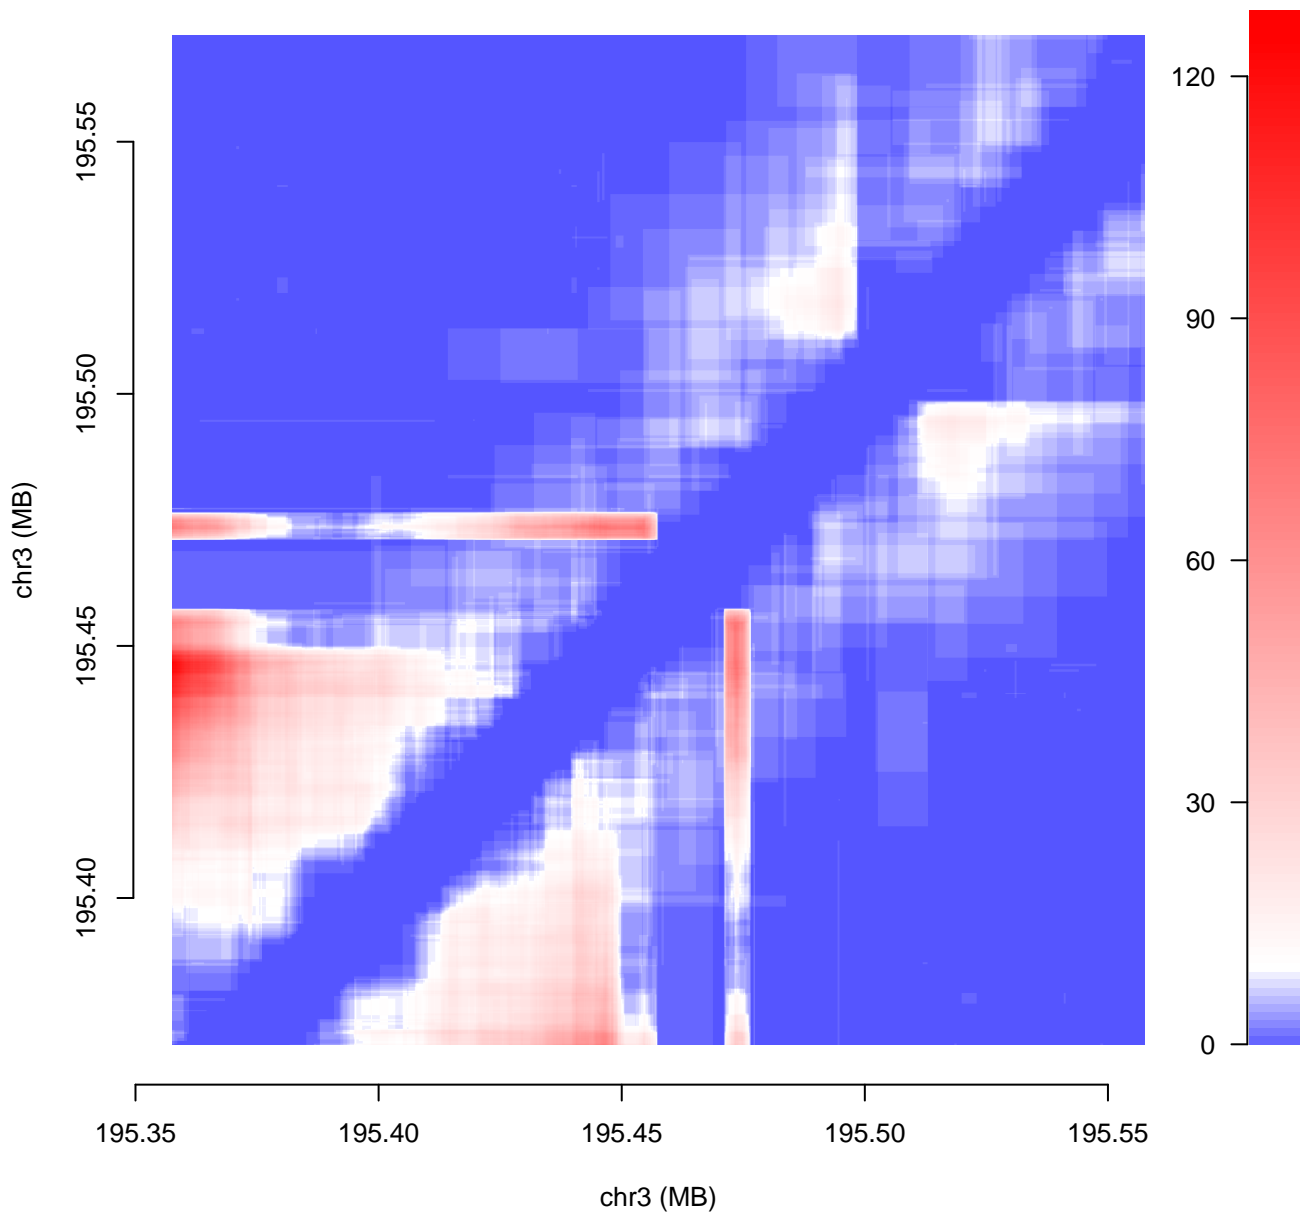

Supplement: Supplemental_Data.zip [file event_270.pdf › event_270.pdf]

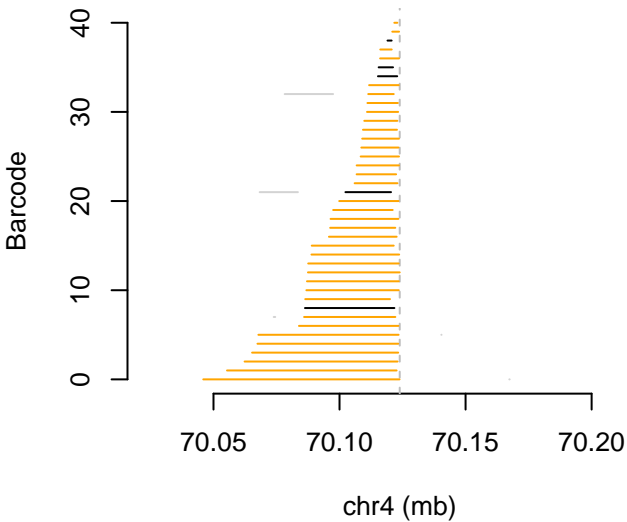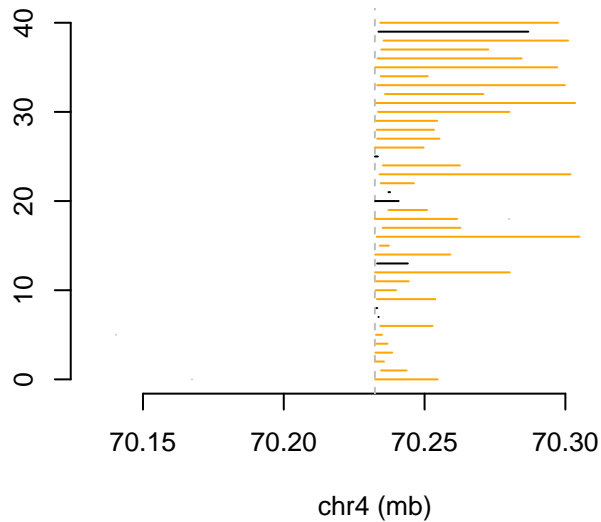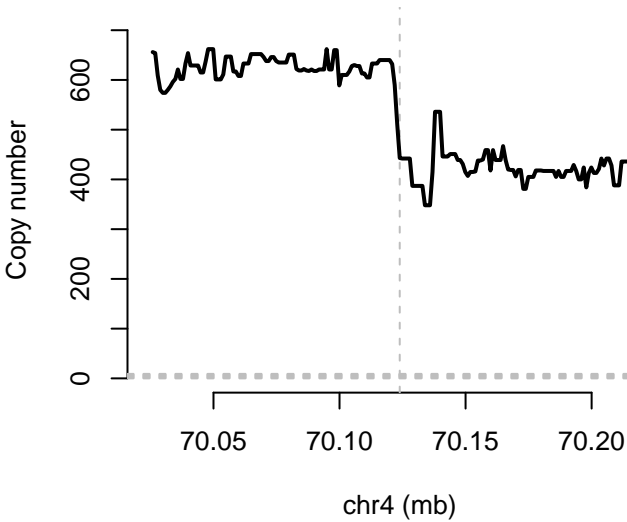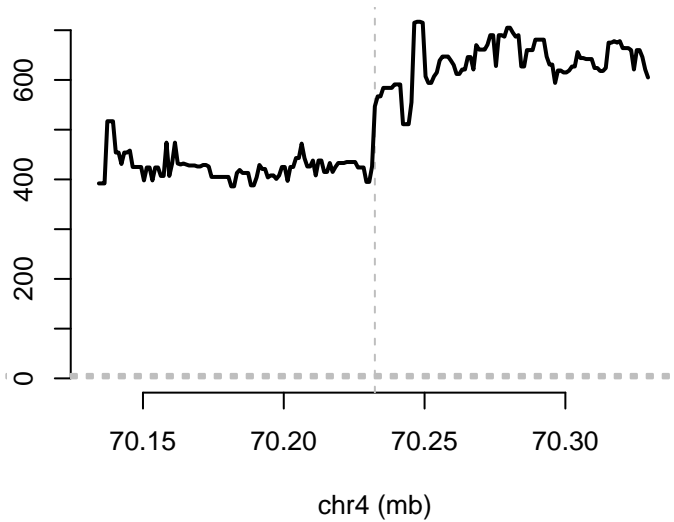

K562 chr4:70,123,886::chr4:70,232,353+-

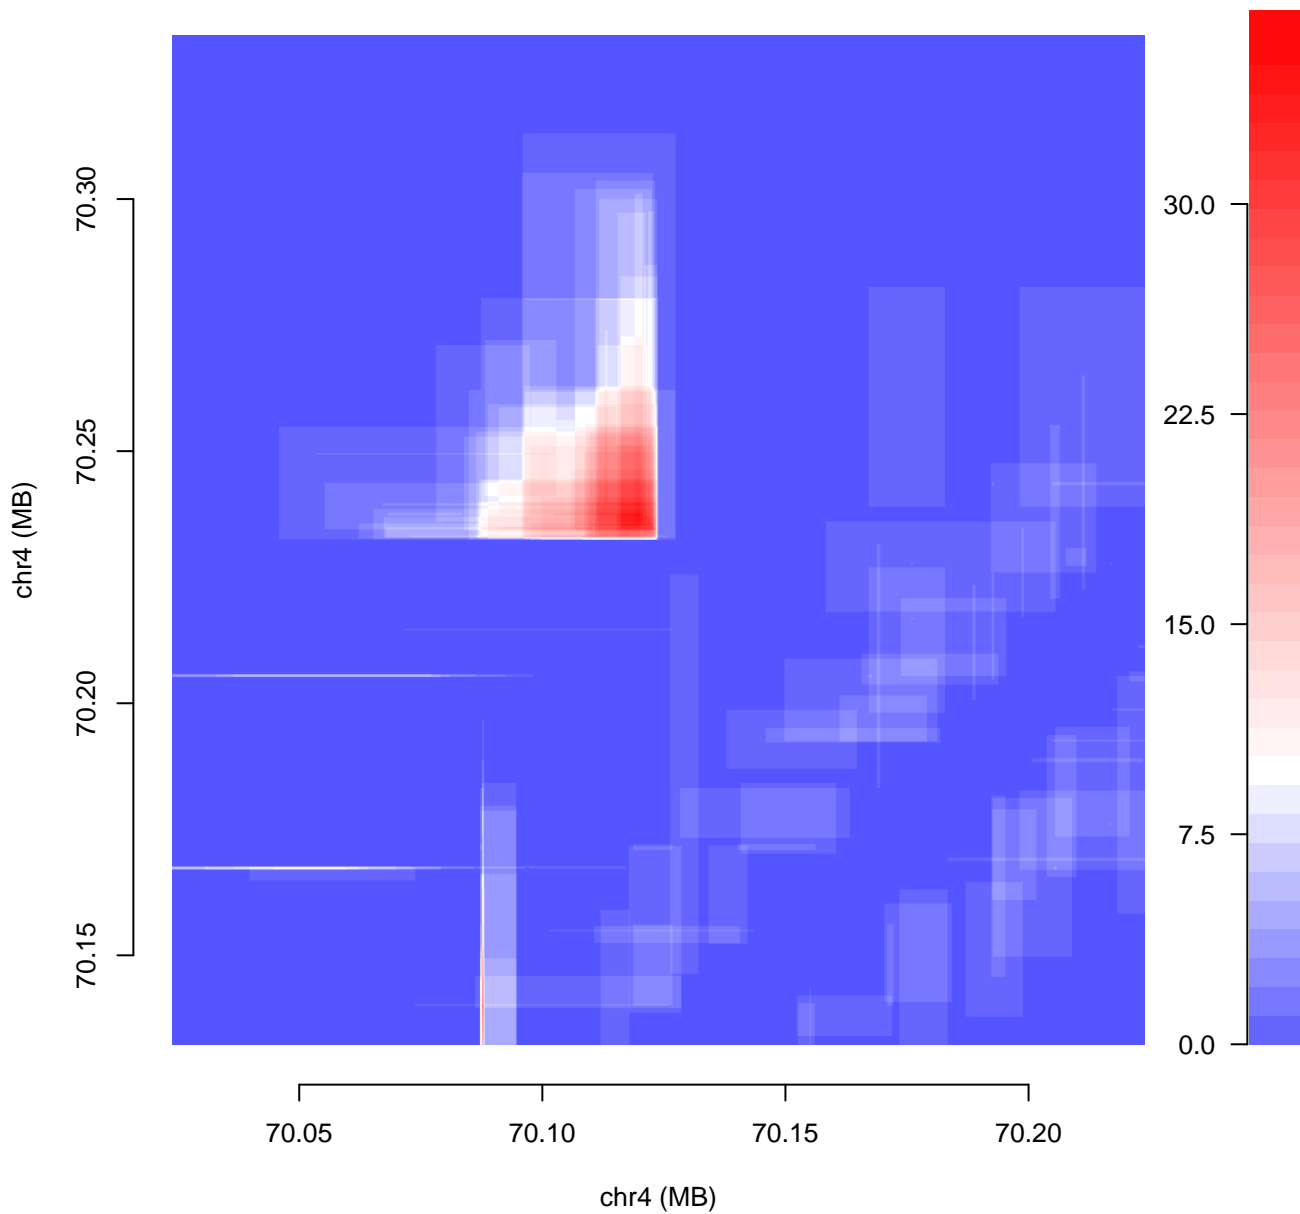

Supplement: Supplemental_Data.zip [file event_271.pdf › event_271.pdf]

Barcode

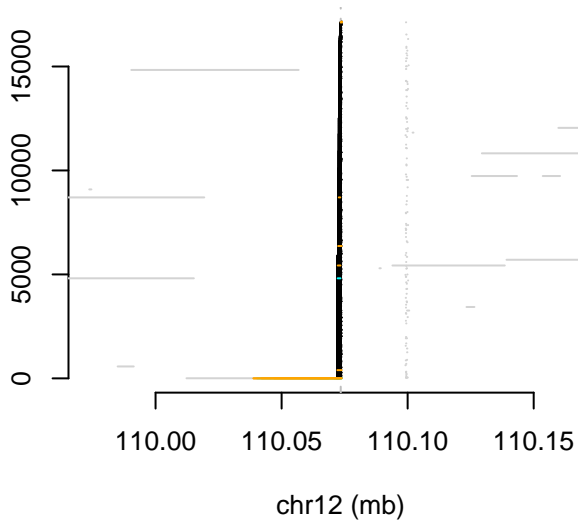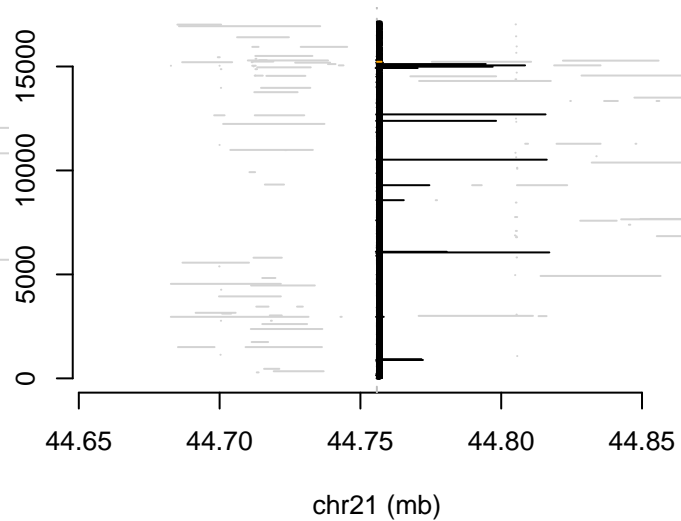

Copy number

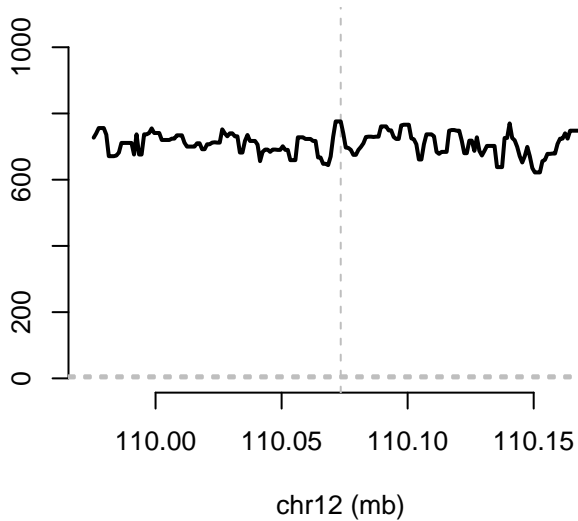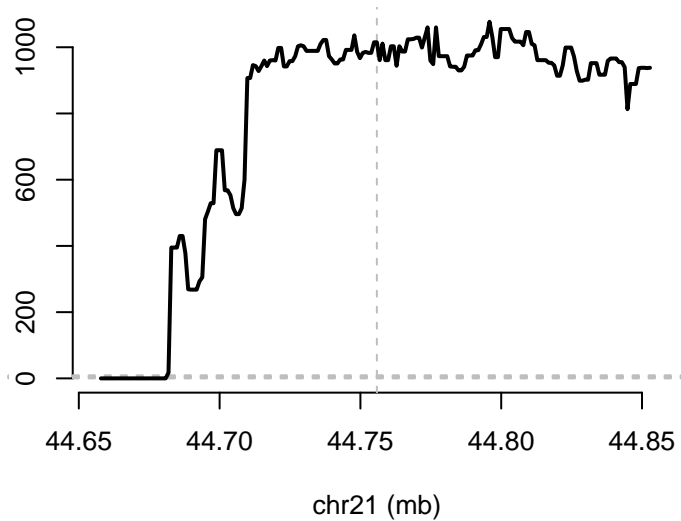

K562 chr12:110,073,460::chr21:44,755,844+-

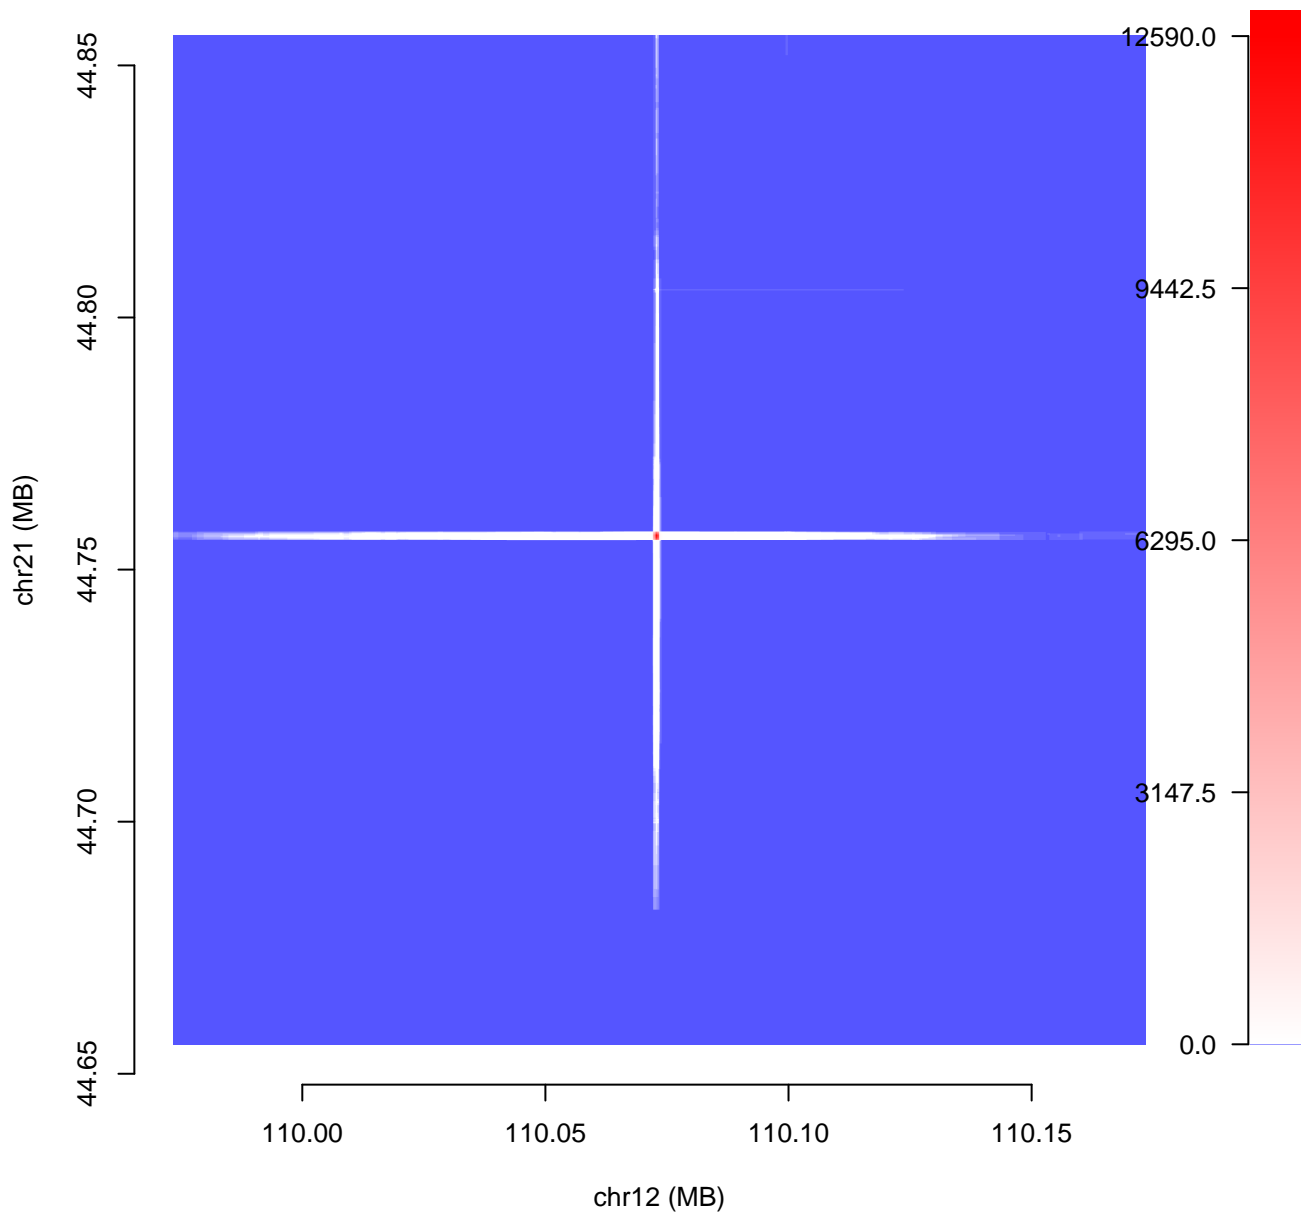

Supplement: Supplemental_Data.zip [file event_272.pdf › event_272.pdf]

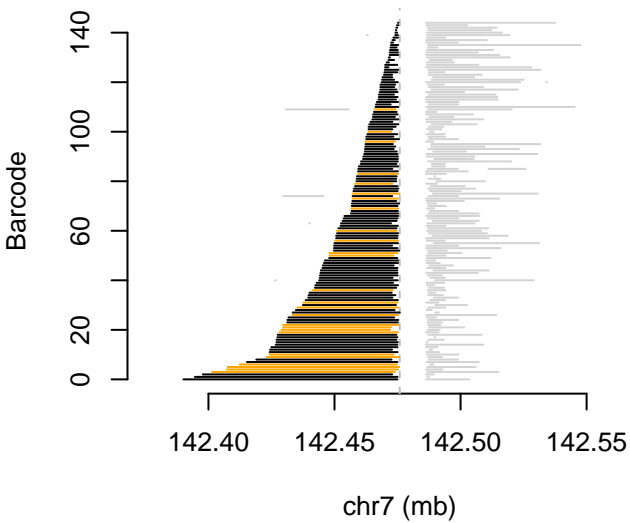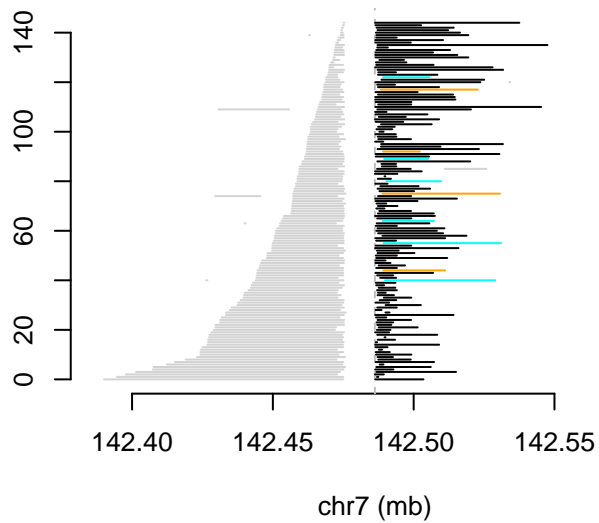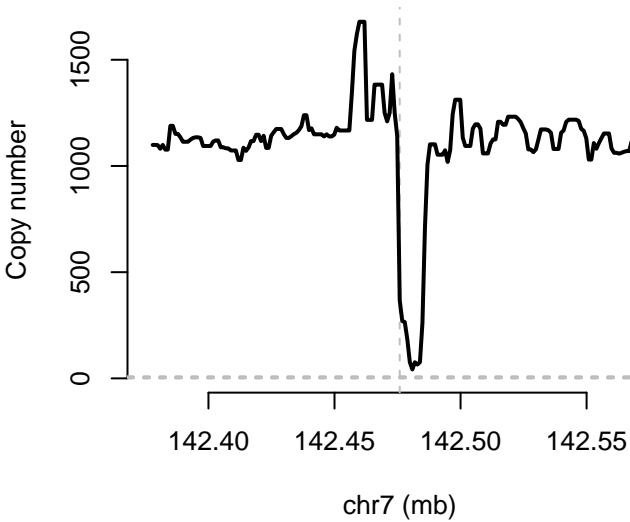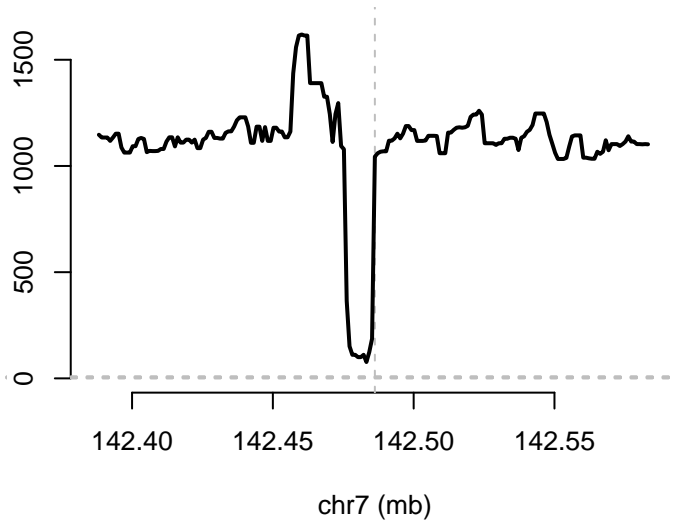

K562 chr7:142,475,878::chr7:142,486,224+-

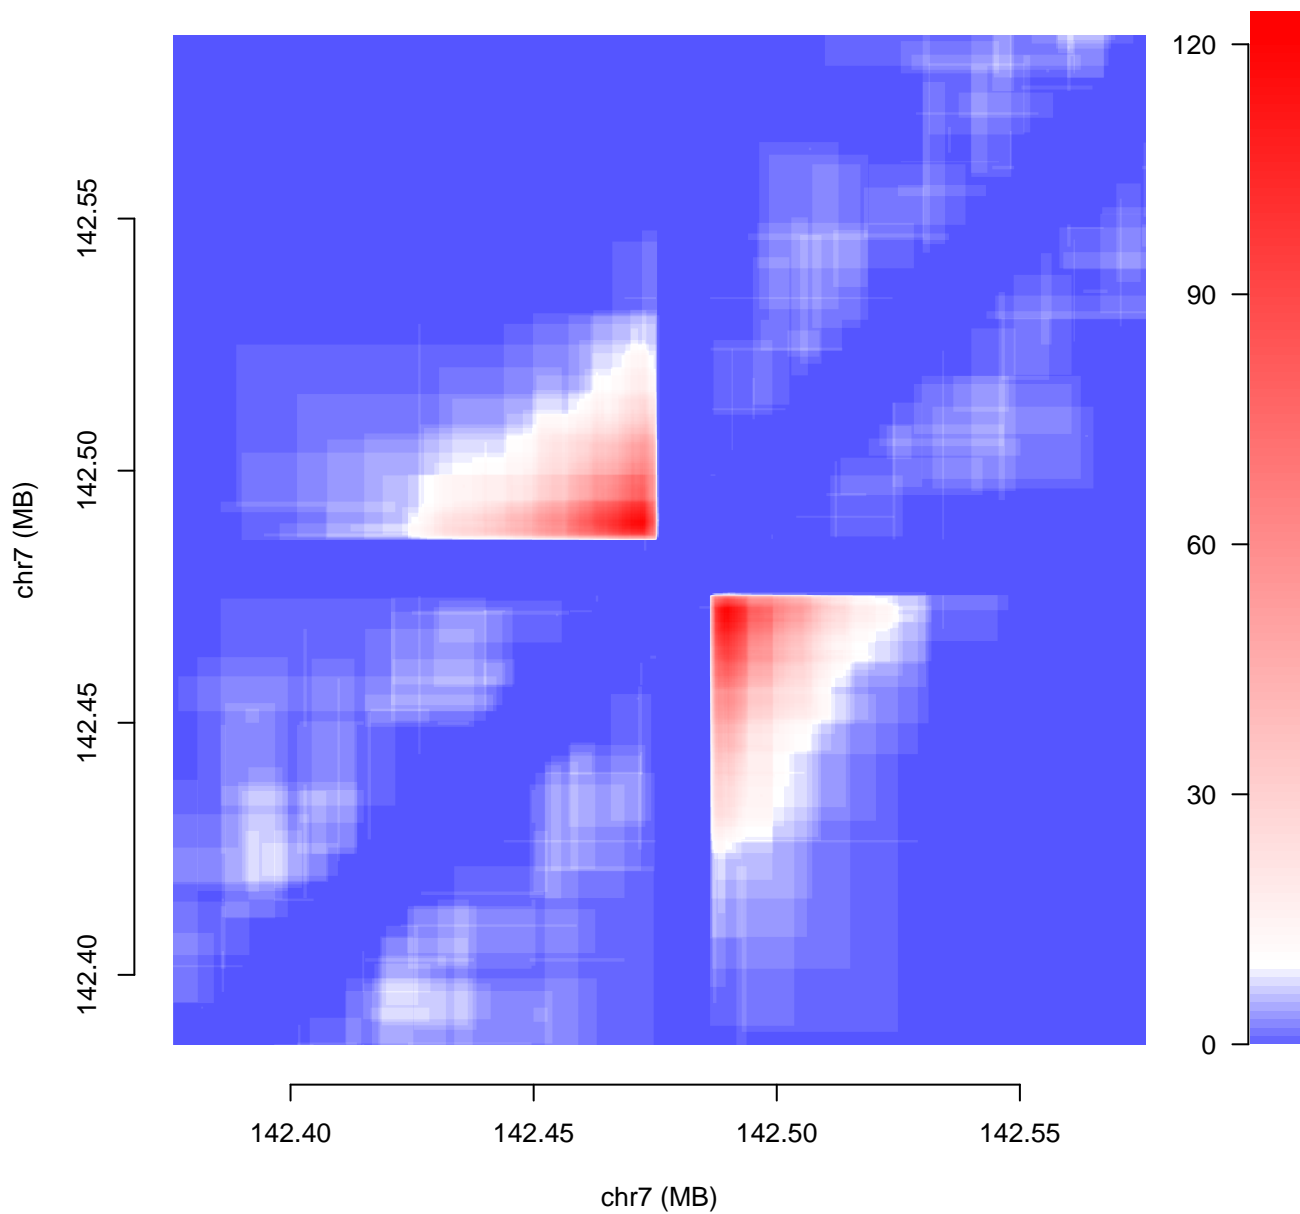

Supplement: Supplemental_Data.zip [file event_273.pdf › event_273.pdf]

Barcode

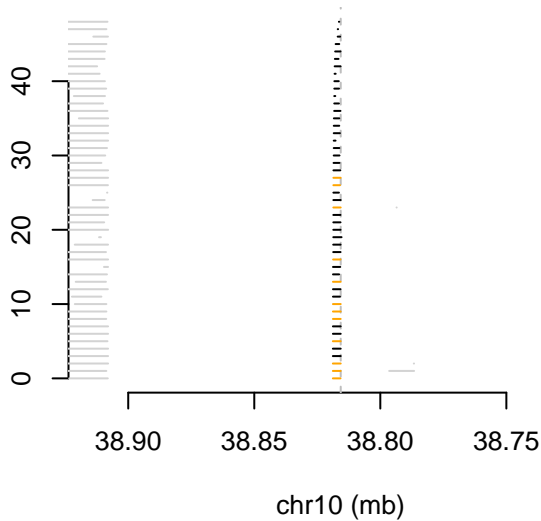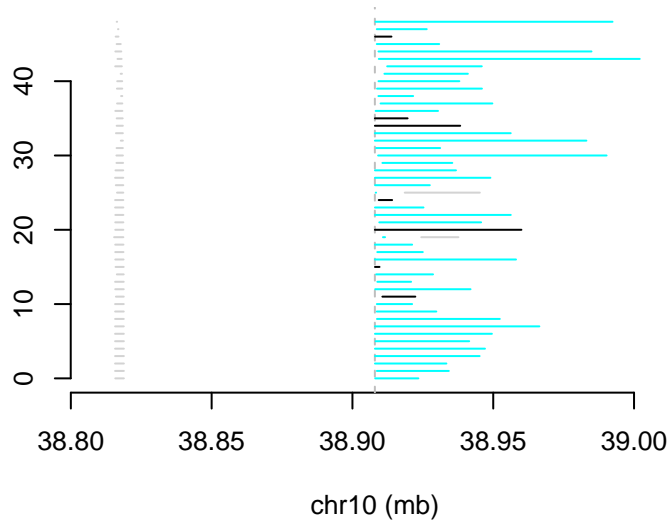

Copy number

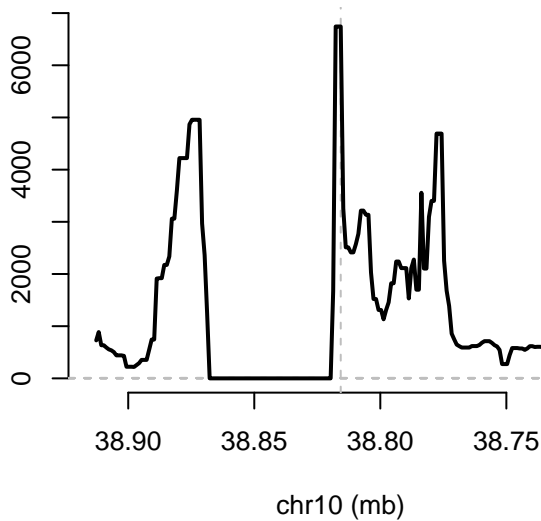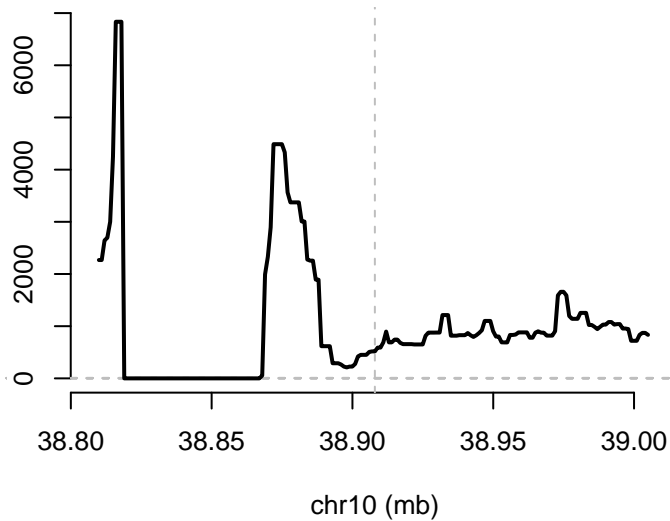

K562 chr10:38,907,966::chr10:38,815,697--

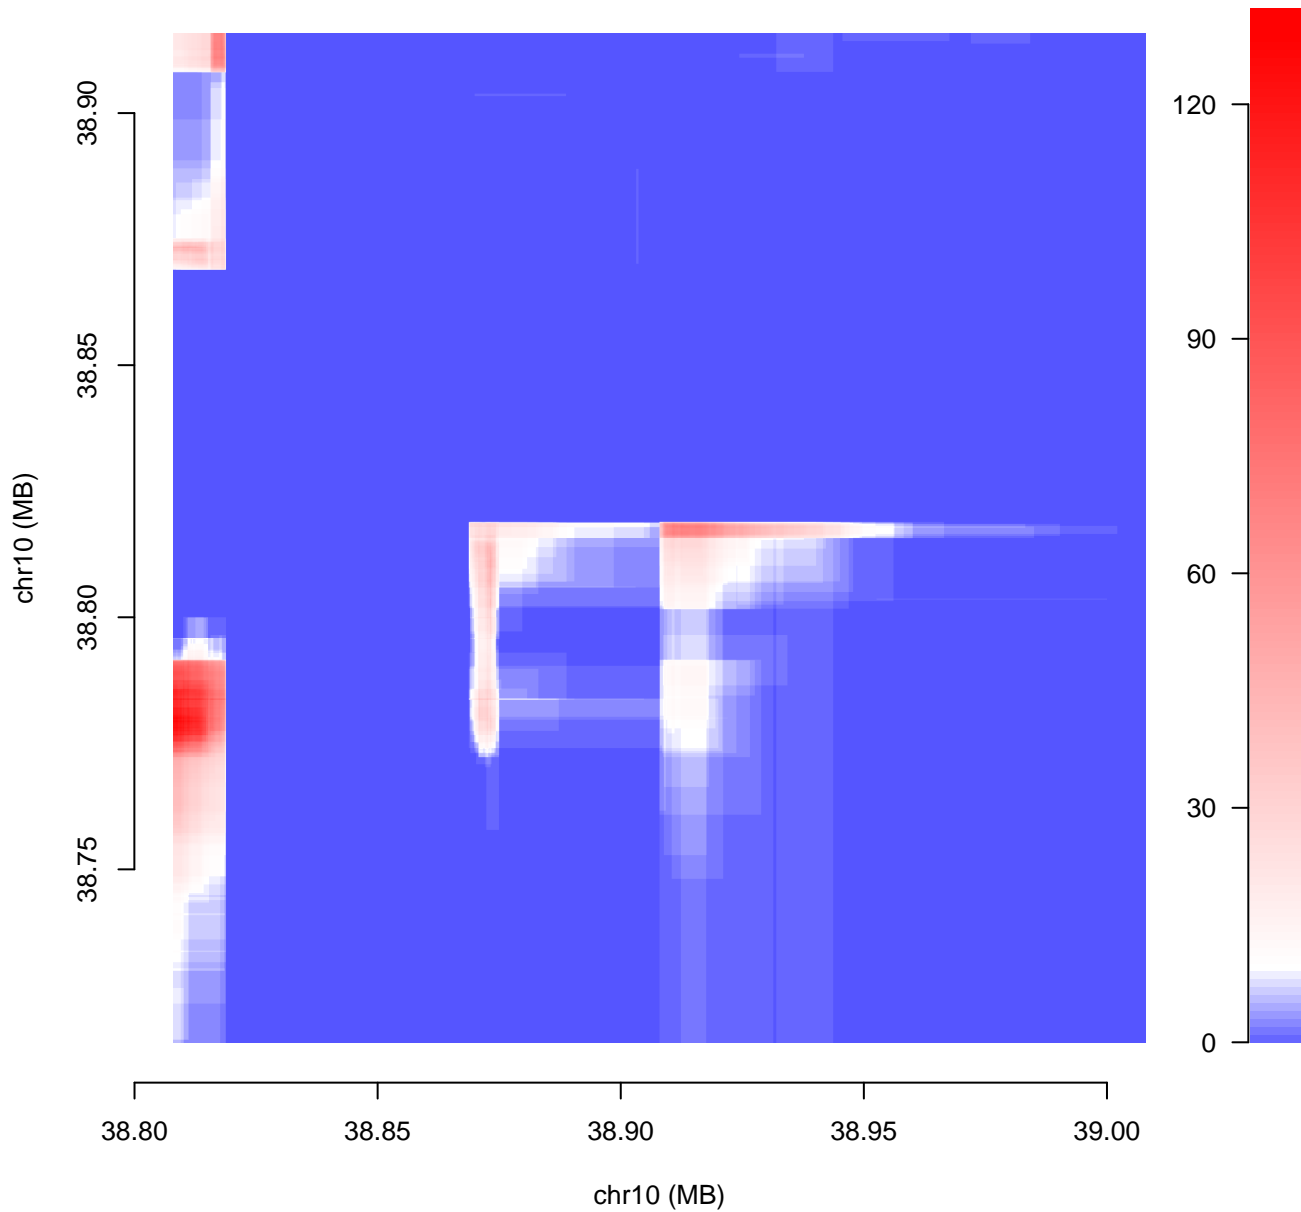

Supplement: Supplemental_Data.zip [file event_274.pdf › event_274.pdf]

Barcode

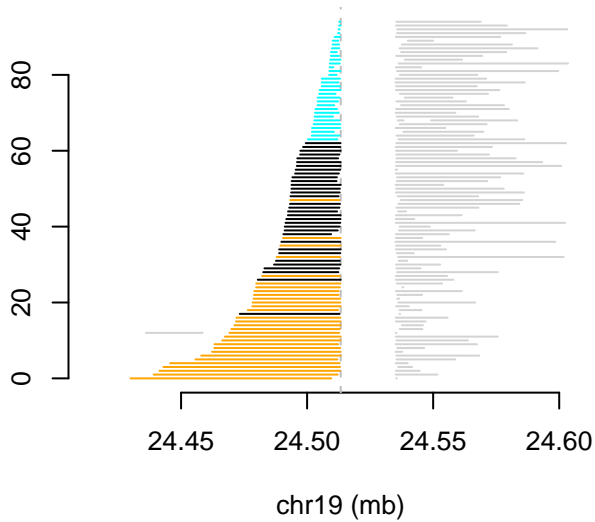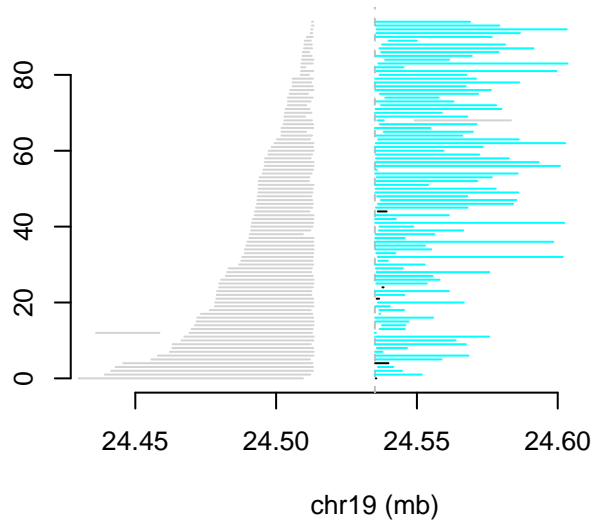

Copy number

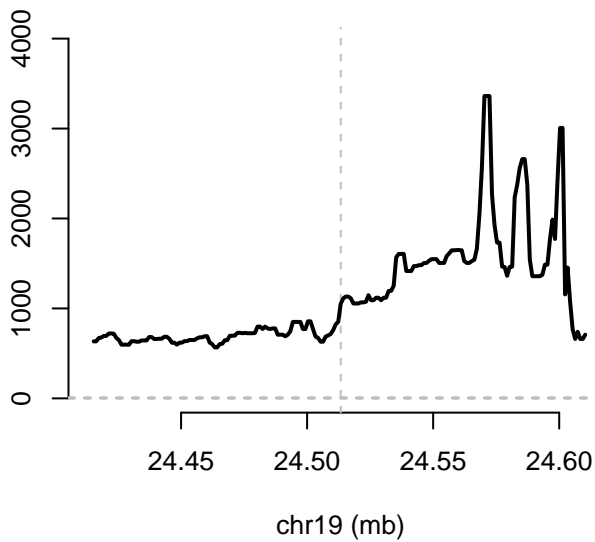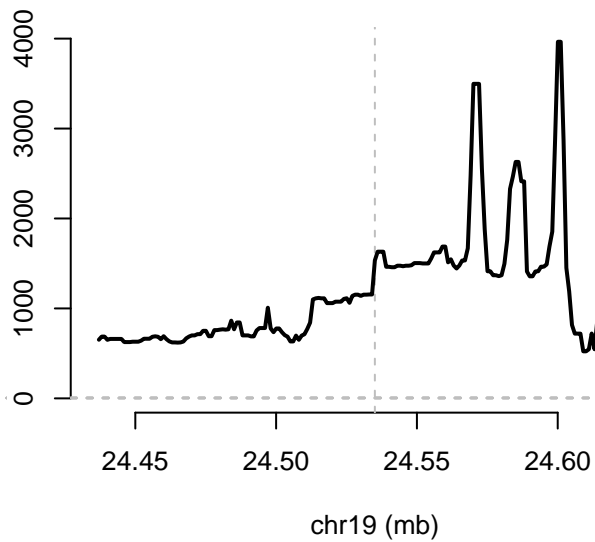

K562 chr19:24,535,066::chr19:24,513,339-+

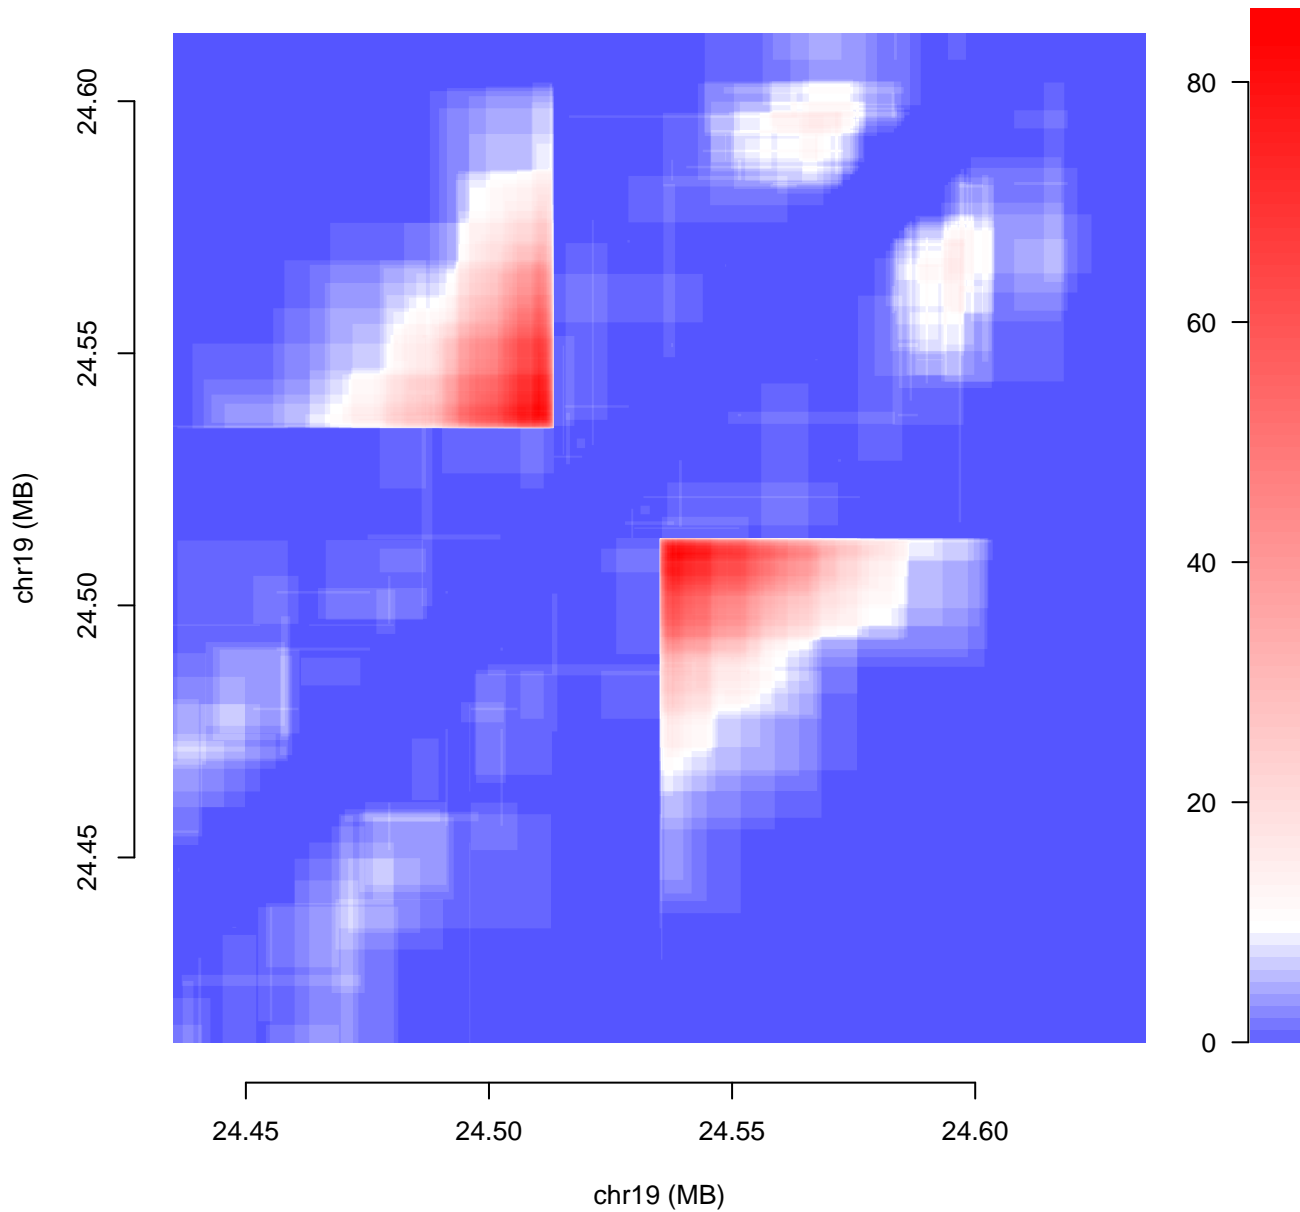

Supplement: Supplemental_Data.zip [file event_275.pdf › event_275.pdf]

Barcode

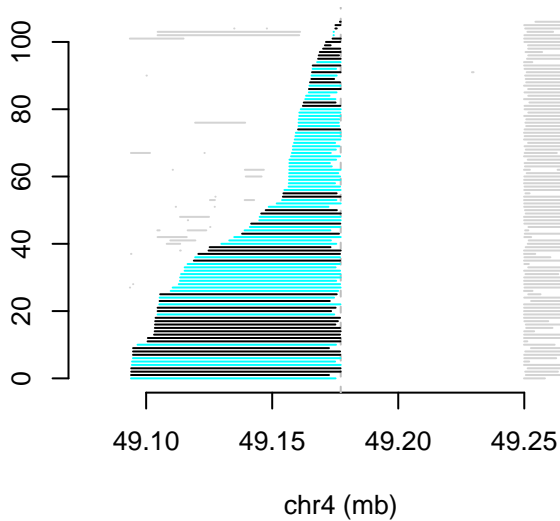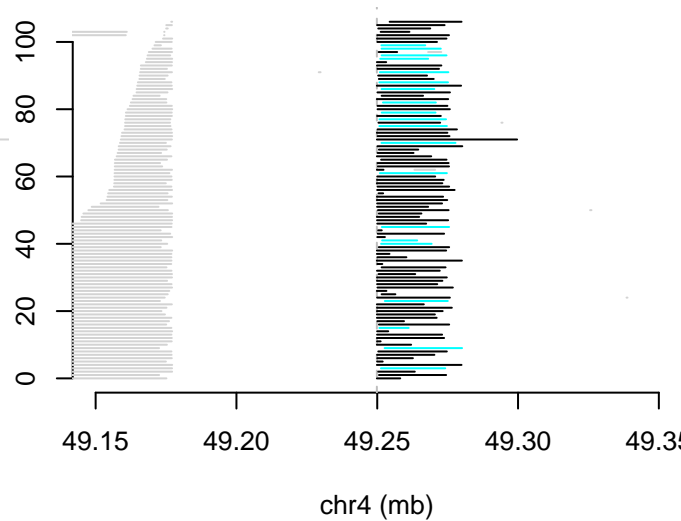

Copy number

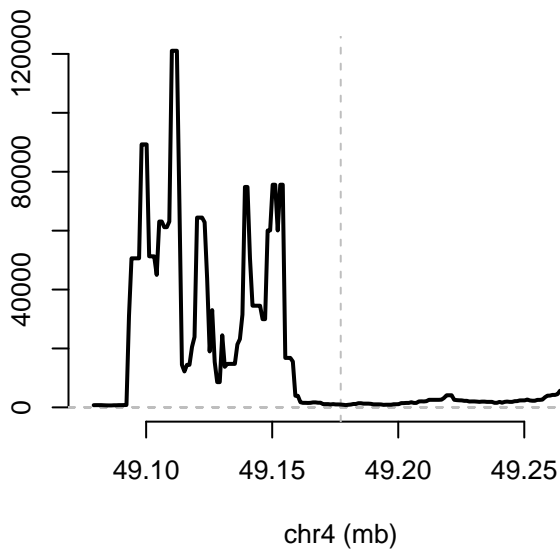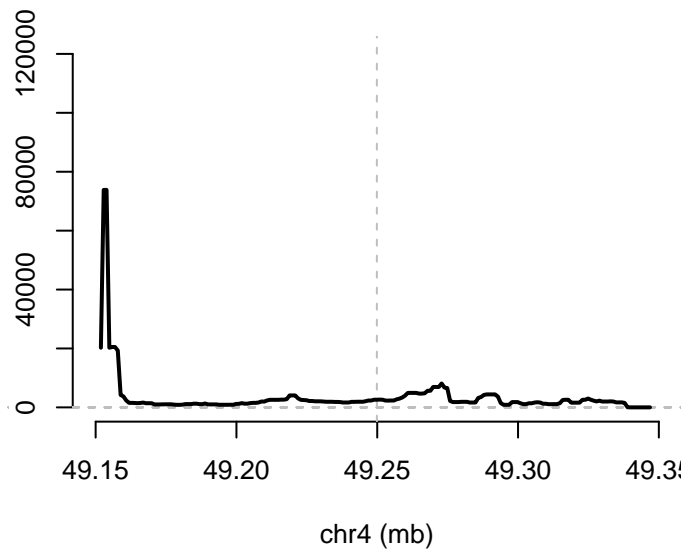

K562 chr4:49,177,189::chr4:49,249,874+-

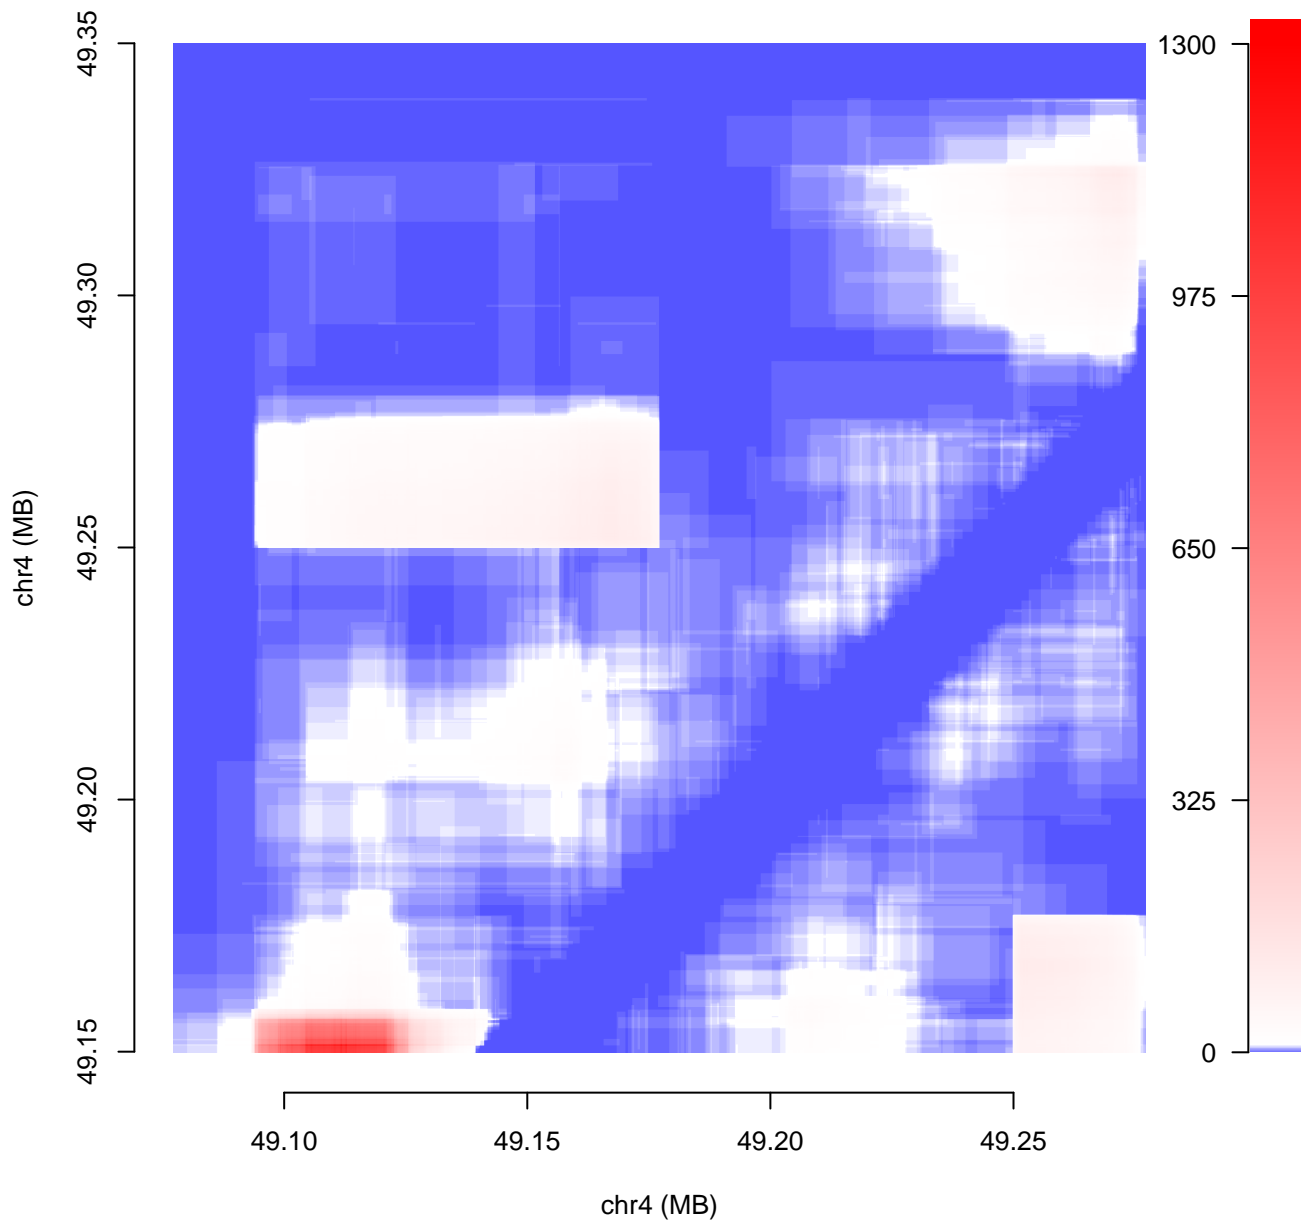

Supplement: Supplemental_Data.zip [file event_276.pdf › event_276.pdf]

Barcode

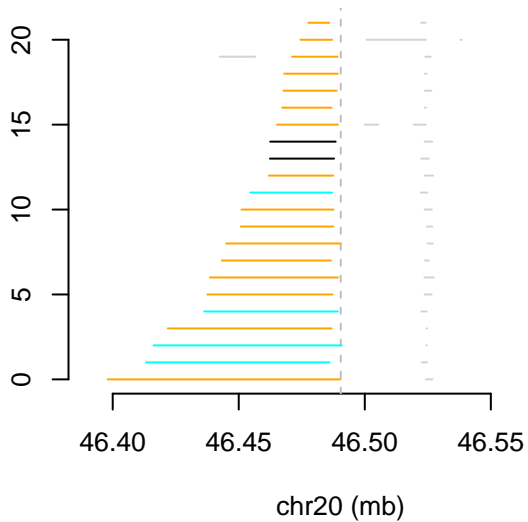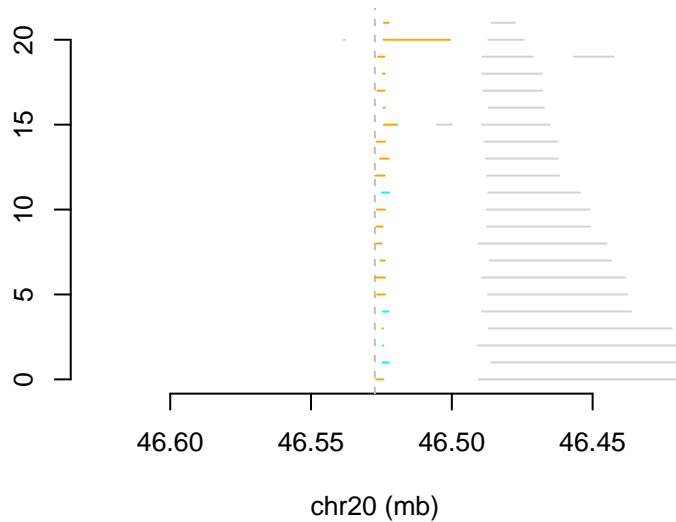

Copy number

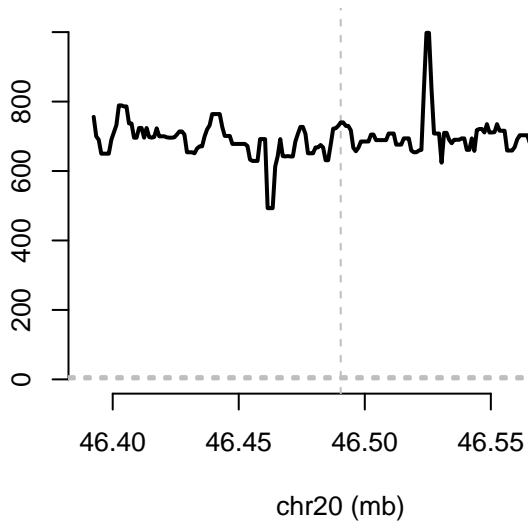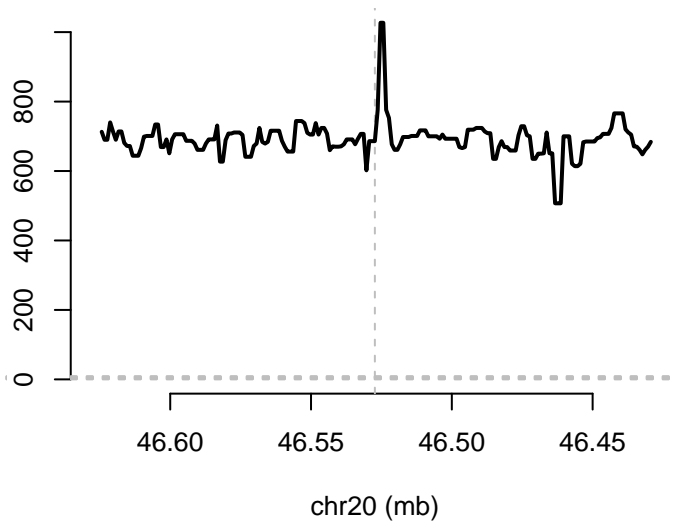

K562 chr20:46,527,325::chr20:46,490,461++

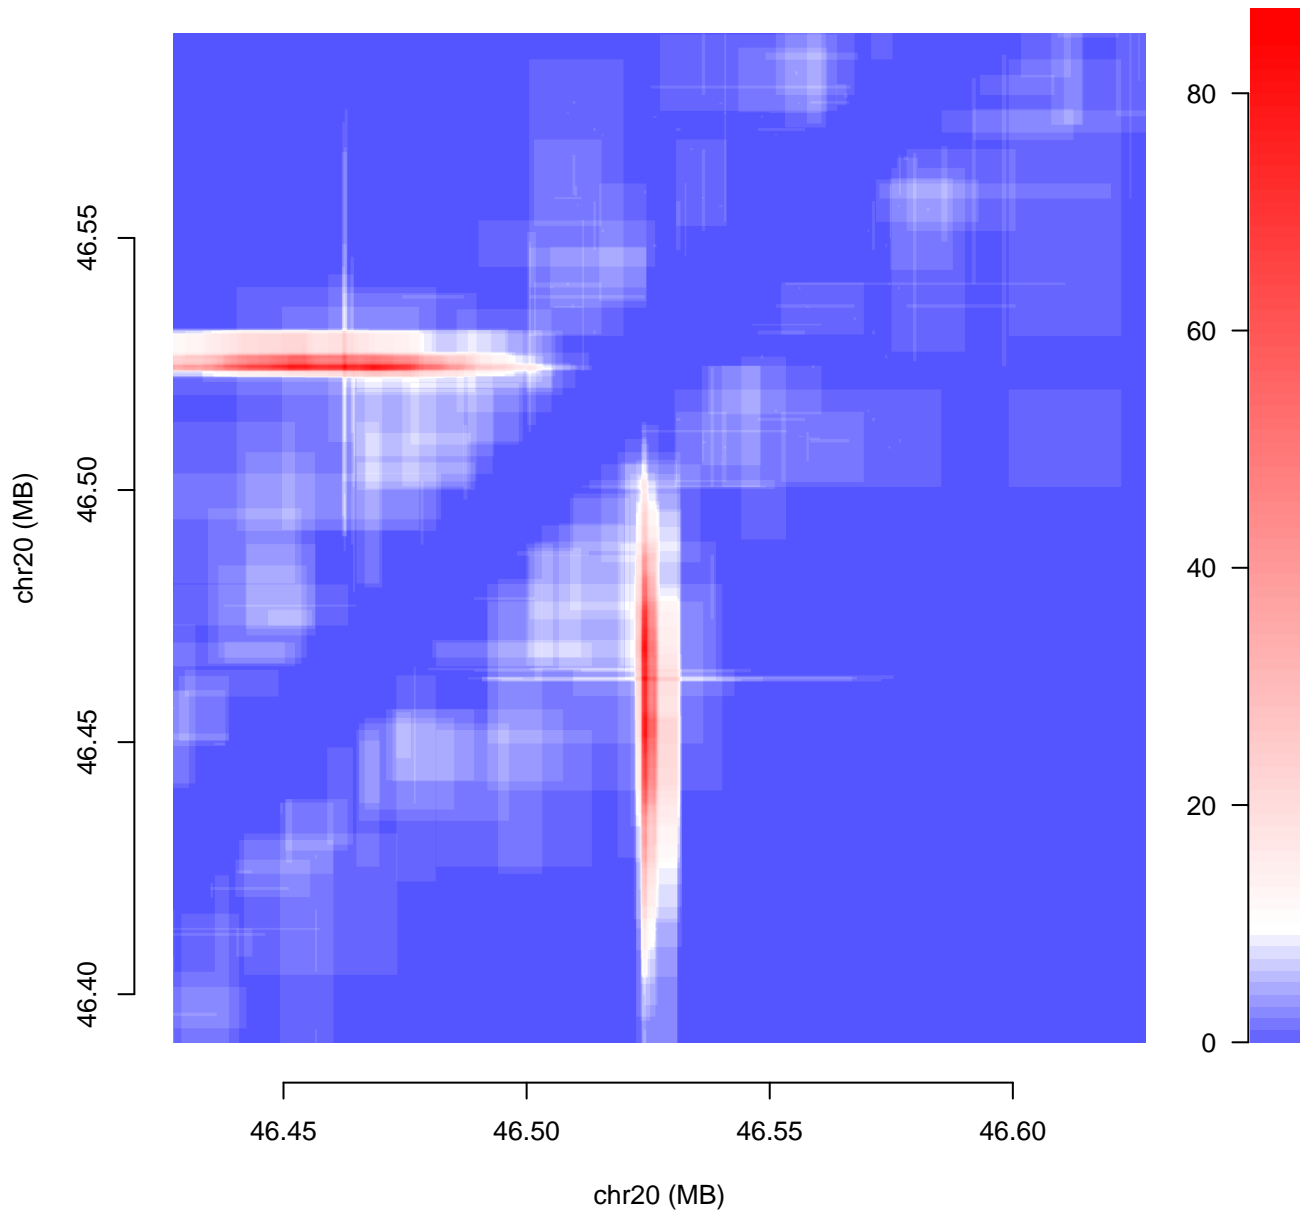

Supplement: Supplemental_Data.zip [file event_277.pdf › event_277.pdf]

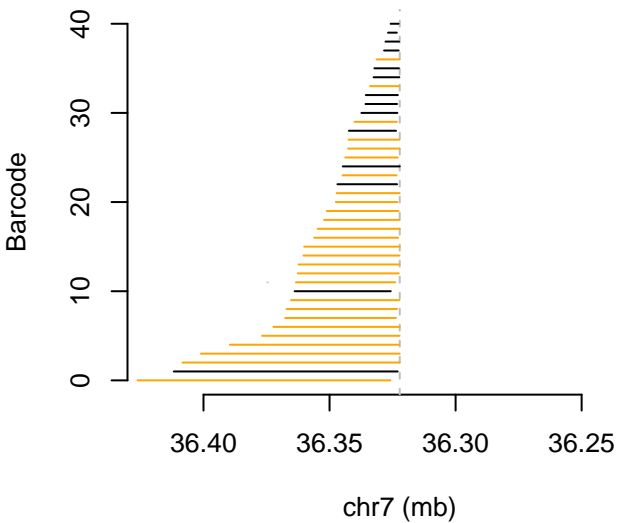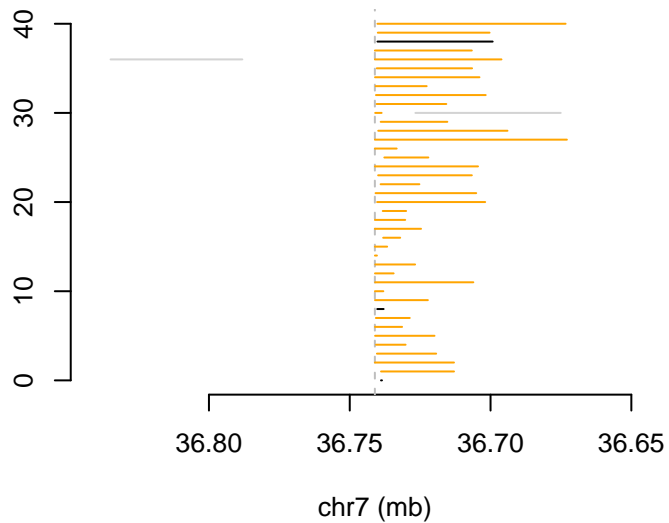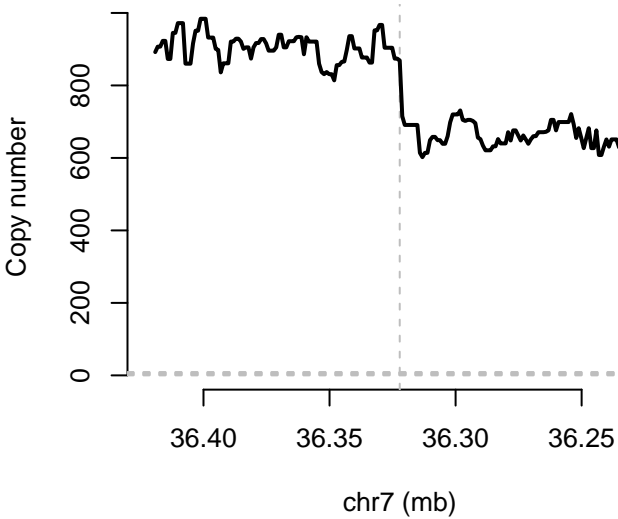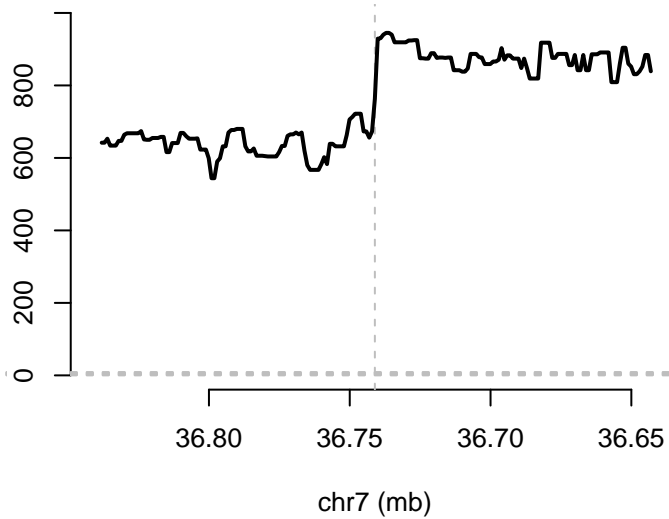

K562 chr7:36,741,077::chr7:36,322,154+-

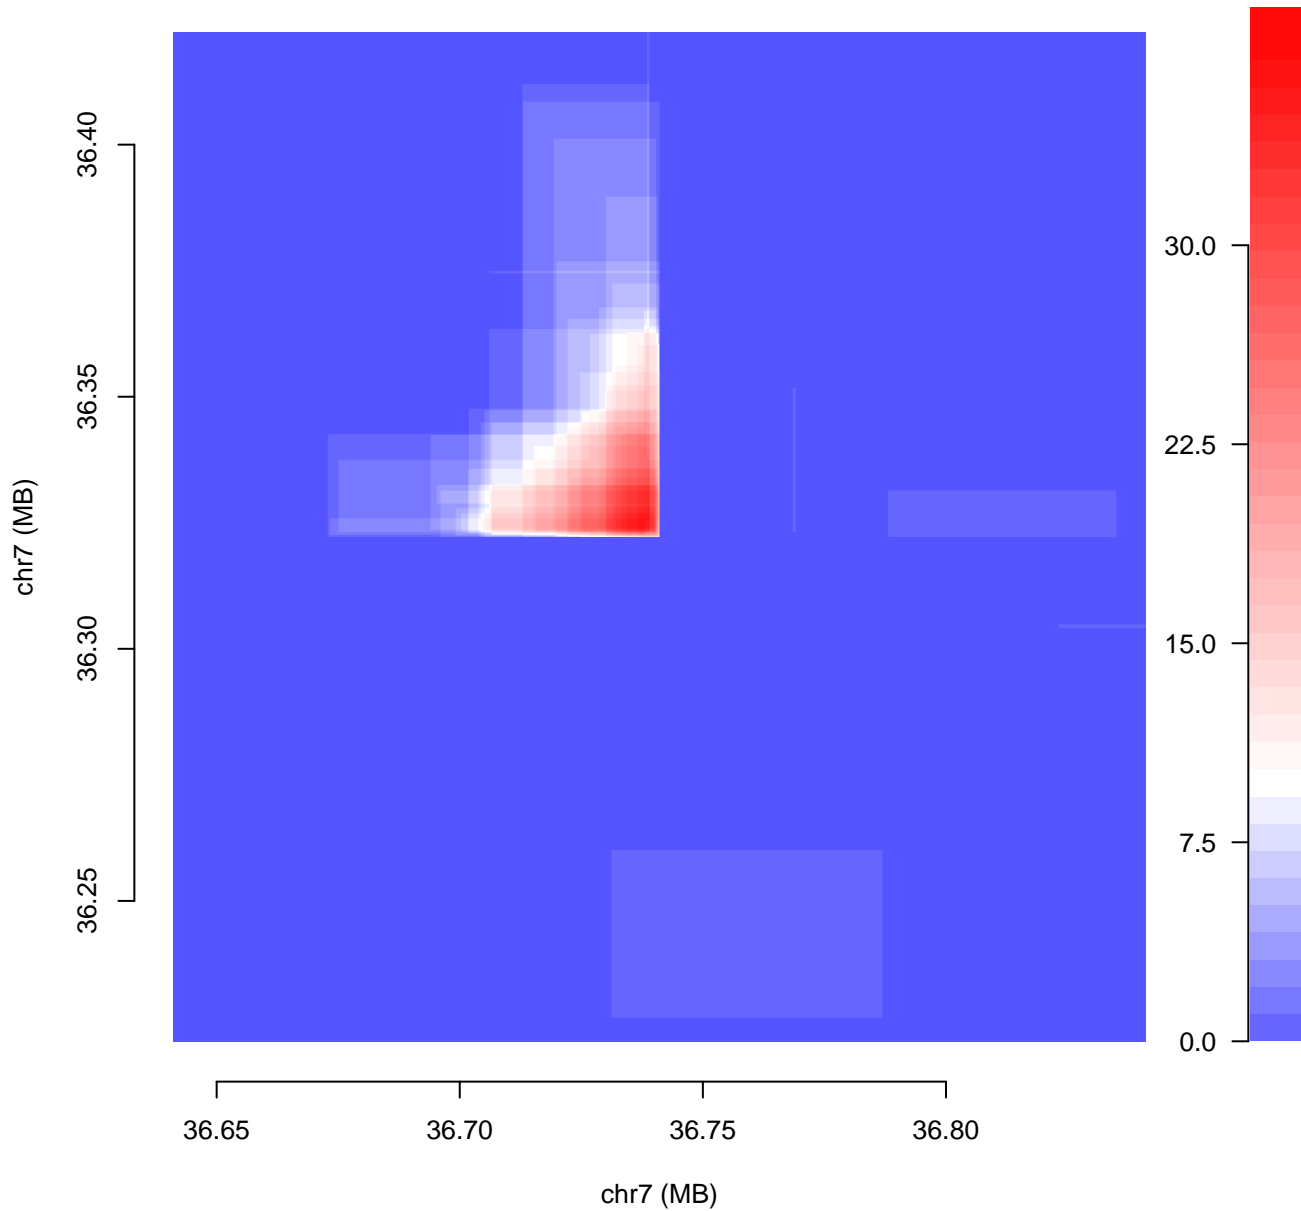

Supplement: Supplemental_Data.zip [file event_278.pdf › event_278.pdf]

Barcode

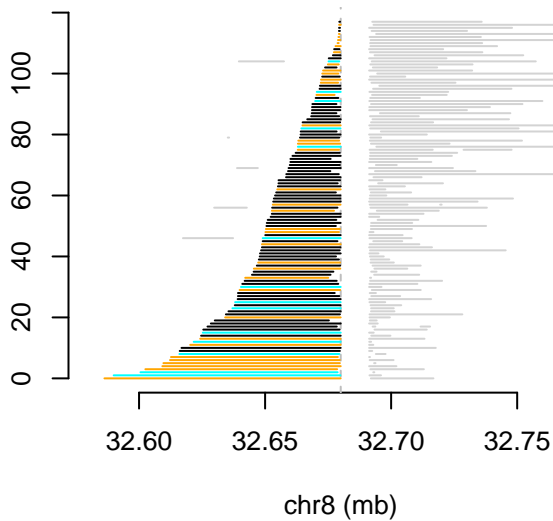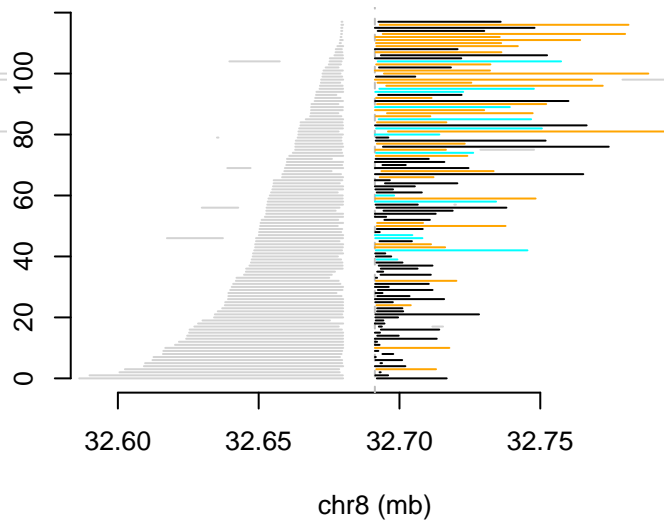

Copy number

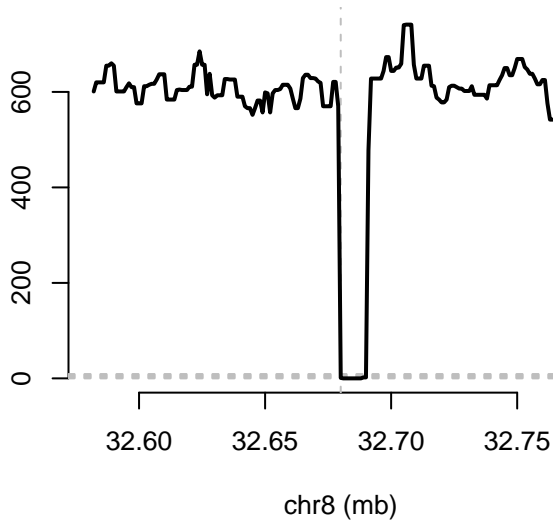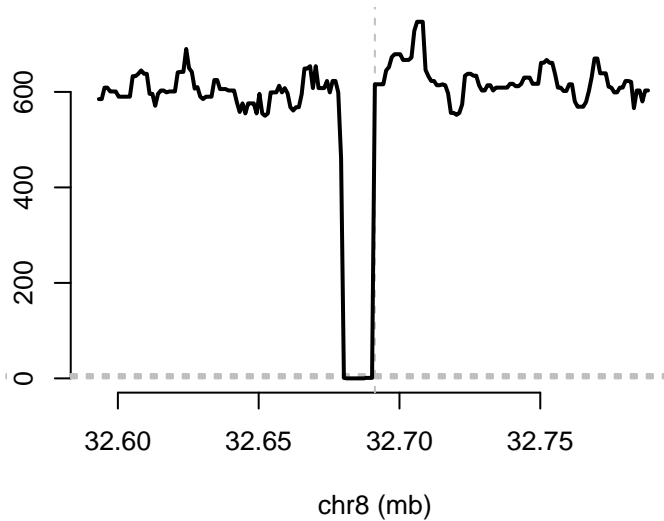

K562 chr8:32,680,009::chr8:32,691,261+-

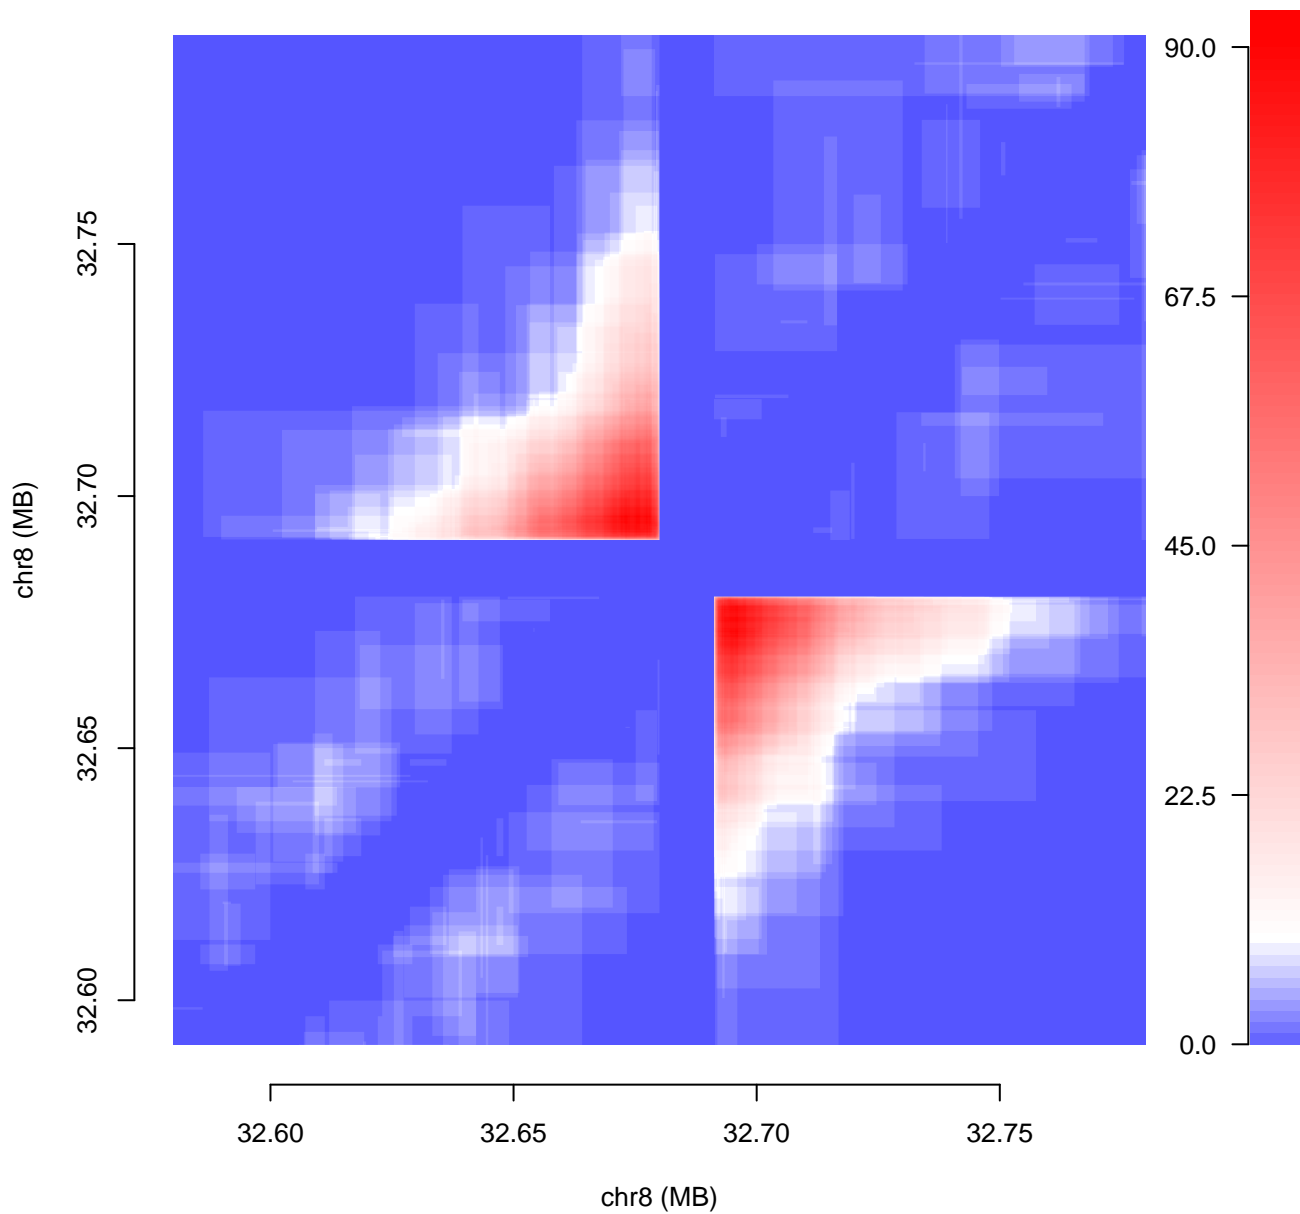

Supplement: Supplemental_Data.zip [file event_279.pdf › event_279.pdf]
