# Supplementary figures and images for: Comprehensive, integrated, and phased whole-genome analysis of the primary ENCODE cell line K562 (part 3 of 6)
Source: HighWire-hosted journal article supplement (doi:10.1101/gr.234948.118), 2019-02-08

Barcode

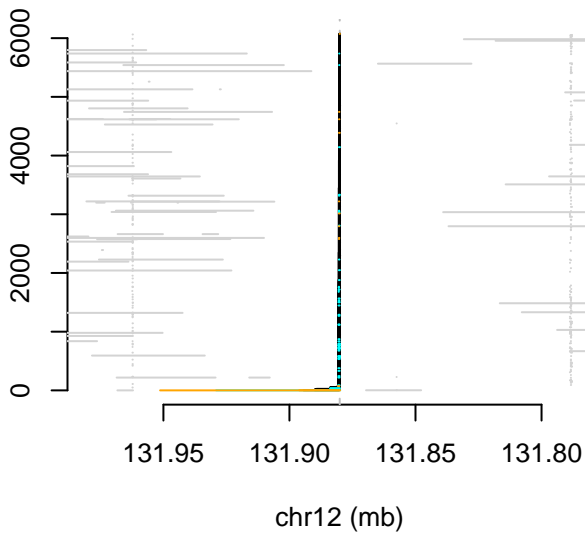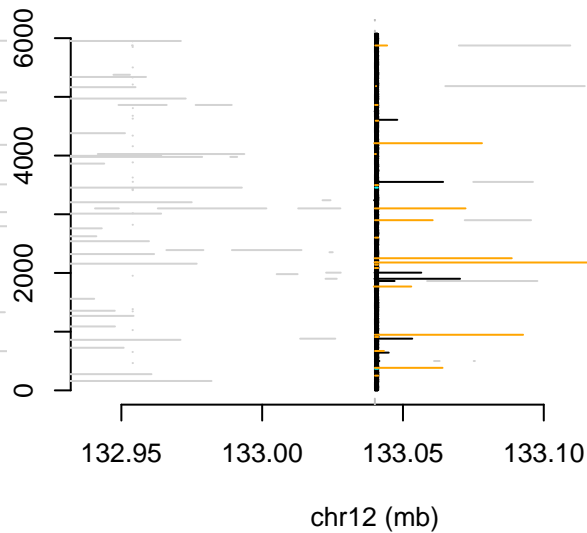

Copy number

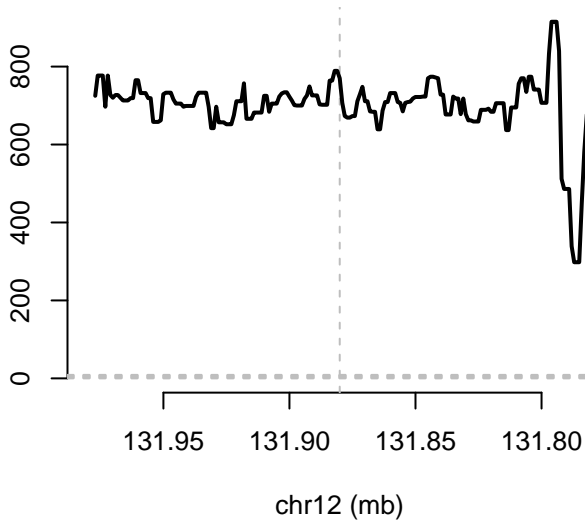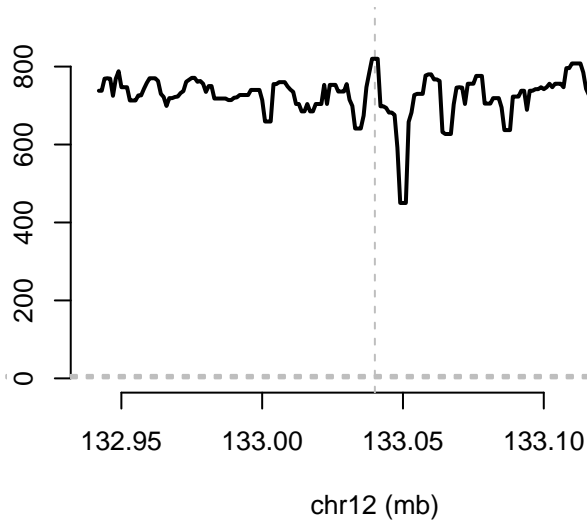

K562 chr12:131,880,048::chr12:133,040,025--

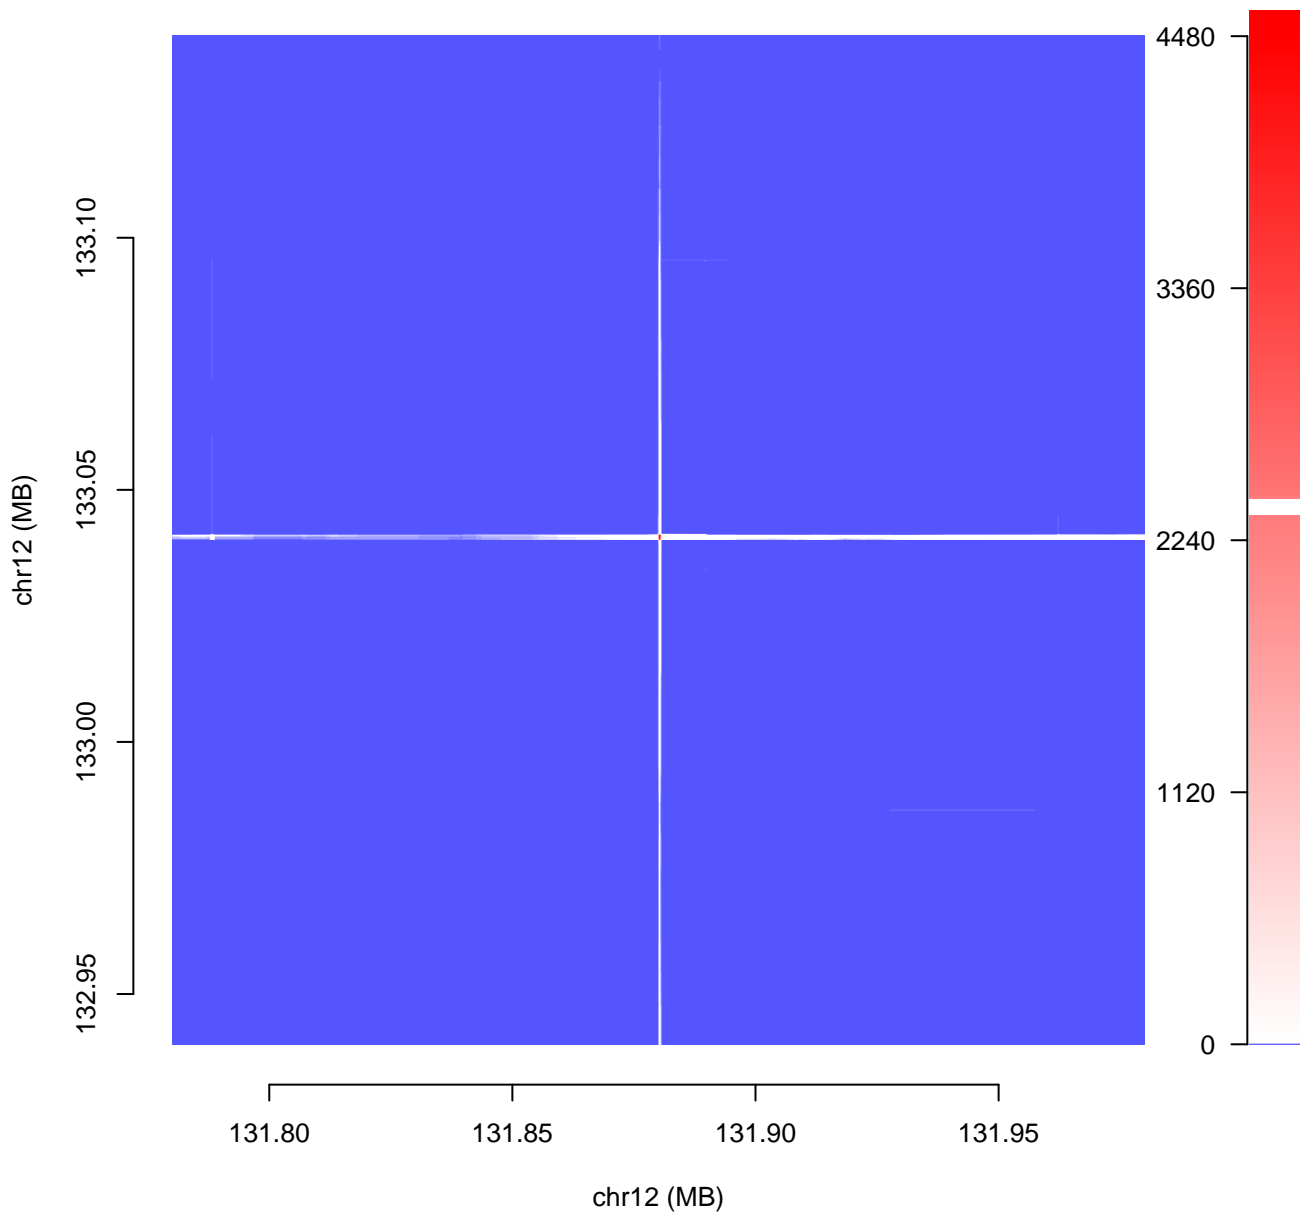

Supplement: Supplemental_Data.zip [file event_28.pdf › event_28.pdf]

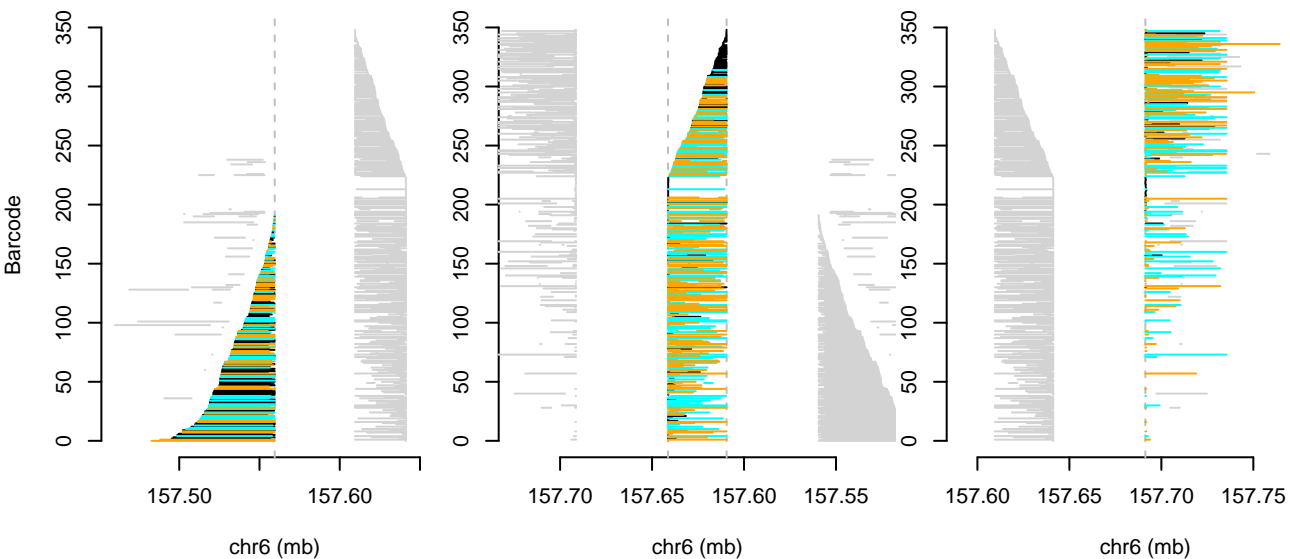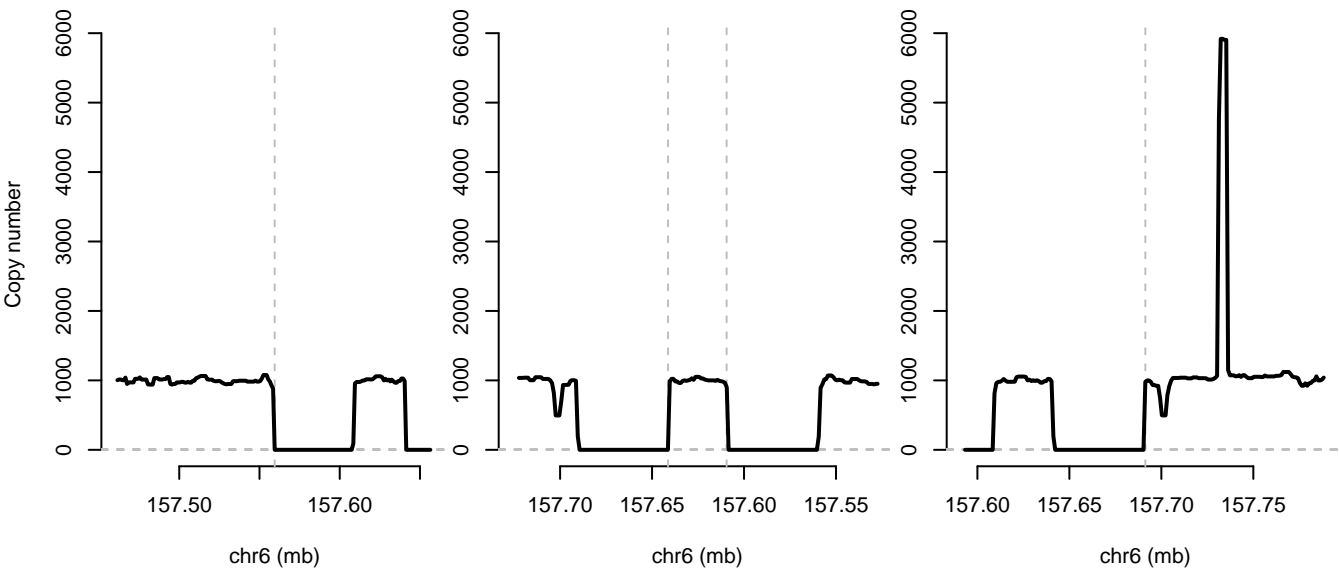

K562 chr6:157,641,304::chr6:157,559,469++

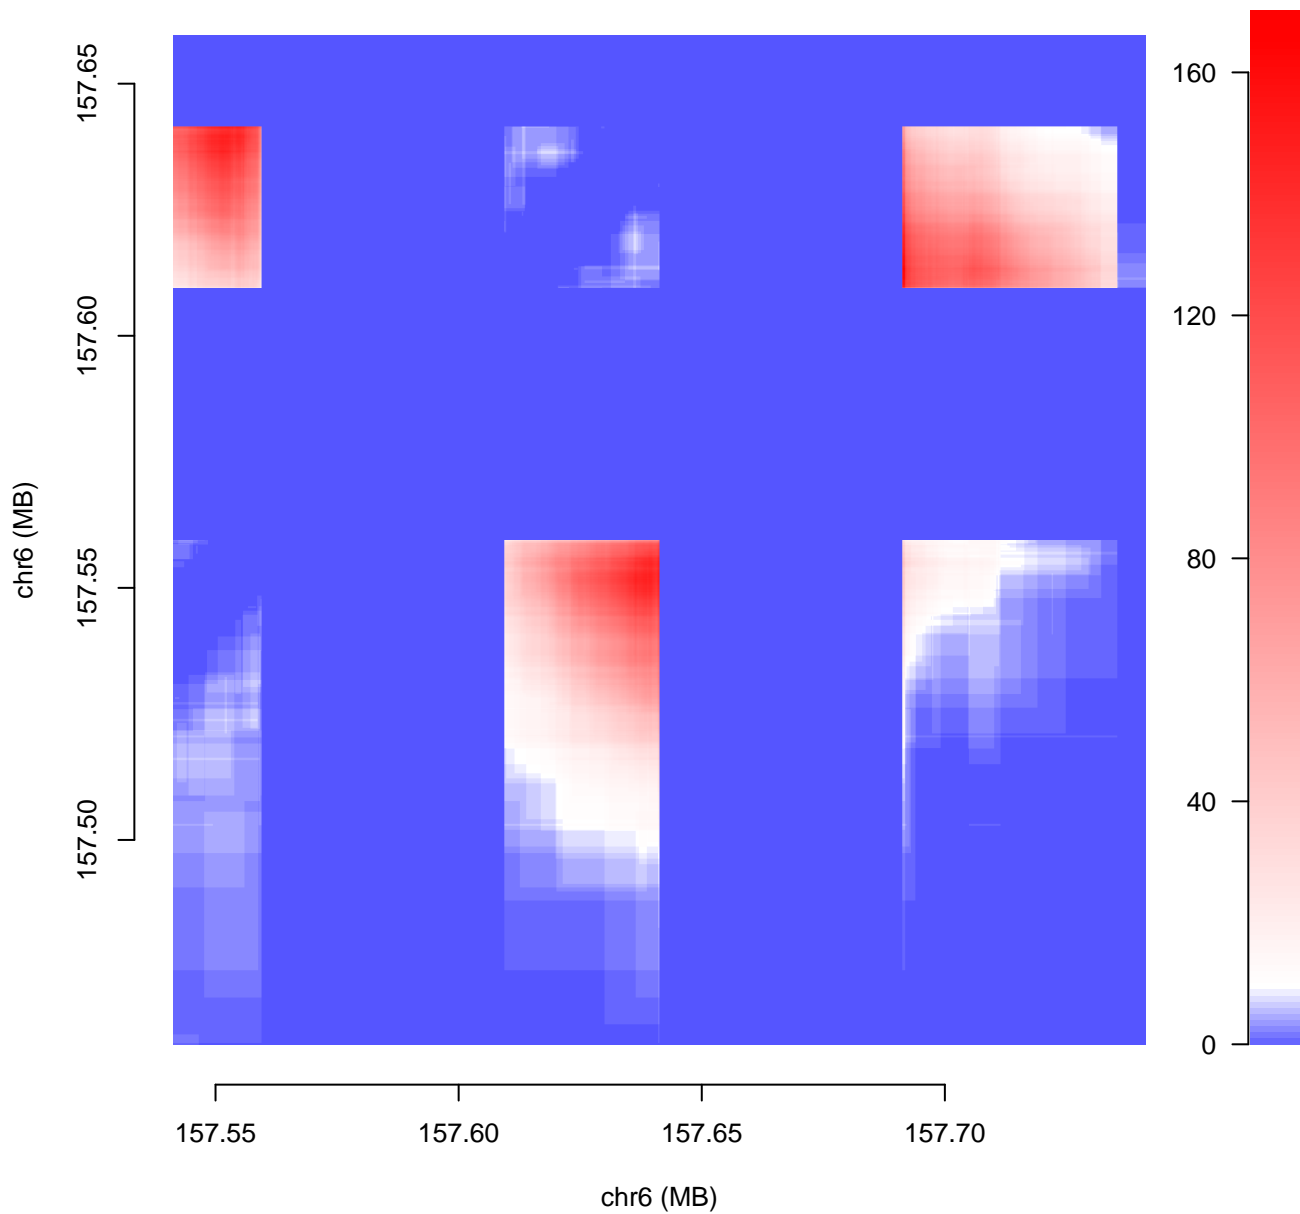

K562 chr6:157,641,304::chr6:157,609,465+-

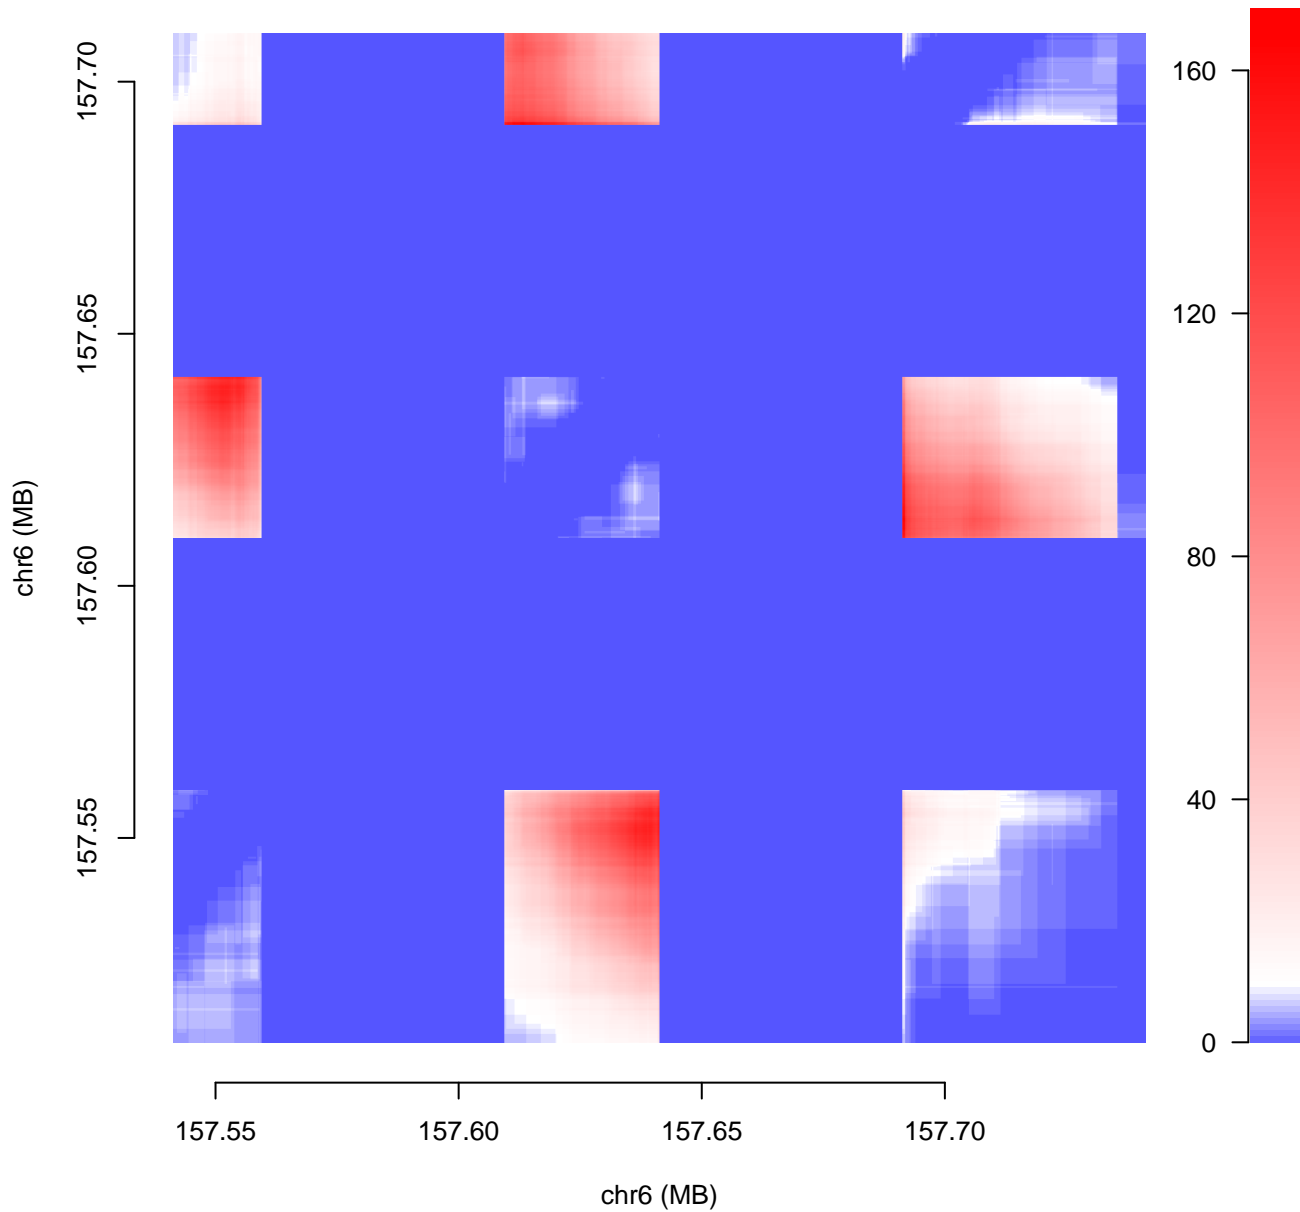

K562 chr6:157,691,296::chr6:157,609,465--

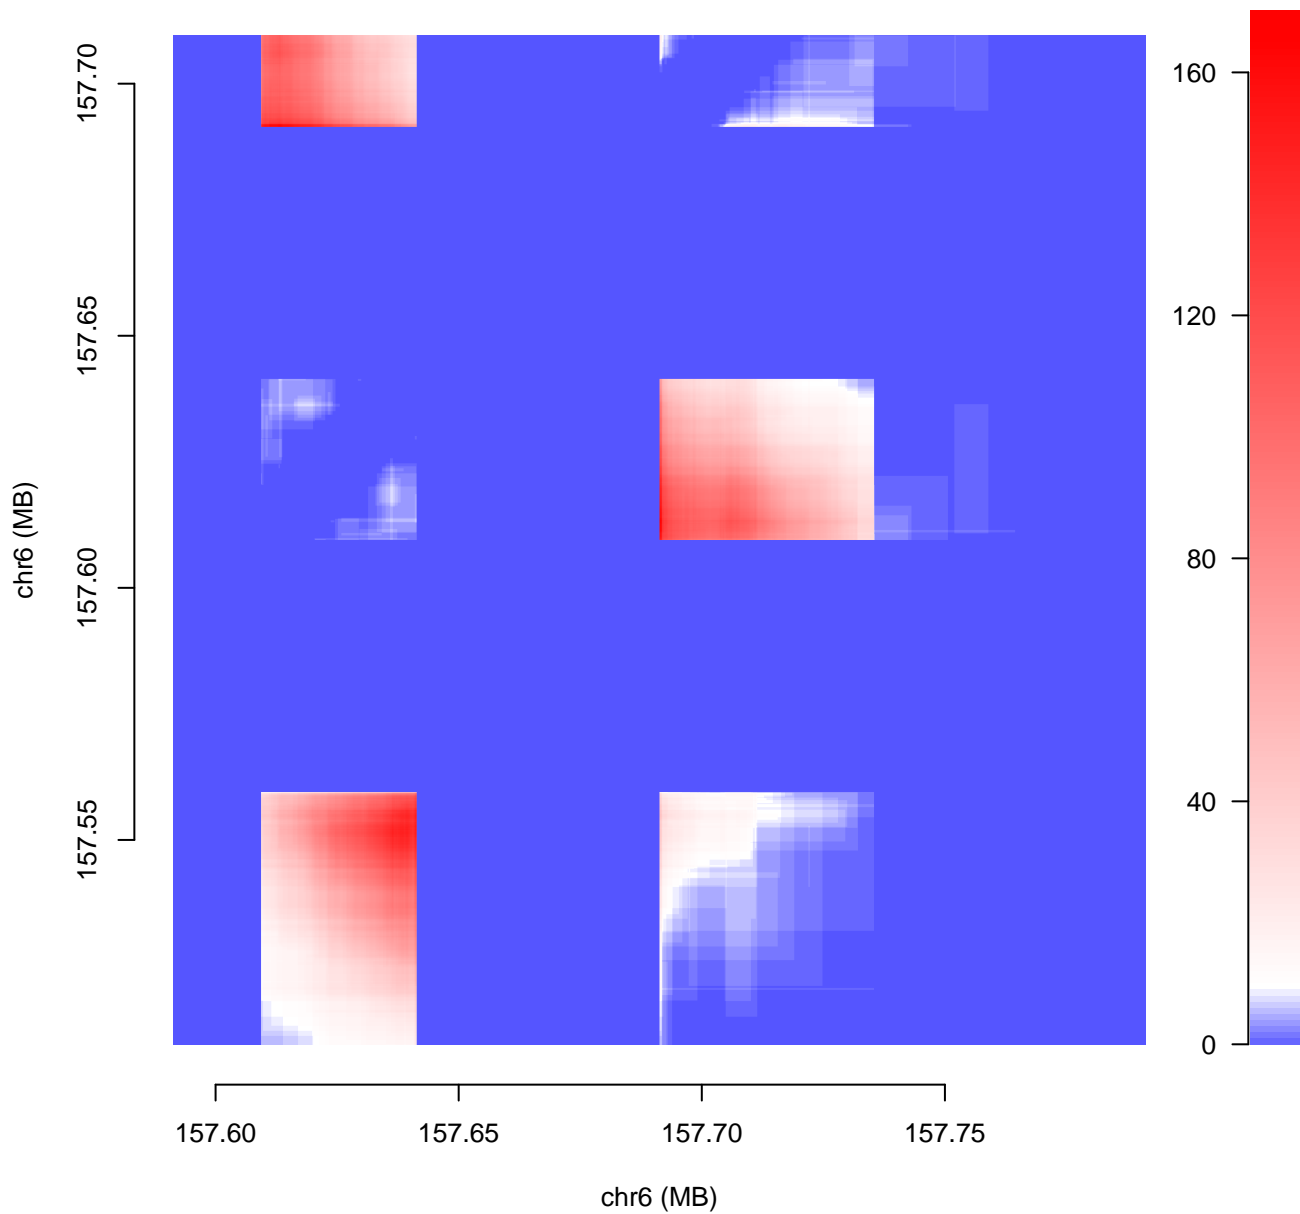

Supplement: Supplemental_Data.zip [file event_280.pdf › event_280.pdf]

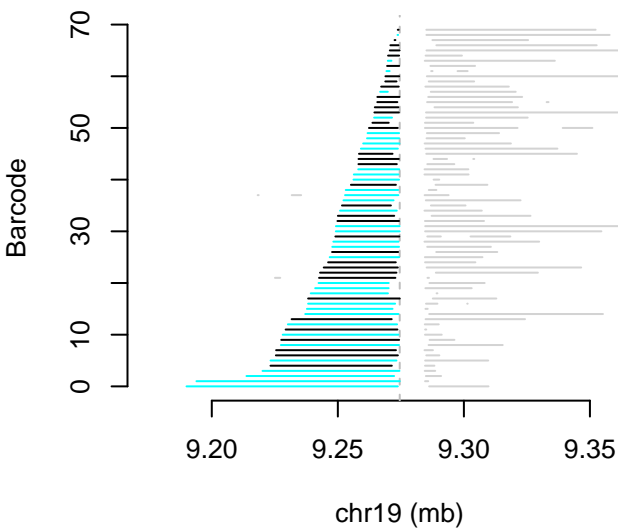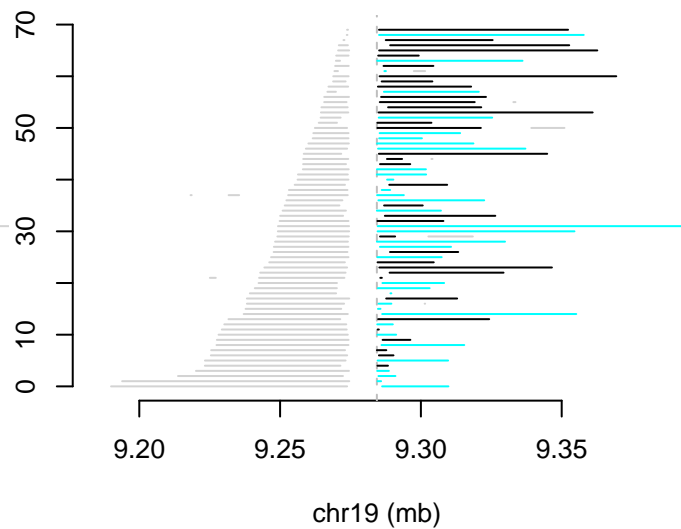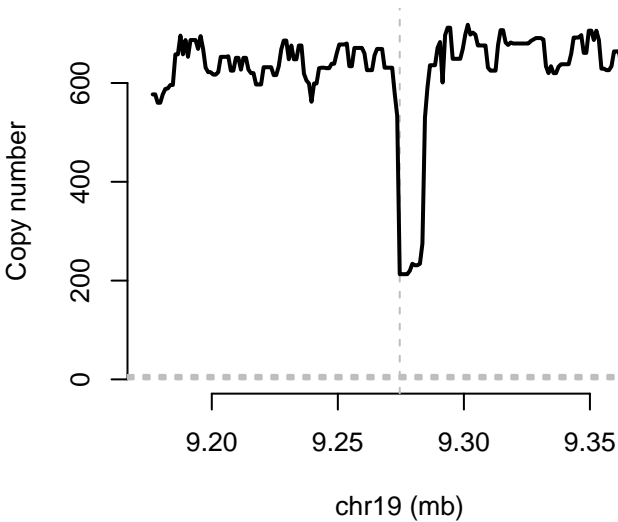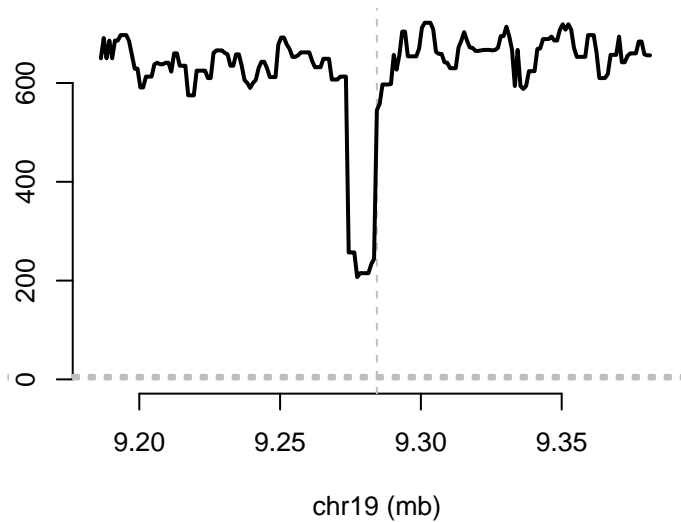

K562 chr19:9,284,363::chr19:9,274,558-+

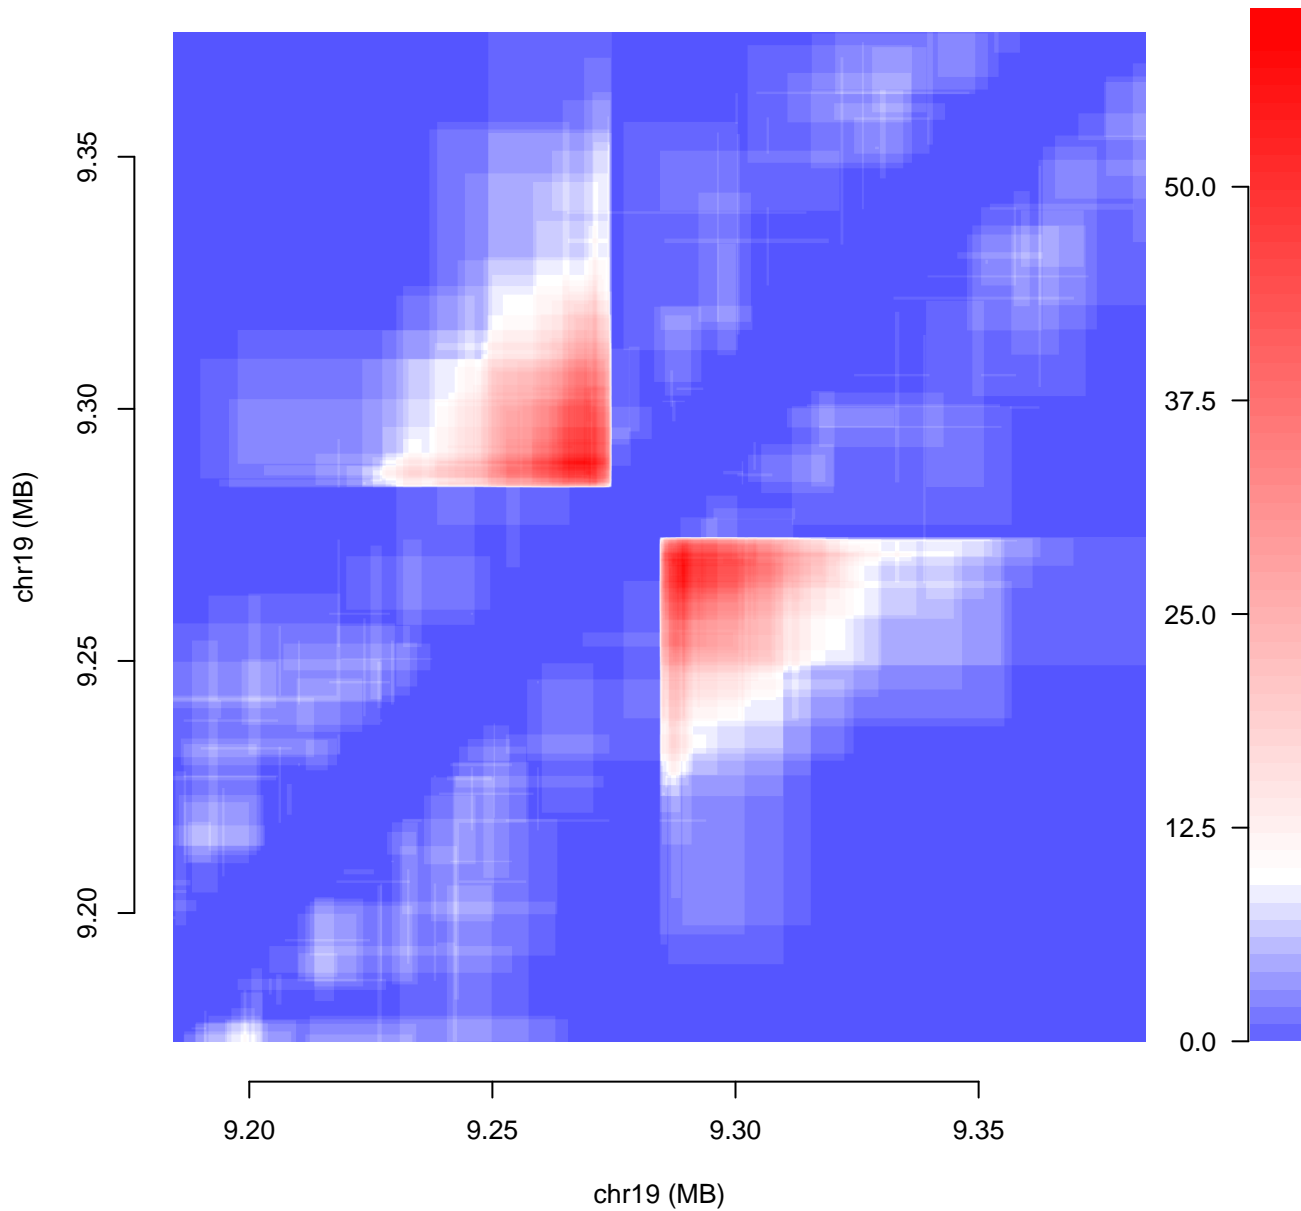

Supplement: Supplemental_Data.zip [file event_281.pdf › event_281.pdf]

Barcode

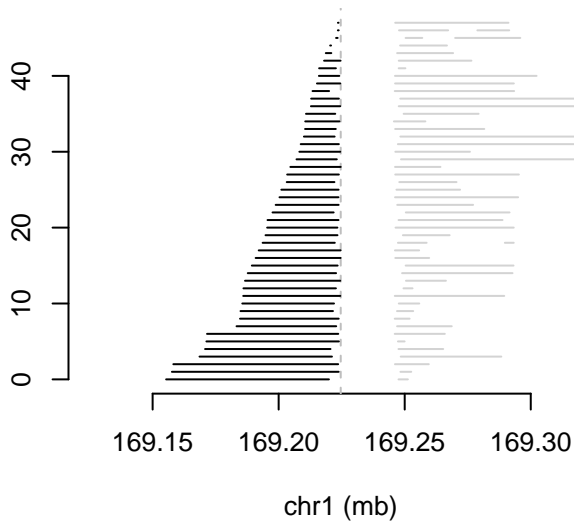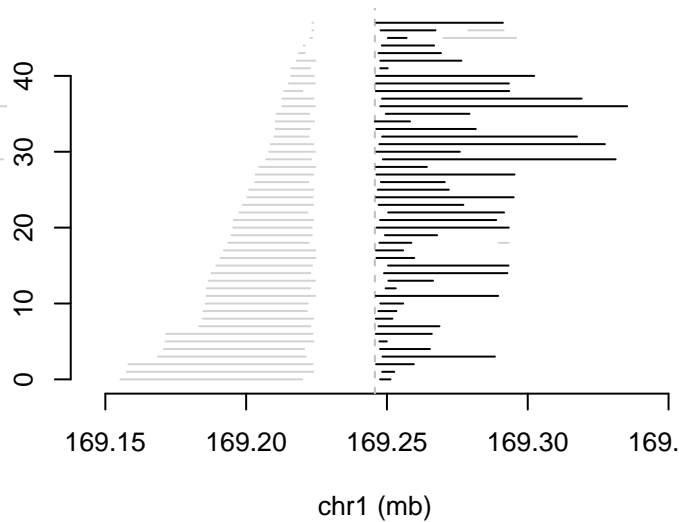

Copy number

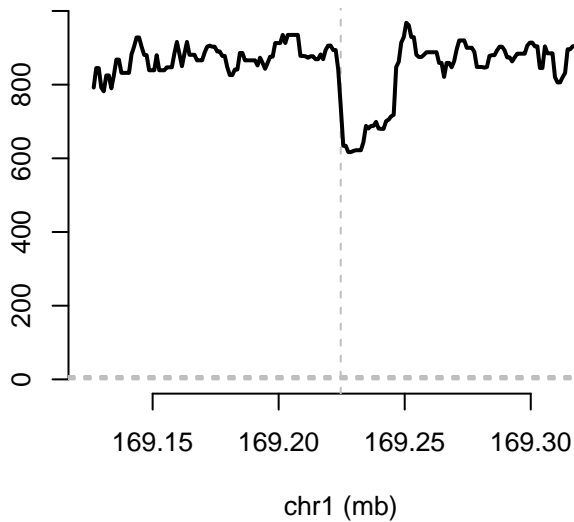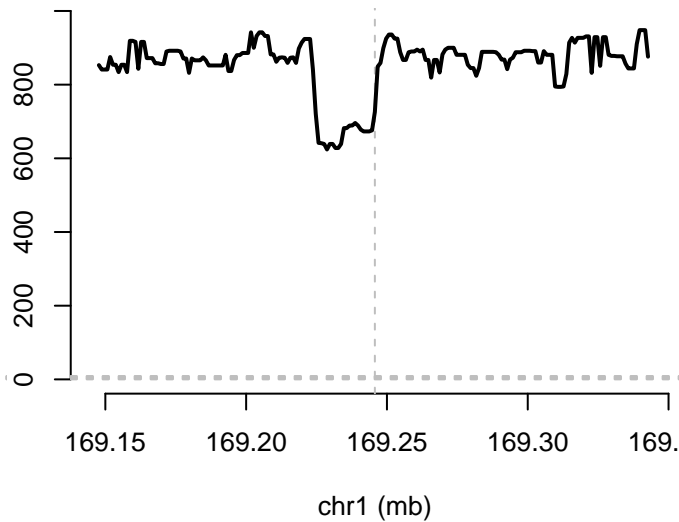

K562 chr1:169,245,710::chr1:169,224,628-+

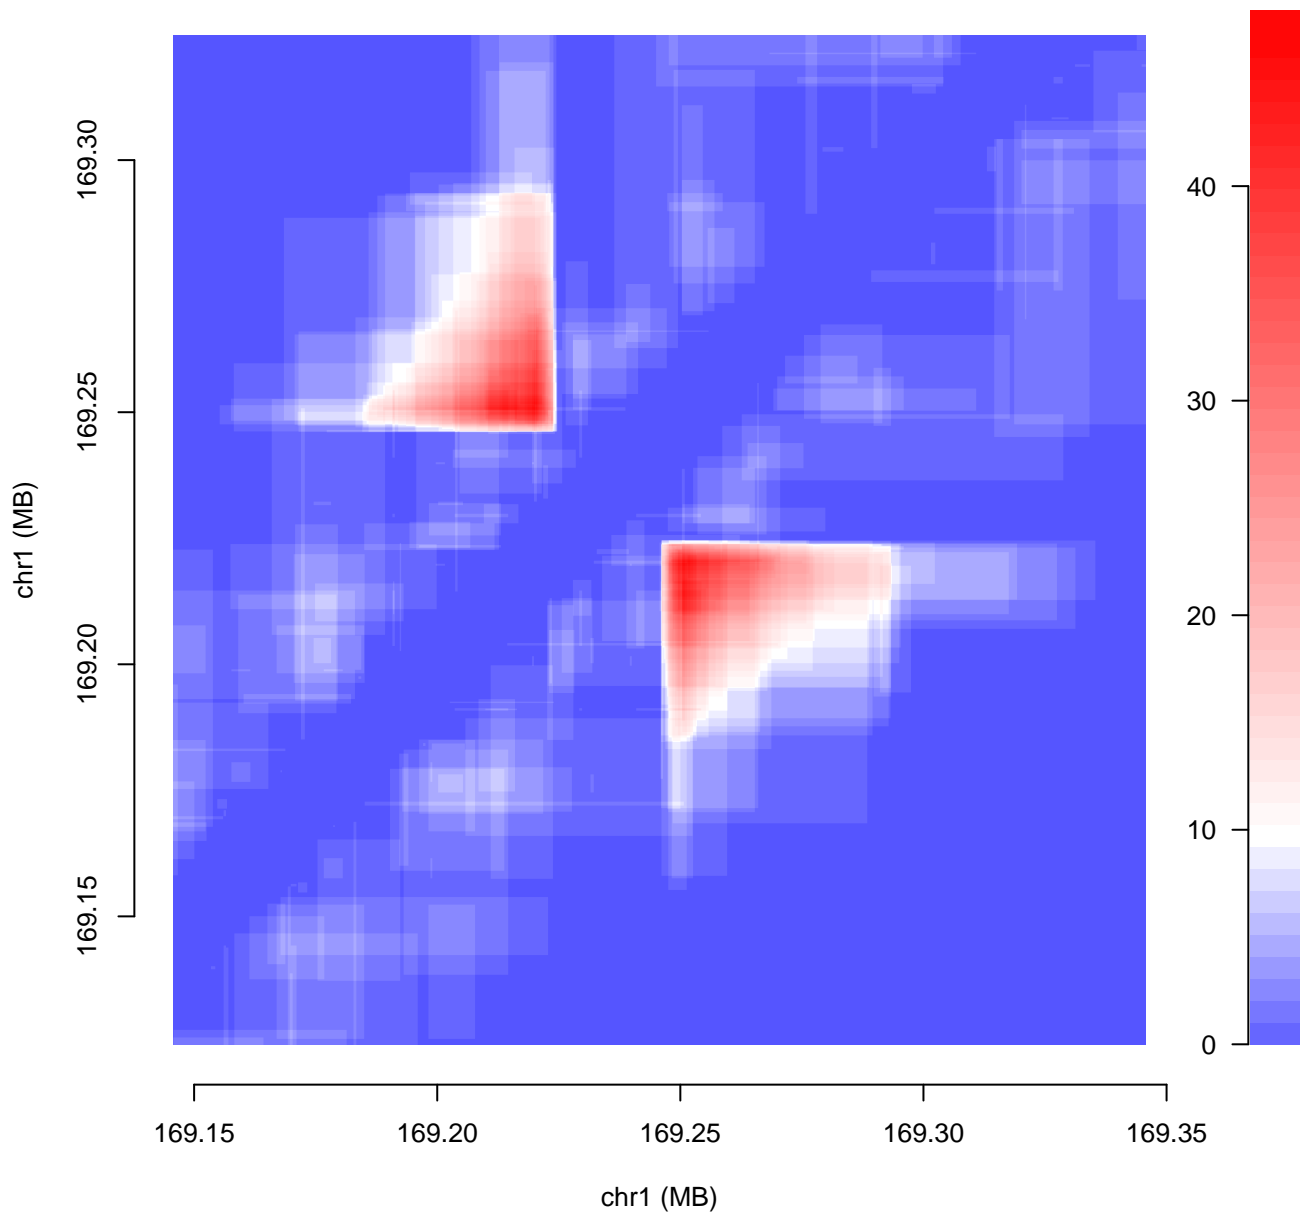

Supplement: Supplemental_Data.zip [file event_282.pdf › event_282.pdf]

Barcode

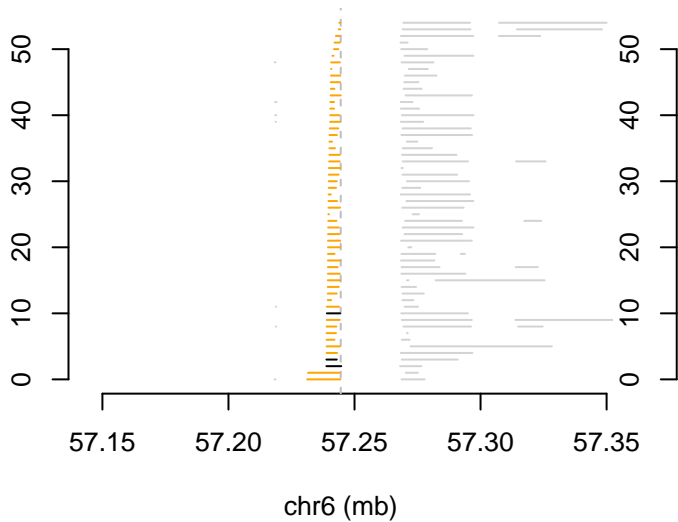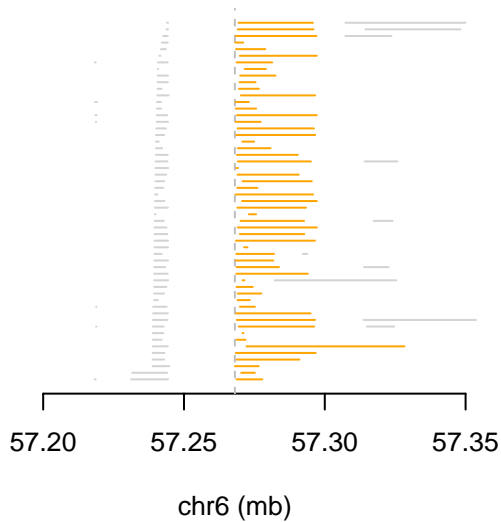

Copy number

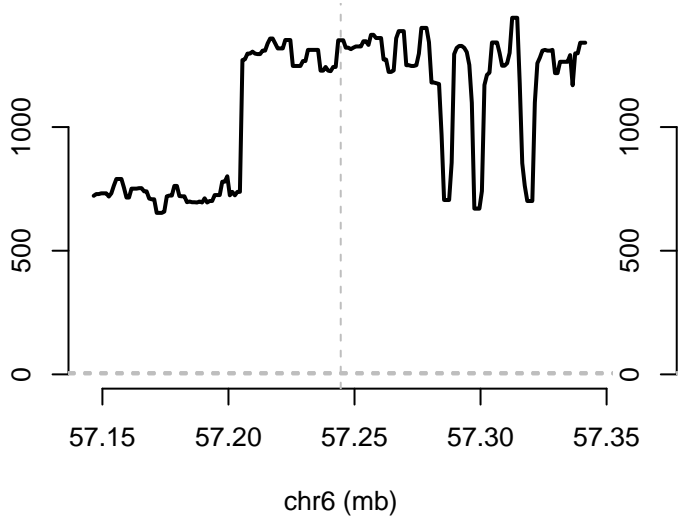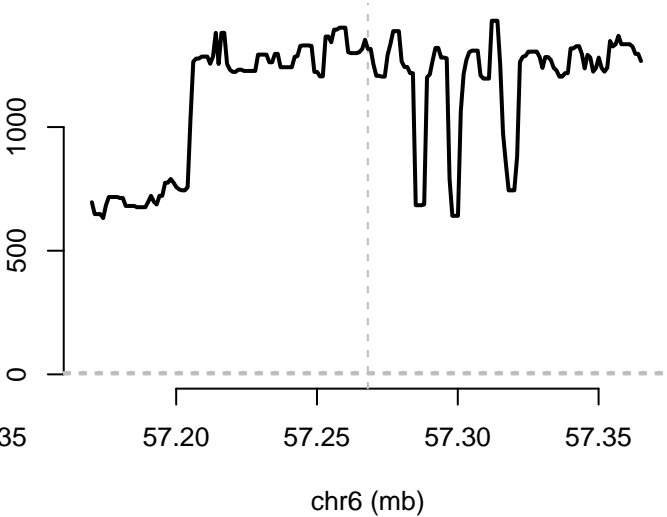

K562 chr6:57,244,538::chr6:57,268,069+-

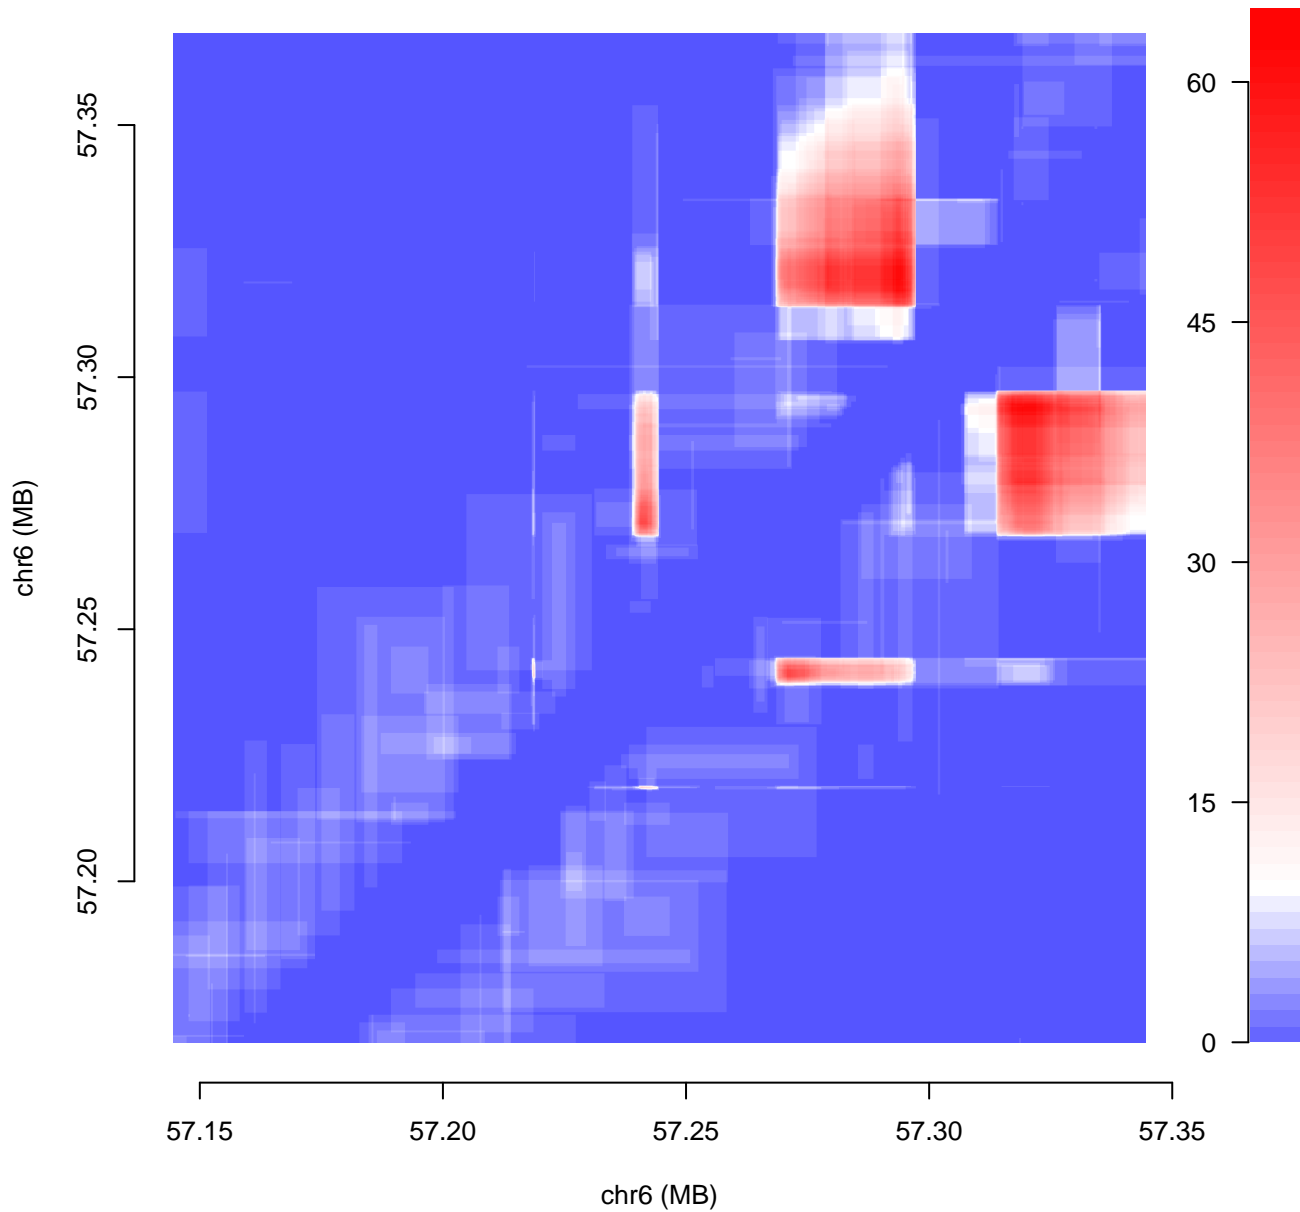

Supplement: Supplemental_Data.zip [file event_283.pdf › event_283.pdf]

Barcode

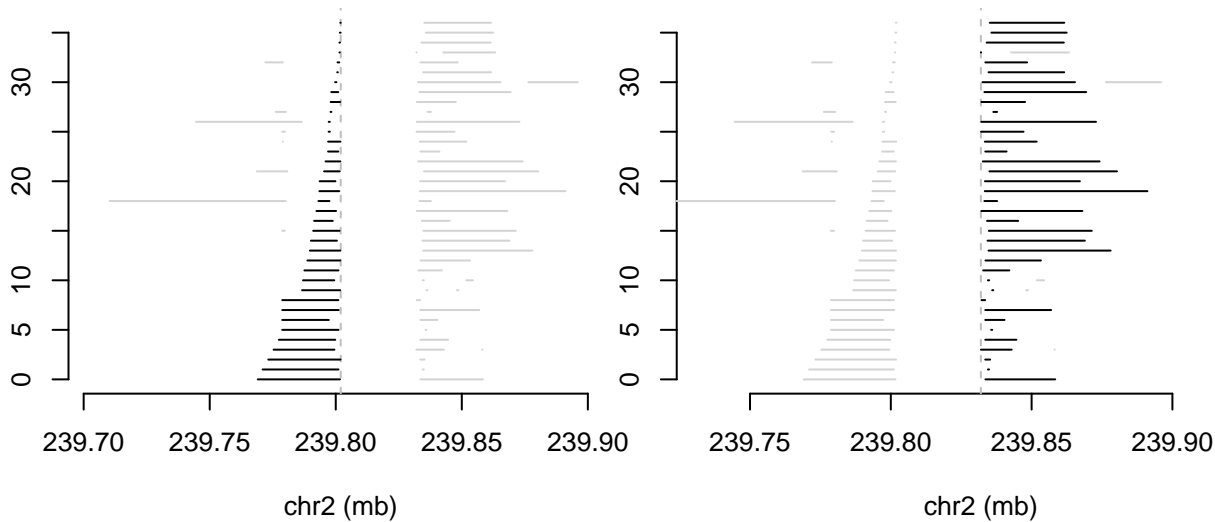

Copy number

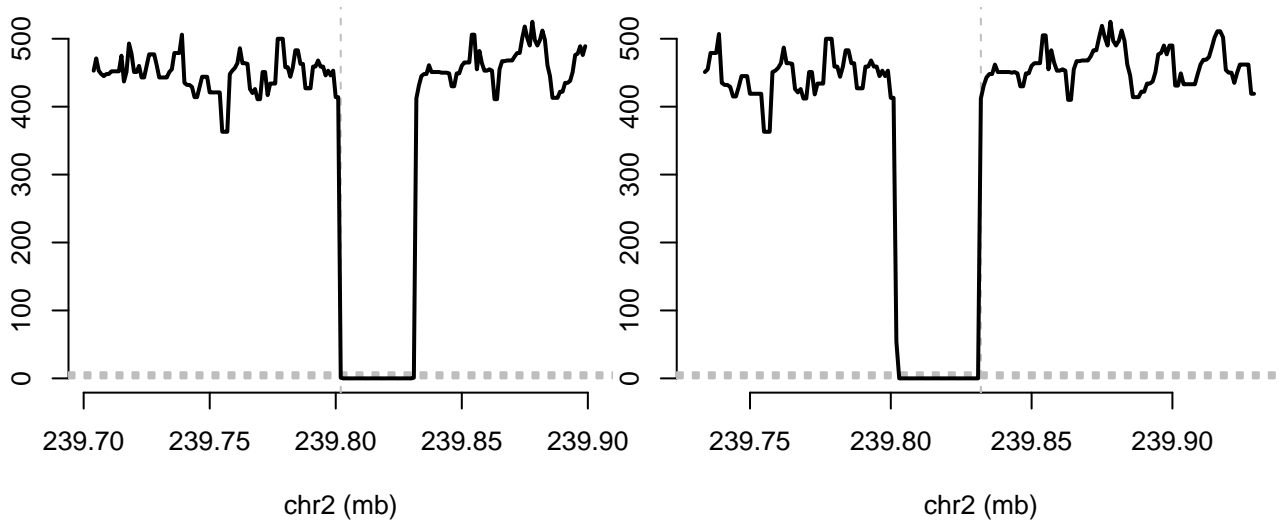

K562 chr2:239,831,977::chr2:239,801,978-+

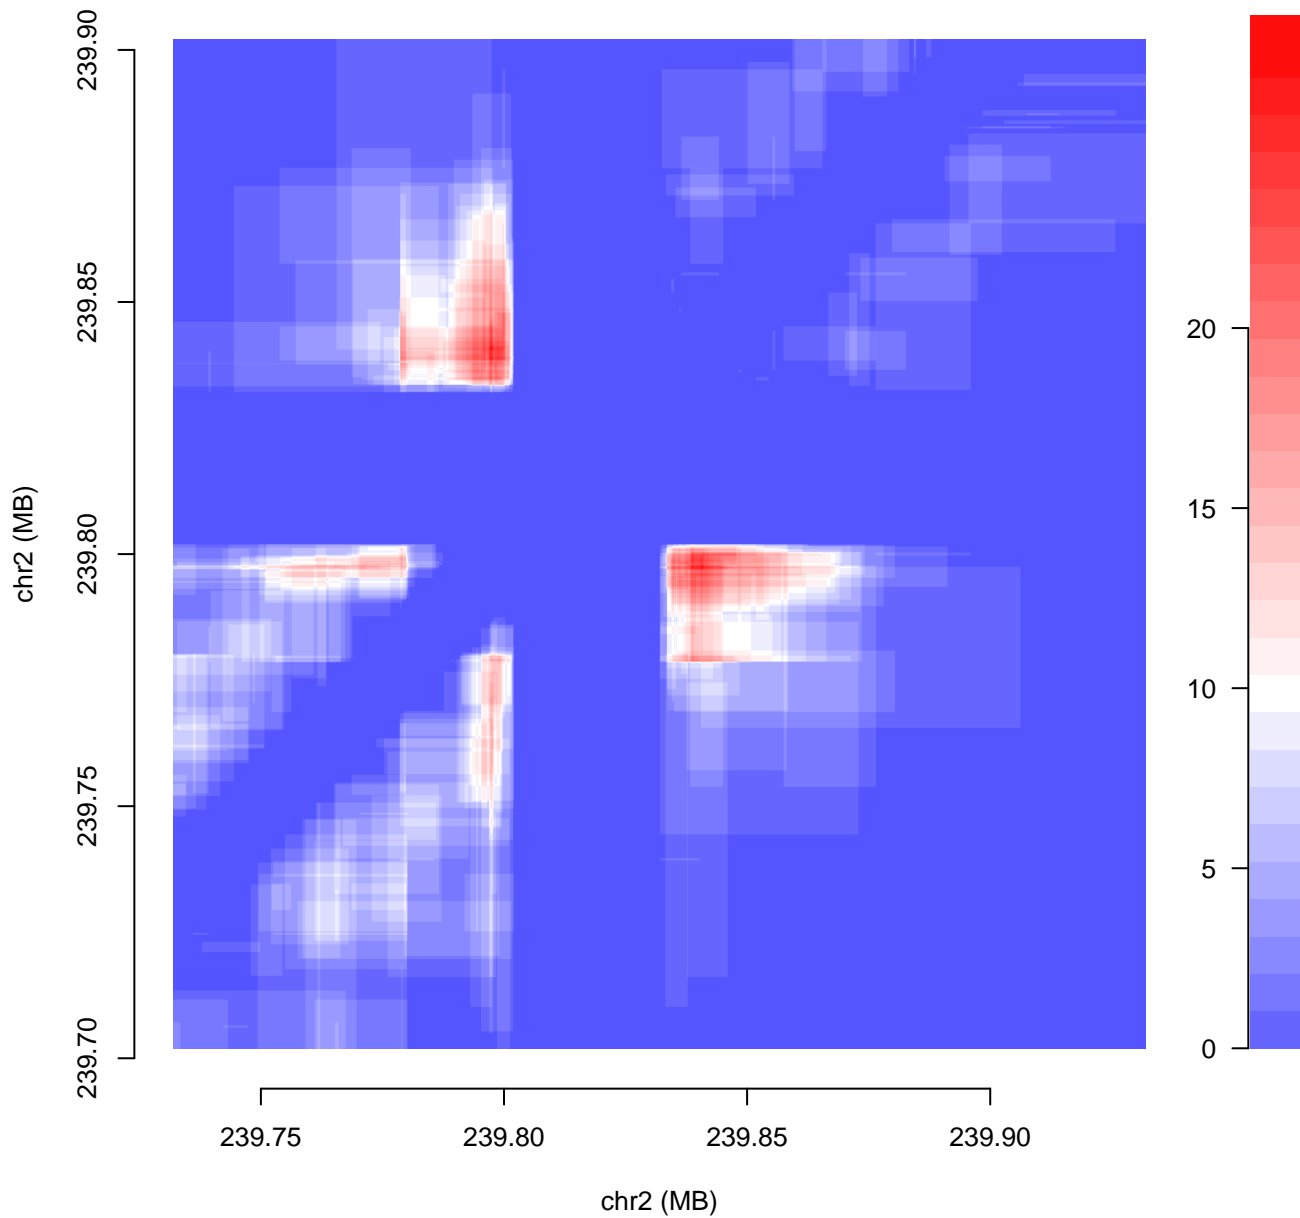

Supplement: Supplemental_Data.zip [file event_284.pdf › event_284.pdf]

Barcode

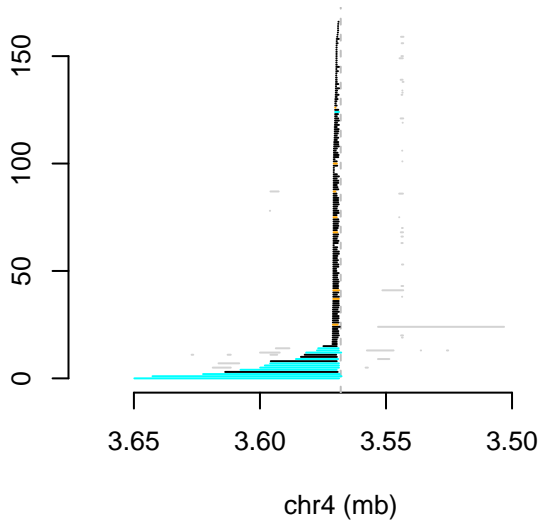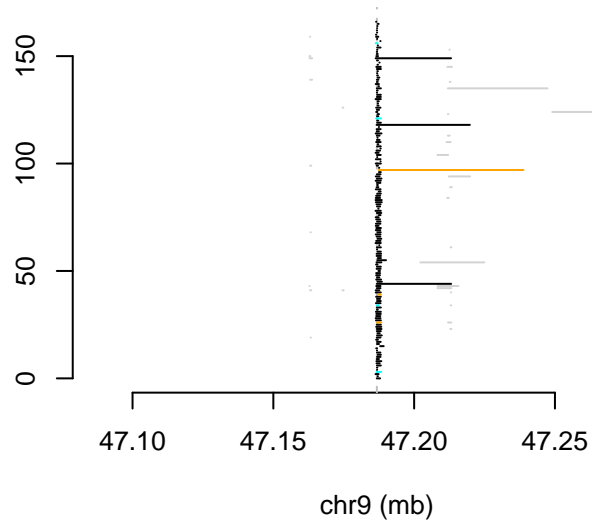

Copy number

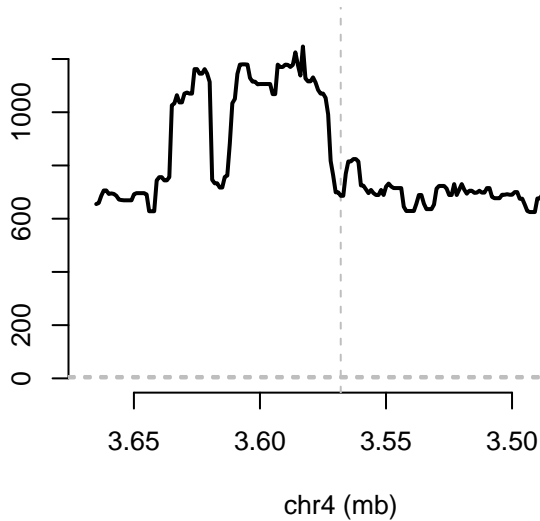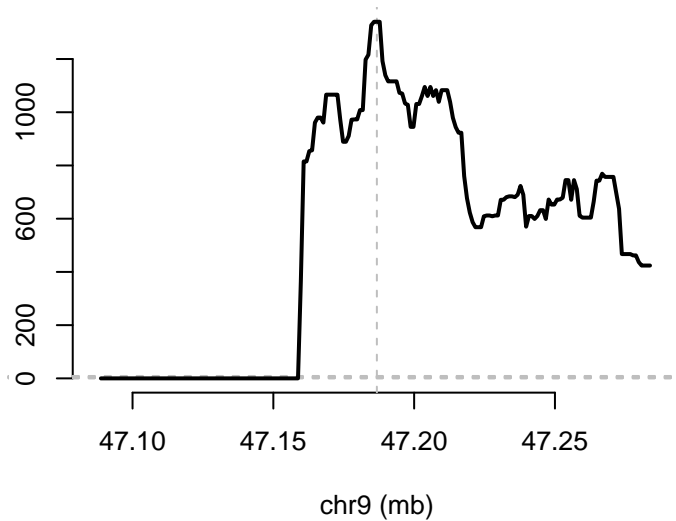

K562 chr4:3,567,955::chr9:47,186,762--

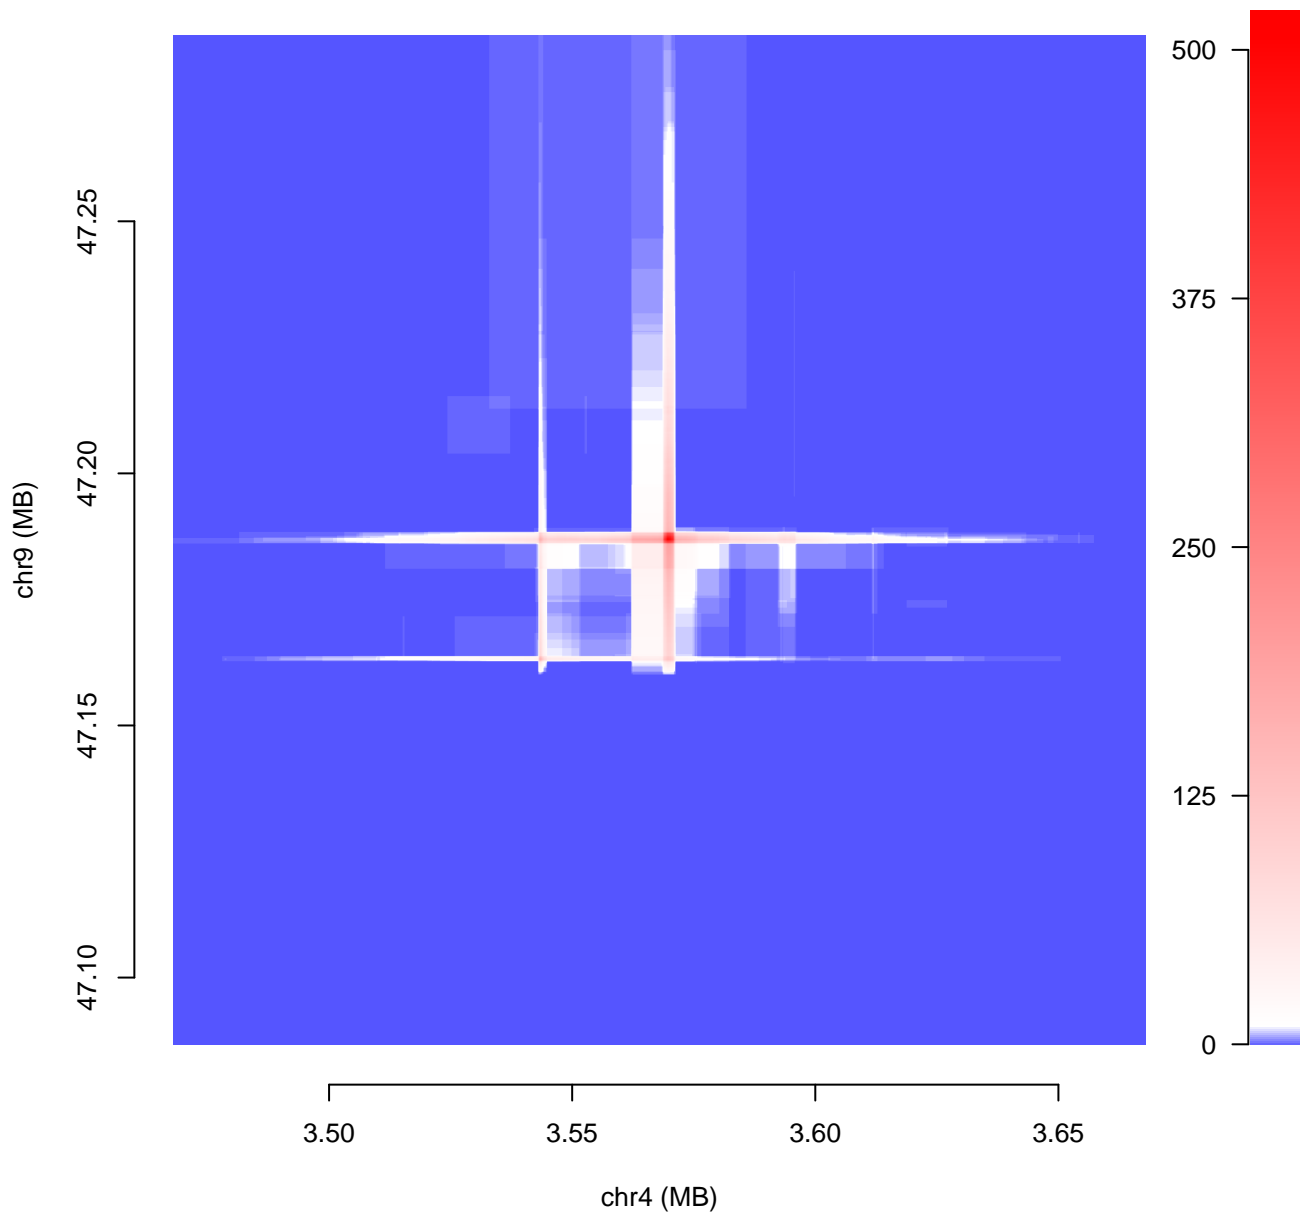

Supplement: Supplemental_Data.zip [file event_285.pdf › event_285.pdf]

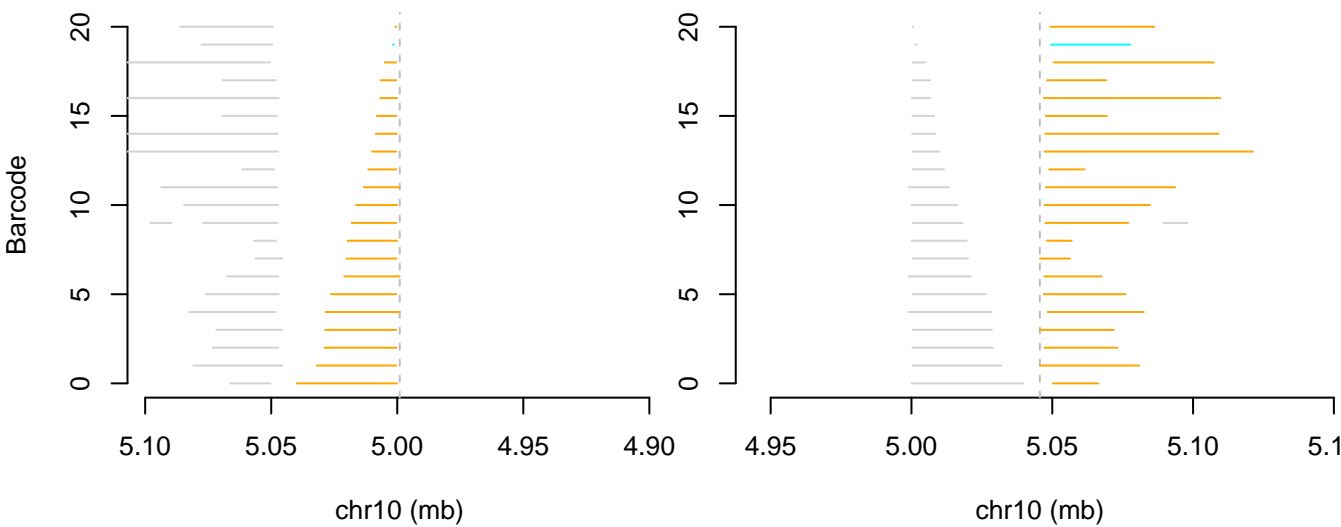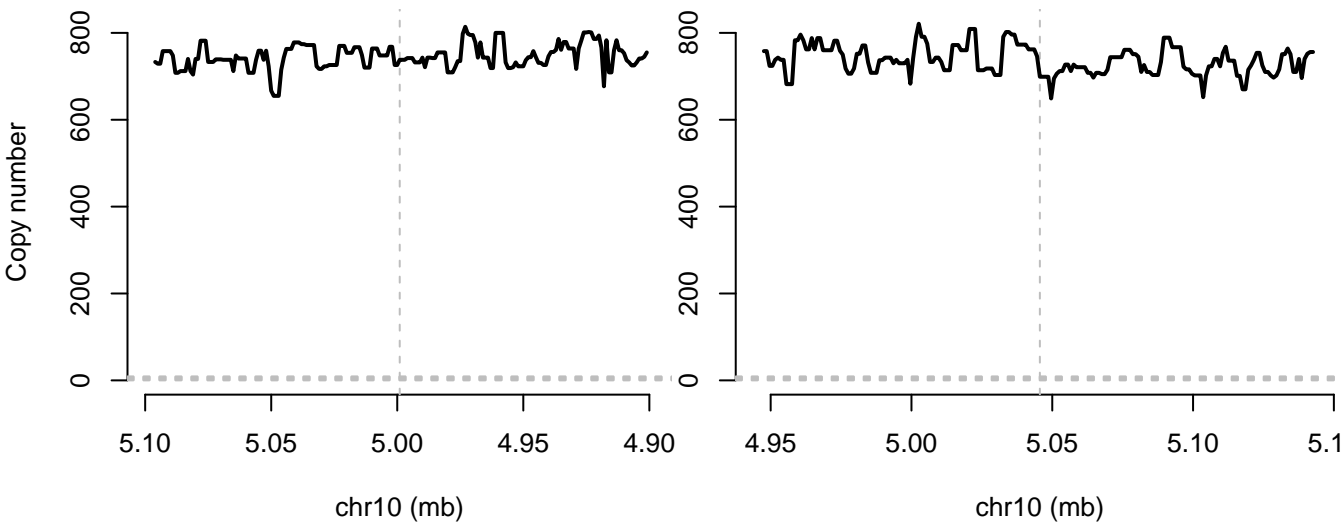

K562 chr10:5,045,598::chr10:4,999,016--

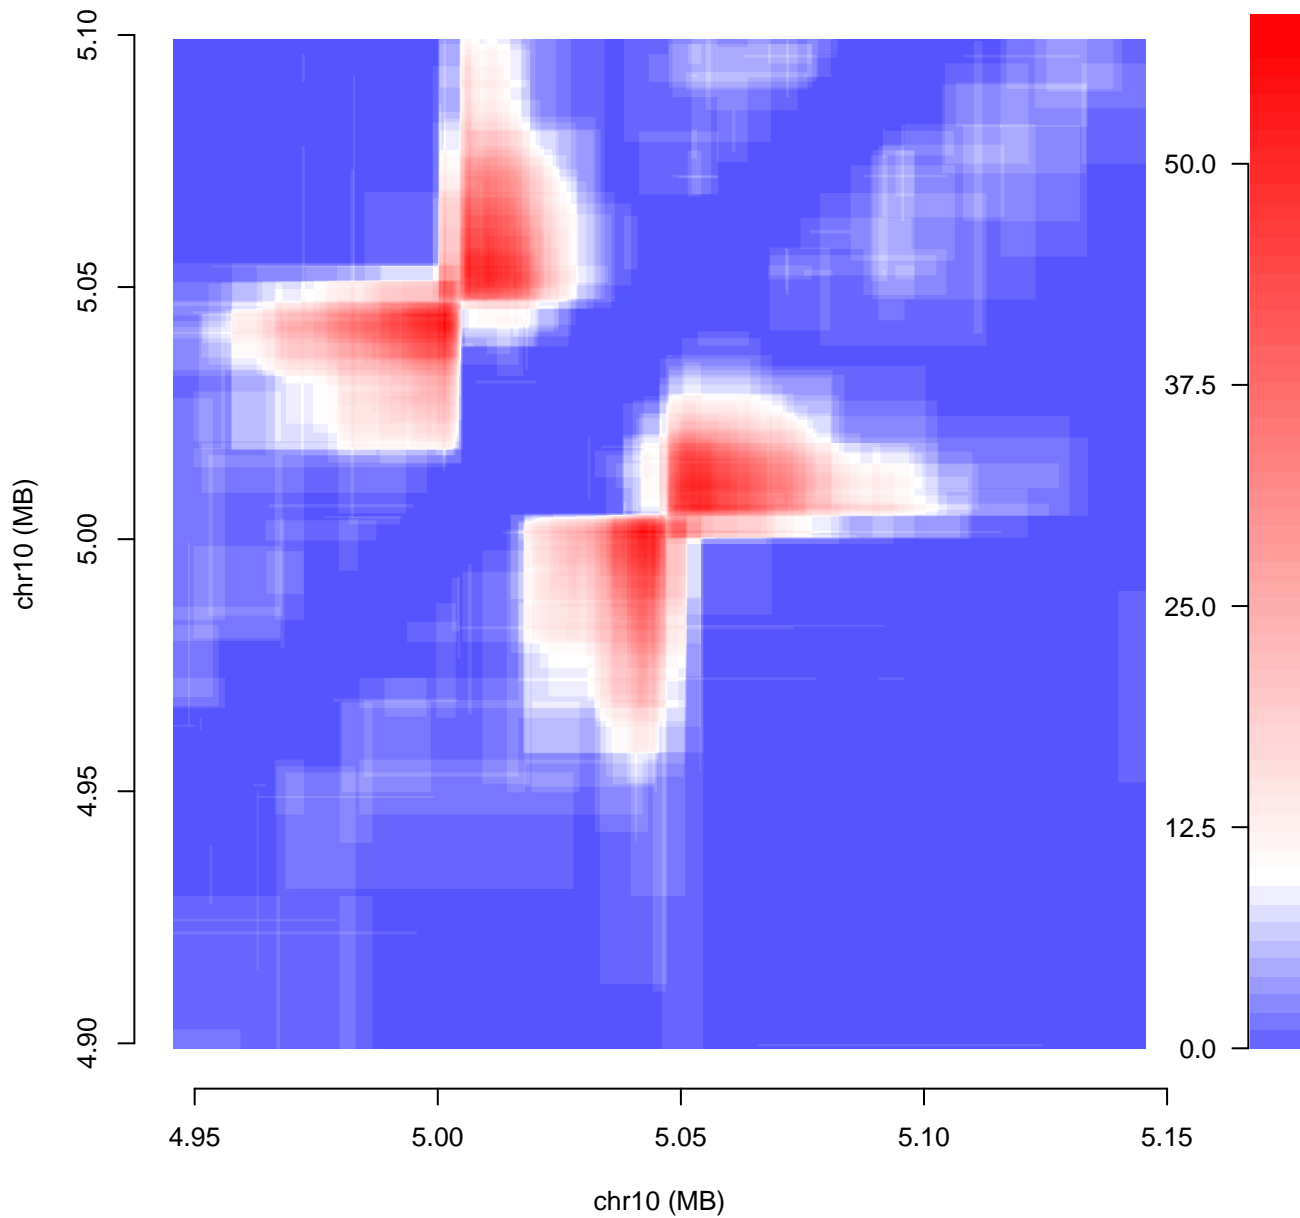

Supplement: Supplemental_Data.zip [file event_286.pdf › event_286.pdf]

Barcode

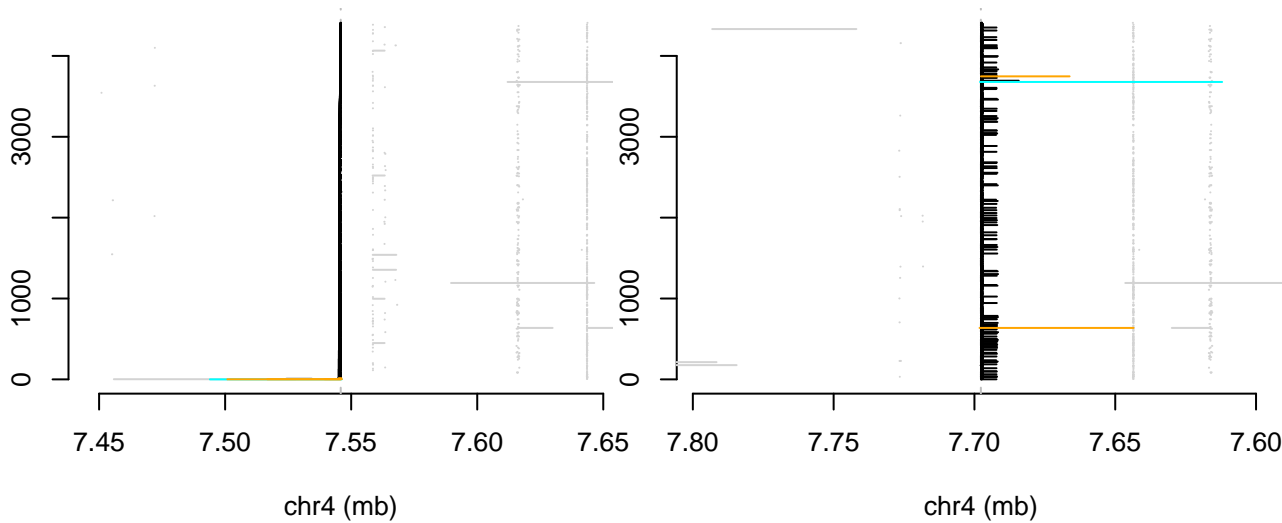

Copy number

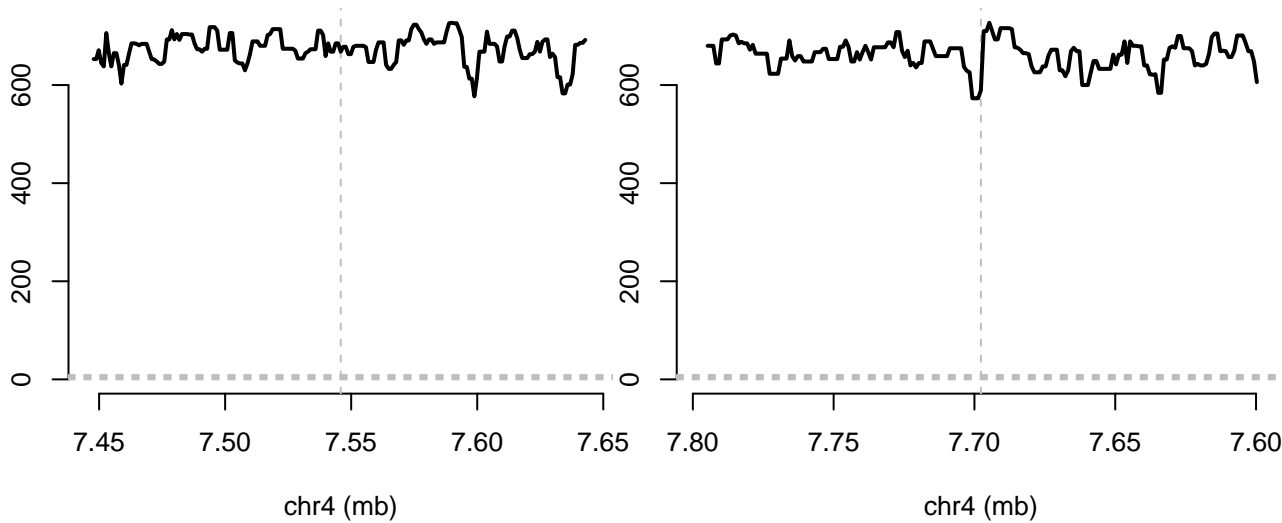

K562 chr4:7,545,858::chr4:7,697,716++

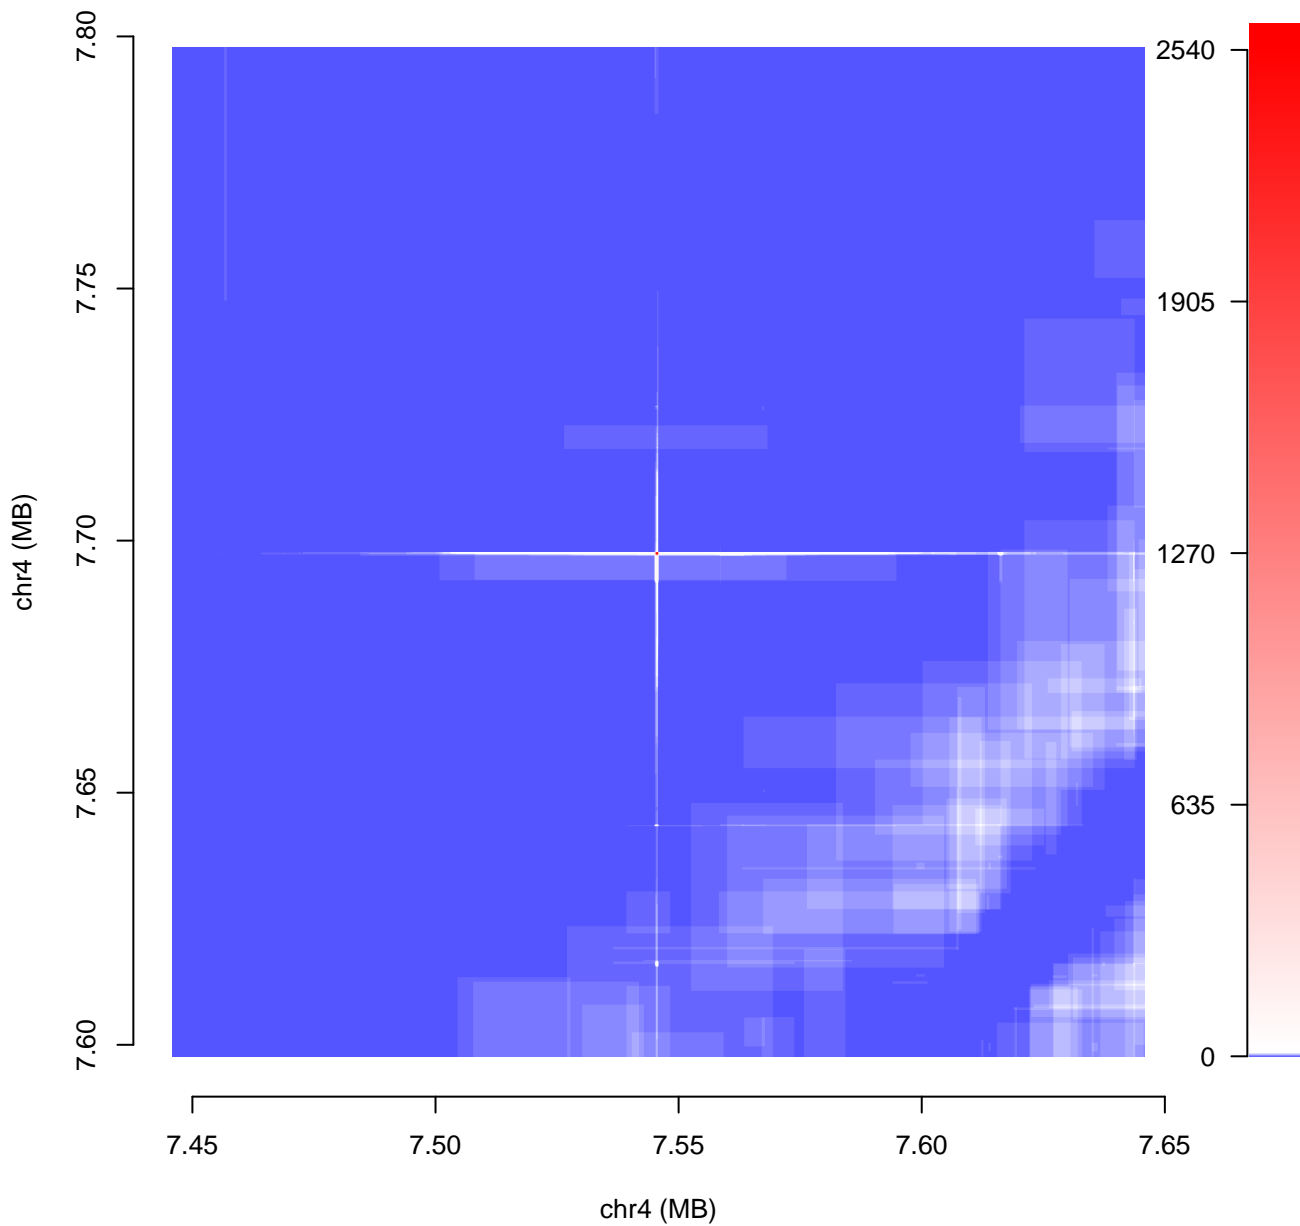

Supplement: Supplemental_Data.zip [file event_287.pdf › event_287.pdf]

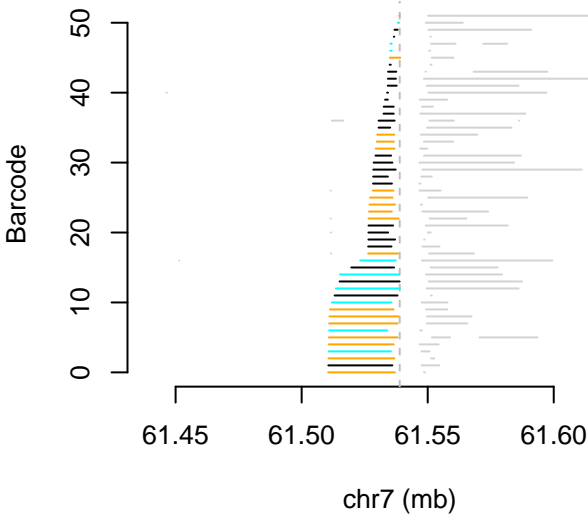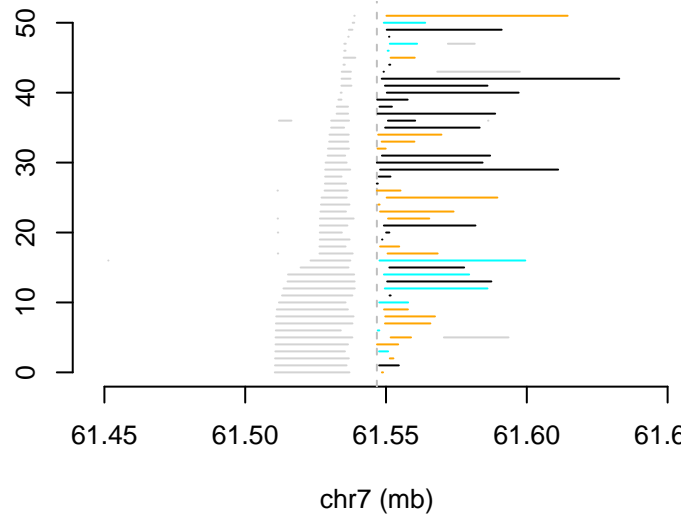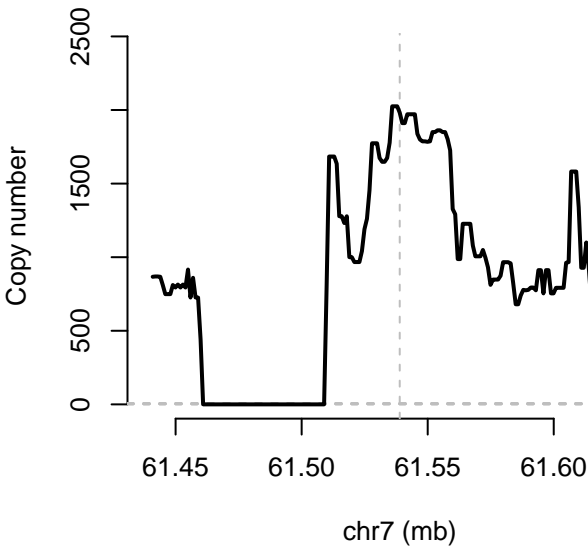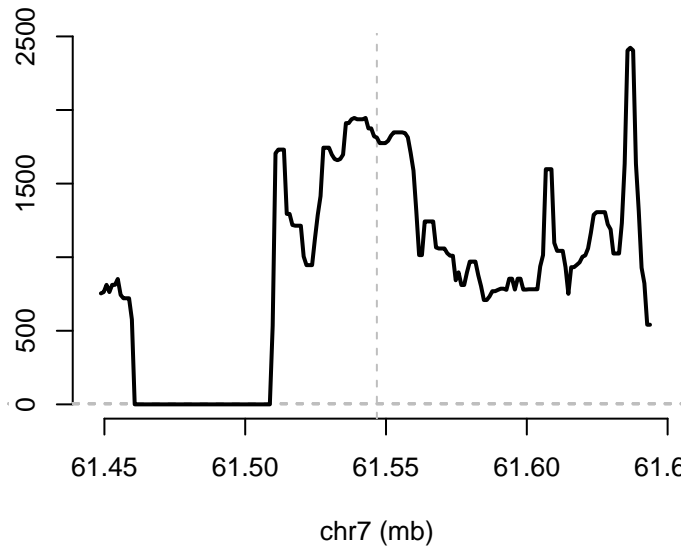

K562 chr7:61,546,756::chr7:61,538,911-+

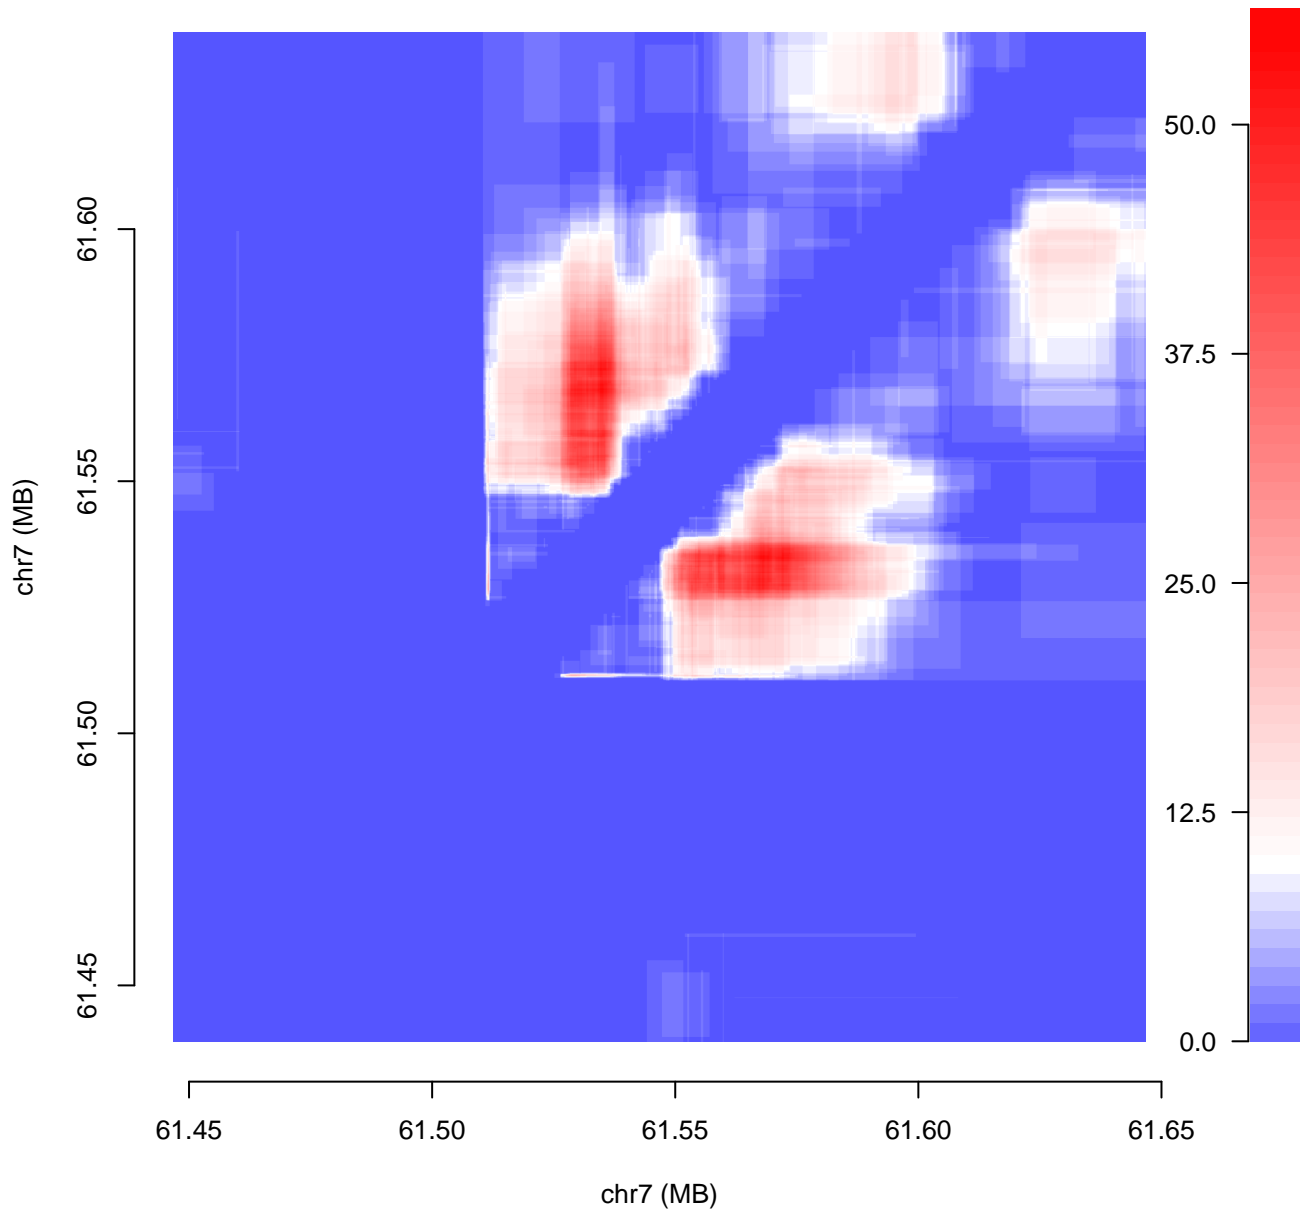

Supplement: Supplemental_Data.zip [file event_288.pdf › event_288.pdf]

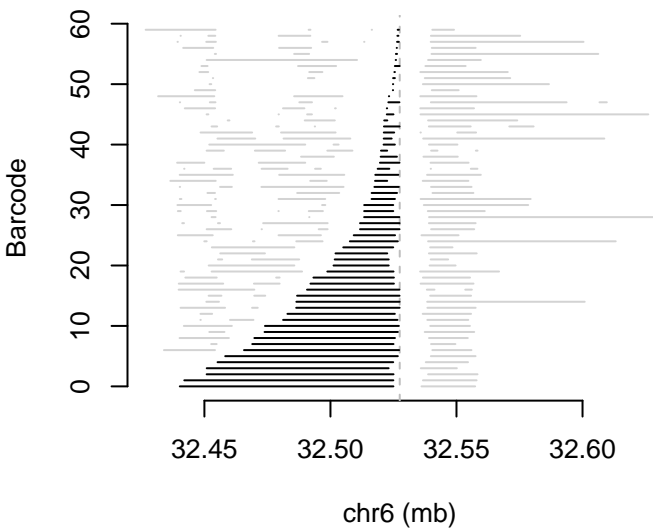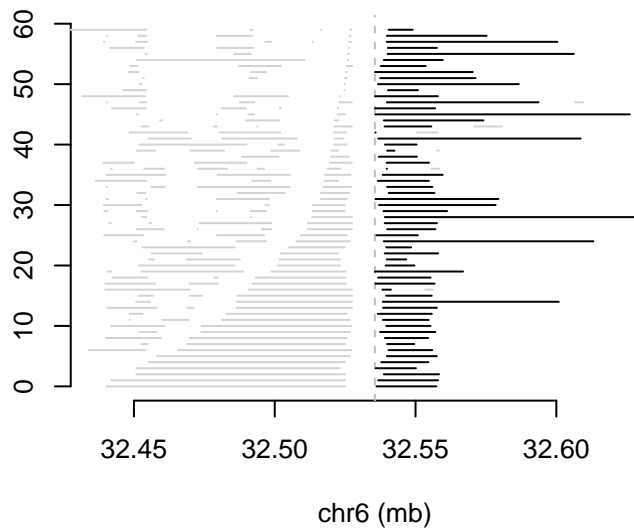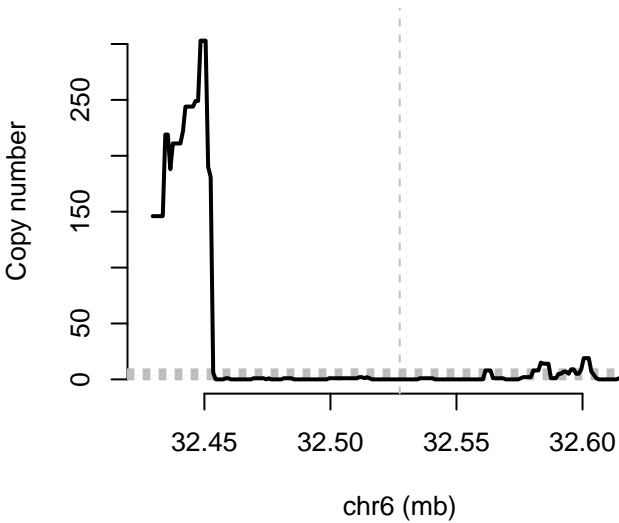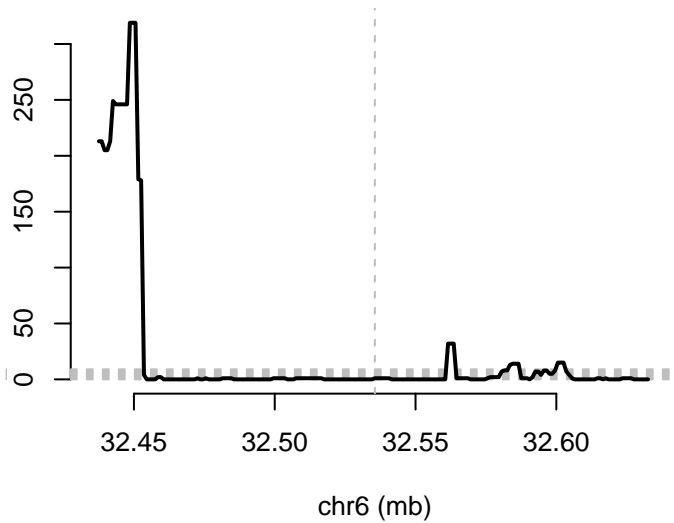

K562 chr6:32,527,491::chr6:32,535,563+-

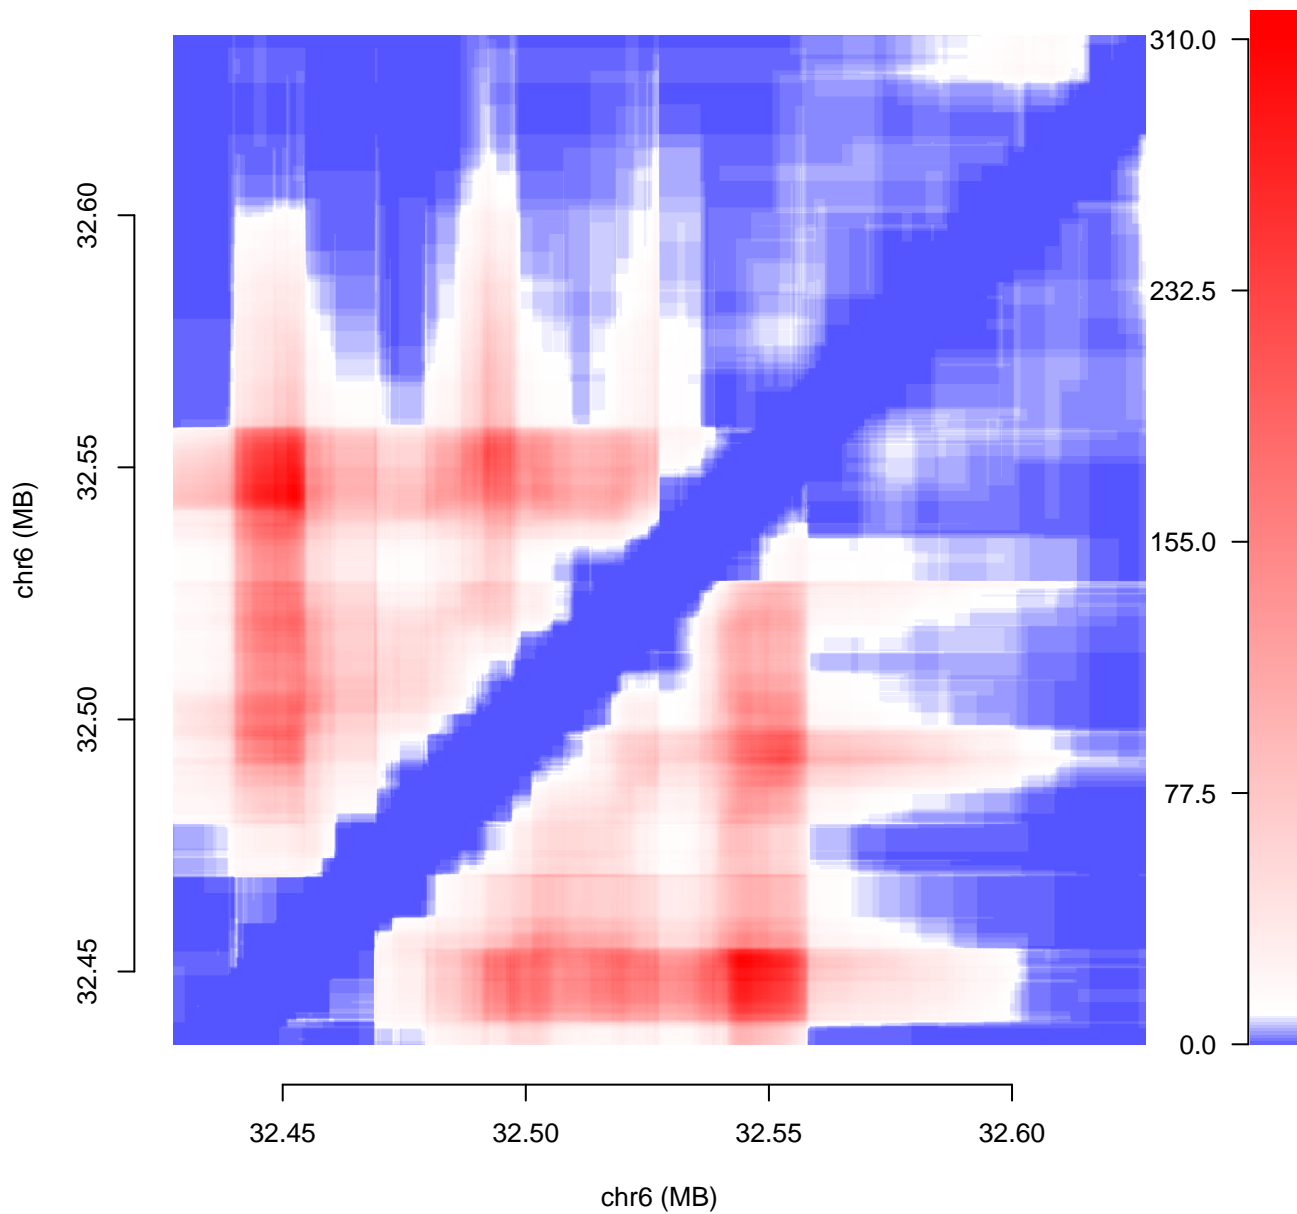

Supplement: Supplemental_Data.zip [file event_289.pdf › event_289.pdf]

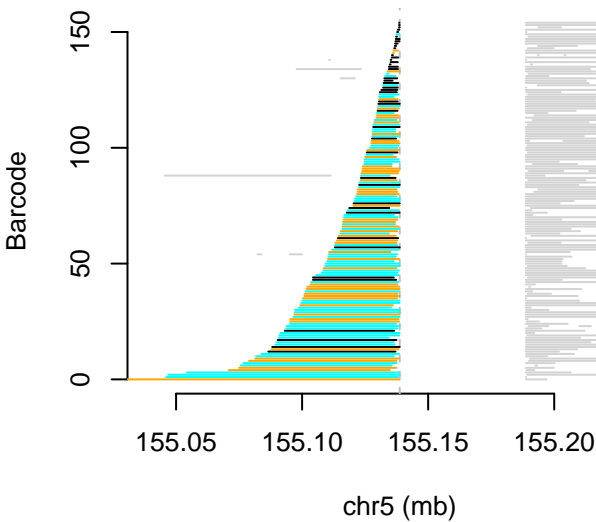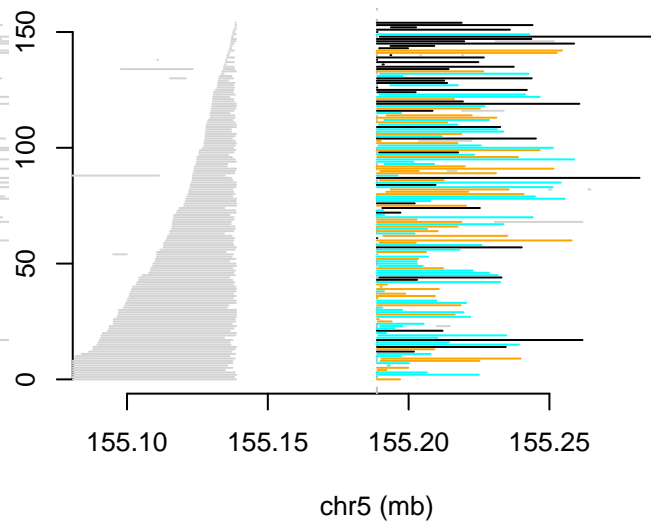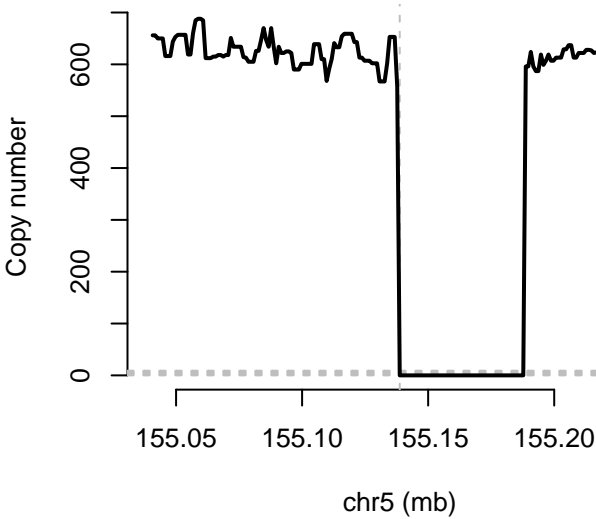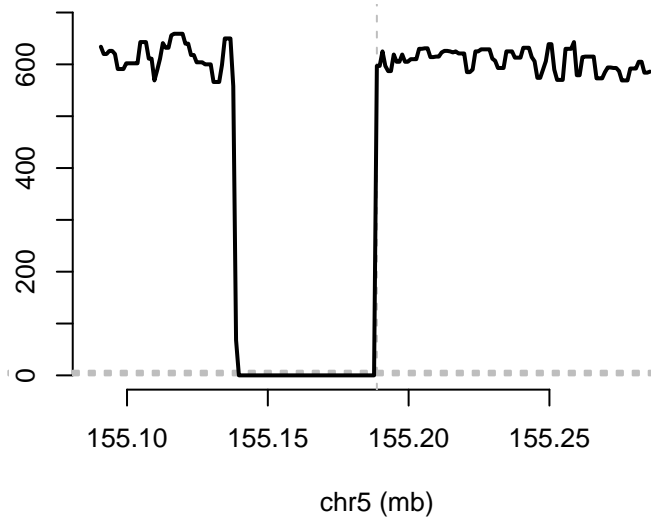

K562 chr5:155,138,727::chr5:155,188,722+-

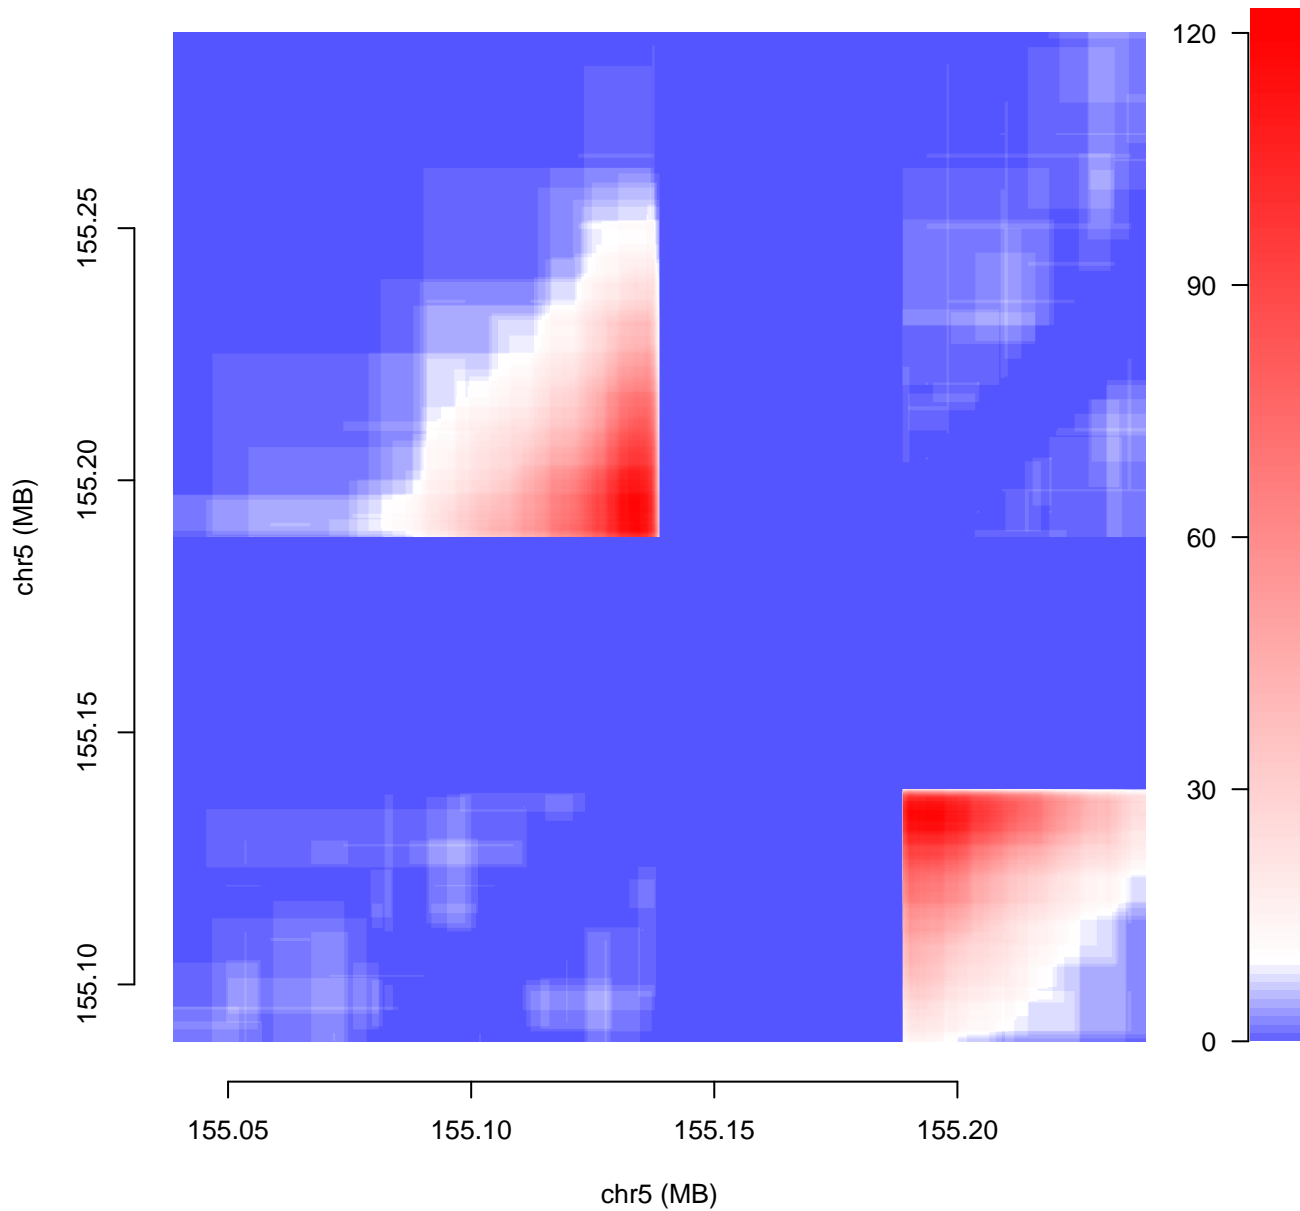

Supplement: Supplemental_Data.zip [file event_29.pdf › event_29.pdf]

Barcode

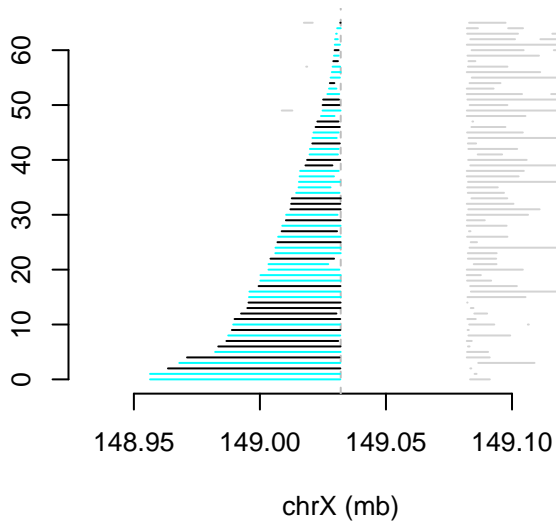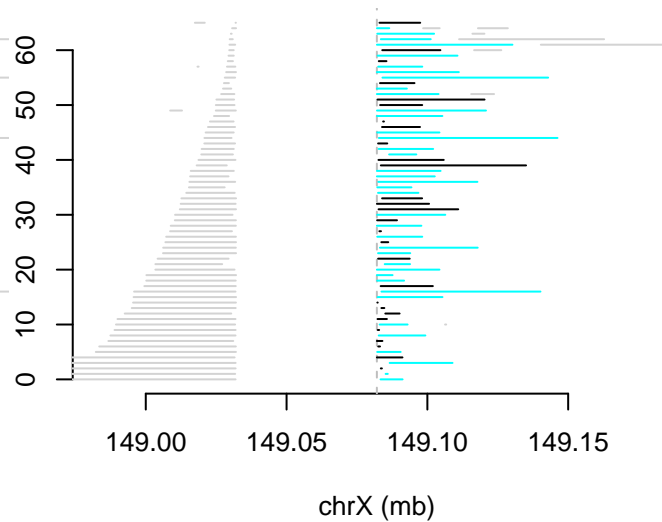

Copy number

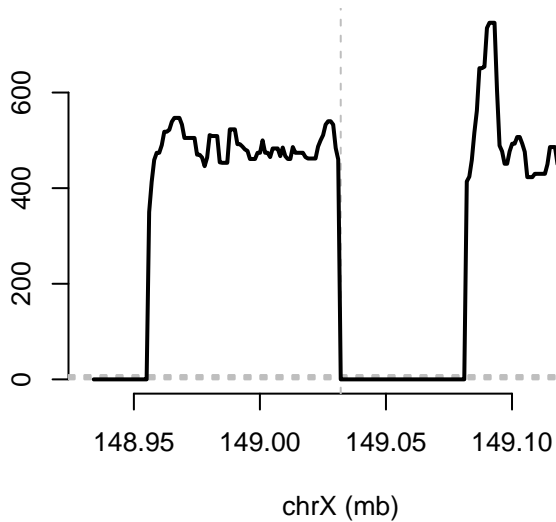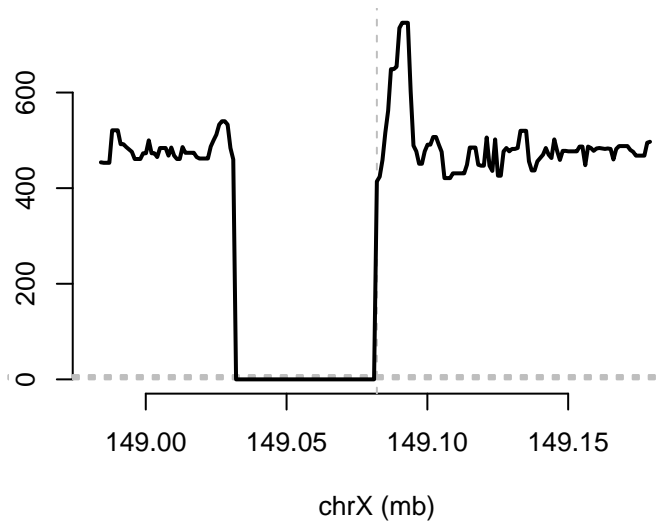

K562 chrX:149,082,062::chrX:149,032,063--+

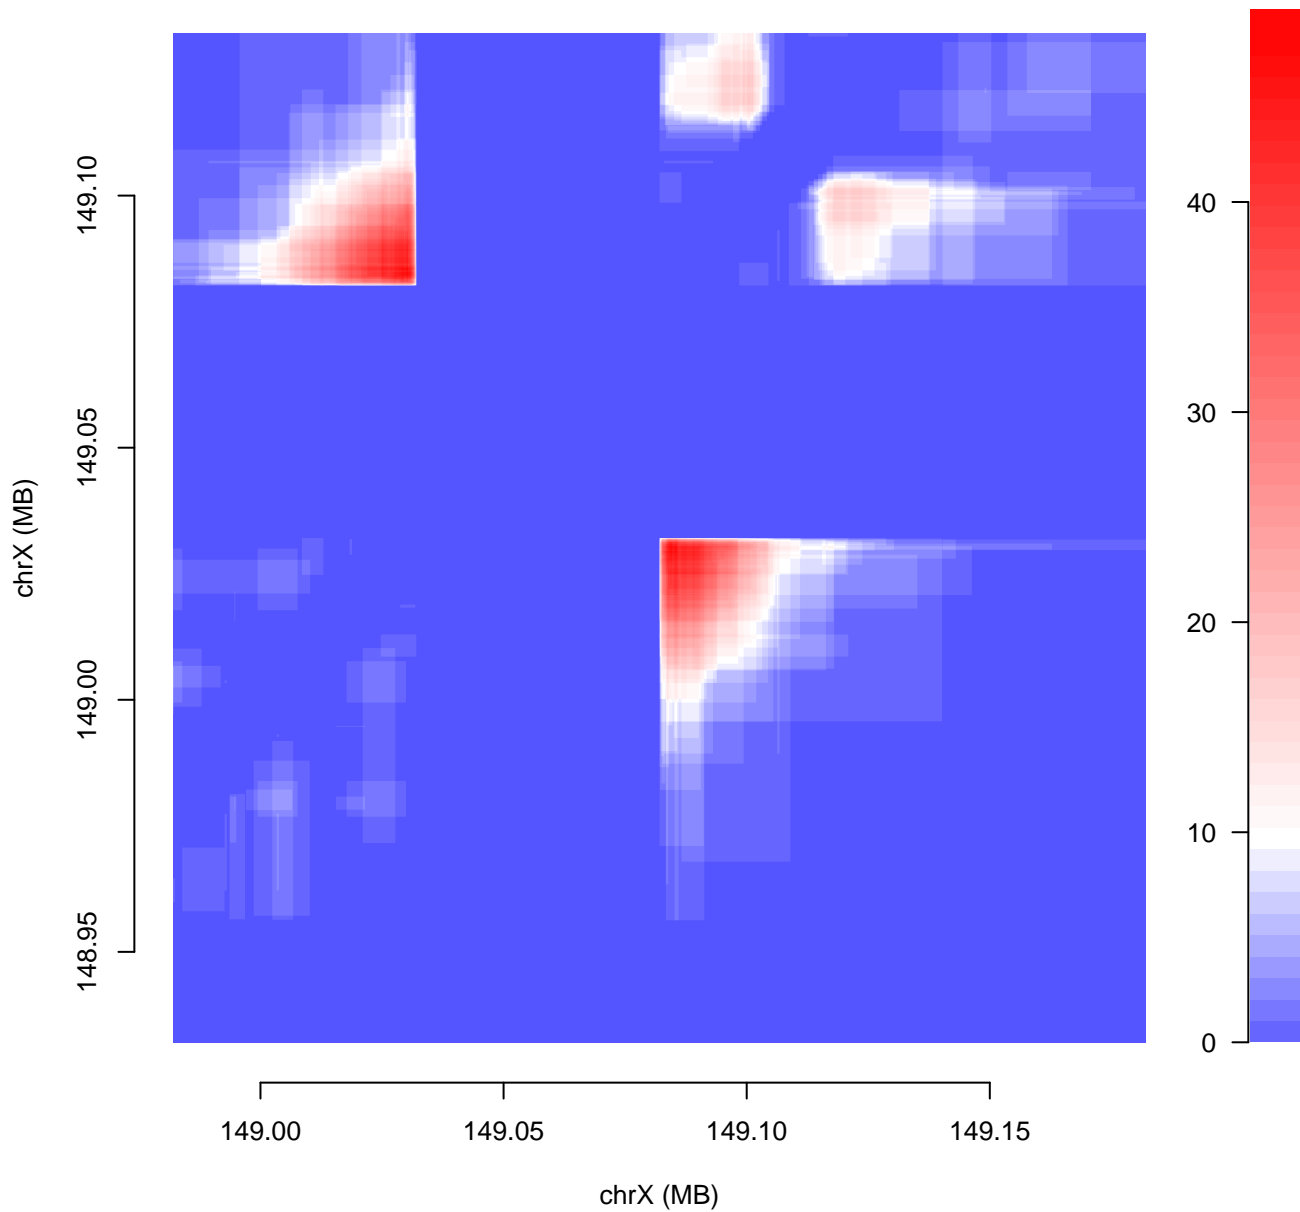

Supplement: Supplemental_Data.zip [file event_290.pdf › event_290.pdf]

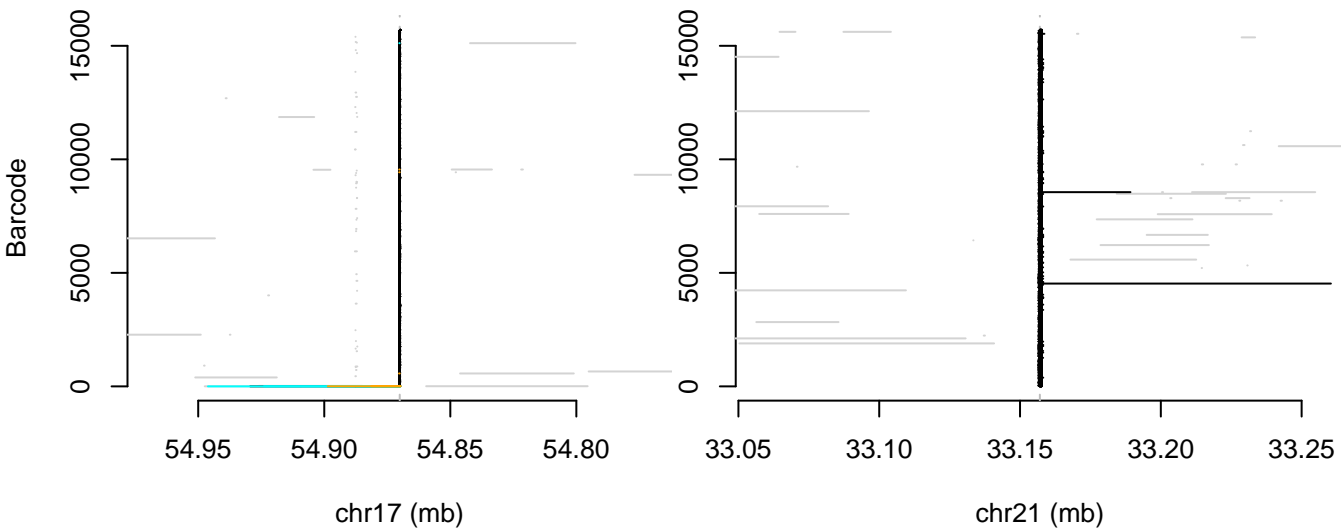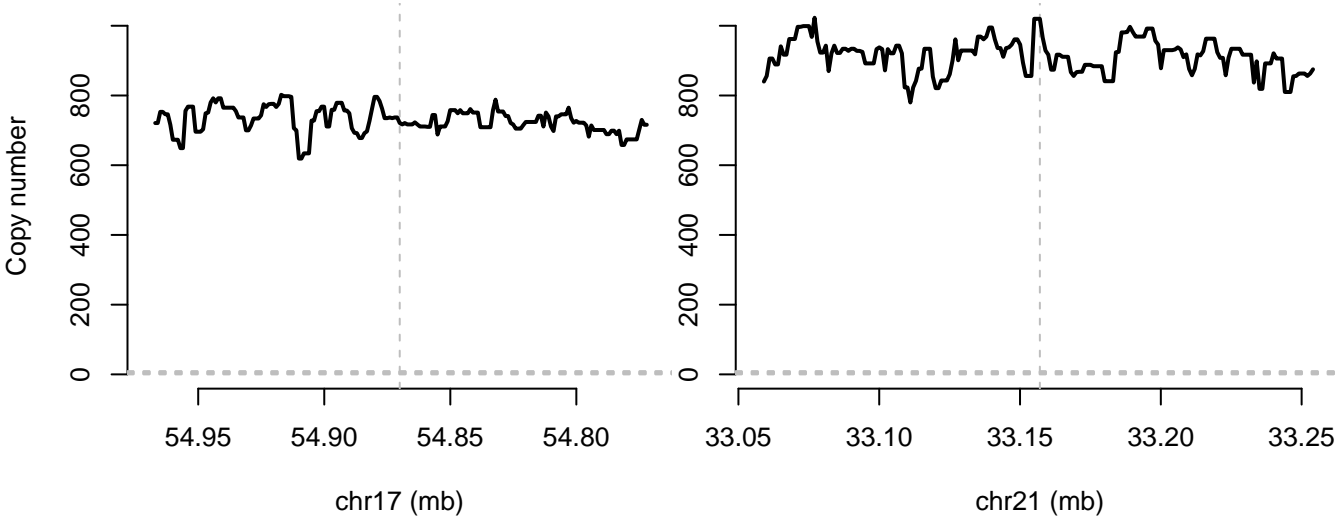

K562 chr21:33,157,050::chr17:54,870,058--

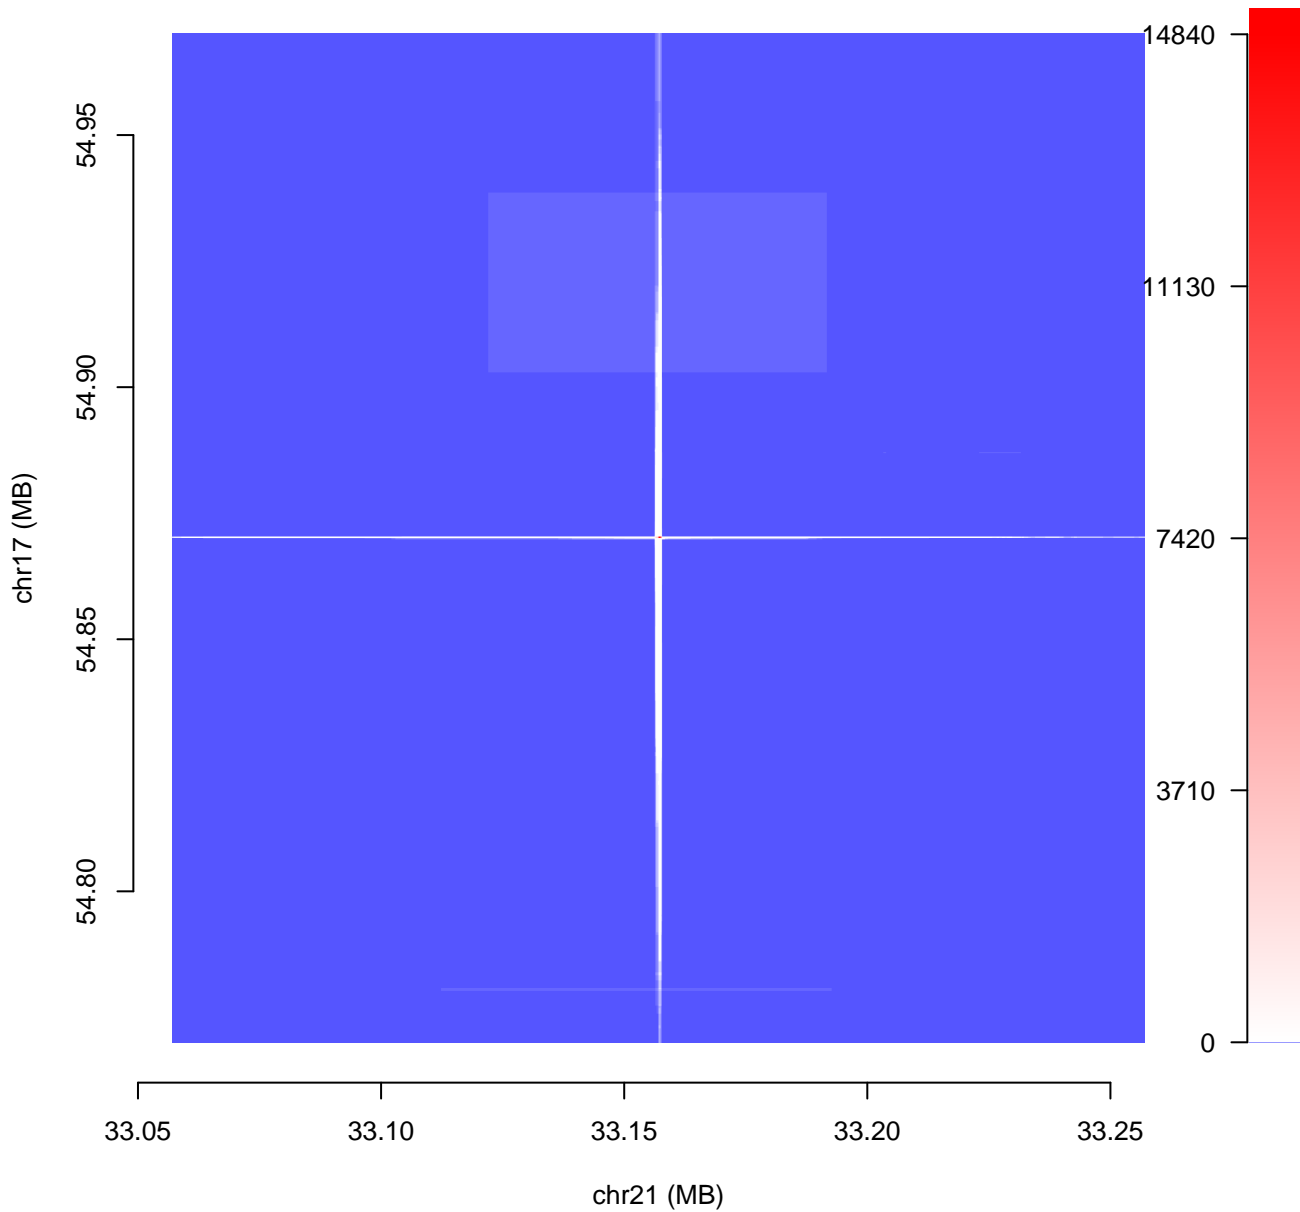

Supplement: Supplemental_Data.zip [file event_291.pdf › event_291.pdf]

Barcode

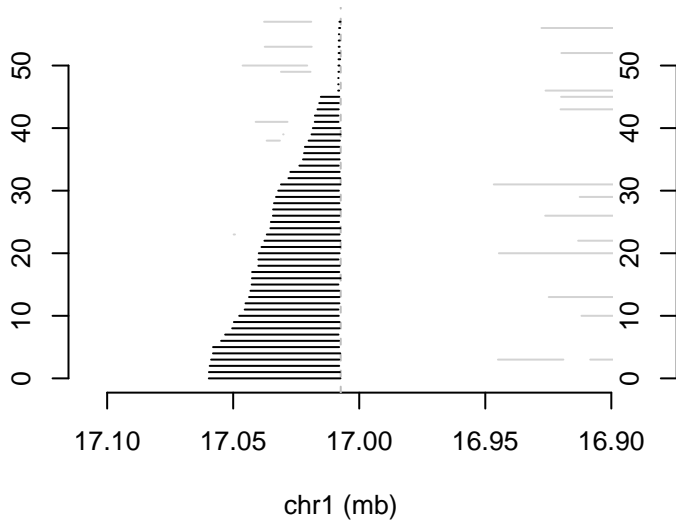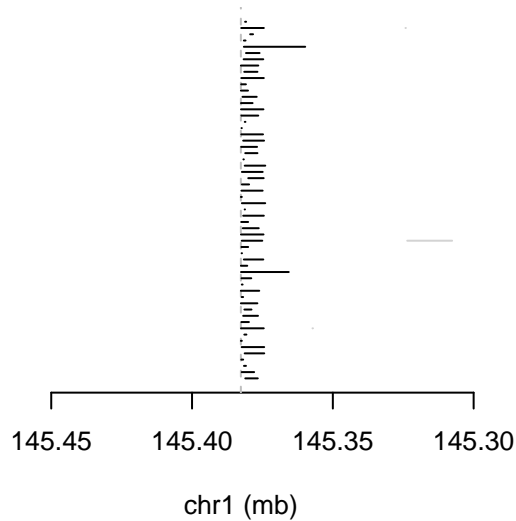

Copy number

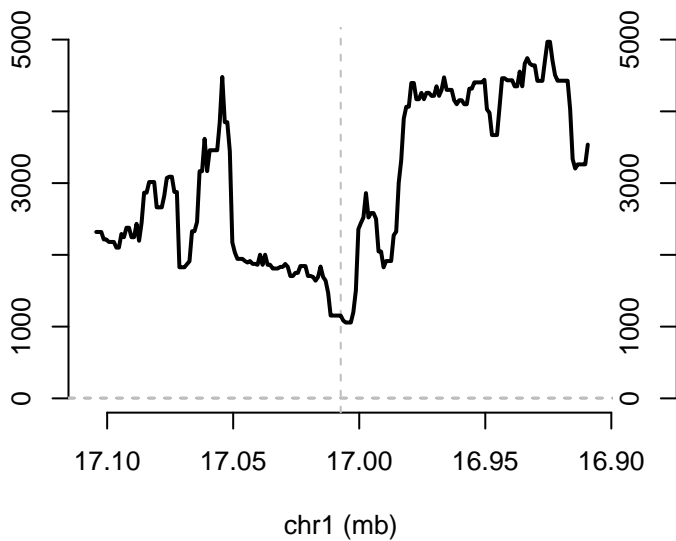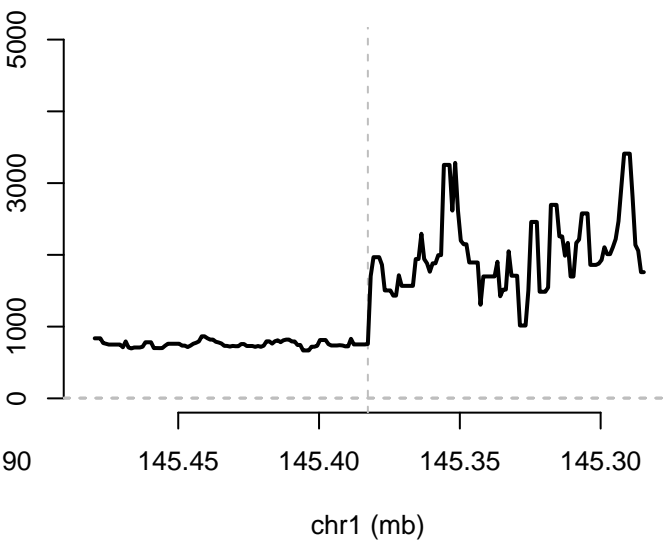

K562 chr1:145,382,660::chr1:17,007,336+-

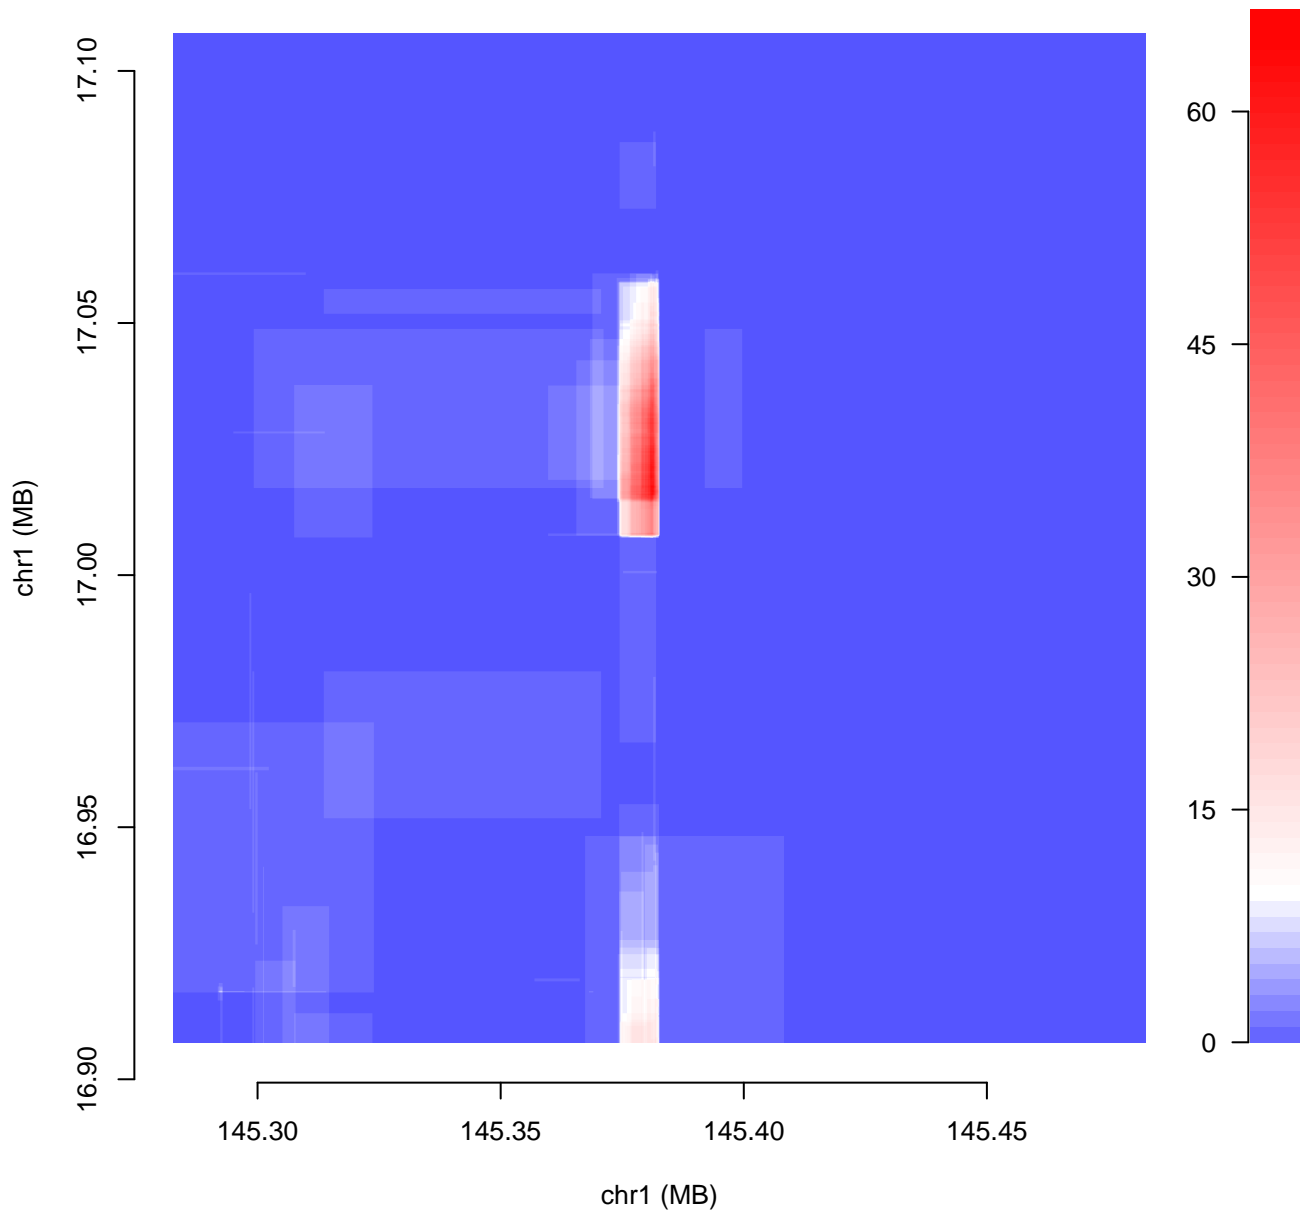

Supplement: Supplemental_Data.zip [file event_292.pdf › event_292.pdf]

Barcode

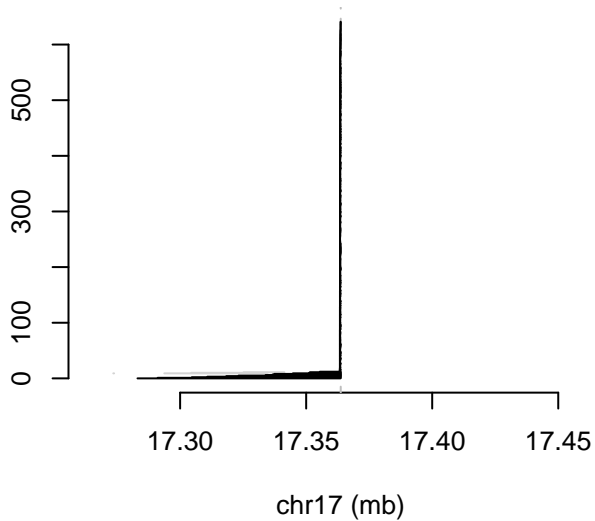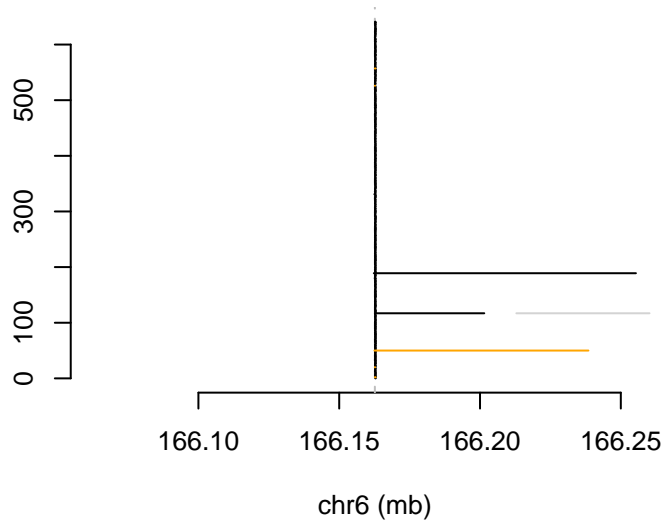

Copy number

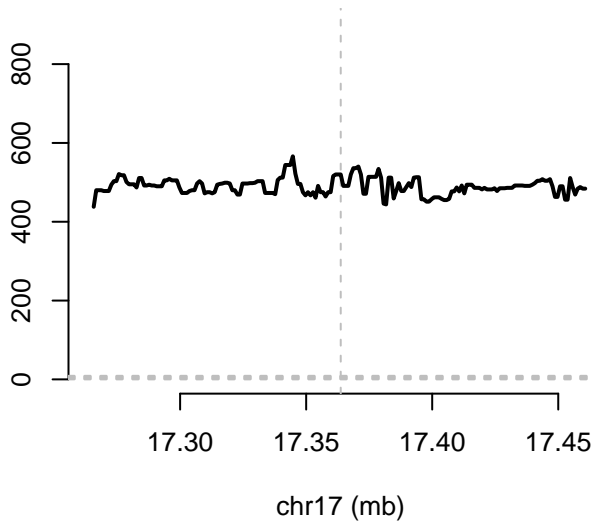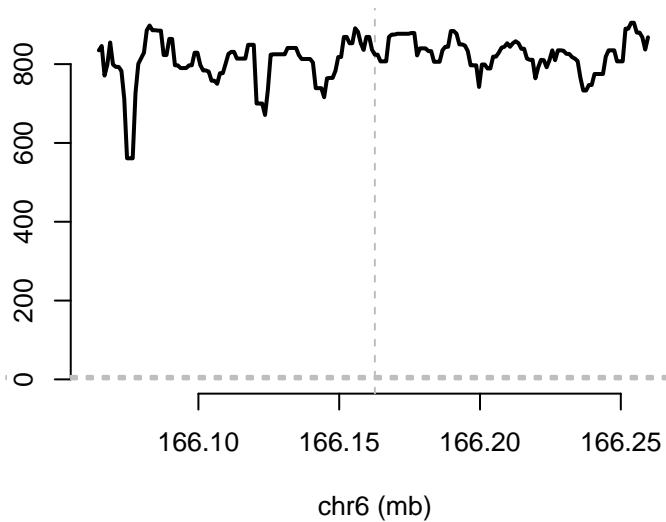

K562 chr6:166,162,665::chr17:17,363,716-+

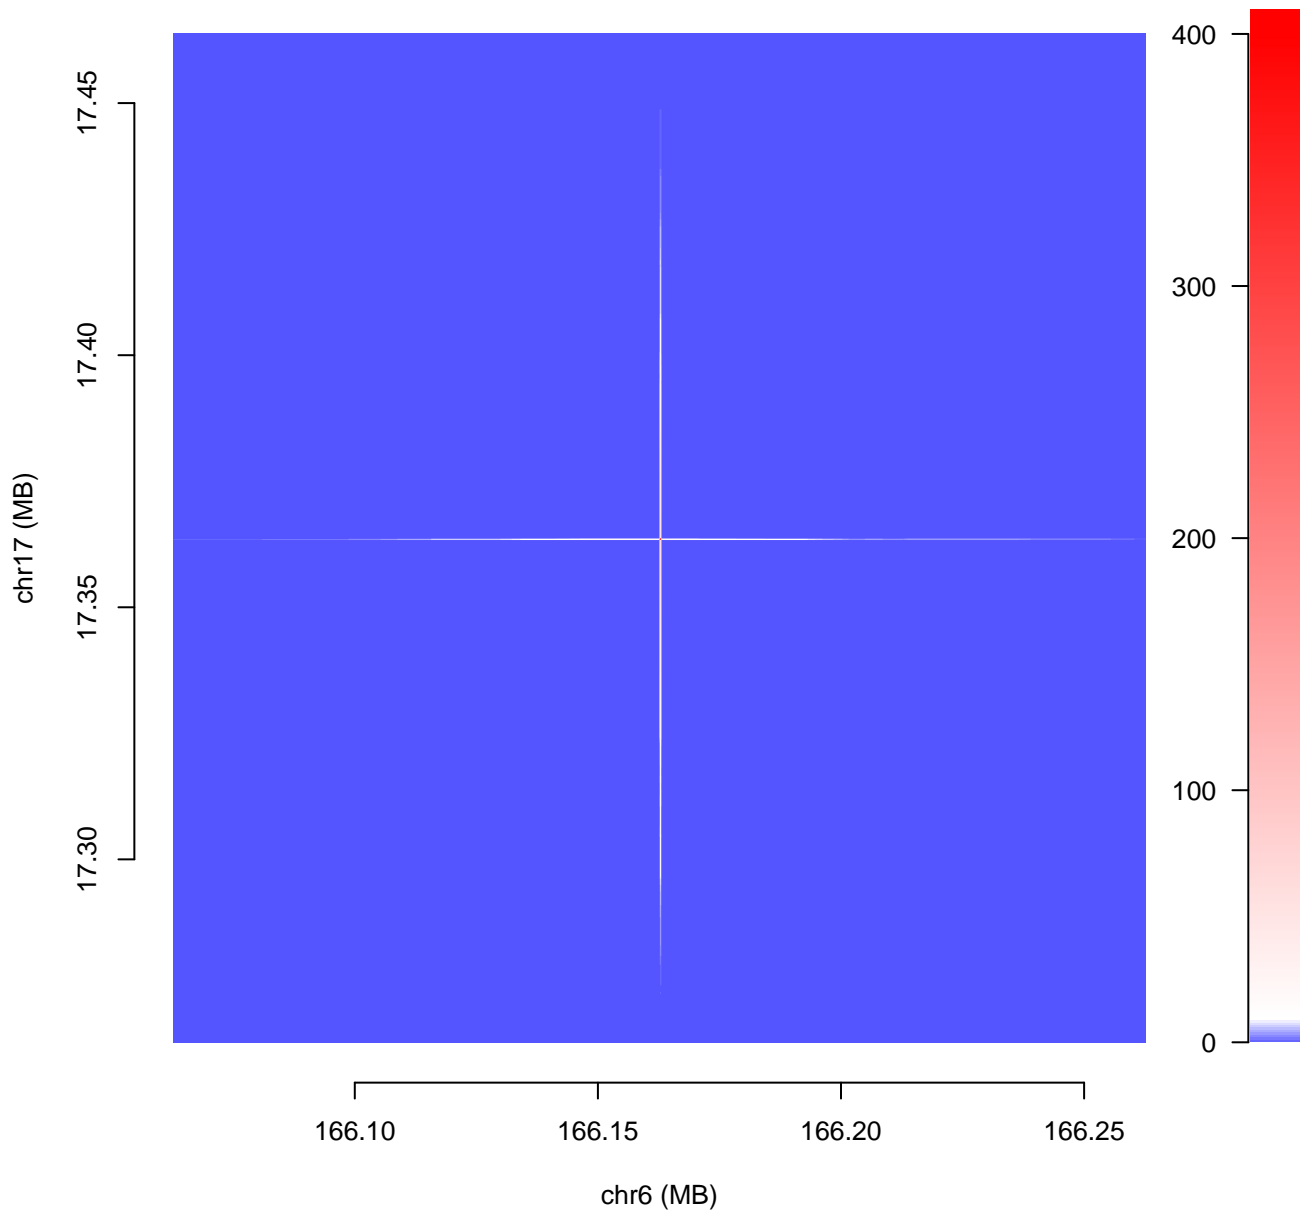

Supplement: Supplemental_Data.zip [file event_293.pdf › event_293.pdf]

Barcode

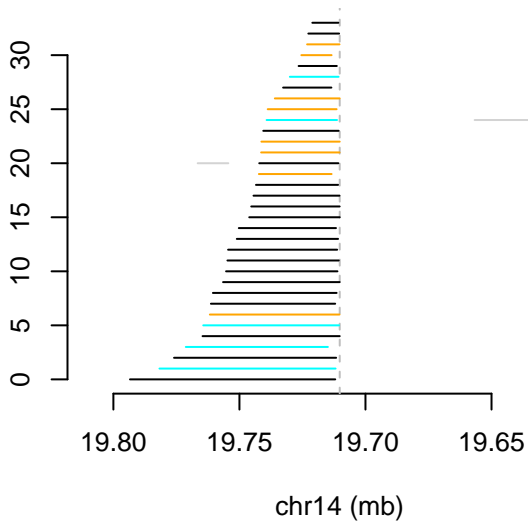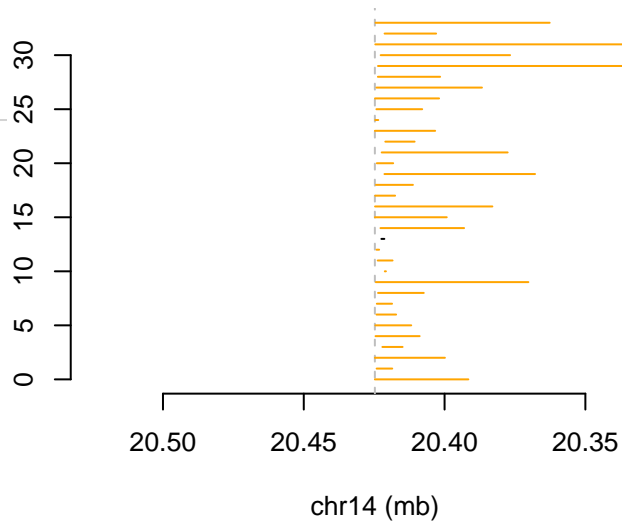

Copy number

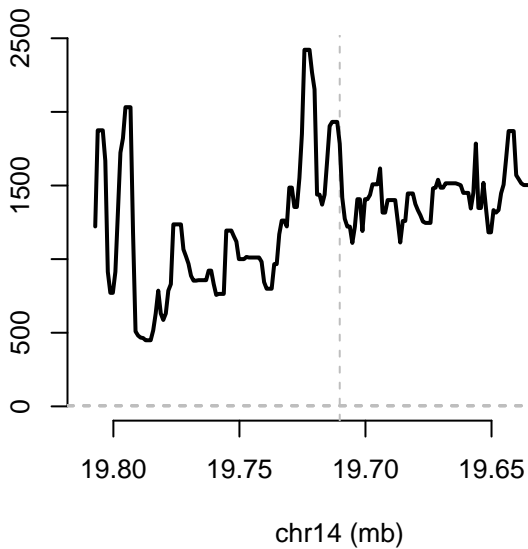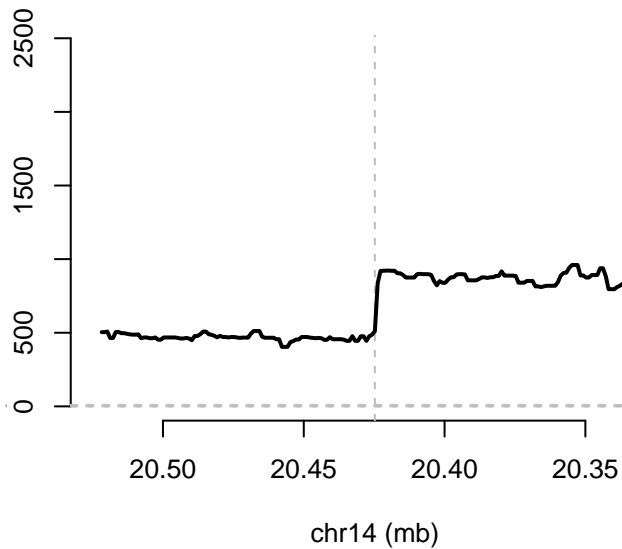

K562 chr14:20,424,756::chr14:19,710,209+-

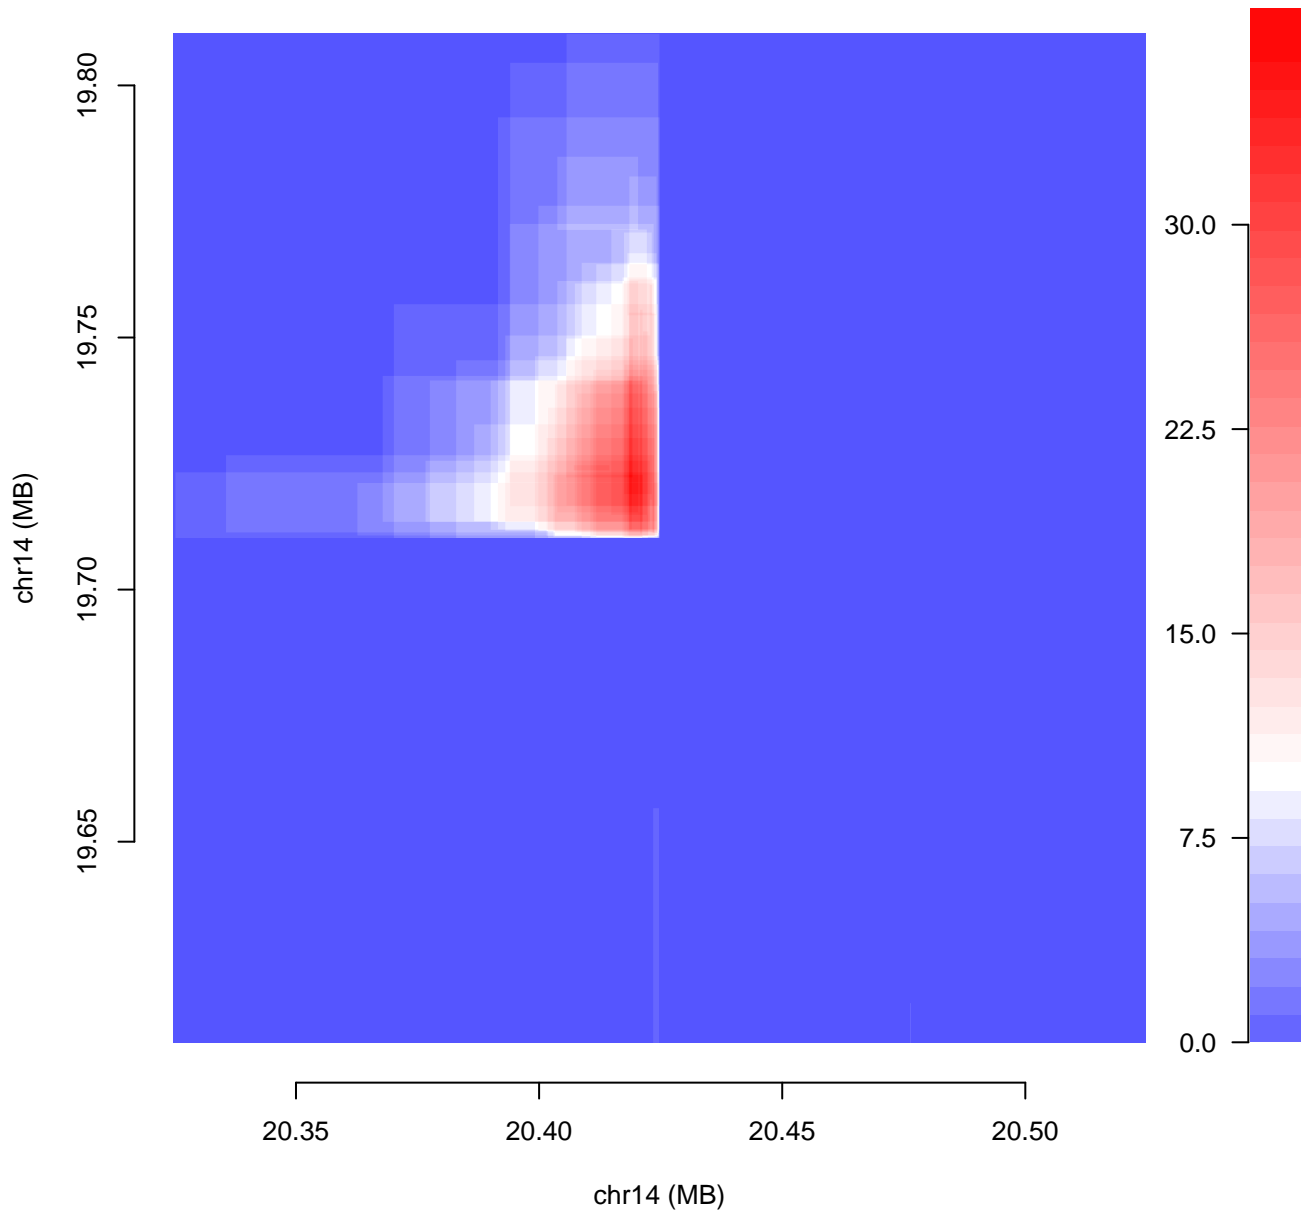

Supplement: Supplemental_Data.zip [file event_294.pdf › event_294.pdf]

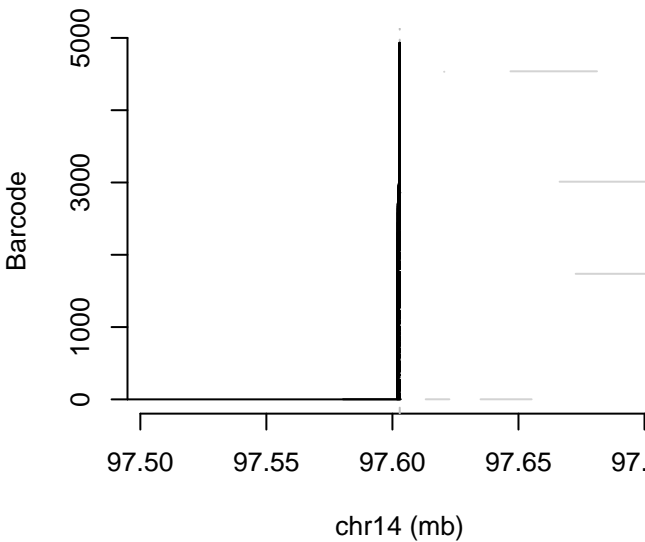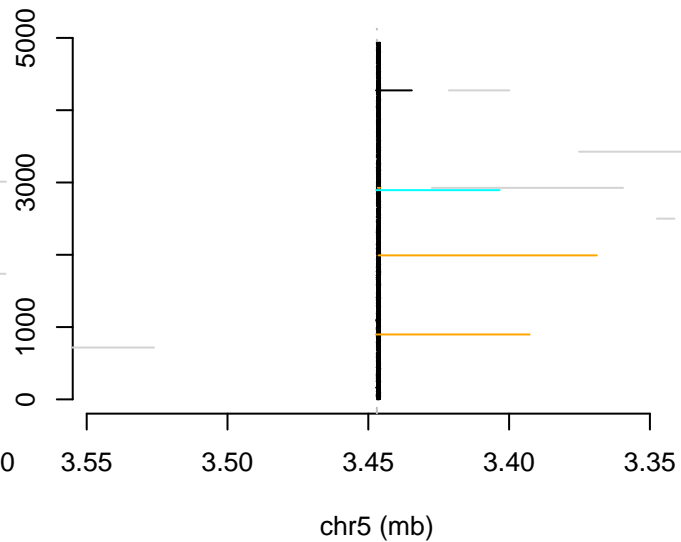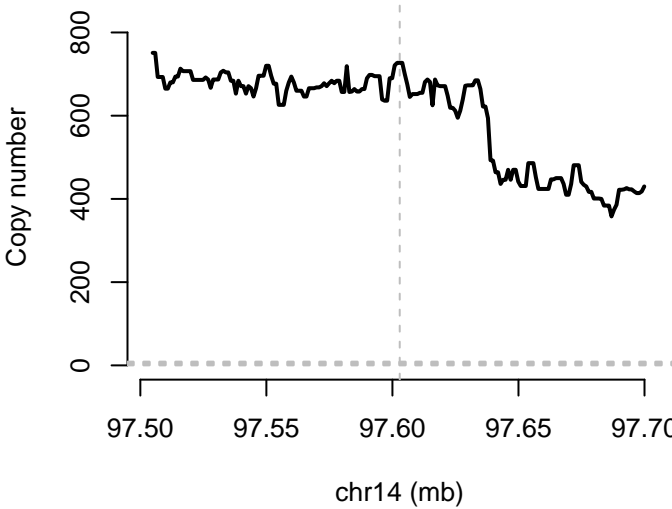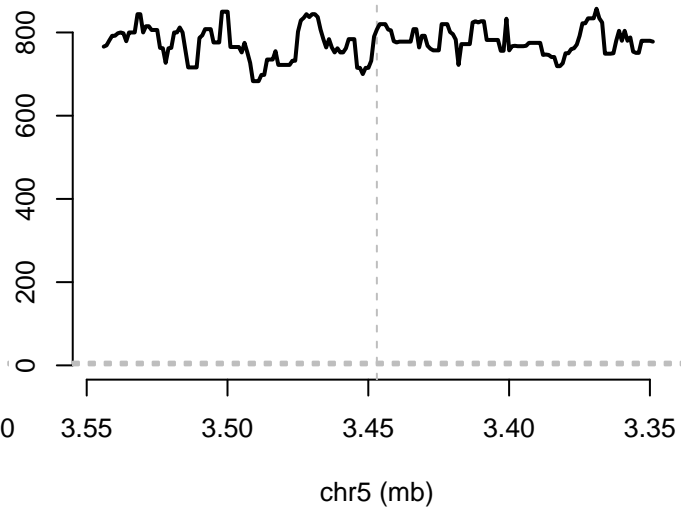

K562 chr5:3,446,957::chr14:97,602,904++

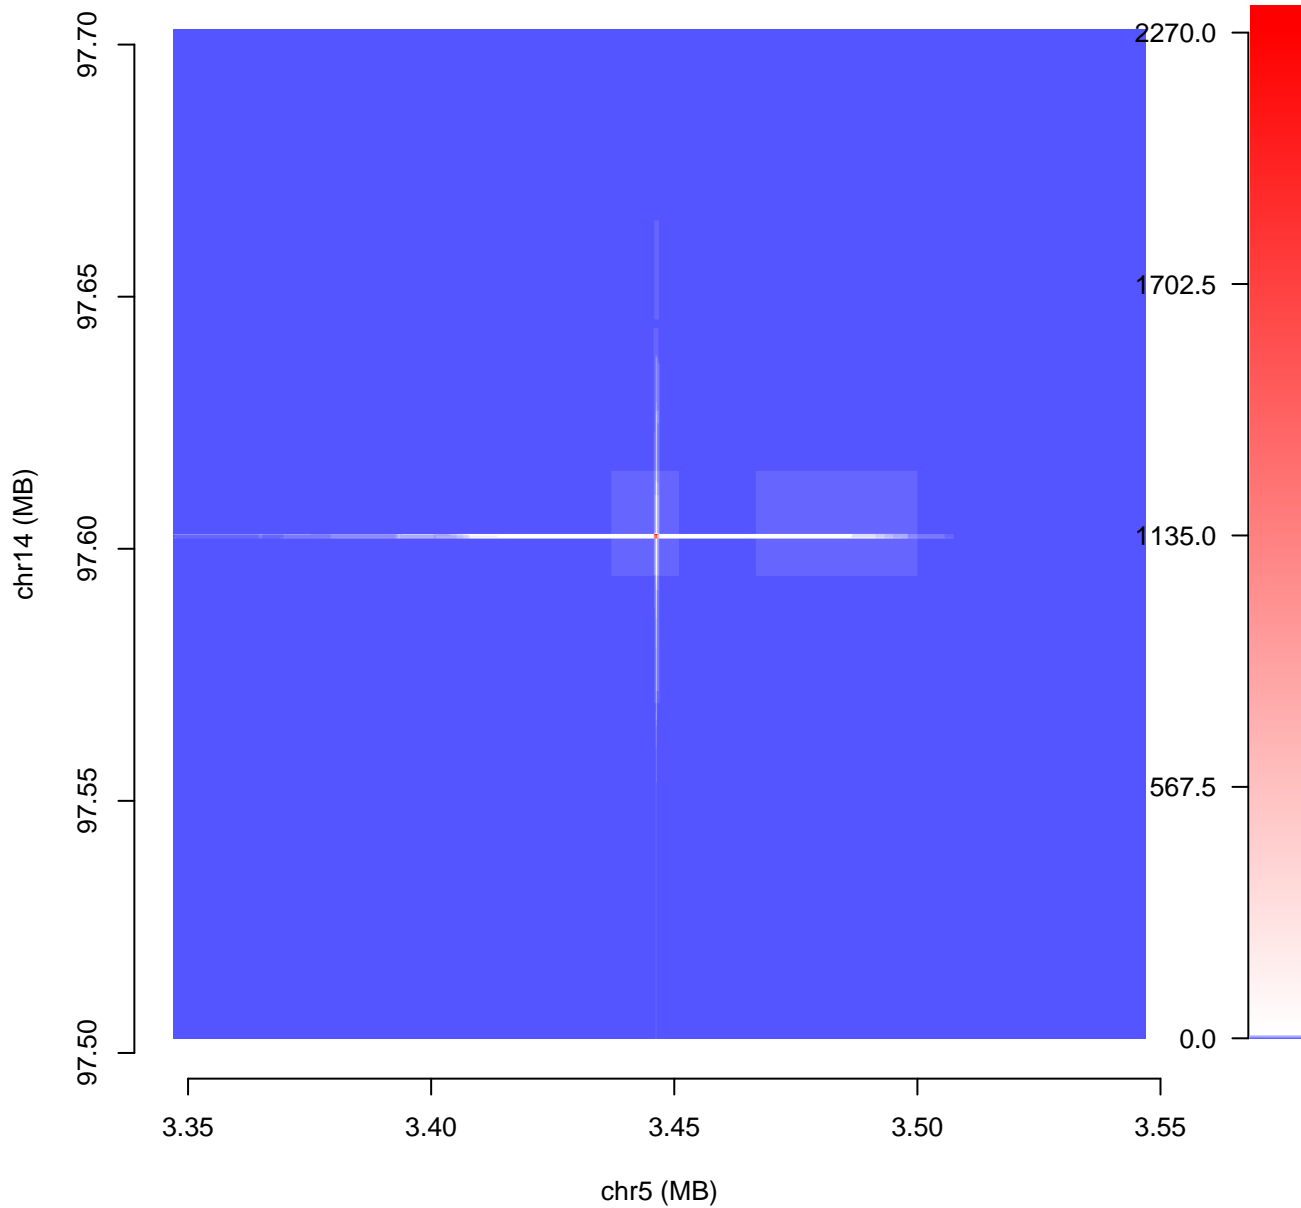

Supplement: Supplemental_Data.zip [file event_295.pdf › event_295.pdf]

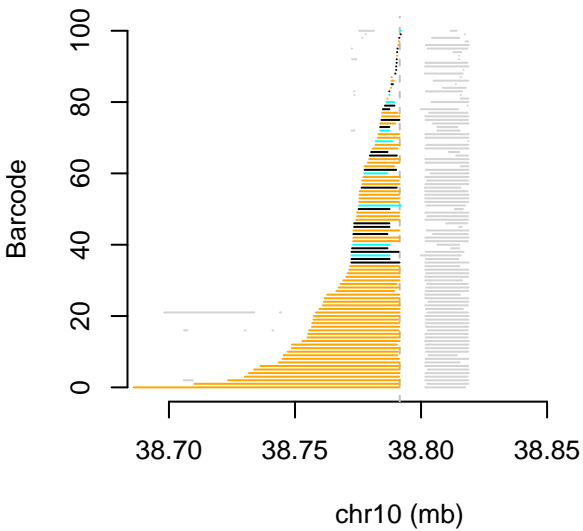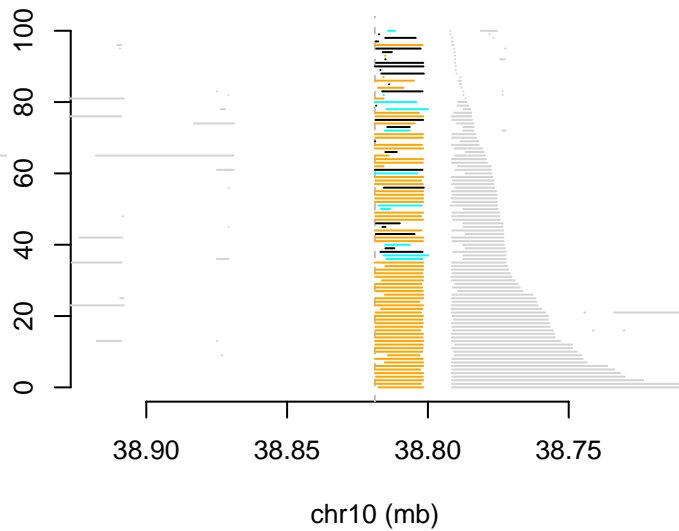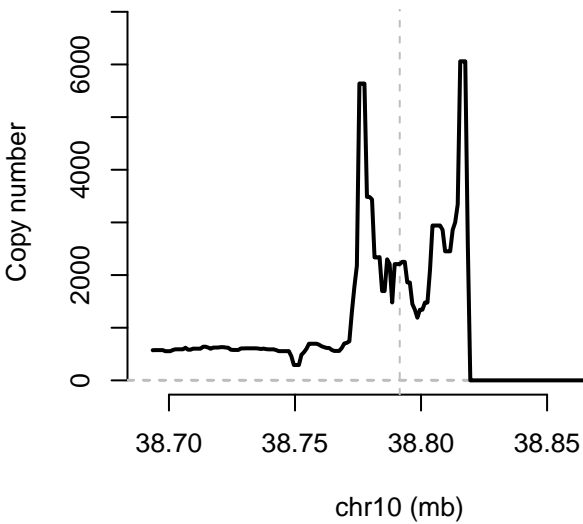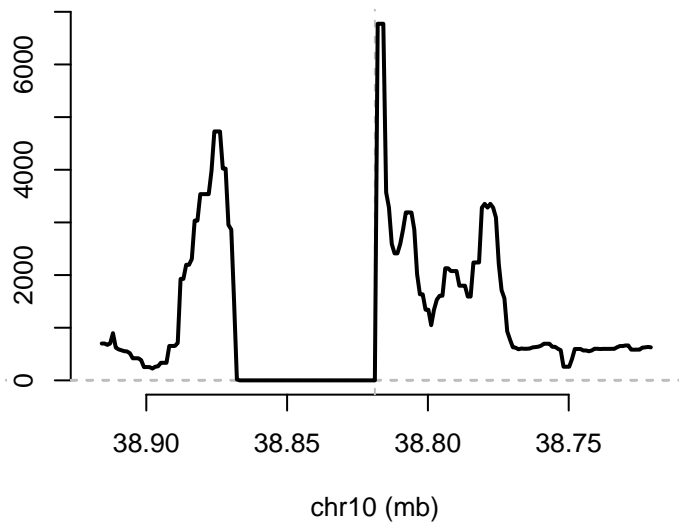

K562 chr10:38,818,836::chr10:38,791,548++

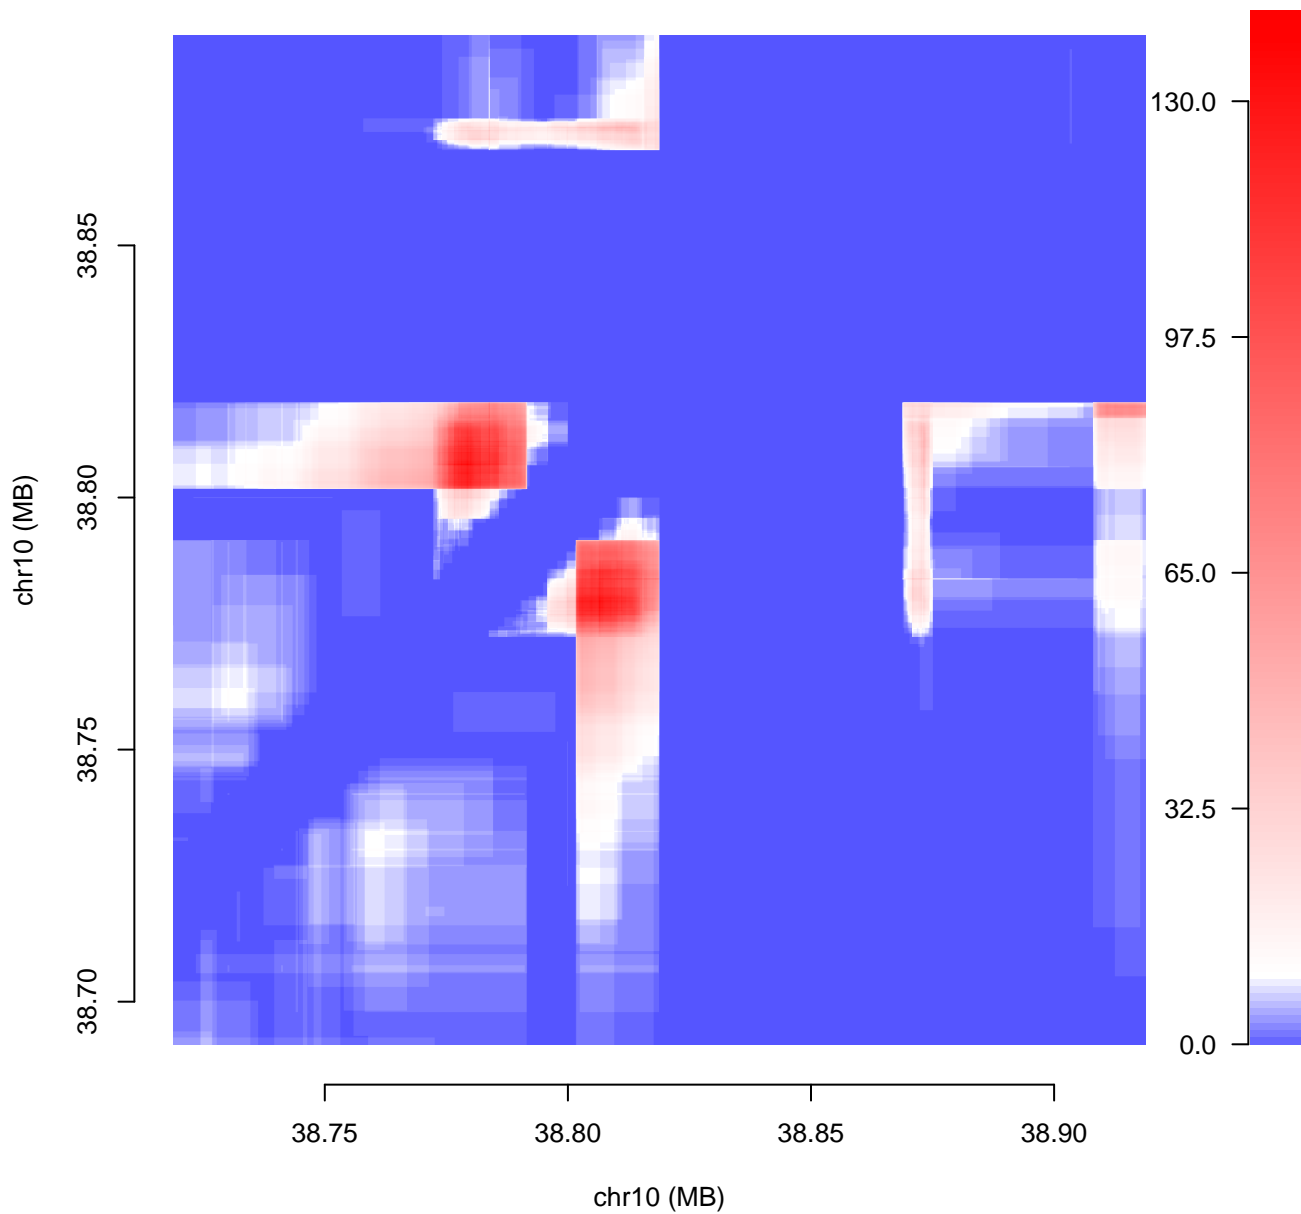

Supplement: Supplemental_Data.zip [file event_296.pdf › event_296.pdf]

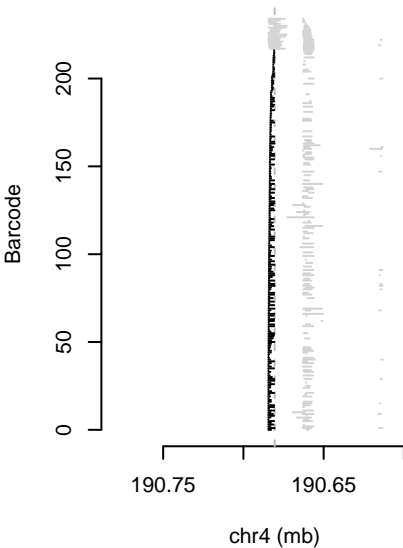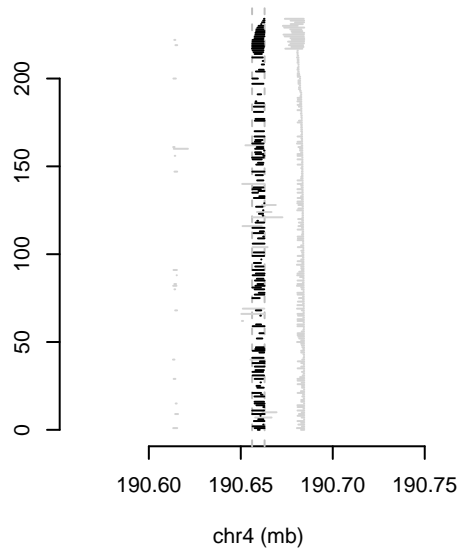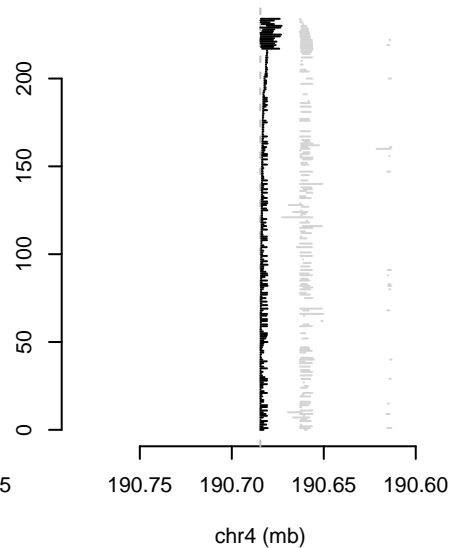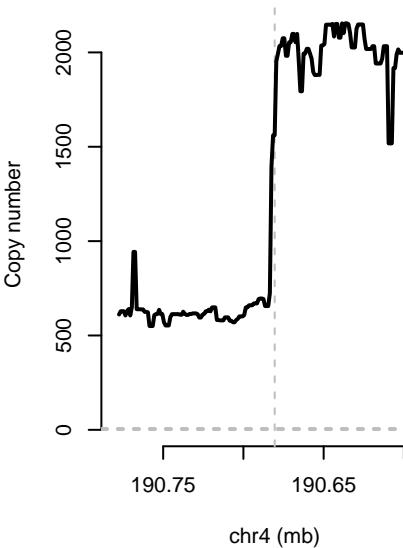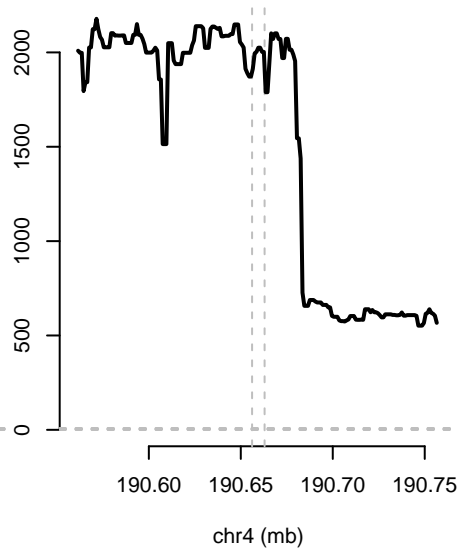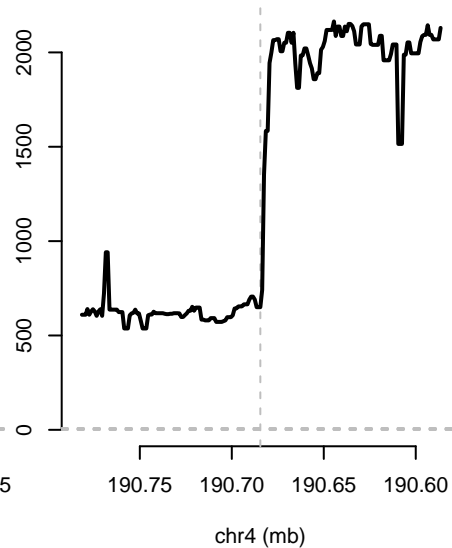

K562 chr4:190,680,510::chr4:190,656,144--

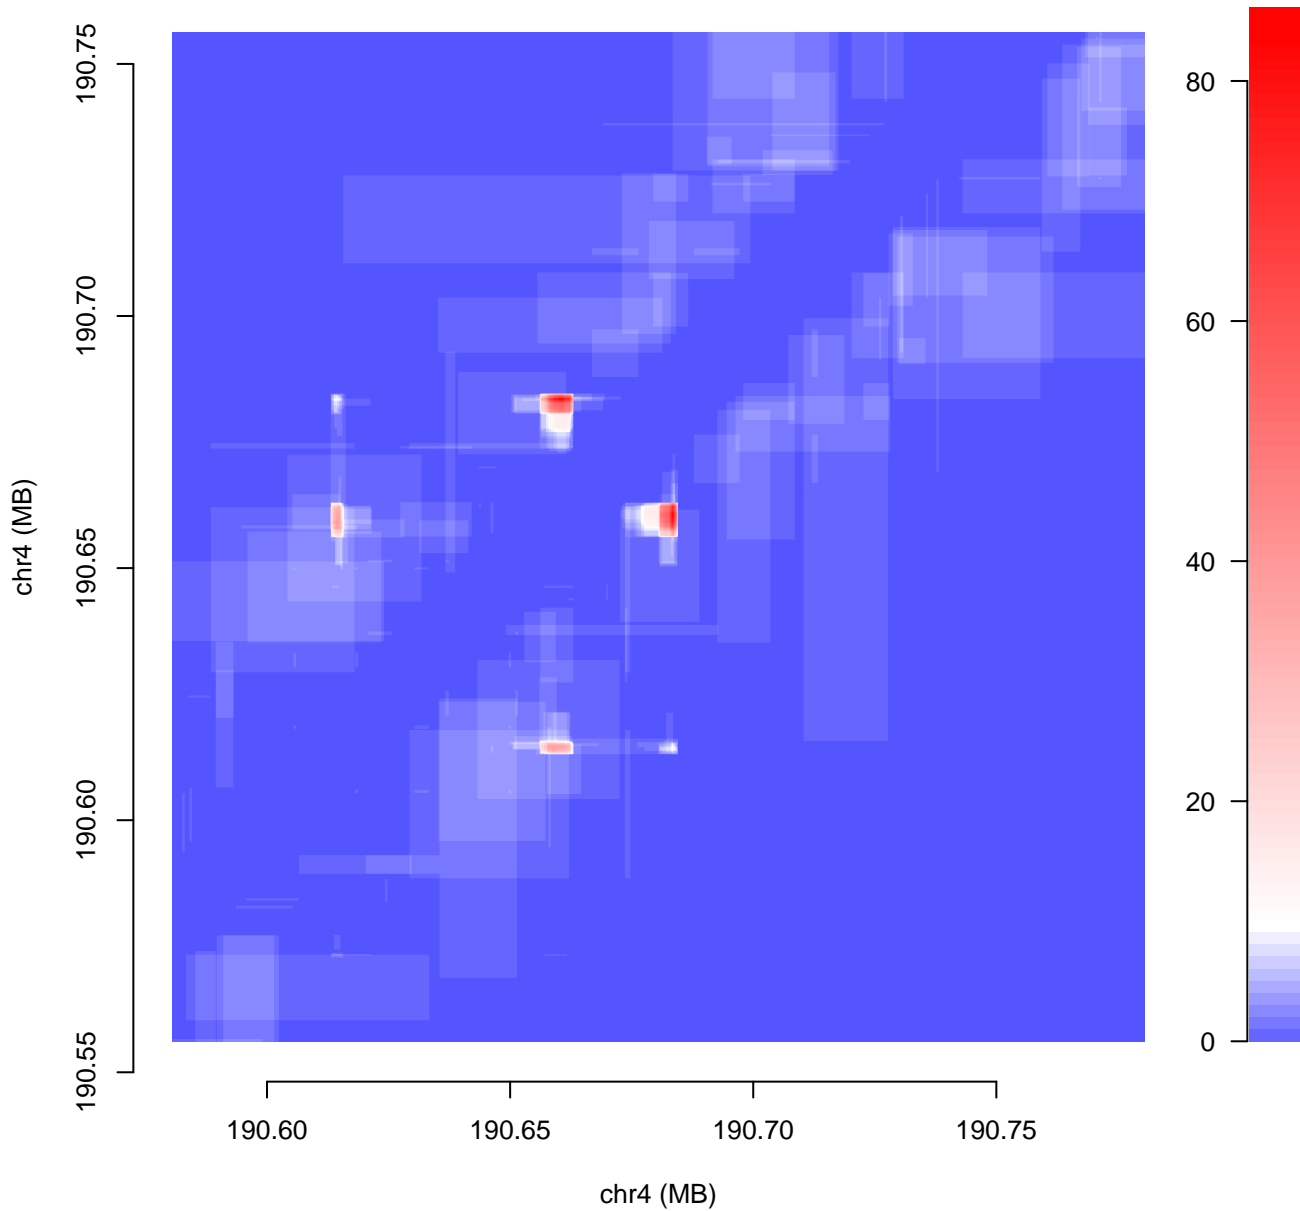

K562 chr4:190,684,482::chr4:190,662,932++

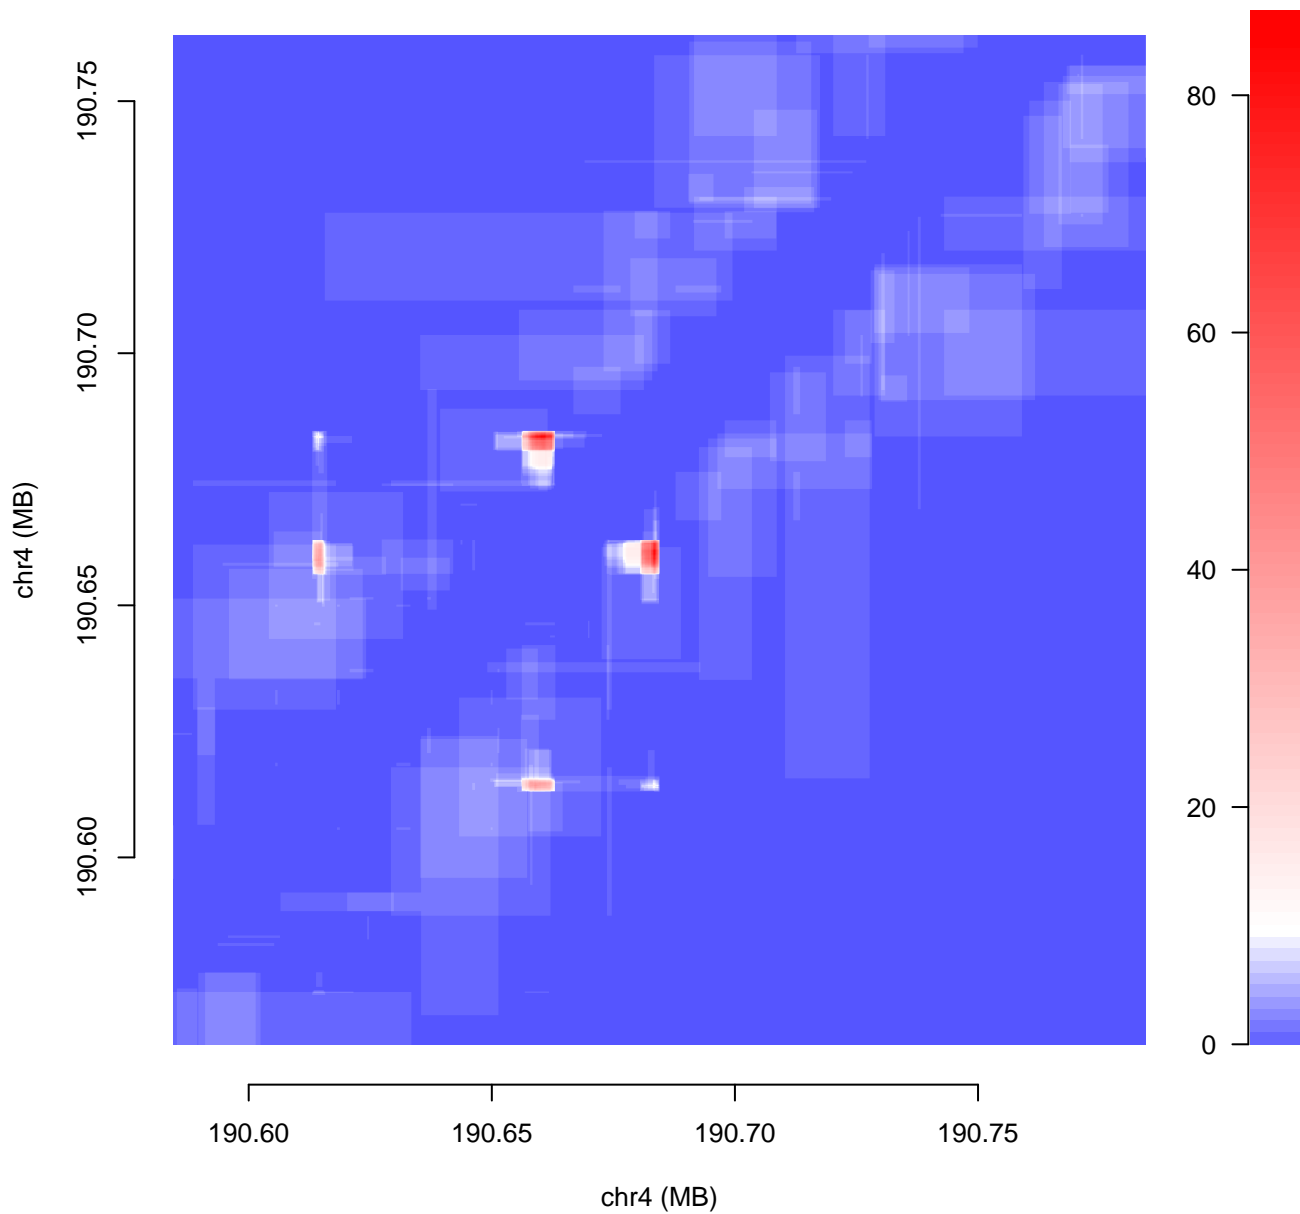

K562 chr4:190,662,932::chr4:190,656,144+-

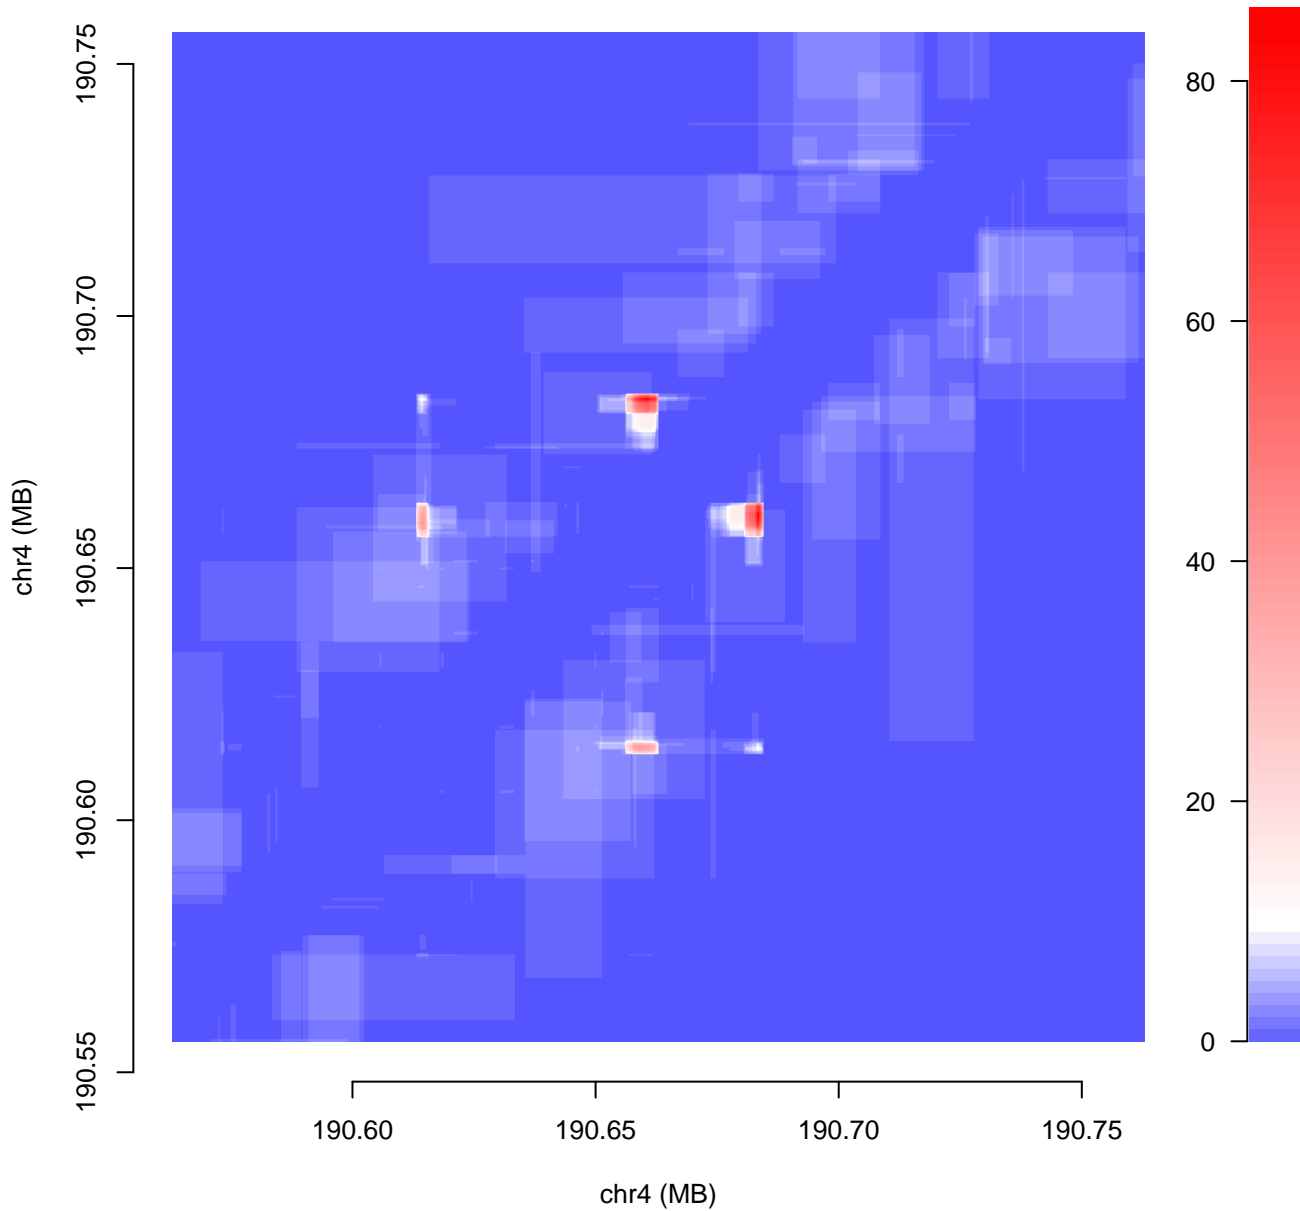

Supplement: Supplemental_Data.zip [file event_297.pdf › event_297.pdf]

Barcode

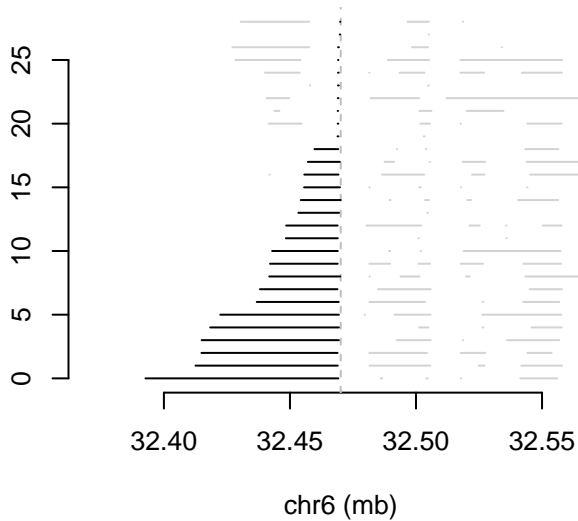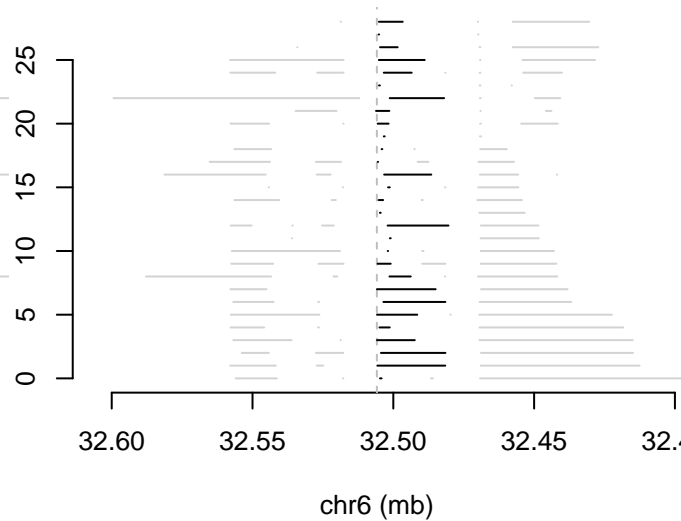

Copy number

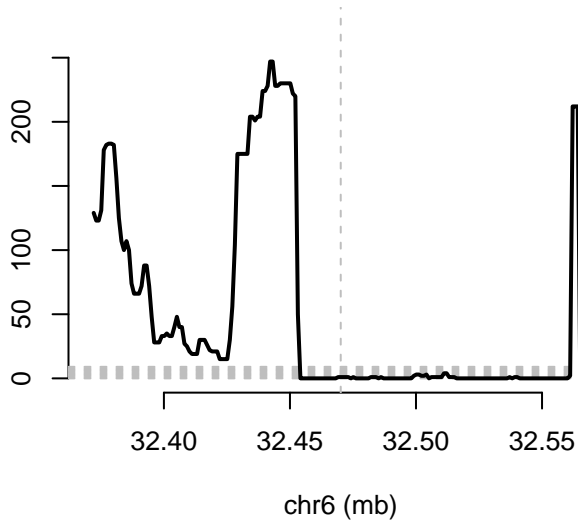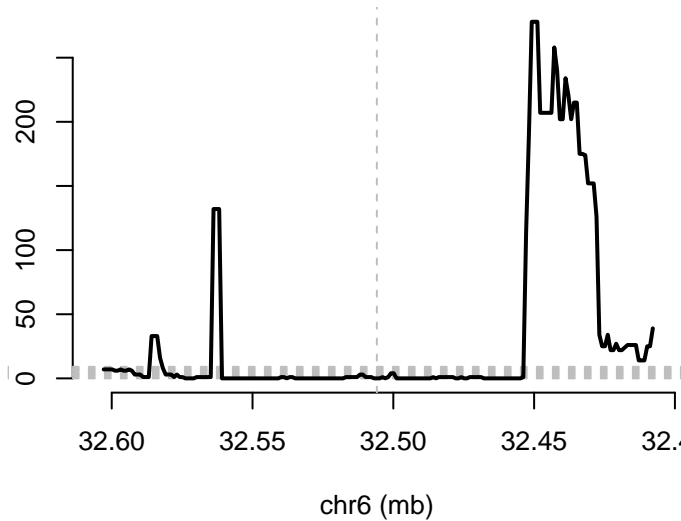

K562 chr6:32,470,150::chr6:32,505,844++

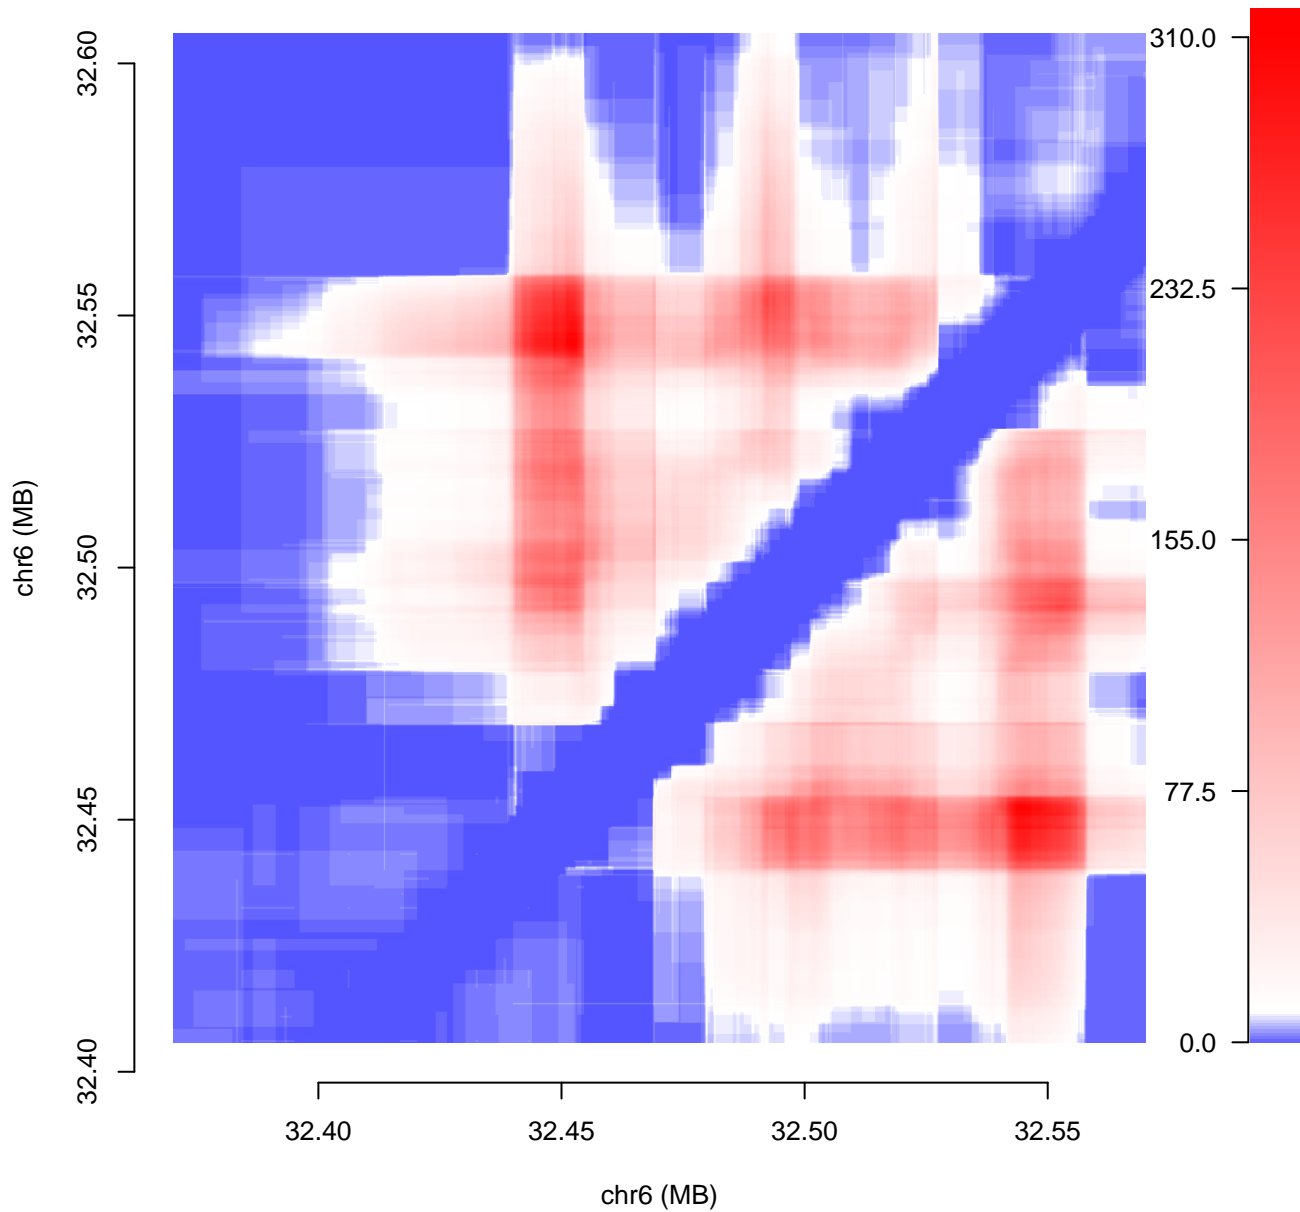

Supplement: Supplemental_Data.zip [file event_298.pdf › event_298.pdf]

Barcode

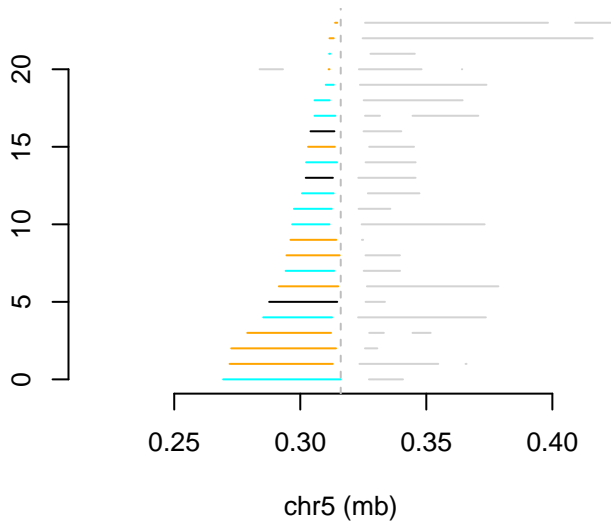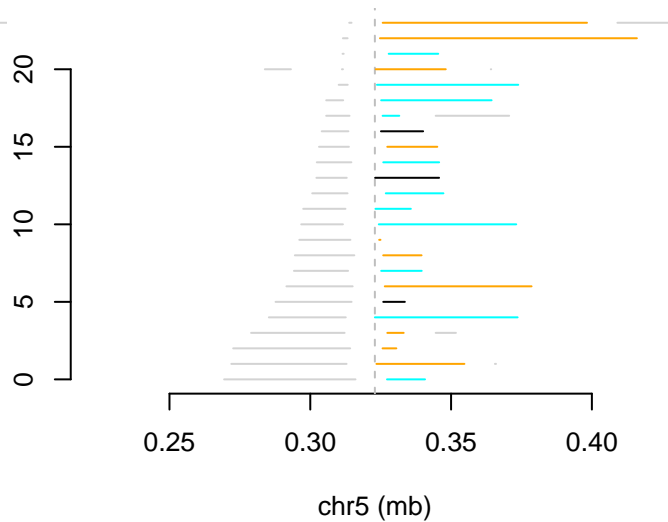

Copy number

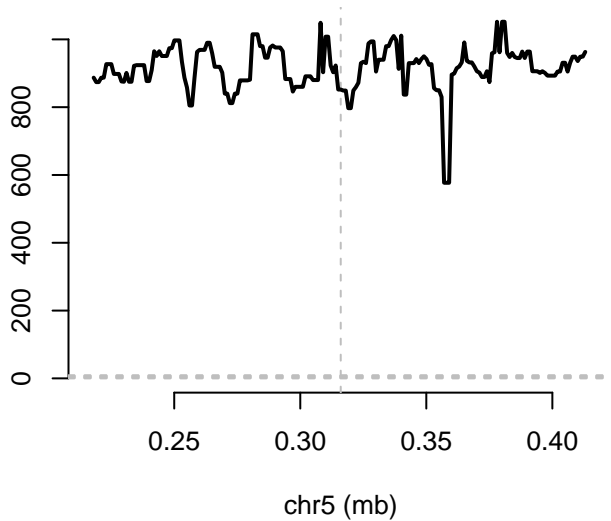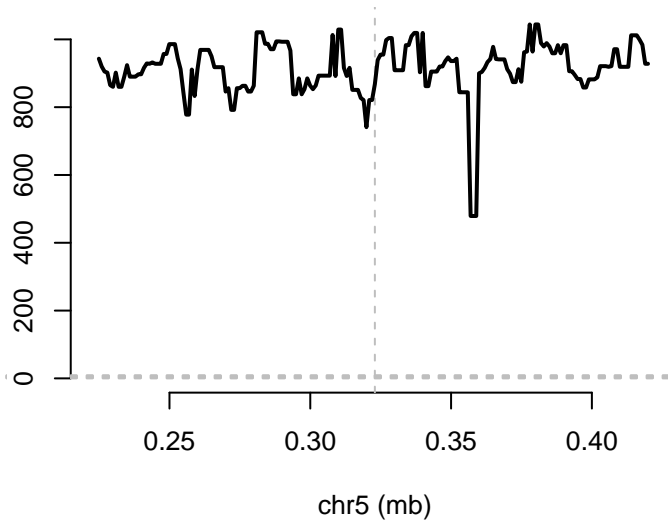

K562 chr5:316,054::chr5:322,935+-

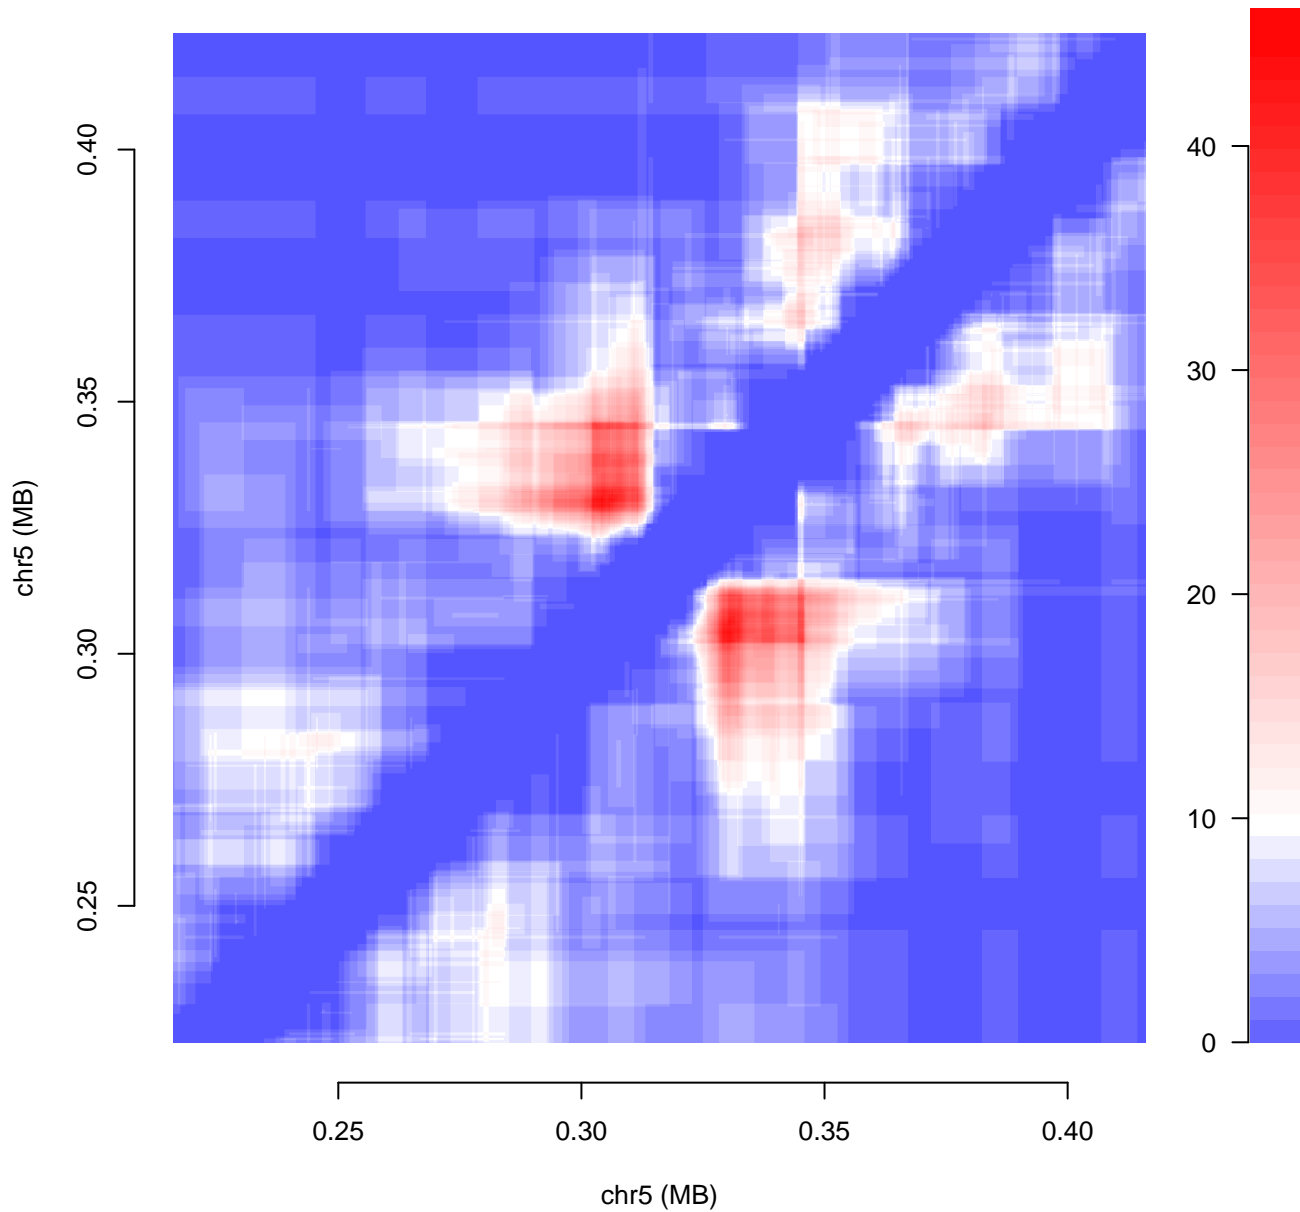

Supplement: Supplemental_Data.zip [file event_299.pdf › event_299.pdf]

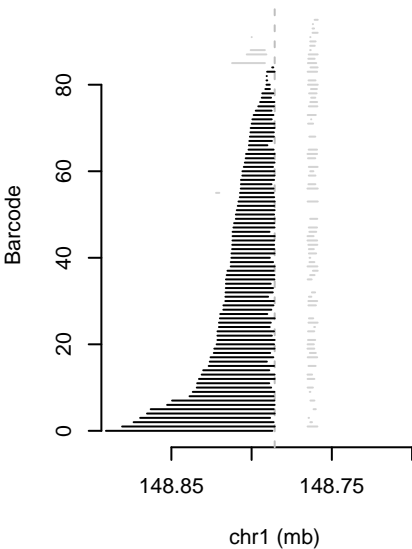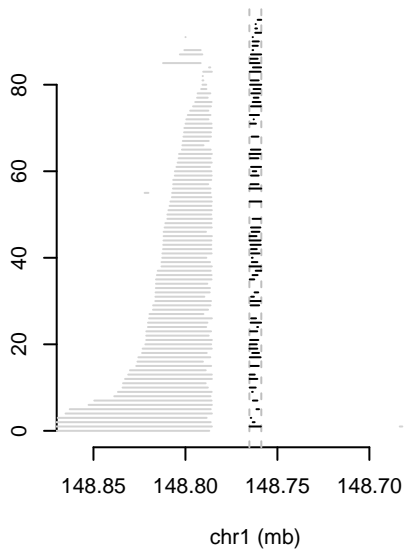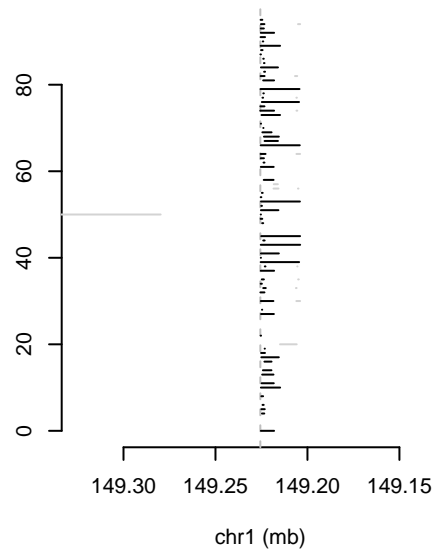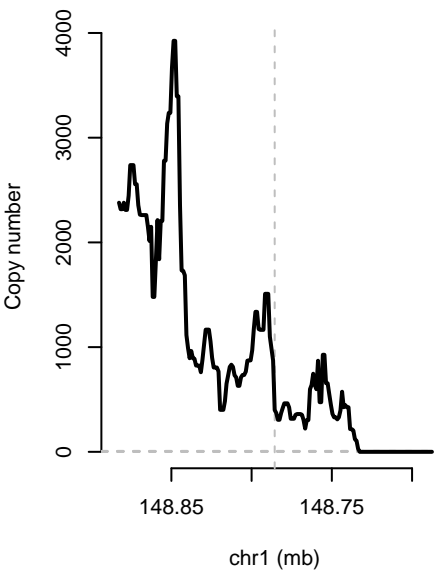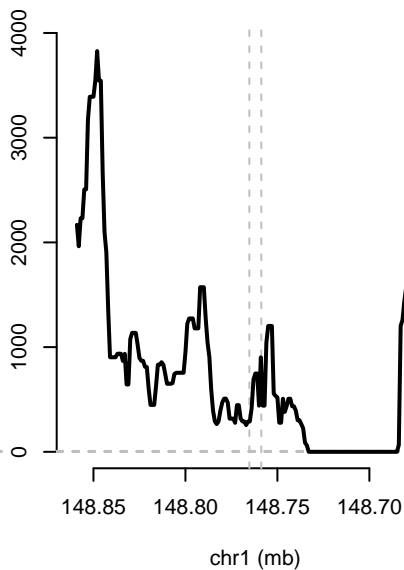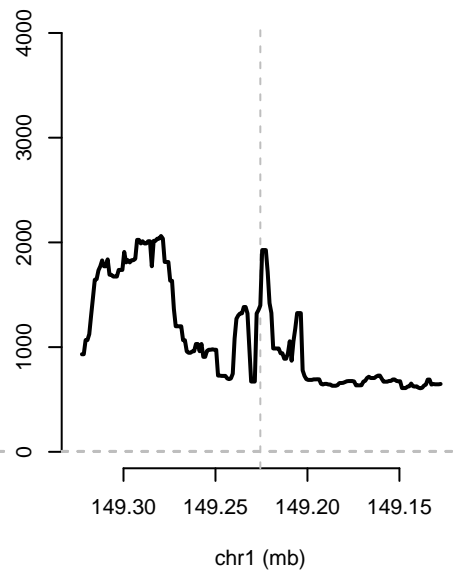

K562 chr1:148,785,620::chr1:148,765,229-+

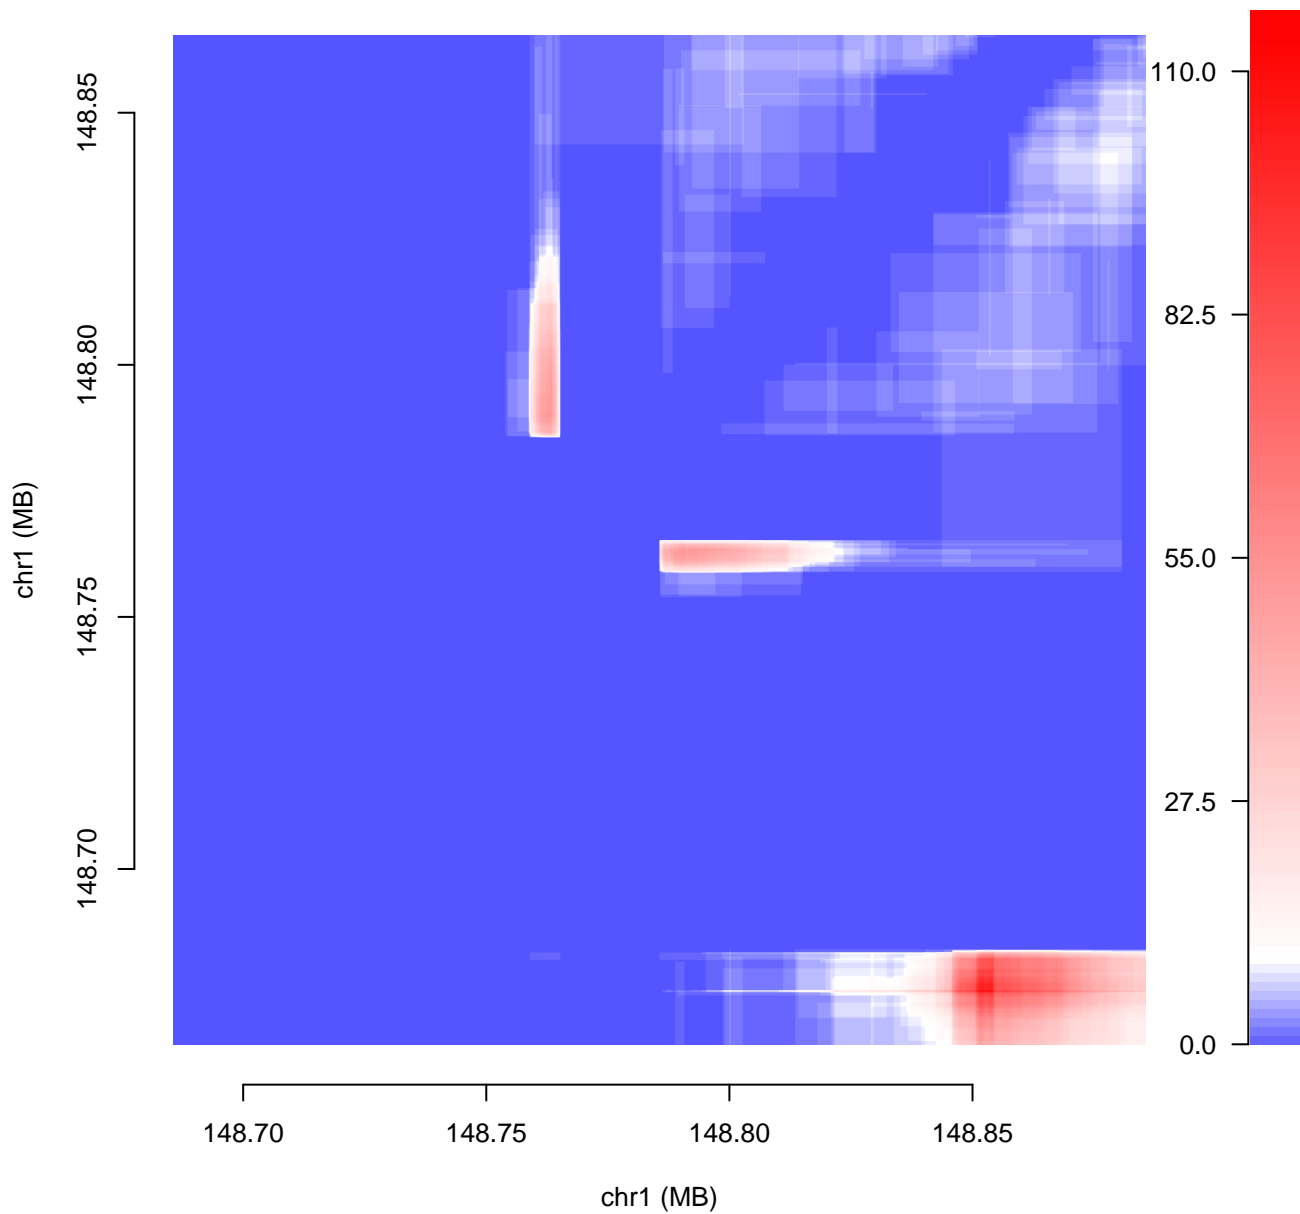

K562 chr1:148,758,759::chr1:148,765,229-+

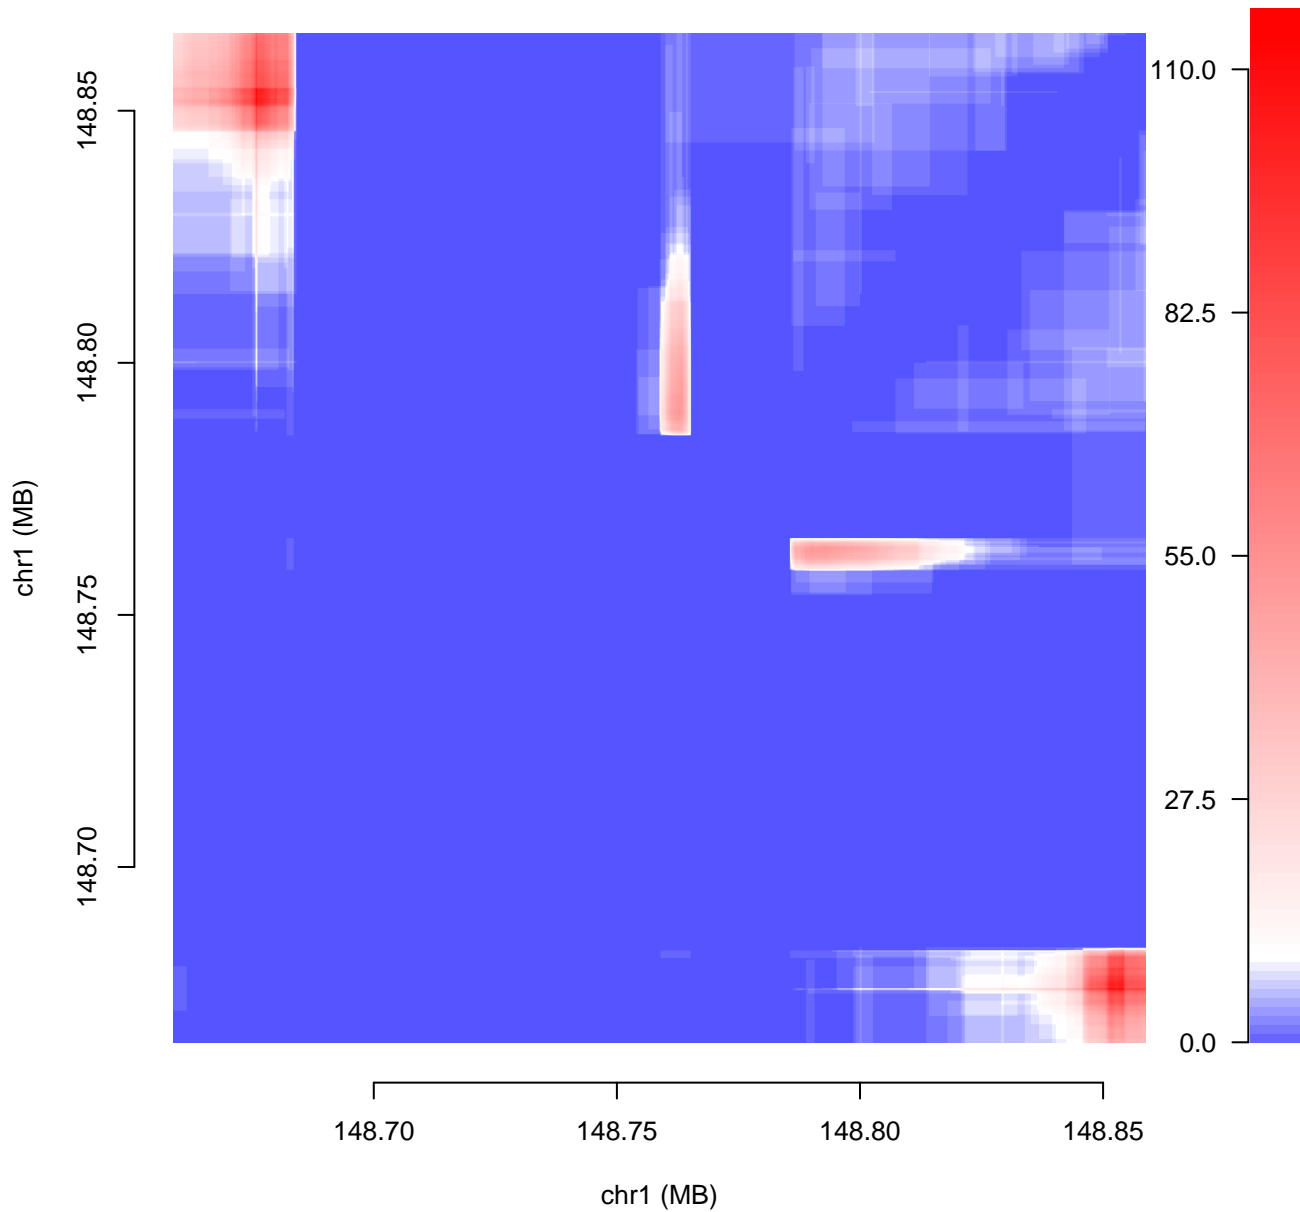

K562 chr1:148,758,759::chr1:149,225,613—+

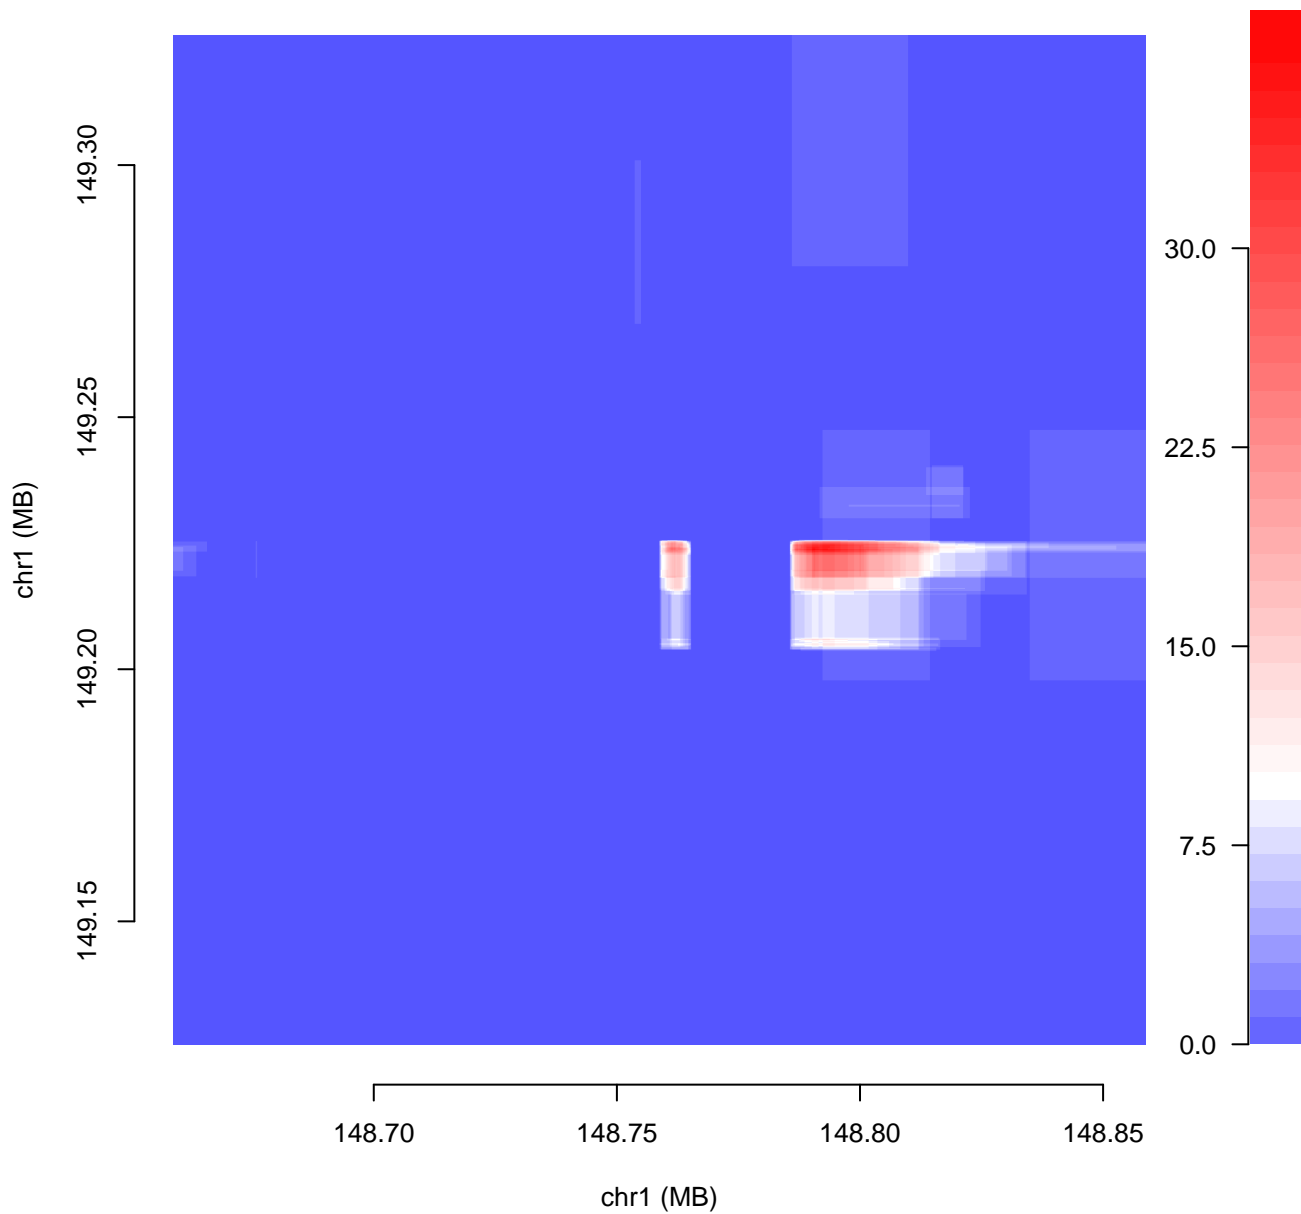

Supplement: Supplemental_Data.zip [file event_3.pdf › event_3.pdf]

Barcode

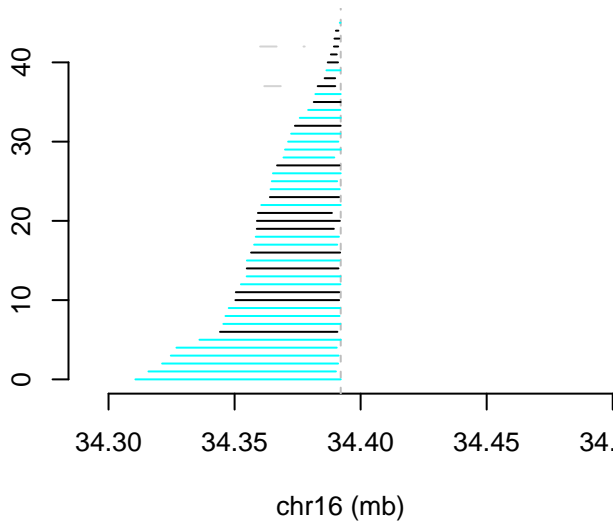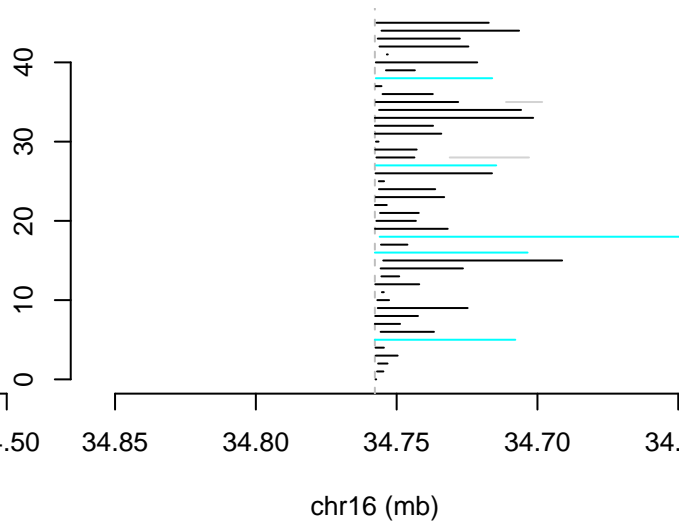

Copy number

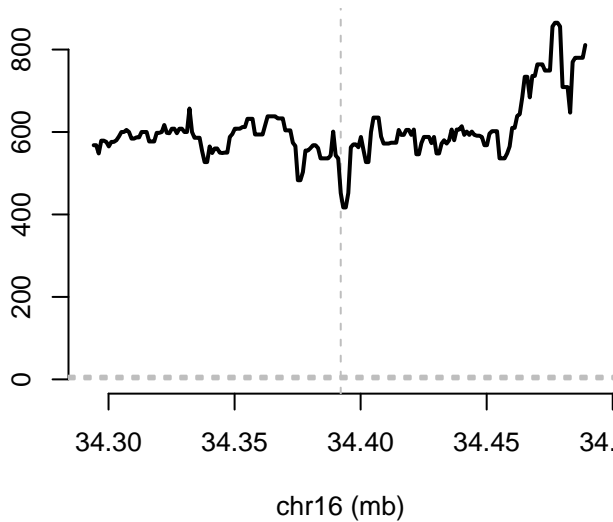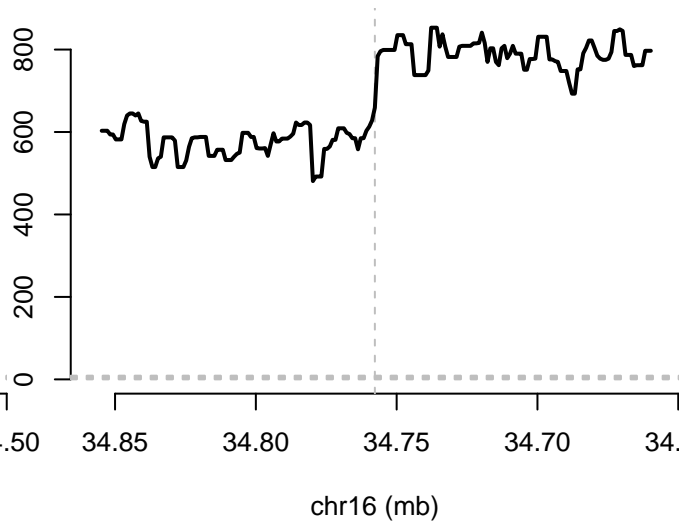

K562 chr16:34,757,737::chr16:34,392,111++

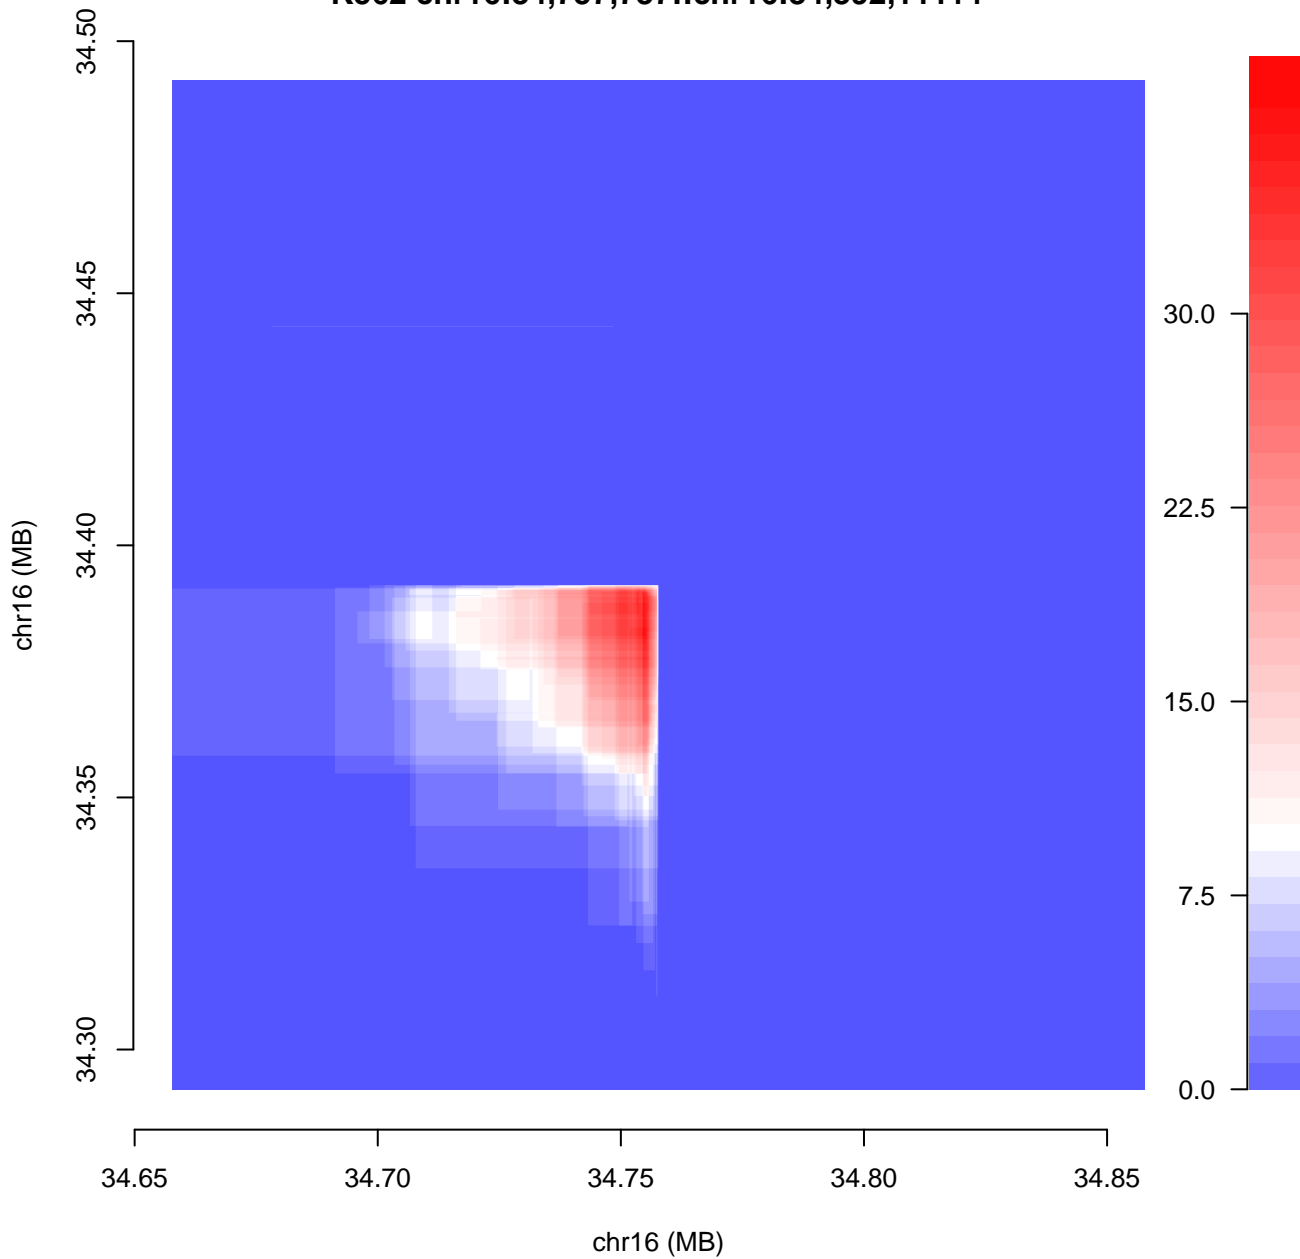

Supplement: Supplemental_Data.zip [file event_30.pdf › event_30.pdf]

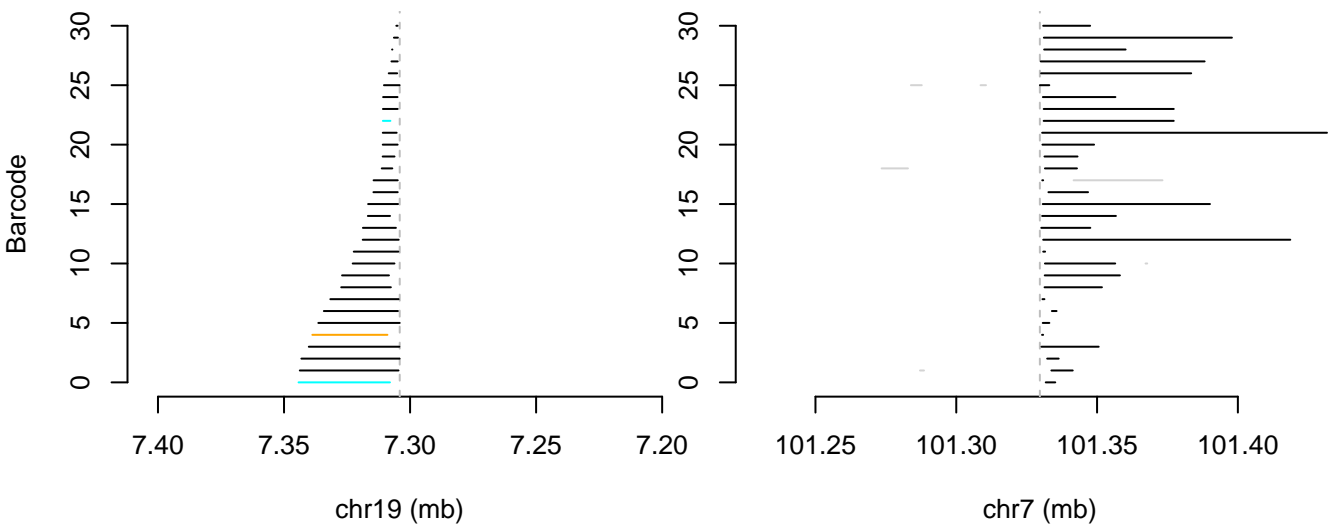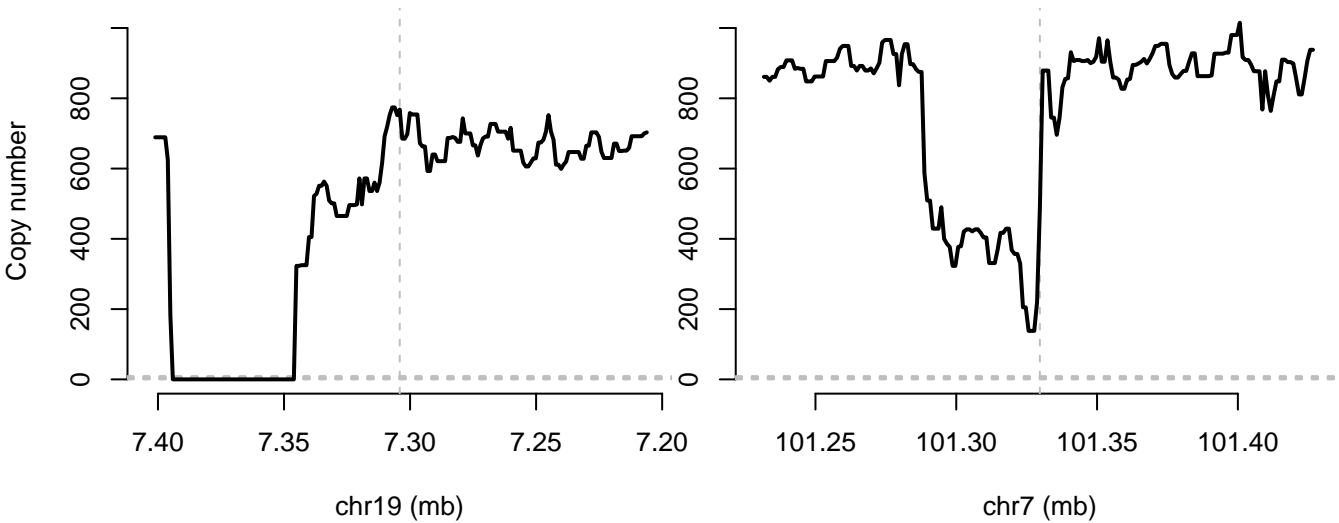

K562 chr7:101,329,694::chr19:7,304,095--

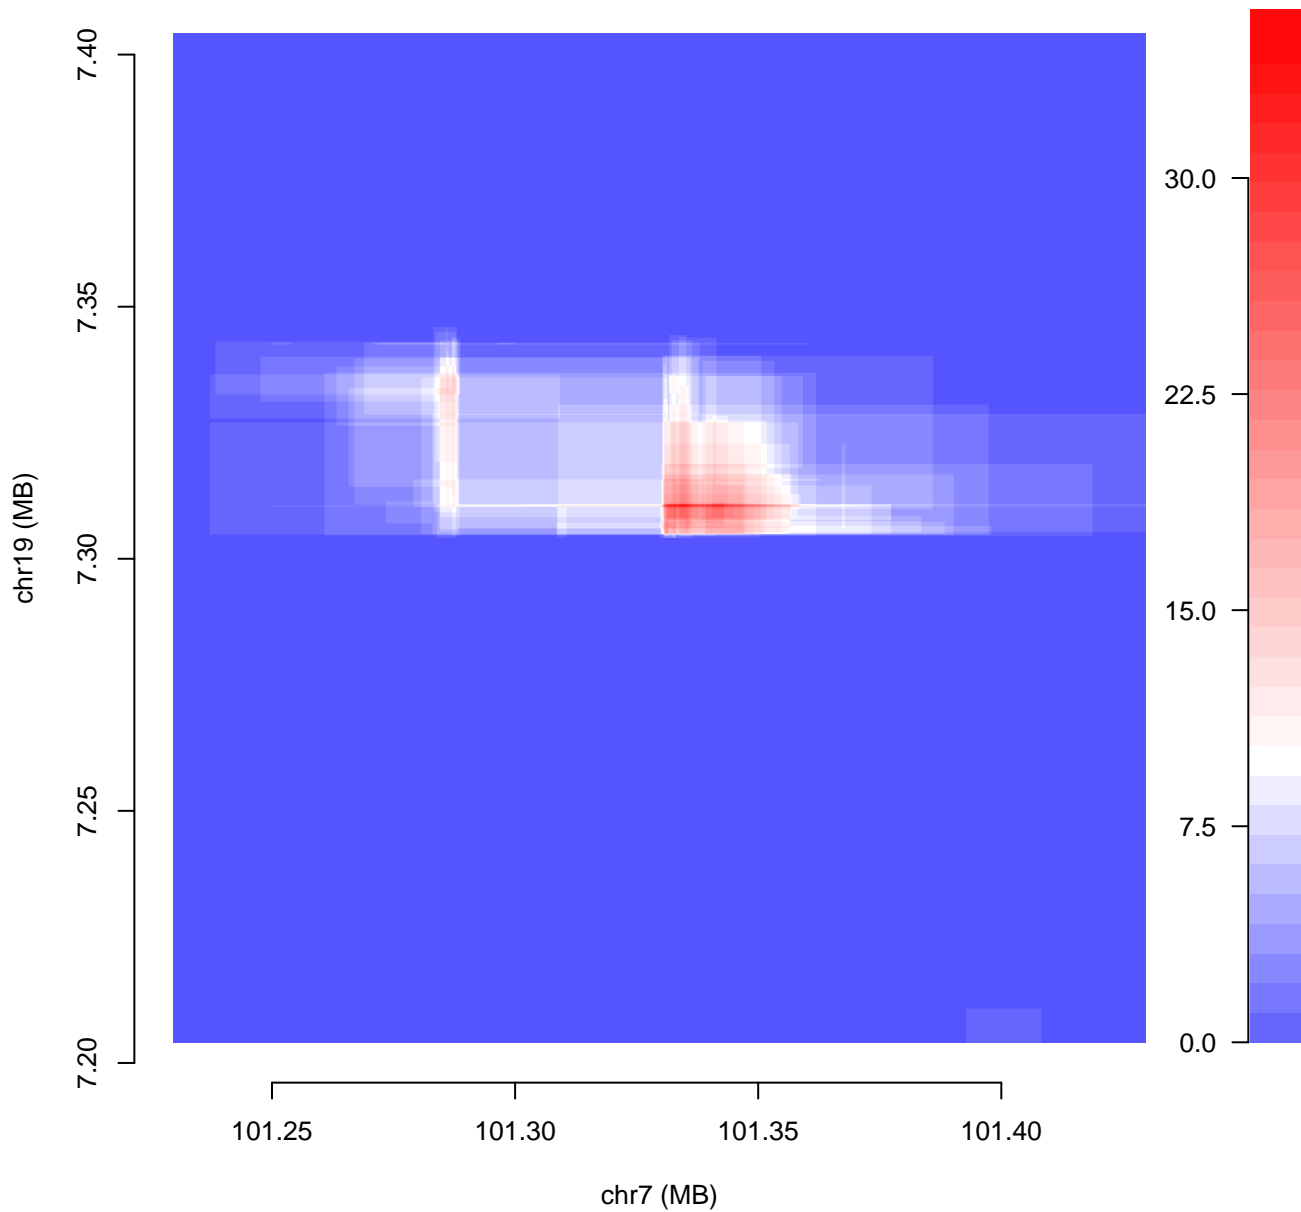

Supplement: Supplemental_Data.zip [file event_300.pdf › event_300.pdf]

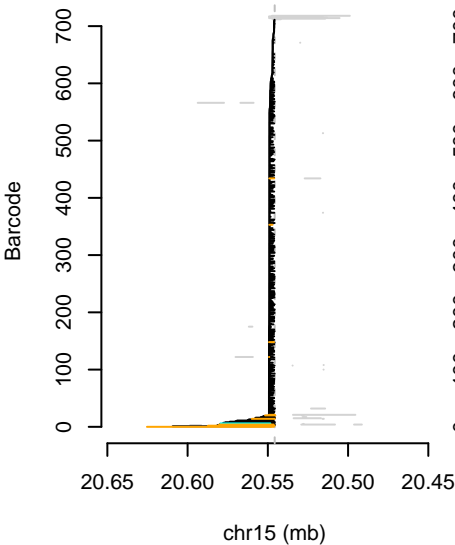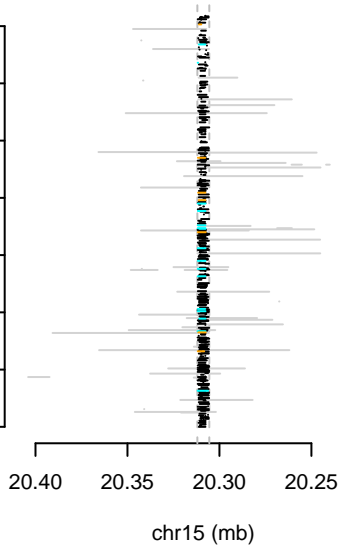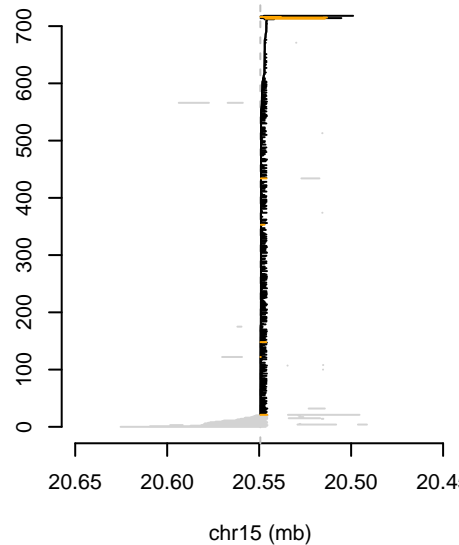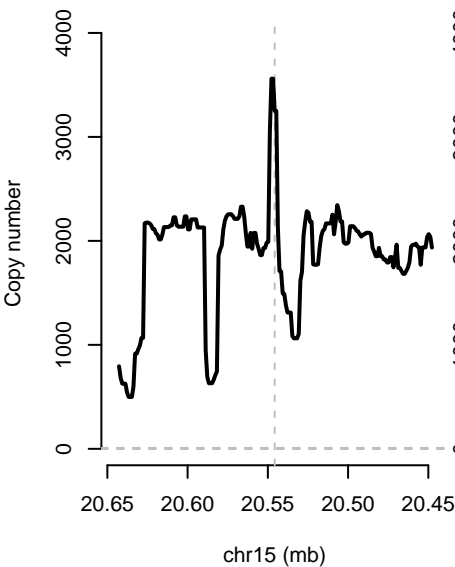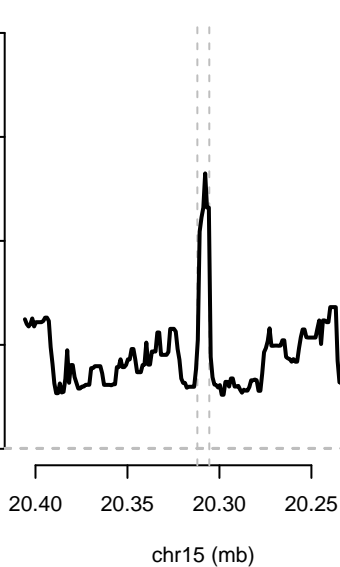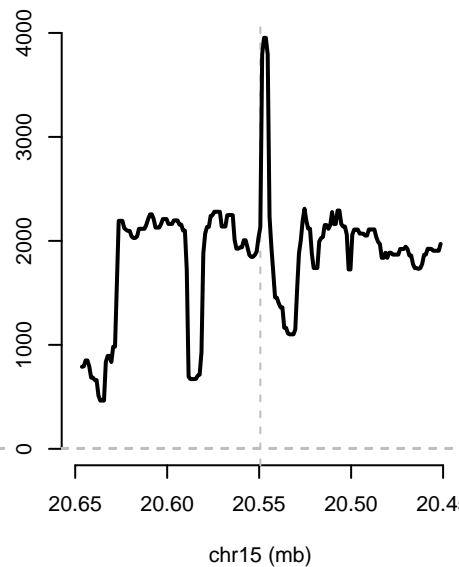

K562 chr15:20,312,003::chr15:20,545,734+-

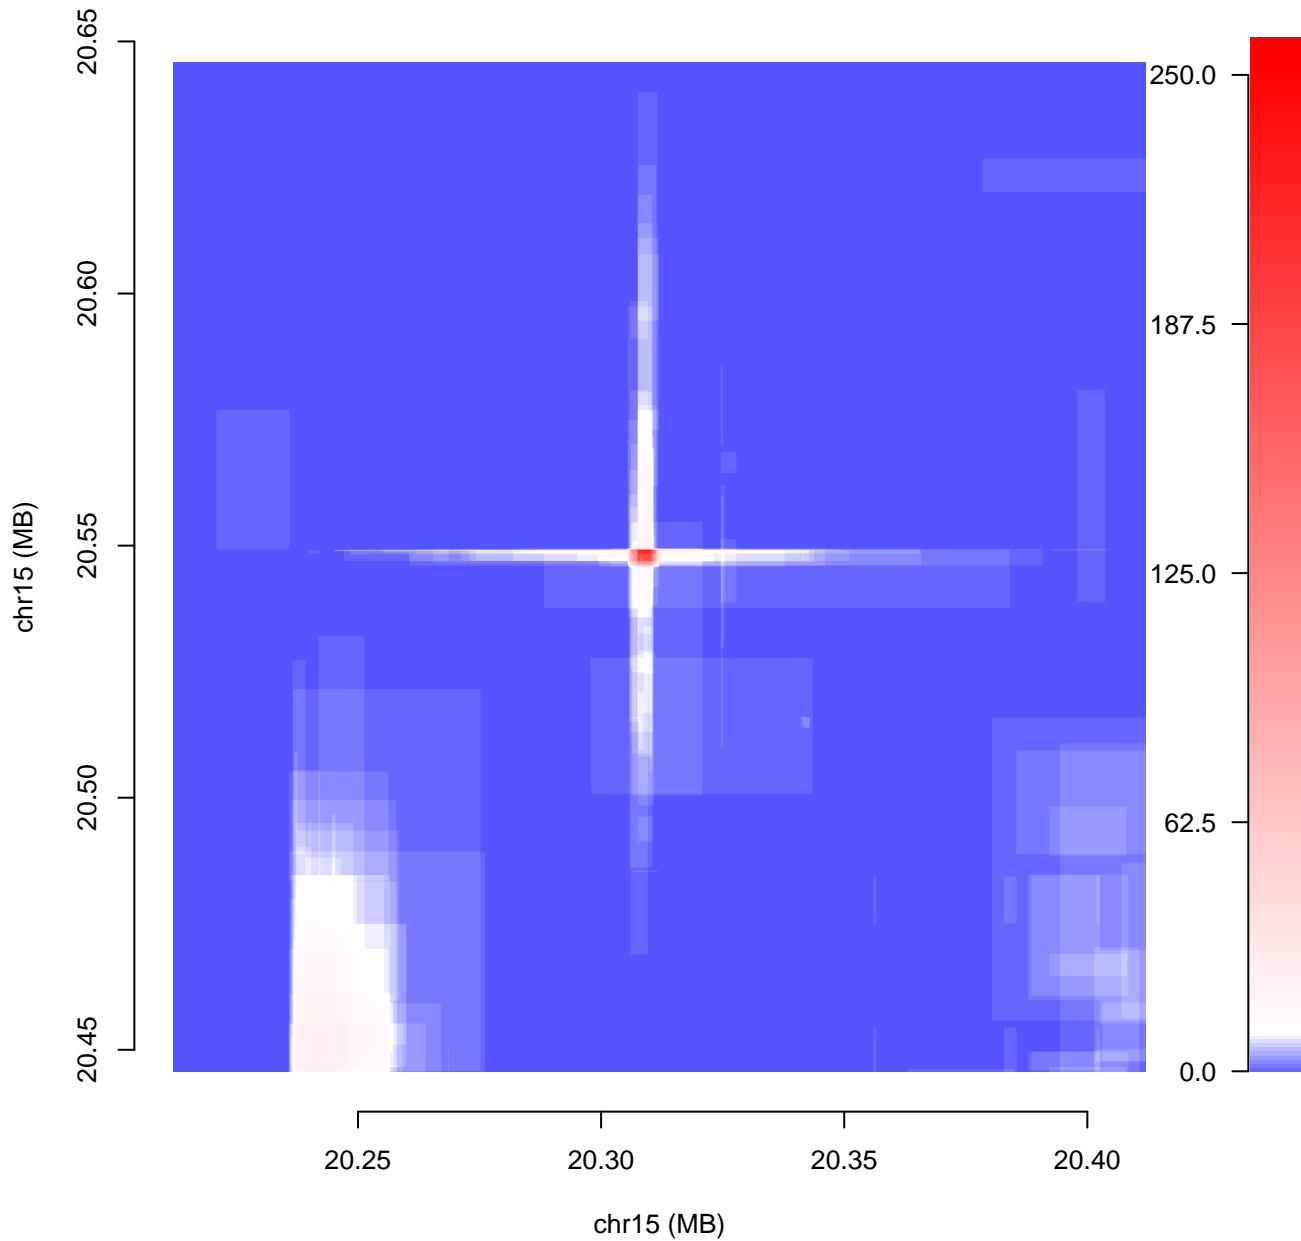

K562 chr15:20,312,003::chr15:20,305,506+-

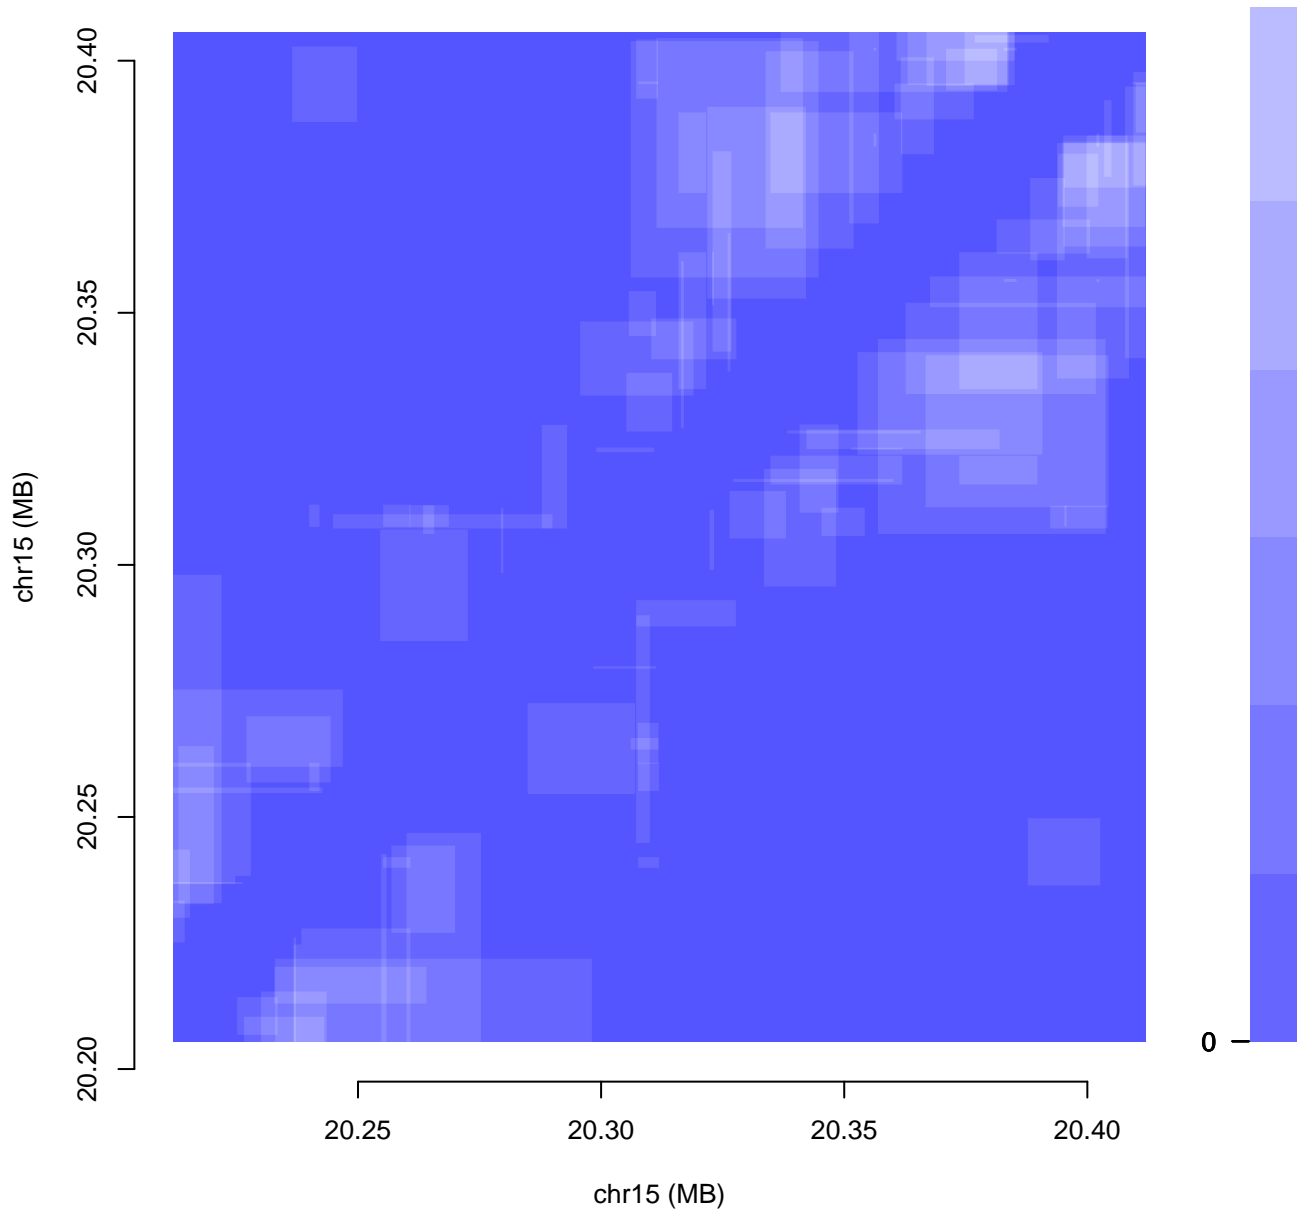

K562 chr15:20,549,358::chr15:20,305,506+-

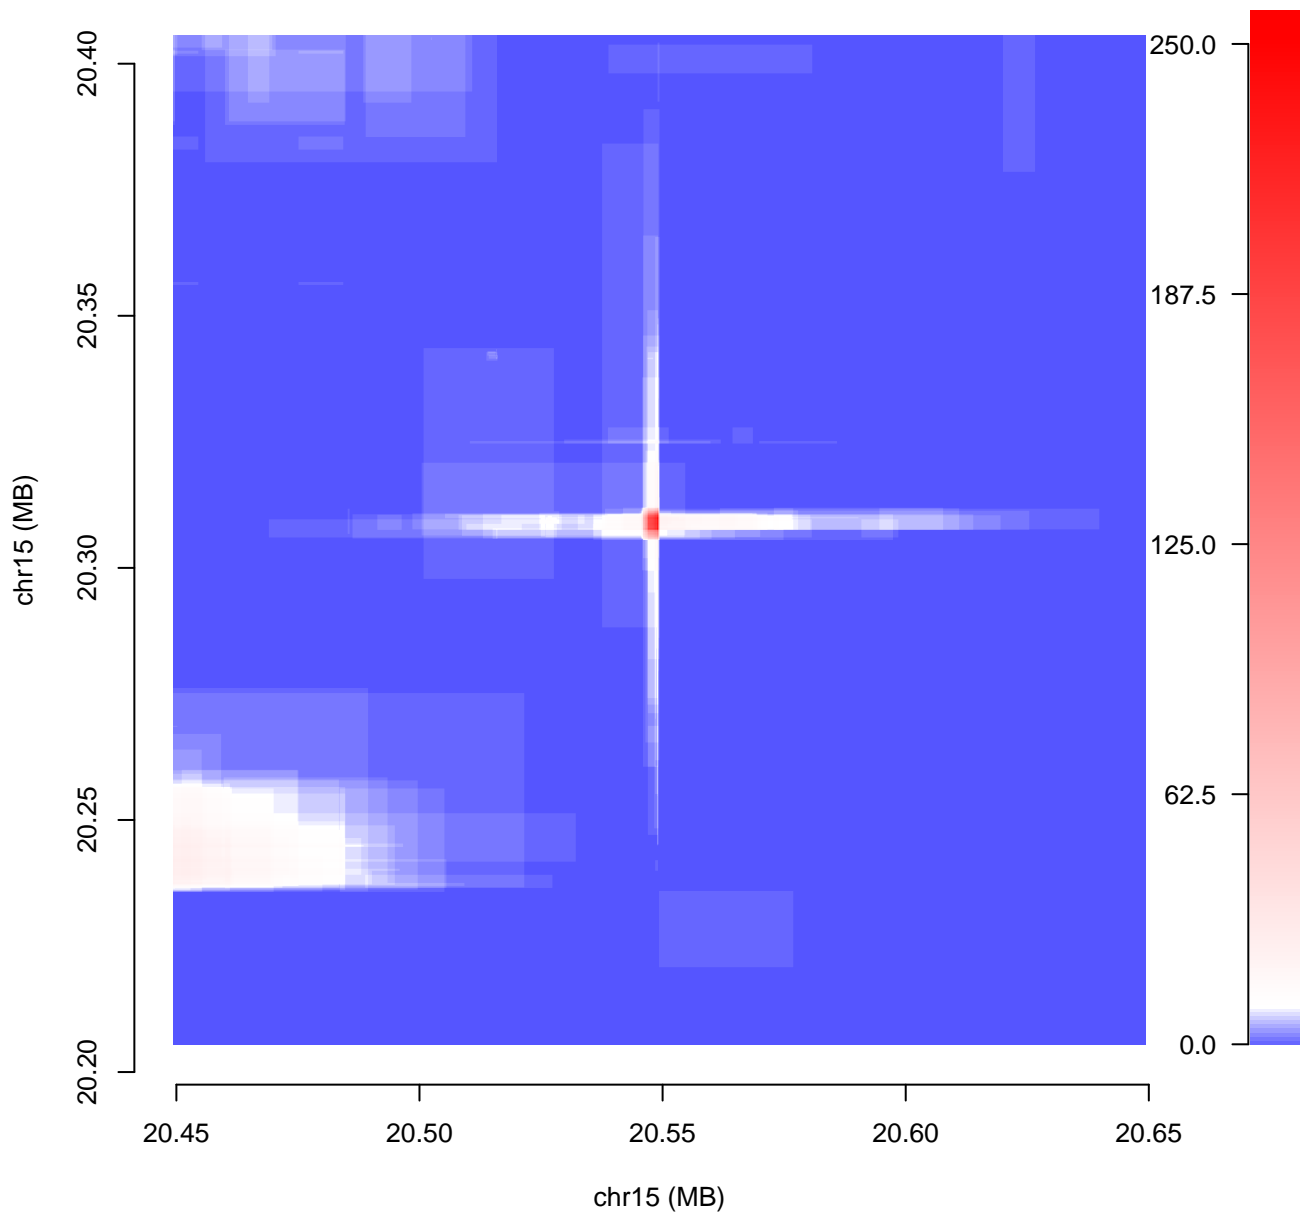

Supplement: Supplemental_Data.zip [file event_301.pdf › event_301.pdf]

Barcode

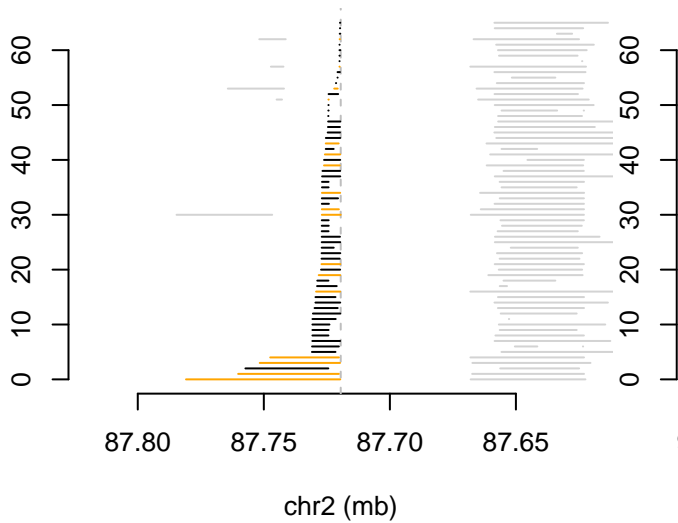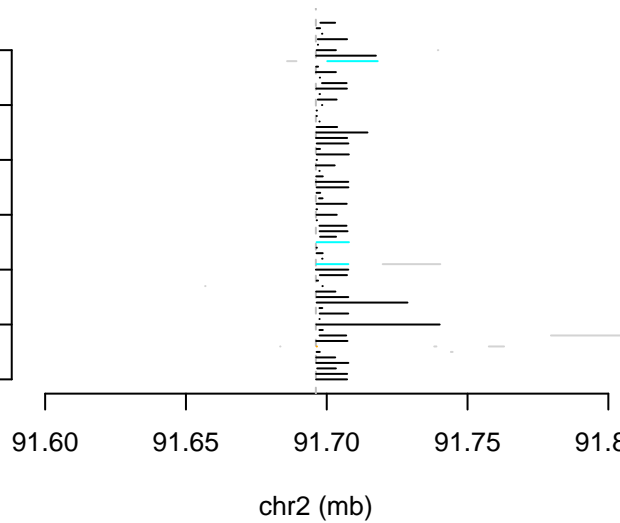

Copy number

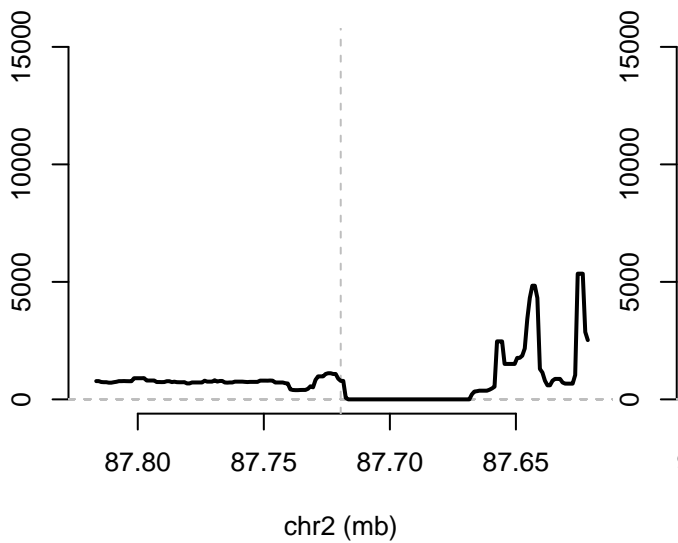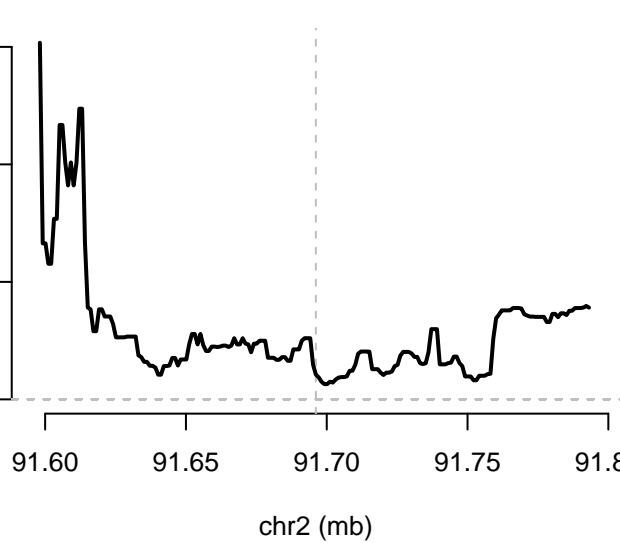

K562 chr2:87,719,488::chr2:91,696,139--

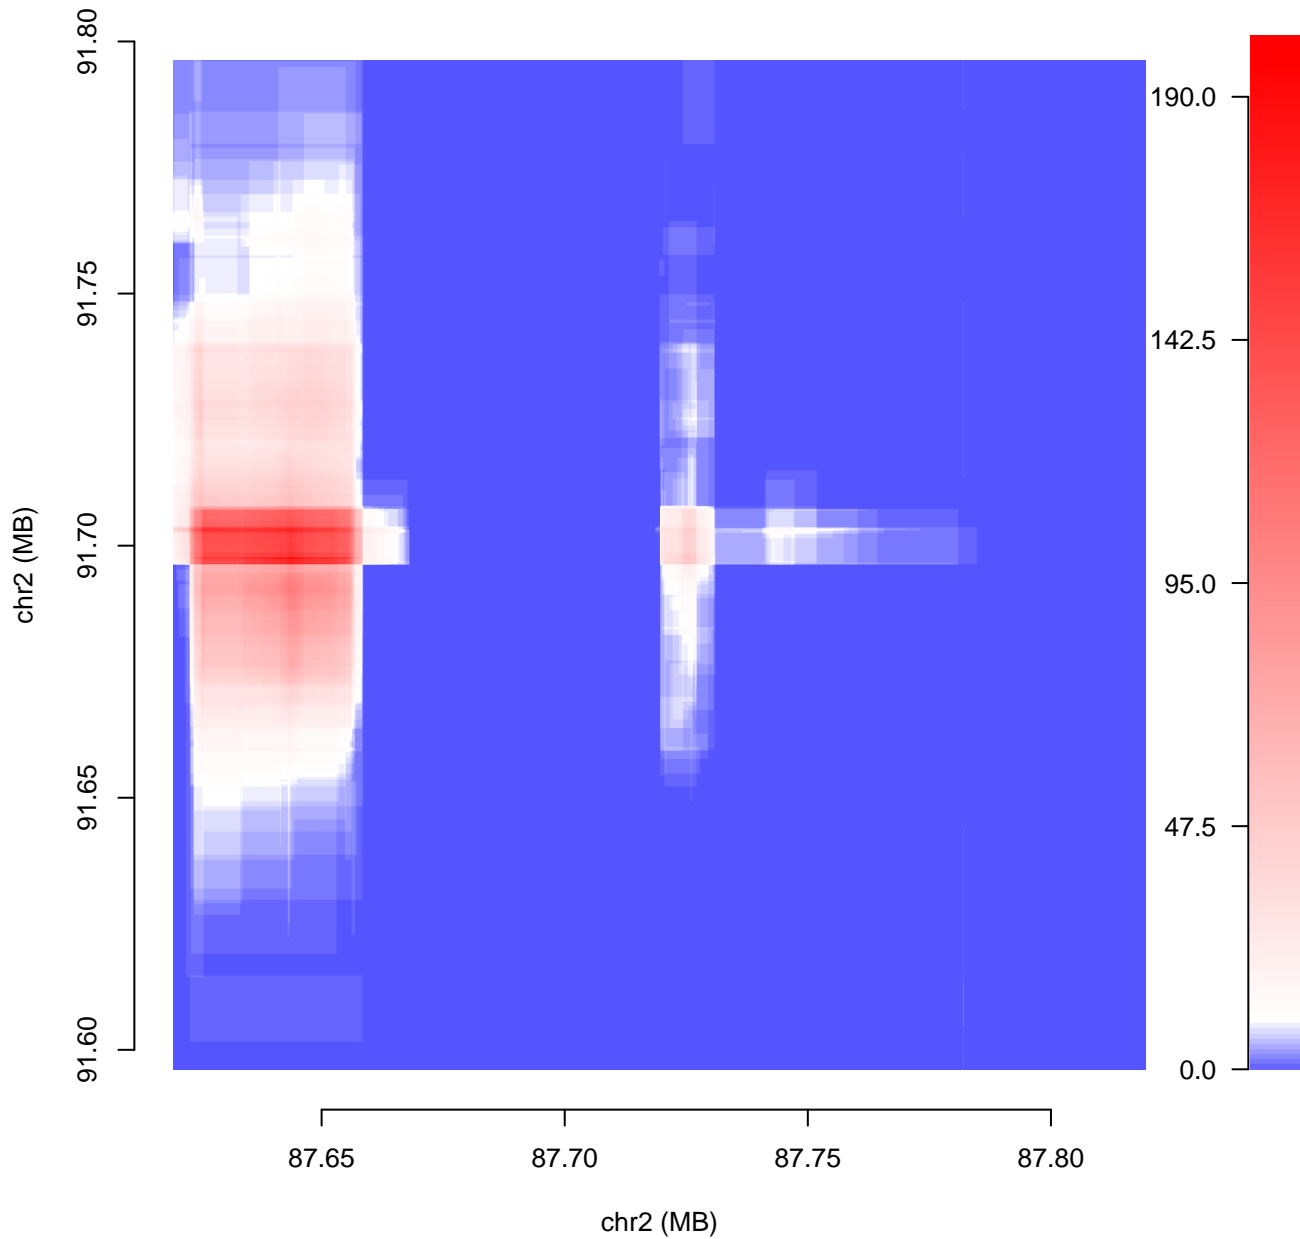

Supplement: Supplemental_Data.zip [file event_302.pdf › event_302.pdf]

Barcode

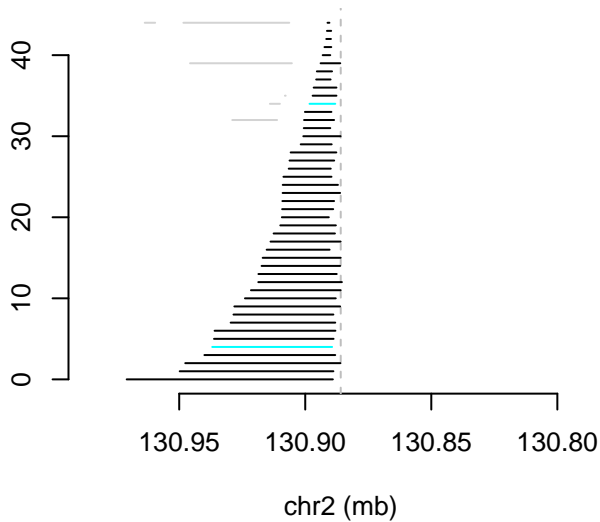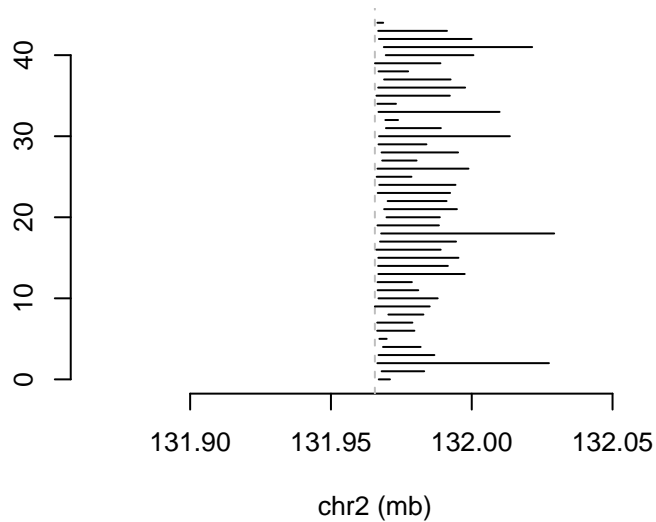

Copy number

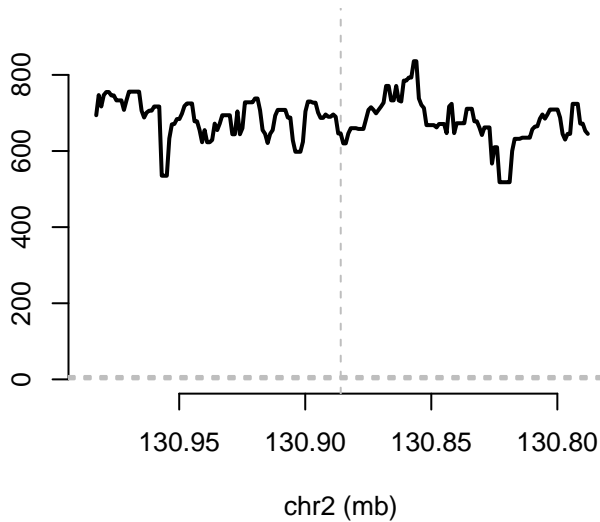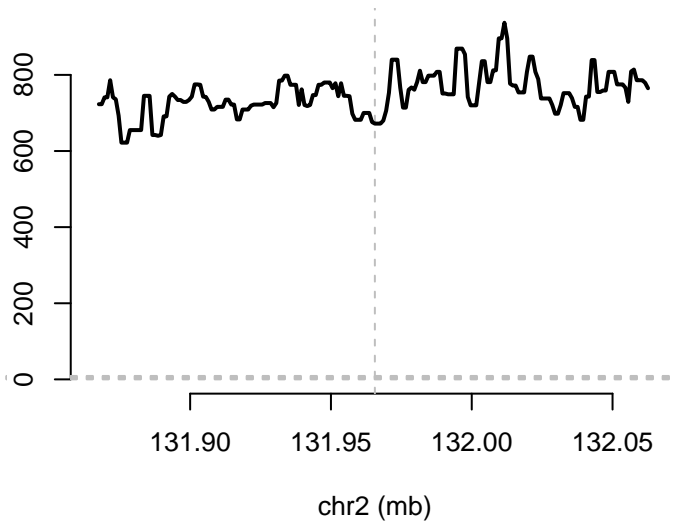

K562 chr2:131,965,603::chr2:130,885,918--

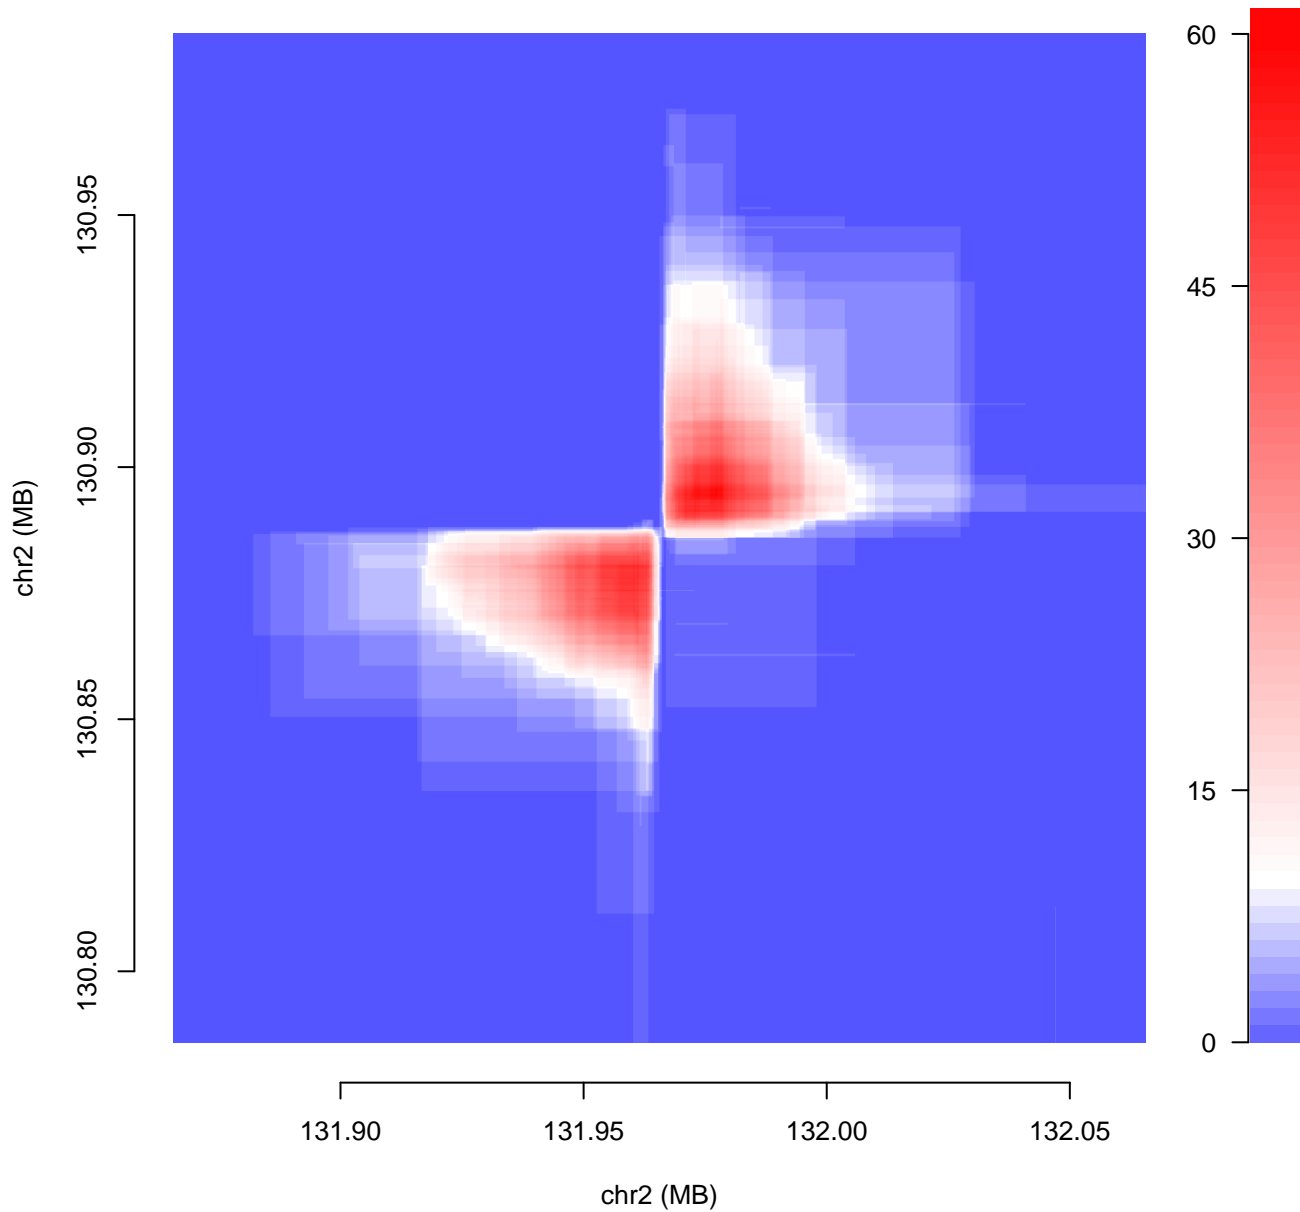

Supplement: Supplemental_Data.zip [file event_303.pdf › event_303.pdf]

Barcode

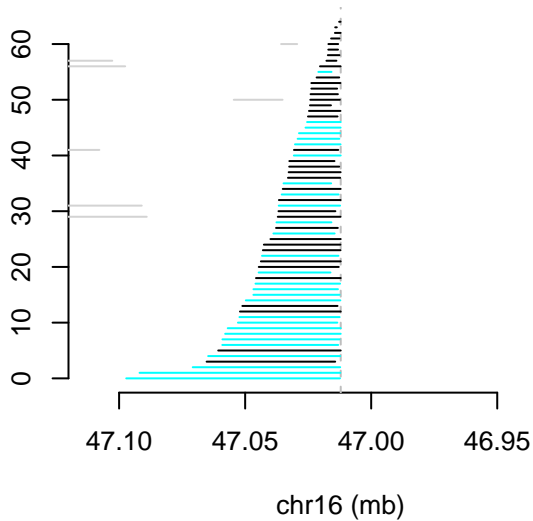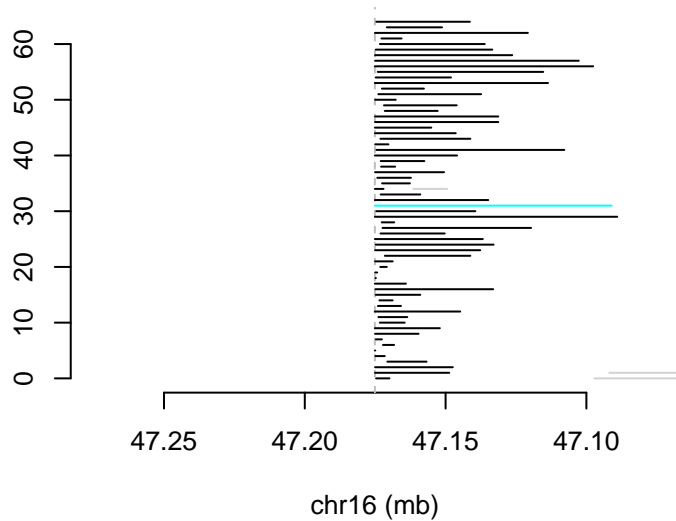

Copy number

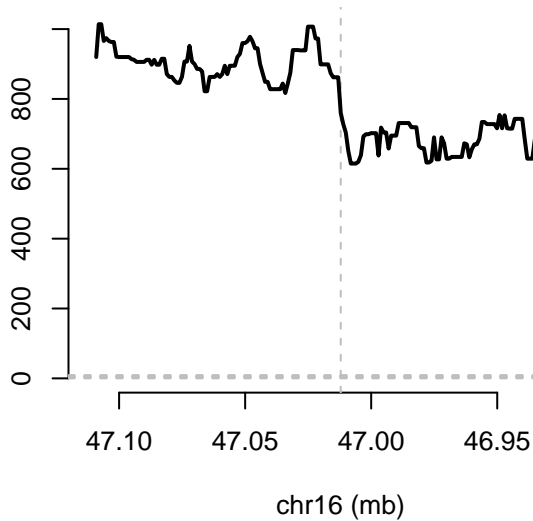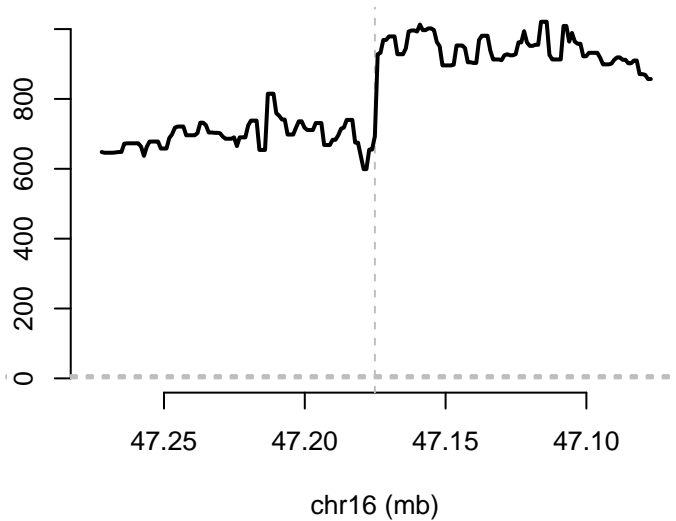

K562 chr16:47,175,108::chr16:47,012,078+-

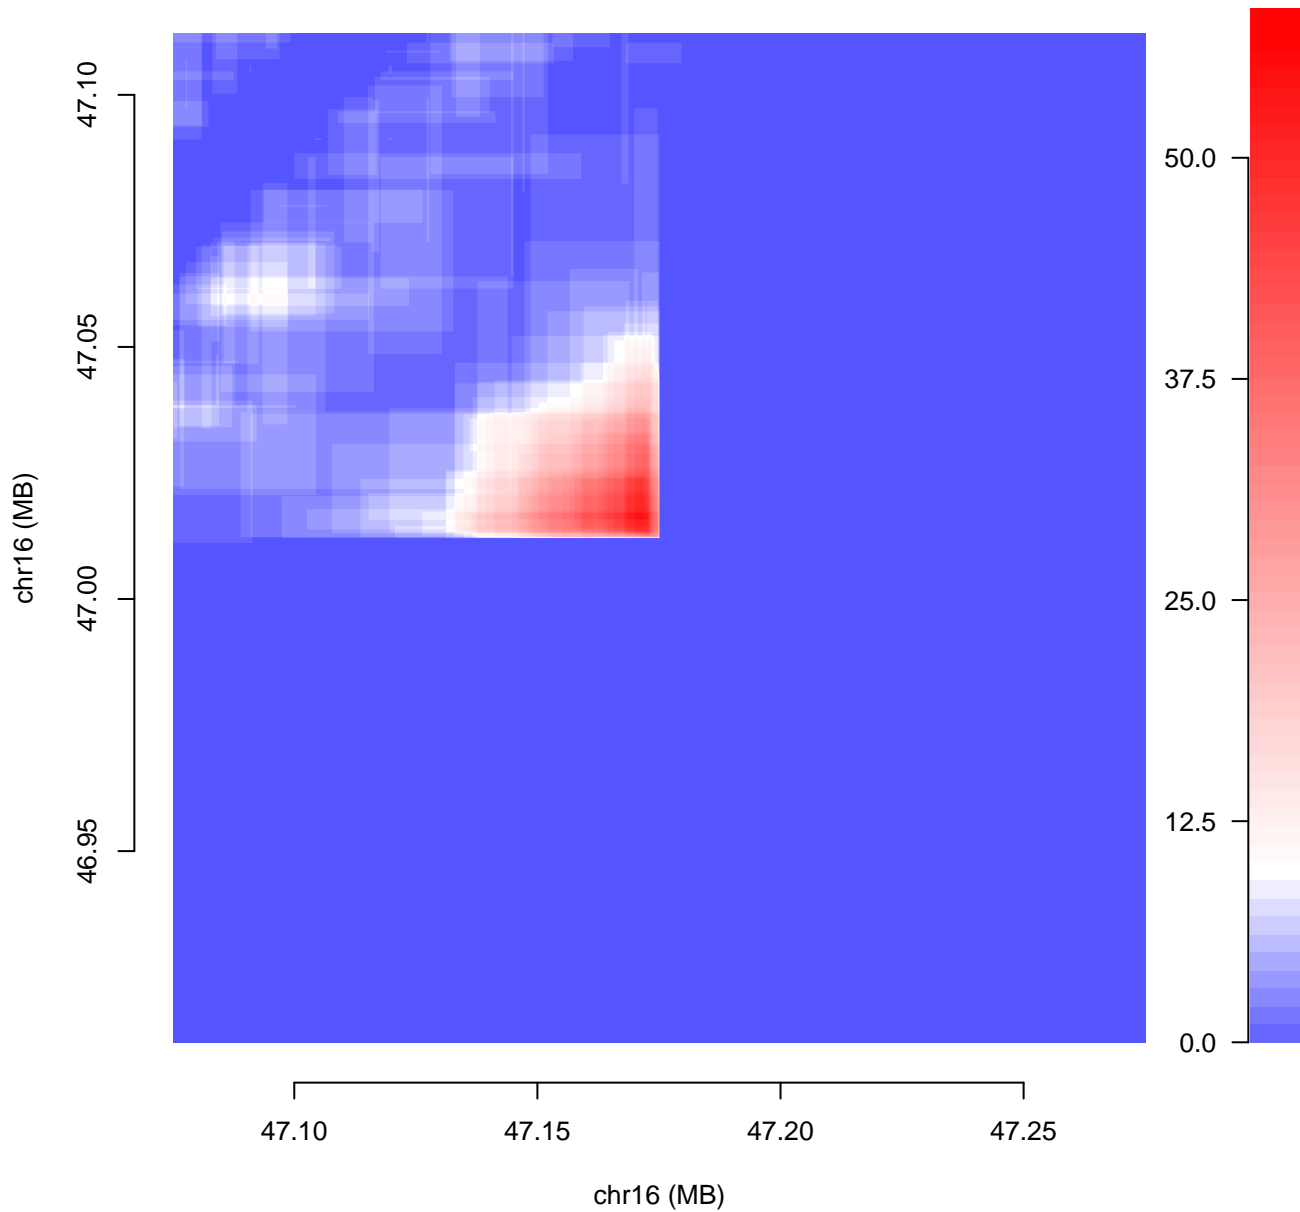

Supplement: Supplemental_Data.zip [file event_304.pdf › event_304.pdf]

Barcode

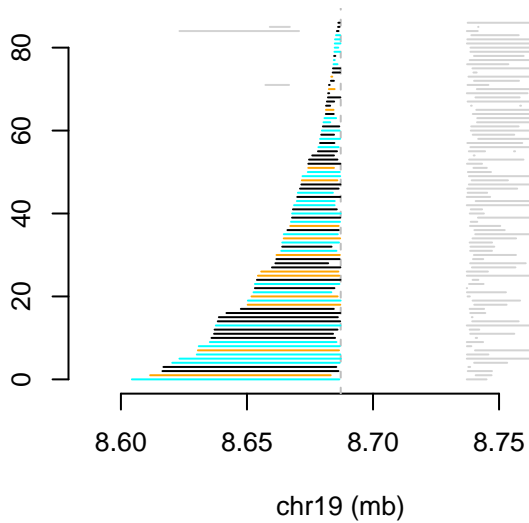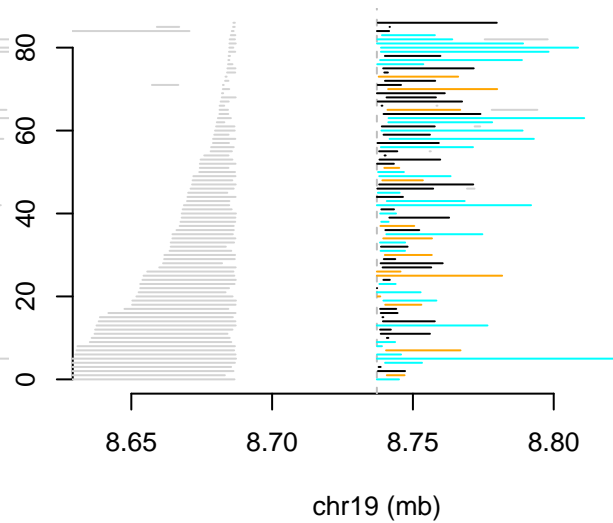

Copy number

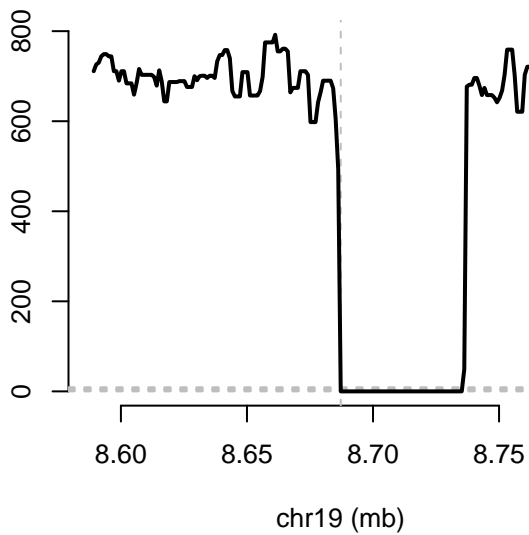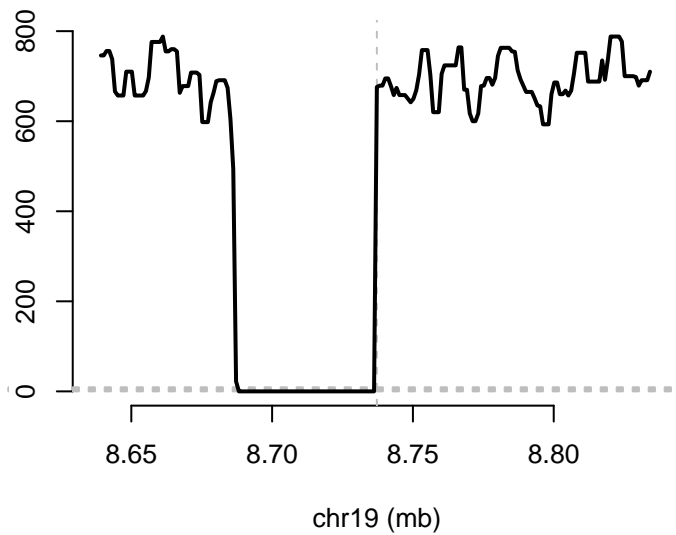

K562 chr19:8,687,199::chr19:8,737,197+-

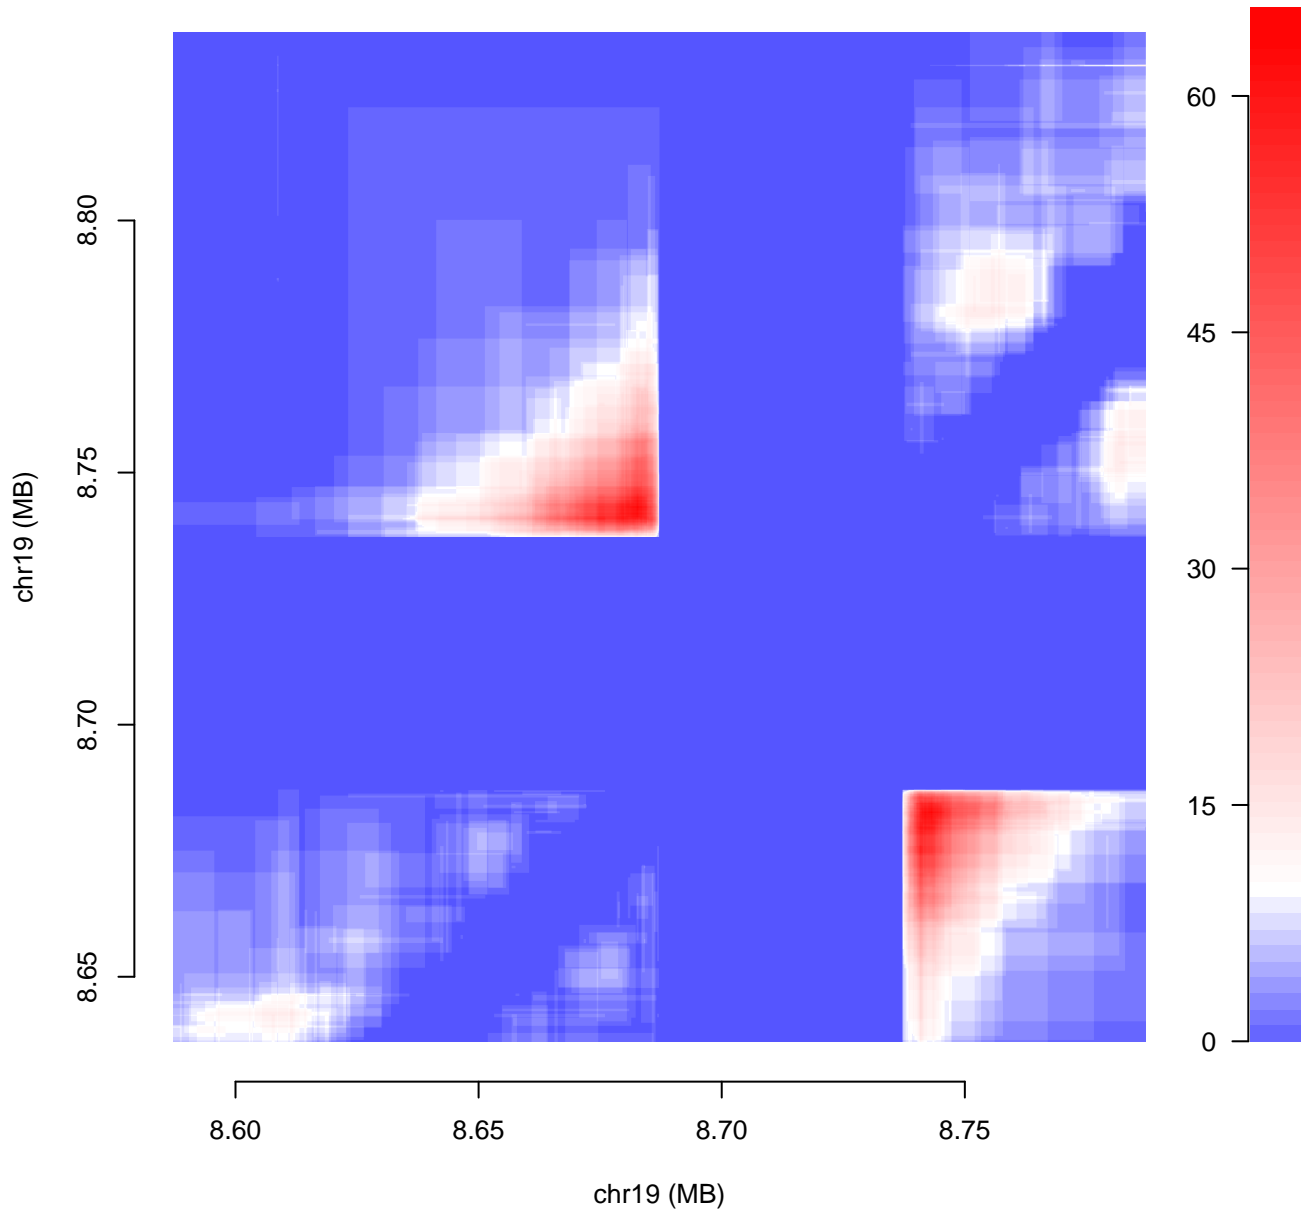

Supplement: Supplemental_Data.zip [file event_305.pdf › event_305.pdf]

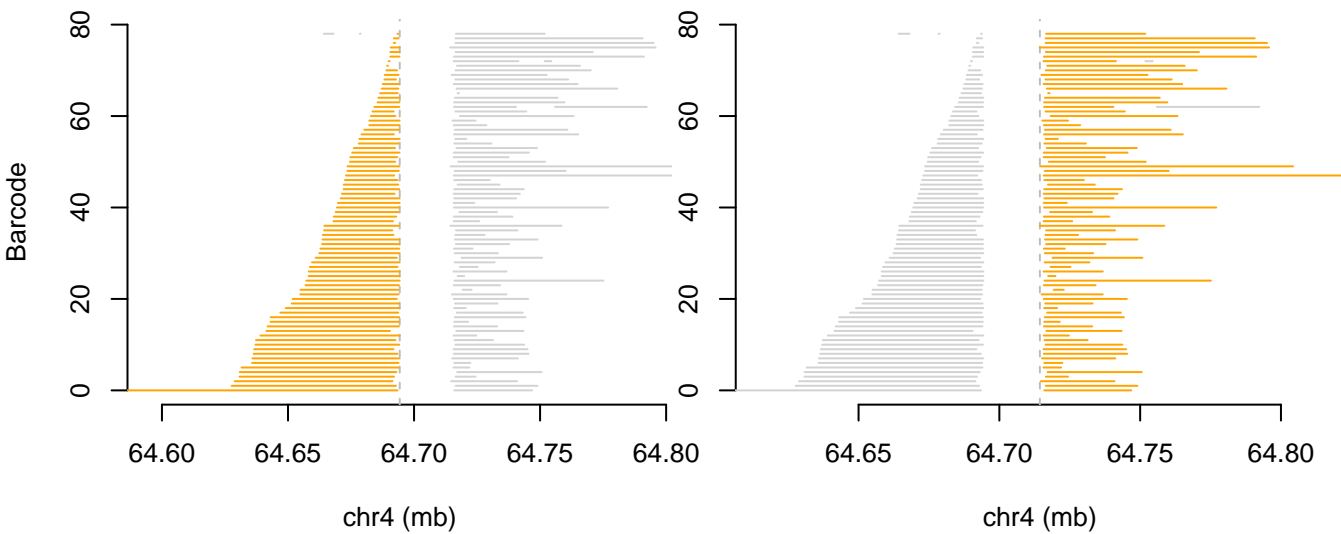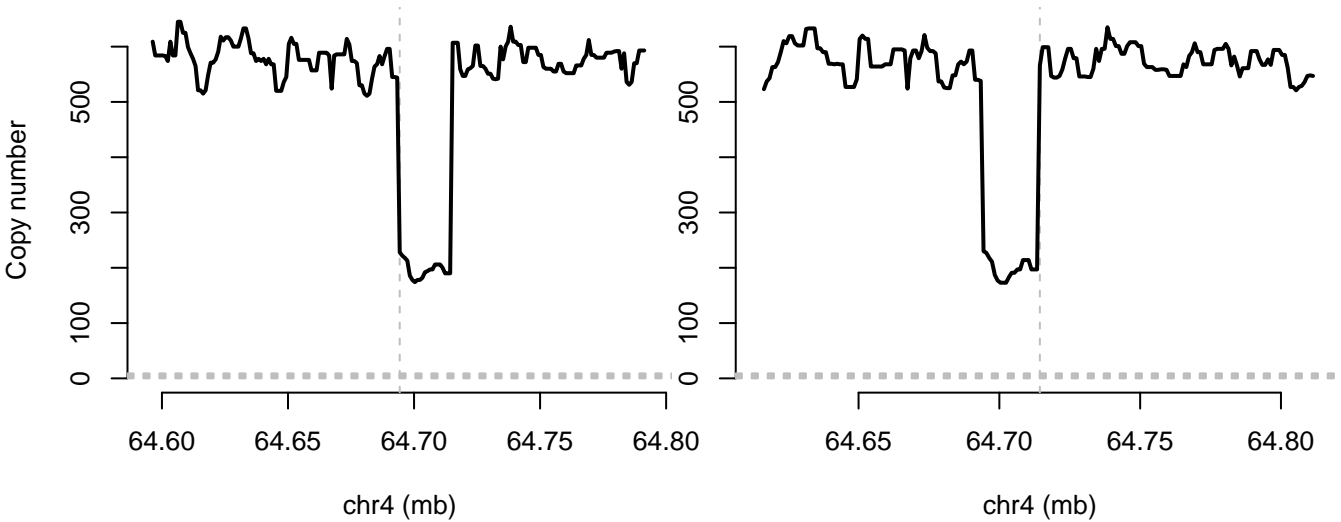

K562 chr4:64,714,382::chr4:64,694,328-+

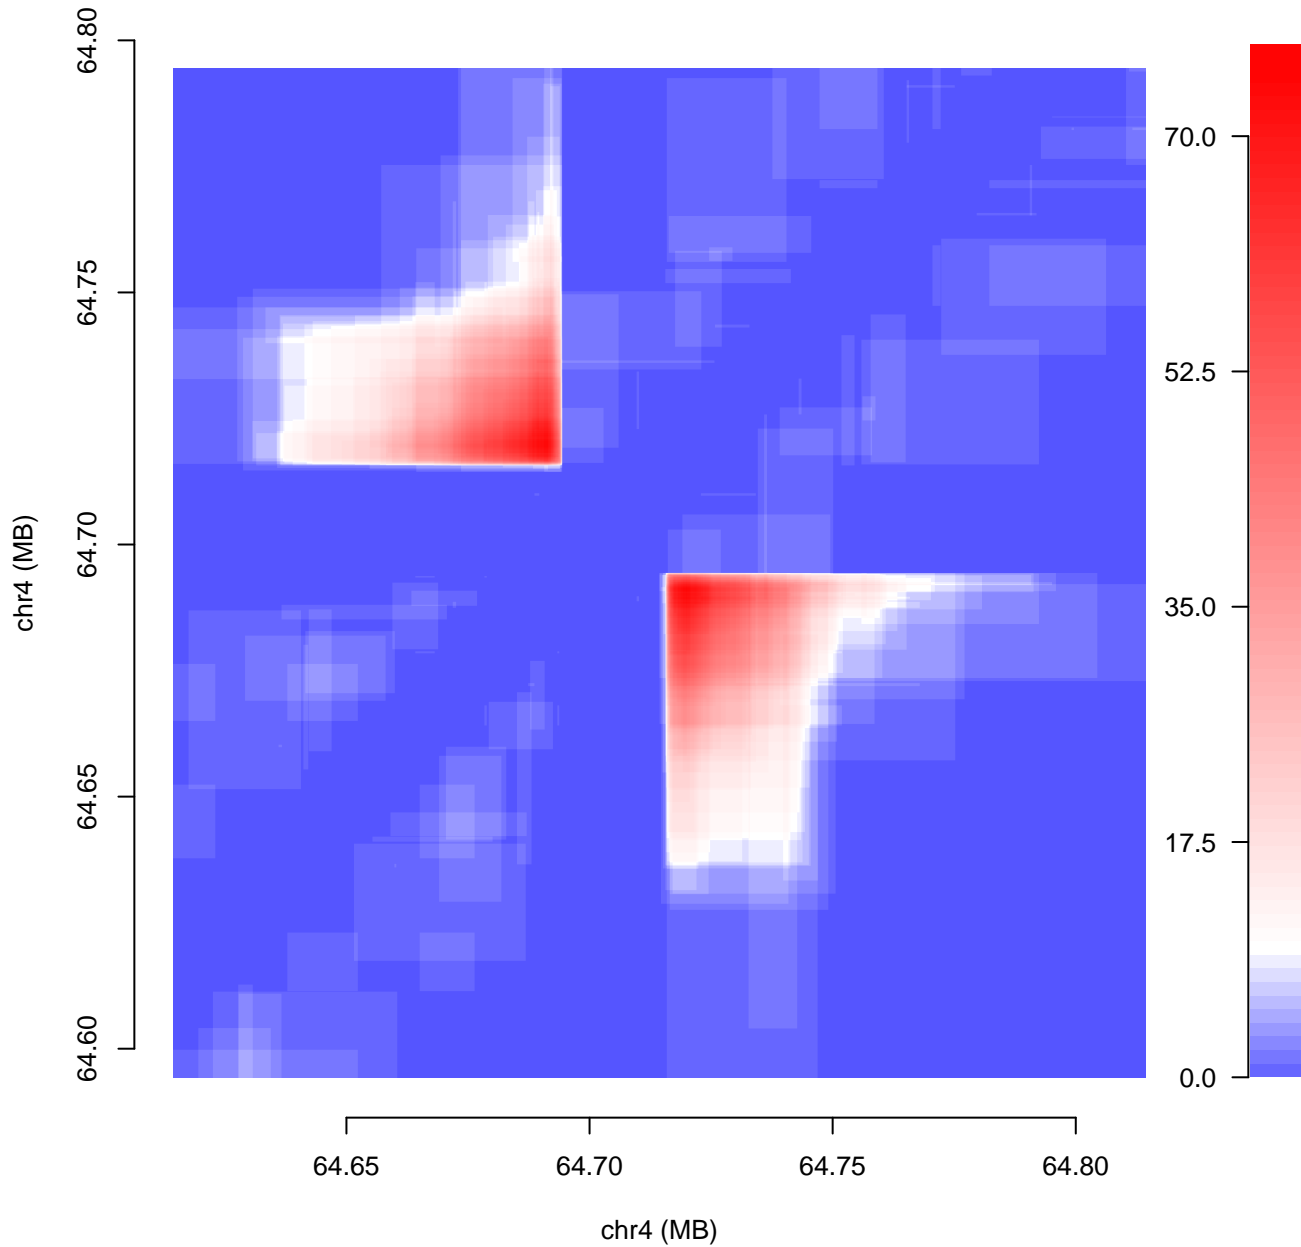

Supplement: Supplemental_Data.zip [file event_306.pdf › event_306.pdf]

Barcode

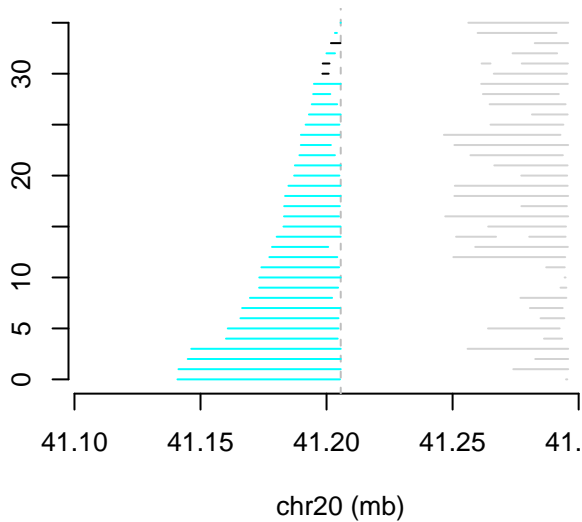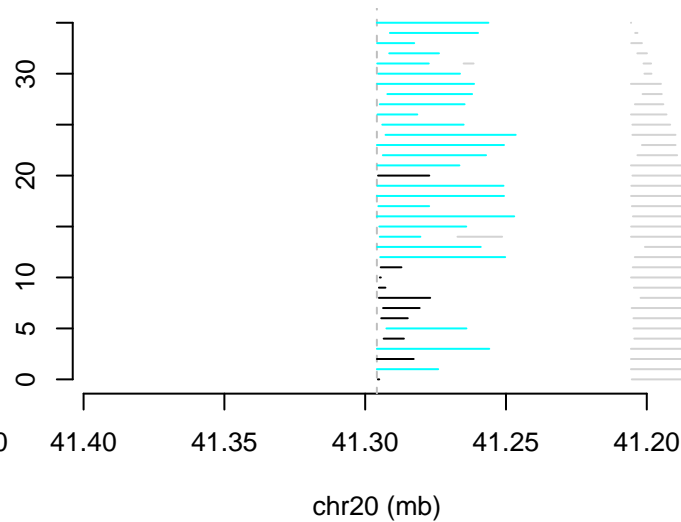

Copy number

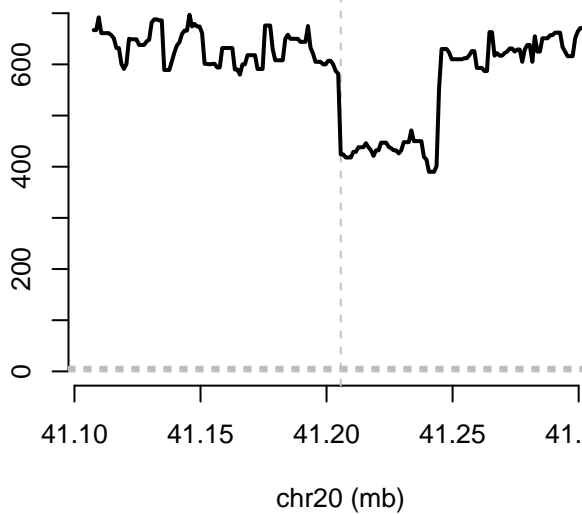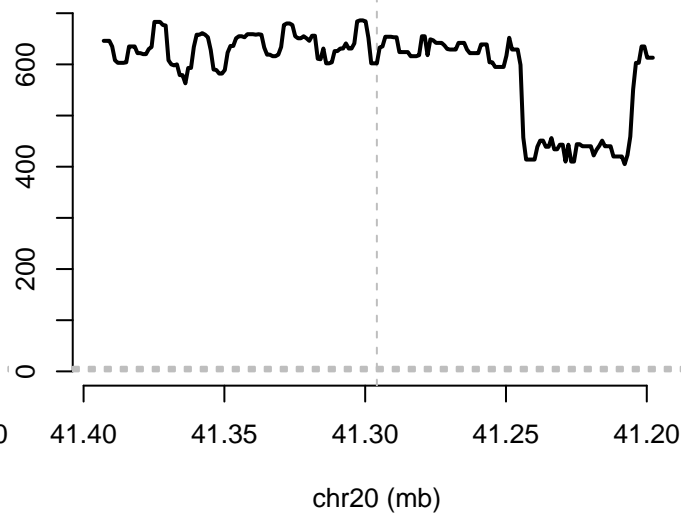

K562 chr20:41,205,627::chr20:41,295,855++

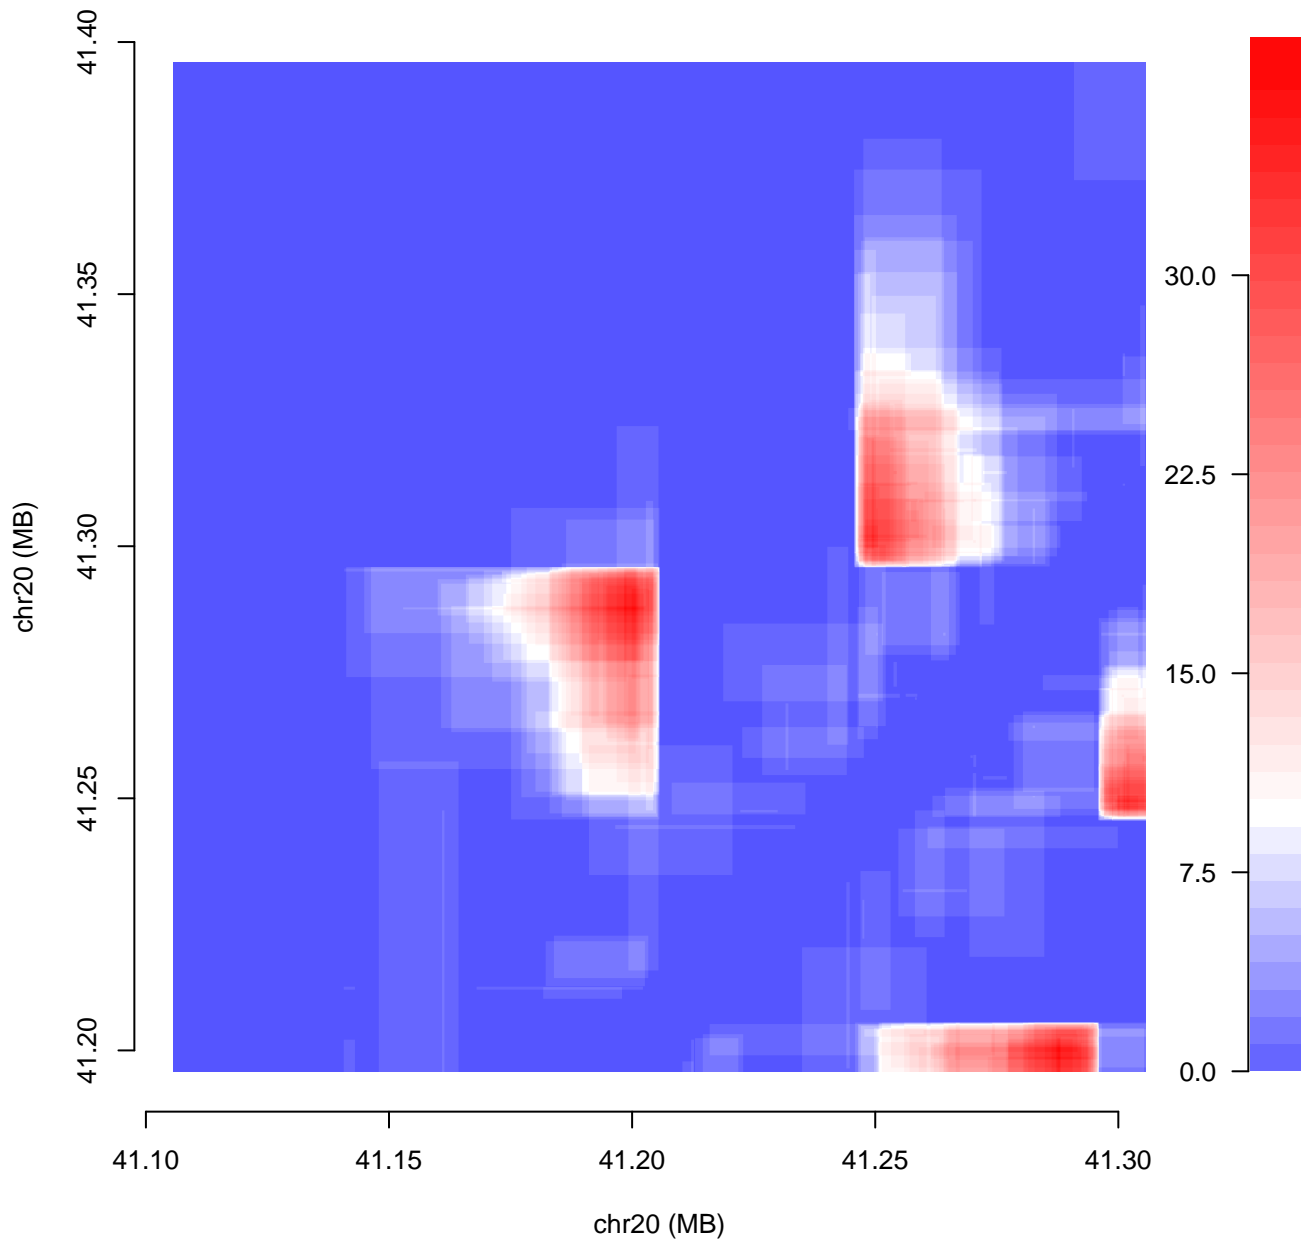

Supplement: Supplemental_Data.zip [file event_307.pdf › event_307.pdf]

Barcode

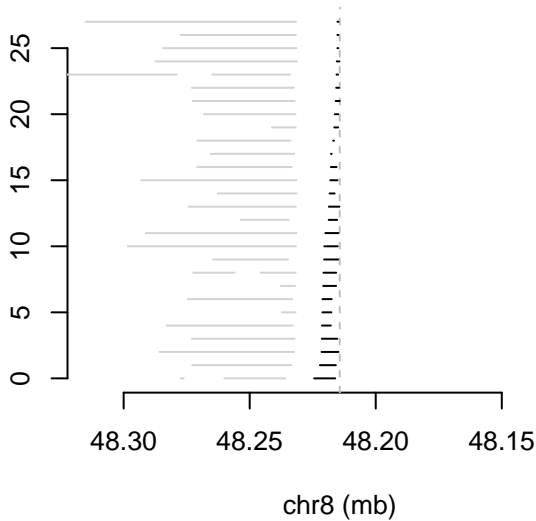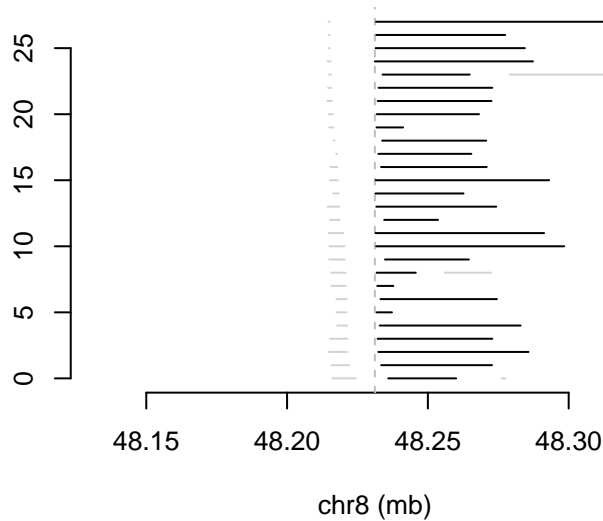

Copy number

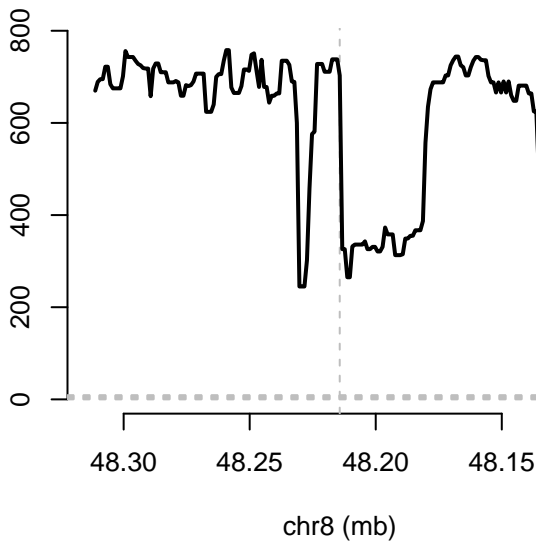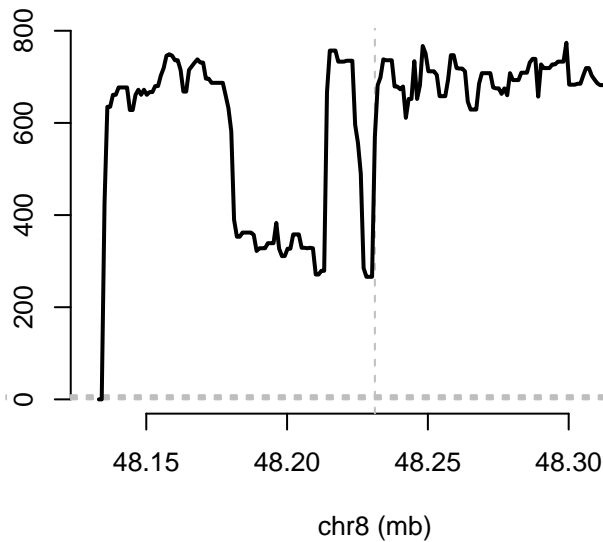

K562 chr8:48,214,276::chr8:48,231,173--

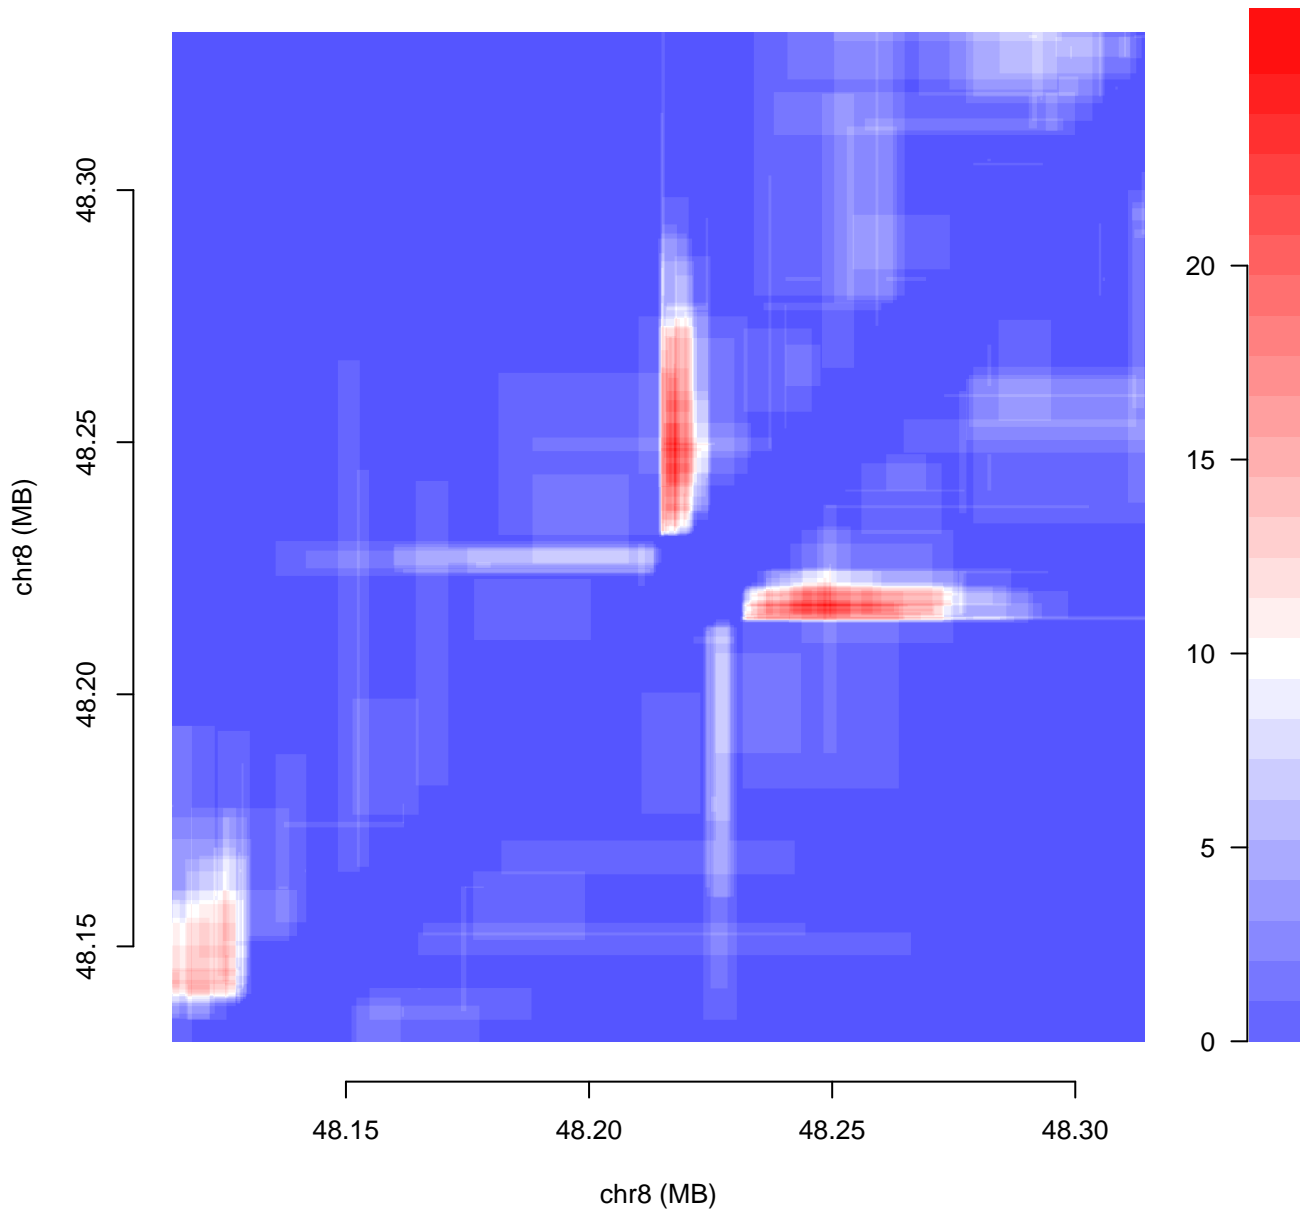

Supplement: Supplemental_Data.zip [file event_308.pdf › event_308.pdf]

Barcode

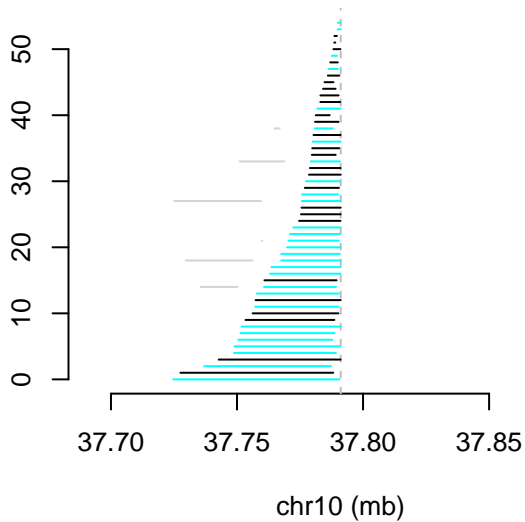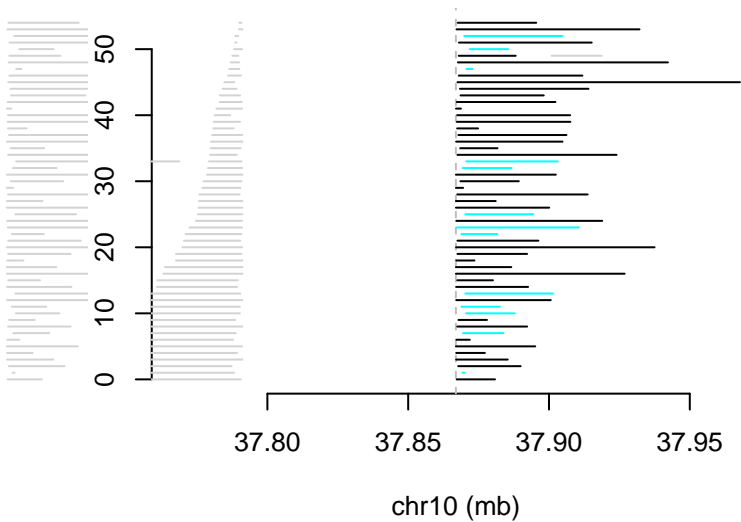

Copy number

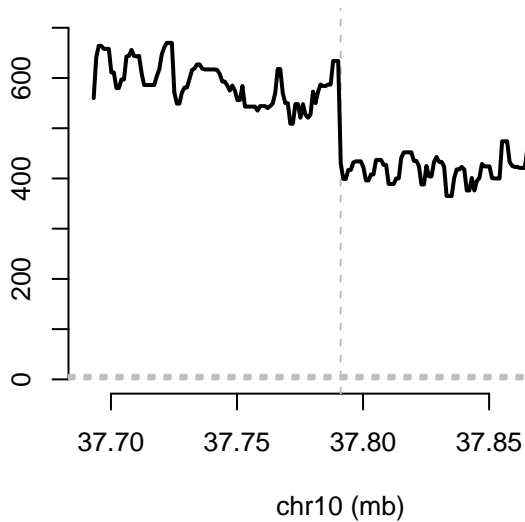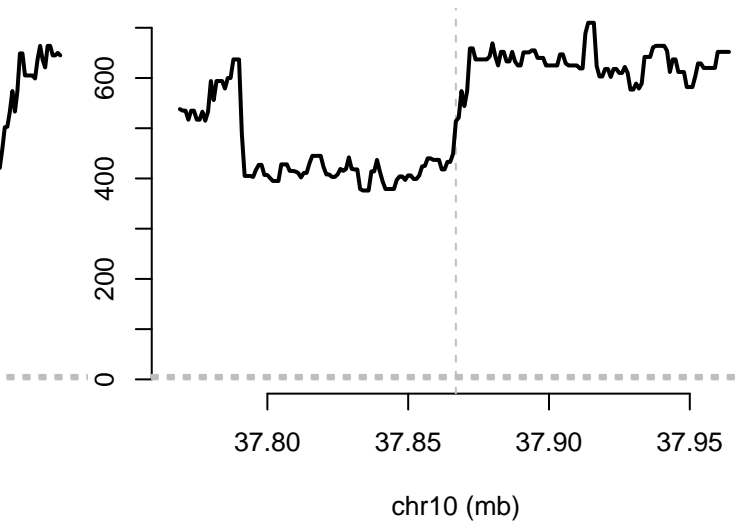

K562 chr10:37,791,149::chr10:37,866,936+-

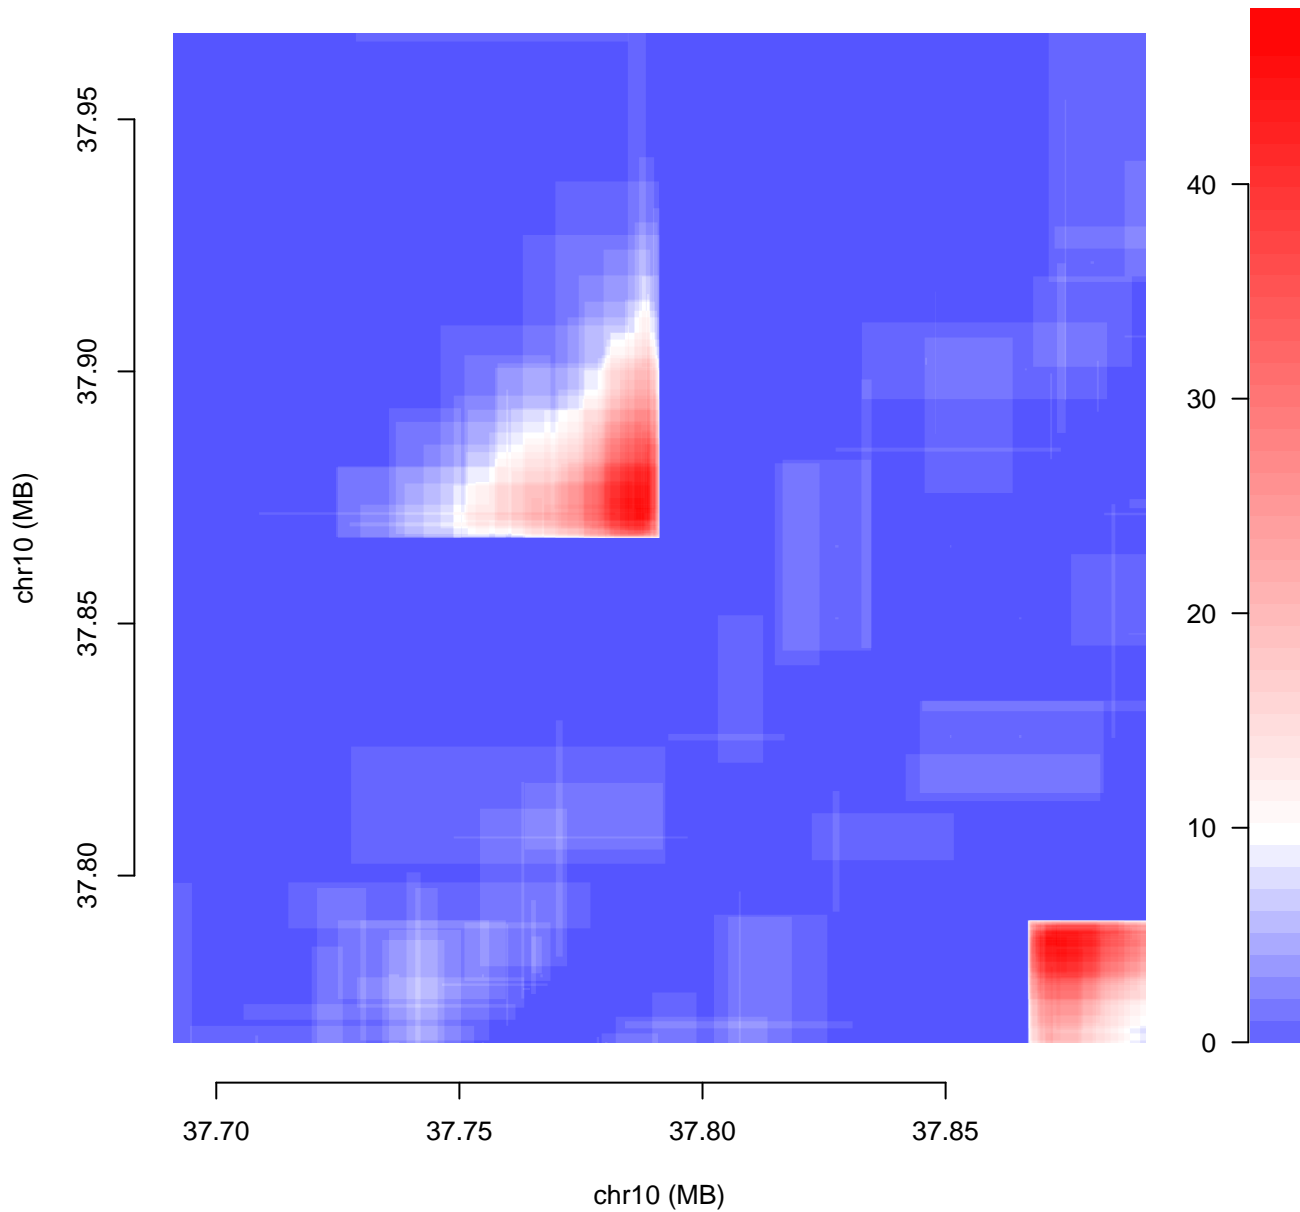

Supplement: Supplemental_Data.zip [file event_309.pdf › event_309.pdf]

Barcode

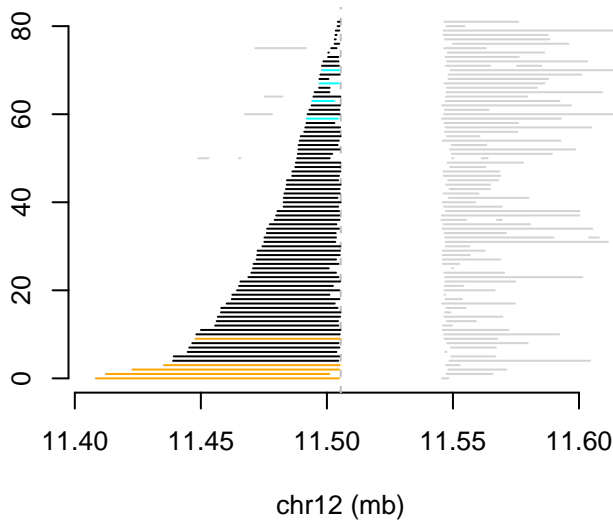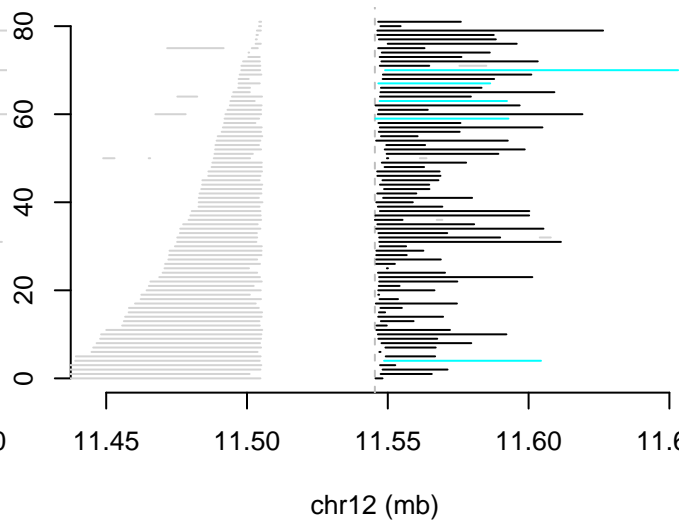

Copy number

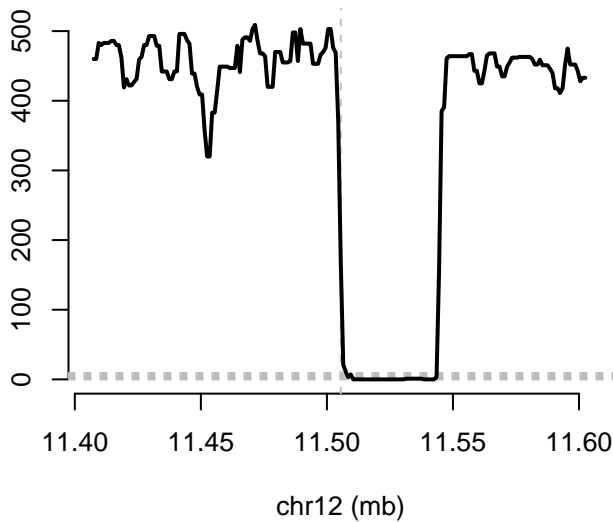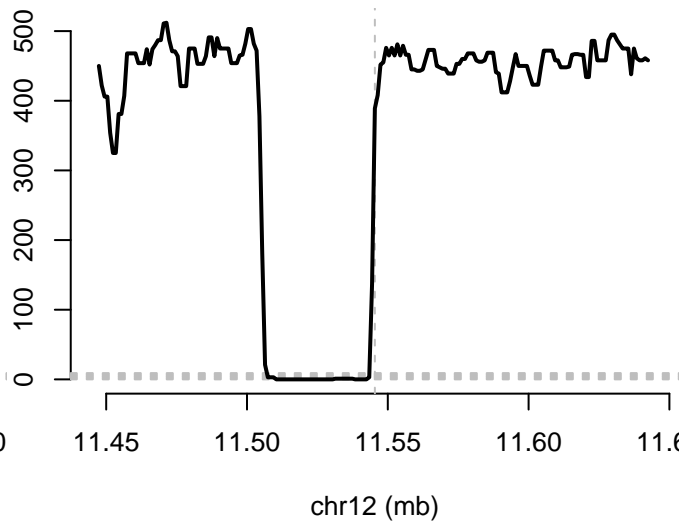

K562 chr12:11,545,406::chr12:11,505,486-+

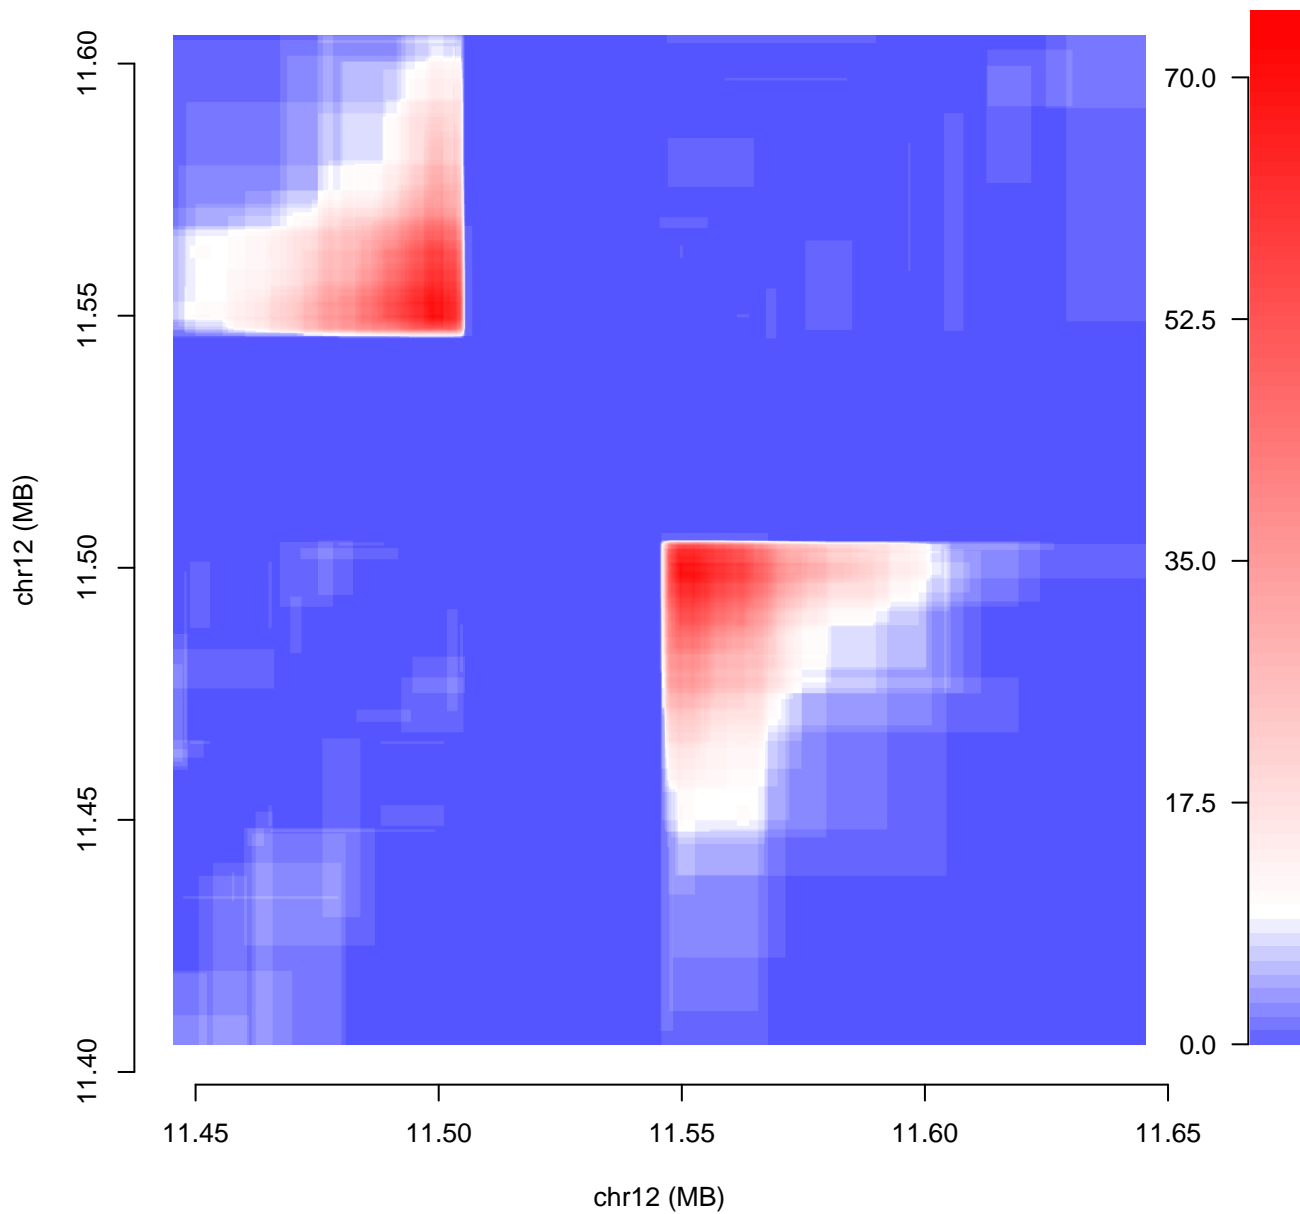

Supplement: Supplemental_Data.zip [file event_31.pdf › event_31.pdf]

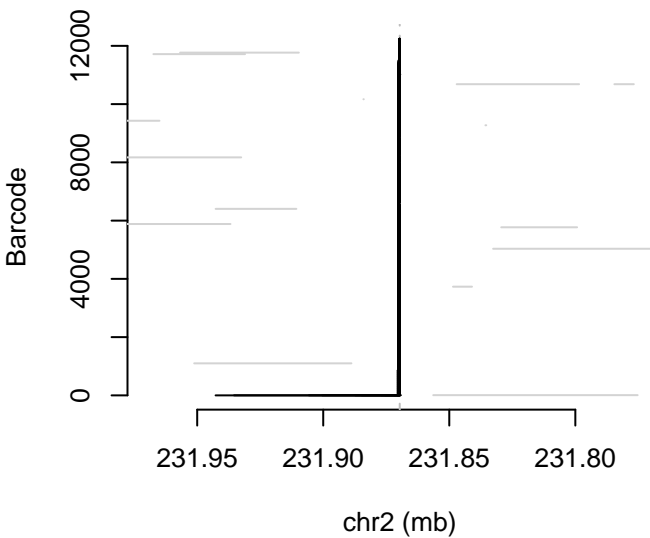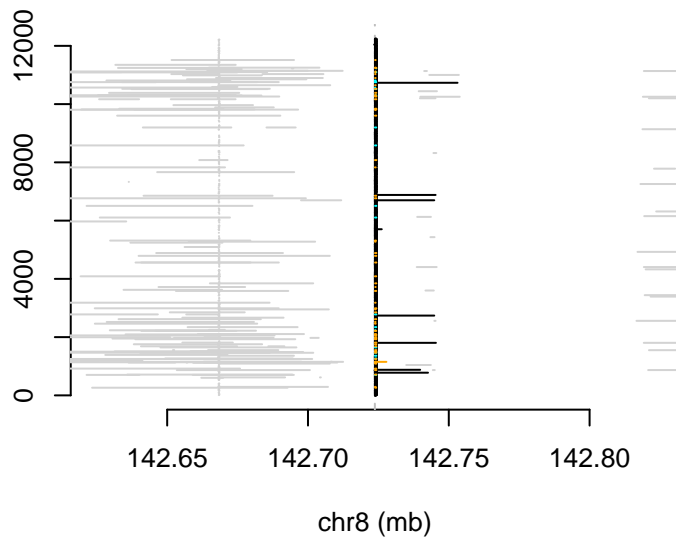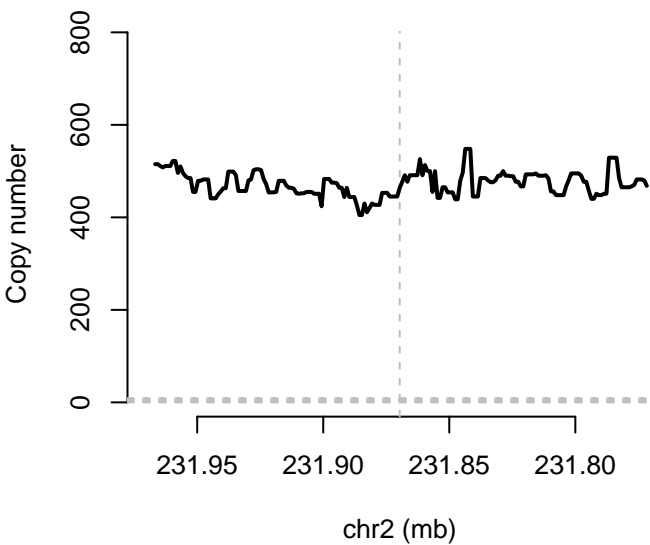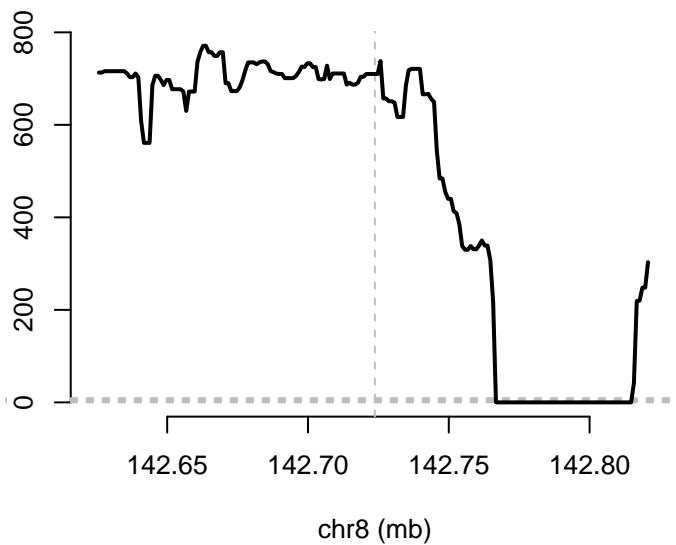

K562 chr2:231,869,651::chr8:142,723,750--

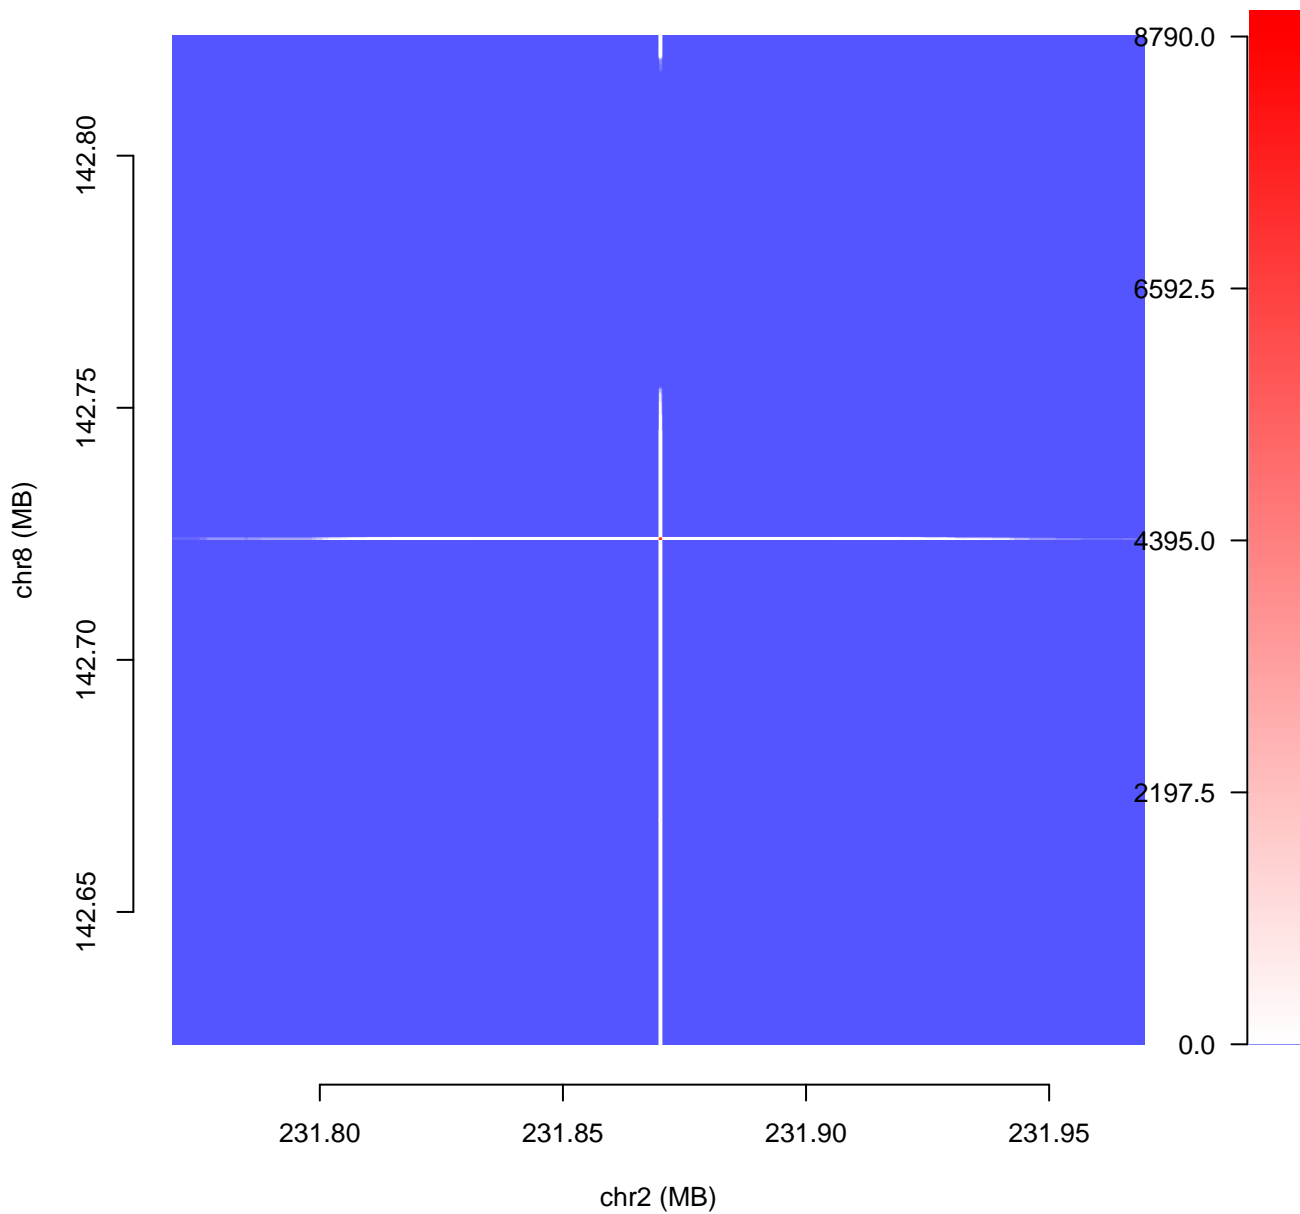

Supplement: Supplemental_Data.zip [file event_310.pdf › event_310.pdf]

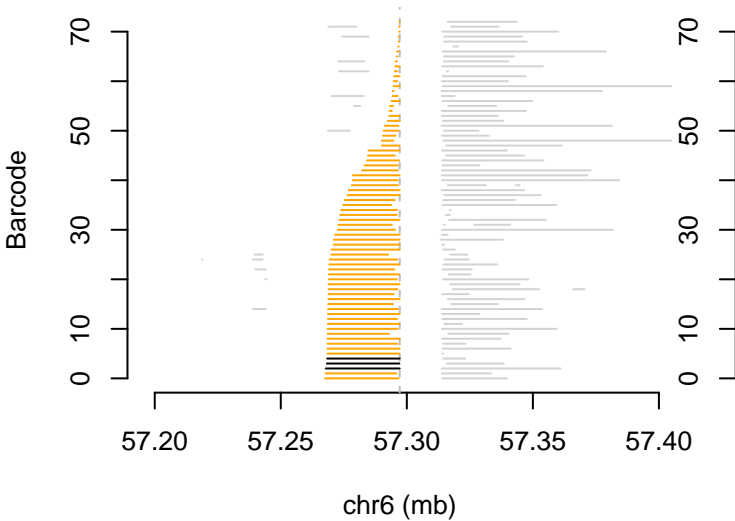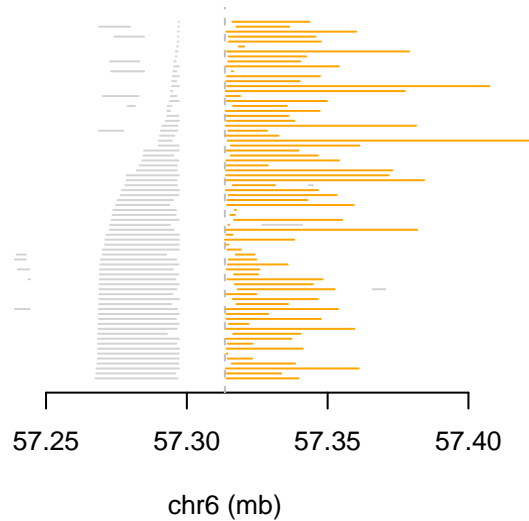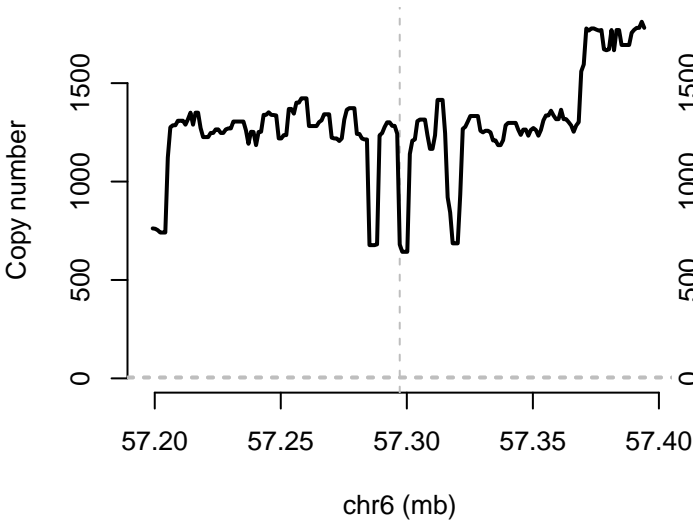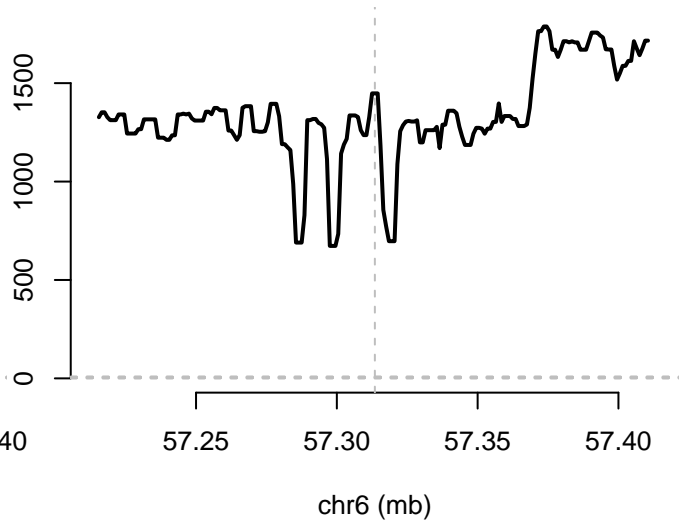

K562 chr6:57,313,508::chr6:57,297,190-+

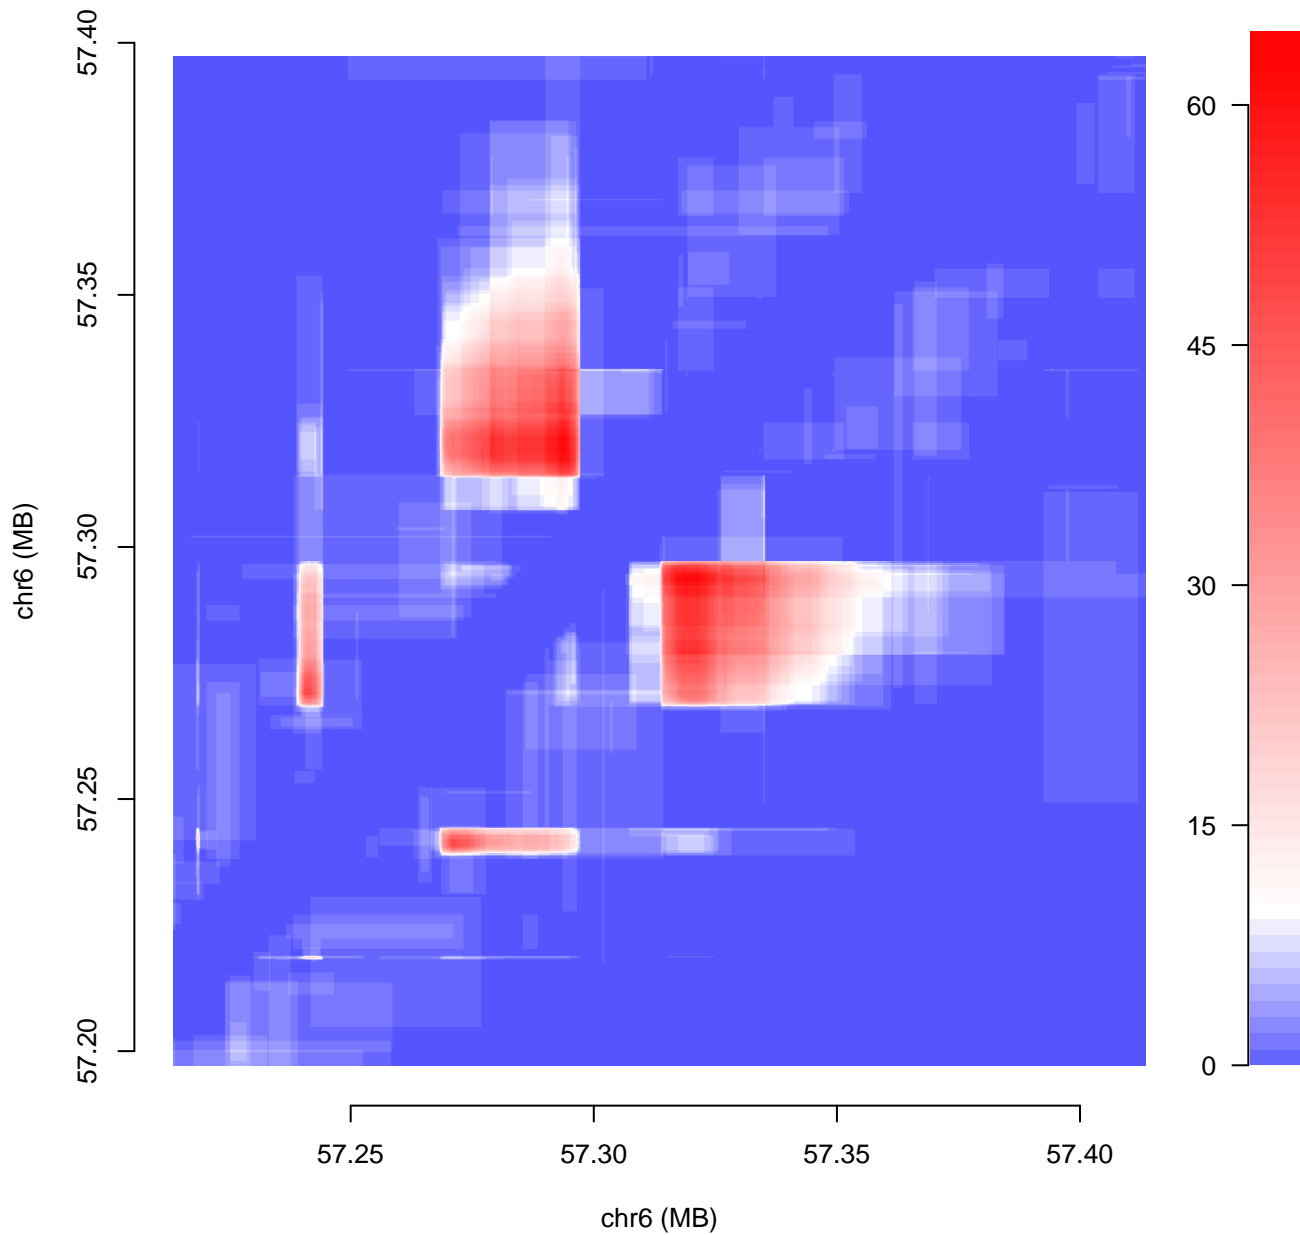

Supplement: Supplemental_Data.zip [file event_311.pdf › event_311.pdf]

Barcode

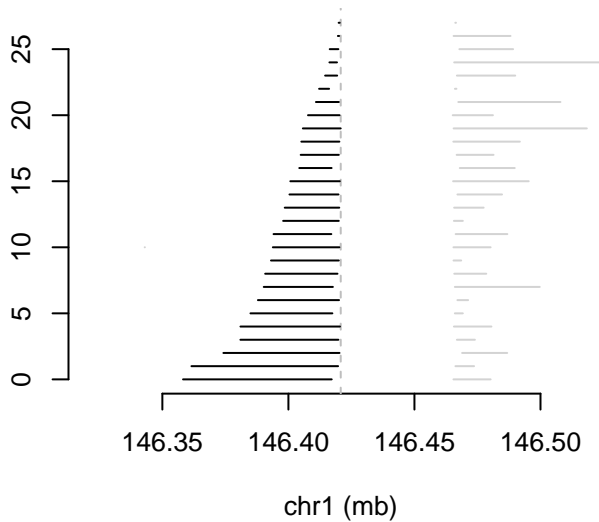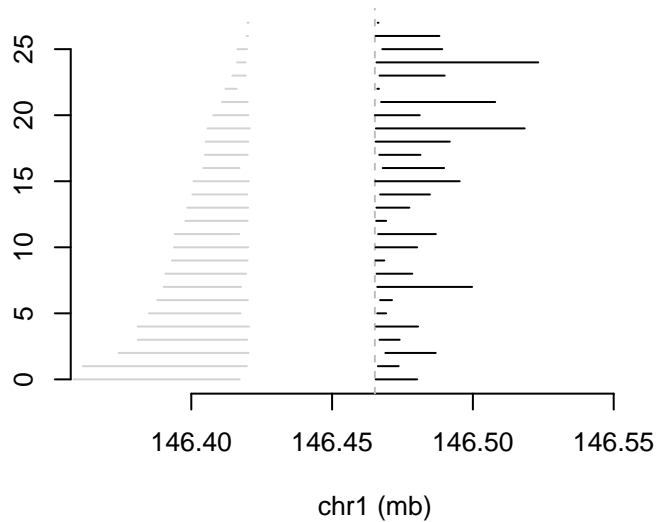

Copy number

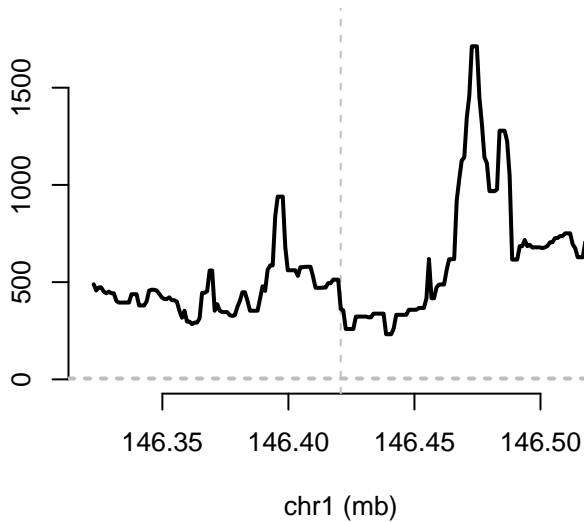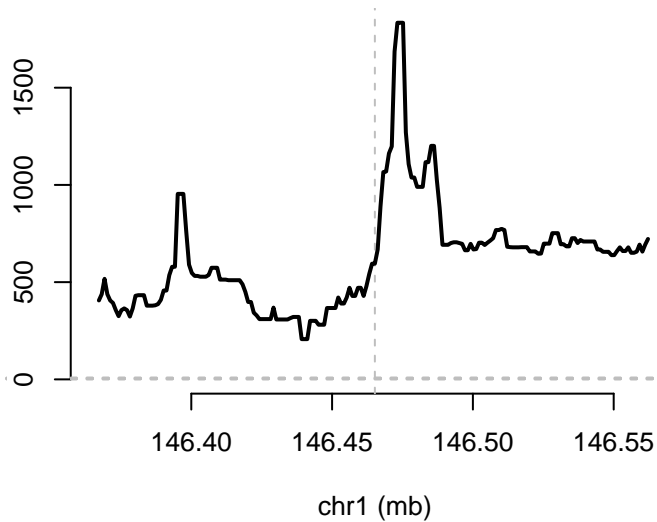

K562 chr1:146,420,763::chr1:146,465,191+-

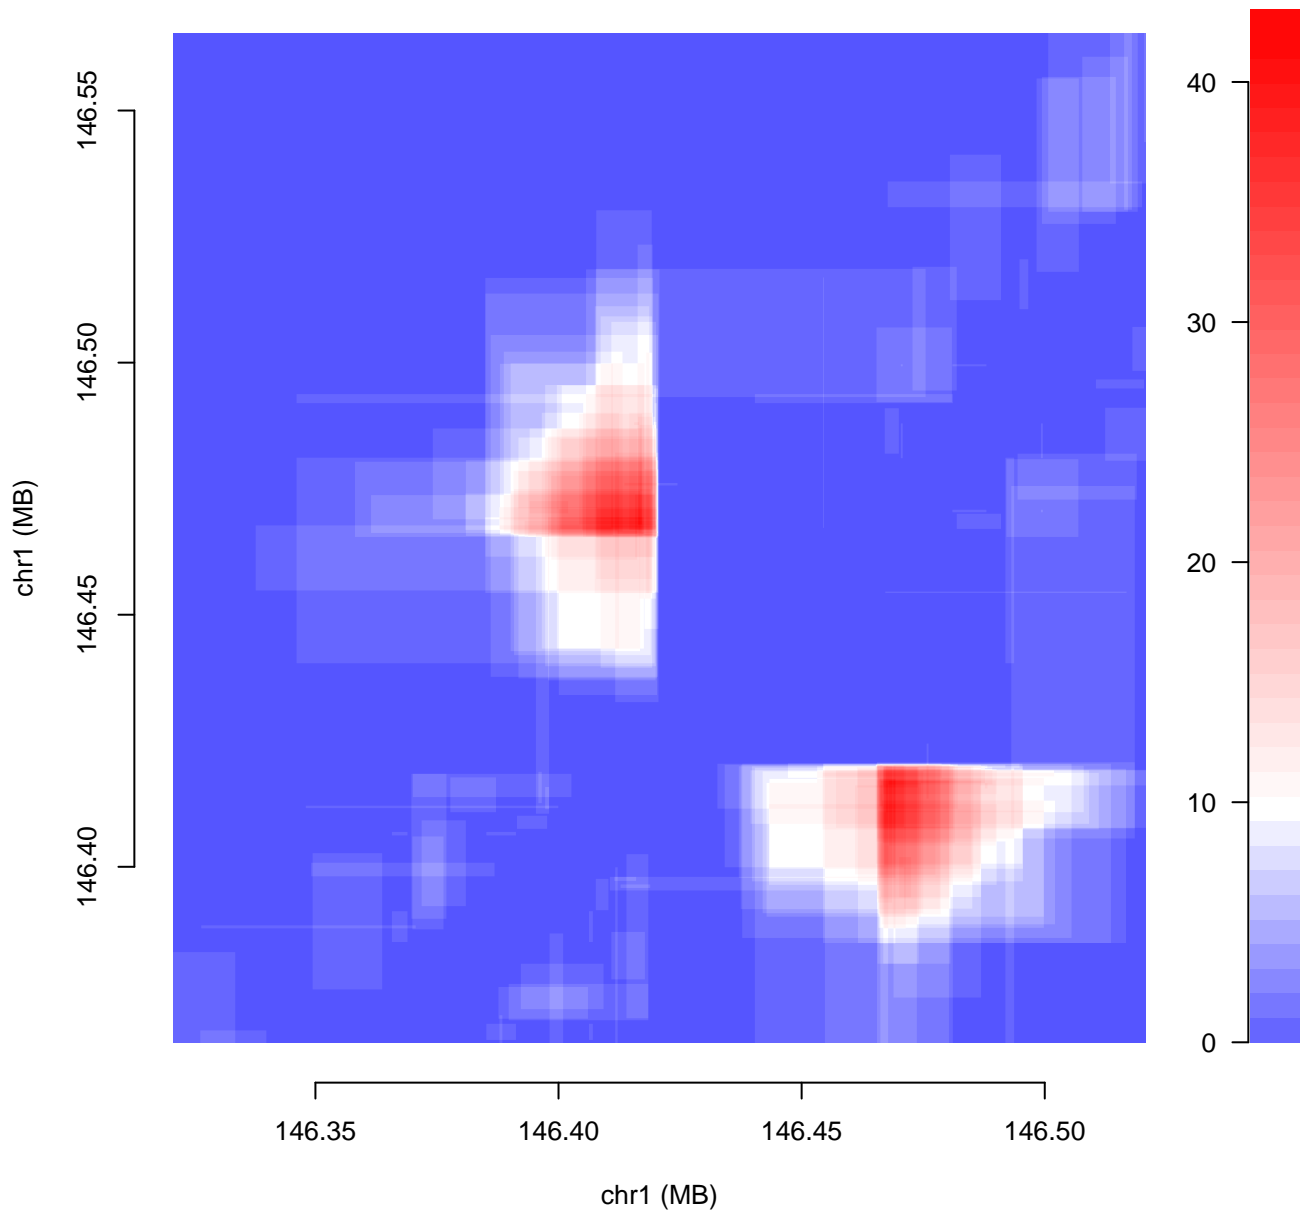

Supplement: Supplemental_Data.zip [file event_312.pdf › event_312.pdf]

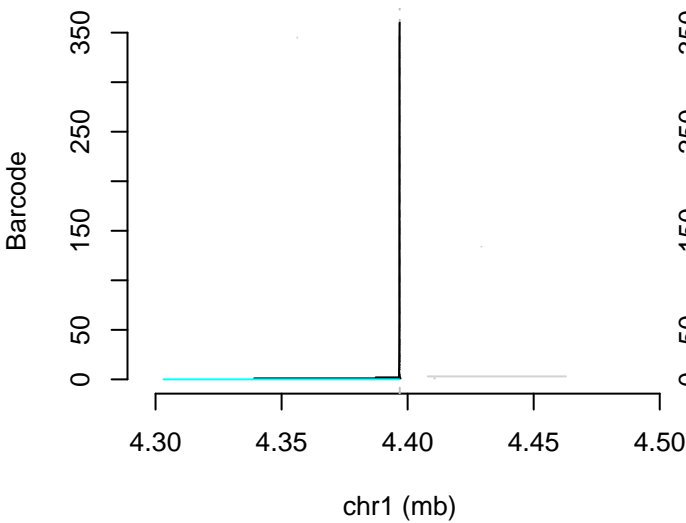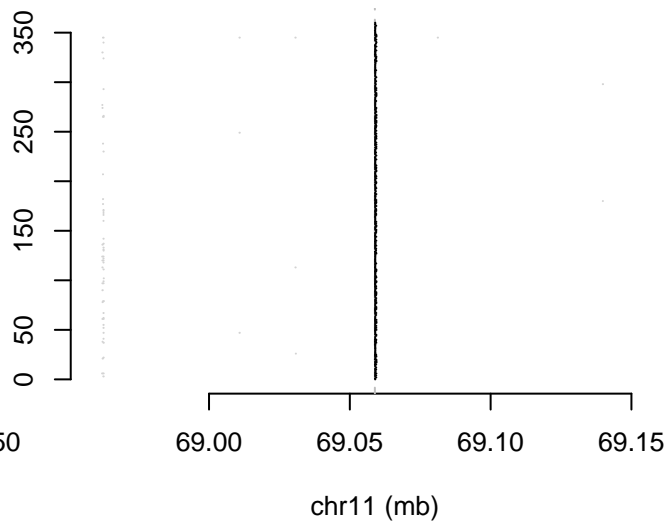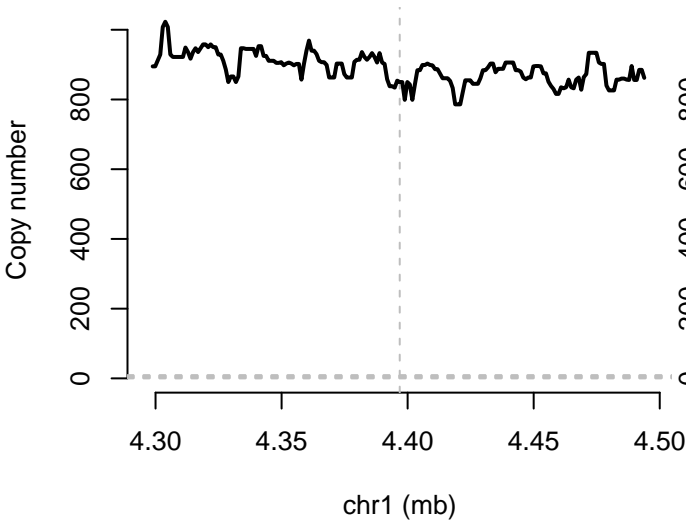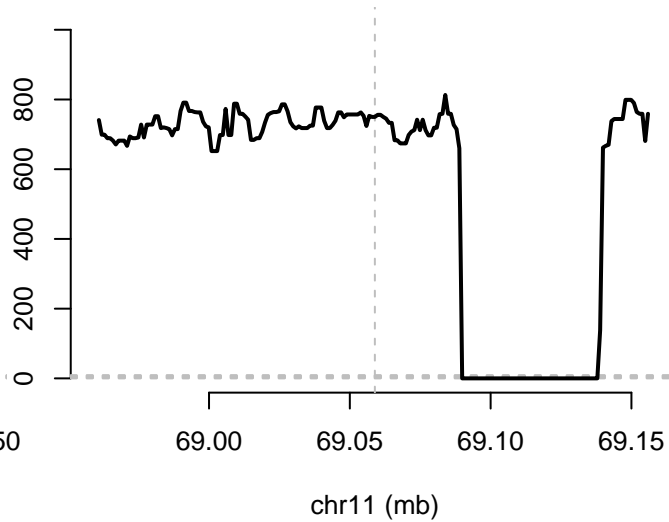

K562 chr1:4,396,868::chr11:69,058,898+-

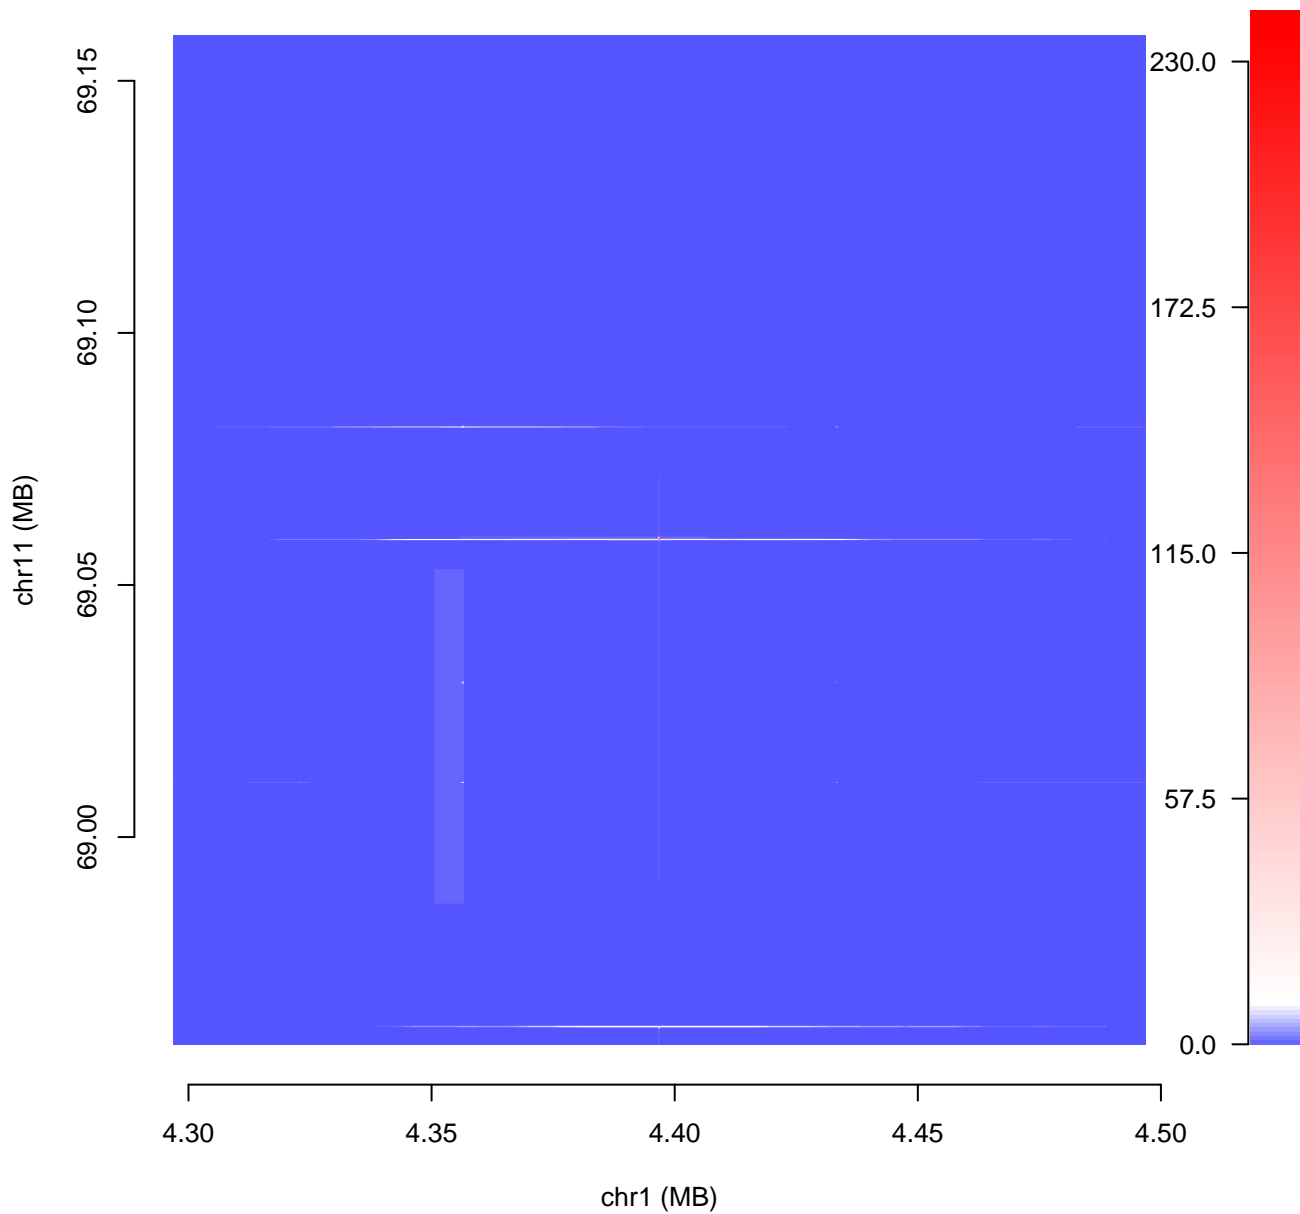

Supplement: Supplemental_Data.zip [file event_313.pdf › event_313.pdf]

Barcode

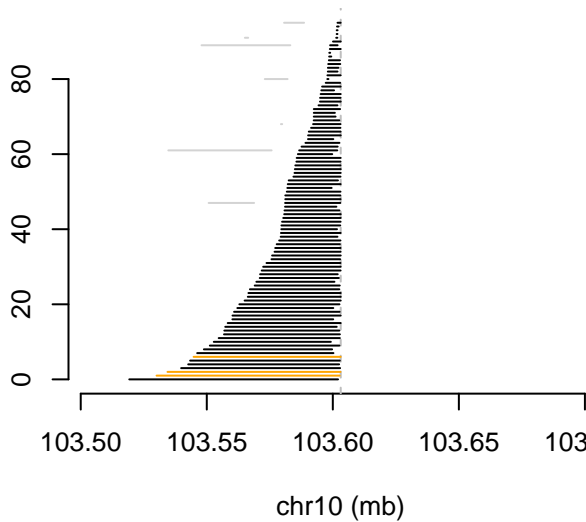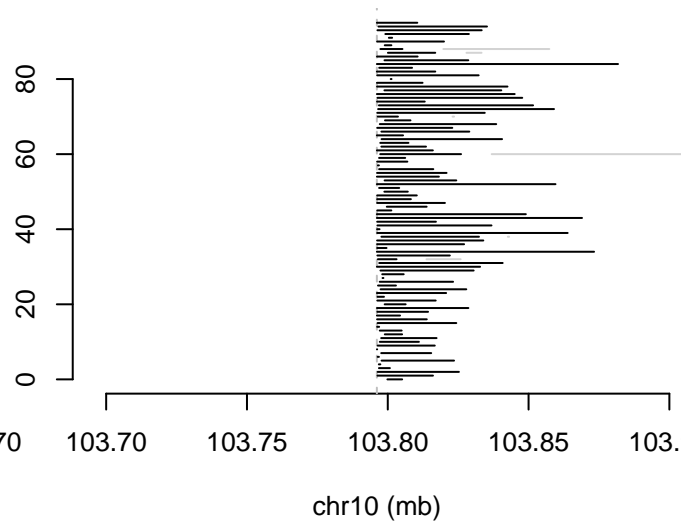

Copy number

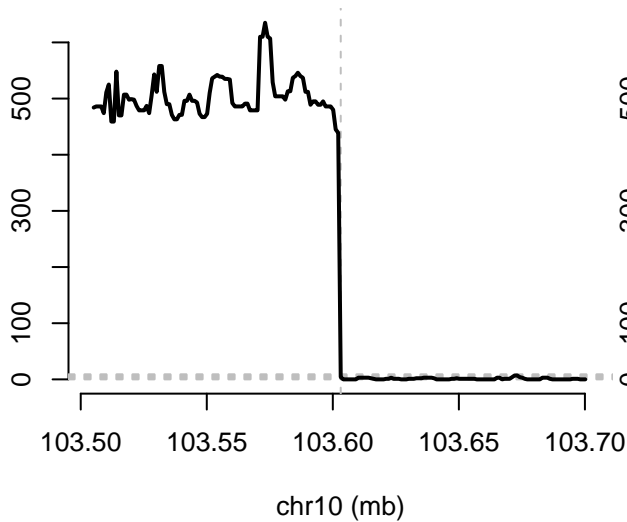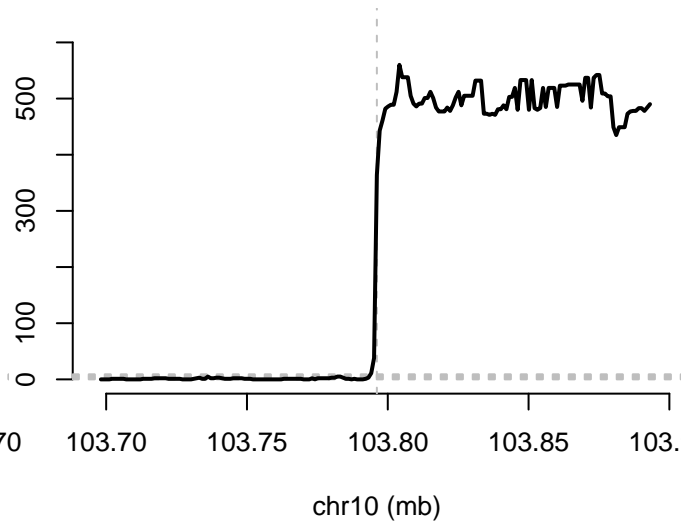

K562 chr10:103,796,133::chr10:103,603,142-+

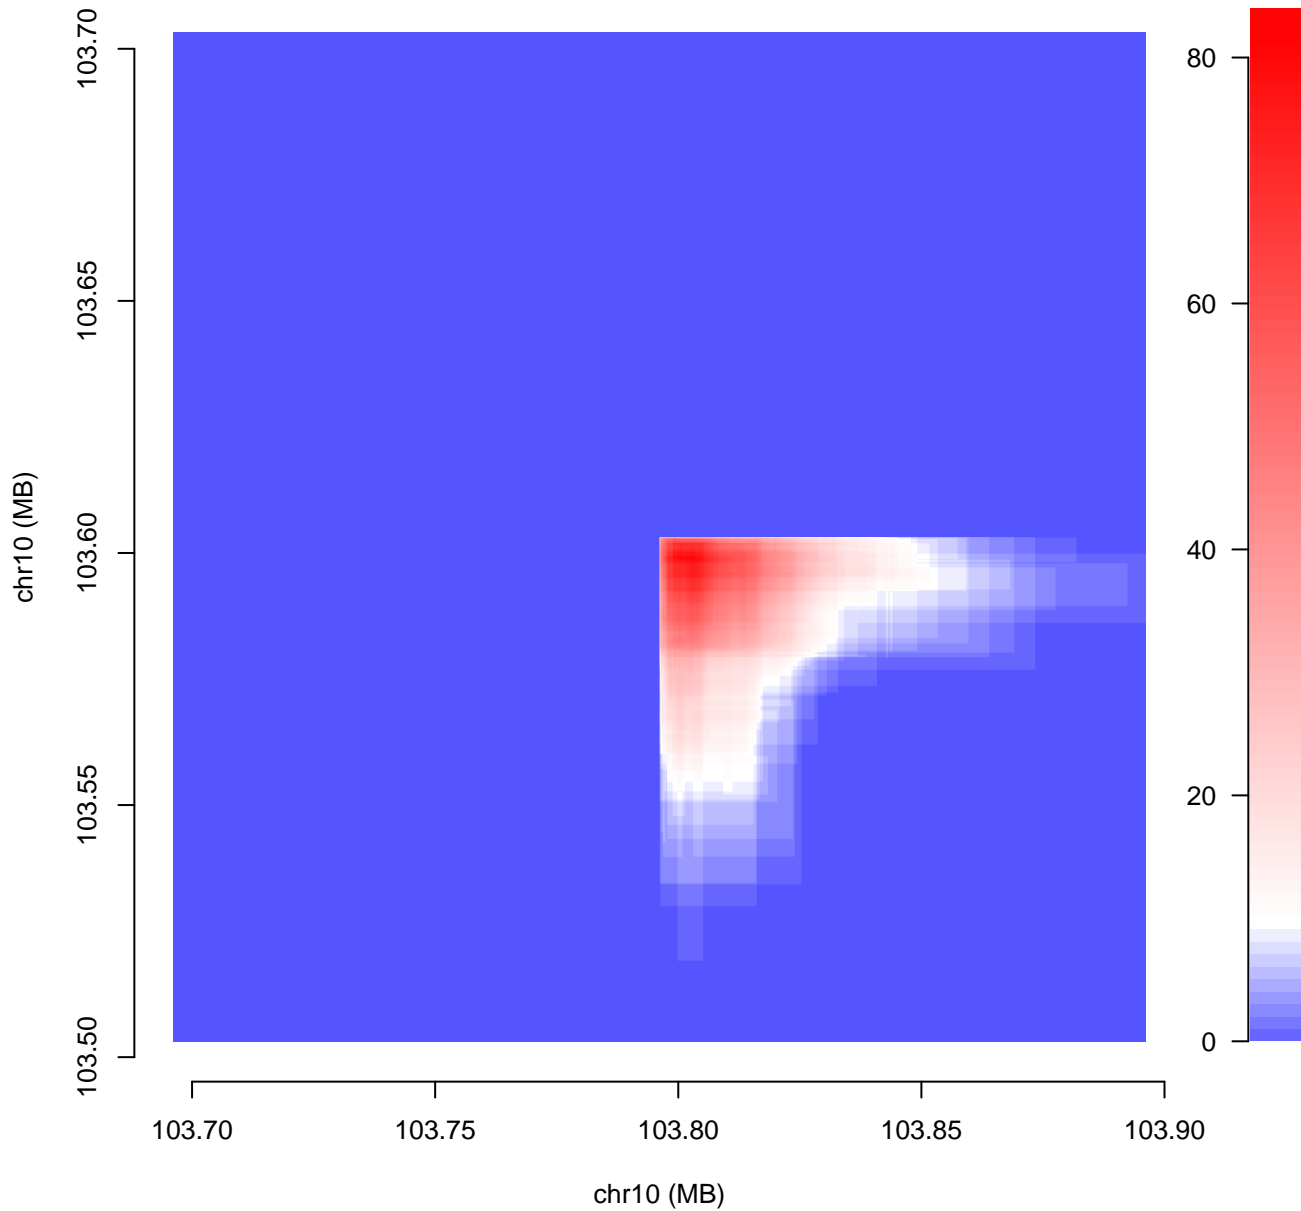

Supplement: Supplemental_Data.zip [file event_314.pdf › event_314.pdf]

Barcode

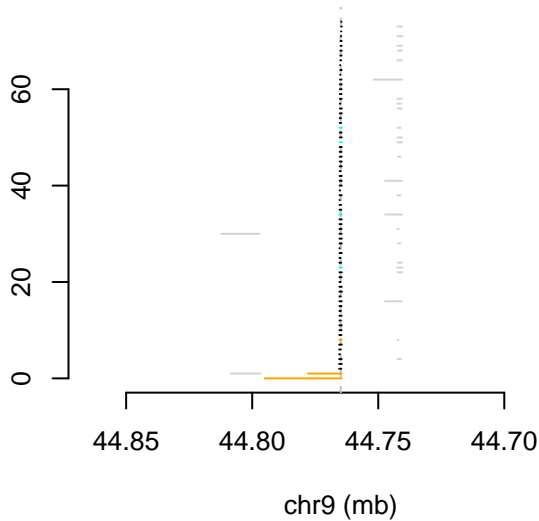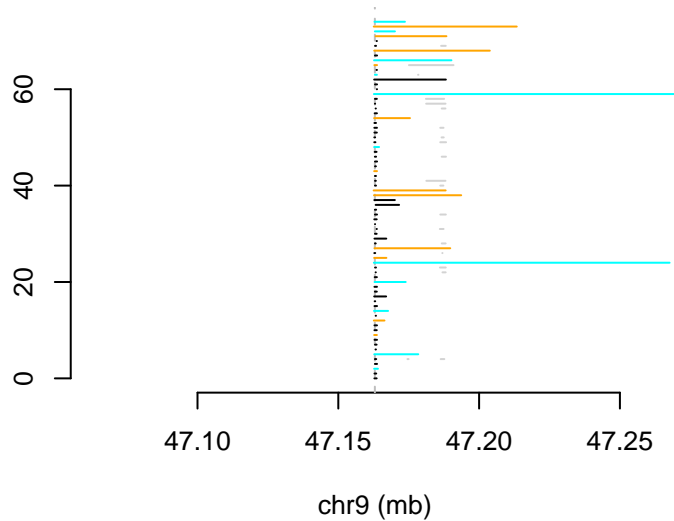

Copy number

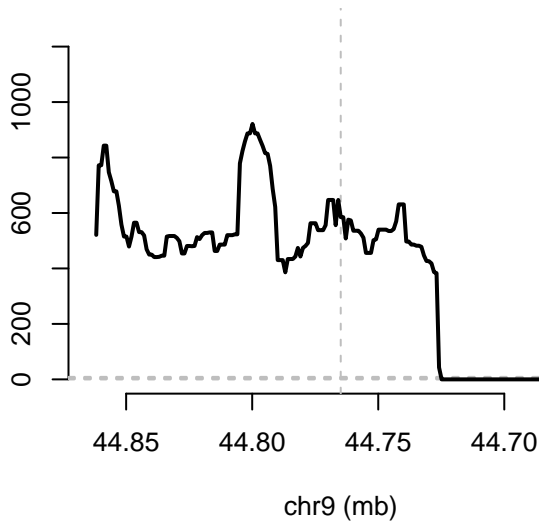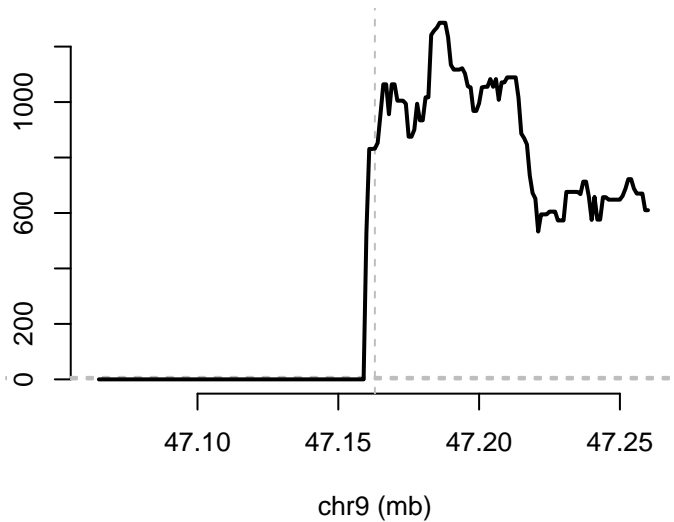

K562 chr9:44,764,876::chr9:47,162,983--

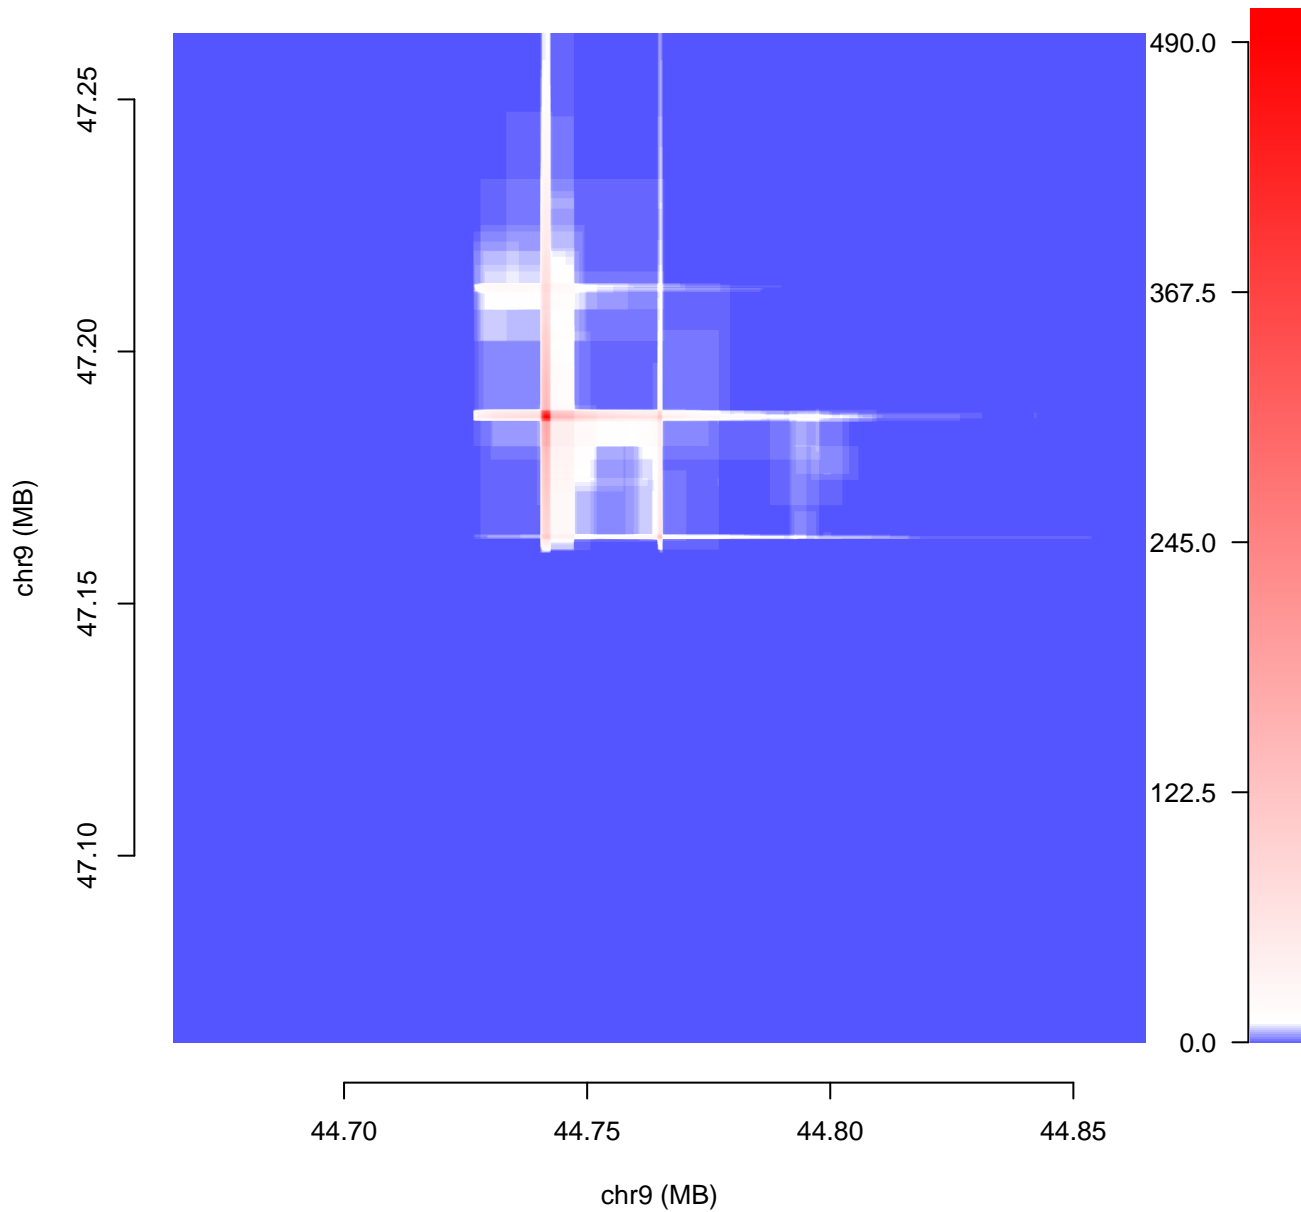

Supplement: Supplemental_Data.zip [file event_315.pdf › event_315.pdf]

Barcode

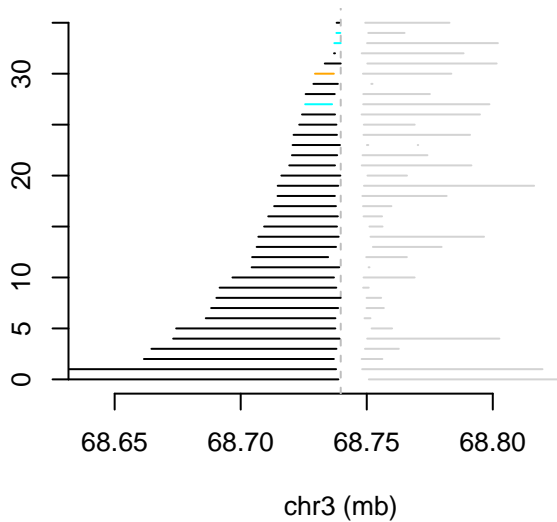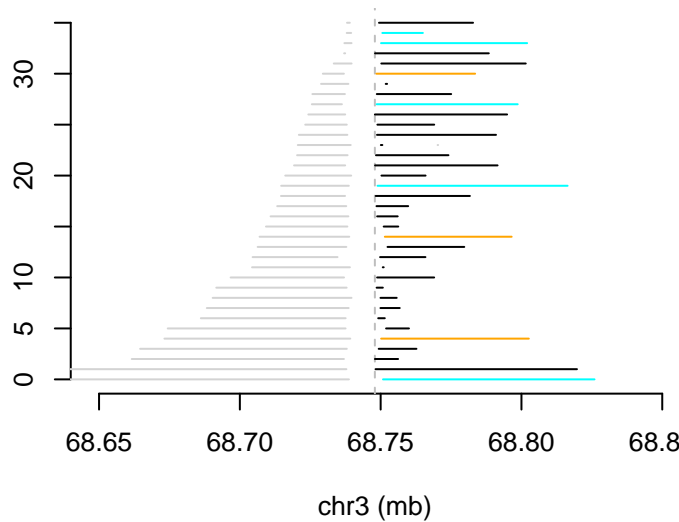

Copy number

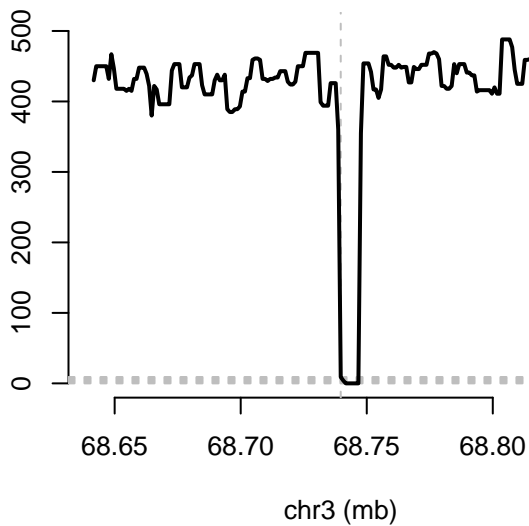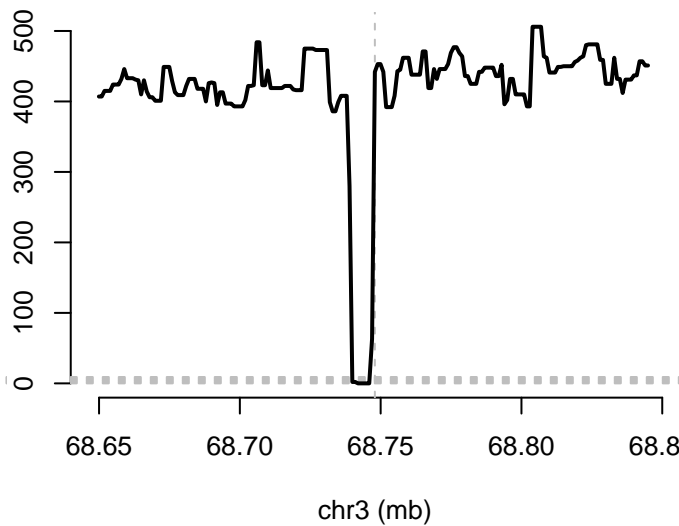

K562 chr3:68,739,682::chr3:68,747,948+-

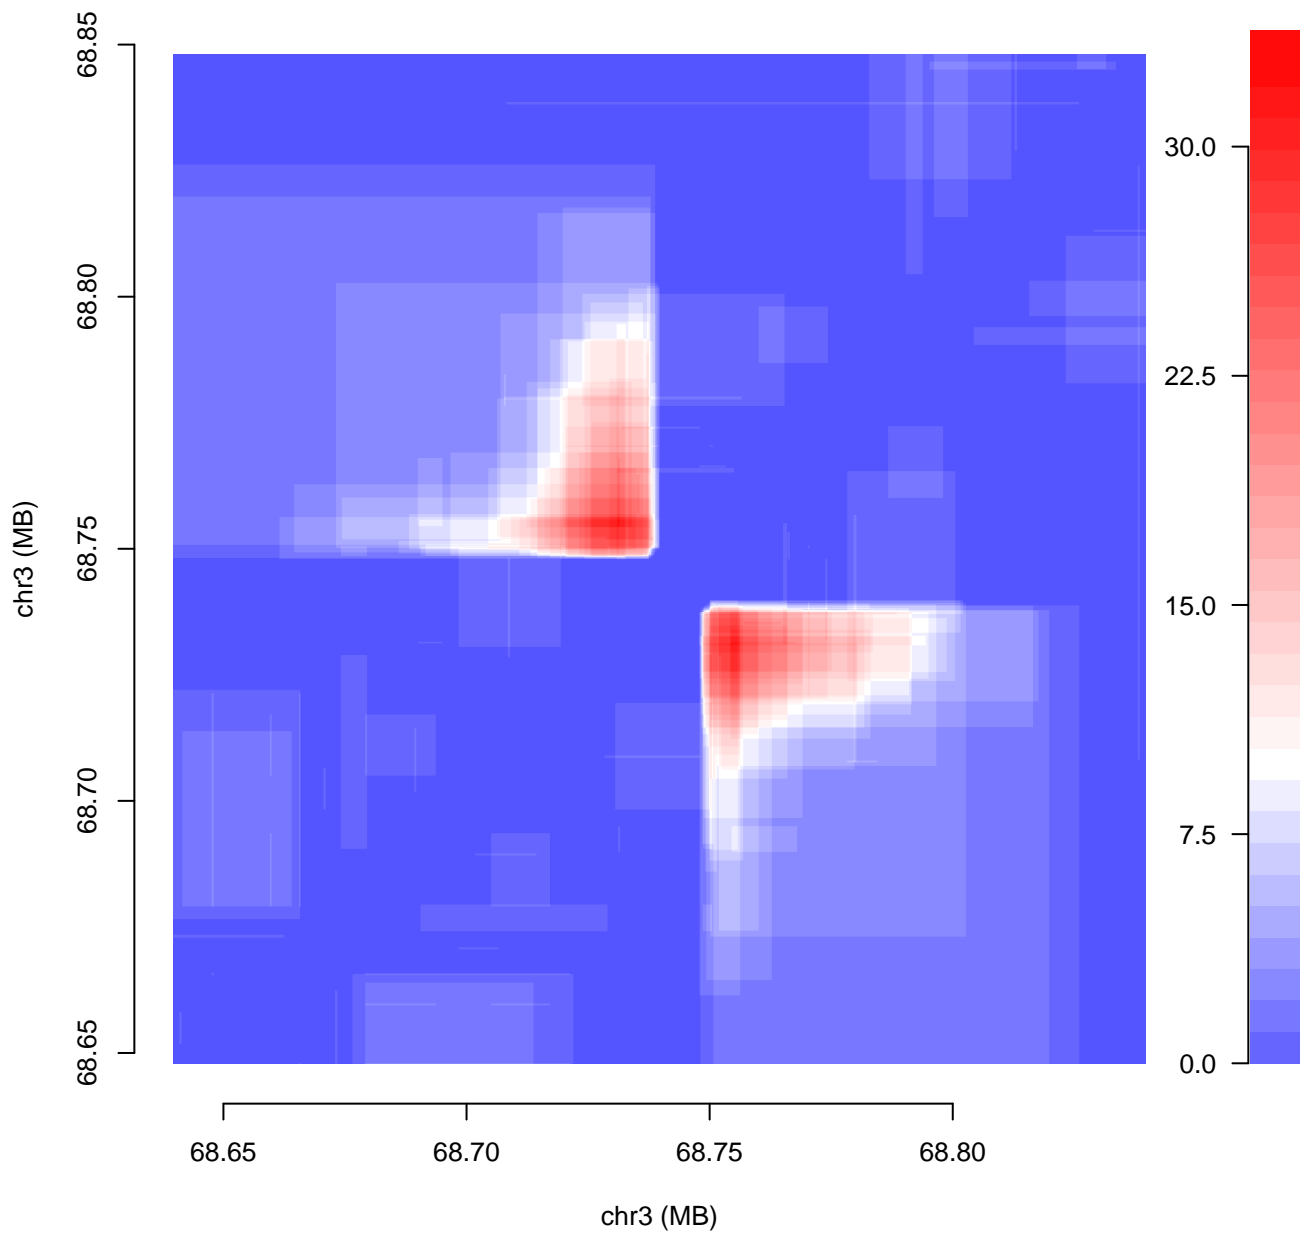

Supplement: Supplemental_Data.zip [file event_316.pdf › event_316.pdf]

Barcode

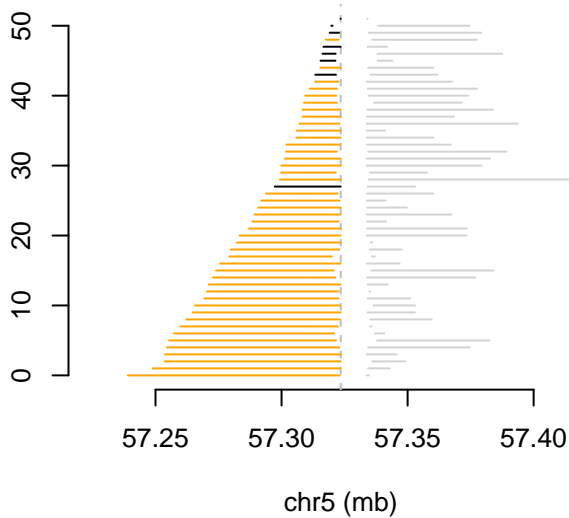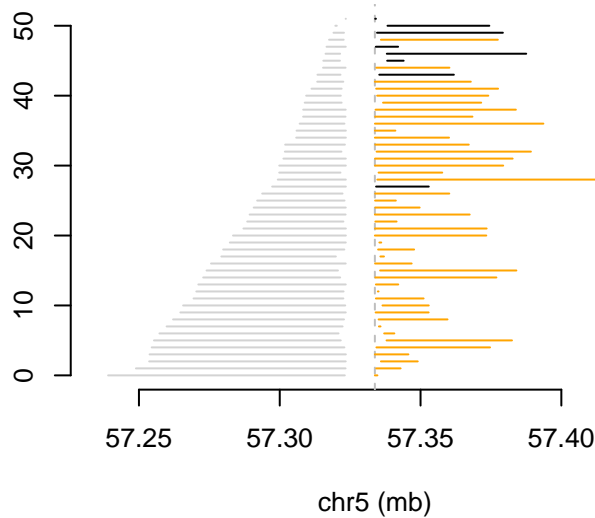

Copy number

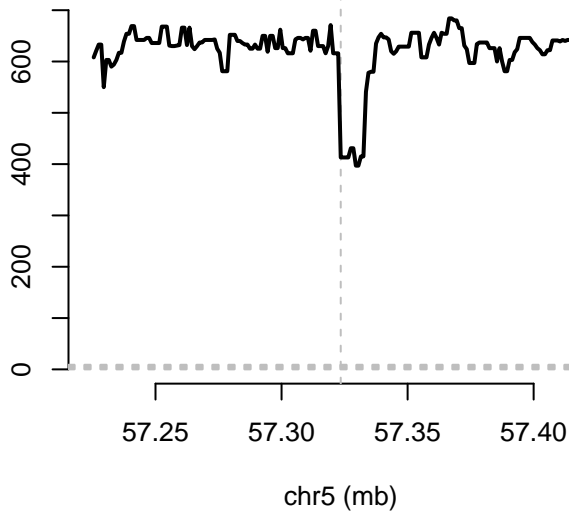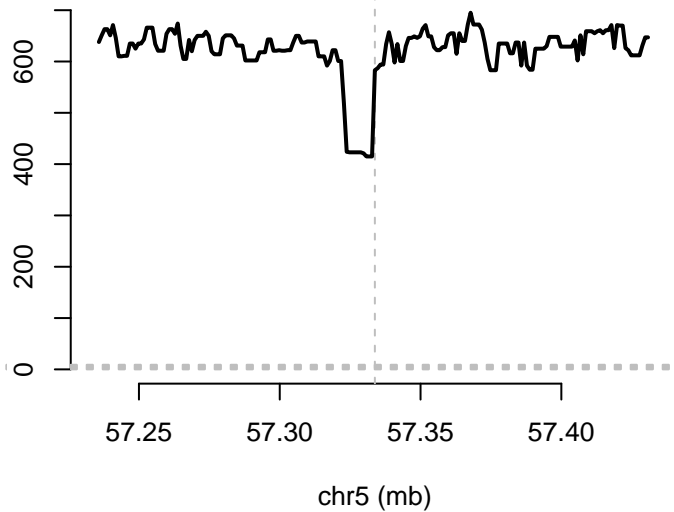

K562 chr5:57,333,778::chr5:57,323,478-+

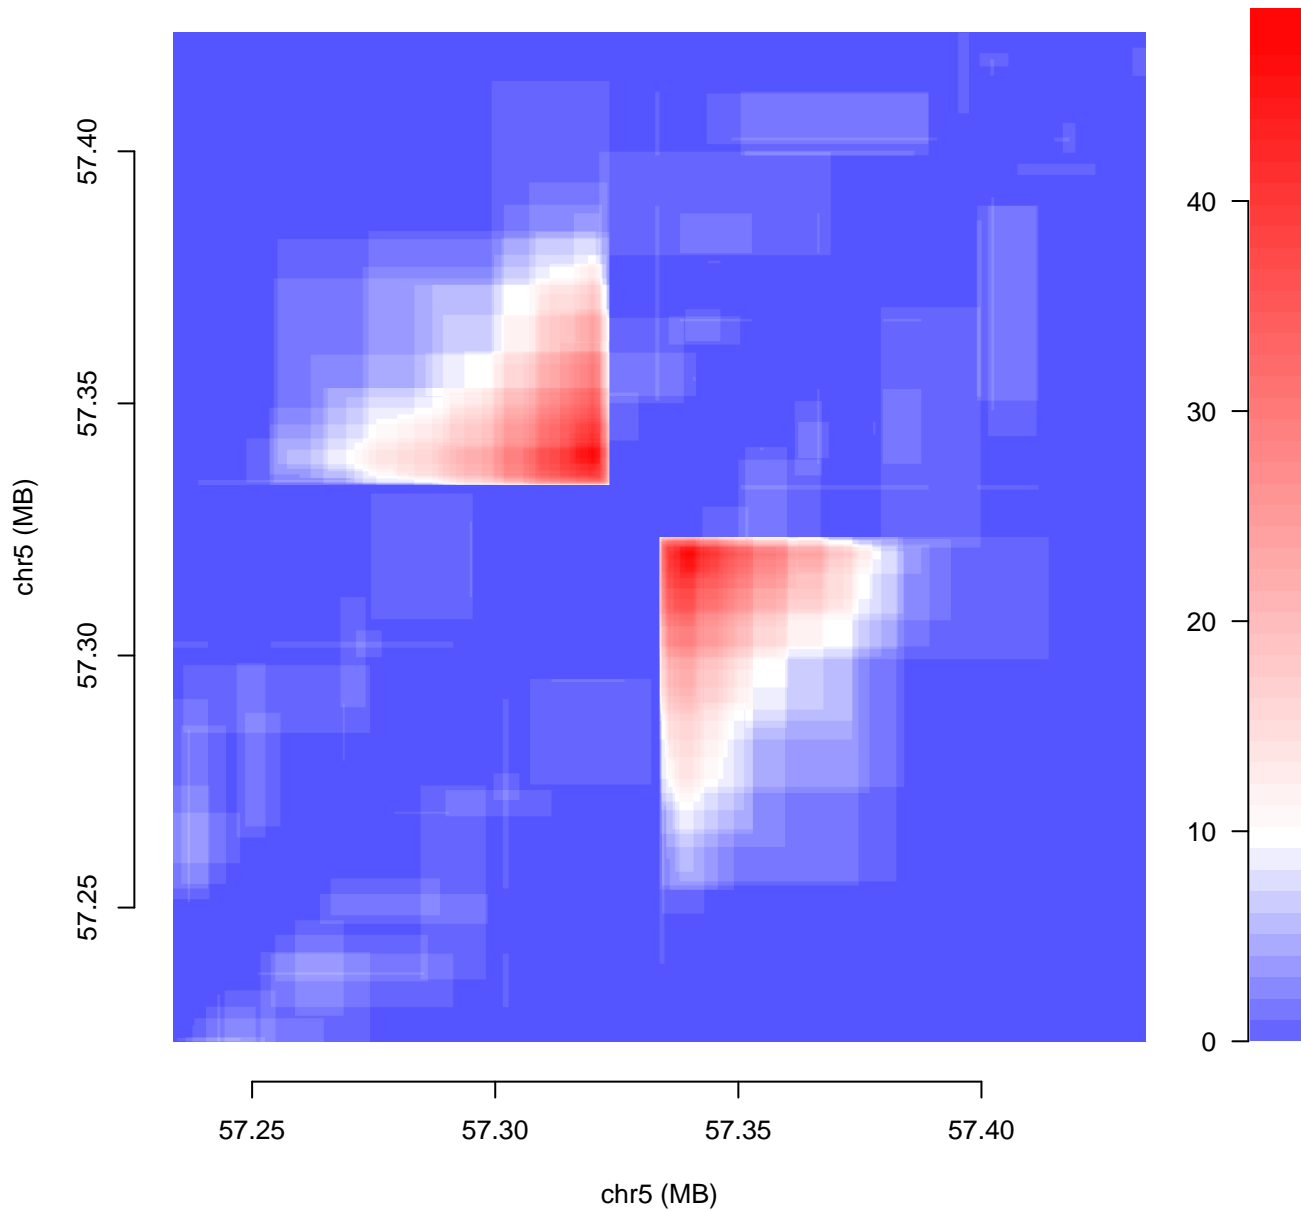

Supplement: Supplemental_Data.zip [file event_317.pdf › event_317.pdf]

Barcode

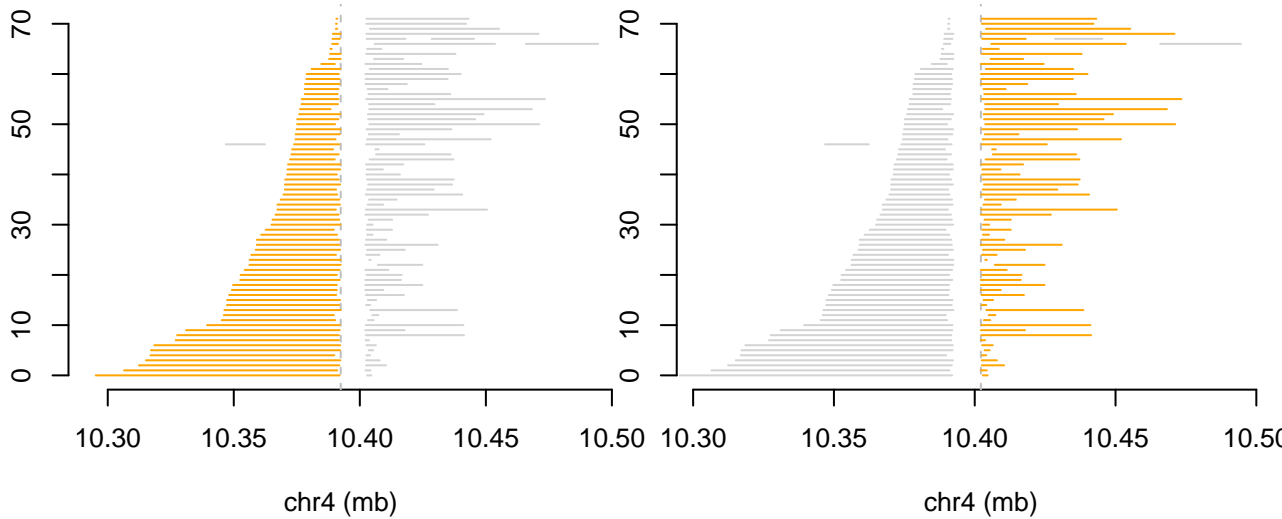

Copy number

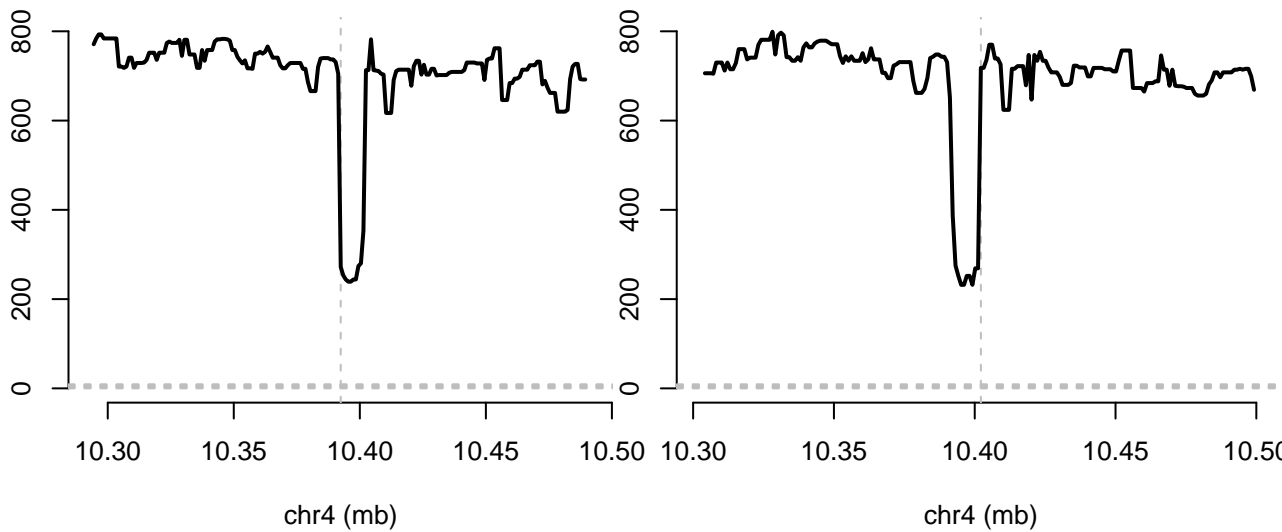

K562 chr4:10,402,181::chr4:10,392,430-+

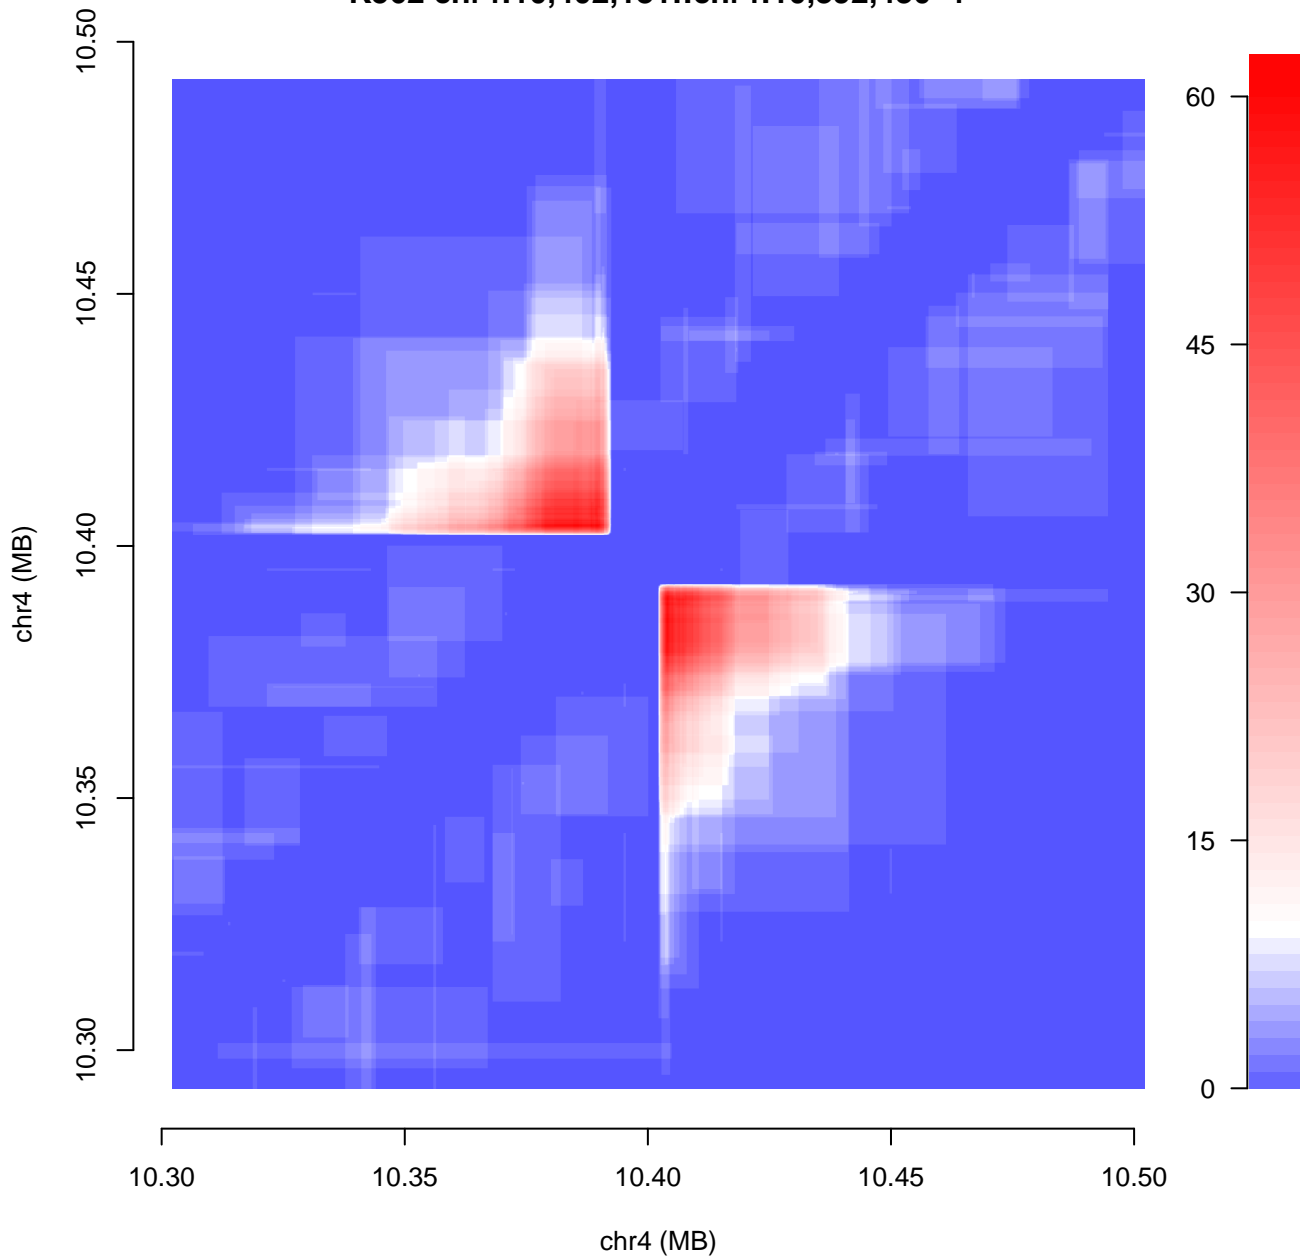

Supplement: Supplemental_Data.zip [file event_318.pdf › event_318.pdf]

Barcode

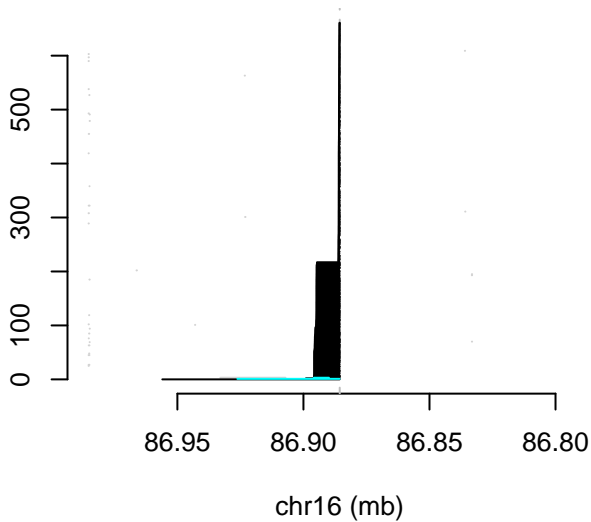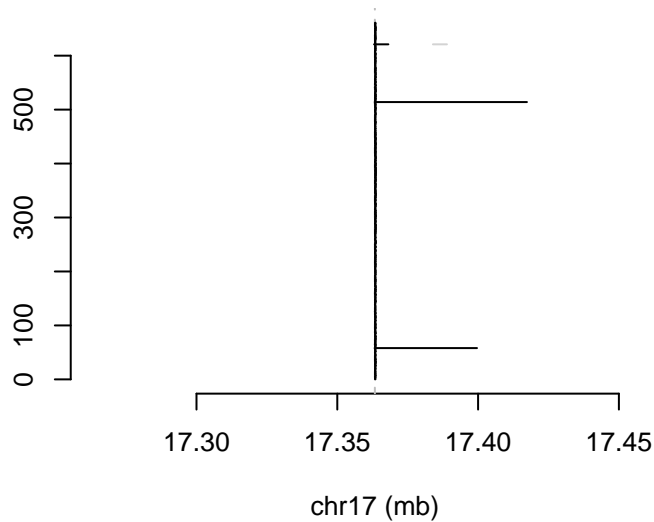

Copy number

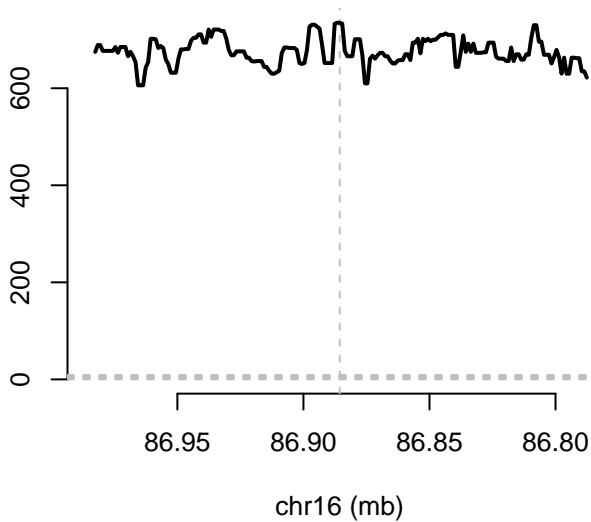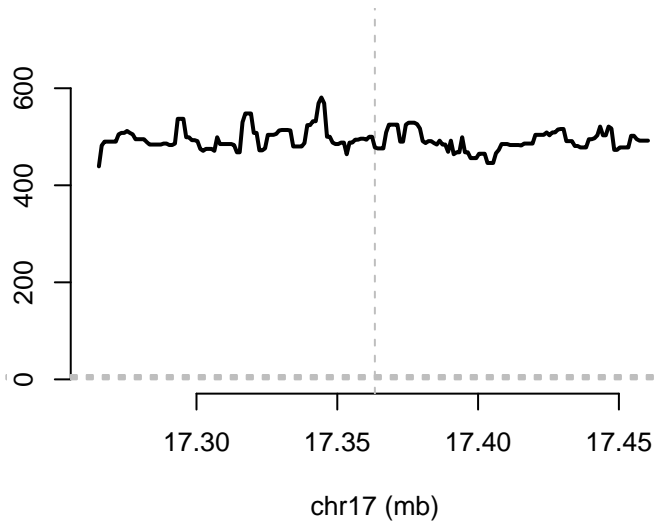

K562 chr17:17,363,346::chr16:86,885,597--

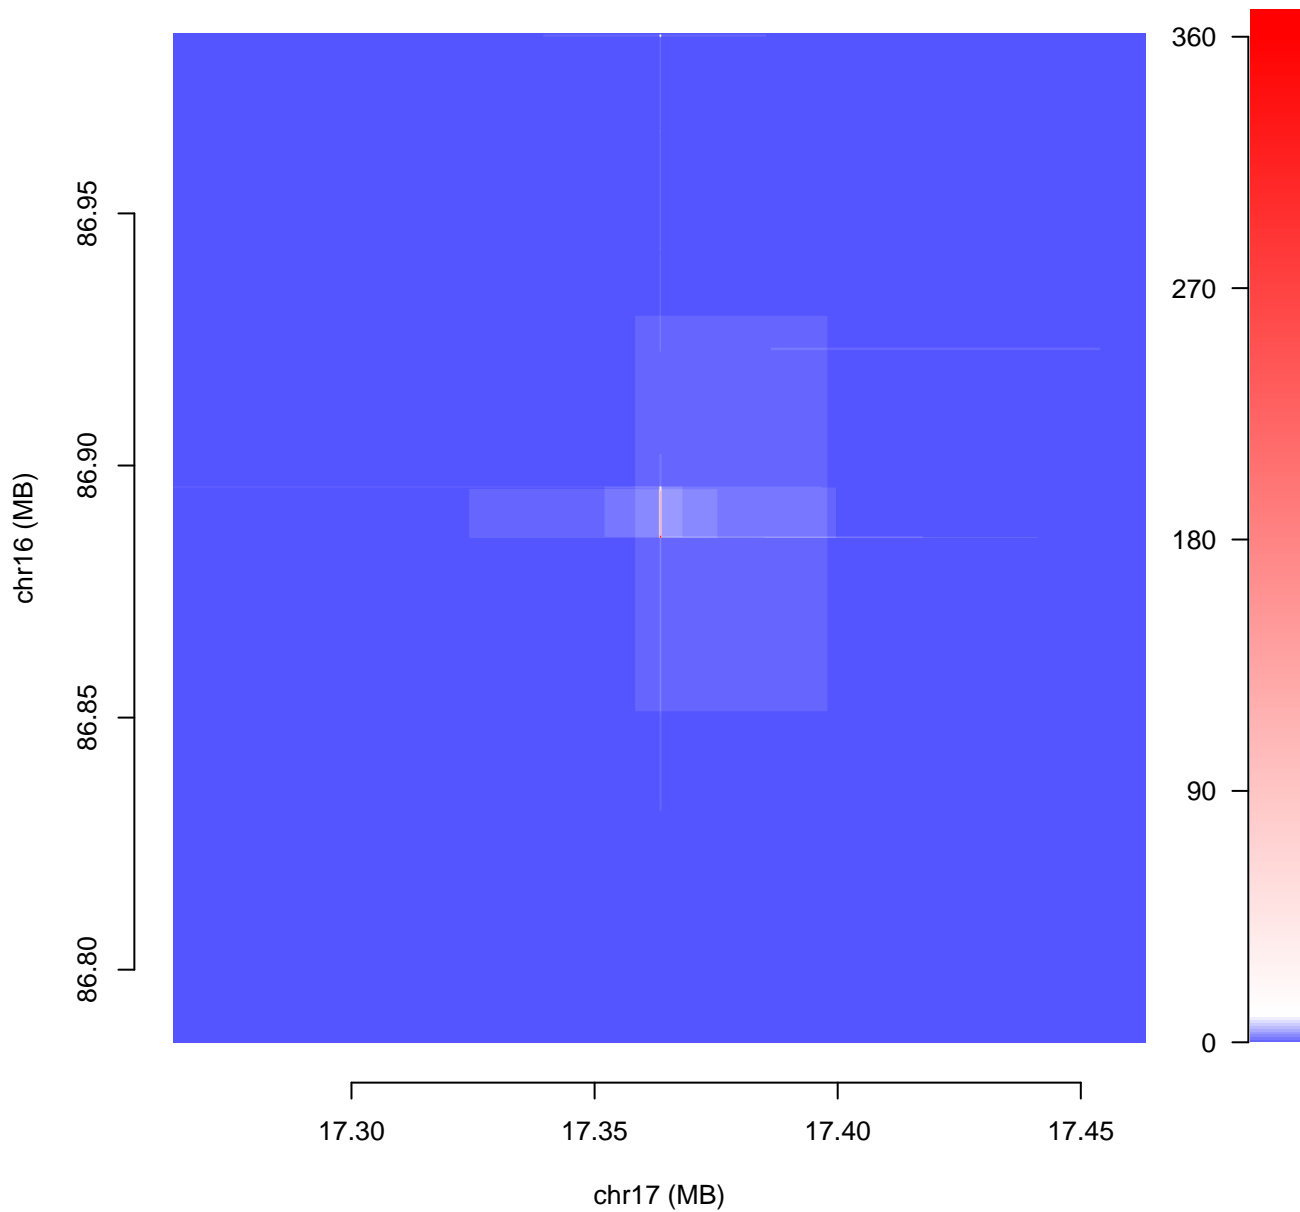

Supplement: Supplemental_Data.zip [file event_319.pdf › event_319.pdf]

Barcode

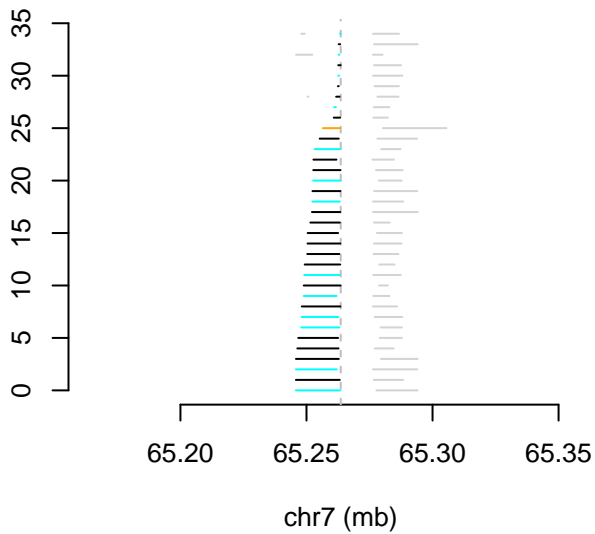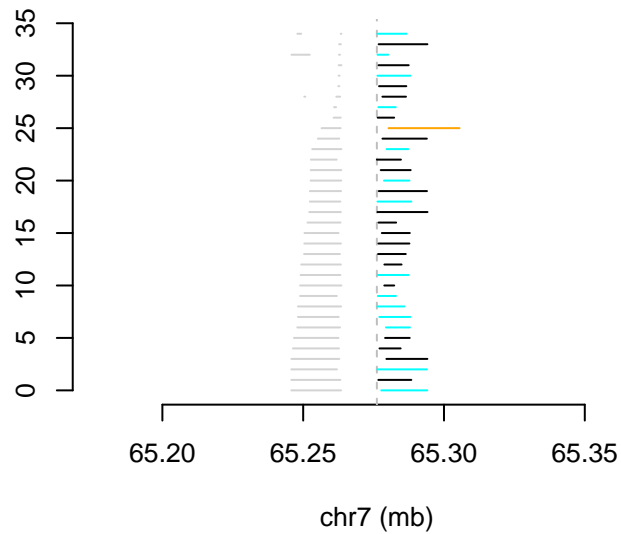

Copy number

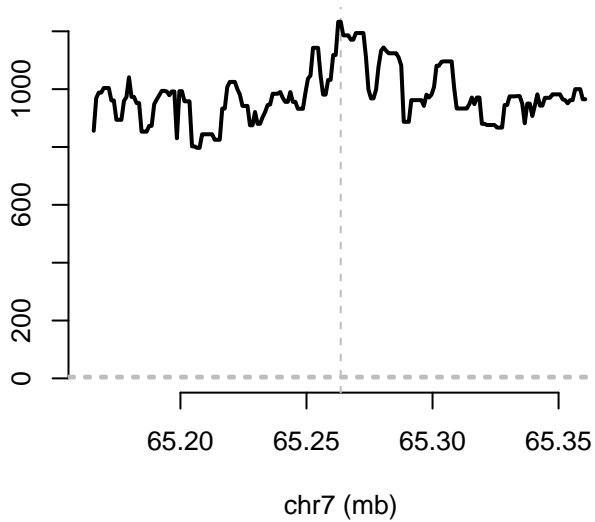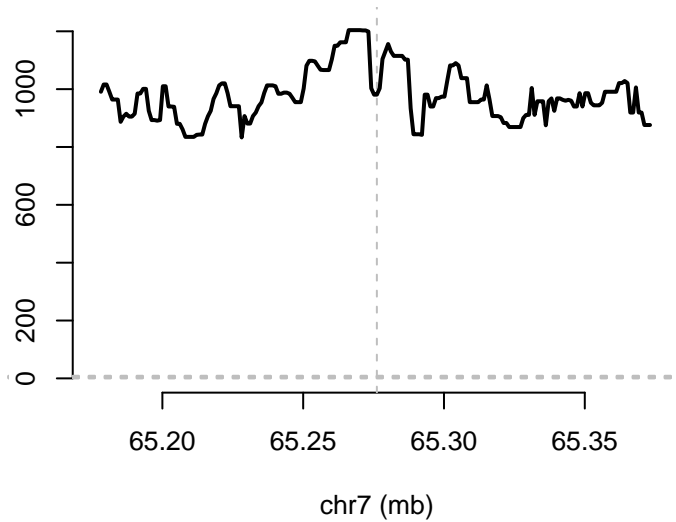

K562 chr7:65,263,588::chr7:65,276,169+-

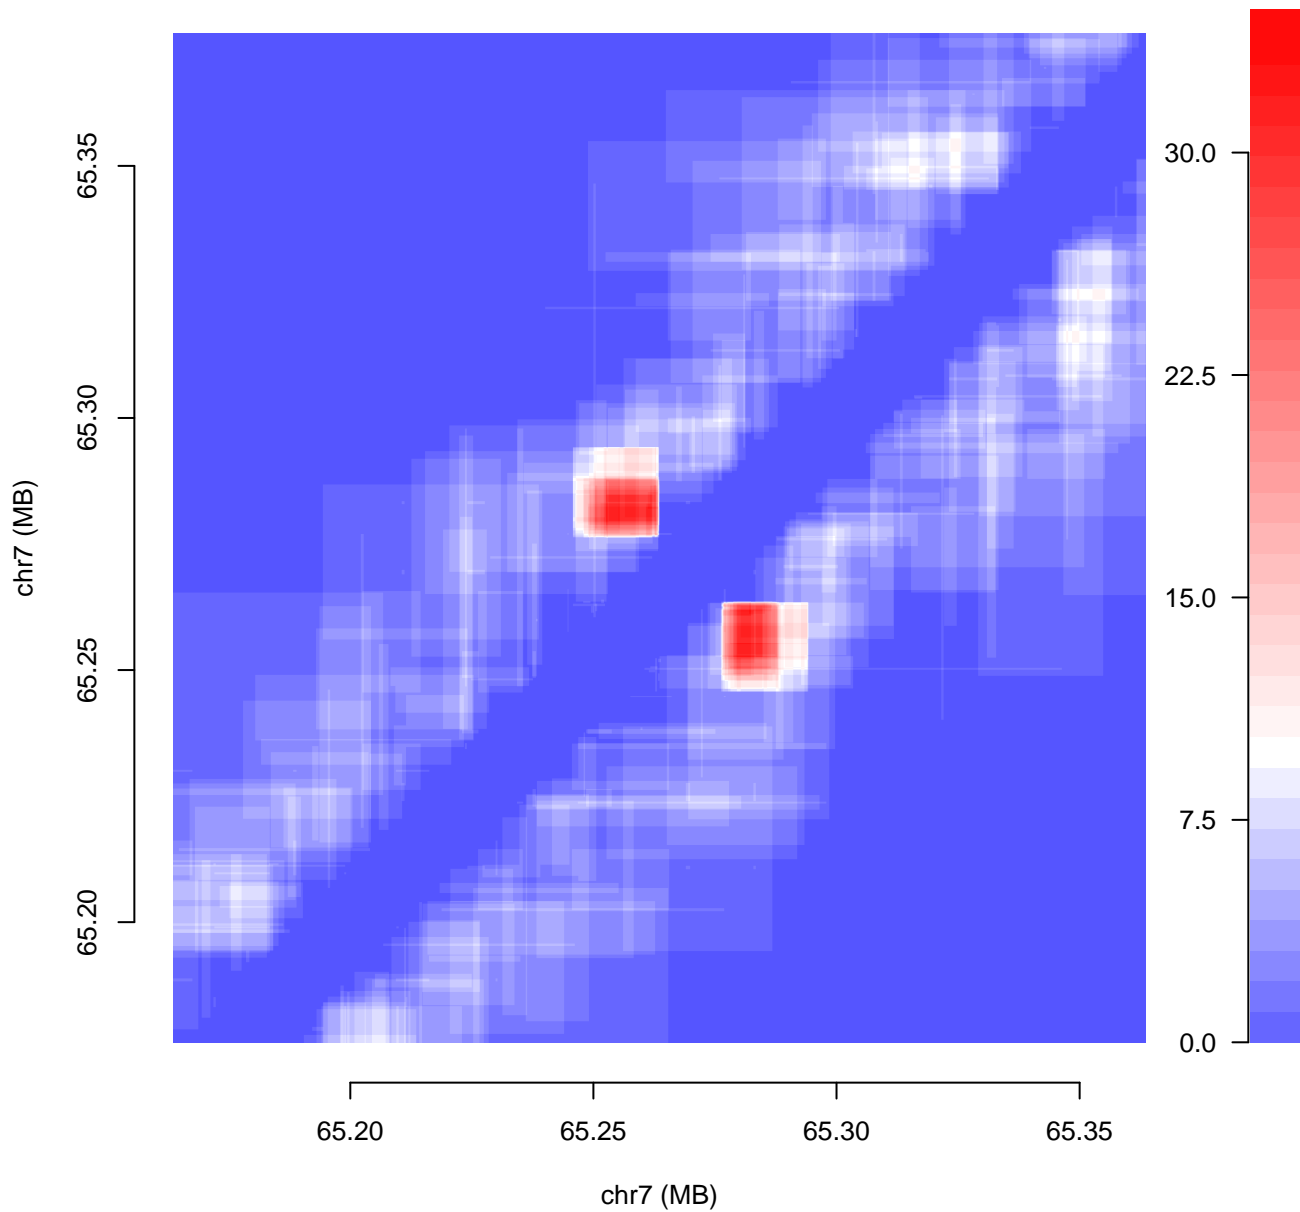

Supplement: Supplemental_Data.zip [file event_32.pdf › event_32.pdf]

Barcode

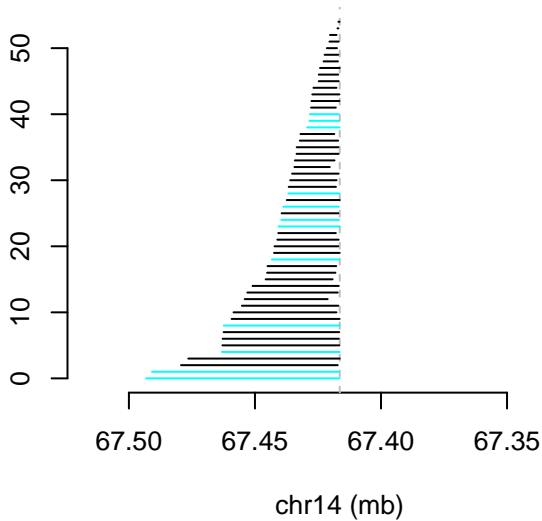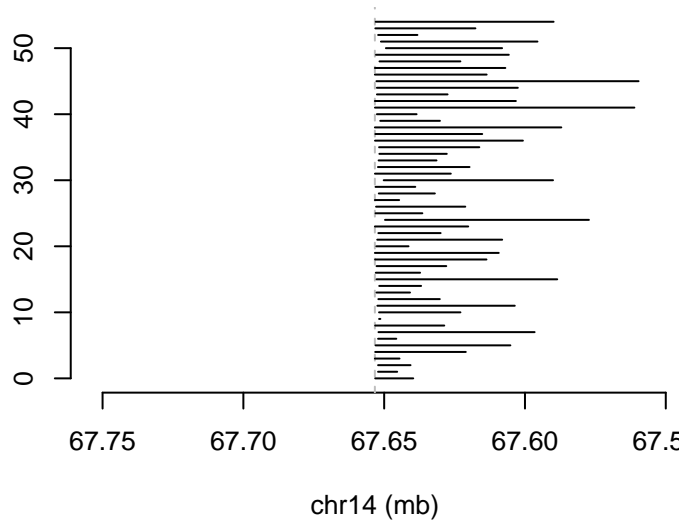

Copy number

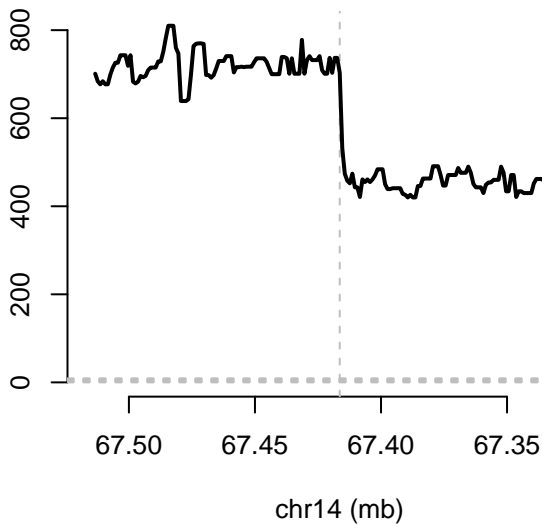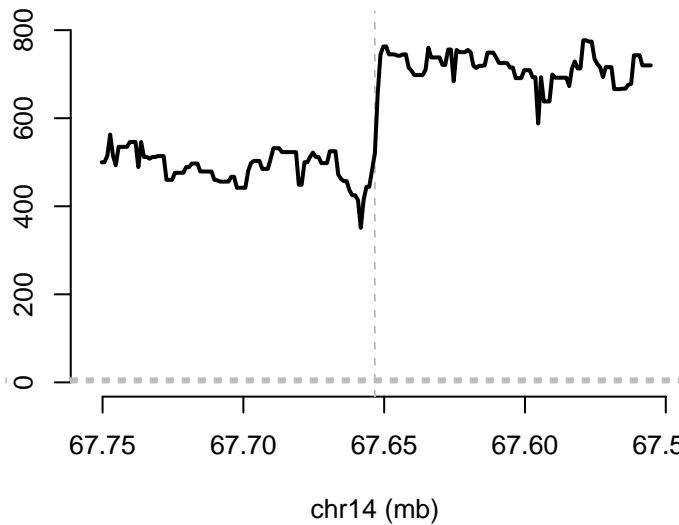

K562 chr14:67,416,369::chr14:67,653,306-+

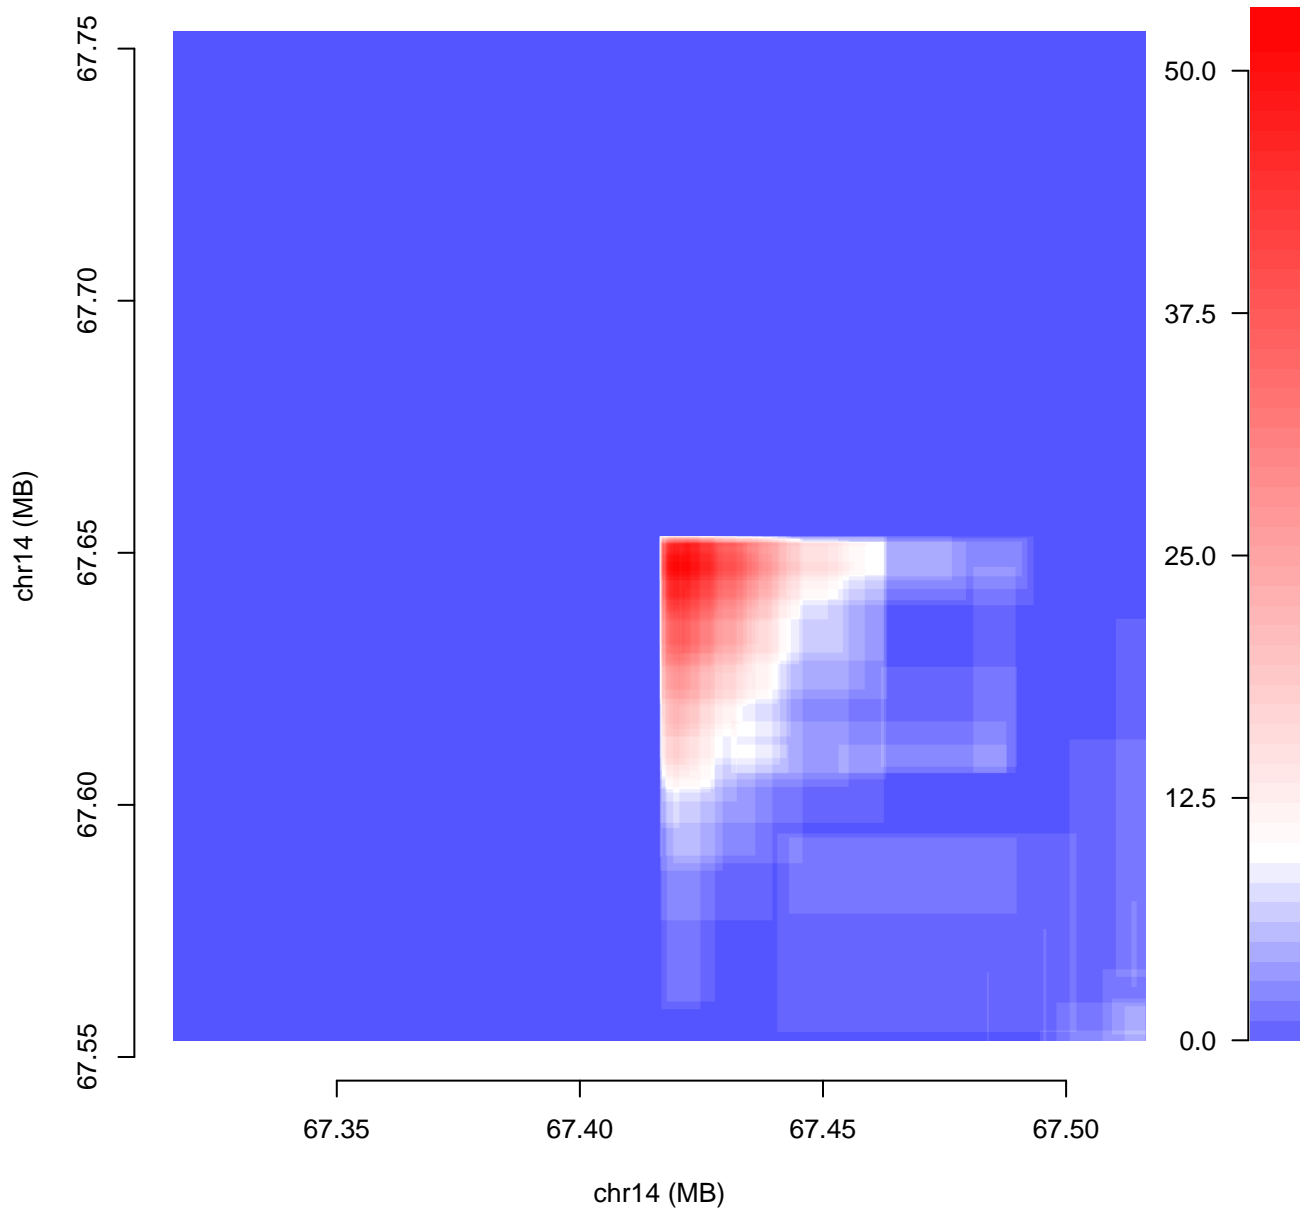

Supplement: Supplemental_Data.zip [file event_320.pdf › event_320.pdf]

Barcode

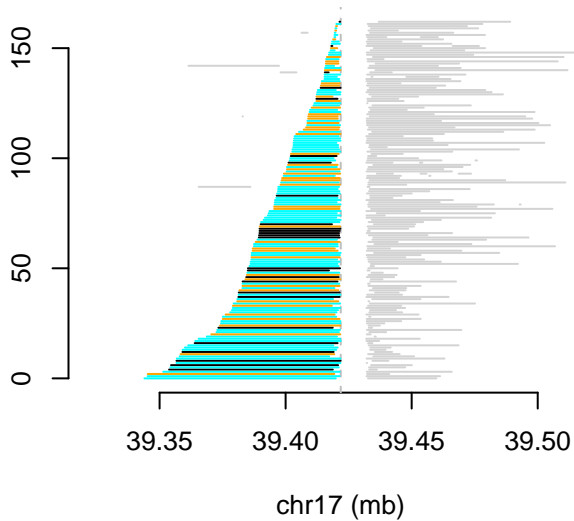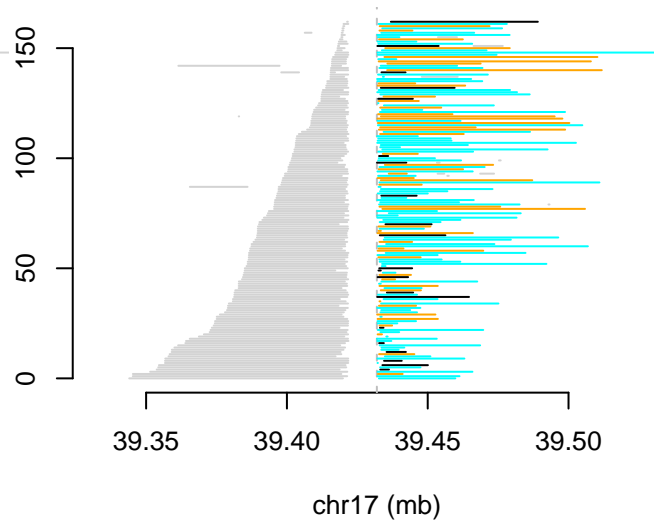

Copy number

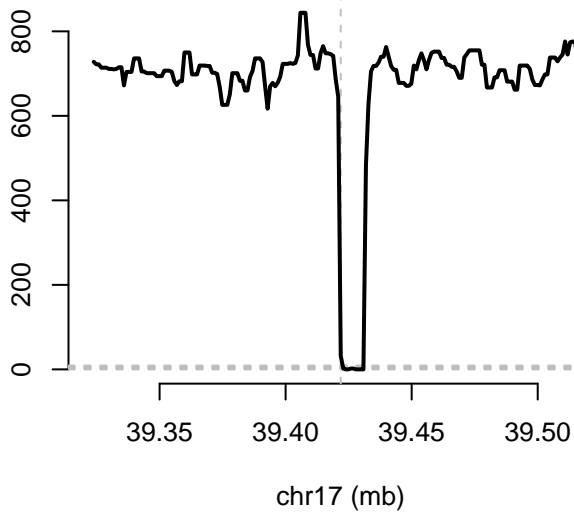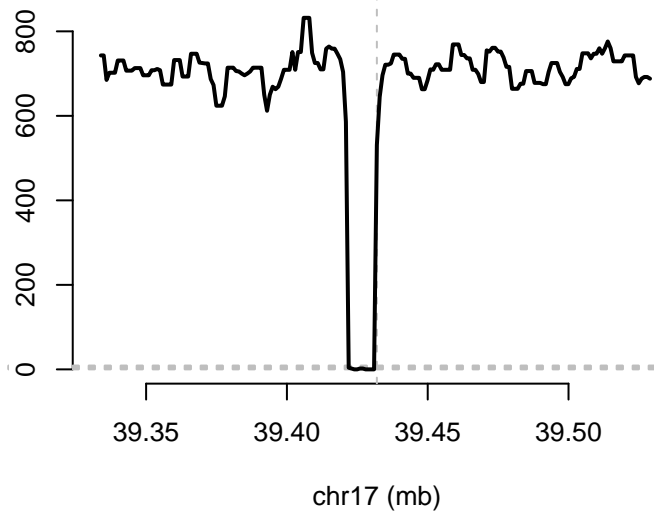

K562 chr17:39,421,867::chr17:39,431,941+-

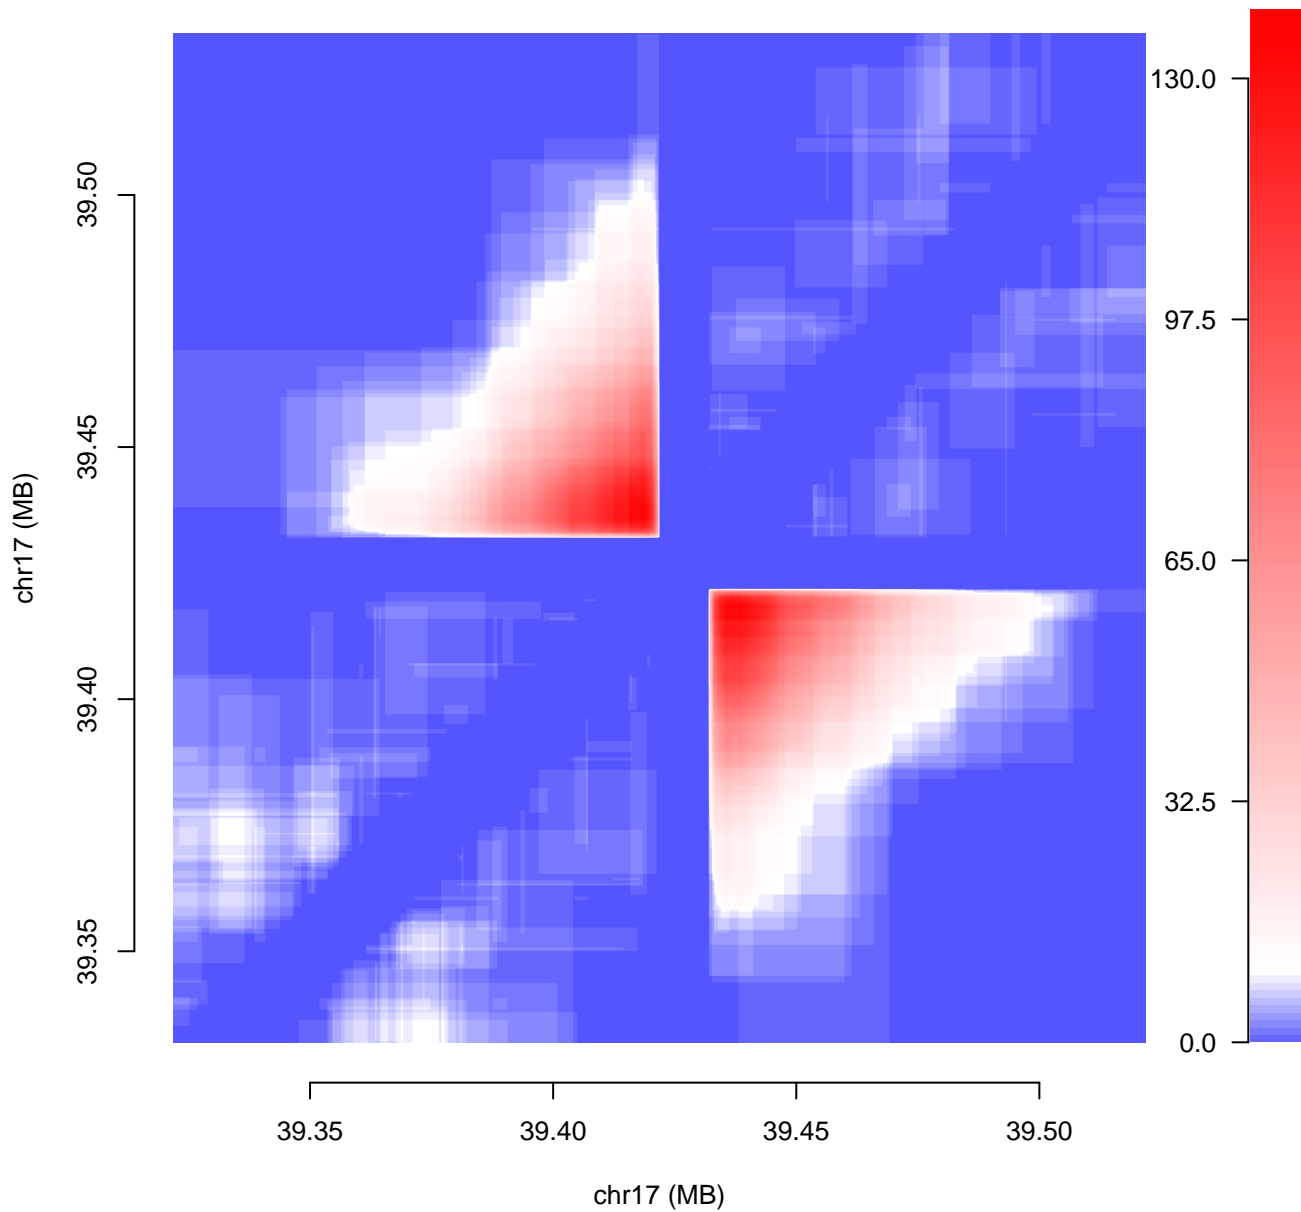

Supplement: Supplemental_Data.zip [file event_321.pdf › event_321.pdf]

Barcode

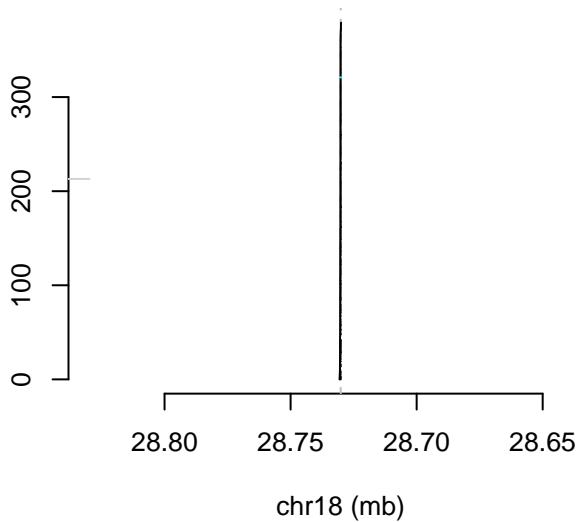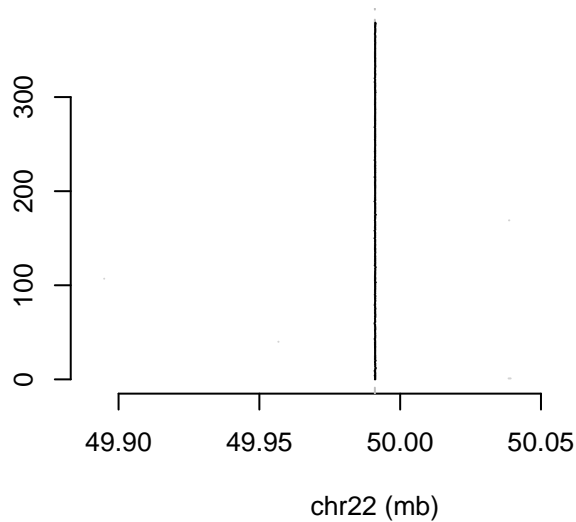

Copy number

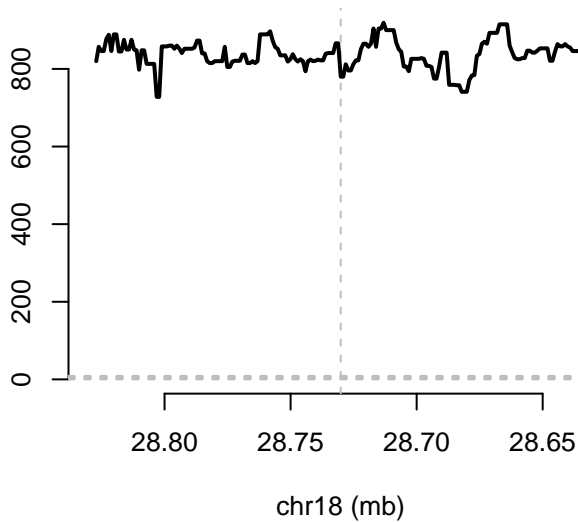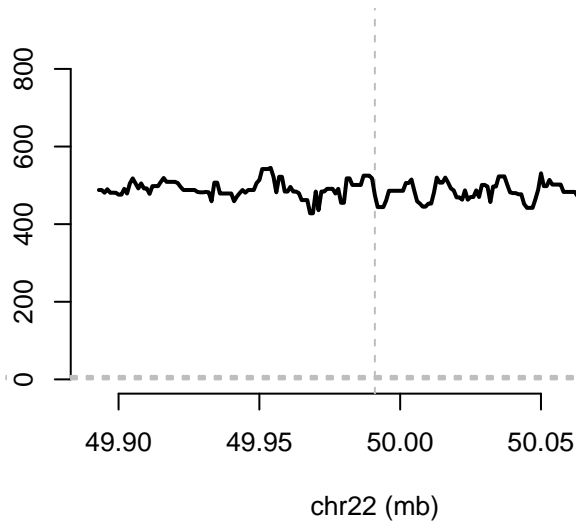

K562 chr22:49,991,011::chr18:28,730,110--

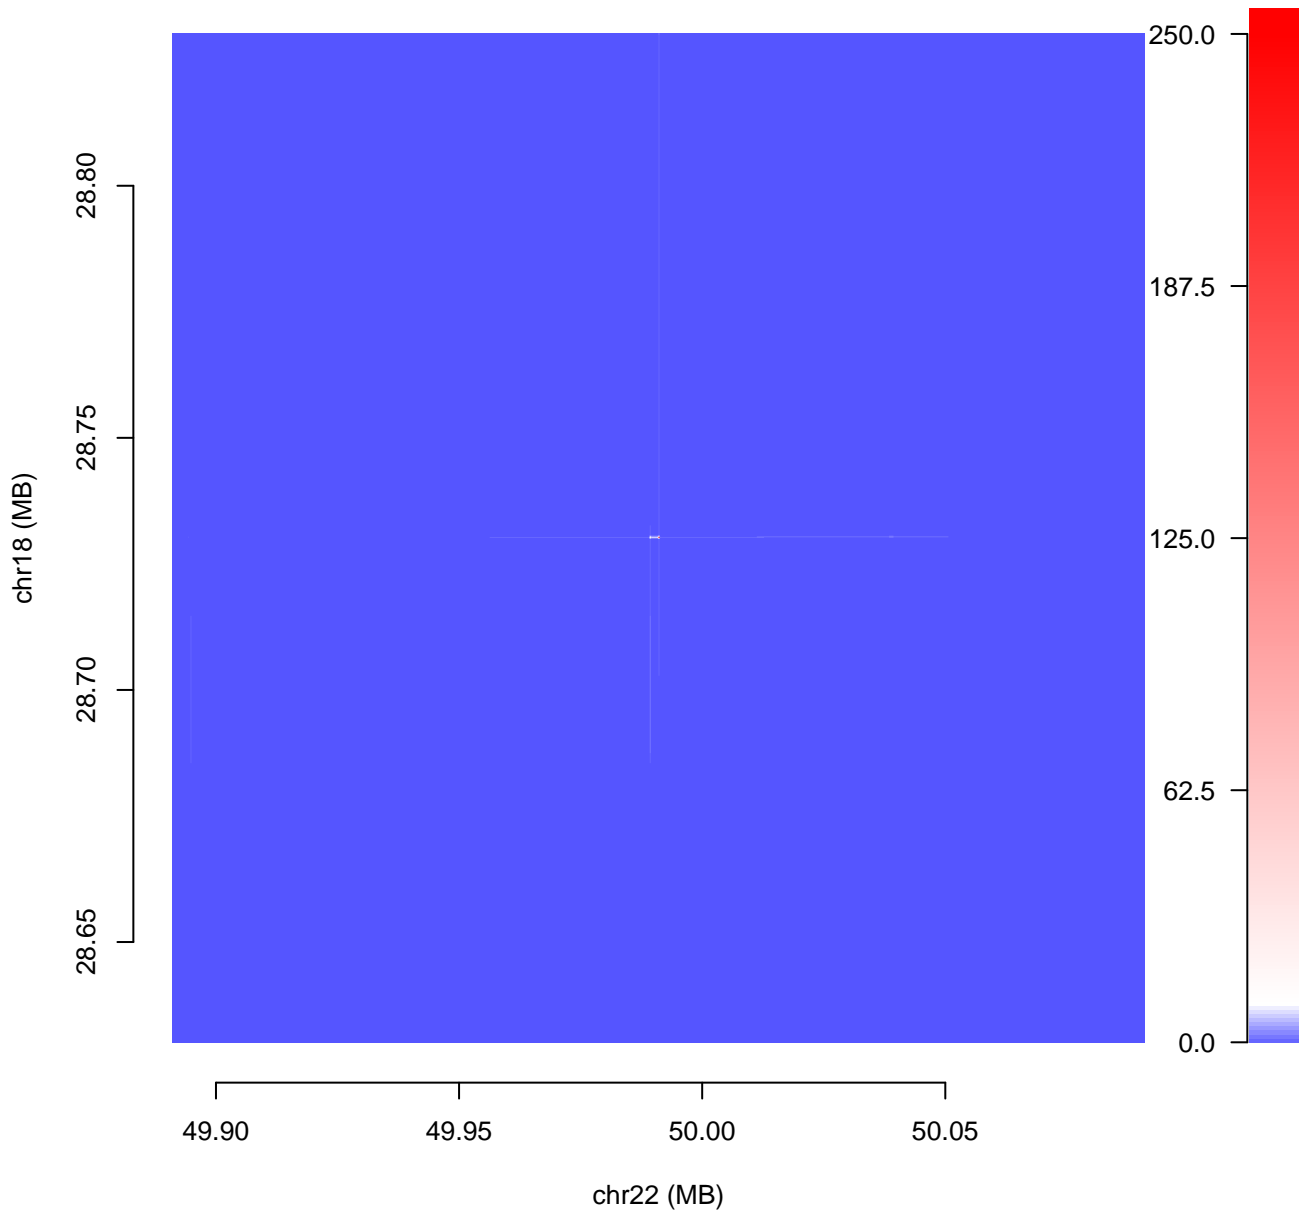

Supplement: Supplemental_Data.zip [file event_322.pdf › event_322.pdf]

Barcode

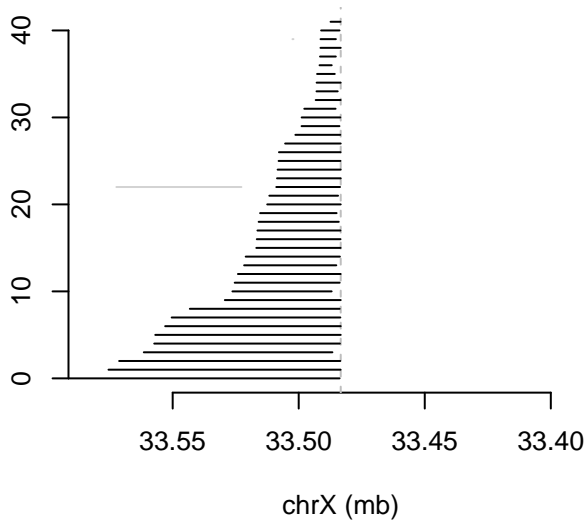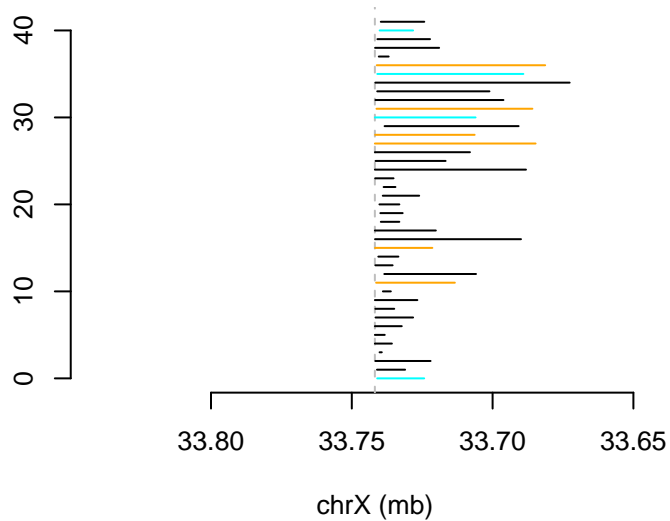

Copy number

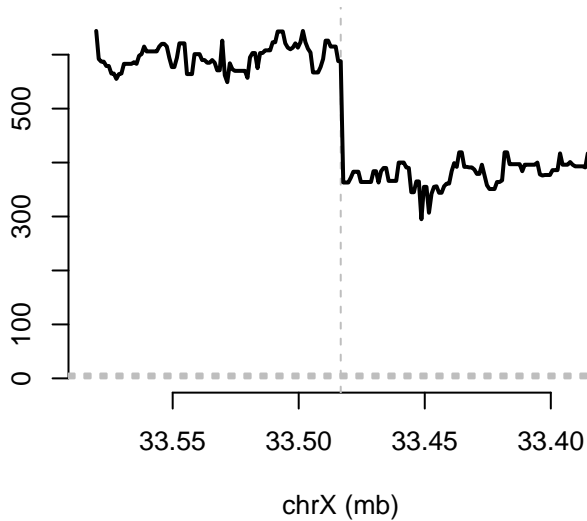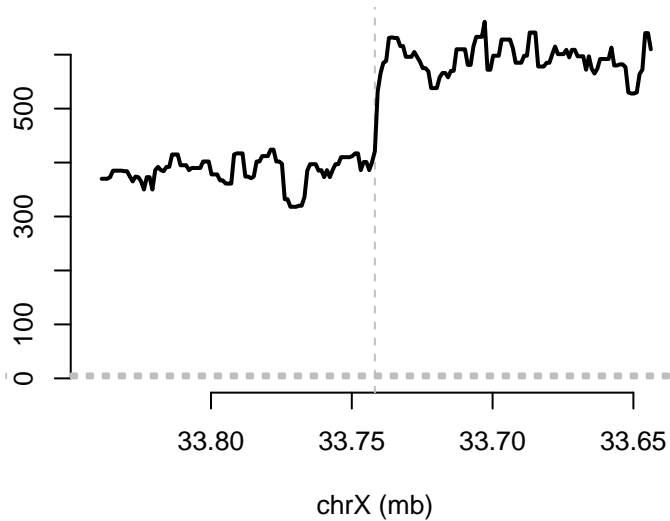

K562 chrX:33,741,806::chrX:33,483,329+-

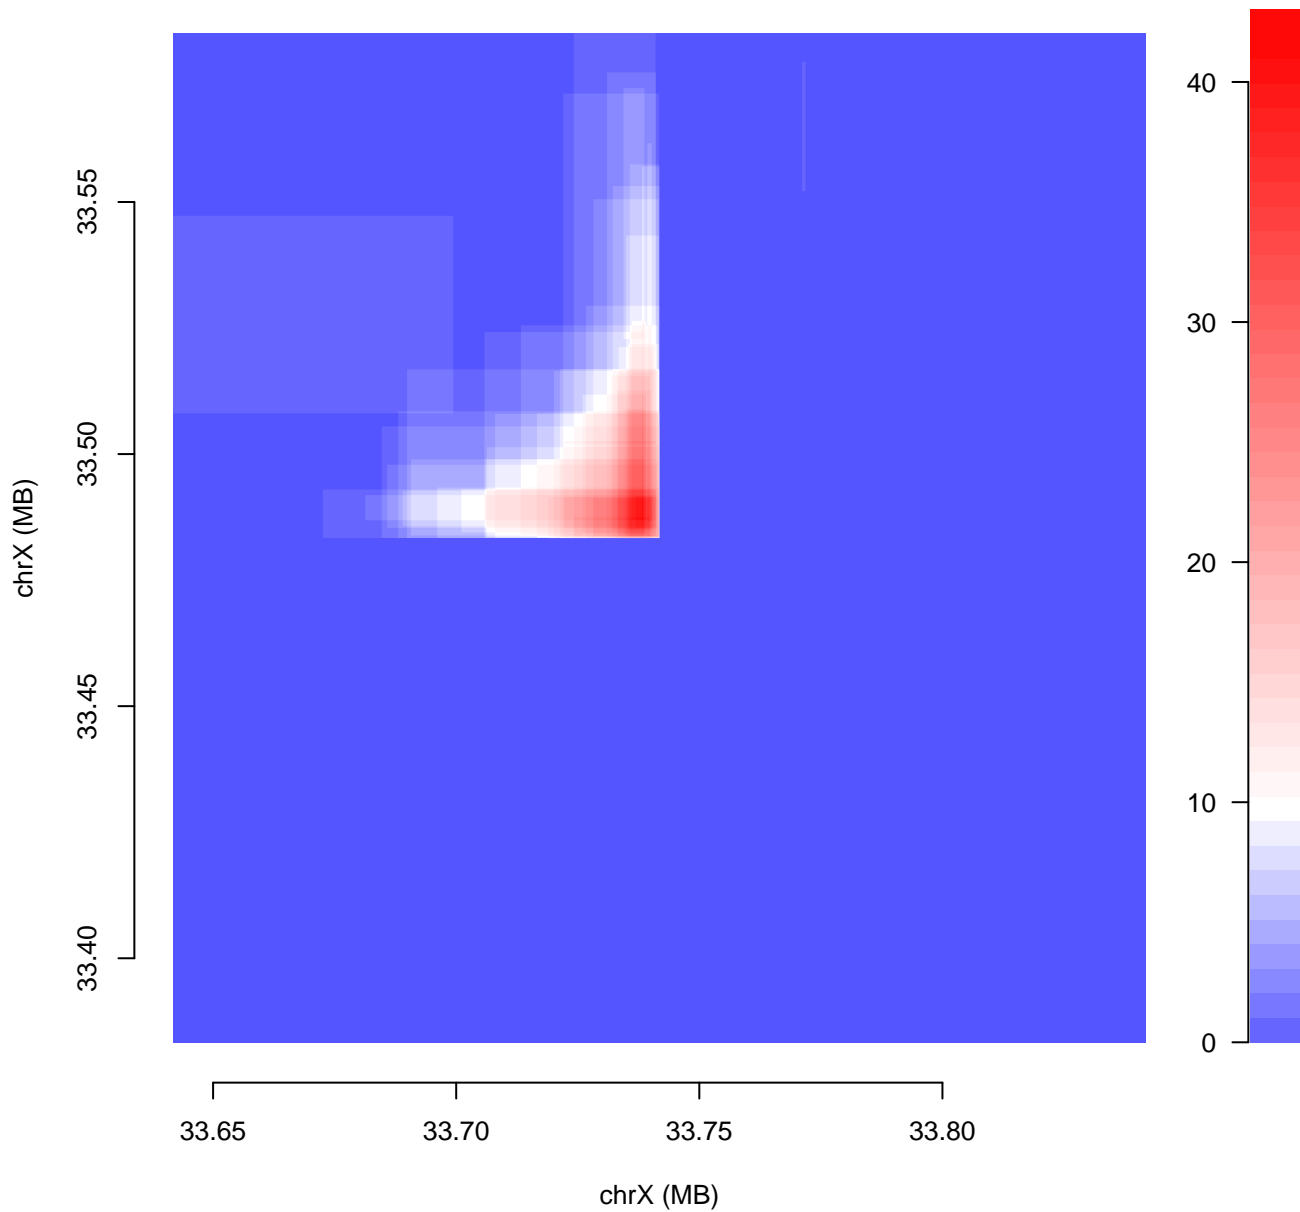

Supplement: Supplemental_Data.zip [file event_323.pdf › event_323.pdf]

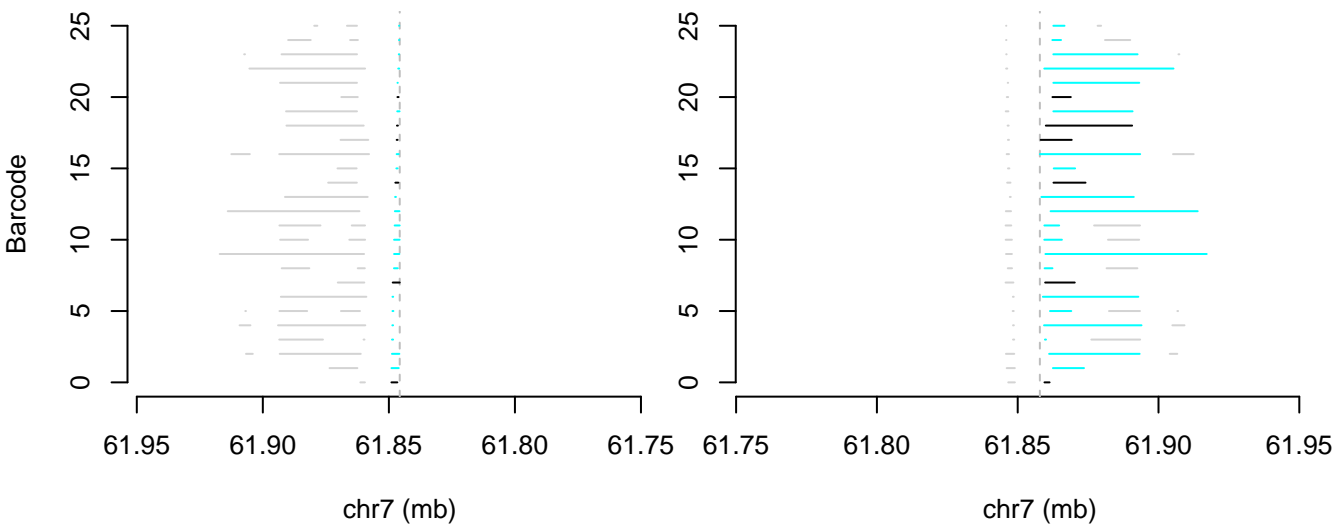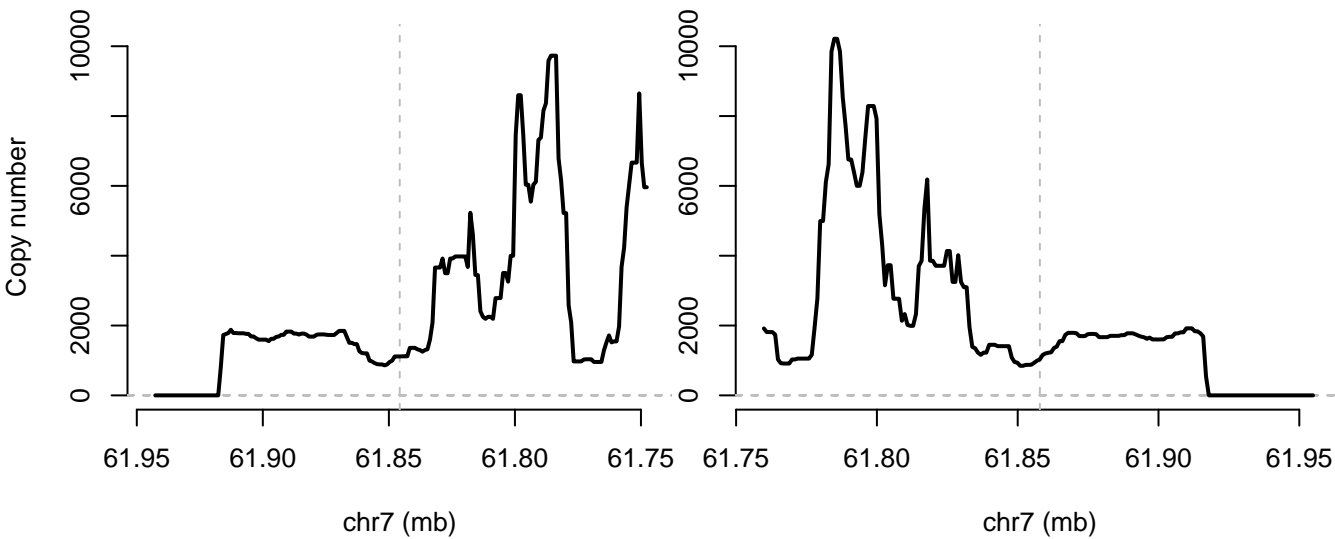

K562 chr7:61,857,871::chr7:61,845,691--

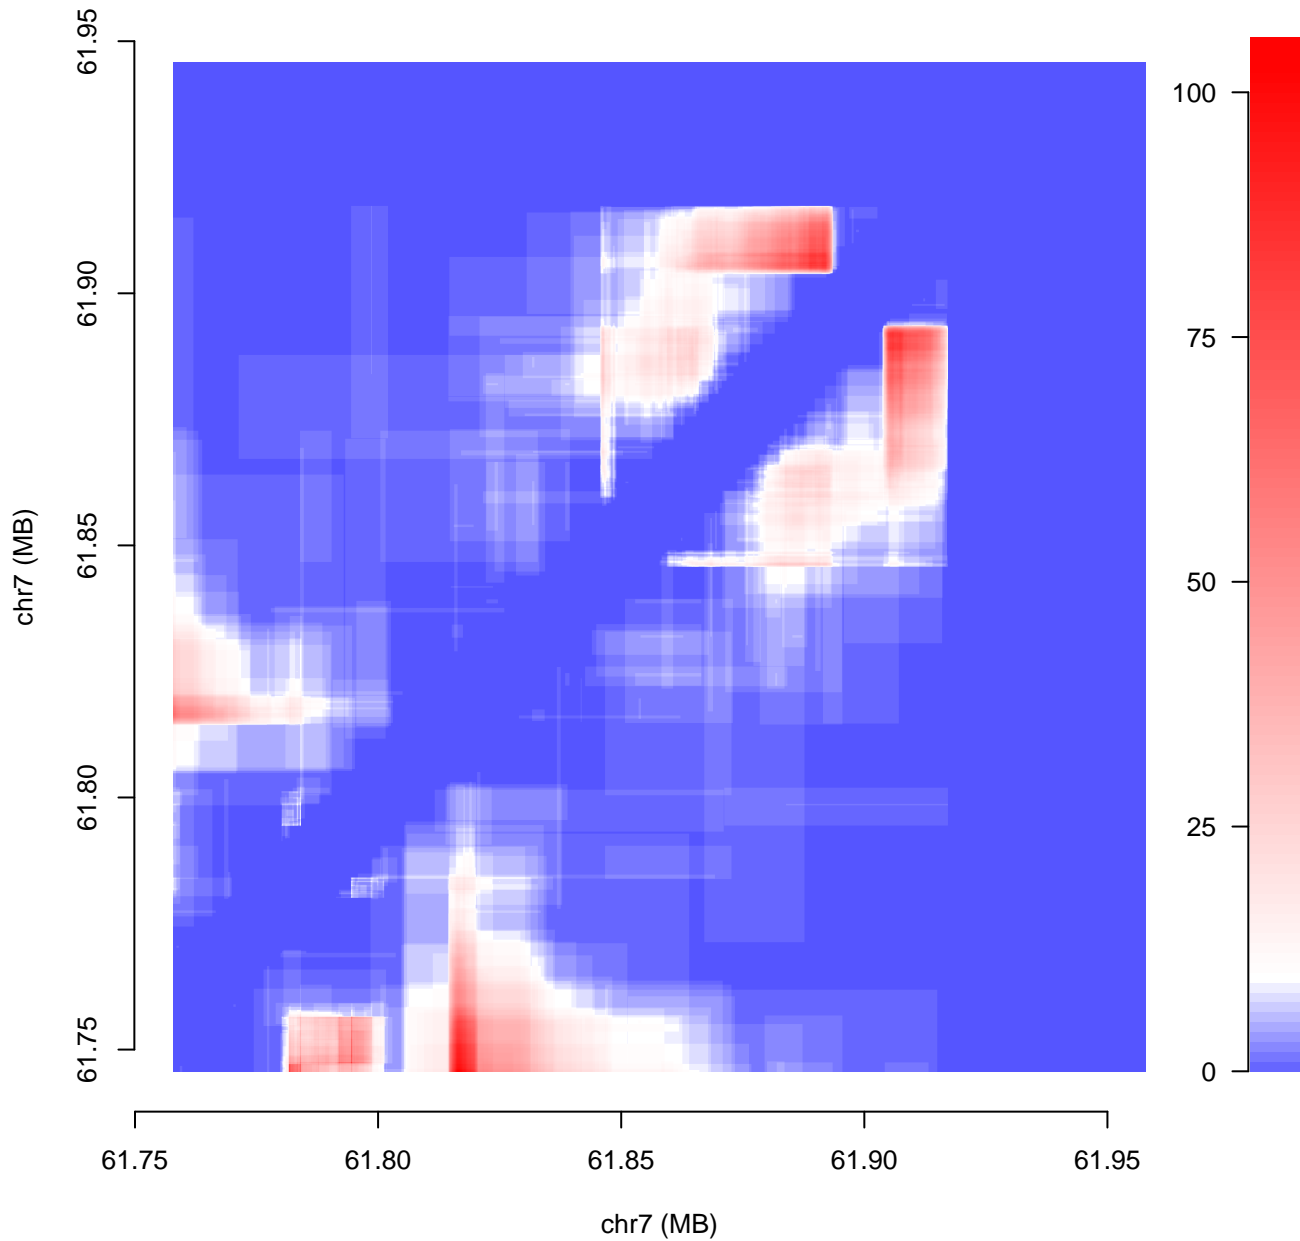

Supplement: Supplemental_Data.zip [file event_324.pdf › event_324.pdf]

Barcode

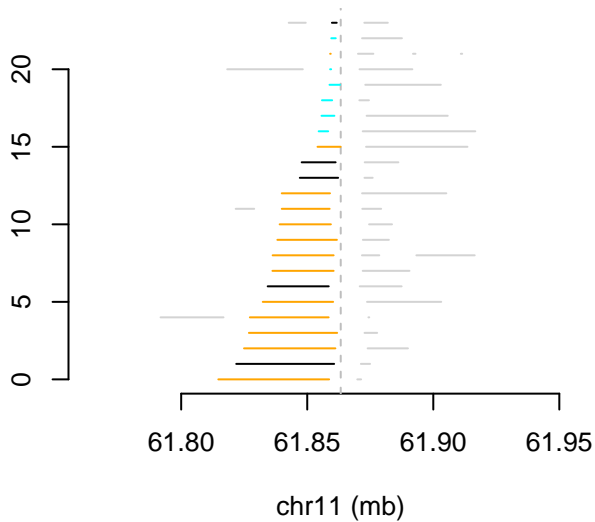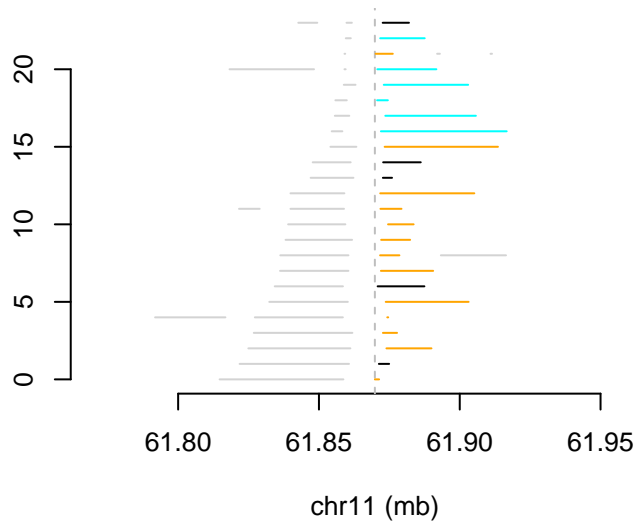

Copy number

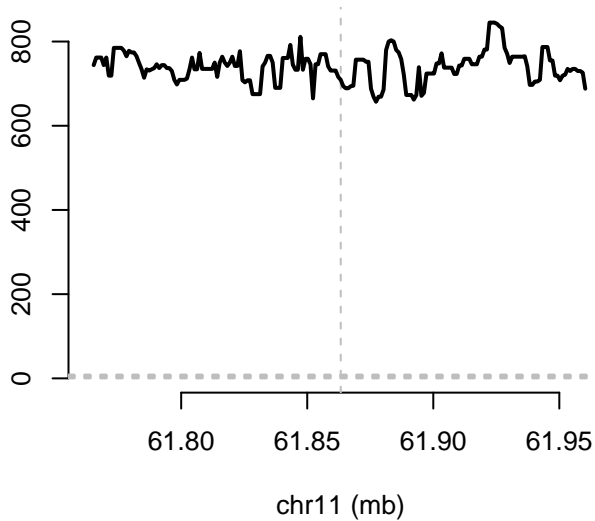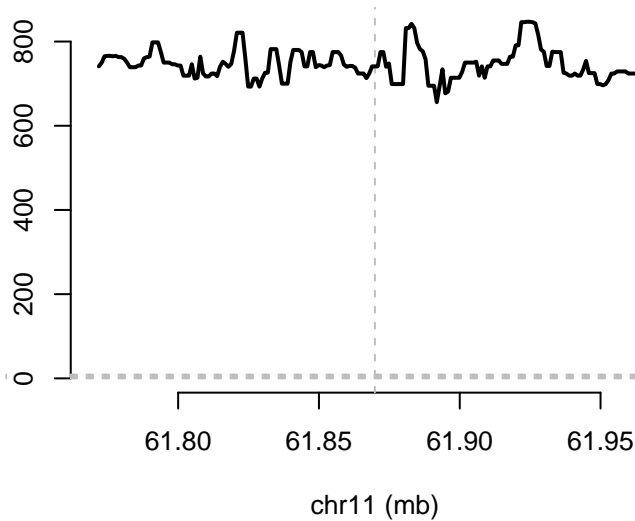

K562 chr11:61,863,291::chr11:61,869,860+-

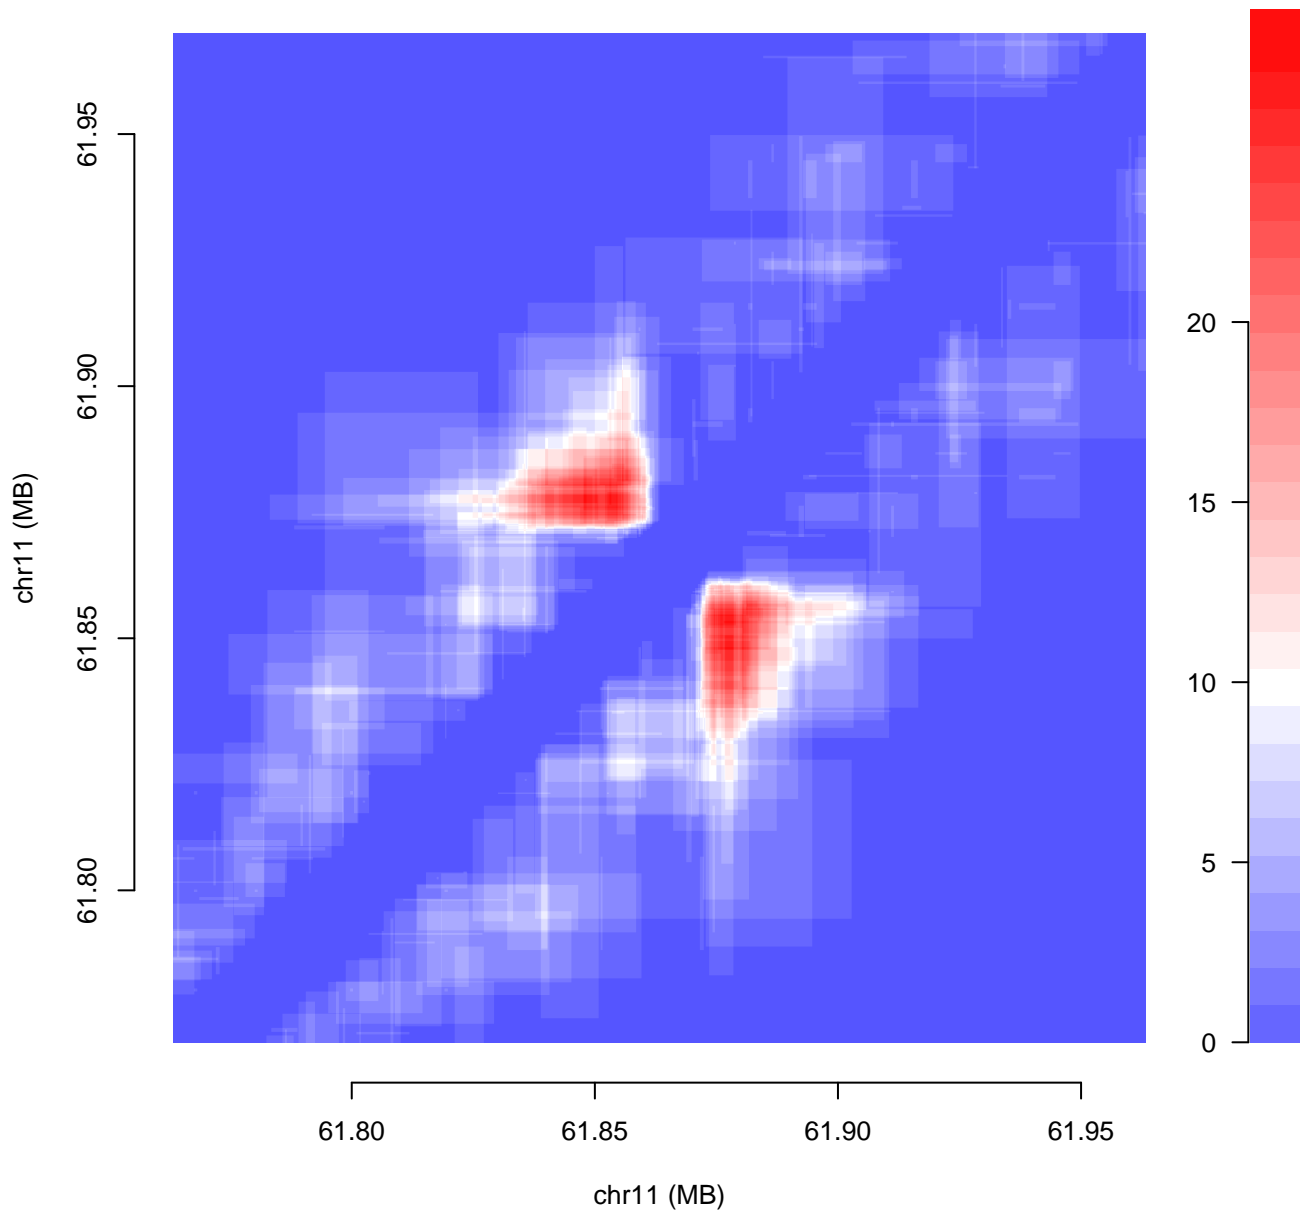

Supplement: Supplemental_Data.zip [file event_325.pdf › event_325.pdf]

Barcode

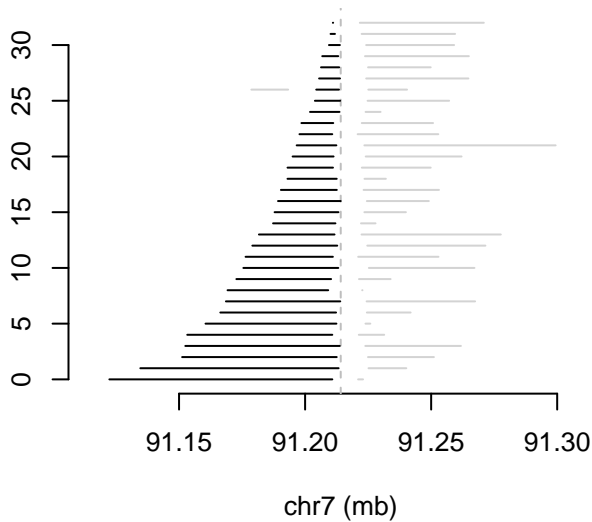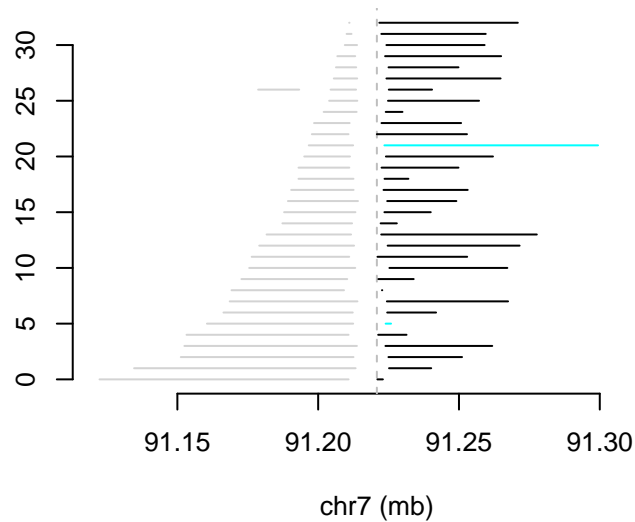

Copy number

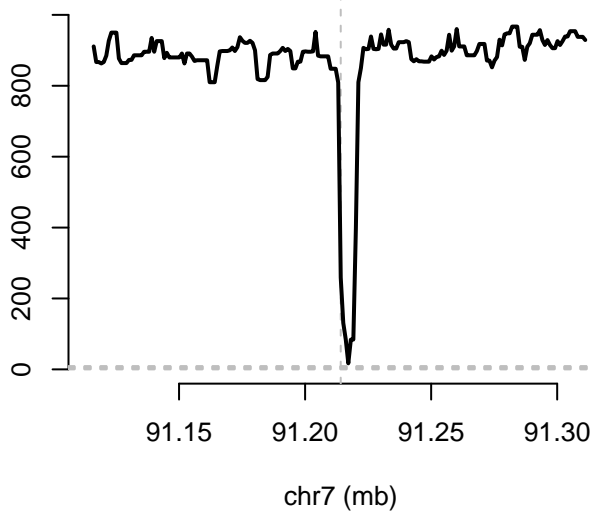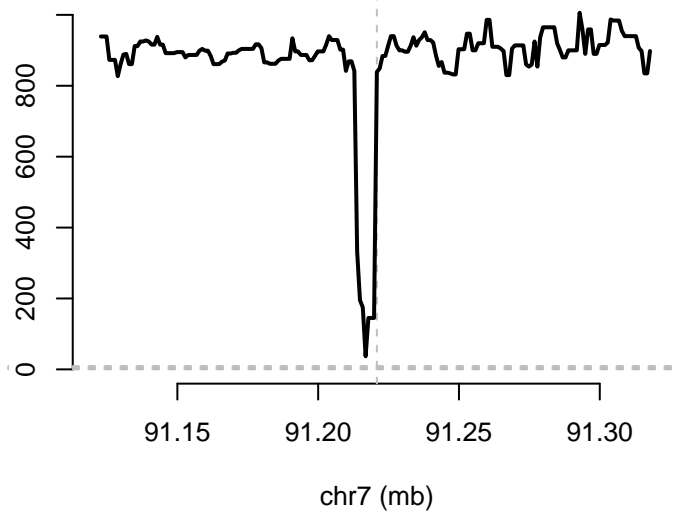

K562 chr7:91,214,137::chr7:91,220,841+-

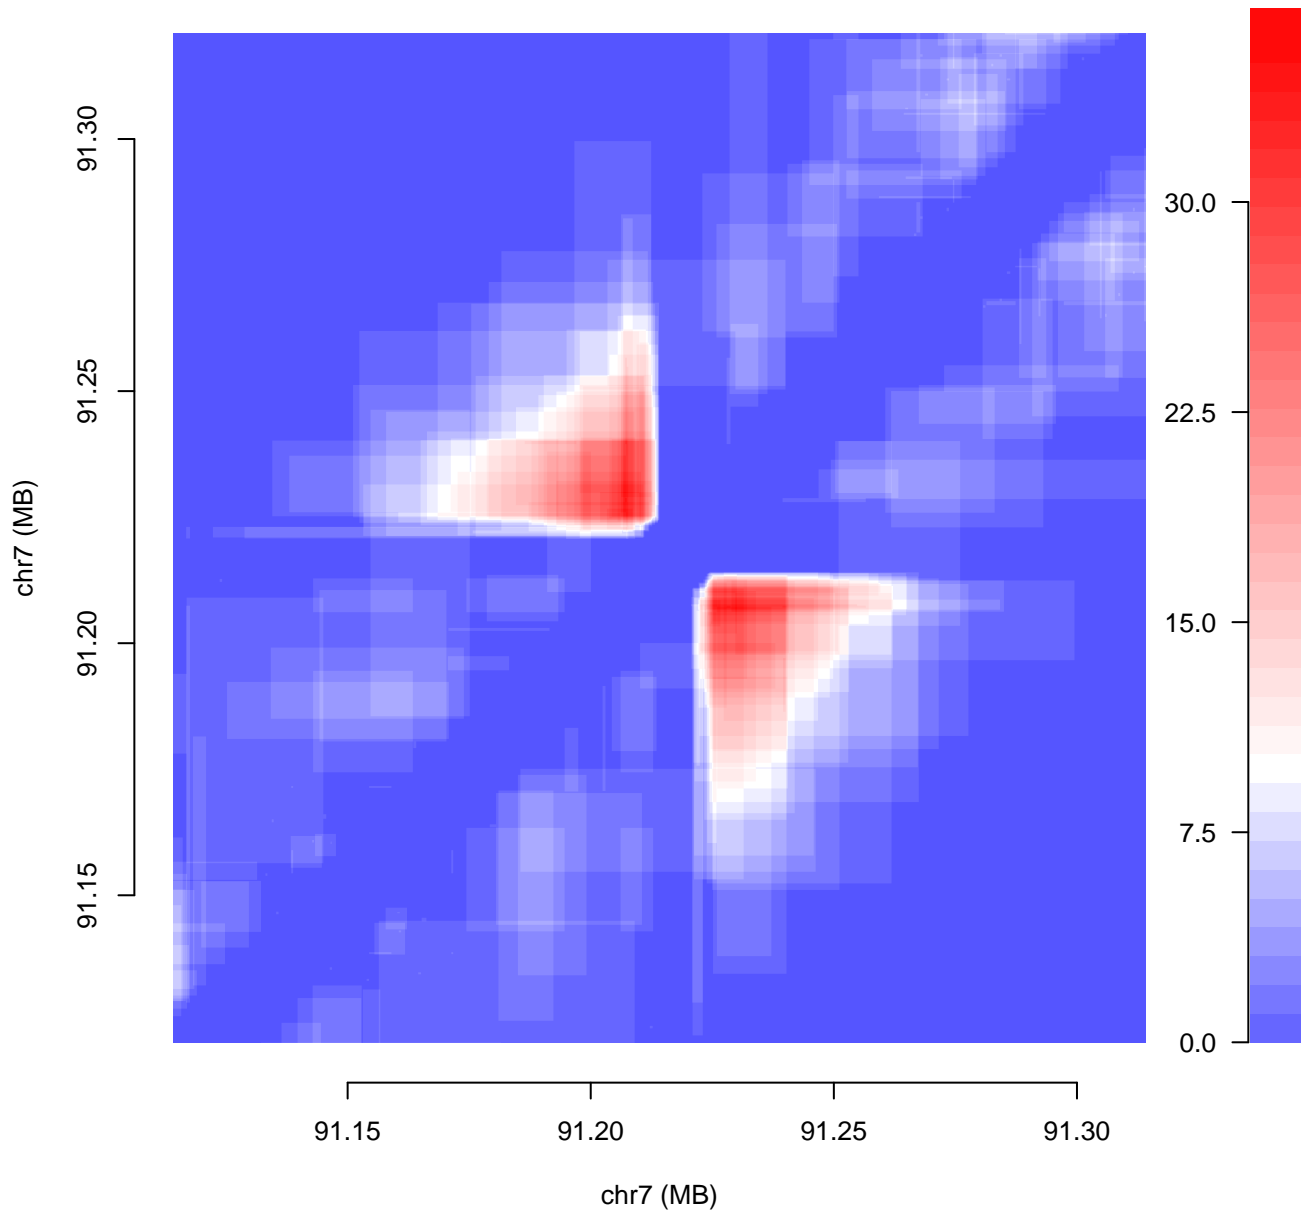

Supplement: Supplemental_Data.zip [file event_326.pdf › event_326.pdf]

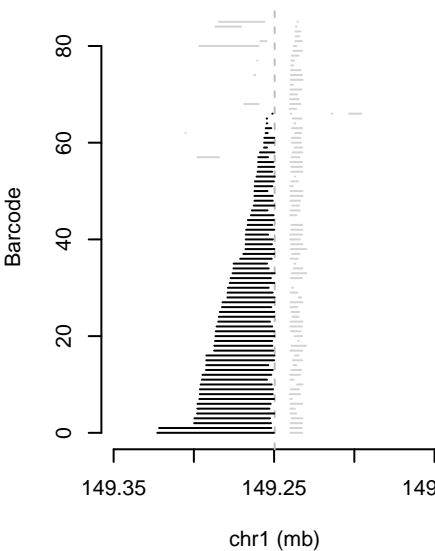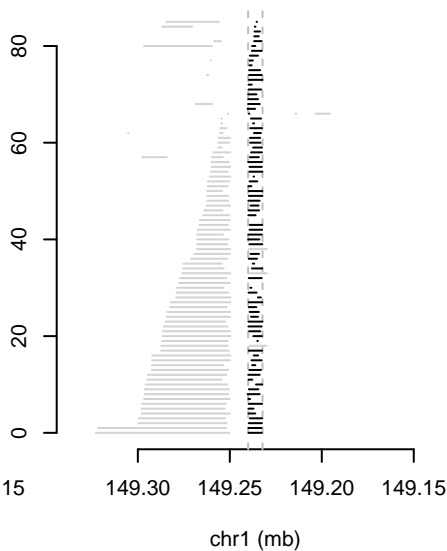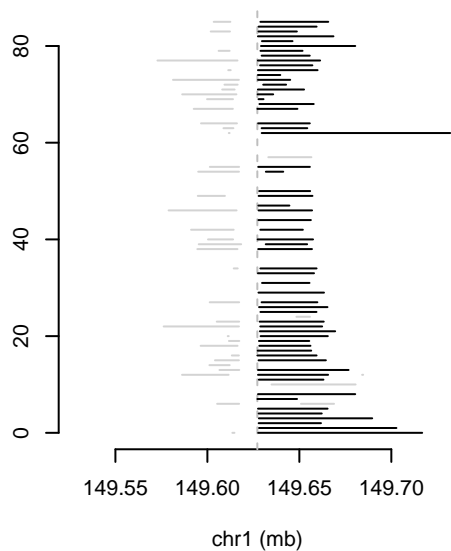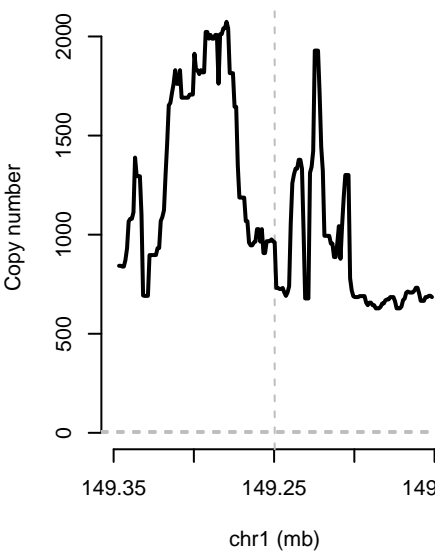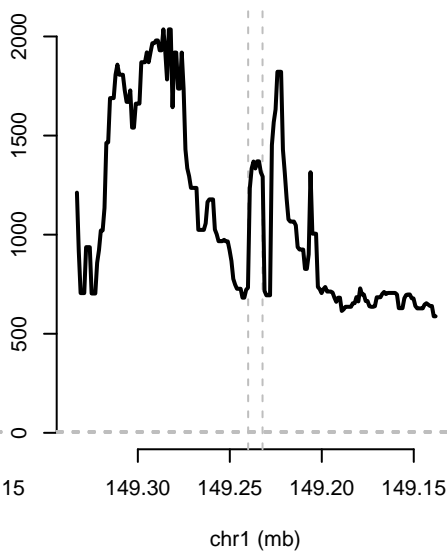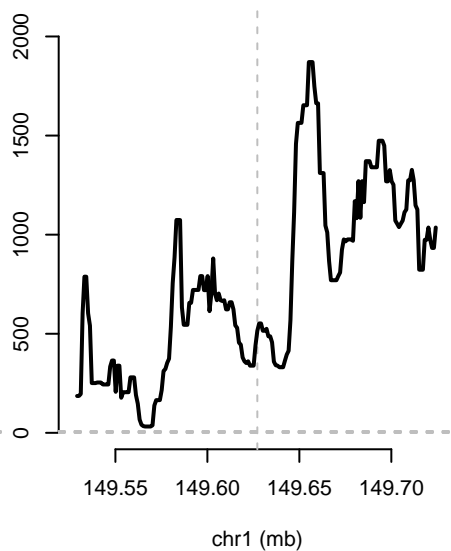

K562 chr1:149,232,220::chr1:149,627,158--

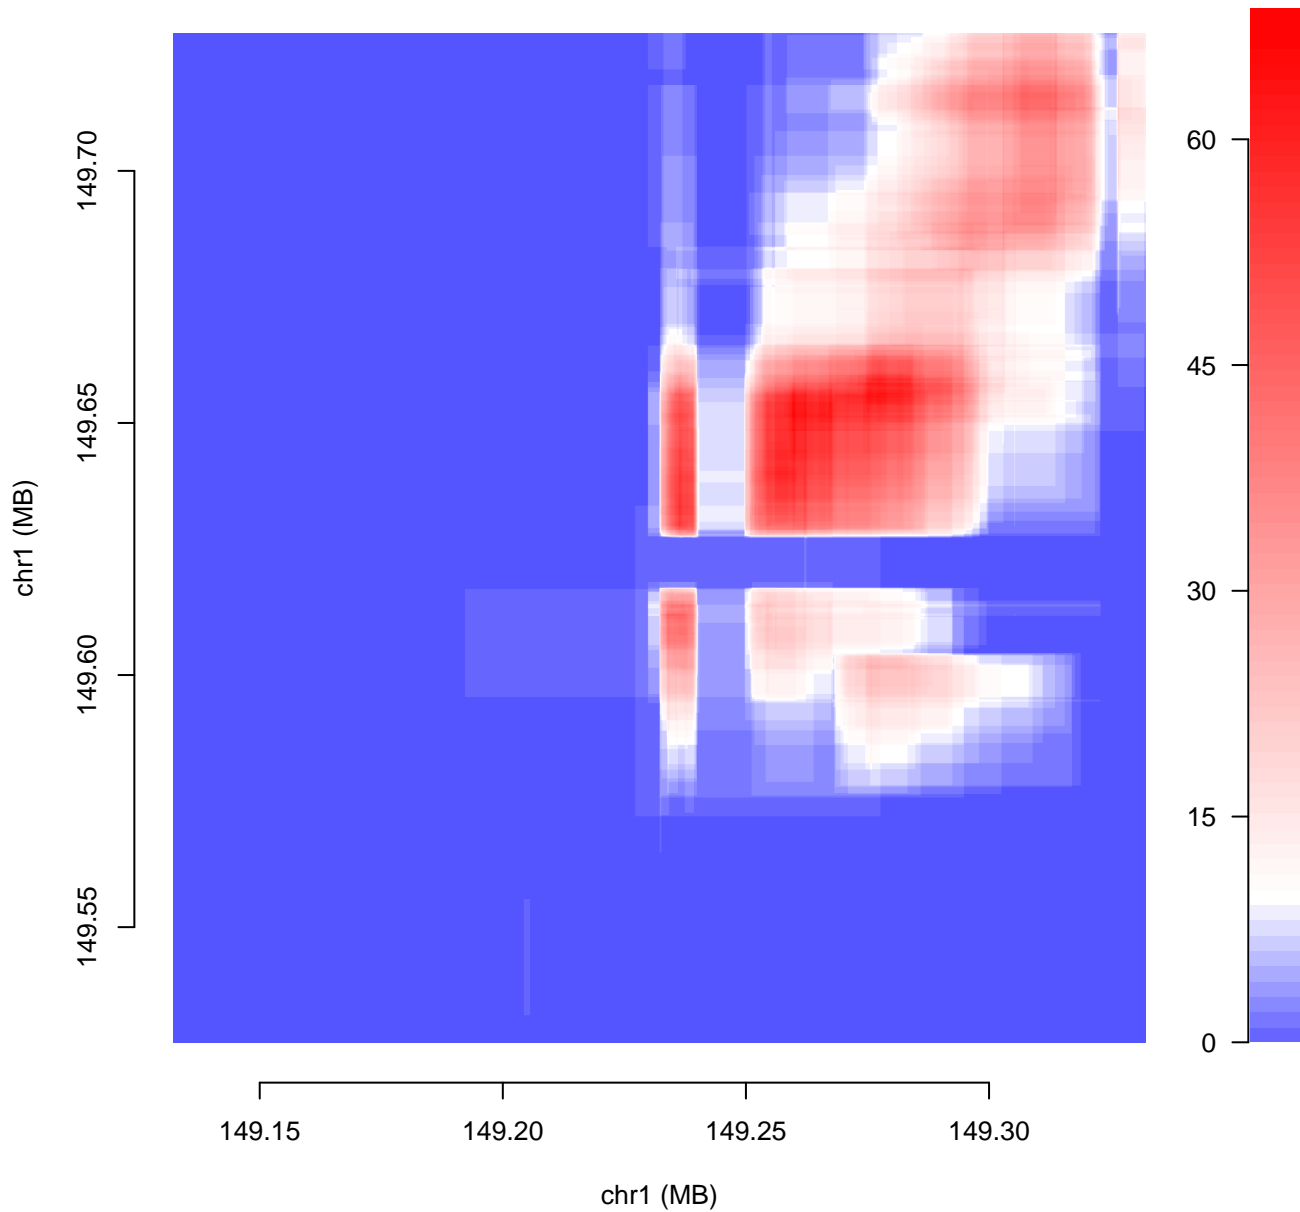

K562 chr1:149,232,220::chr1:149,240,029-+

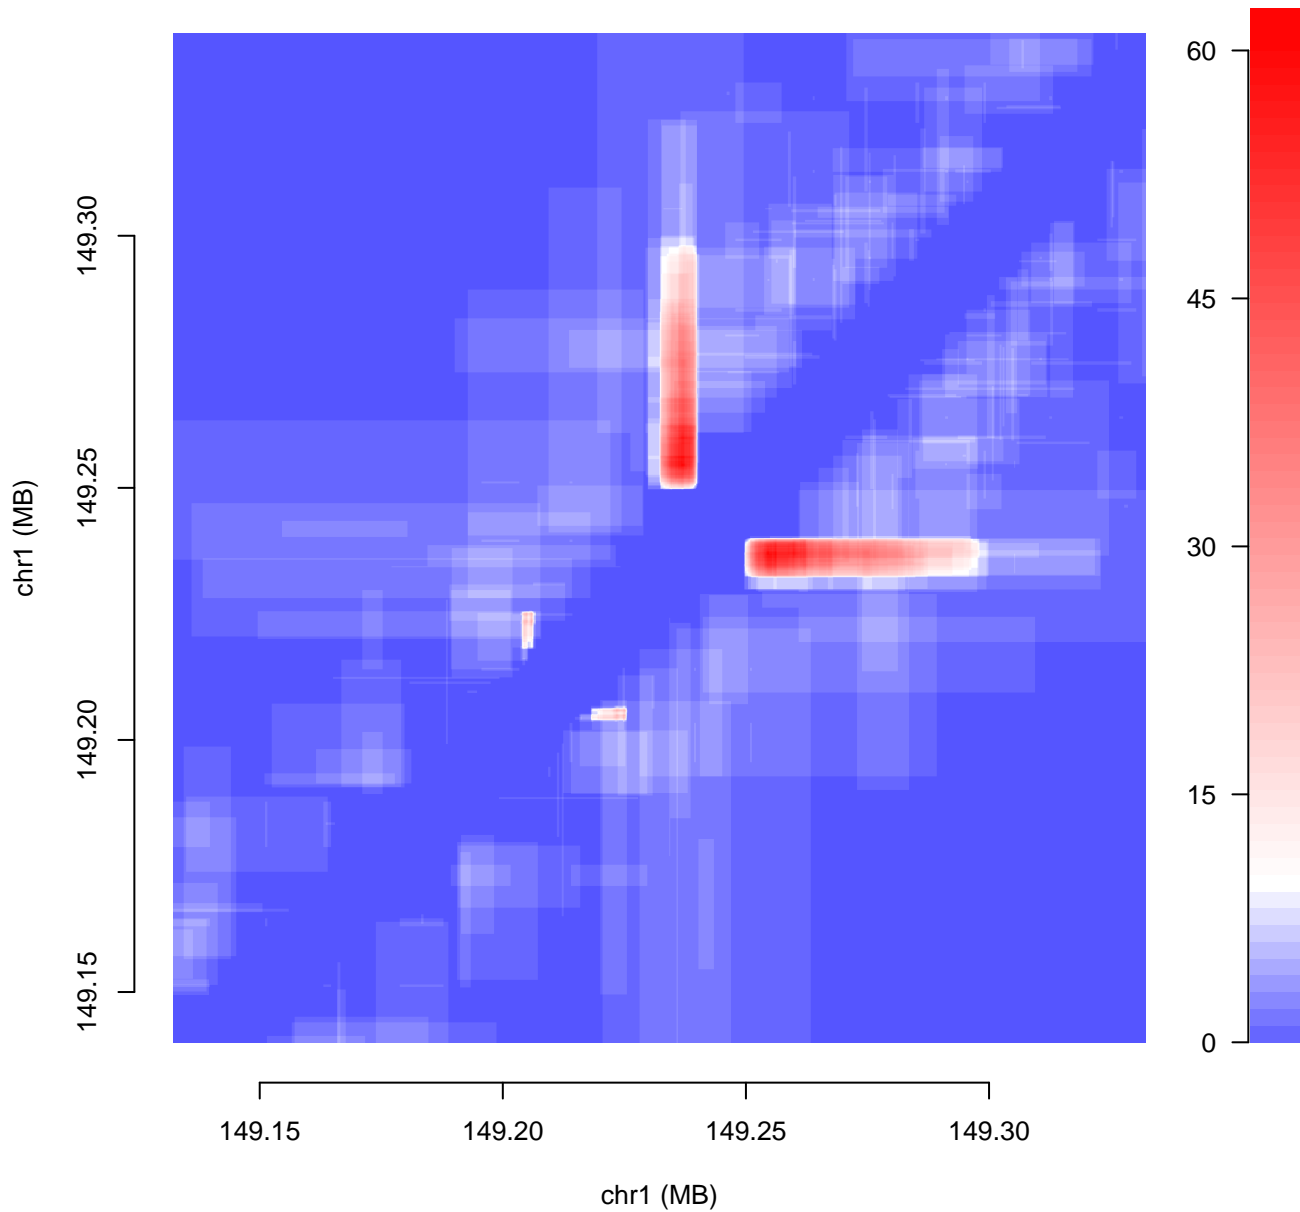

K562 chr1:149,249,633::chr1:149,240,029-+

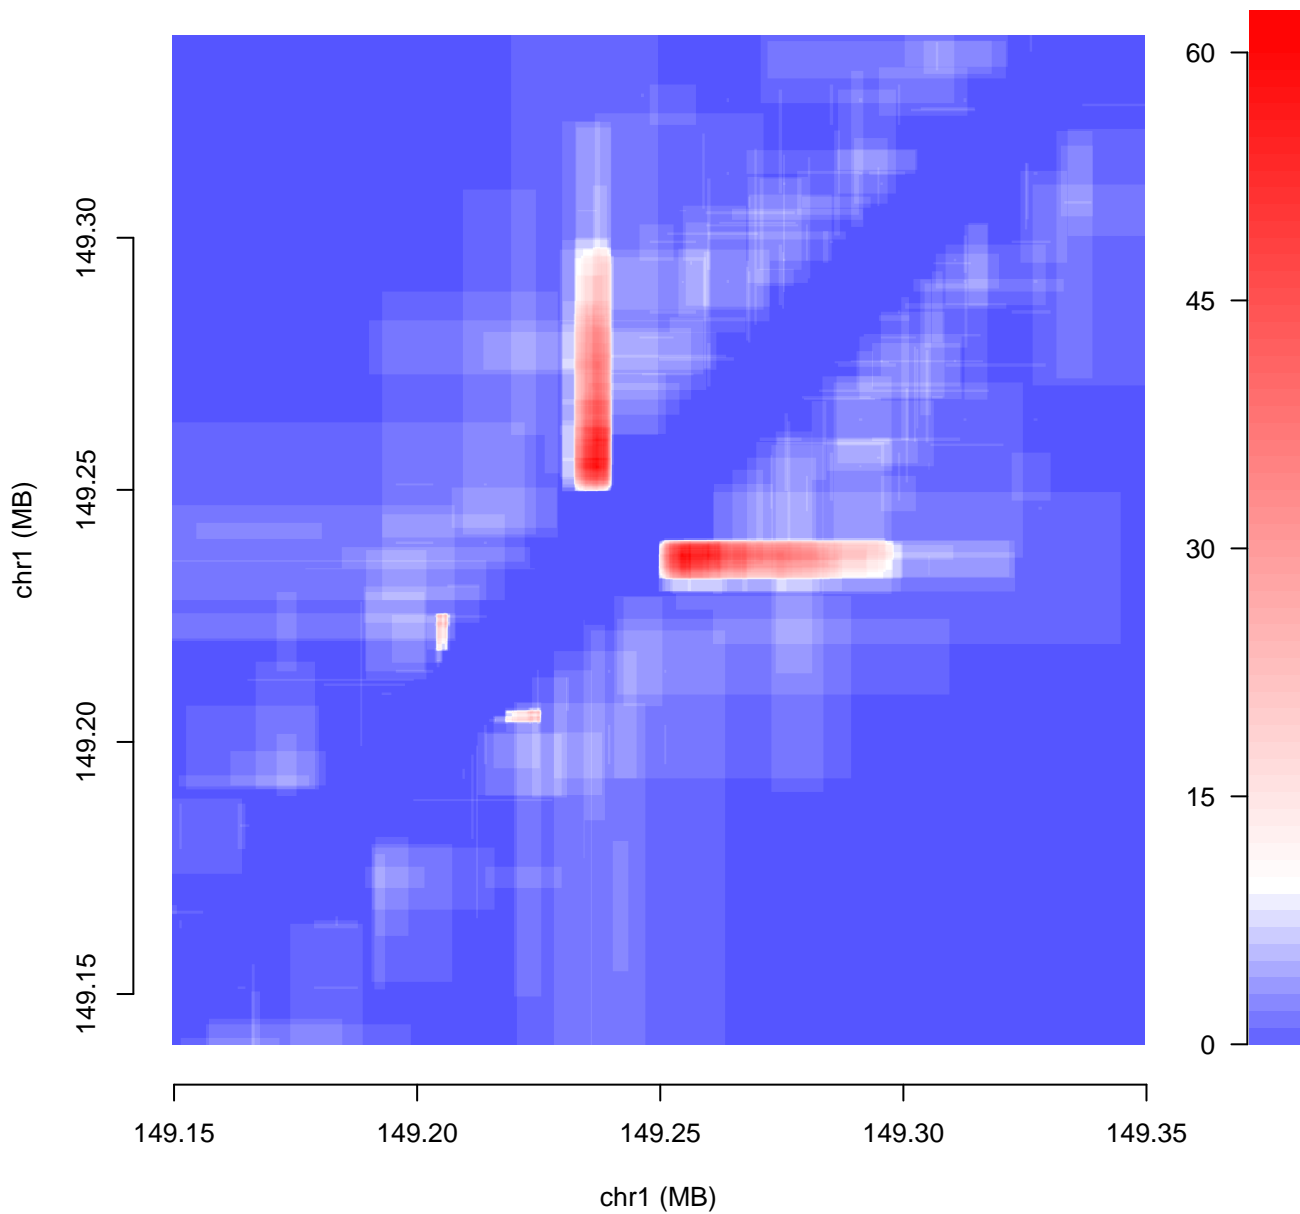

Supplement: Supplemental_Data.zip [file event_327.pdf › event_327.pdf]

Barcode

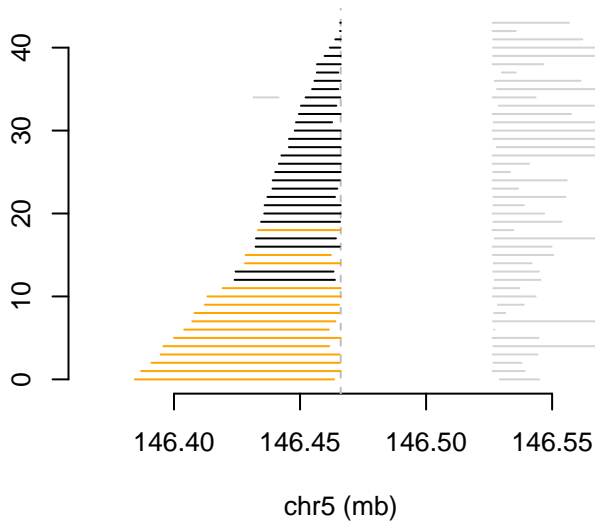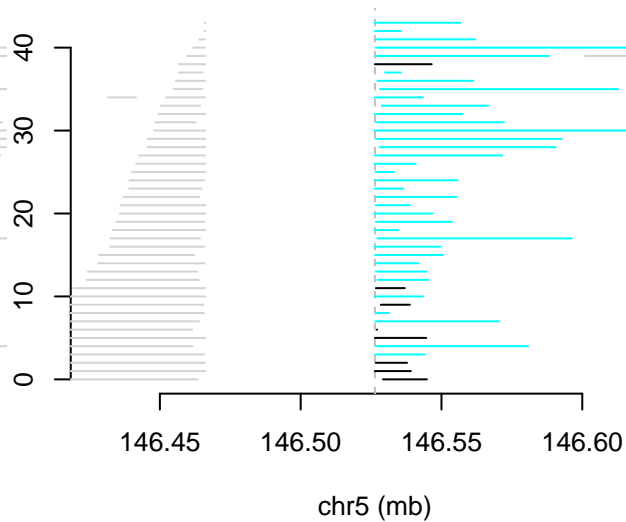

Copy number

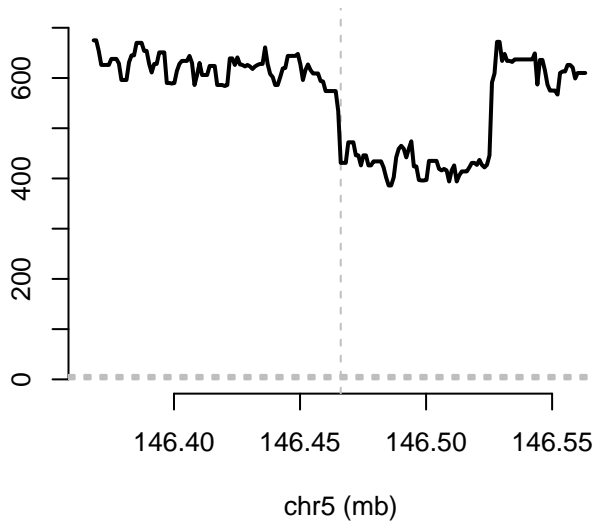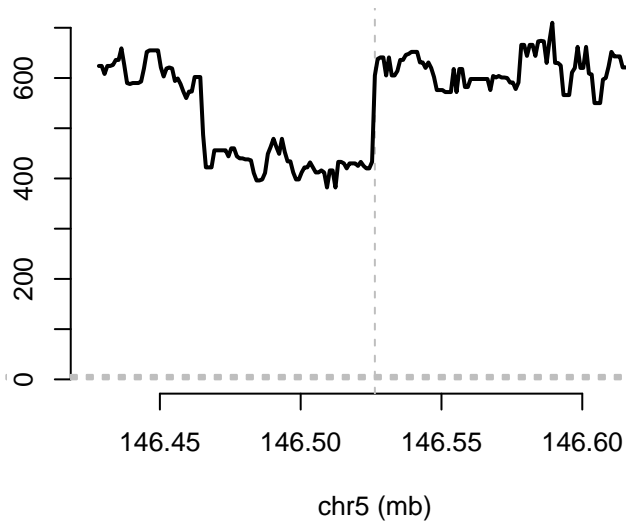

K562 chr5:146,526,345::chr5:146,466,145-+

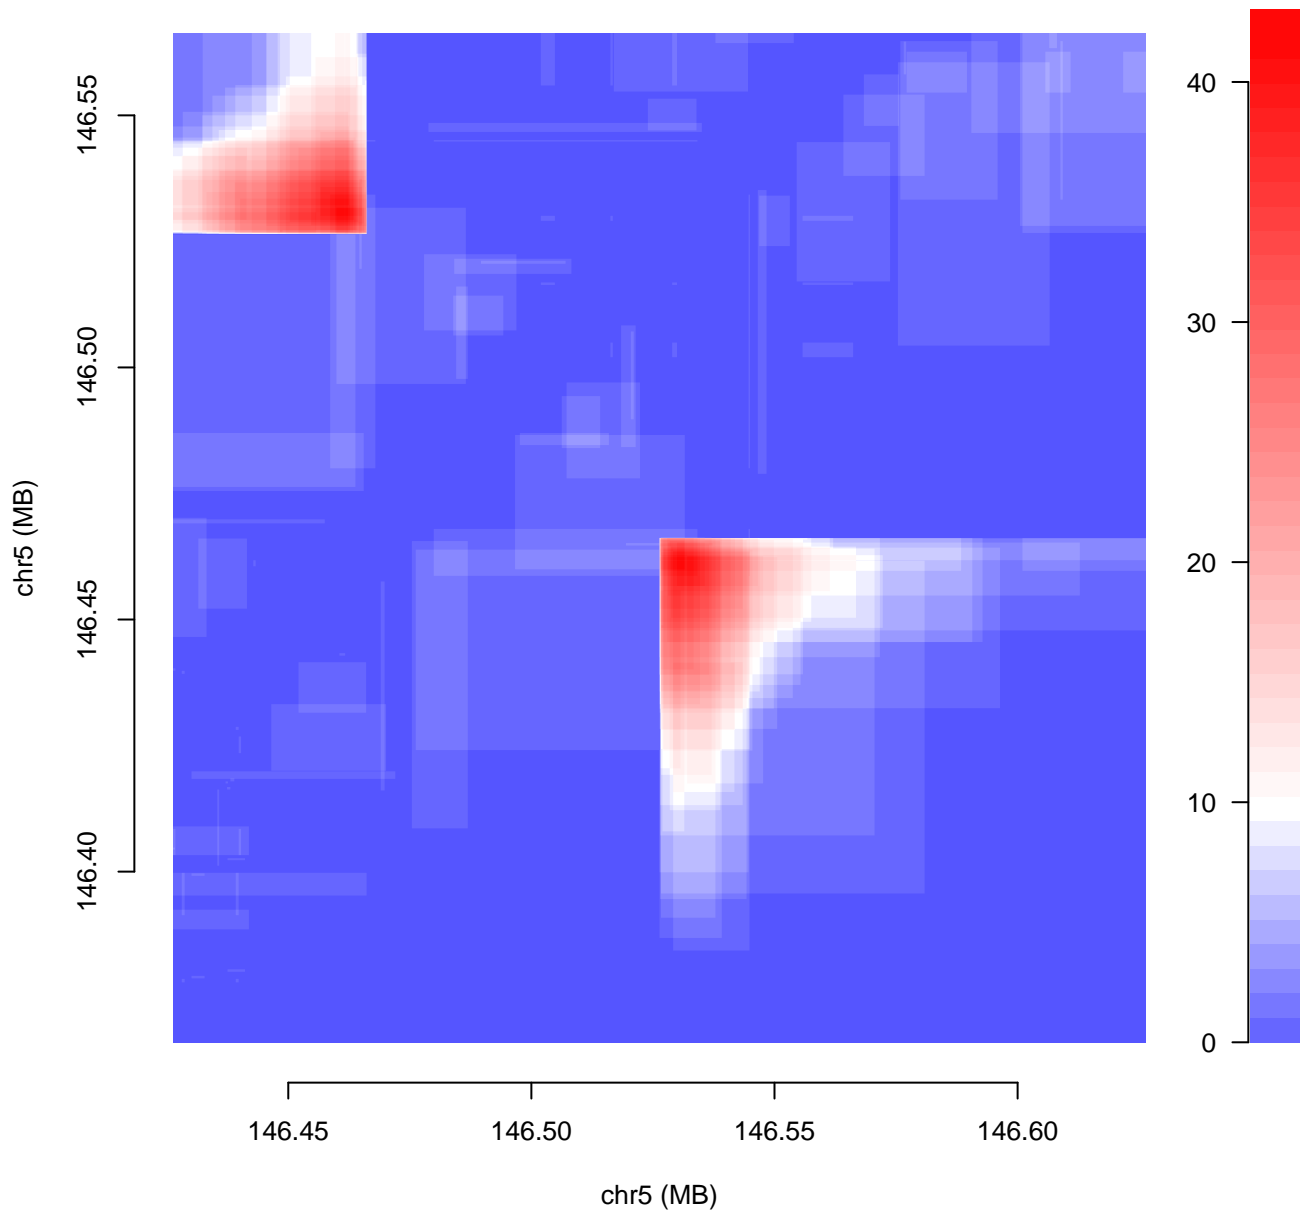

Supplement: Supplemental_Data.zip [file event_328.pdf › event_328.pdf]

Barcode

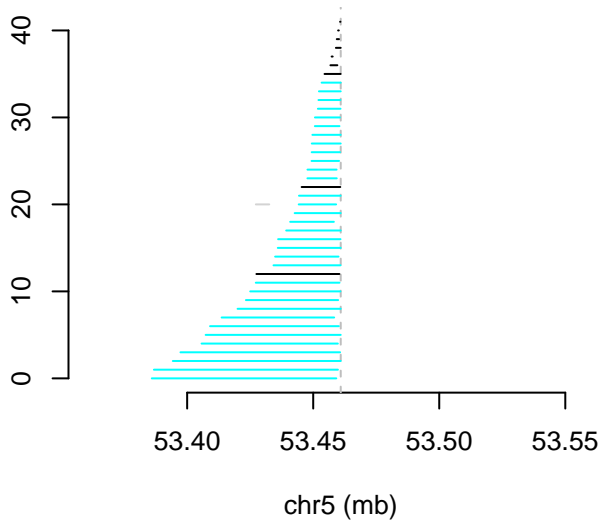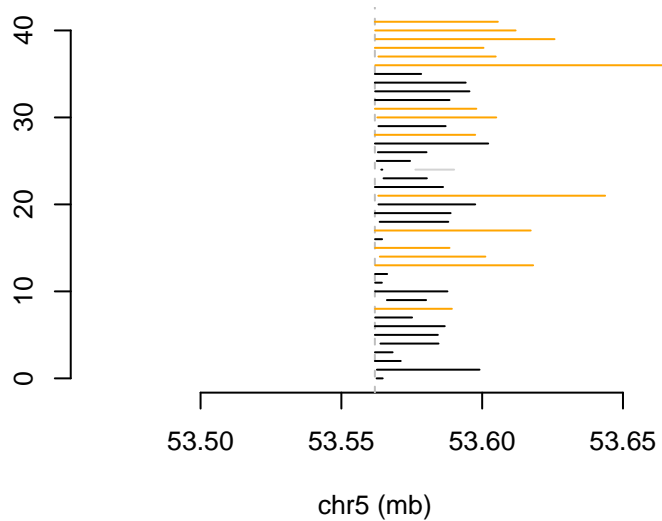

Copy number

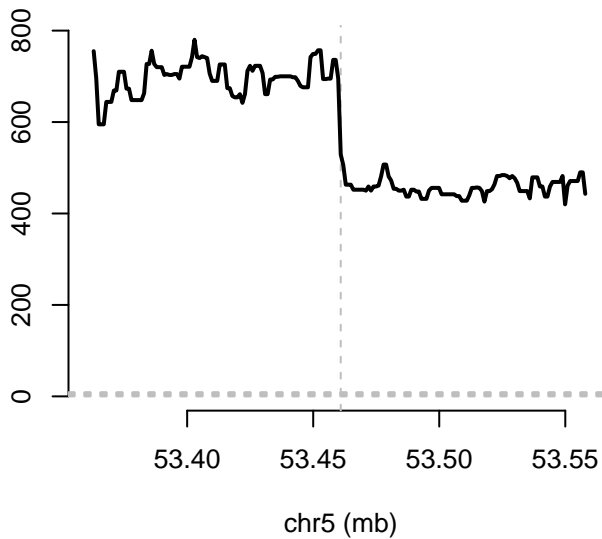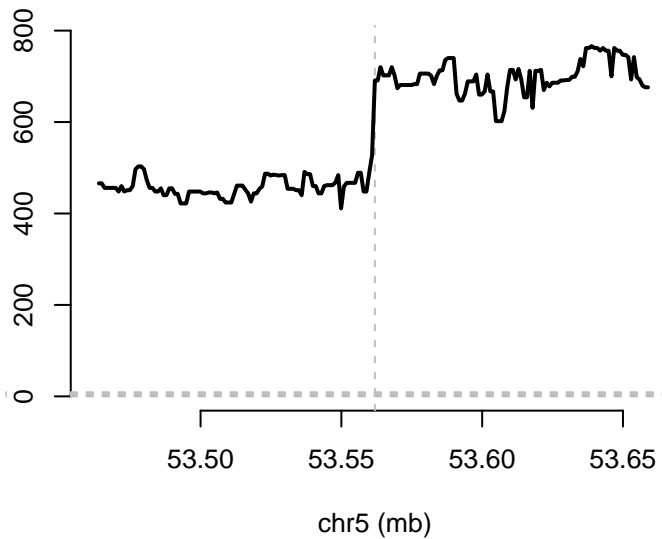

K562 chr5:53,561,892::chr5:53,460,924--+

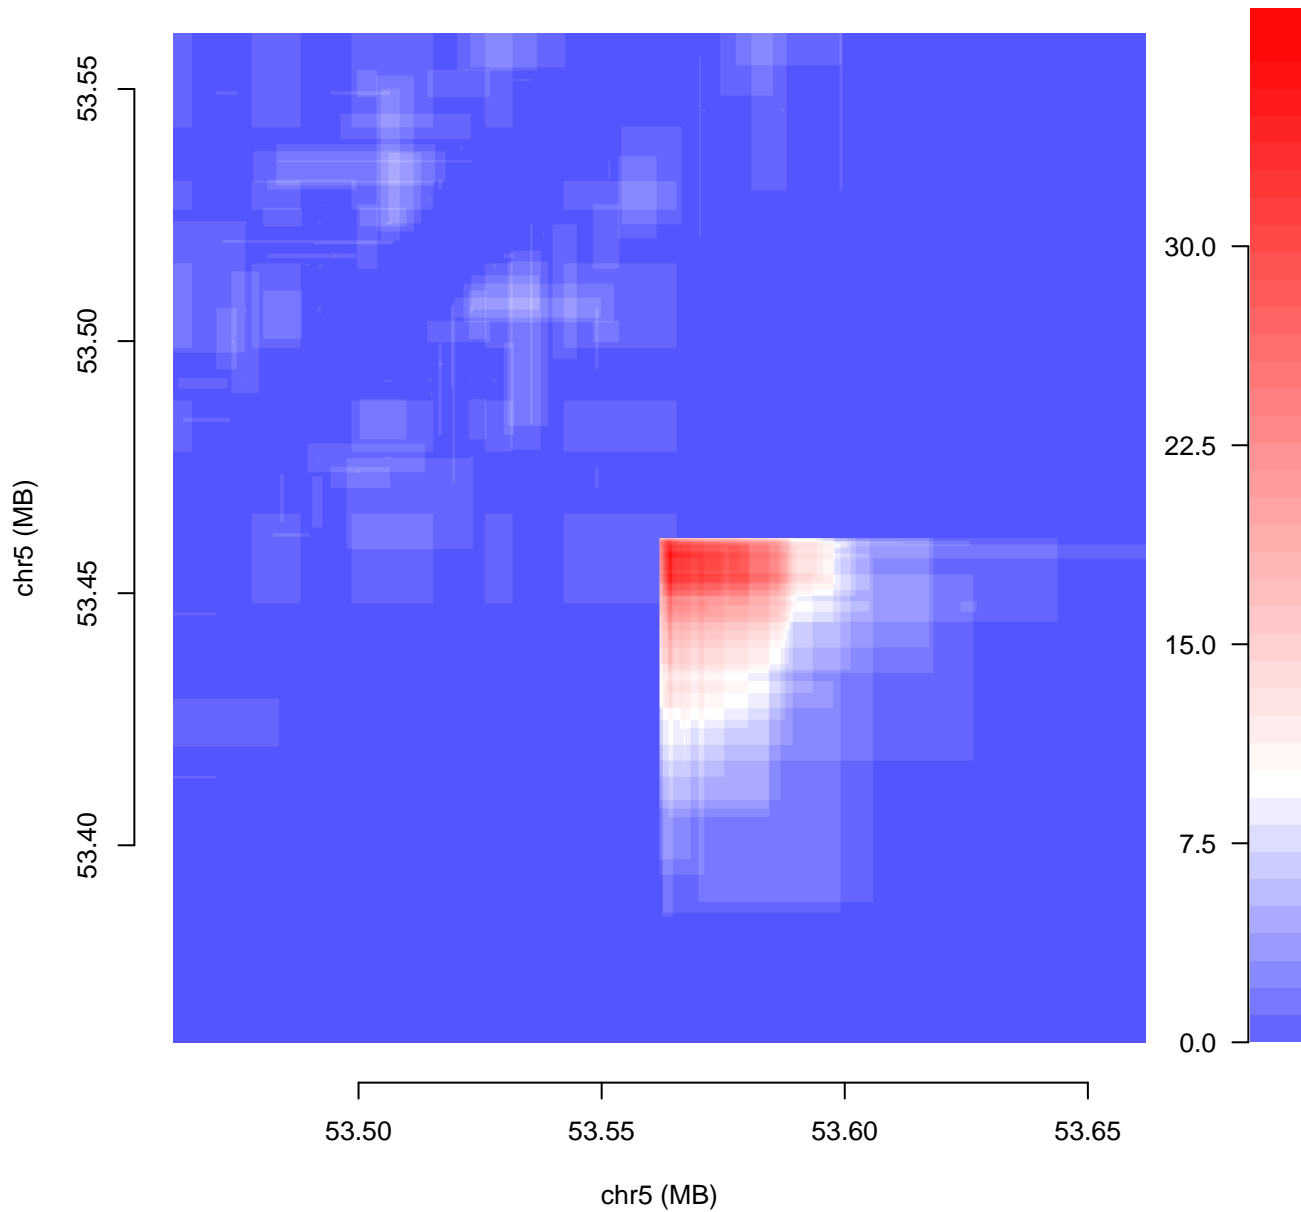

Supplement: Supplemental_Data.zip [file event_329.pdf › event_329.pdf]

Barcode

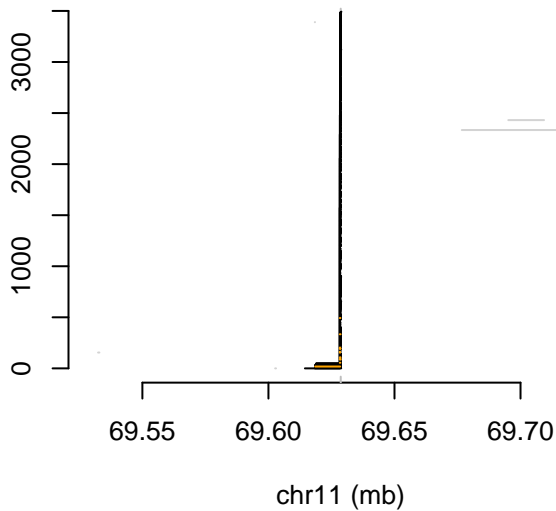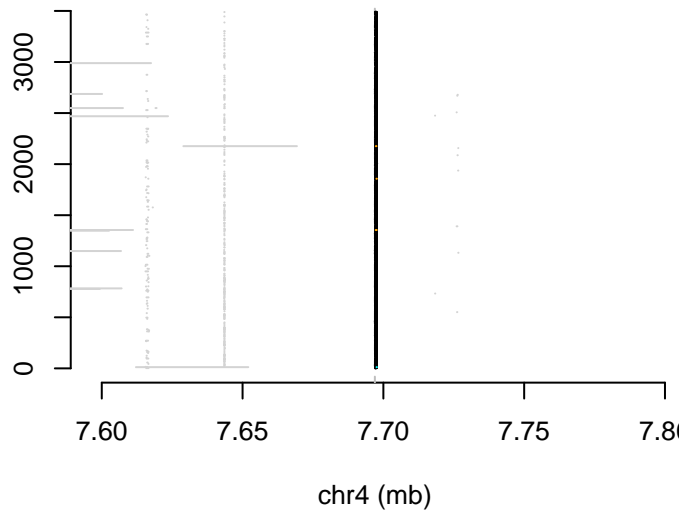

Copy number

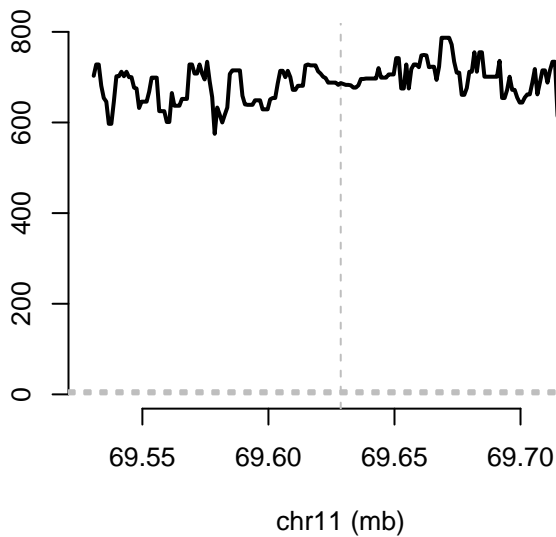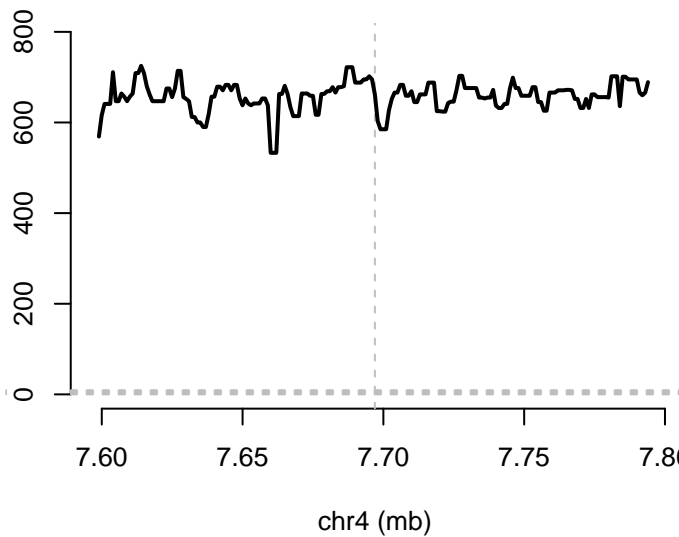

K562 chr4:7,696,982::chr11:69,628,683-+

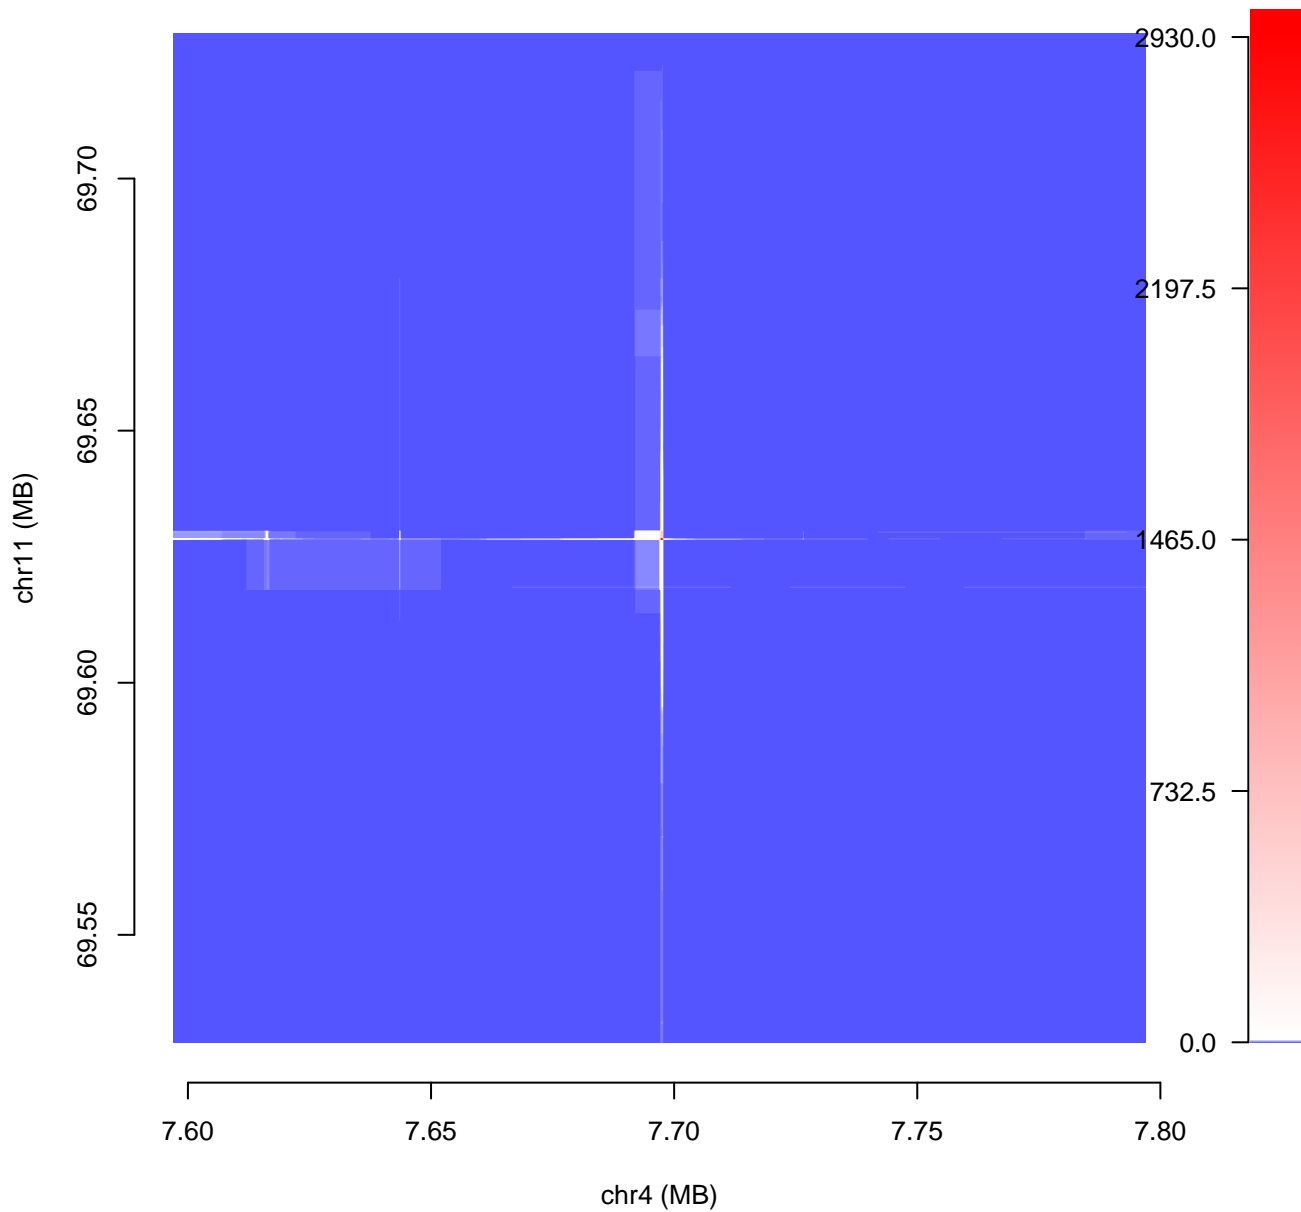

Supplement: Supplemental_Data.zip [file event_33.pdf › event_33.pdf]

Barcode

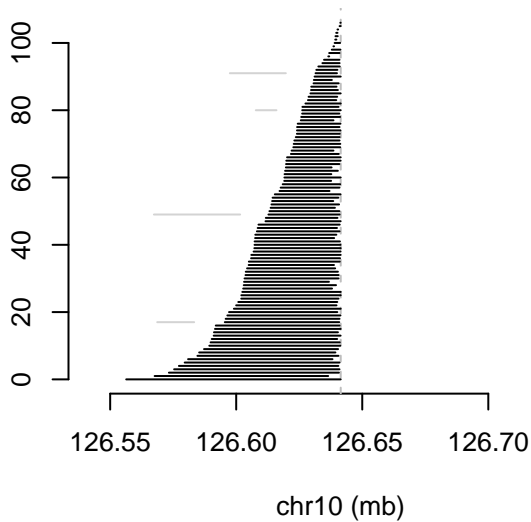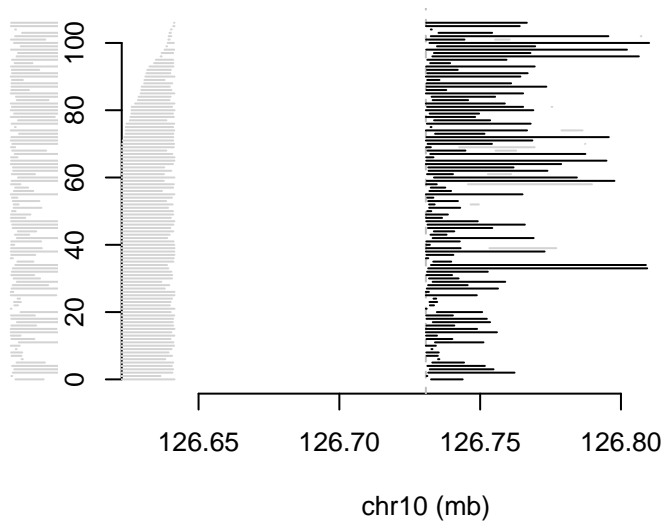

Copy number

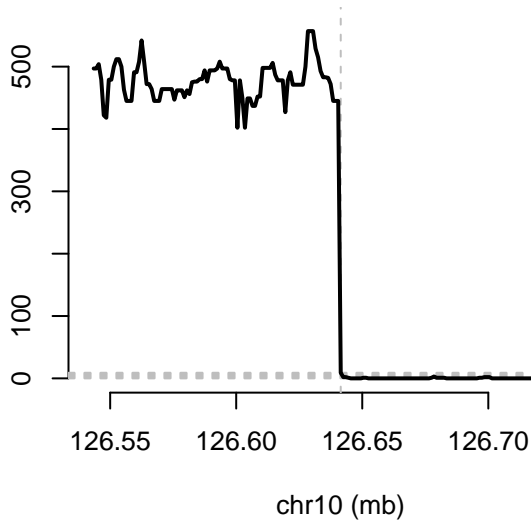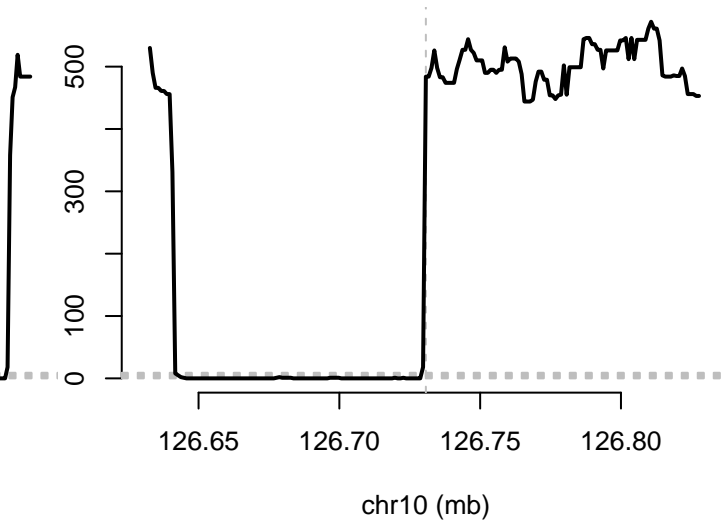

K562 chr10:126,730,718::chr10:126,641,468-+

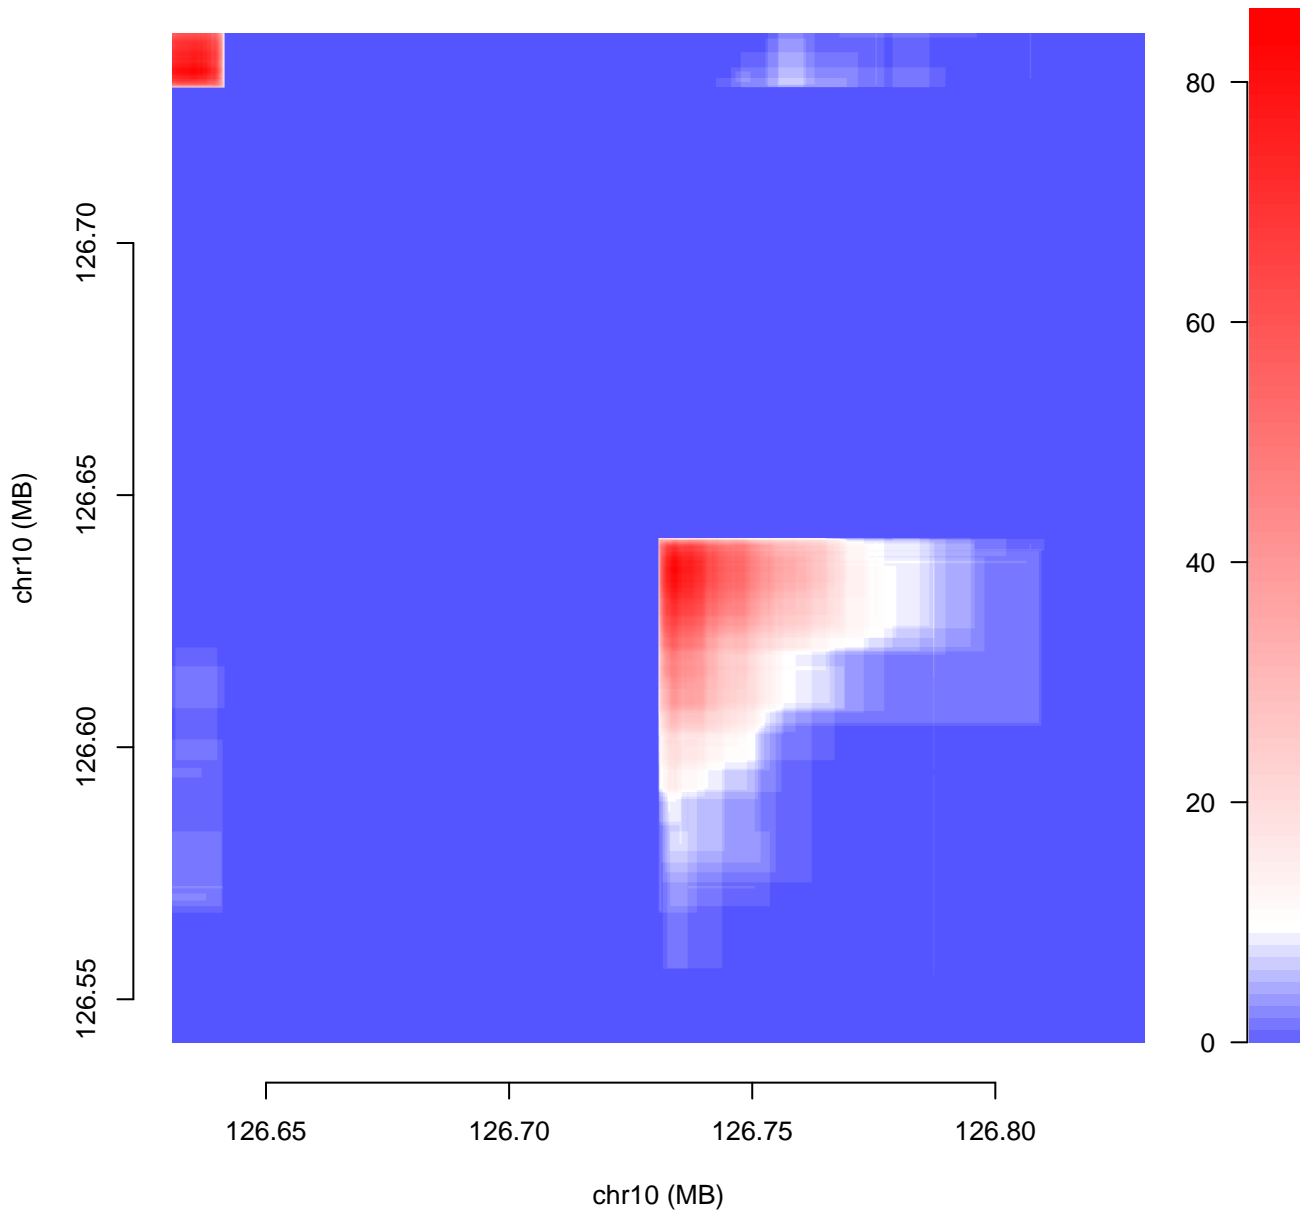

Supplement: Supplemental_Data.zip [file event_330.pdf › event_330.pdf]

Barcode

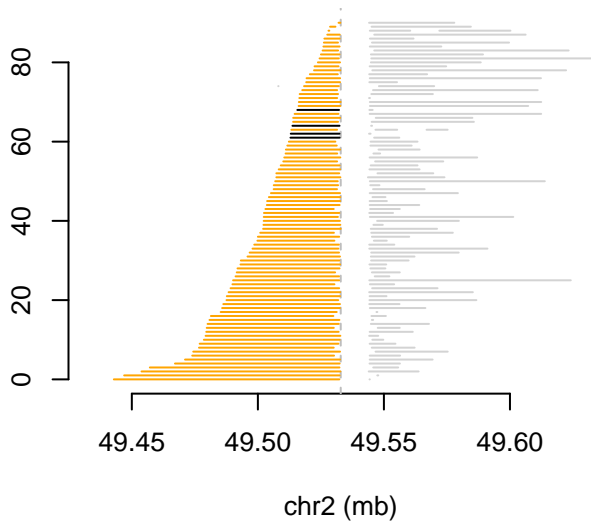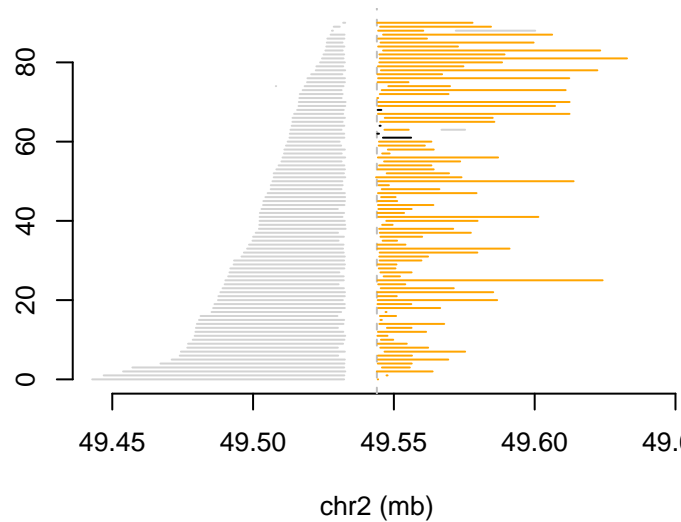

Copy number

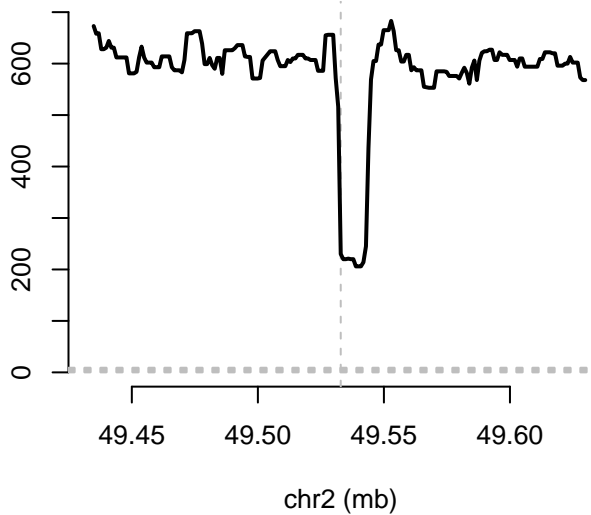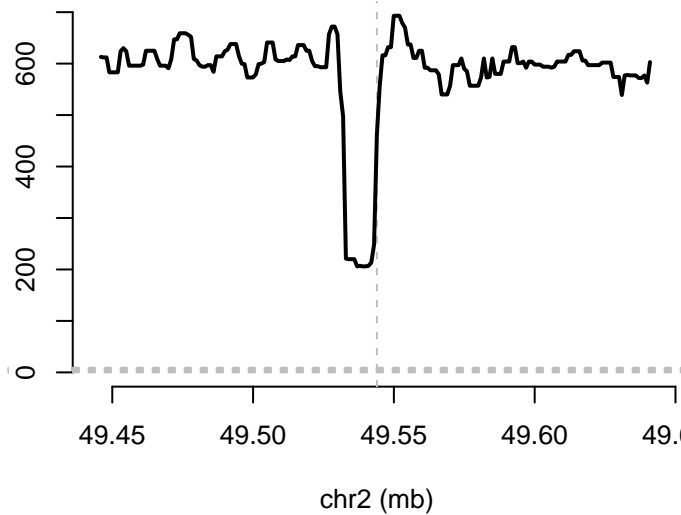

K562 chr2:49,543,962::chr2:49,532,874-+

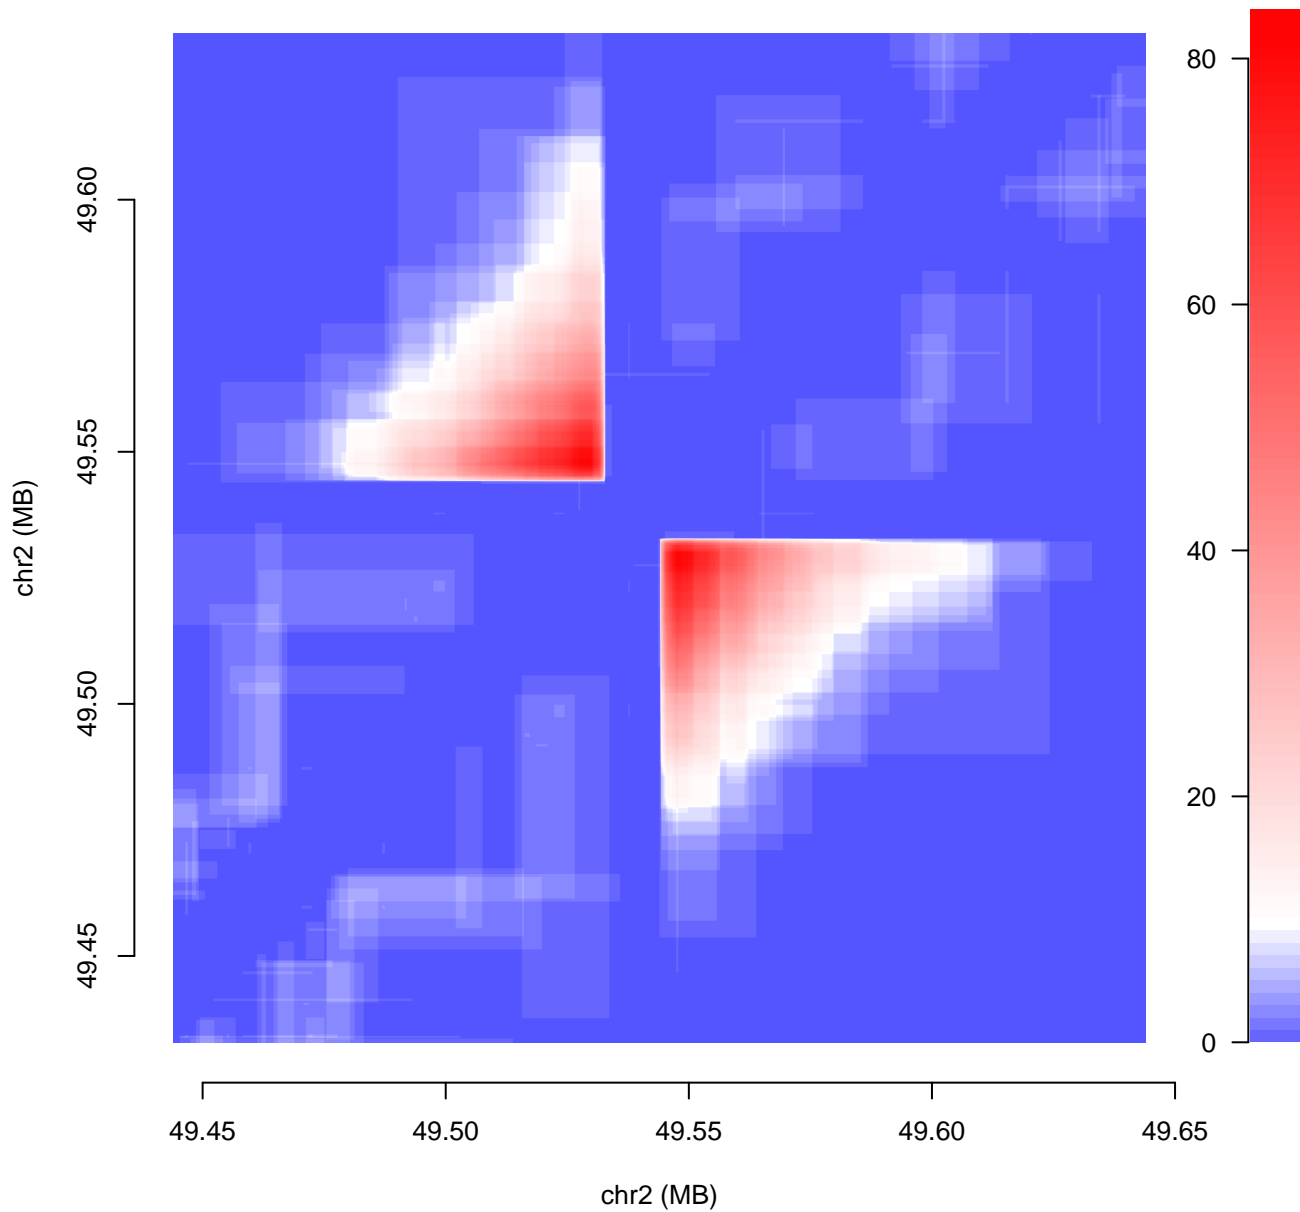

Supplement: Supplemental_Data.zip [file event_331.pdf › event_331.pdf]

Barcode

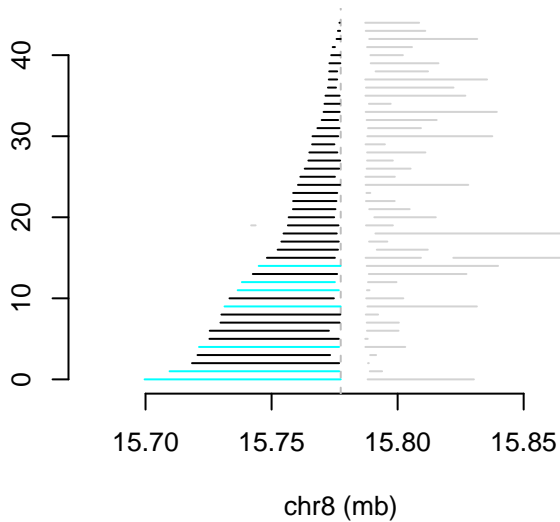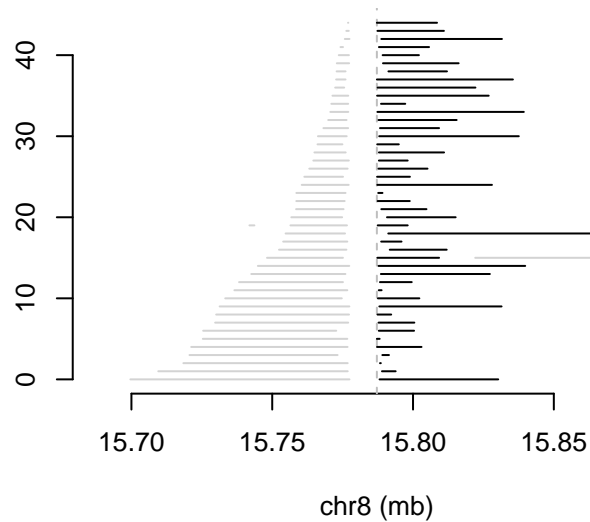

Copy number

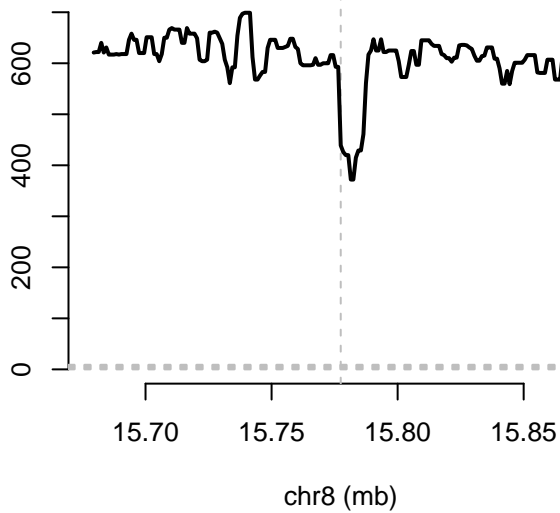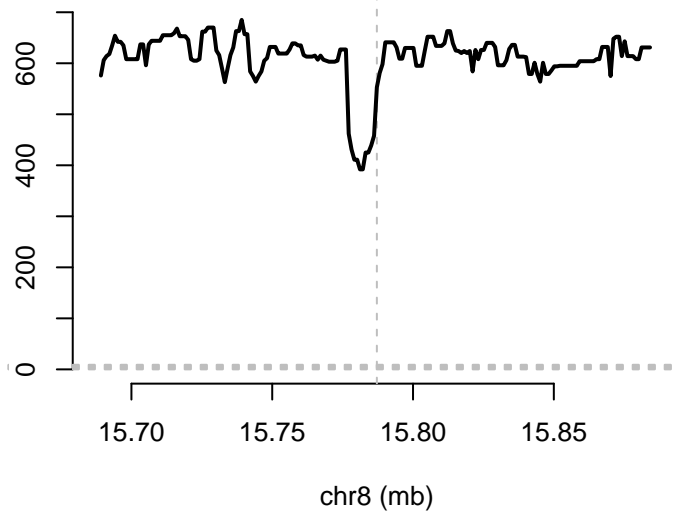

K562 chr8:15,787,160::chr8:15,777,435-+

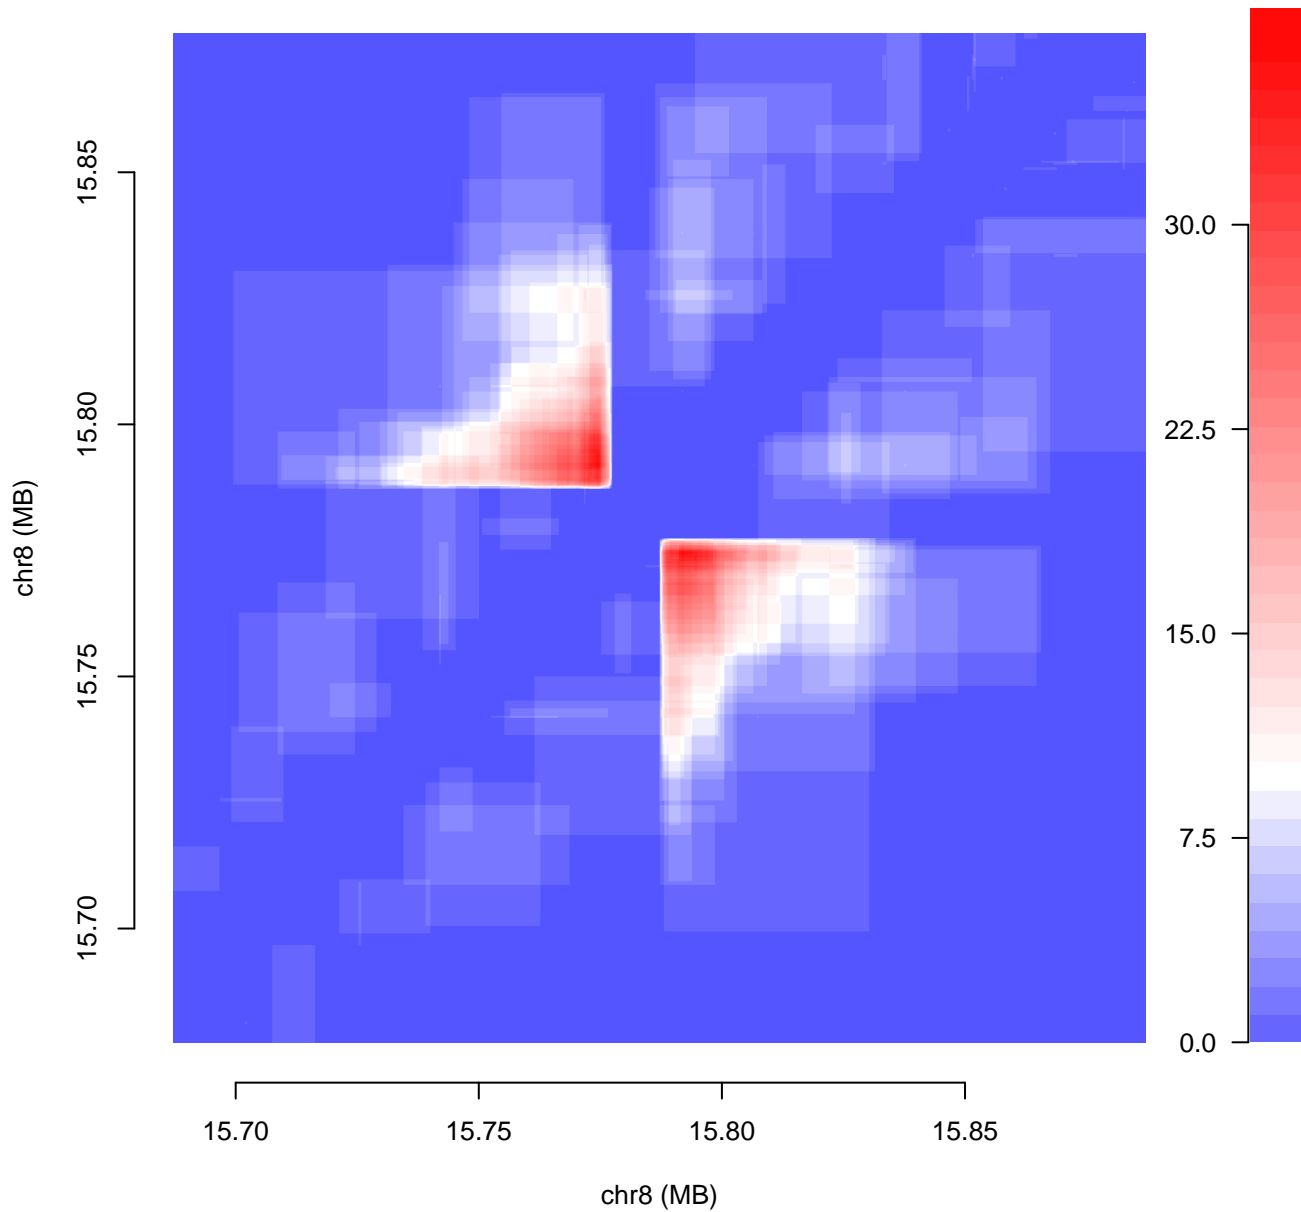

Supplement: Supplemental_Data.zip [file event_332.pdf › event_332.pdf]

Barcode

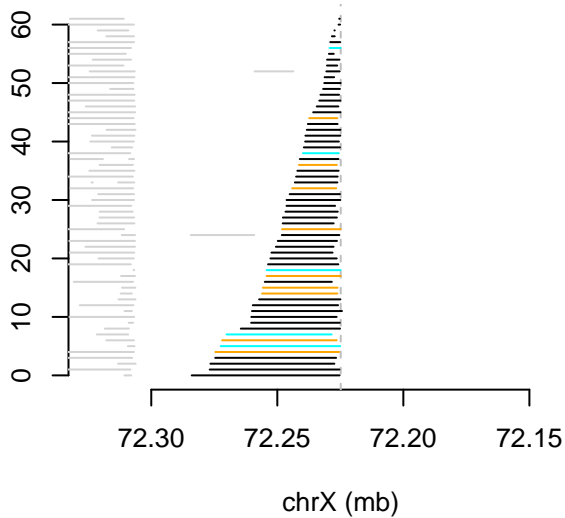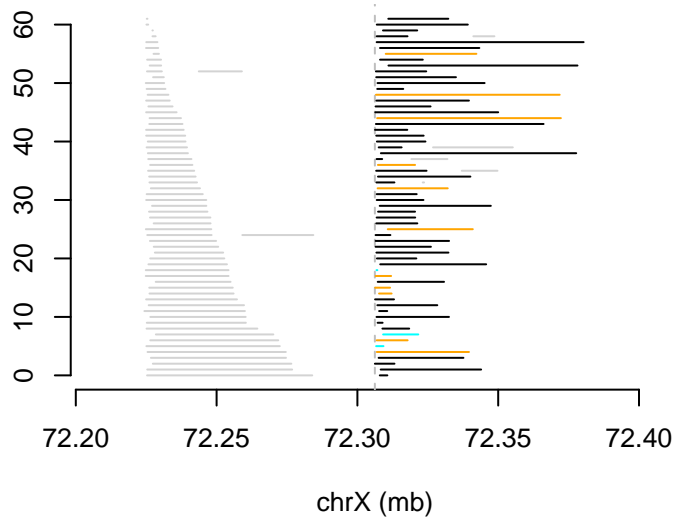

Copy number

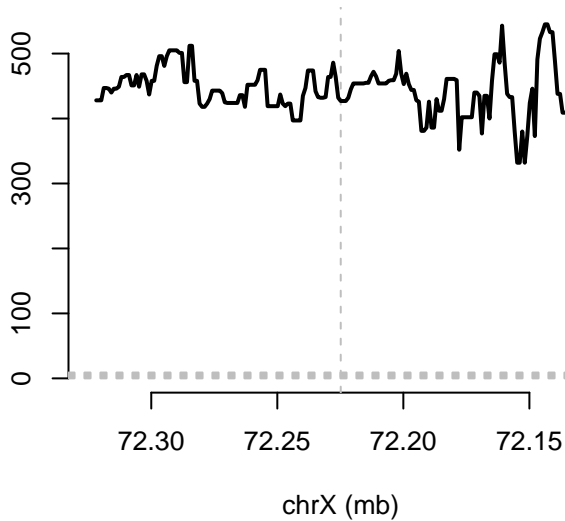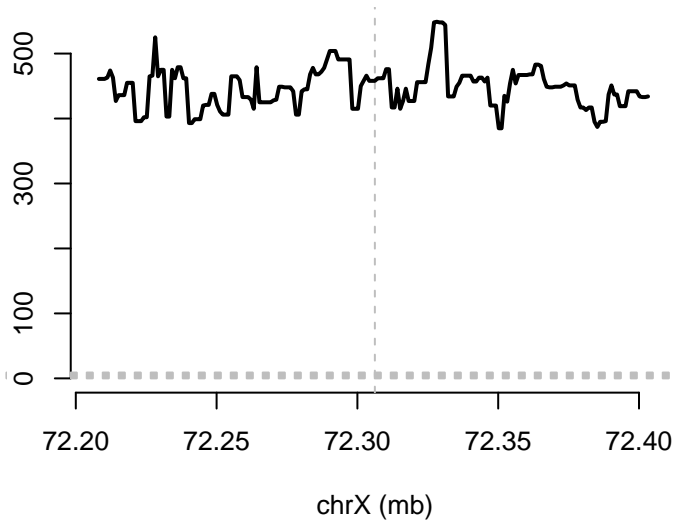

K562 chrX:72,306,201::chrX:72,224,836--

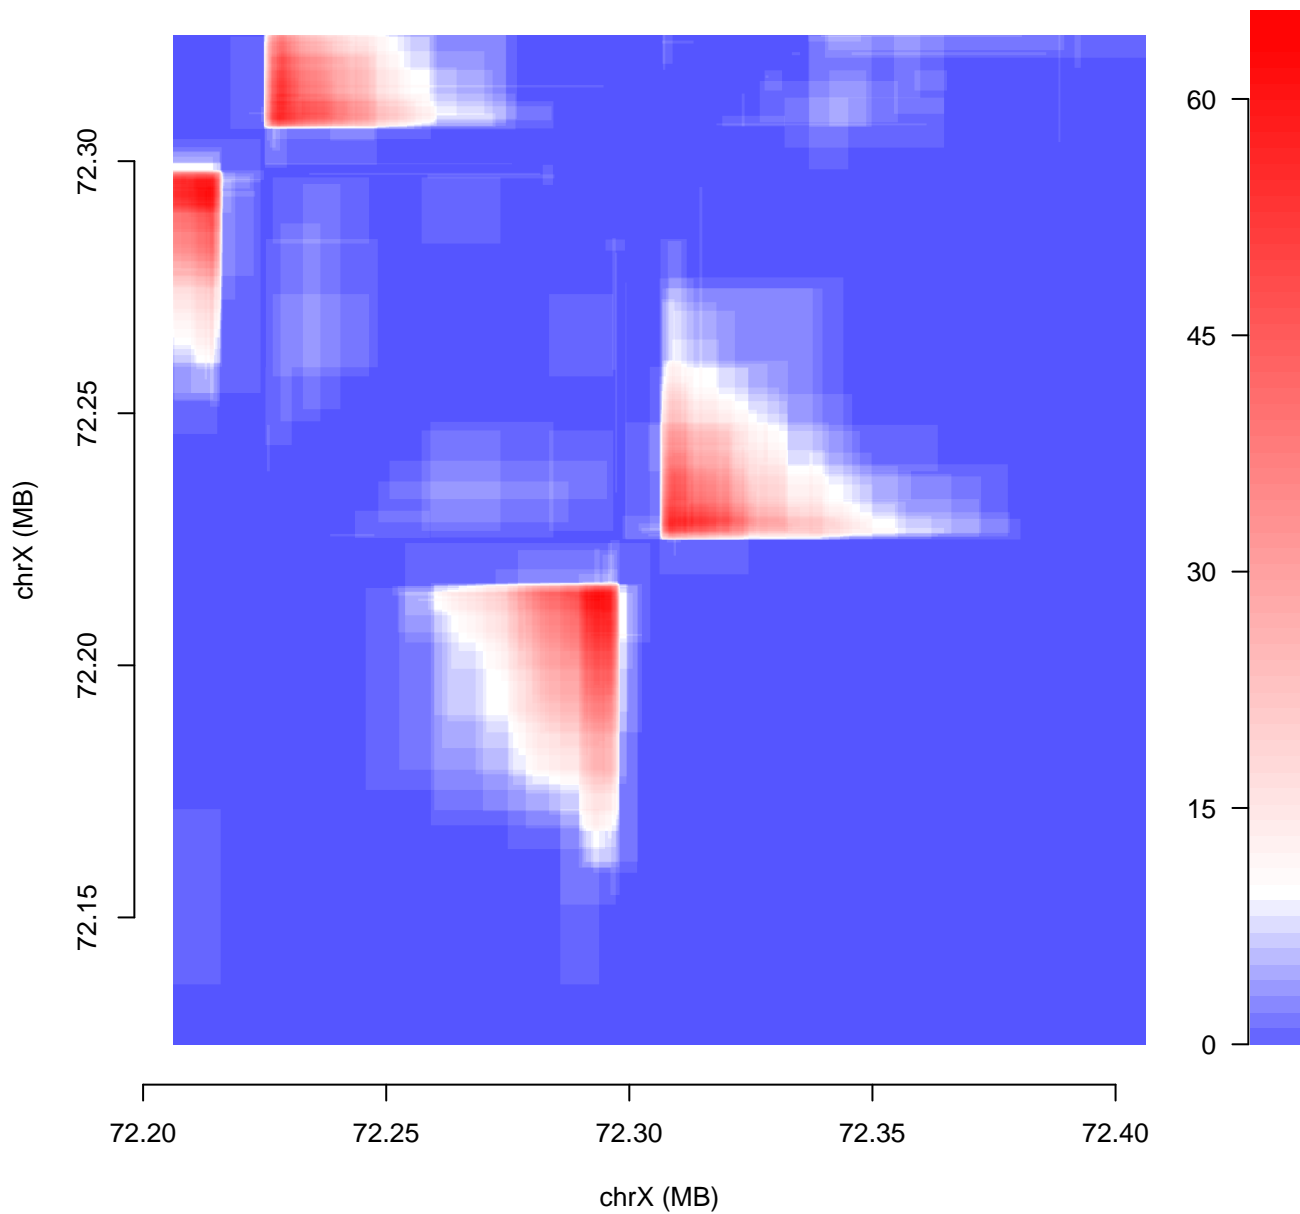

Supplement: Supplemental_Data.zip [file event_333.pdf › event_333.pdf]

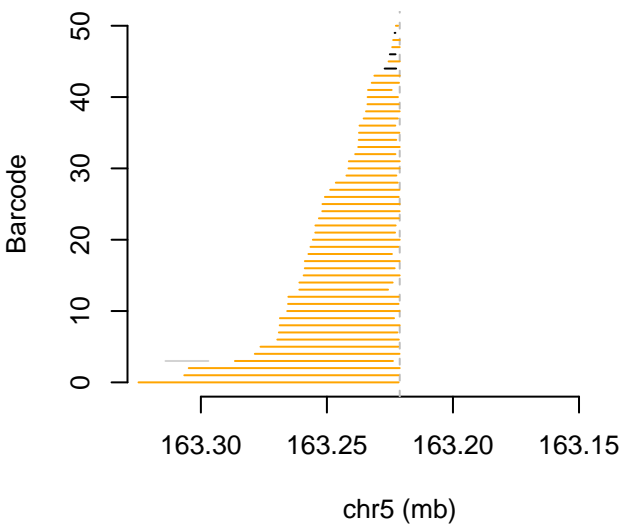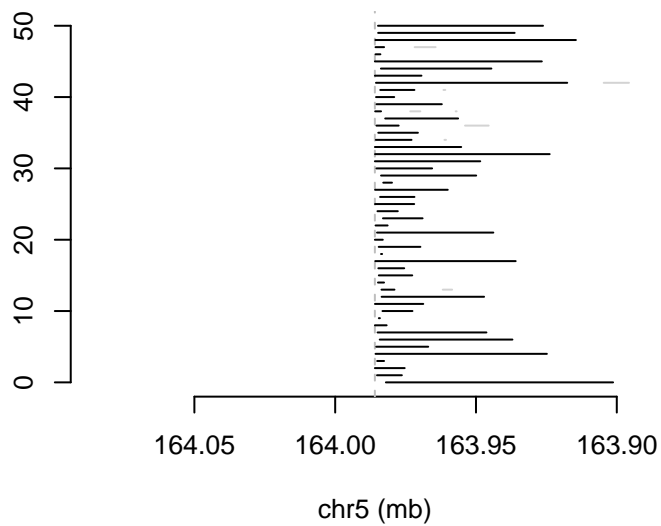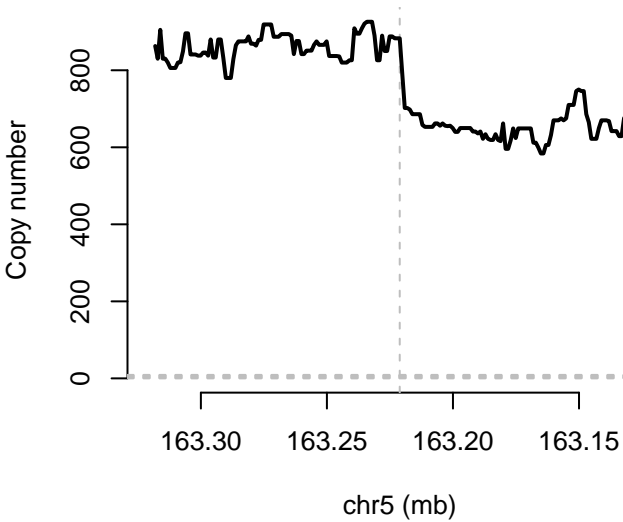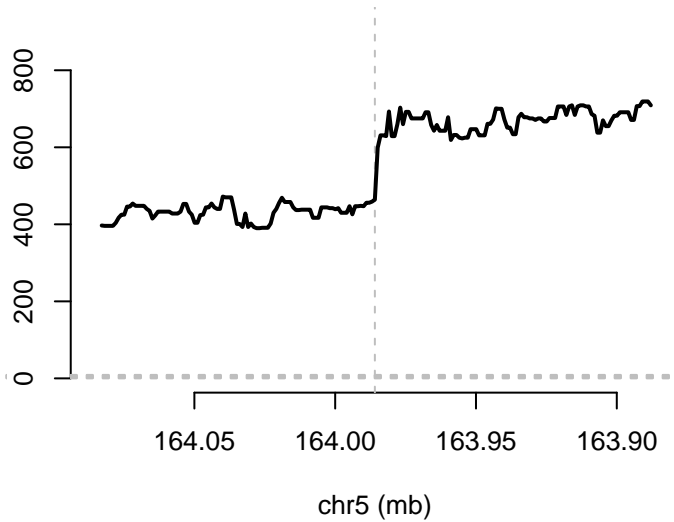

K562 chr5:163,221,111::chr5:163,985,908—+

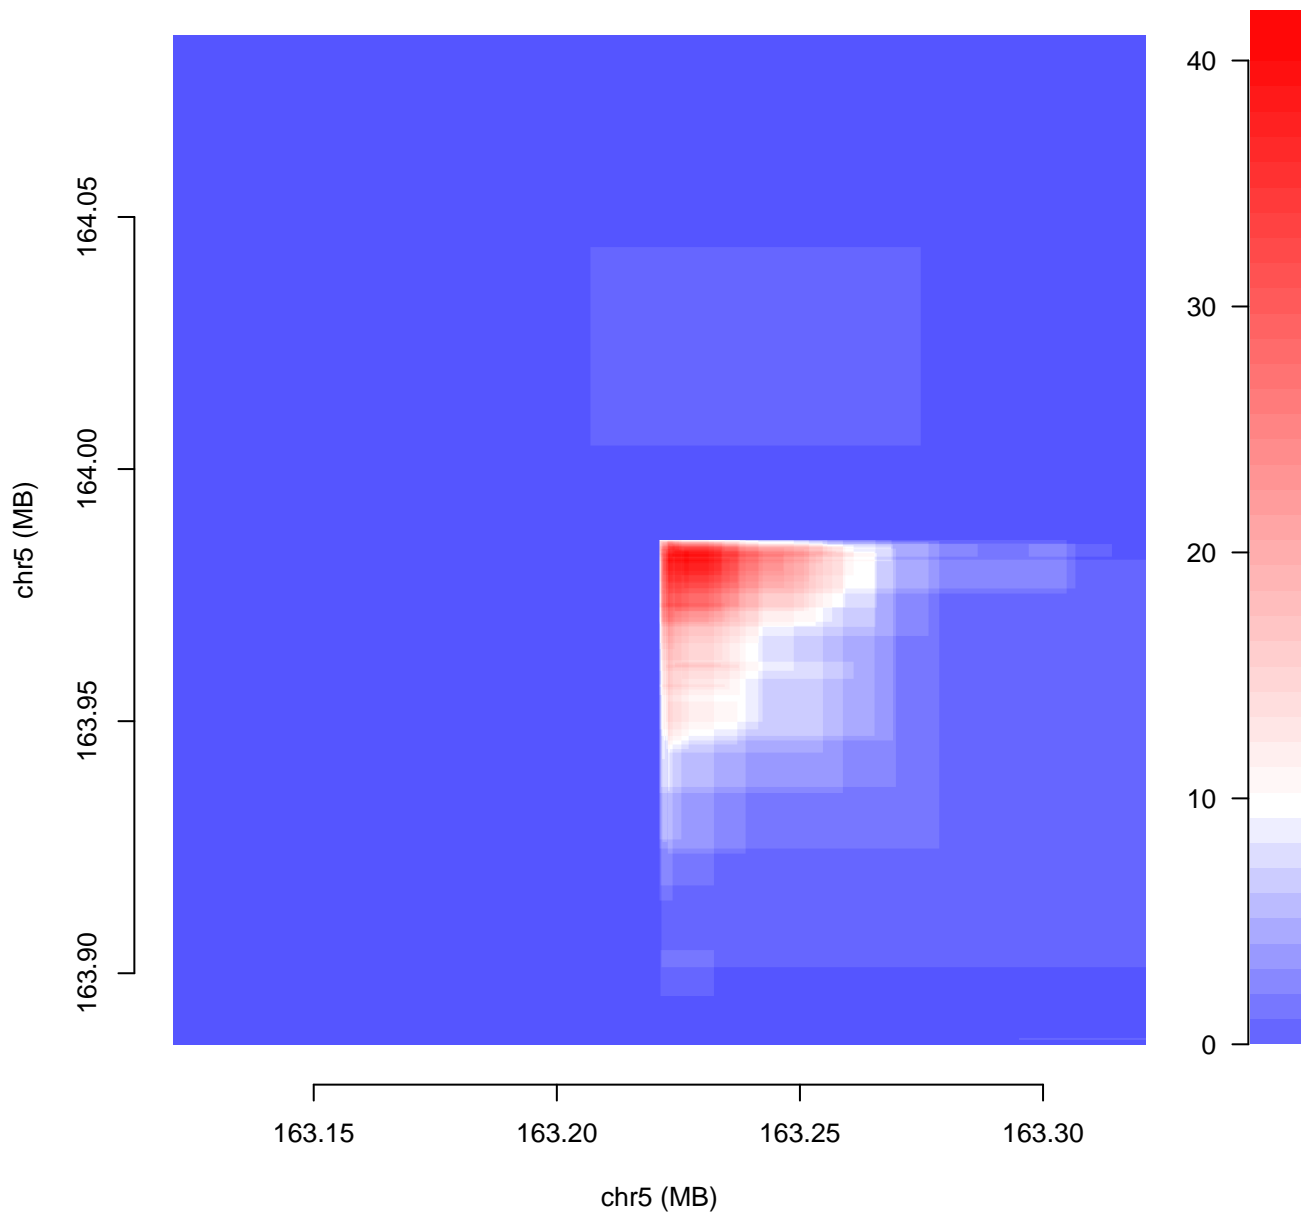

Supplement: Supplemental_Data.zip [file event_334.pdf › event_334.pdf]

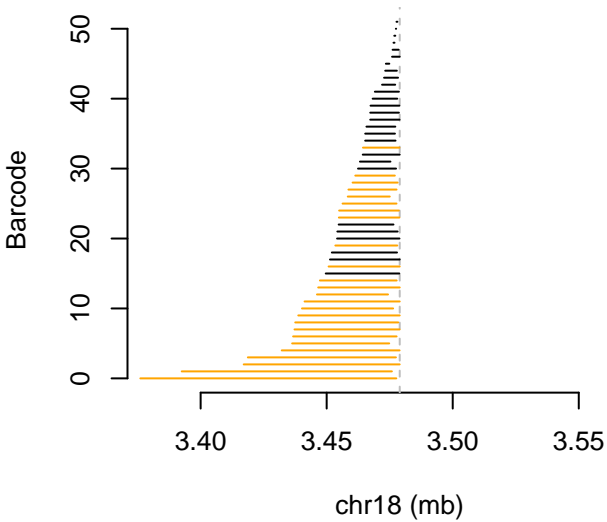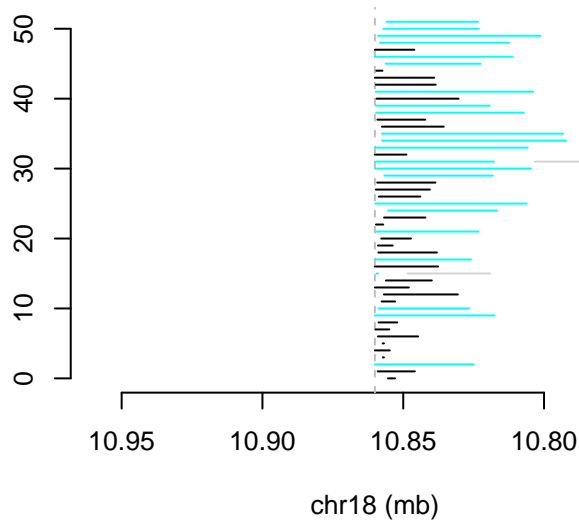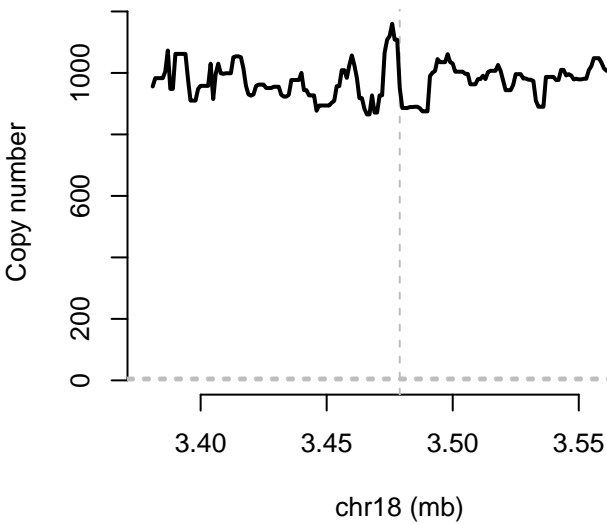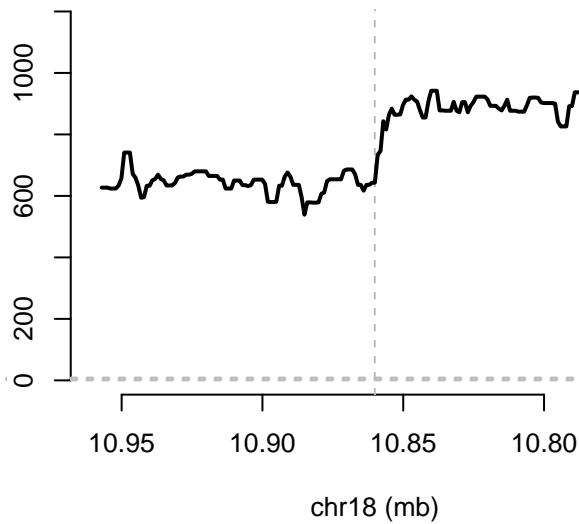

**K562 chr18:10,860,072::chr18:3,478,985++**

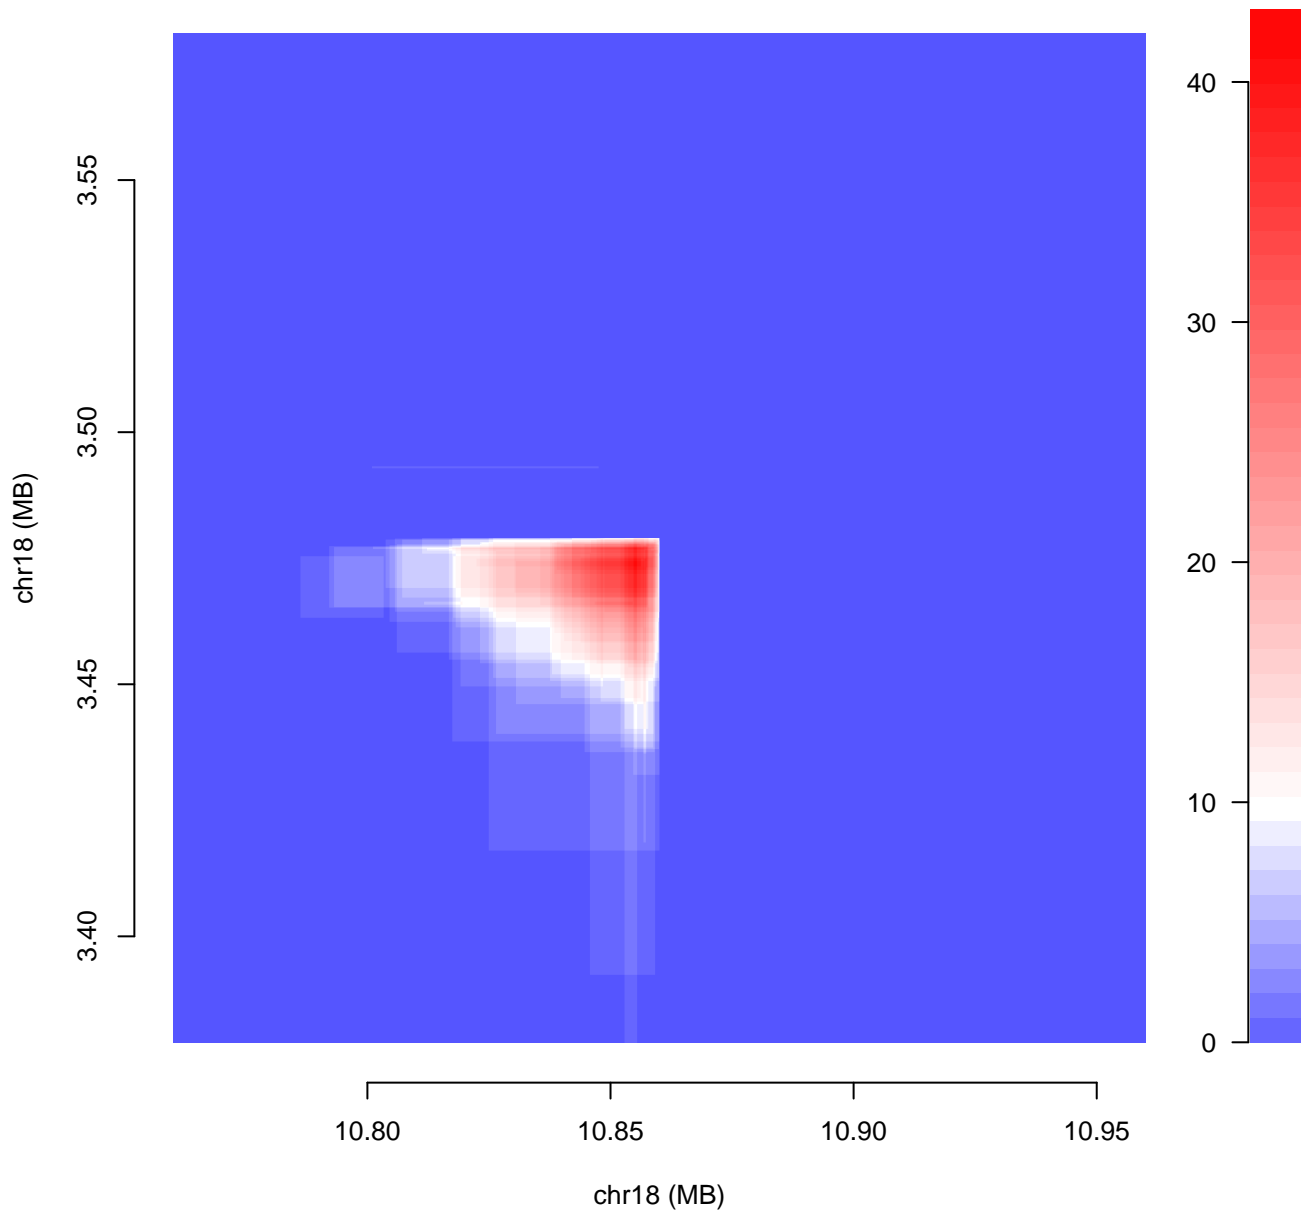

Supplement: Supplemental_Data.zip [file event_335.pdf › event_335.pdf]

Barcode

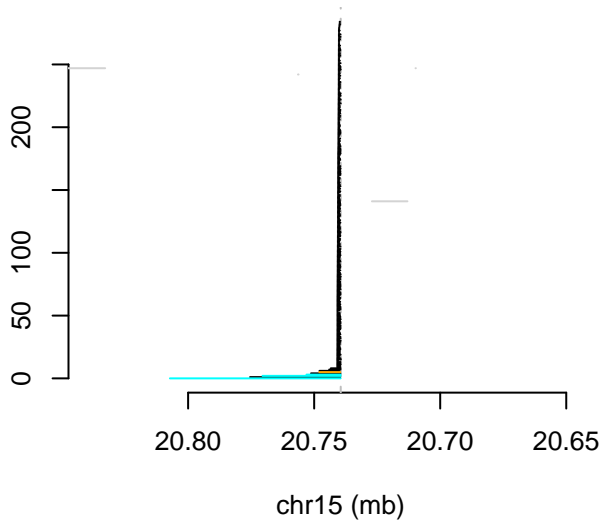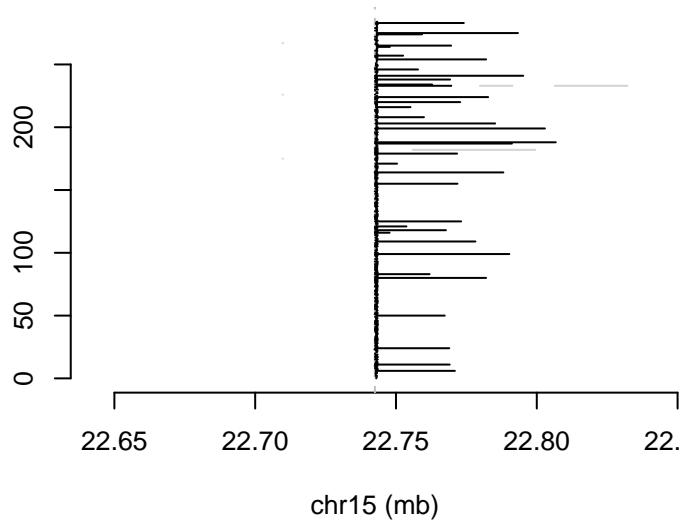

Copy number

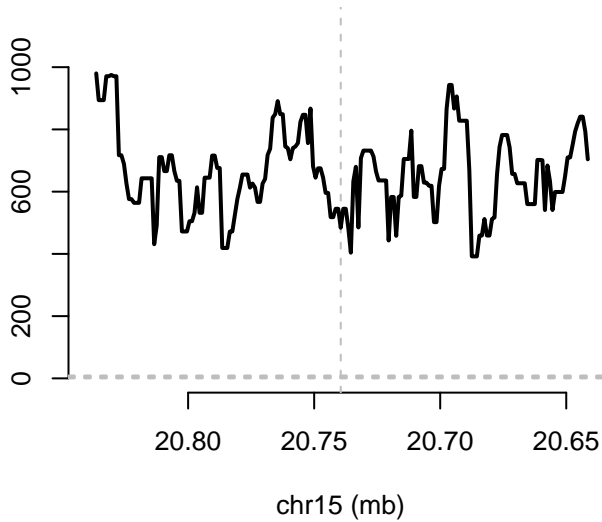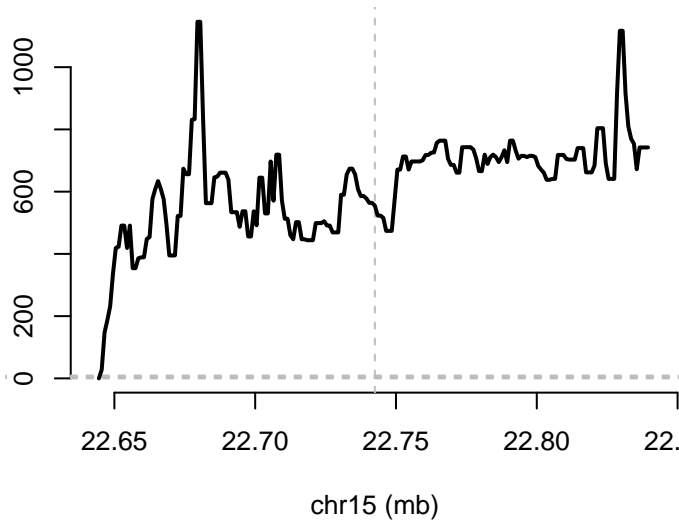

K562 chr15:22,742,505::chr15:20,739,458--

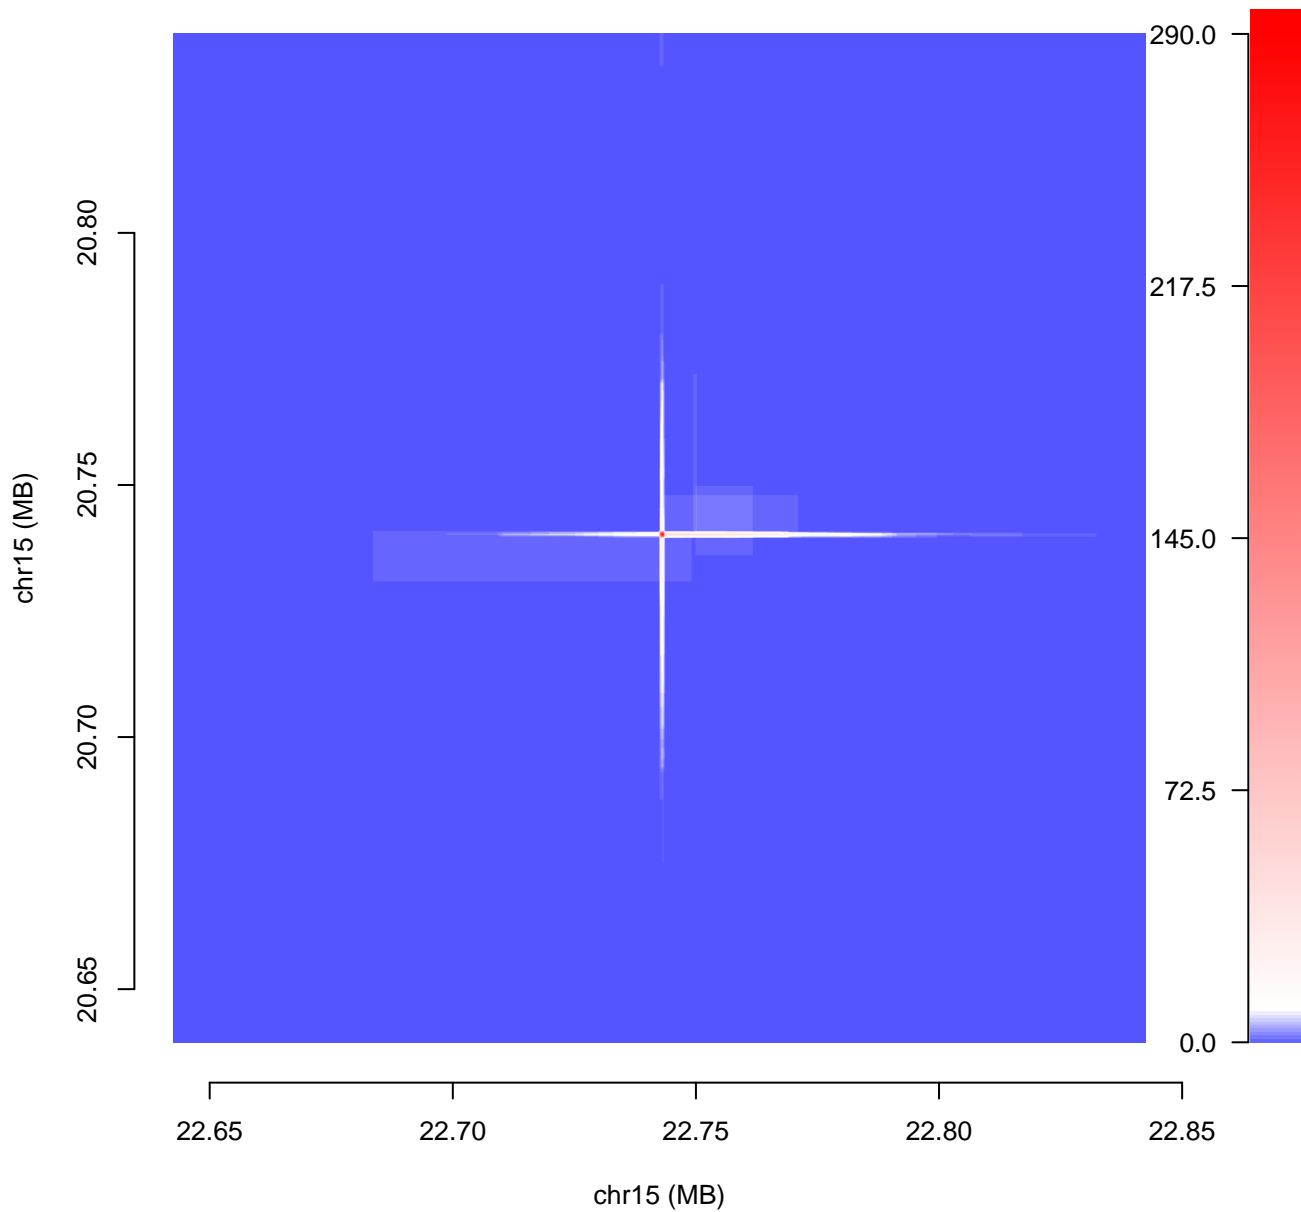

Supplement: Supplemental_Data.zip [file event_336.pdf › event_336.pdf]

Barcode

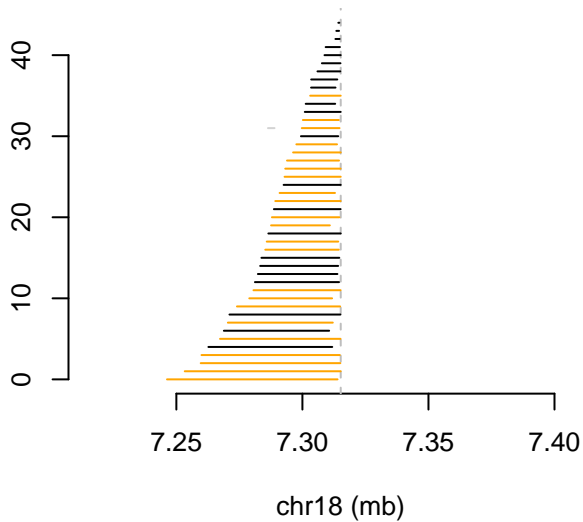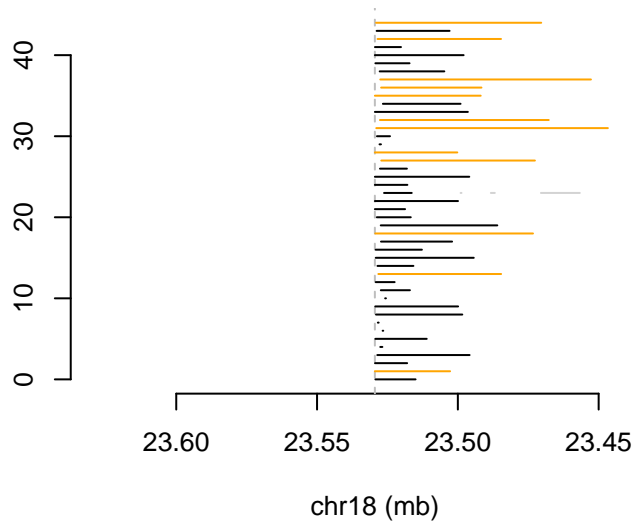

Copy number

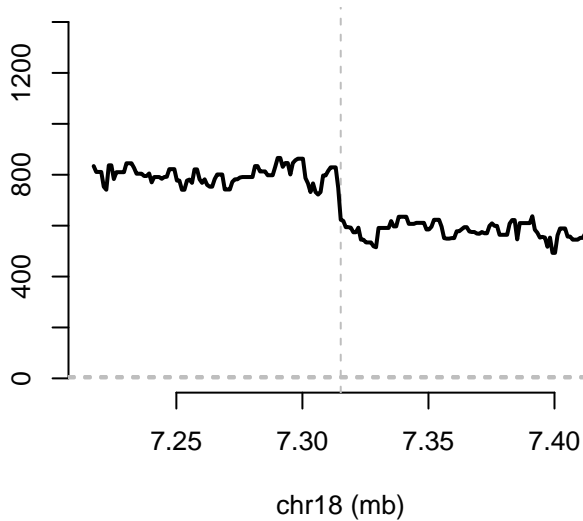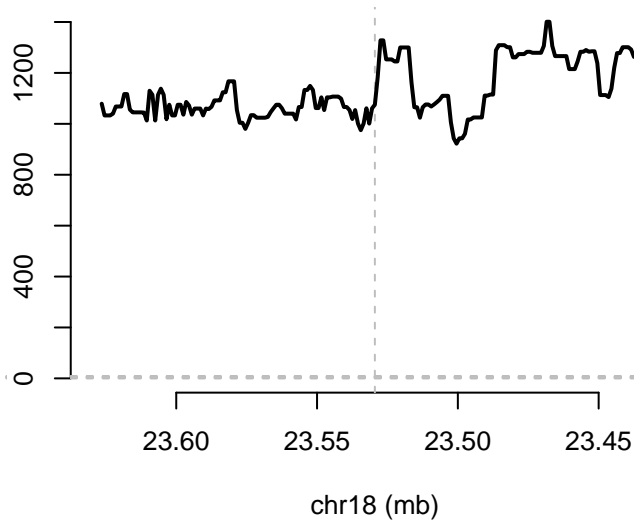

K562 chr18:7,315,204::chr18:23,529,465++

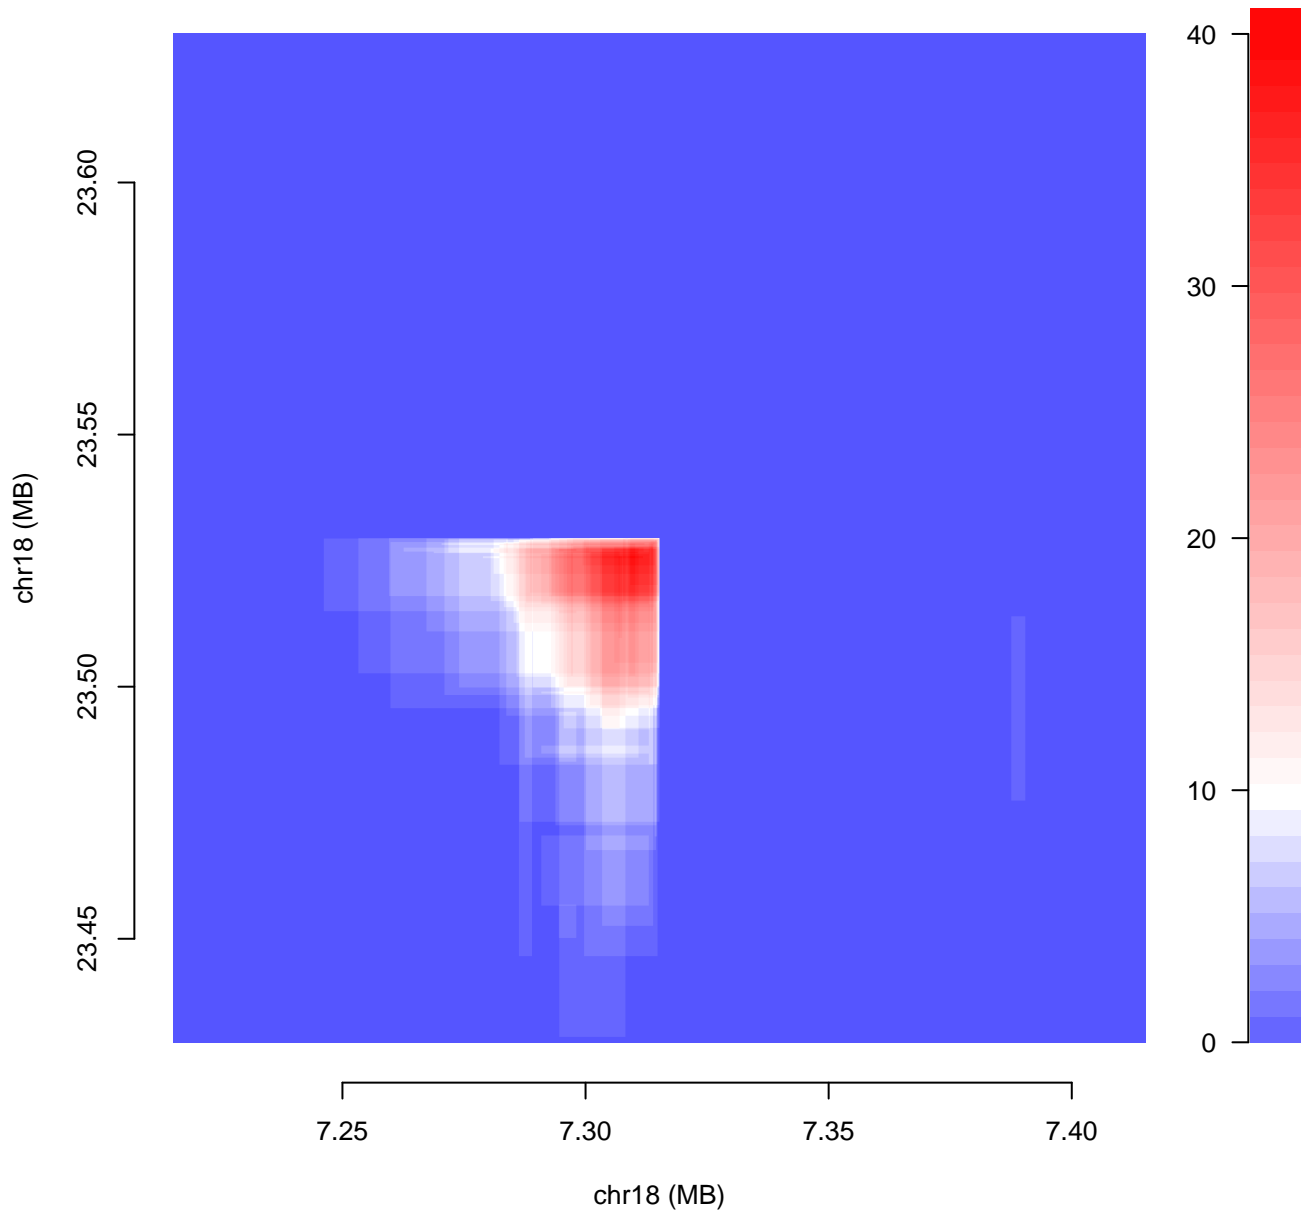

Supplement: Supplemental_Data.zip [file event_337.pdf › event_337.pdf]

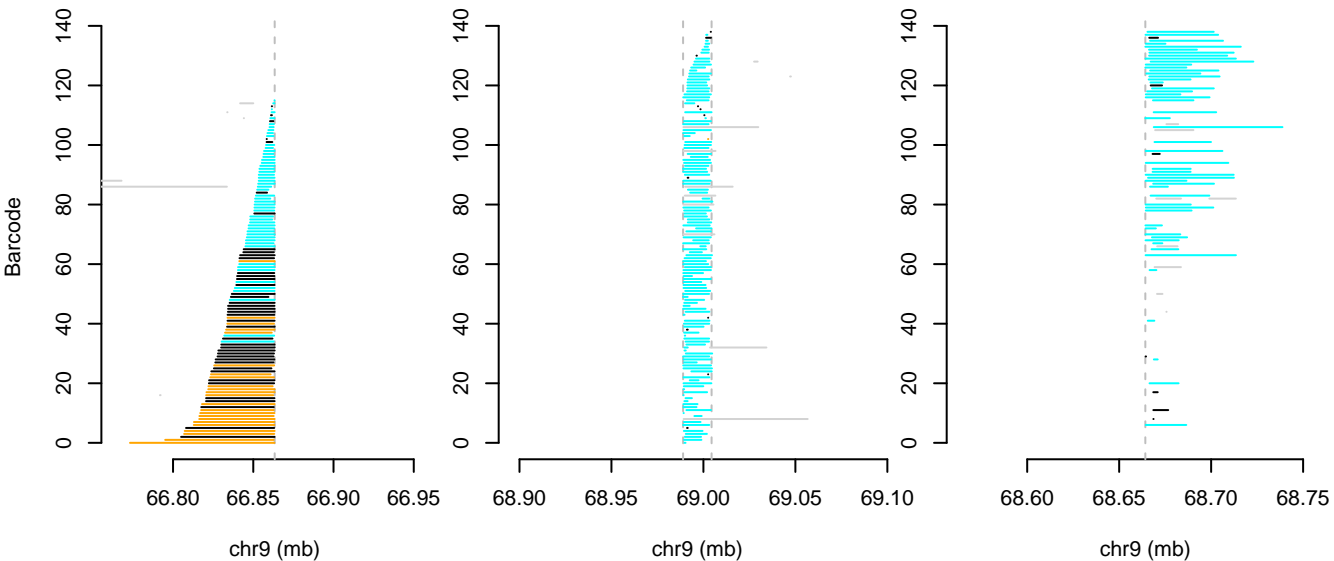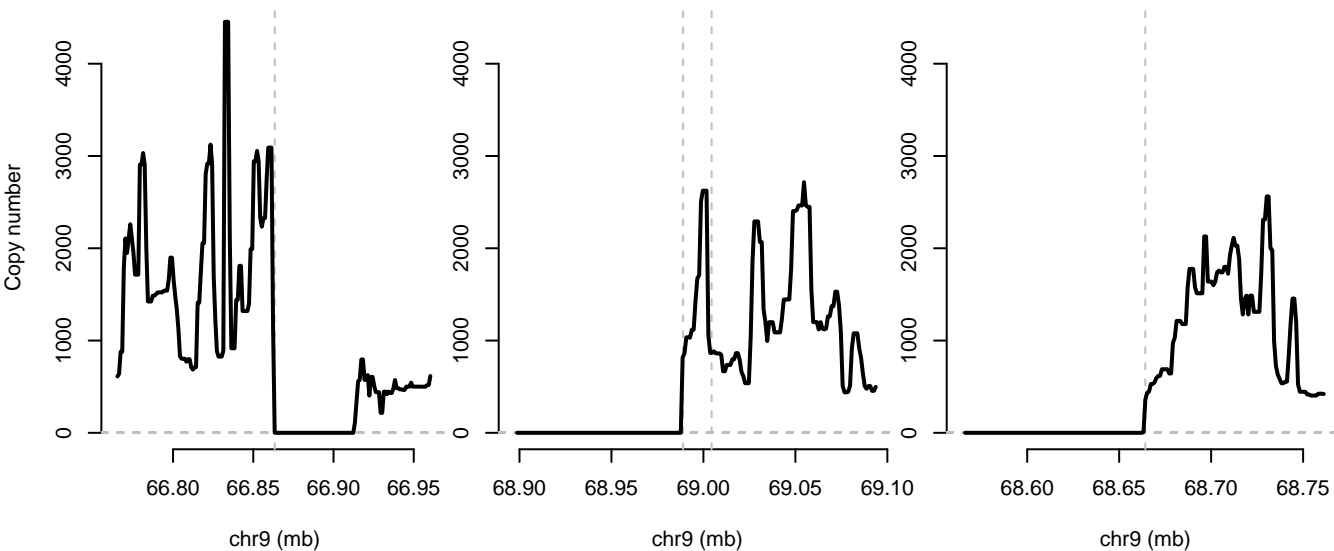

K562 chr9:66,863,343::chr9:68,988,945+-

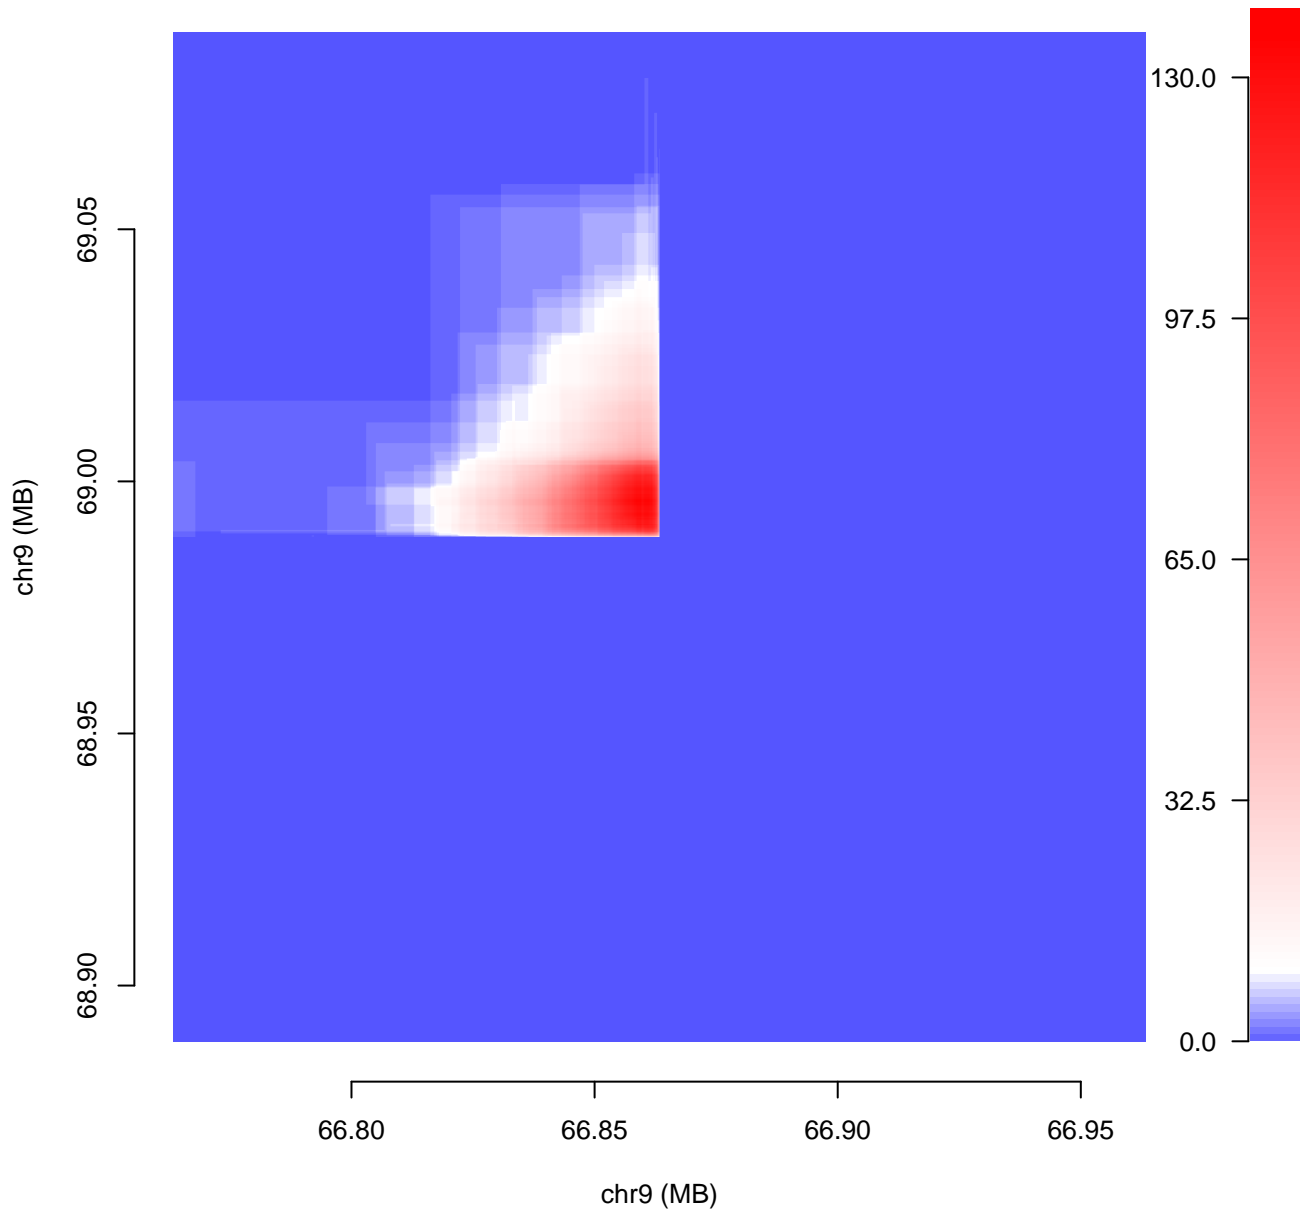

K562 chr9:68,988,945::chr9:69,004,445-+

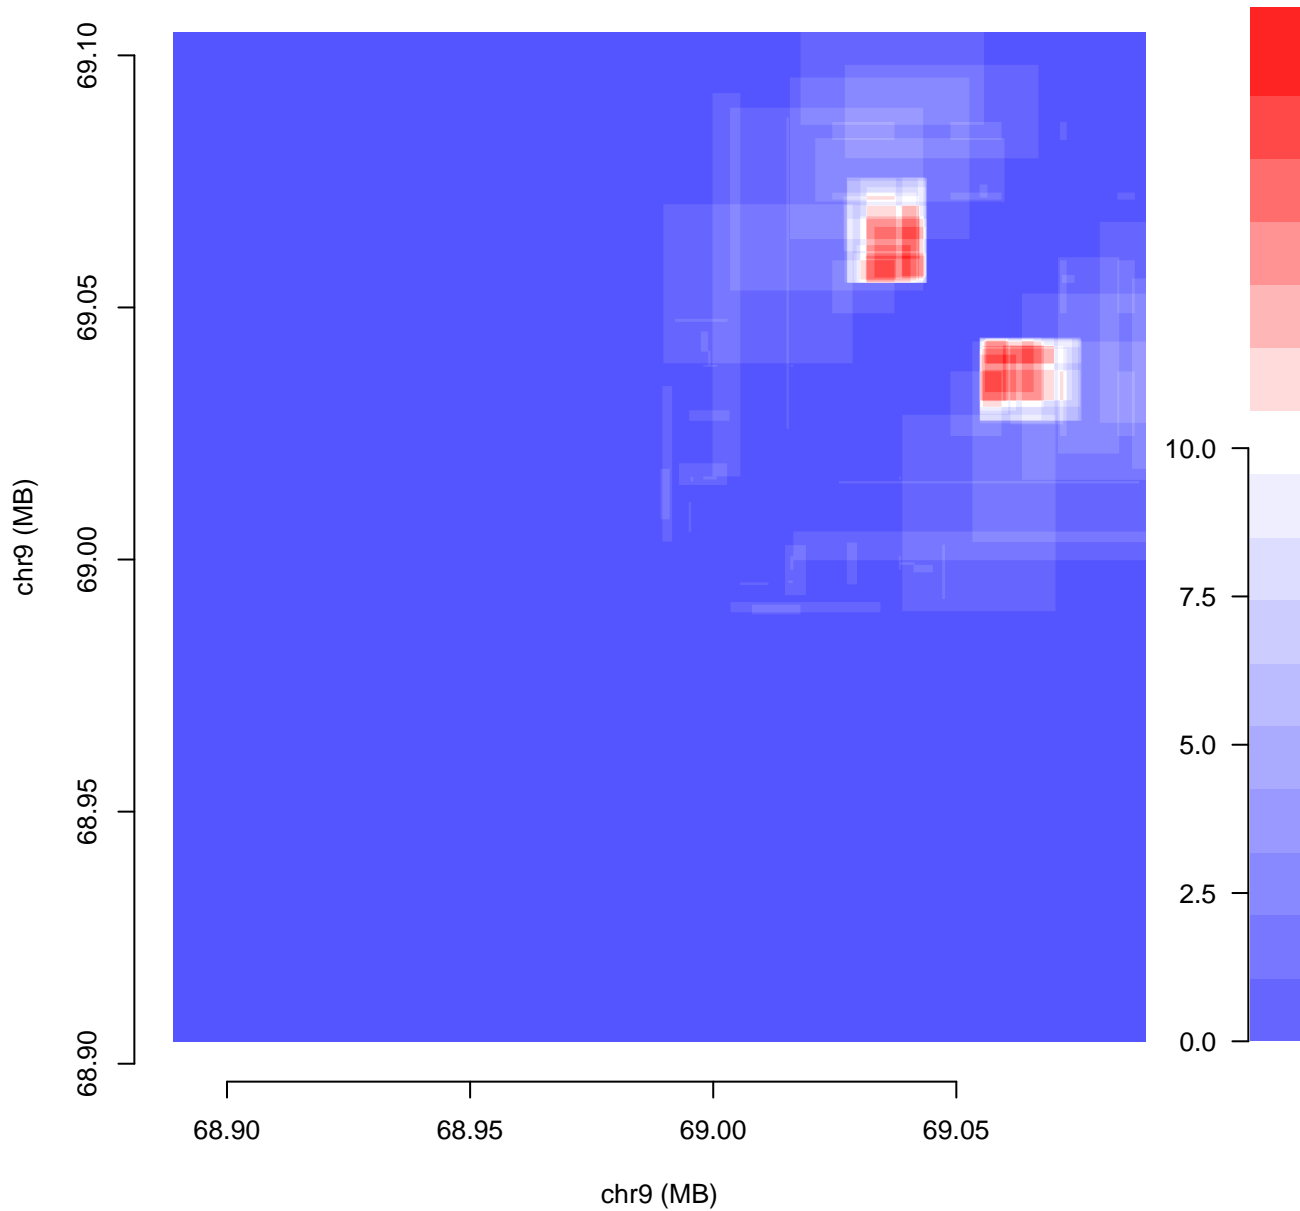

K562 chr9:68,664,224::chr9:69,004,445-+

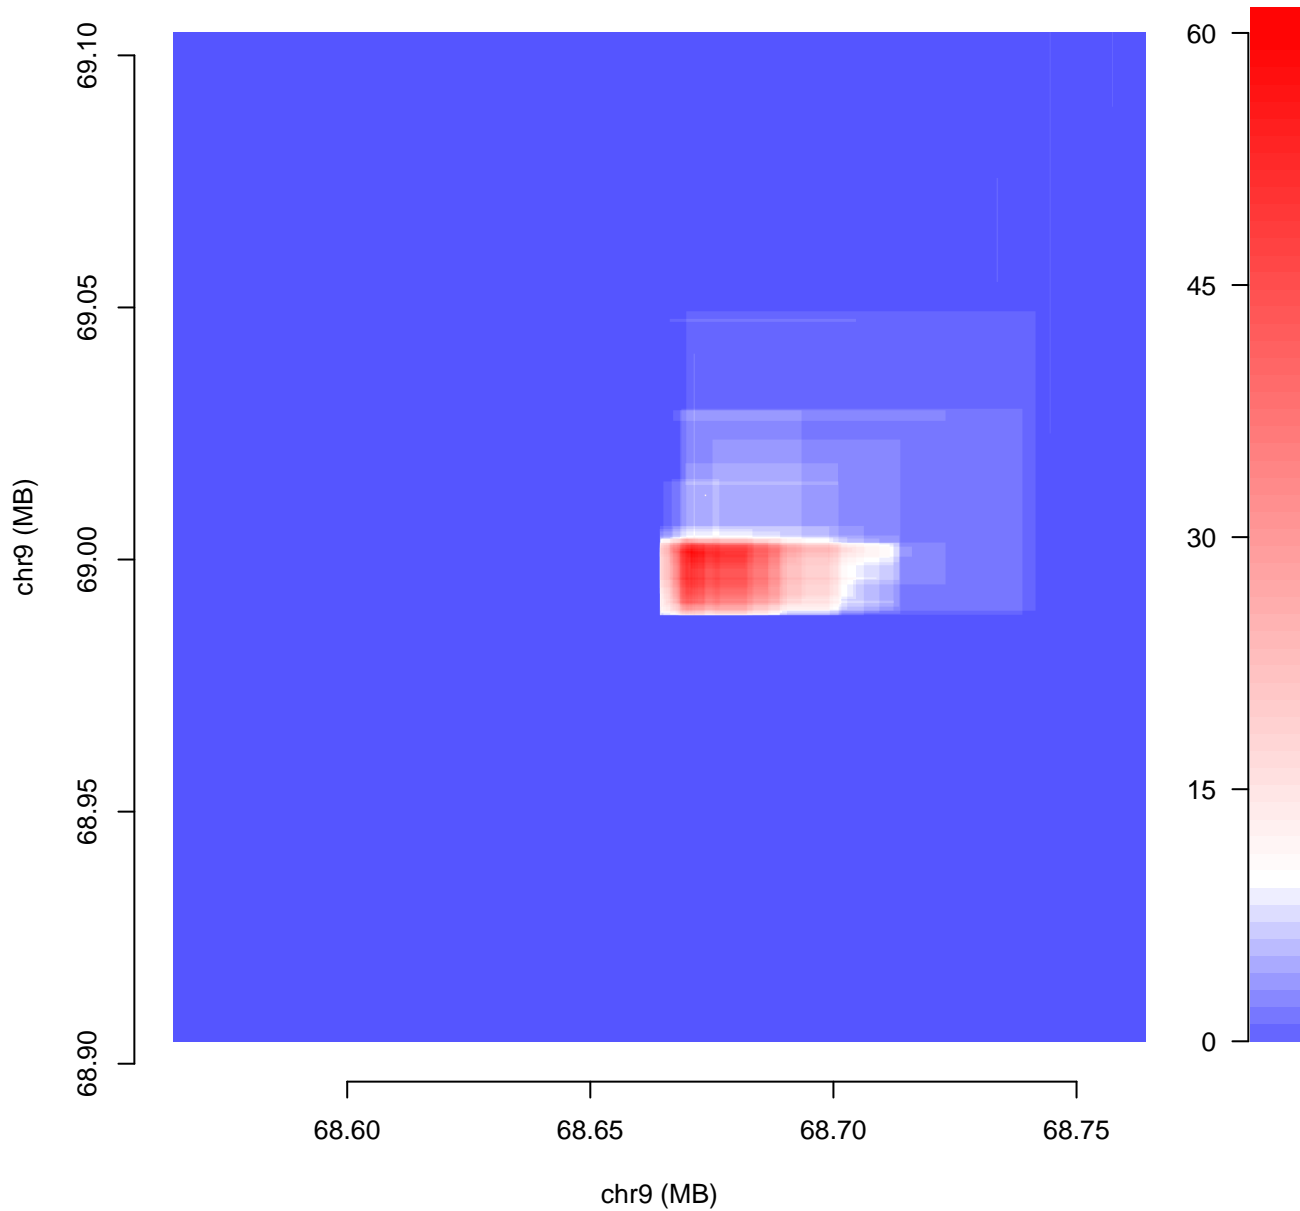

Supplement: Supplemental_Data.zip [file event_338.pdf › event_338.pdf]

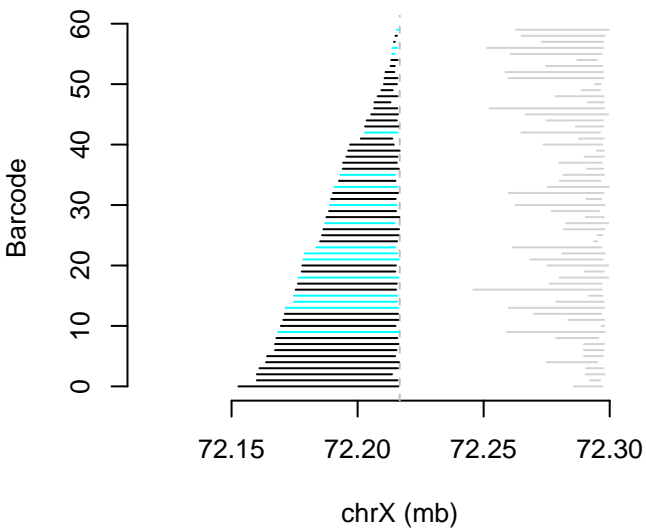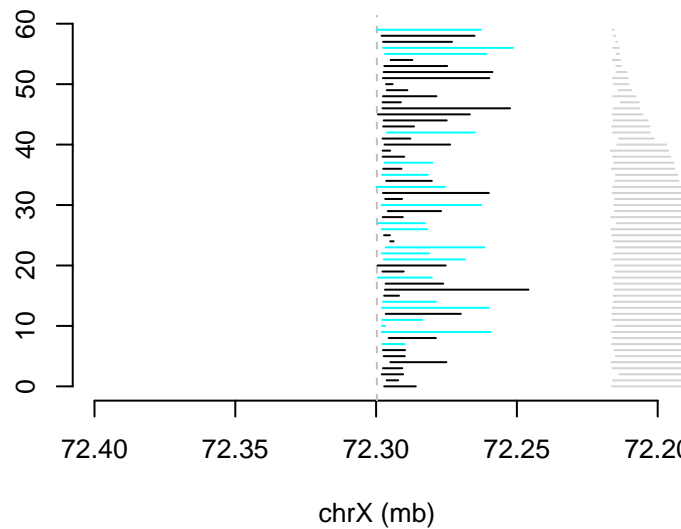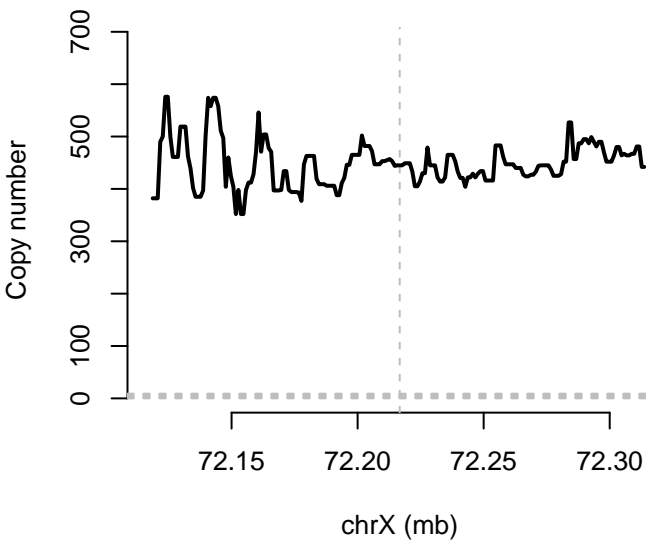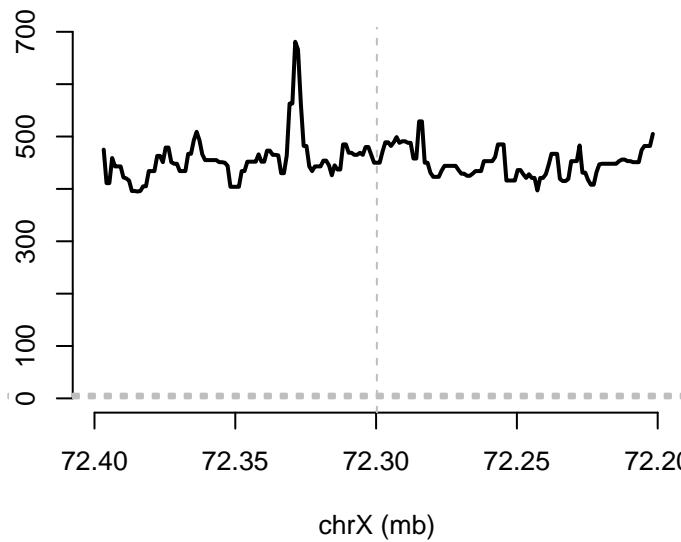

K562 chrX:72,216,710::chrX:72,299,719++

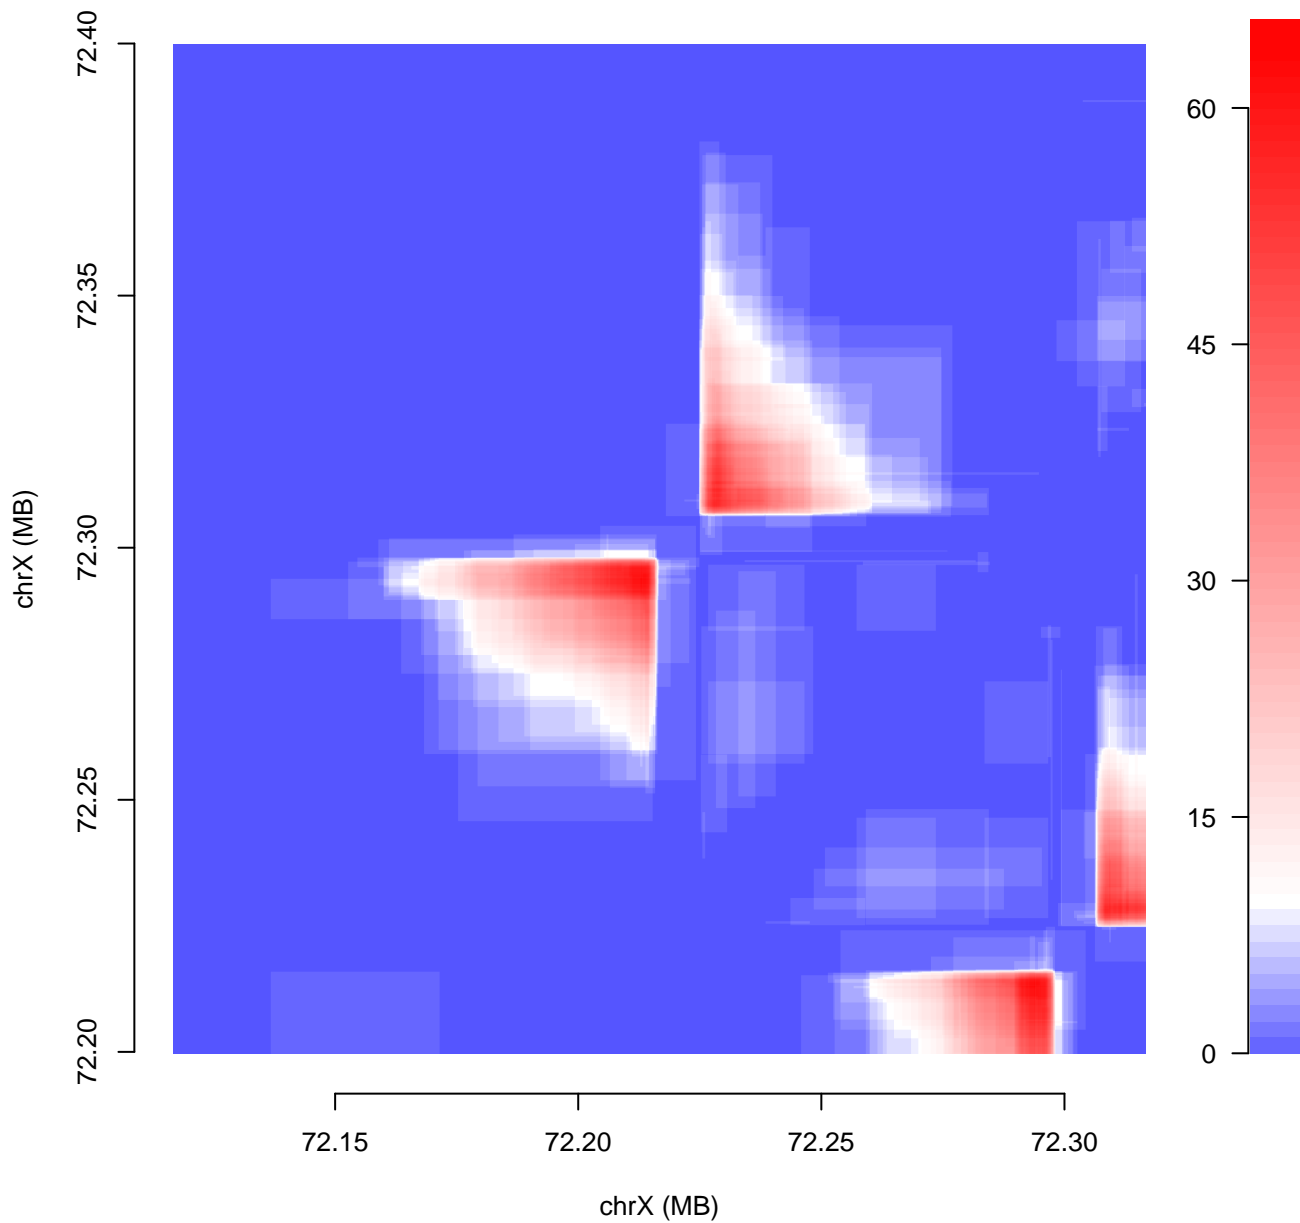

Supplement: Supplemental_Data.zip [file event_339.pdf › event_339.pdf]

Barcode

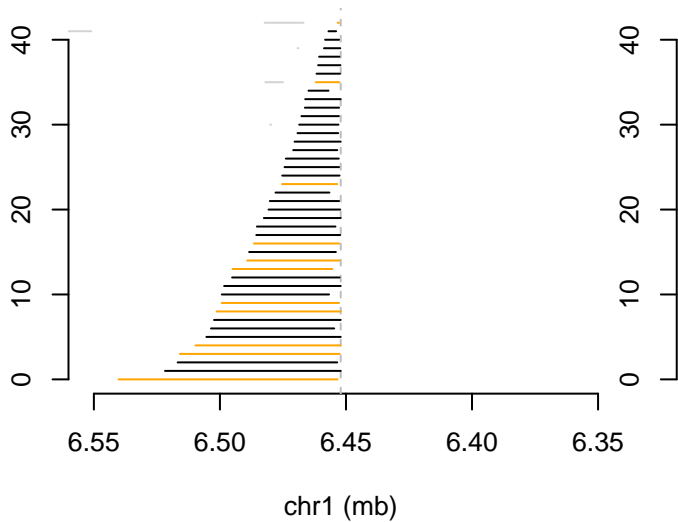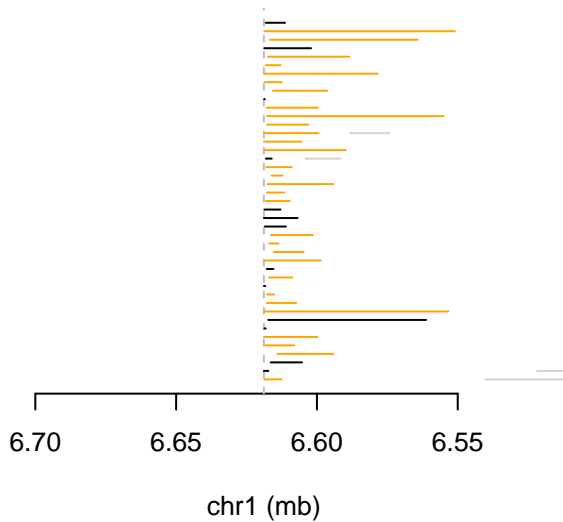

Copy number

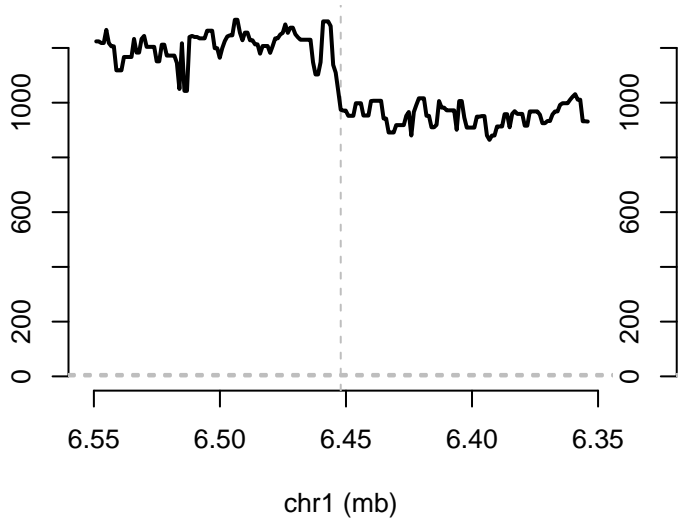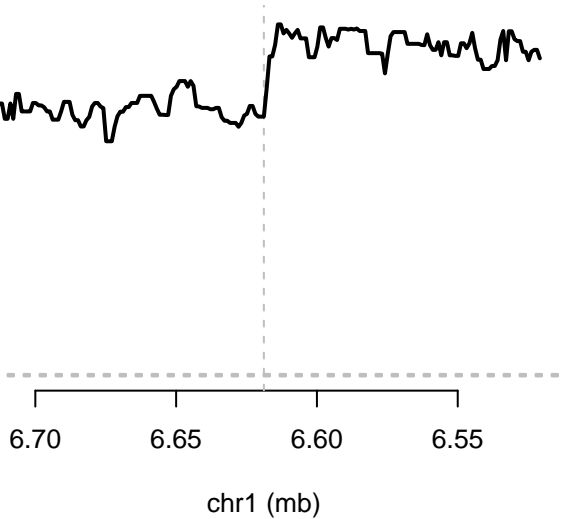

K562 chr1:6,452,077::chr1:6,618,841-+

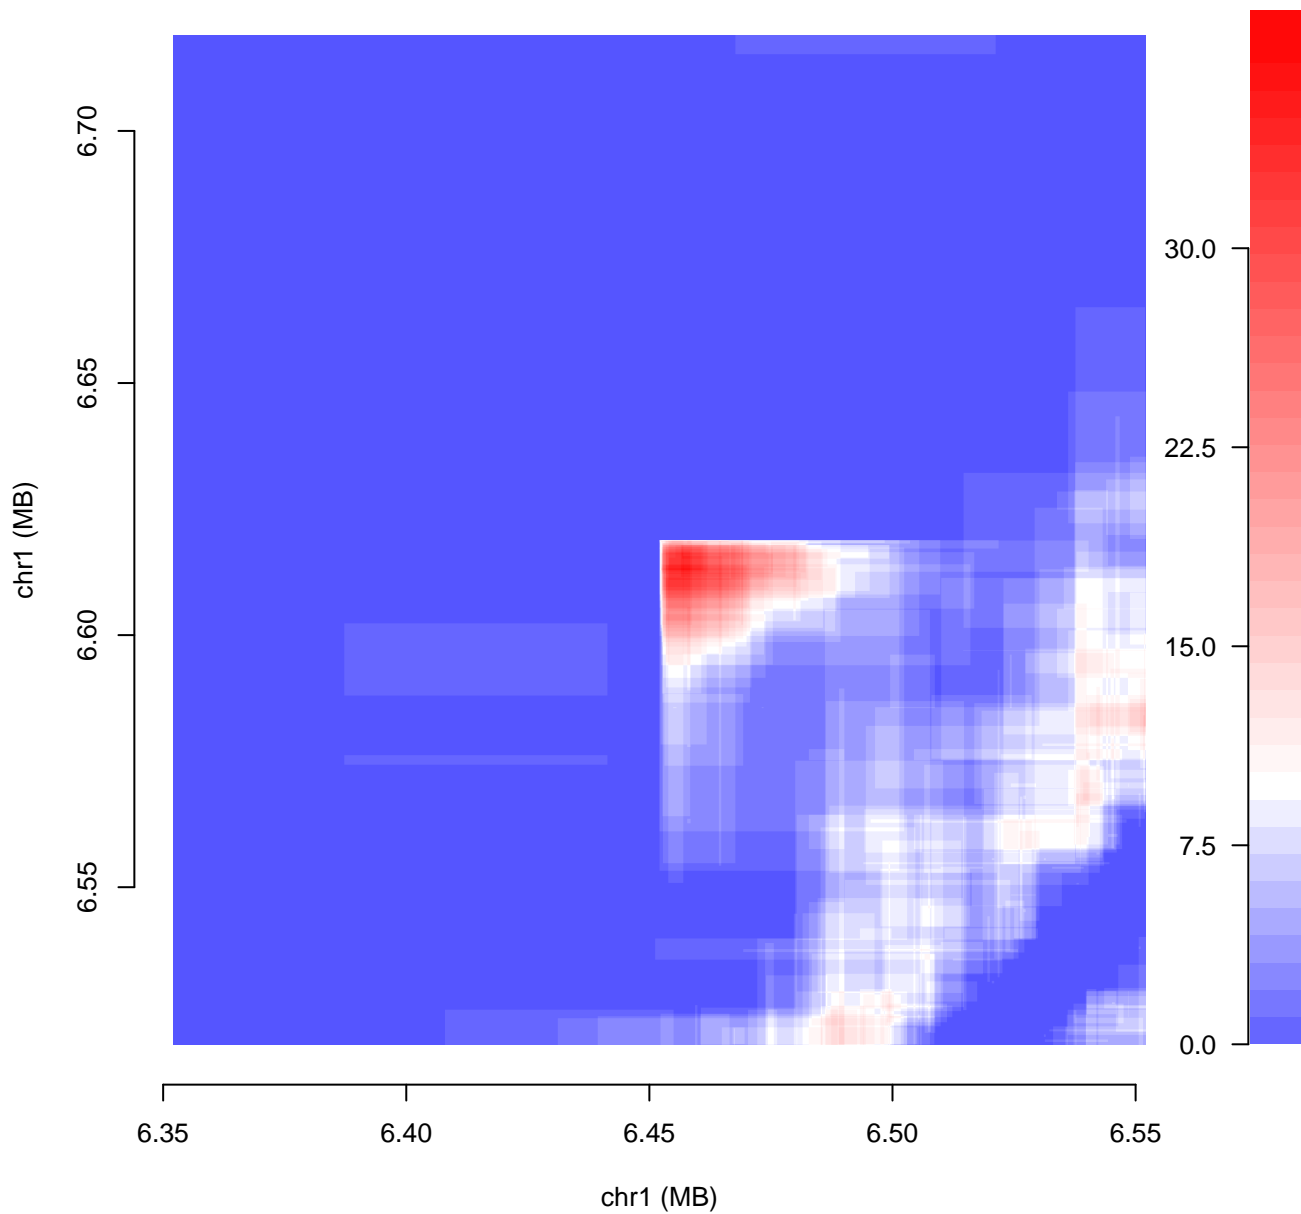

Supplement: Supplemental_Data.zip [file event_34.pdf › event_34.pdf]

Barcode

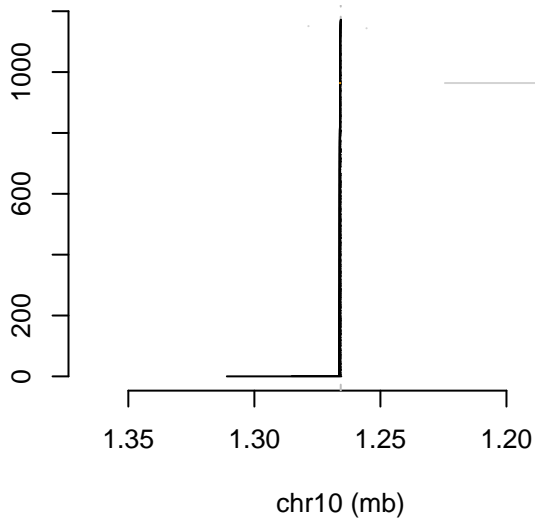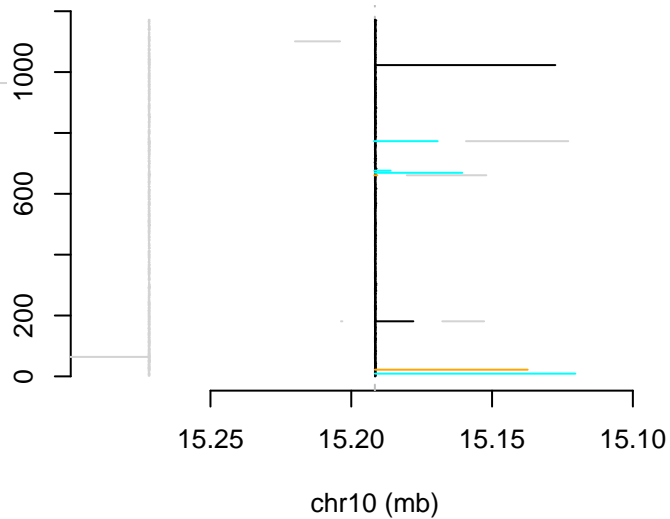

Copy number

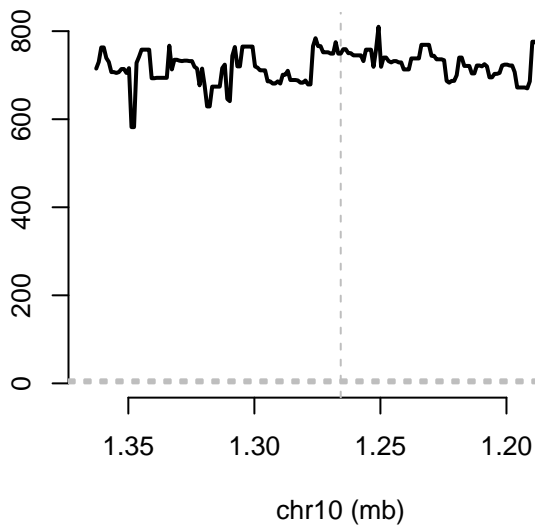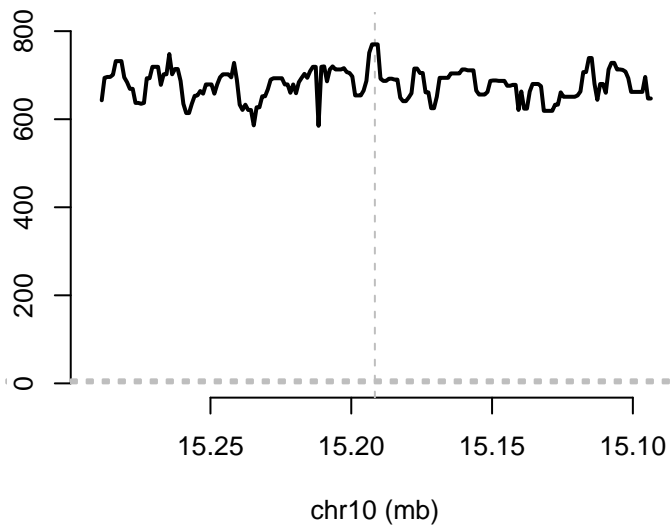

K562 chr10:1,265,741::chr10:15,191,619-+

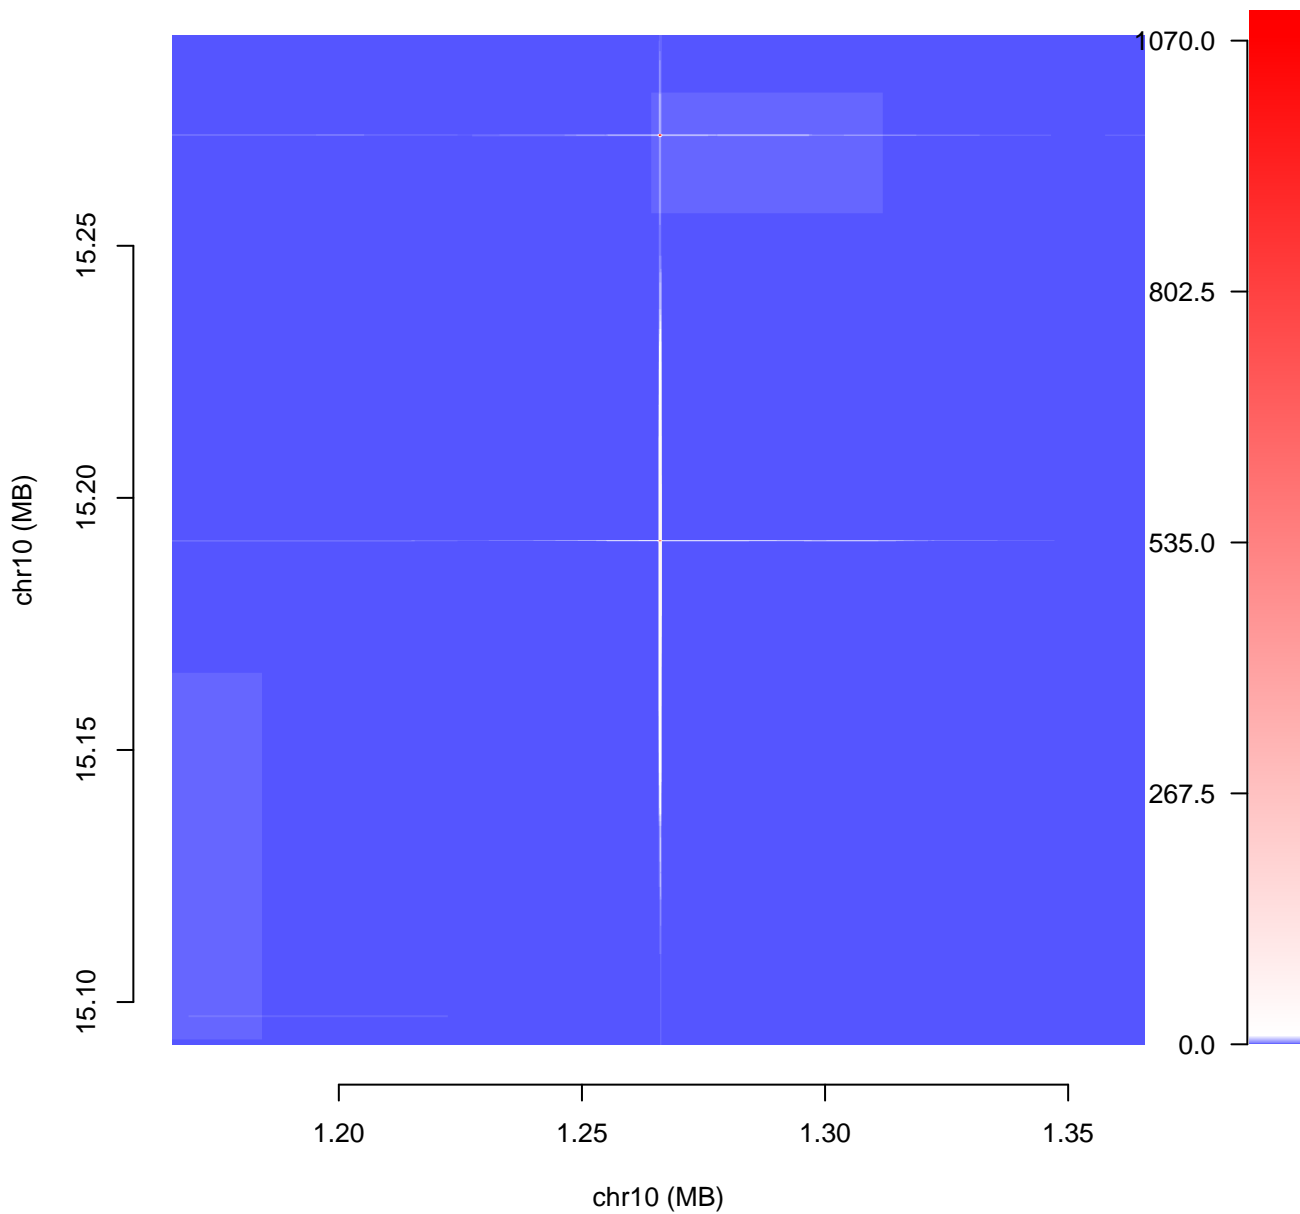

Supplement: Supplemental_Data.zip [file event_340.pdf › event_340.pdf]

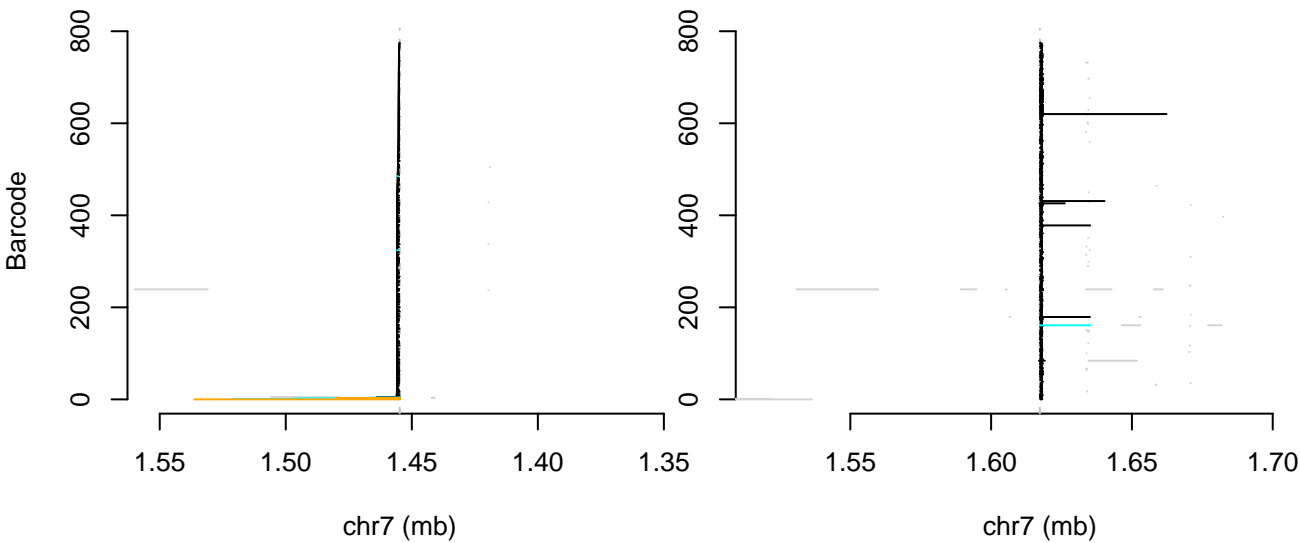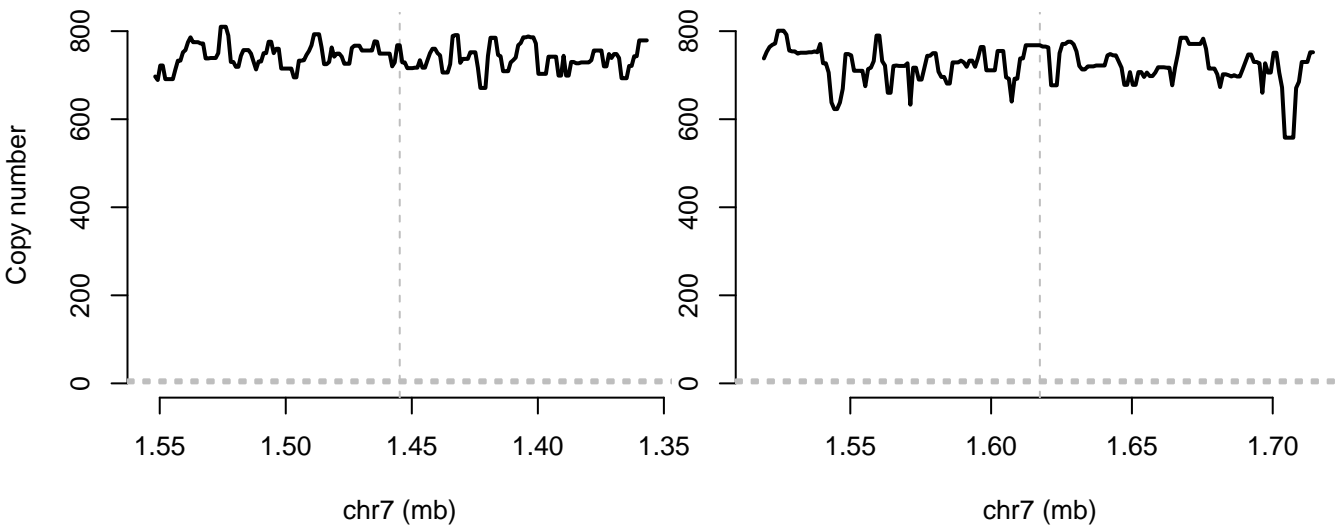

K562 chr7:1,454,788::chr7:1,617,313--

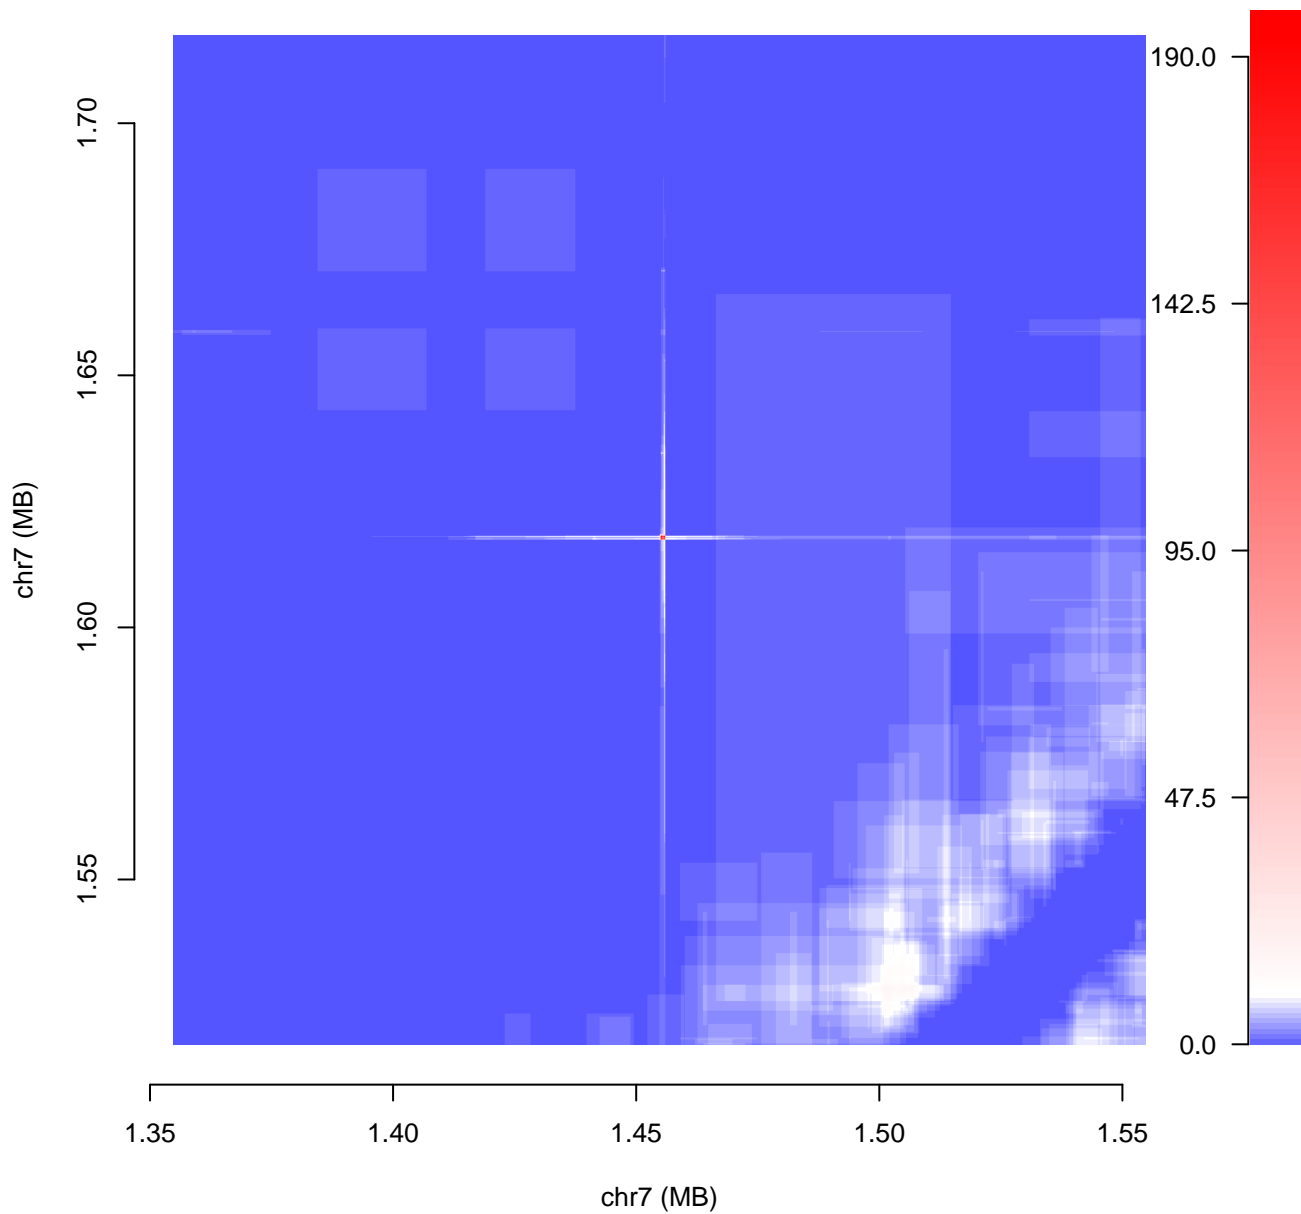

Supplement: Supplemental_Data.zip [file event_341.pdf › event_341.pdf]

Barcode

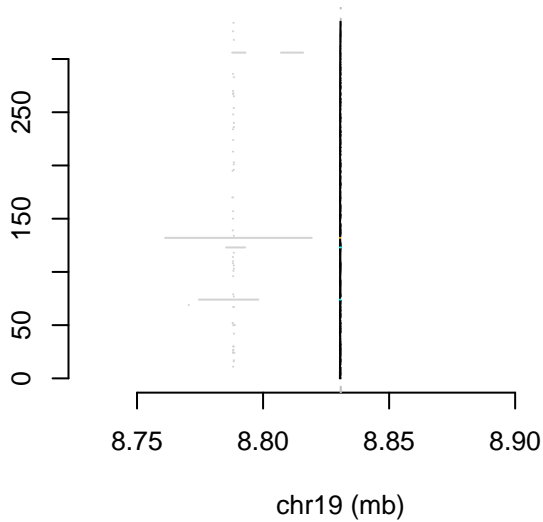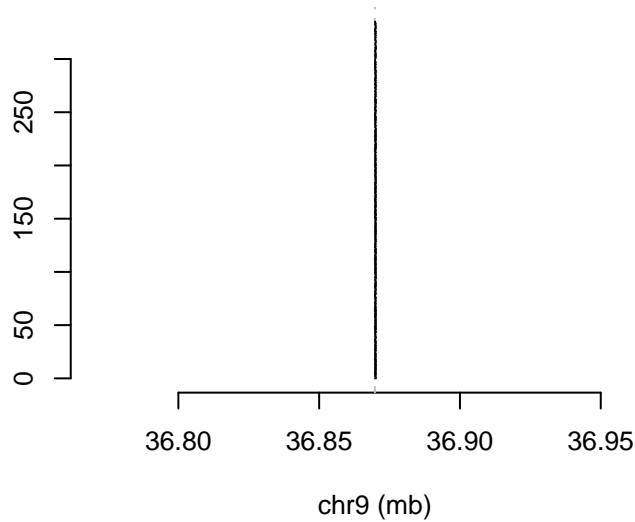

Copy number

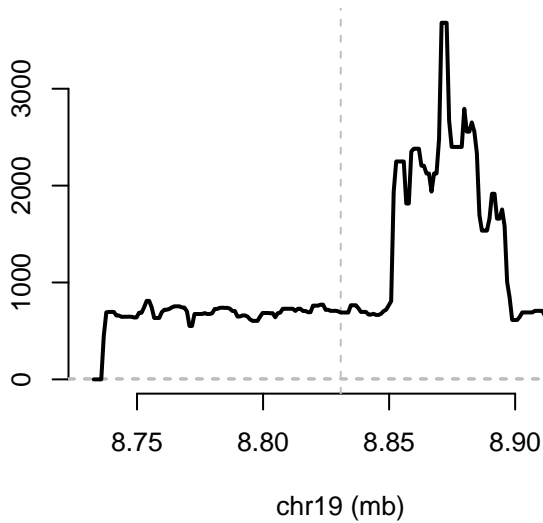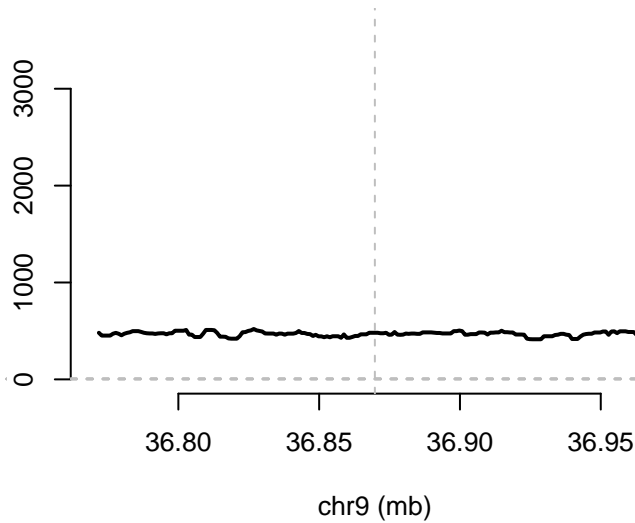

K562 chr19:8,830,807::chr9:36,869,781+-

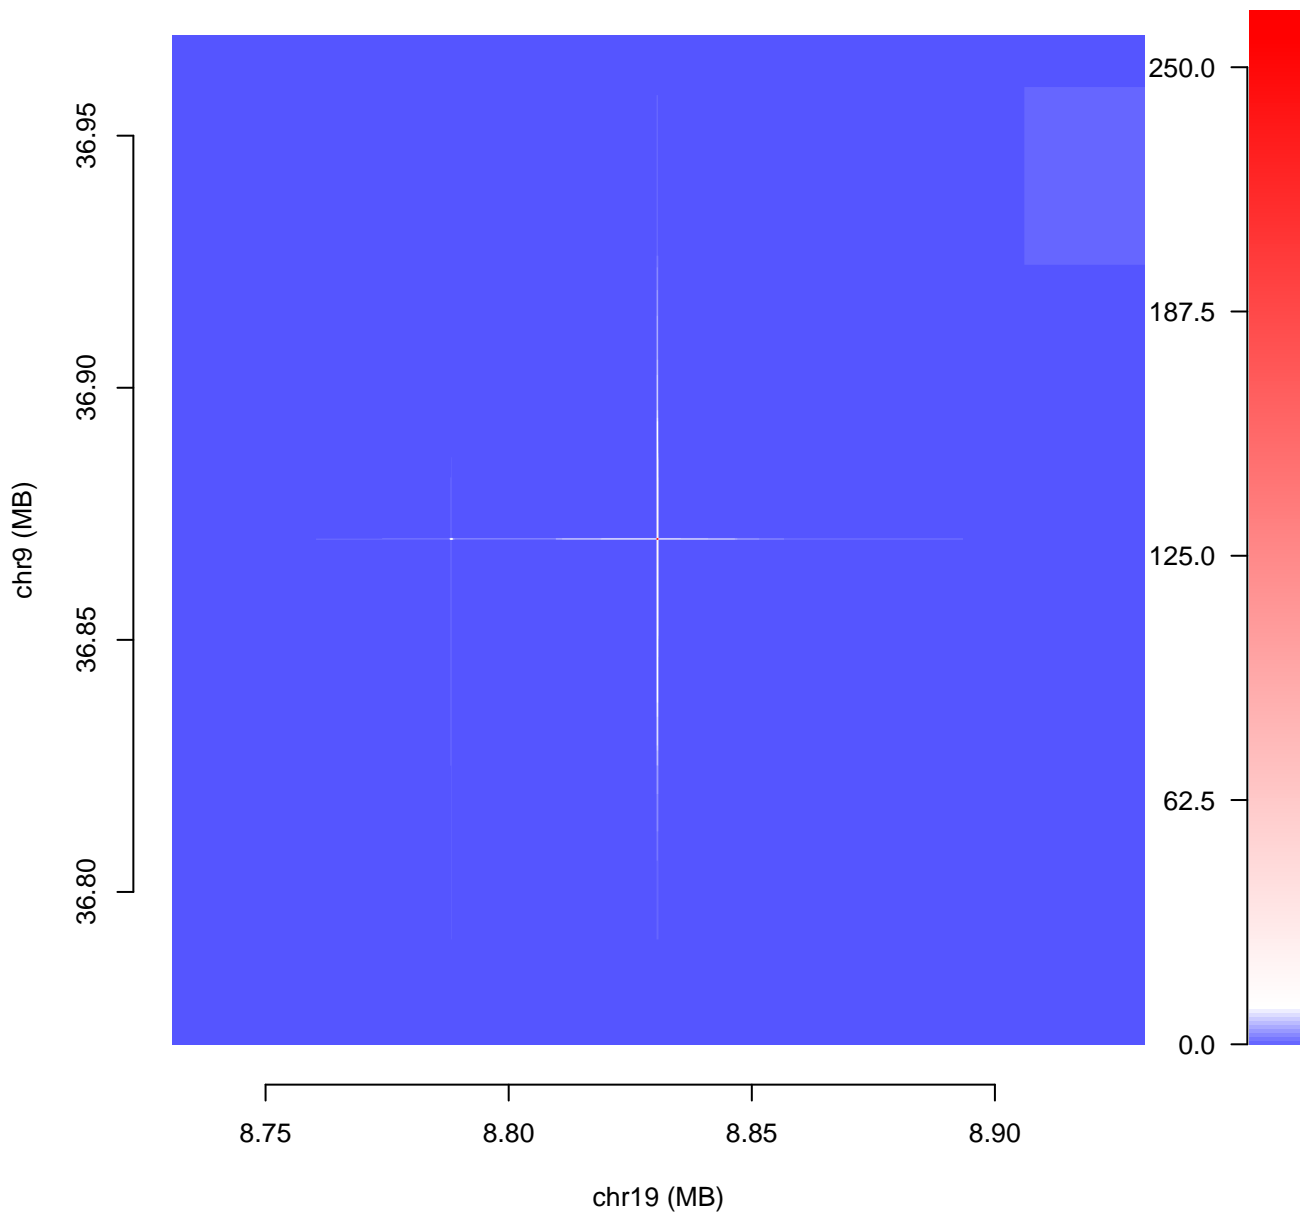

Supplement: Supplemental_Data.zip [file event_342.pdf › event_342.pdf]

Barcode

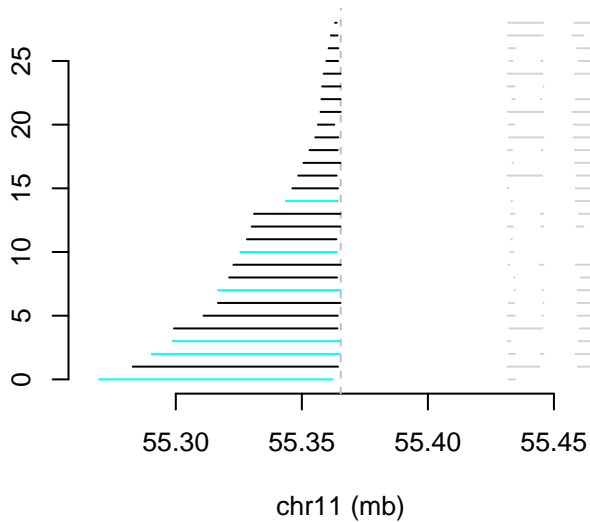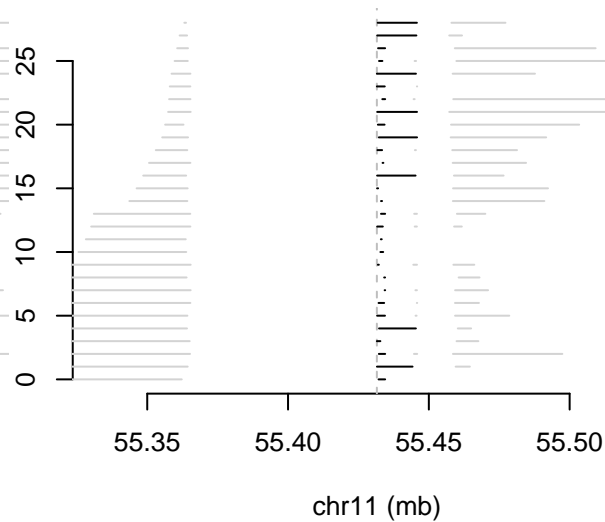

Copy number

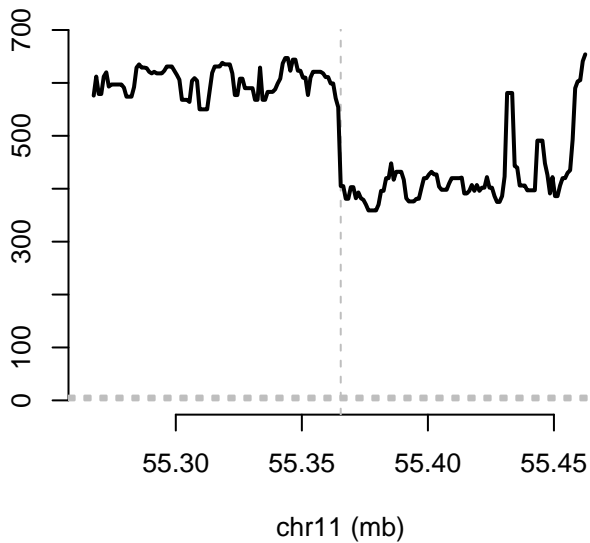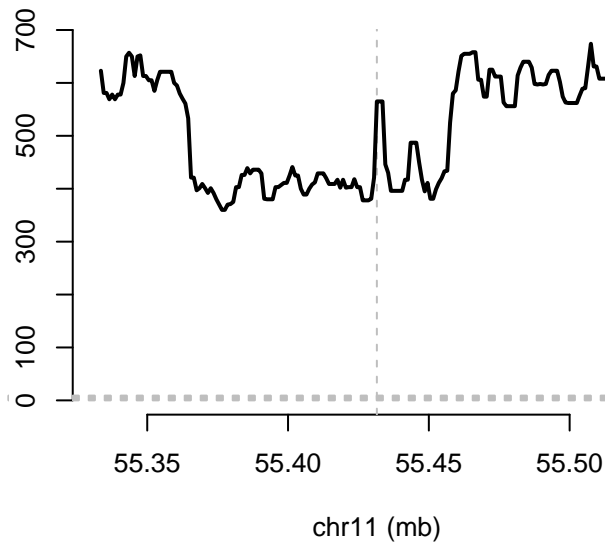

K562 chr11:55,431,549::chr11:55,365,428-+

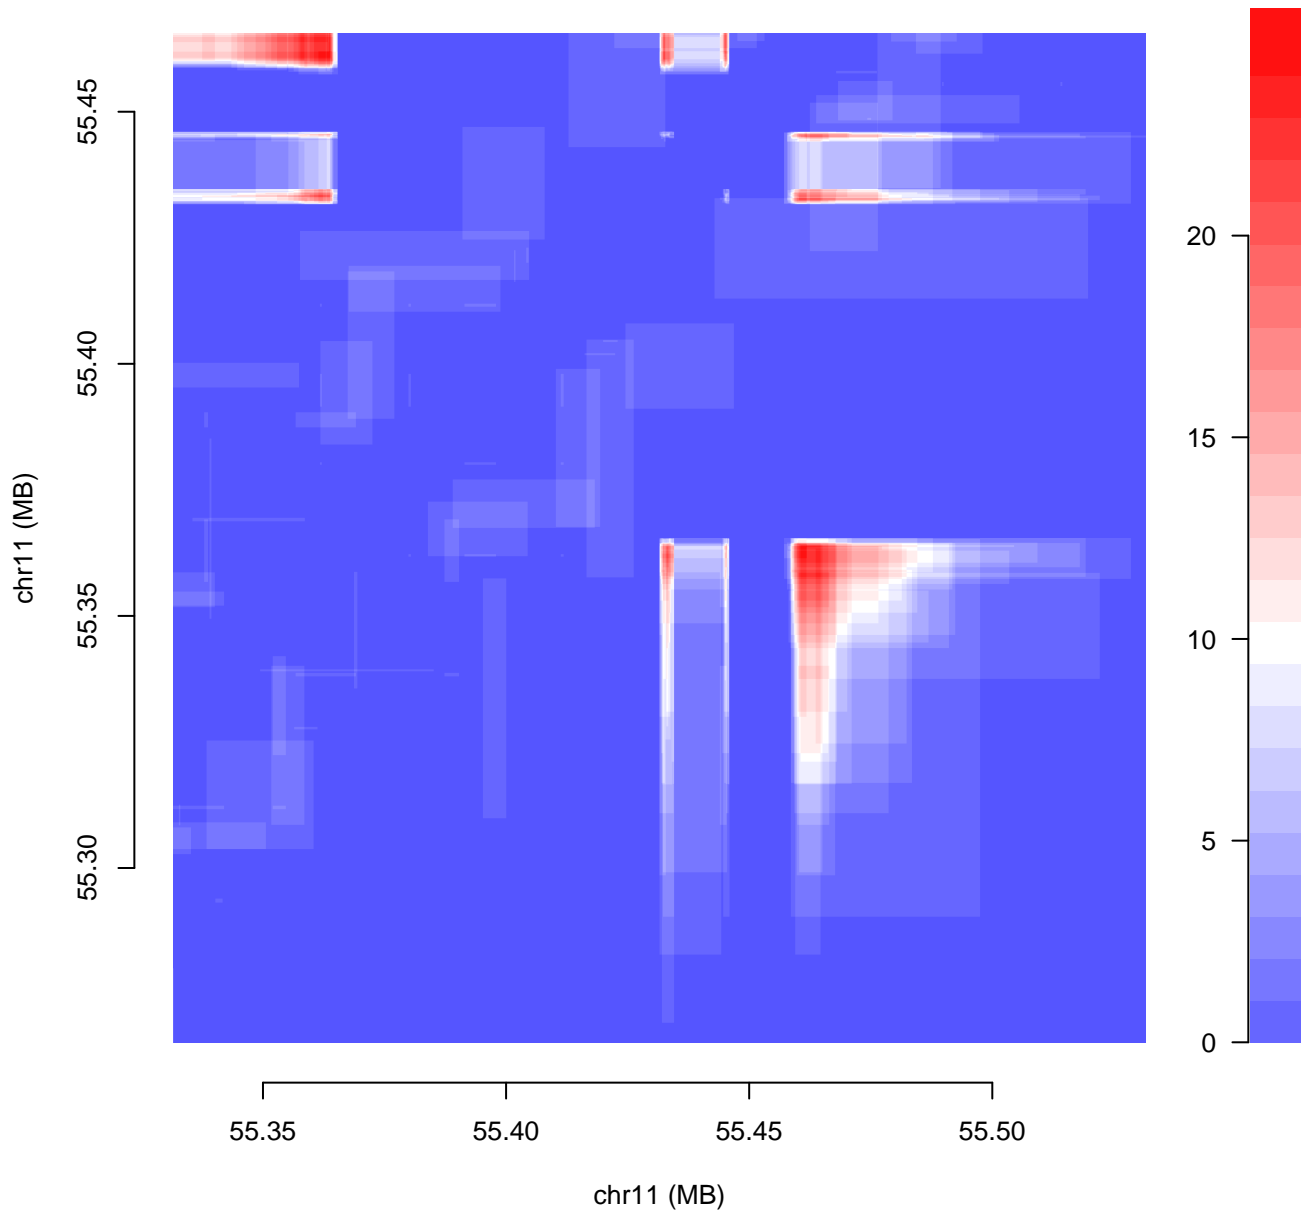

Supplement: Supplemental_Data.zip [file event_343.pdf › event_343.pdf]

Barcode

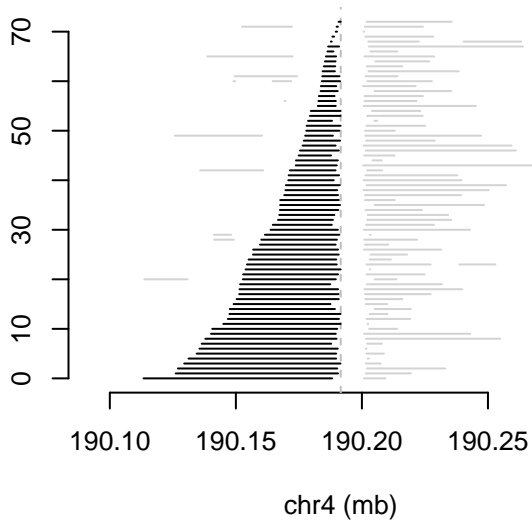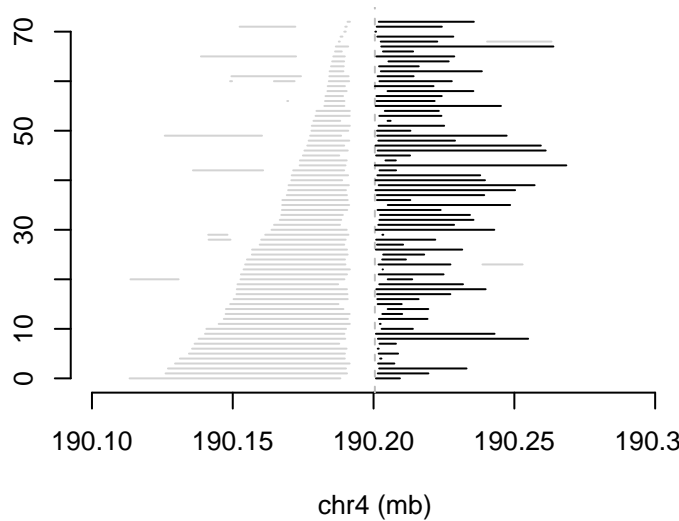

Copy number

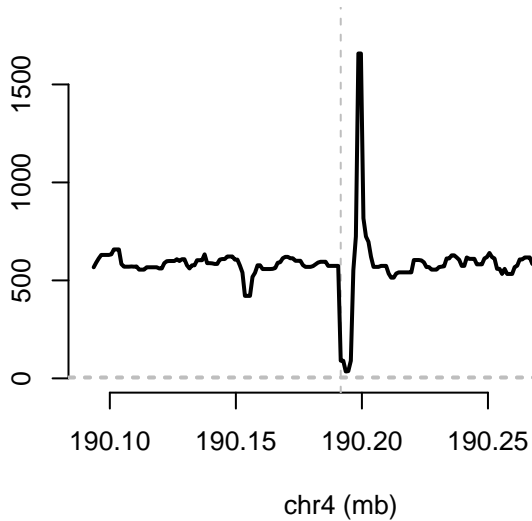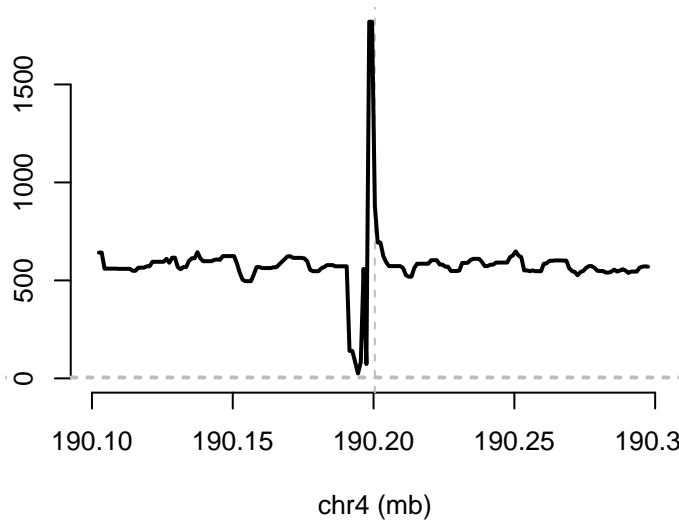

K562 chr4:190,200,462::chr4:190,191,603-+

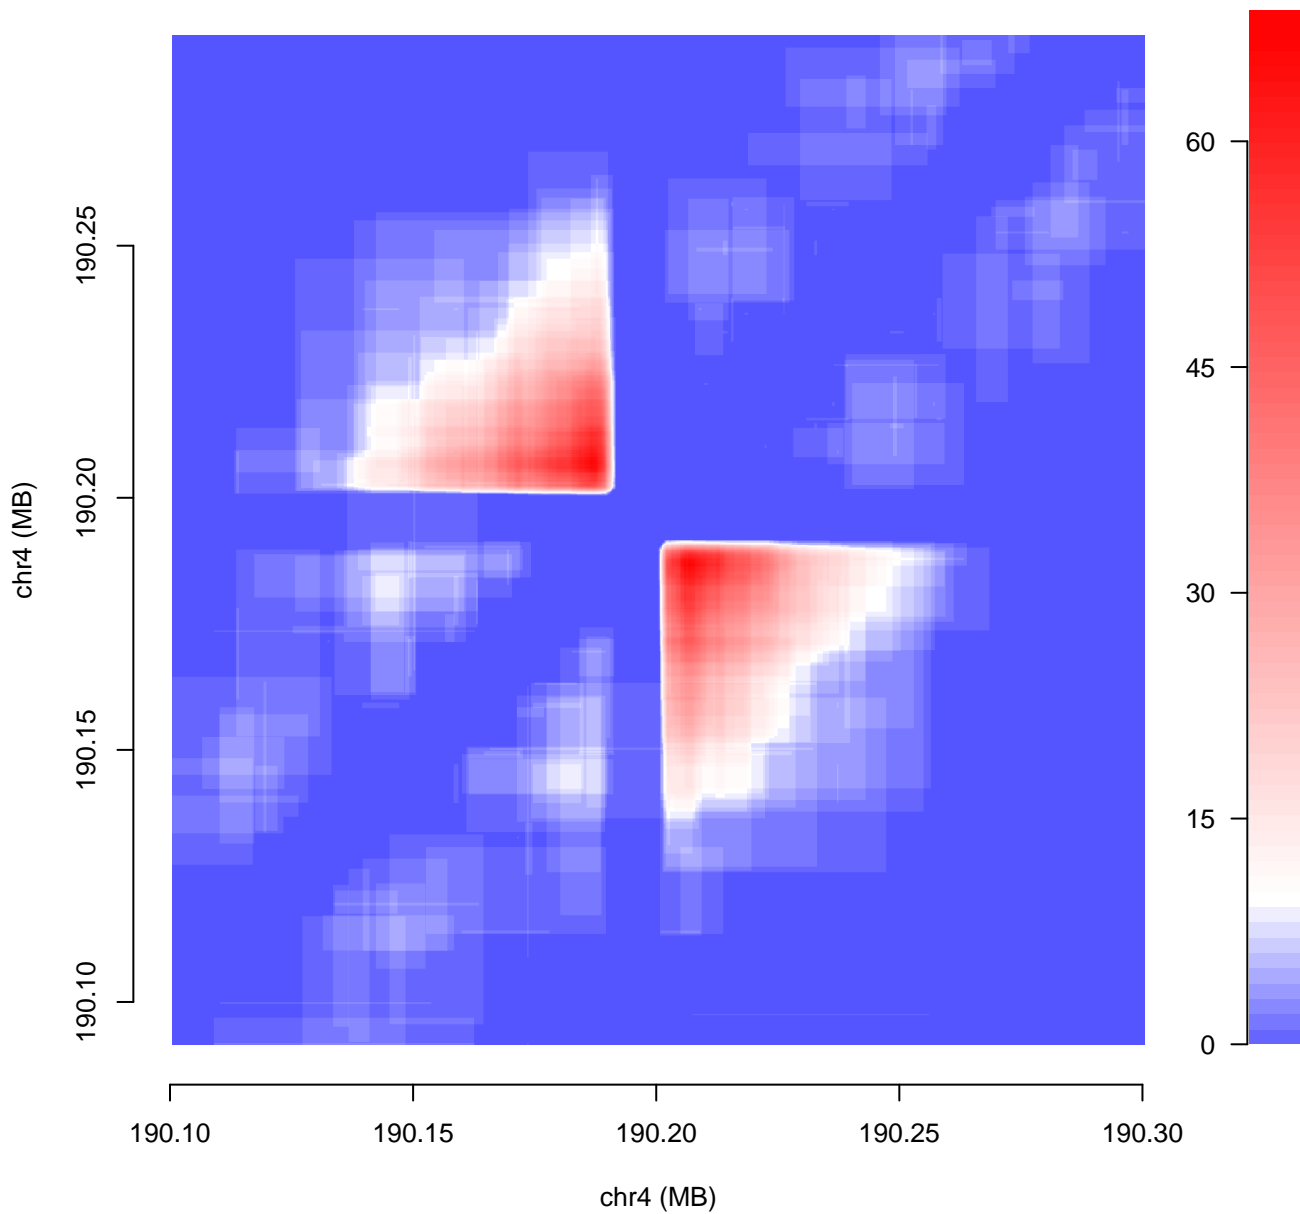

Supplement: Supplemental_Data.zip [file event_344.pdf › event_344.pdf]

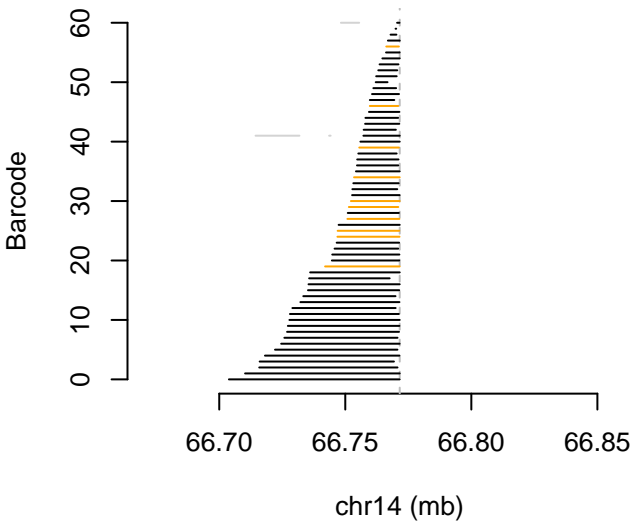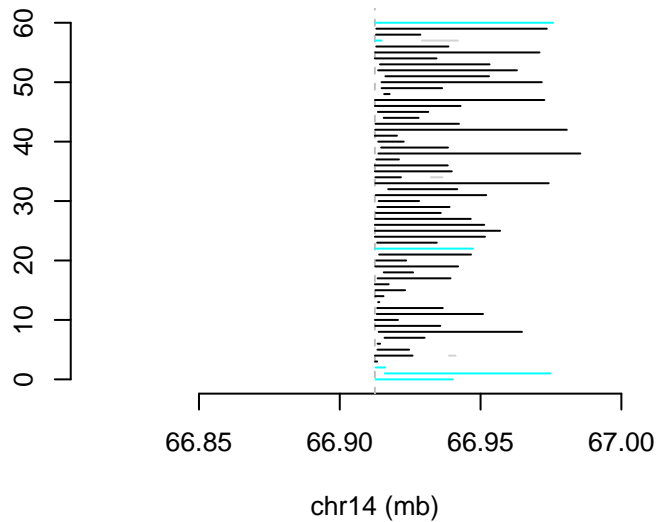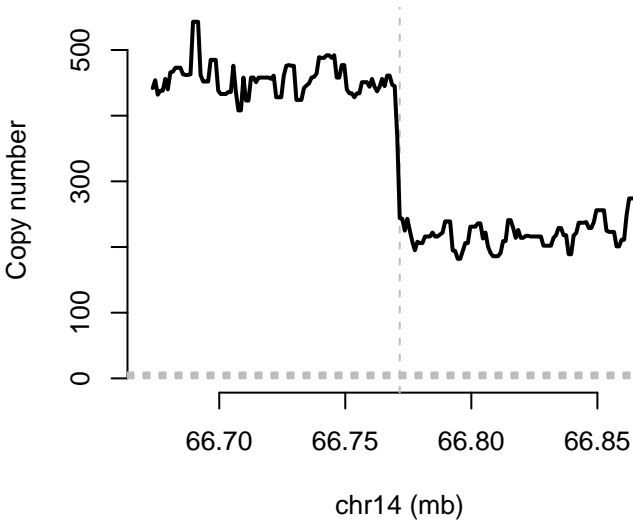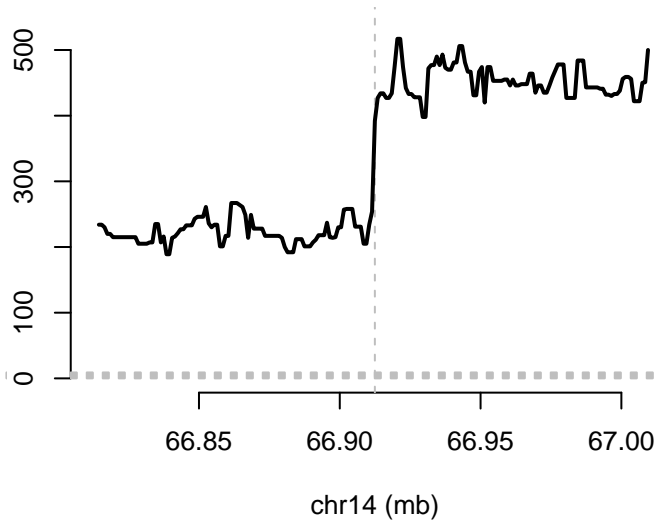

K562 chr14:66,771,600::chr14:66,912,460+-

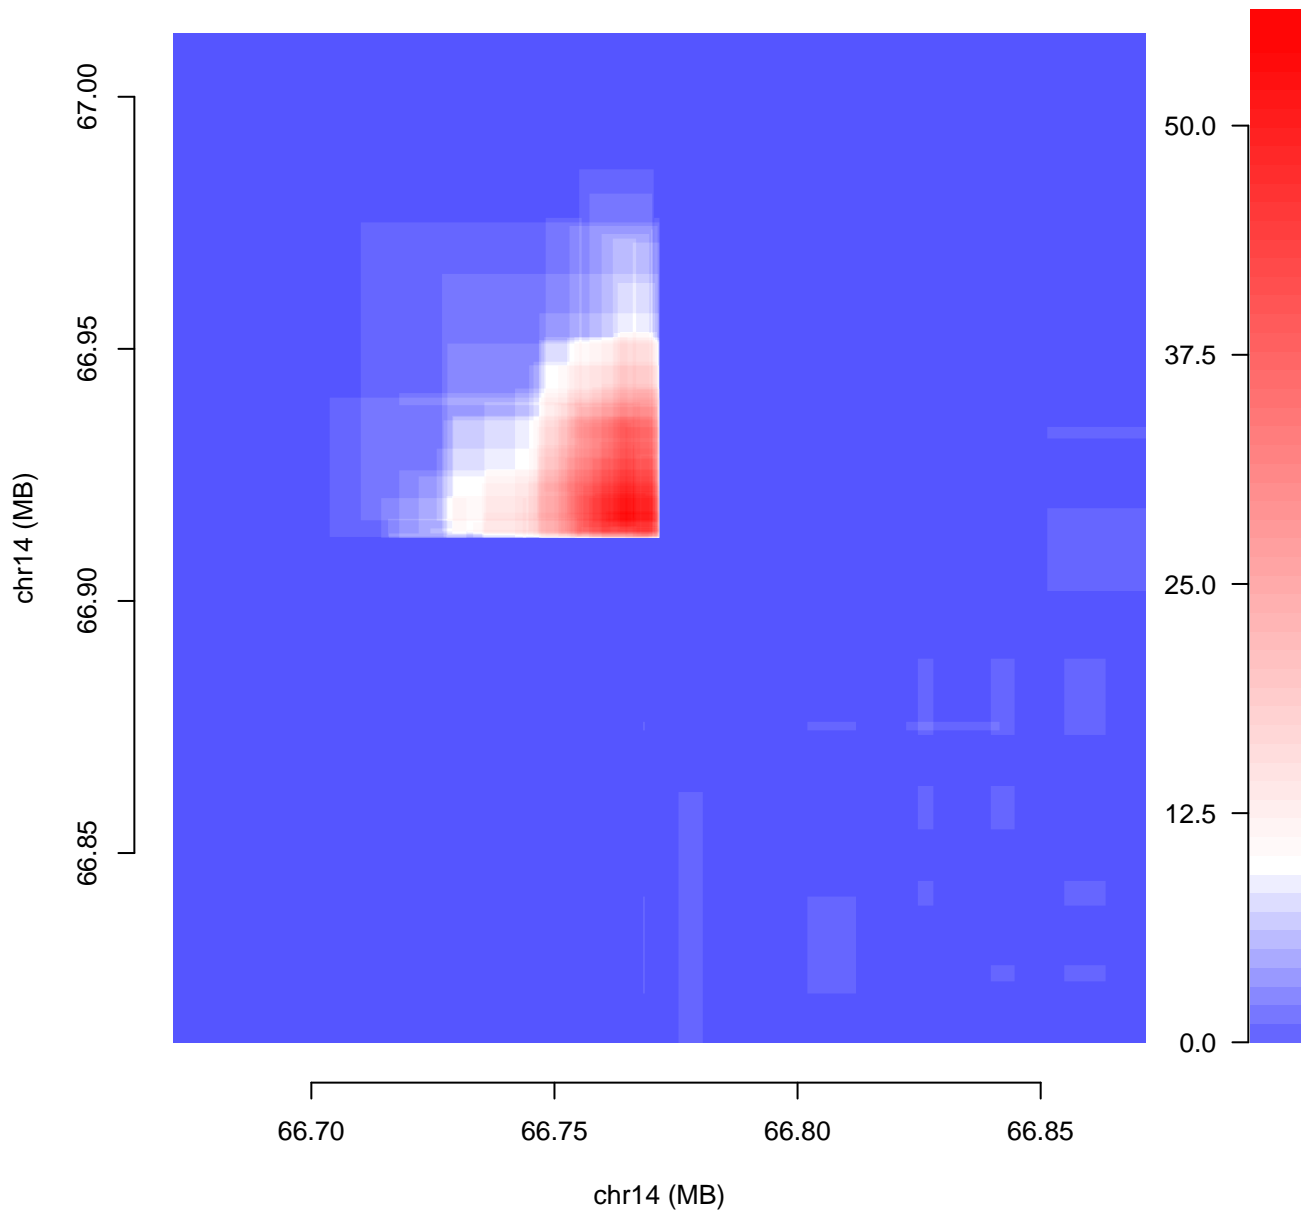

Supplement: Supplemental_Data.zip [file event_345.pdf › event_345.pdf]

Barcode

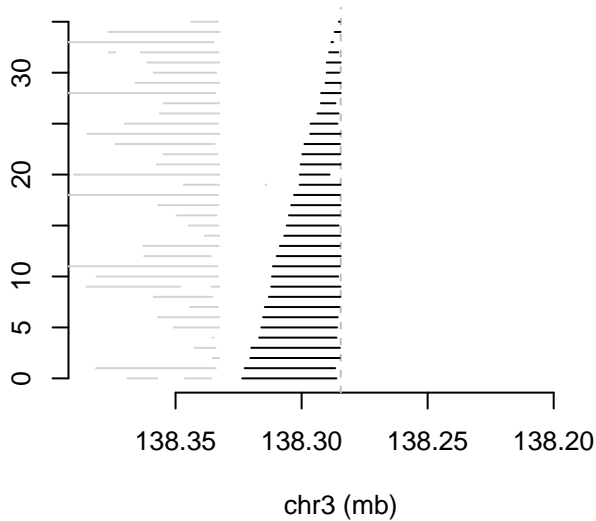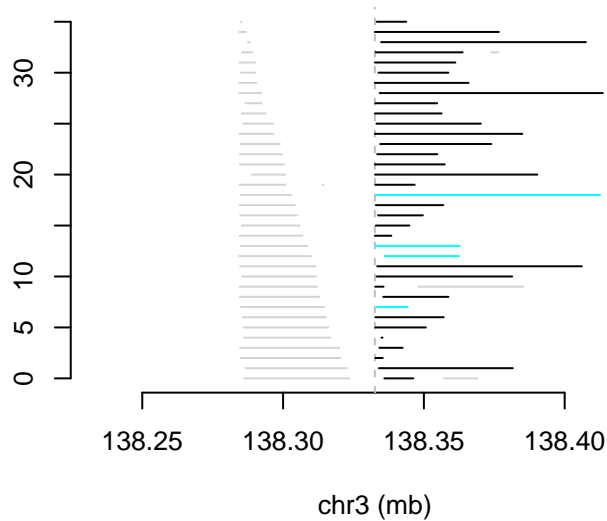

Copy number

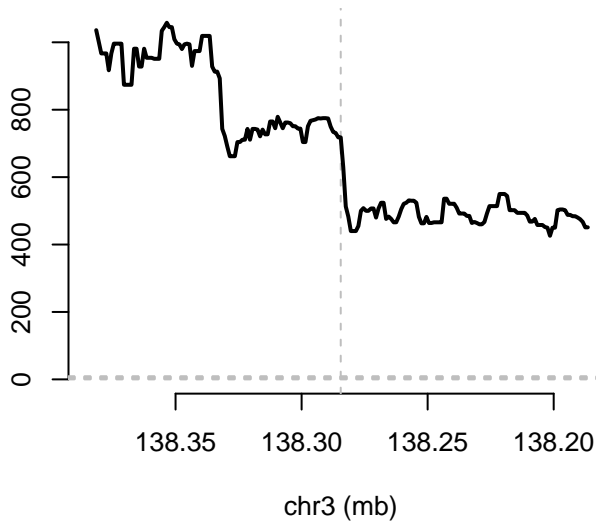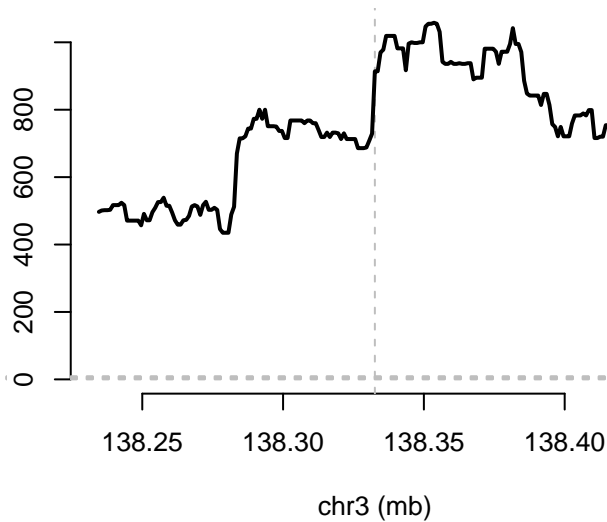

K562 chr3:138,284,474::chr3:138,332,598--

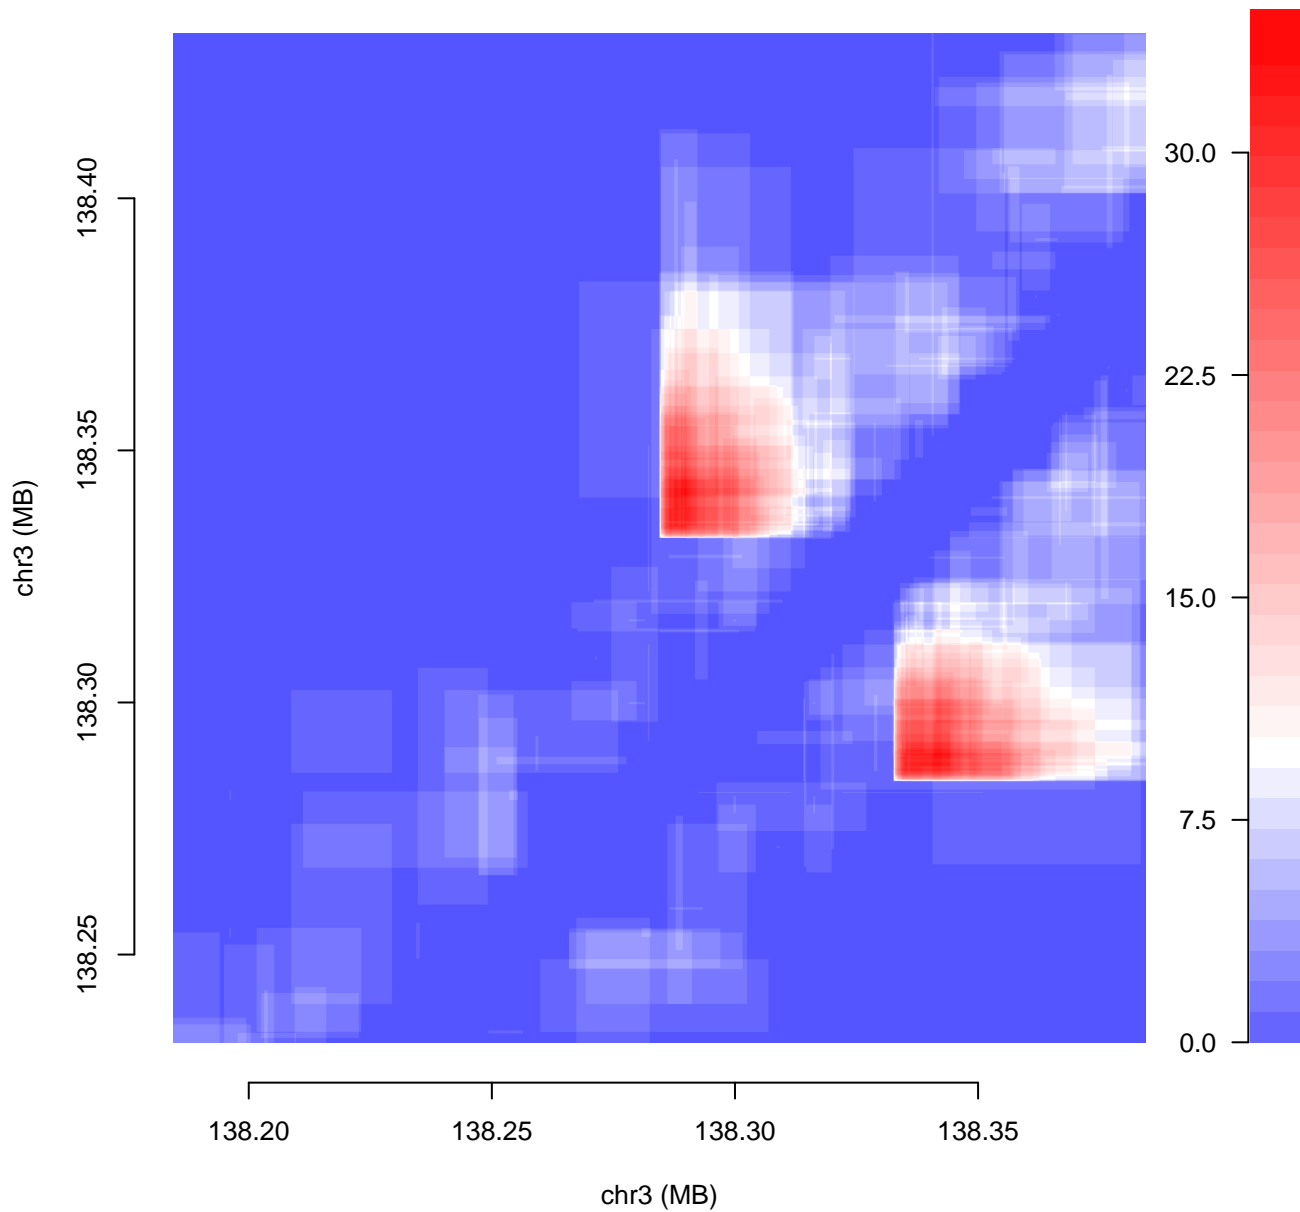

Supplement: Supplemental_Data.zip [file event_346.pdf › event_346.pdf]

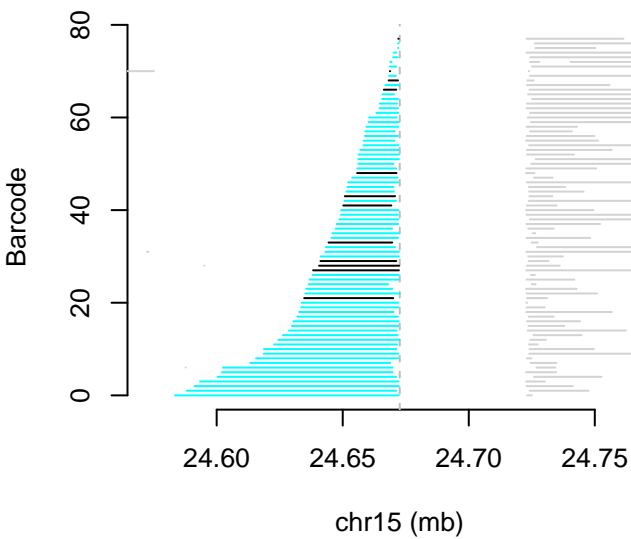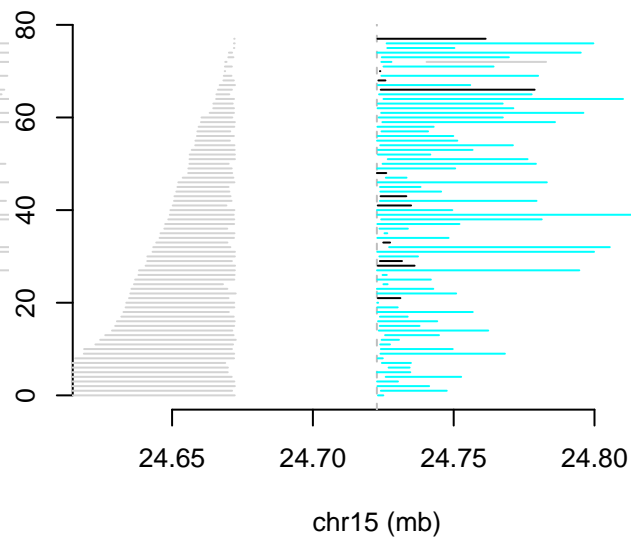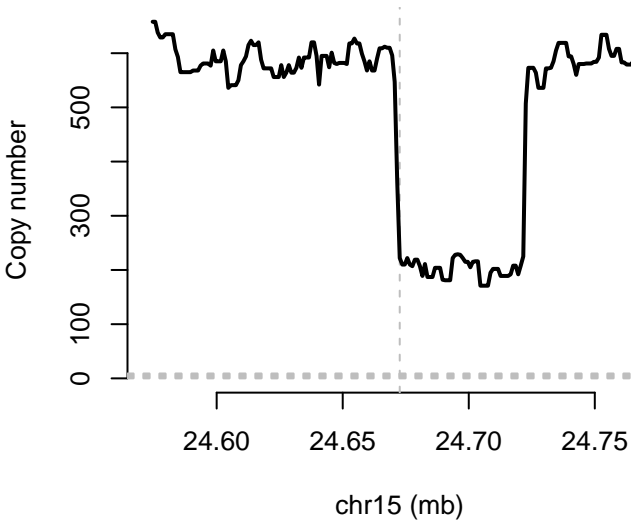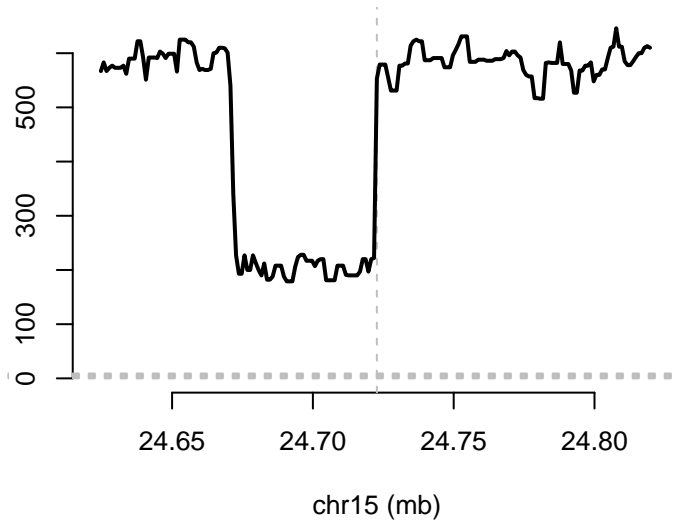

K562 chr15:24,672,622::chr15:24,722,720+-

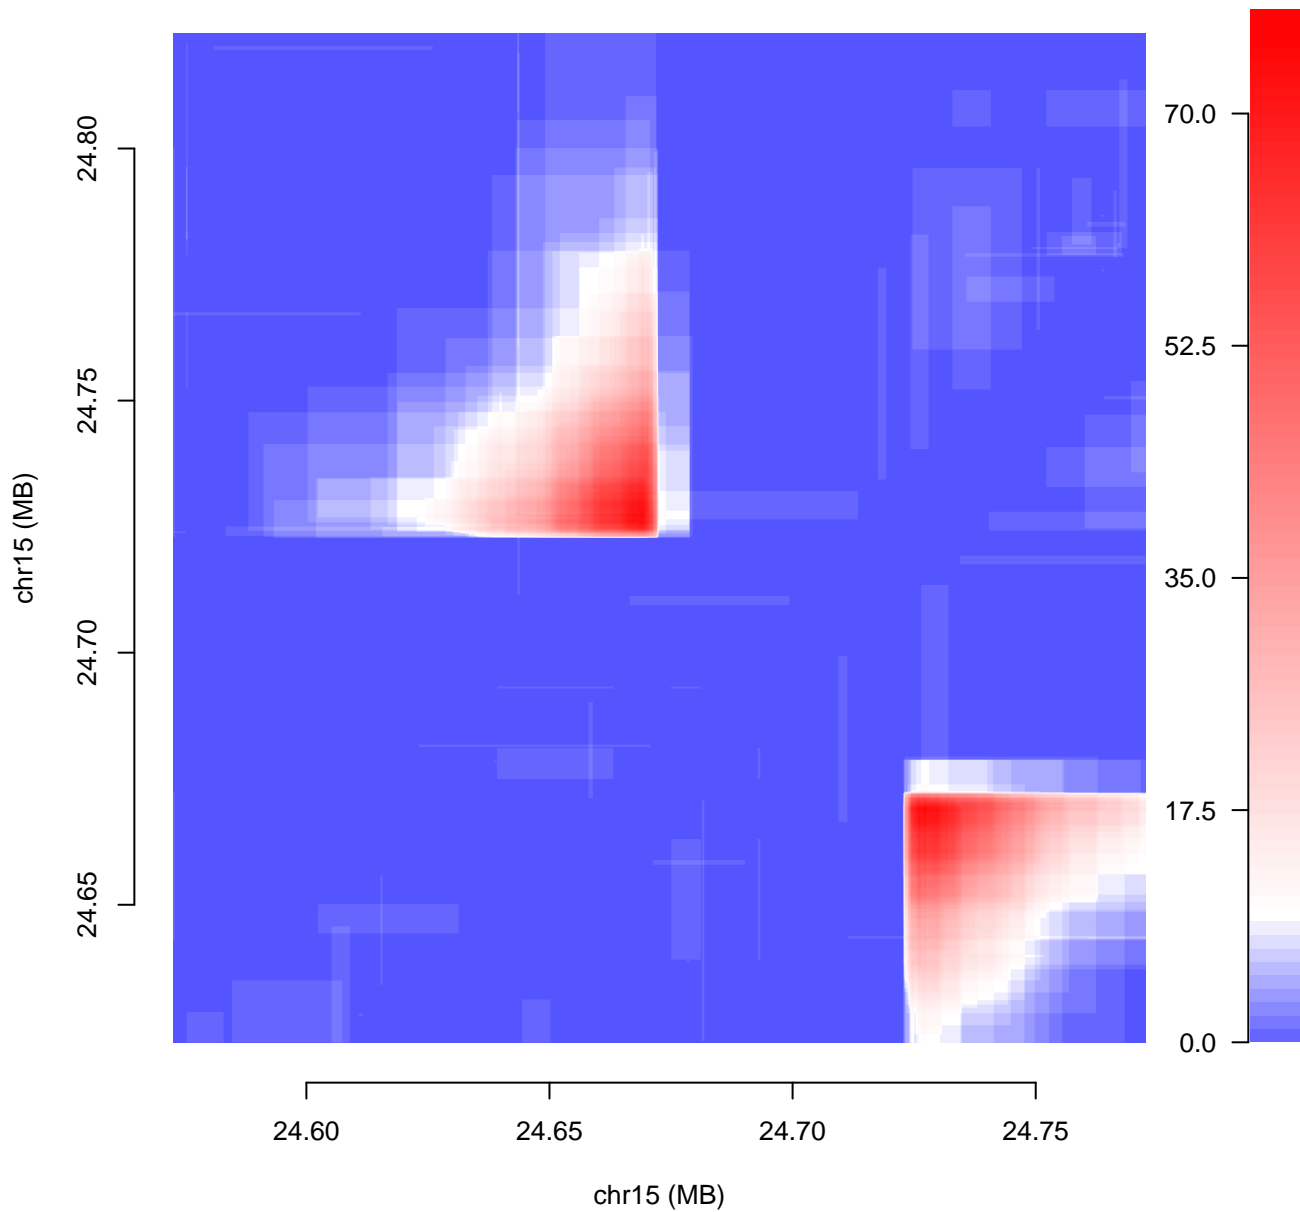

Supplement: Supplemental_Data.zip [file event_347.pdf › event_347.pdf]

Barcode

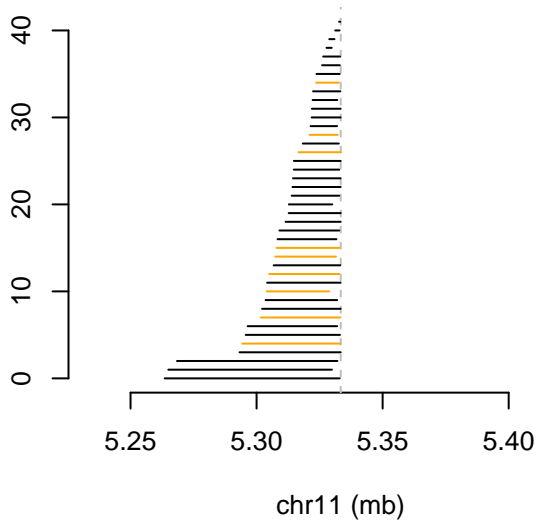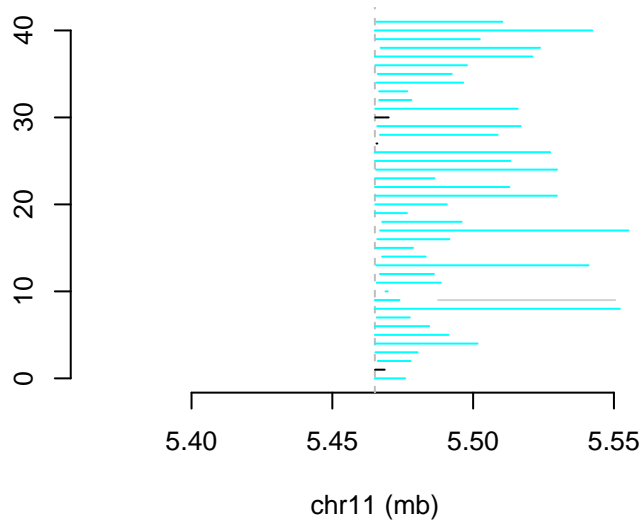

Copy number

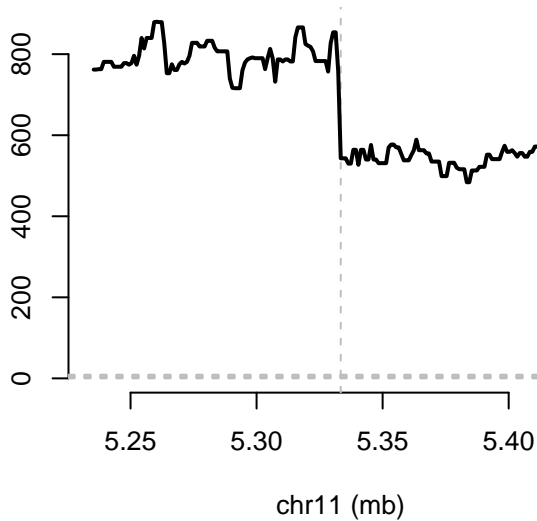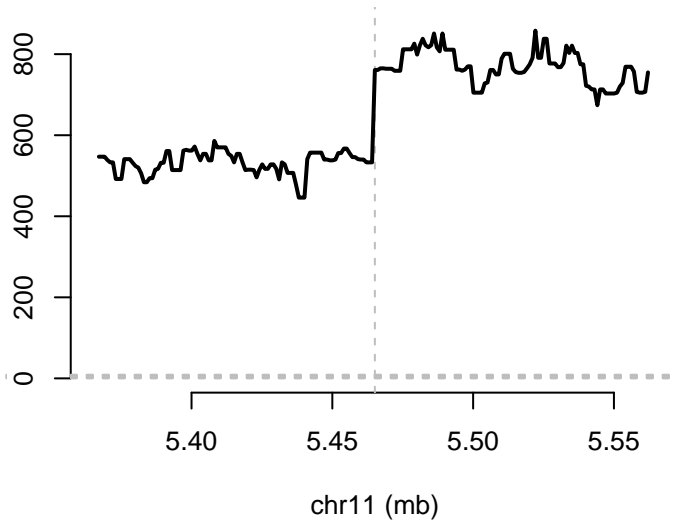

K562 chr11:5,333,386::chr11:5,465,107+-

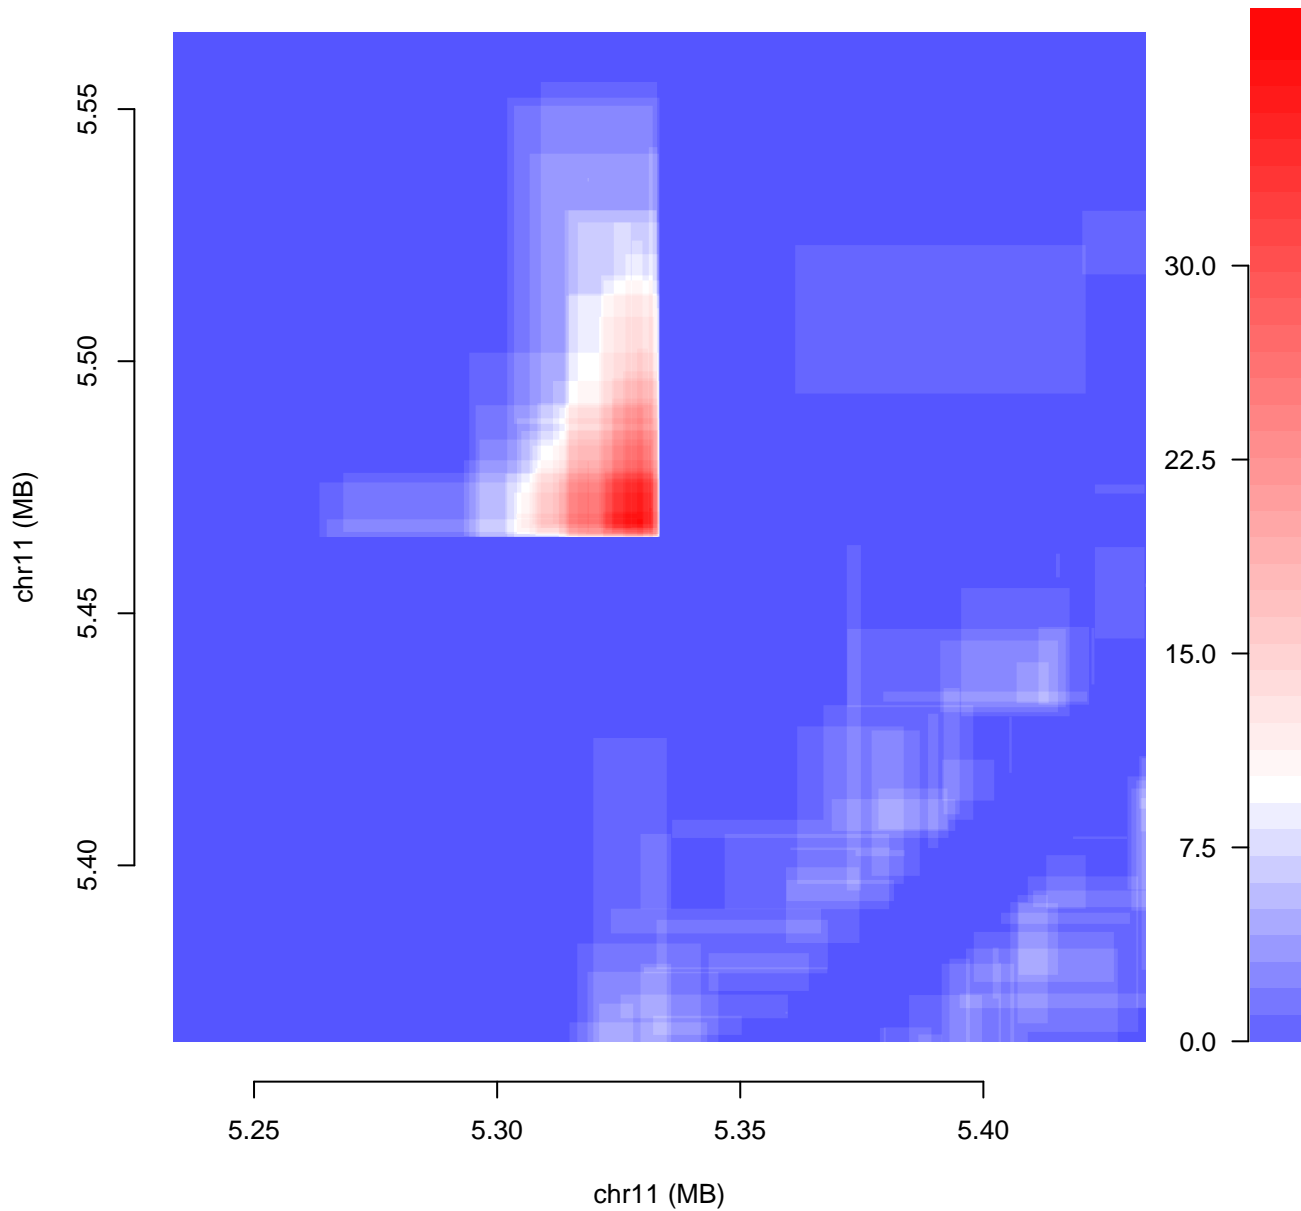

Supplement: Supplemental_Data.zip [file event_348.pdf › event_348.pdf]

Barcode

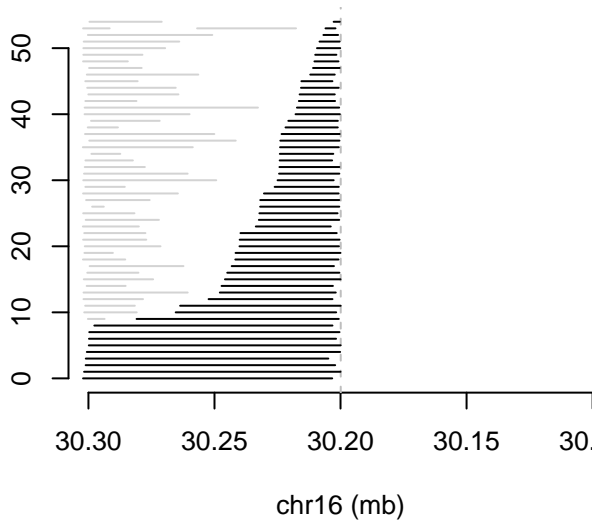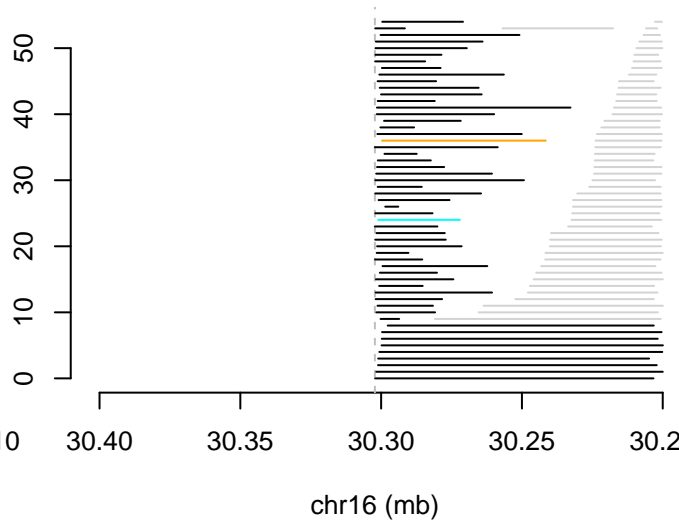

Copy number

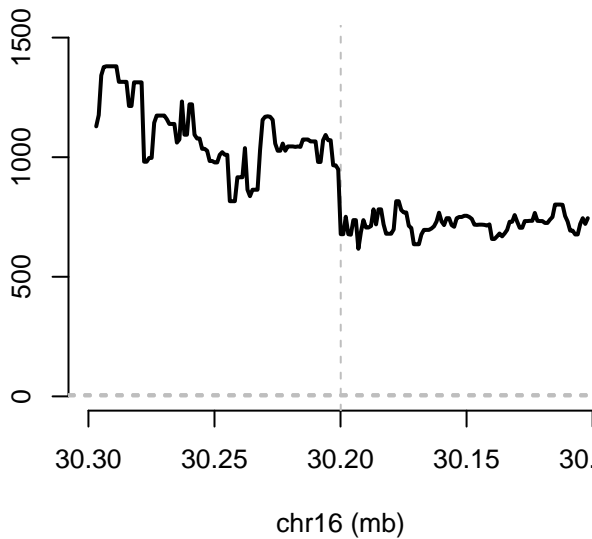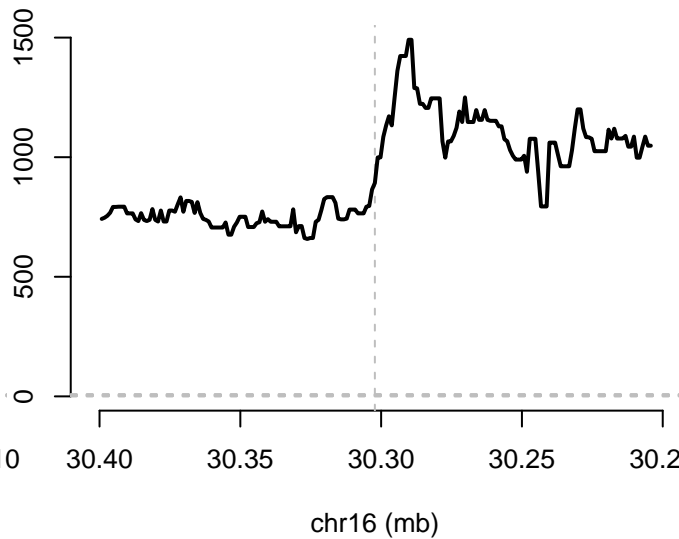

K562 chr16:30,199,913::chr16:30,302,225-+

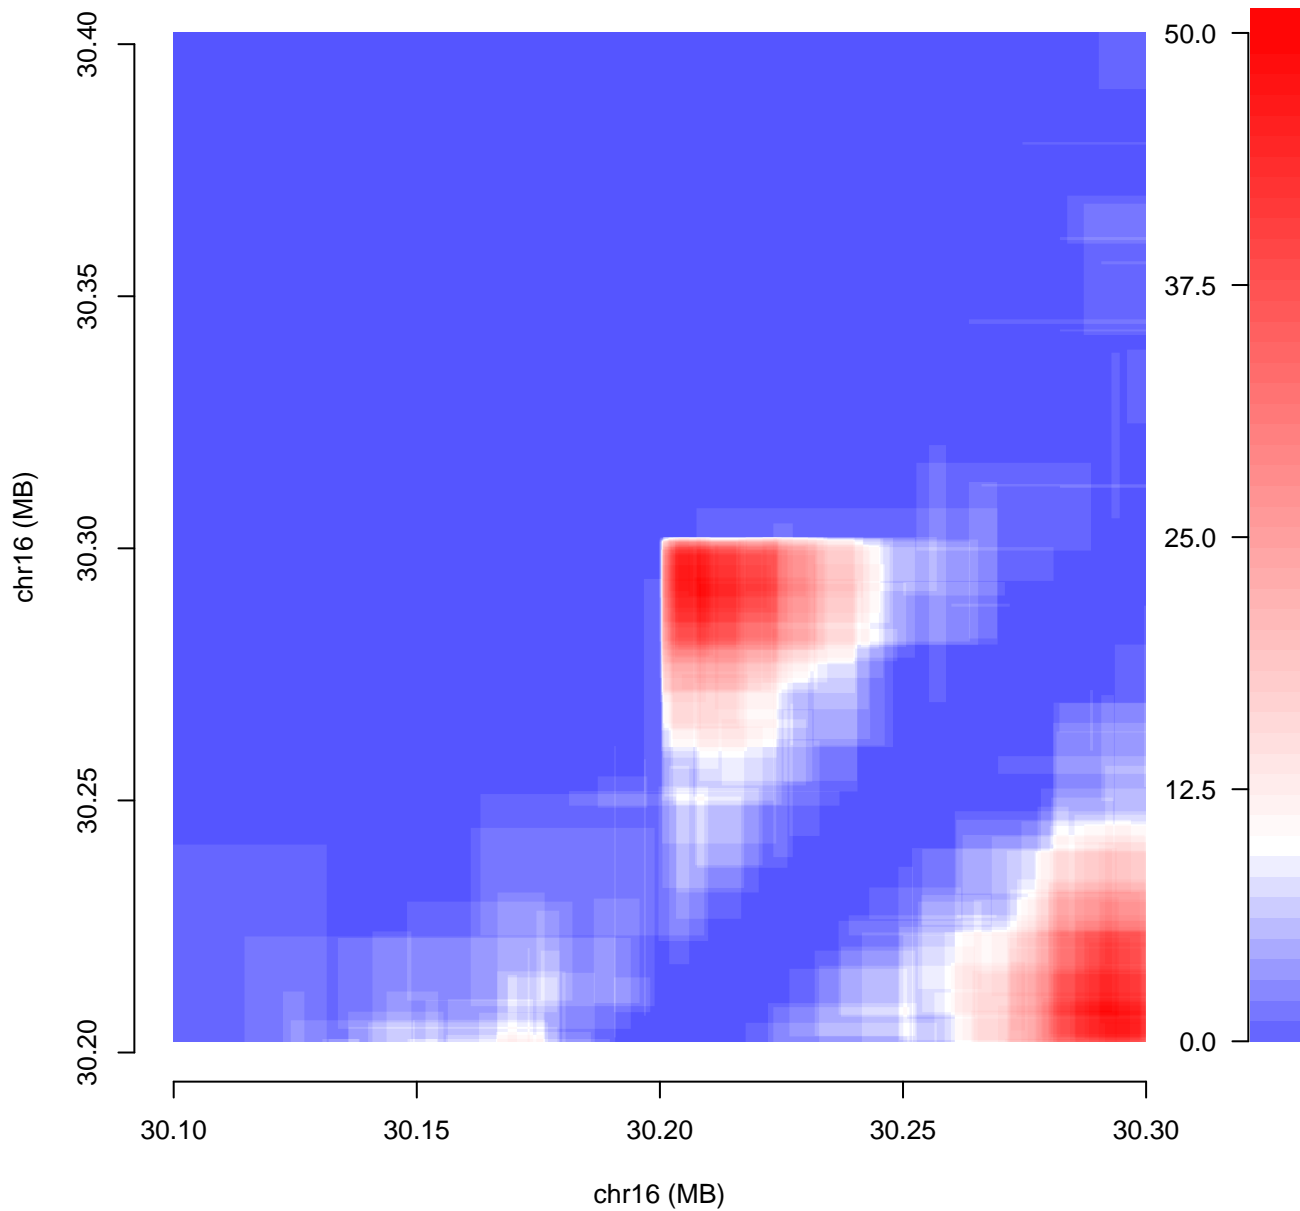

Supplement: Supplemental_Data.zip [file event_349.pdf › event_349.pdf]

Barcode

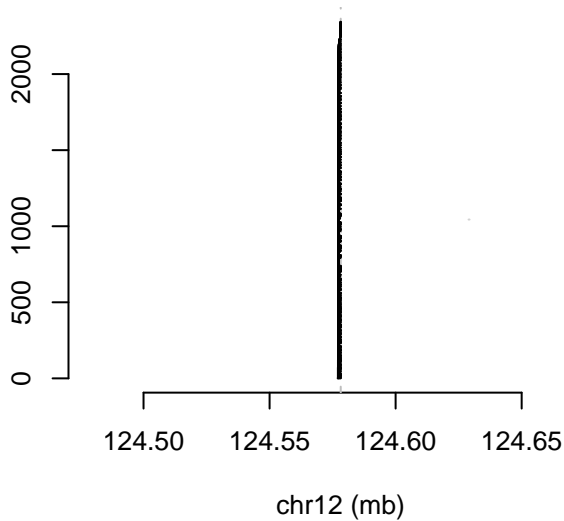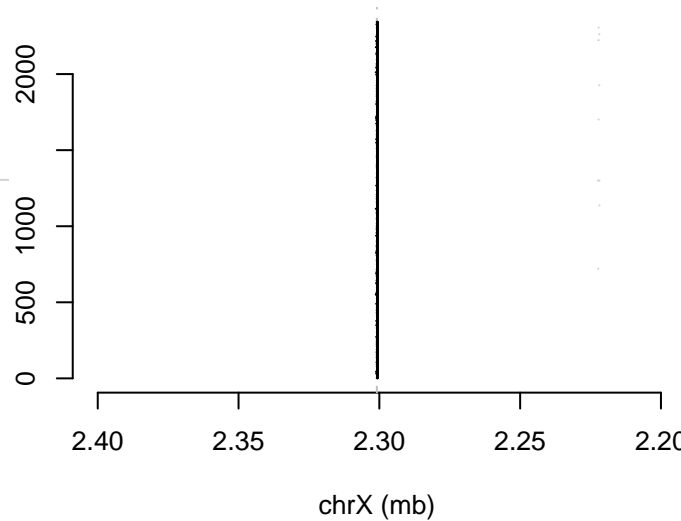

Copy number

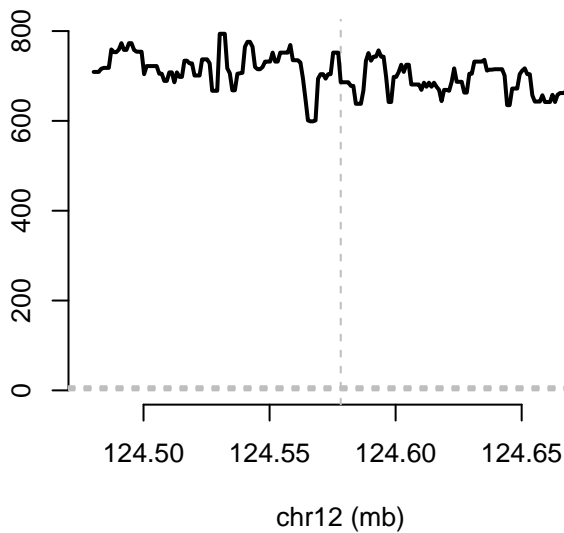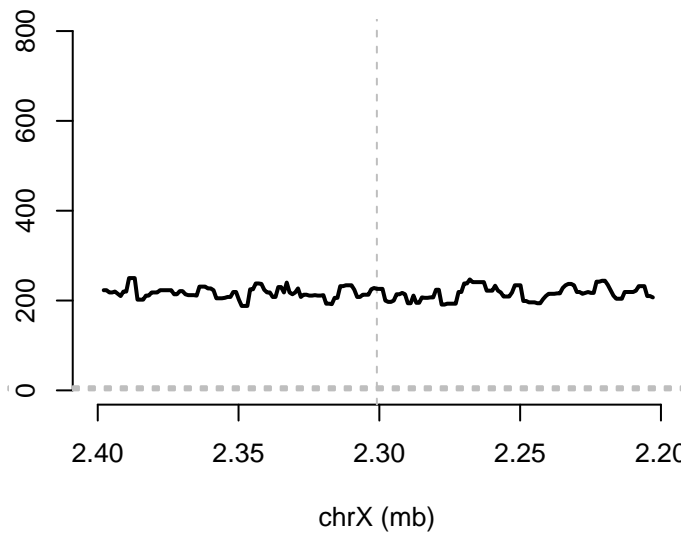

K562 chr12:124,578,229::chrX:2,300,879++

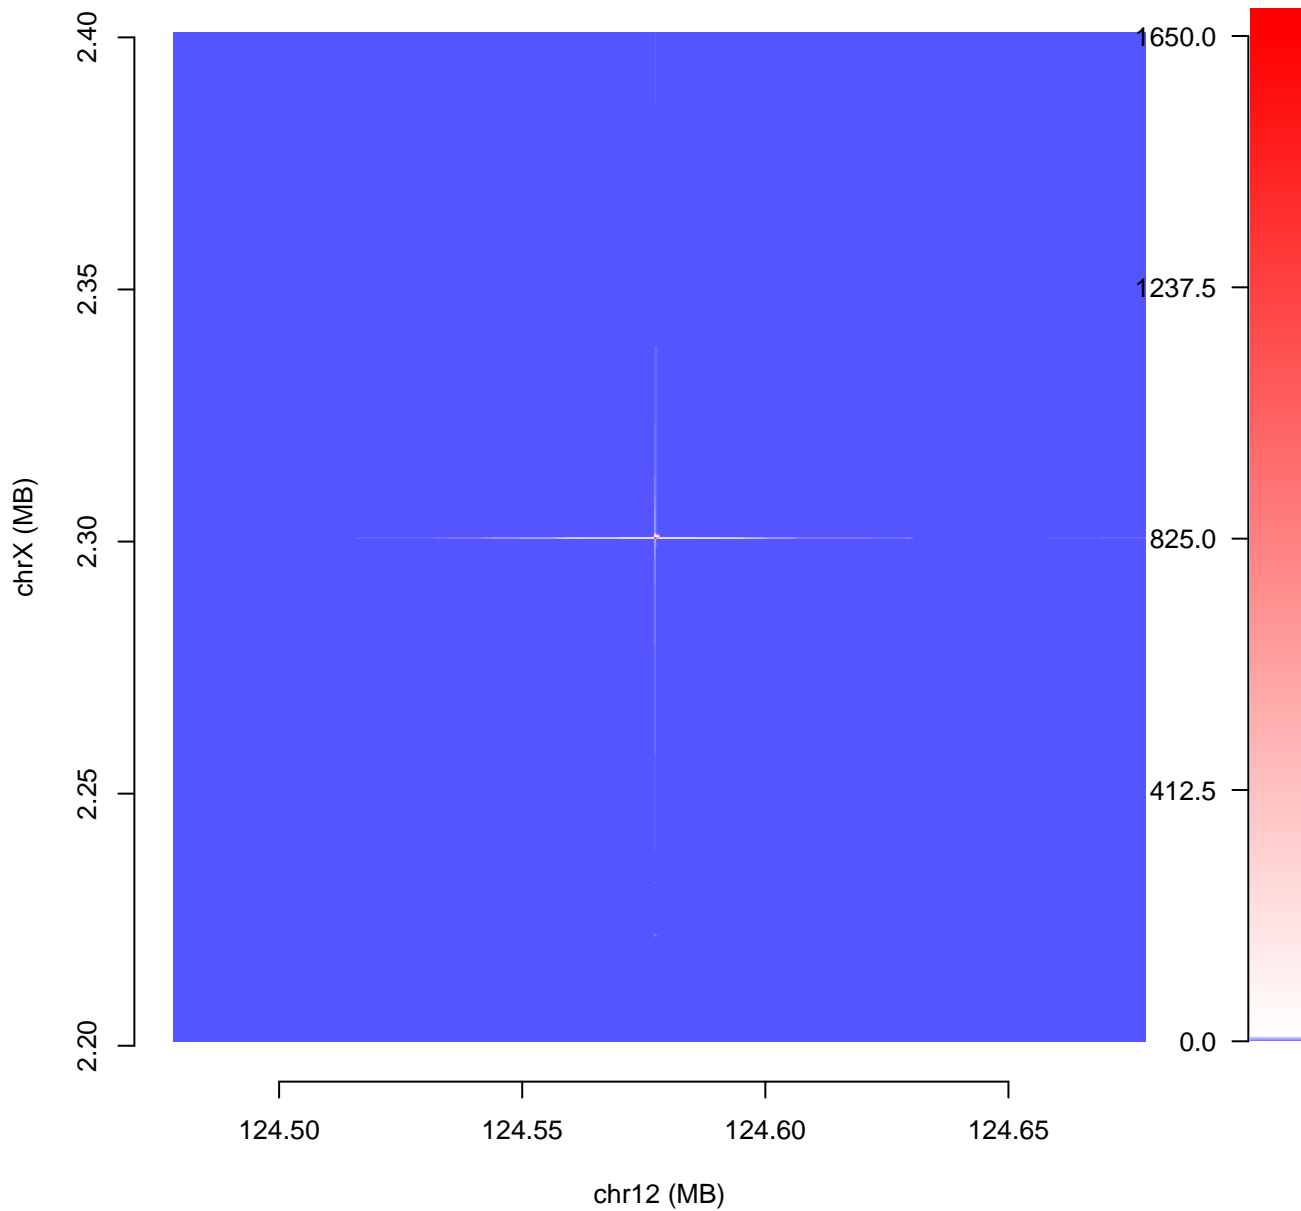

Supplement: Supplemental_Data.zip [file event_35.pdf › event_35.pdf]

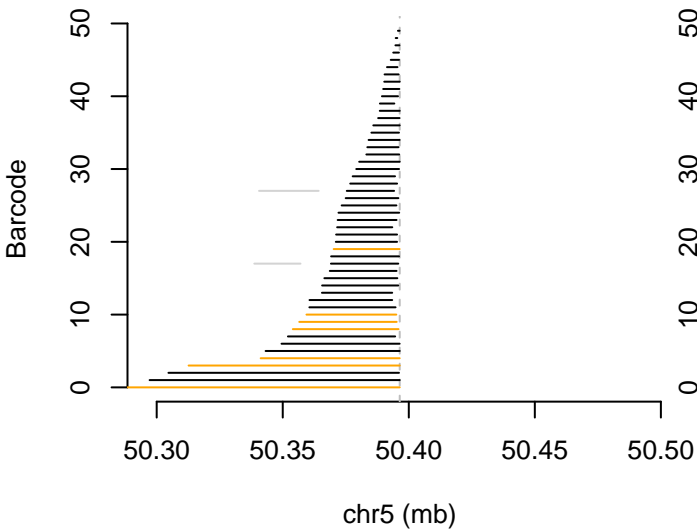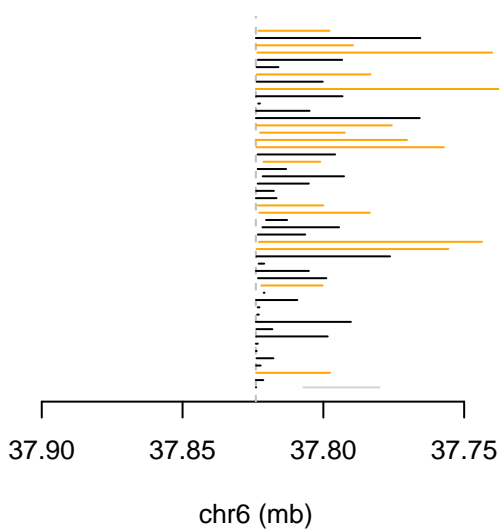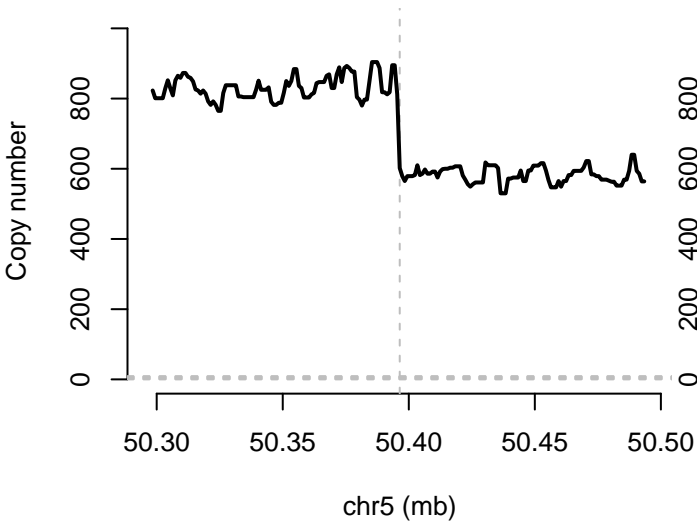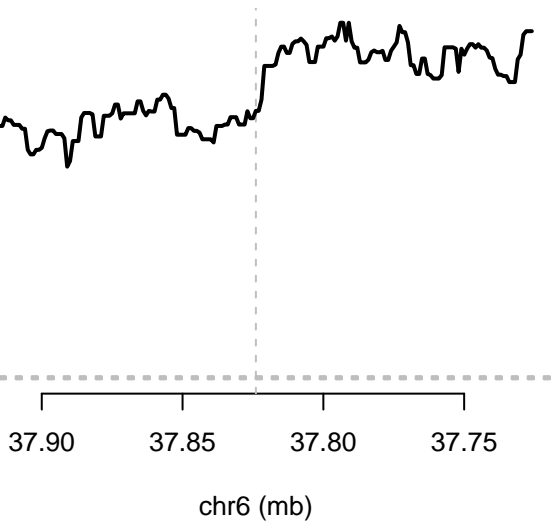

K562 chr5:50,396,410::chr6:37,823,967++

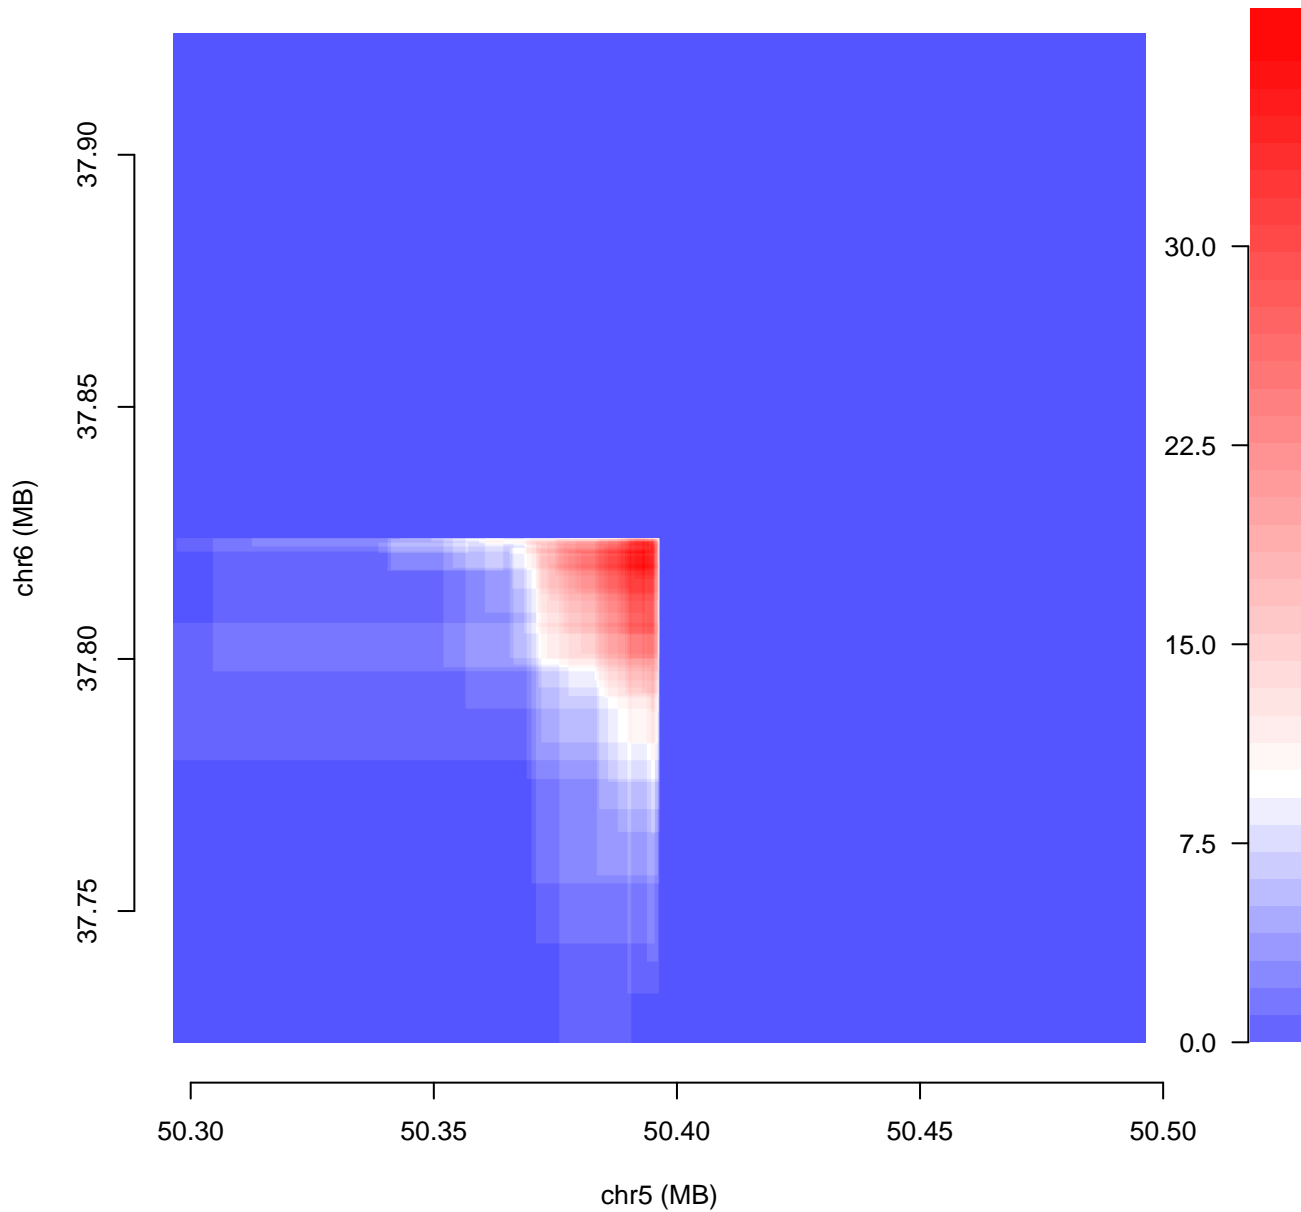

Supplement: Supplemental_Data.zip [file event_350.pdf › event_350.pdf]

Barcode

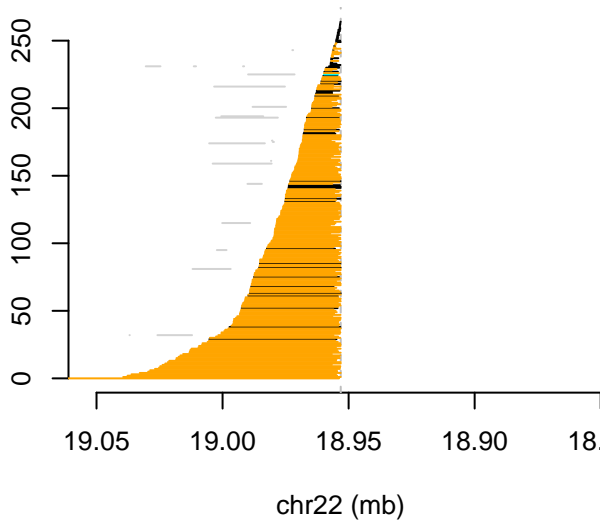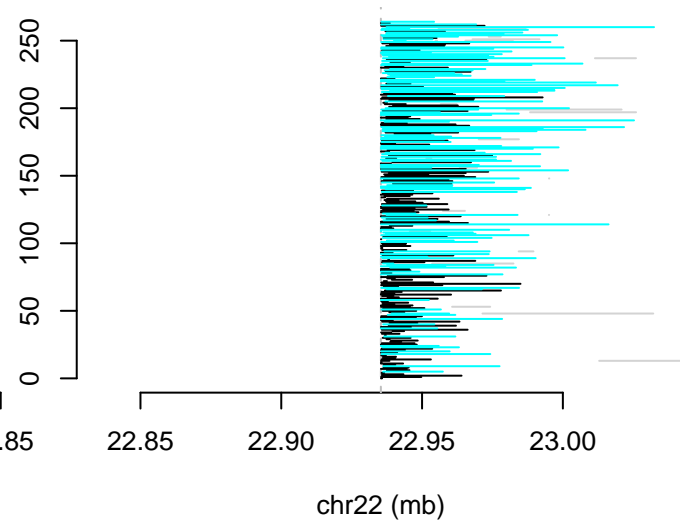

Copy number

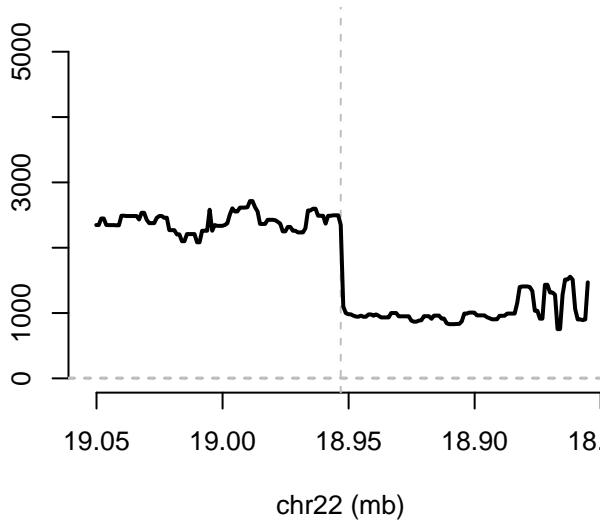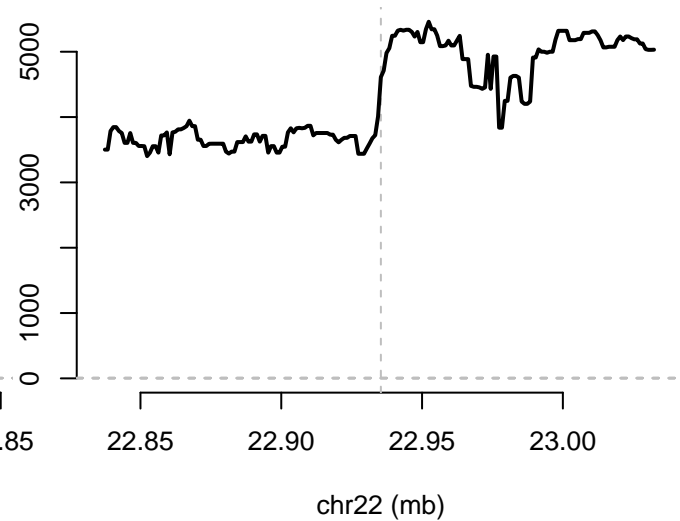

K562 chr22:18,953,122::chr22:22,935,373--

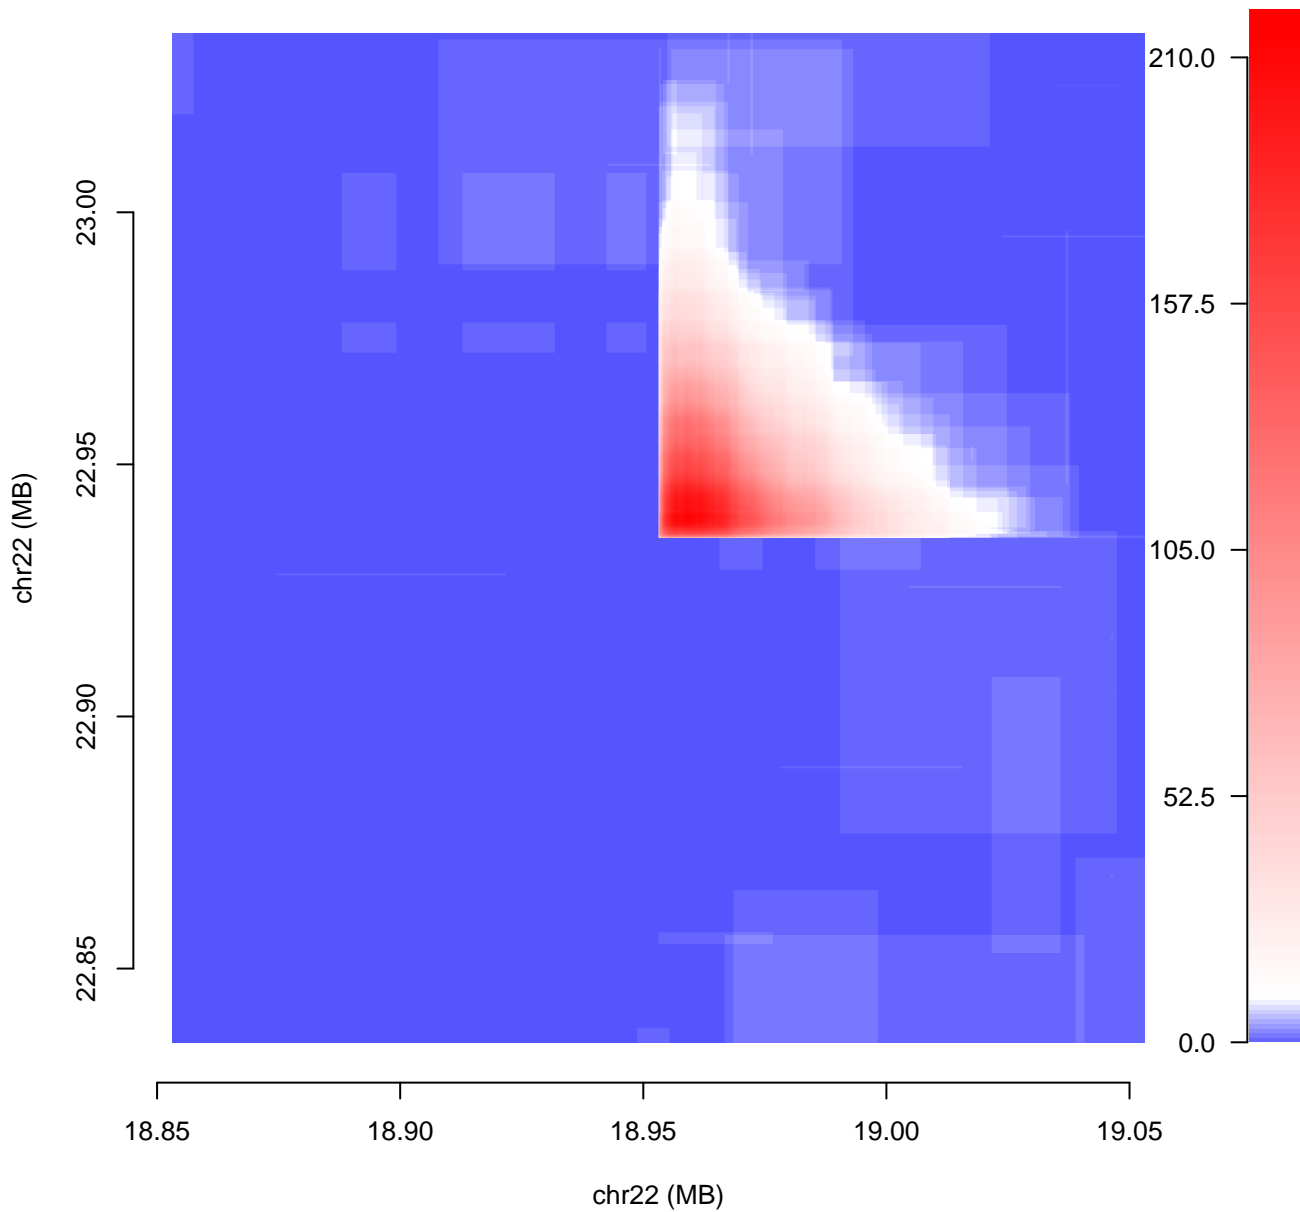

Supplement: Supplemental_Data.zip [file event_351.pdf › event_351.pdf]

Barcode

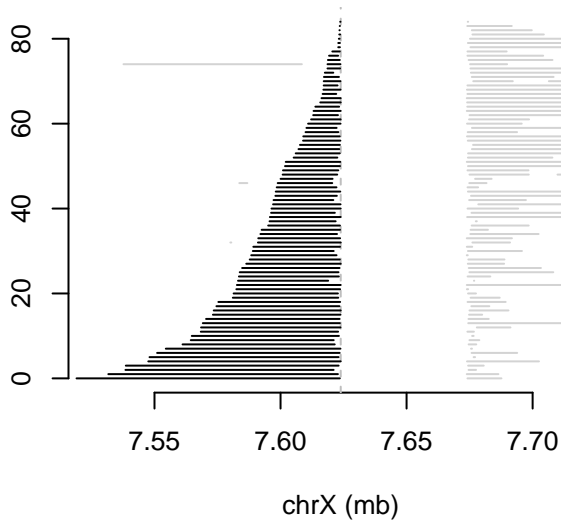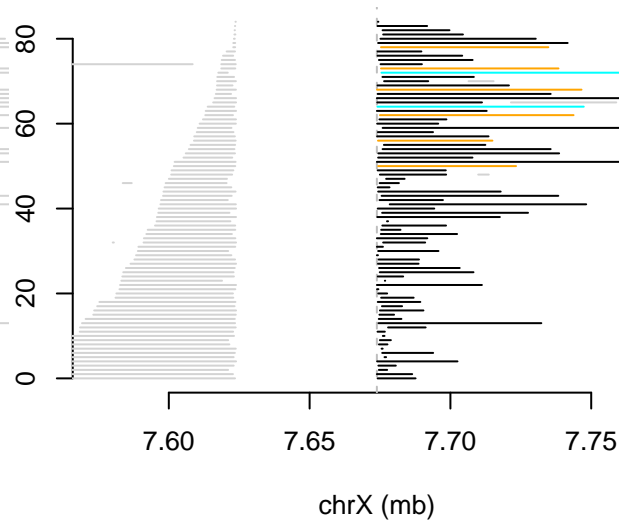

Copy number

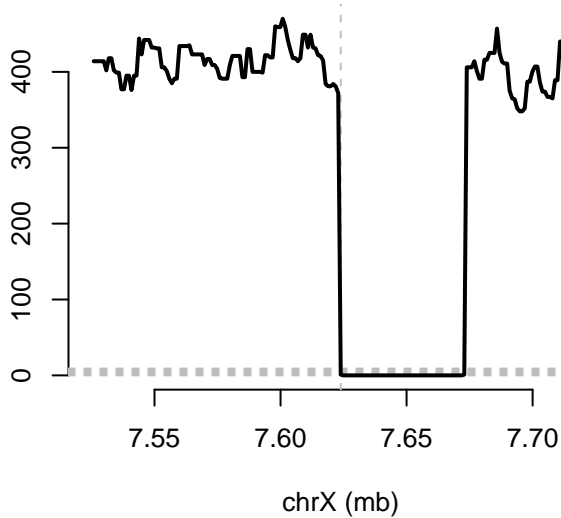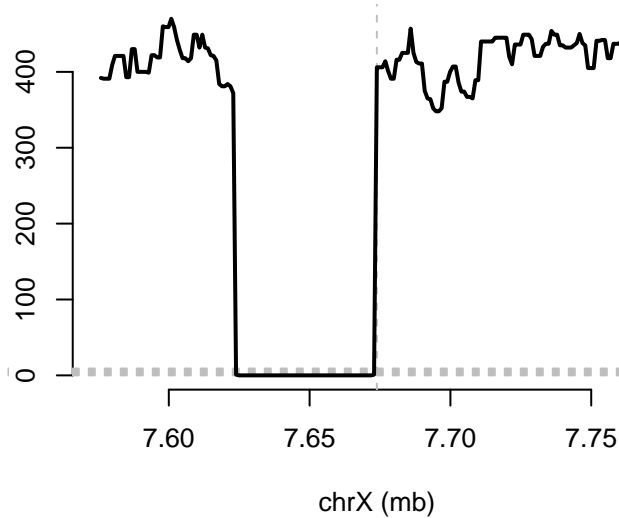

K562 chrX:7,673,882::chrX:7,623,882-+

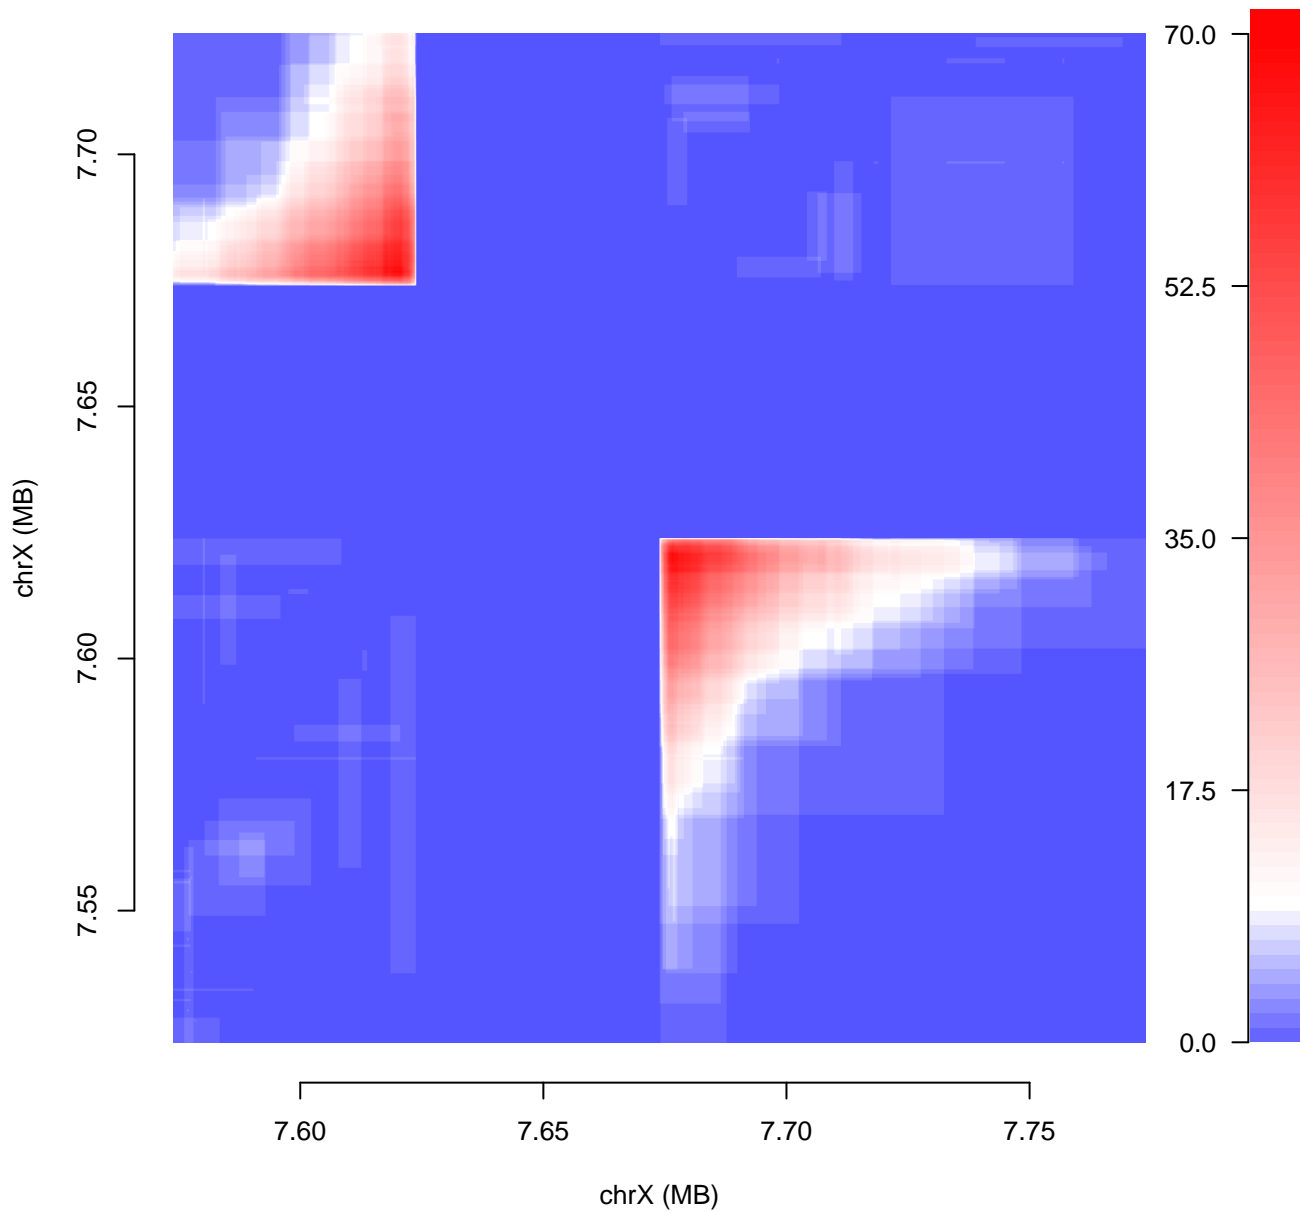

Supplement: Supplemental_Data.zip [file event_352.pdf › event_352.pdf]

Barcode

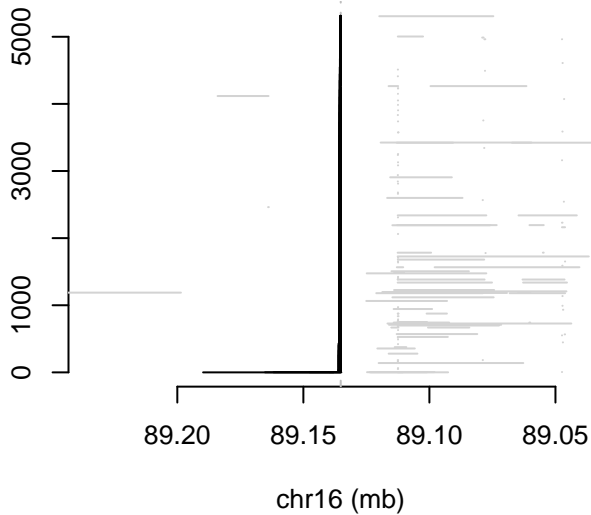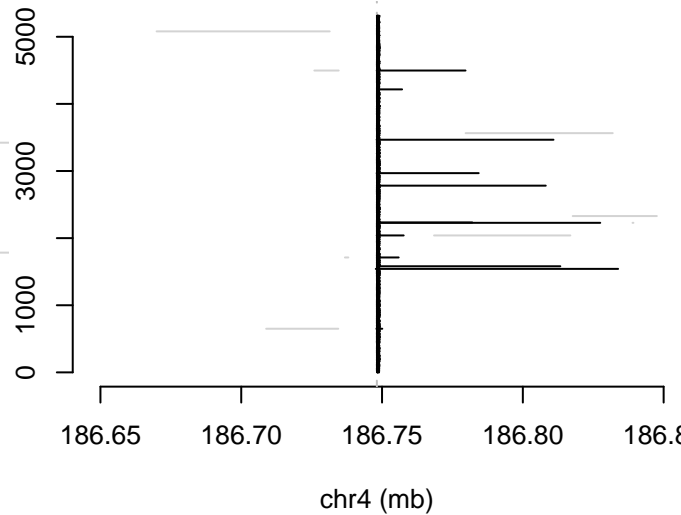

Copy number

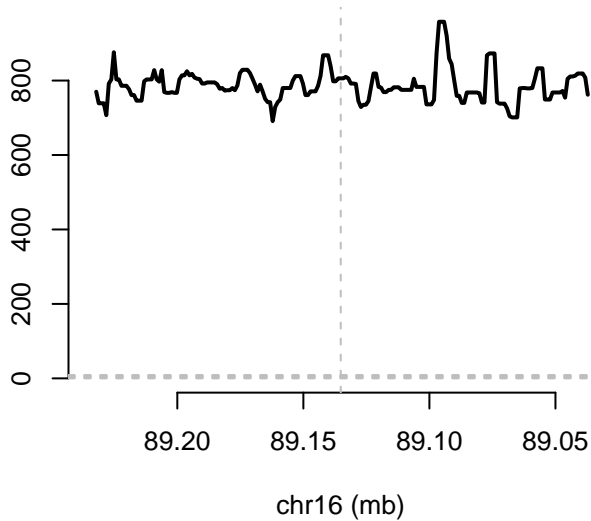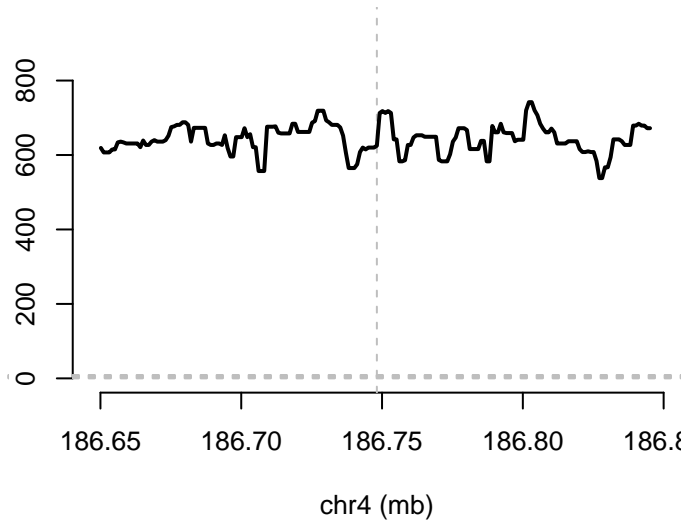

K562 chr16:89,135,172::chr4:186,748,161--

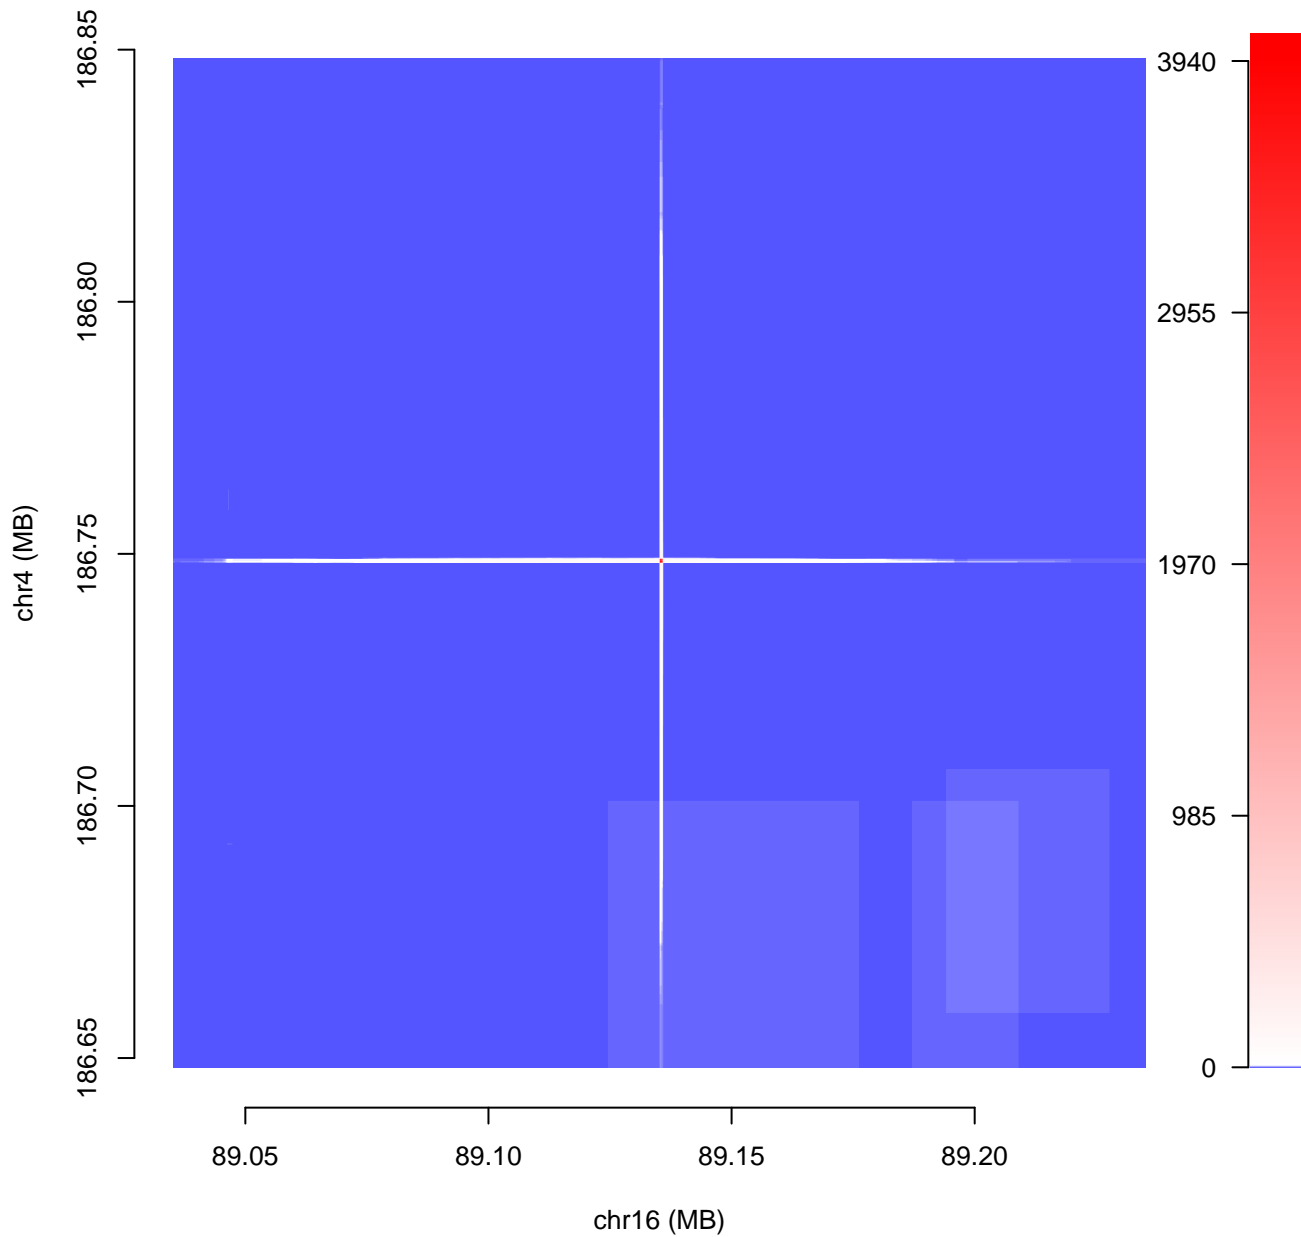

Supplement: Supplemental_Data.zip [file event_353.pdf › event_353.pdf]

Barcode

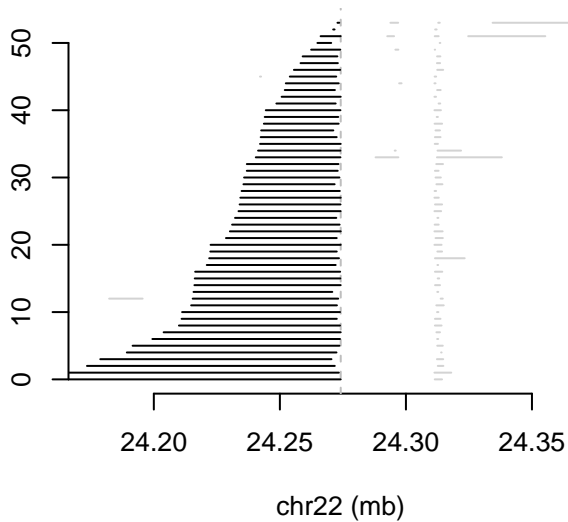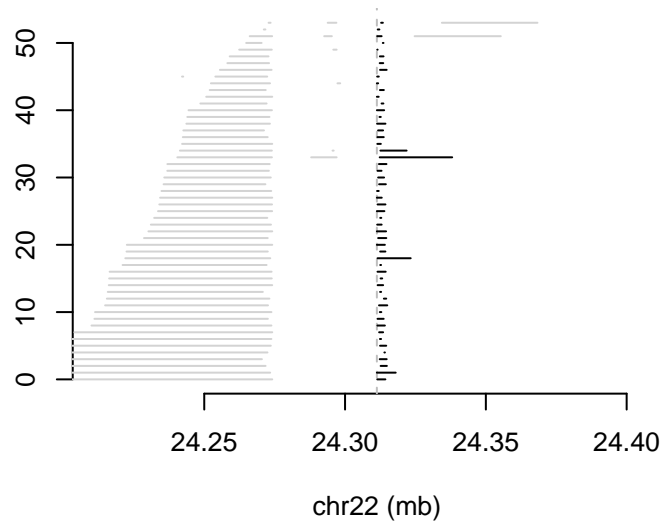

Copy number

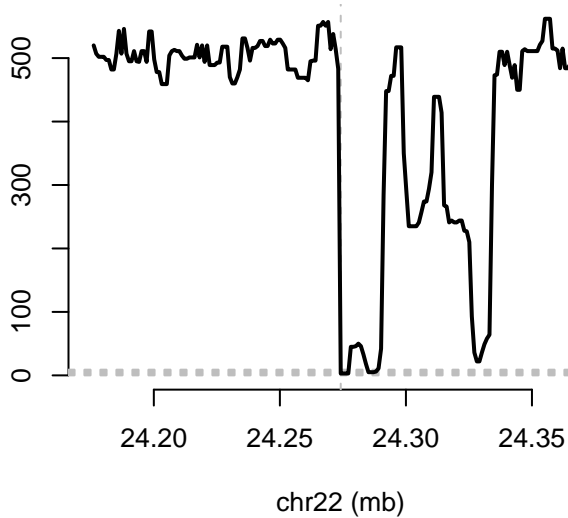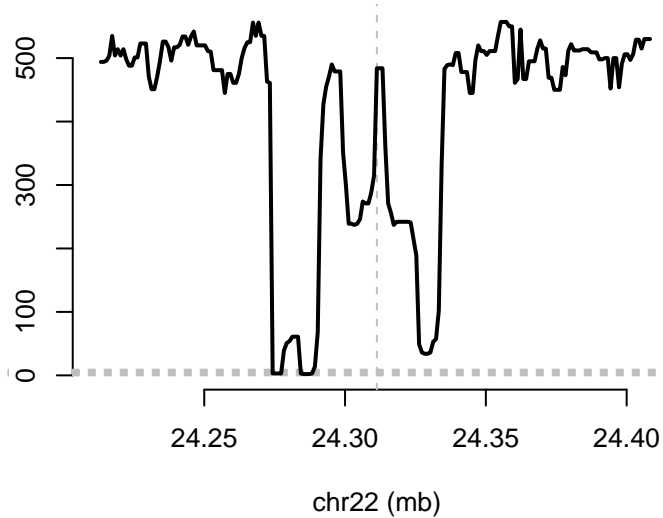

K562 chr22:24,274,144::chr22:24,311,297+-

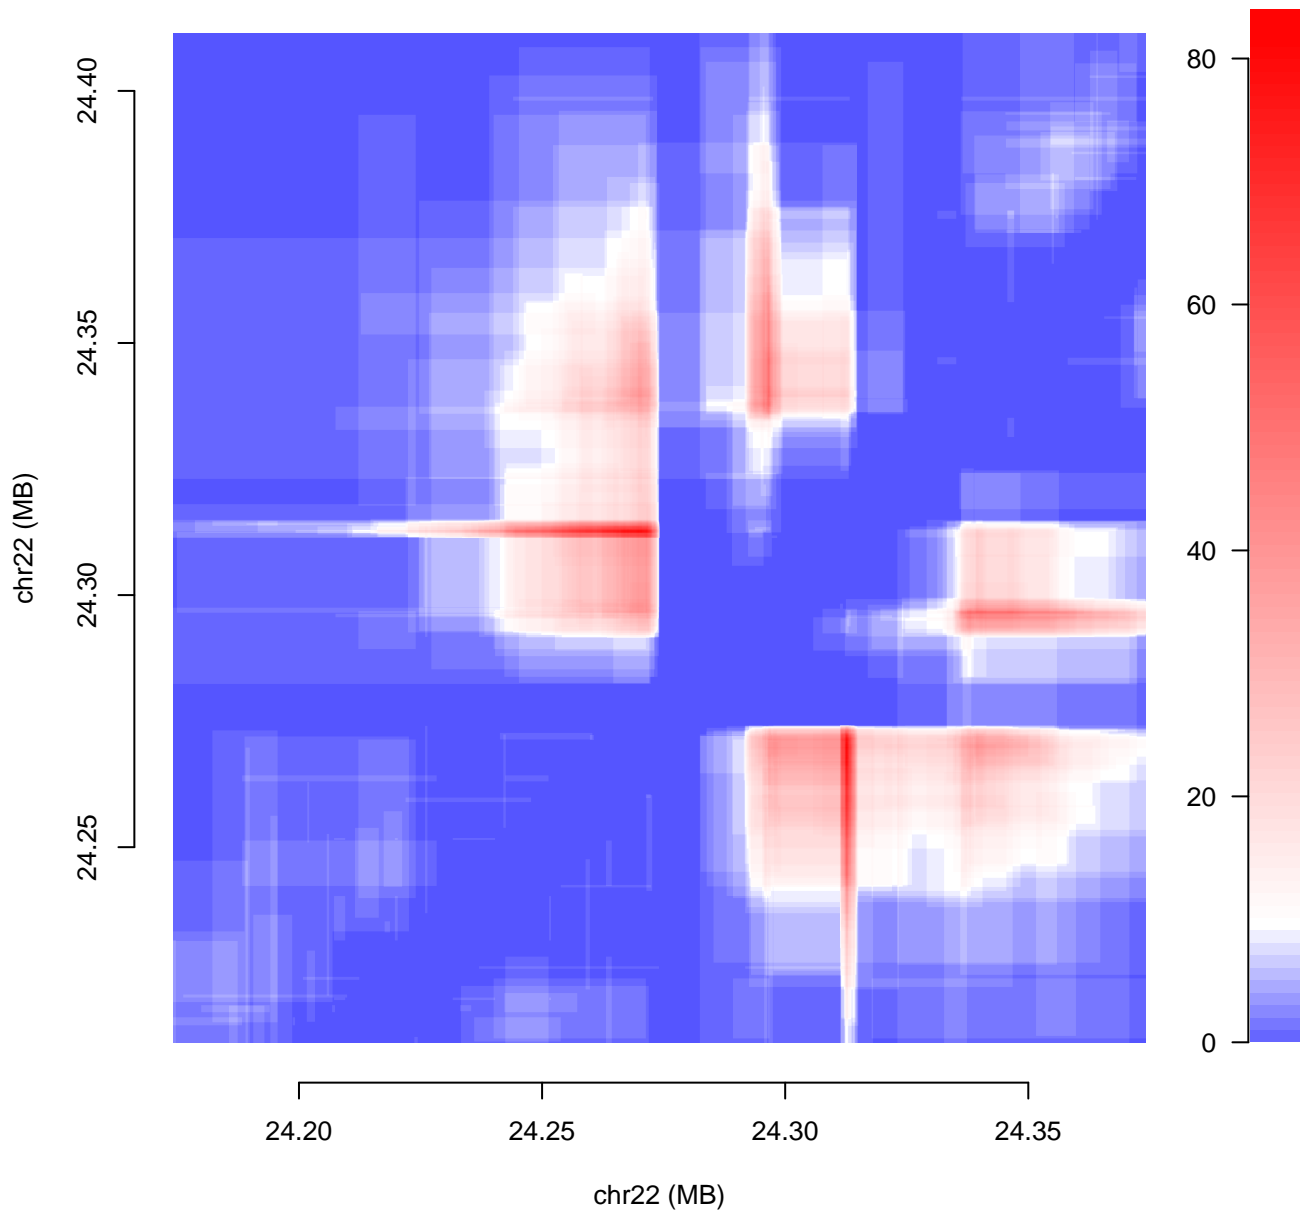

Supplement: Supplemental_Data.zip [file event_354.pdf › event_354.pdf]

Barcode

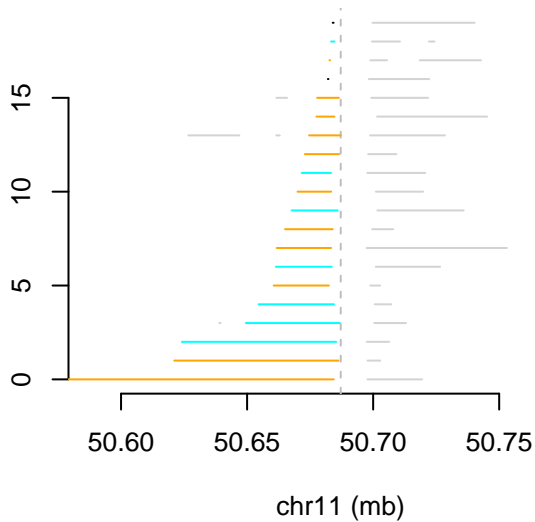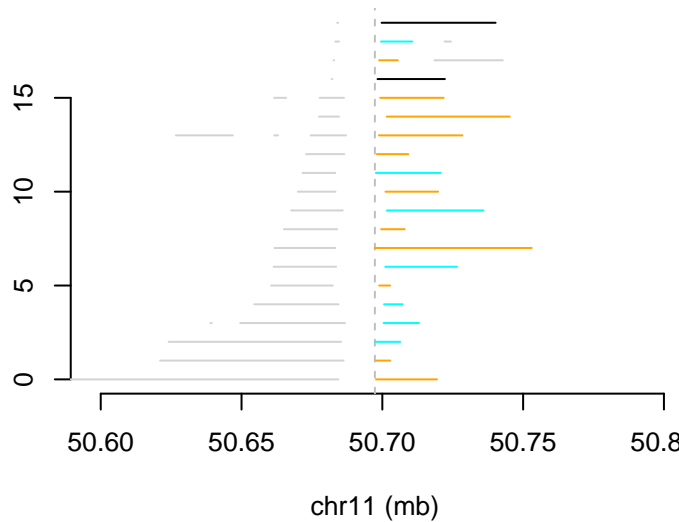

Copy number

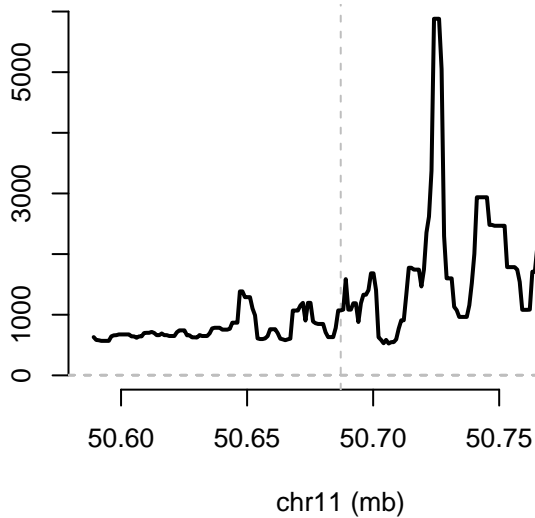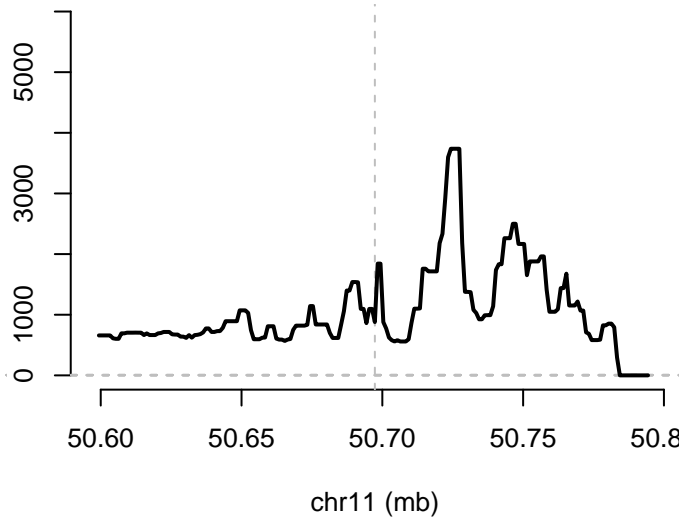

K562 chr11:50,697,355::chr11:50,687,144-+

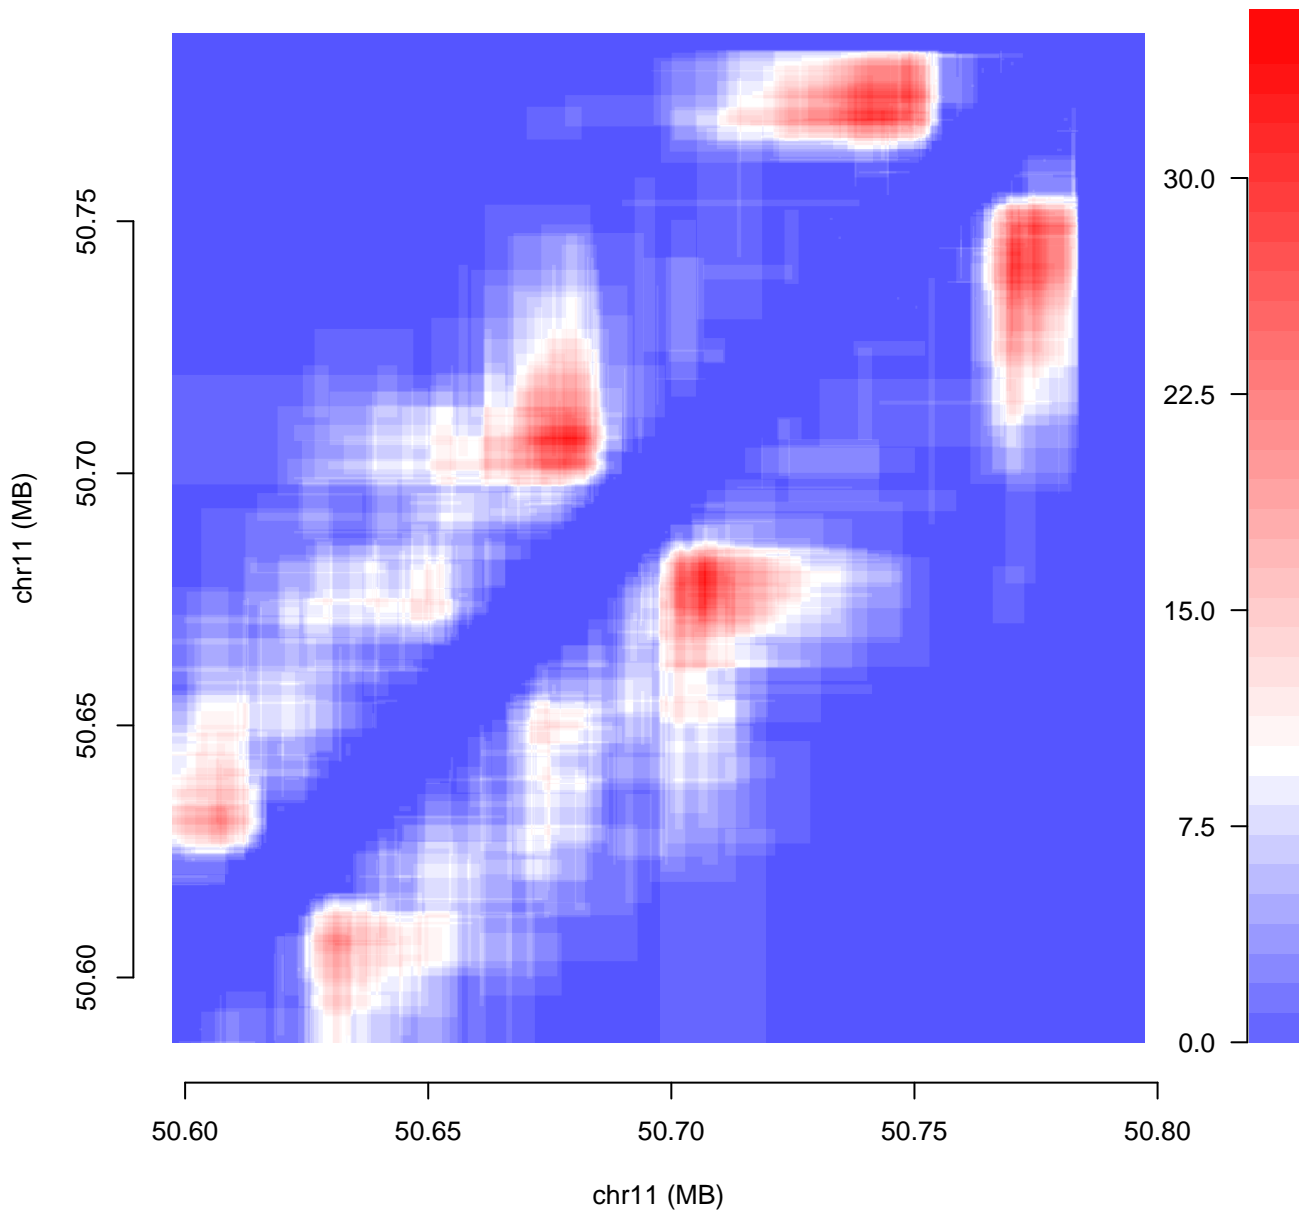

Supplement: Supplemental_Data.zip [file event_355.pdf › event_355.pdf]

Barcode

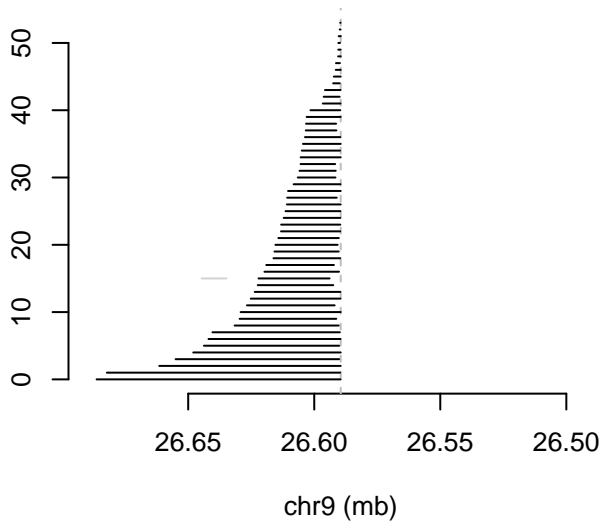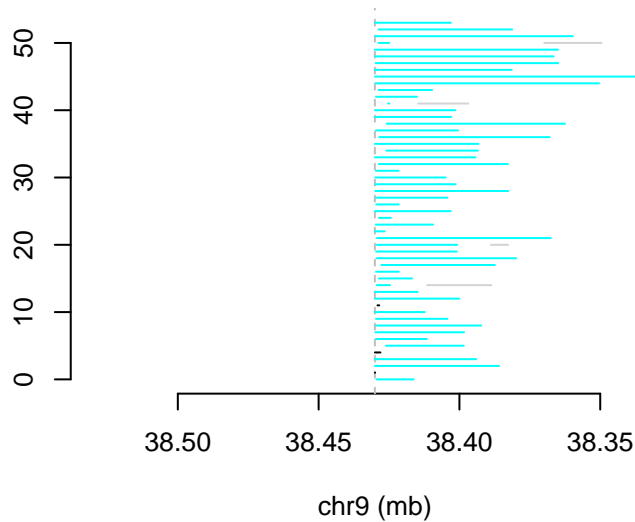

Copy number

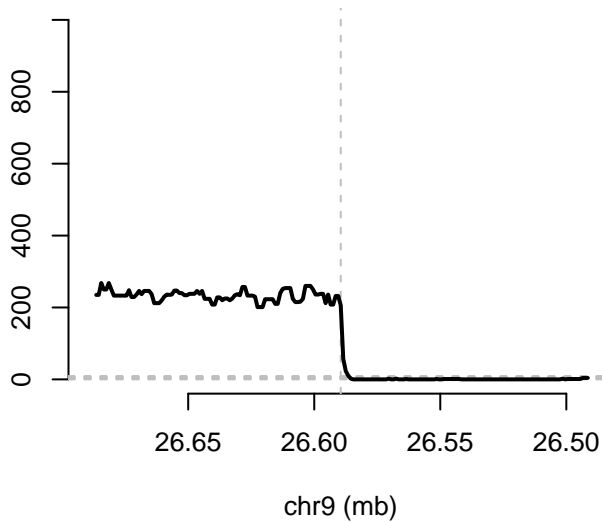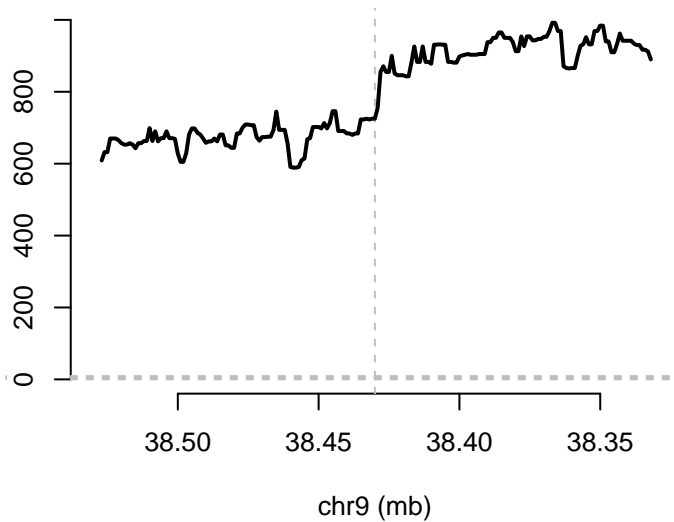

K562 chr9:26,589,488::chr9:38,430,026-+

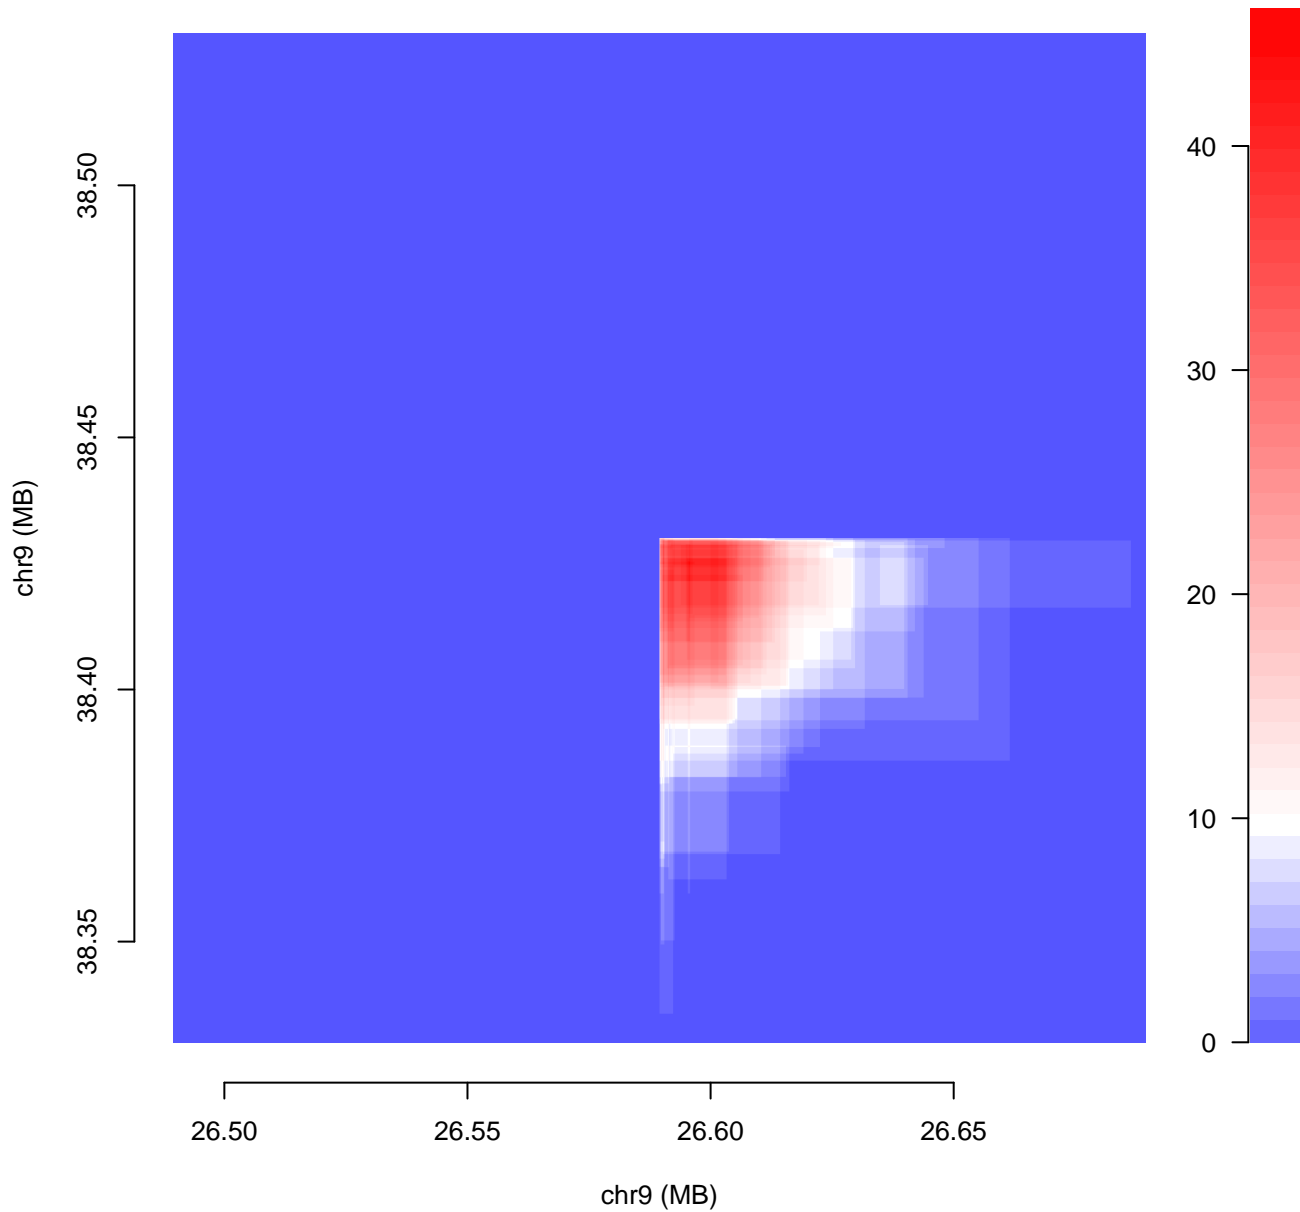

Supplement: Supplemental_Data.zip [file event_356.pdf › event_356.pdf]

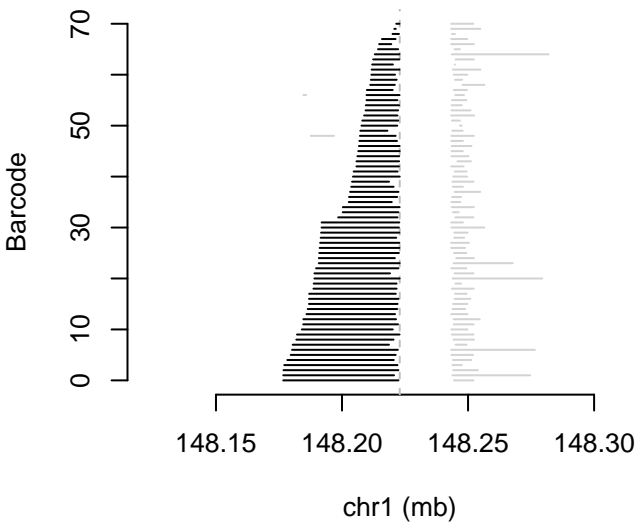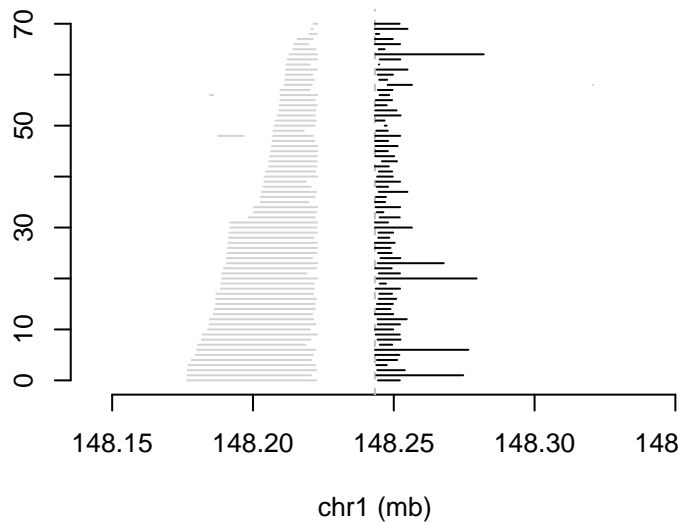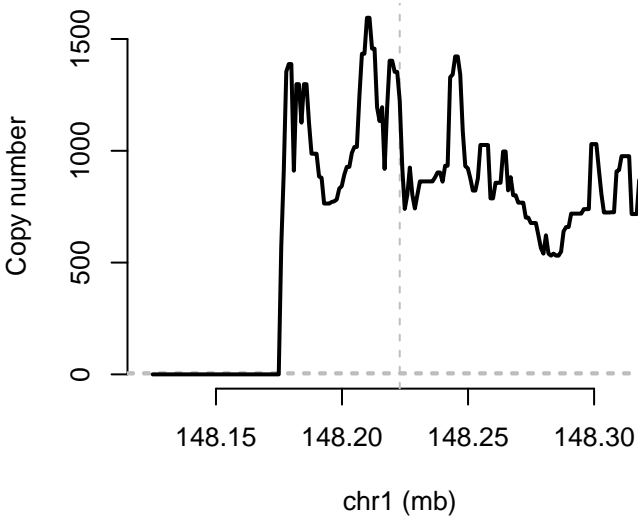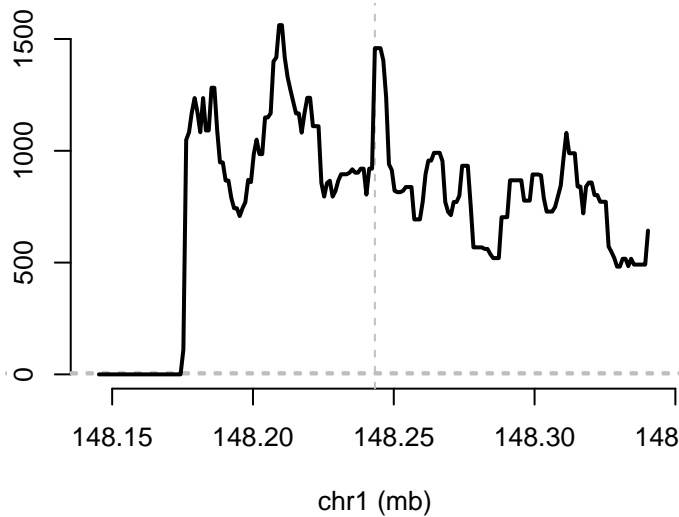

K562 chr1:148,243,292::chr1:148,222,901-+

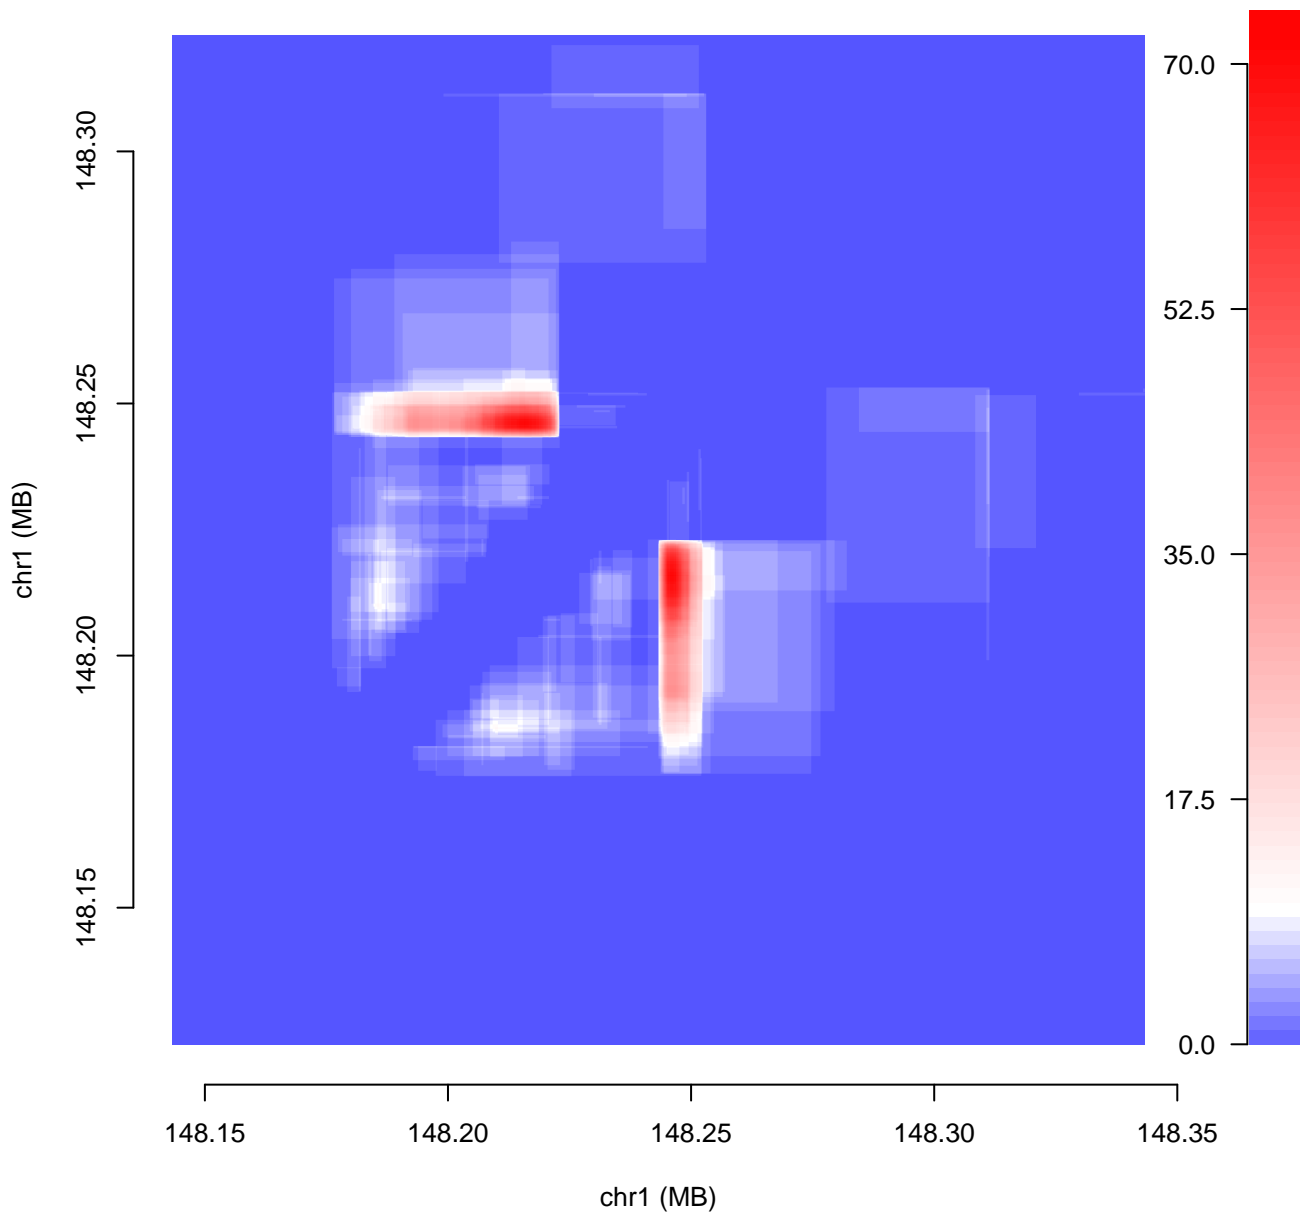

Supplement: Supplemental_Data.zip [file event_357.pdf › event_357.pdf]

Barcode

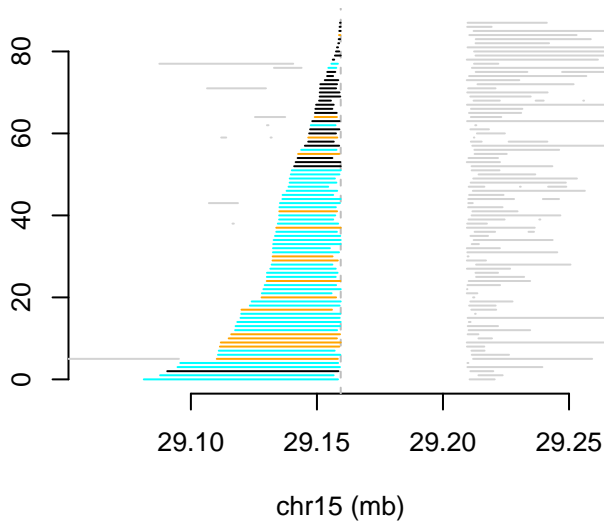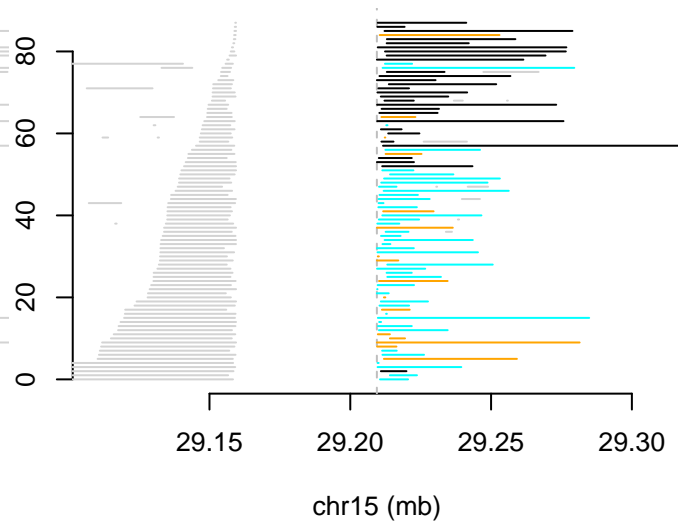

Copy number

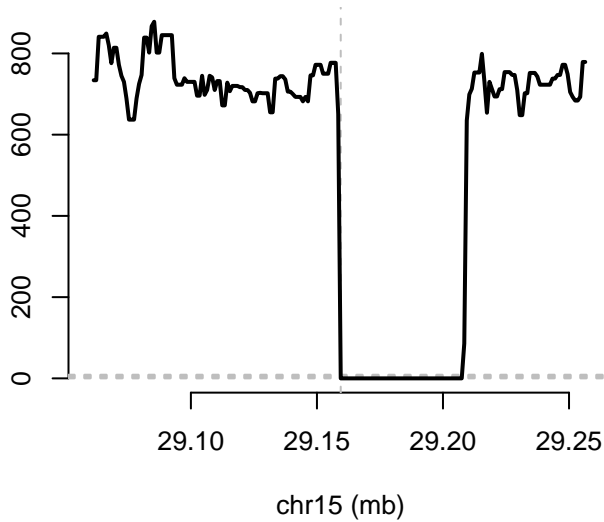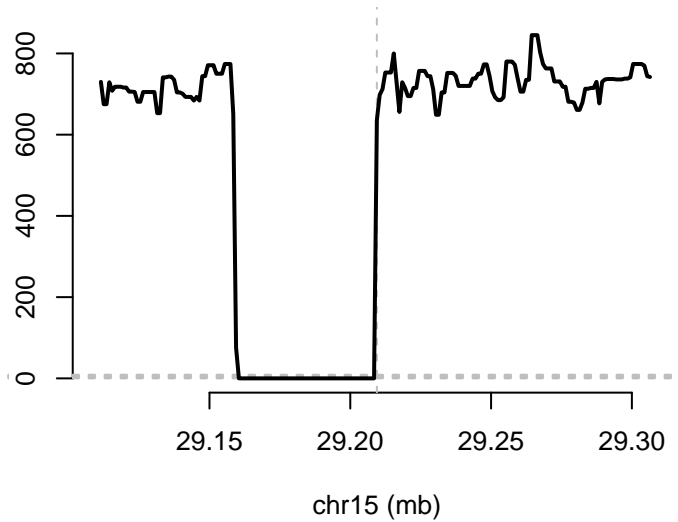

K562 chr15:29,159,443::chr15:29,209,441+-

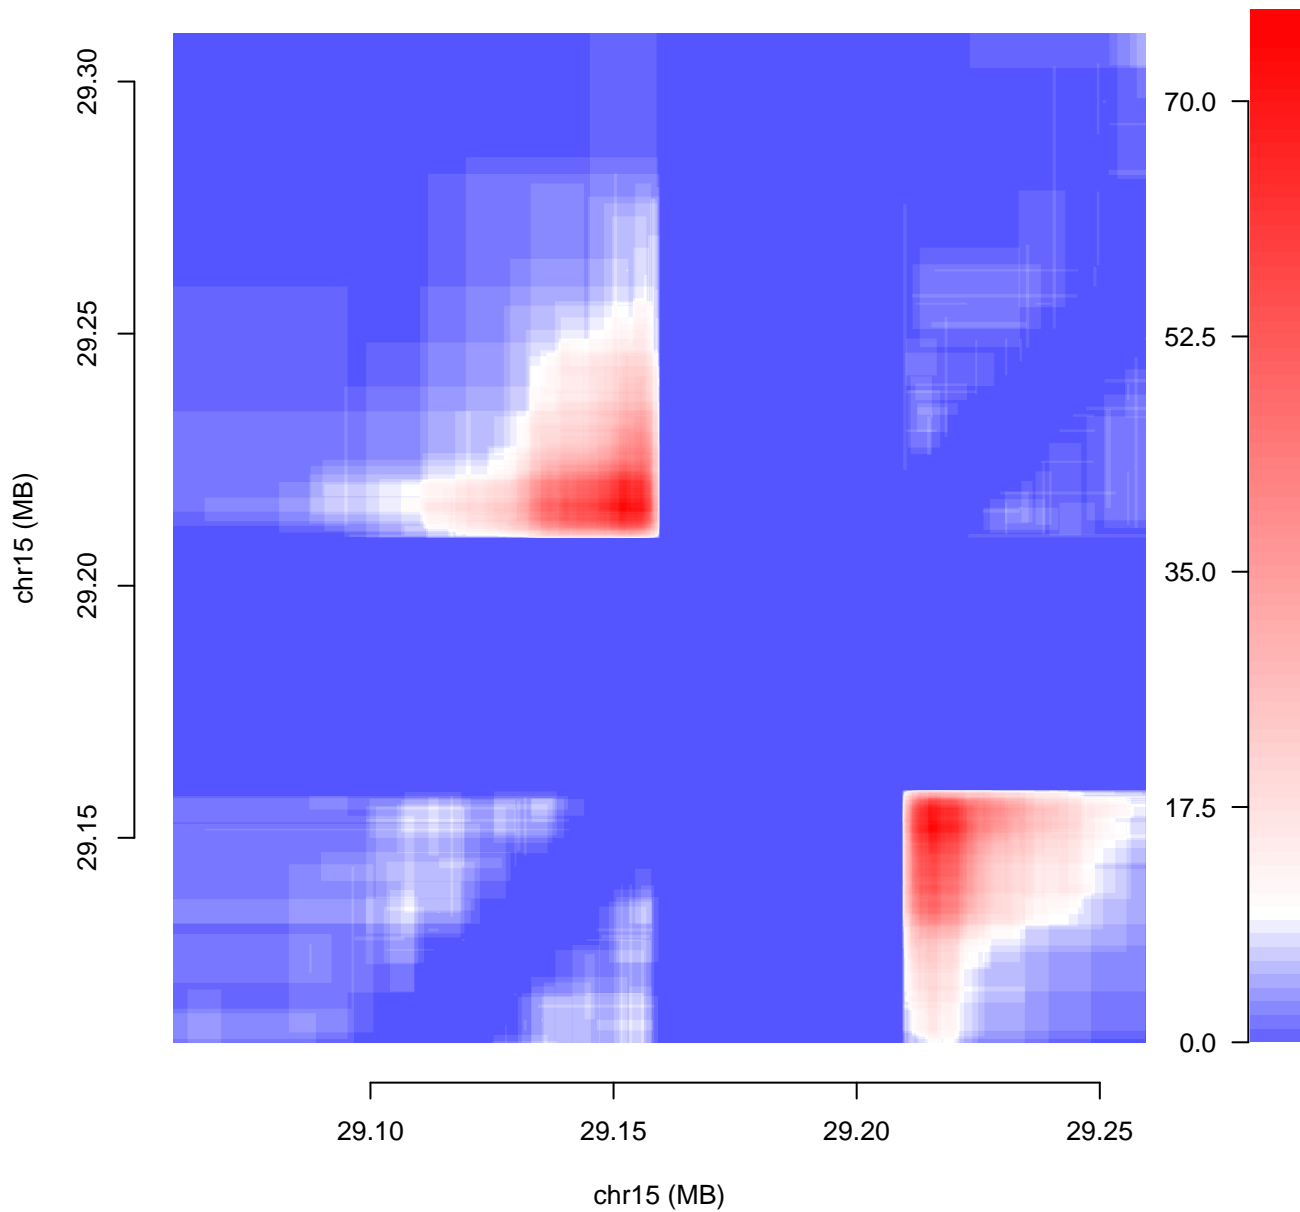

Supplement: Supplemental_Data.zip [file event_358.pdf › event_358.pdf]

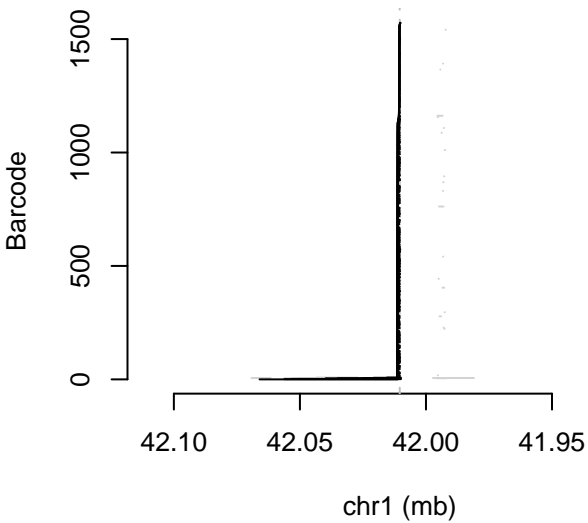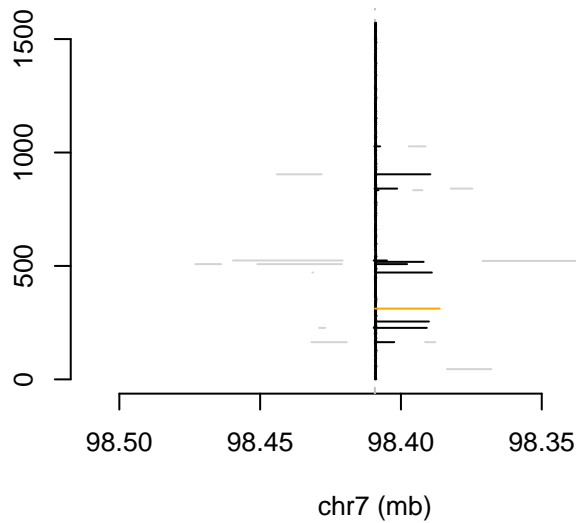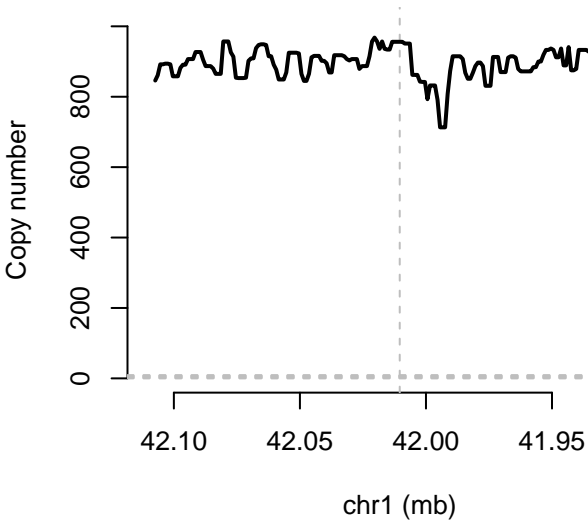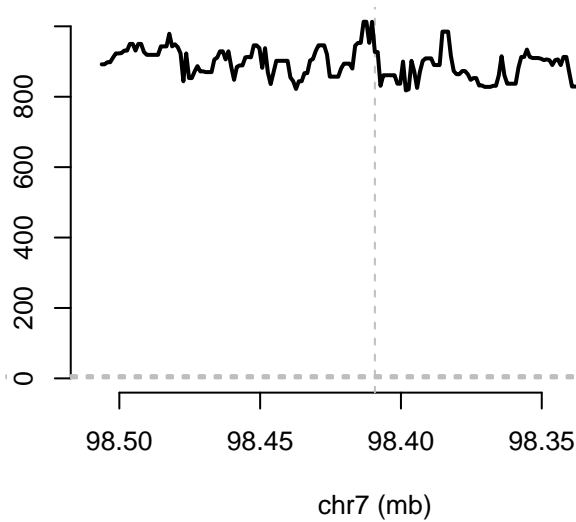

K562 chr1:42,010,401::chr7:98,409,261-+

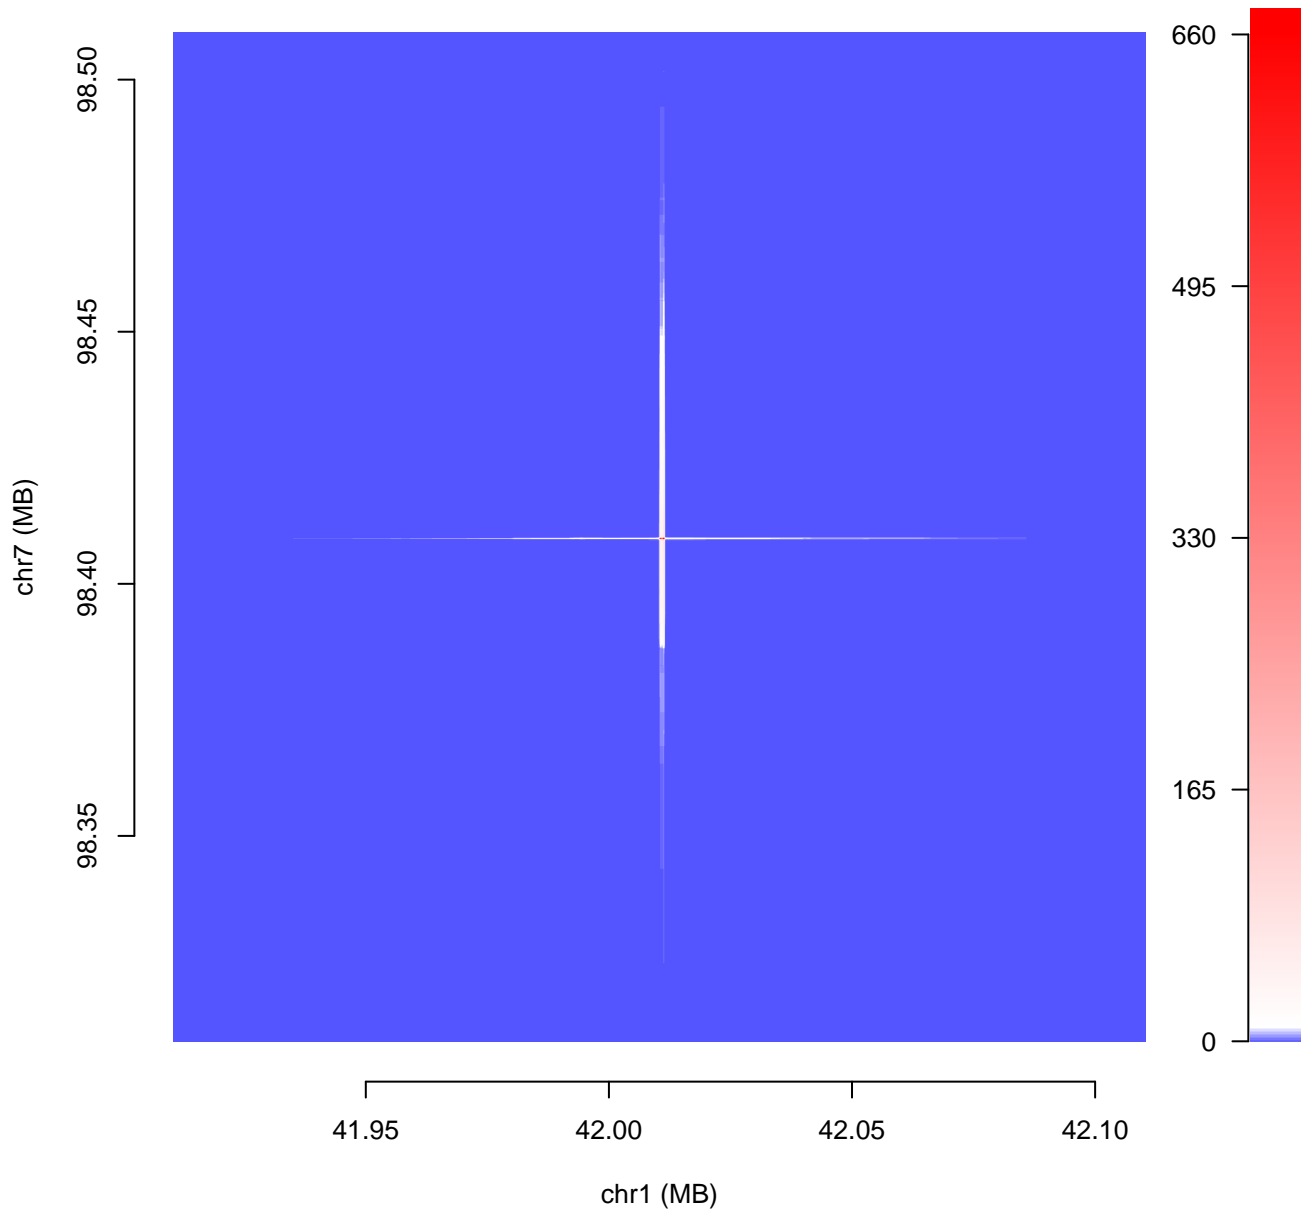

Supplement: Supplemental_Data.zip [file event_359.pdf › event_359.pdf]

Barcode

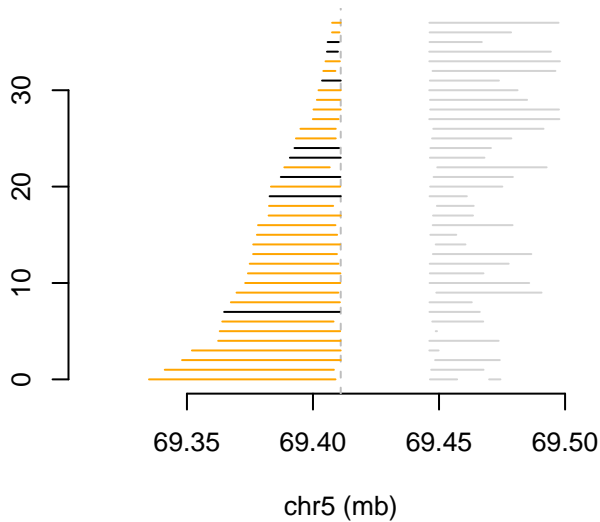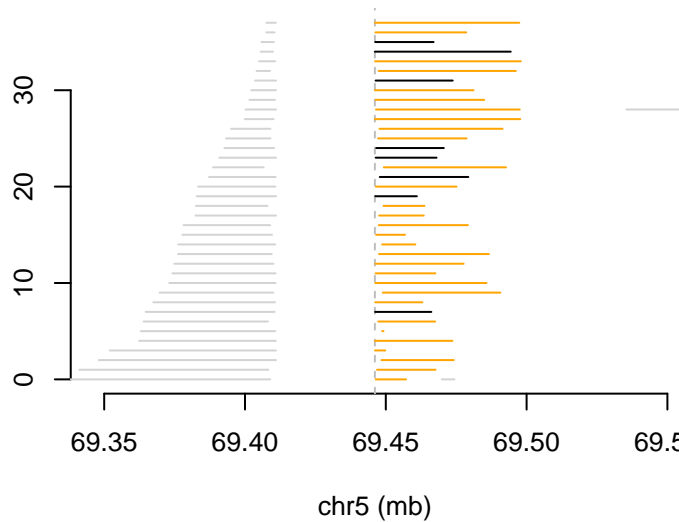

Copy number

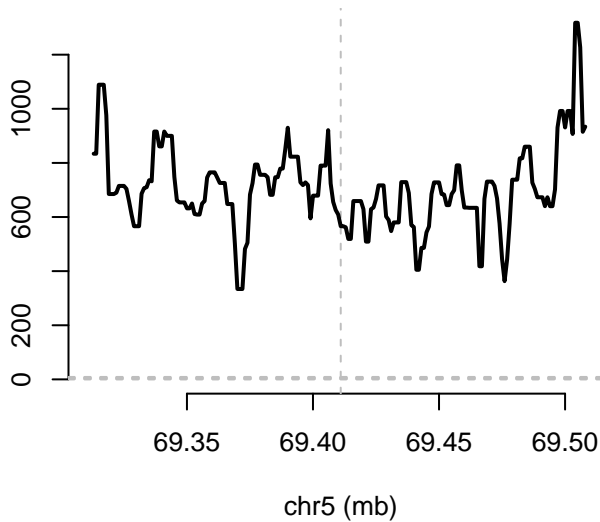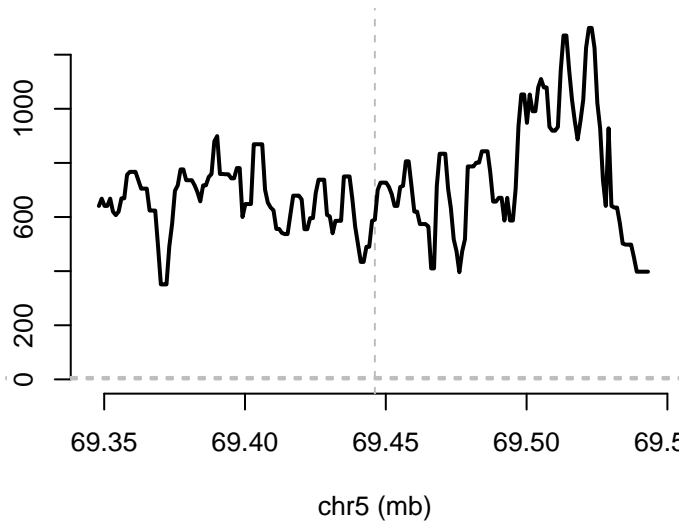

K562 chr5:69,446,115::chr5:69,411,014-+

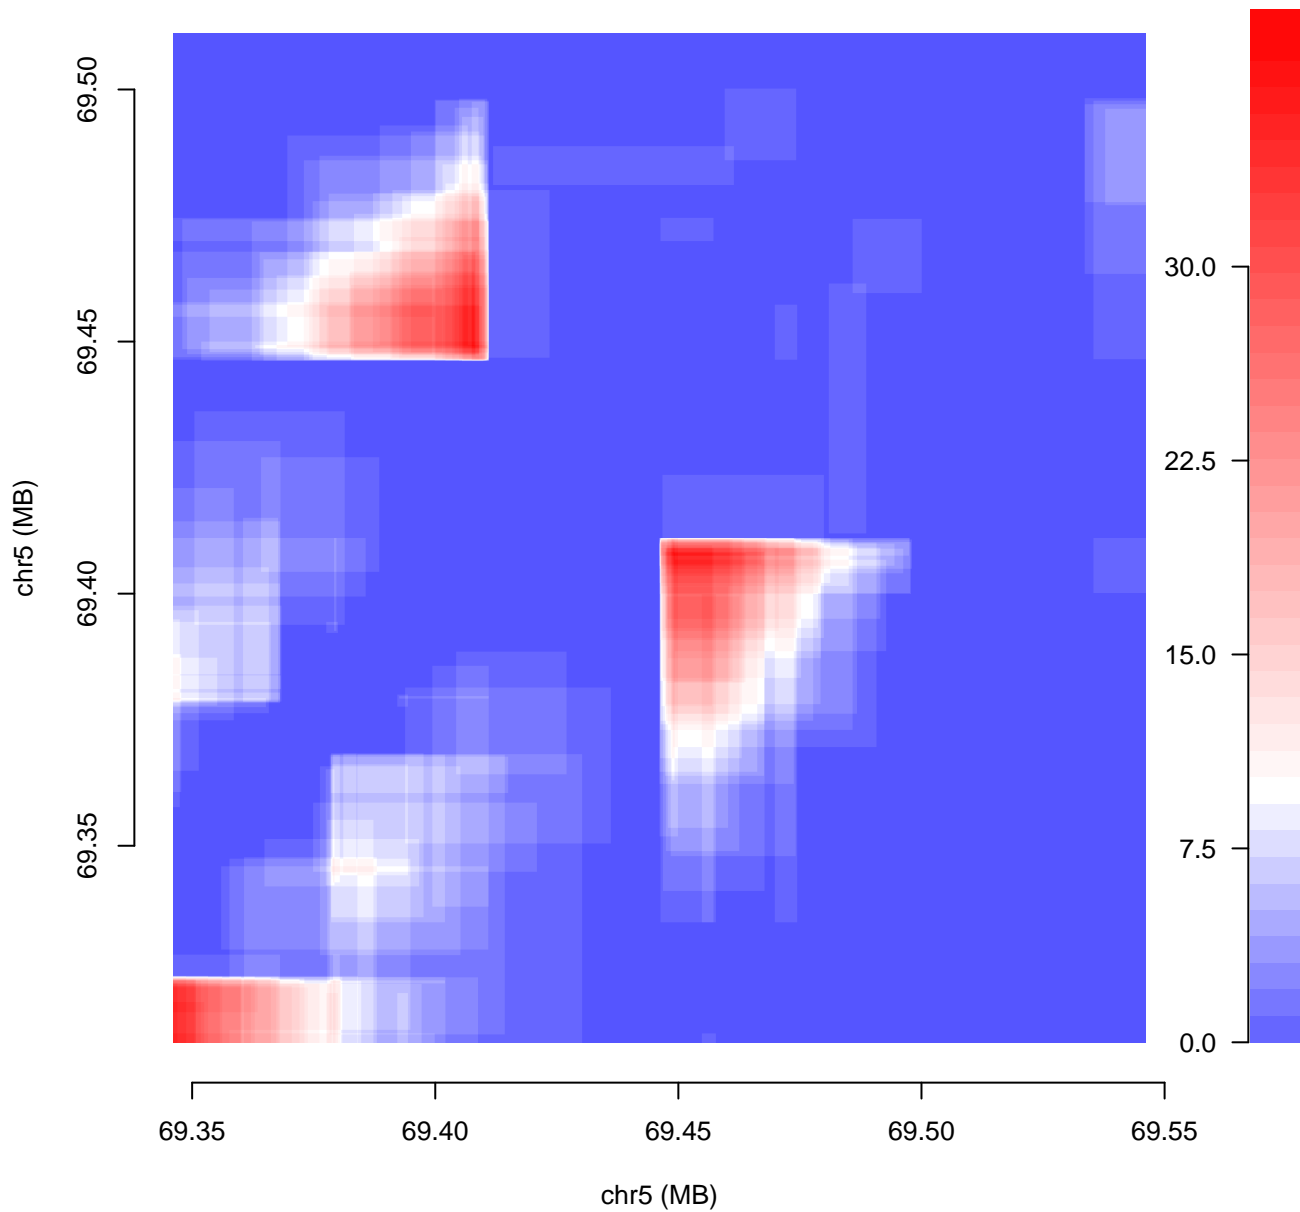

Supplement: Supplemental_Data.zip [file event_36.pdf › event_36.pdf]

Barcode

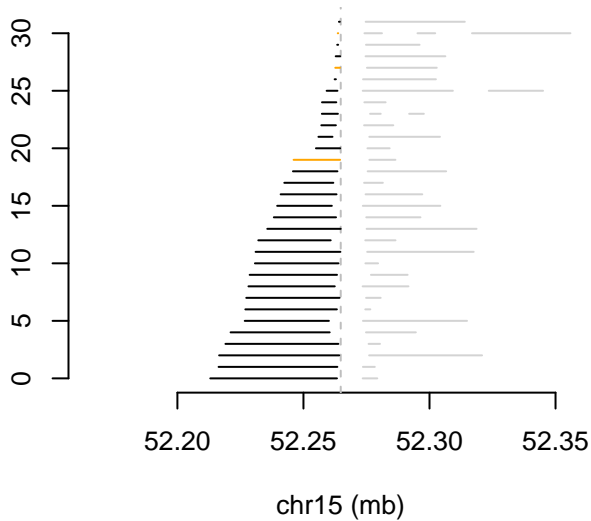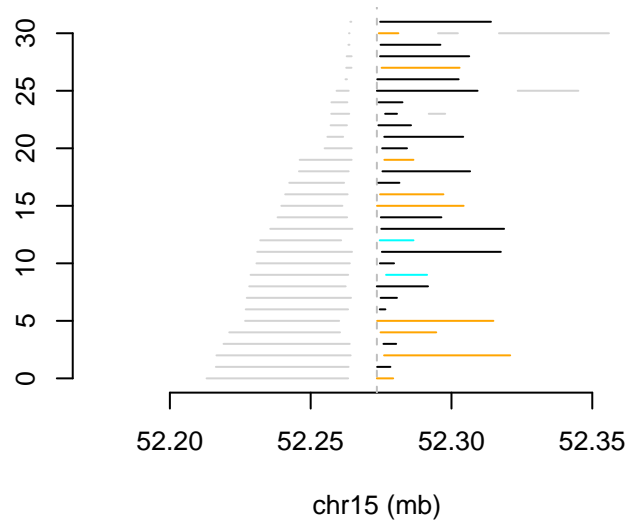

Copy number

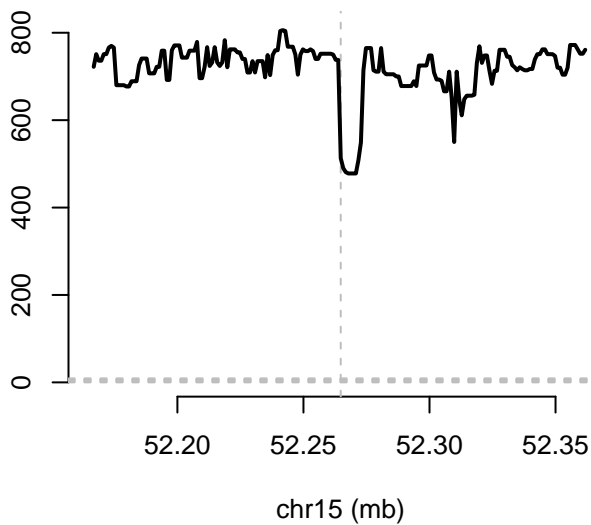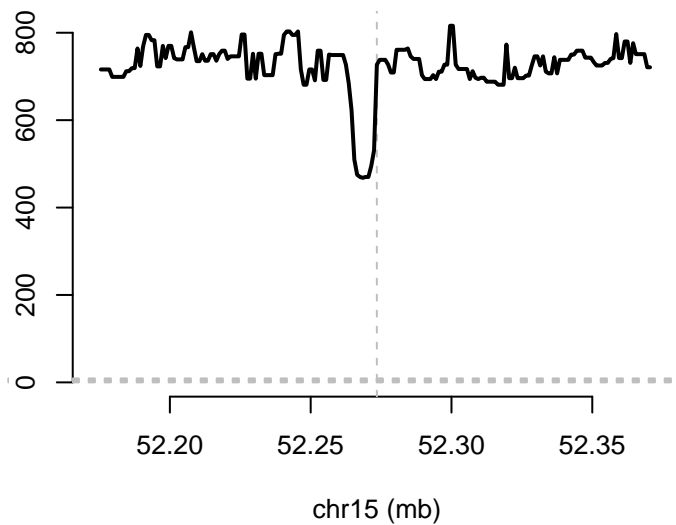

K562 chr15:52,273,503::chr15:52,264,794-+

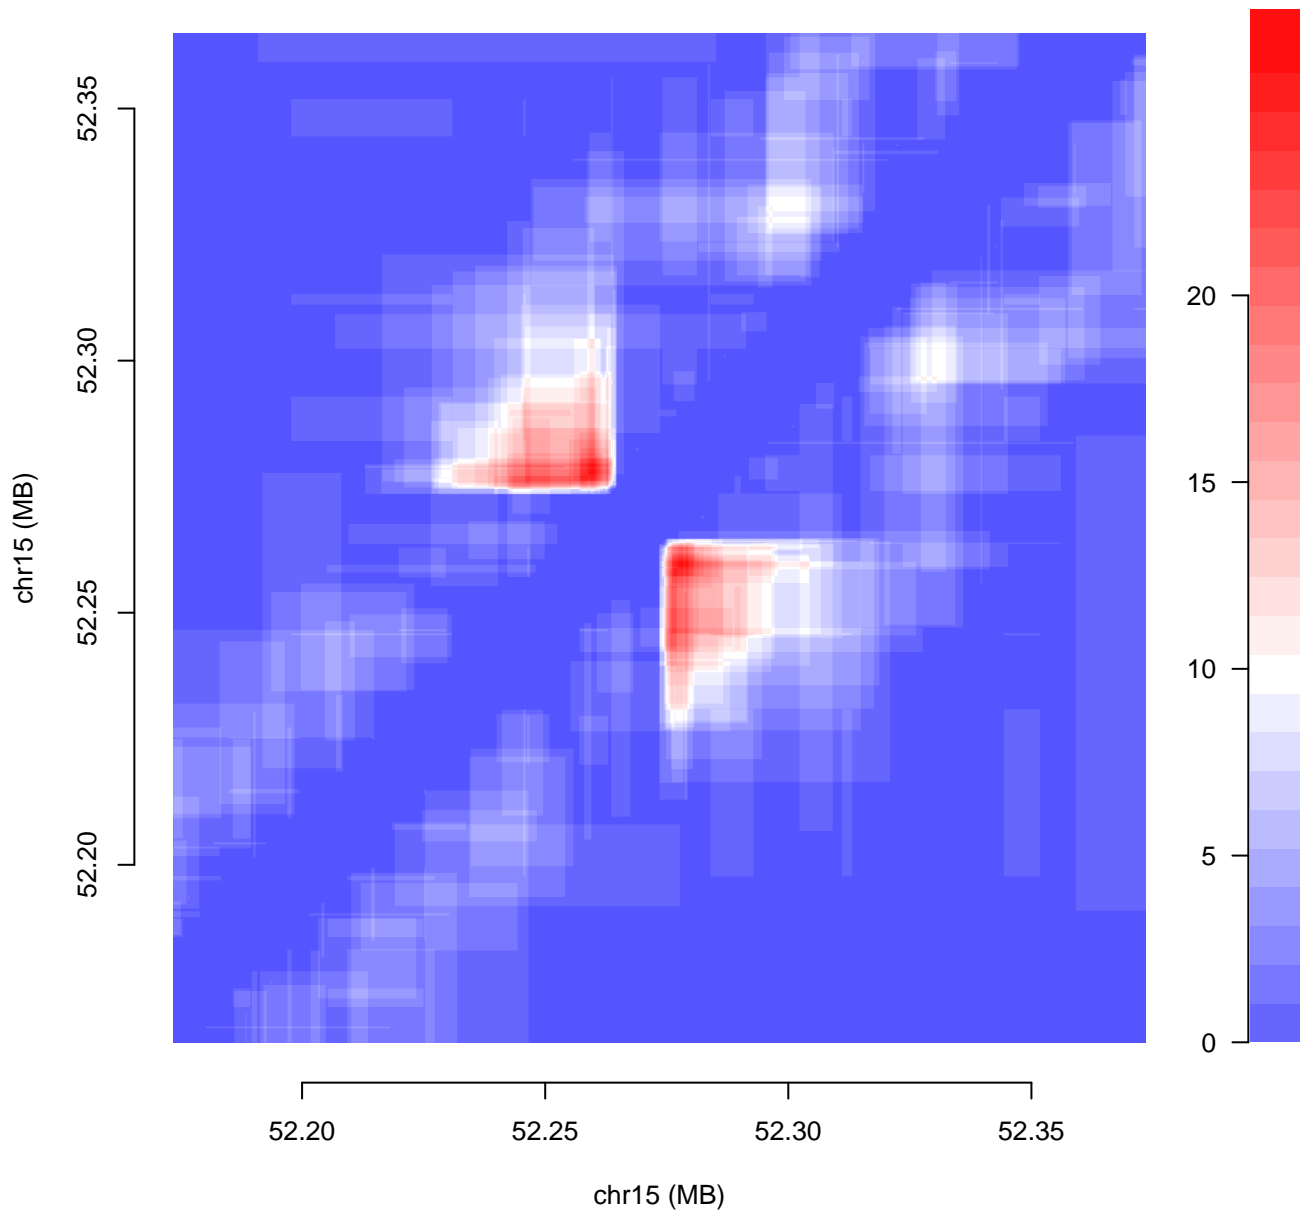

Supplement: Supplemental_Data.zip [file event_360.pdf › event_360.pdf]

Barcode

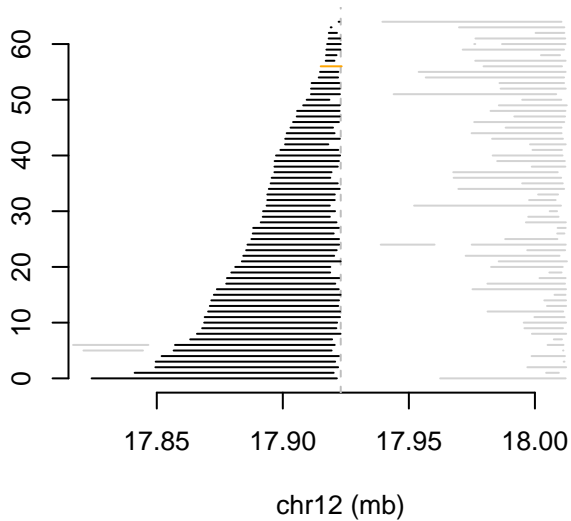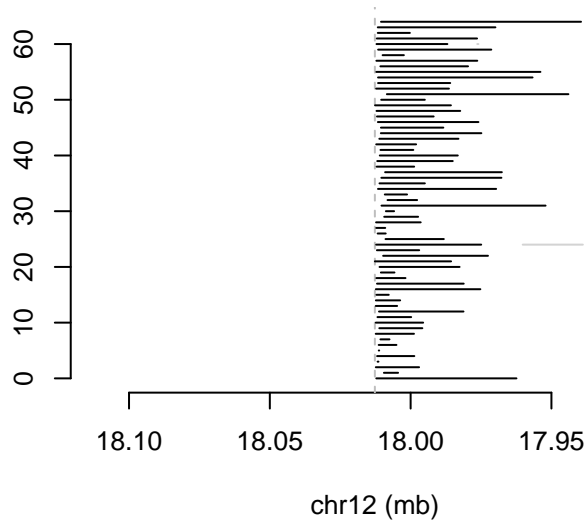

Copy number

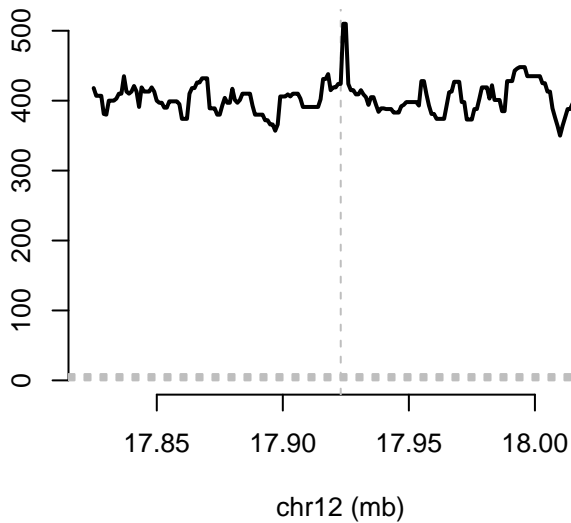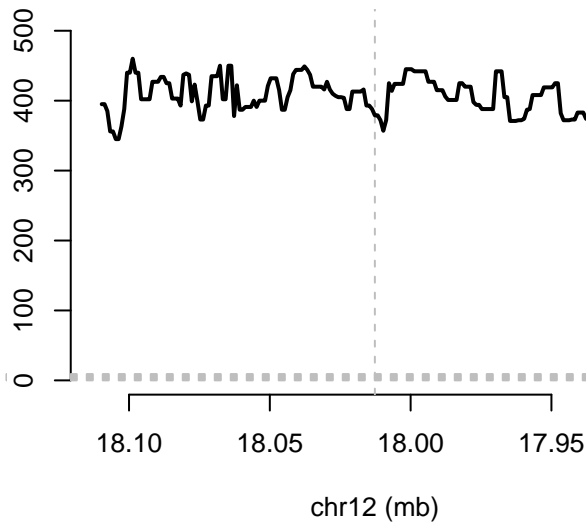

K562 chr12:17,922,975::chr12:18,012,700++

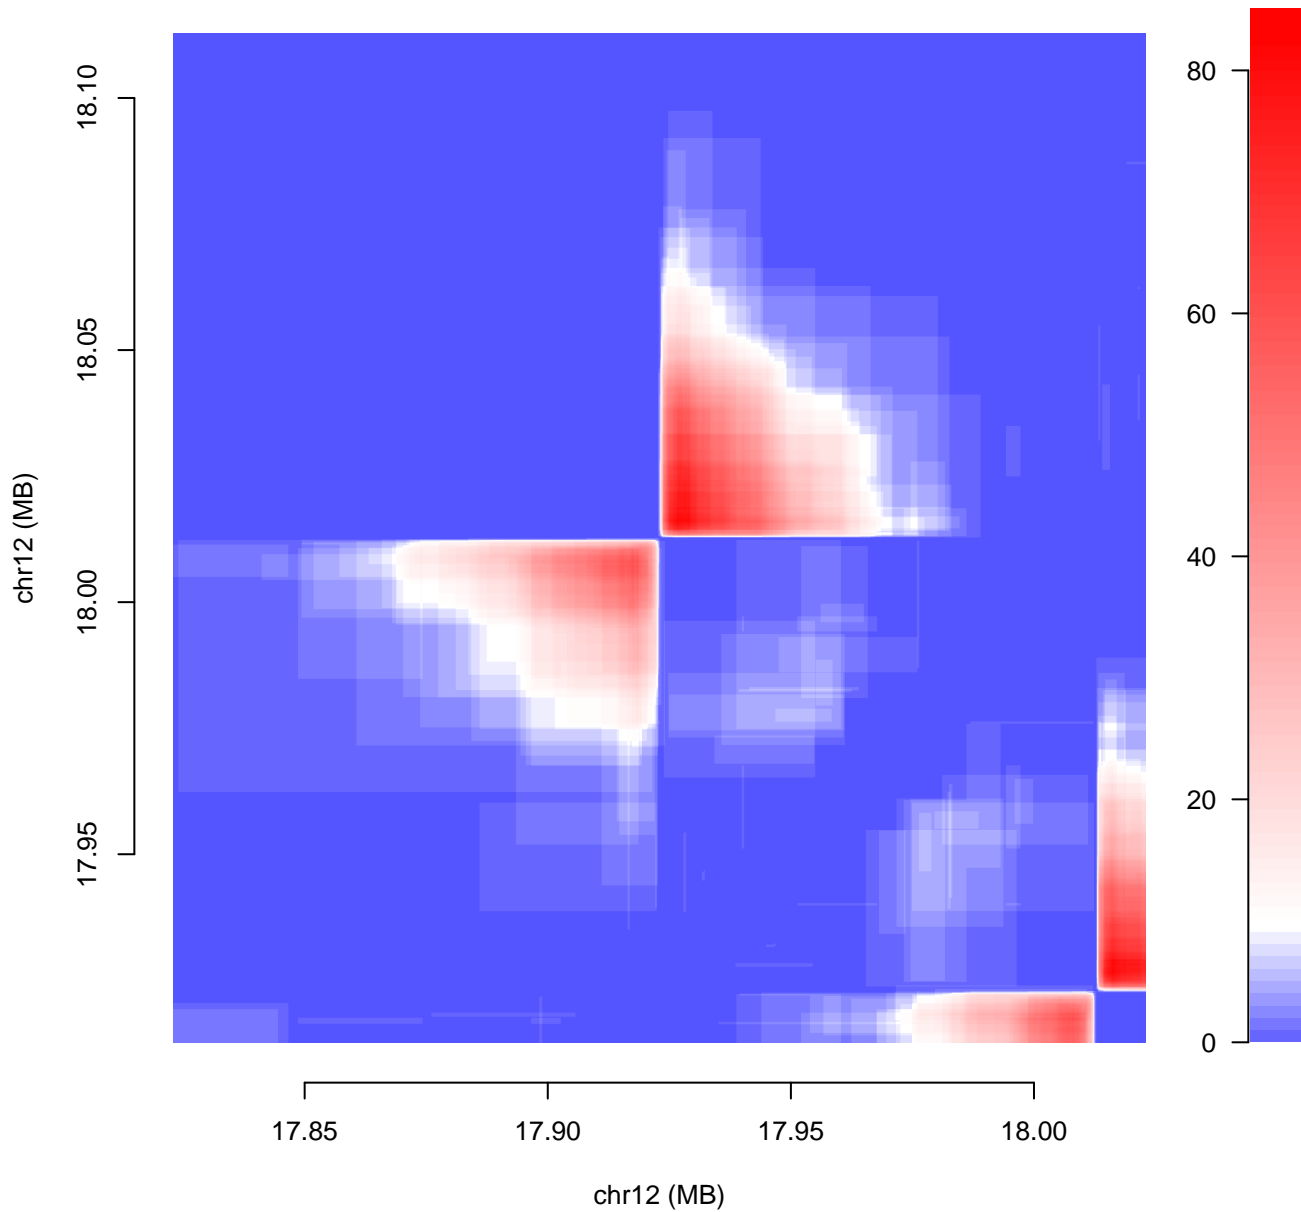

Supplement: Supplemental_Data.zip [file event_361.pdf › event_361.pdf]

Barcode

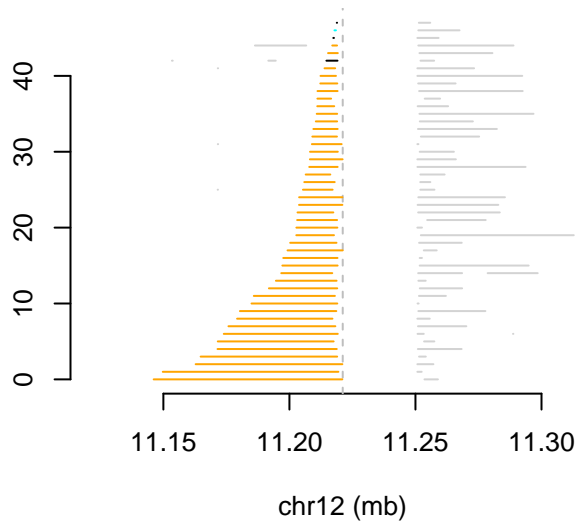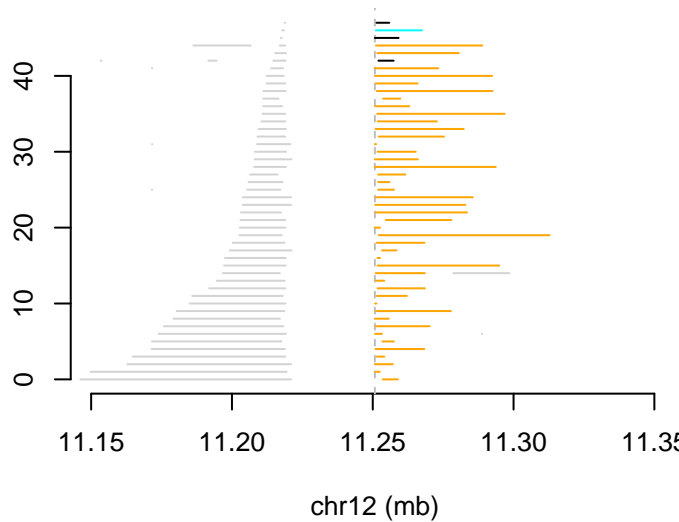

Copy number

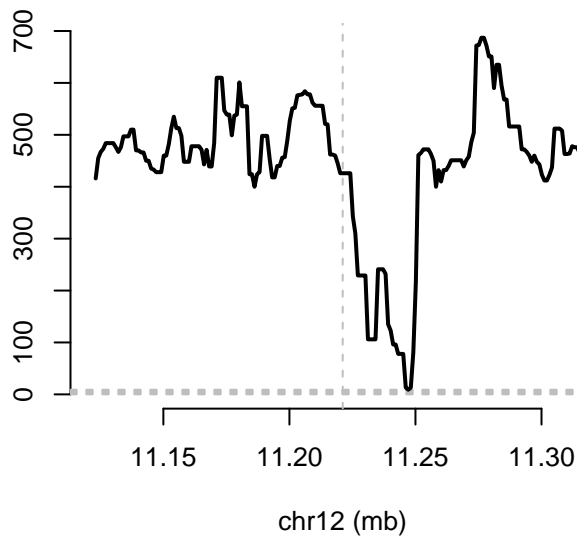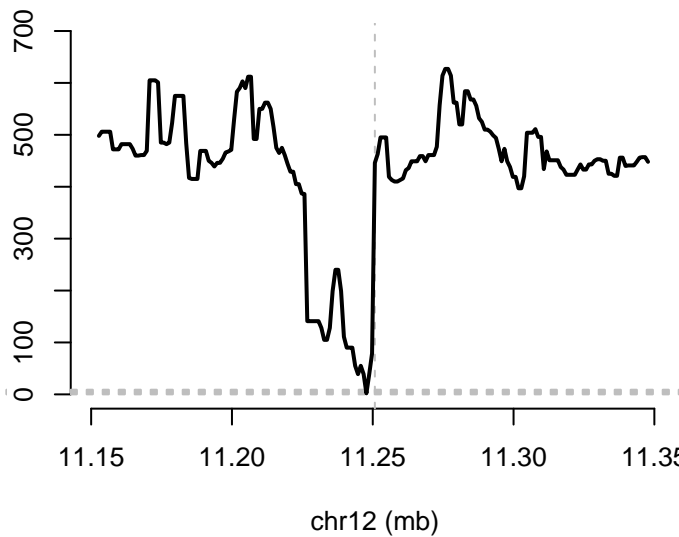

K562 chr12:11,250,748::chr12:11,221,154-+

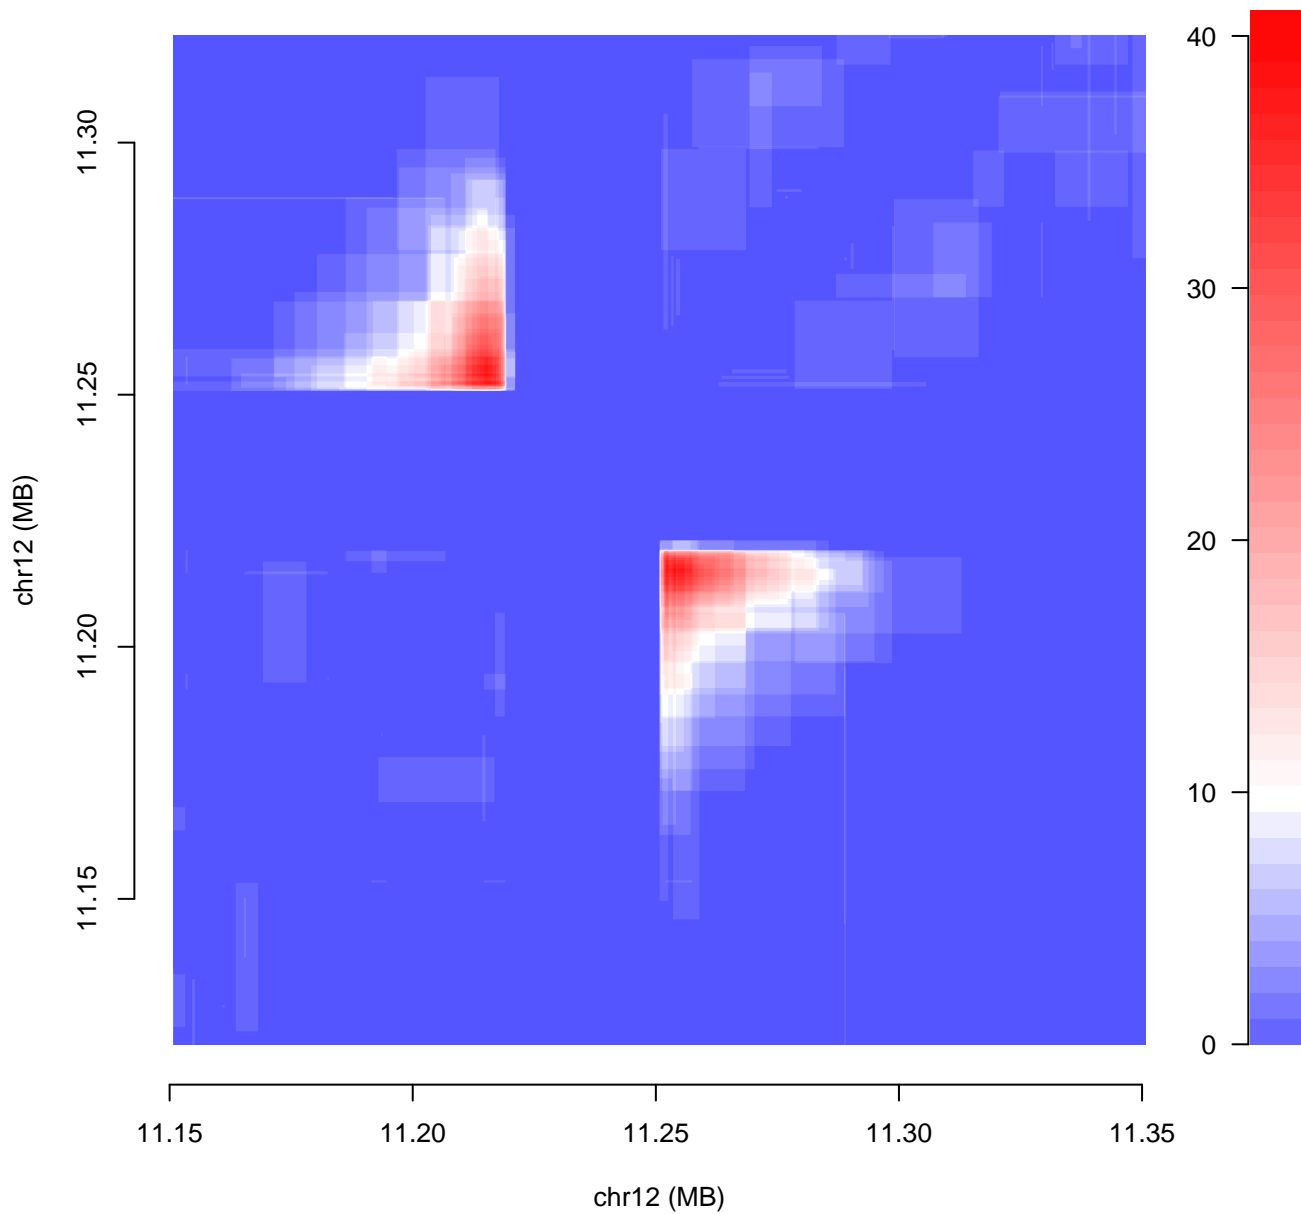

Supplement: Supplemental_Data.zip [file event_362.pdf › event_362.pdf]

Barcode

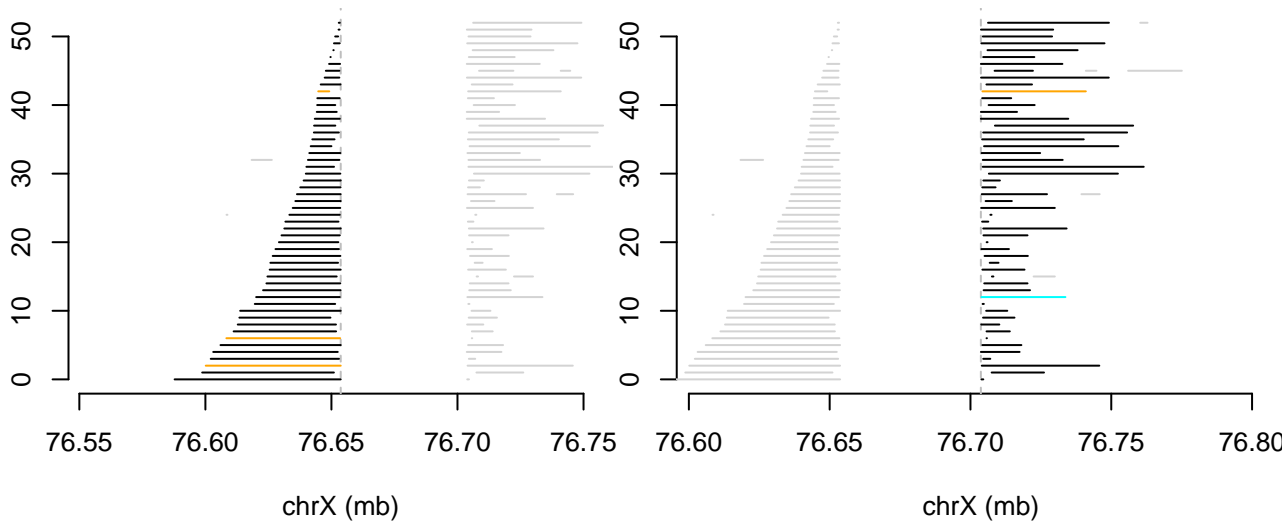

Copy number

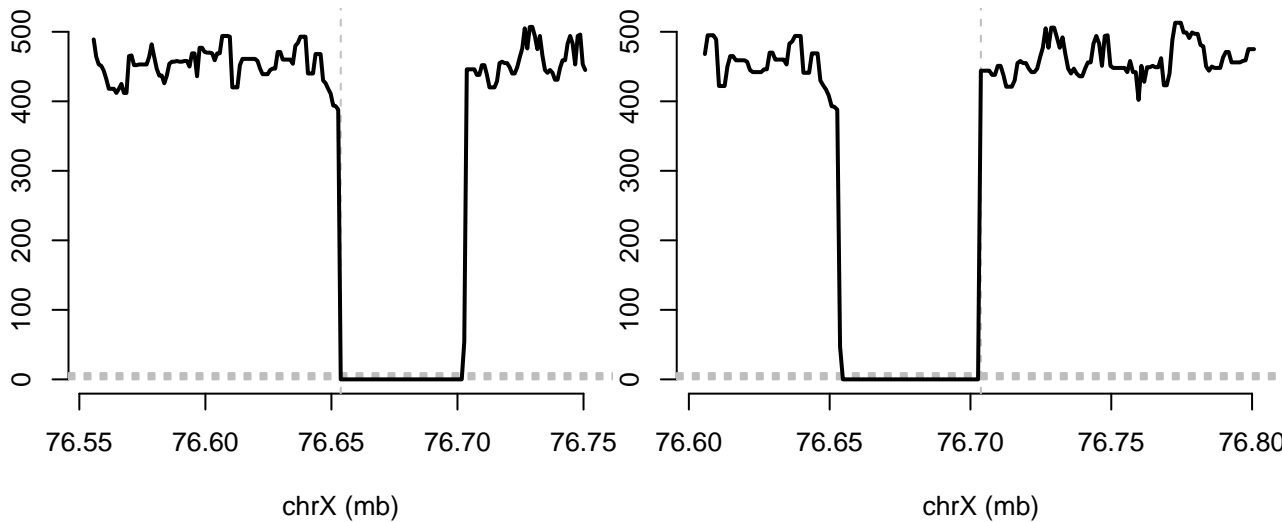

K562 chrX:76,703,691::chrX:76,653,694--+

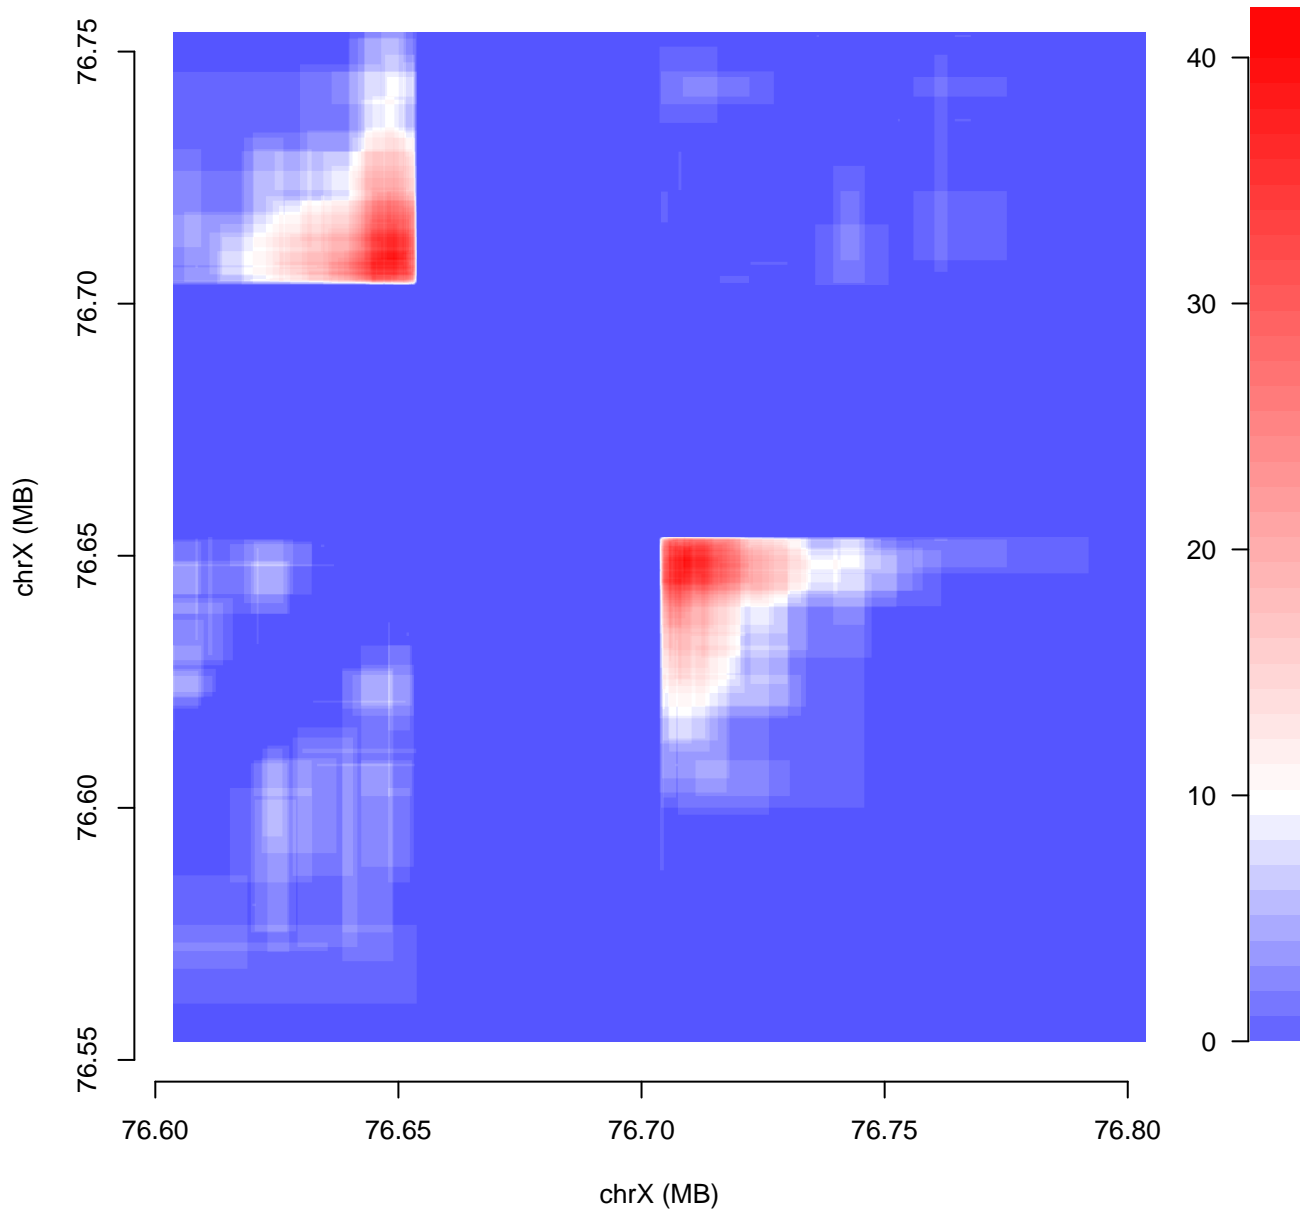

Supplement: Supplemental_Data.zip [file event_363.pdf › event_363.pdf]

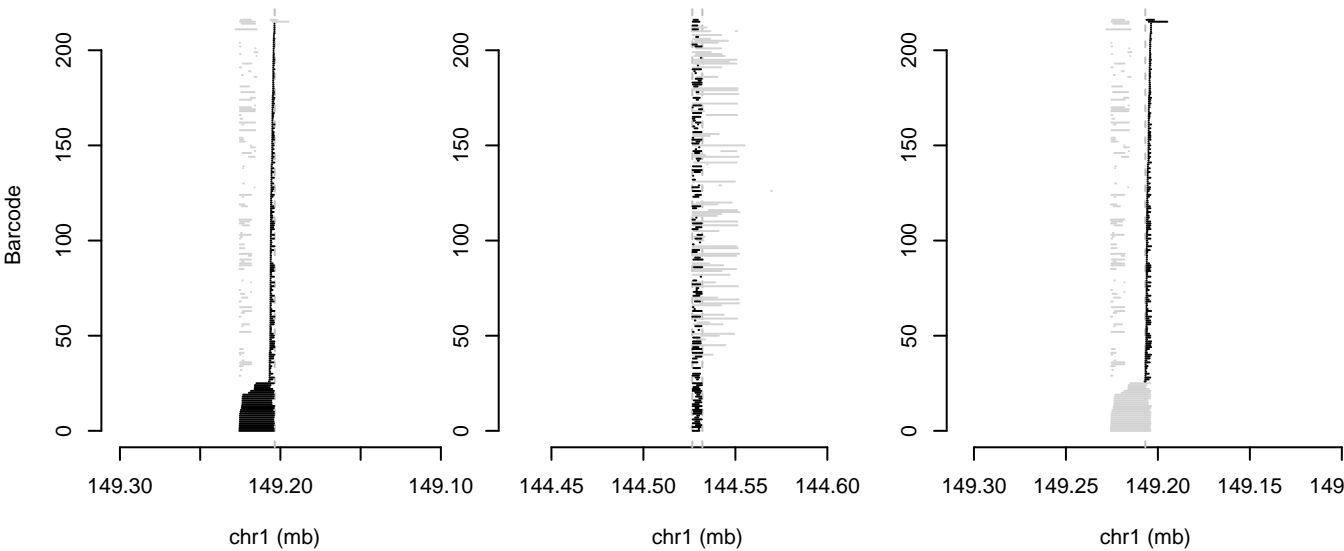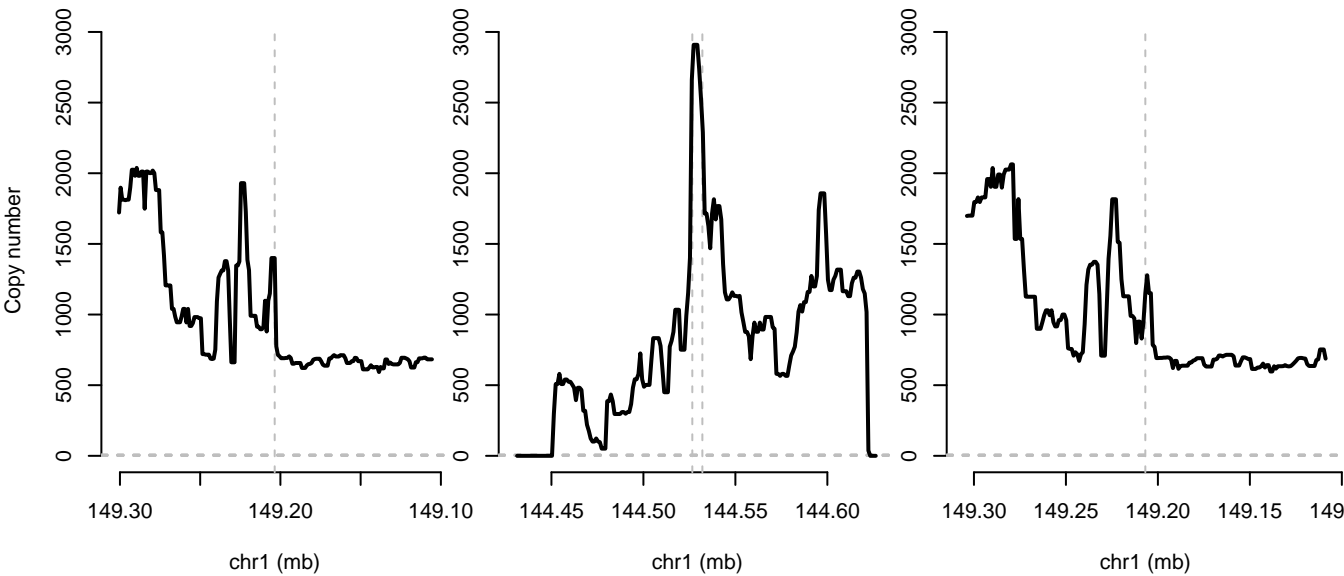

K562 chr1:149,206,821::chr1:144,532,045++

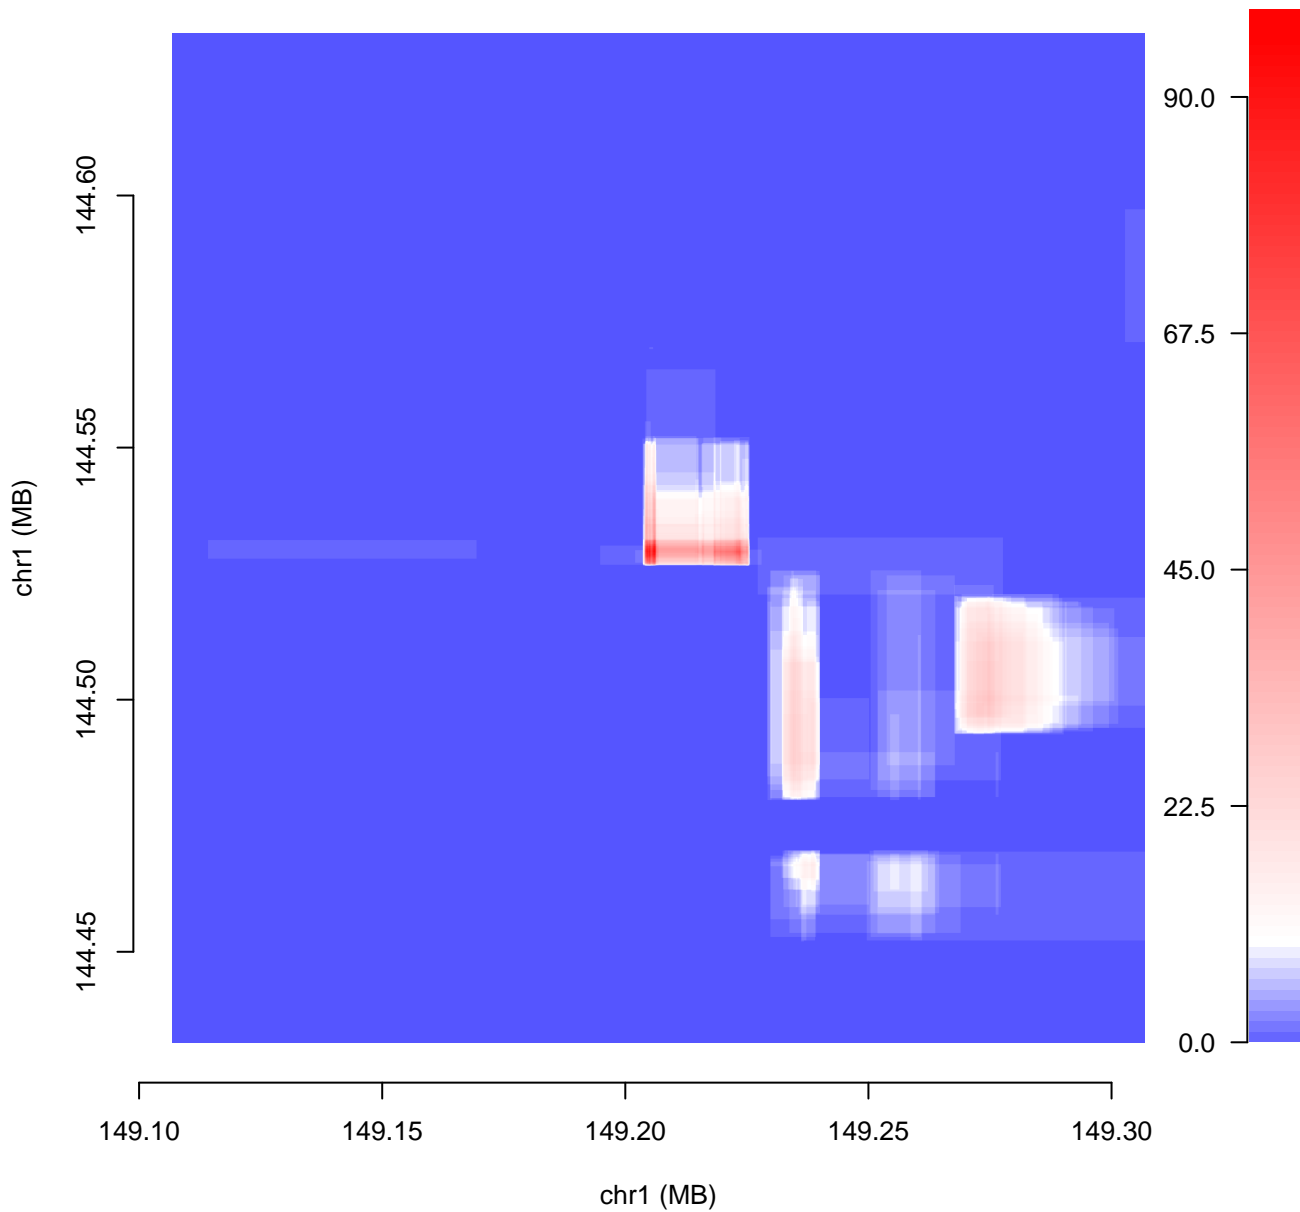

K562 chr1:149,203,567::chr1:144,526,592--

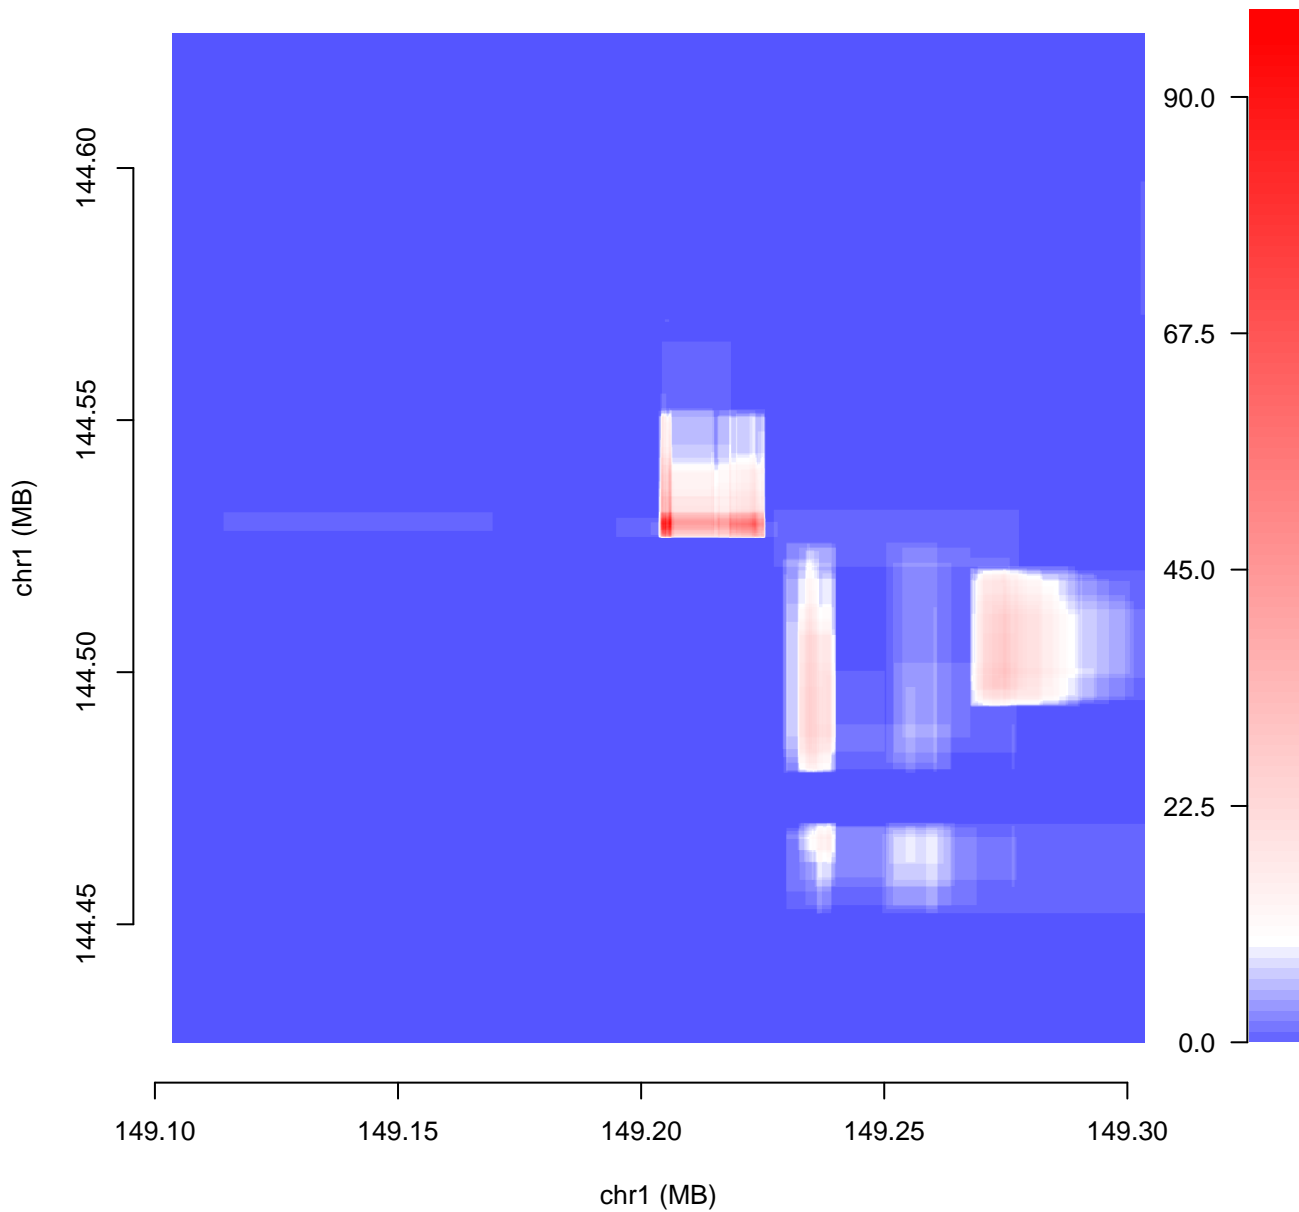

K562 chr1:144,526,592::chr1:144,532,045-+

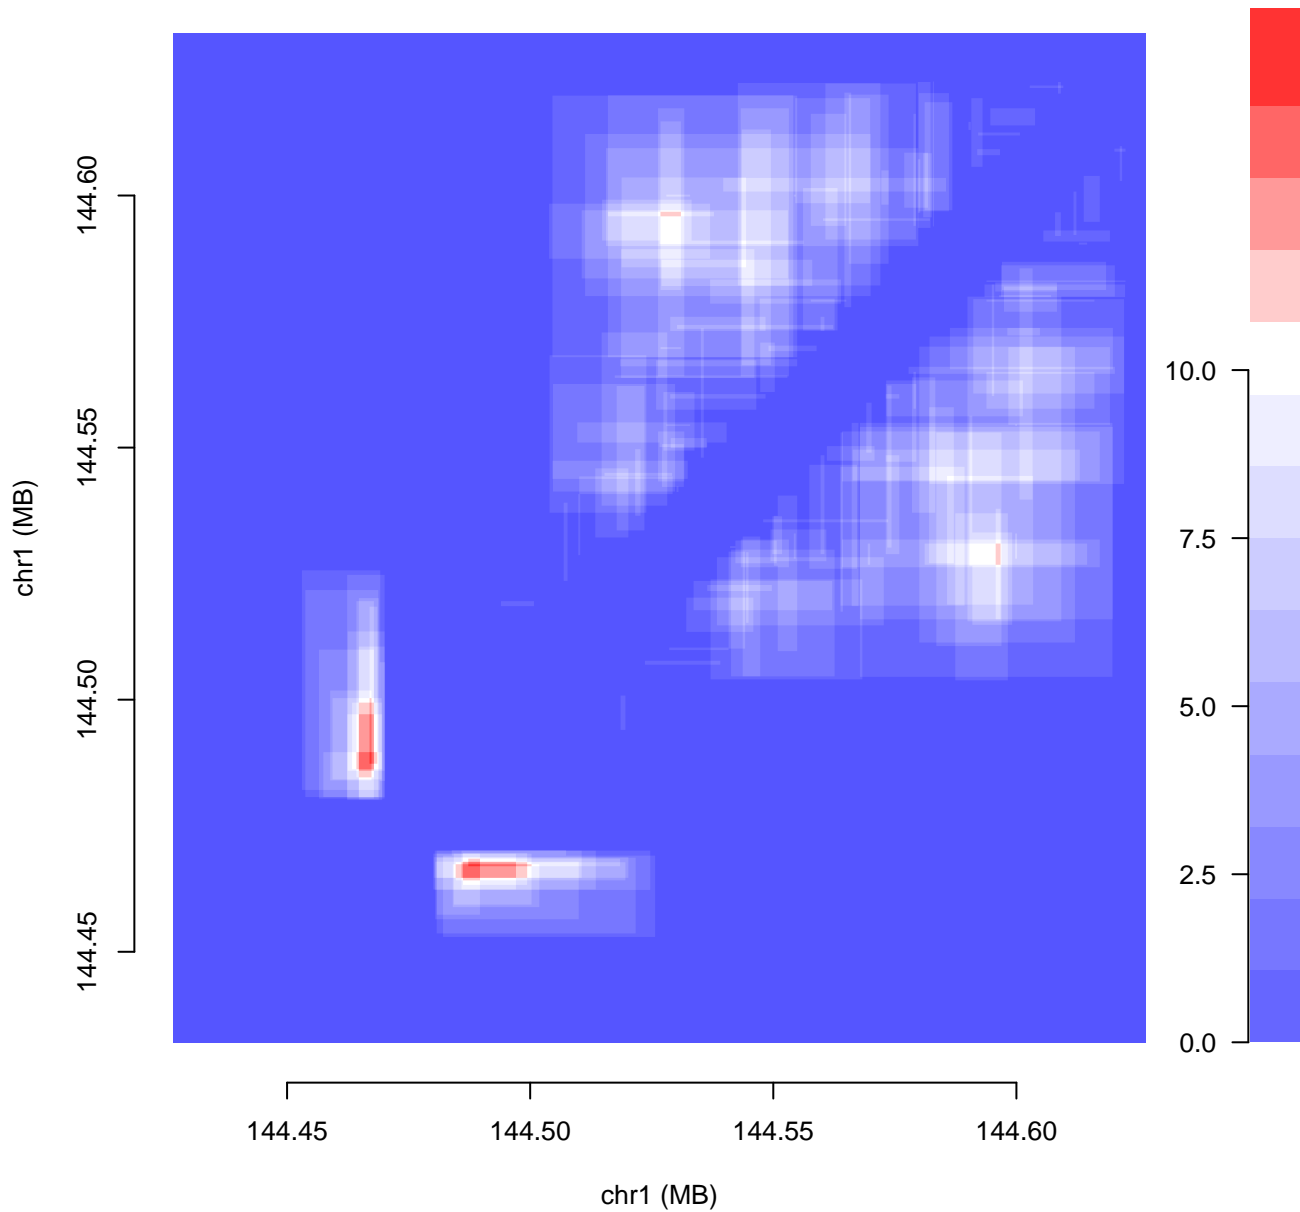

Supplement: Supplemental_Data.zip [file event_364.pdf › event_364.pdf]

Barcode

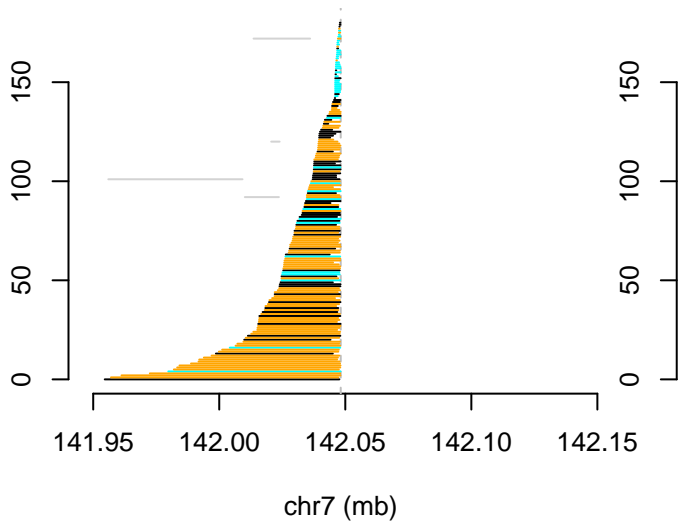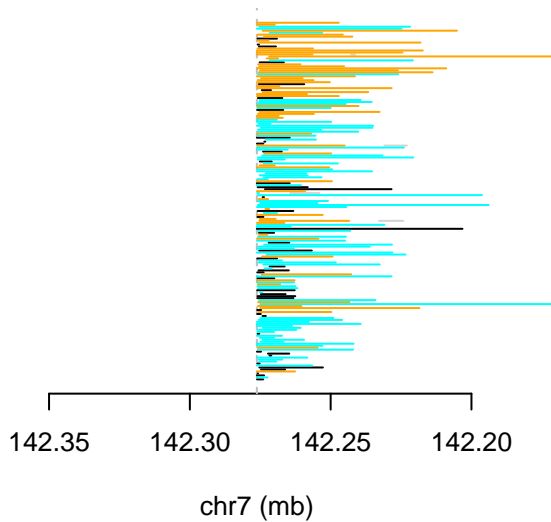

Copy number

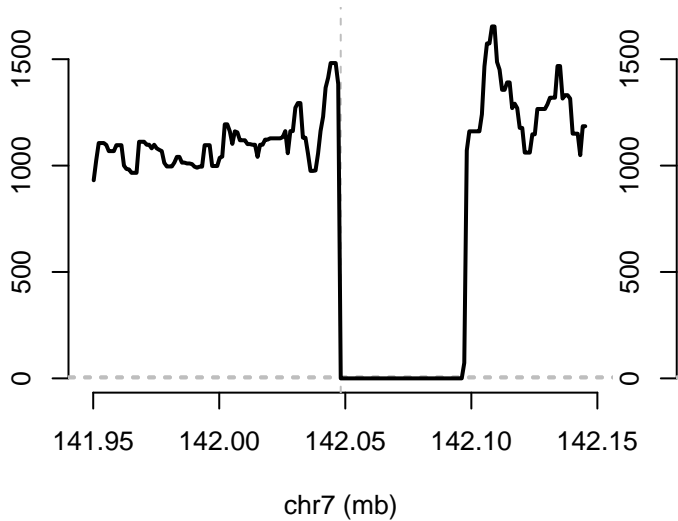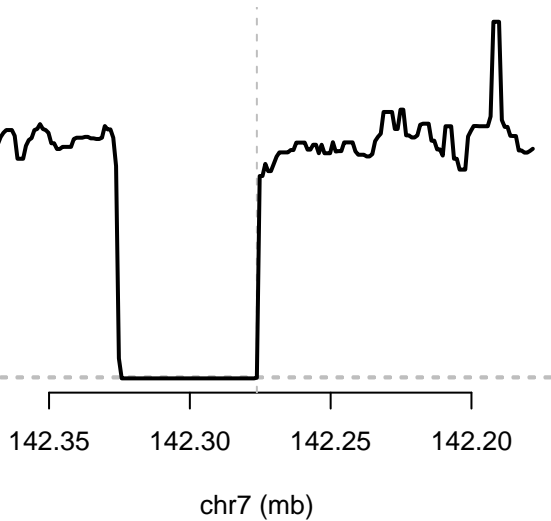

K562 chr7:142,048,197::chr7:142,276,197++

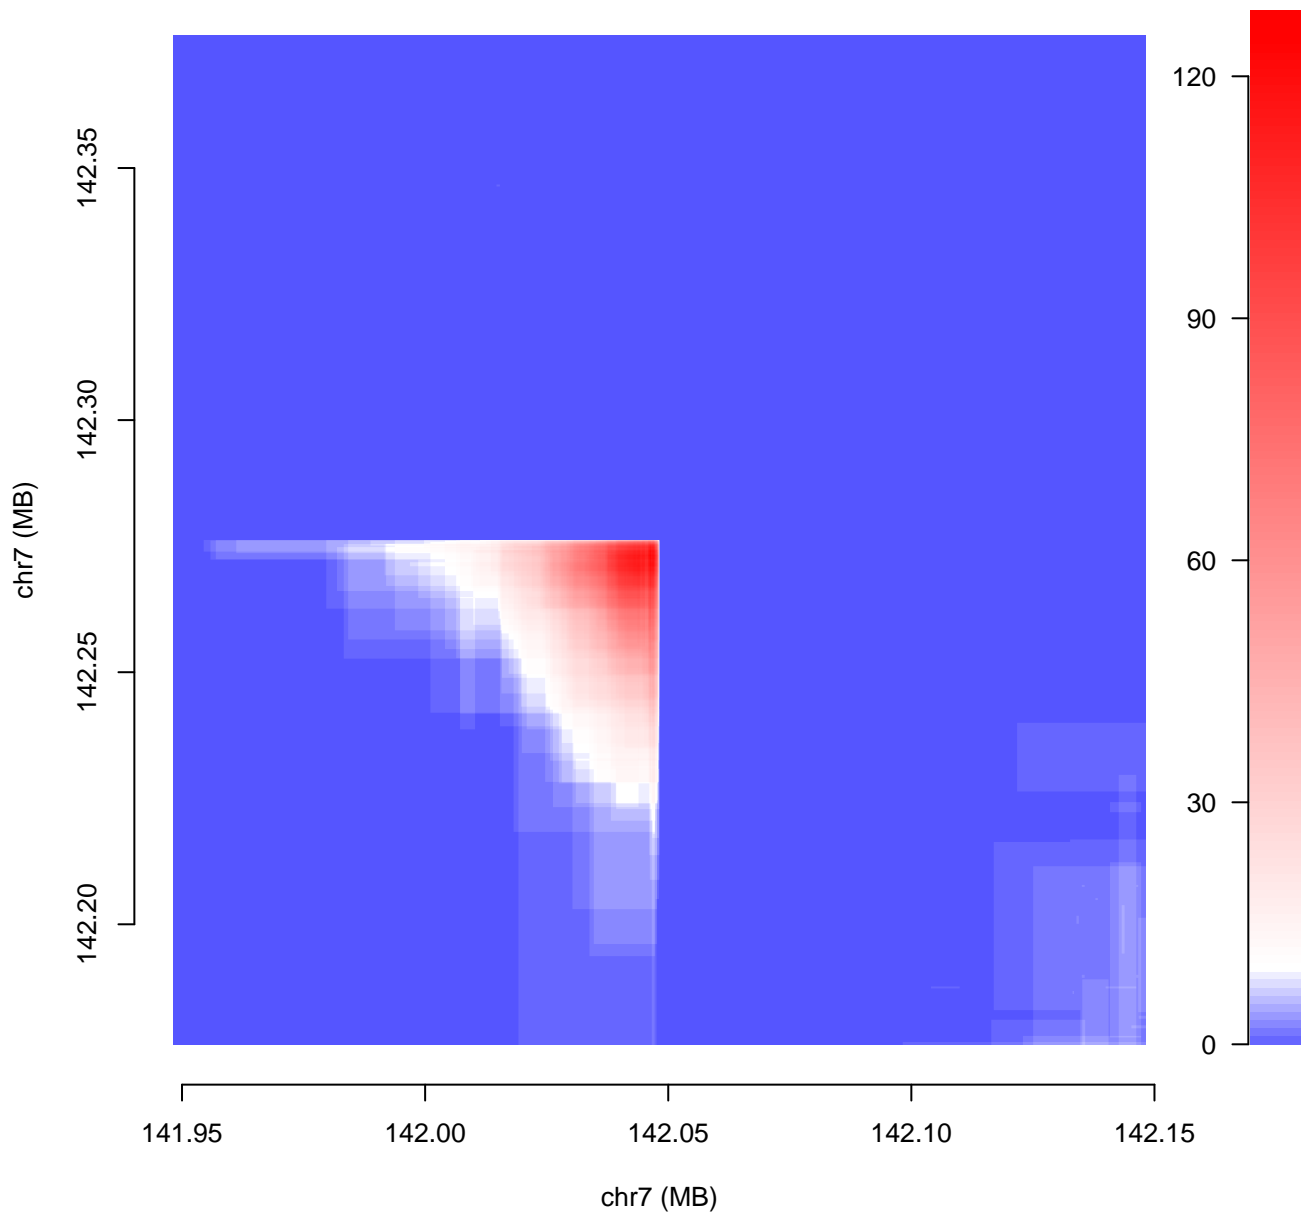

Supplement: Supplemental_Data.zip [file event_365.pdf › event_365.pdf]

Barcode

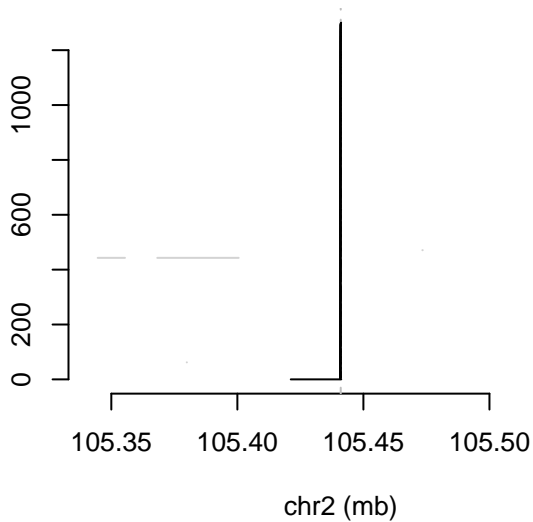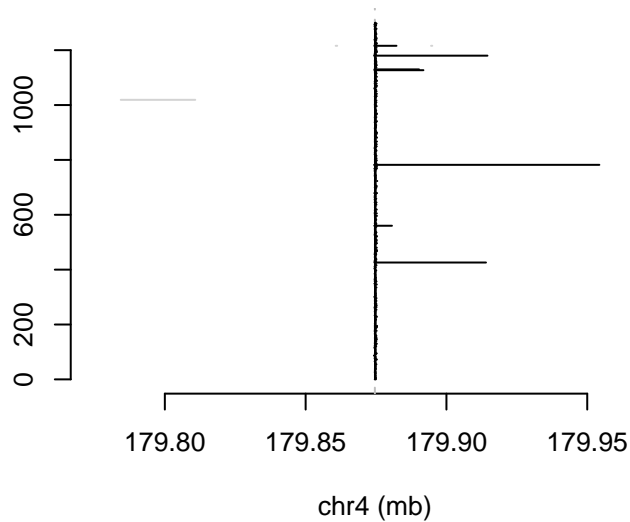

Copy number

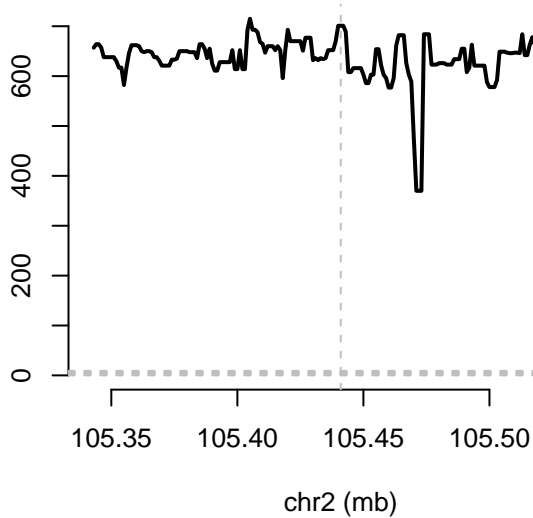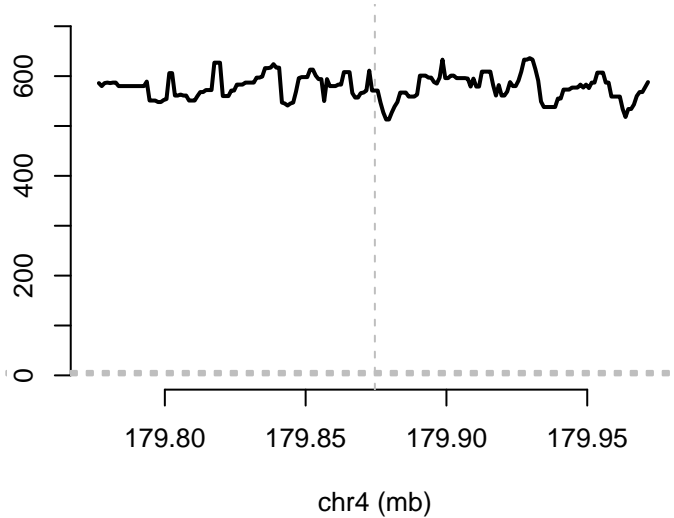

K562 chr4:179,874,583::chr2:105,441,008-+

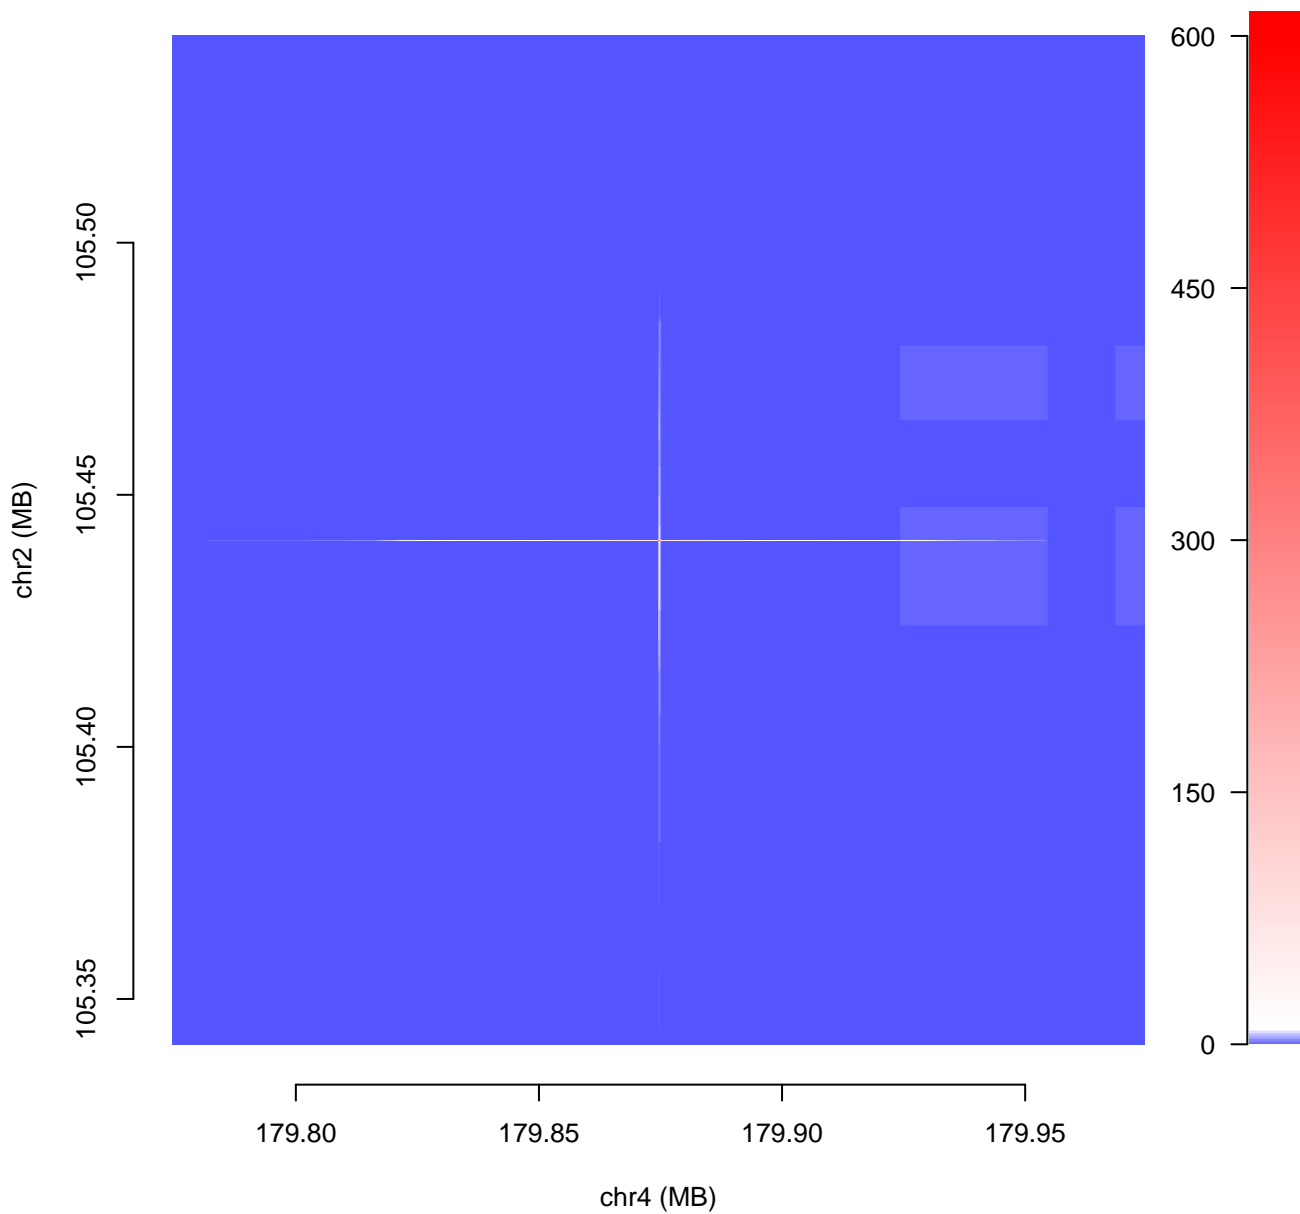

Supplement: Supplemental_Data.zip [file event_366.pdf › event_366.pdf]

Barcode

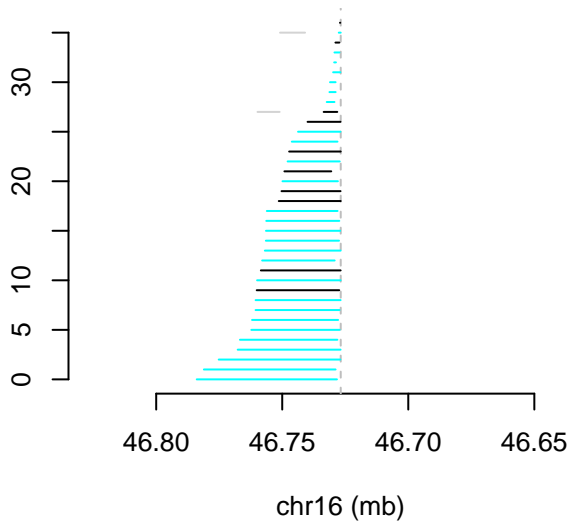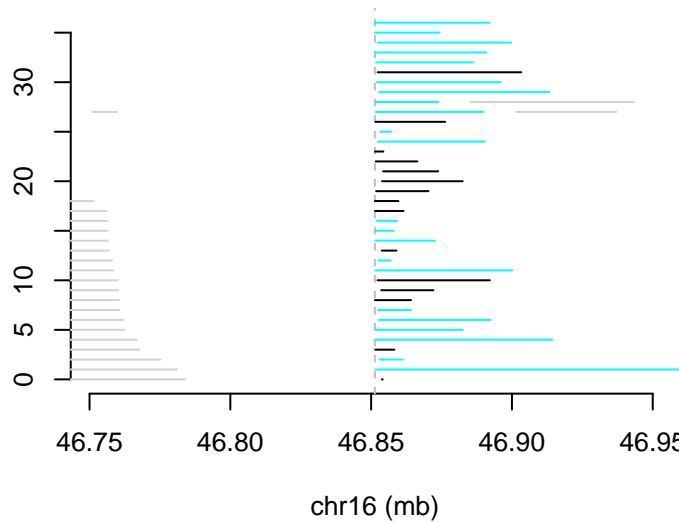

Copy number

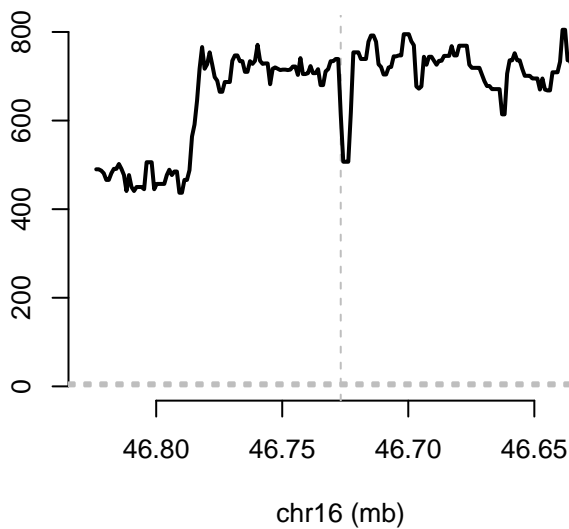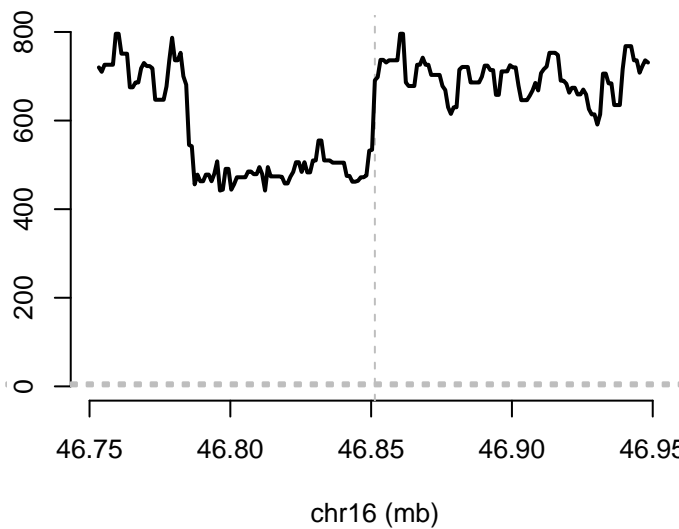

K562 chr16:46,726,792::chr16:46,851,325--

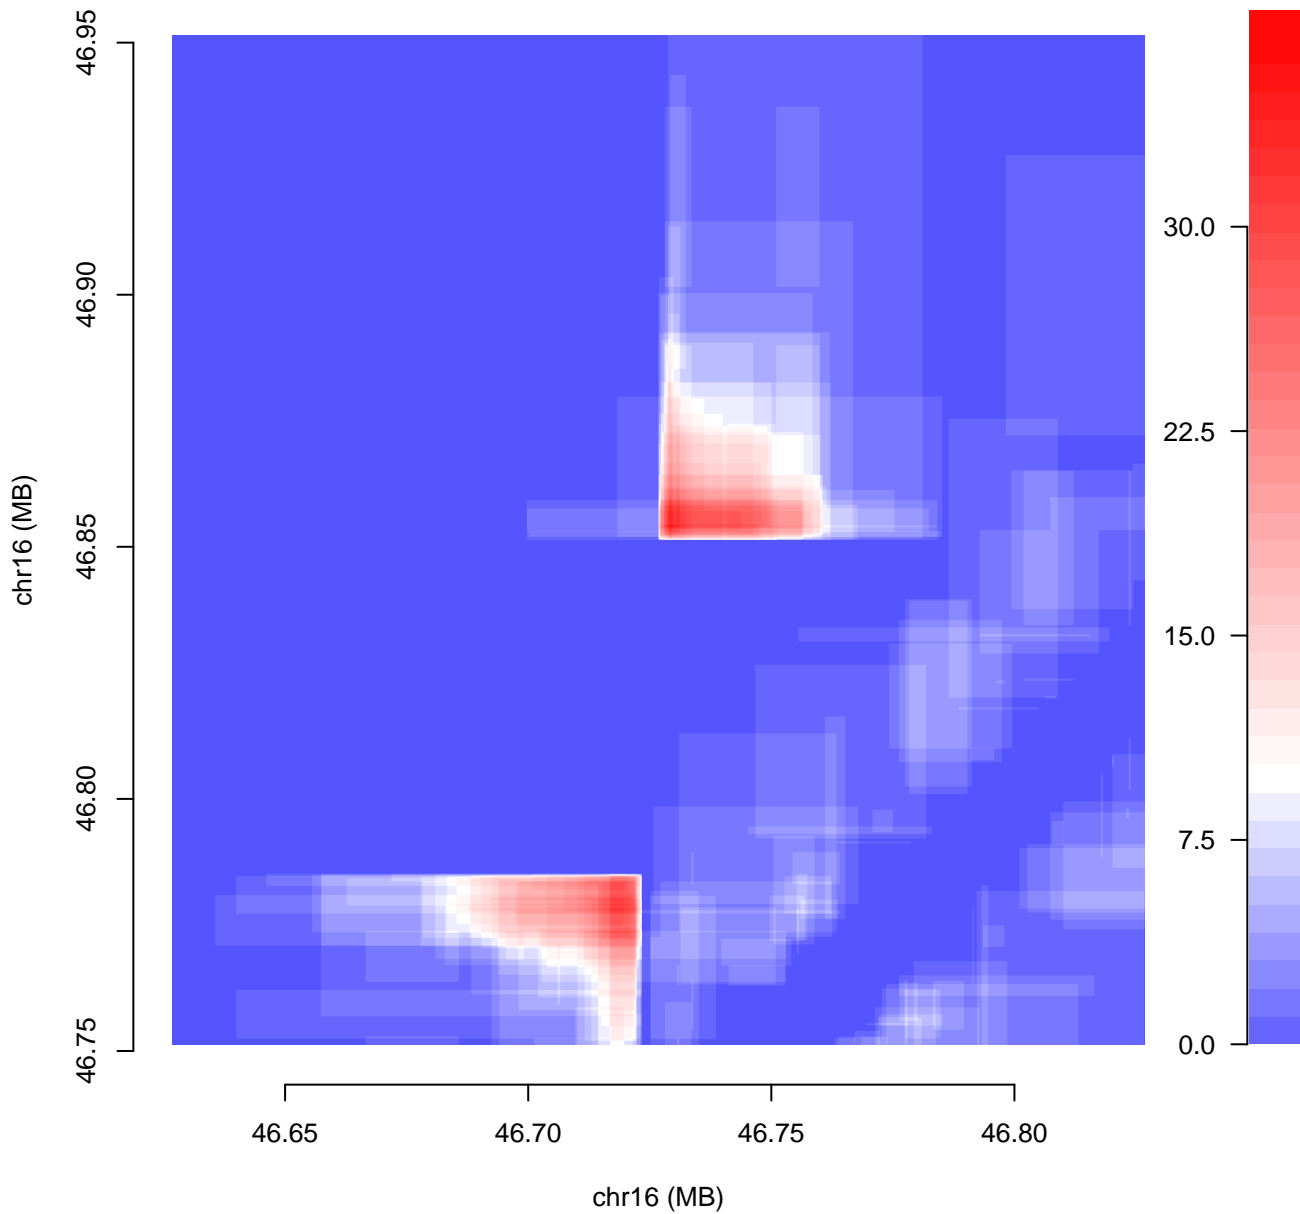

Supplement: Supplemental_Data.zip [file event_367.pdf › event_367.pdf]

Barcode

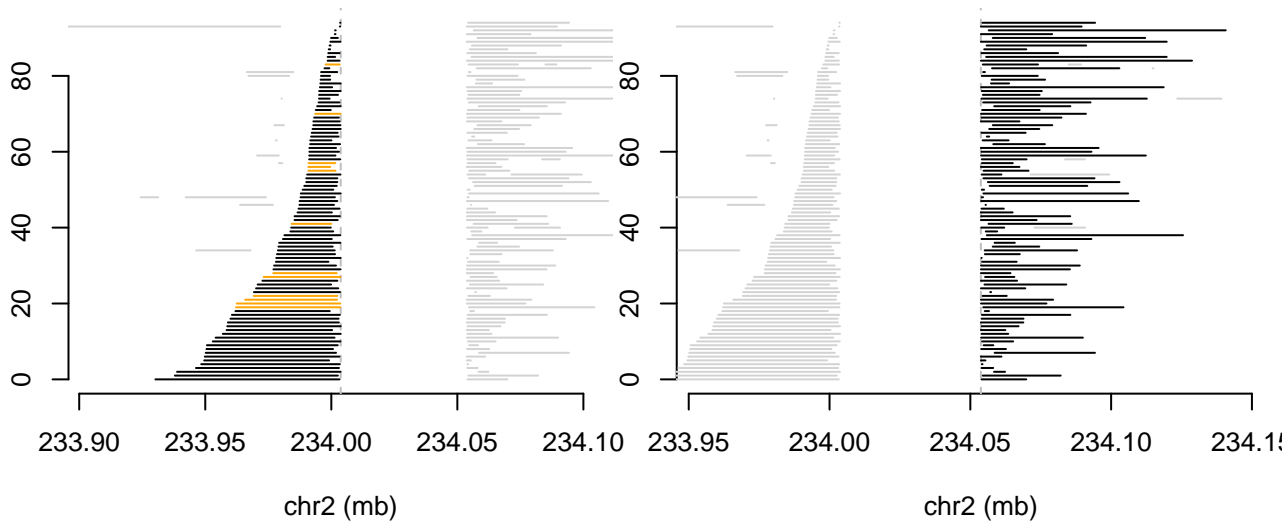

Copy number

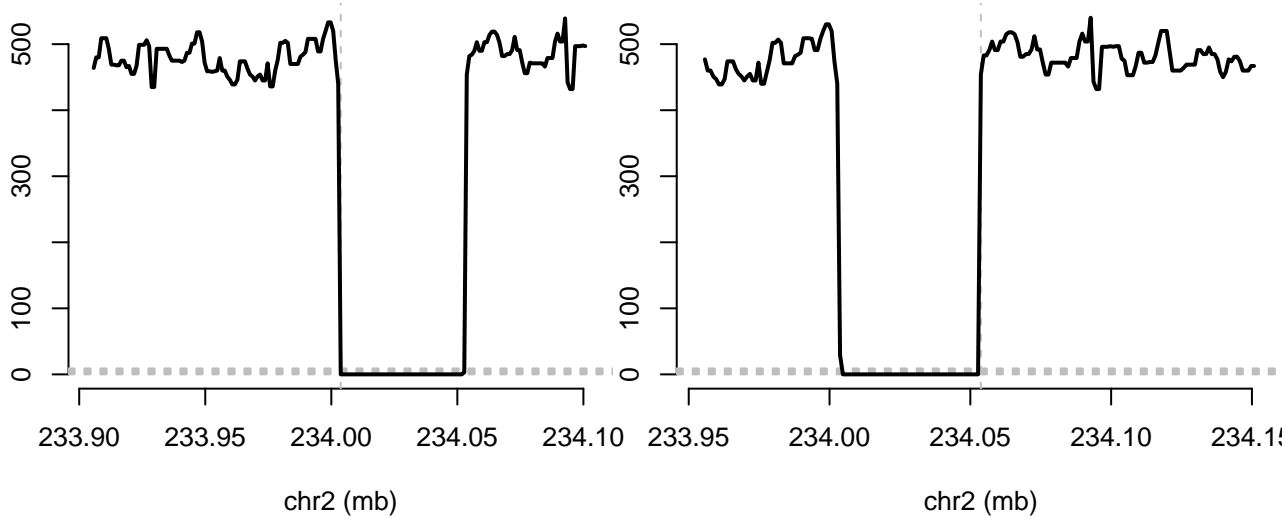

K562 chr2:234,053,739::chr2:234,003,741-+

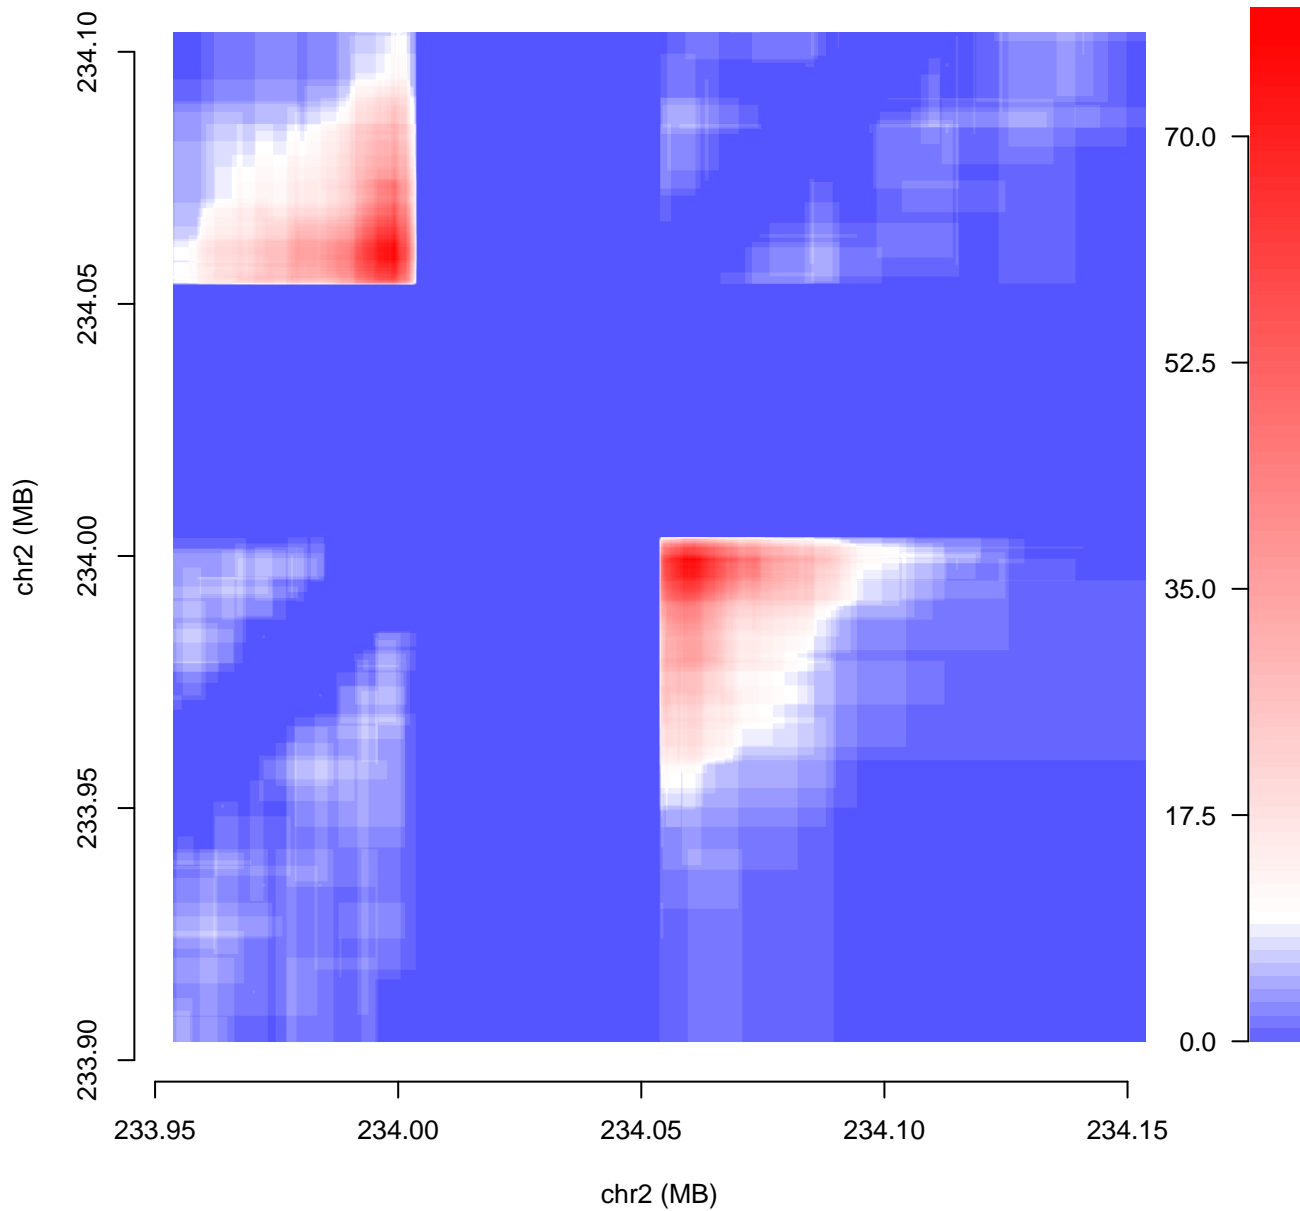

Supplement: Supplemental_Data.zip [file event_368.pdf › event_368.pdf]

Barcode

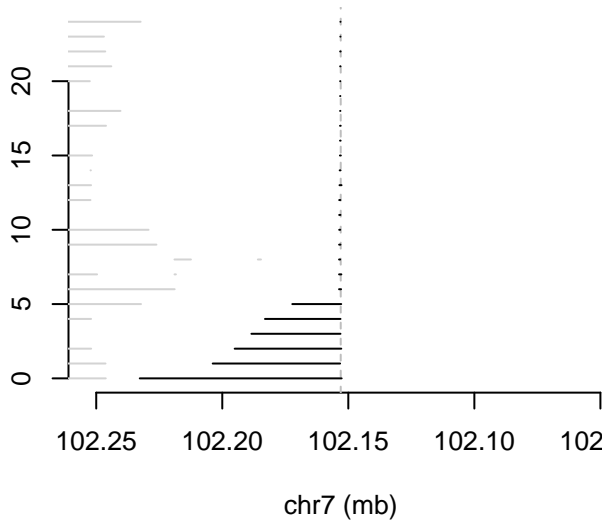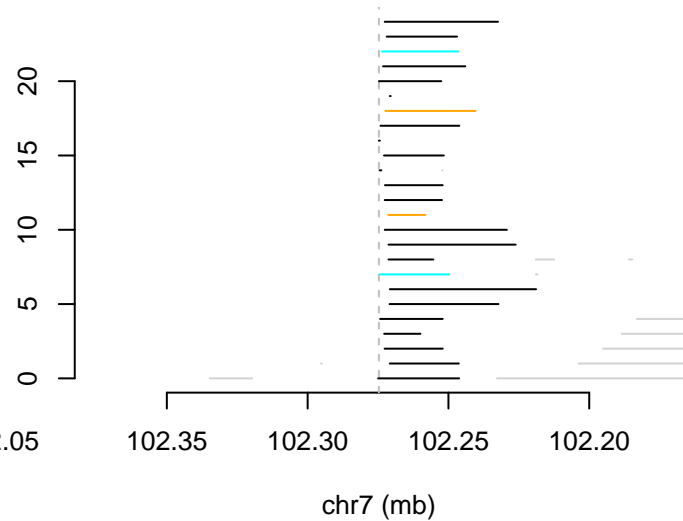

Copy number

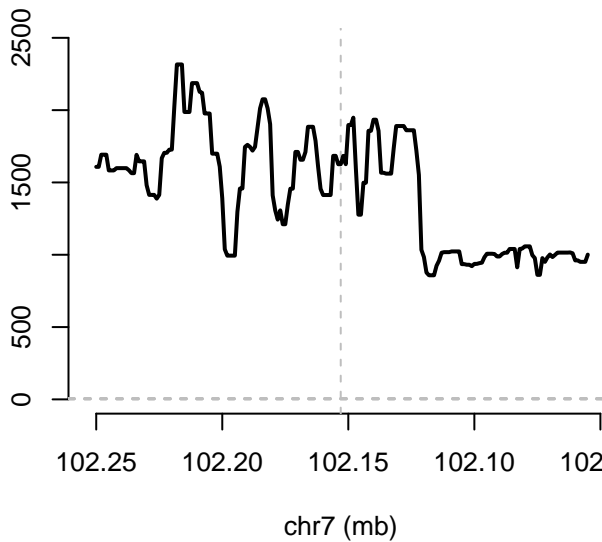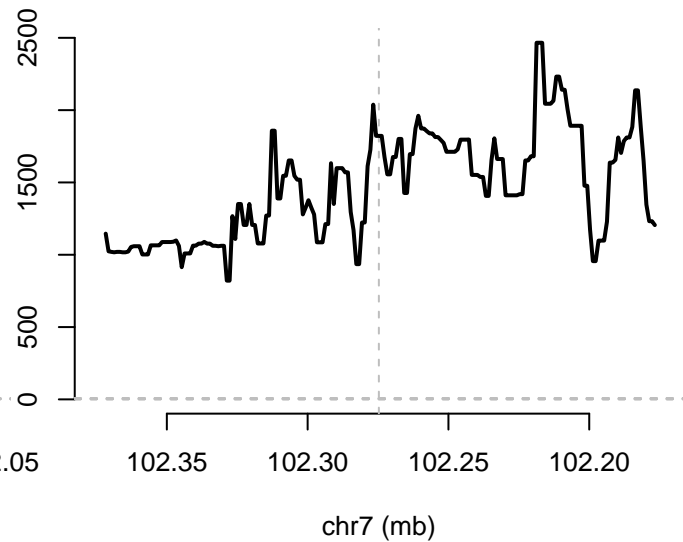

K562 chr7:102,153,004::chr7:102,274,703-+

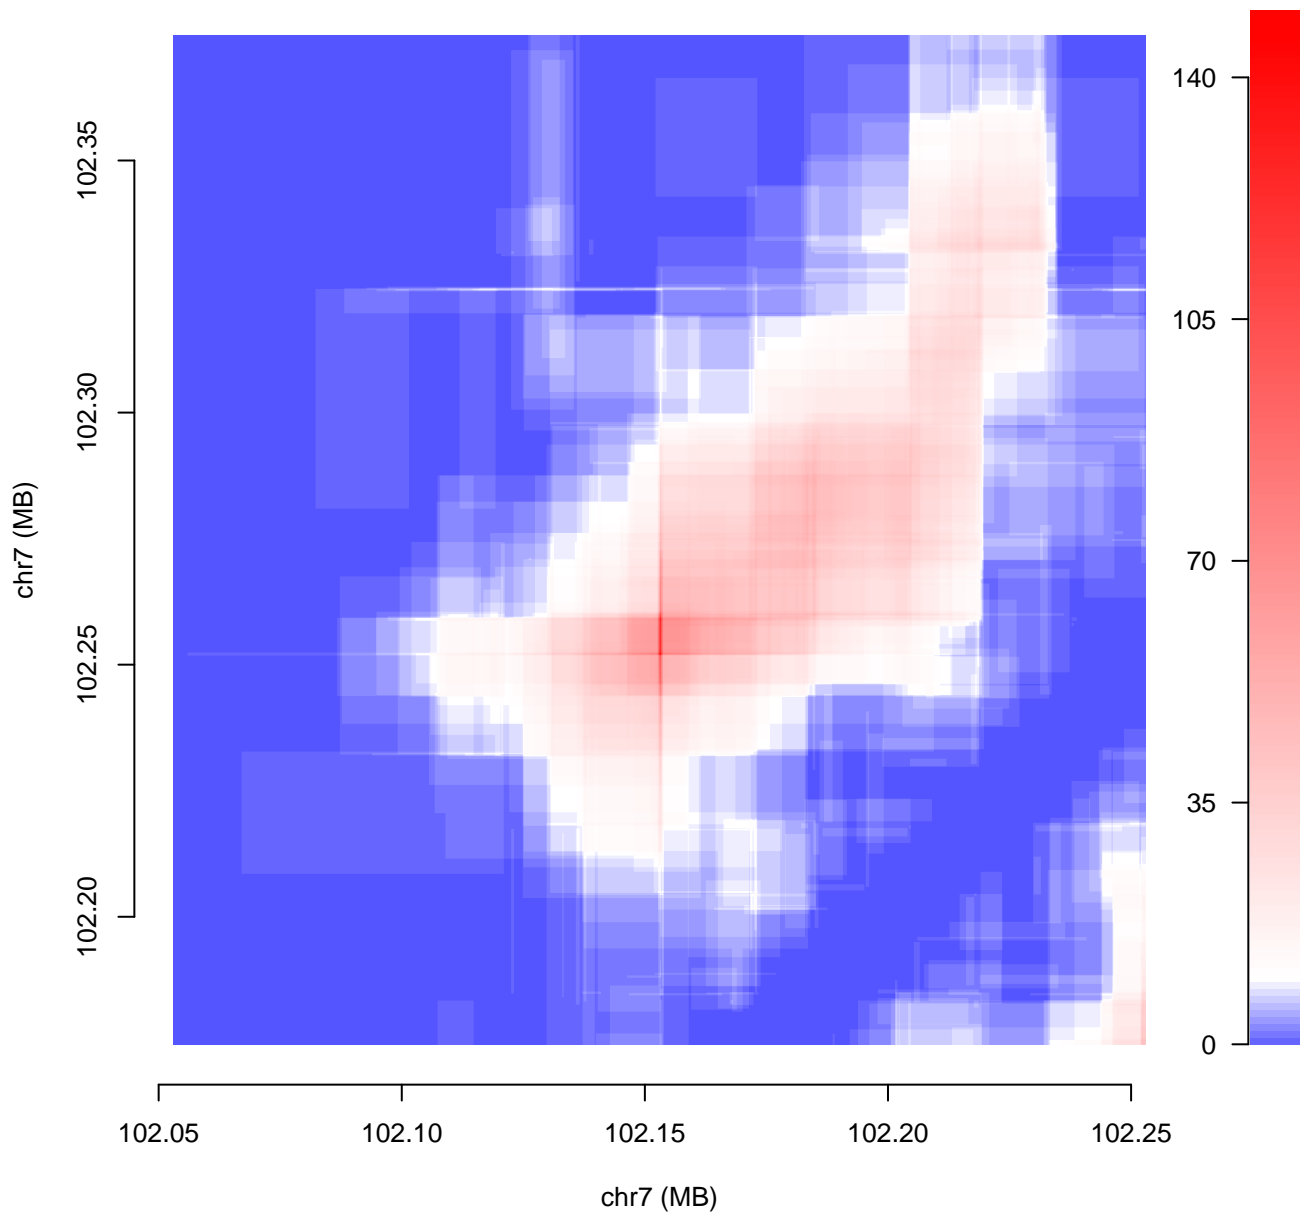

Supplement: Supplemental_Data.zip [file event_369.pdf › event_369.pdf]
