# Supplementary figures and images for: Comprehensive, integrated, and phased whole-genome analysis of the primary ENCODE cell line K562 (part 4 of 6)
Source: HighWire-hosted journal article supplement (doi:10.1101/gr.234948.118), 2019-02-08

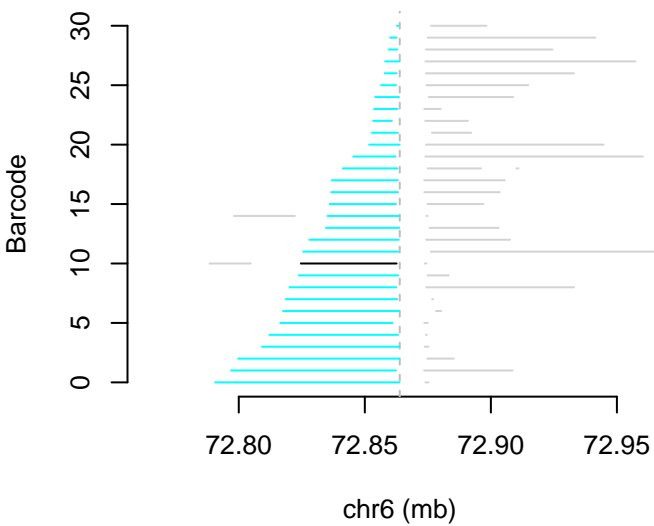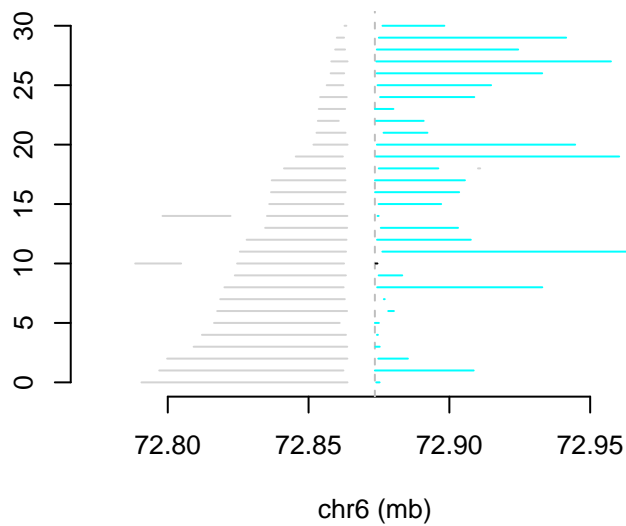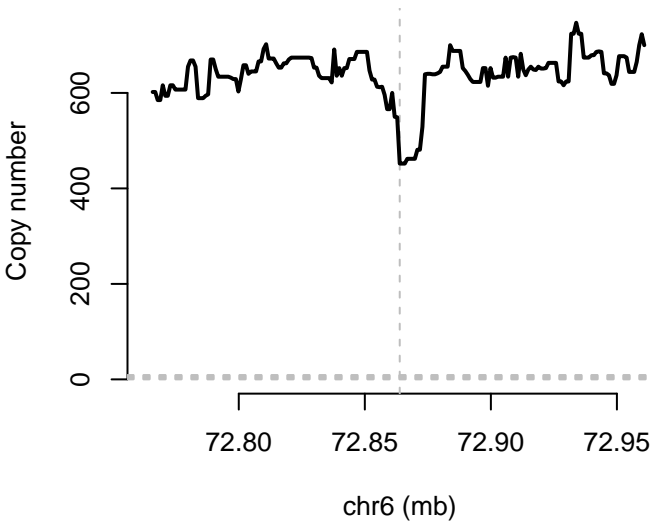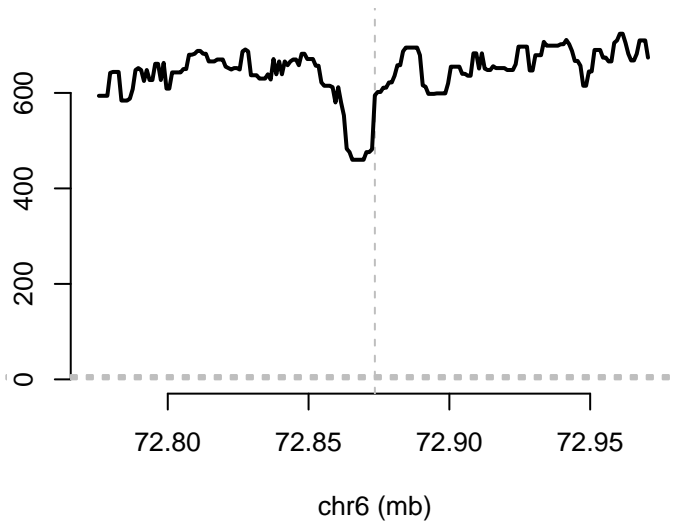

K562 chr6:72,873,540::chr6:72,863,851-+

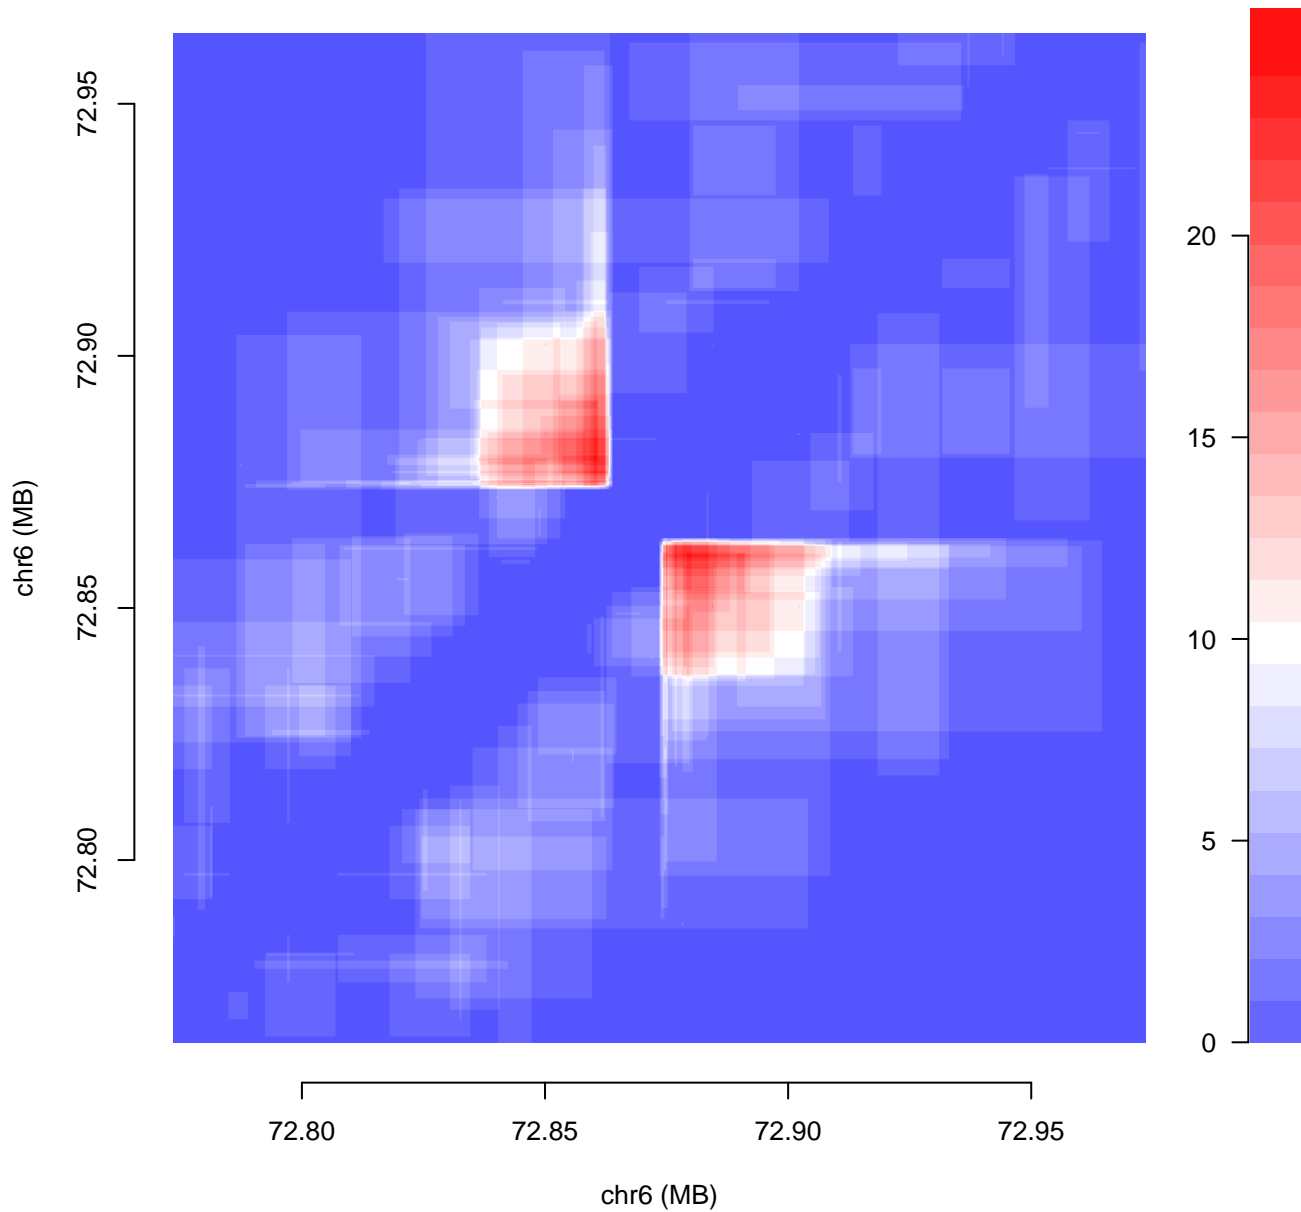

Supplement: Supplemental_Data.zip [file event_37.pdf › event_37.pdf]

Barcode

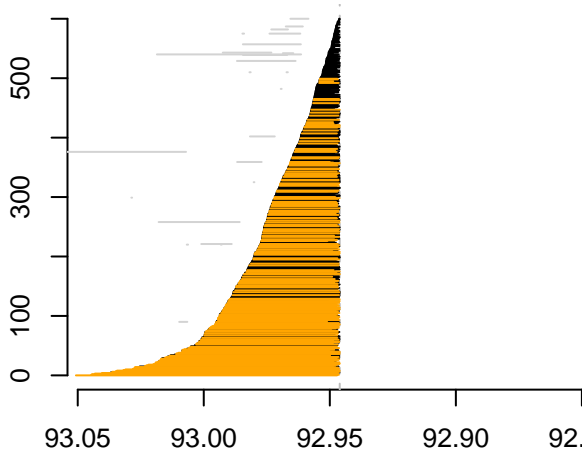

chr13 (mb)

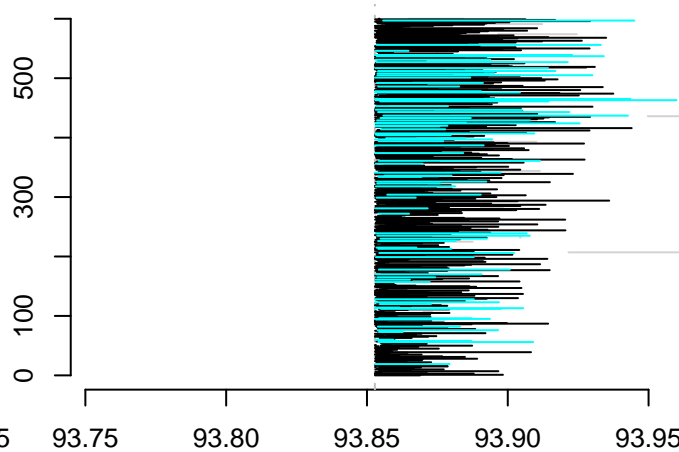

chr13 (mb)

Copy number

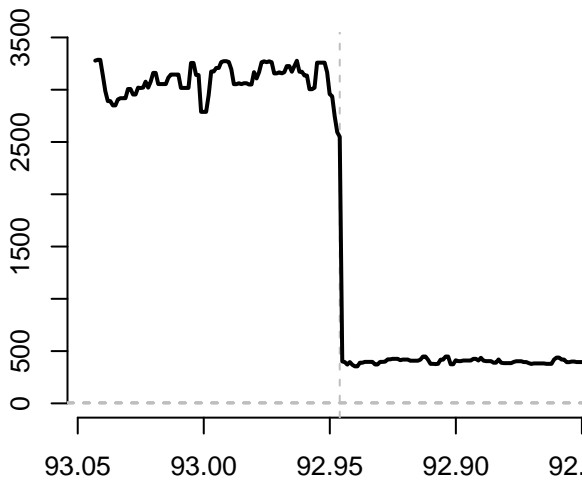

chr13 (mb)

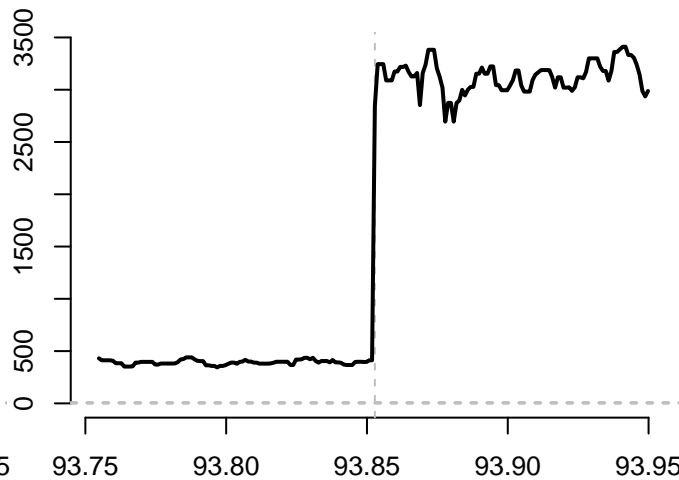

chr13 (mb)

K562 chr13:92,946,061::chr13:93,852,808--

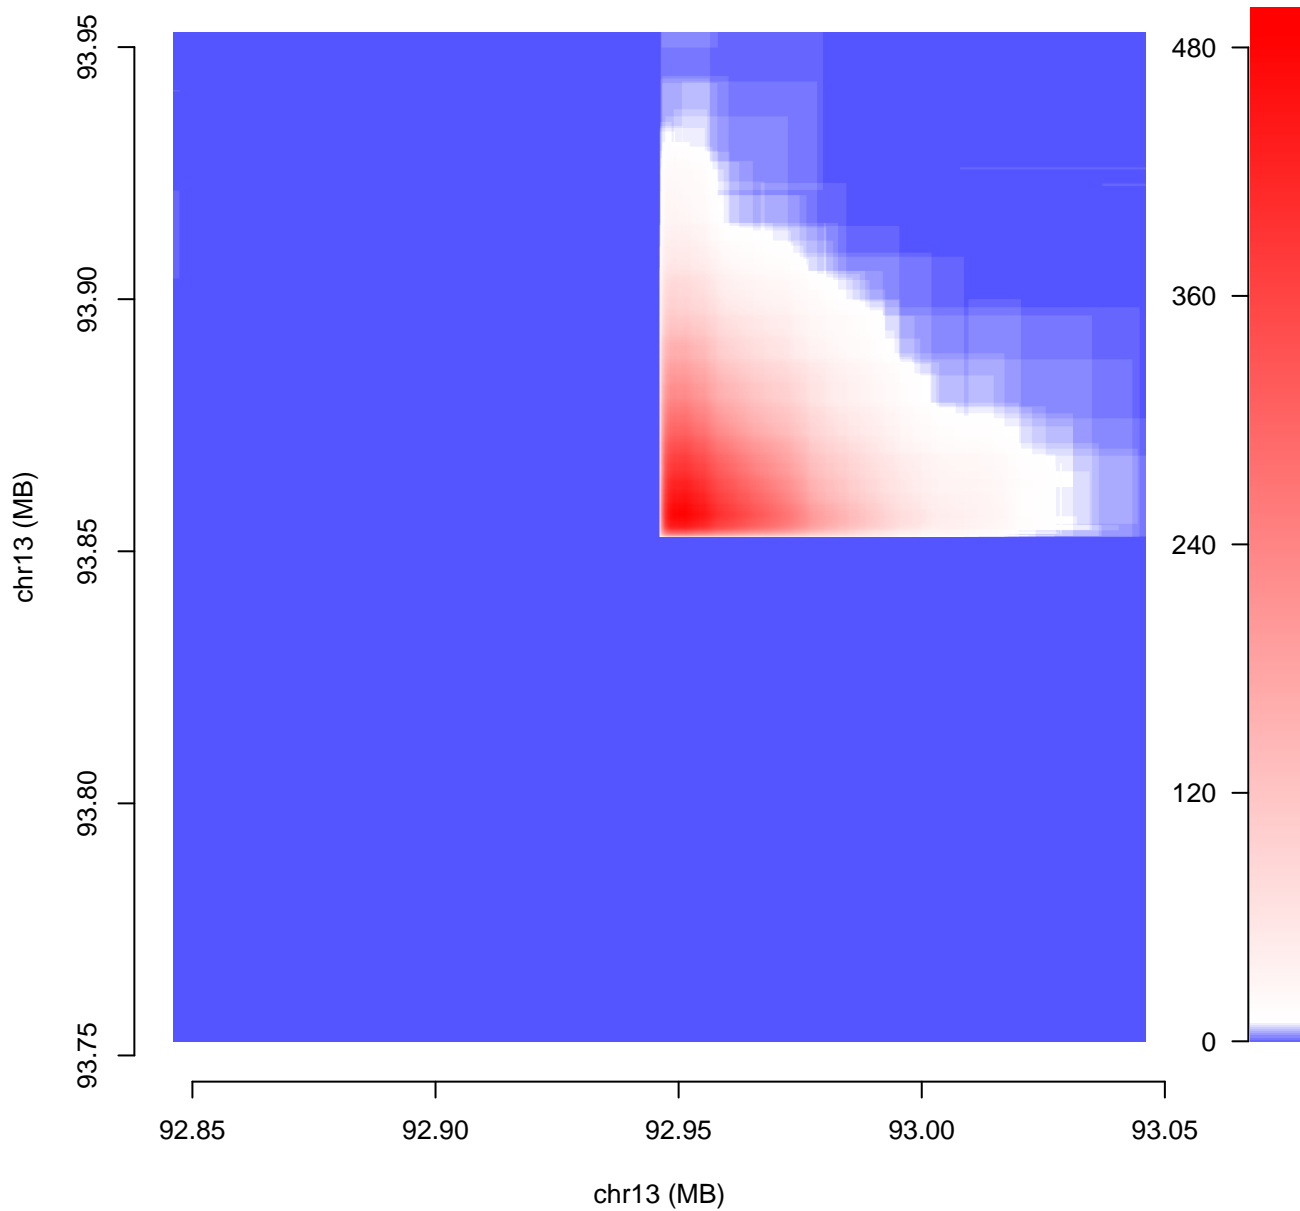

Supplement: Supplemental_Data.zip [file event_370.pdf › event_370.pdf]

Barcode

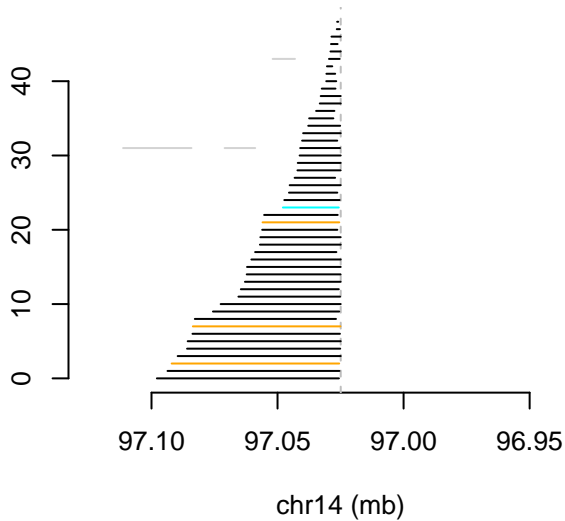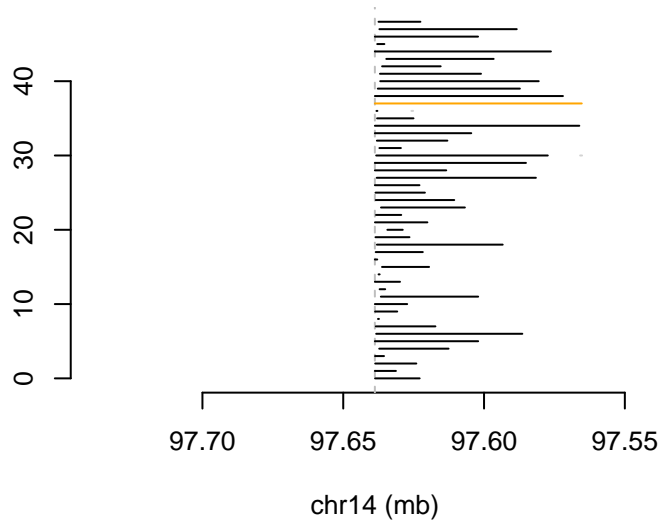

Copy number

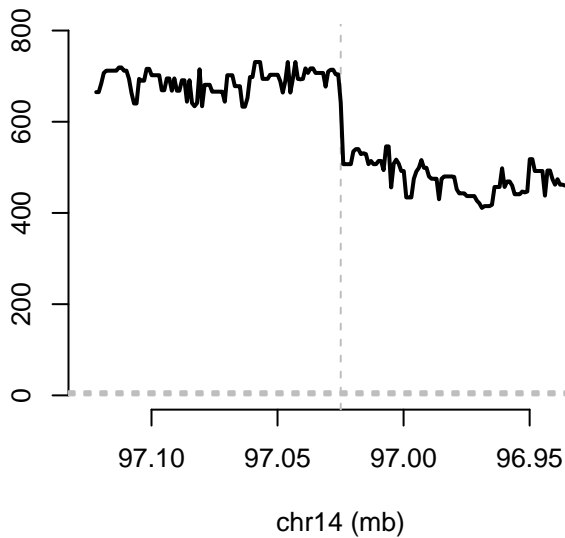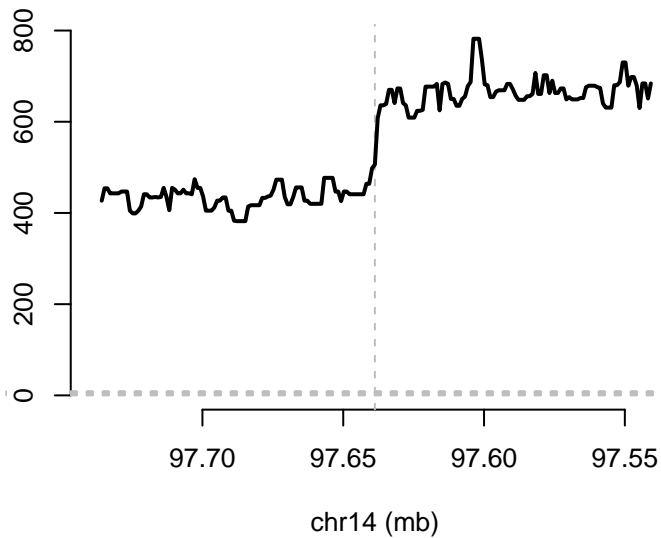

K562 chr14:97,638,766::chr14:97,024,928+-

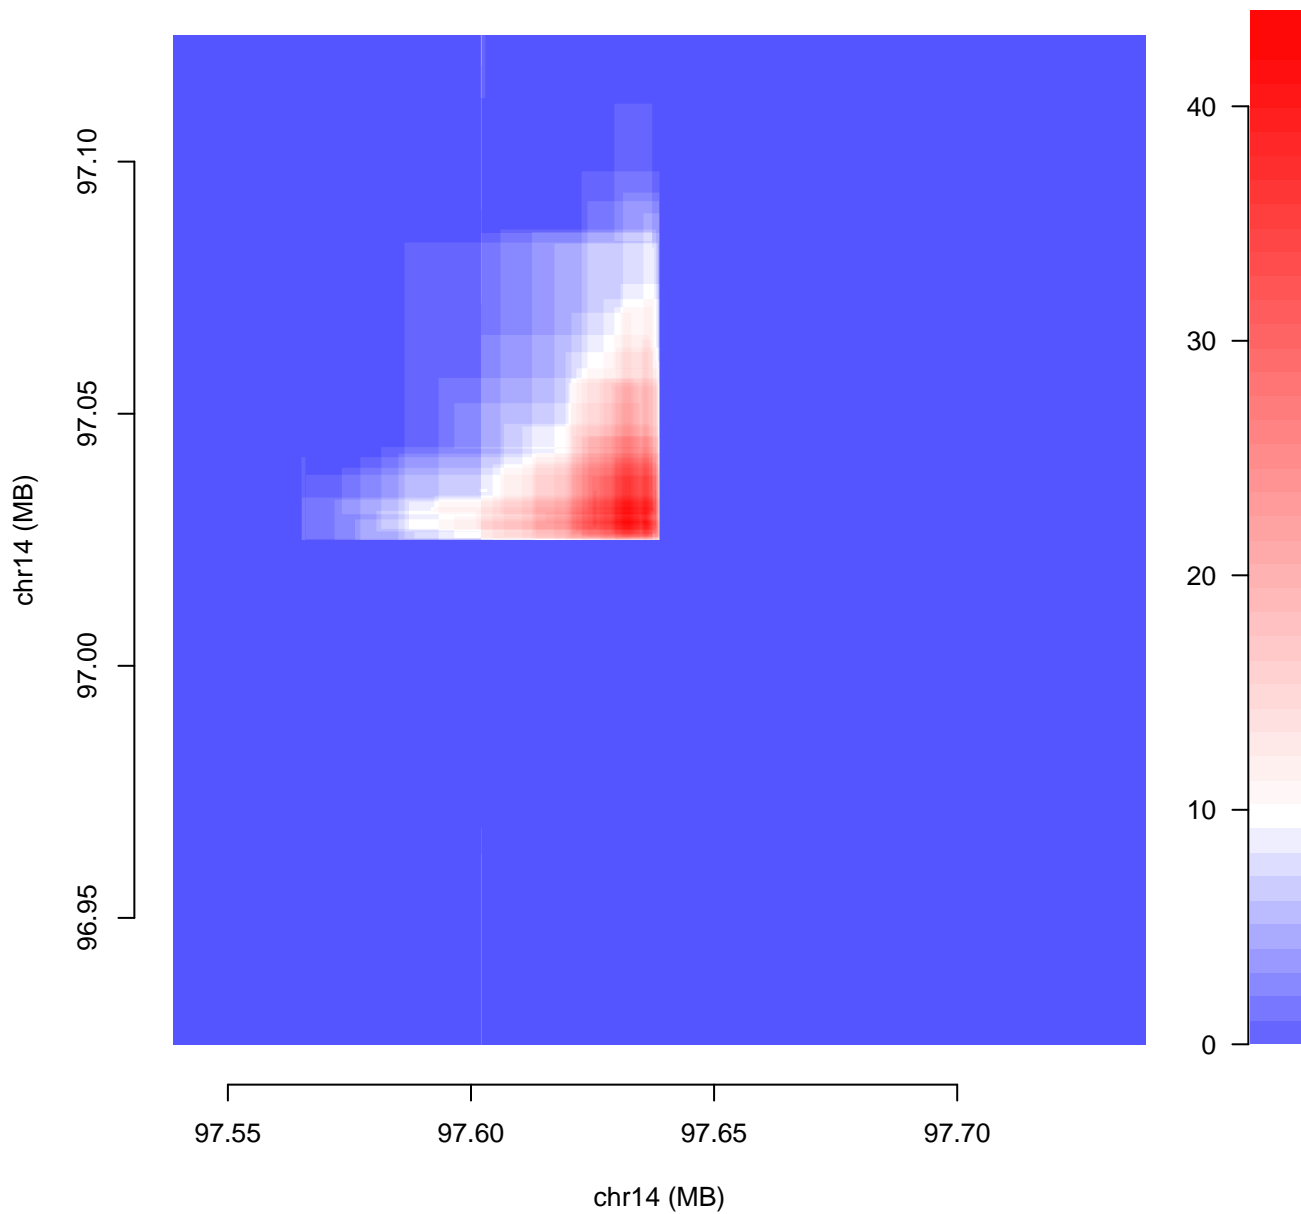

Supplement: Supplemental_Data.zip [file event_371.pdf › event_371.pdf]

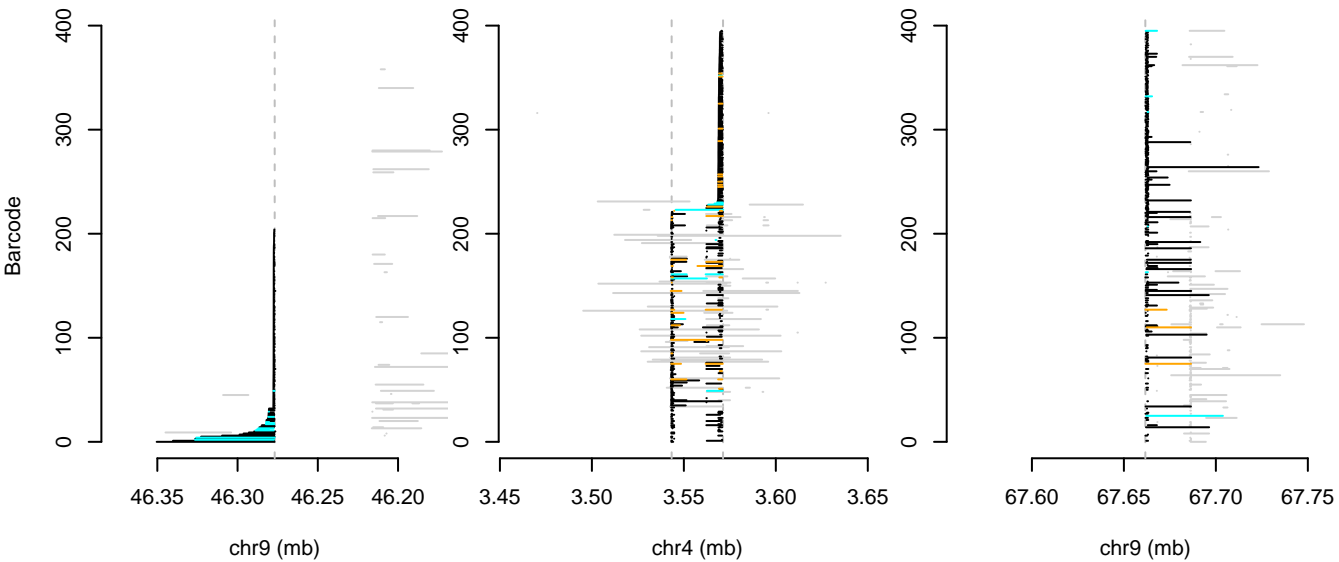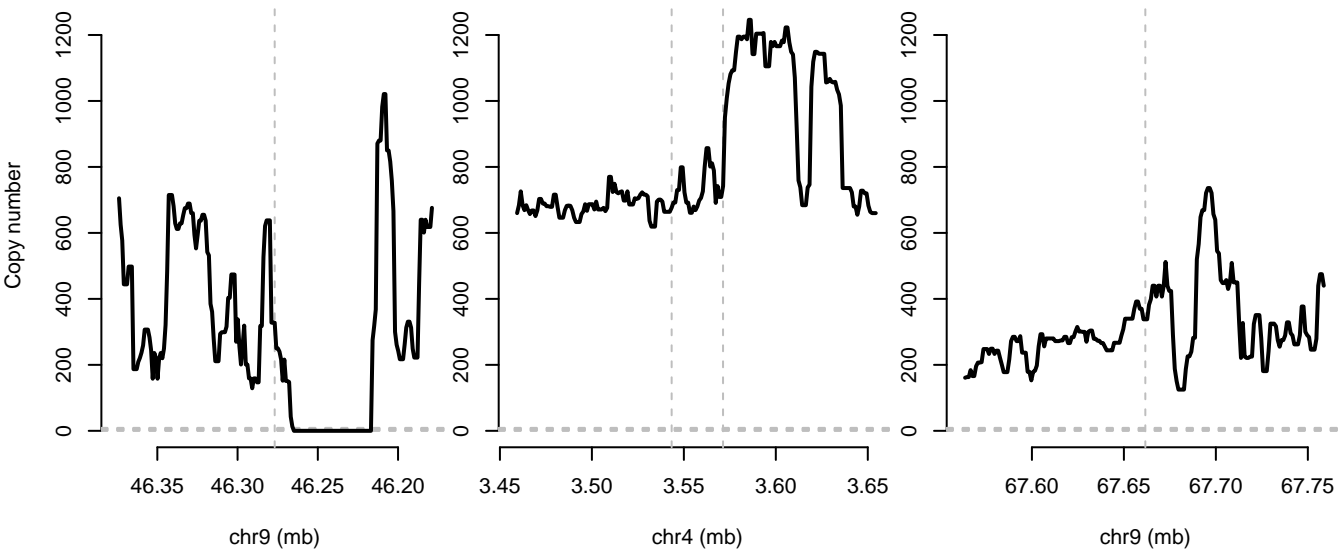

K562 chr9:46,276,869::chr4:3,543,369--

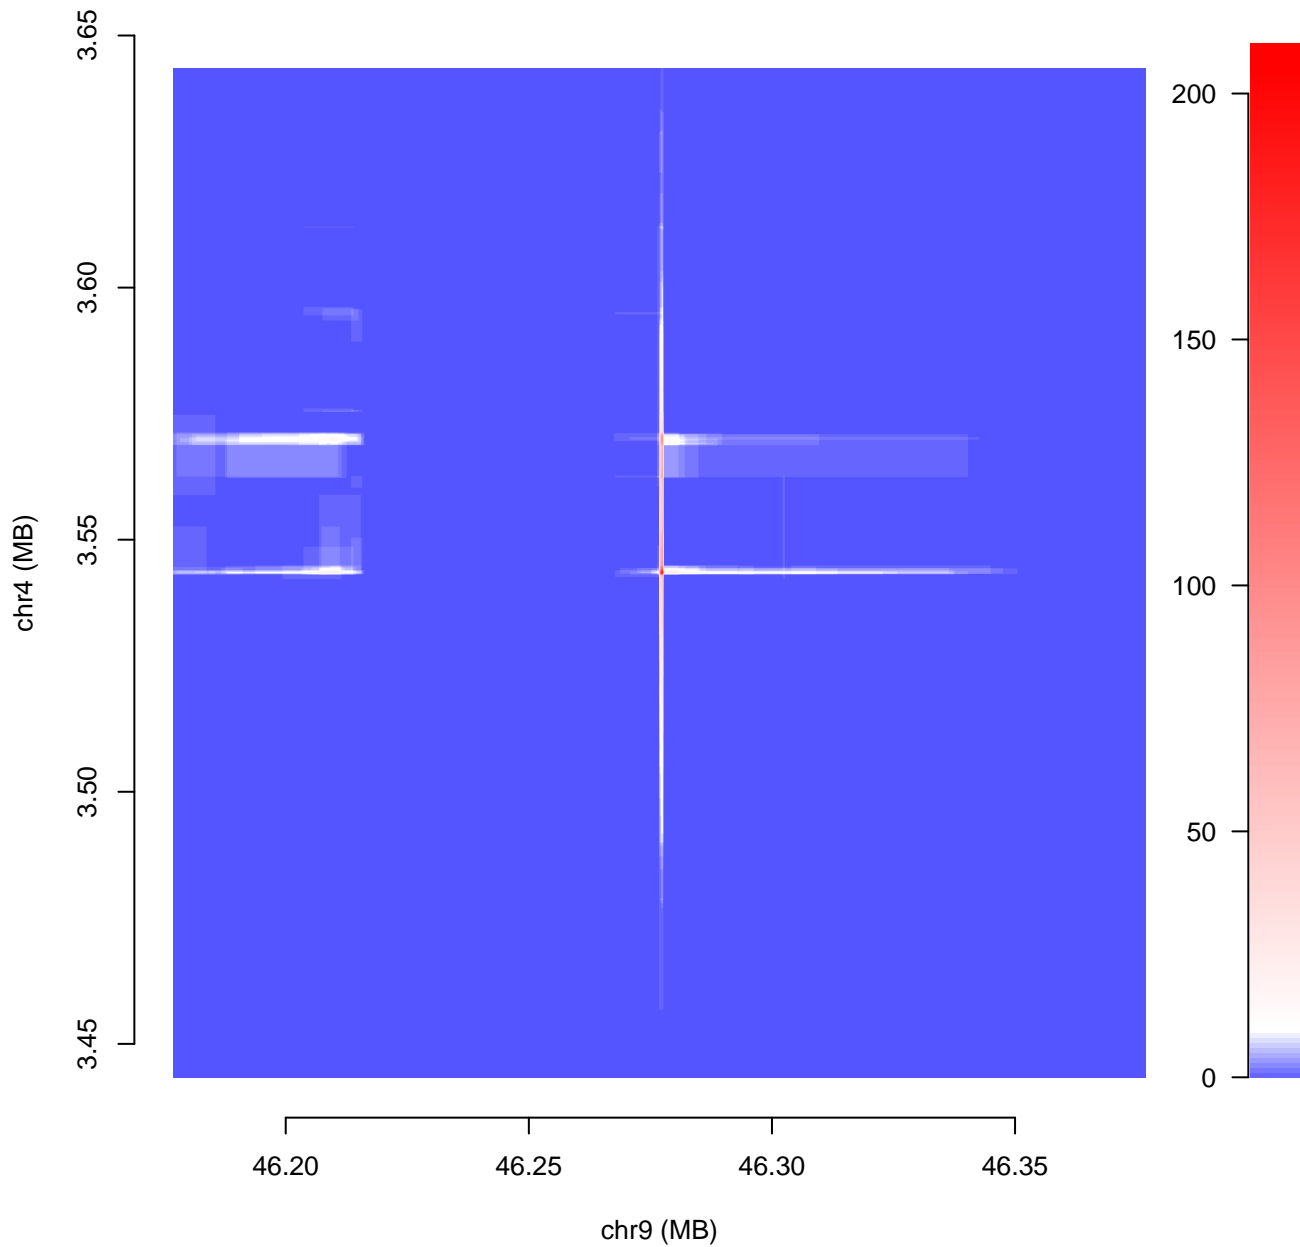

K562 chr4:3,543,369::chr4:3,571,299--+

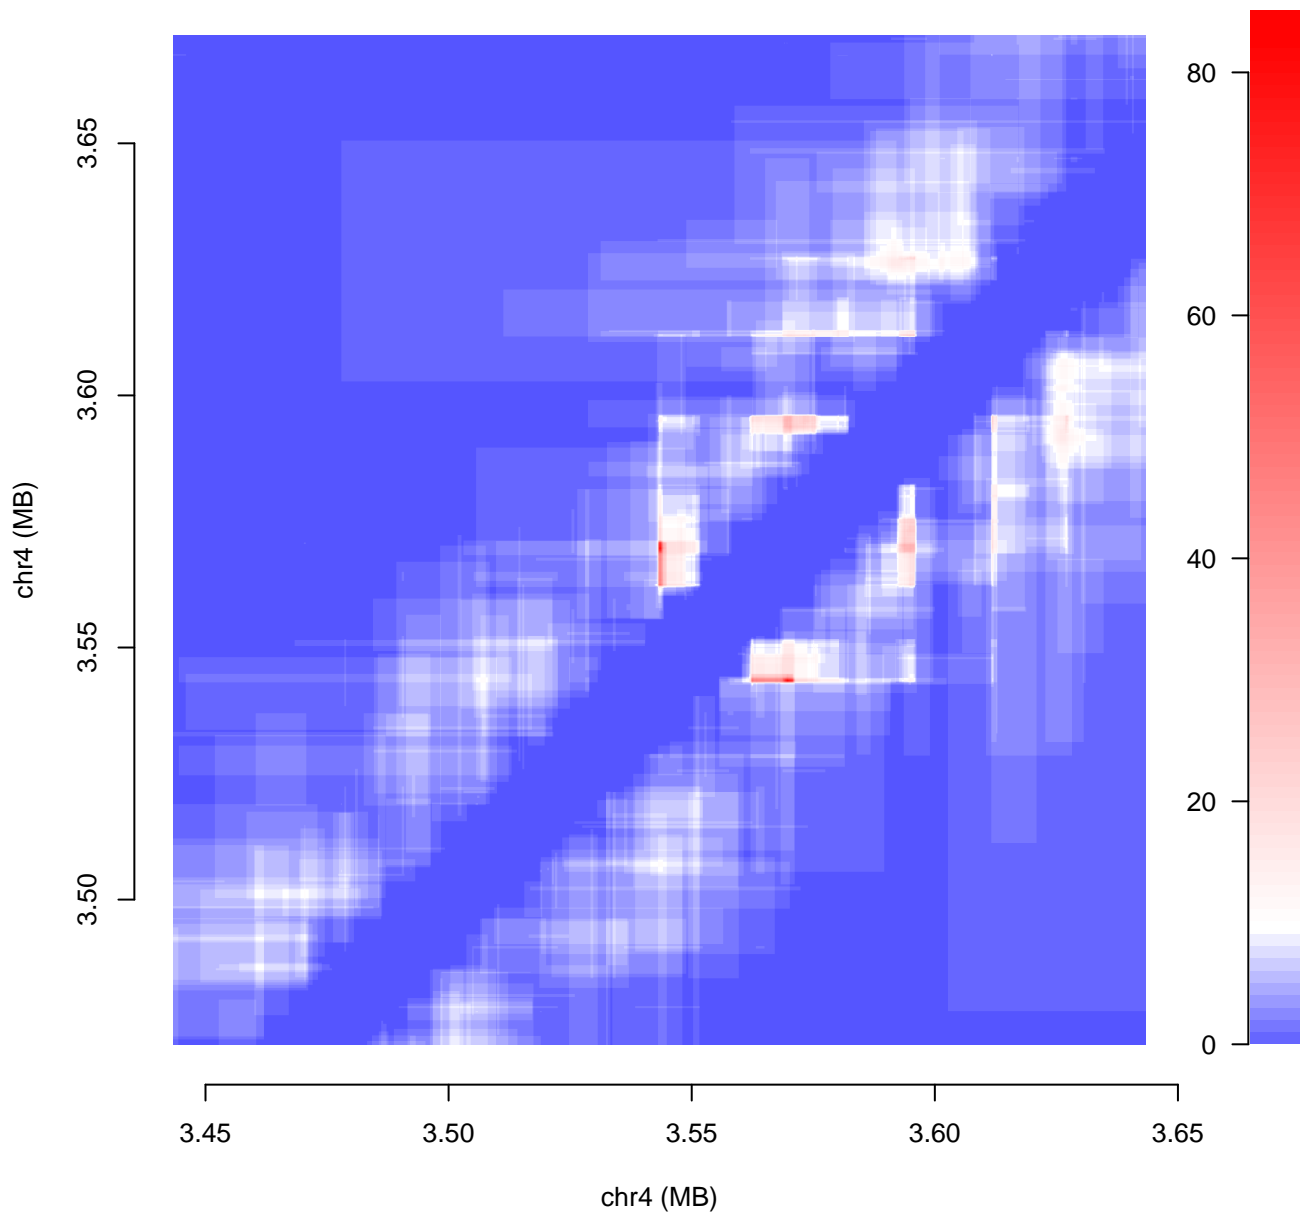

K562 chr9:67,661,658::chr4:3,571,299-+

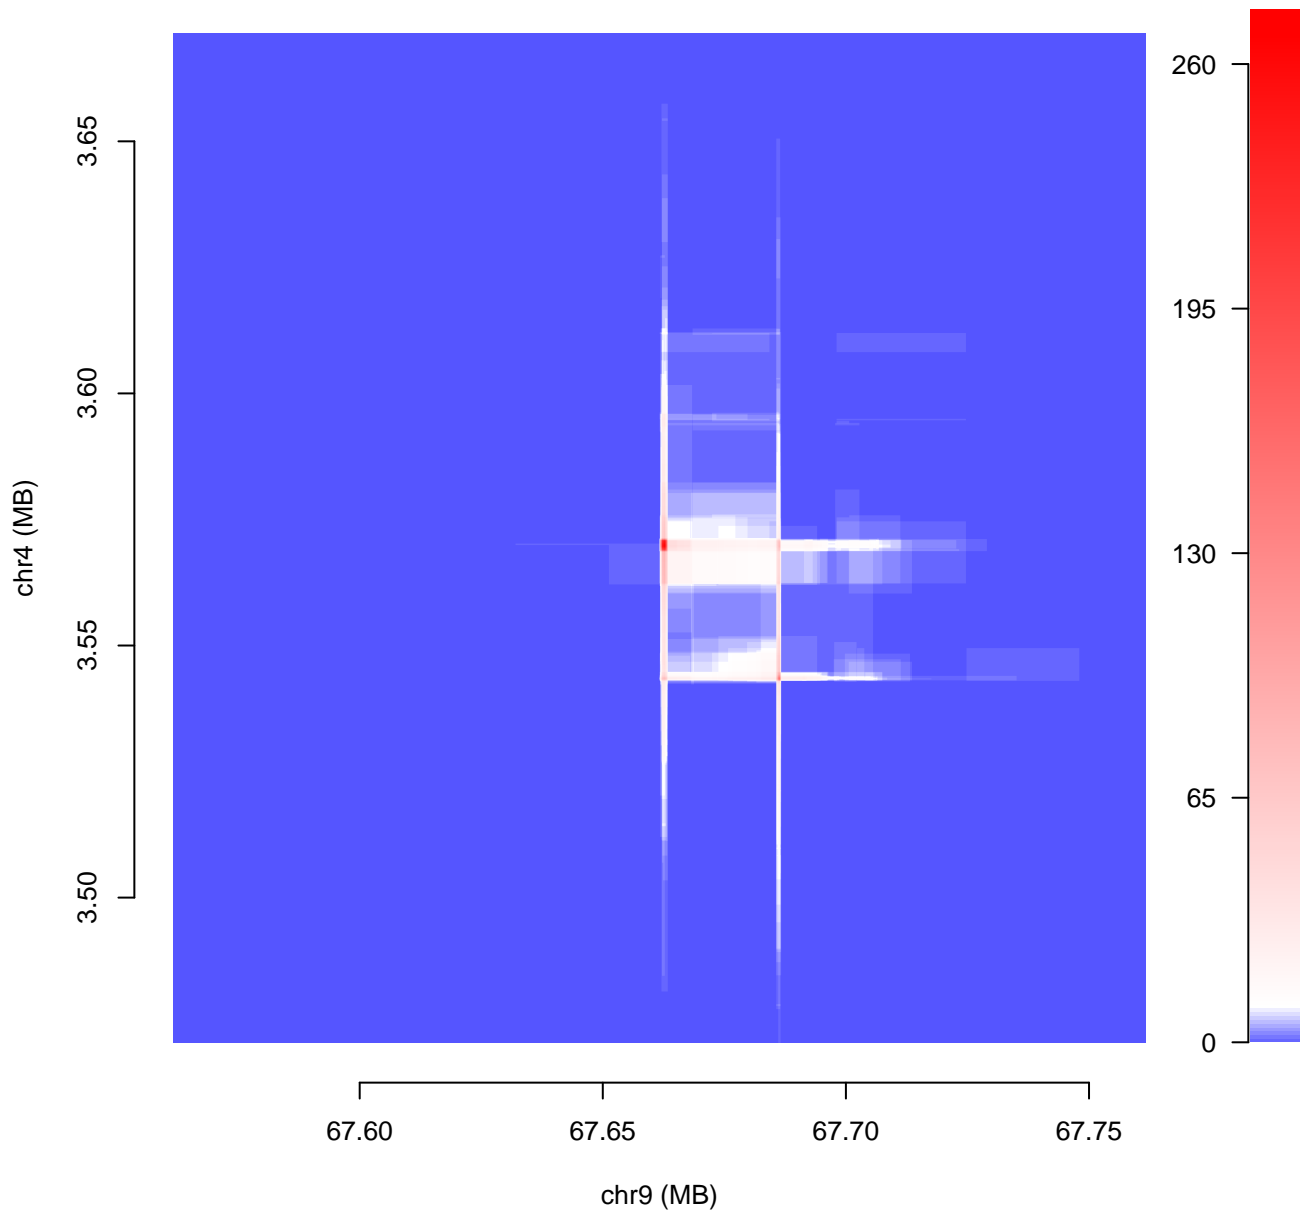

Supplement: Supplemental_Data.zip [file event_372.pdf › event_372.pdf]

Barcode

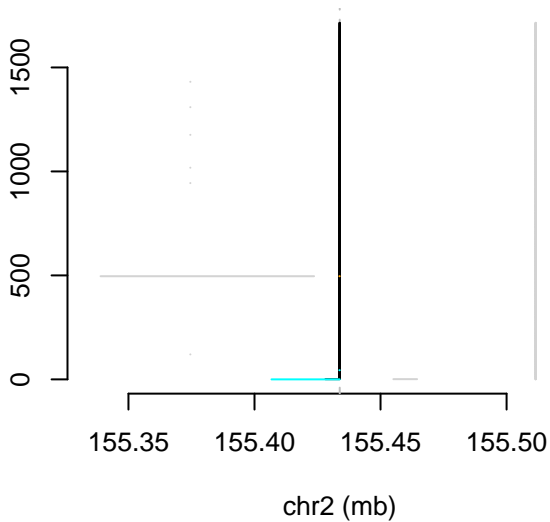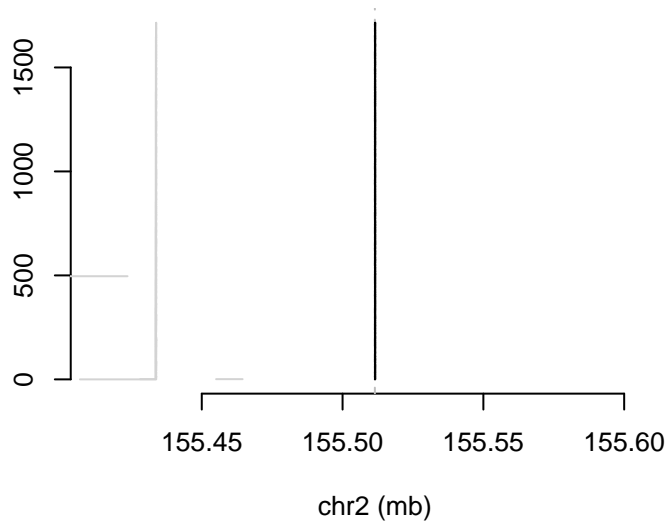

Copy number

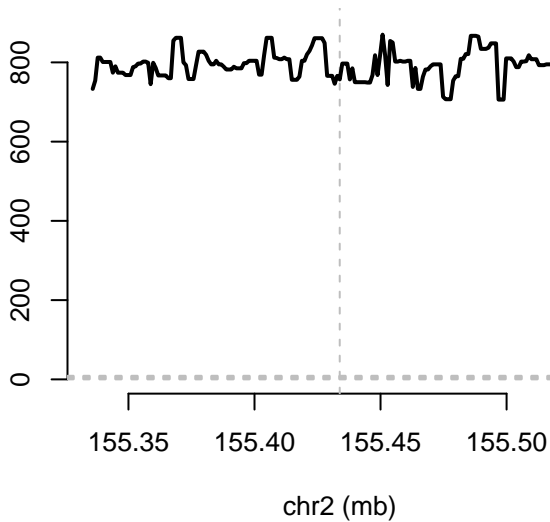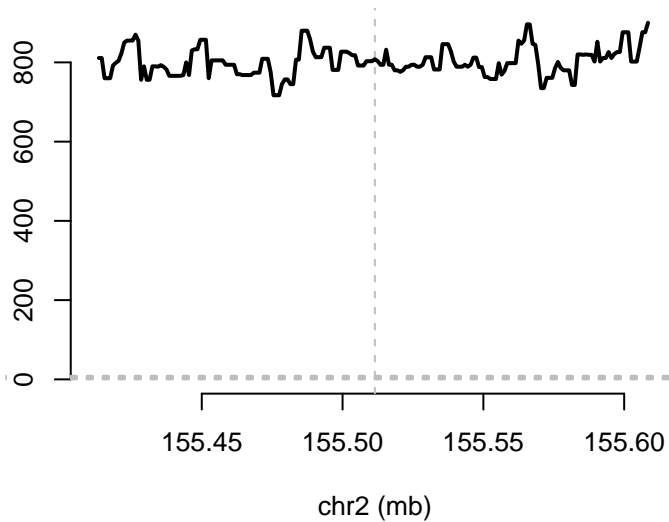

K562 chr2:155,511,467::chr2:155,433,816-+

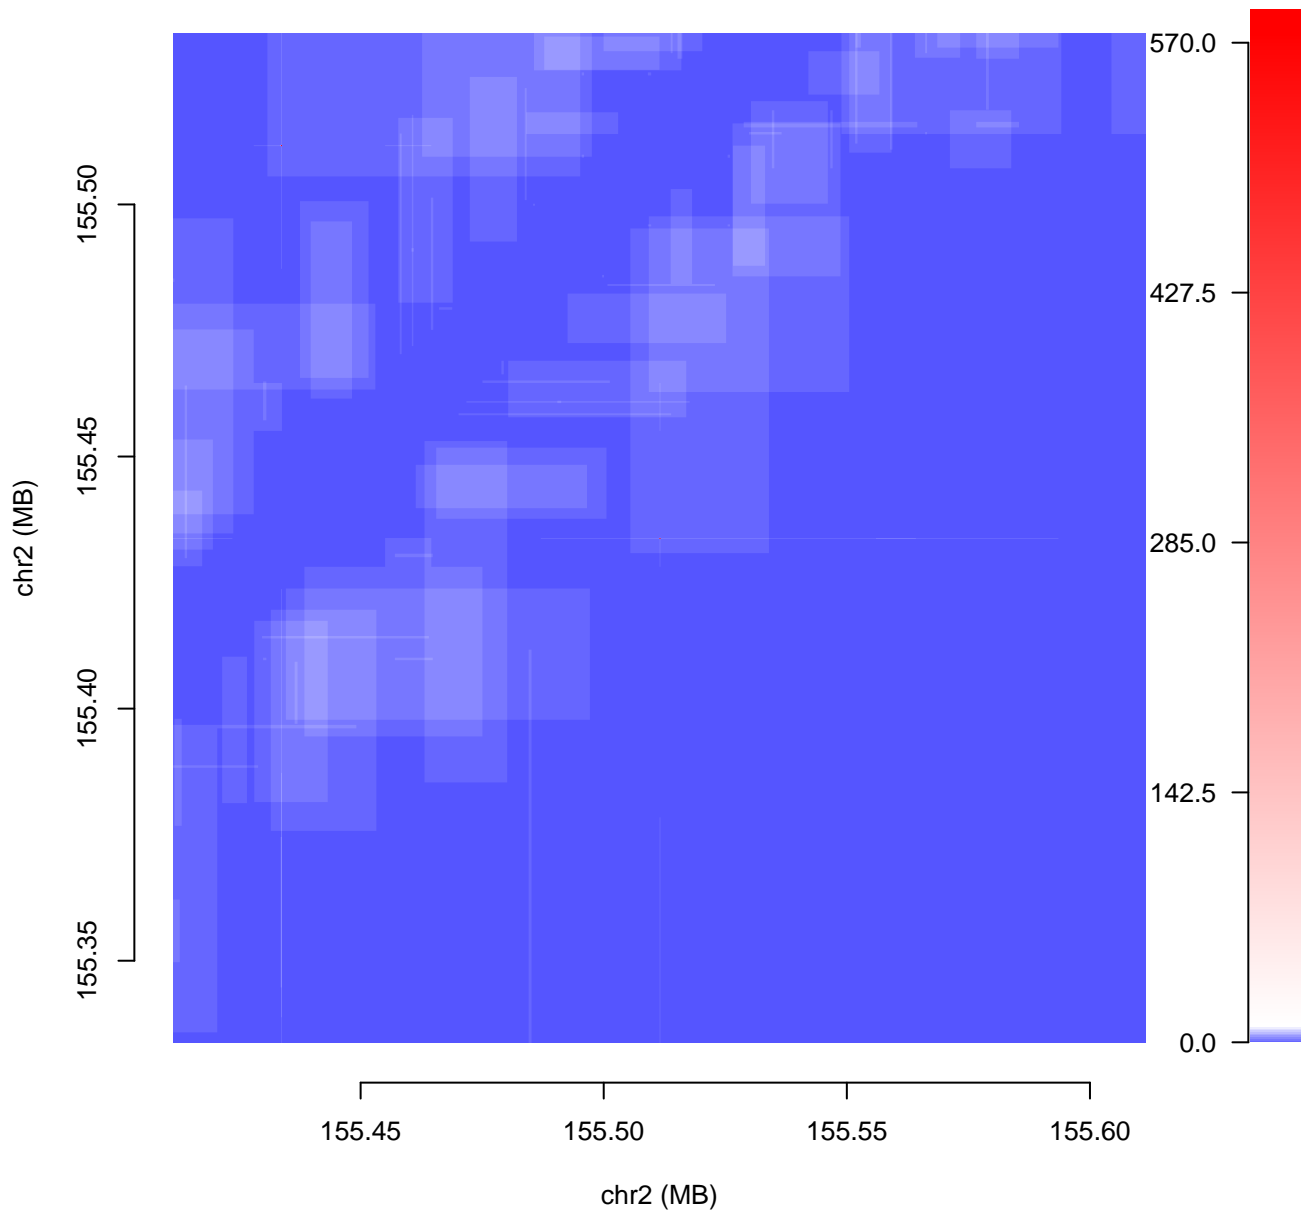

Supplement: Supplemental_Data.zip [file event_373.pdf › event_373.pdf]

Barcode

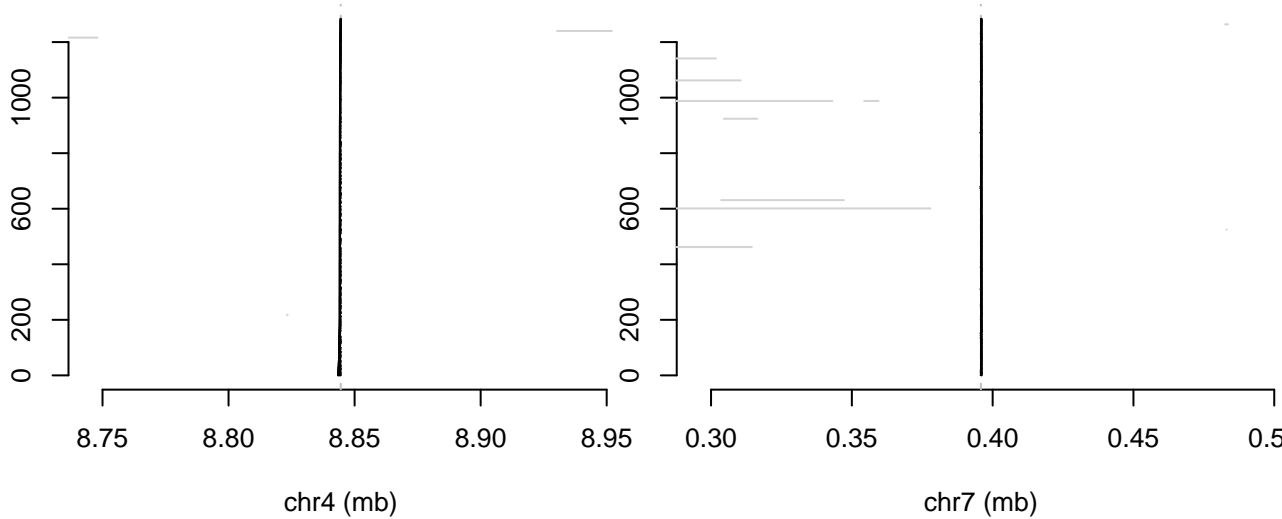

Copy number

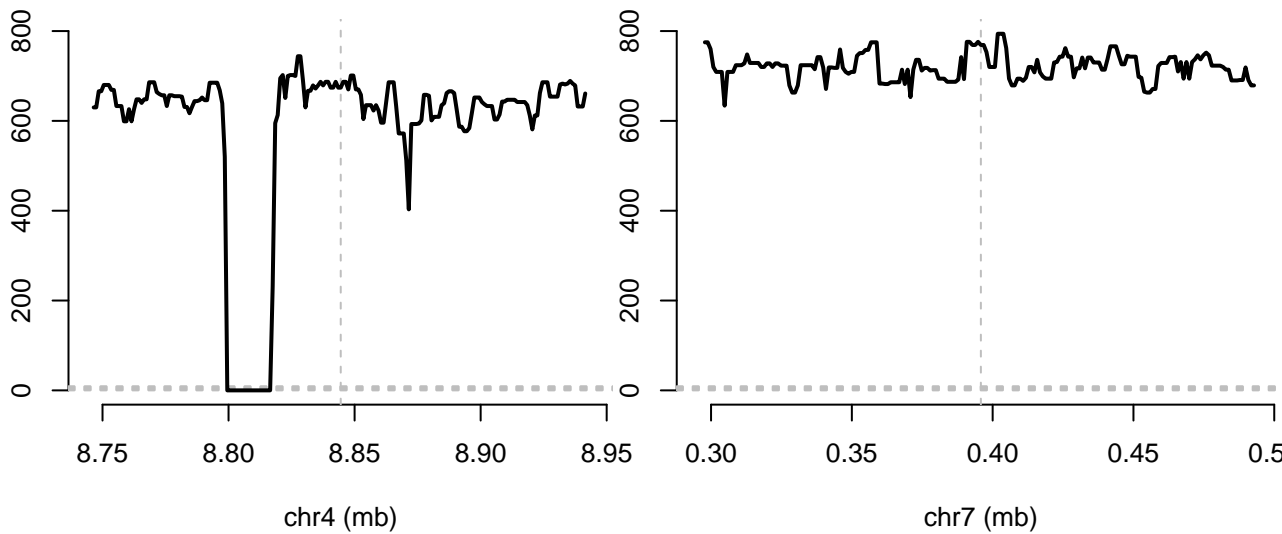

K562 chr4:8,844,502::chr7:395,816+-

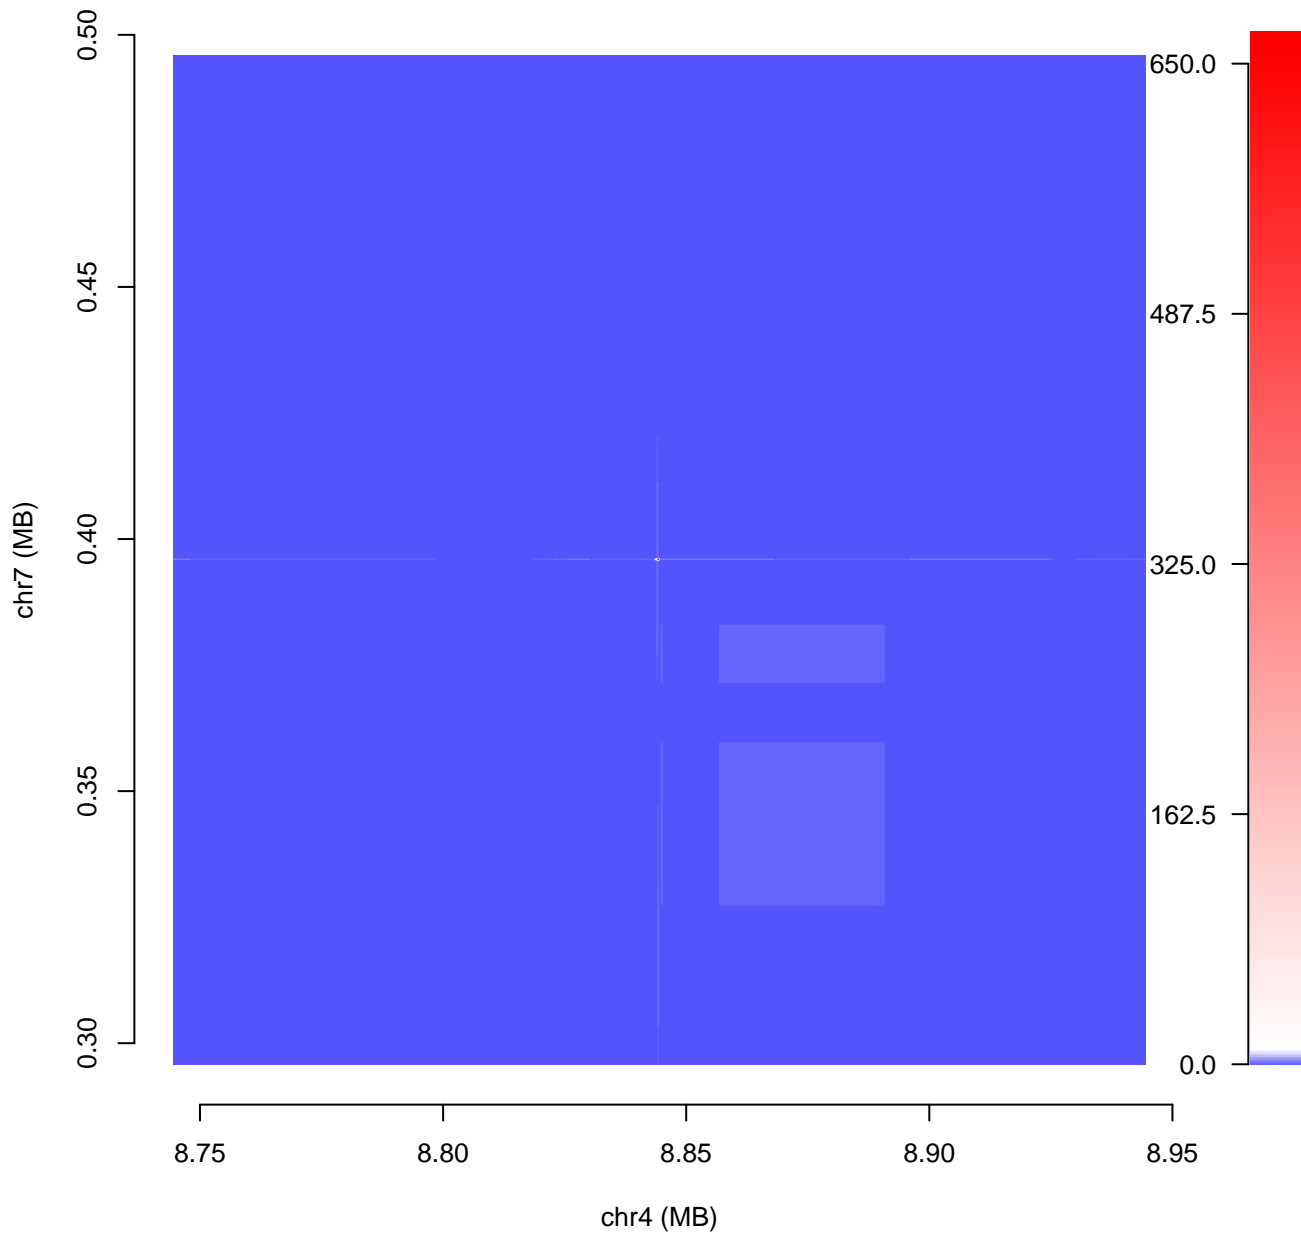

Supplement: Supplemental_Data.zip [file event_374.pdf › event_374.pdf]

Barcode

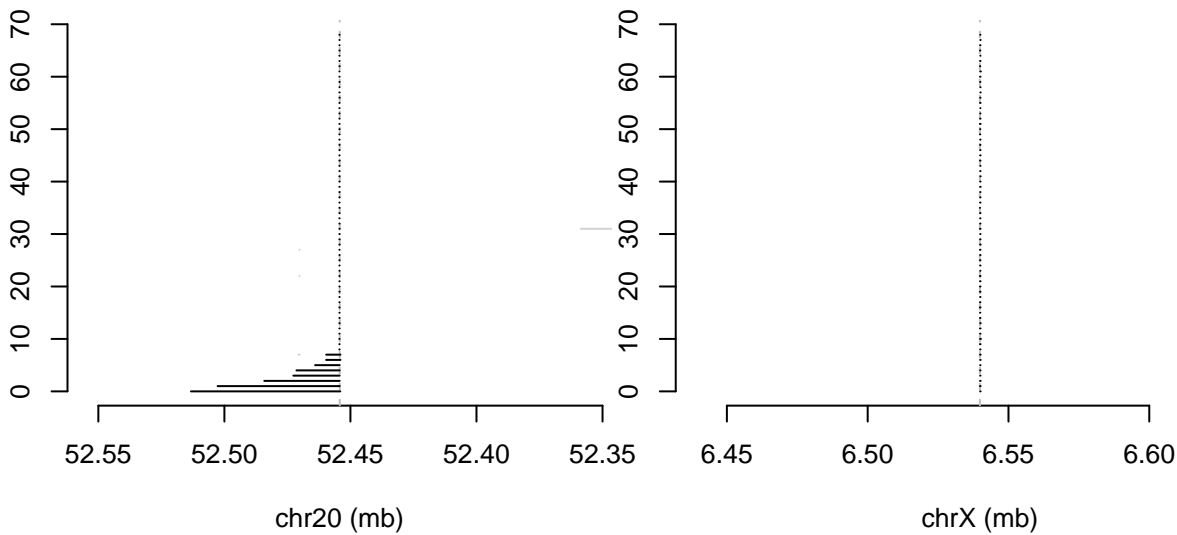

Copy number

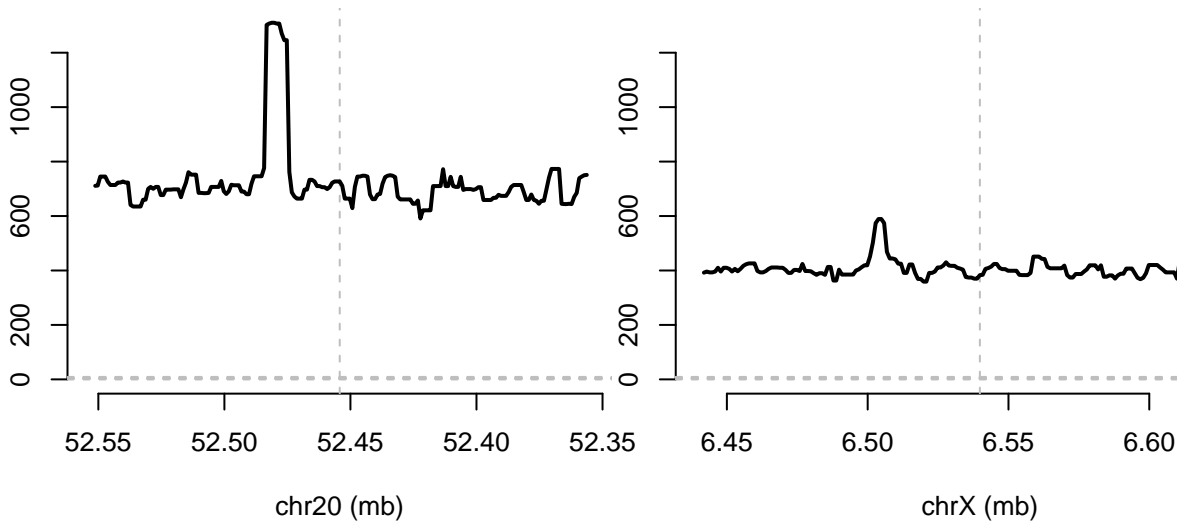

K562 chrX:6,539,842::chr20:52,454,242--

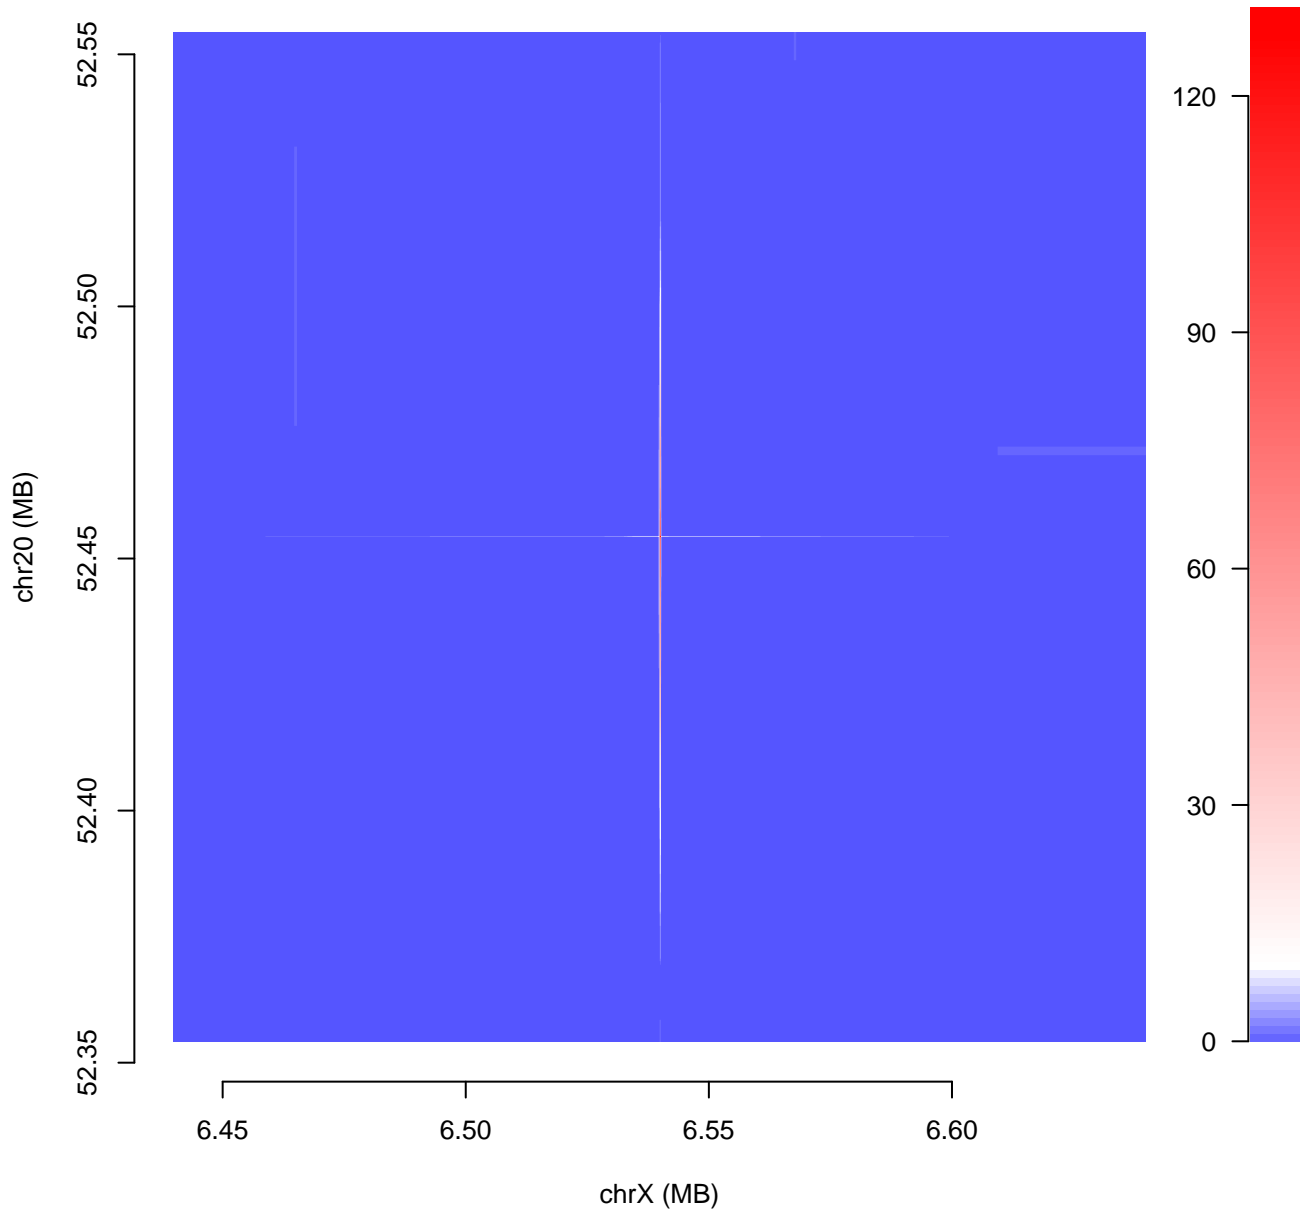

Supplement: Supplemental_Data.zip [file event_375.pdf › event_375.pdf]

Barcode

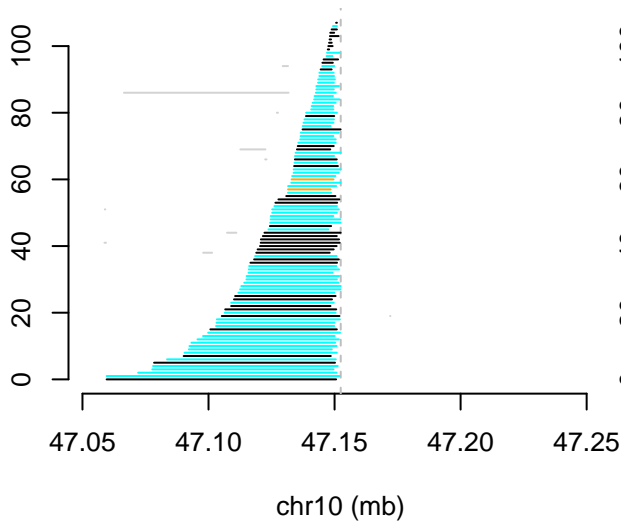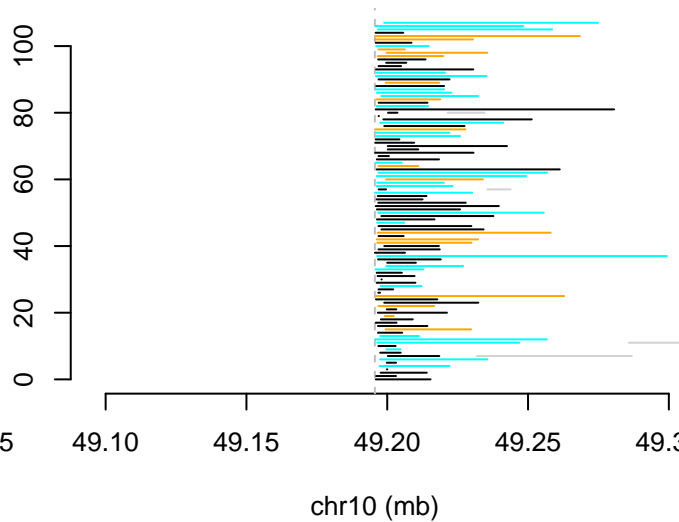

Copy number

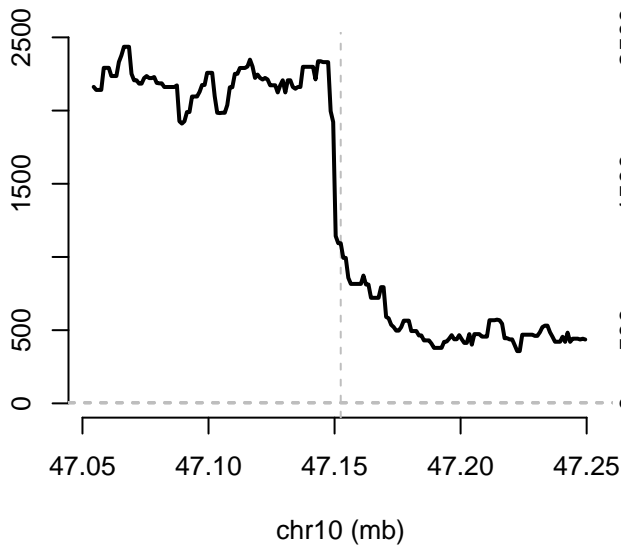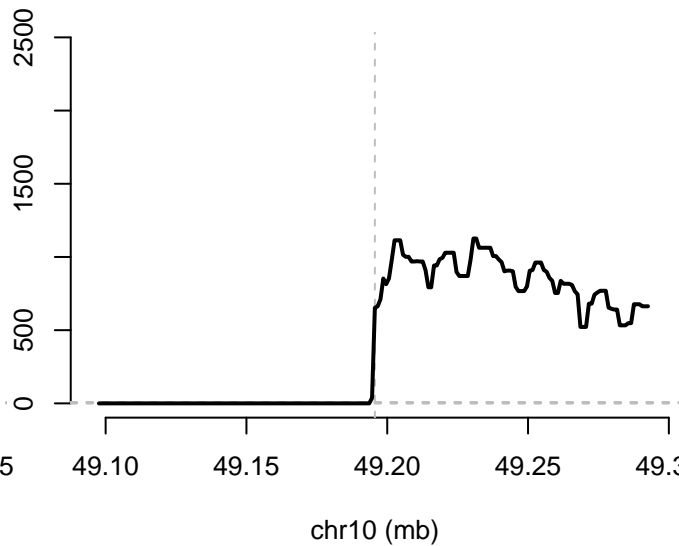

K562 chr10:47,152,450::chr10:49,195,610+-

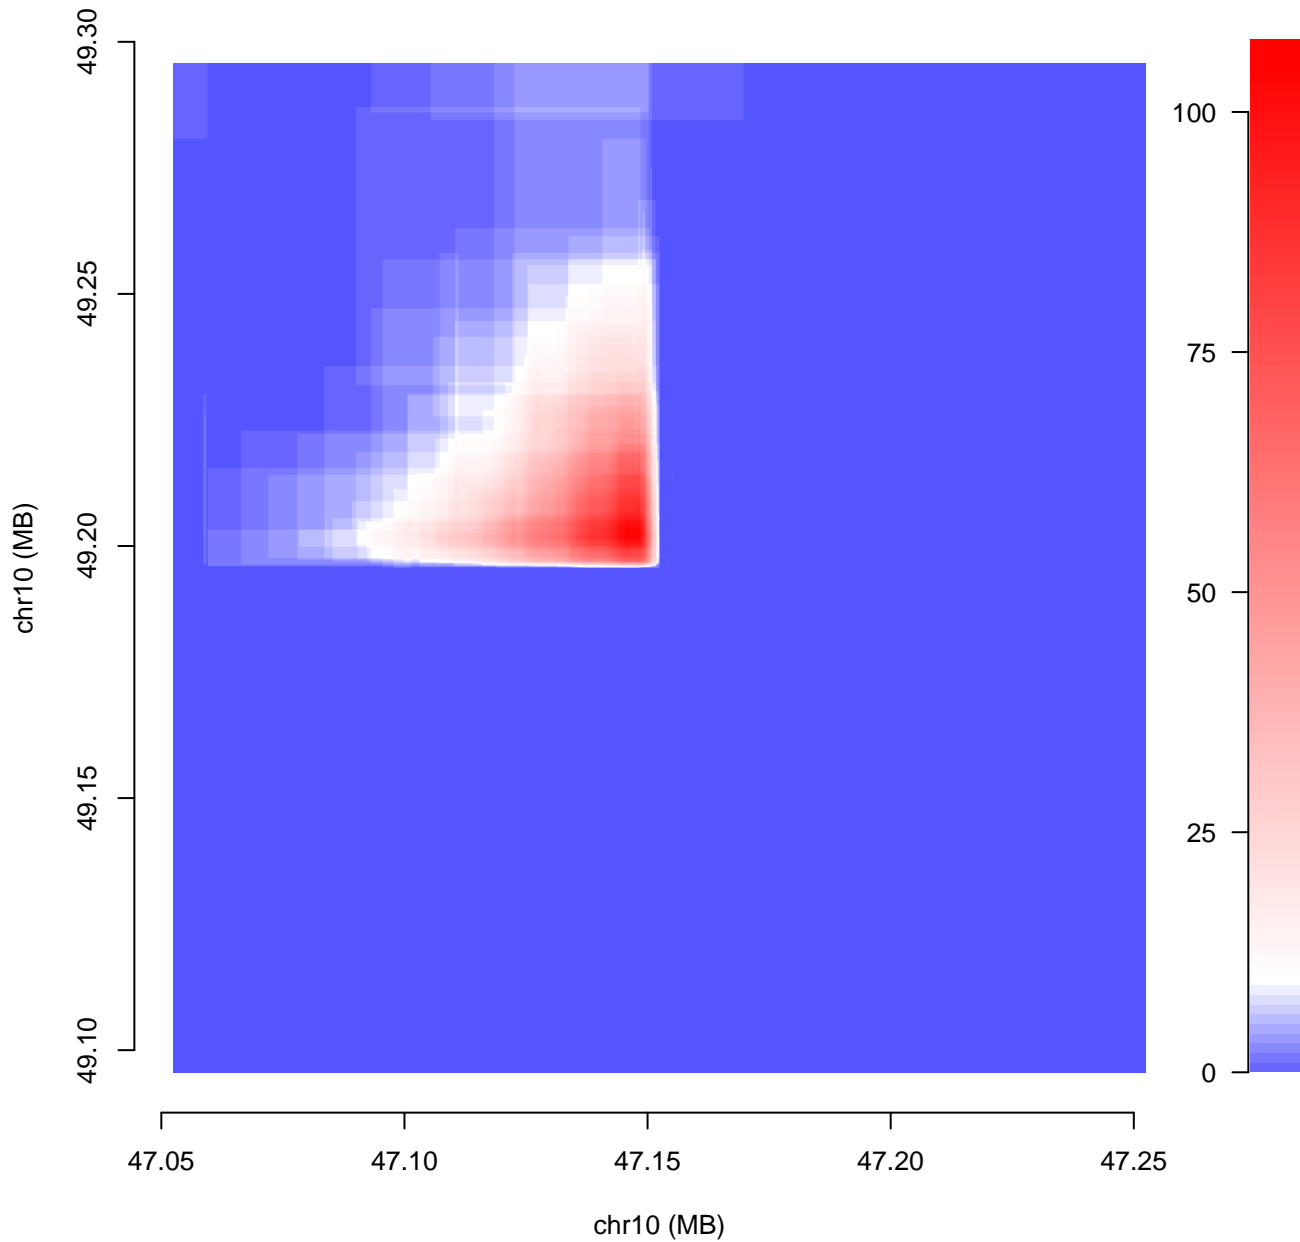

Supplement: Supplemental_Data.zip [file event_376.pdf › event_376.pdf]

Barcode

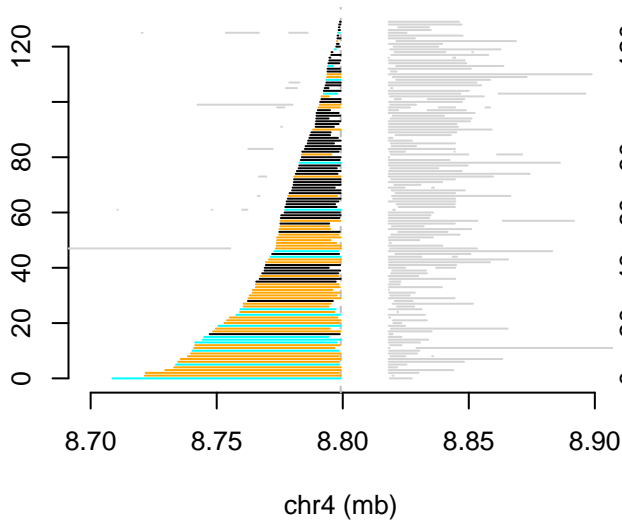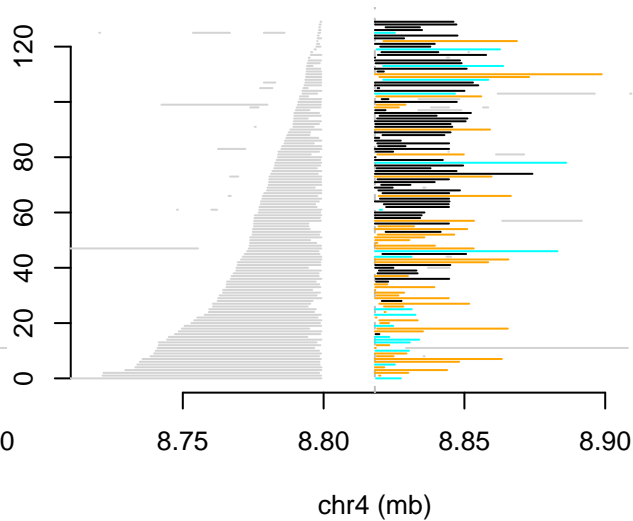

Copy number

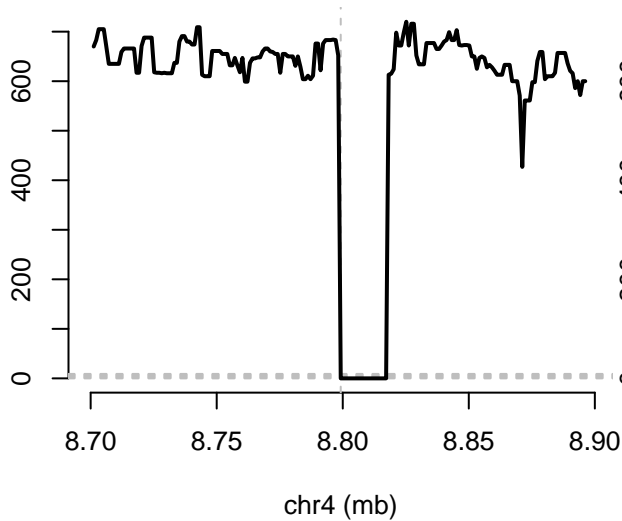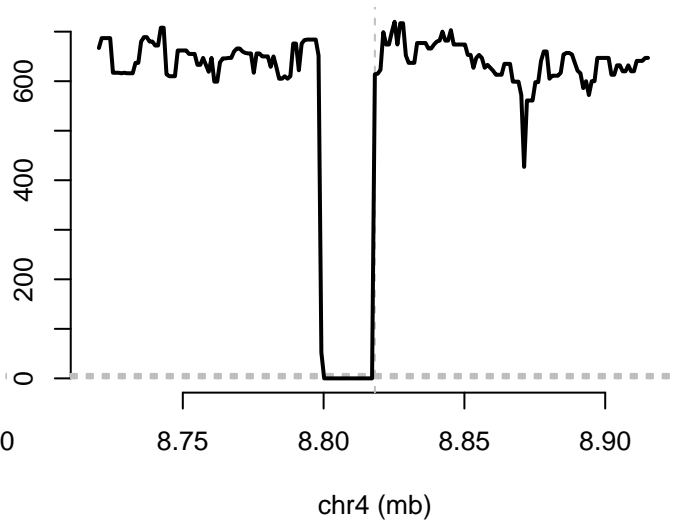

K562 chr4:8,818,202::chr4:8,799,203--+

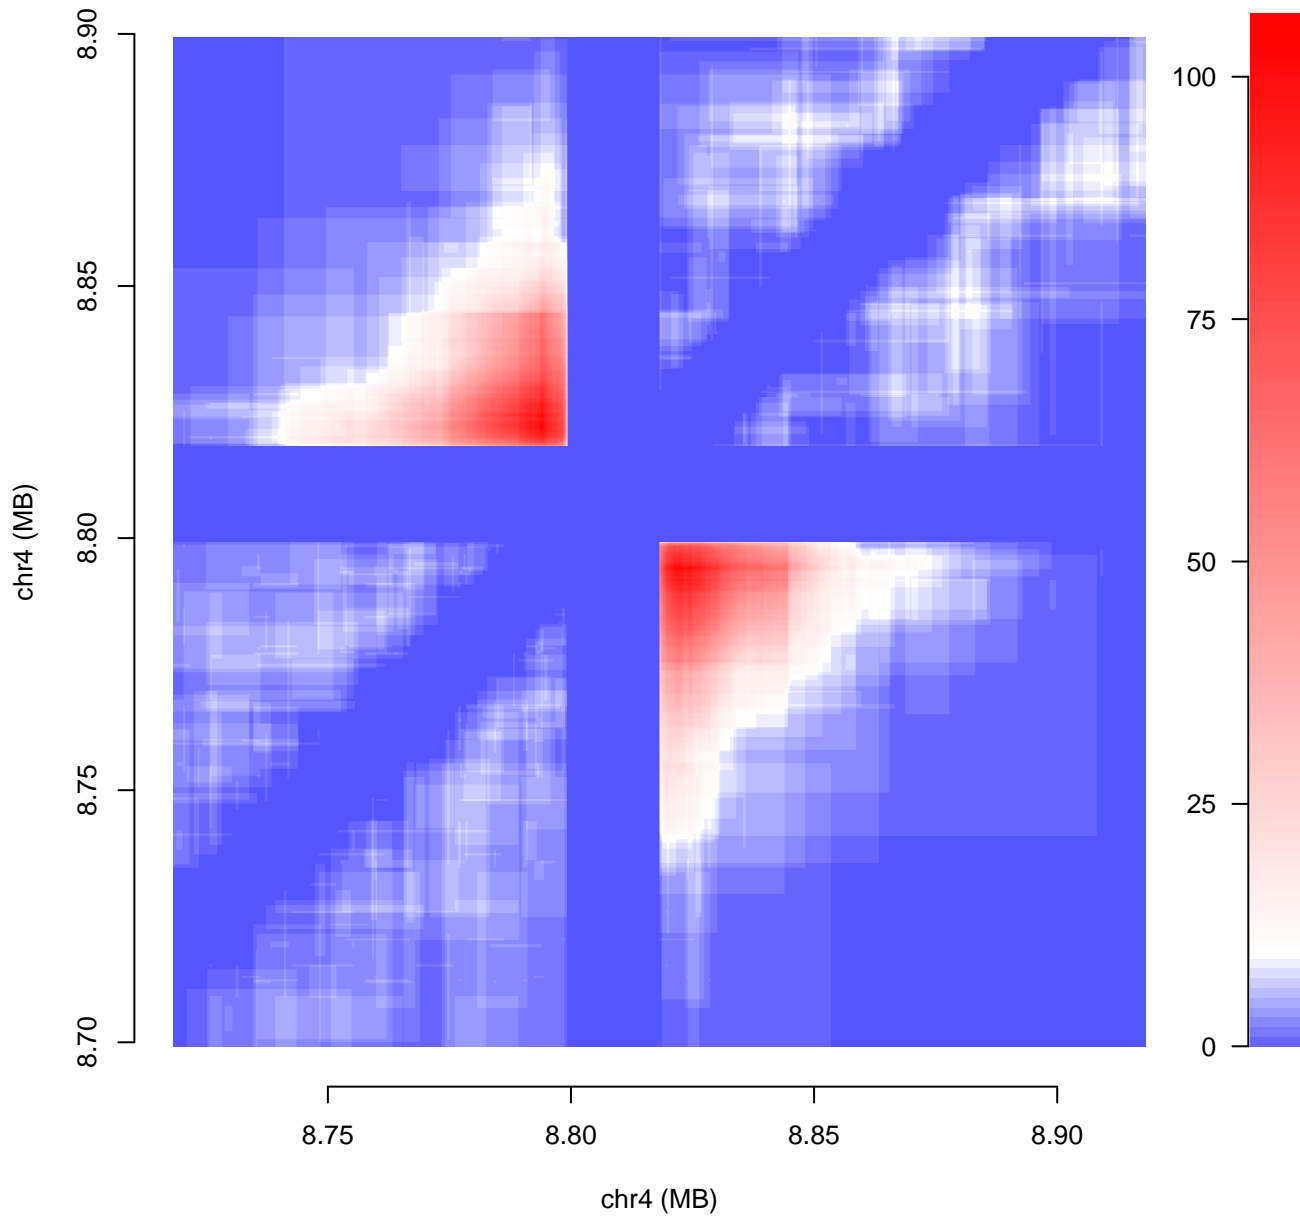

Supplement: Supplemental_Data.zip [file event_377.pdf › event_377.pdf]

Barcode

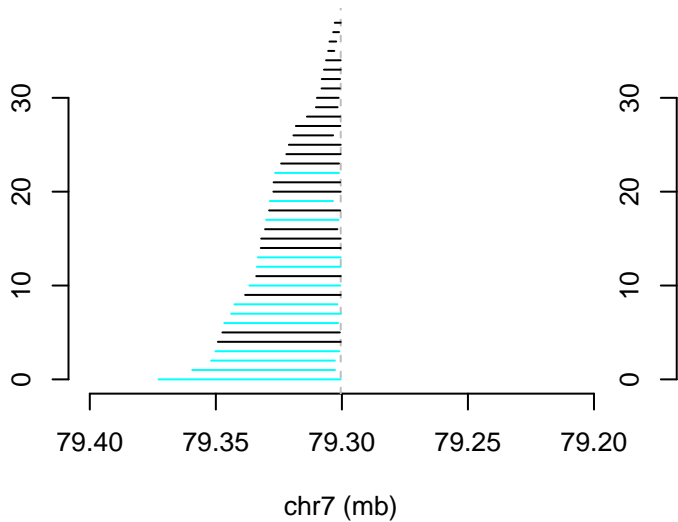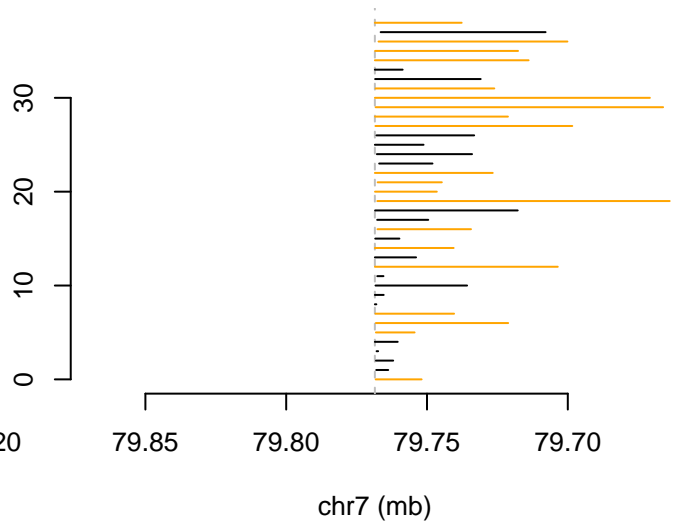

Copy number

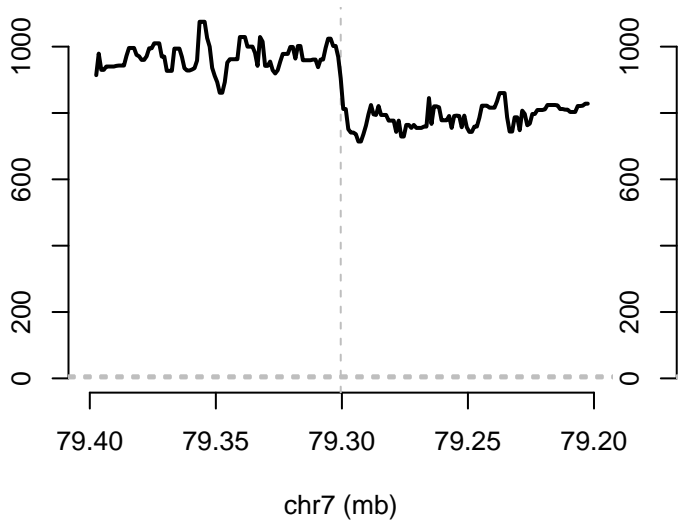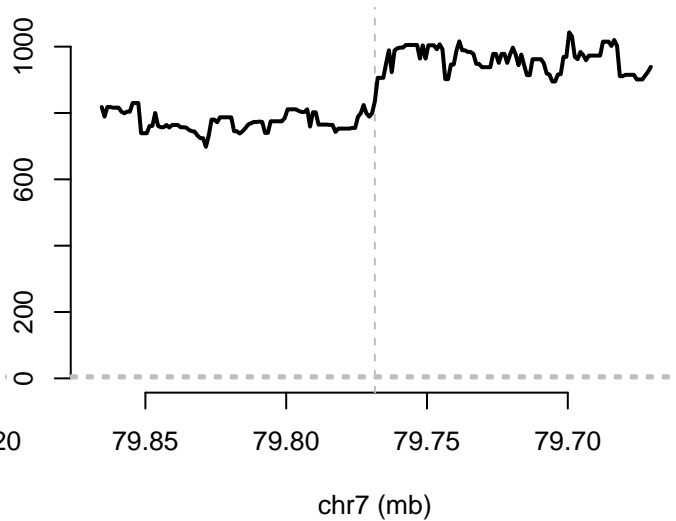

K562 chr7:79,768,515::chr7:79,300,459+-

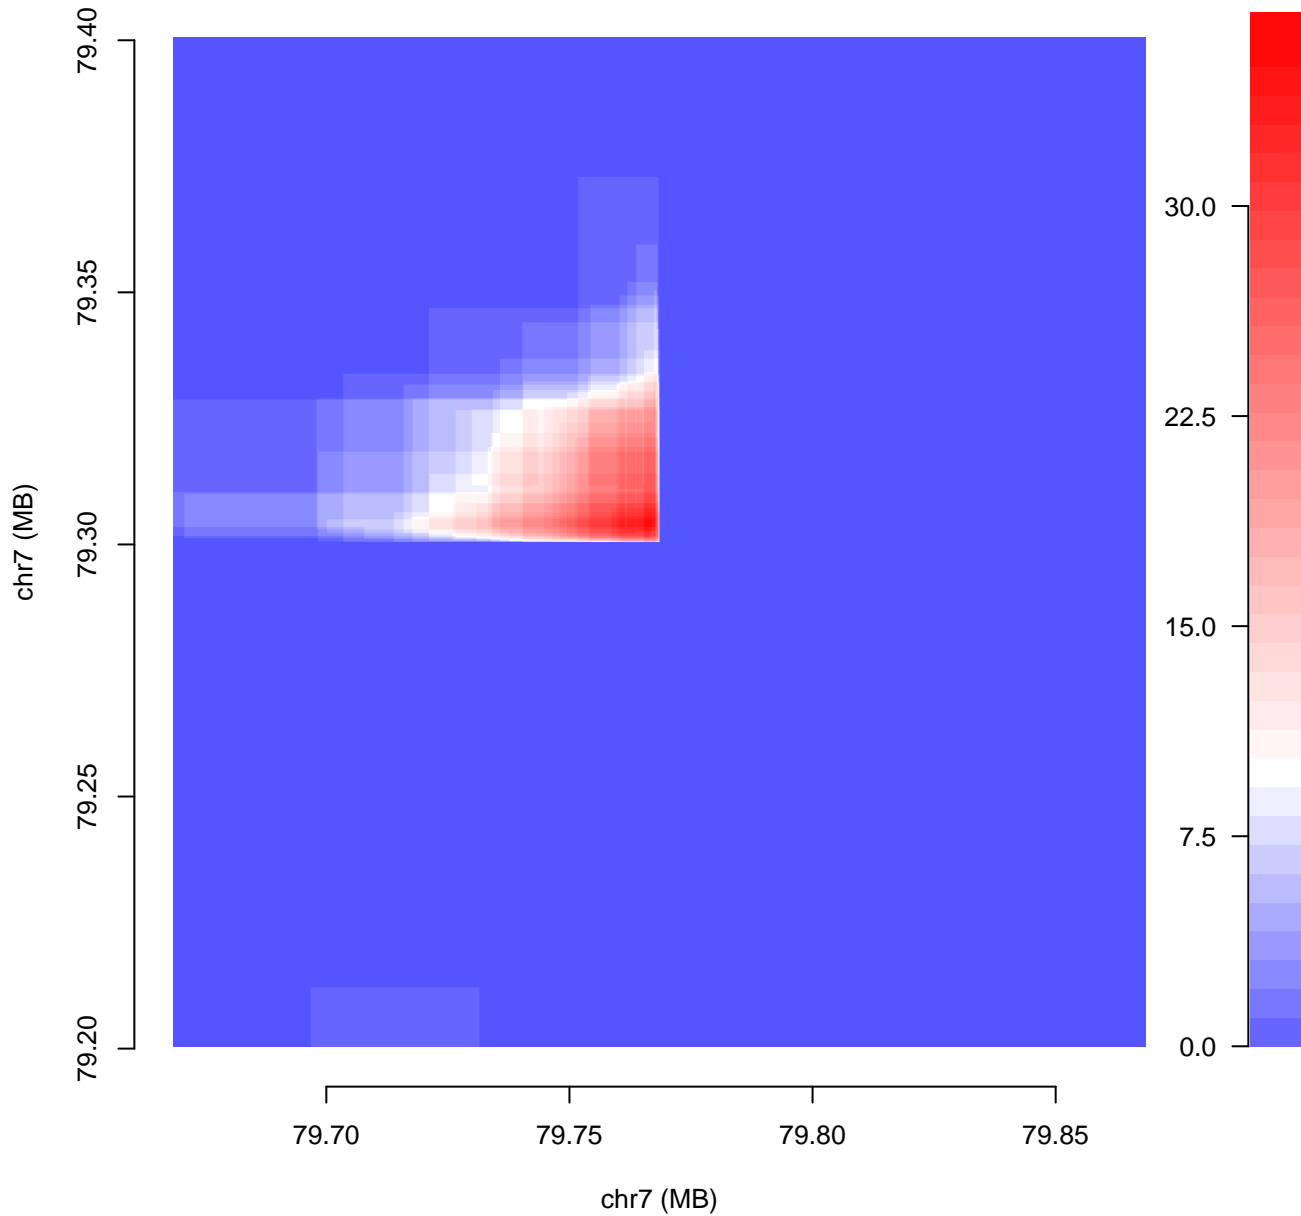

Supplement: Supplemental_Data.zip [file event_378.pdf › event_378.pdf]

Barcode

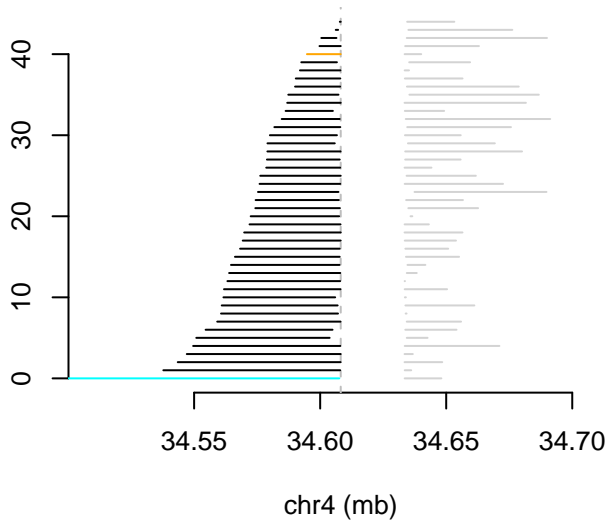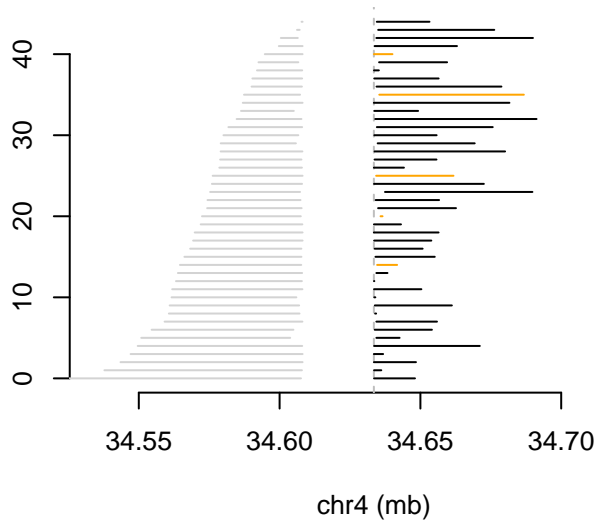

Copy number

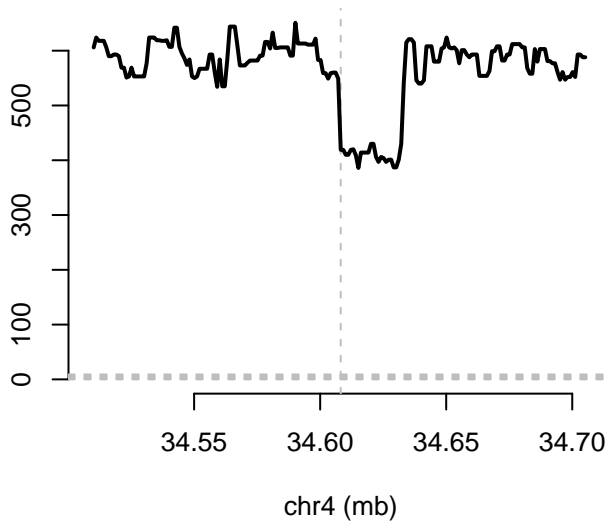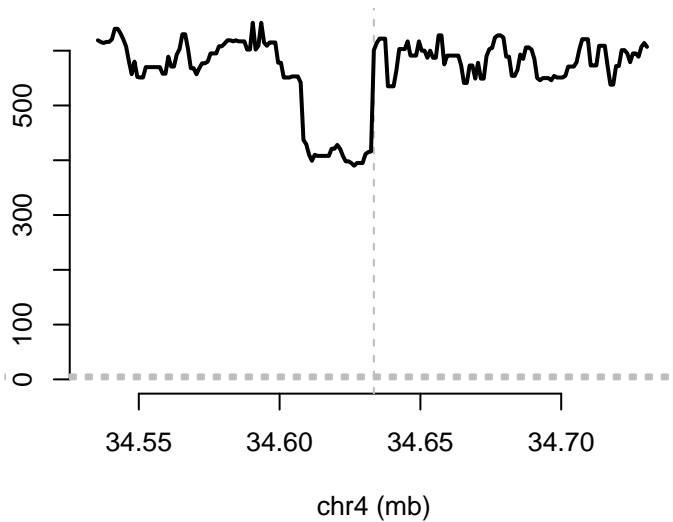

K562 chr4:34,633,478::chr4:34,608,165-+

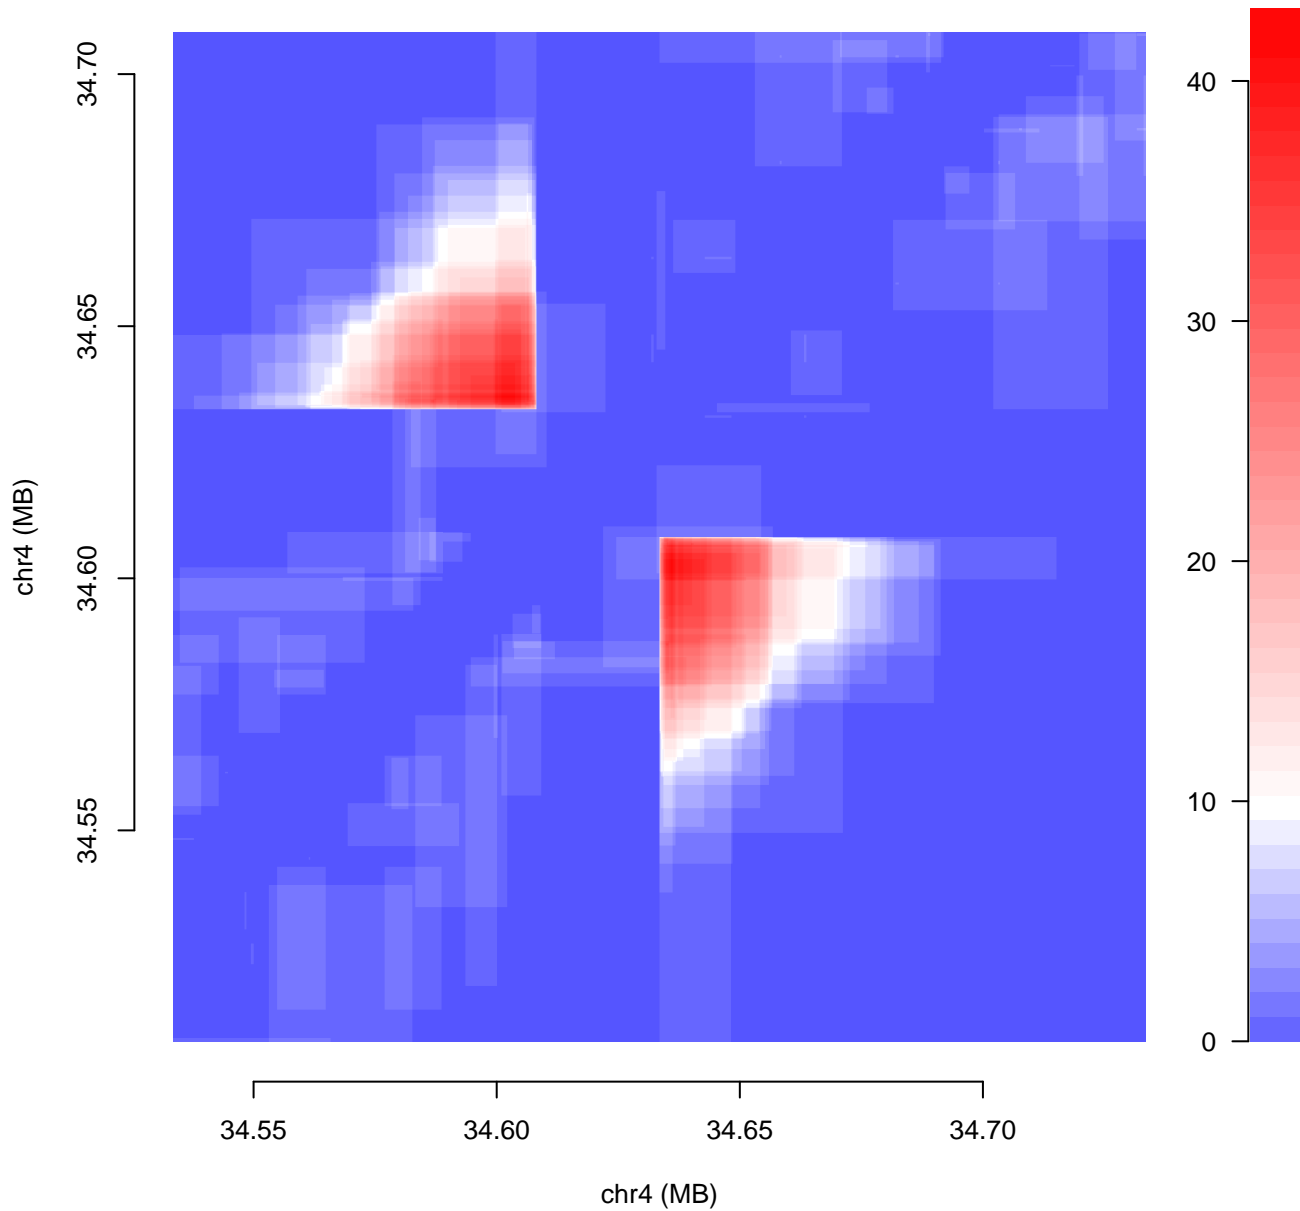

Supplement: Supplemental_Data.zip [file event_379.pdf › event_379.pdf]

Barcode

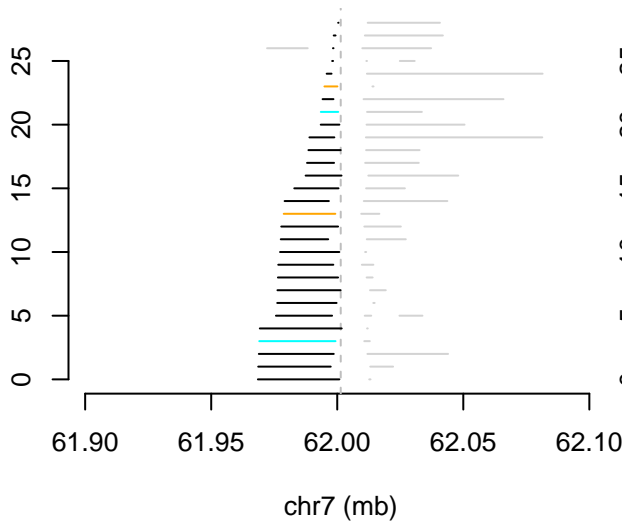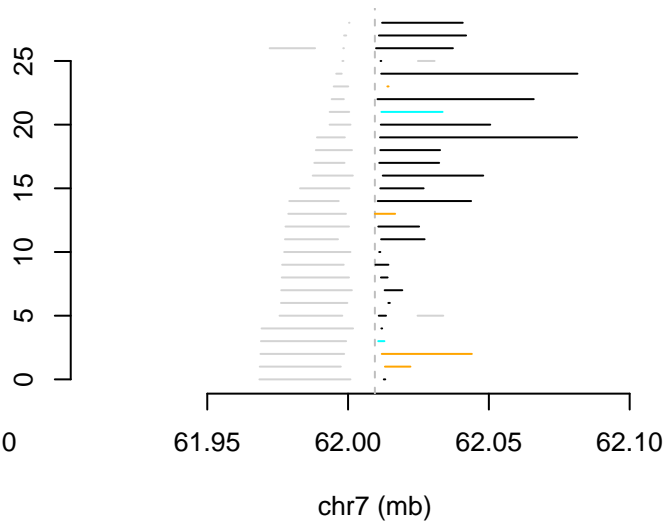

Copy number

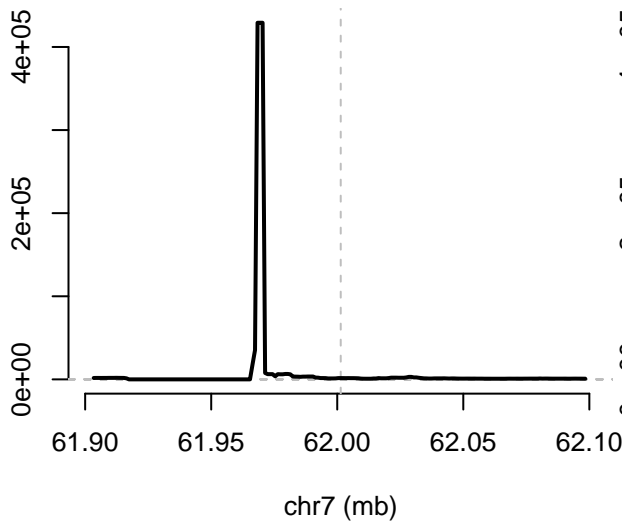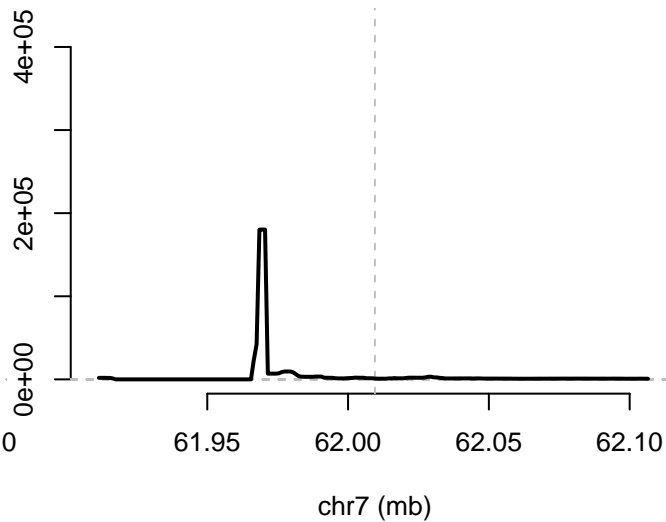

K562 chr7:62,009,518::chr7:62,001,387-+

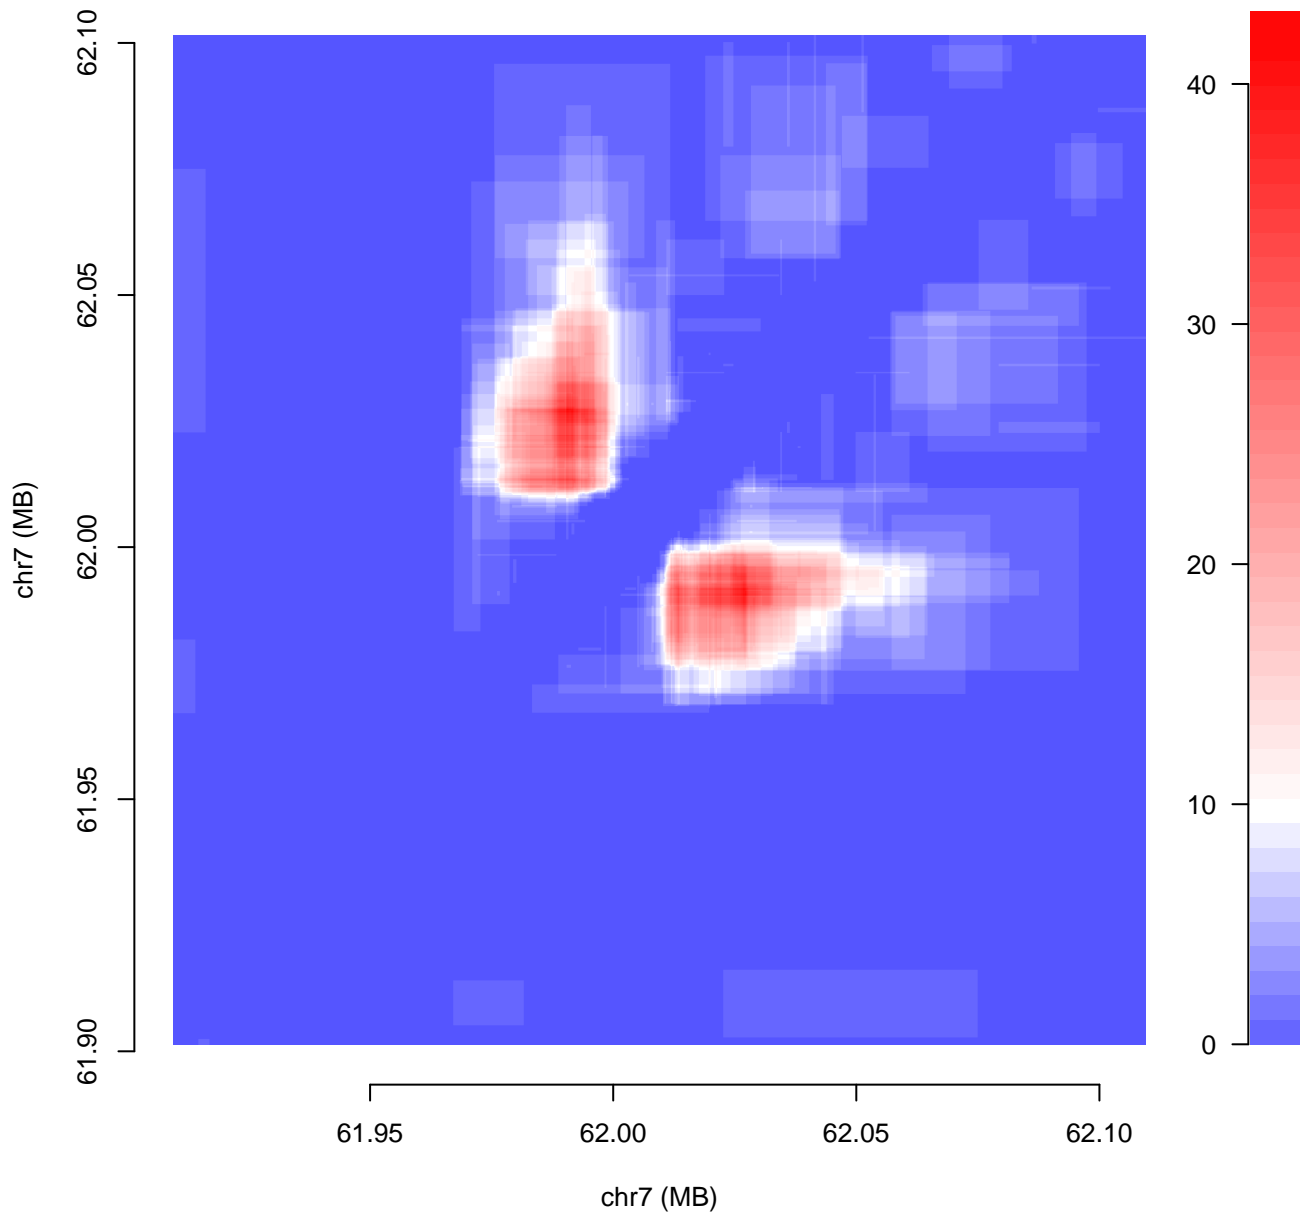

Supplement: Supplemental_Data.zip [file event_38.pdf › event_38.pdf]

Barcode

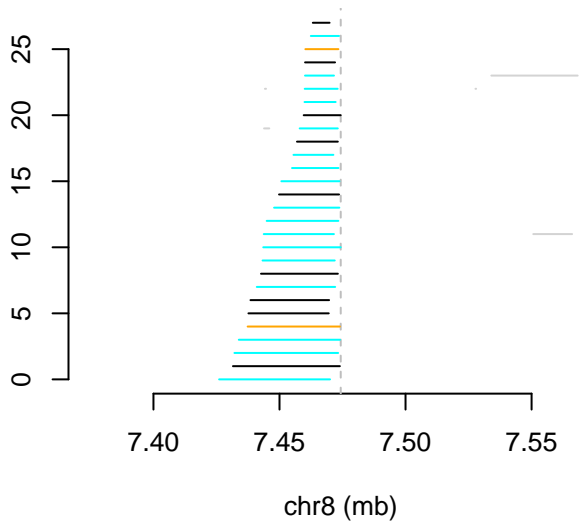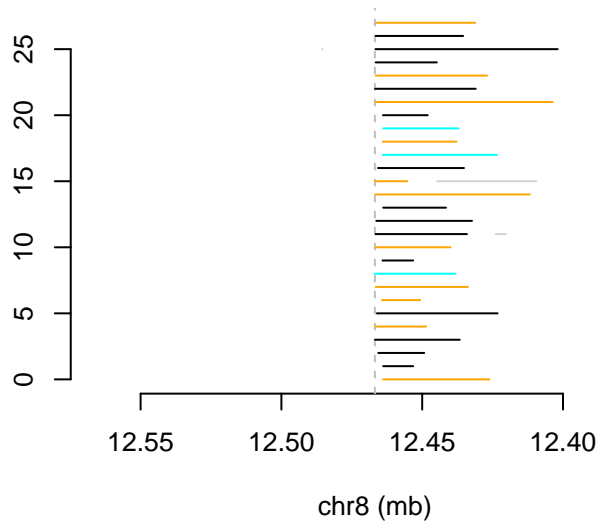

Copy number

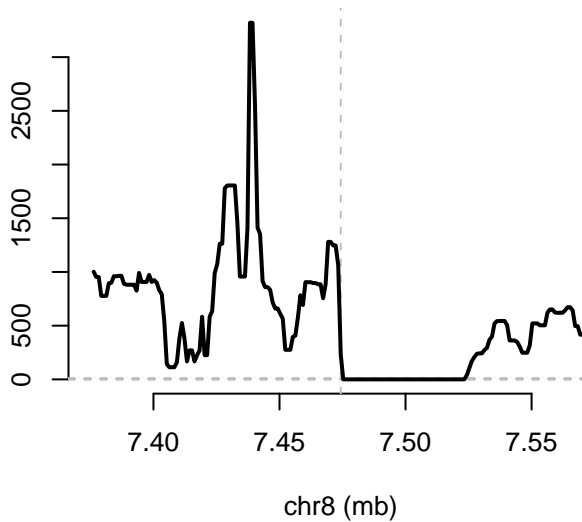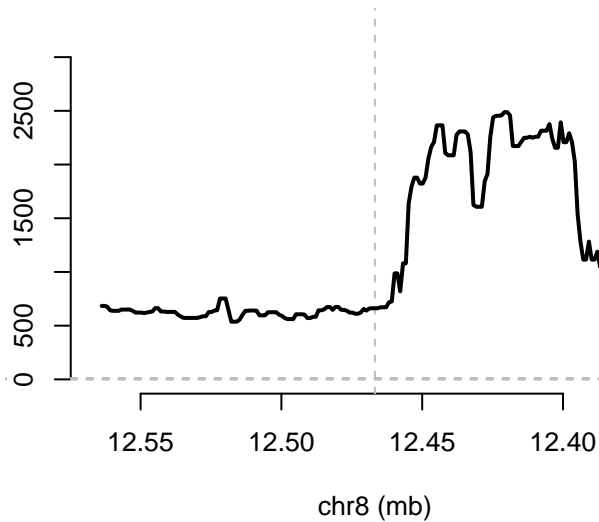

**K562 chr8:7,474,296::chr8:12,466,807++**

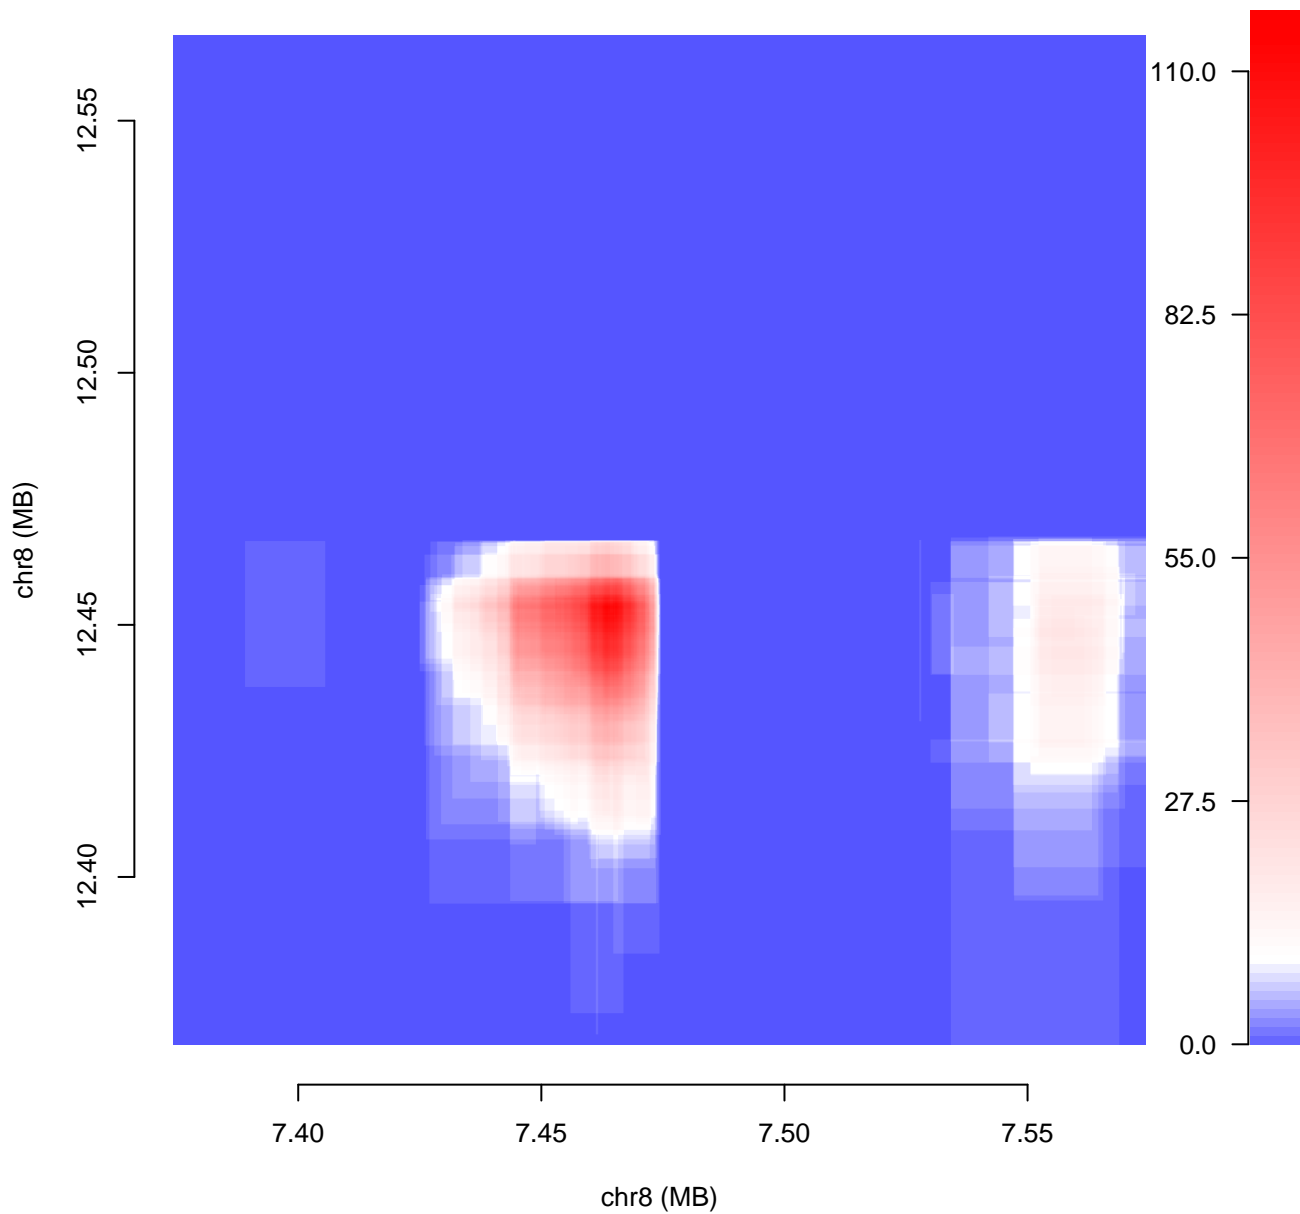

Supplement: Supplemental_Data.zip [file event_380.pdf › event_380.pdf]

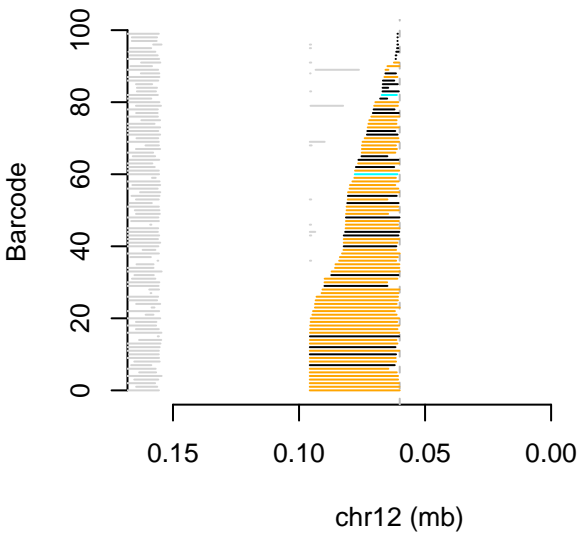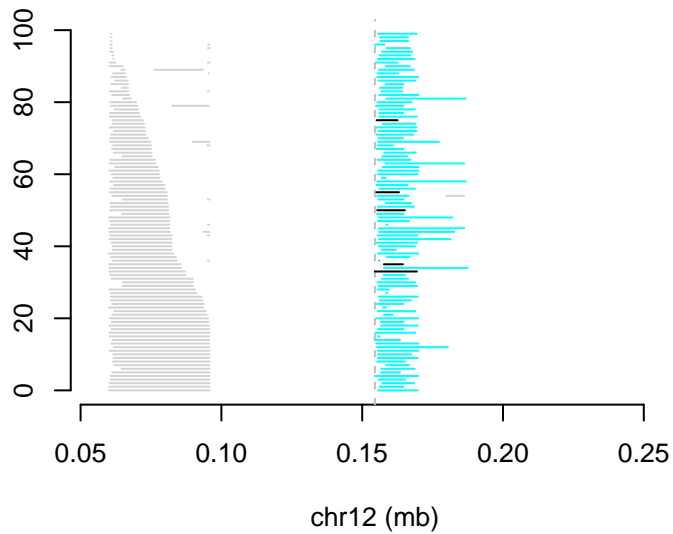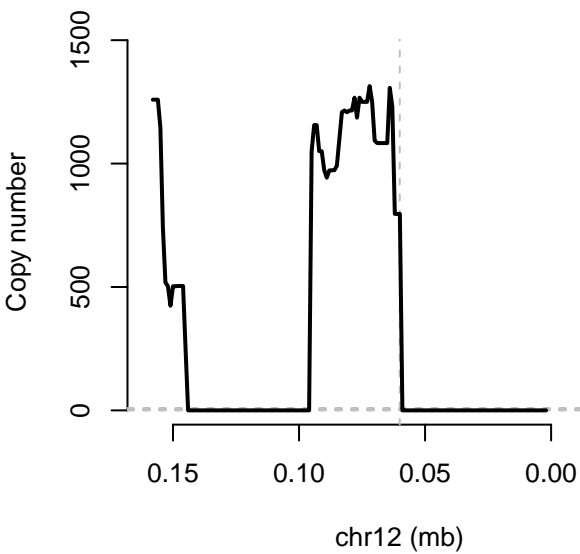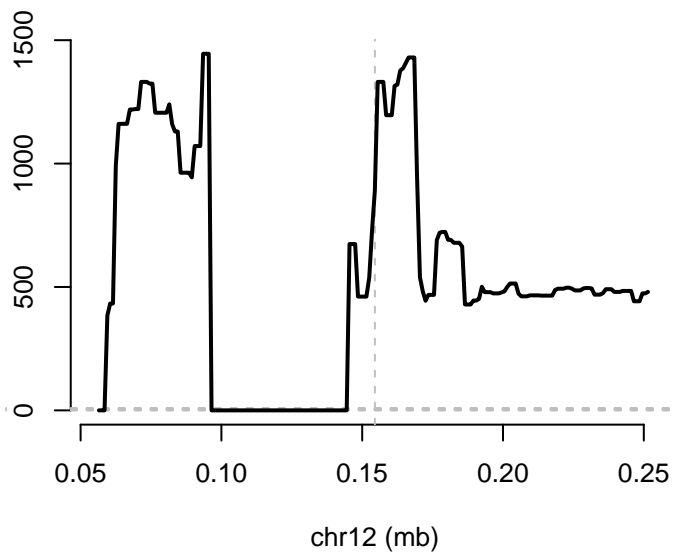

K562 chr12:60,050::chr12:154,499--

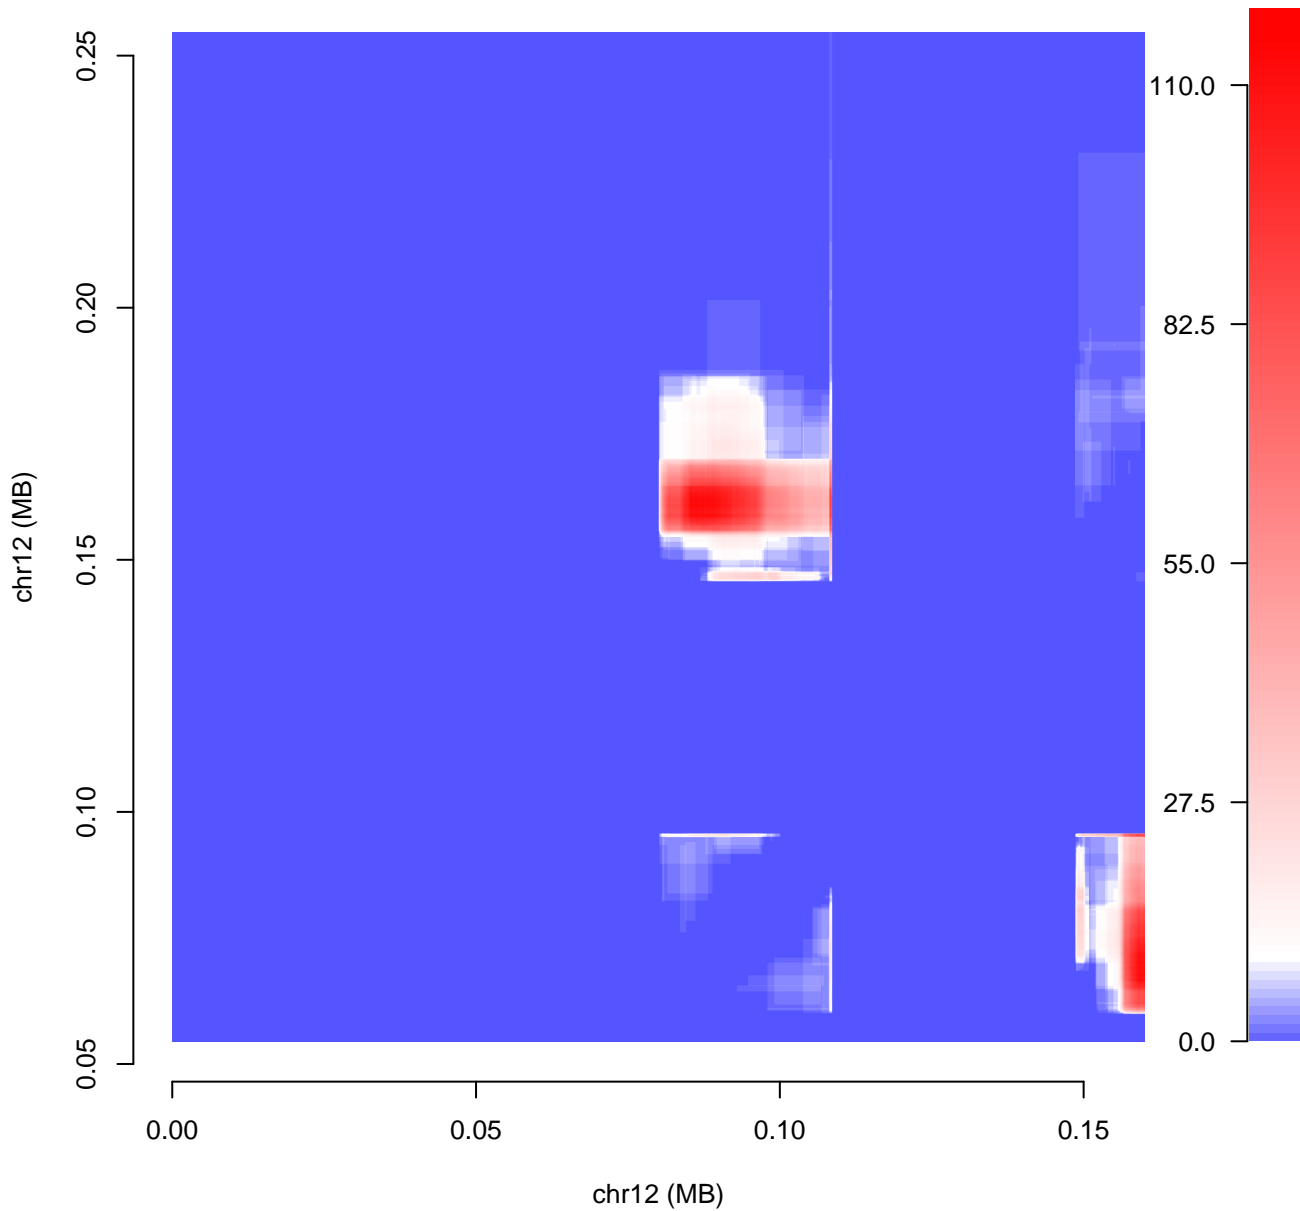

Supplement: Supplemental_Data.zip [file event_381.pdf › event_381.pdf]

Barcode

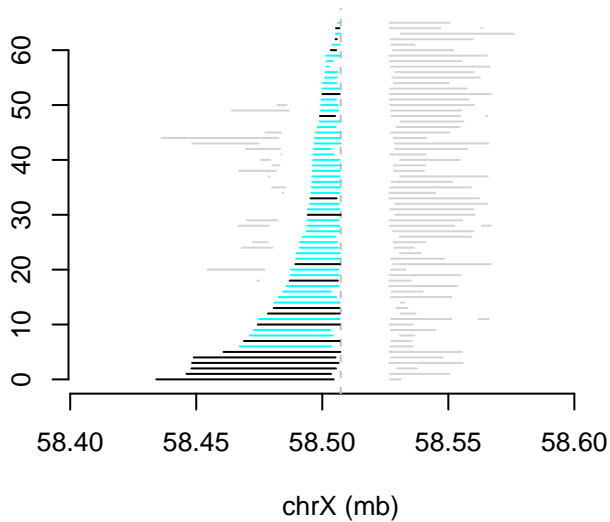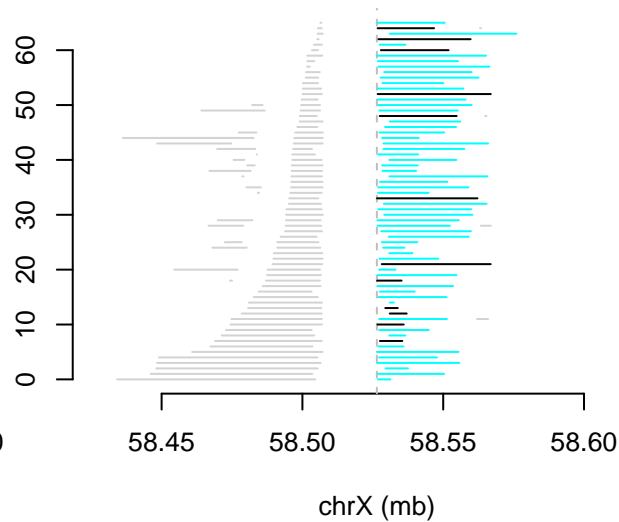

Copy number

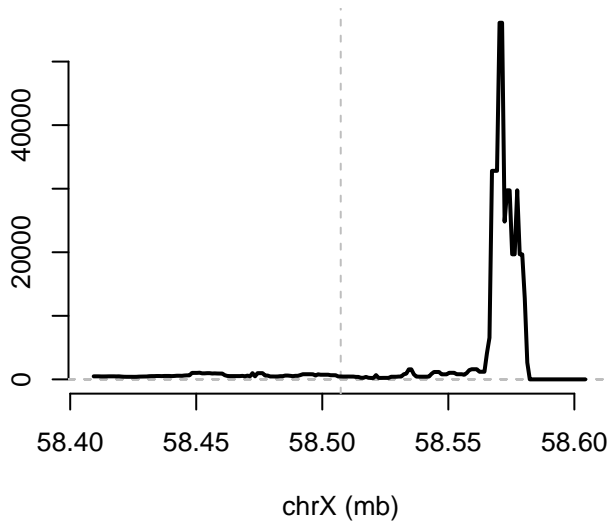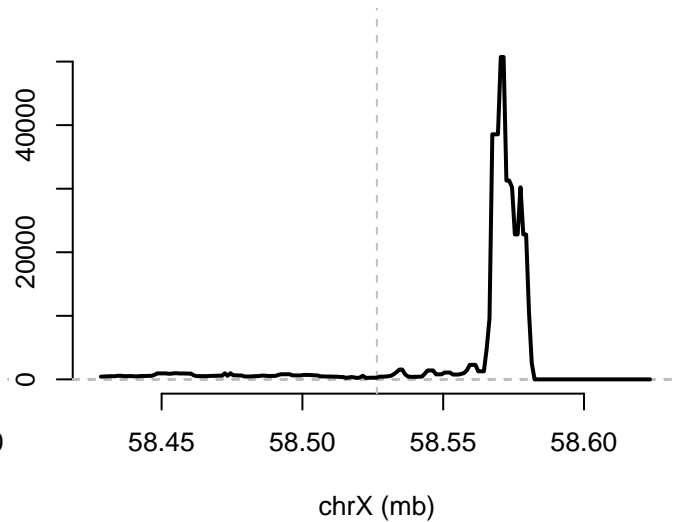

K562 chrX:58,507,324::chrX:58,526,441+-

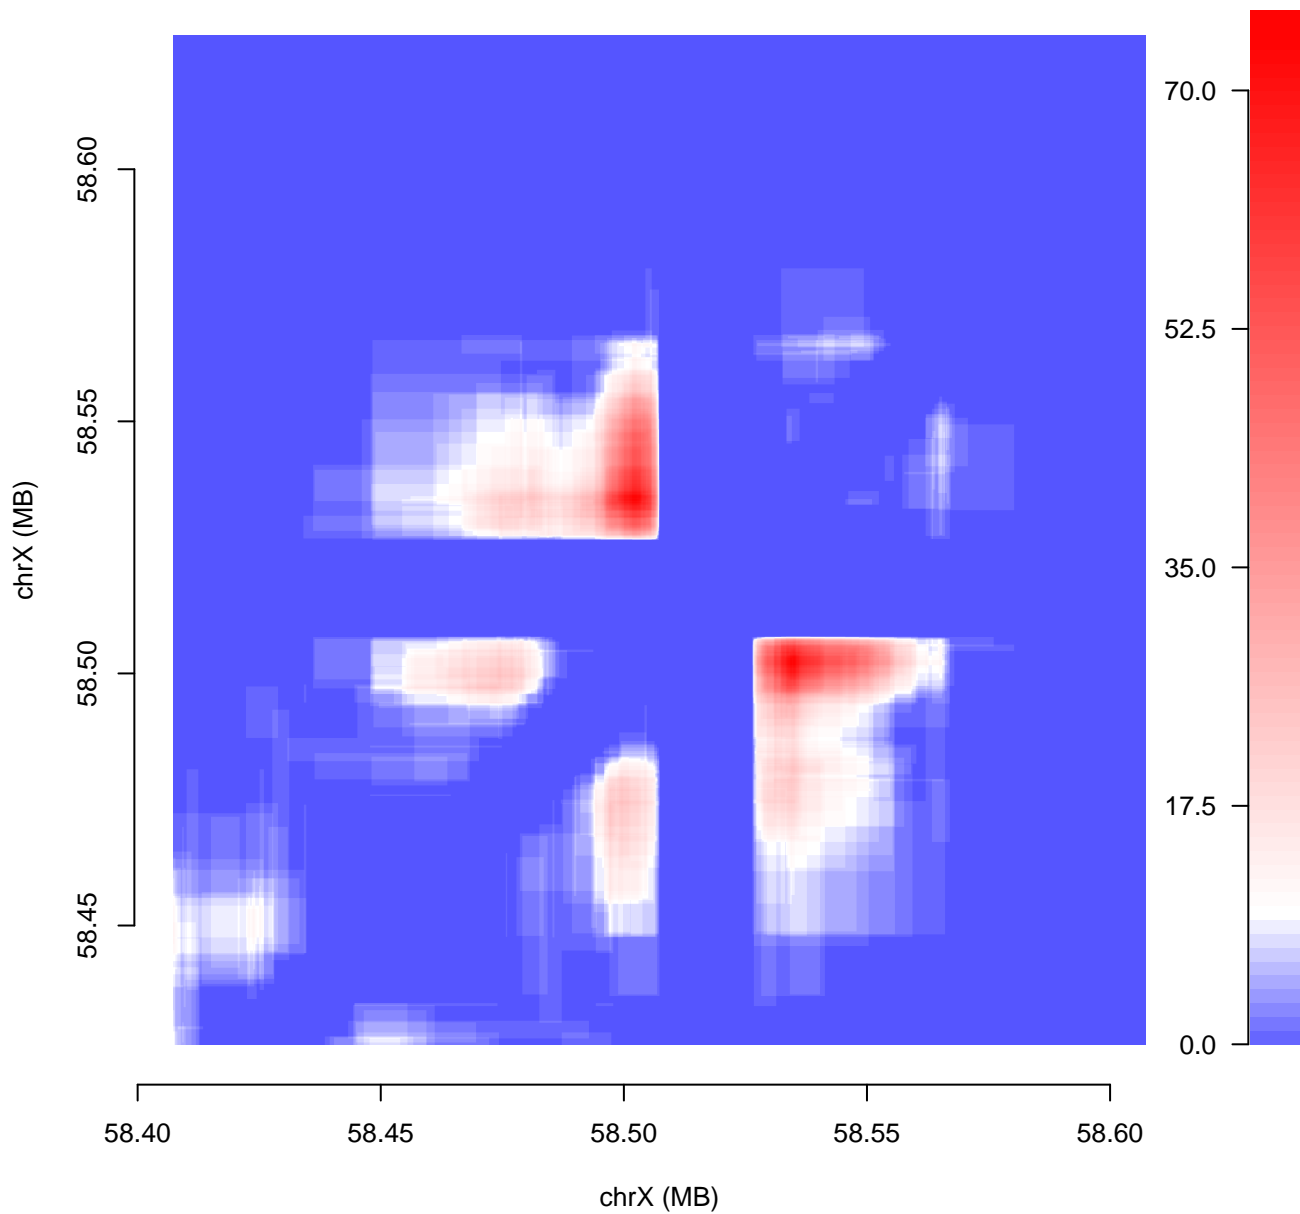

Supplement: Supplemental_Data.zip [file event_382.pdf › event_382.pdf]

Barcode

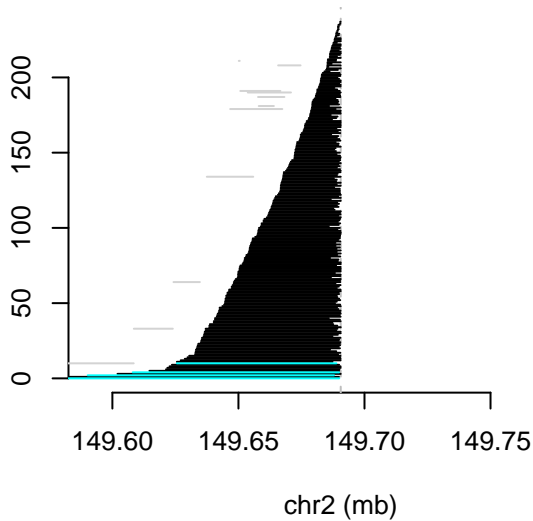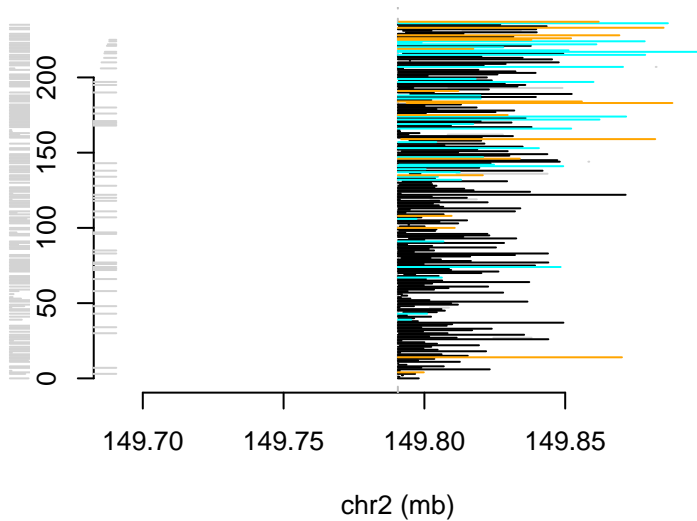

Copy number

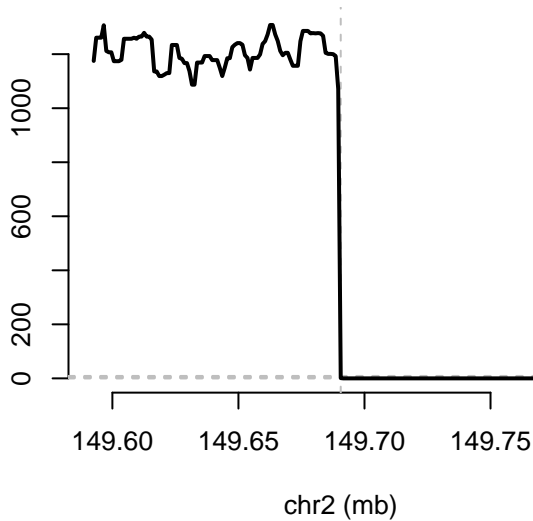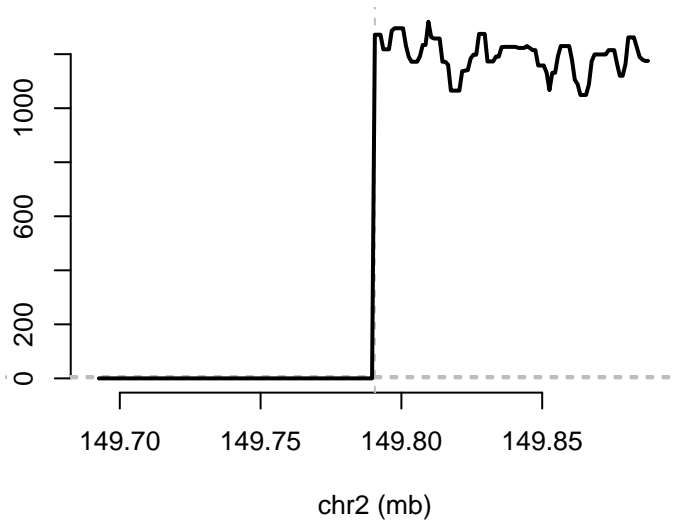

K562 chr2:149,790,577::chr2:149,690,583-+

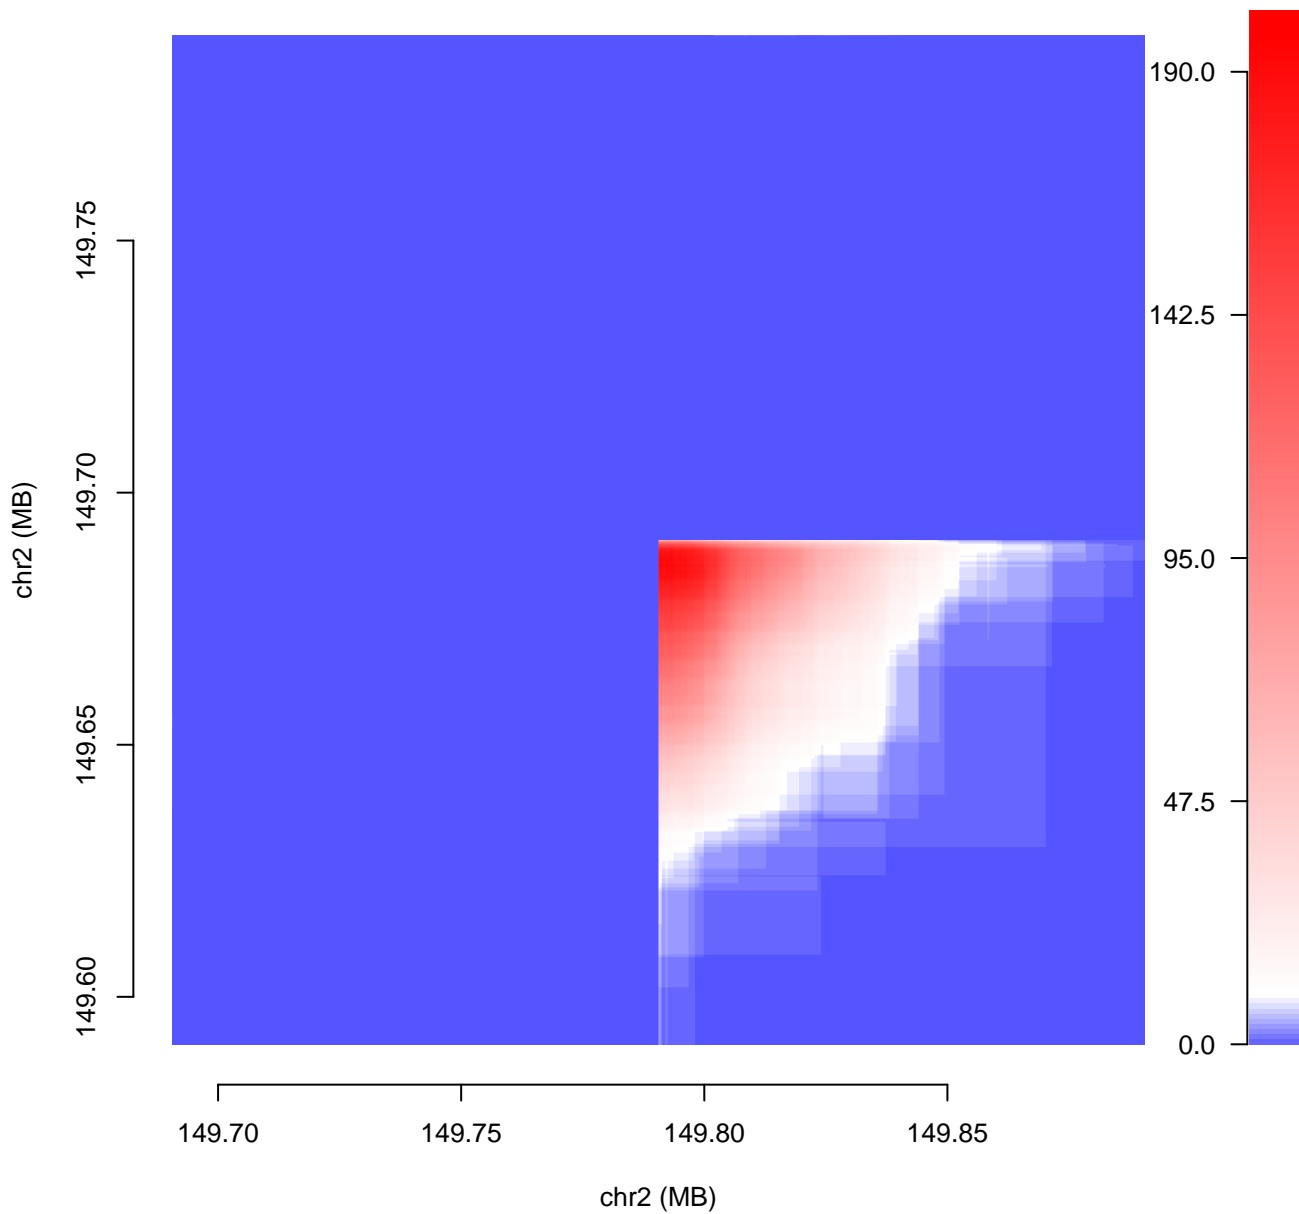

Supplement: Supplemental_Data.zip [file event_383.pdf › event_383.pdf]

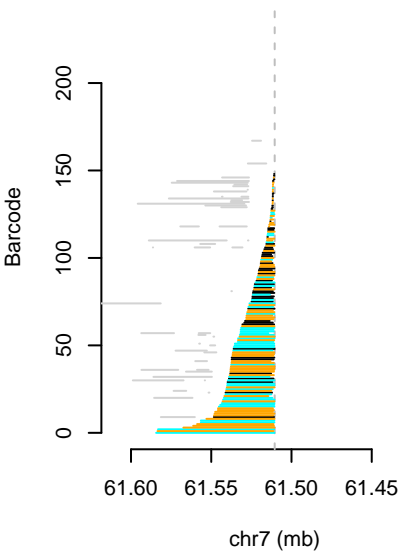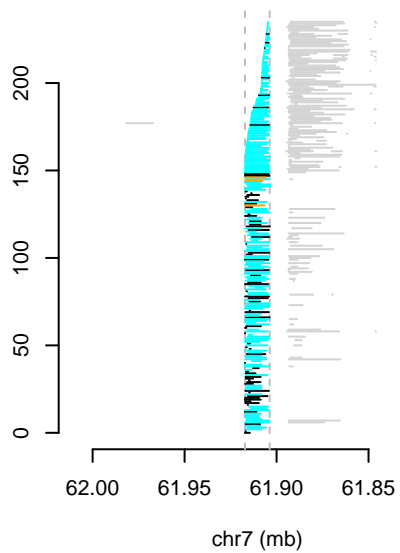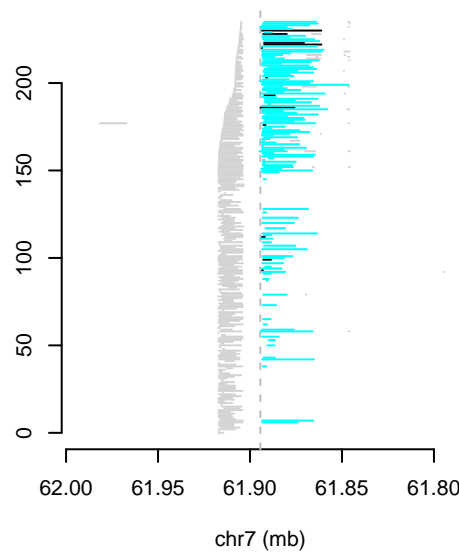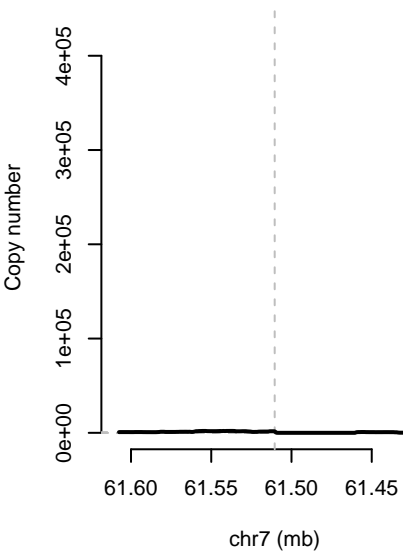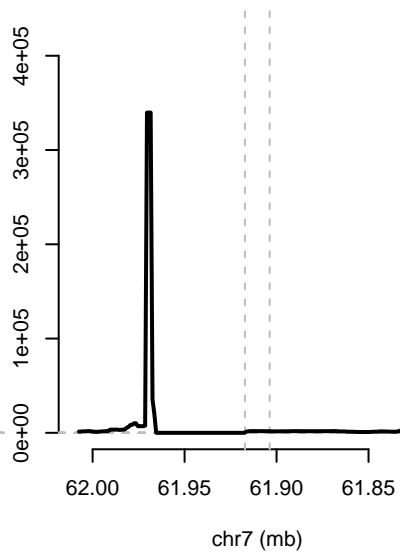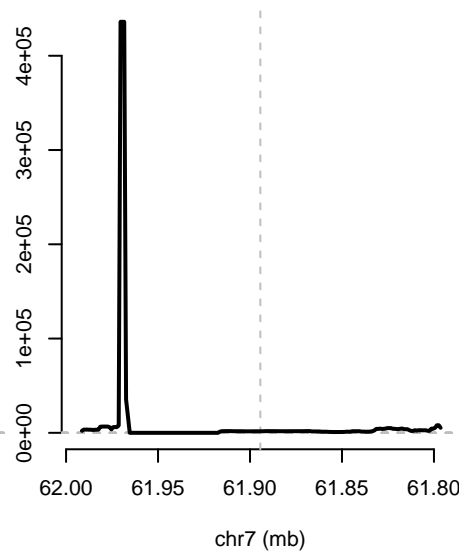

K562 chr7:61,903,727::chr7:61,894,381-+

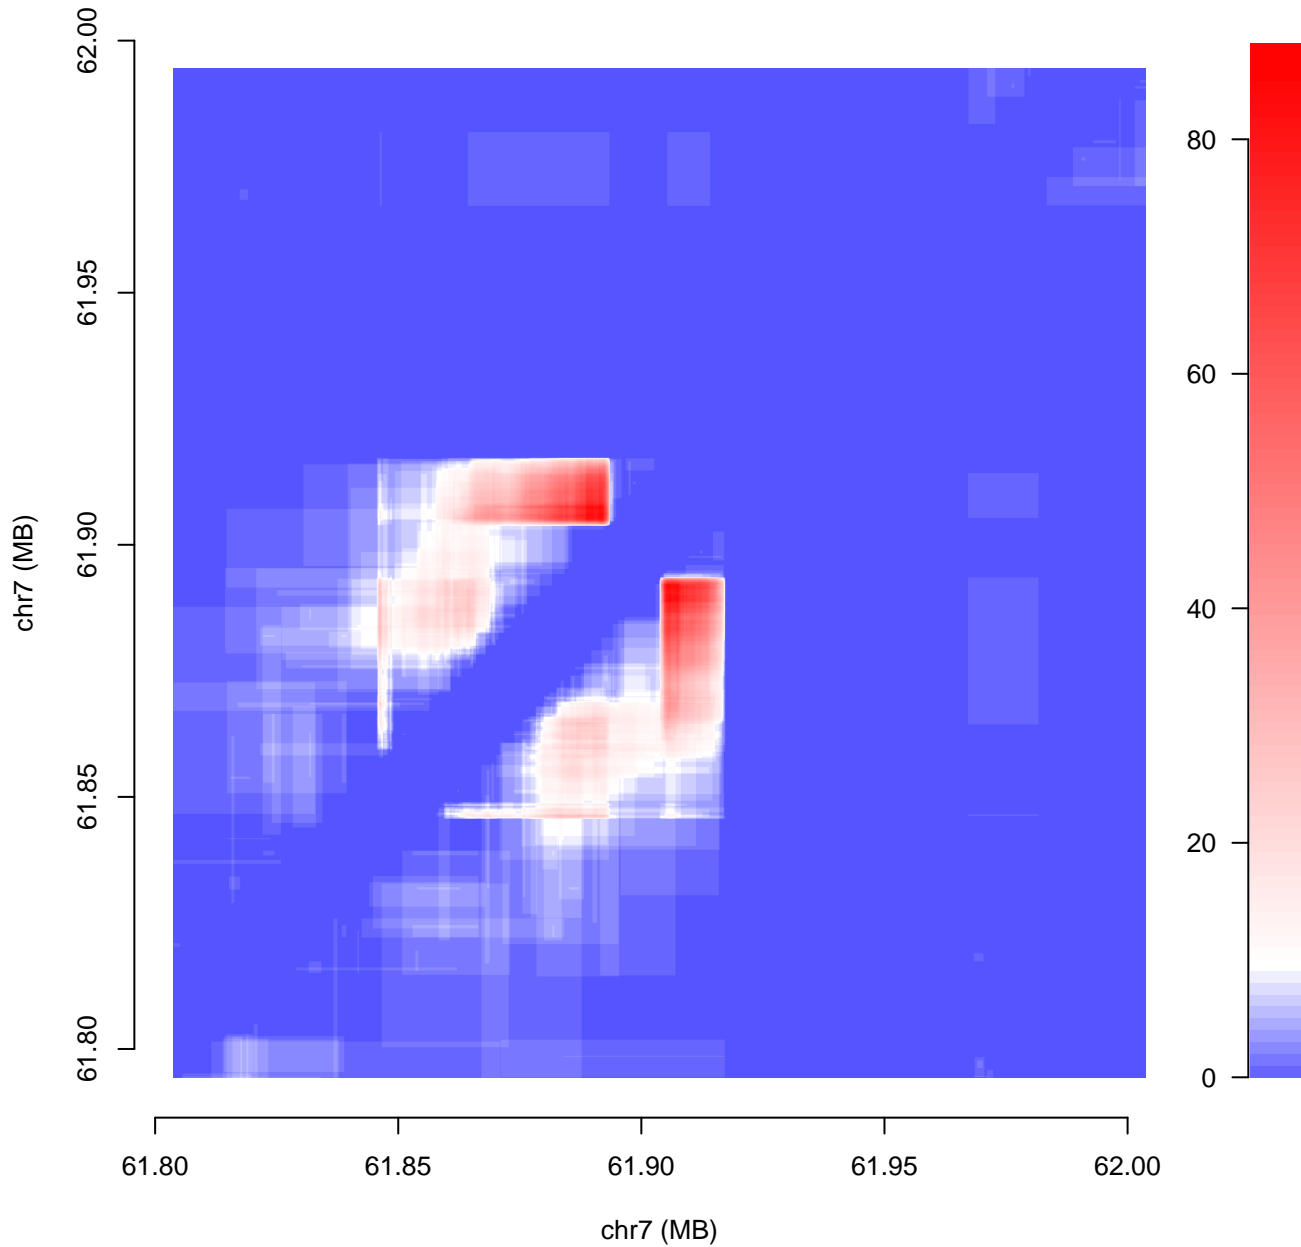

K562 chr7:61,903,727::chr7:61,917,159-+

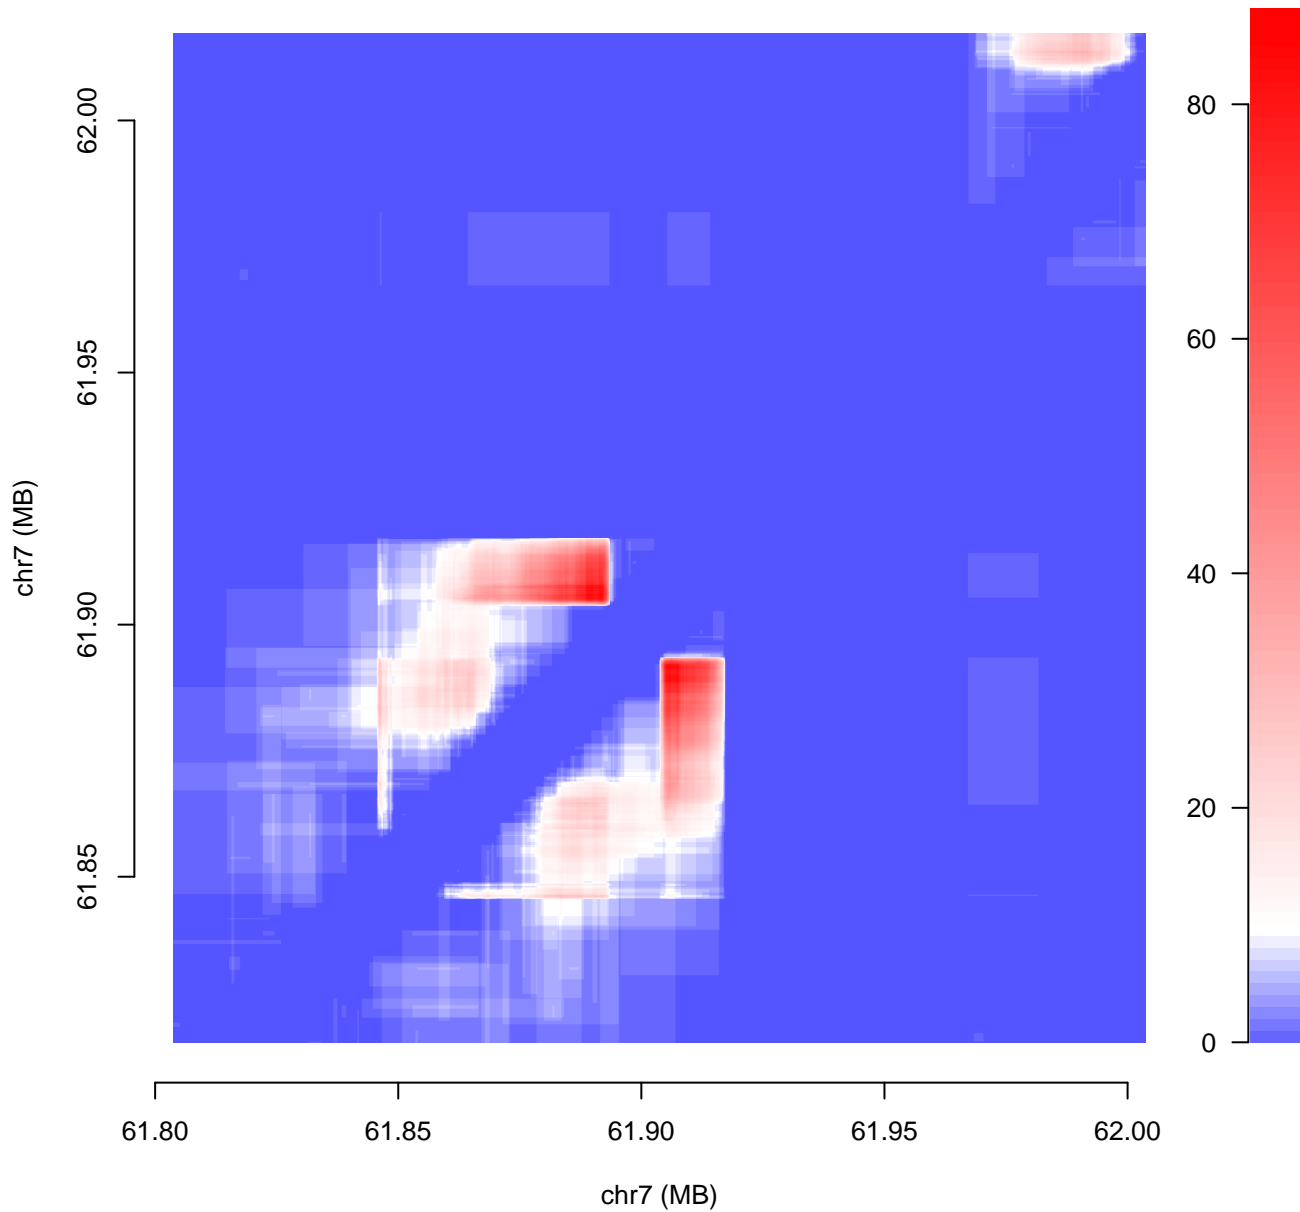

K562 chr7:61,510,469::chr7:61,917,159-+

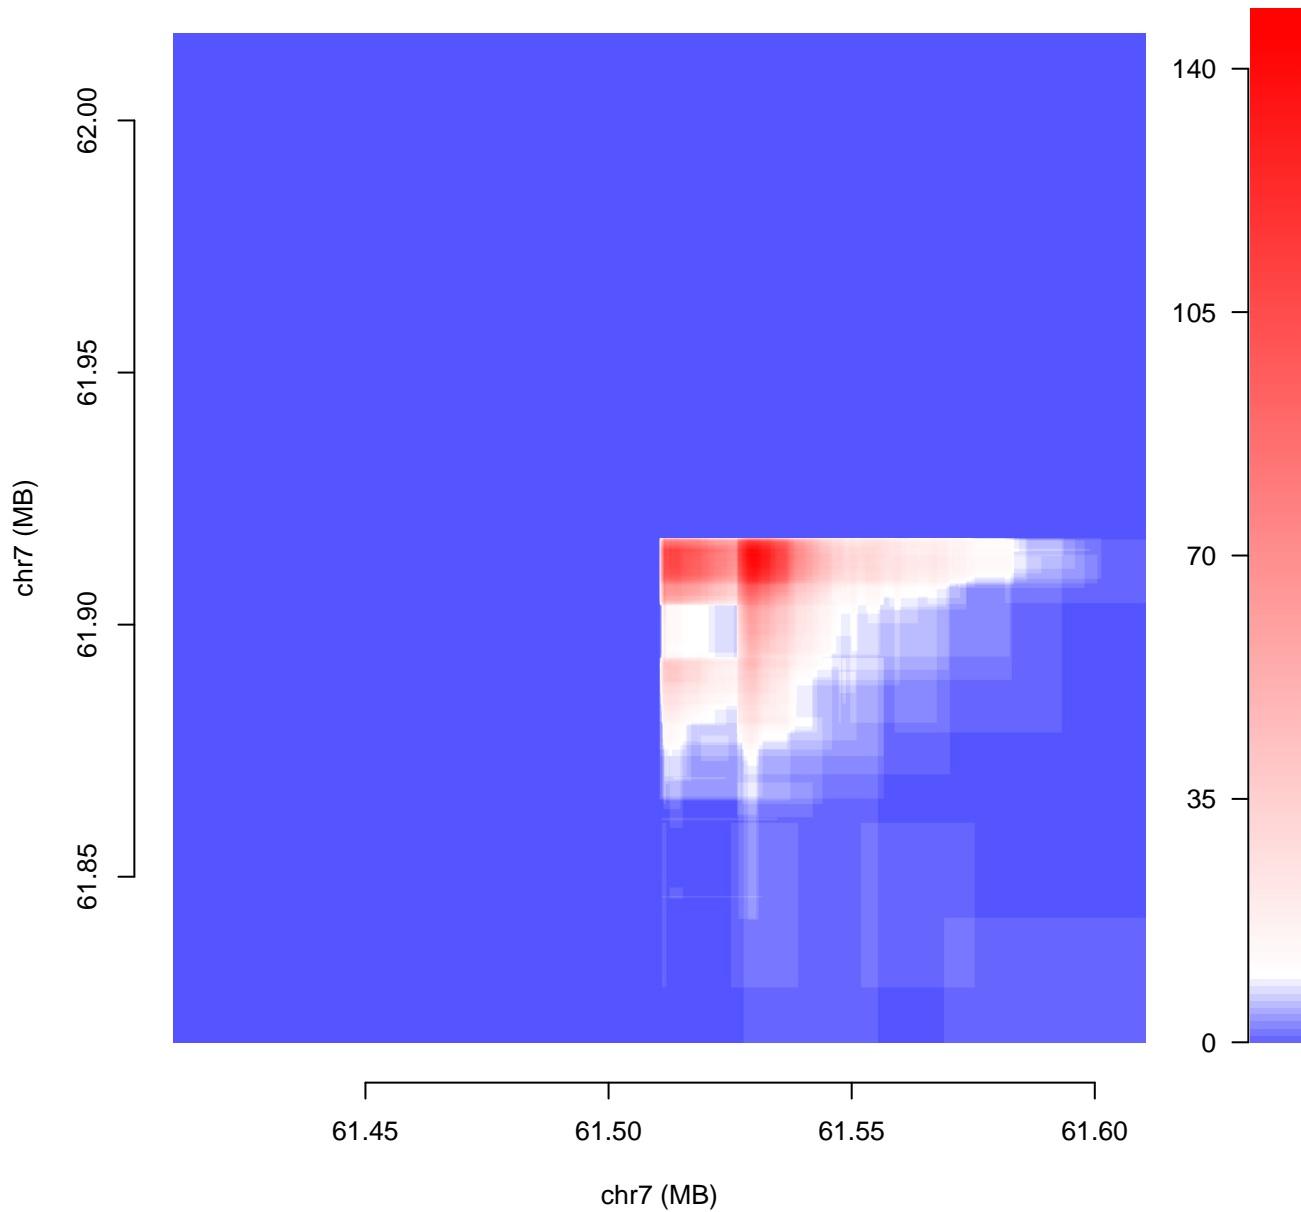

Supplement: Supplemental_Data.zip [file event_384.pdf › event_384.pdf]

Barcode

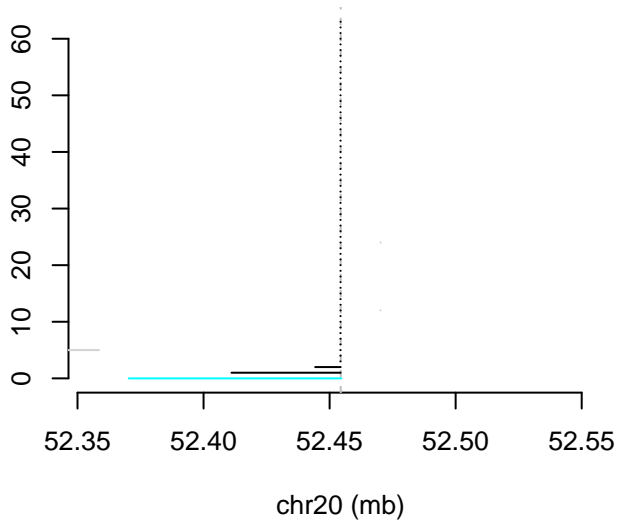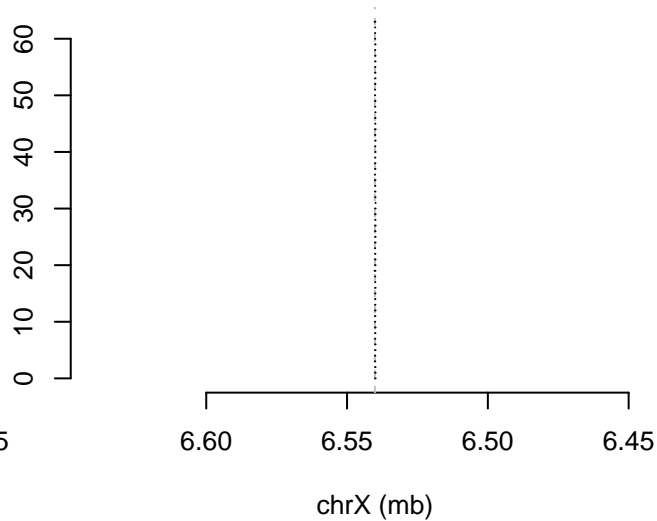

Copy number

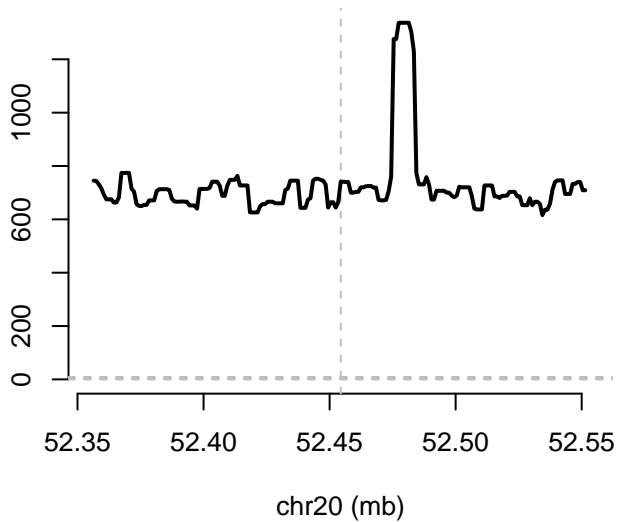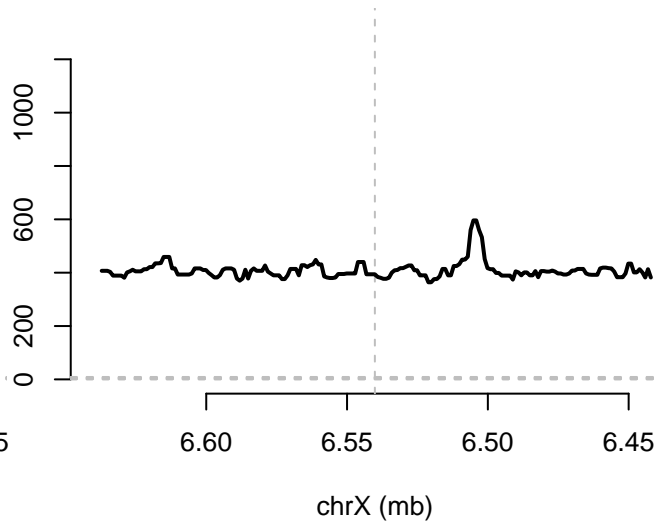

K562 chrX:6,540,124::chr20:52,454,420++

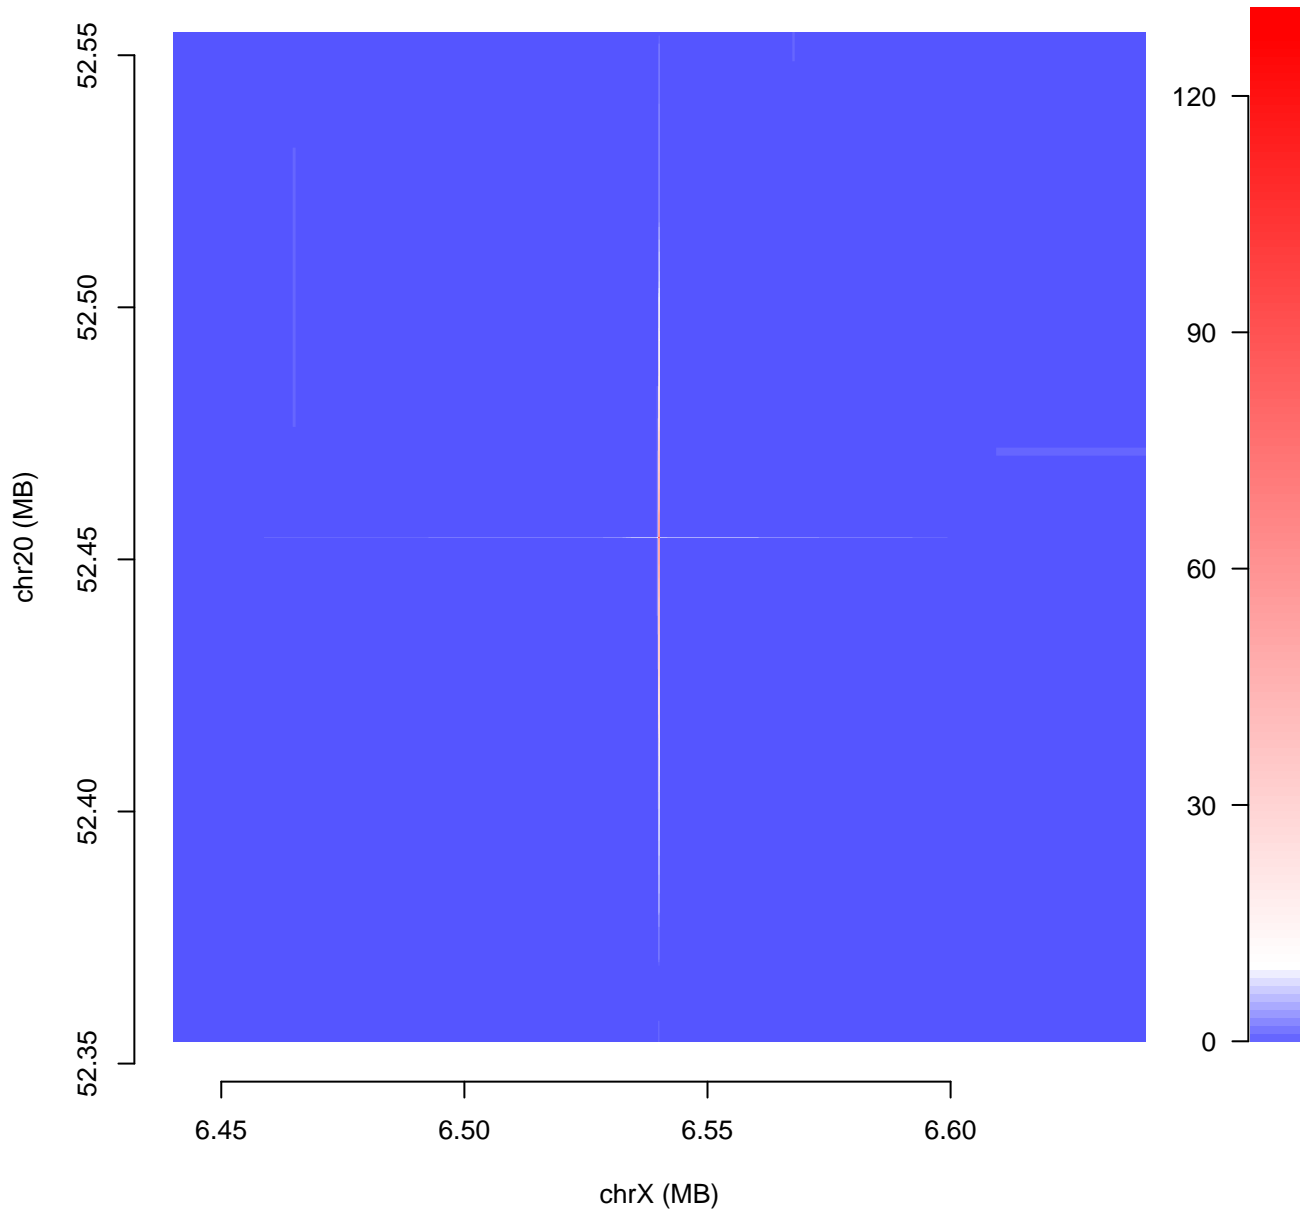

Supplement: Supplemental_Data.zip [file event_385.pdf › event_385.pdf]

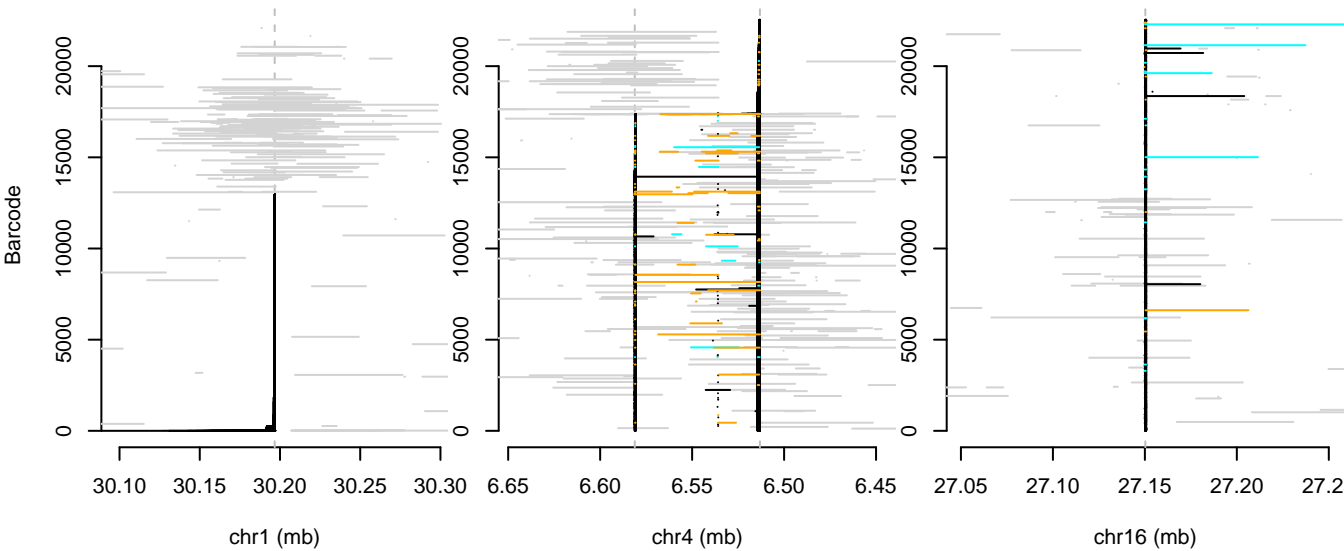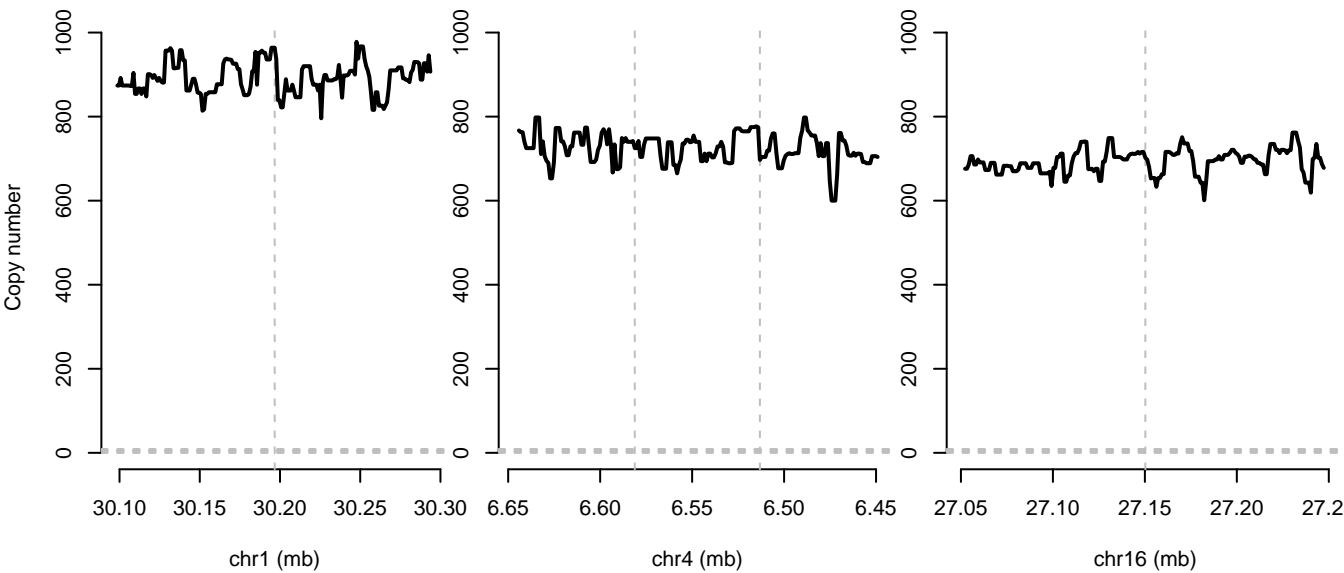

K562 chr4:6,513,142::chr16:27,150,259--

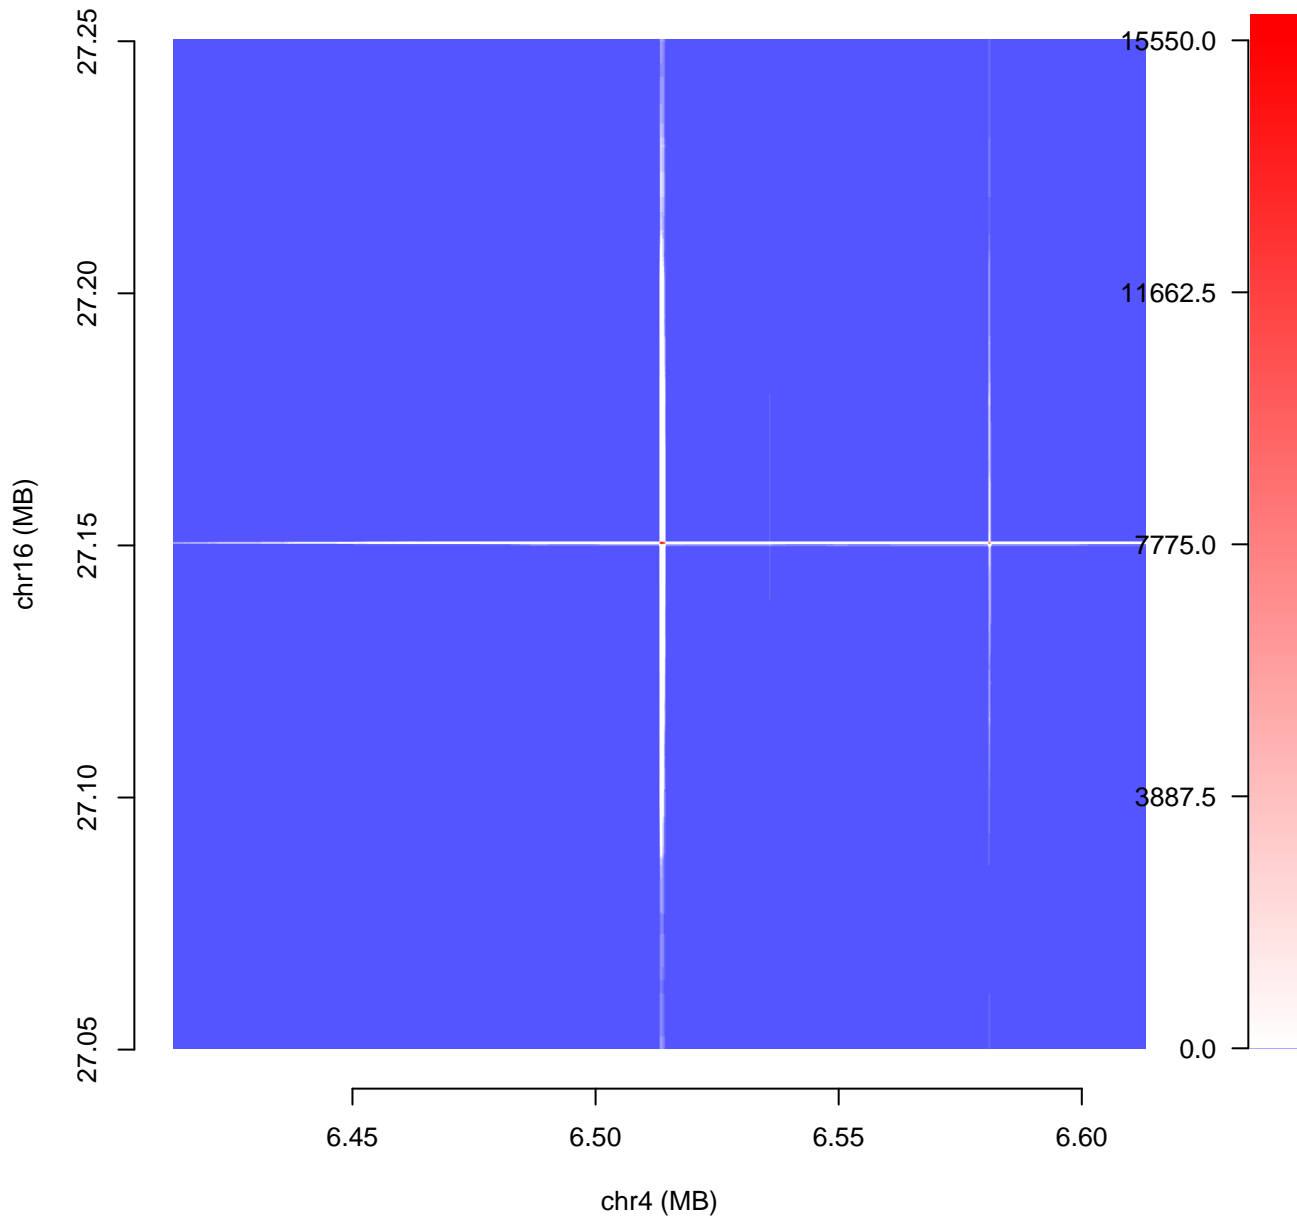

K562 chr4:6,513,142::chr4:6,581,185--+

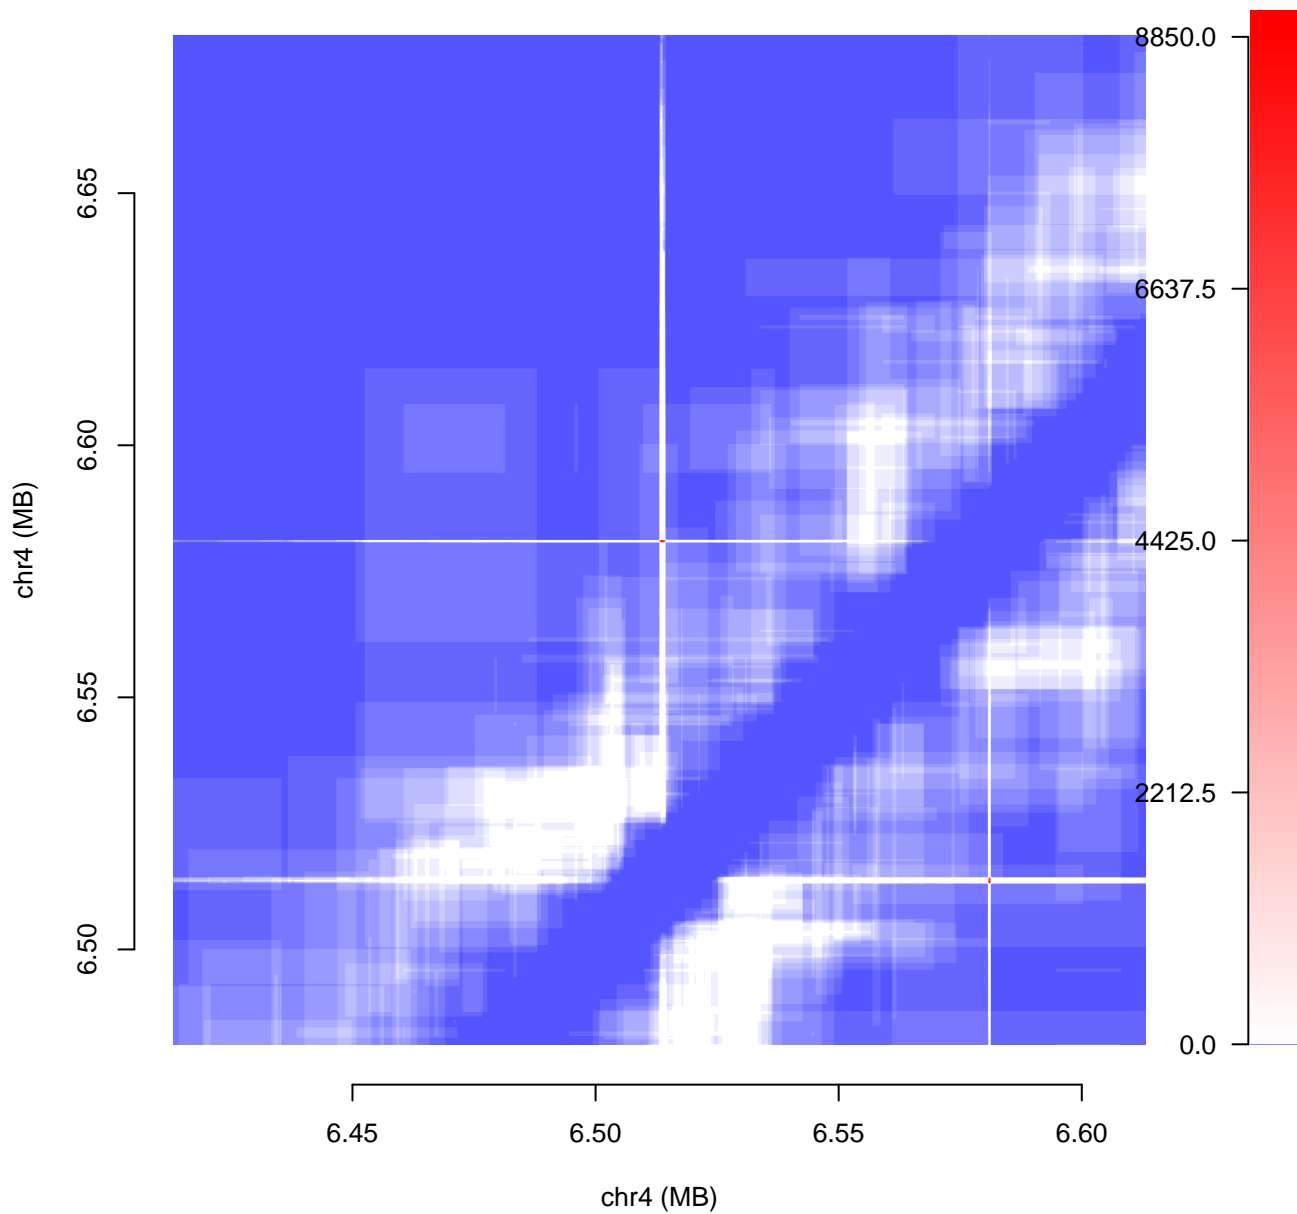

K562 chr4:6,581,185::chr1:30,196,698++

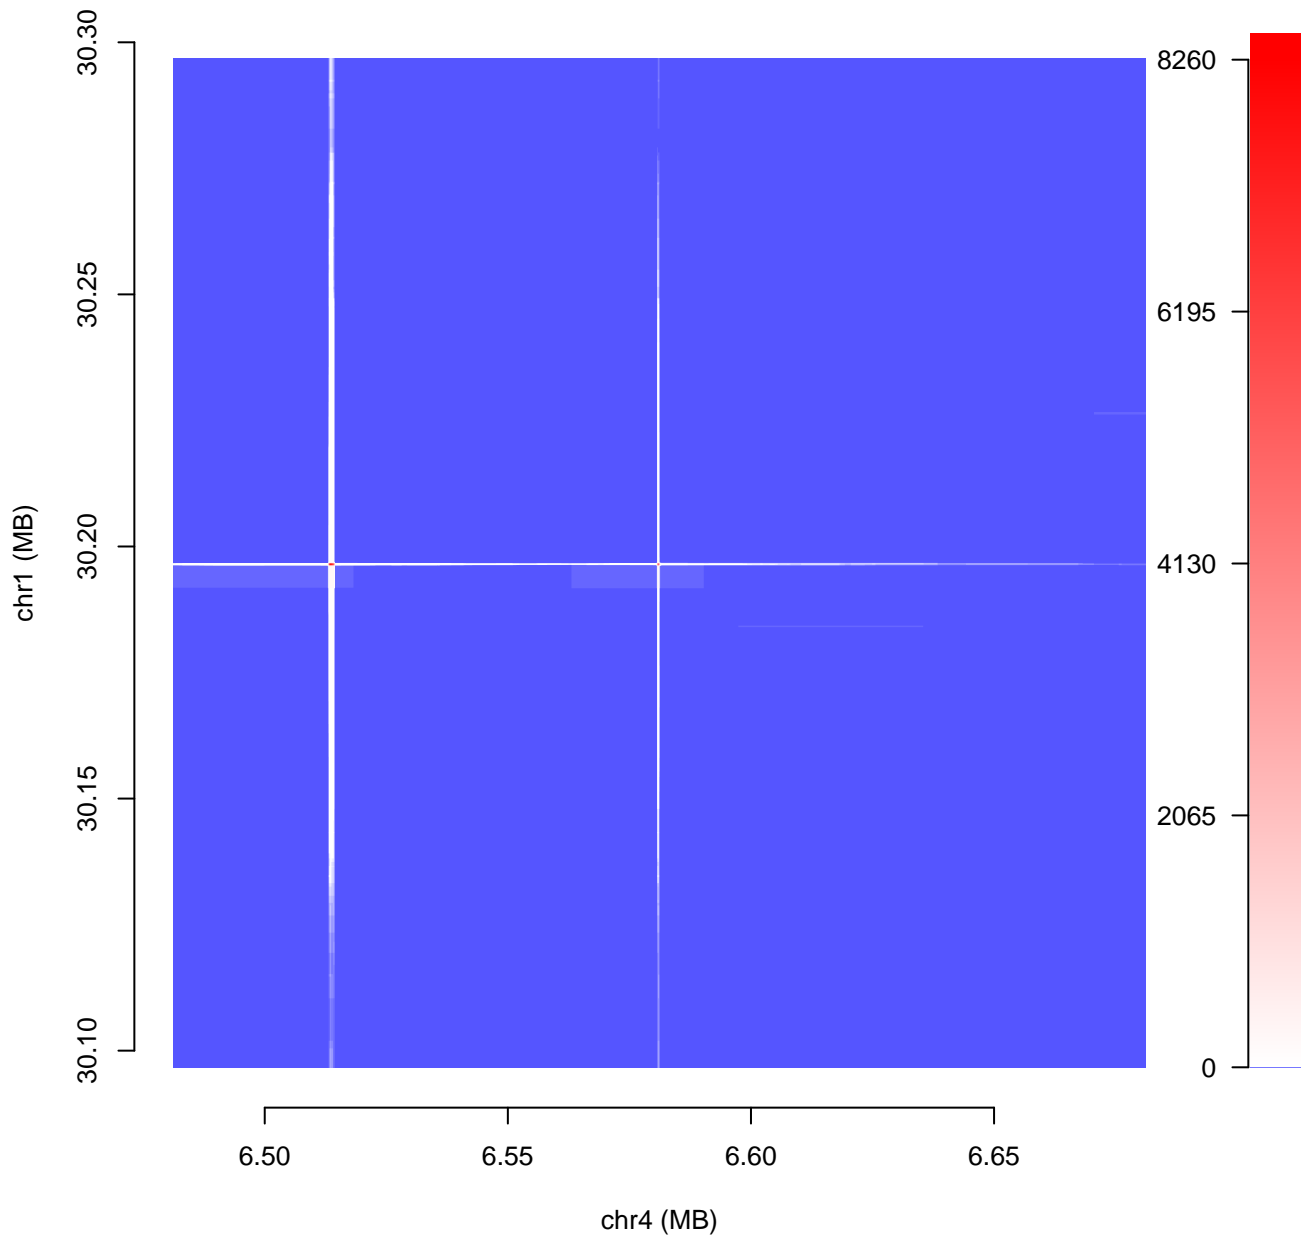

Supplement: Supplemental_Data.zip [file event_386.pdf › event_386.pdf]

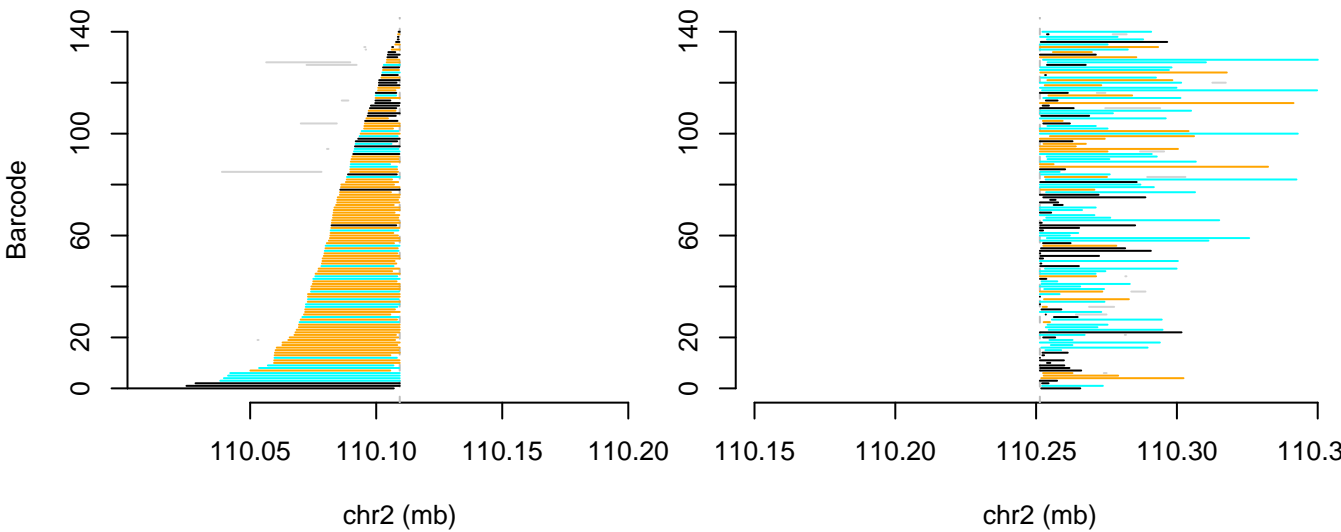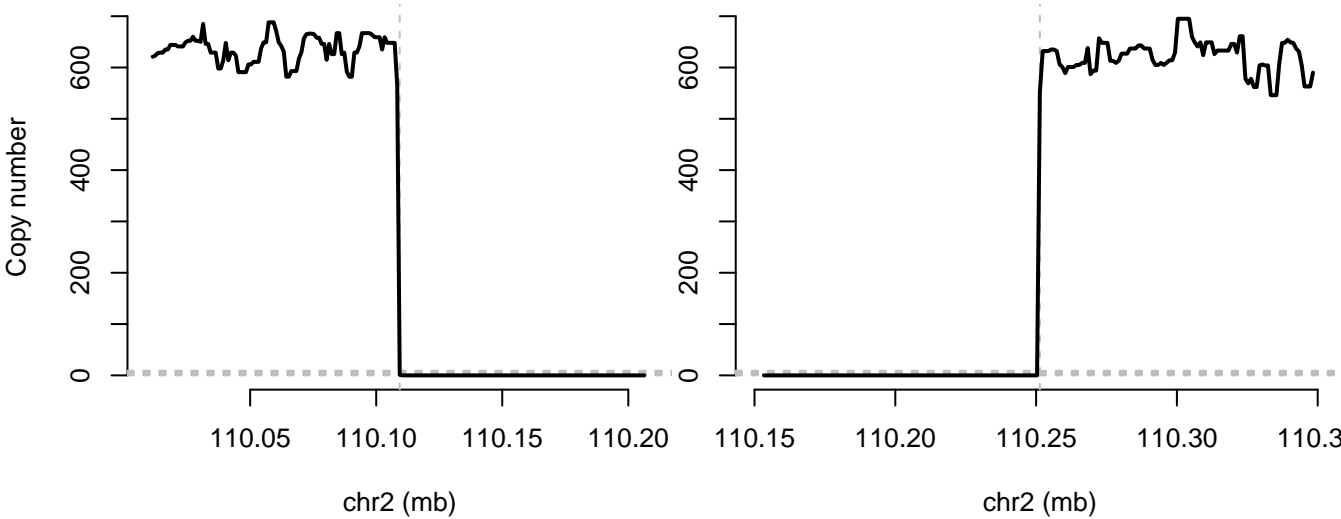

K562 chr2:110,109,337::chr2:110,251,335+-

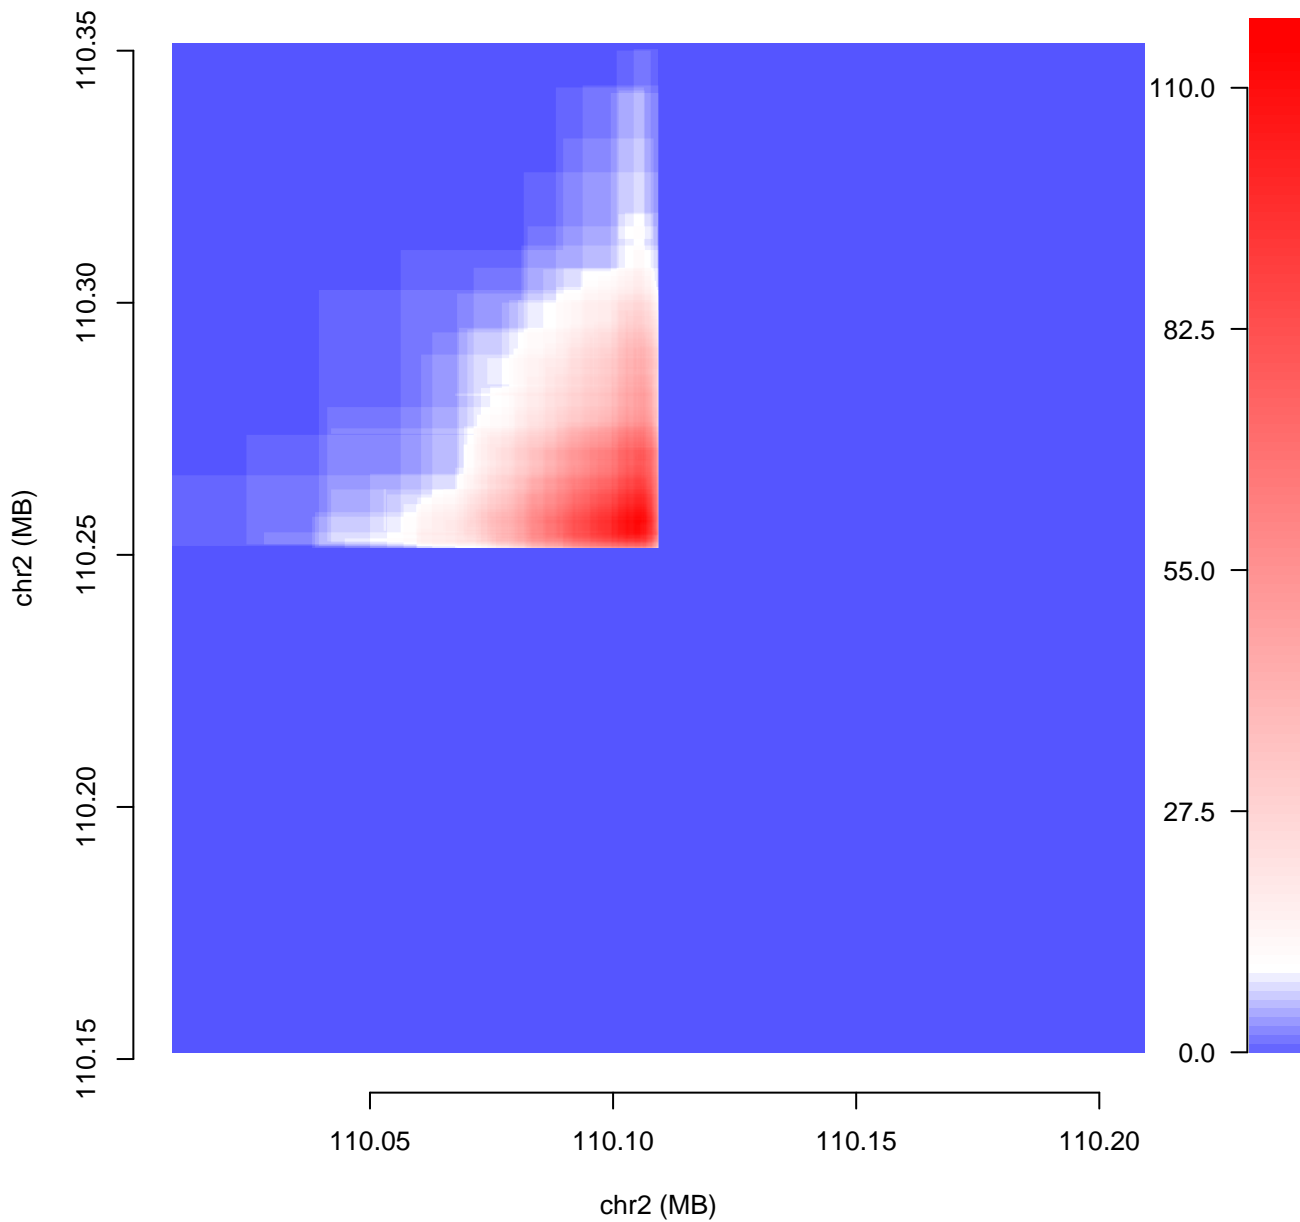

Supplement: Supplemental_Data.zip [file event_387.pdf › event_387.pdf]

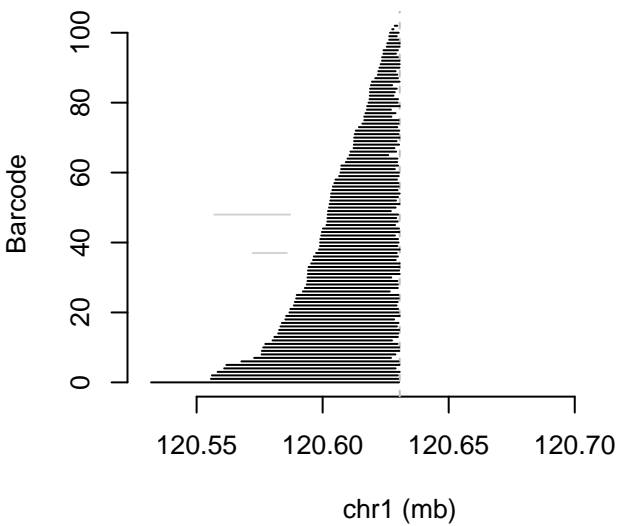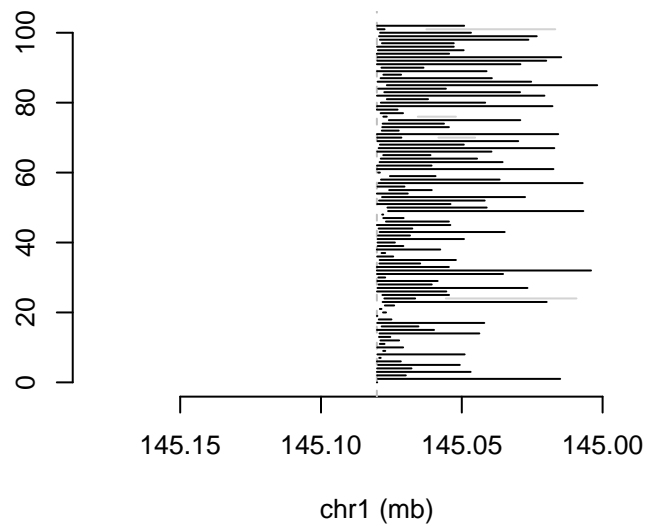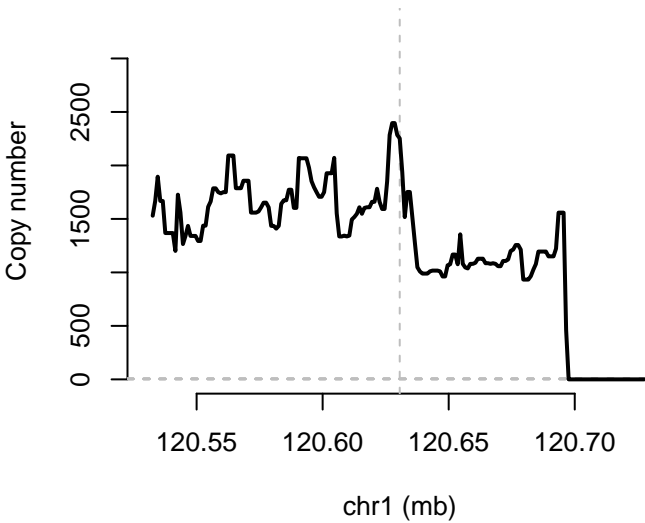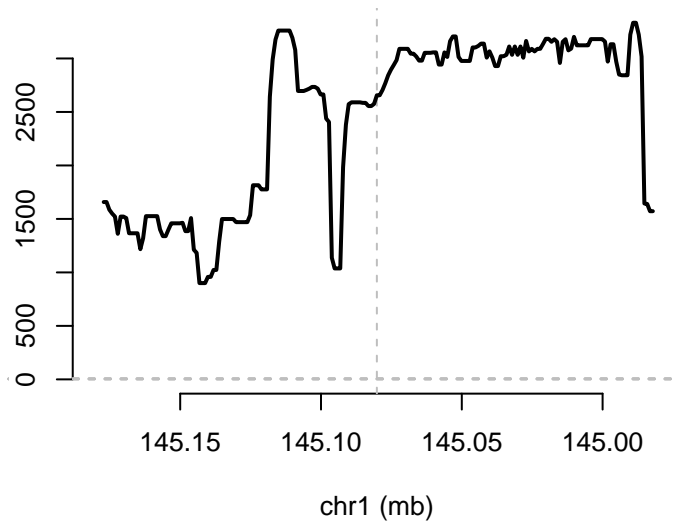

K562 chr1:120,630,583::chr1:145,080,162++

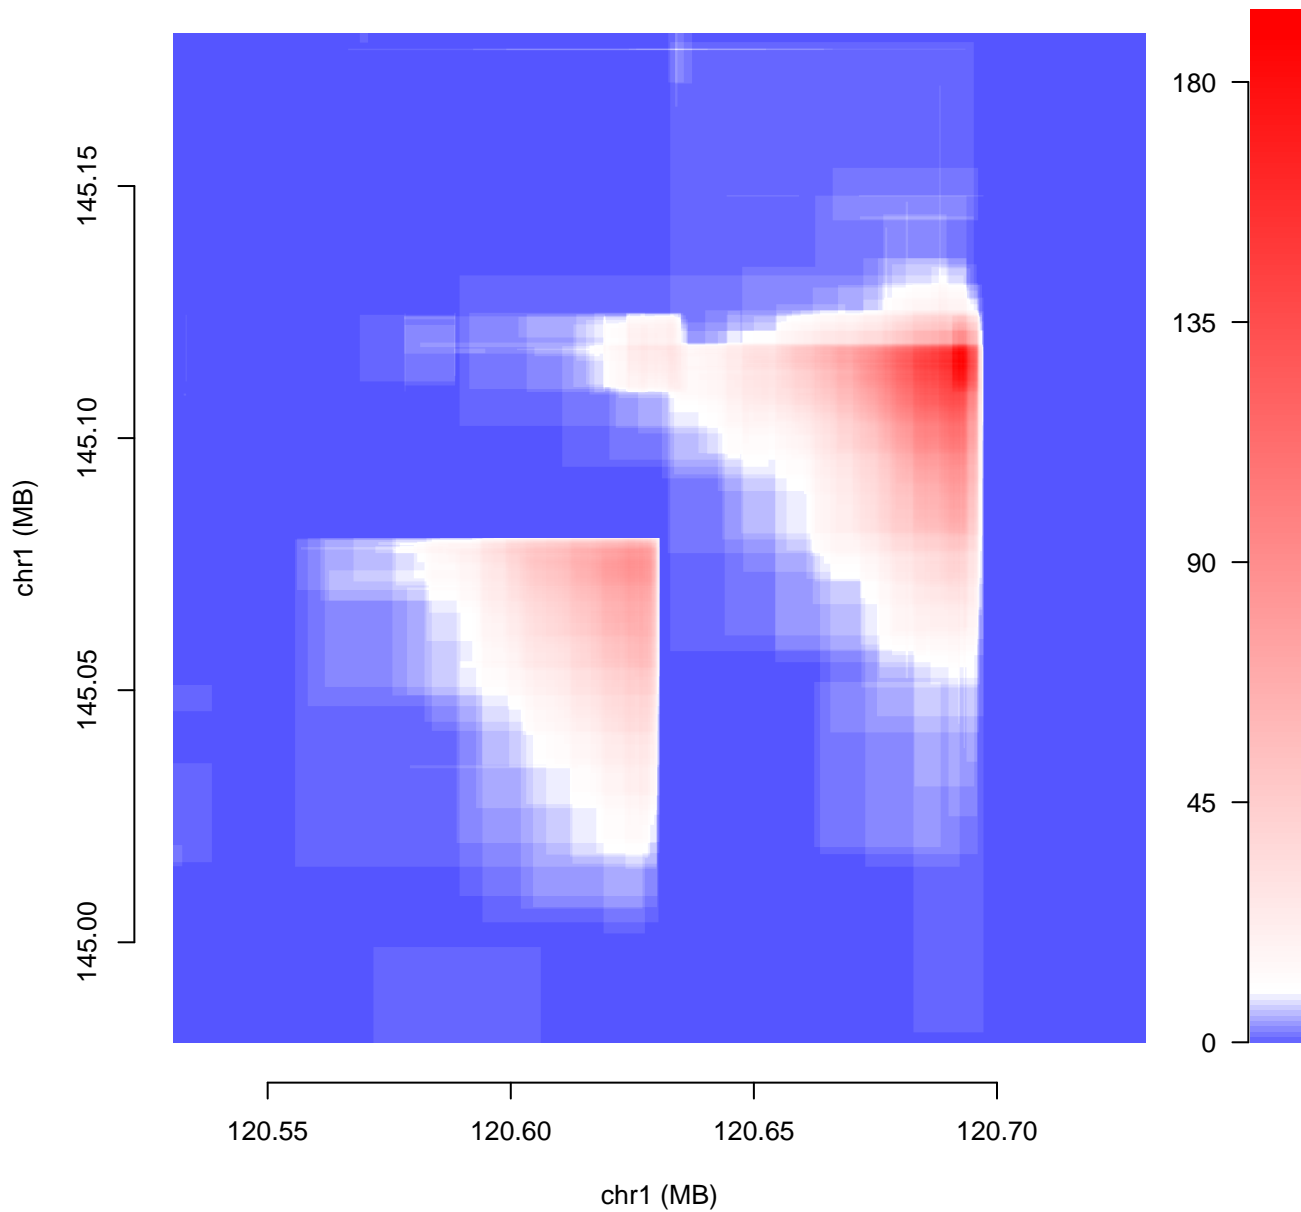

Supplement: Supplemental_Data.zip [file event_388.pdf › event_388.pdf]

Barcode

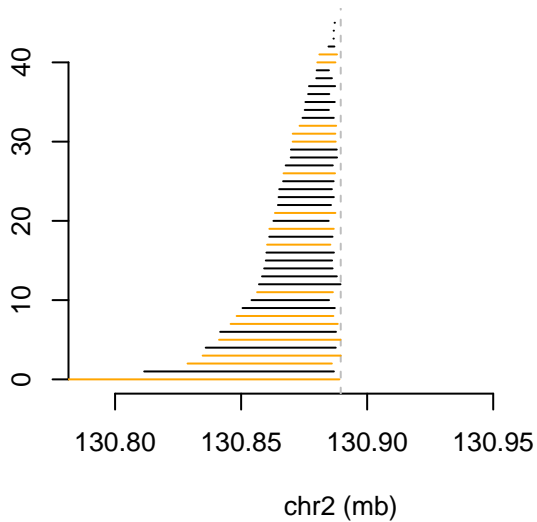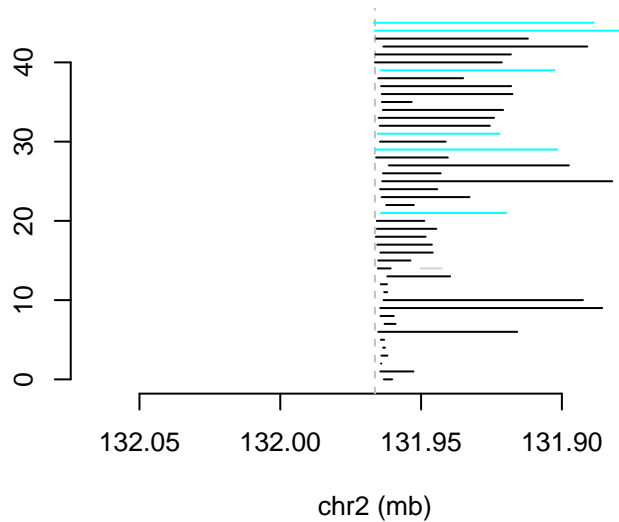

Copy number

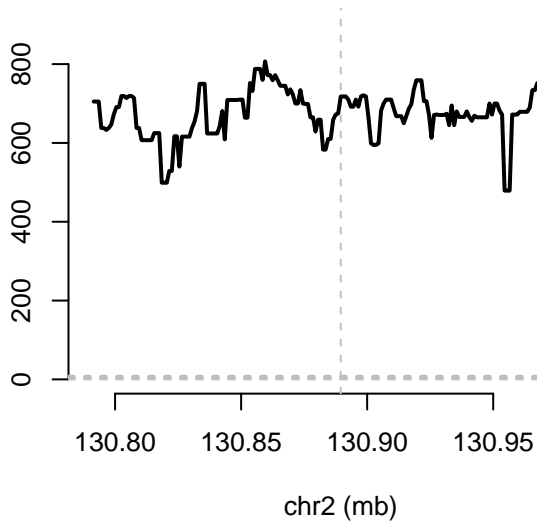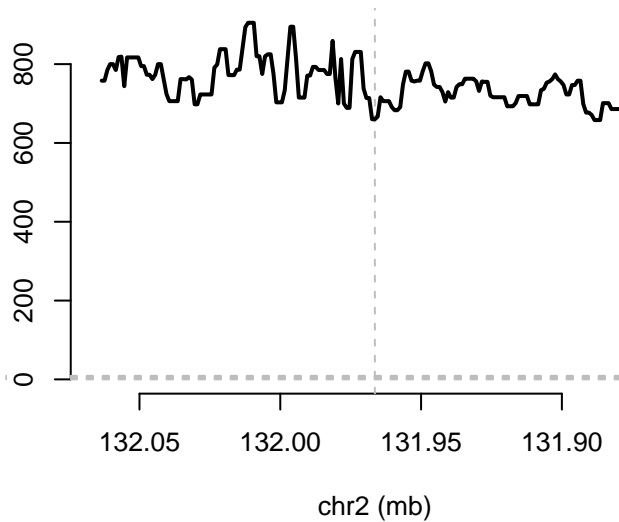

K562 chr2:131,966,410::chr2:130,889,519++

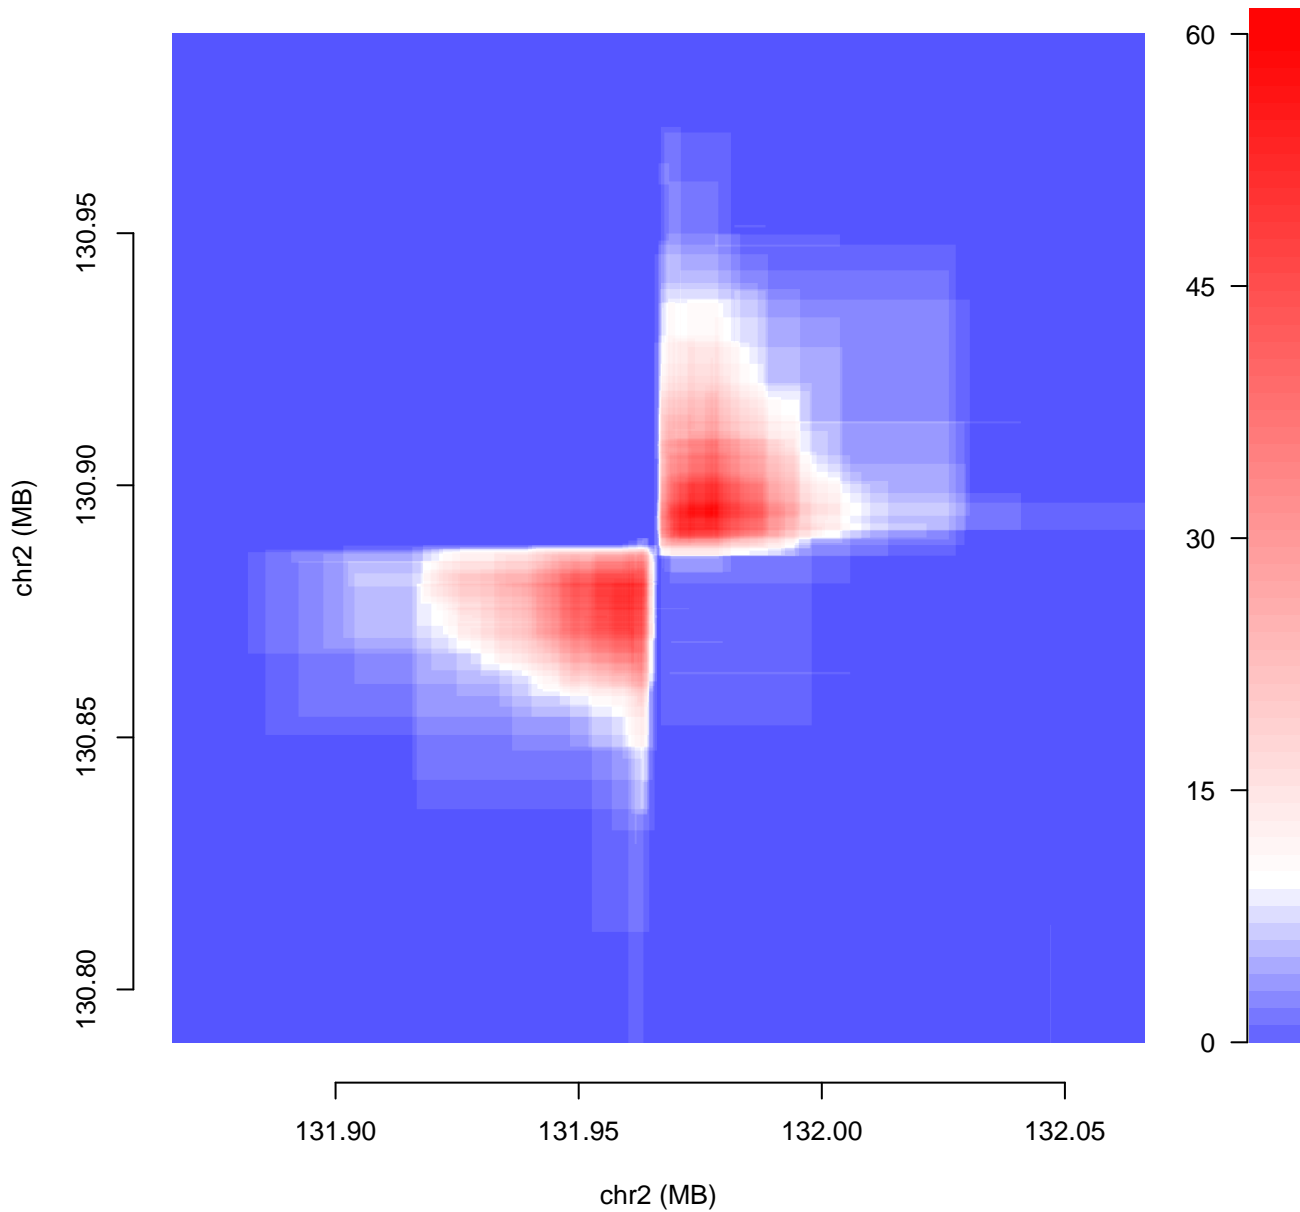

Supplement: Supplemental_Data.zip [file event_389.pdf › event_389.pdf]

Barcode

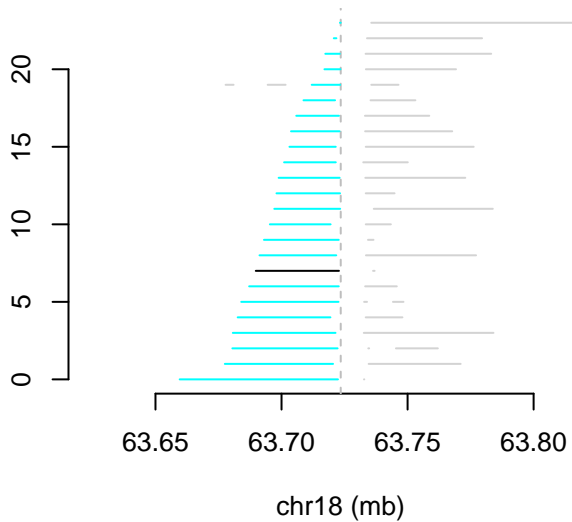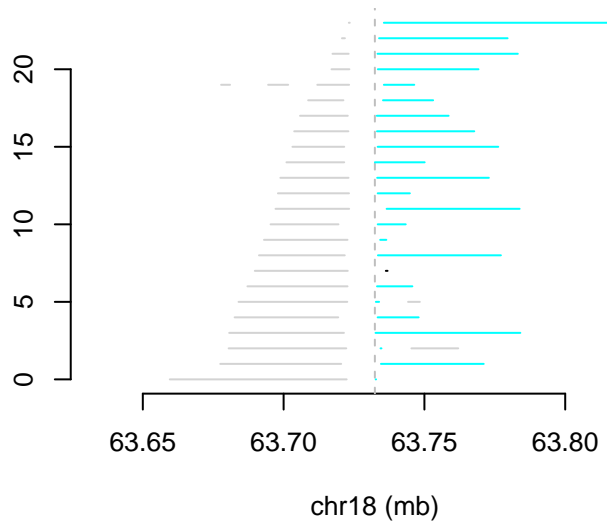

Copy number

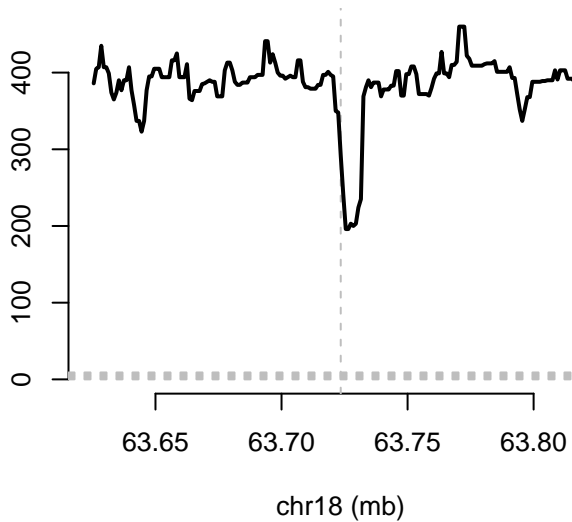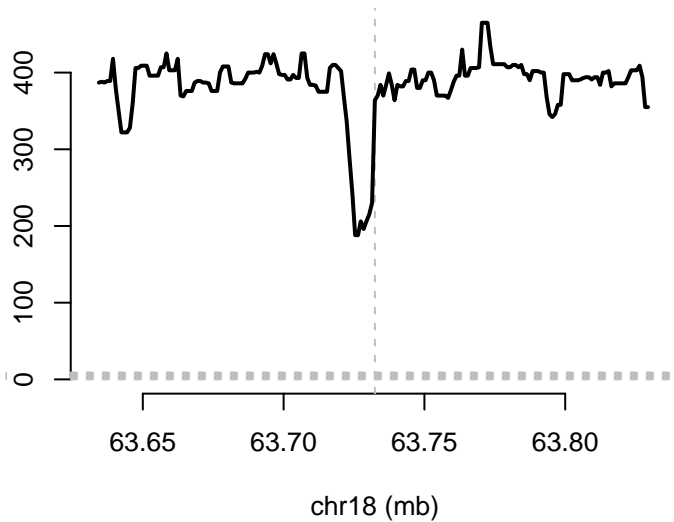

K562 chr18:63,723,489::chr18:63,732,409+-

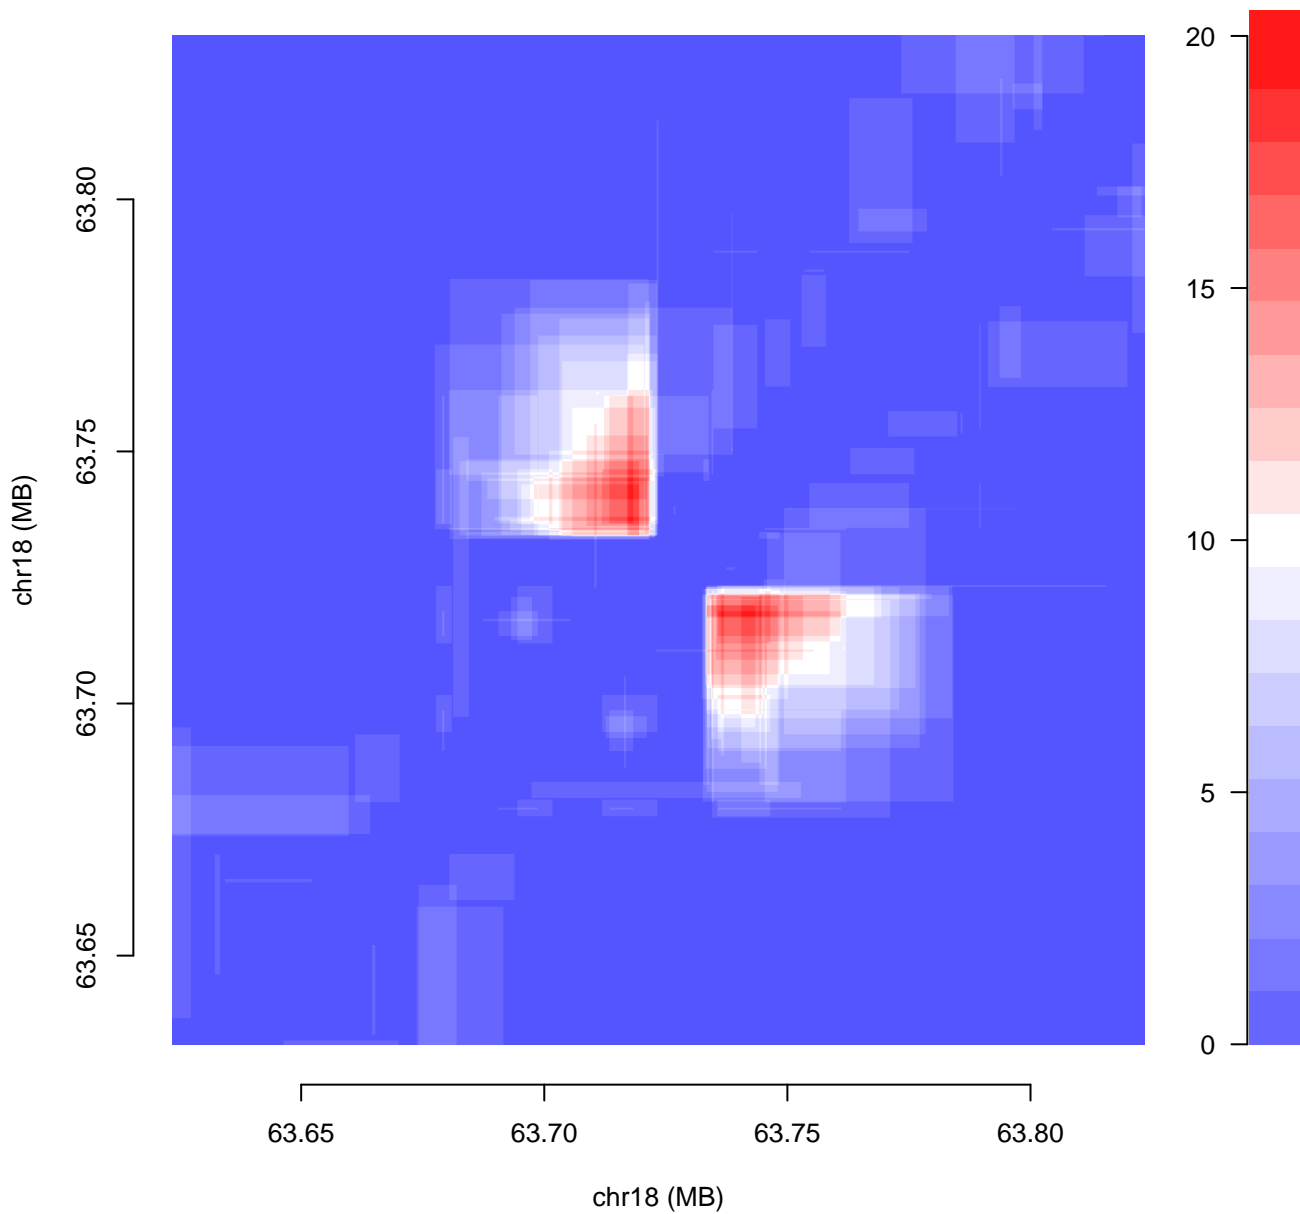

Supplement: Supplemental_Data.zip [file event_39.pdf › event_39.pdf]

Barcode

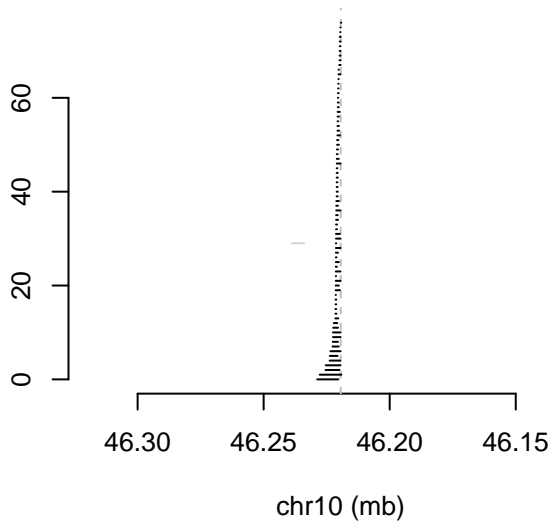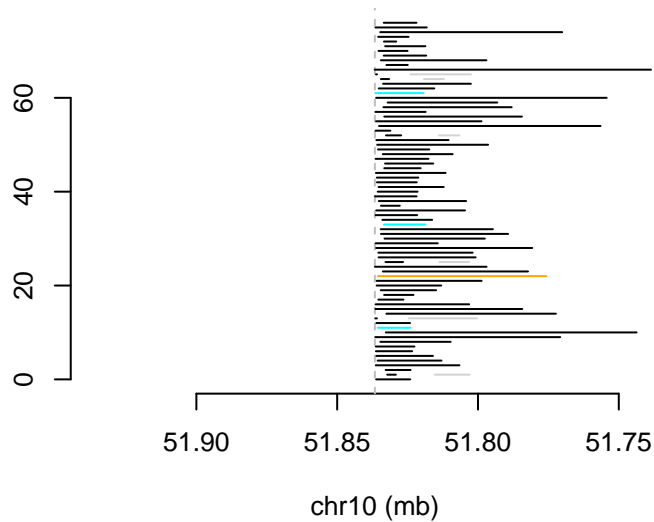

Copy number

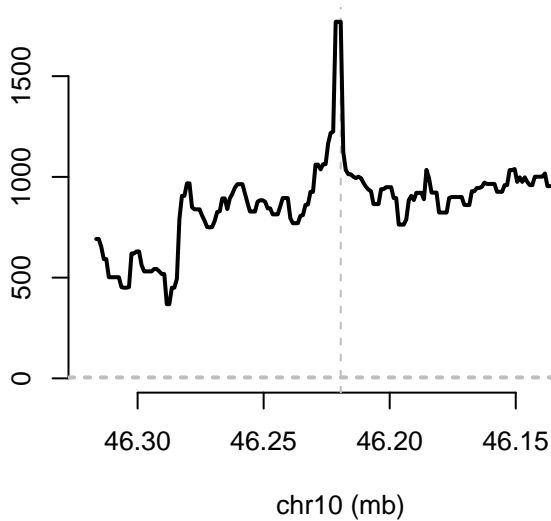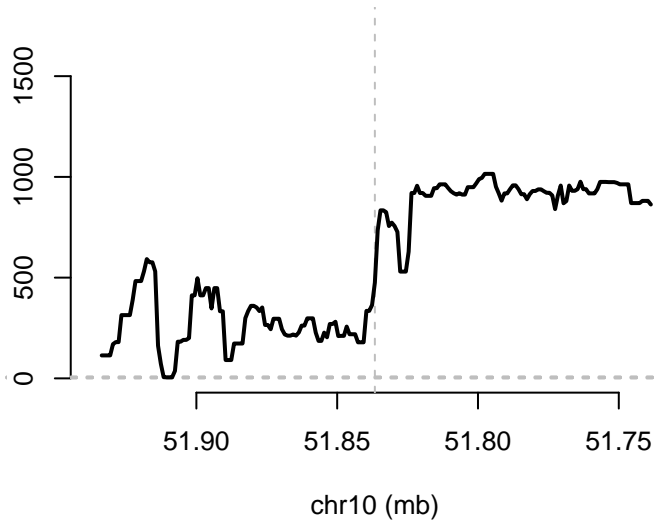

K562 chr10:51,836,622::chr10:46,219,416+-

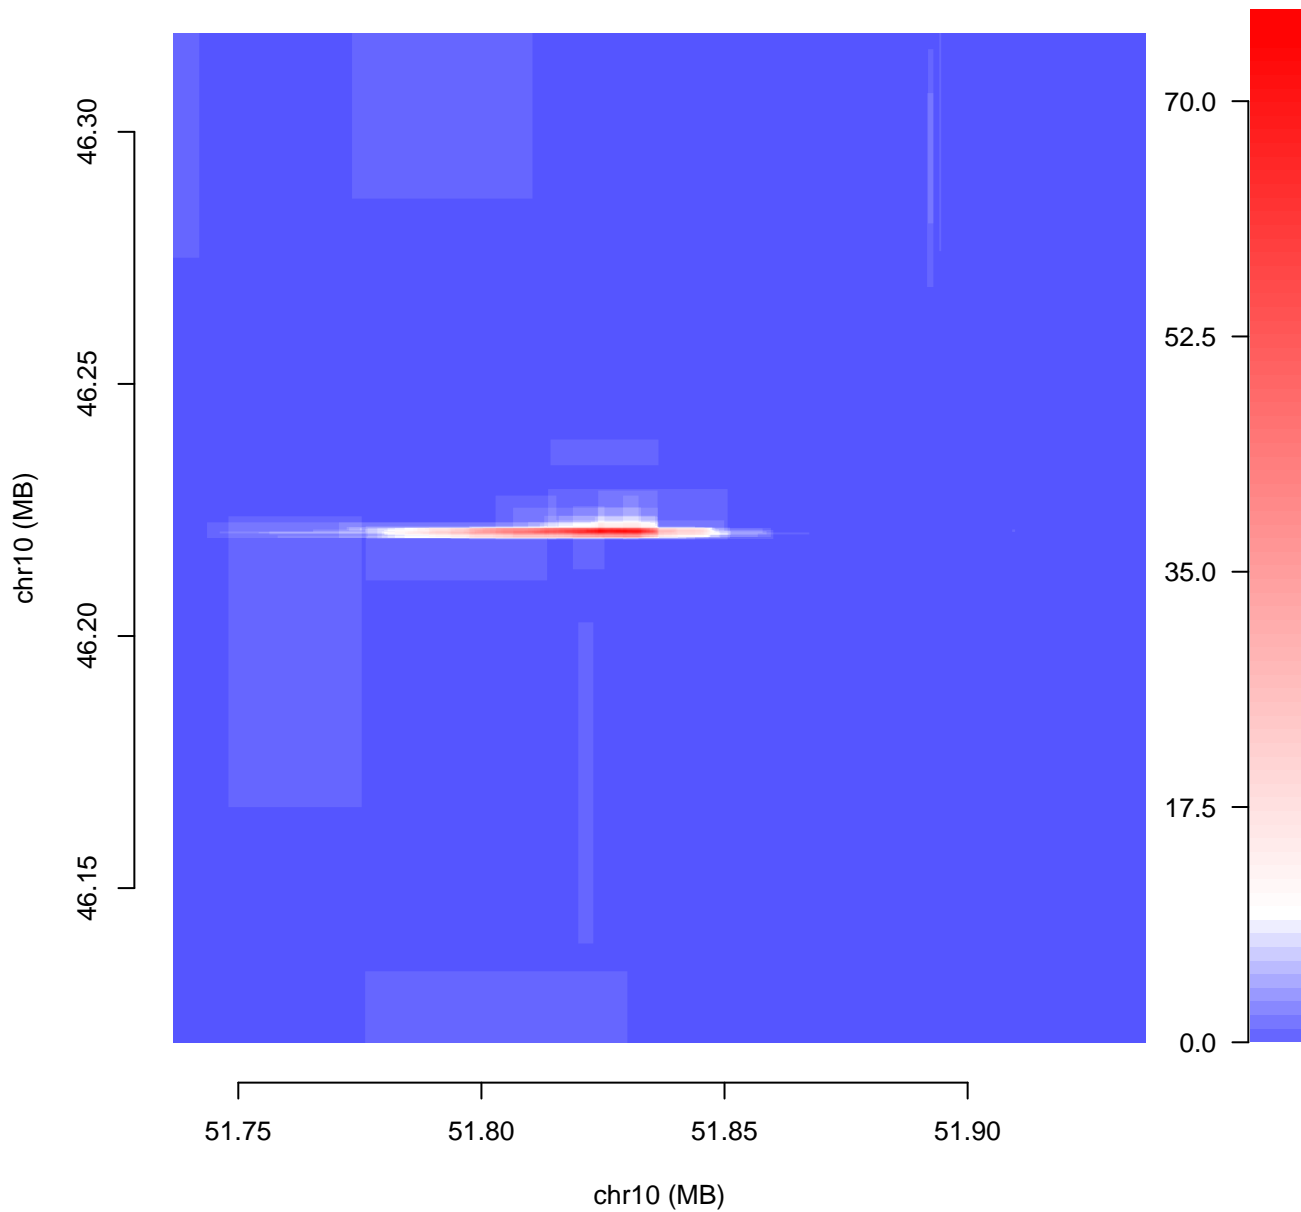

Supplement: Supplemental_Data.zip [file event_390.pdf › event_390.pdf]

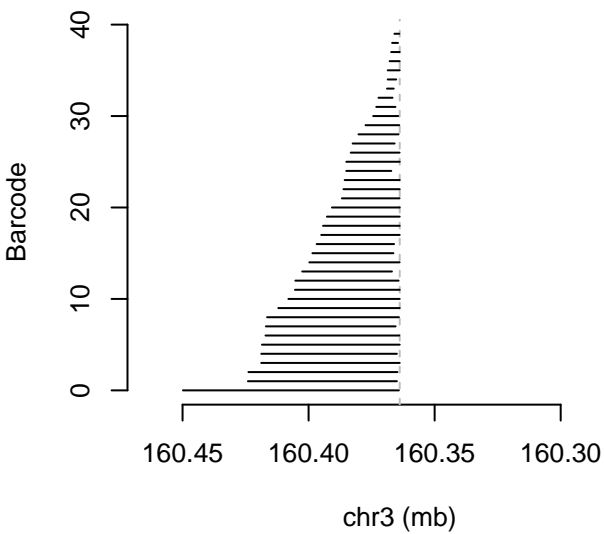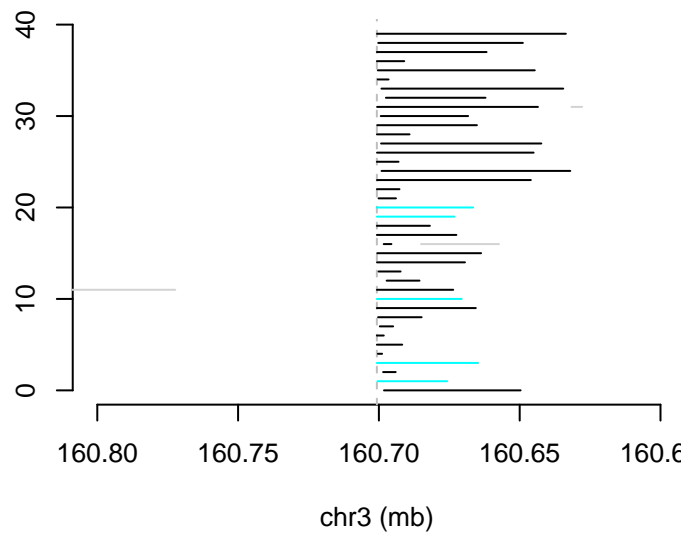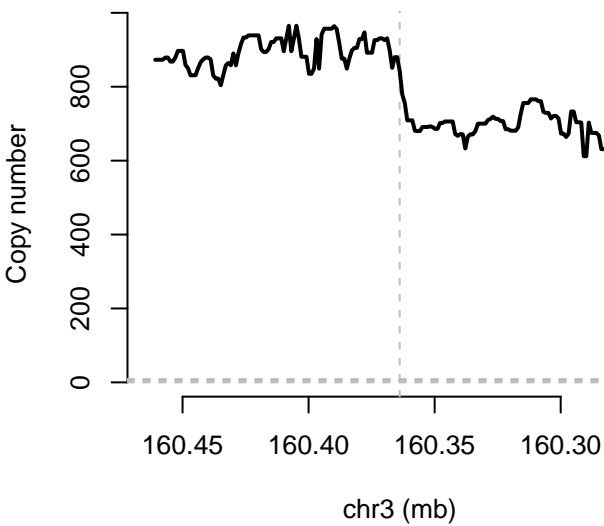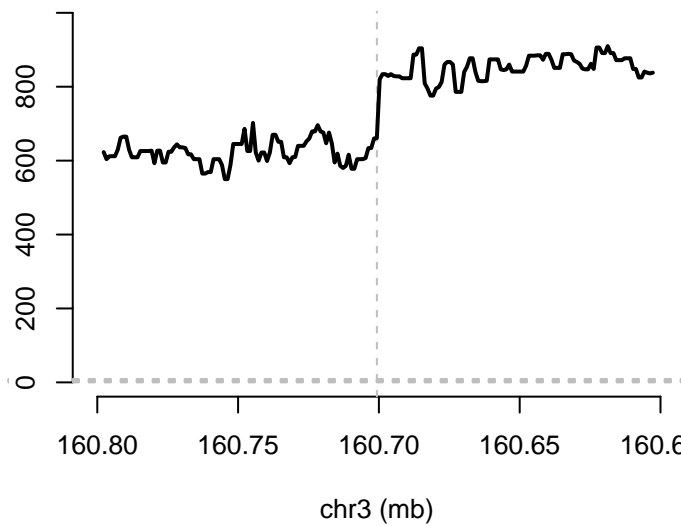

K562 chr3:160,363,843::chr3:160,700,716-+

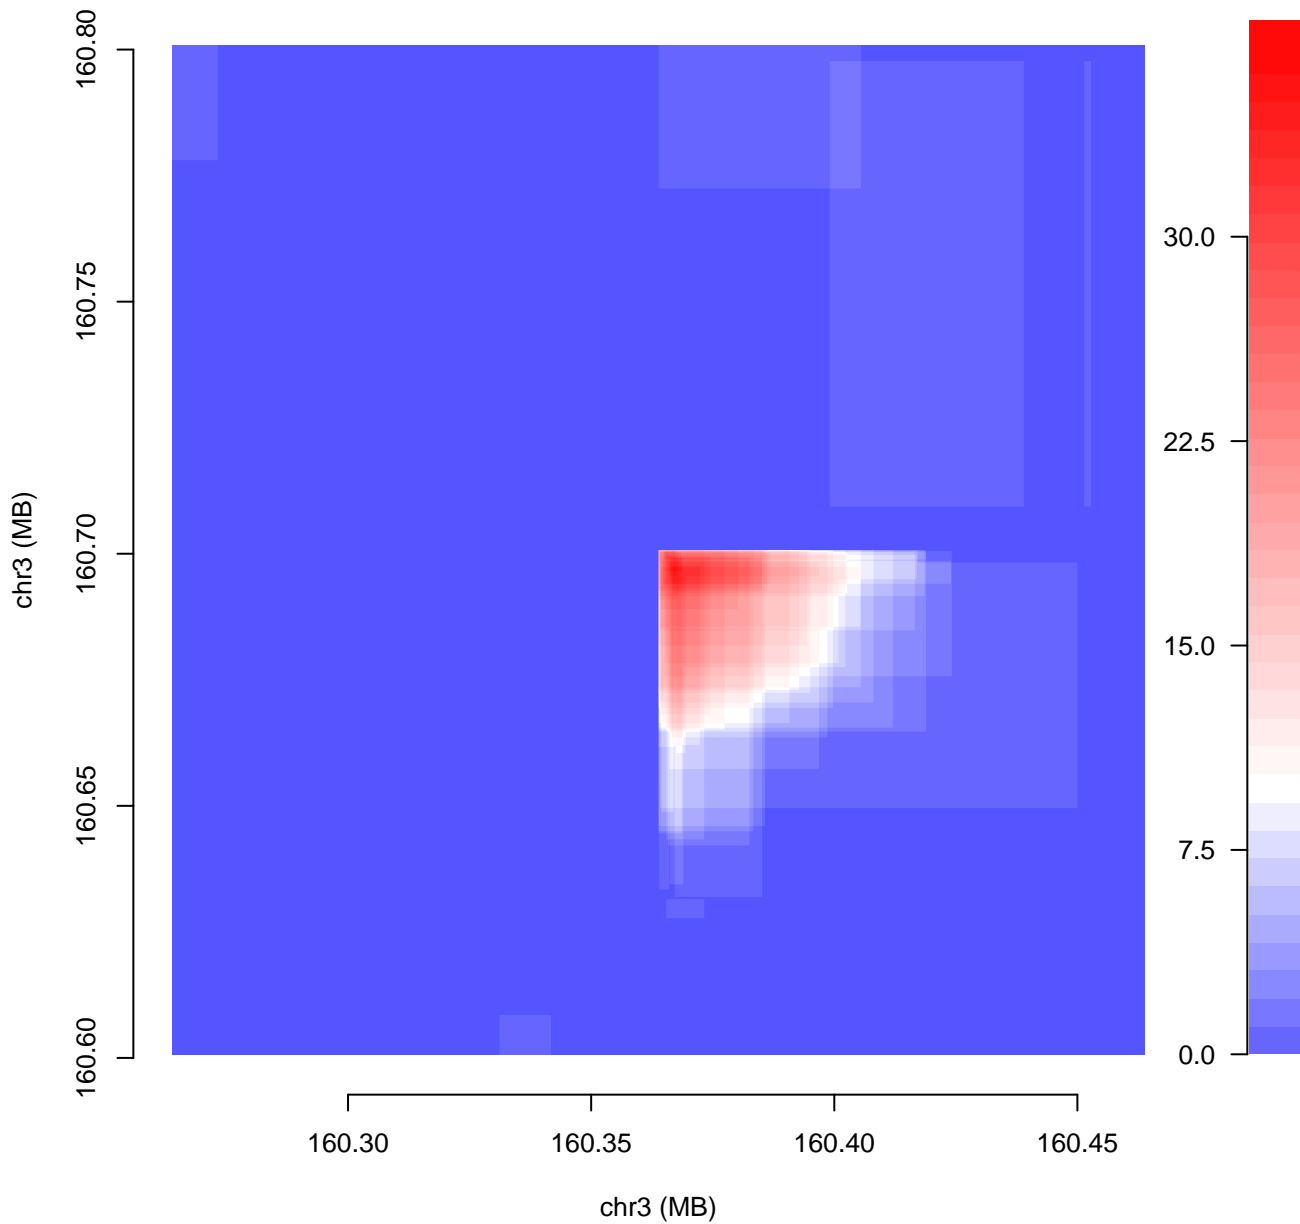

Supplement: Supplemental_Data.zip [file event_391.pdf › event_391.pdf]

Barcode

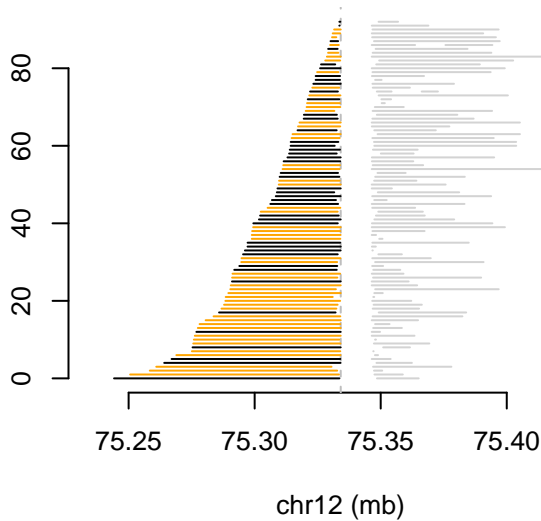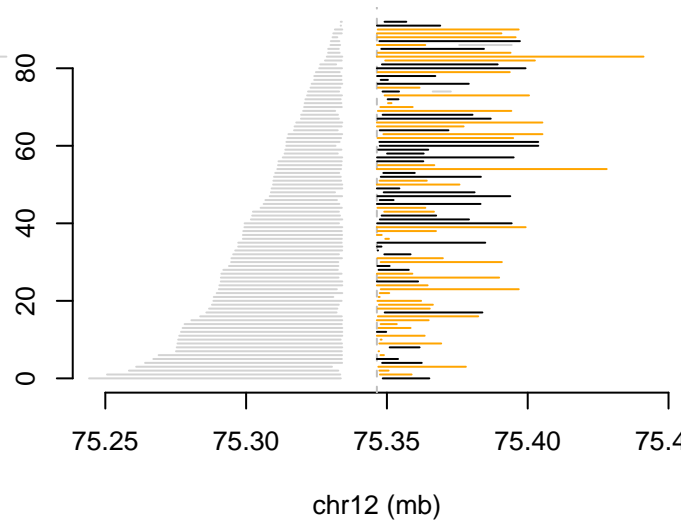

Copy number

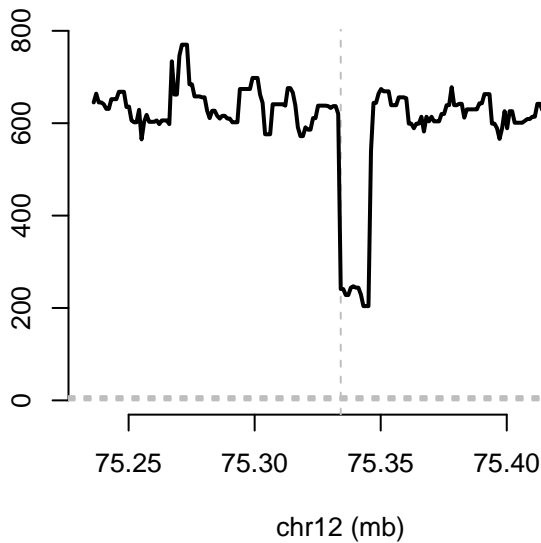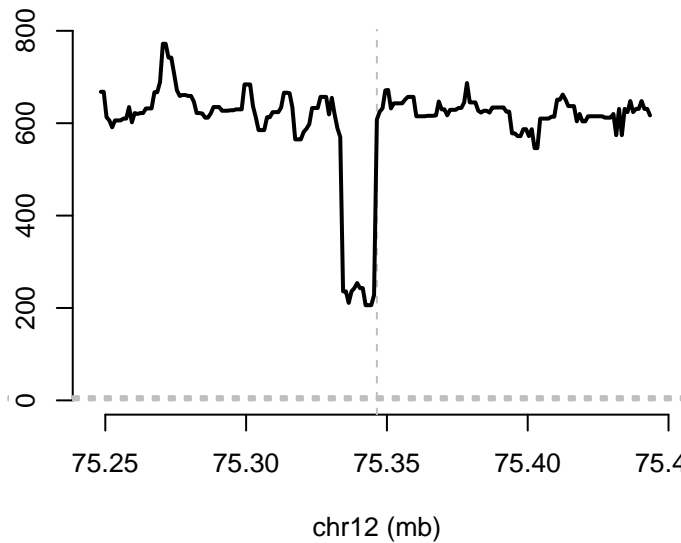

K562 chr12:75,346,432::chr12:75,334,147-+

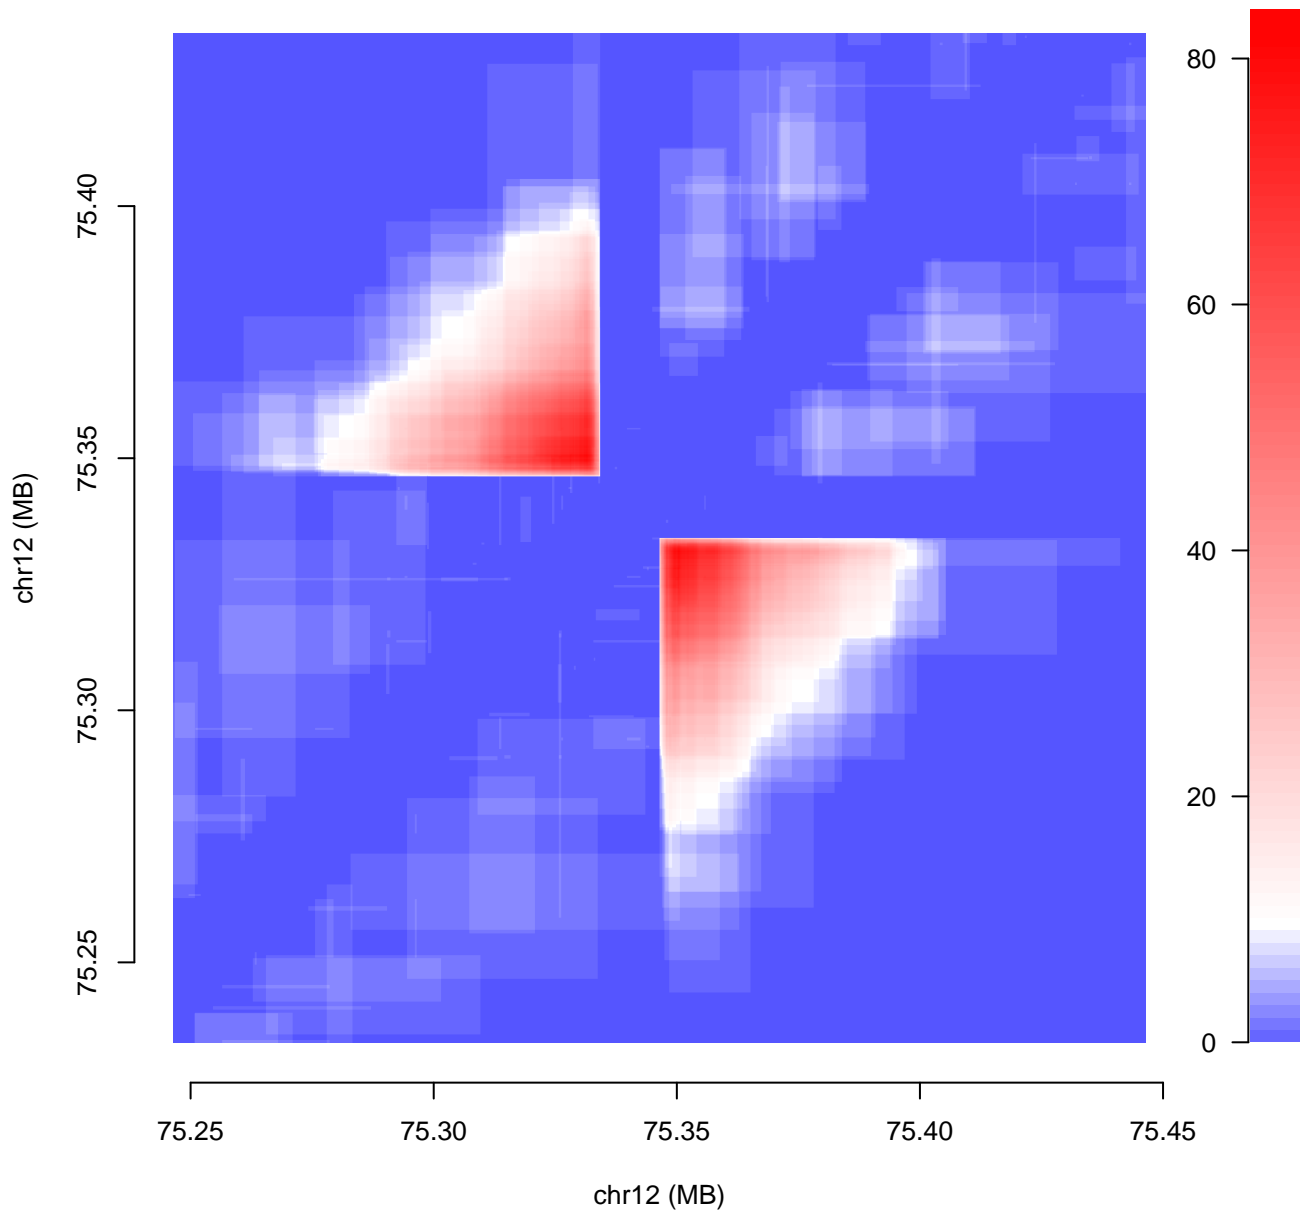

Supplement: Supplemental_Data.zip [file event_392.pdf › event_392.pdf]

Barcode

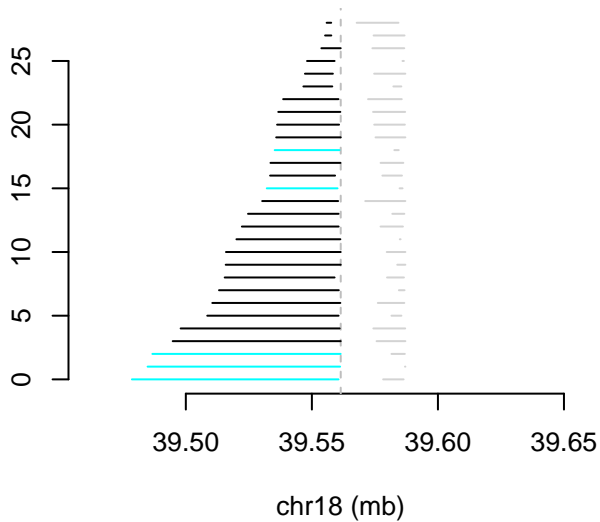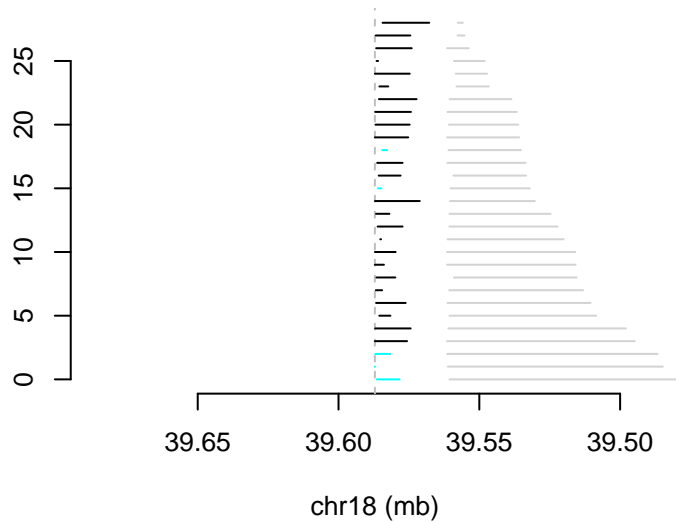

Copy number

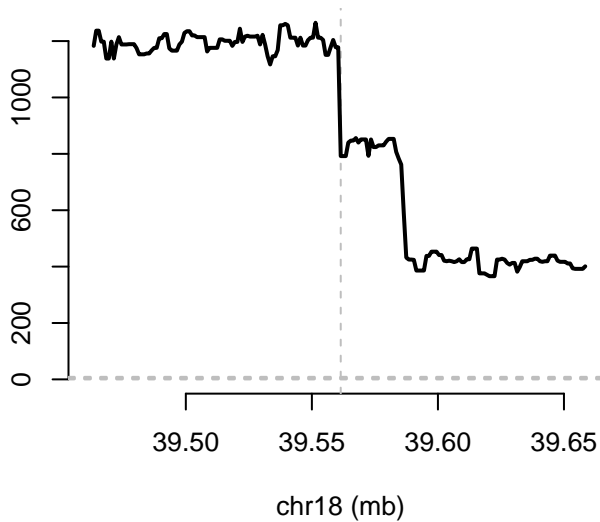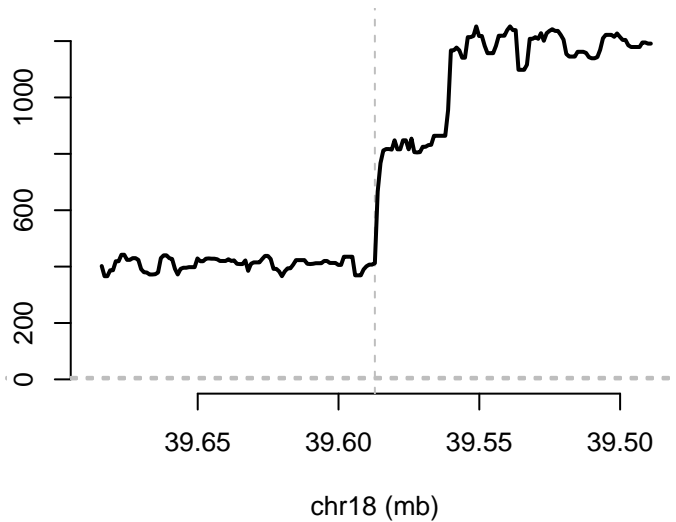

K562 chr18:39,587,090::chr18:39,561,449++

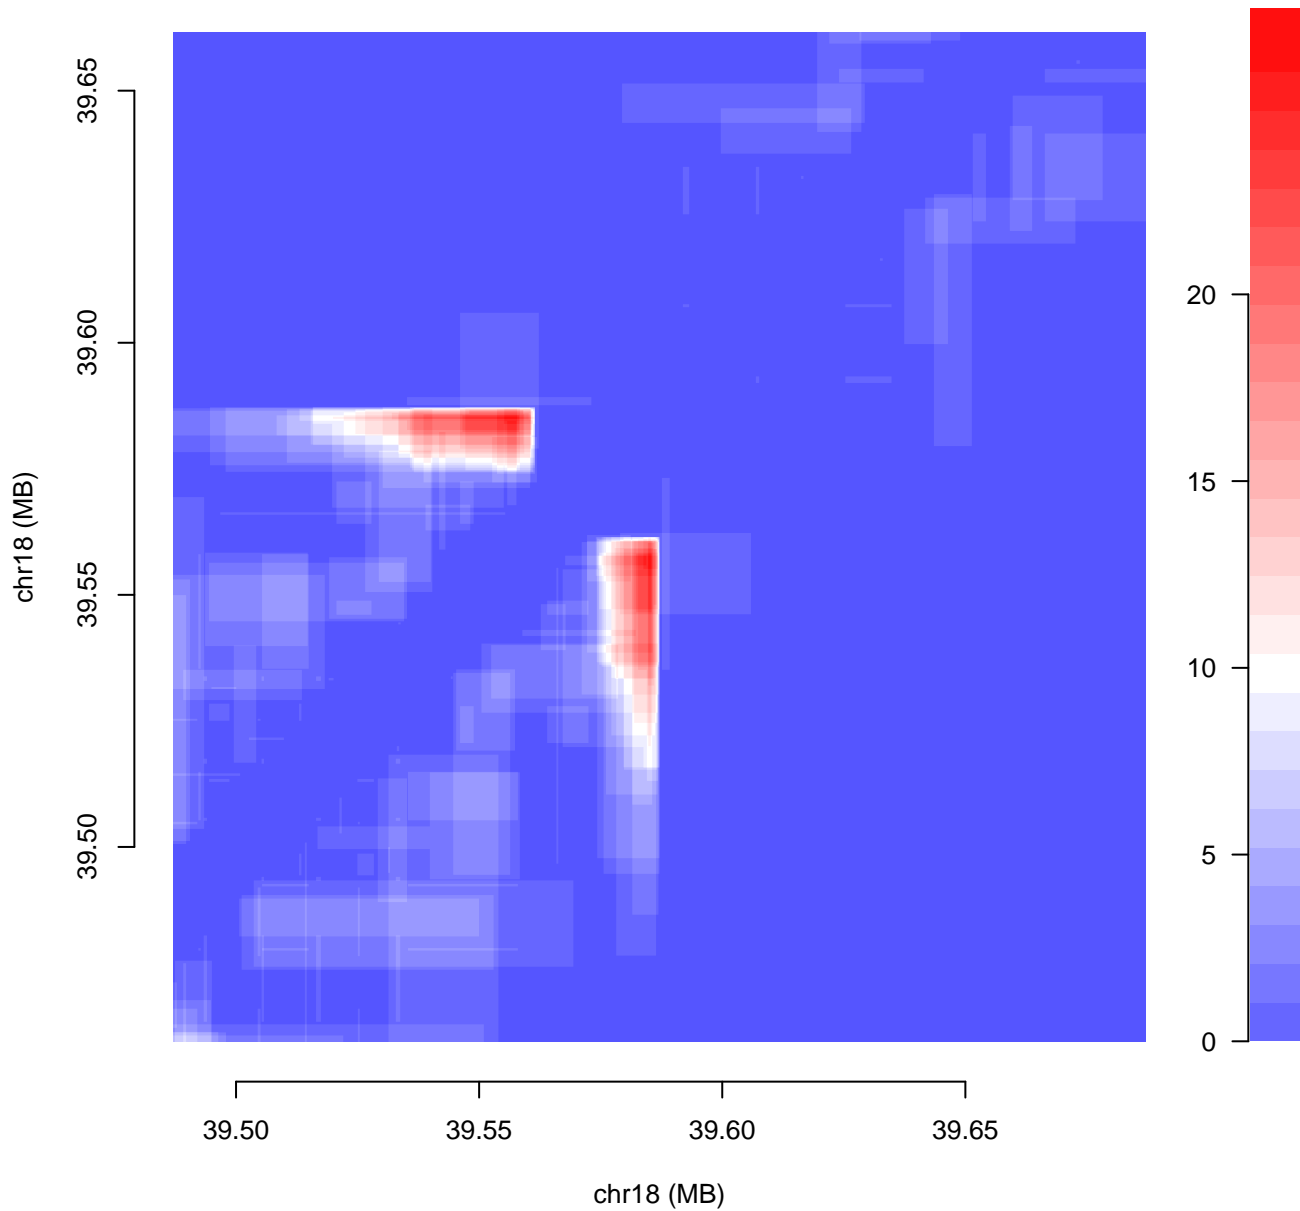

Supplement: Supplemental_Data.zip [file event_393.pdf › event_393.pdf]

Barcode

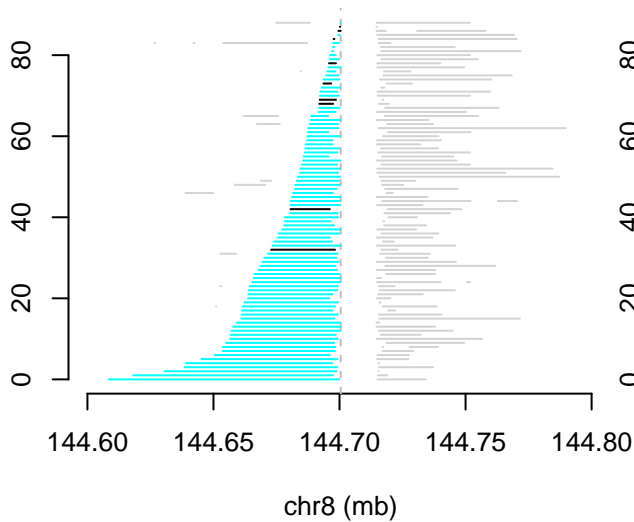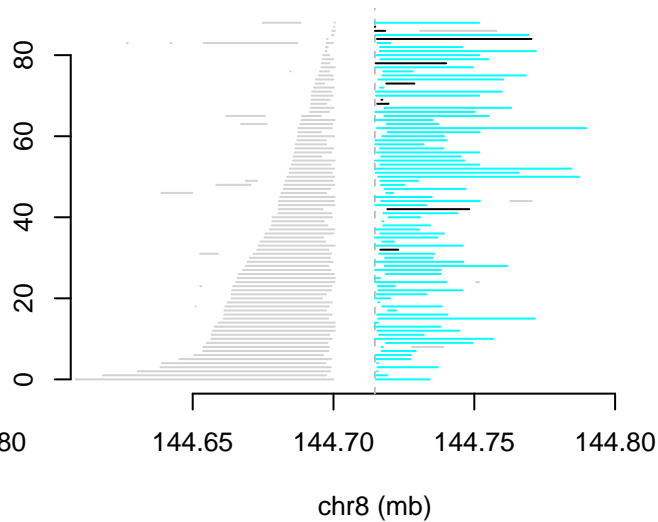

Copy number

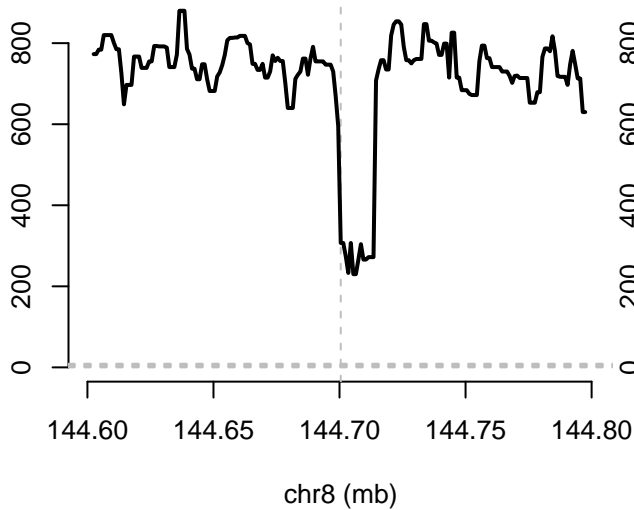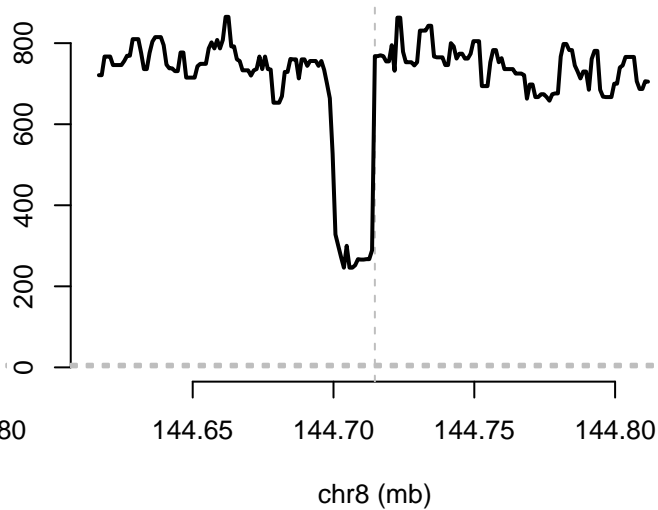

K562 chr8:144,714,692::chr8:144,700,487-+

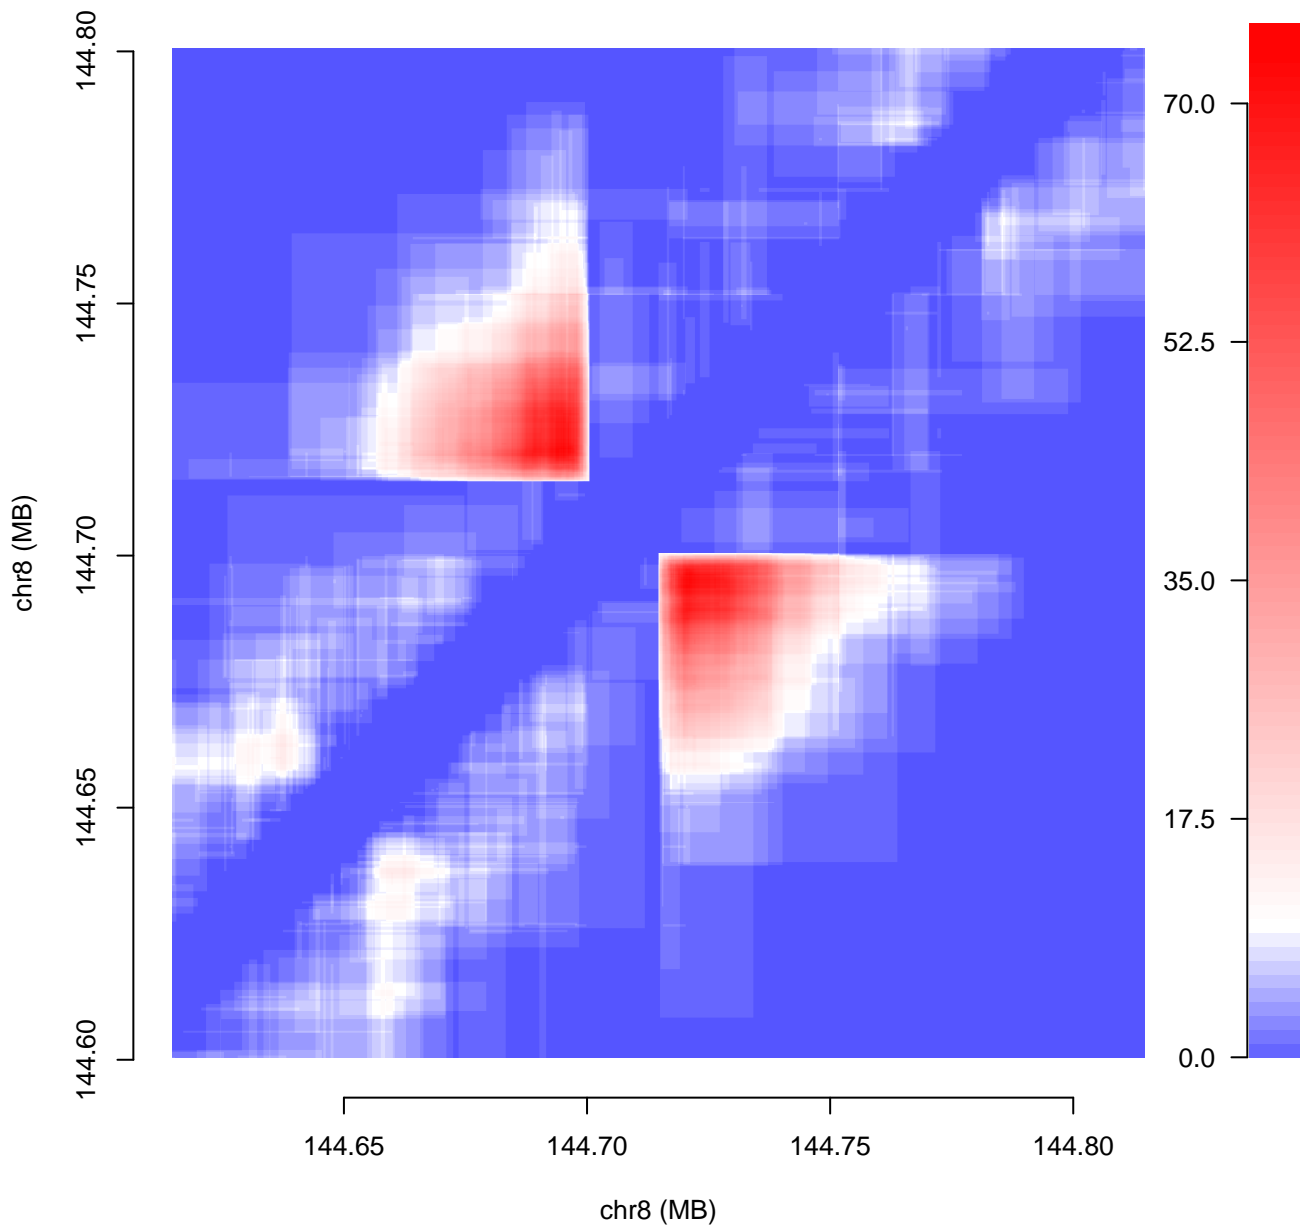

Supplement: Supplemental_Data.zip [file event_394.pdf › event_394.pdf]

Barcode

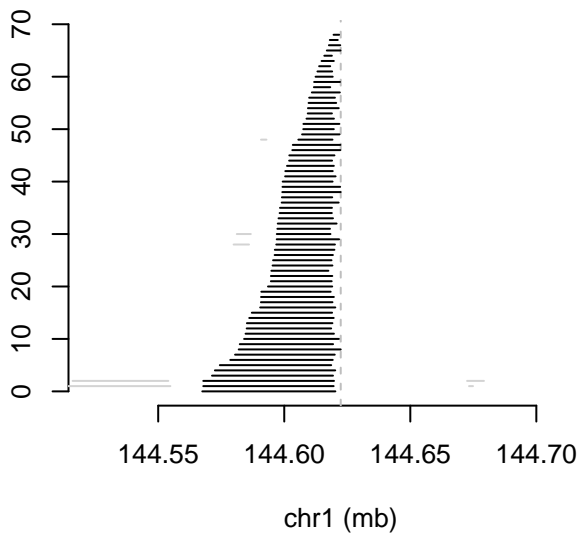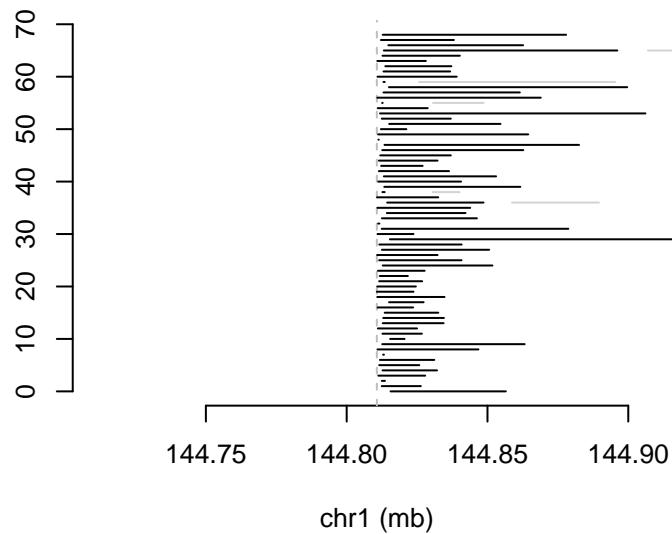

Copy number

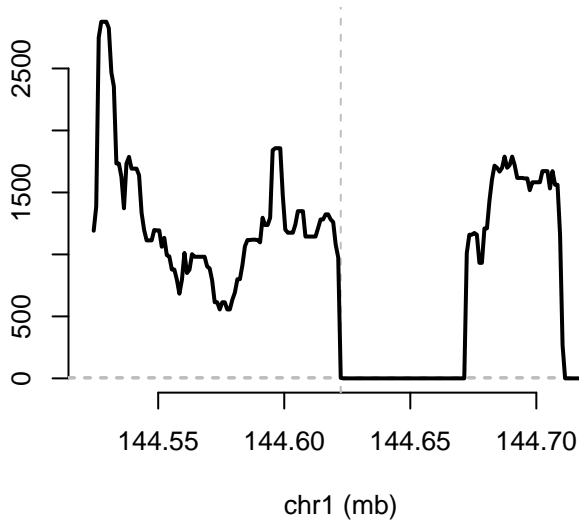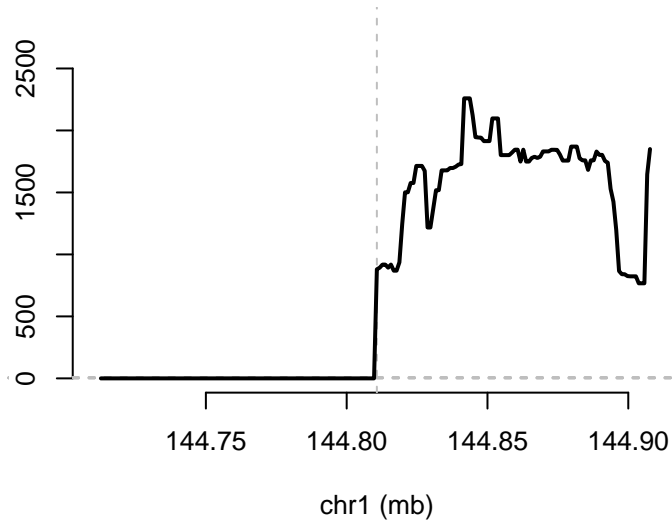

K562 chr1:144,810,724::chr1:144,622,408-+

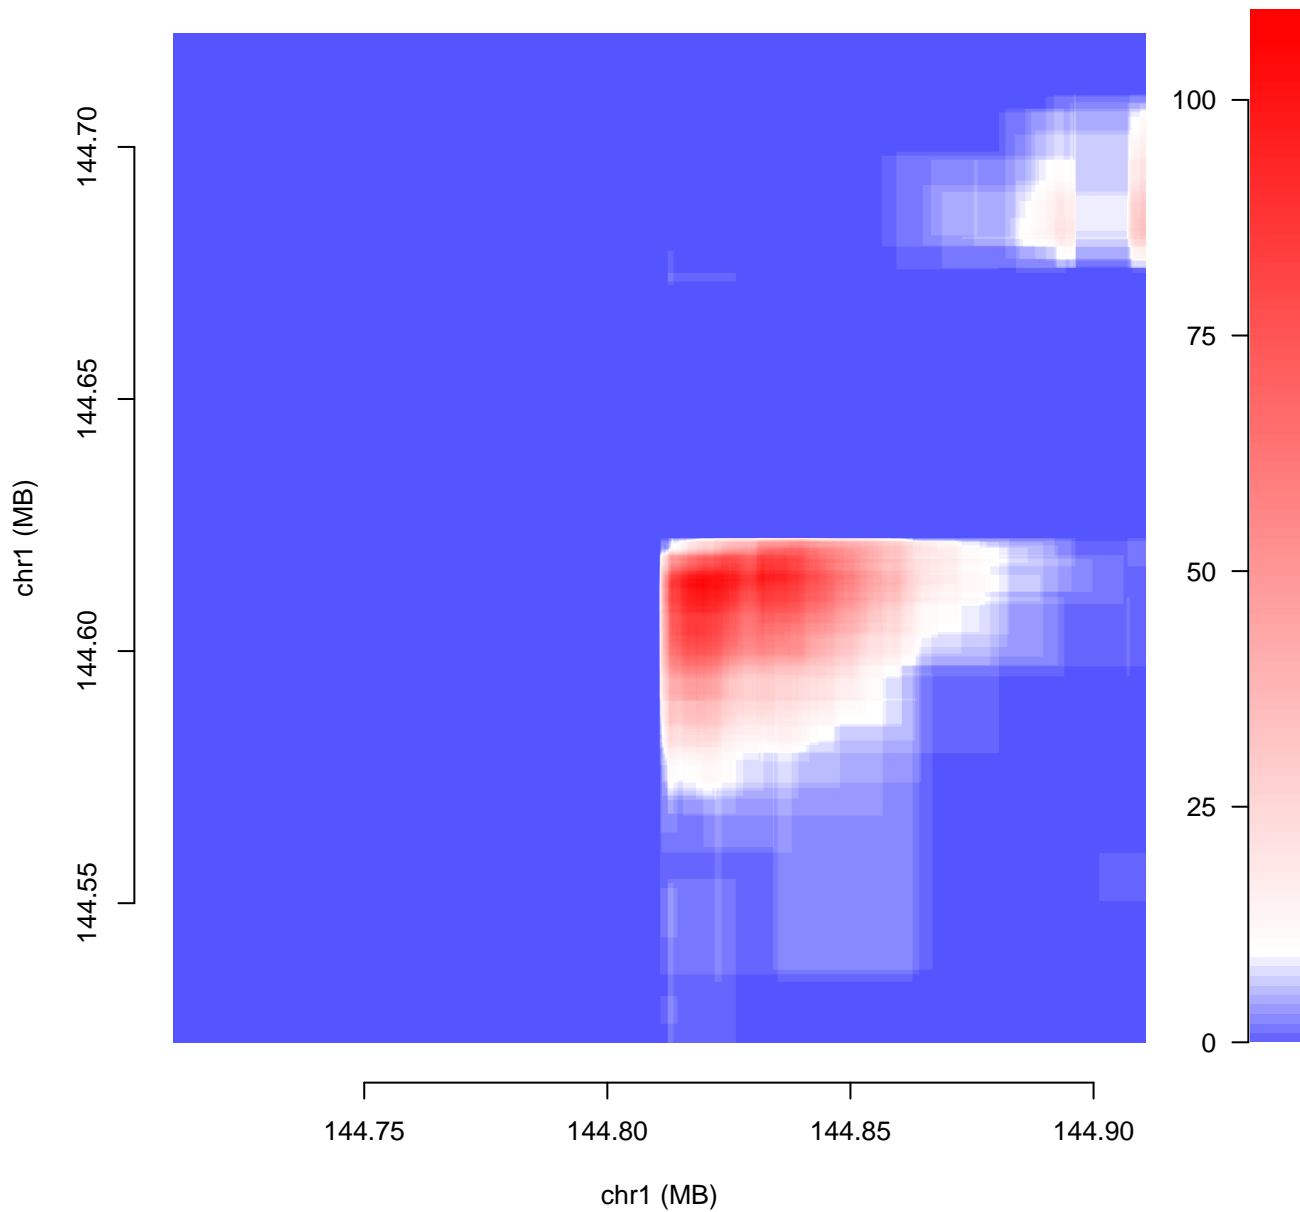

Supplement: Supplemental_Data.zip [file event_395.pdf › event_395.pdf]

Barcode

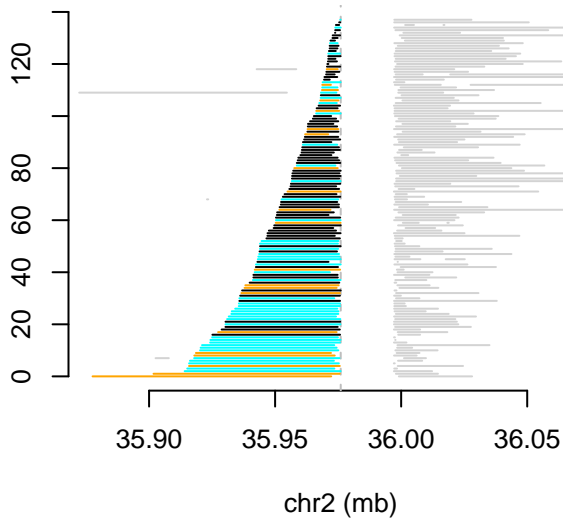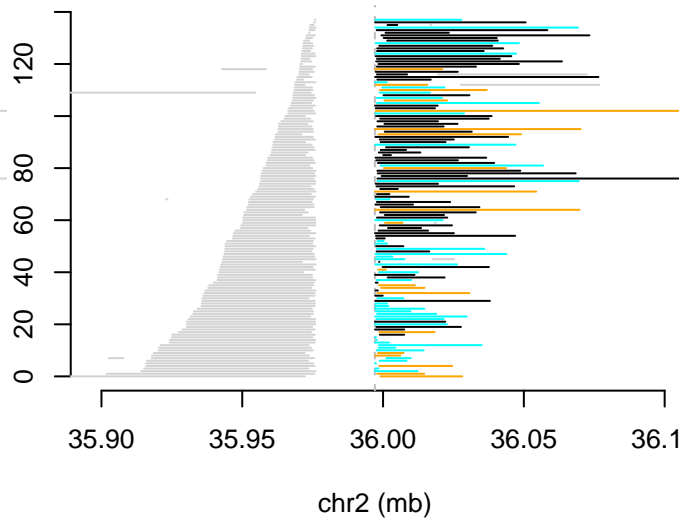

Copy number

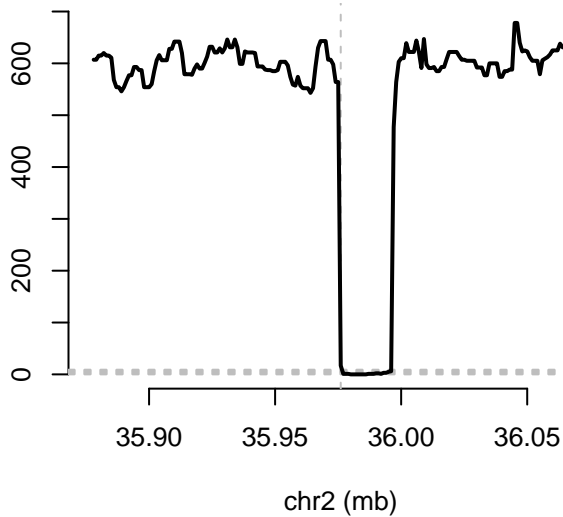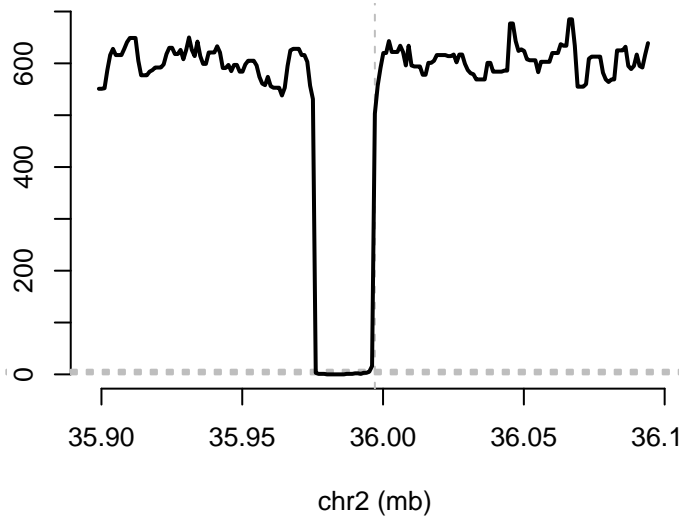

K562 chr2:35,976,035::chr2:35,997,091+-

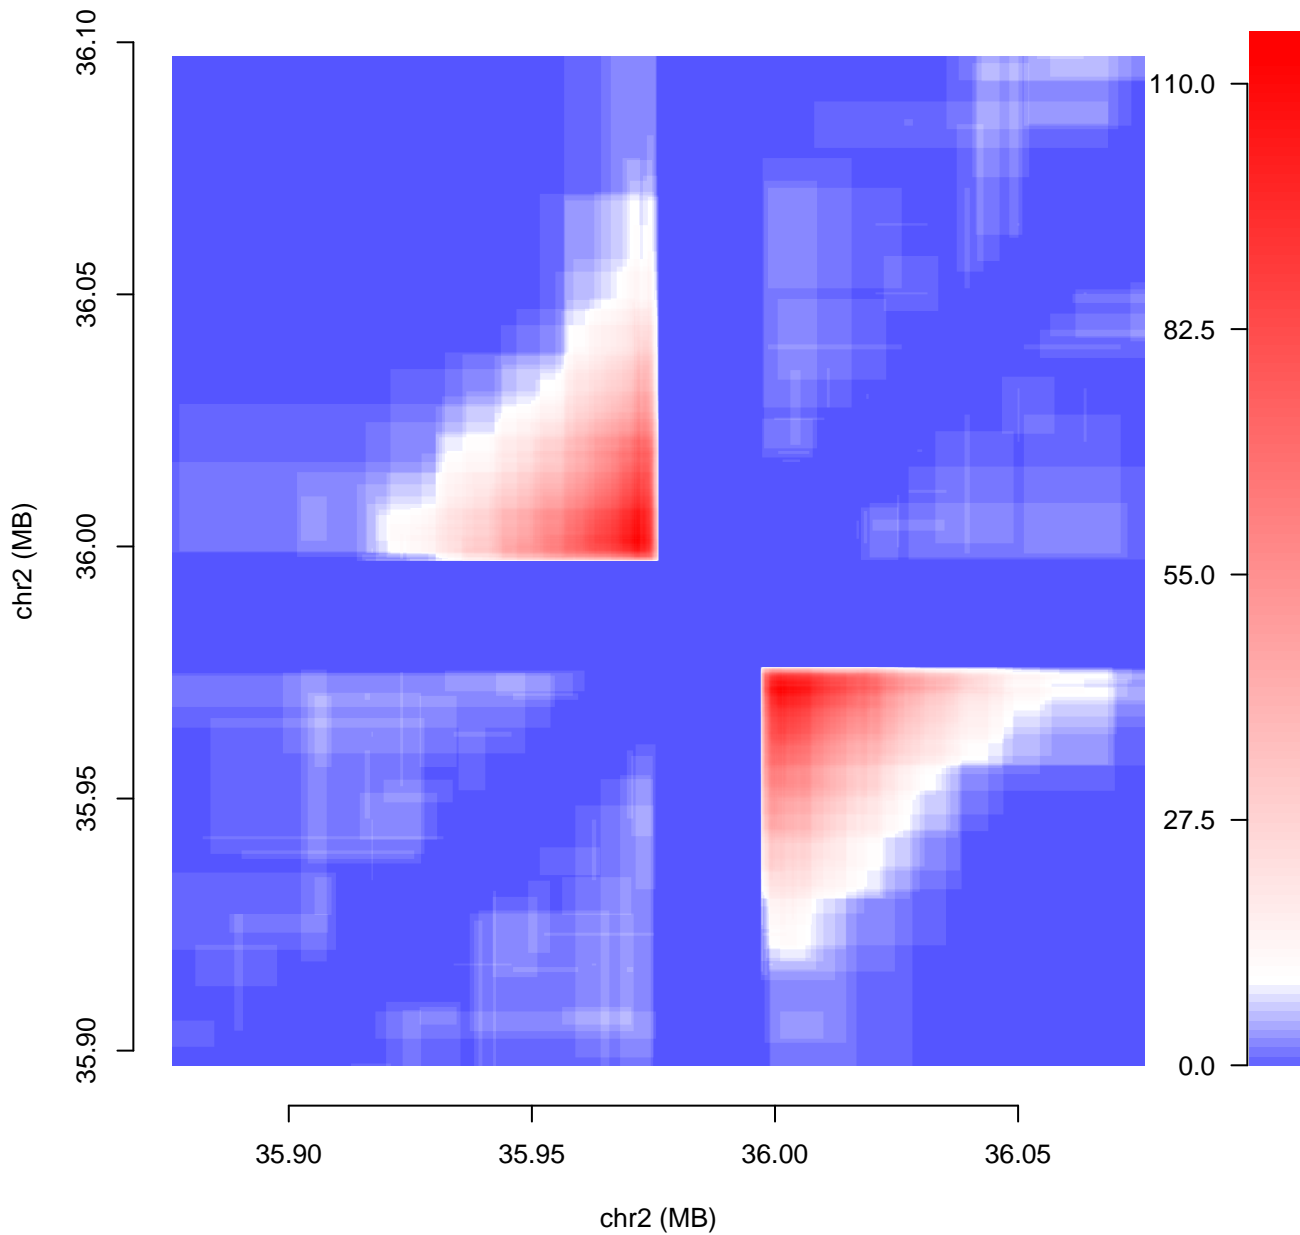

Supplement: Supplemental_Data.zip [file event_396.pdf › event_396.pdf]

Barcode

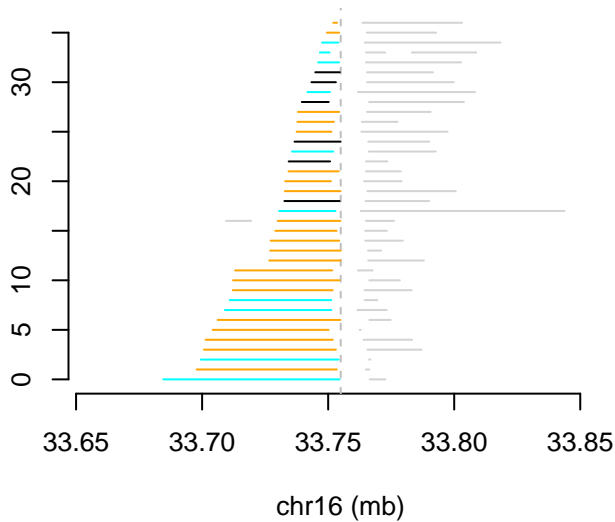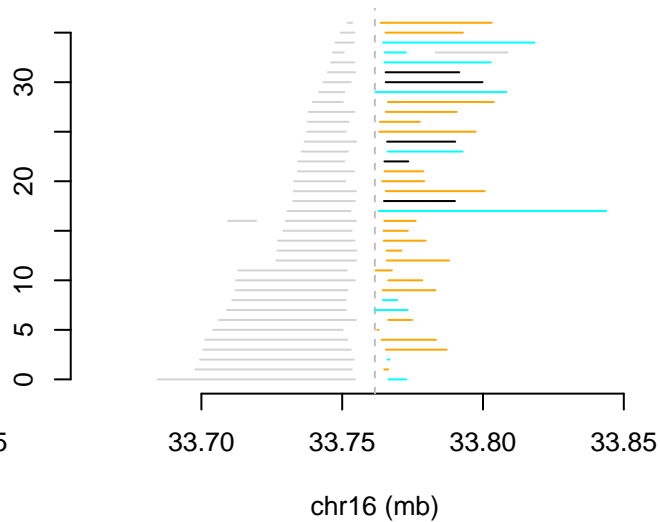

Copy number

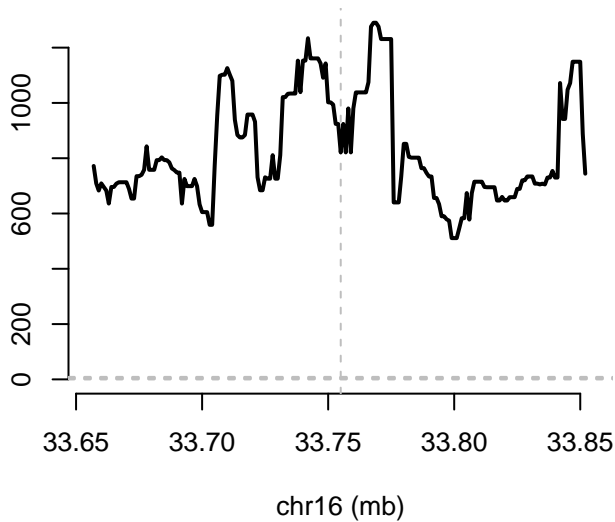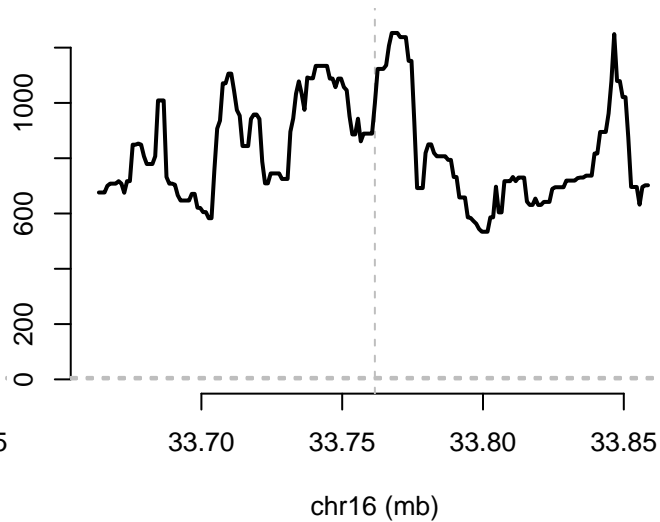

K562 chr16:33,754,990::chr16:33,761,602+-

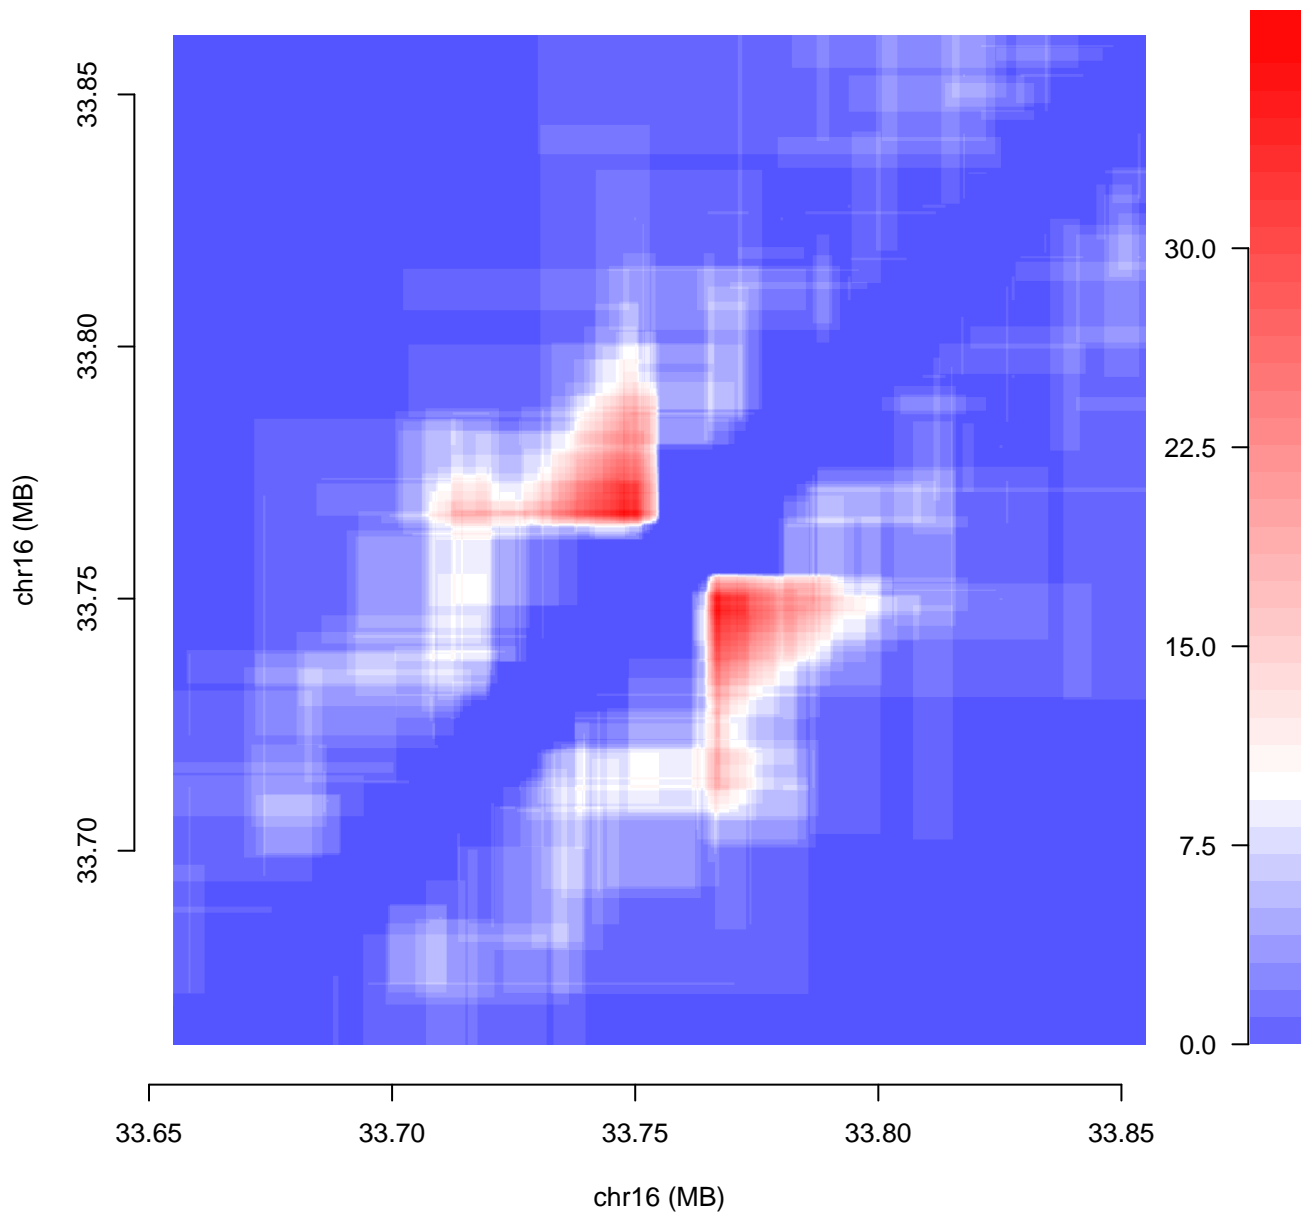

Supplement: Supplemental_Data.zip [file event_397.pdf › event_397.pdf]

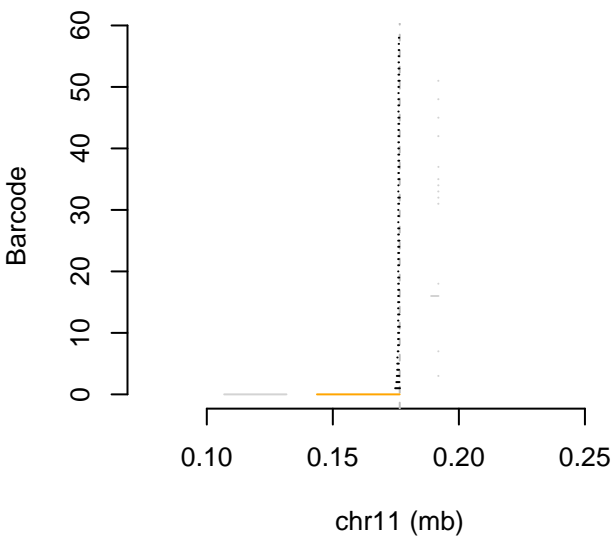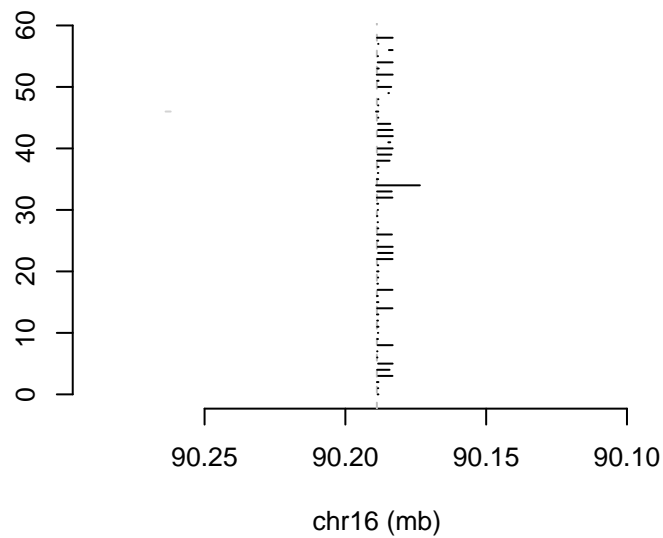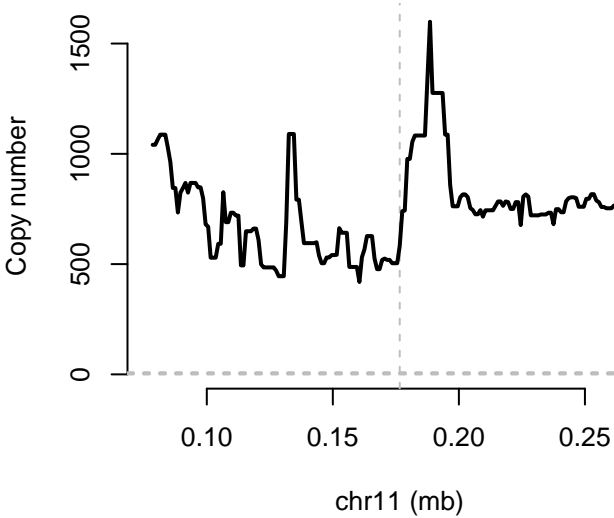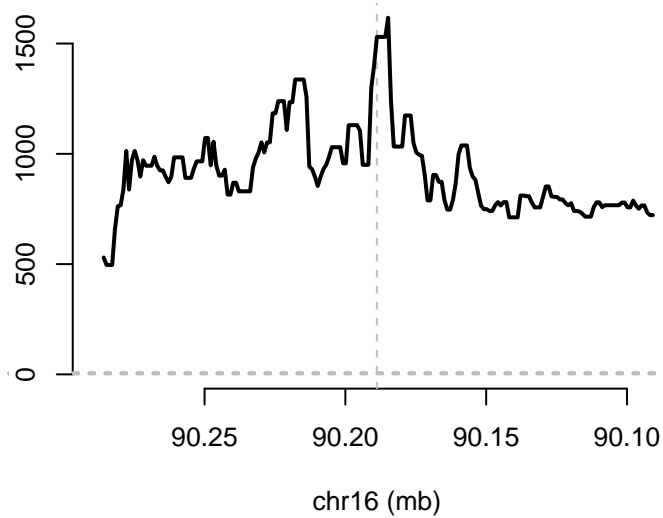

K562 chr11:176,542::chr16:90,188,815++

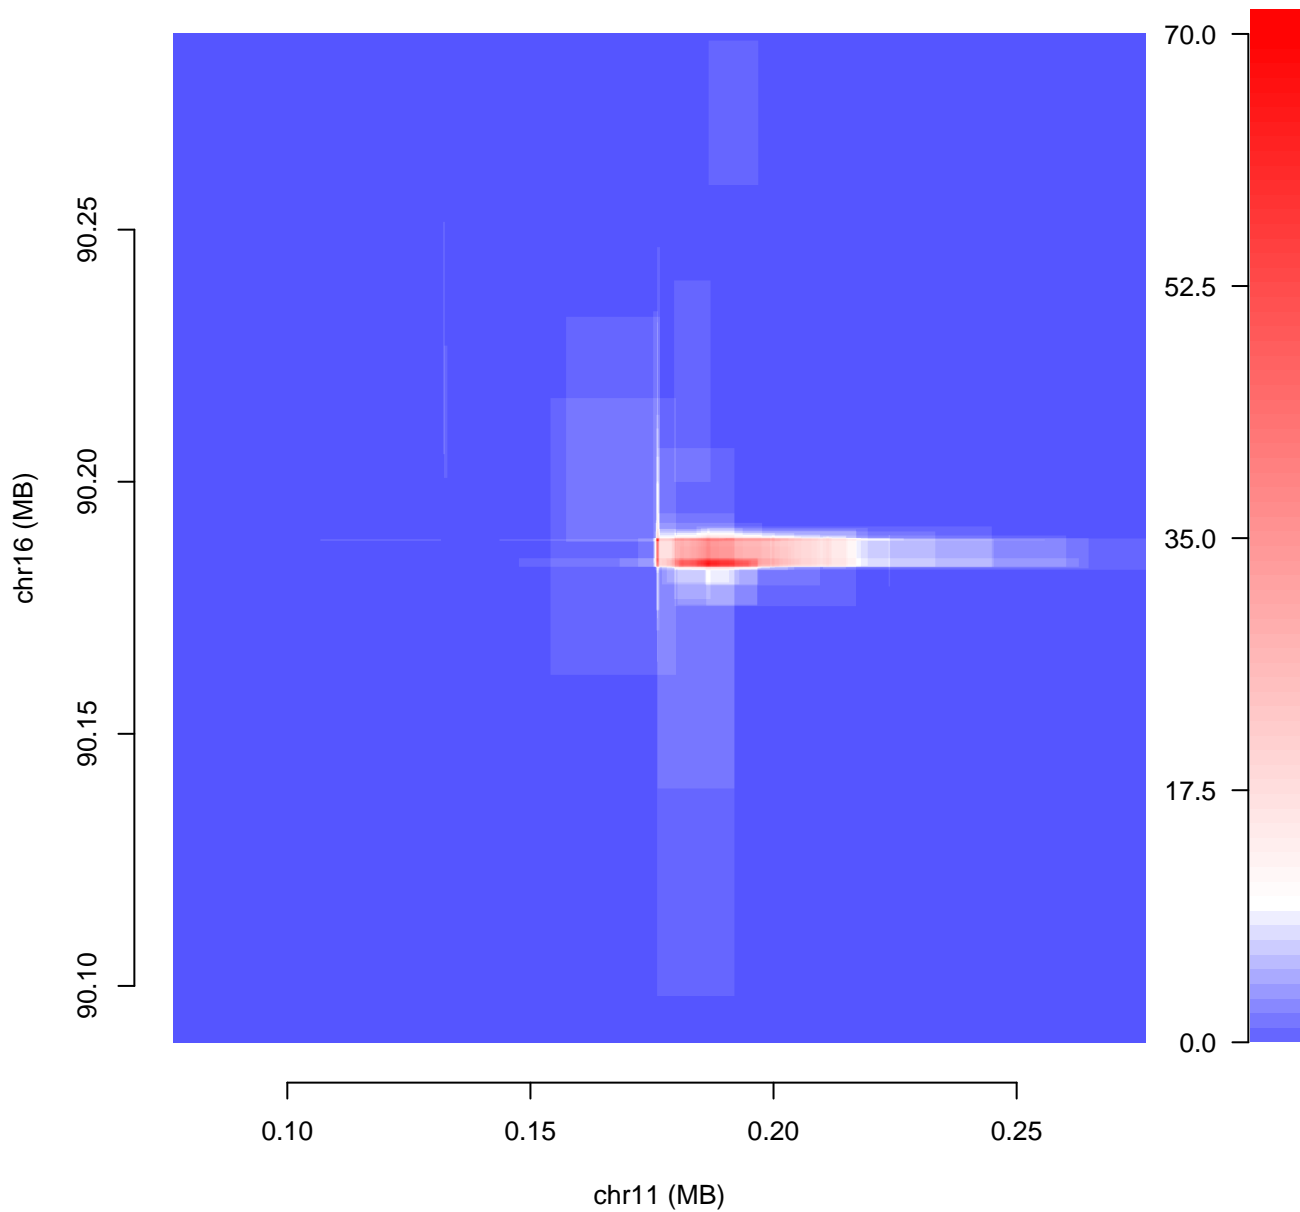

Supplement: Supplemental_Data.zip [file event_398.pdf › event_398.pdf]

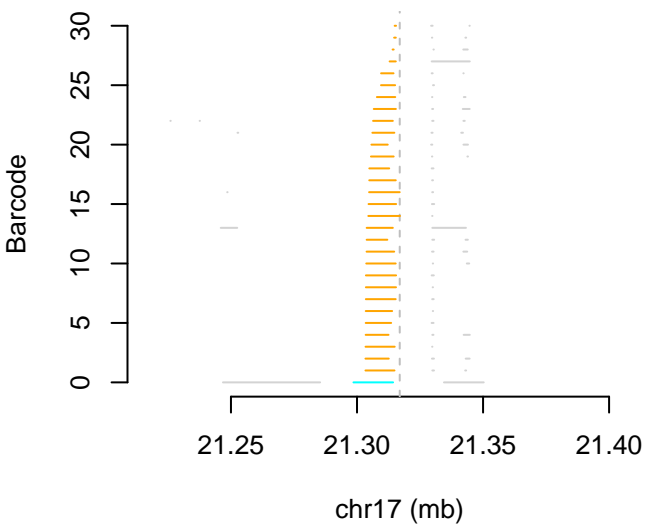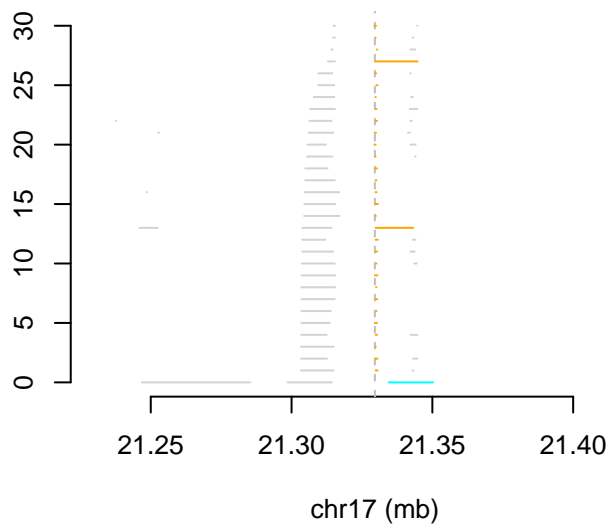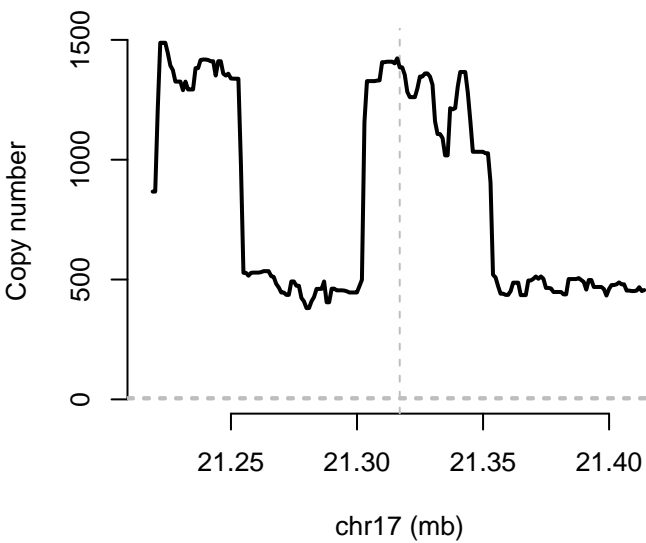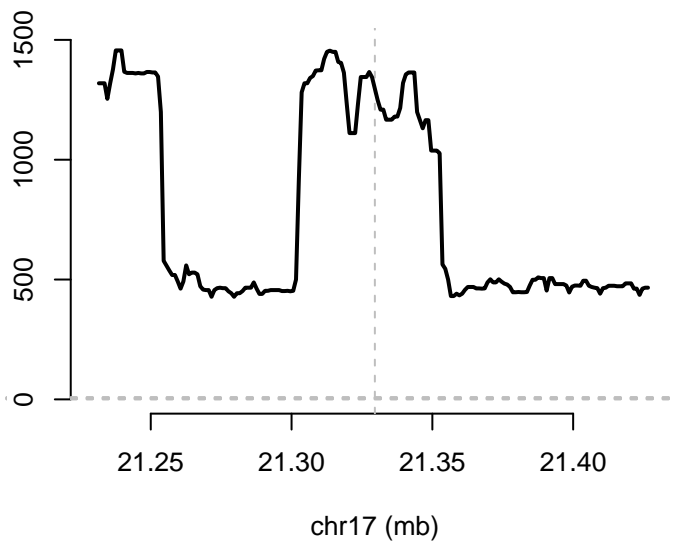

K562 chr17:21,329,588::chr17:21,316,950-+

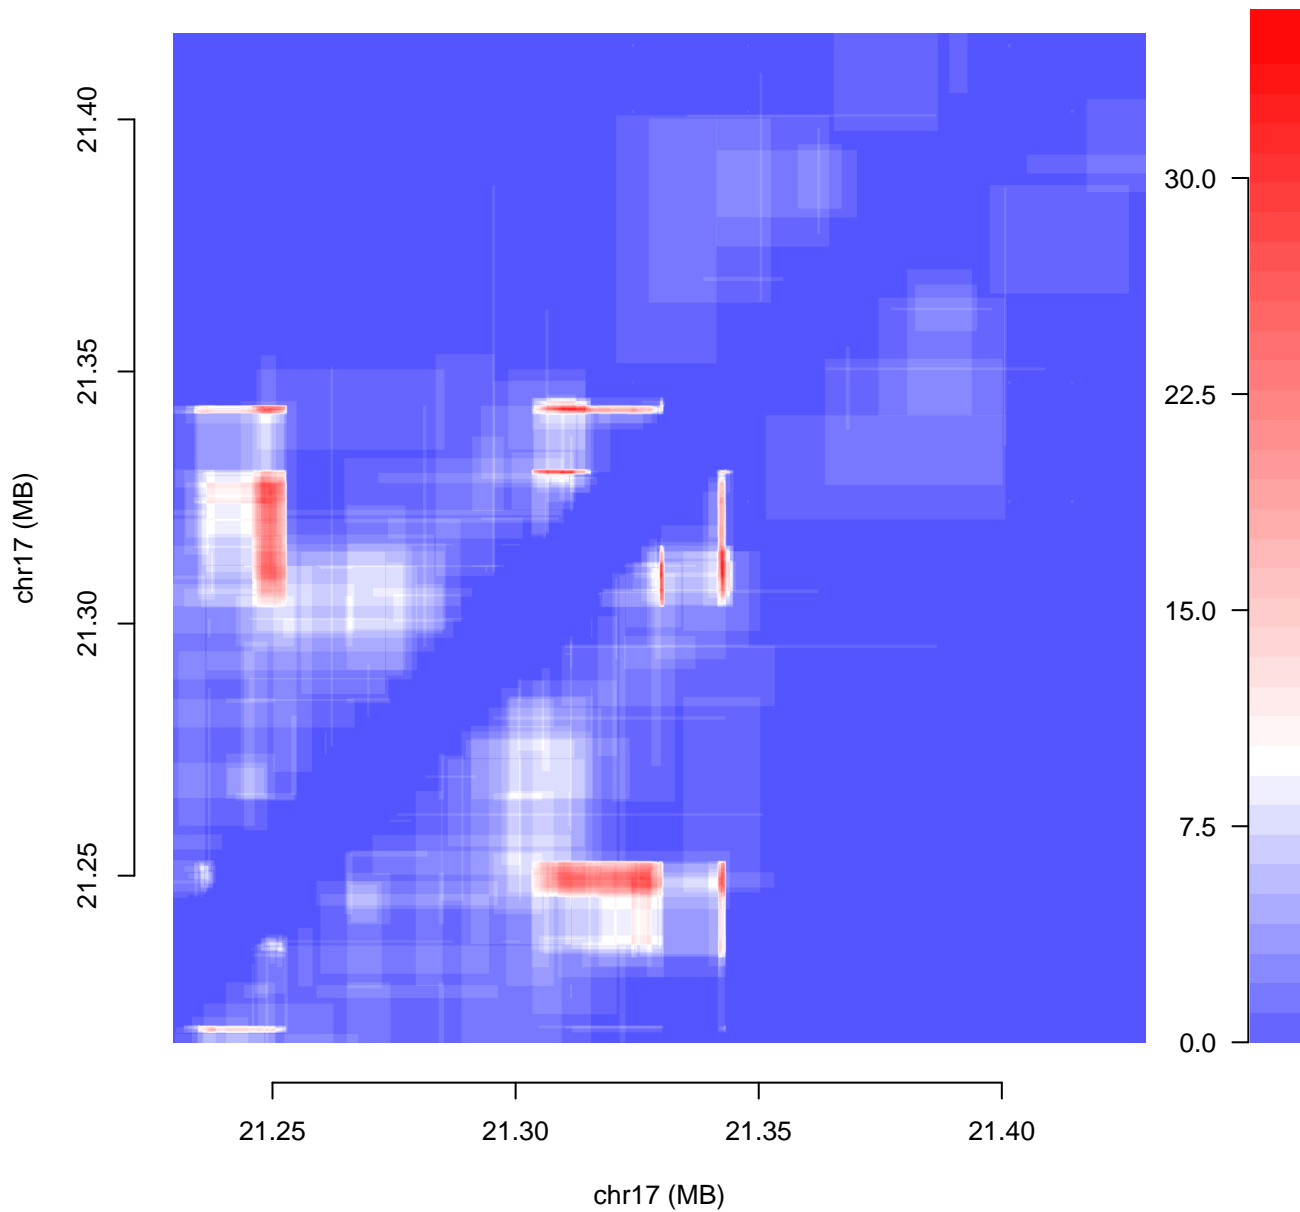

Supplement: Supplemental_Data.zip [file event_399.pdf › event_399.pdf]

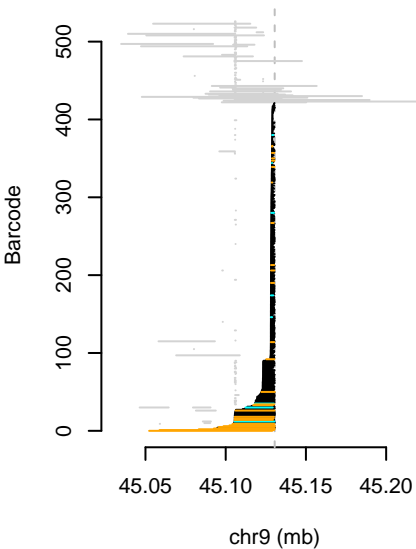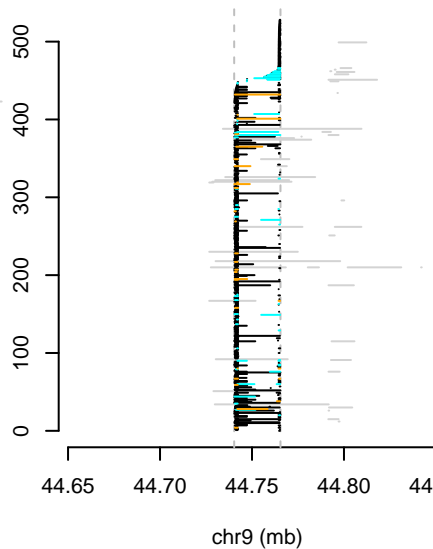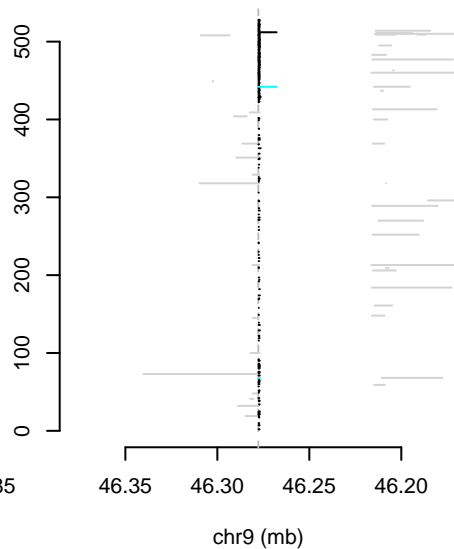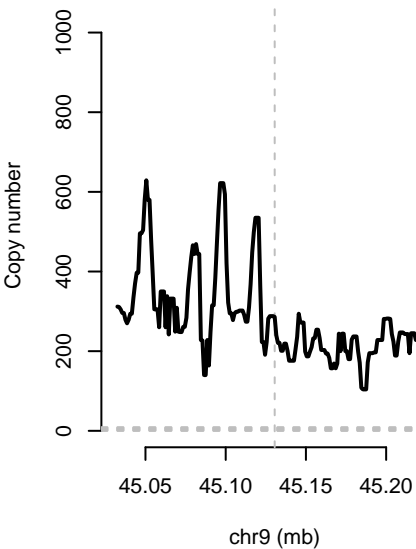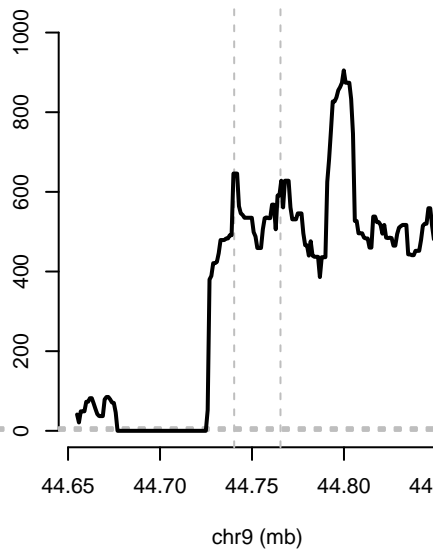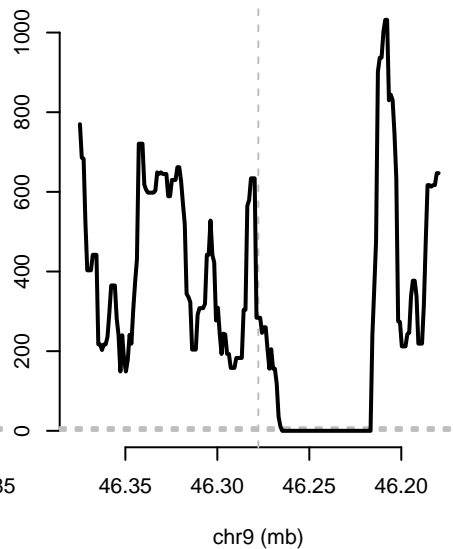

K562 chr9:45,130,531::chr9:44,740,324+-

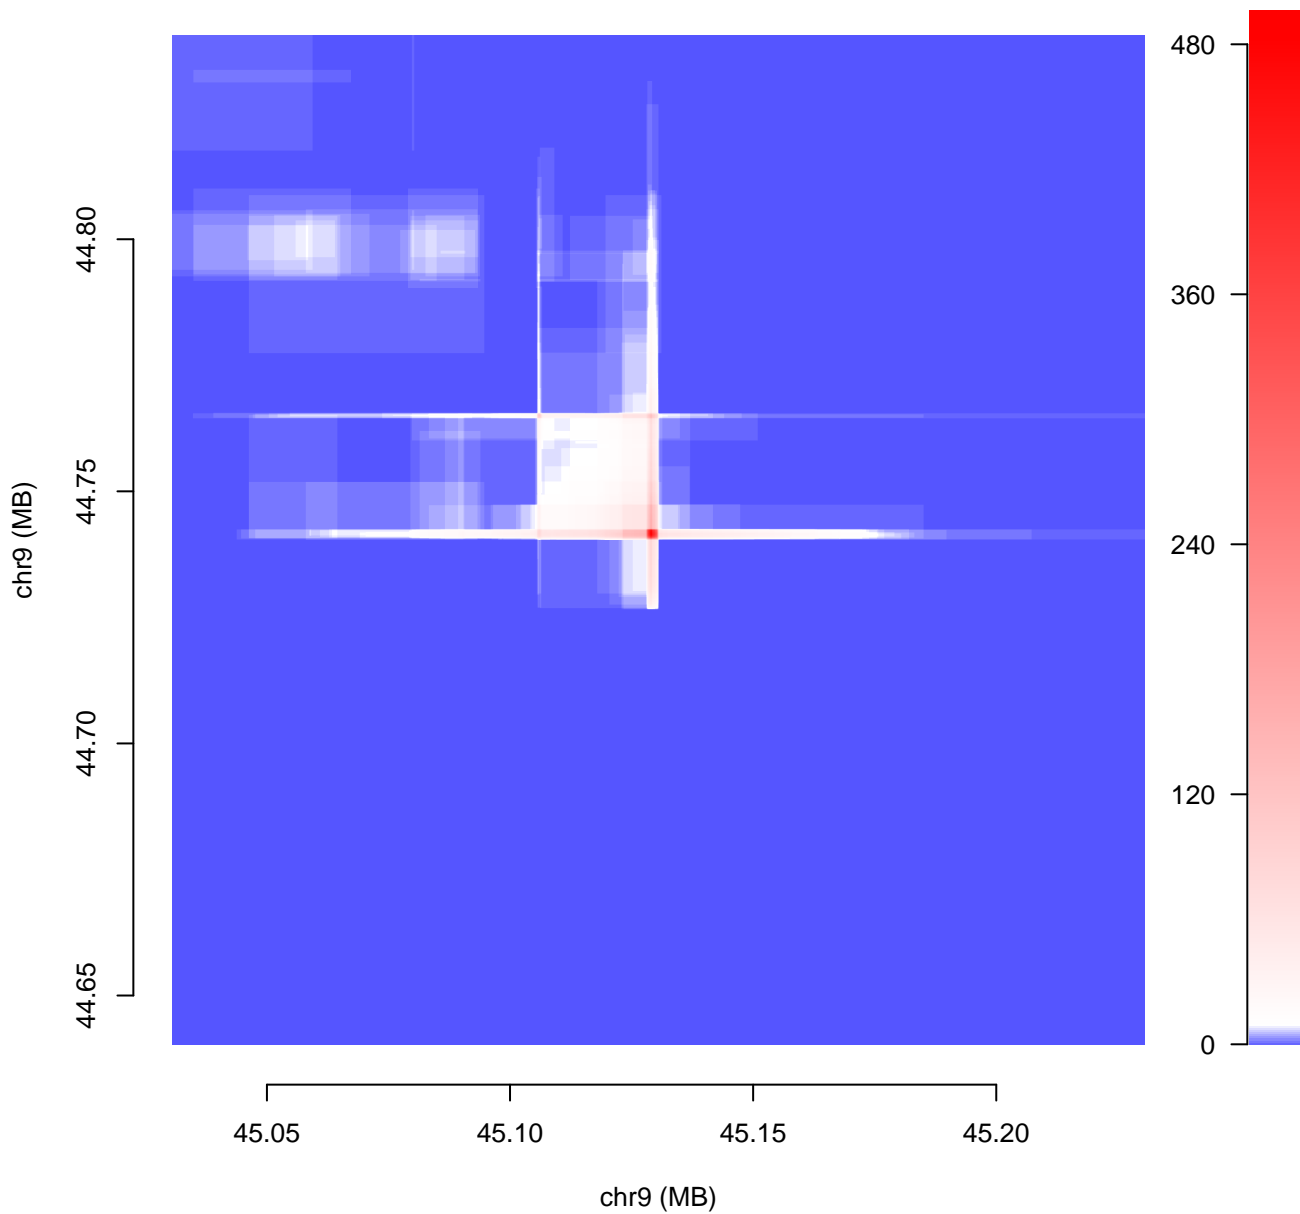

K562 chr9:44,740,324::chr9:44,765,494-+

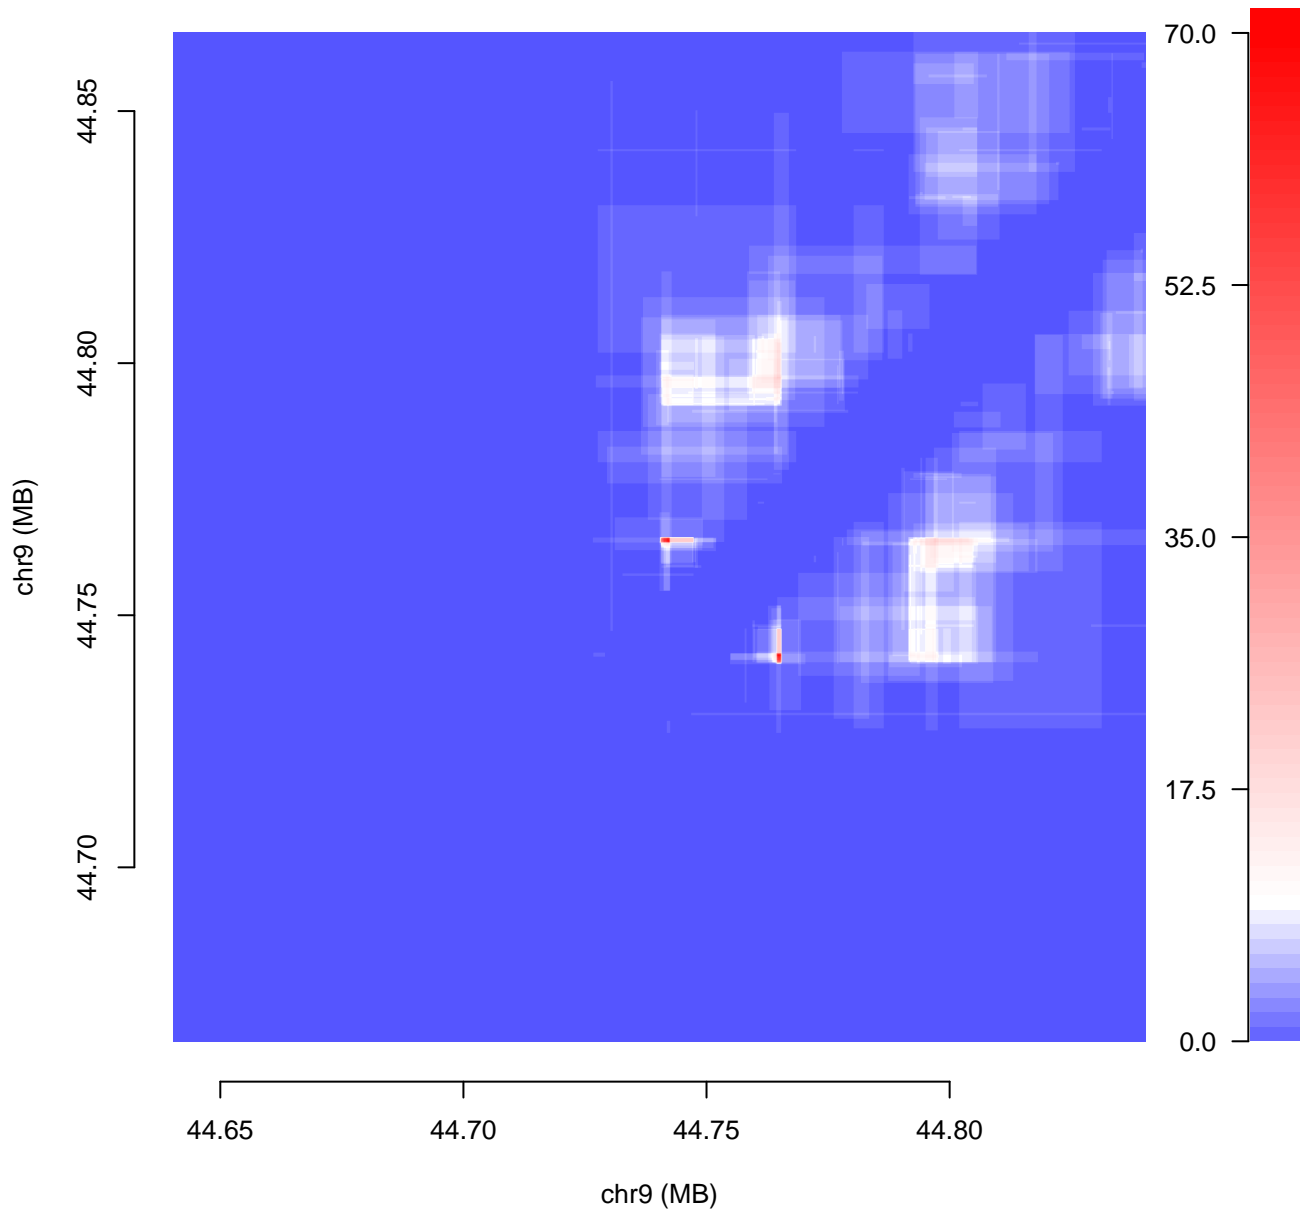

K562 chr9:46,277,713::chr9:44,765,494++

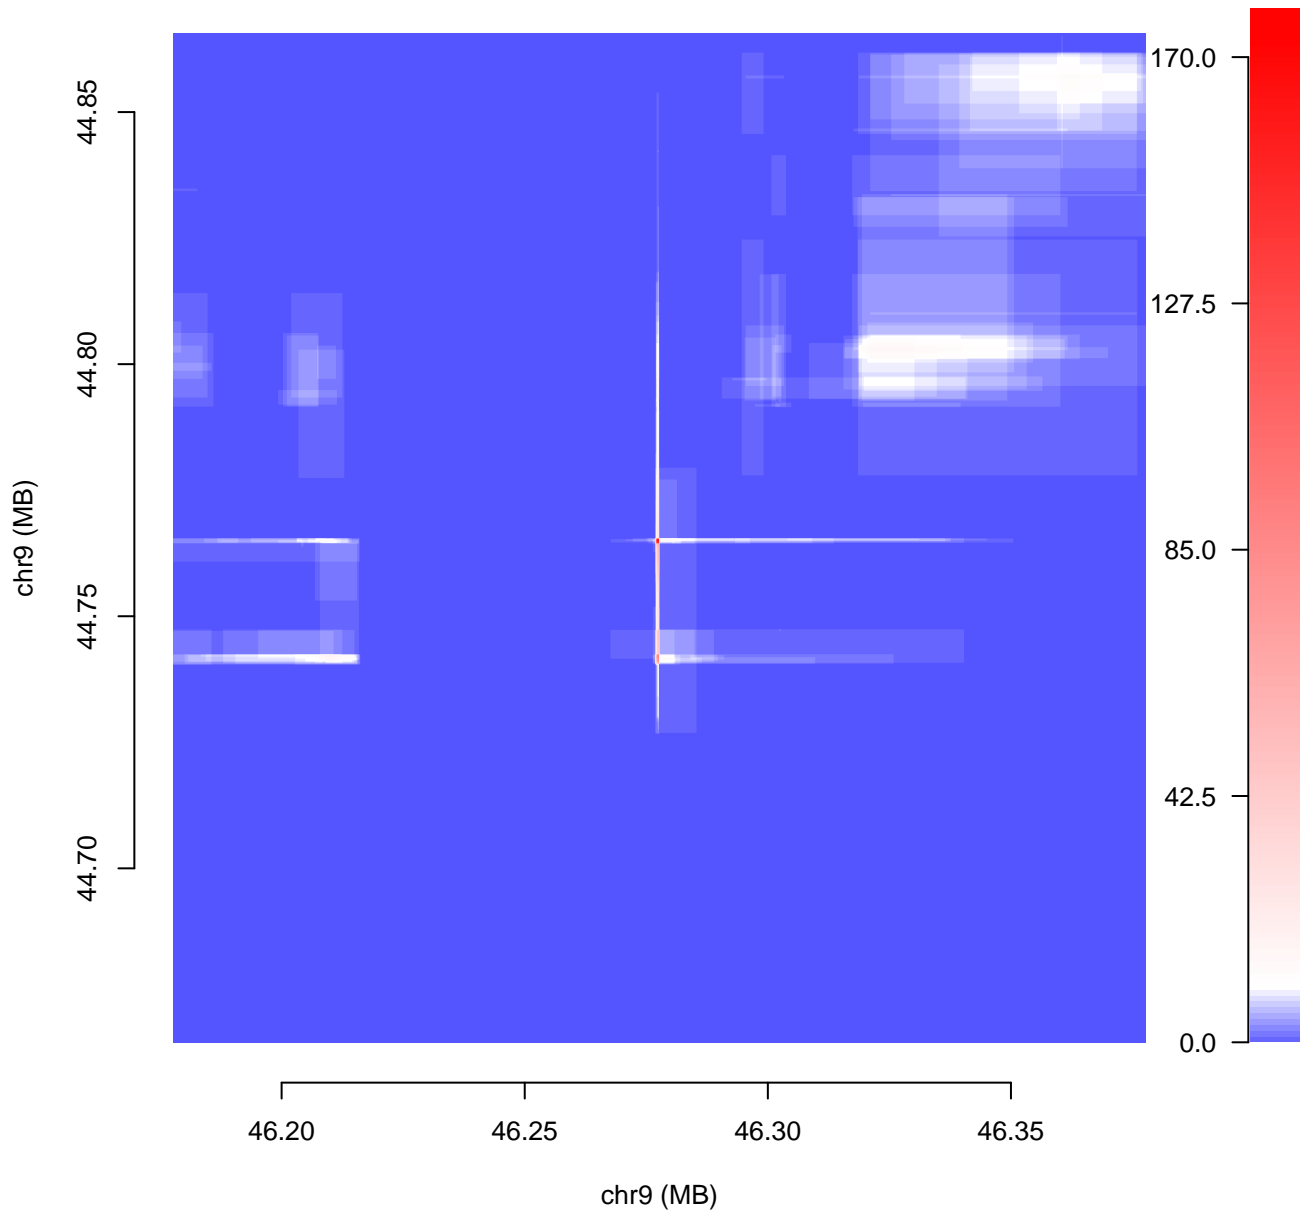

Supplement: Supplemental_Data.zip [file event_4.pdf › event_4.pdf]

Barcode

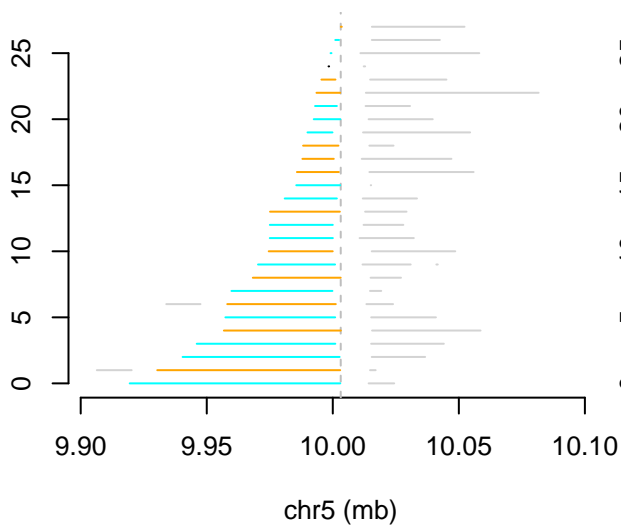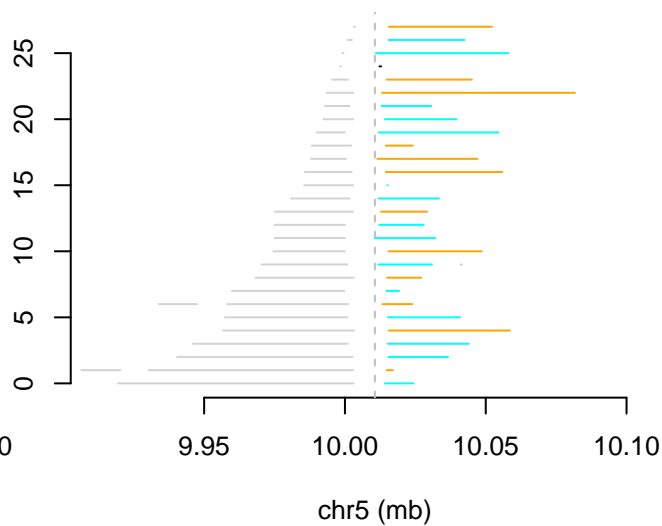

Copy number

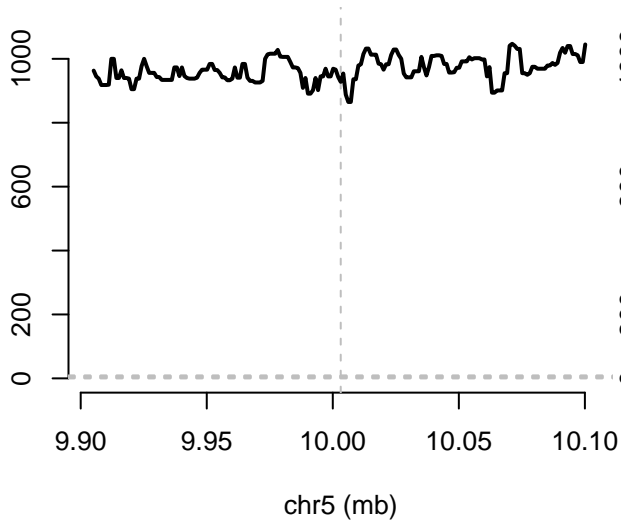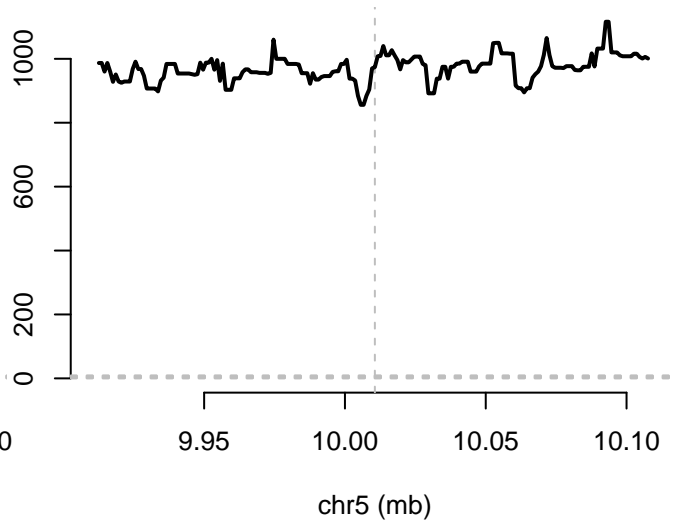

K562 chr5:10,010,627::chr5:10,003,152-+

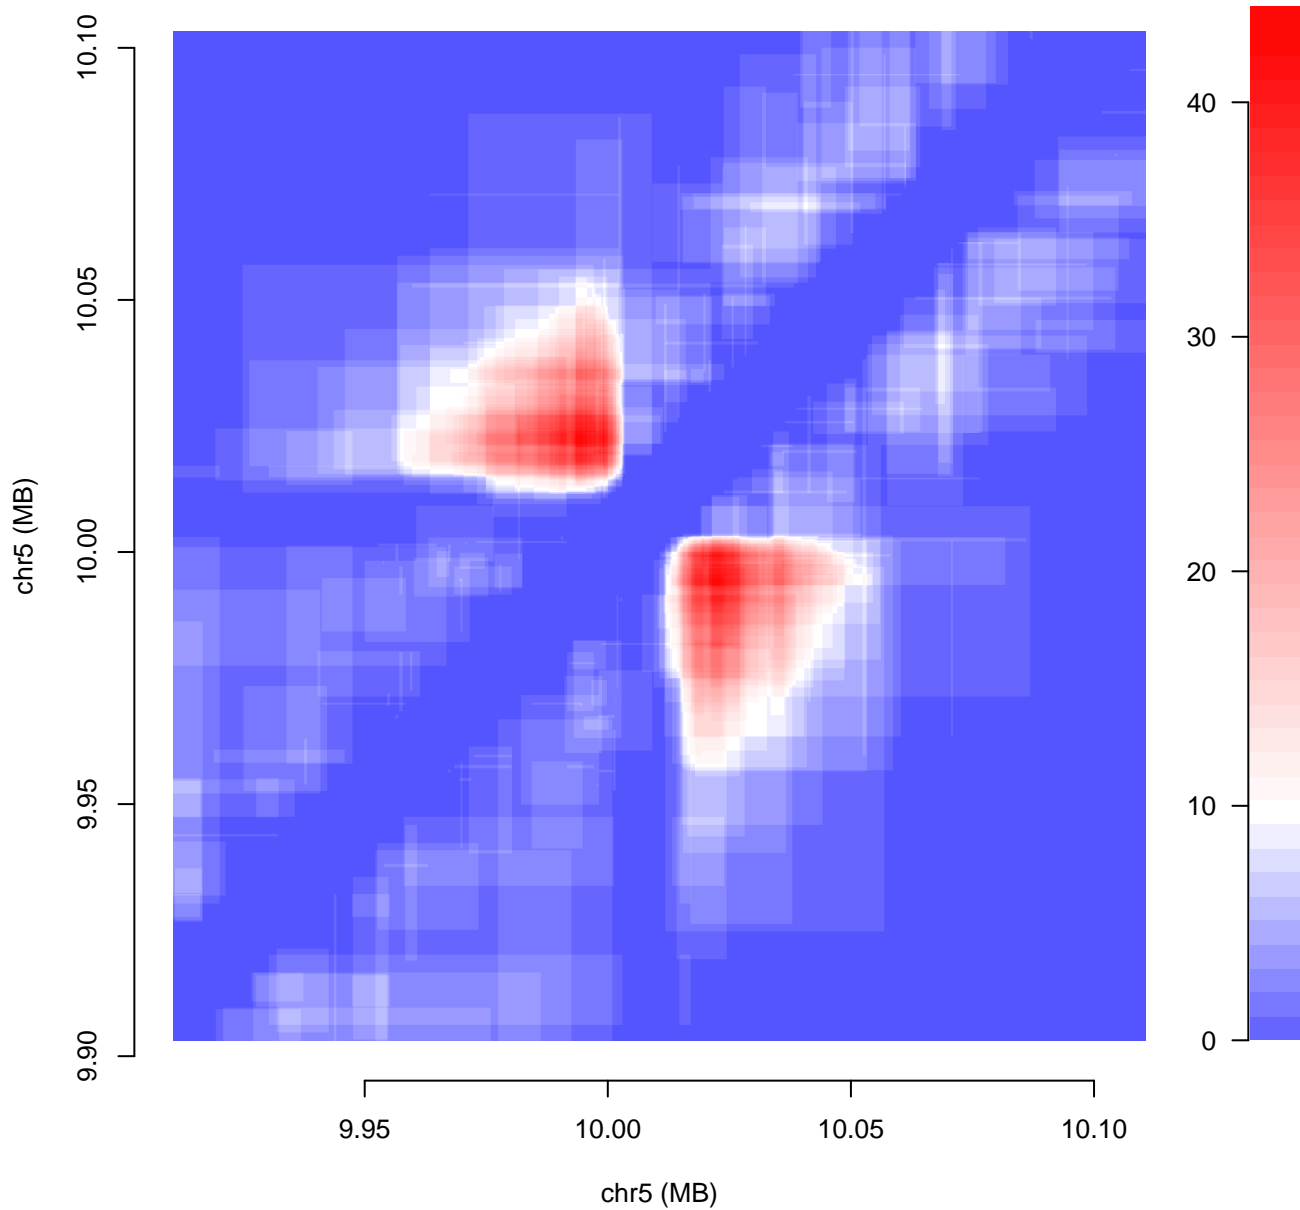

Supplement: Supplemental_Data.zip [file event_40.pdf › event_40.pdf]

Barcode

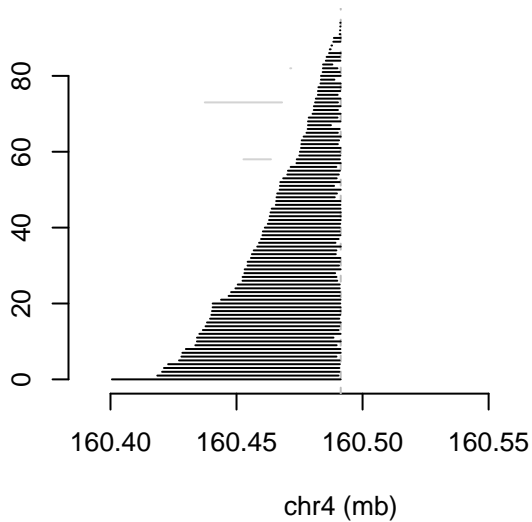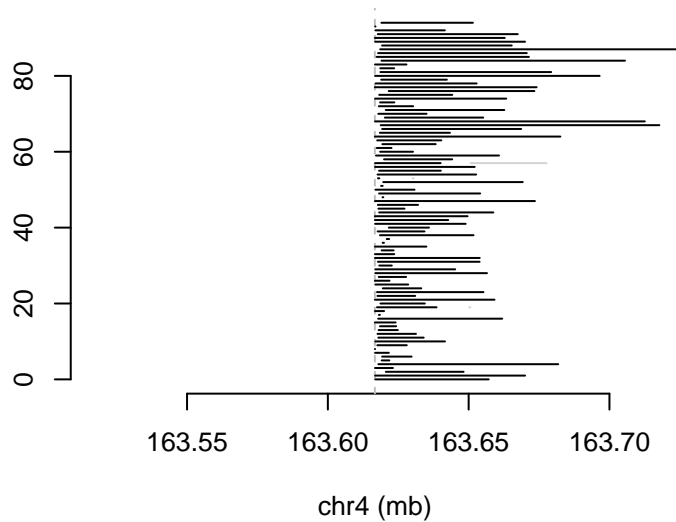

Copy number

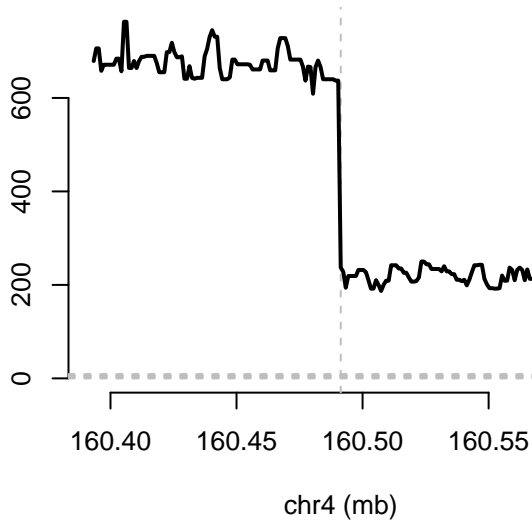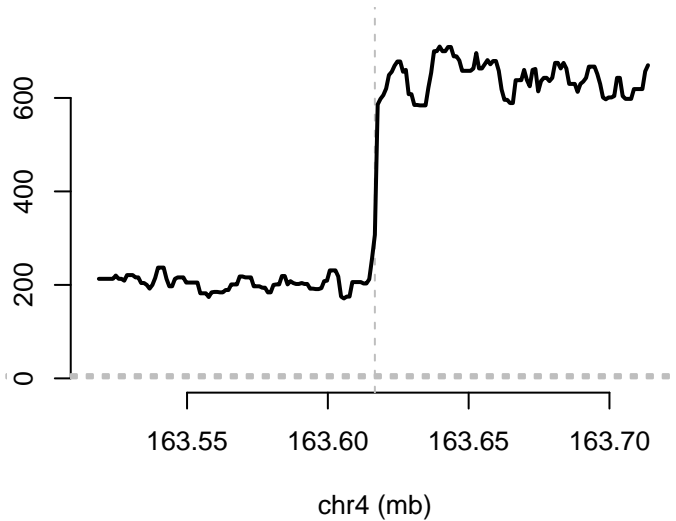

K562 chr4:163,616,700::chr4:160,491,340-+

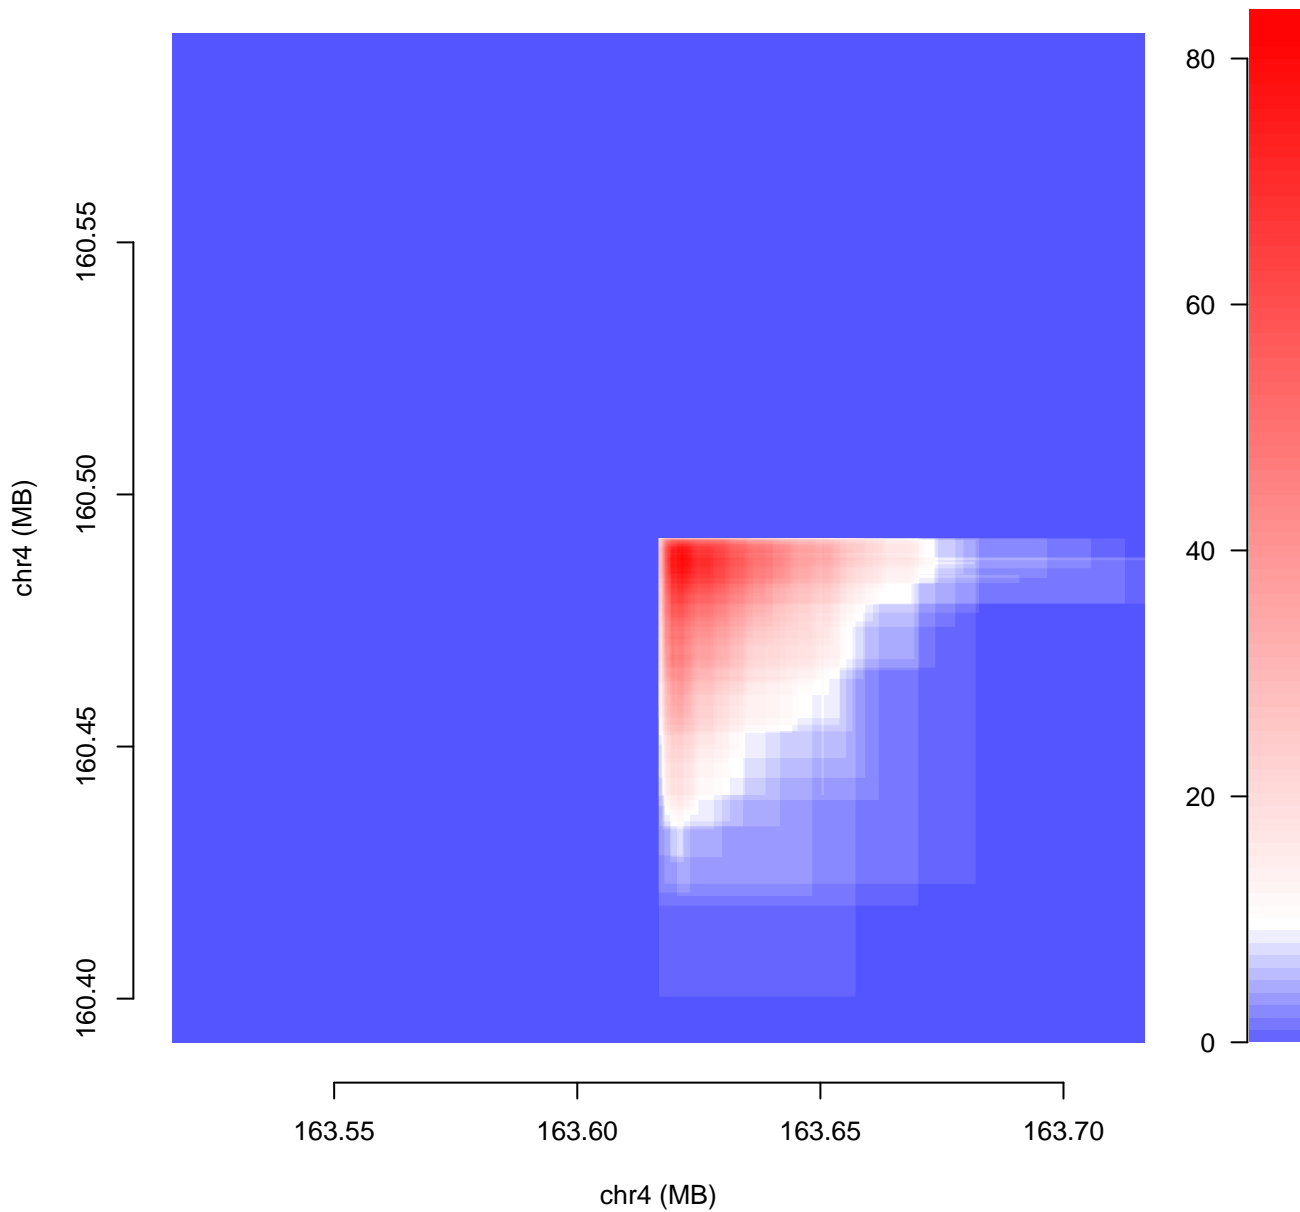

Supplement: Supplemental_Data.zip [file event_400.pdf › event_400.pdf]

Barcode

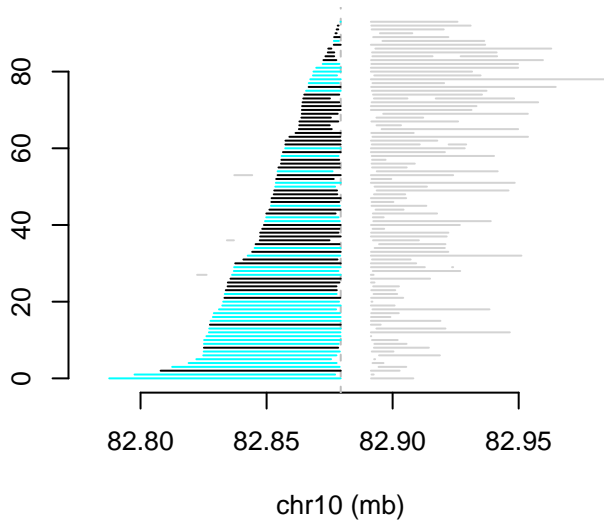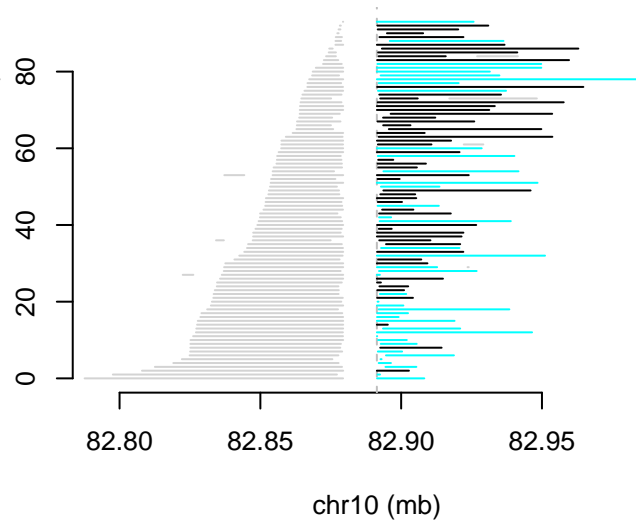

Copy number

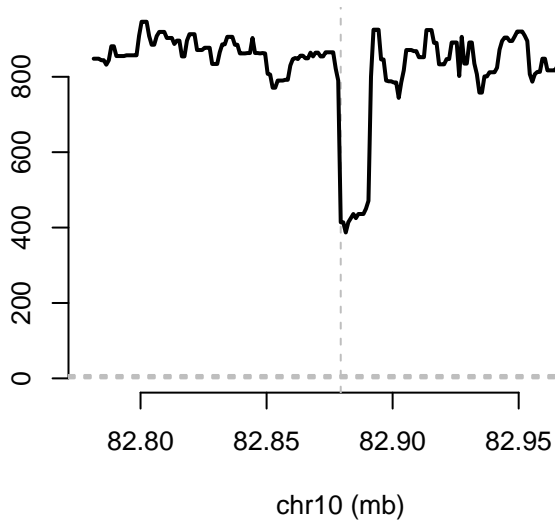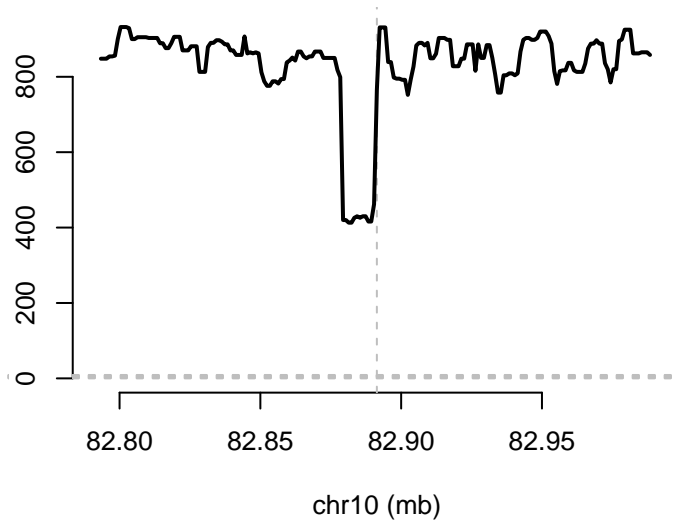

K562 chr10:82,879,416::chr10:82,891,376+-

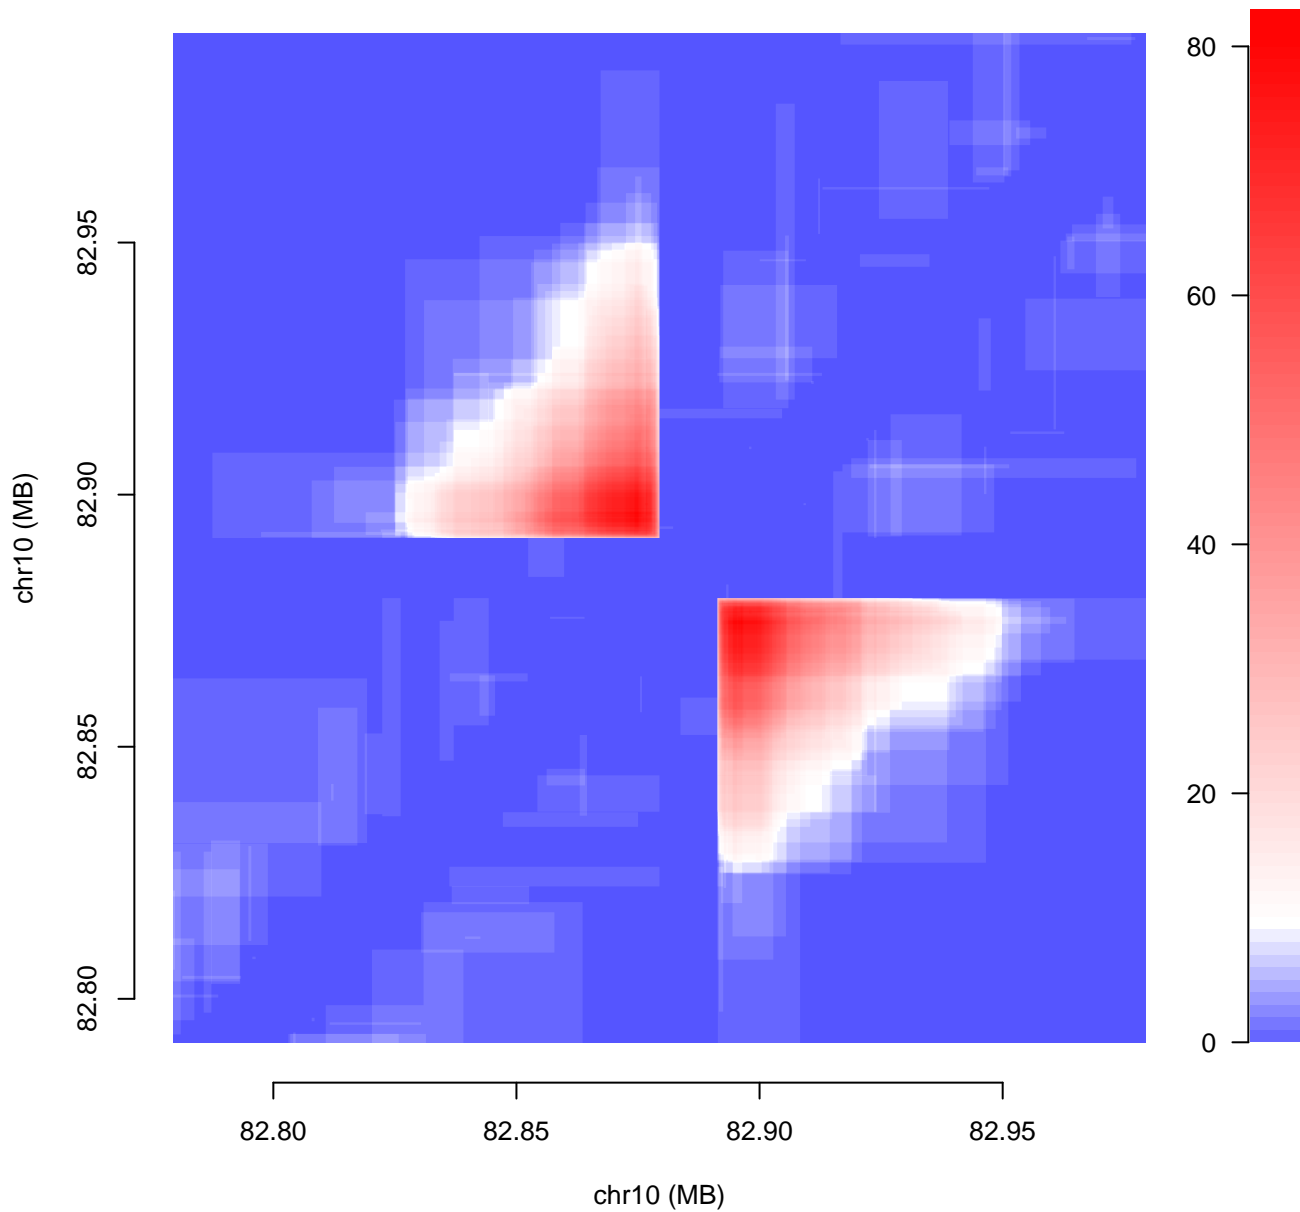

Supplement: Supplemental_Data.zip [file event_401.pdf › event_401.pdf]

Barcode

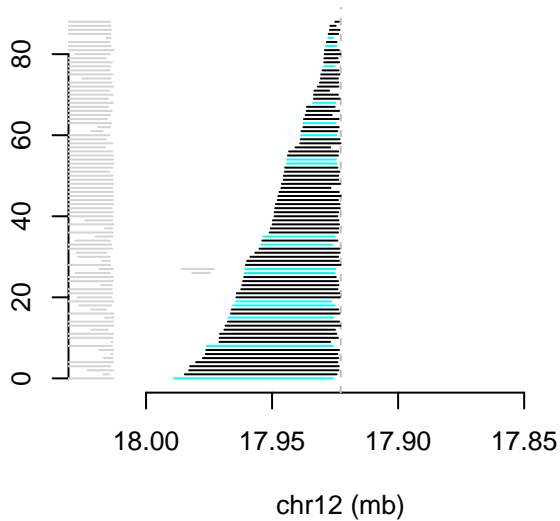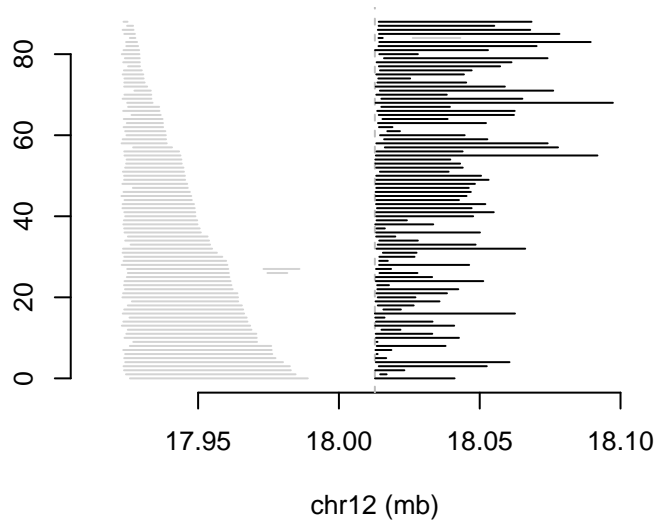

Copy number

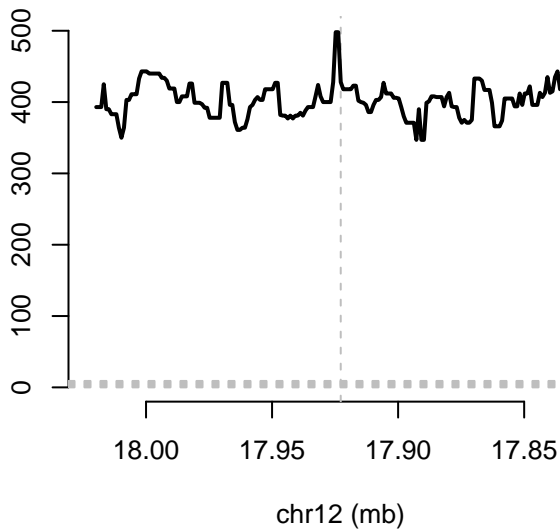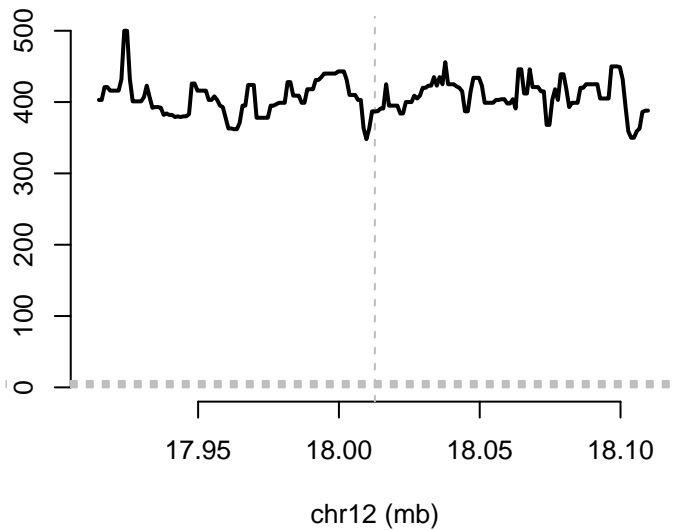

K562 chr12:17,922,760::chr12:18,012,763--

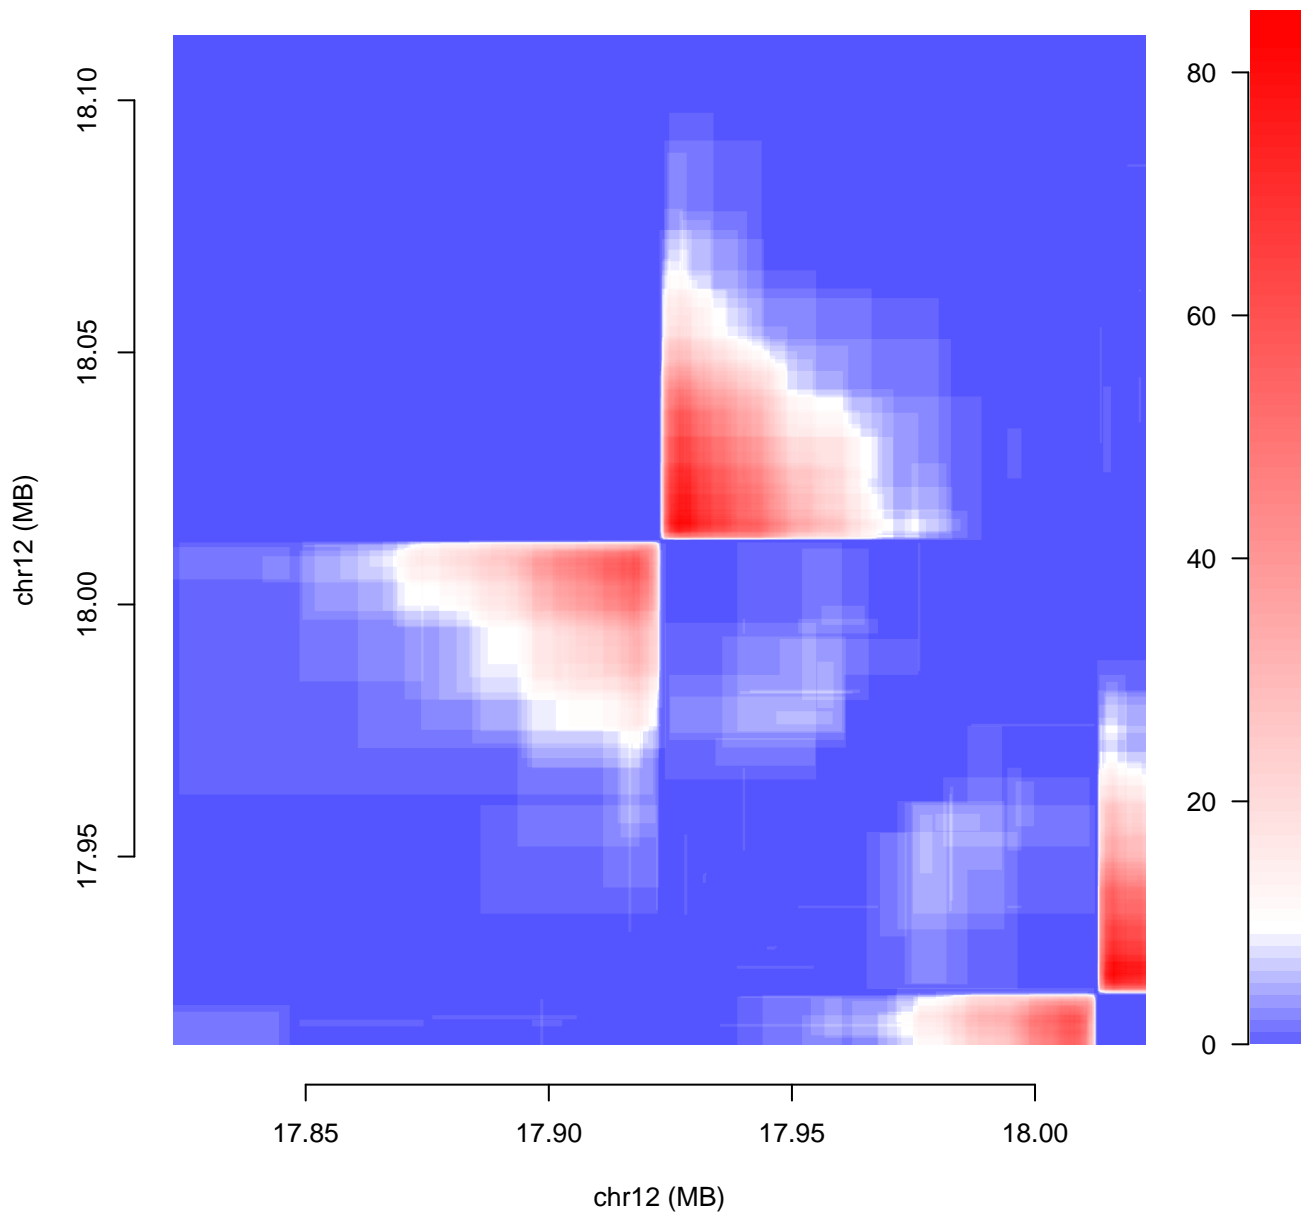

Supplement: Supplemental_Data.zip [file event_402.pdf › event_402.pdf]

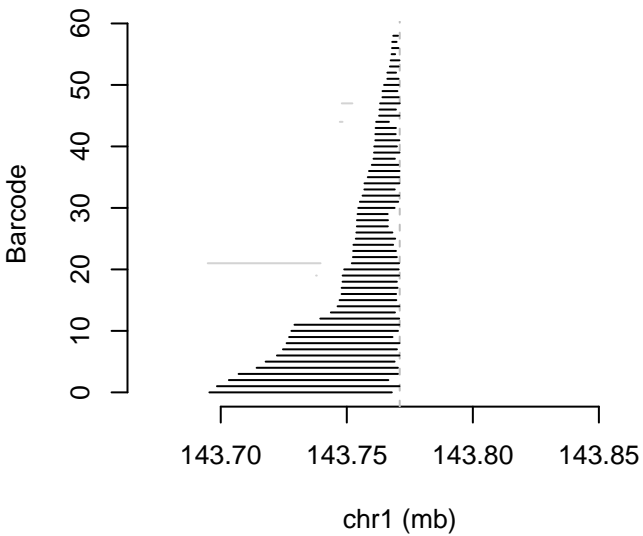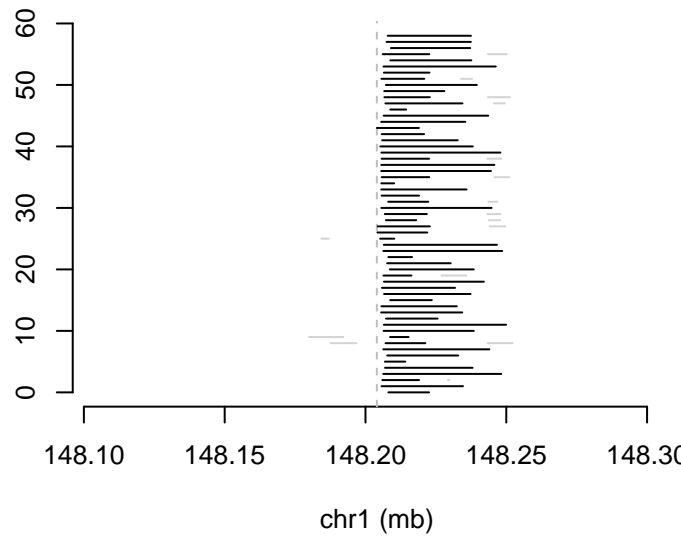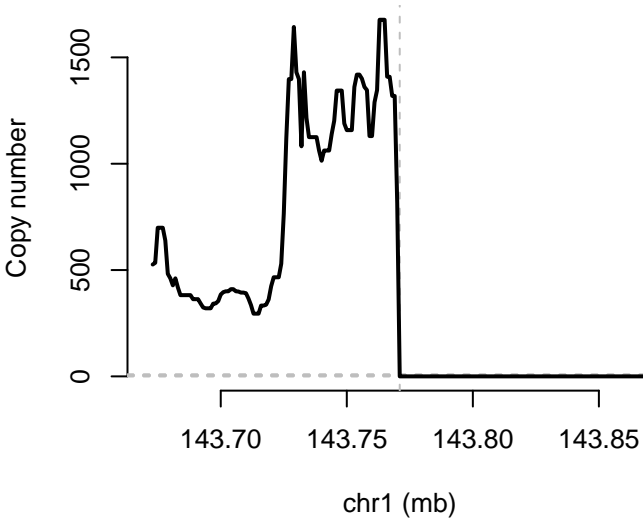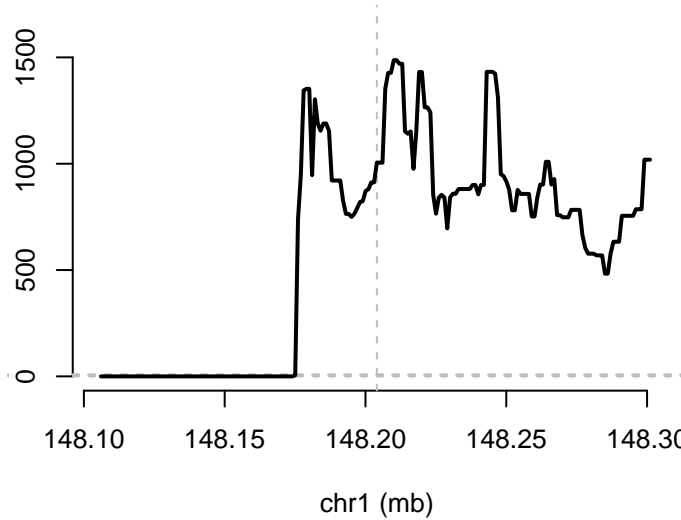

K562 chr1:148,204,049::chr1:143,771,002-+

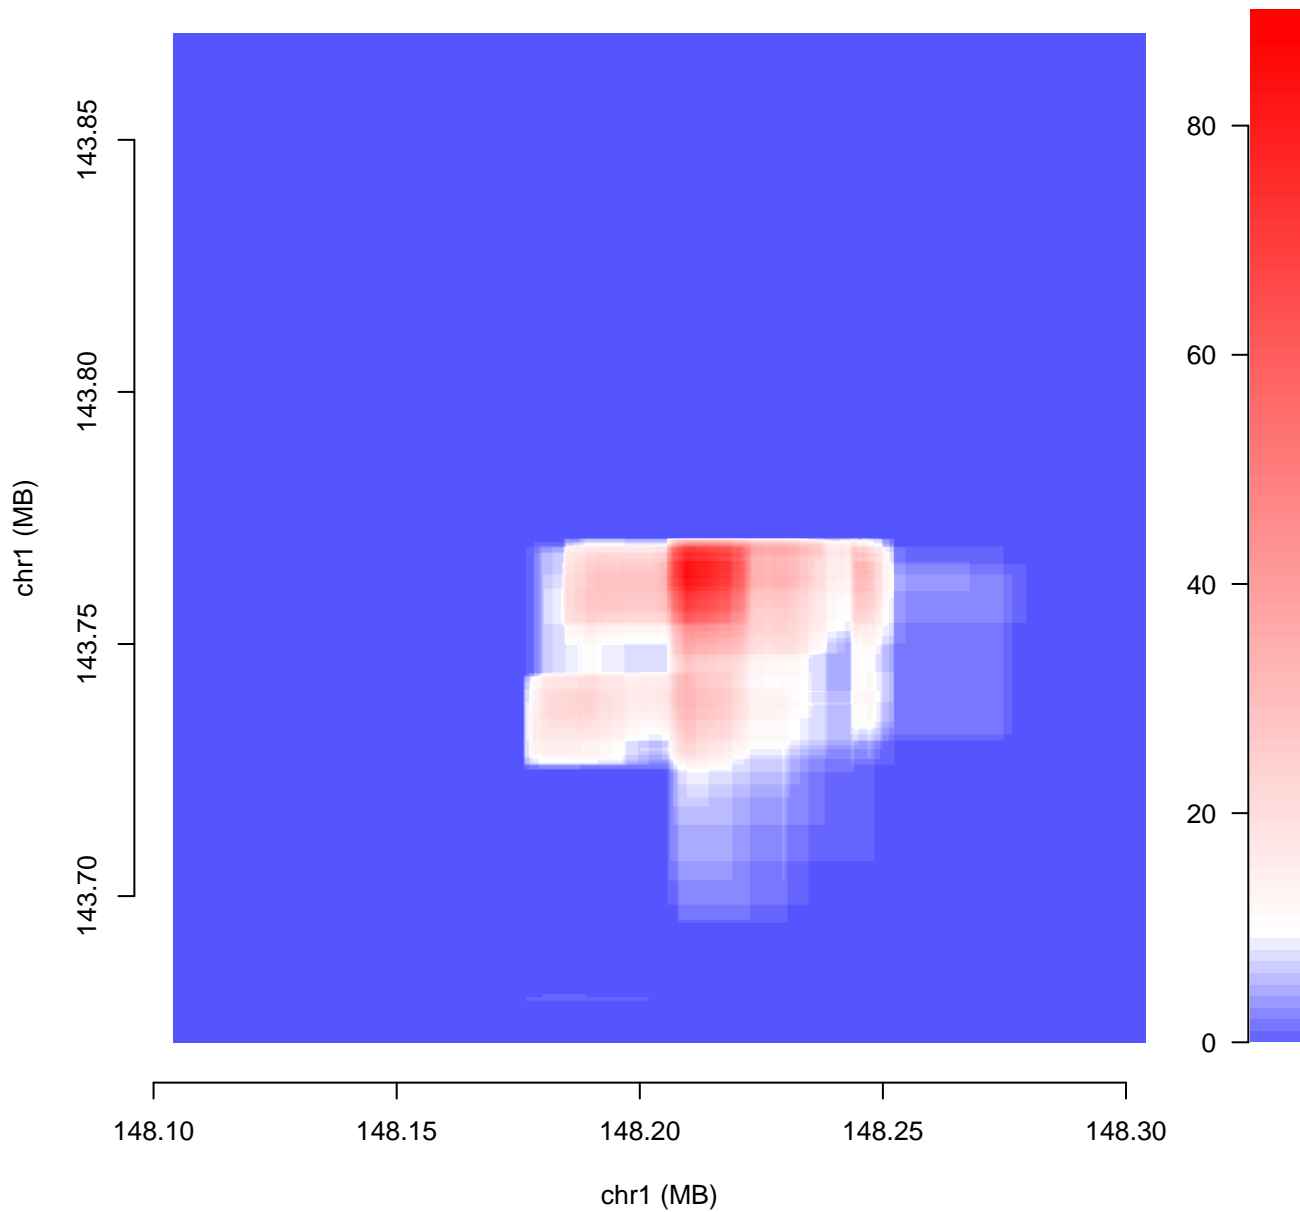

Supplement: Supplemental_Data.zip [file event_403.pdf › event_403.pdf]

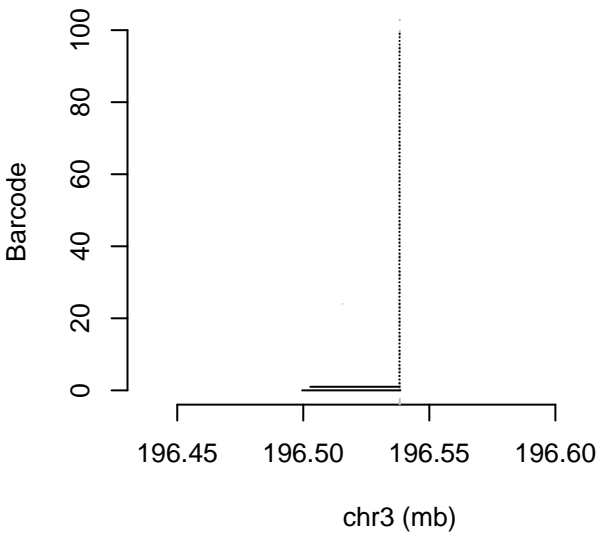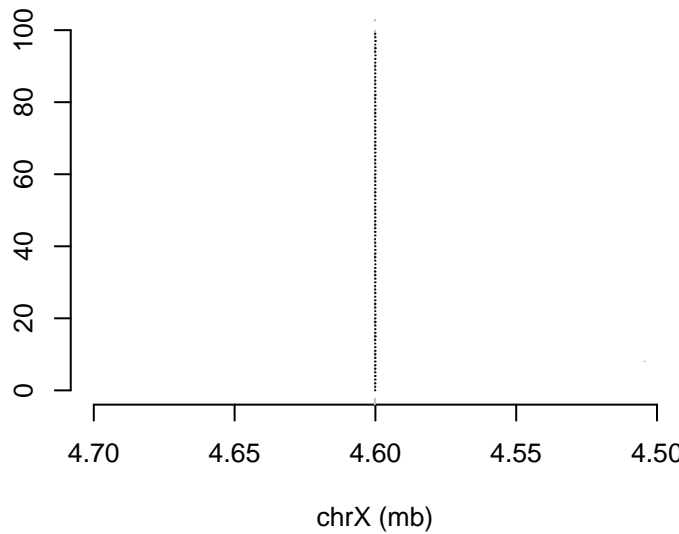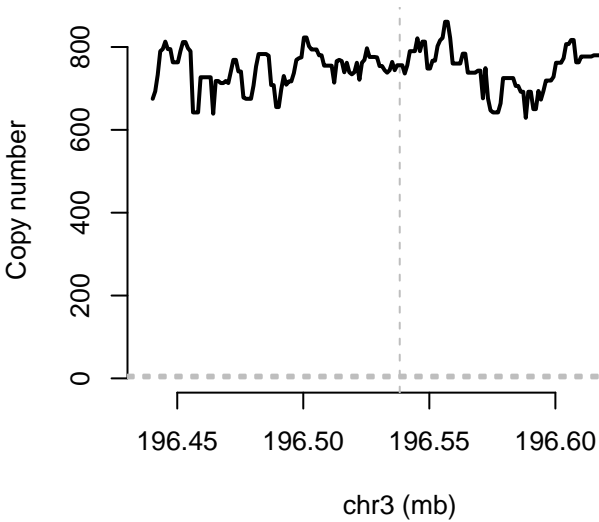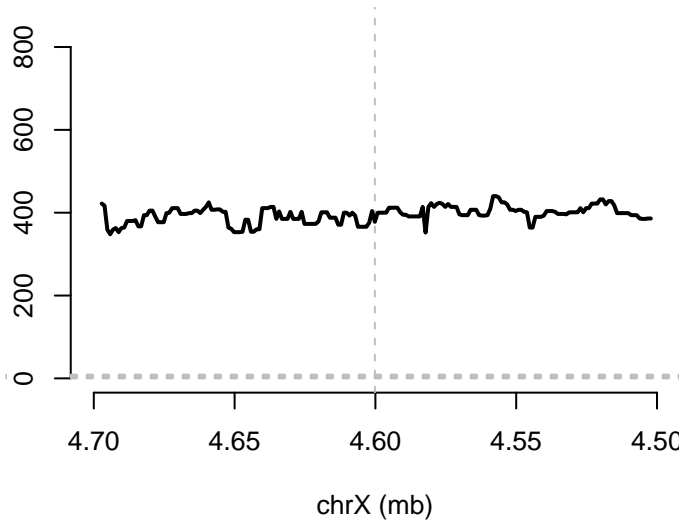

K562 chr3:196,538,263::chrX:4,600,189++

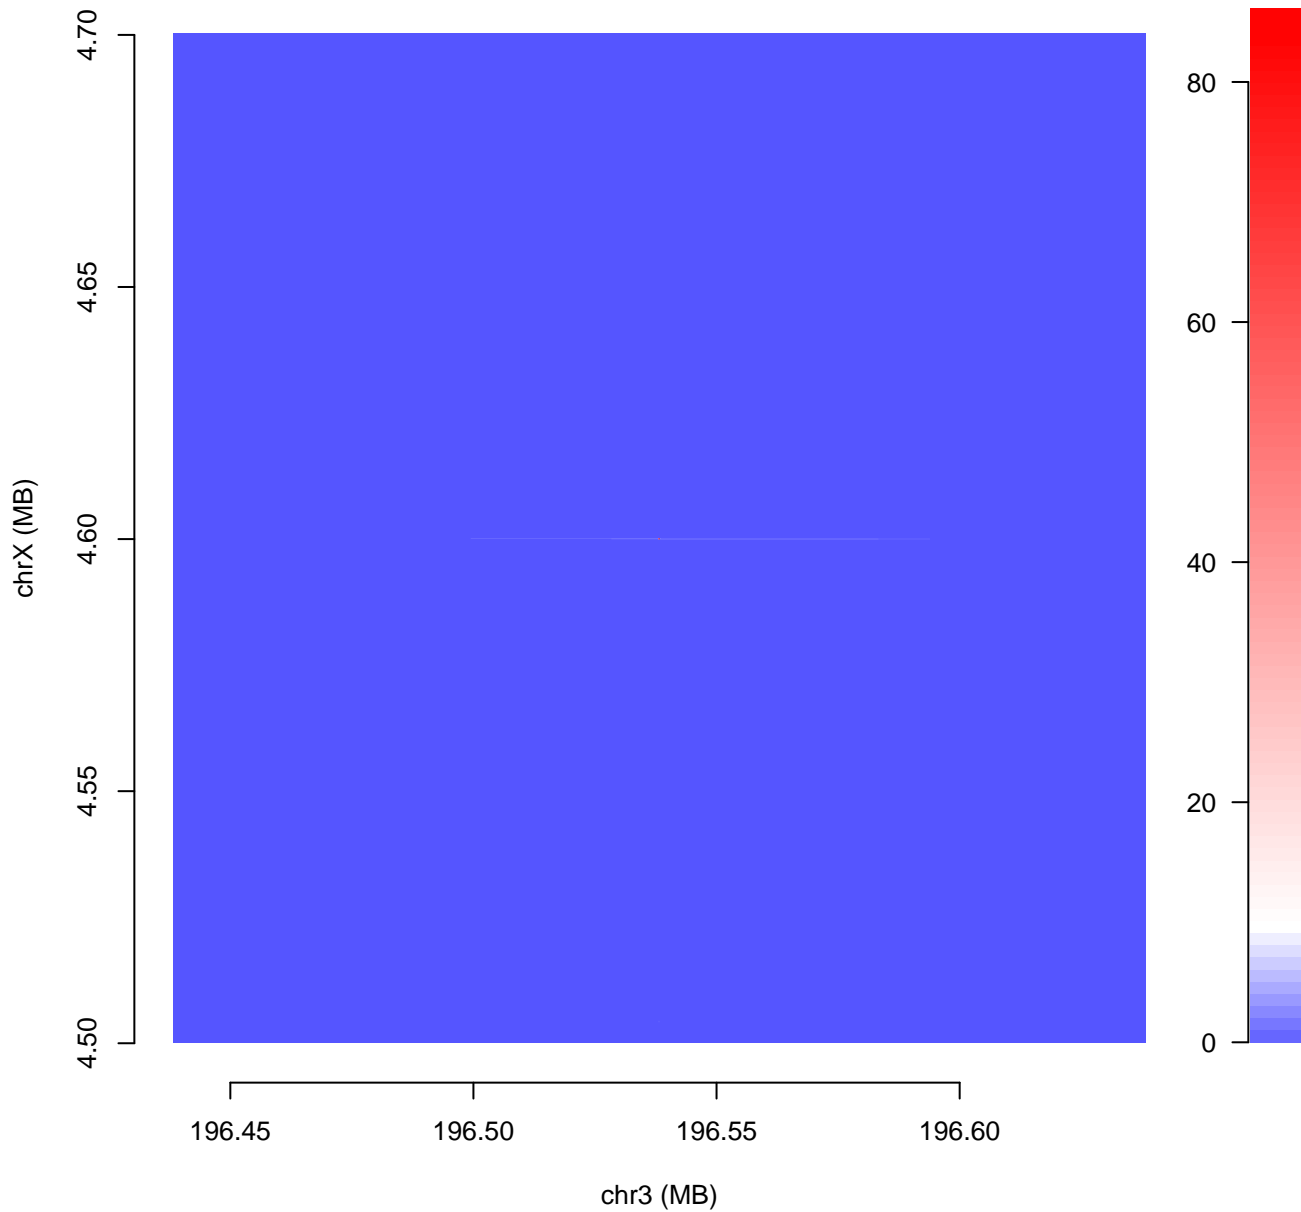

Supplement: Supplemental_Data.zip [file event_404.pdf › event_404.pdf]

Barcode

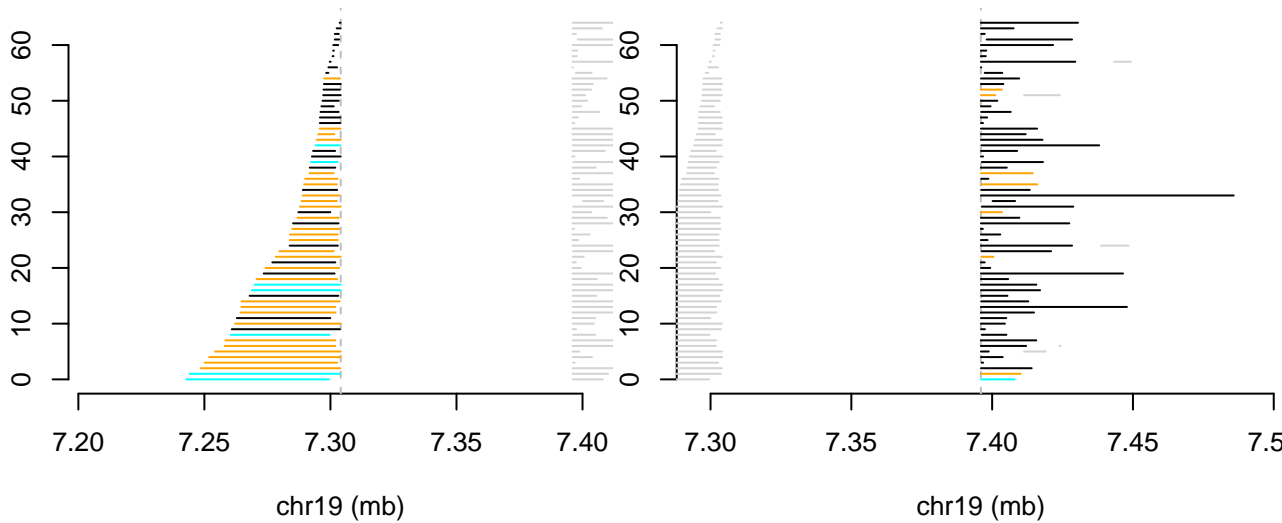

Copy number

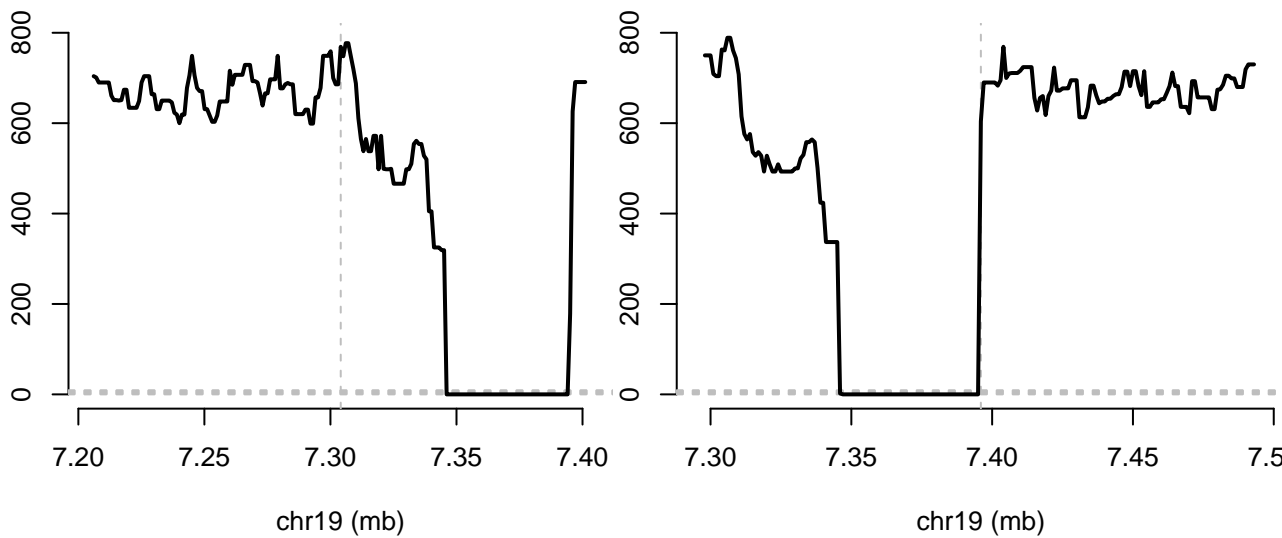

K562 chr19:7,304,089::chr19:7,395,999+-

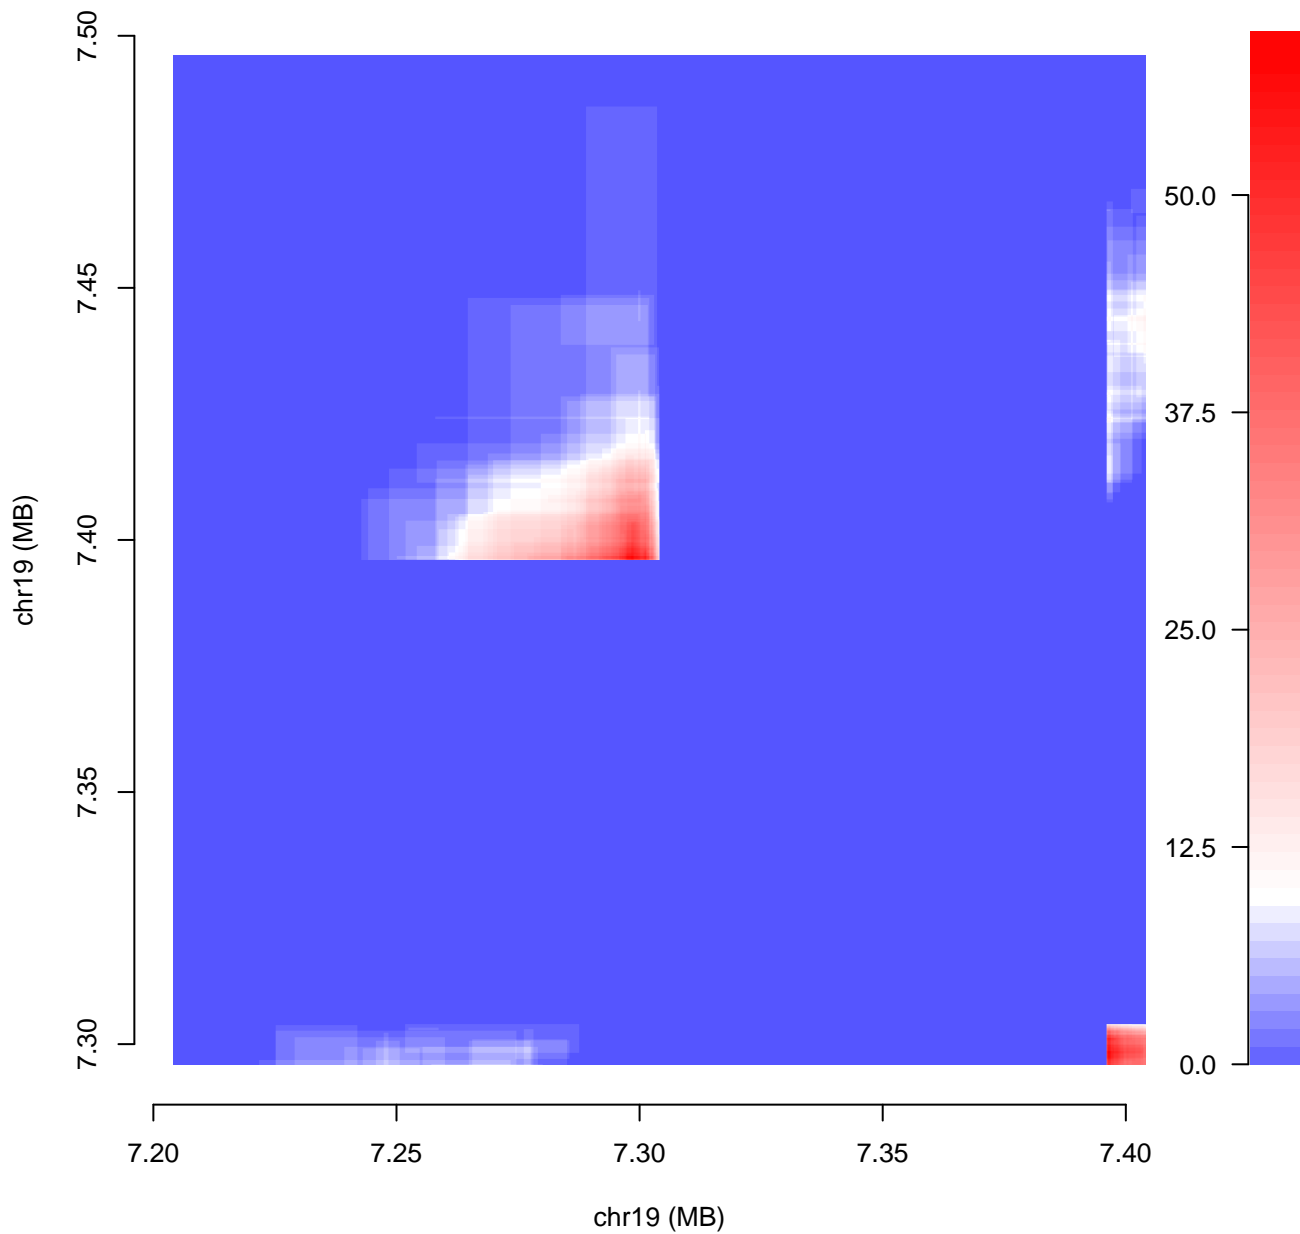

Supplement: Supplemental_Data.zip [file event_405.pdf › event_405.pdf]

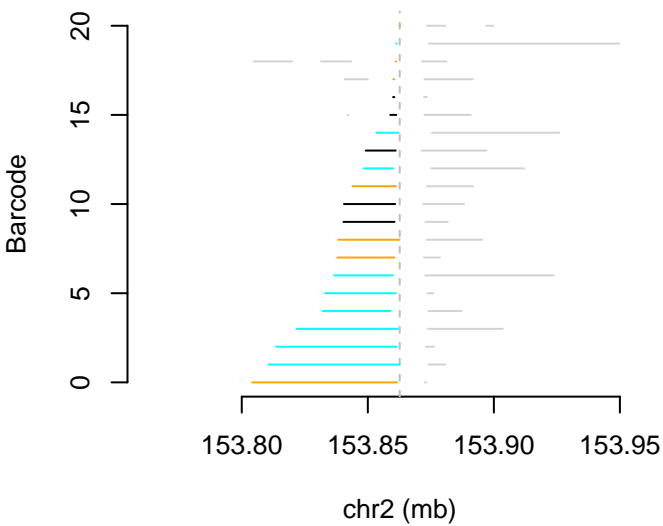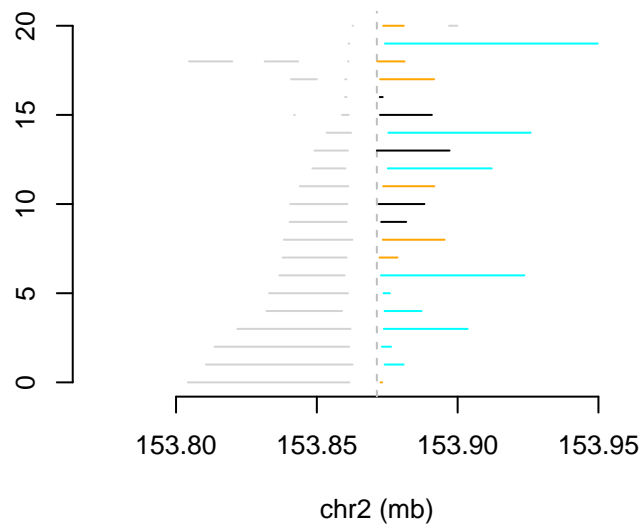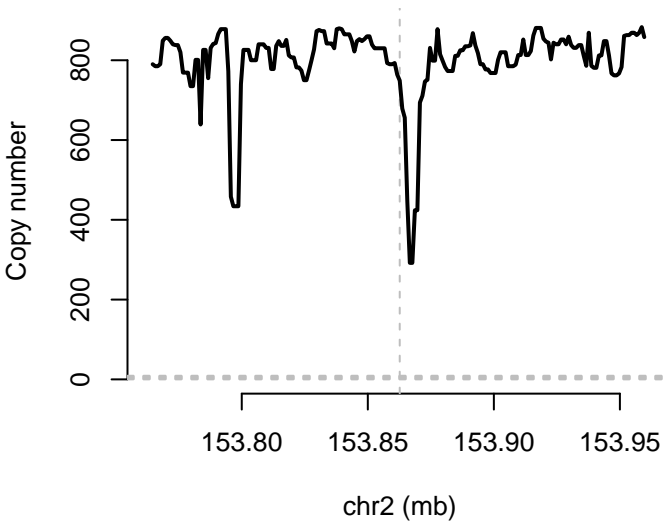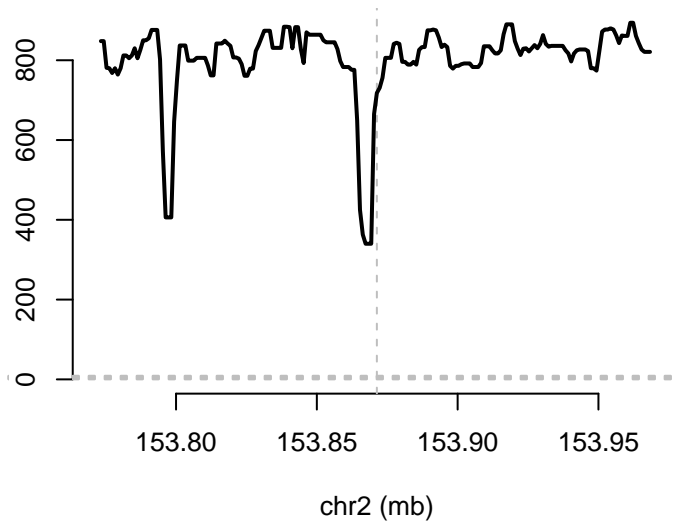

K562 chr2:153,862,666::chr2:153,871,317+-

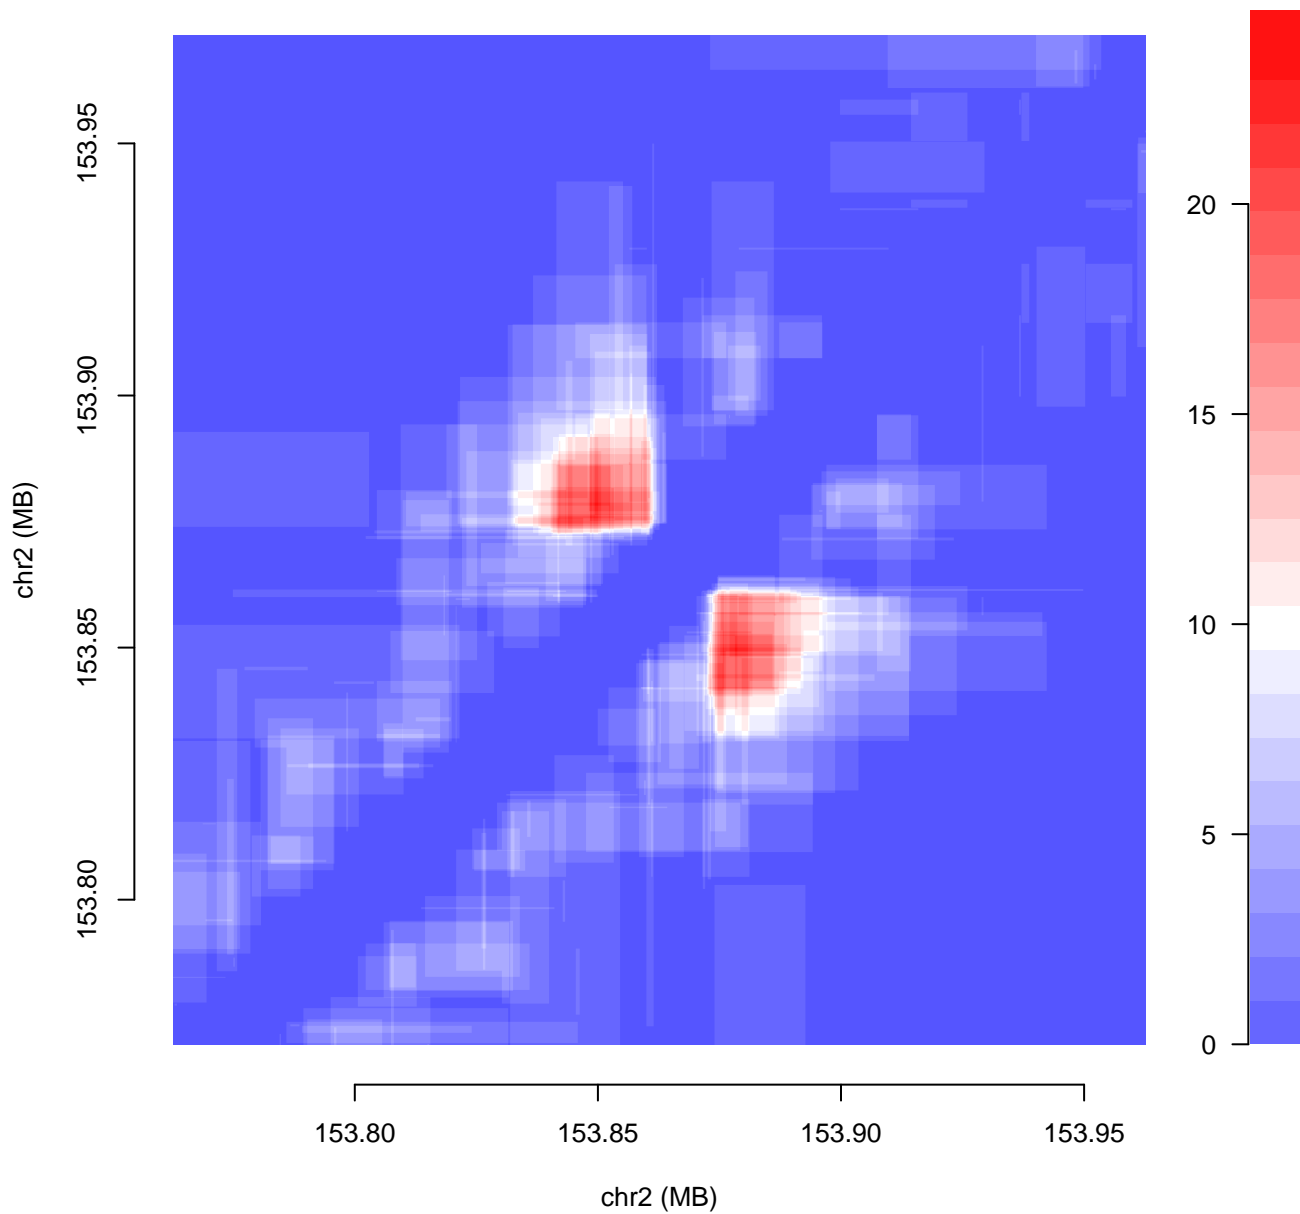

Supplement: Supplemental_Data.zip [file event_406.pdf › event_406.pdf]

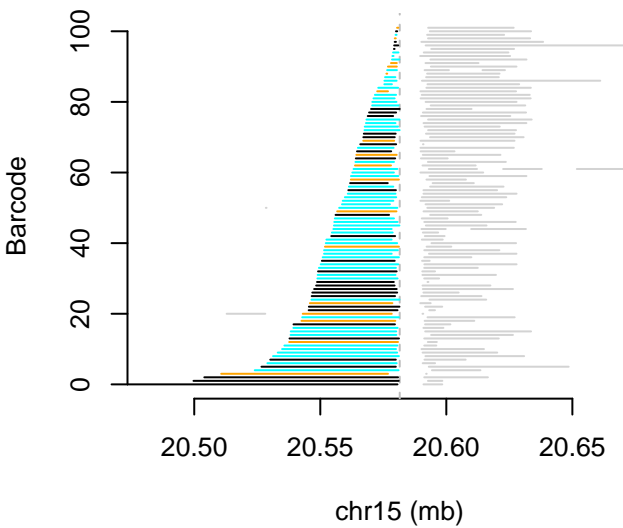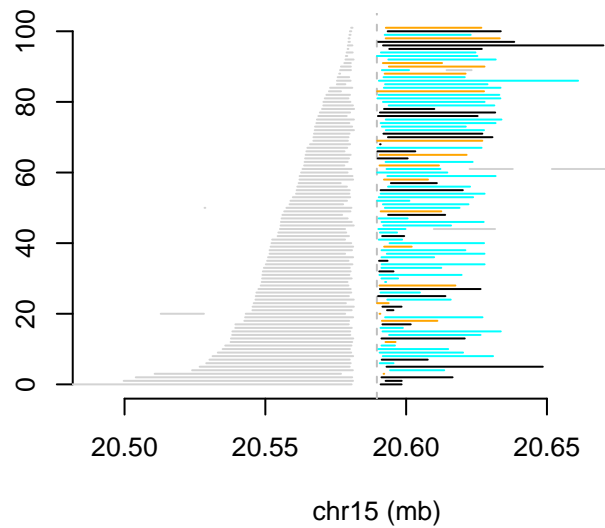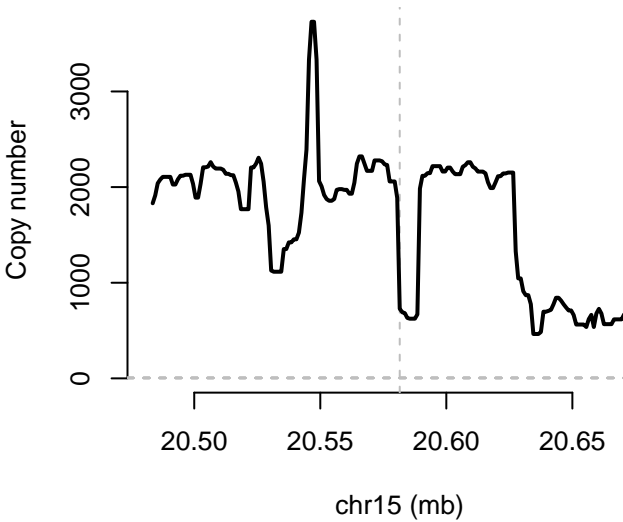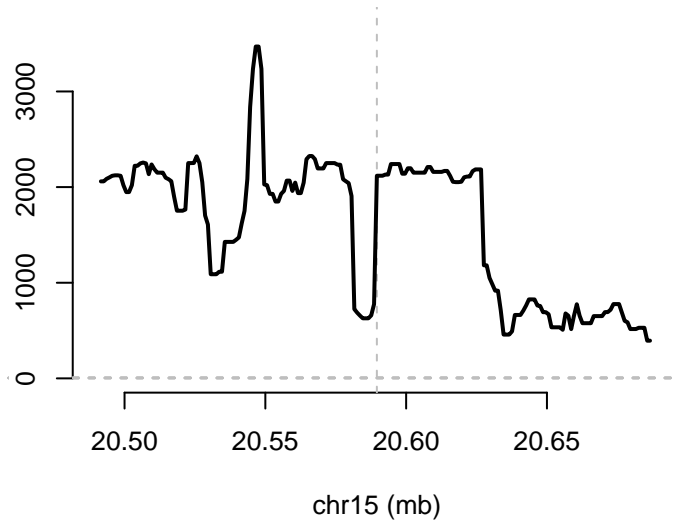

K562 chr15:20,589,604::chr15:20,581,520-+

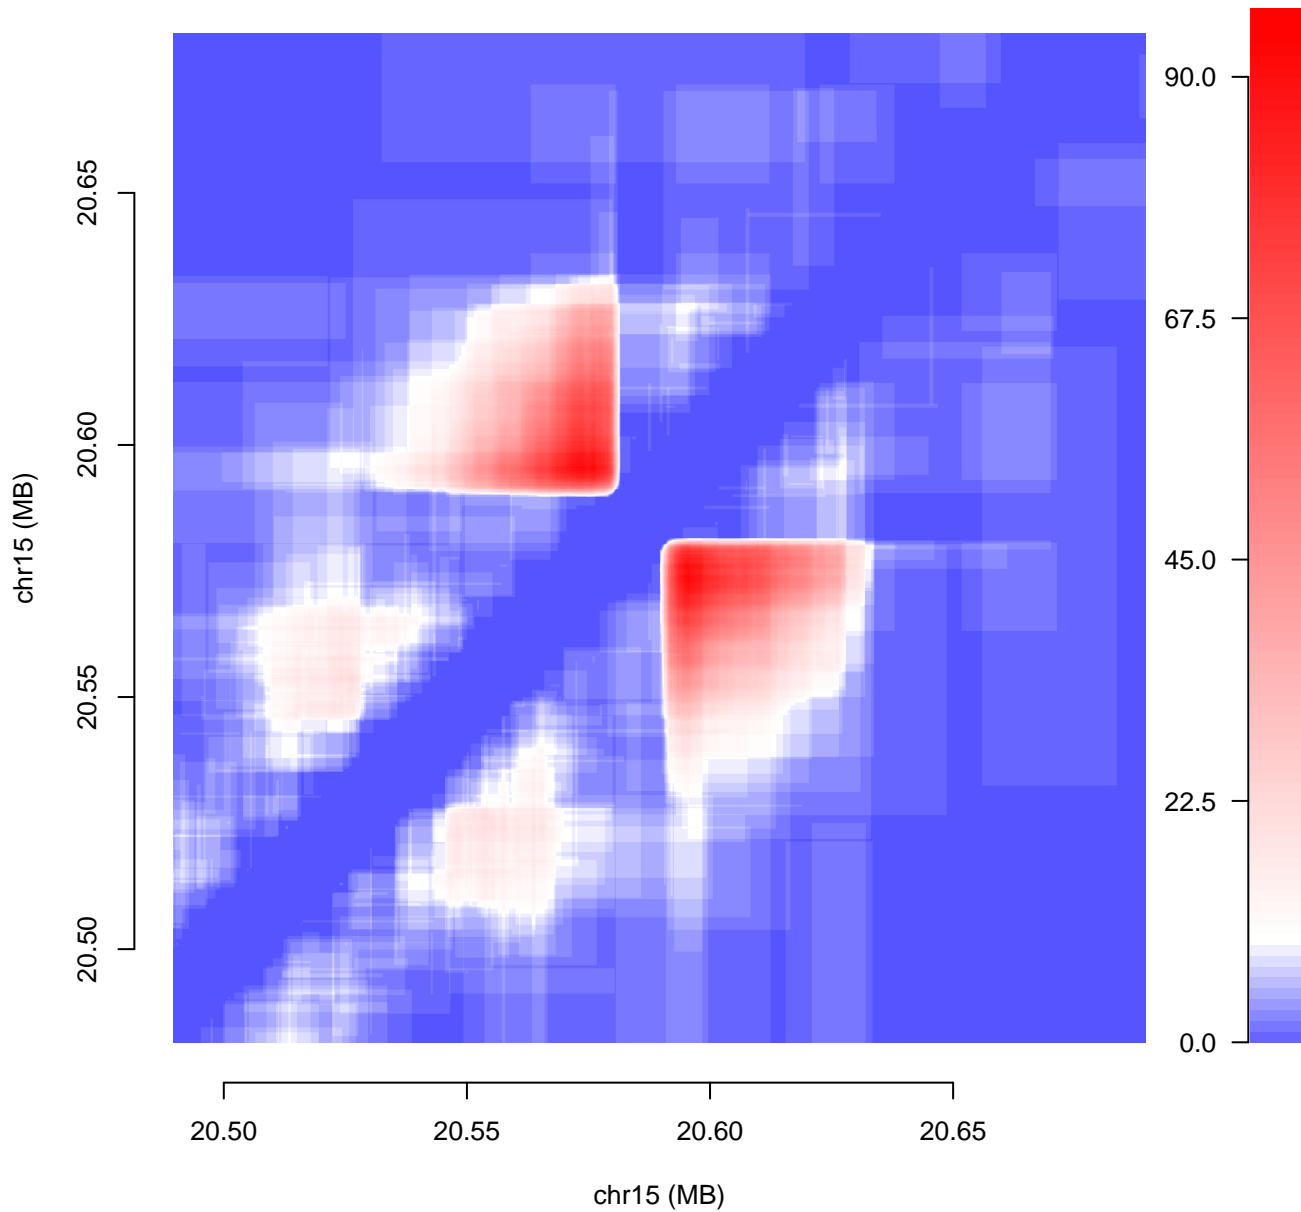

Supplement: Supplemental_Data.zip [file event_407.pdf › event_407.pdf]

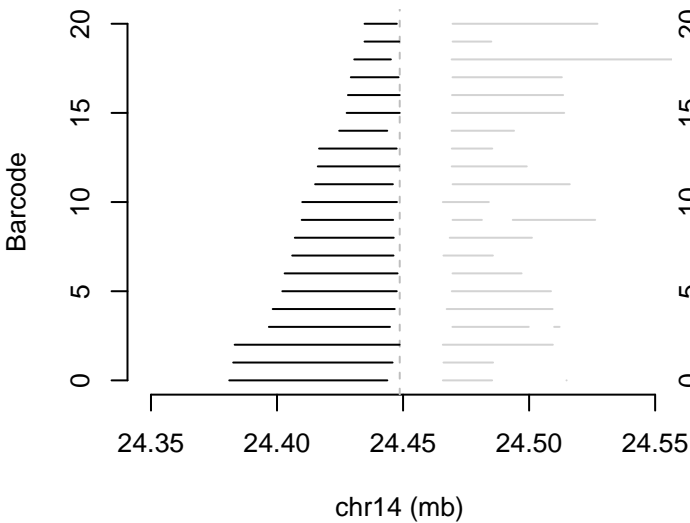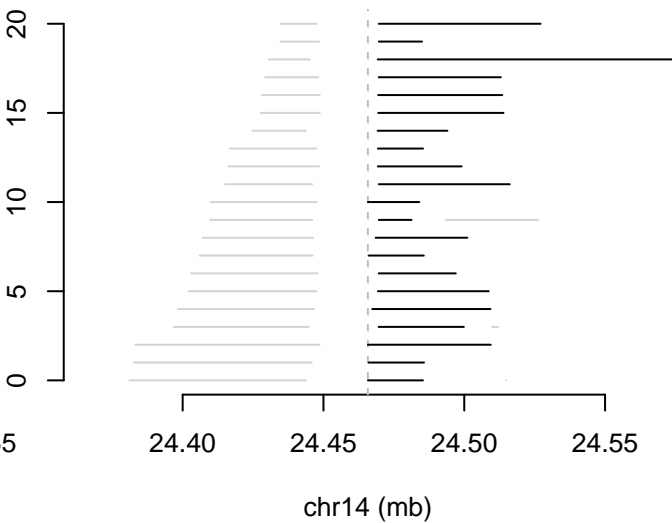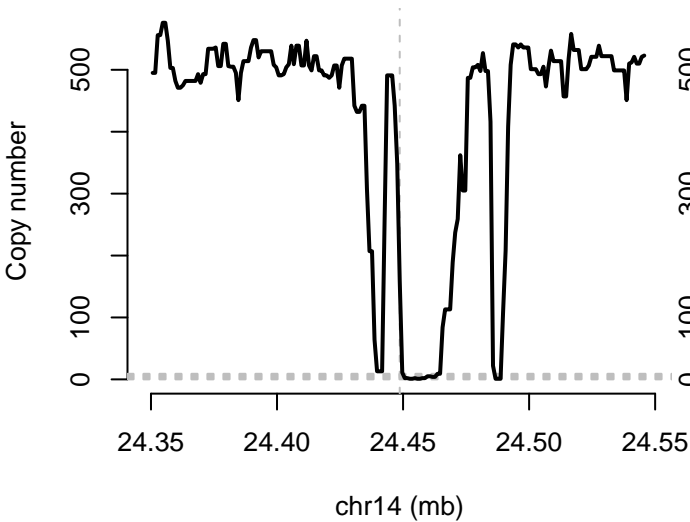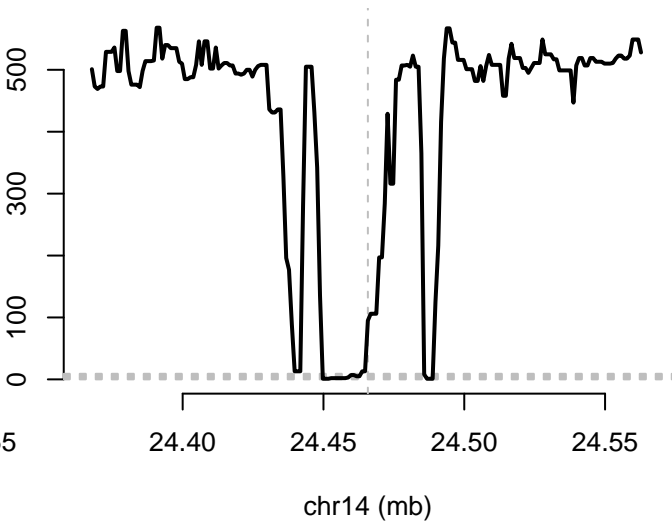

K562 chr14:24,465,767::chr14:24,448,682-+

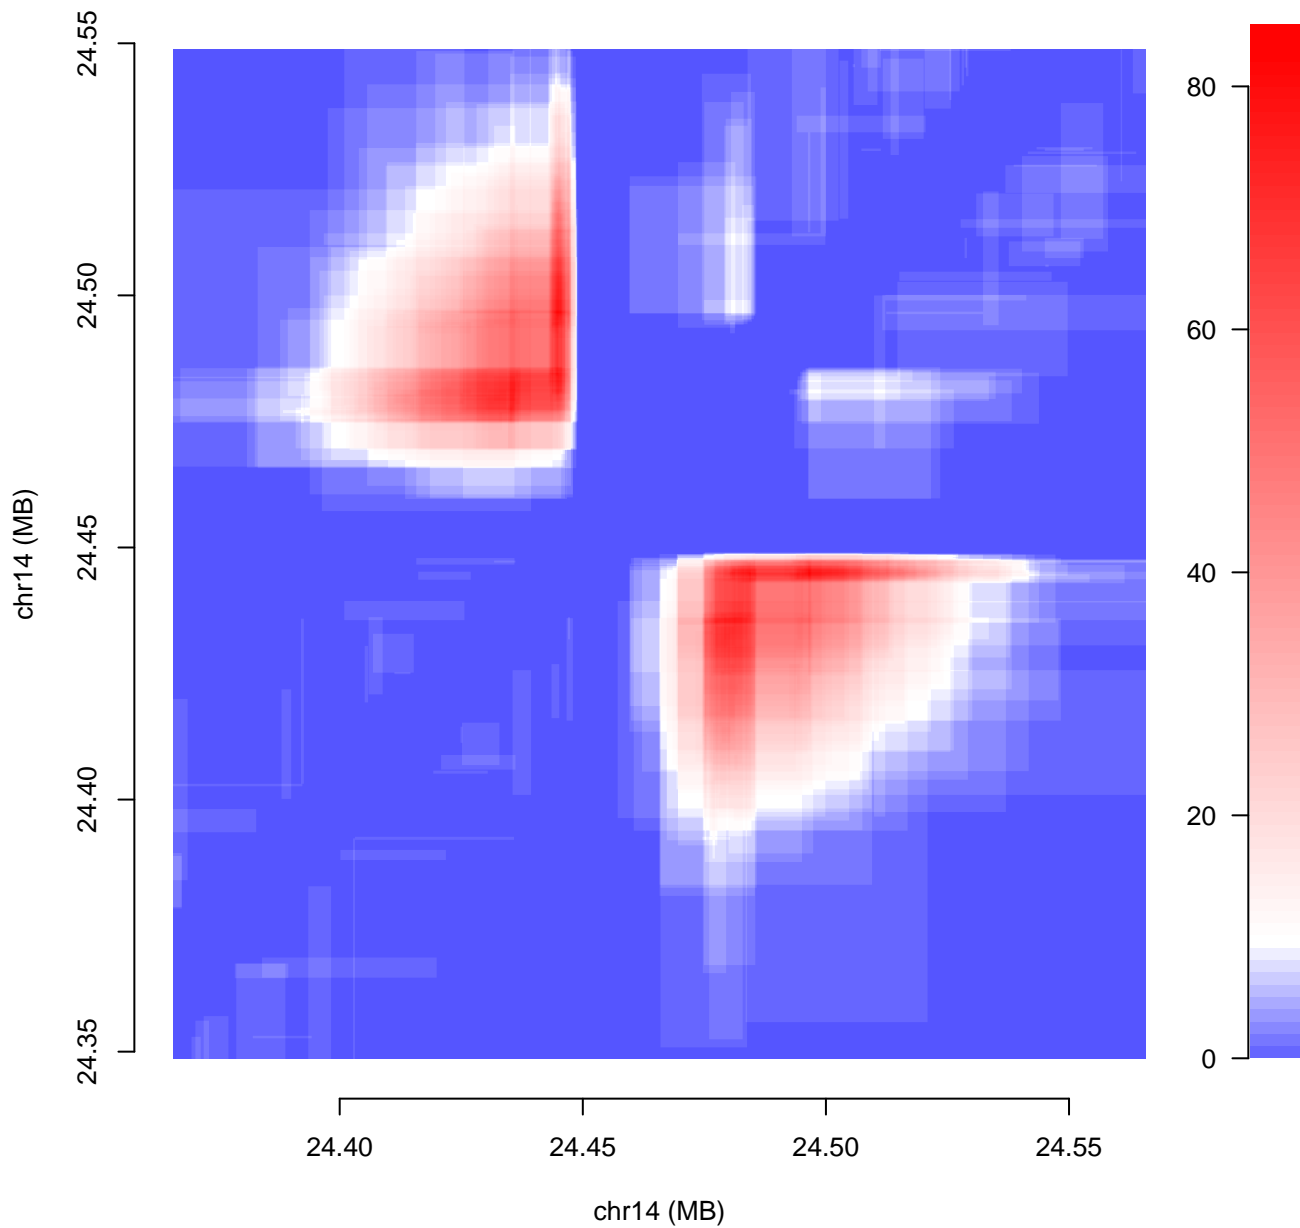

Supplement: Supplemental_Data.zip [file event_408.pdf › event_408.pdf]

Barcode

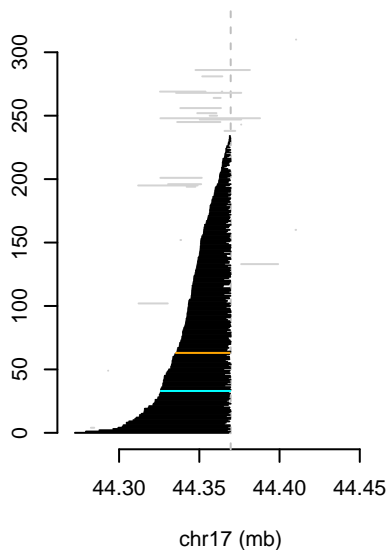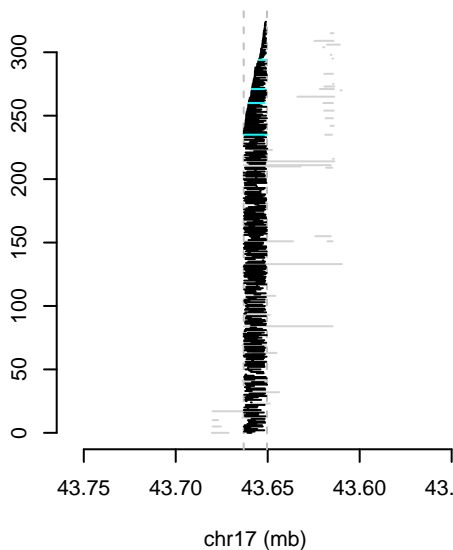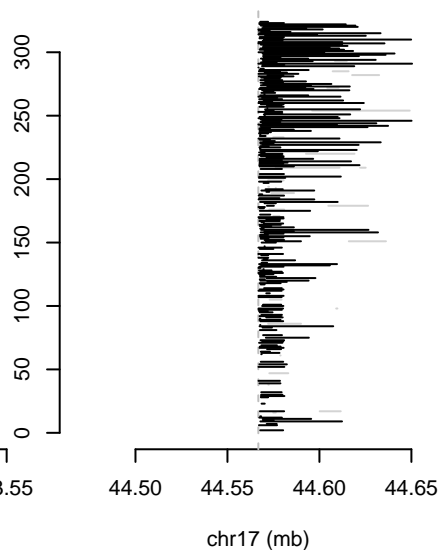

Copy number

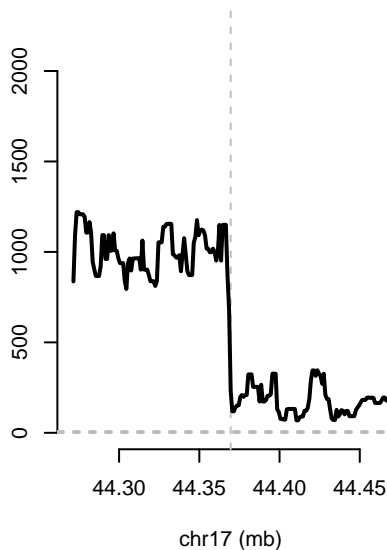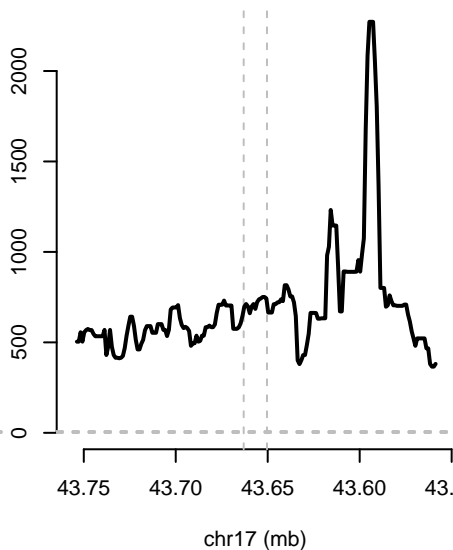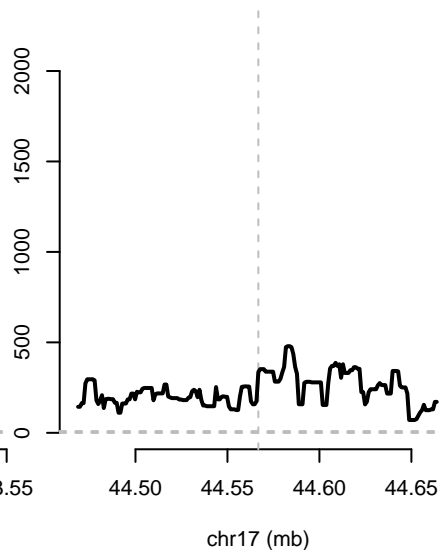

K562 chr17:43,663,061::chr17:44,369,546++

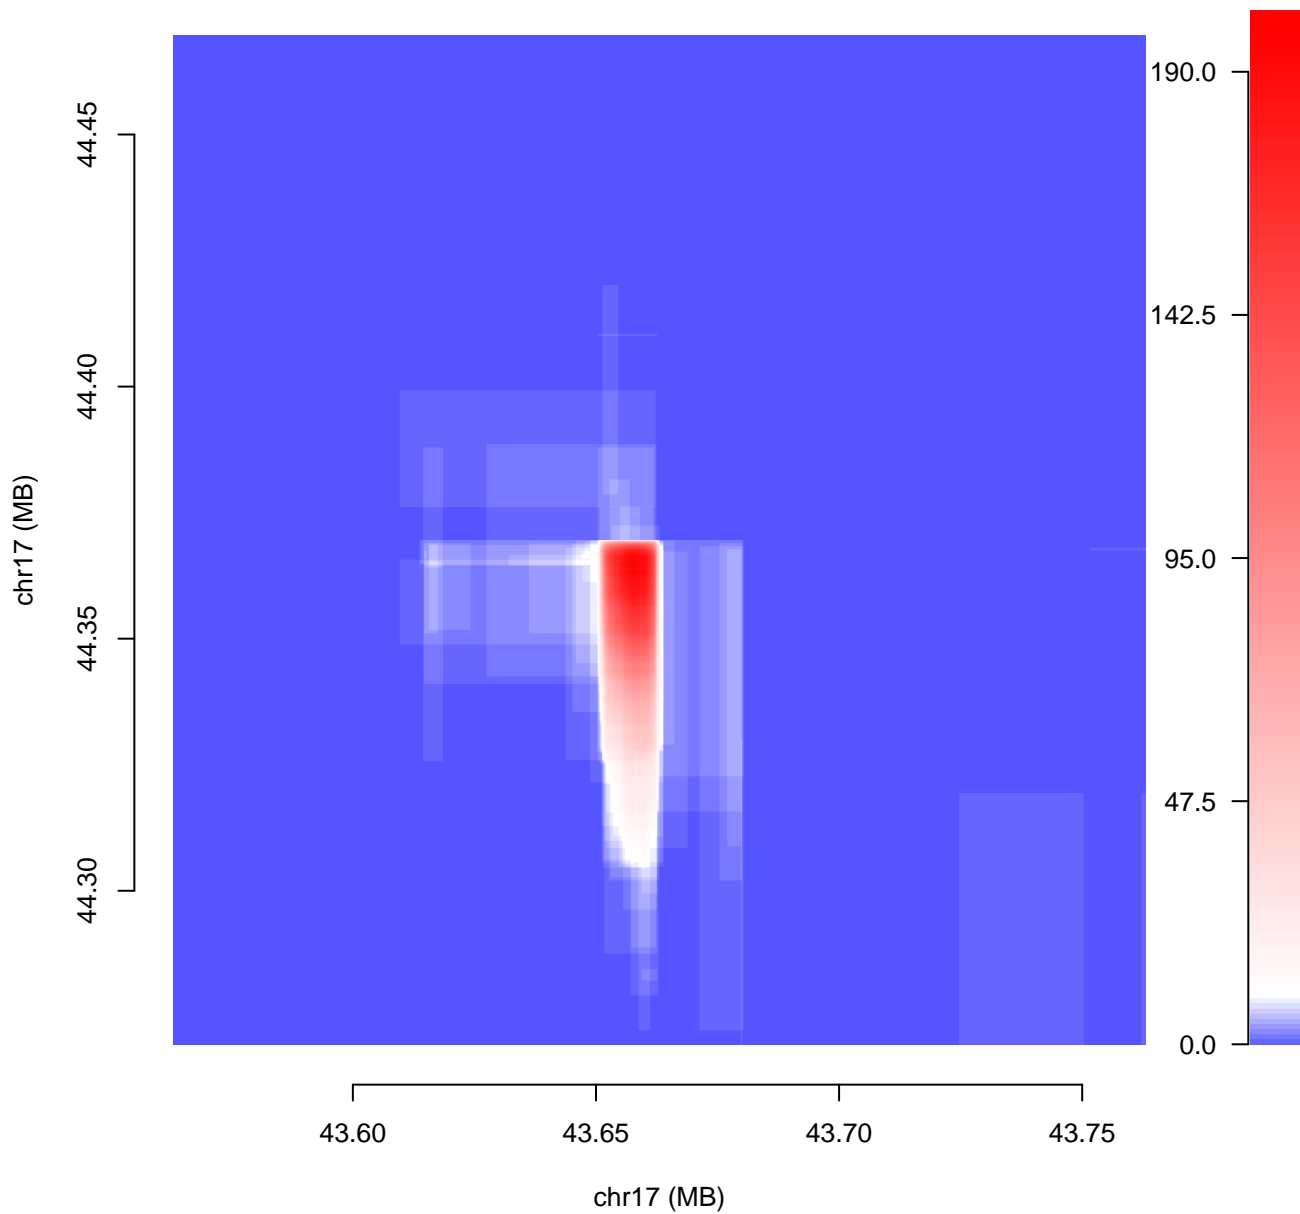

K562 chr17:43,663,061::chr17:43,650,392+-

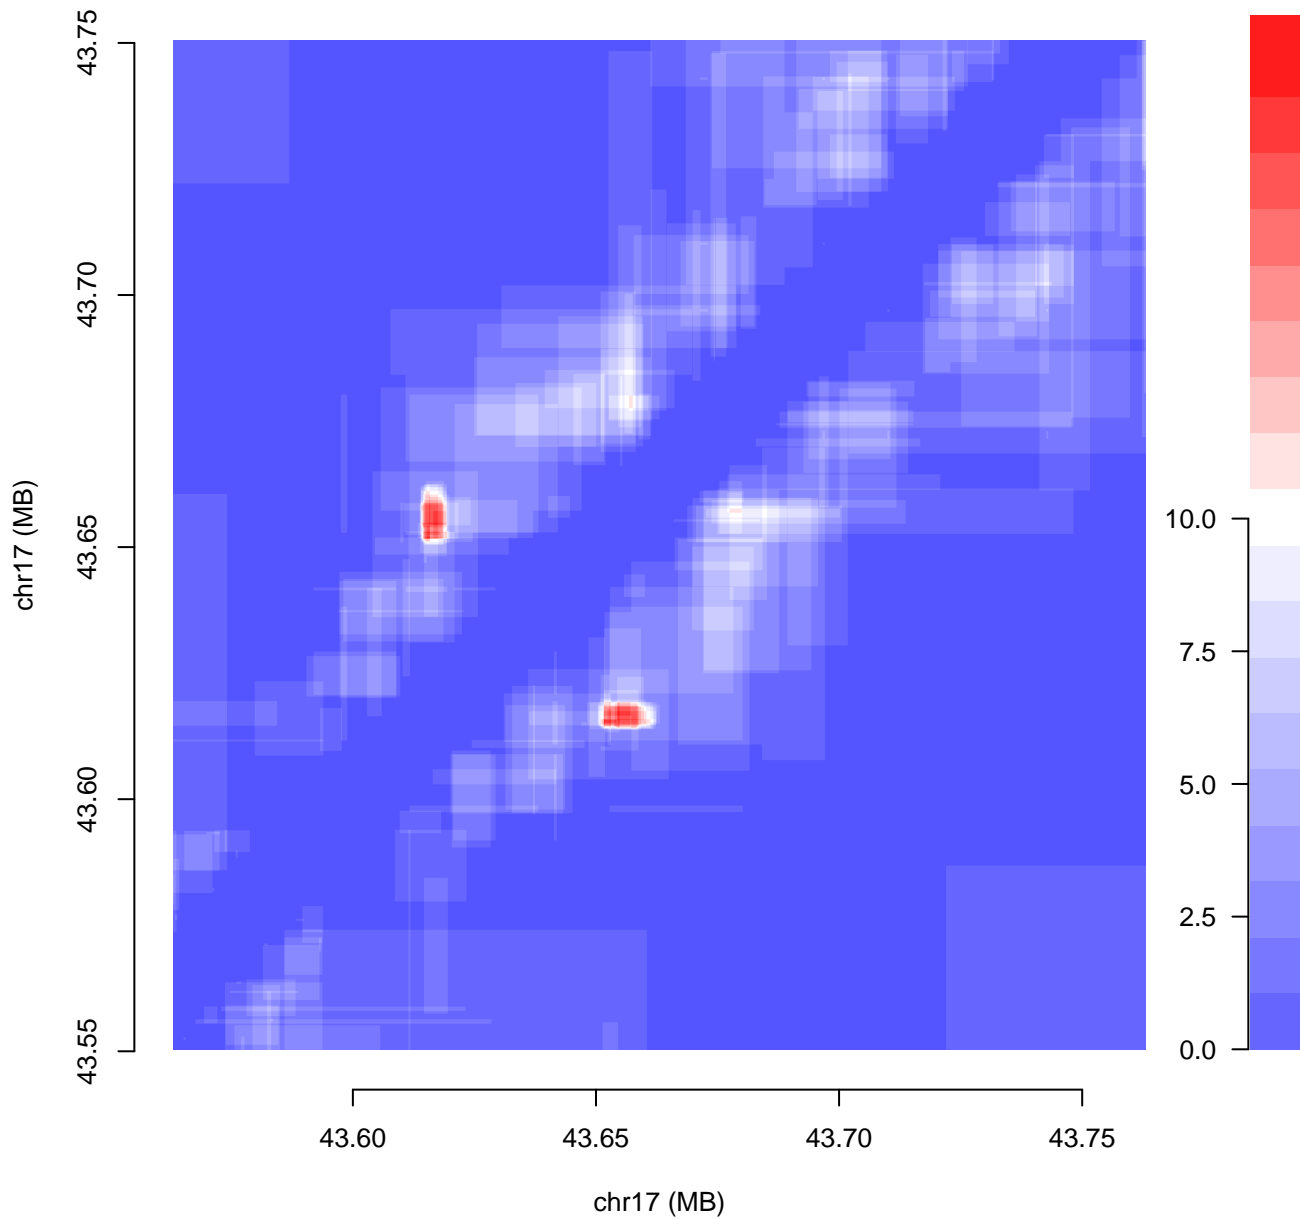

K562 chr17:43,650,392::chr17:44,566,789--

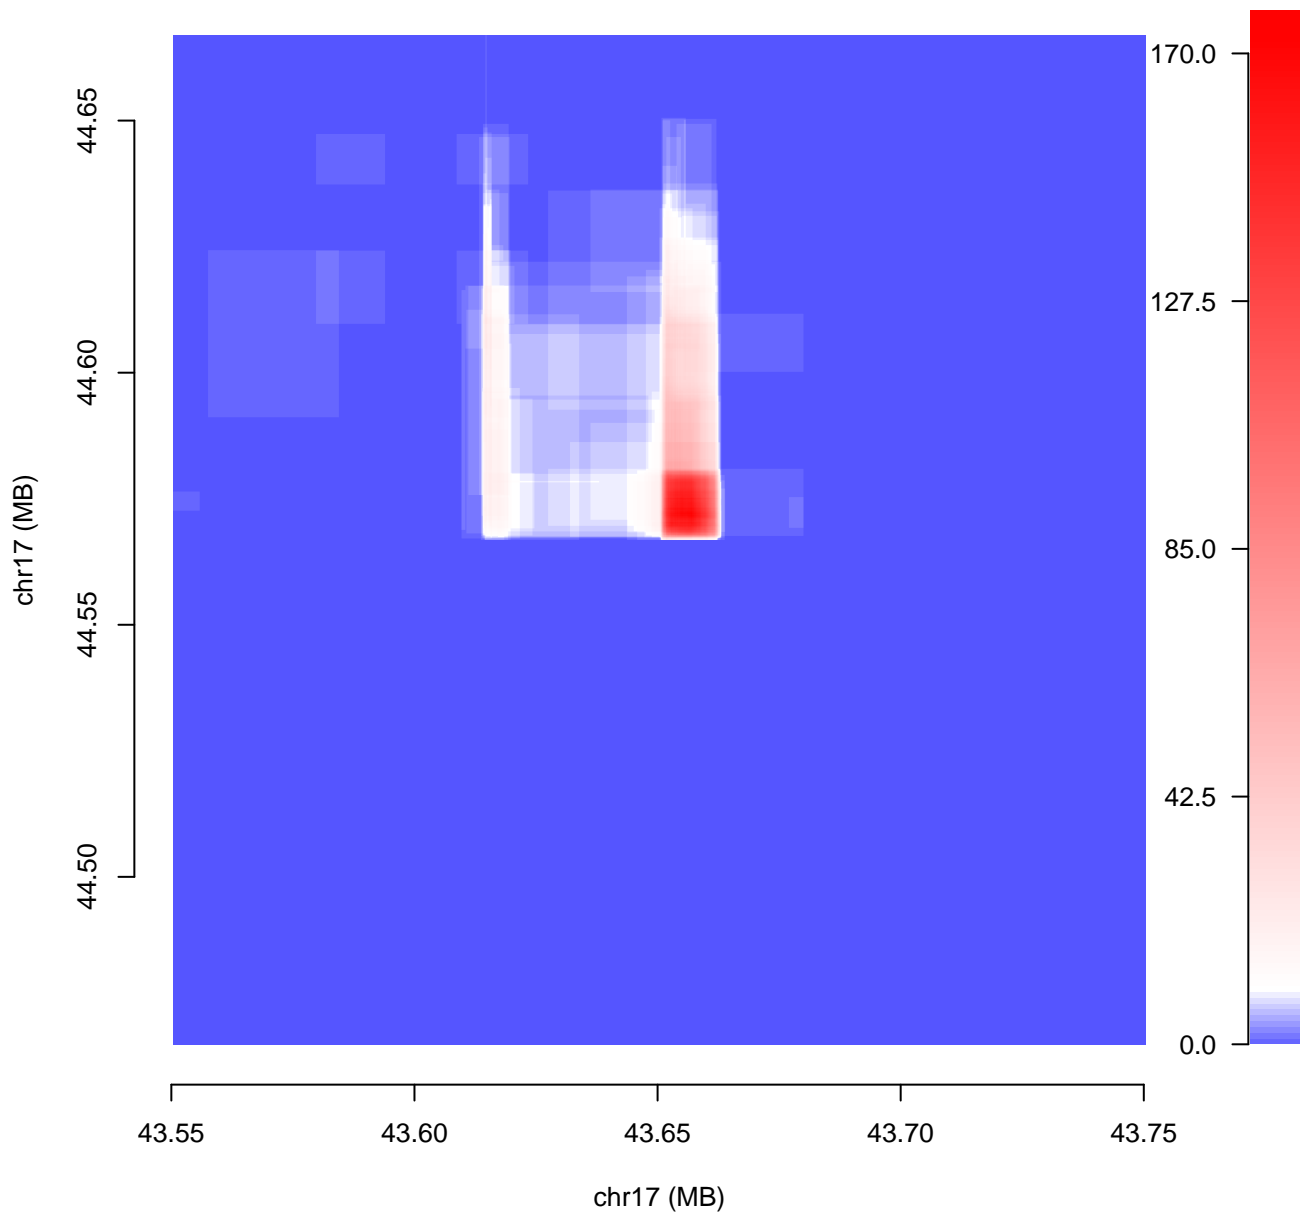

Supplement: Supplemental_Data.zip [file event_409.pdf › event_409.pdf]

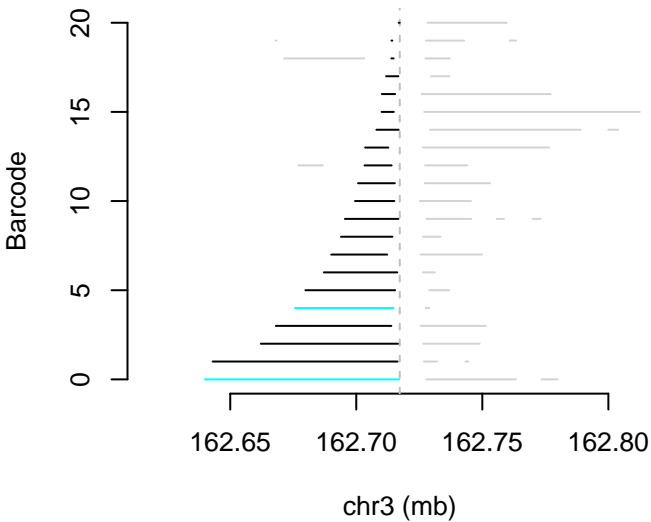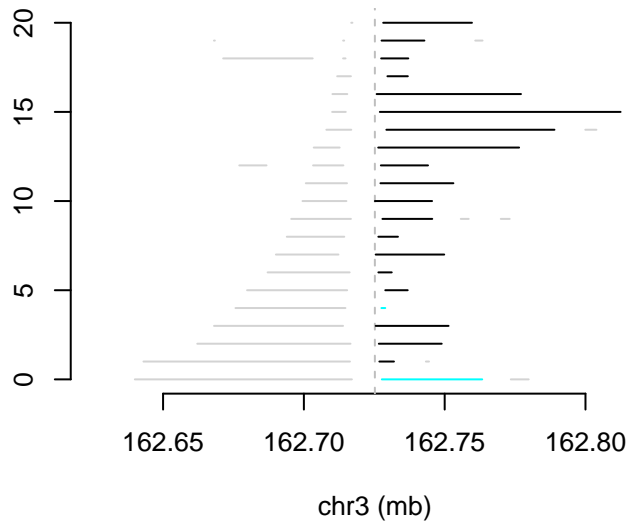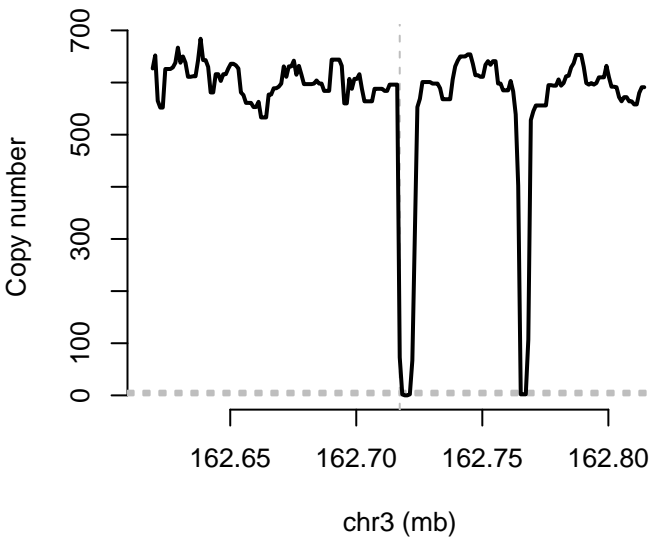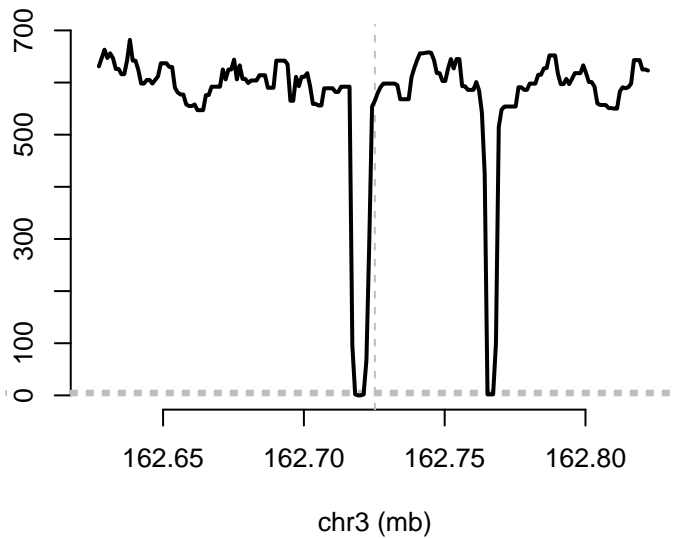

K562 chr3:162,725,214::chr3:162,717,244-+

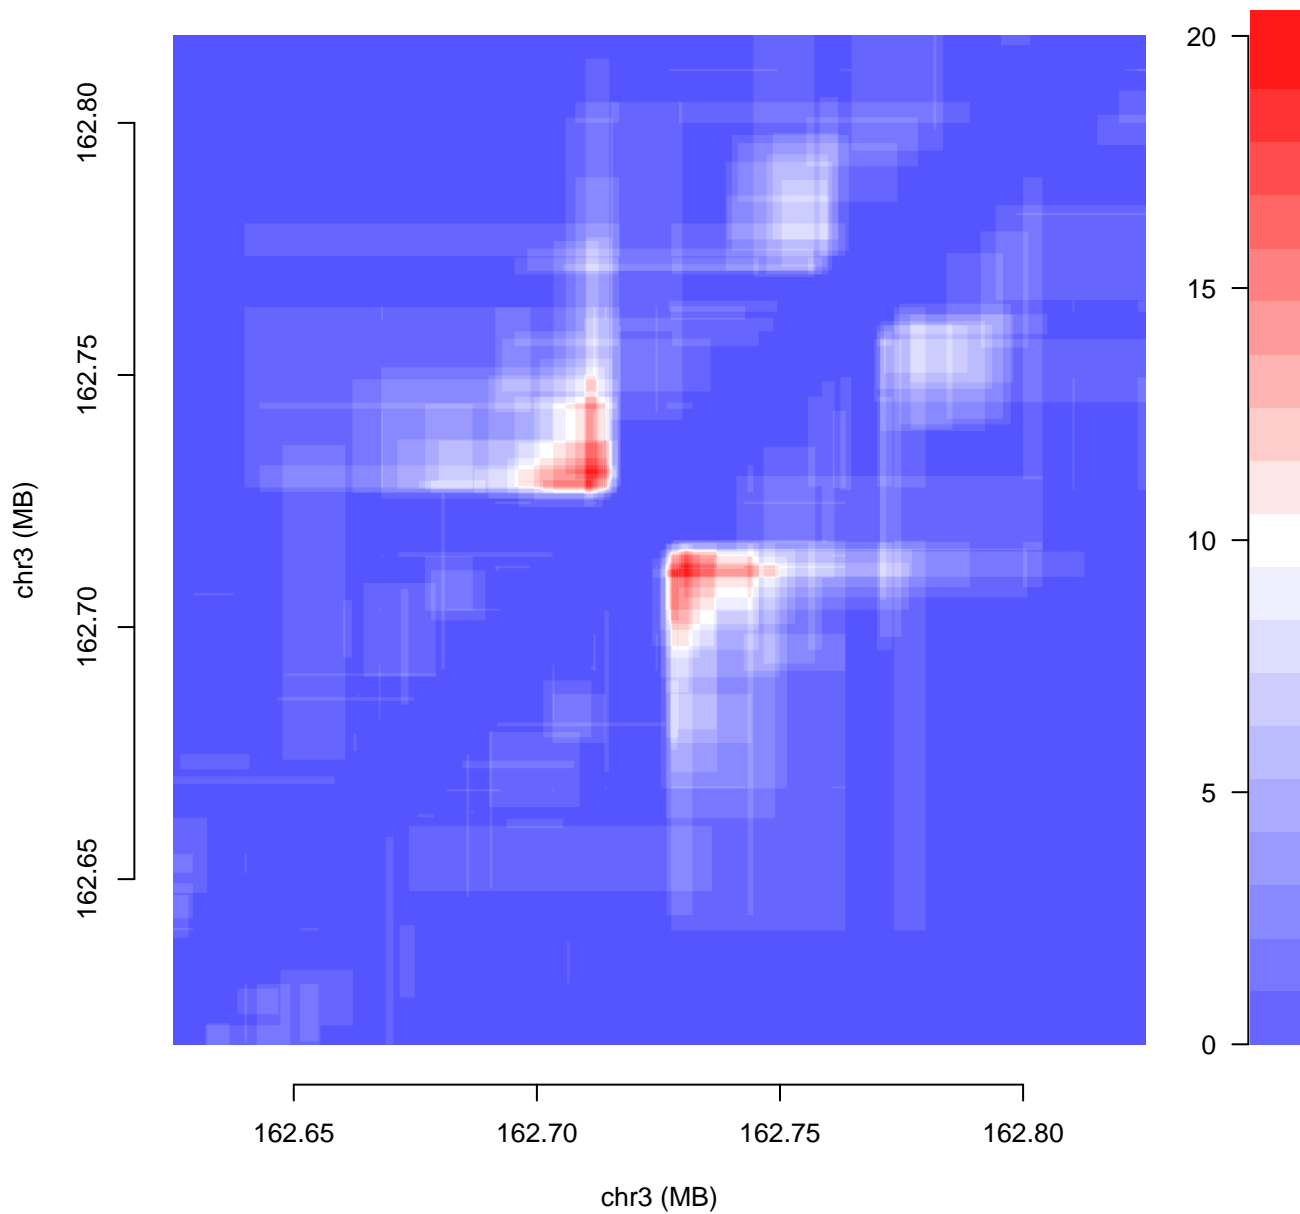

Supplement: Supplemental_Data.zip [file event_41.pdf › event_41.pdf]

Barcode

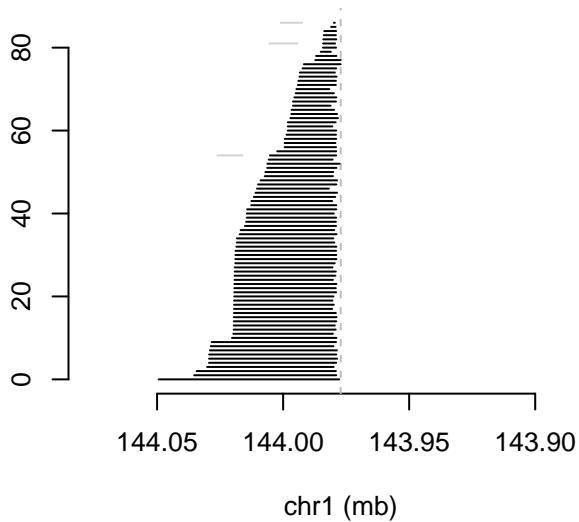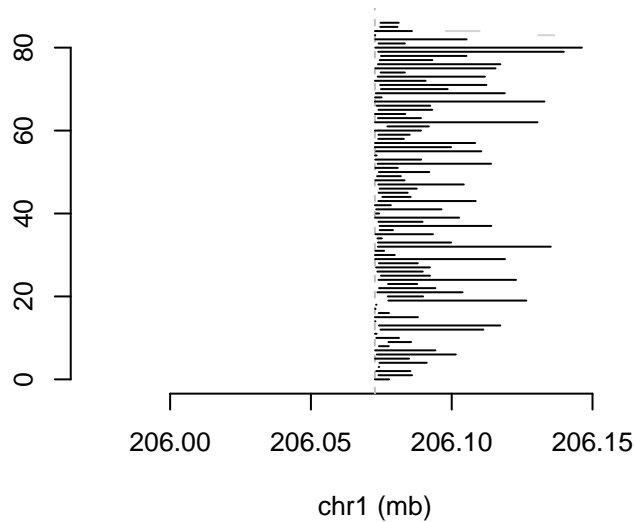

Copy number

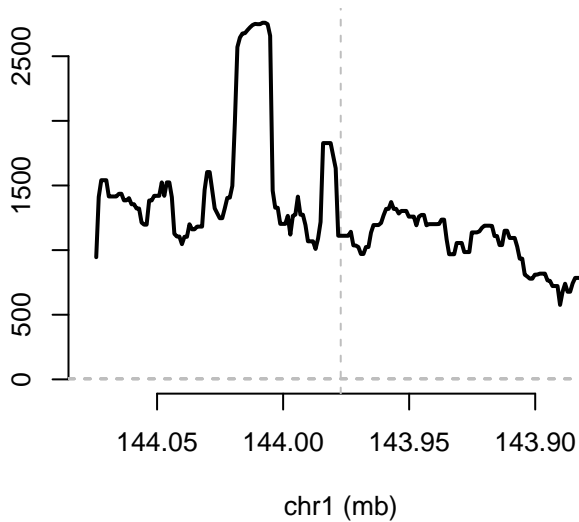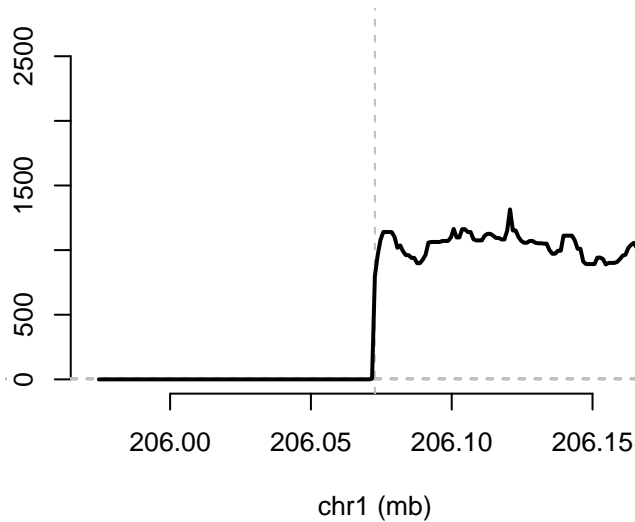

K562 chr1:143,977,143::chr1:206,072,713--

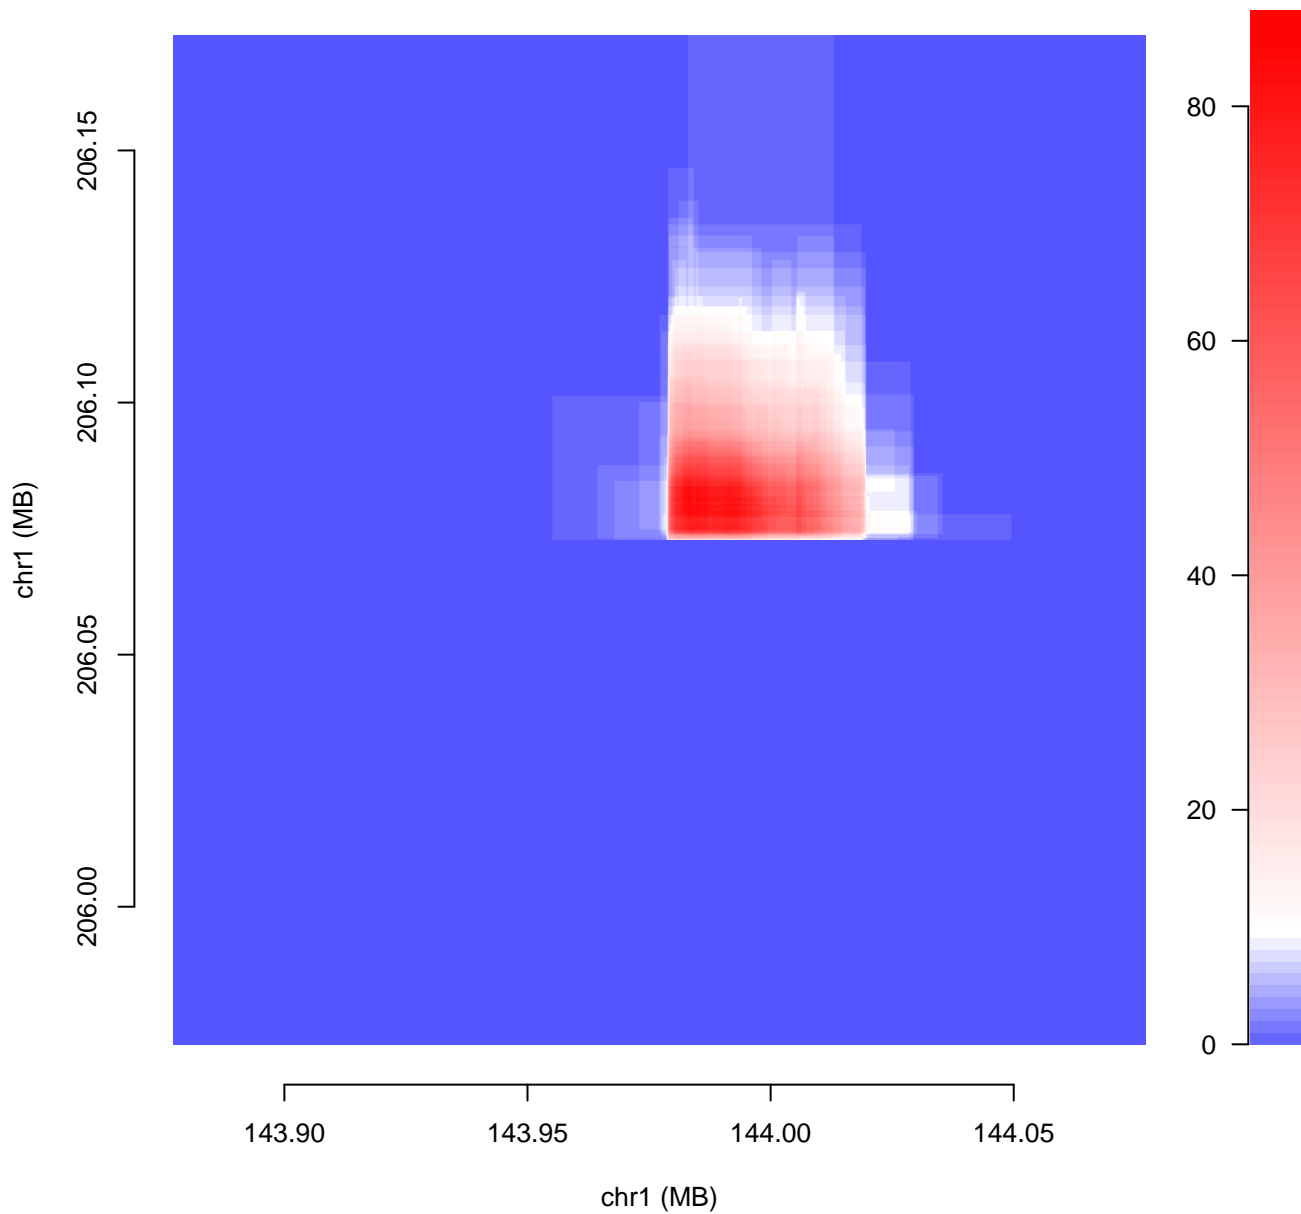

Supplement: Supplemental_Data.zip [file event_410.pdf › event_410.pdf]

Barcode

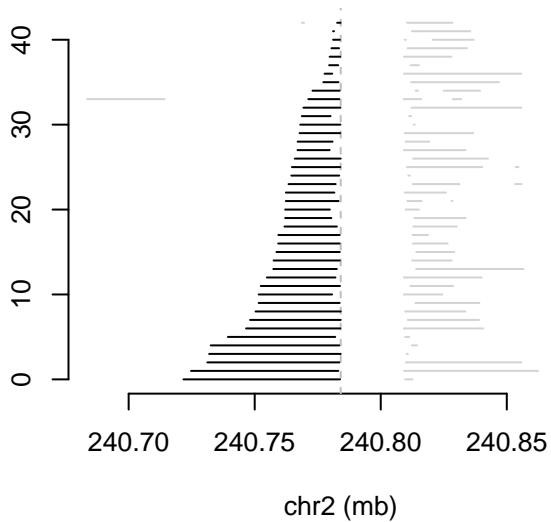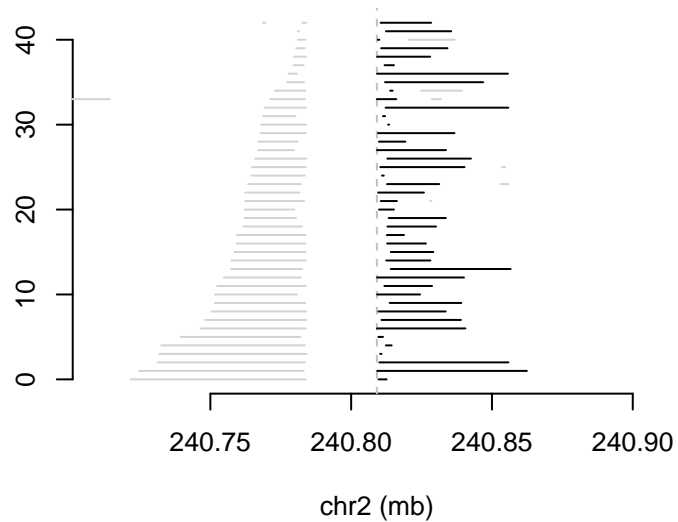

Copy number

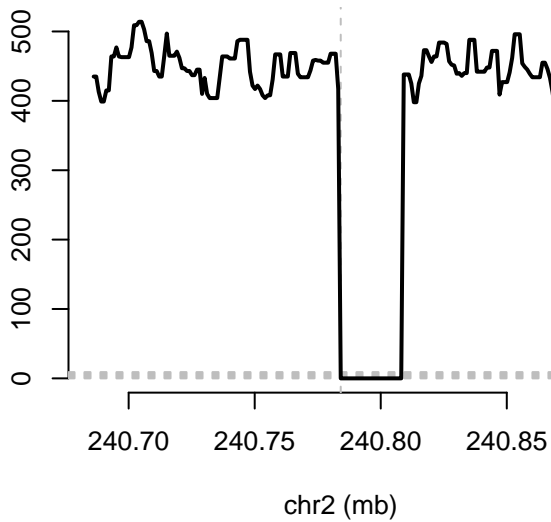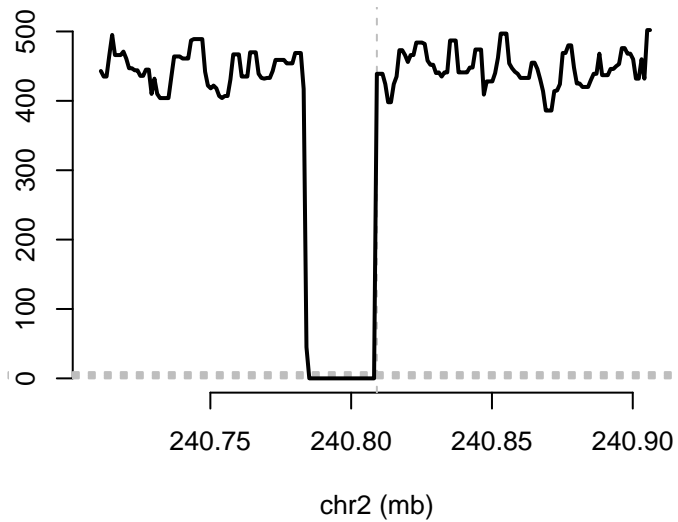

K562 chr2:240,784,132::chr2:240,809,131+-

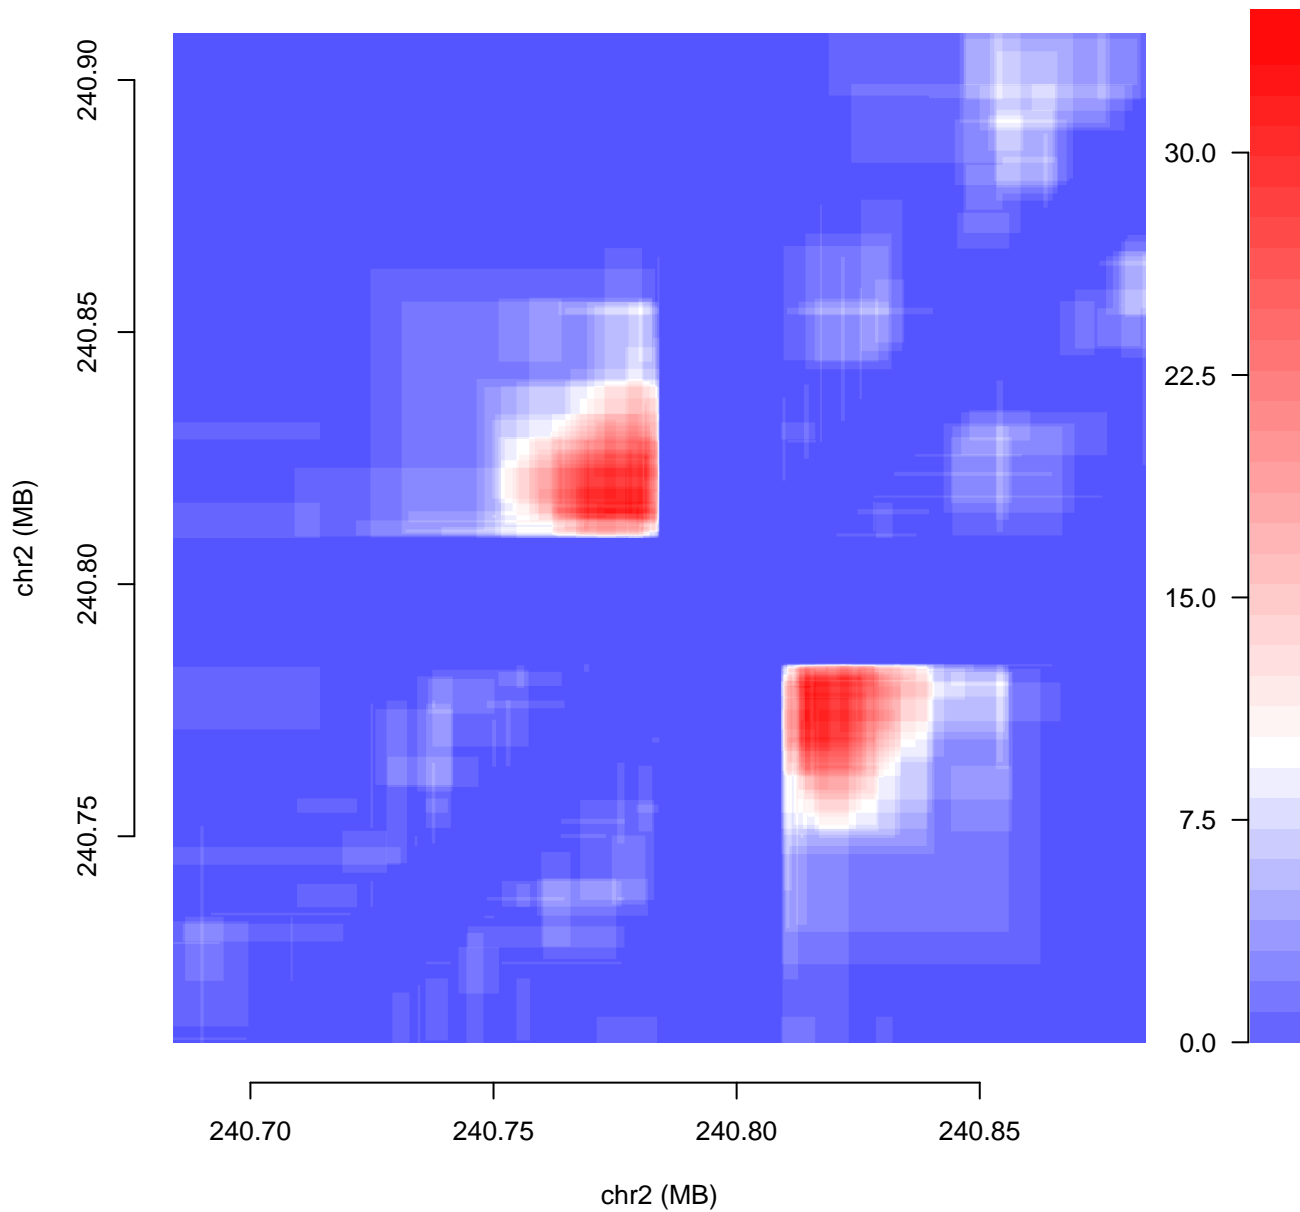

Supplement: Supplemental_Data.zip [file event_411.pdf › event_411.pdf]

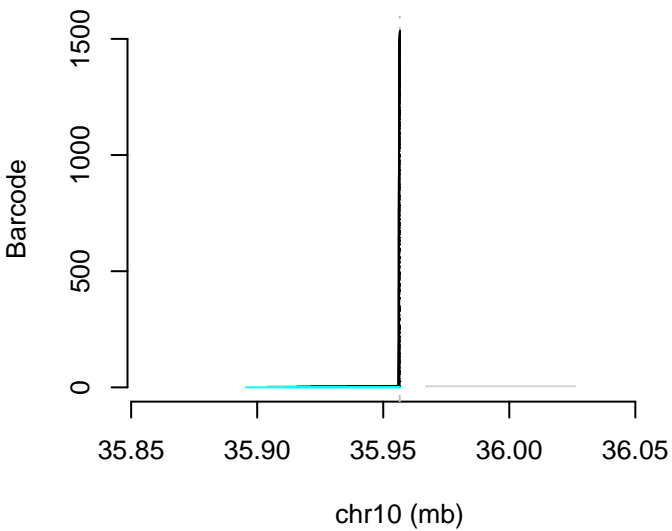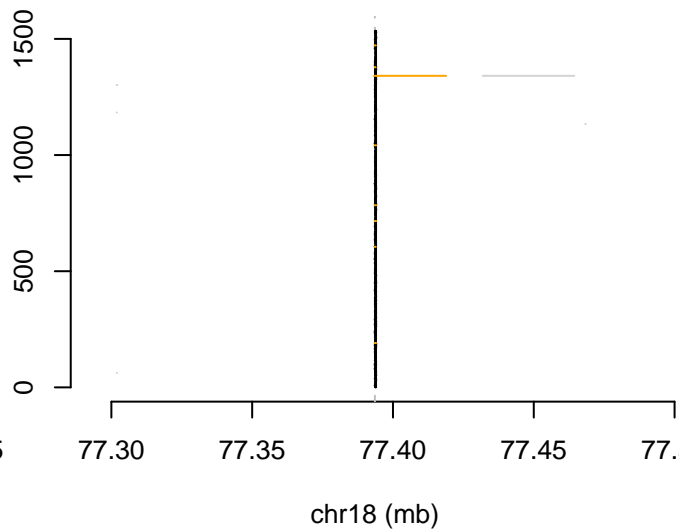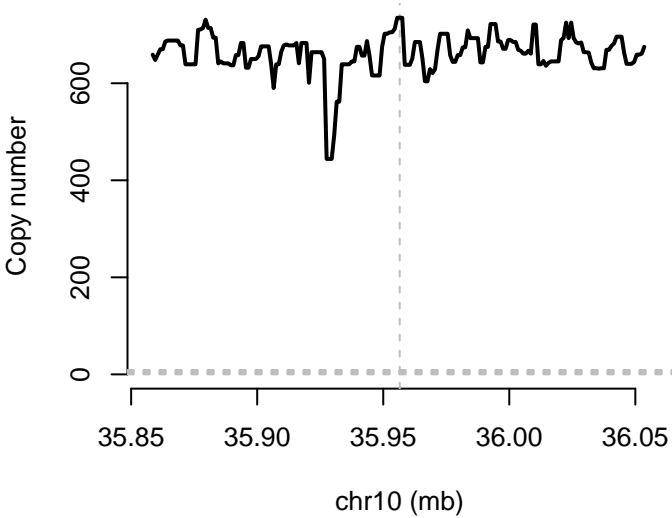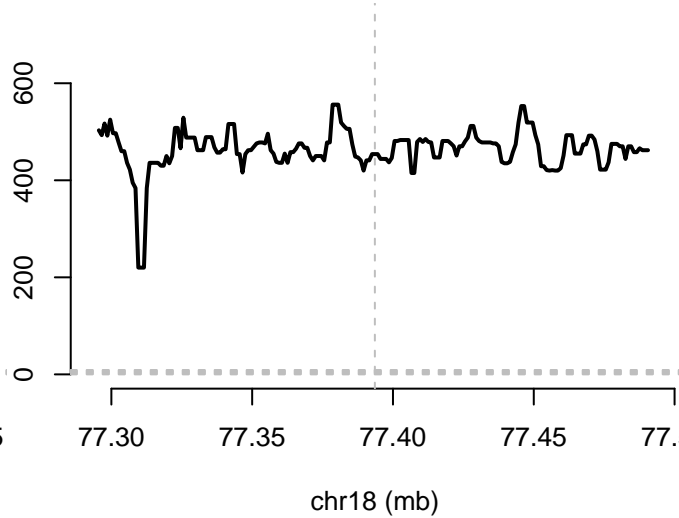

K562 chr18:77,393,571::chr10:35,956,545-+

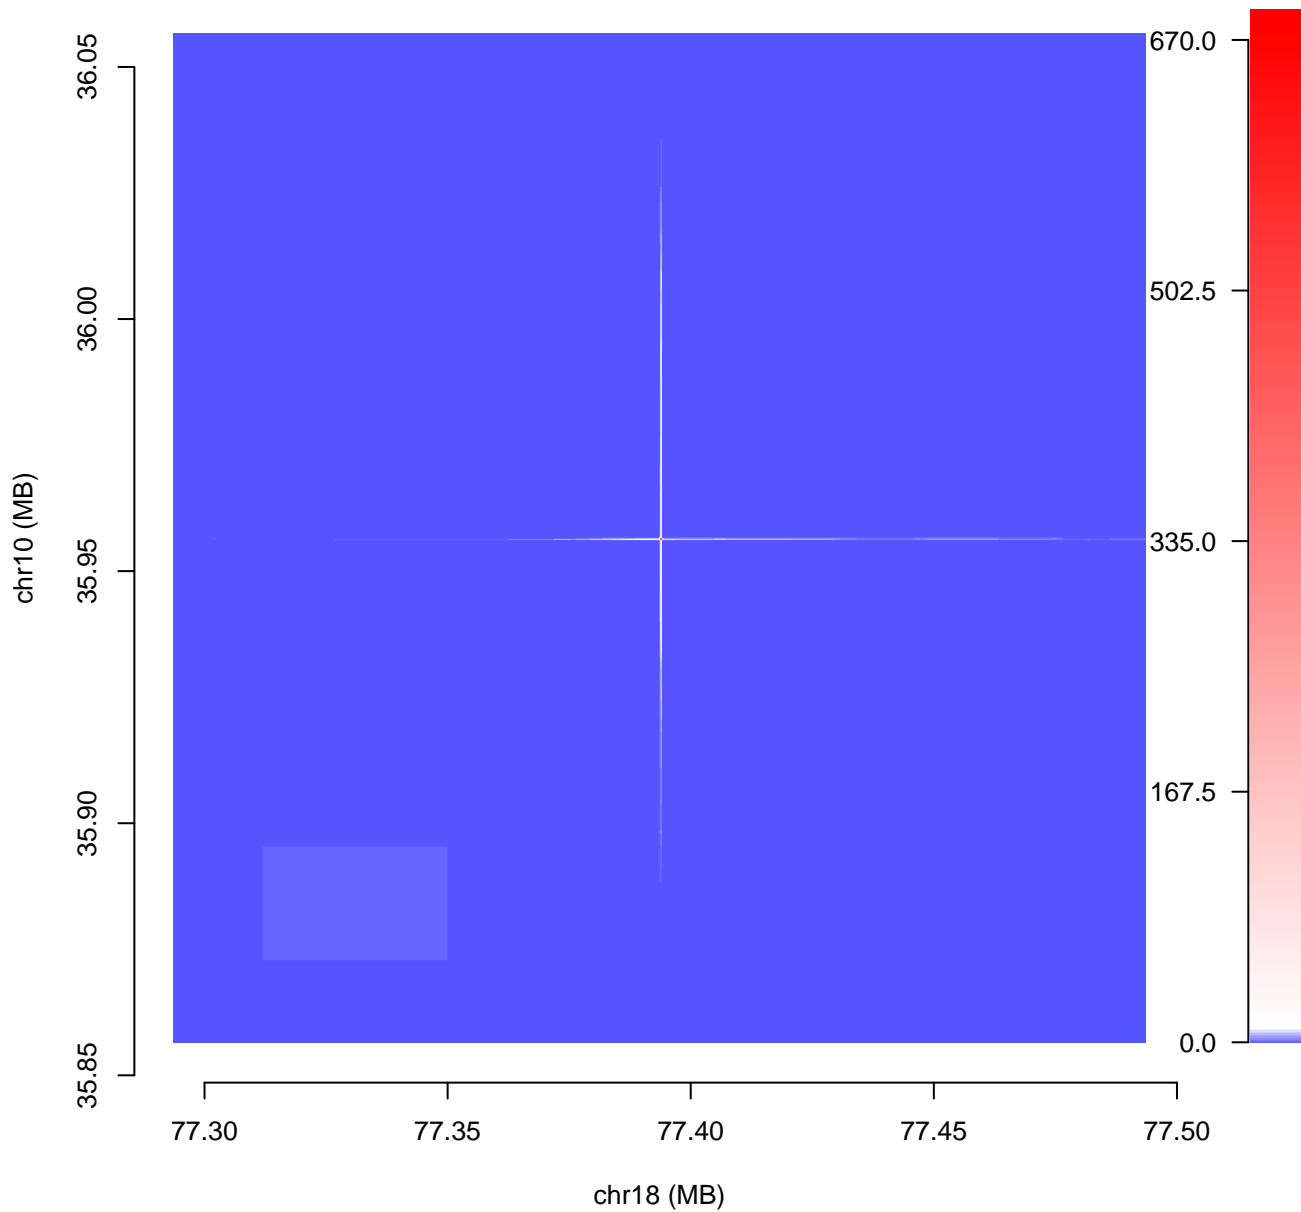

Supplement: Supplemental_Data.zip [file event_412.pdf › event_412.pdf]

Barcode

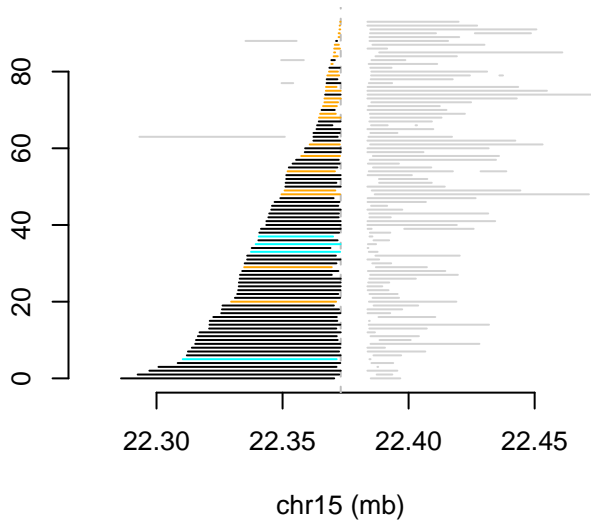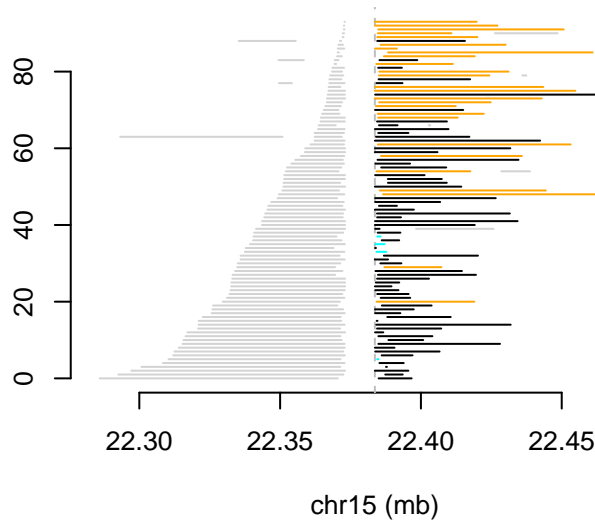

Copy number

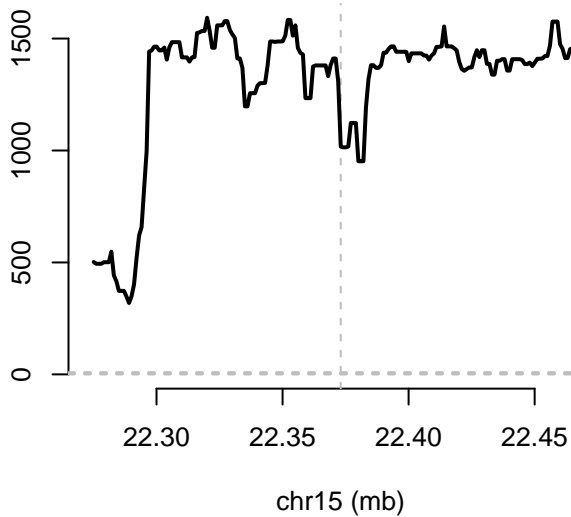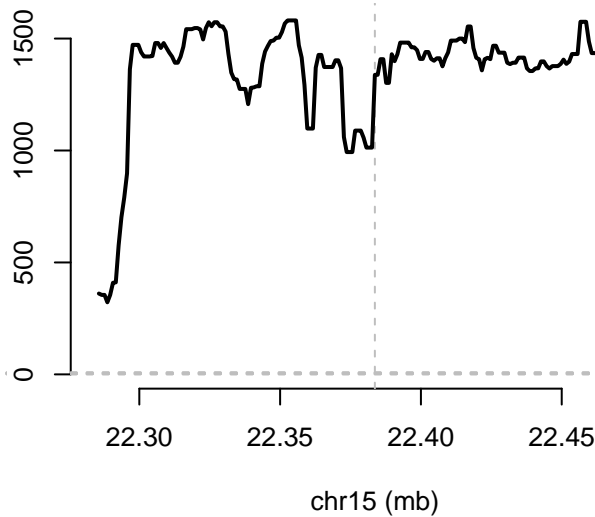

K562 chr15:22,383,652::chr15:22,373,079-+

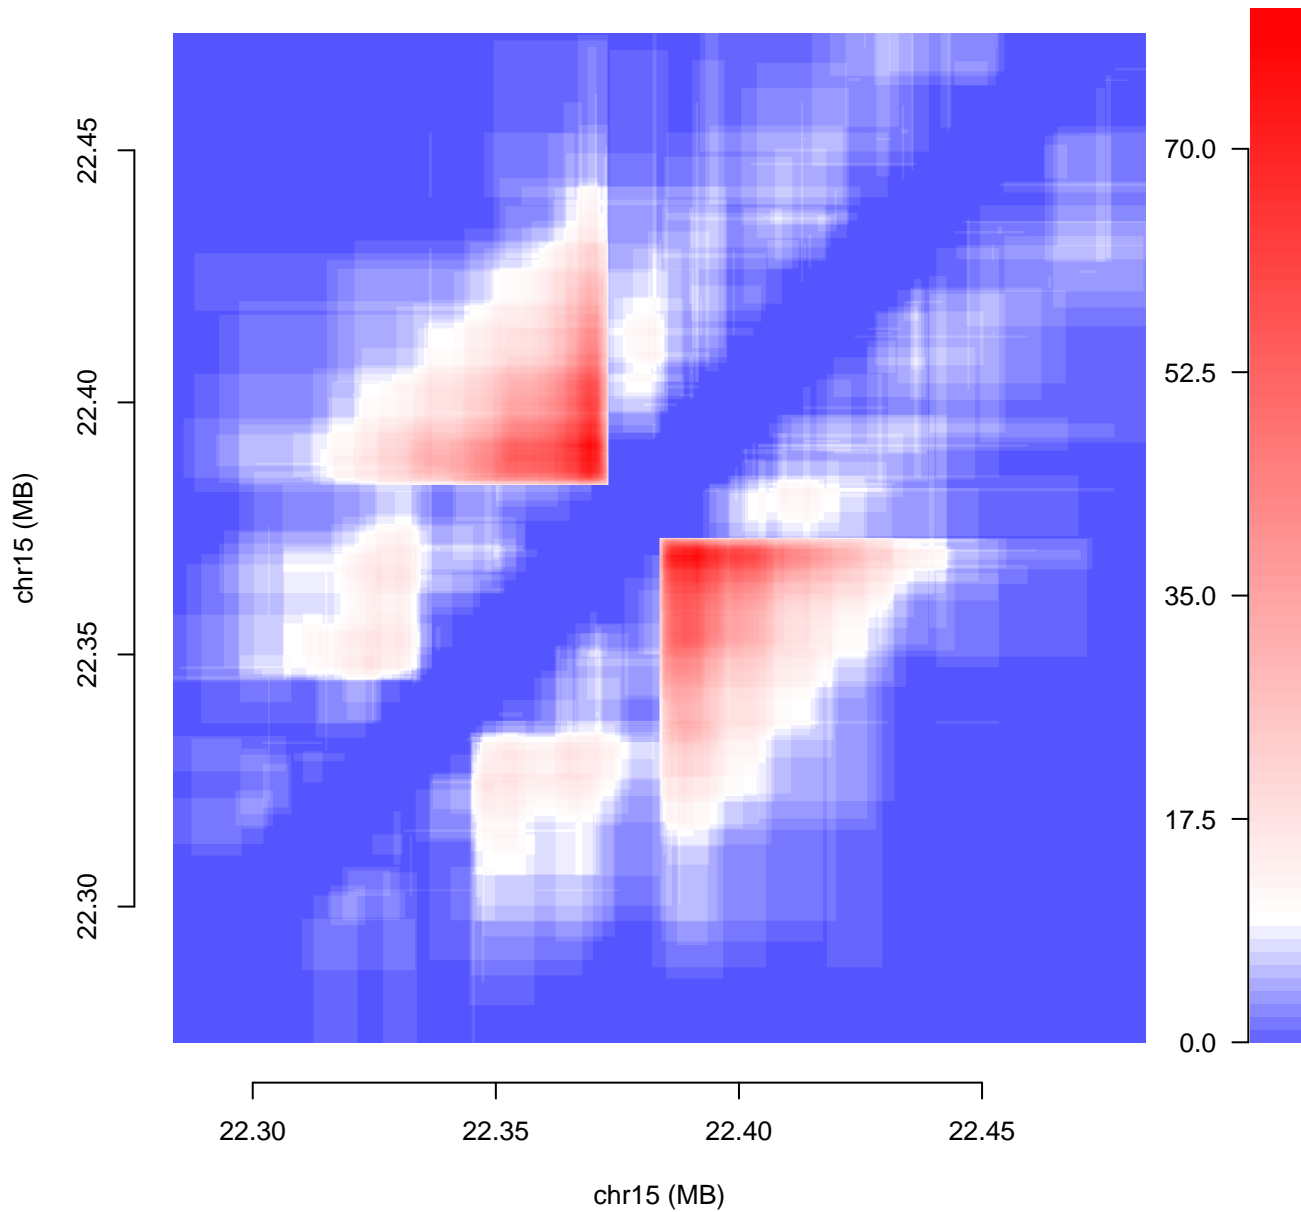

Supplement: Supplemental_Data.zip [file event_413.pdf › event_413.pdf]

Barcode

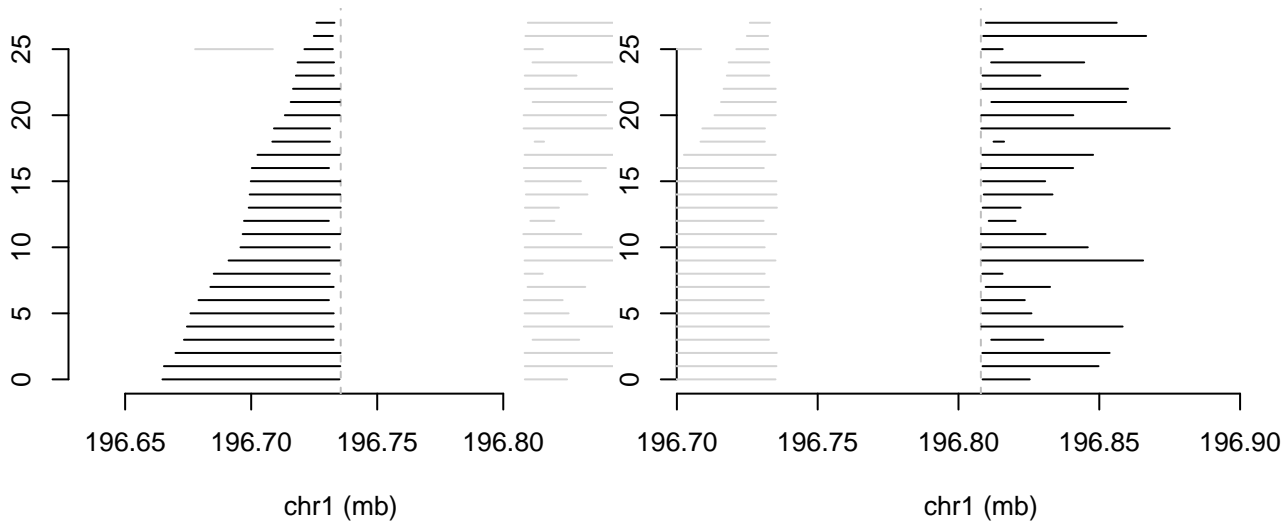

Copy number

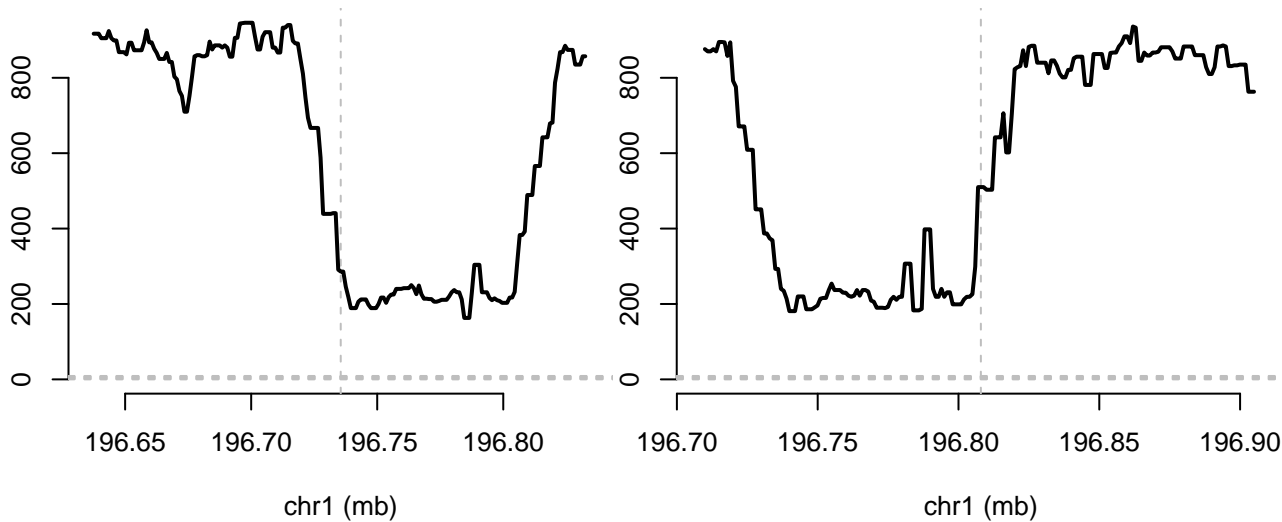

K562 chr1:196,735,529::chr1:196,807,951+-

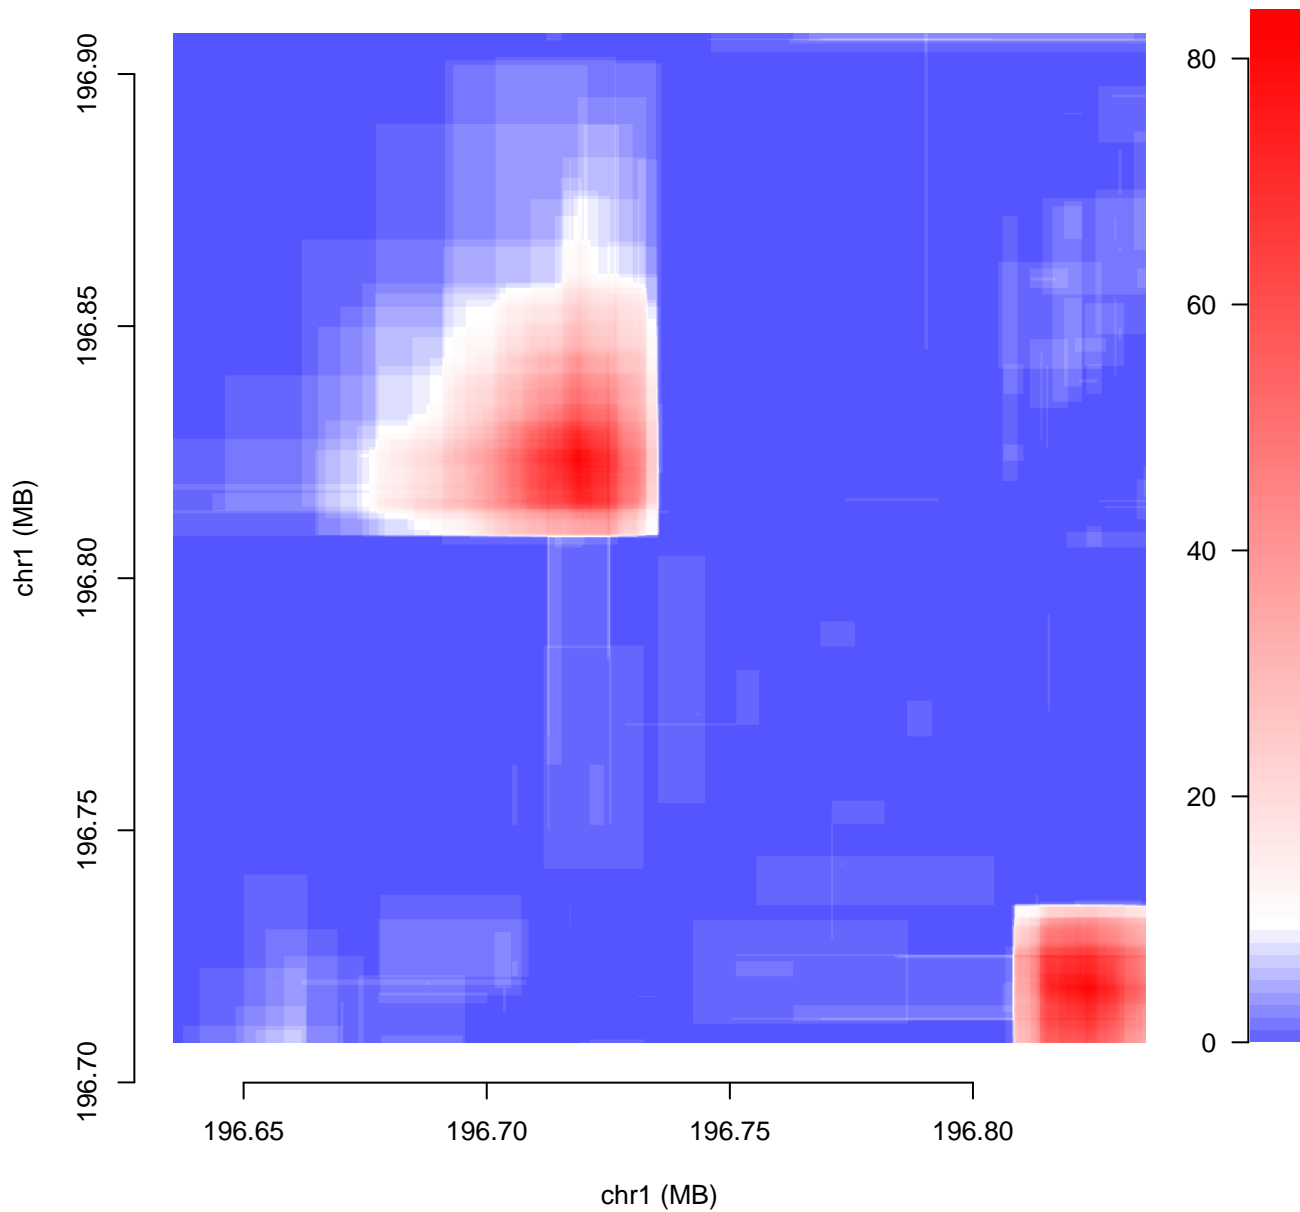

Supplement: Supplemental_Data.zip [file event_414.pdf › event_414.pdf]

Barcode

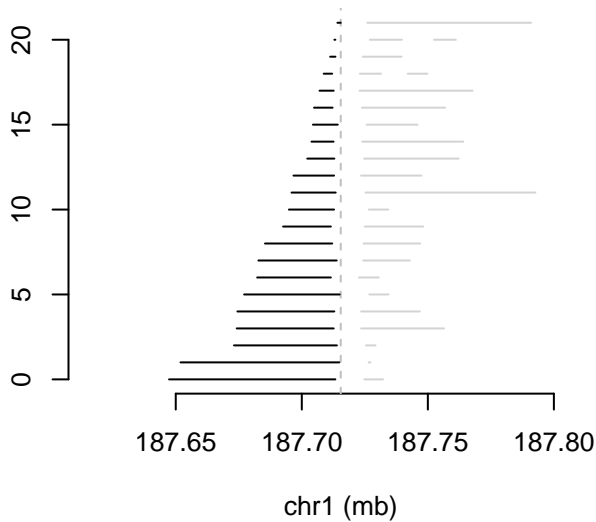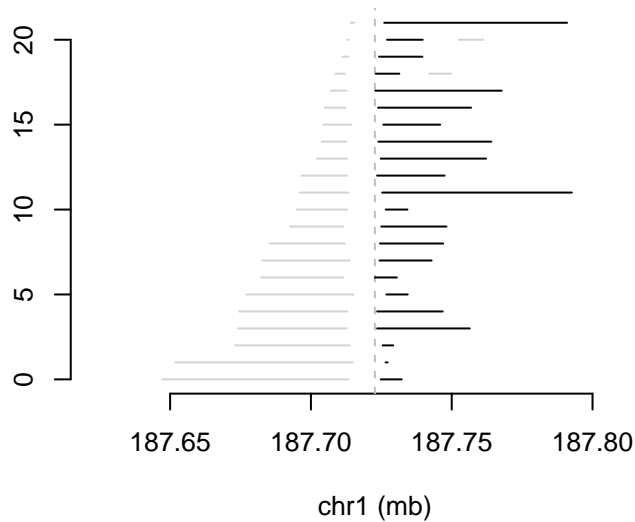

Copy number

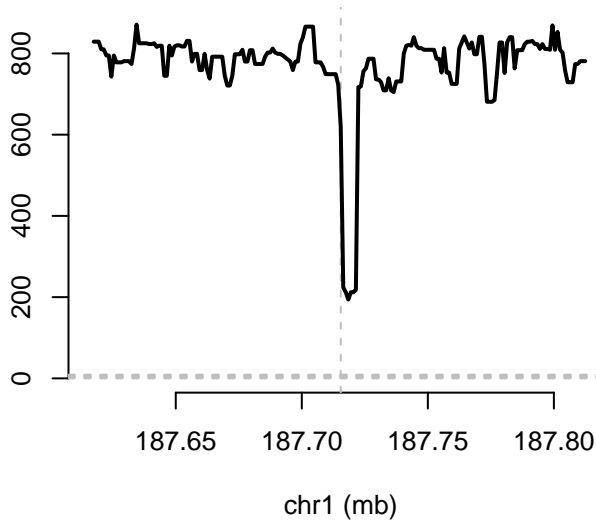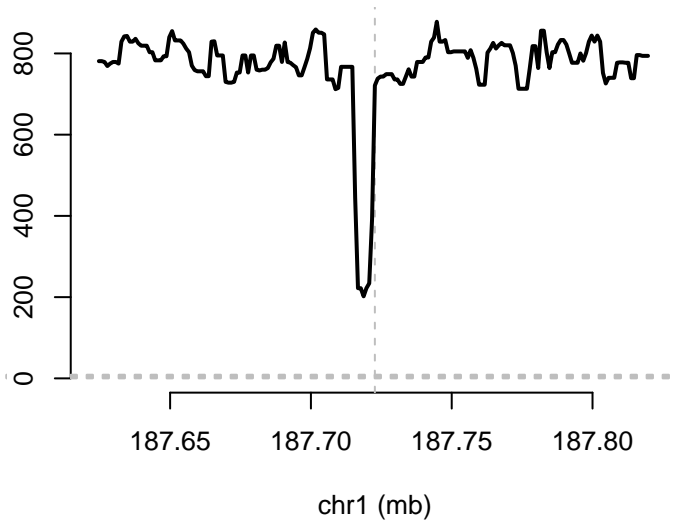

K562 chr1:187,715,447::chr1:187,722,712+-

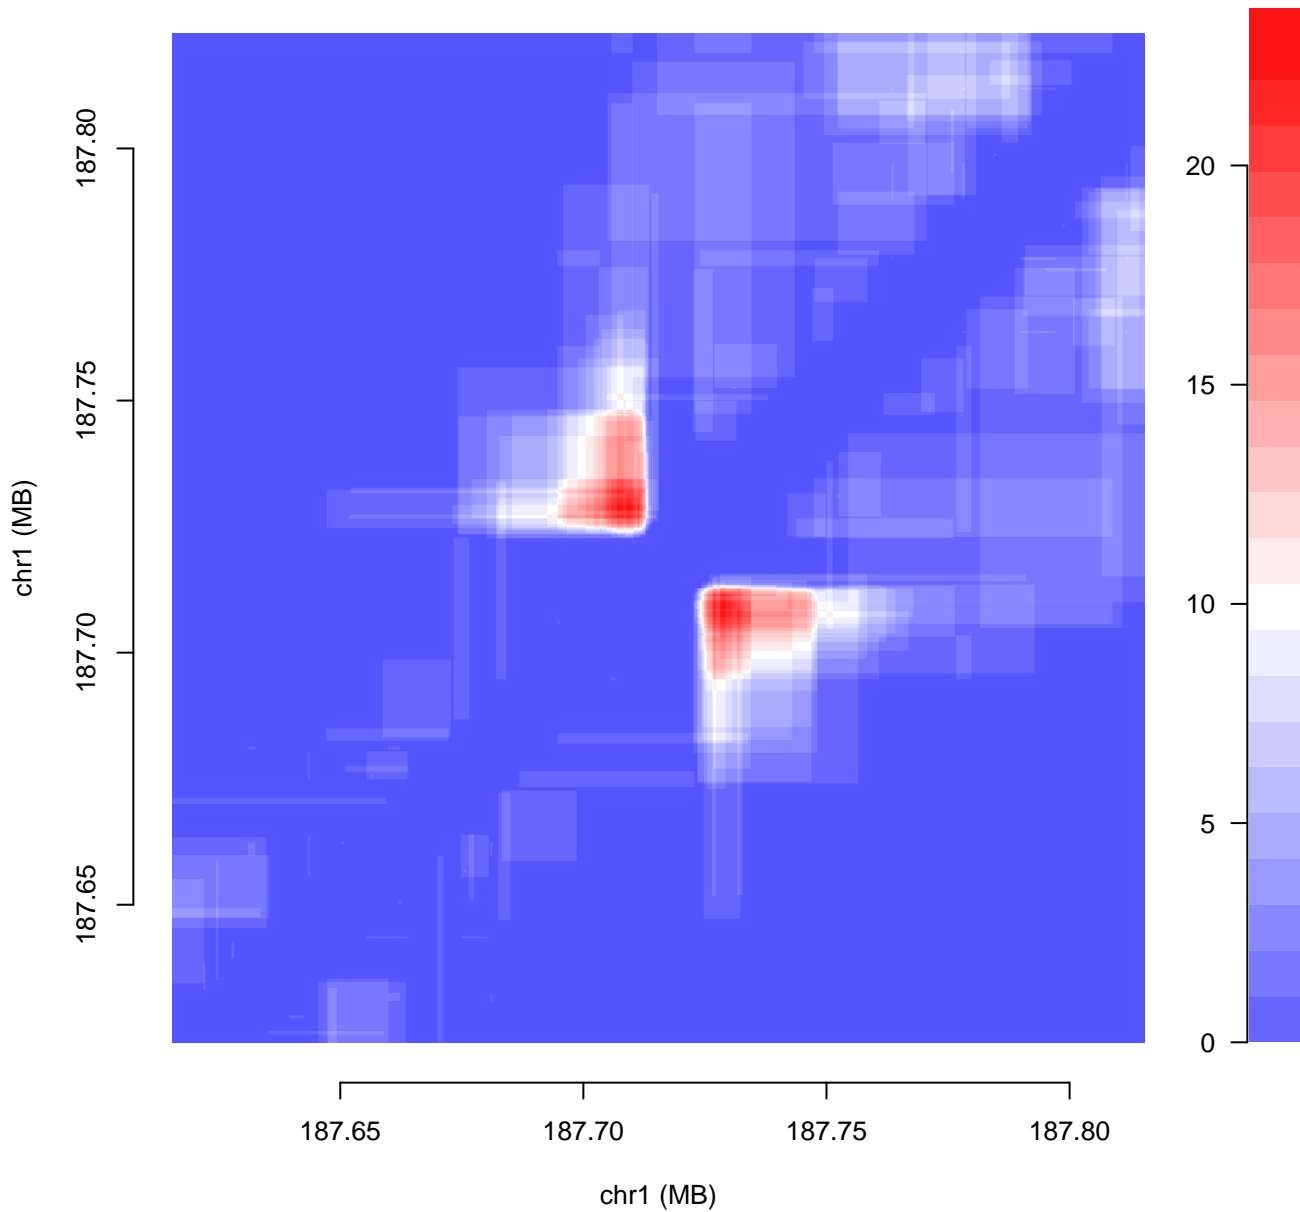

Supplement: Supplemental_Data.zip [file event_415.pdf › event_415.pdf]

Barcode

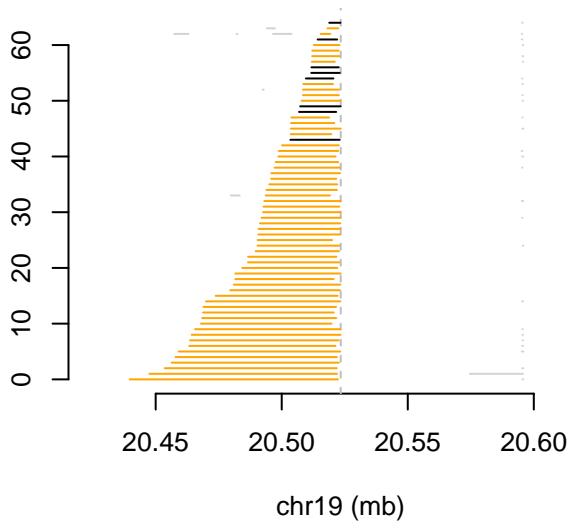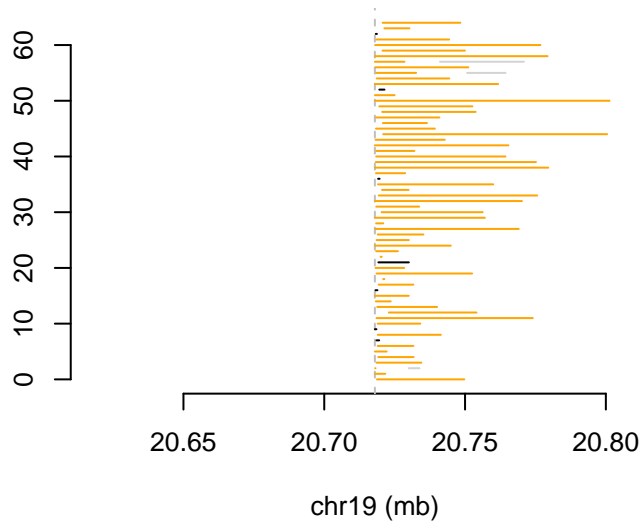

Copy number

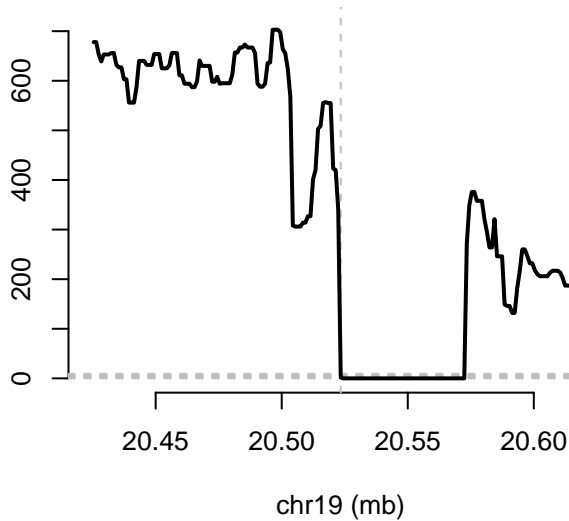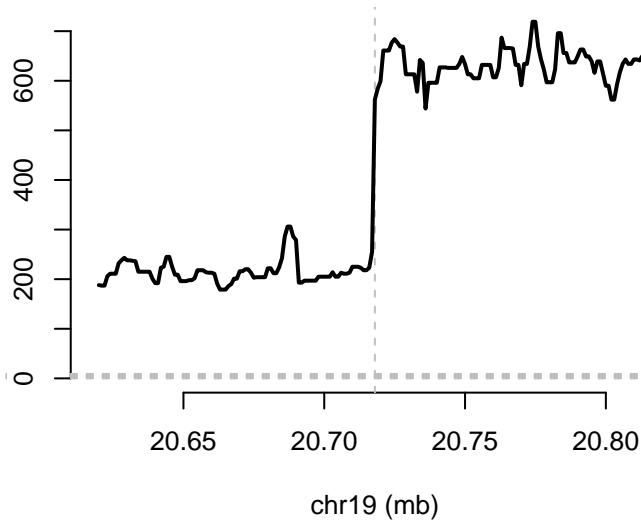

K562 chr19:20,523,415::chr19:20,717,971+-

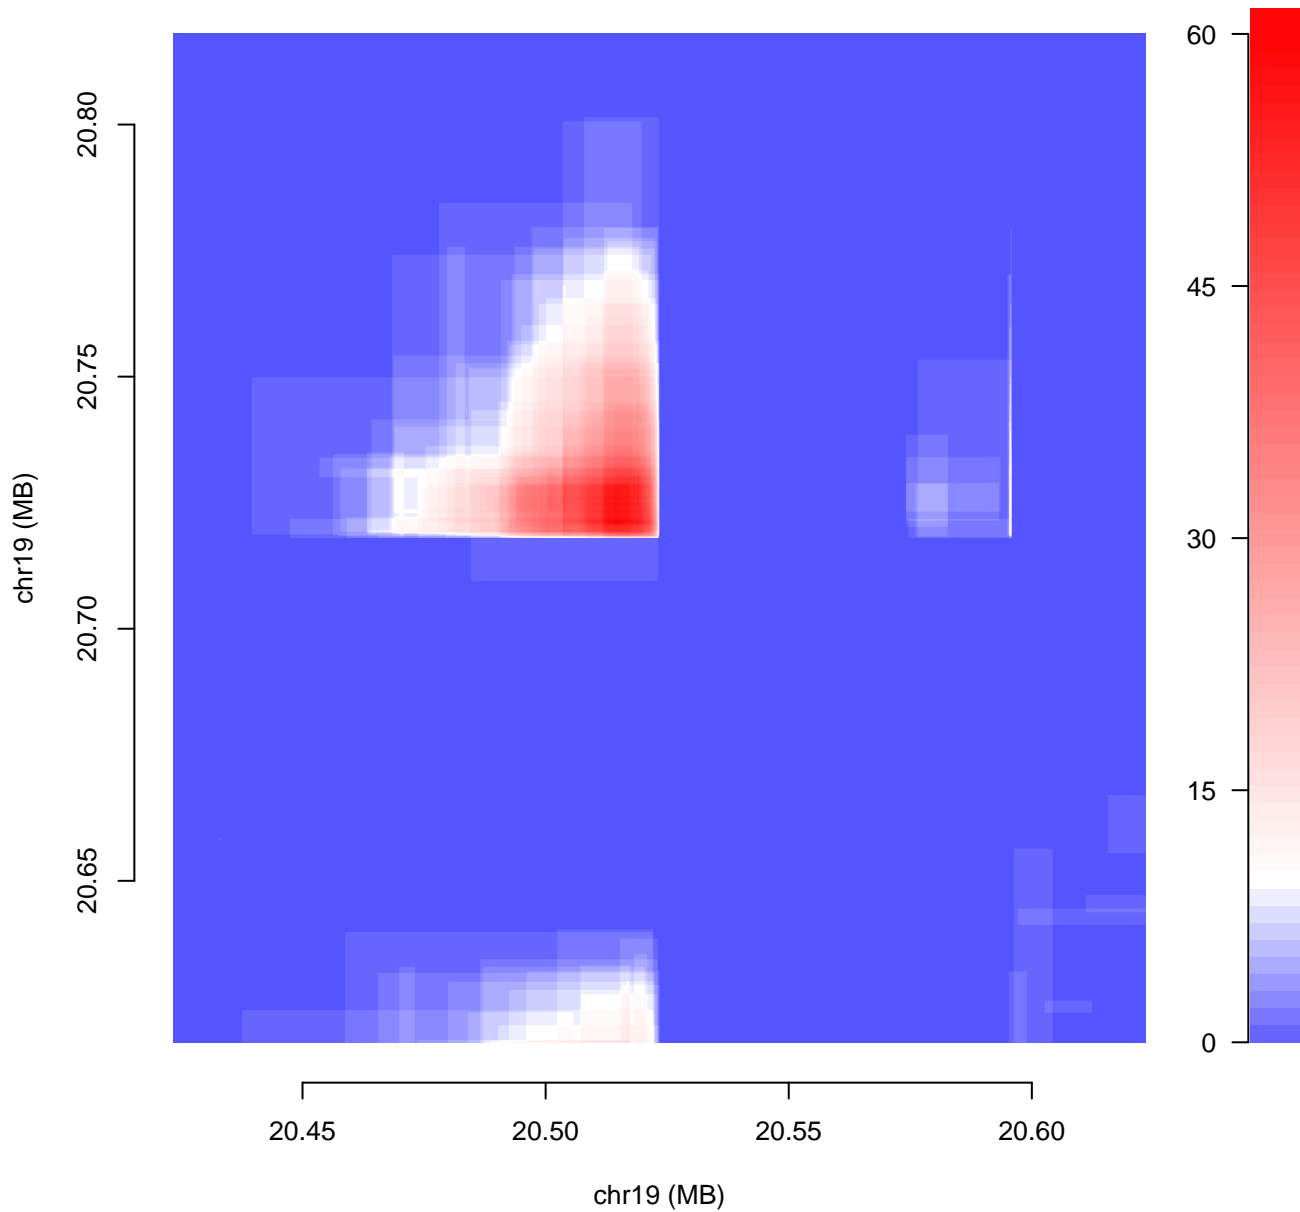

Supplement: Supplemental_Data.zip [file event_416.pdf › event_416.pdf]

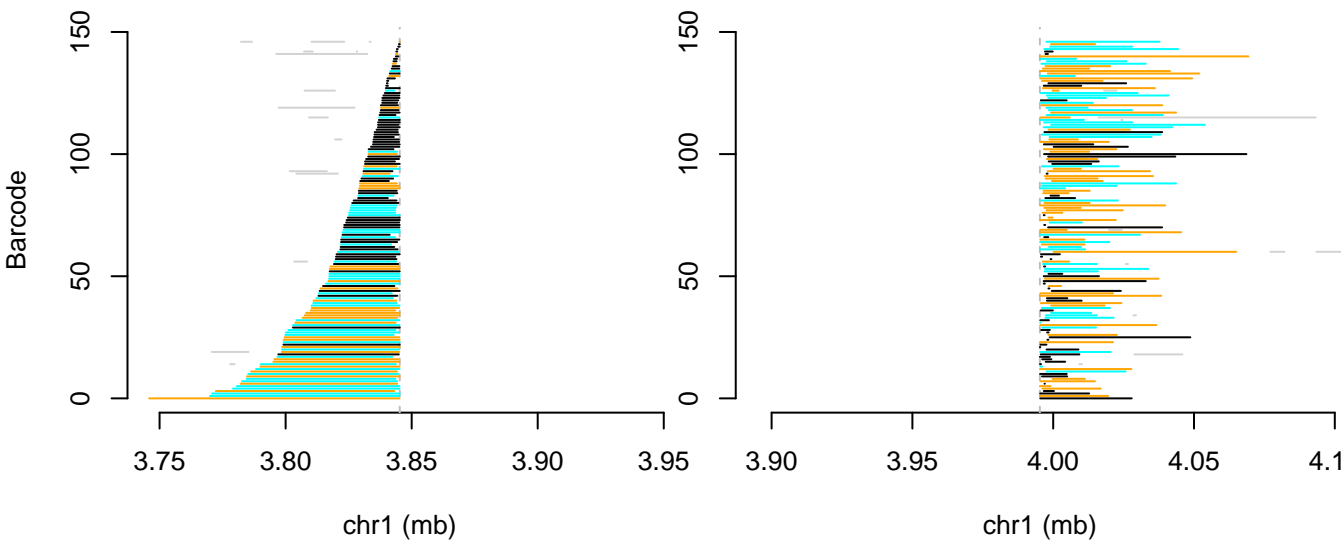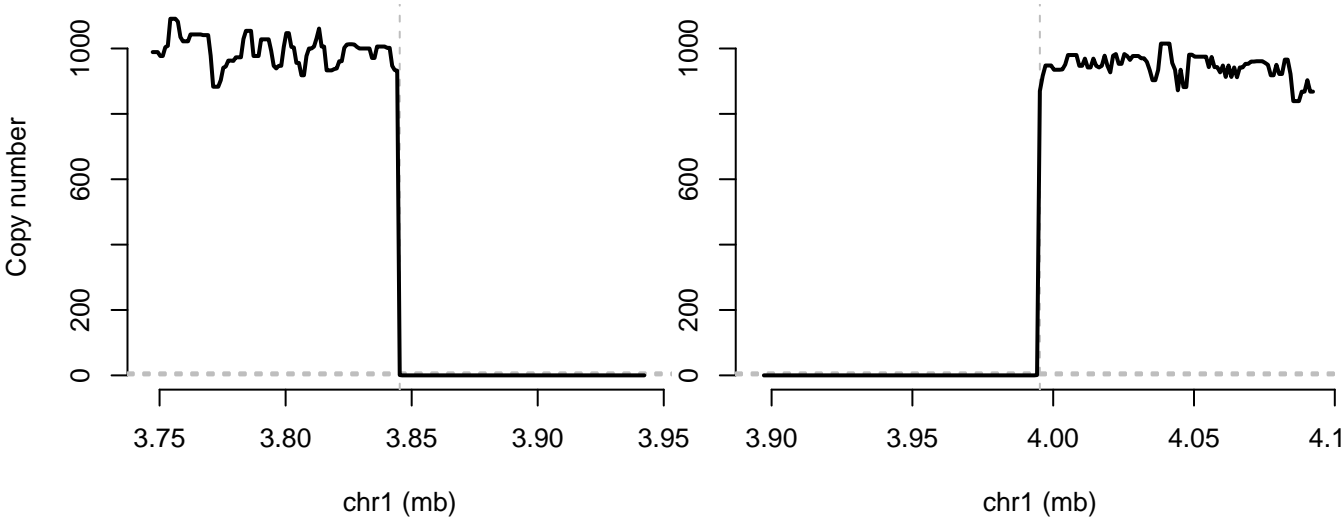

K562 chr1:3,845,268::chr1:3,995,267+-

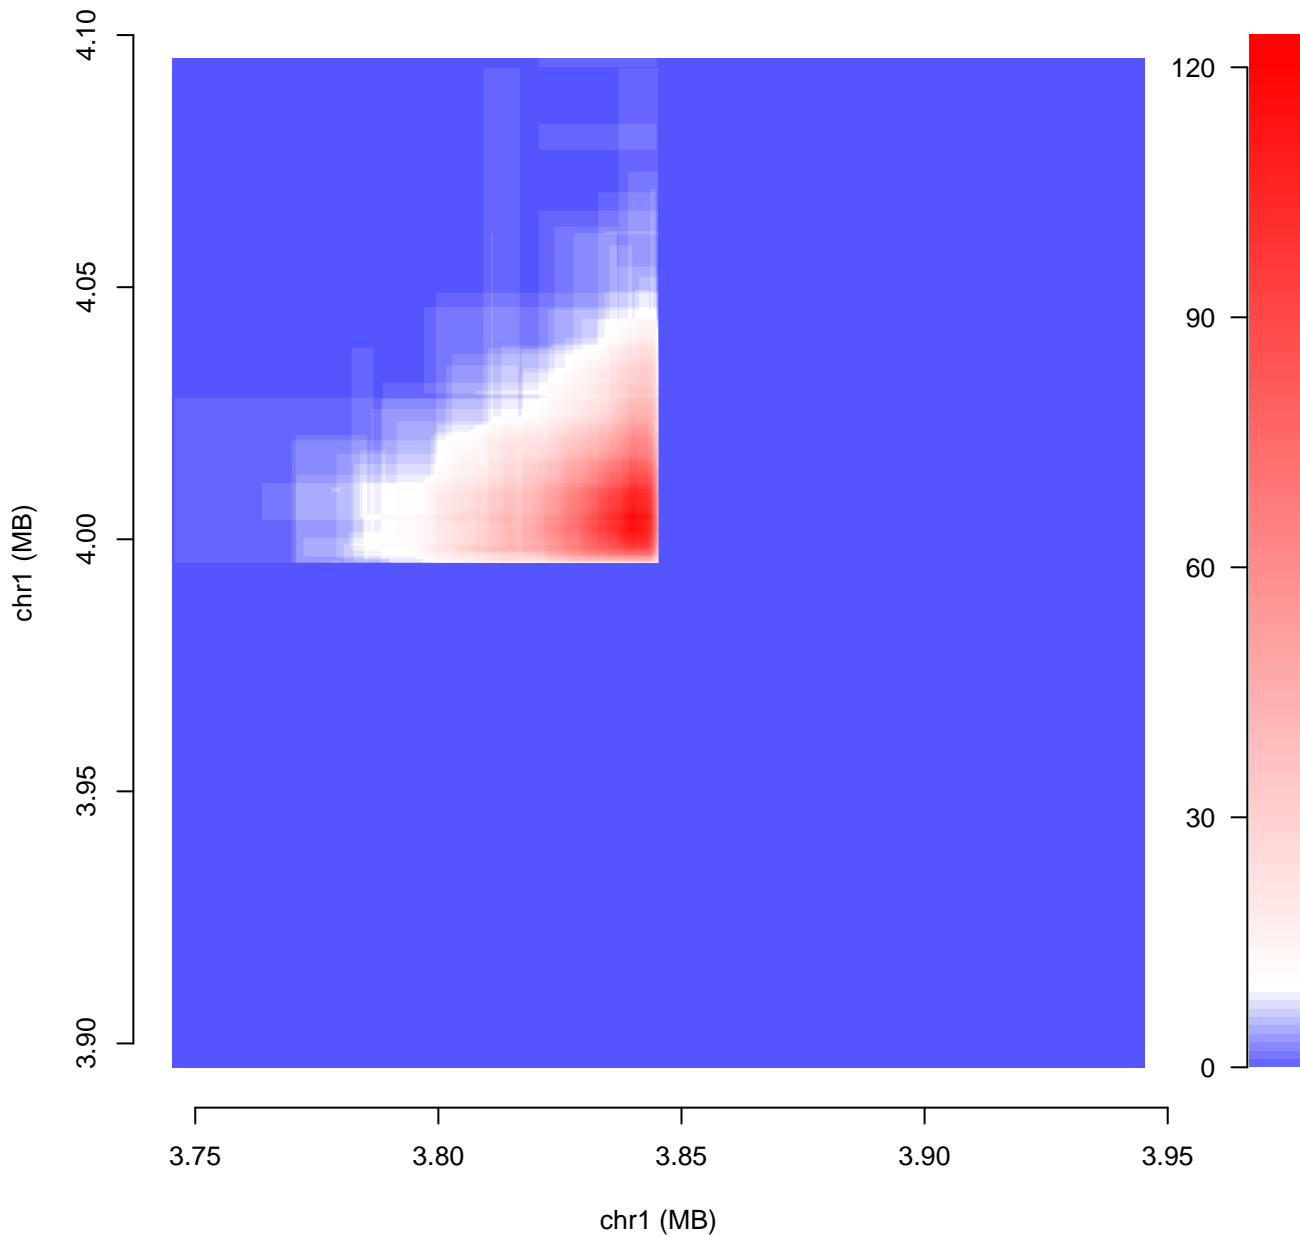

Supplement: Supplemental_Data.zip [file event_417.pdf › event_417.pdf]

Barcode

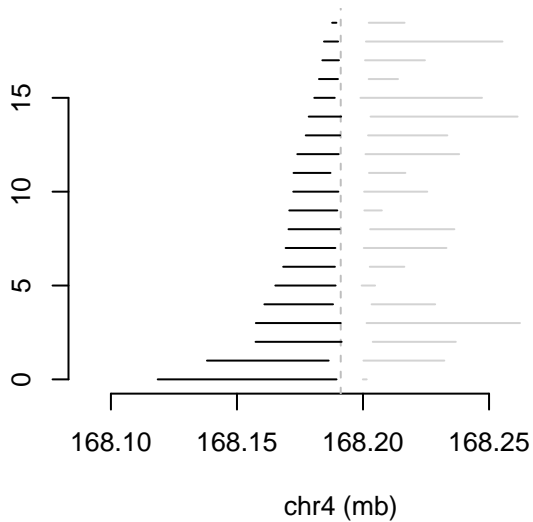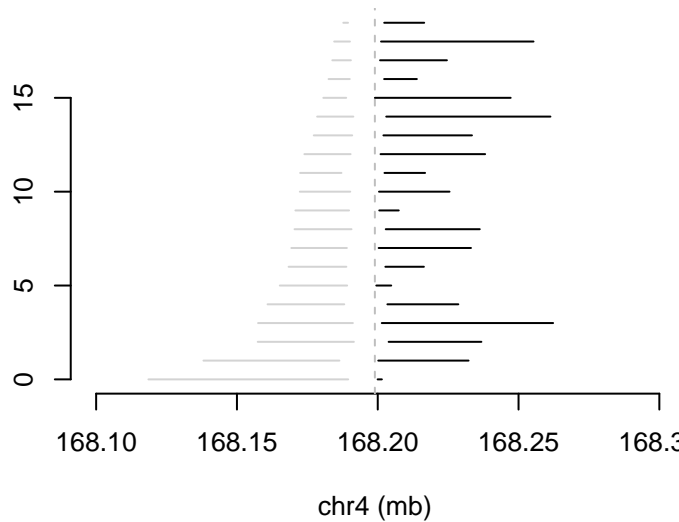

Copy number

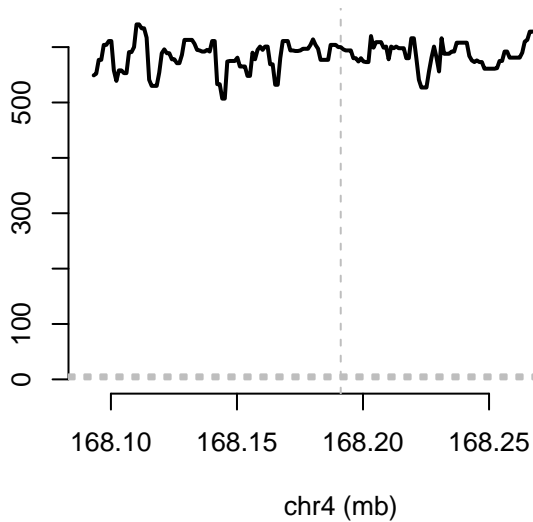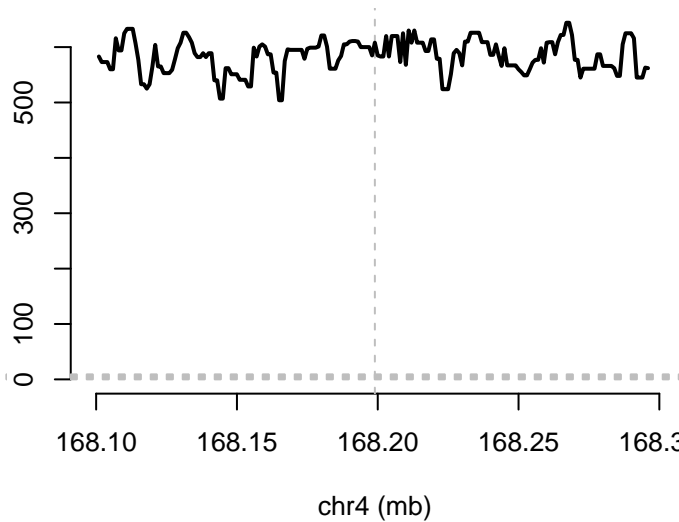

K562 chr4:168,198,978::chr4:168,191,169-+

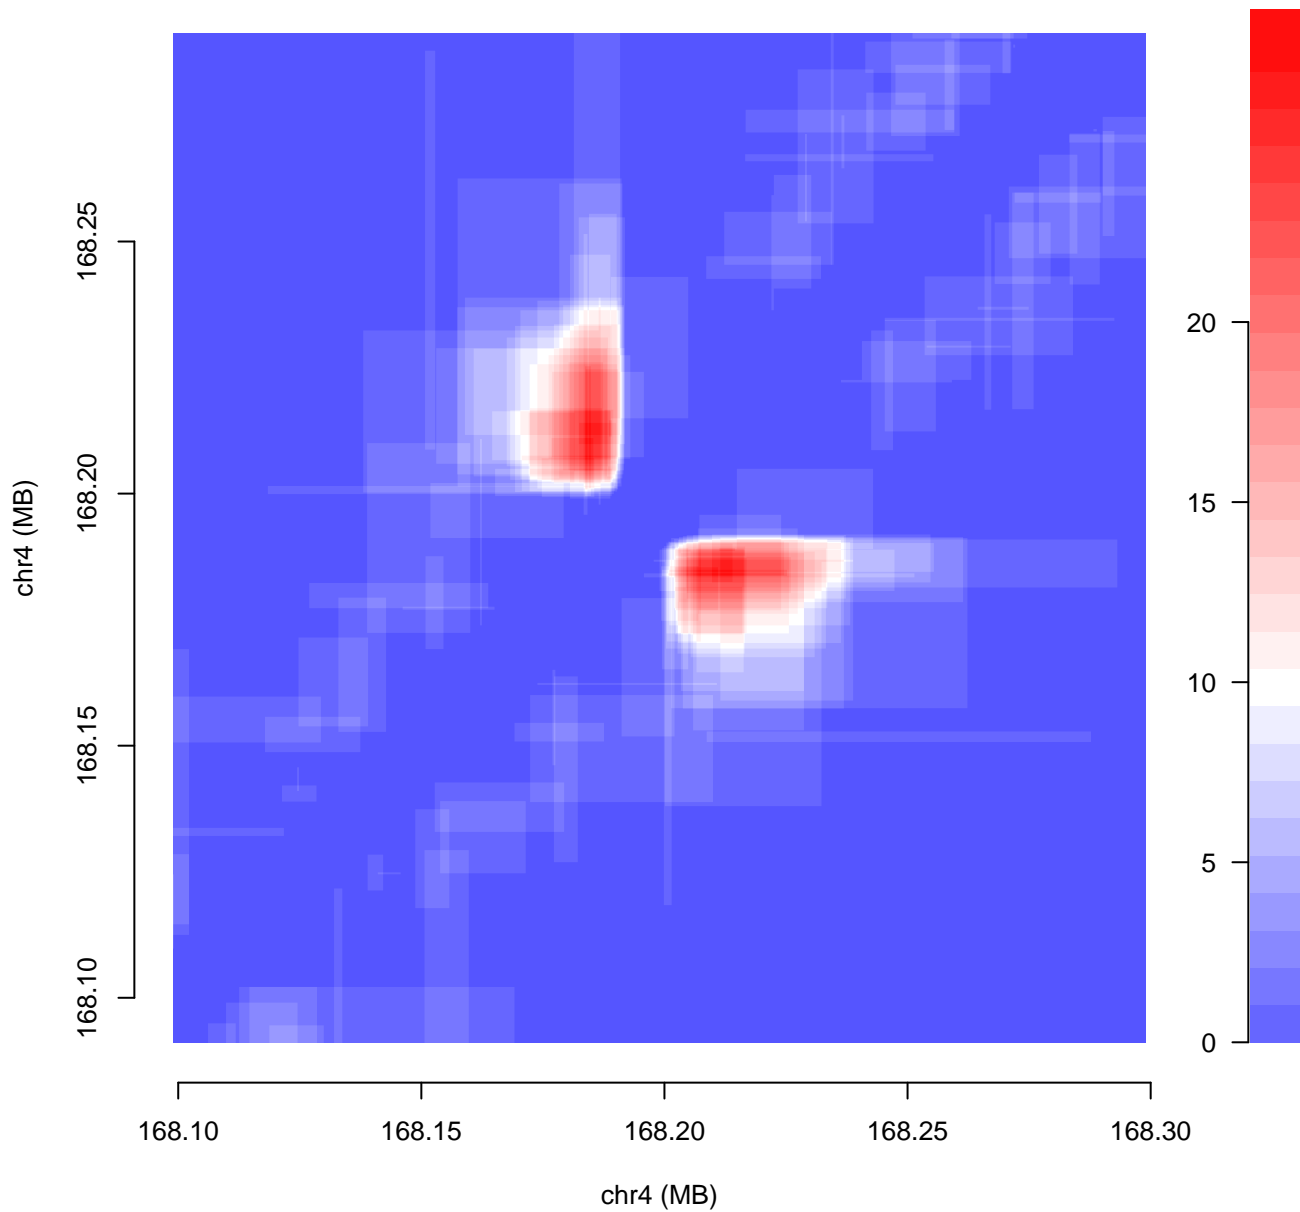

Supplement: Supplemental_Data.zip [file event_418.pdf › event_418.pdf]

Barcode

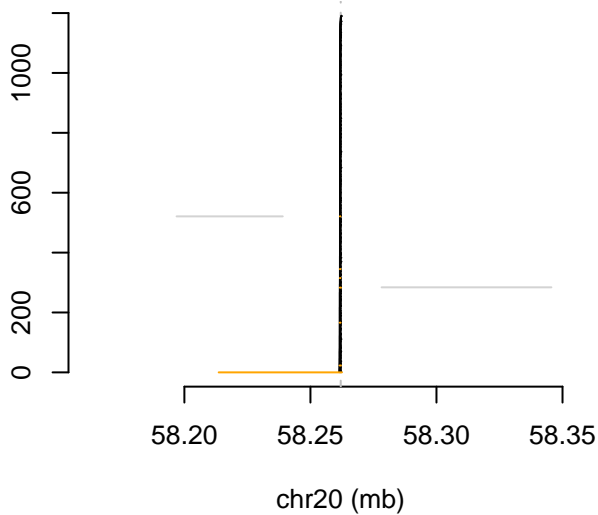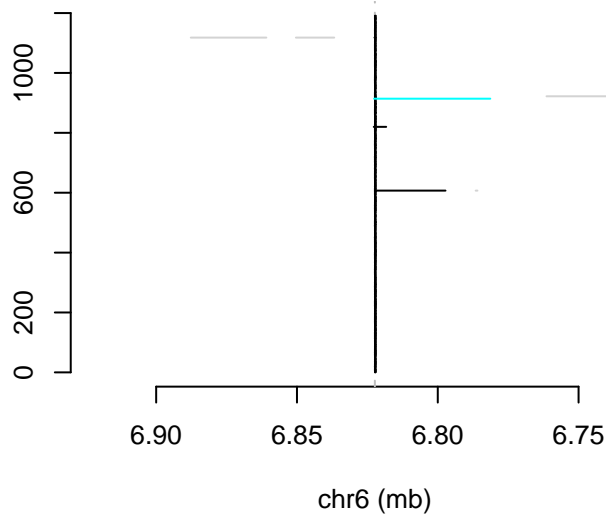

Copy number

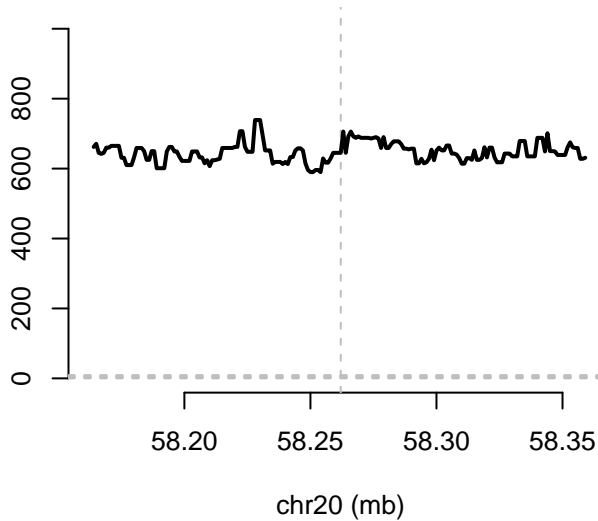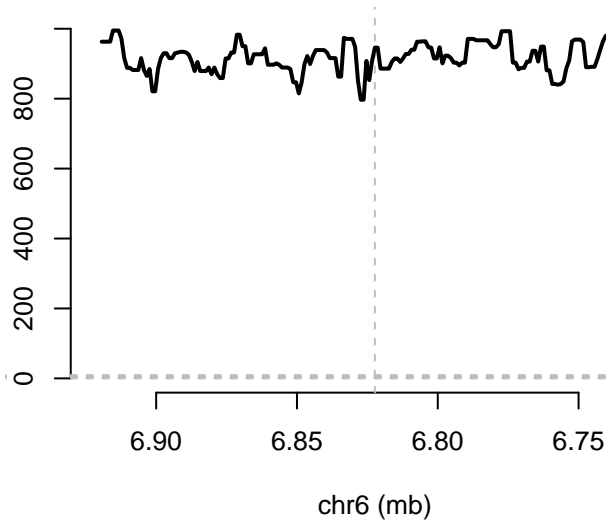

K562 chr20:58,262,025::chr6:6,822,333++

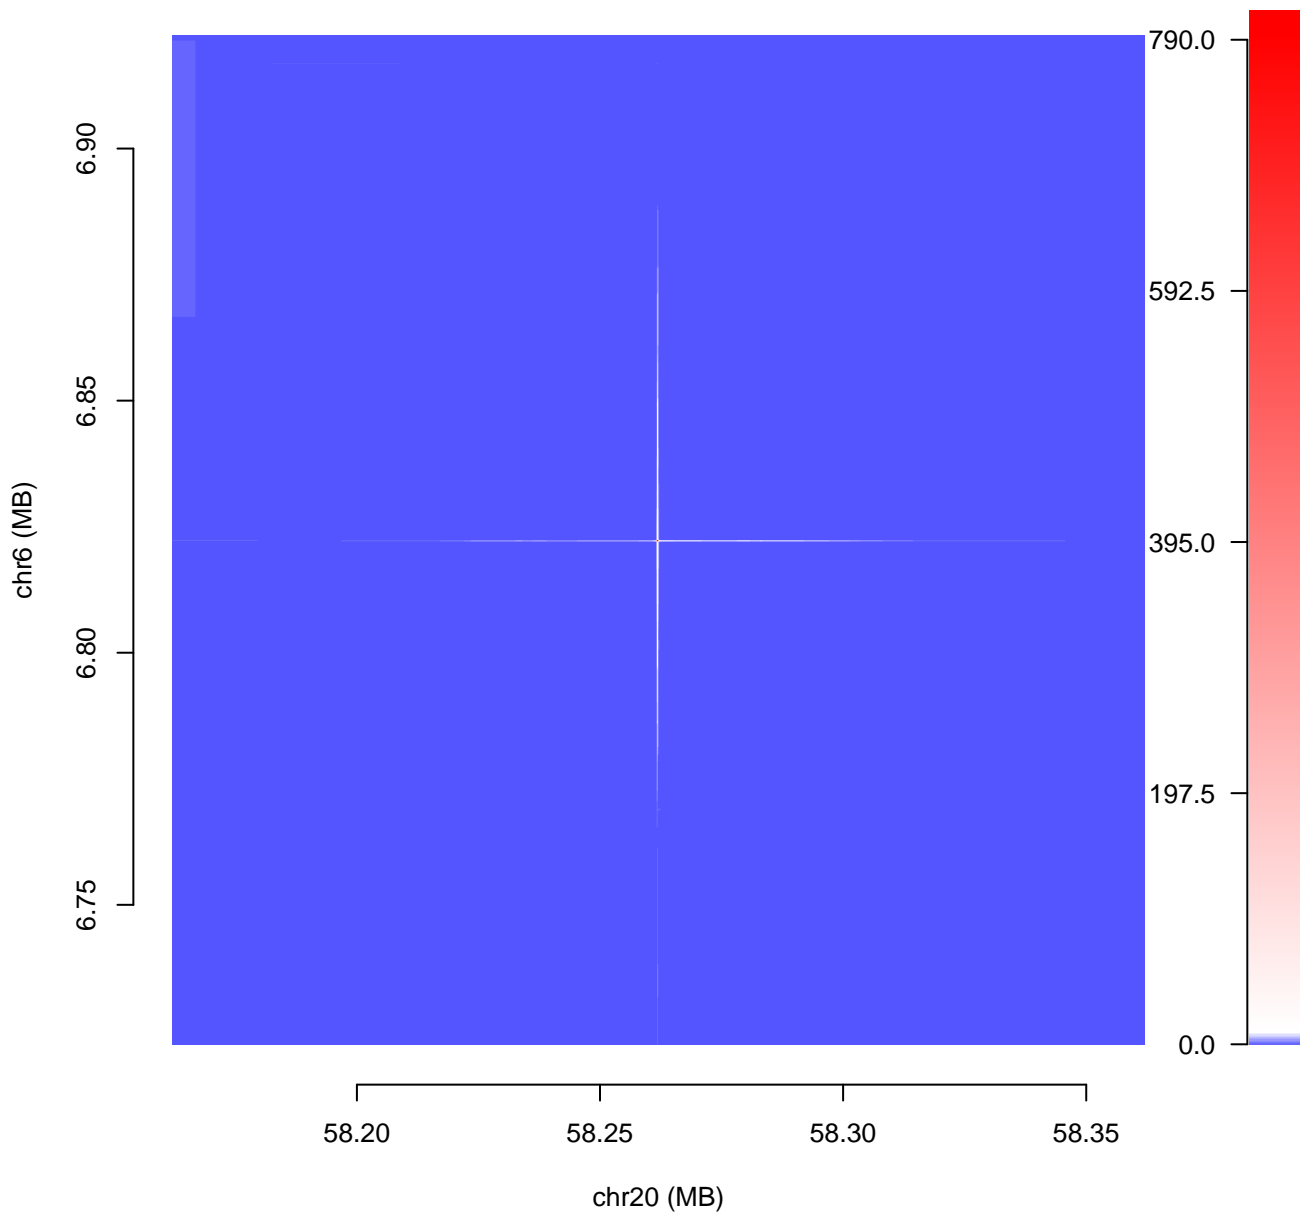

Supplement: Supplemental_Data.zip [file event_419.pdf › event_419.pdf]

Barcode

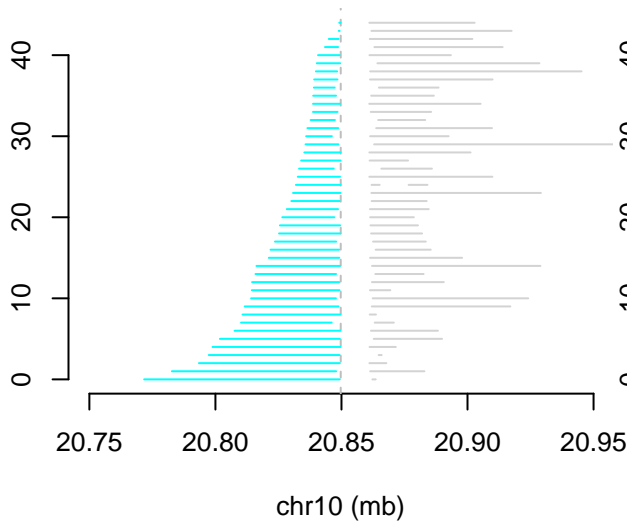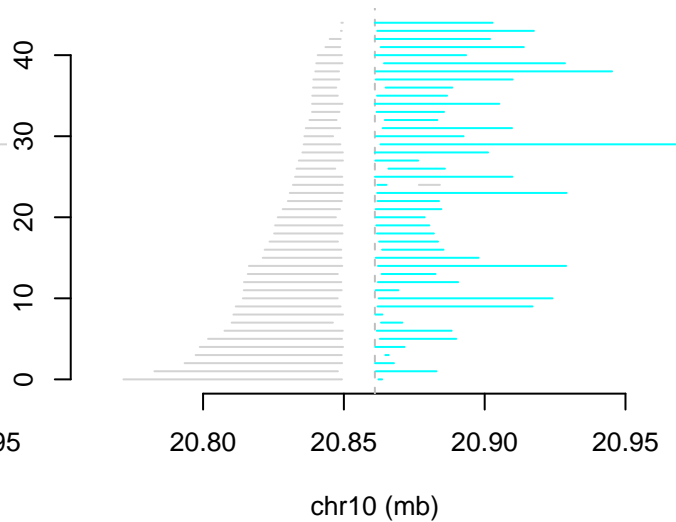

Copy number

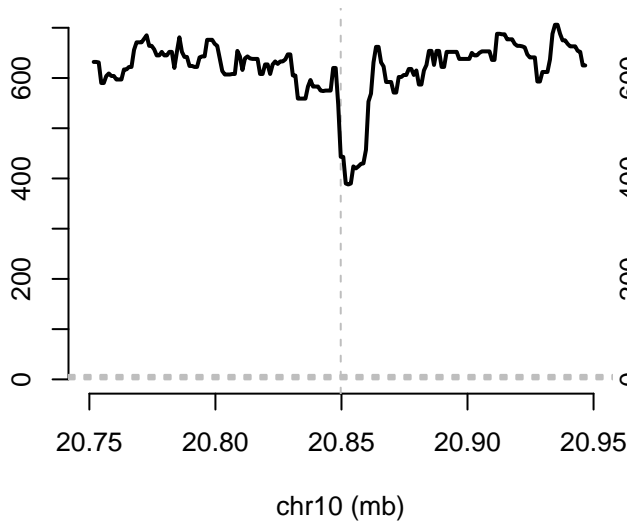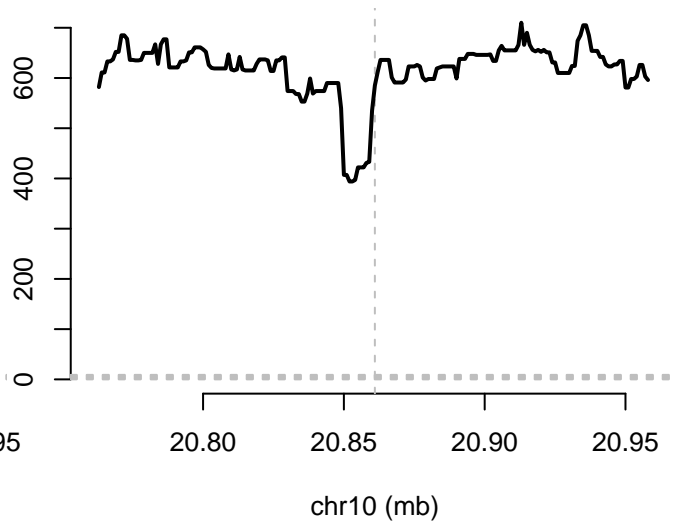

K562 chr10:20,861,010::chr10:20,849,713-+

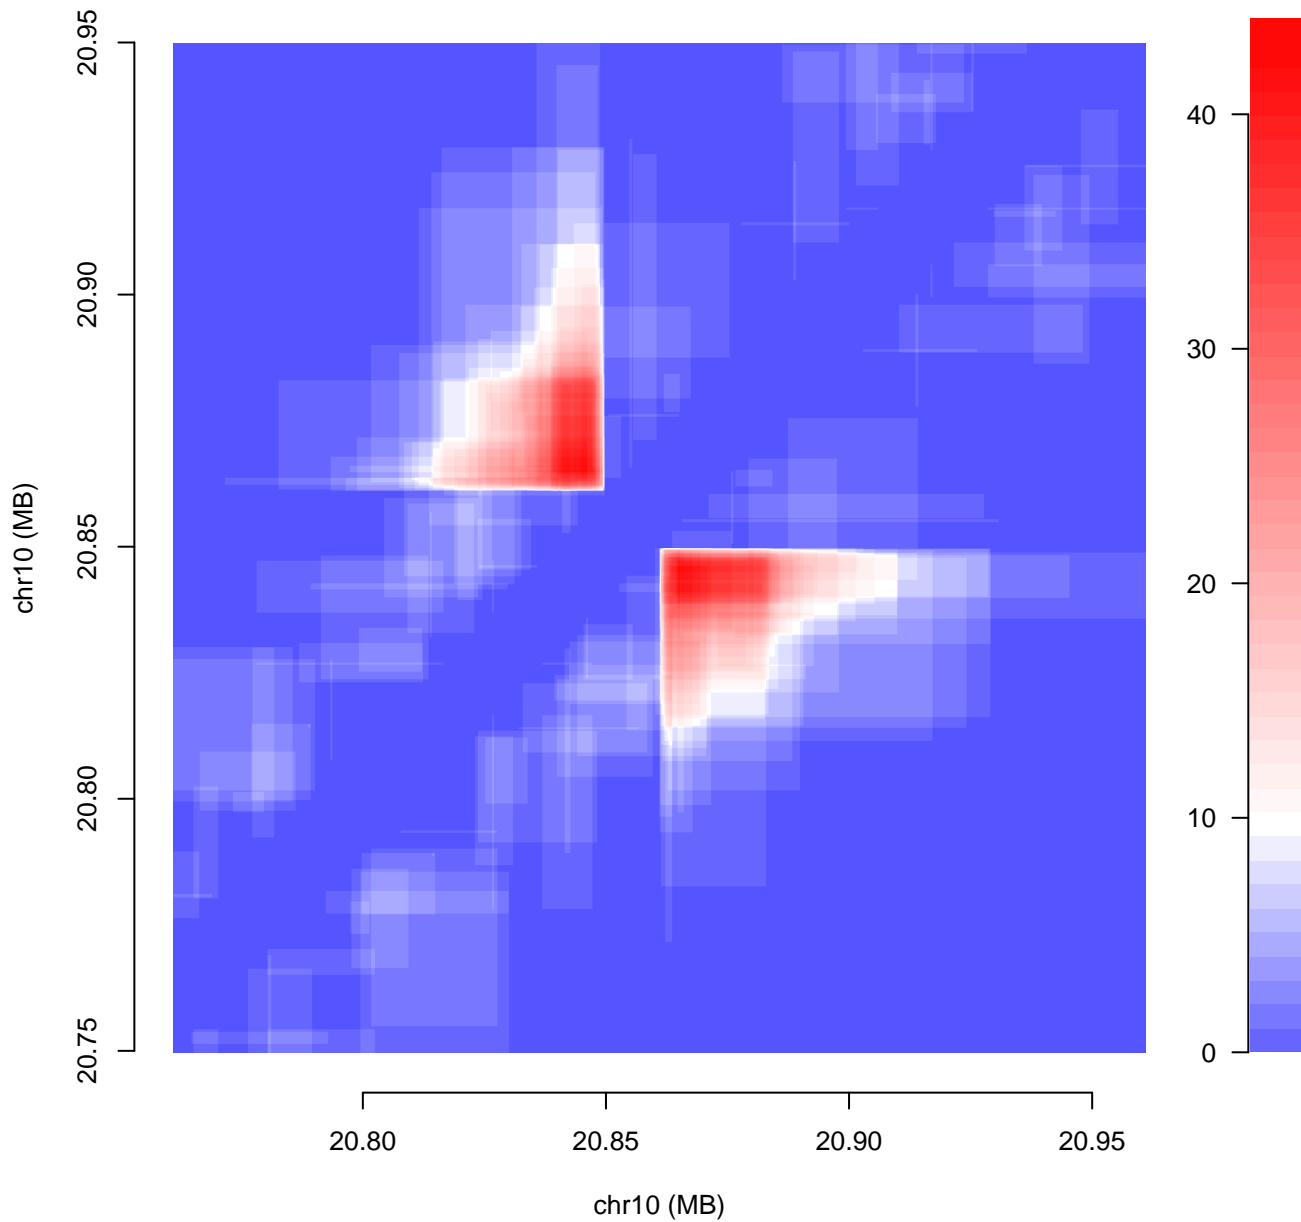

Supplement: Supplemental_Data.zip [file event_42.pdf › event_42.pdf]

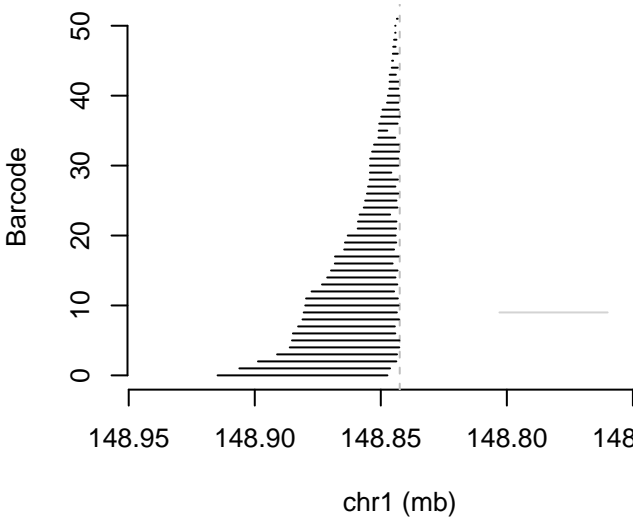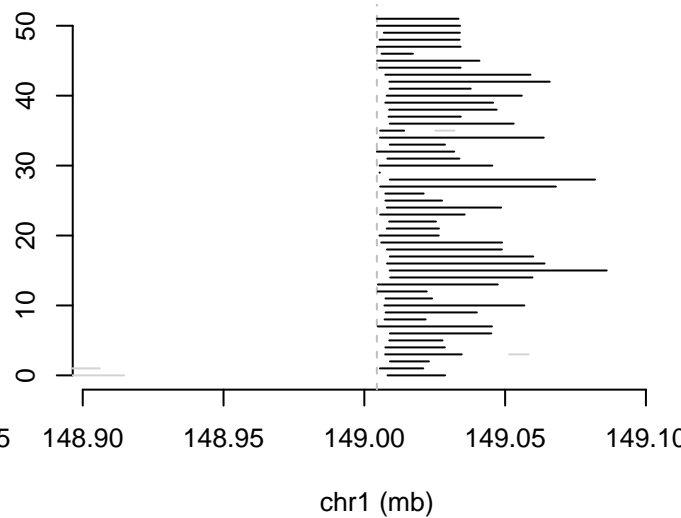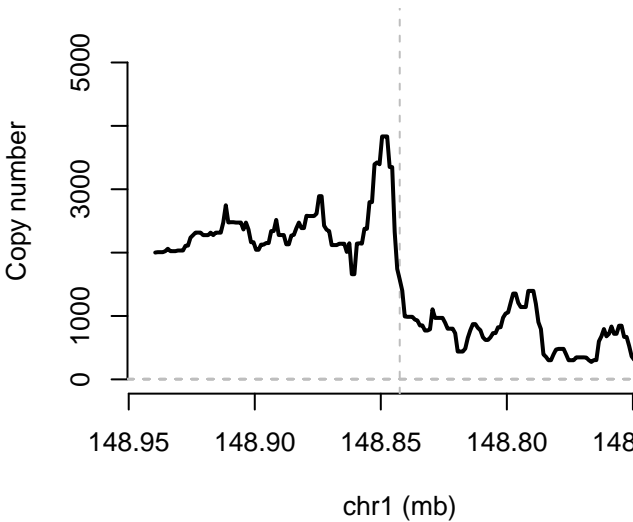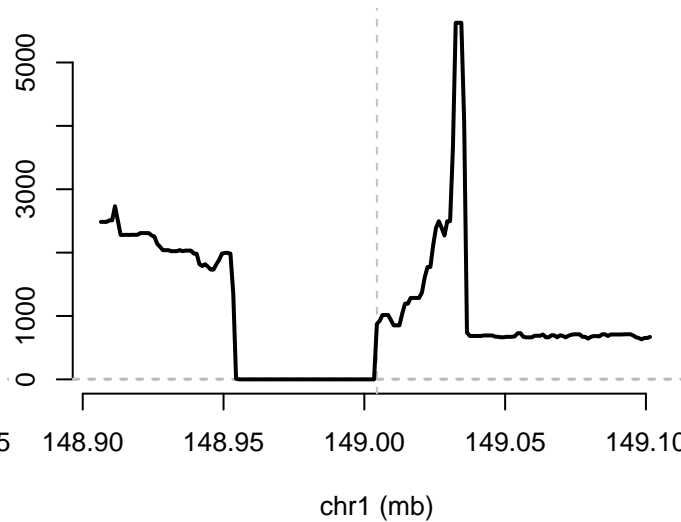

K562 chr1:149,004,457::chr1:148,842,489--

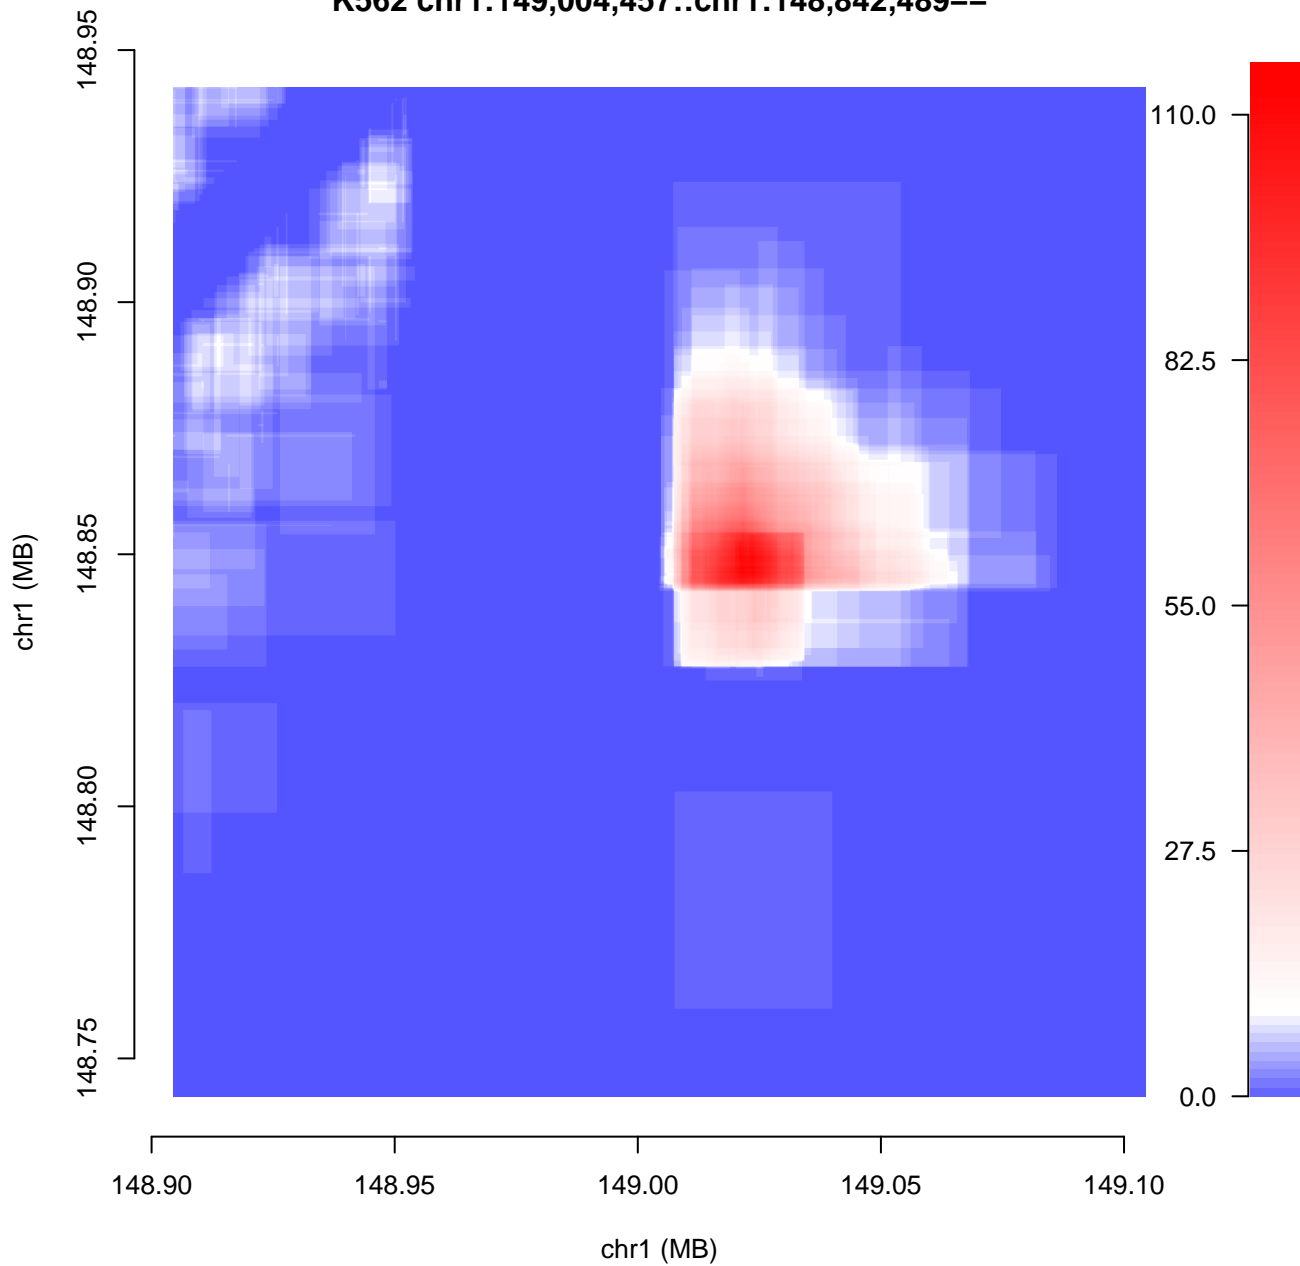

Supplement: Supplemental_Data.zip [file event_420.pdf › event_420.pdf]

Barcode

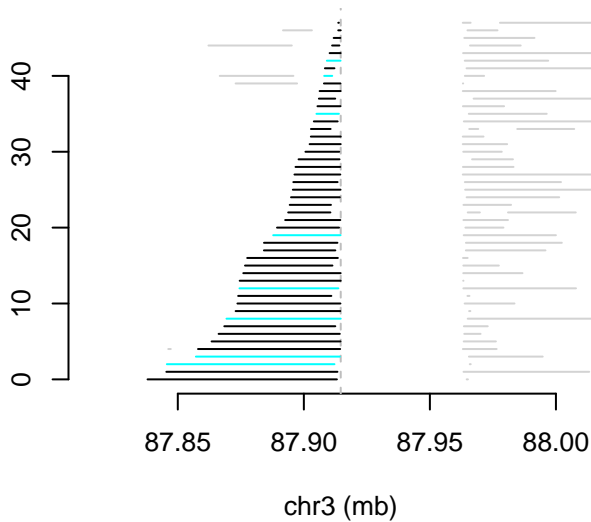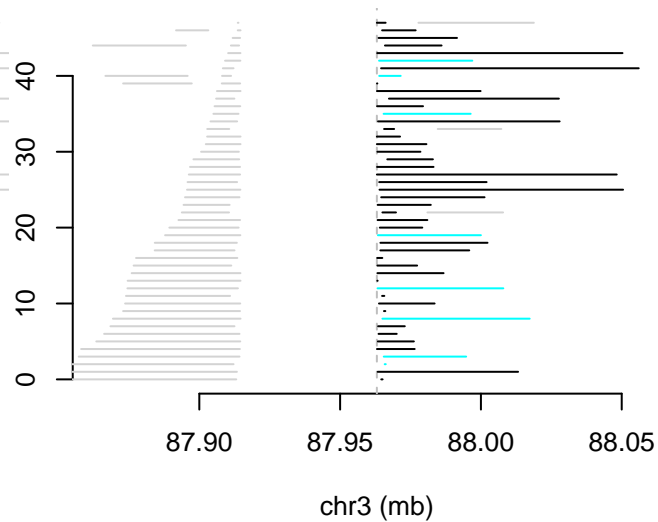

Copy number

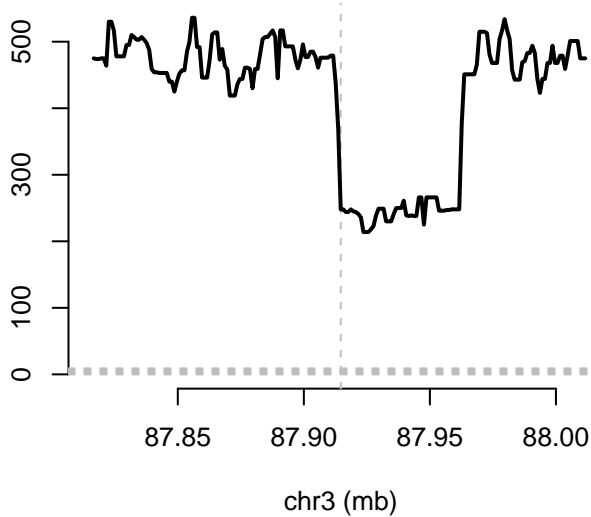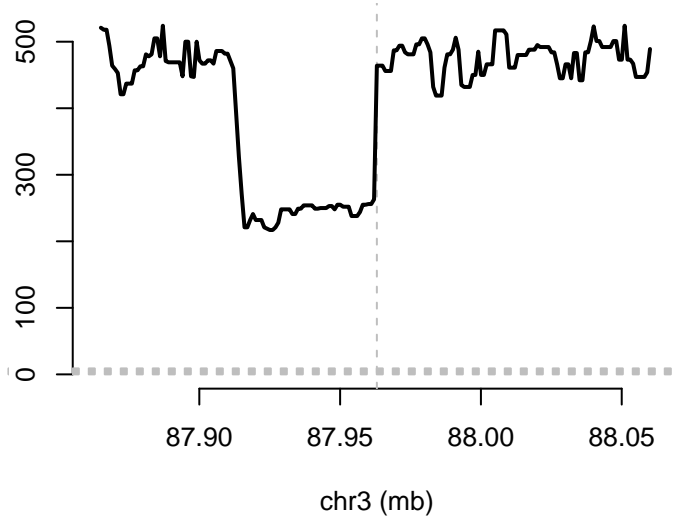

K562 chr3:87,914,639::chr3:87,963,048+-

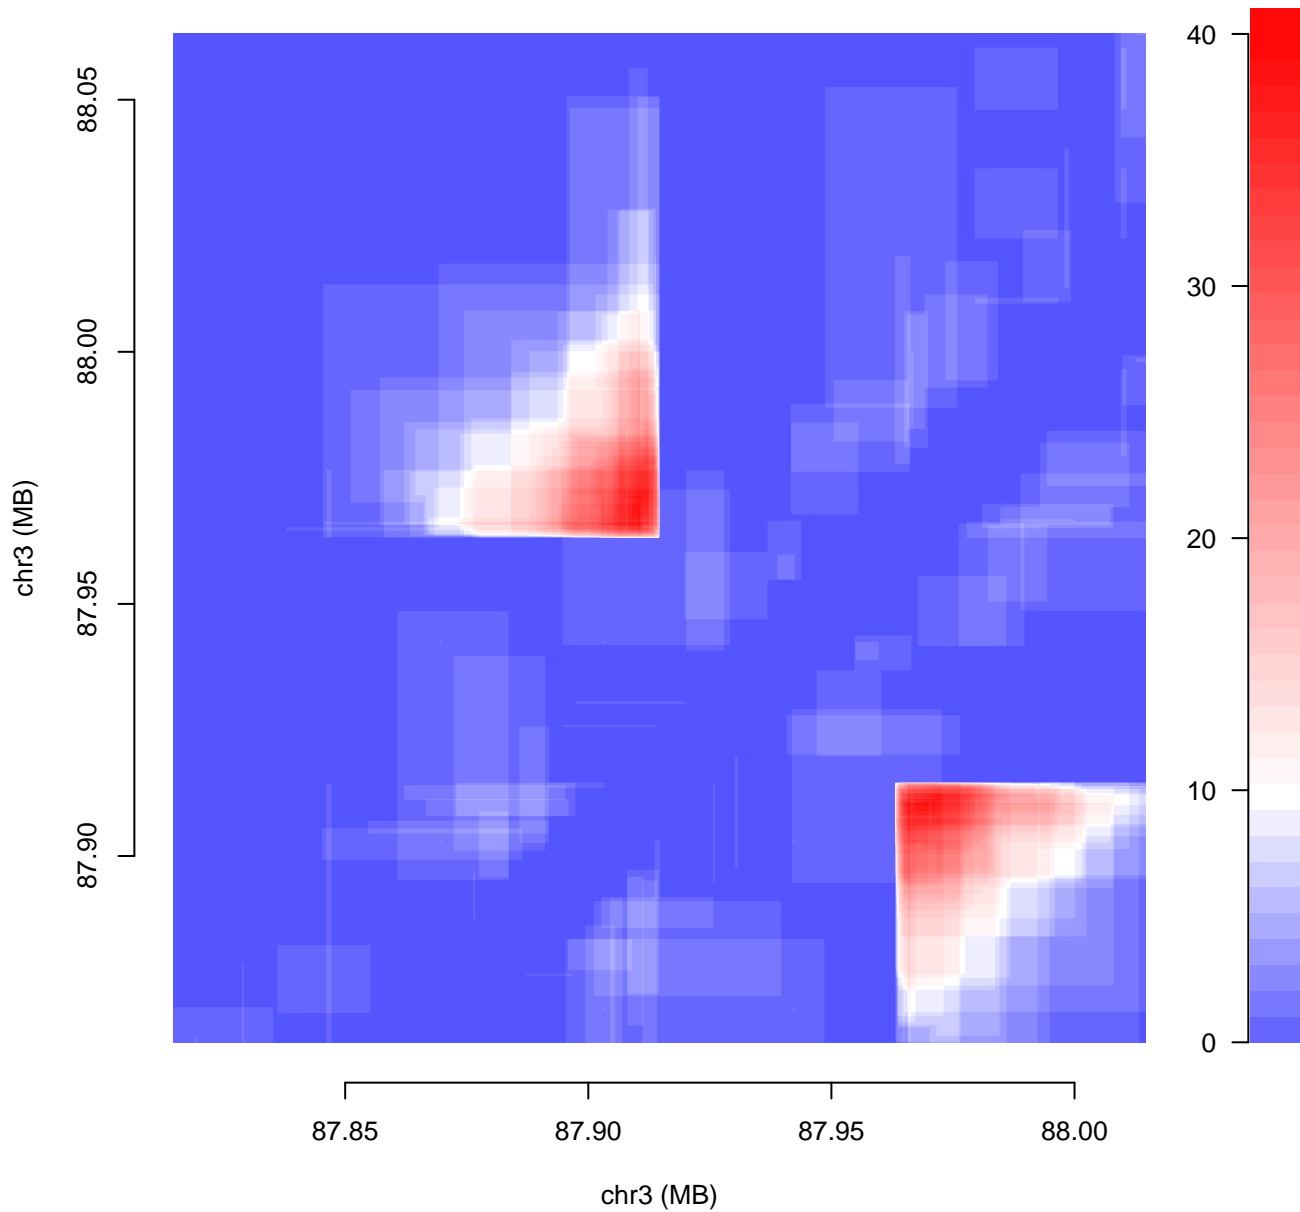

Supplement: Supplemental_Data.zip [file event_421.pdf › event_421.pdf]

Barcode

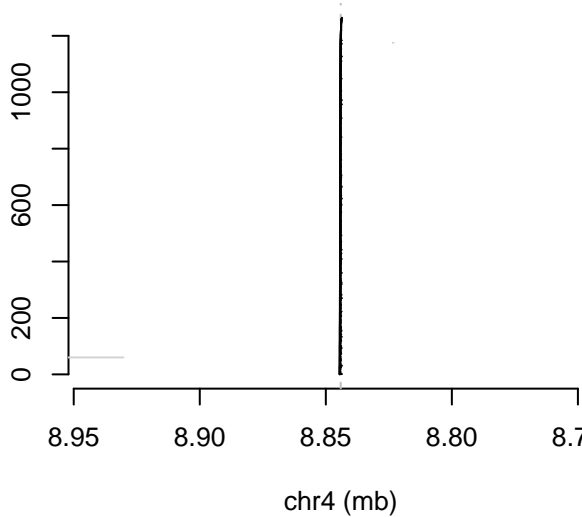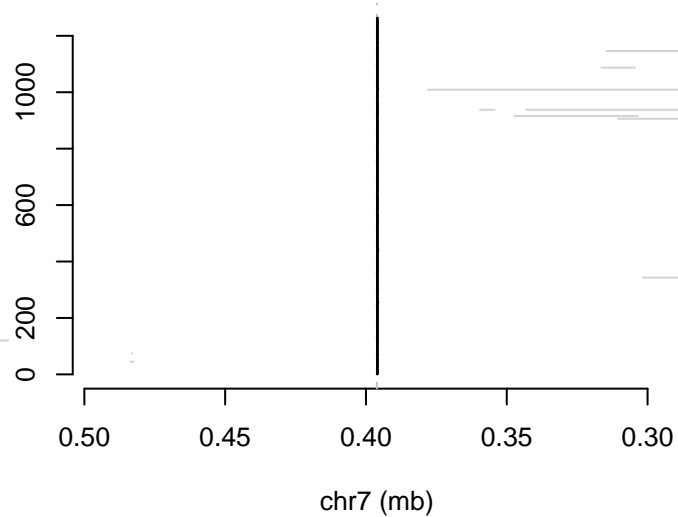

Copy number

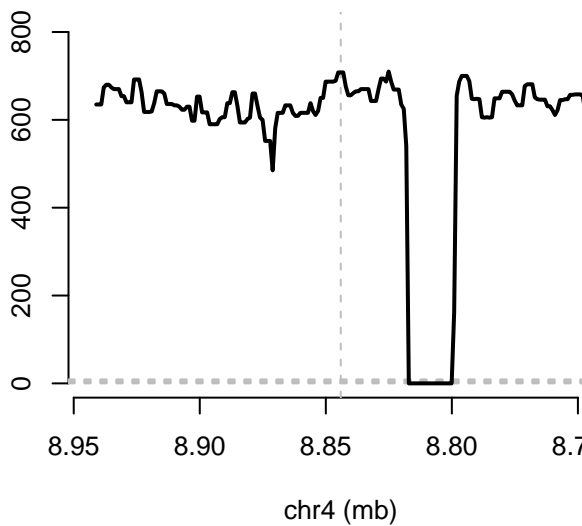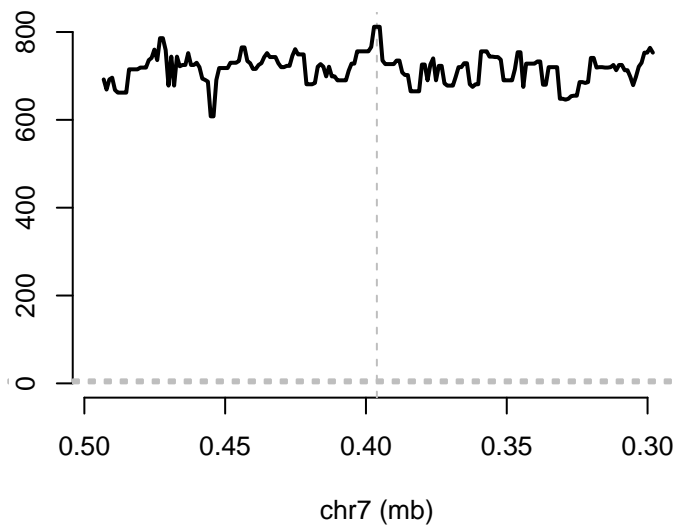

K562 chr7:396,124::chr4:8,844,080+-

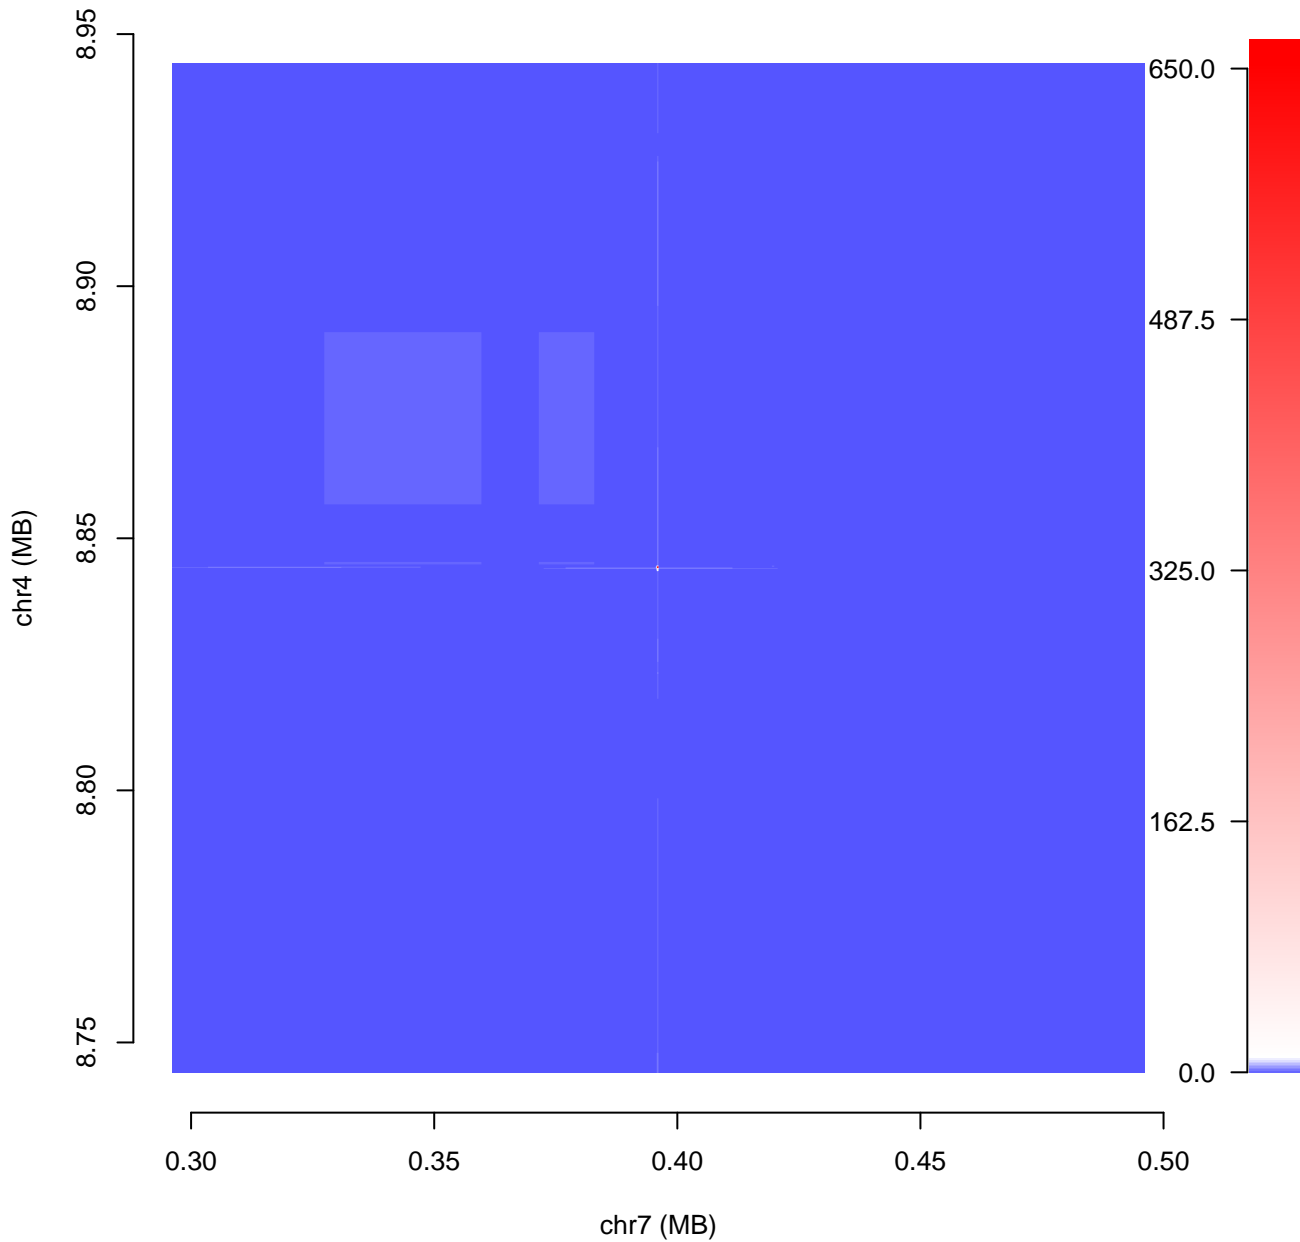

Supplement: Supplemental_Data.zip [file event_422.pdf › event_422.pdf]

Barcode

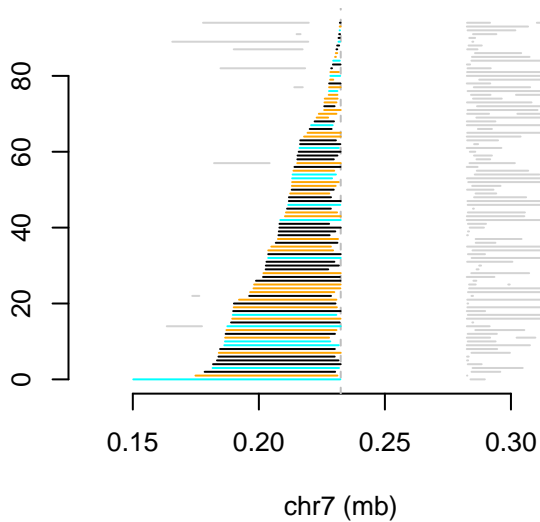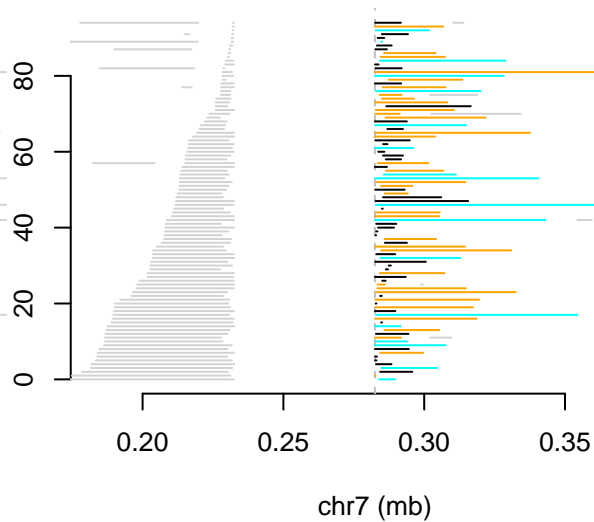

Copy number

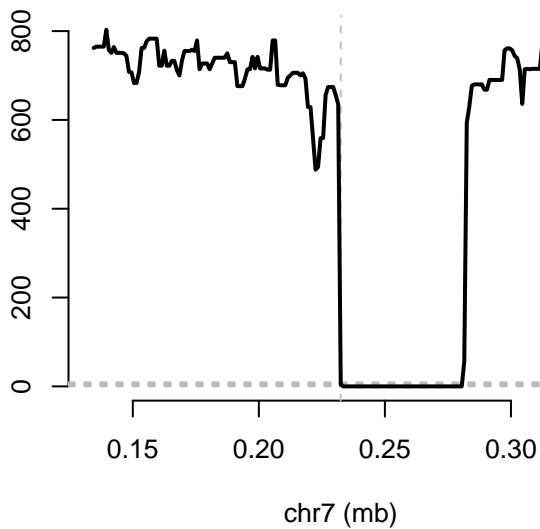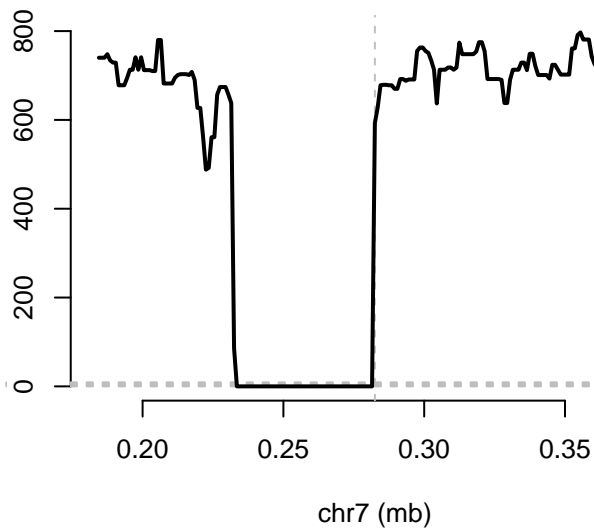

K562 chr7:282,479::chr7:232,484-+

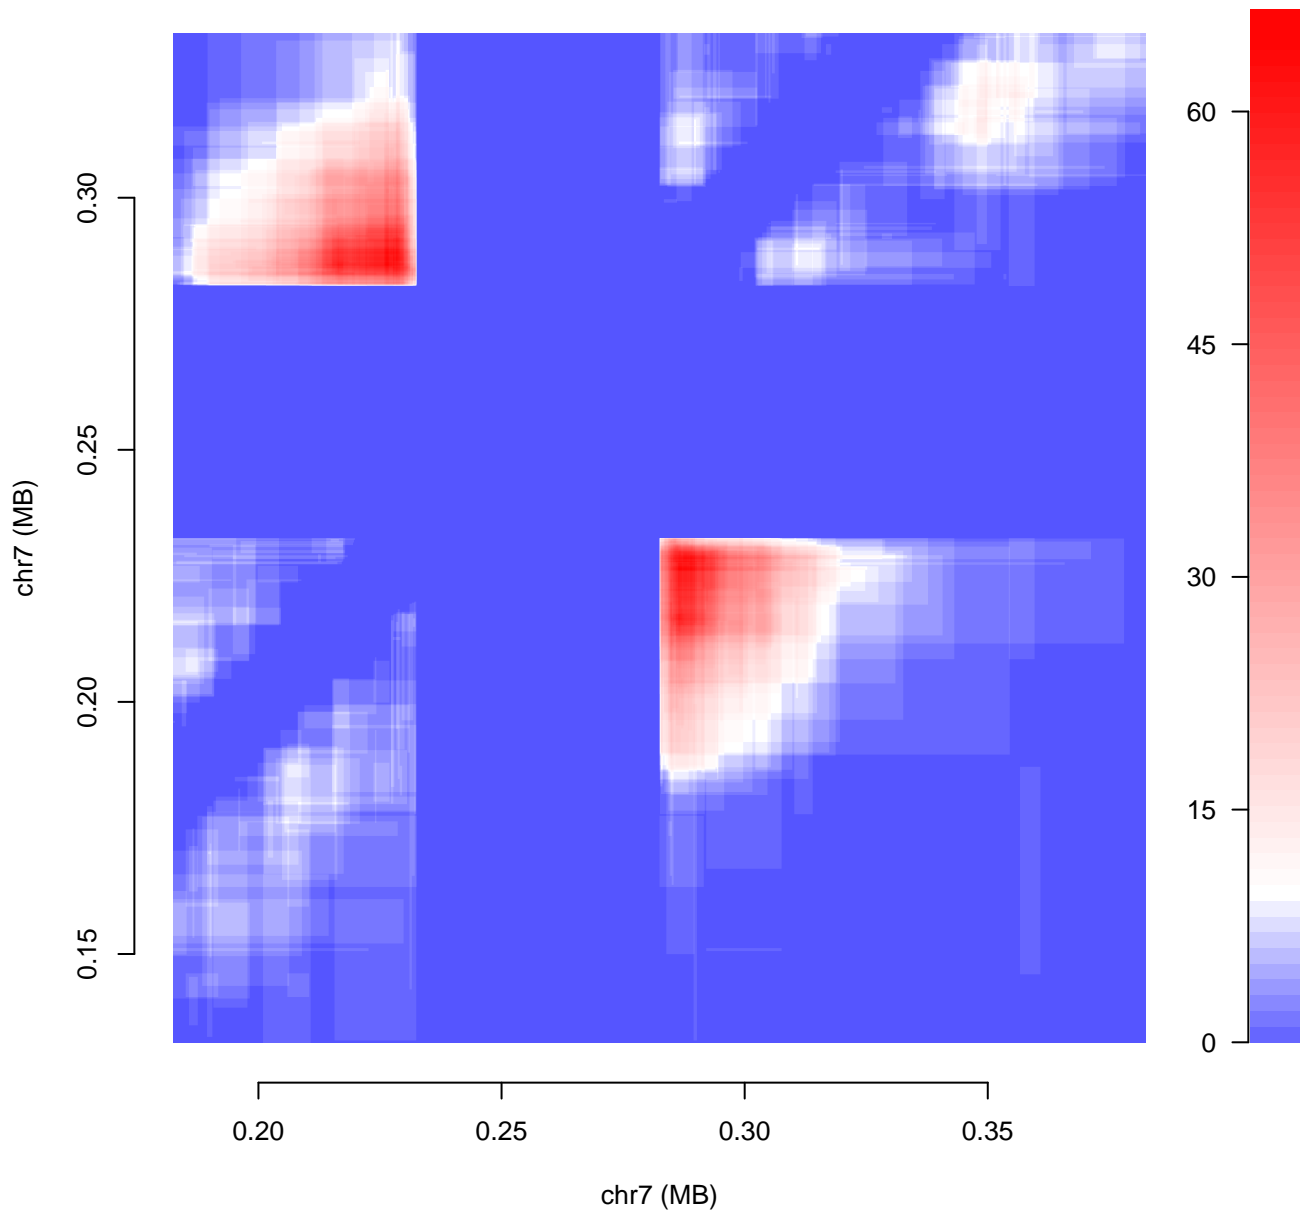

Supplement: Supplemental_Data.zip [file event_423.pdf › event_423.pdf]

Barcode

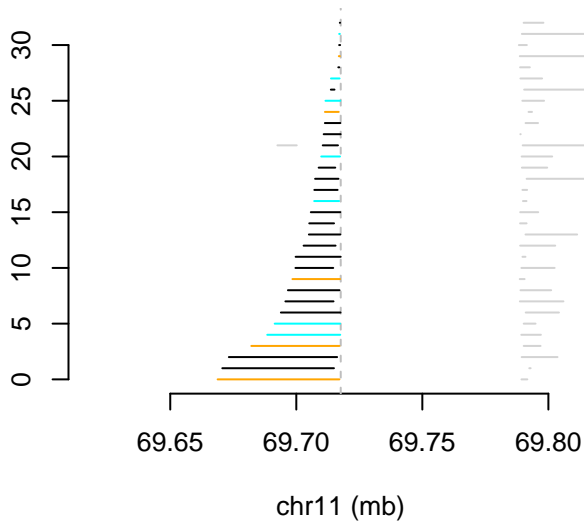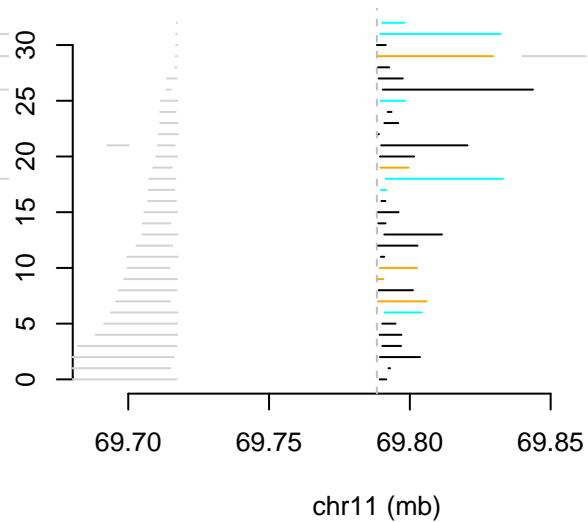

Copy number

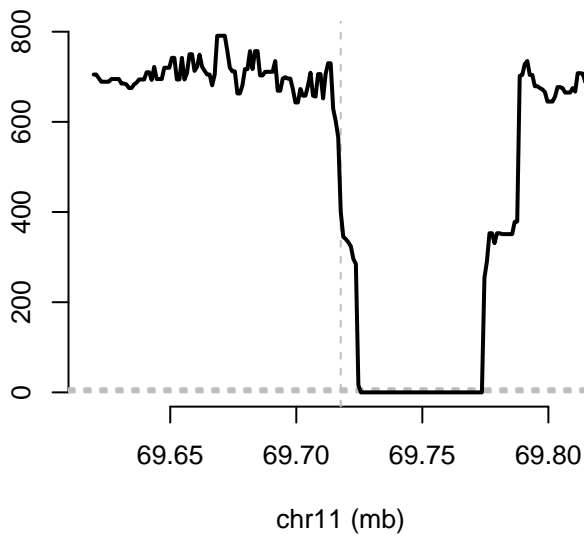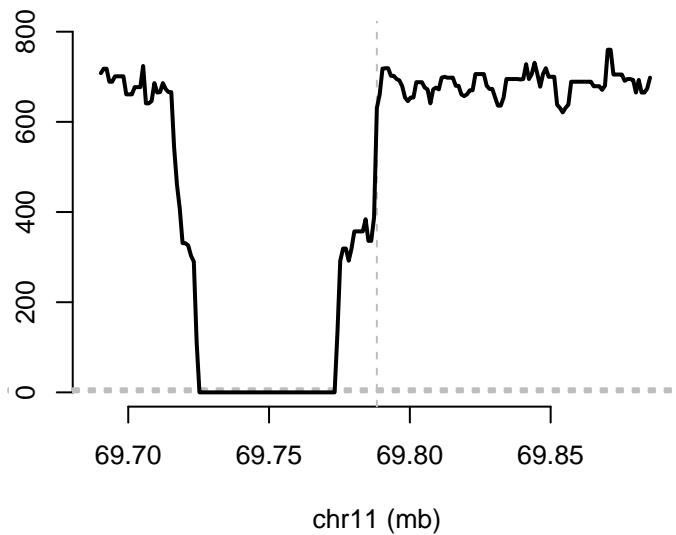

K562 chr11:69,788,288::chr11:69,717,630-+

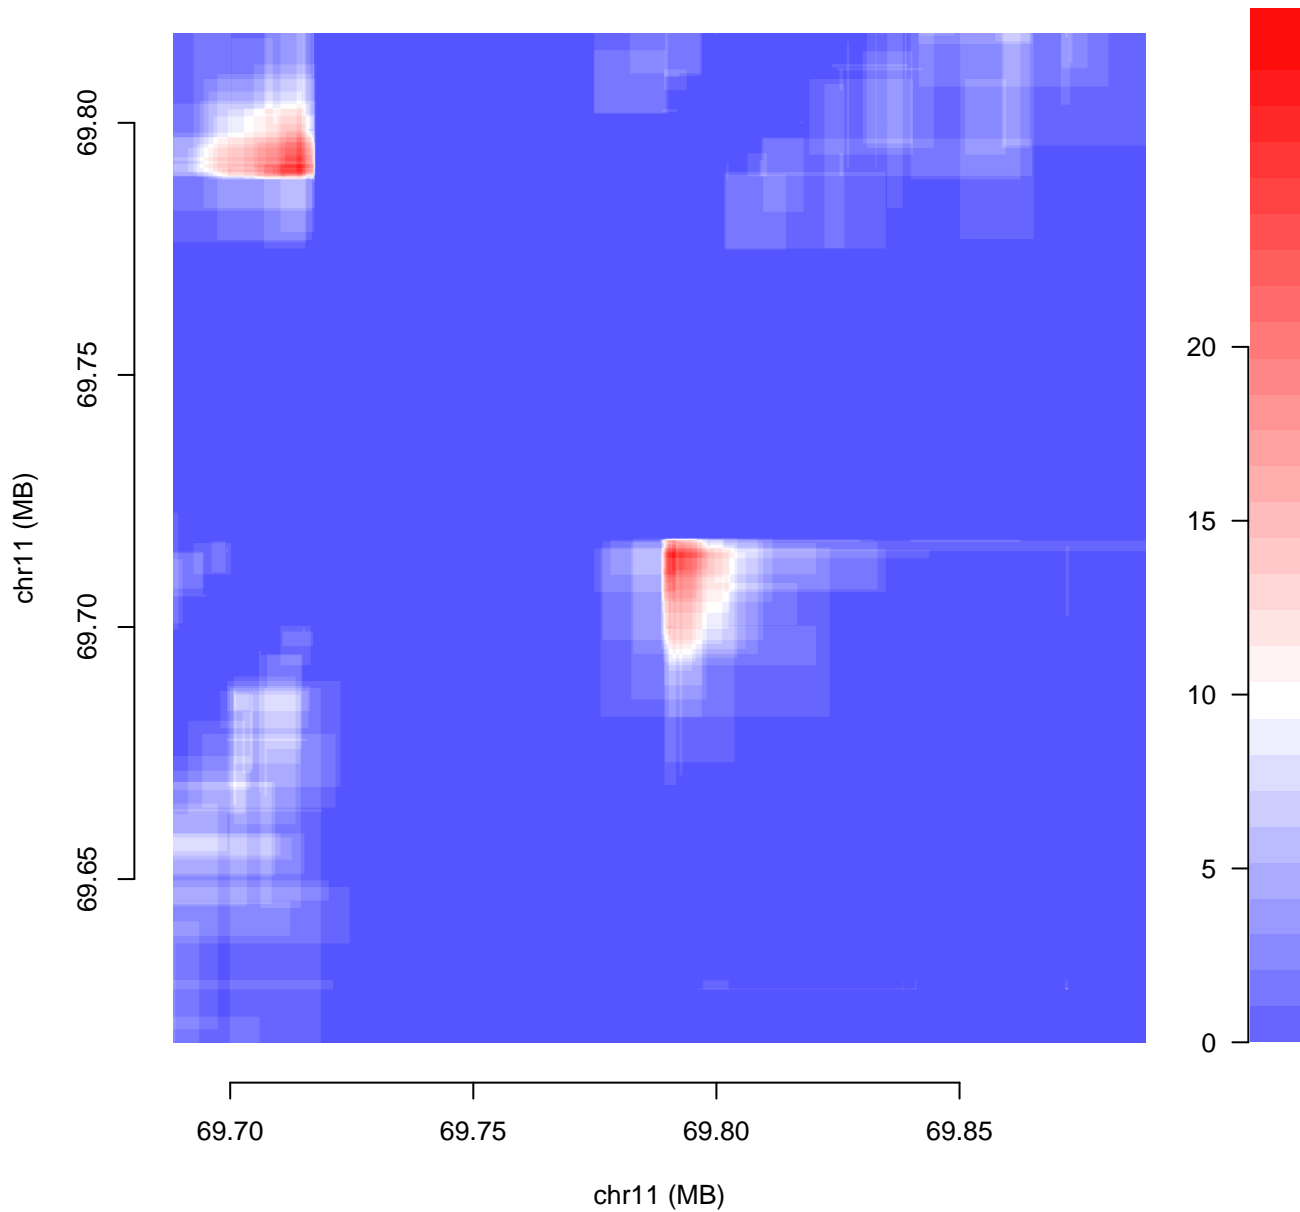

Supplement: Supplemental_Data.zip [file event_424.pdf › event_424.pdf]

Barcode

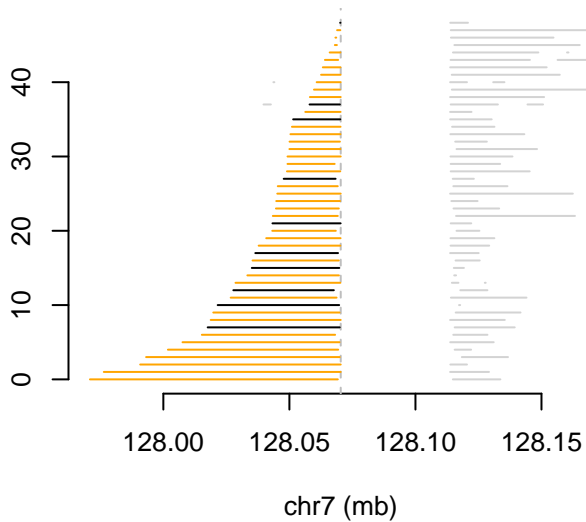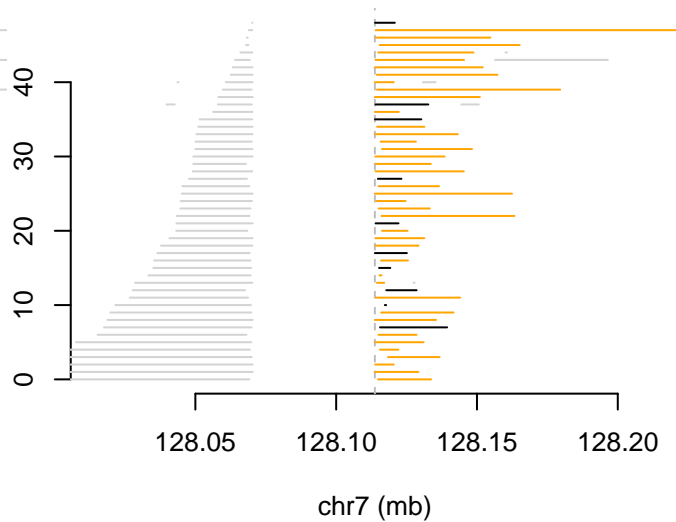

Copy number

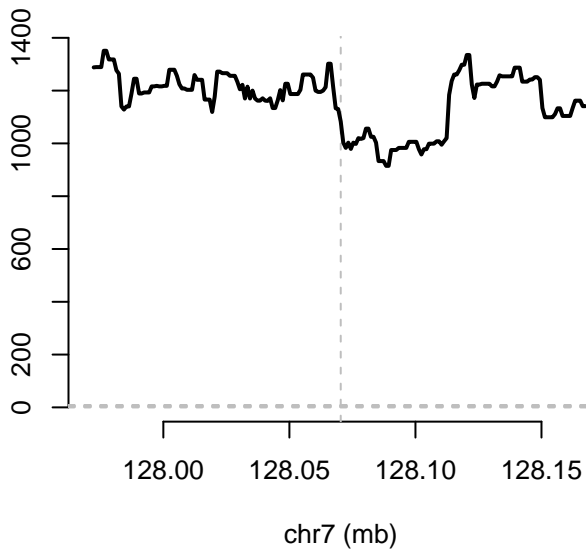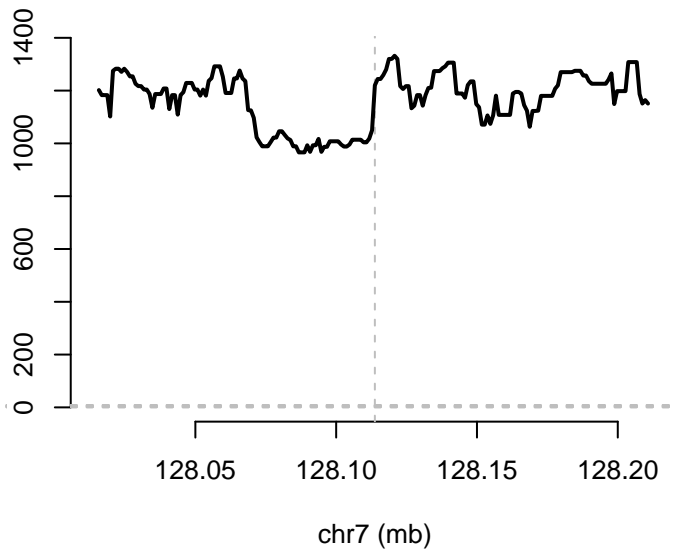

K562 chr7:128,070,369::chr7:128,113,744+-

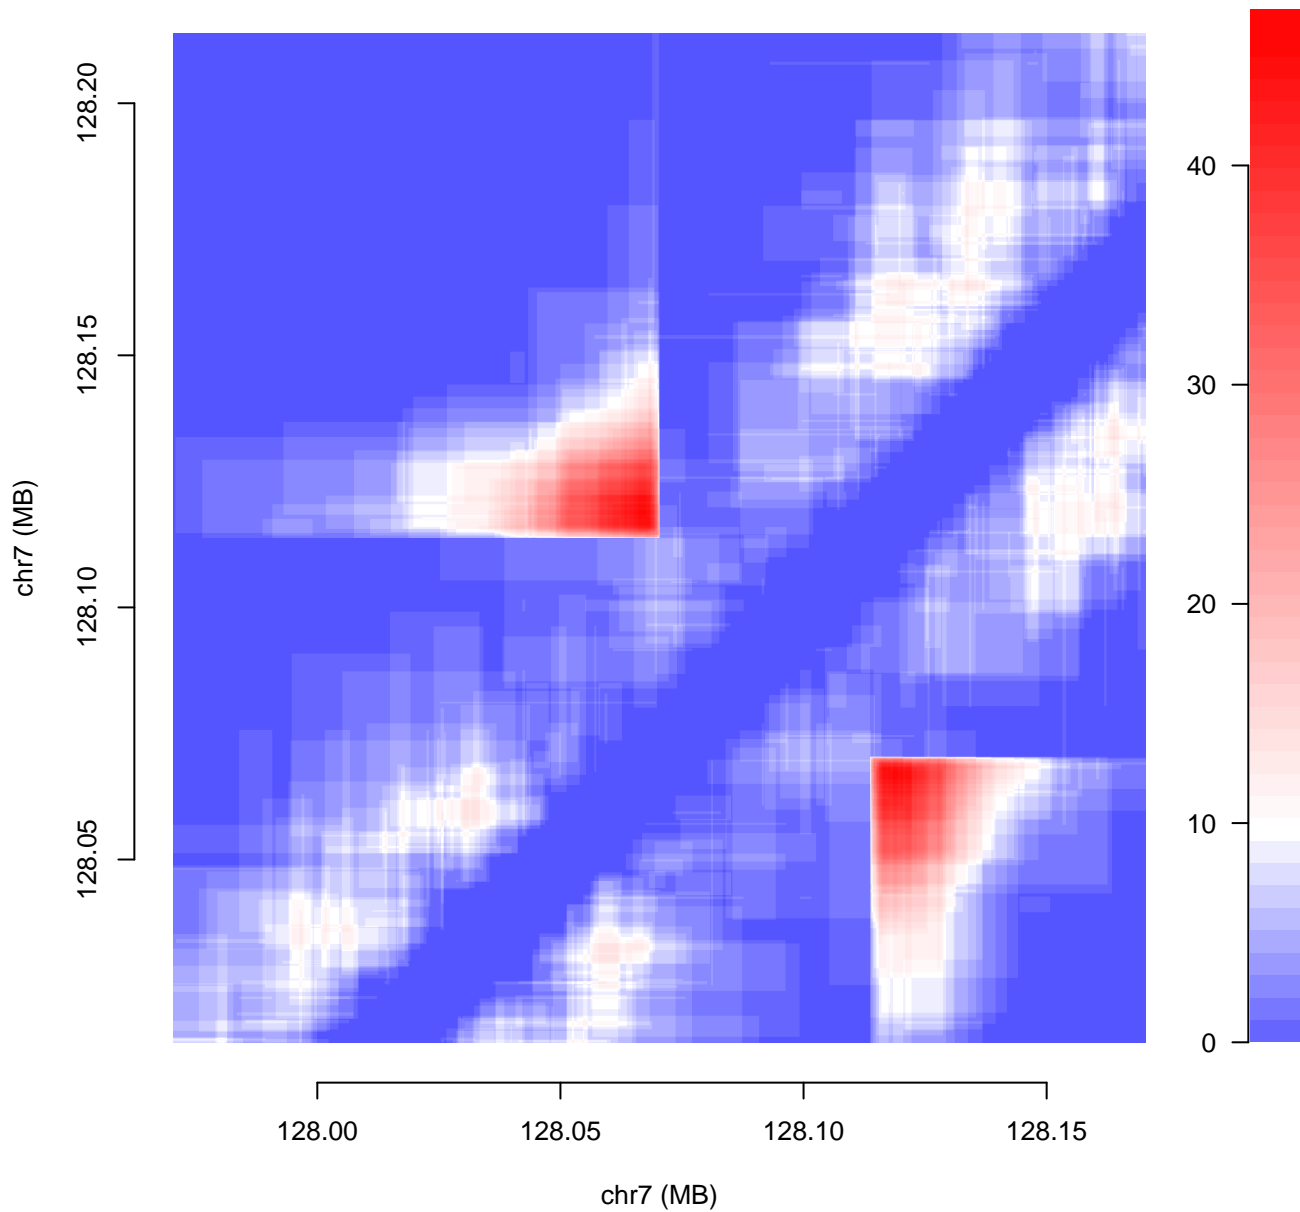

Supplement: Supplemental_Data.zip [file event_425.pdf › event_425.pdf]

Barcode

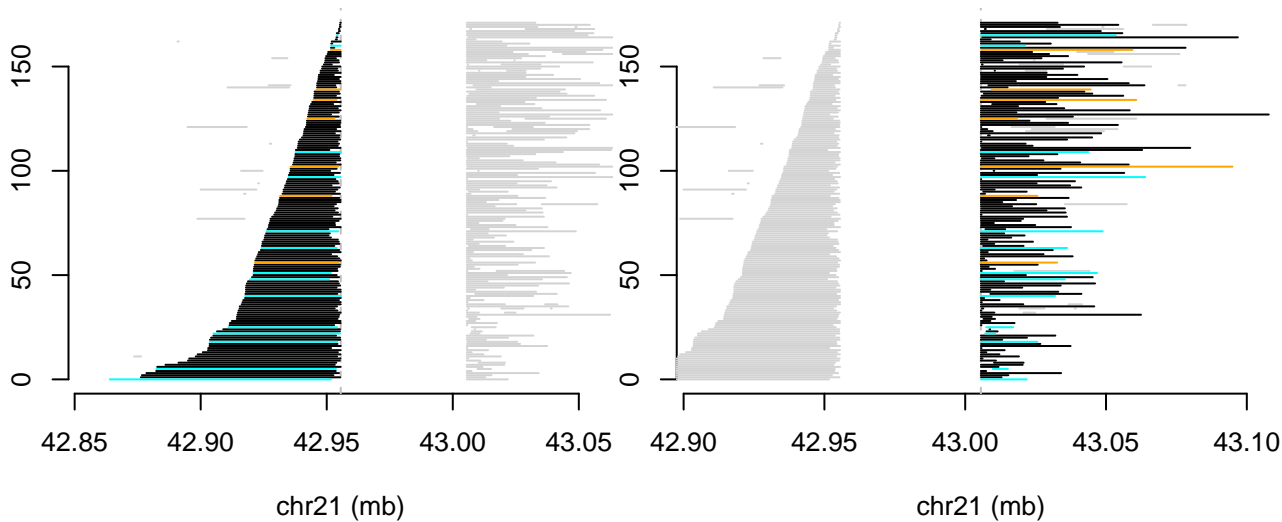

Copy number

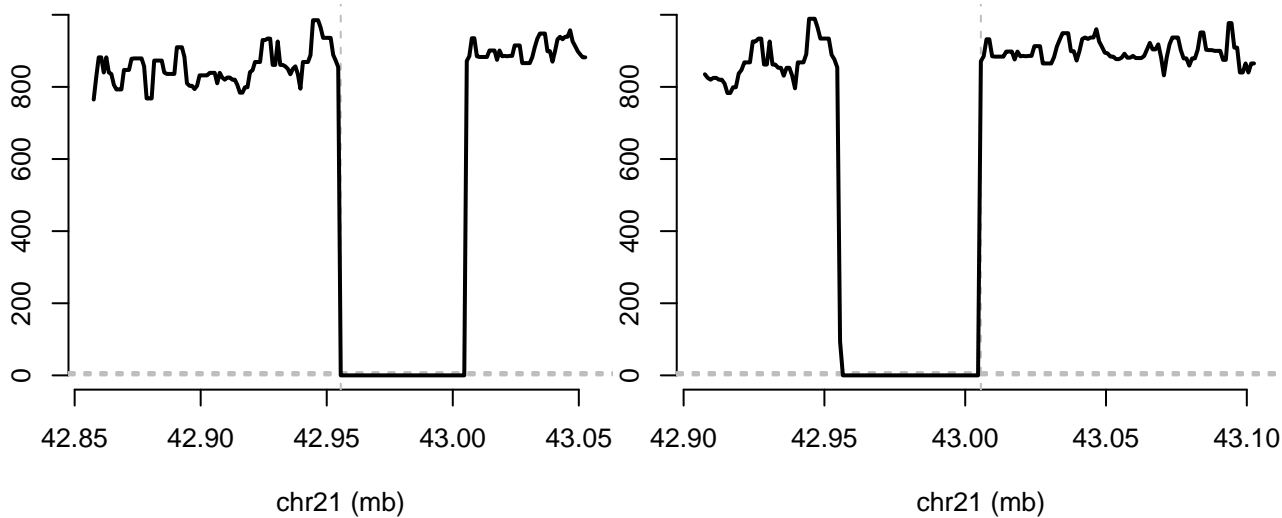

K562 chr21:42,955,559::chr21:43,005,557+-

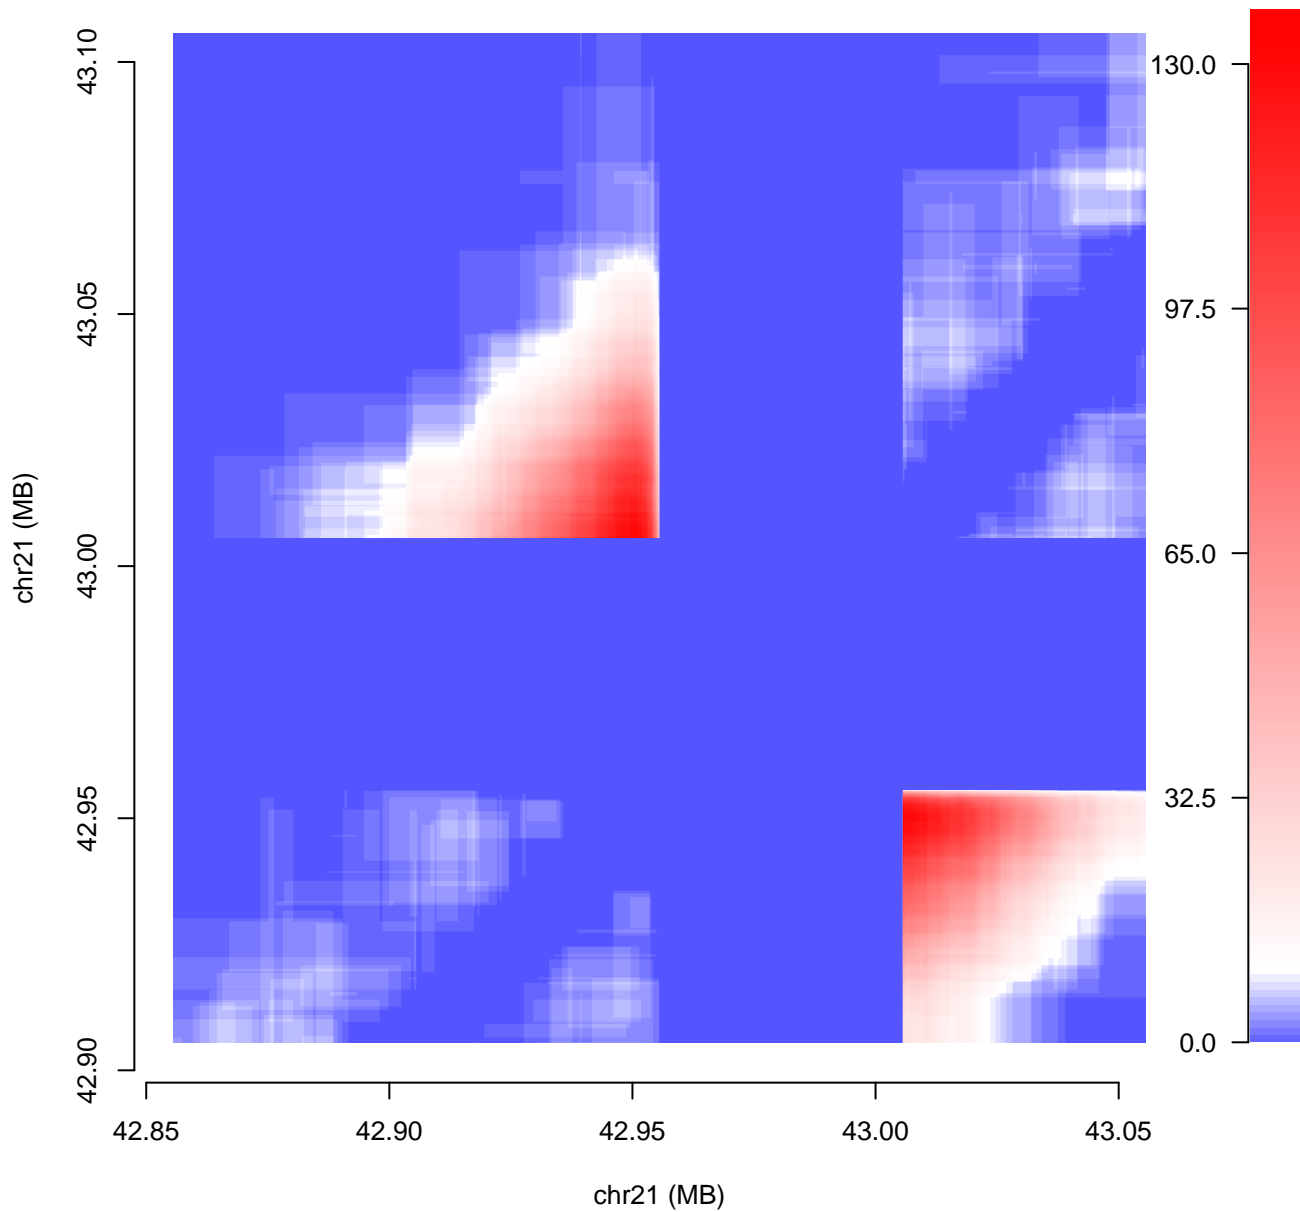

Supplement: Supplemental_Data.zip [file event_426.pdf › event_426.pdf]

Barcode

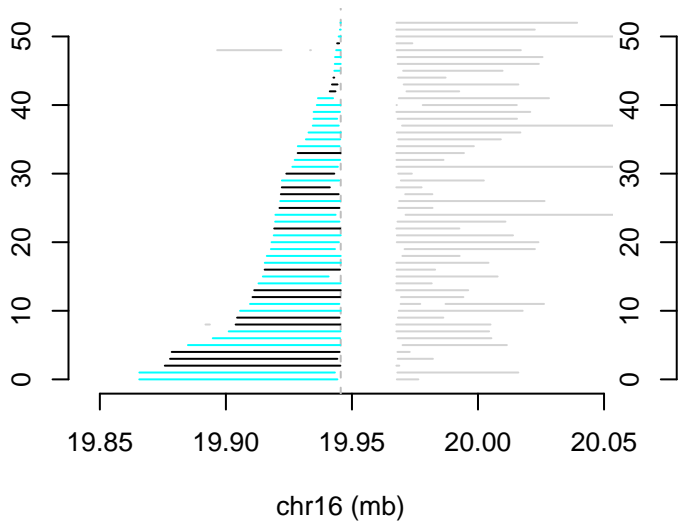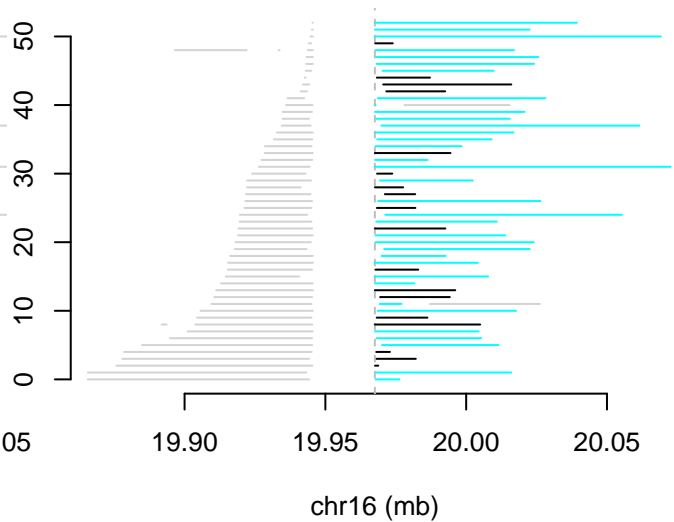

Copy number

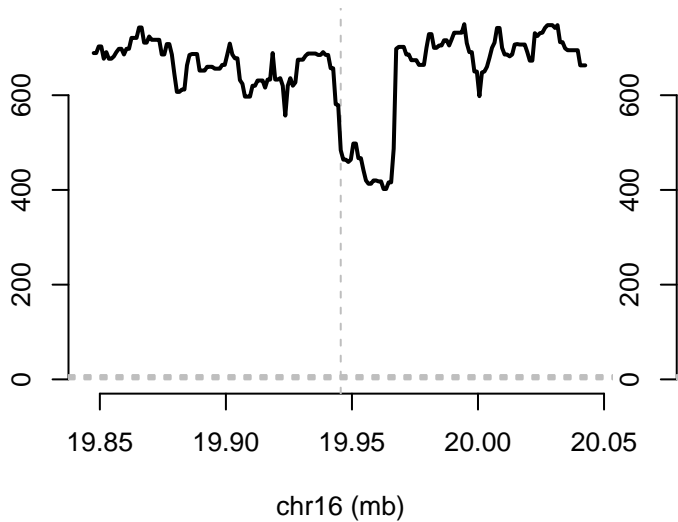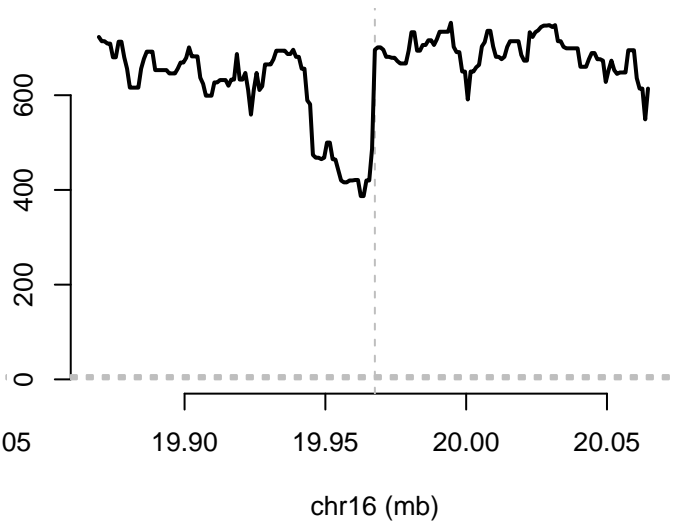

K562 chr16:19,967,579::chr16:19,945,554-+

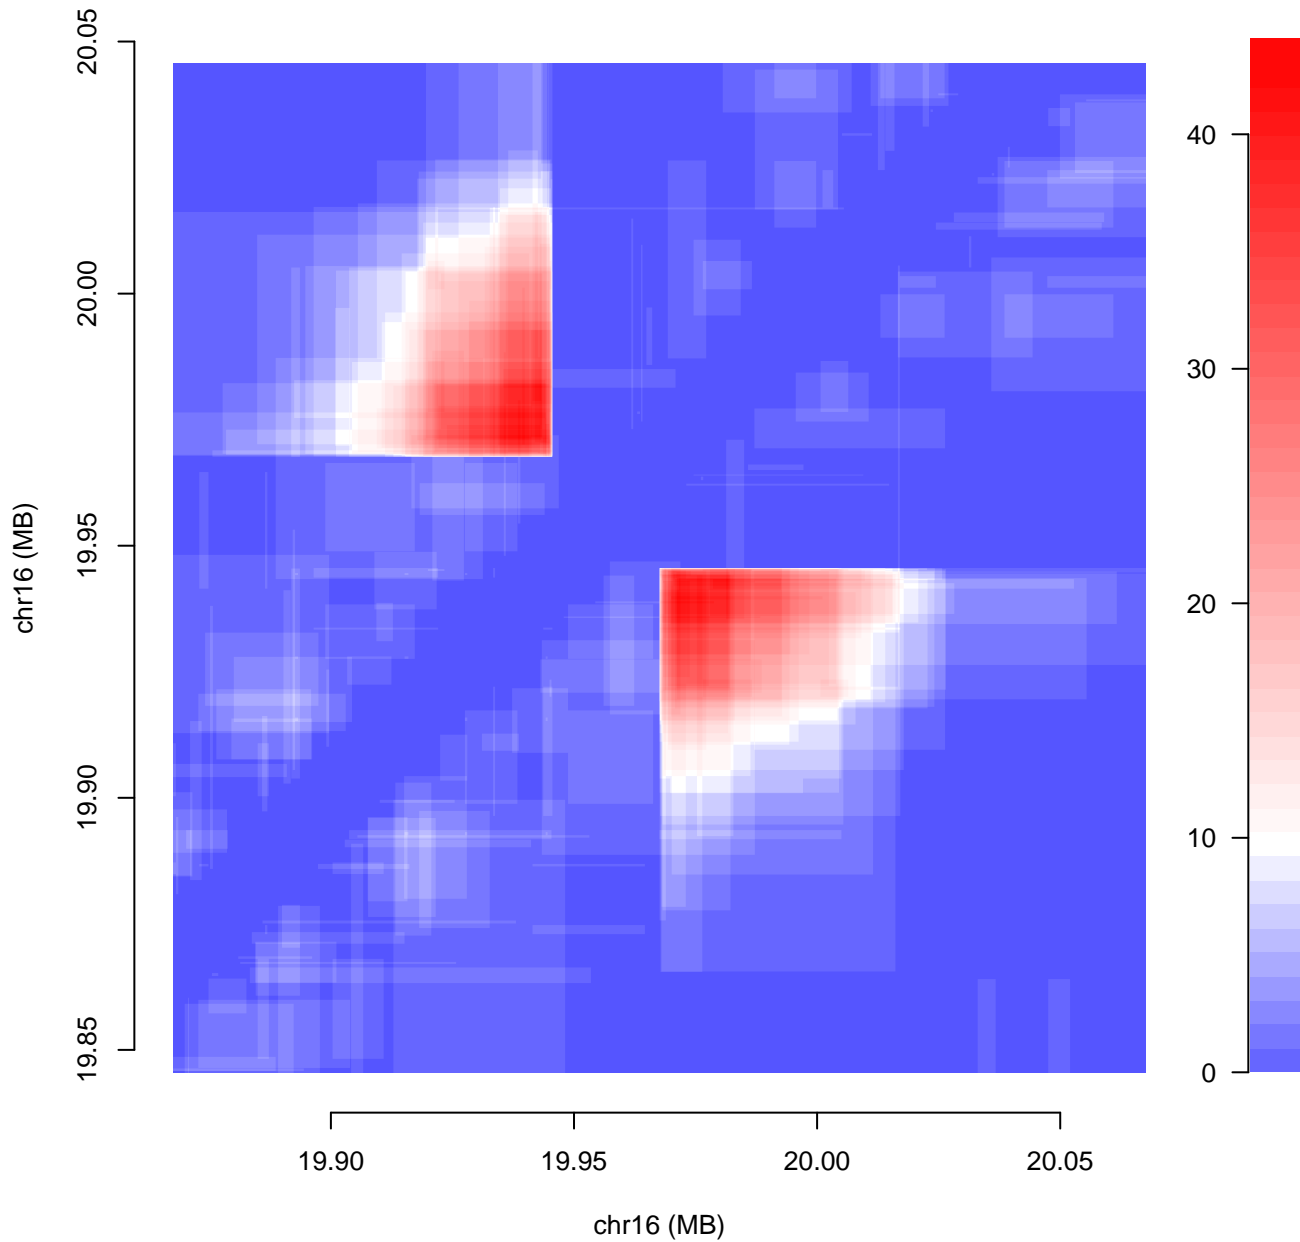

Supplement: Supplemental_Data.zip [file event_427.pdf › event_427.pdf]

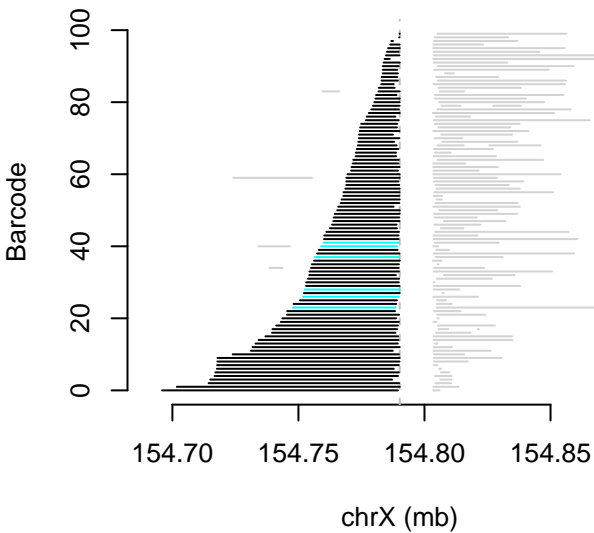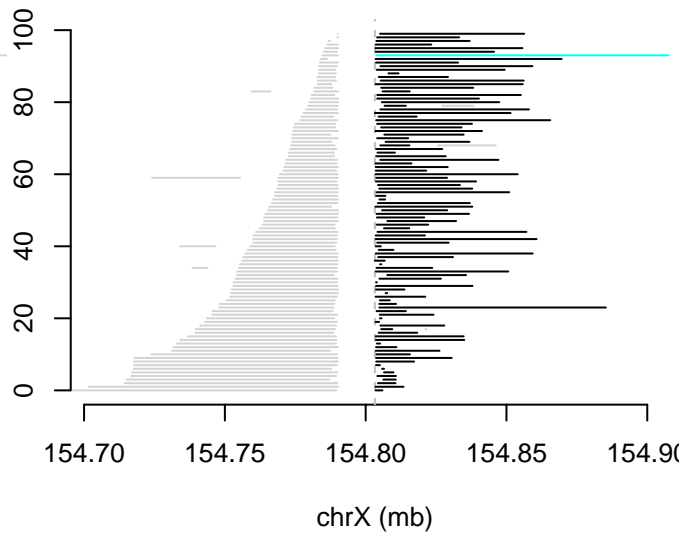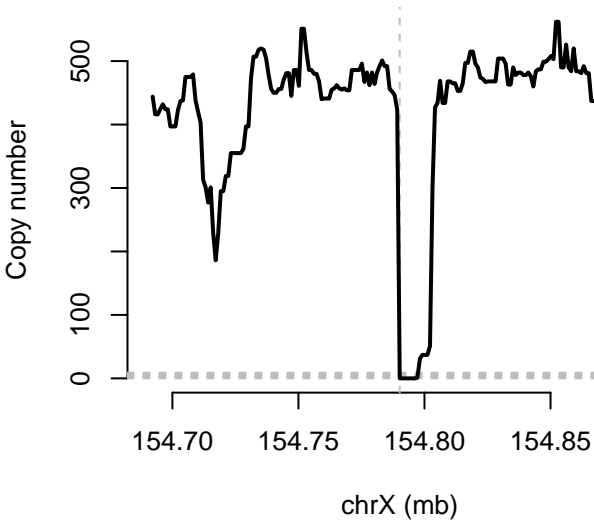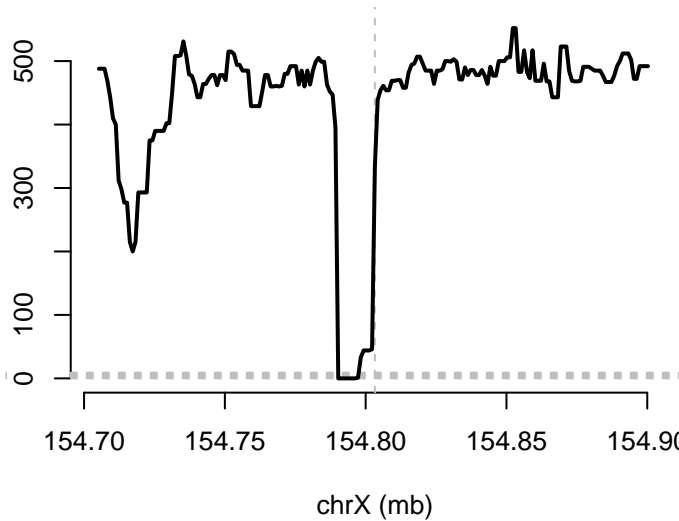

K562 chrX:154,803,270::chrX:154,790,189-+

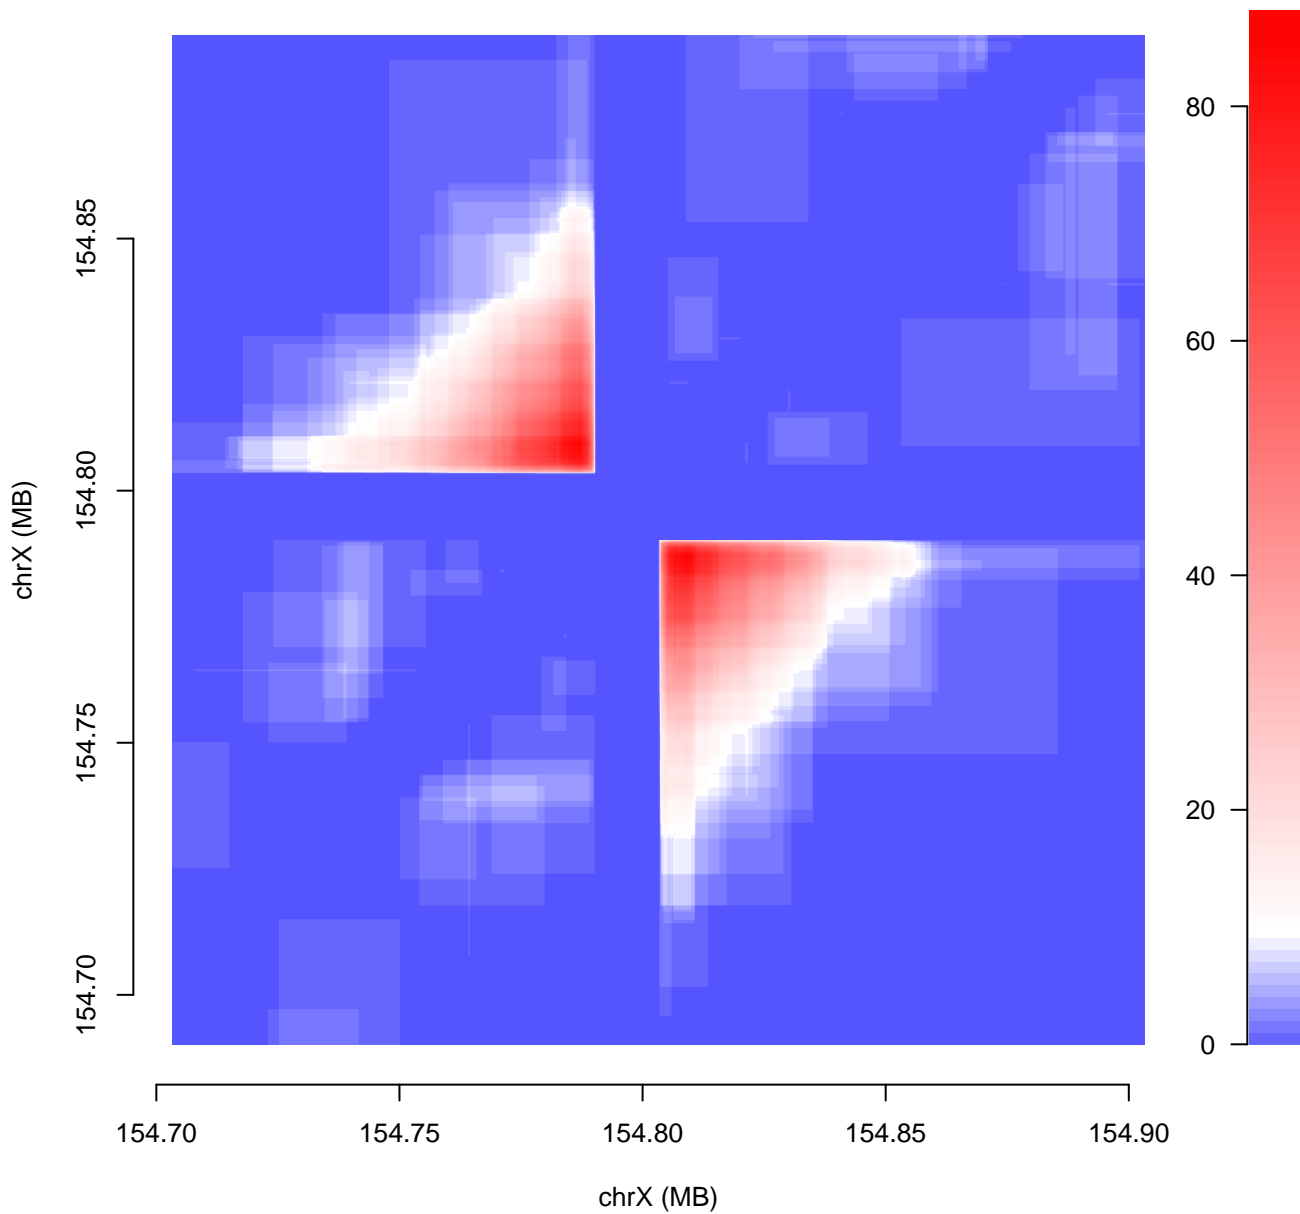

Supplement: Supplemental_Data.zip [file event_428.pdf › event_428.pdf]

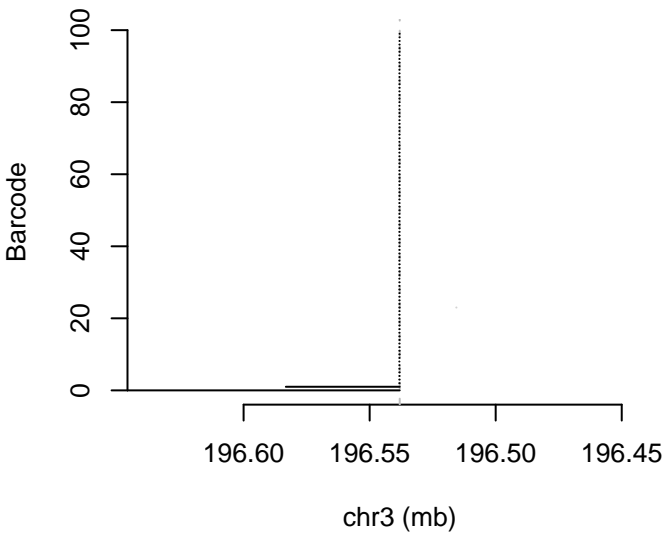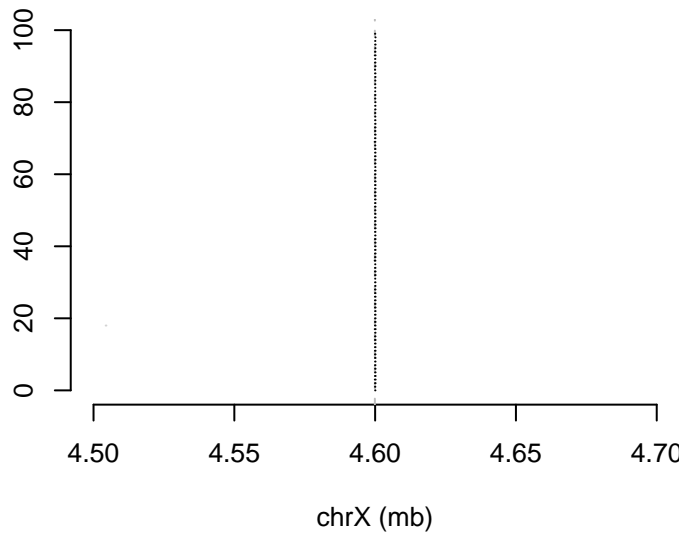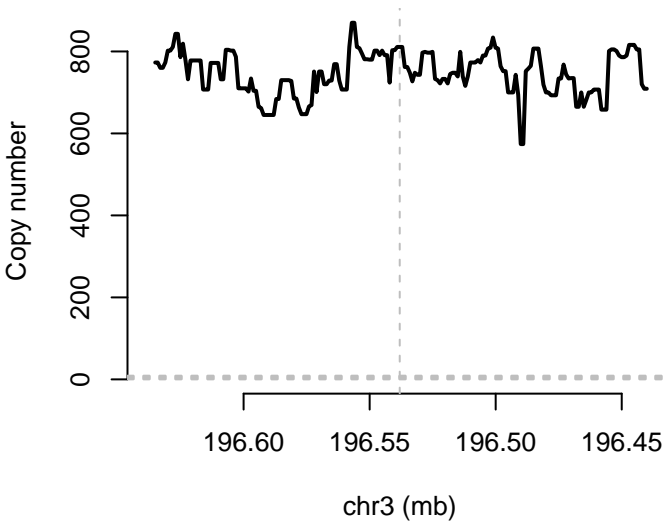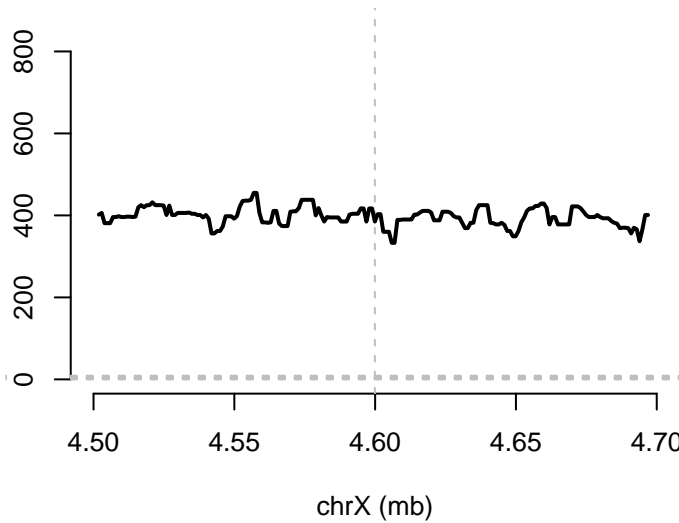

K562 chrX:4,599,903::chr3:196,538,061--

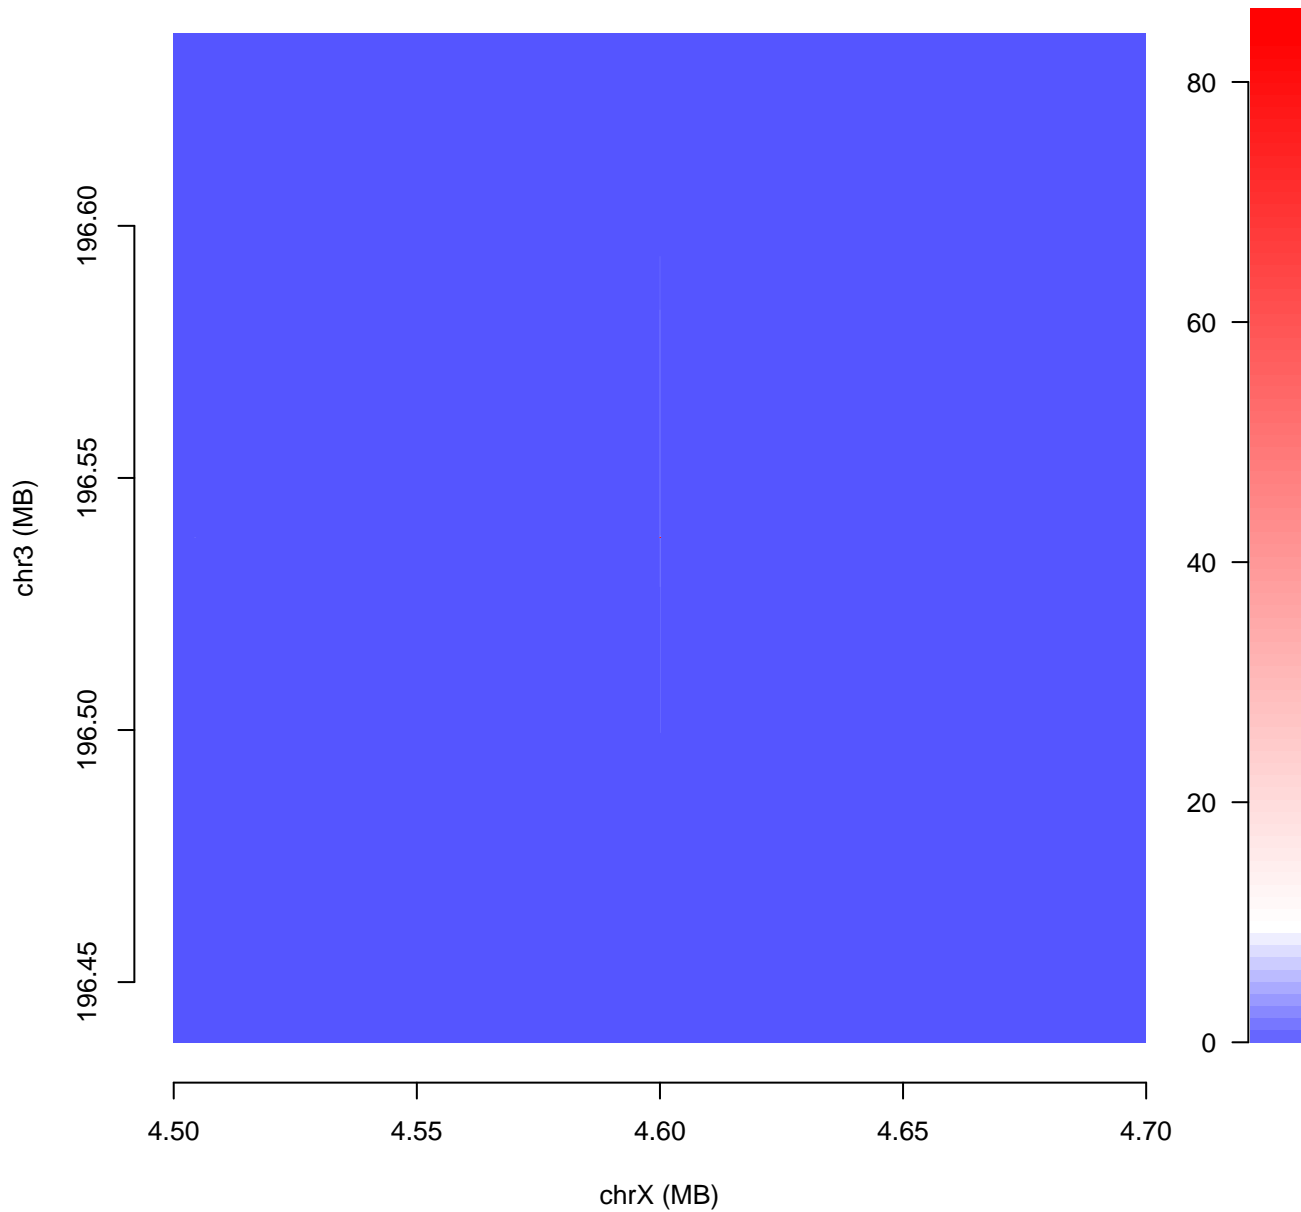

Supplement: Supplemental_Data.zip [file event_429.pdf › event_429.pdf]

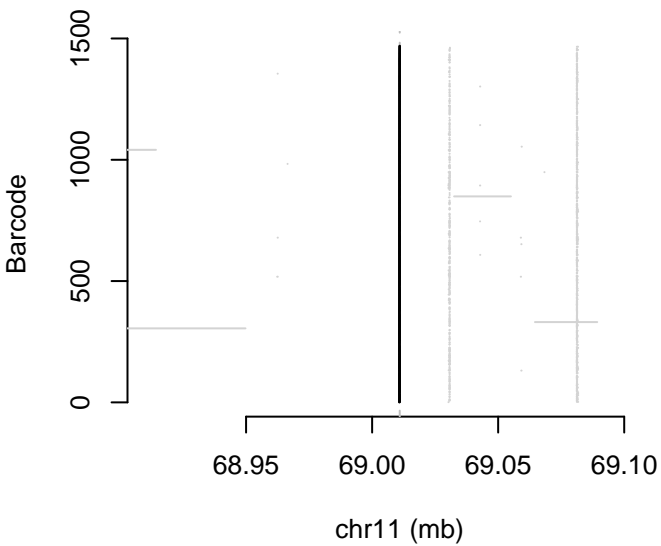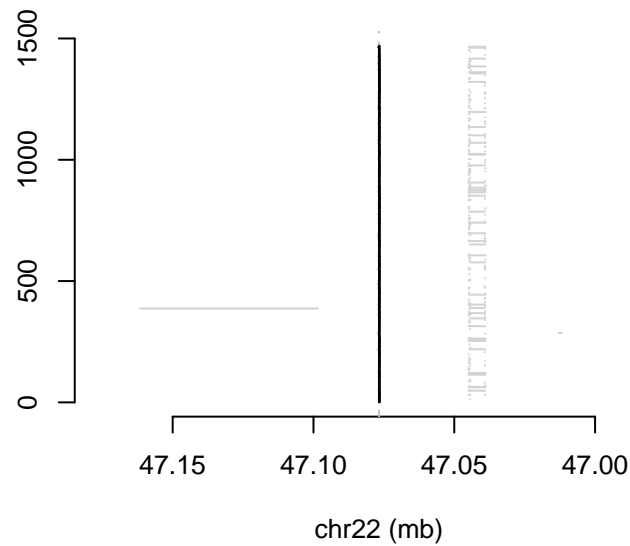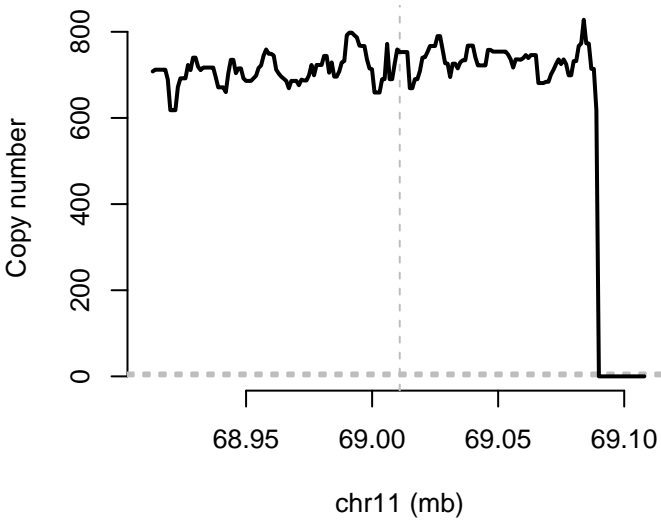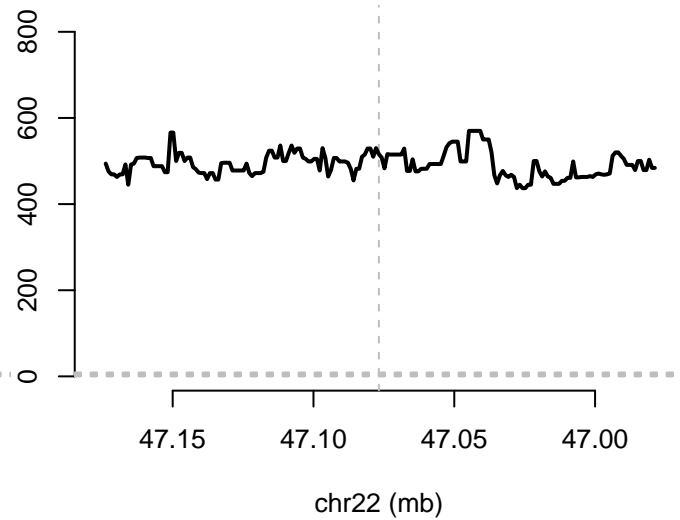

K562 chr11:69,010,957::chr22:47,076,779++

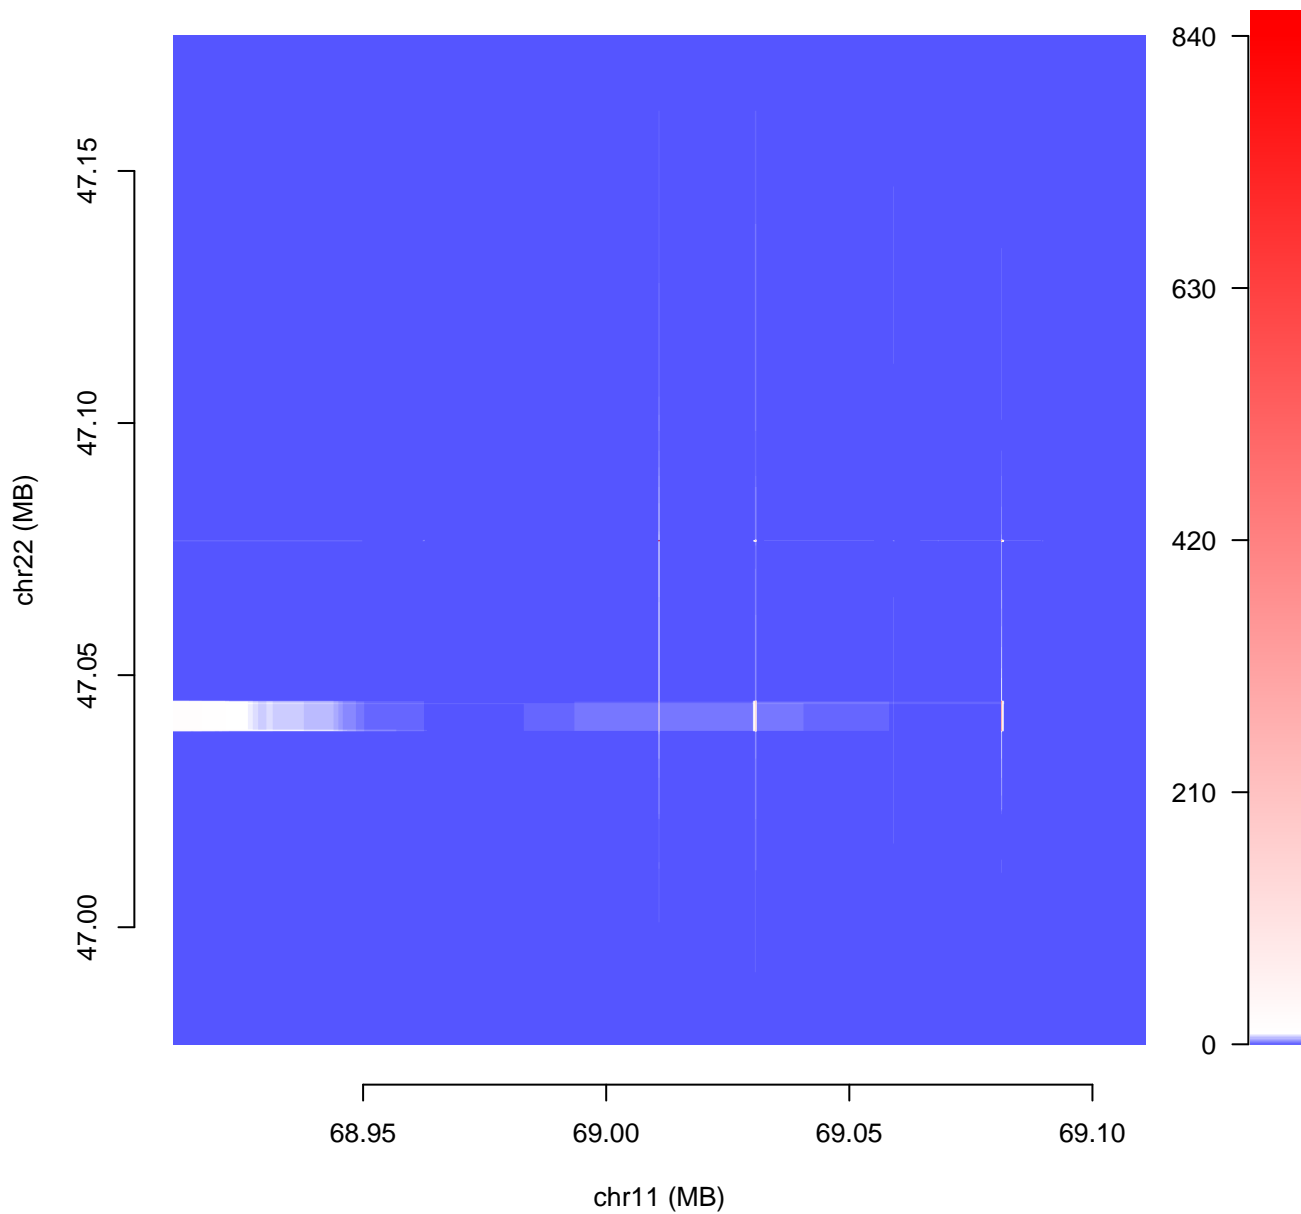

Supplement: Supplemental_Data.zip [file event_43.pdf › event_43.pdf]

Barcode

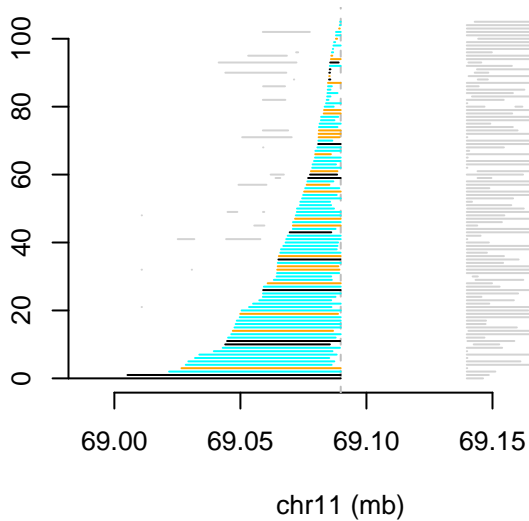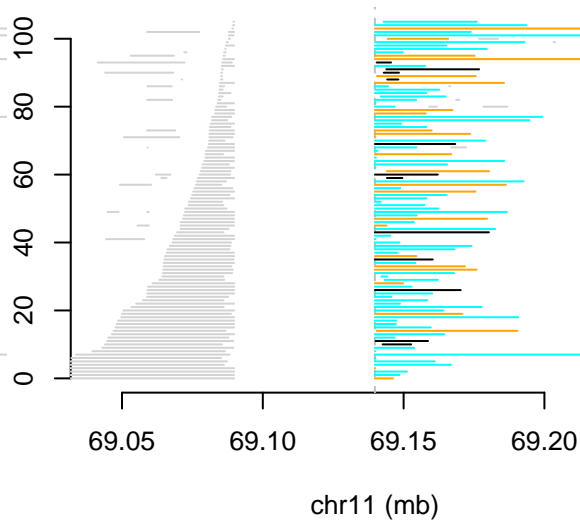

Copy number

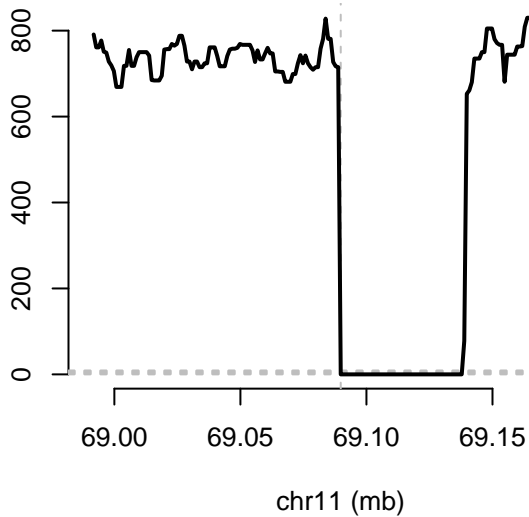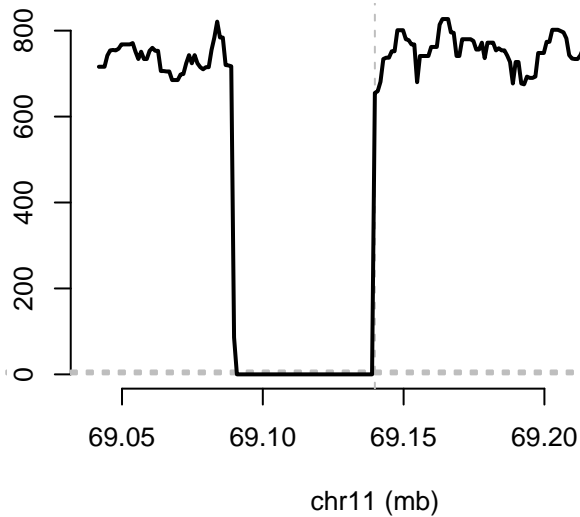

K562 chr11:69,089,804::chr11:69,139,798+-

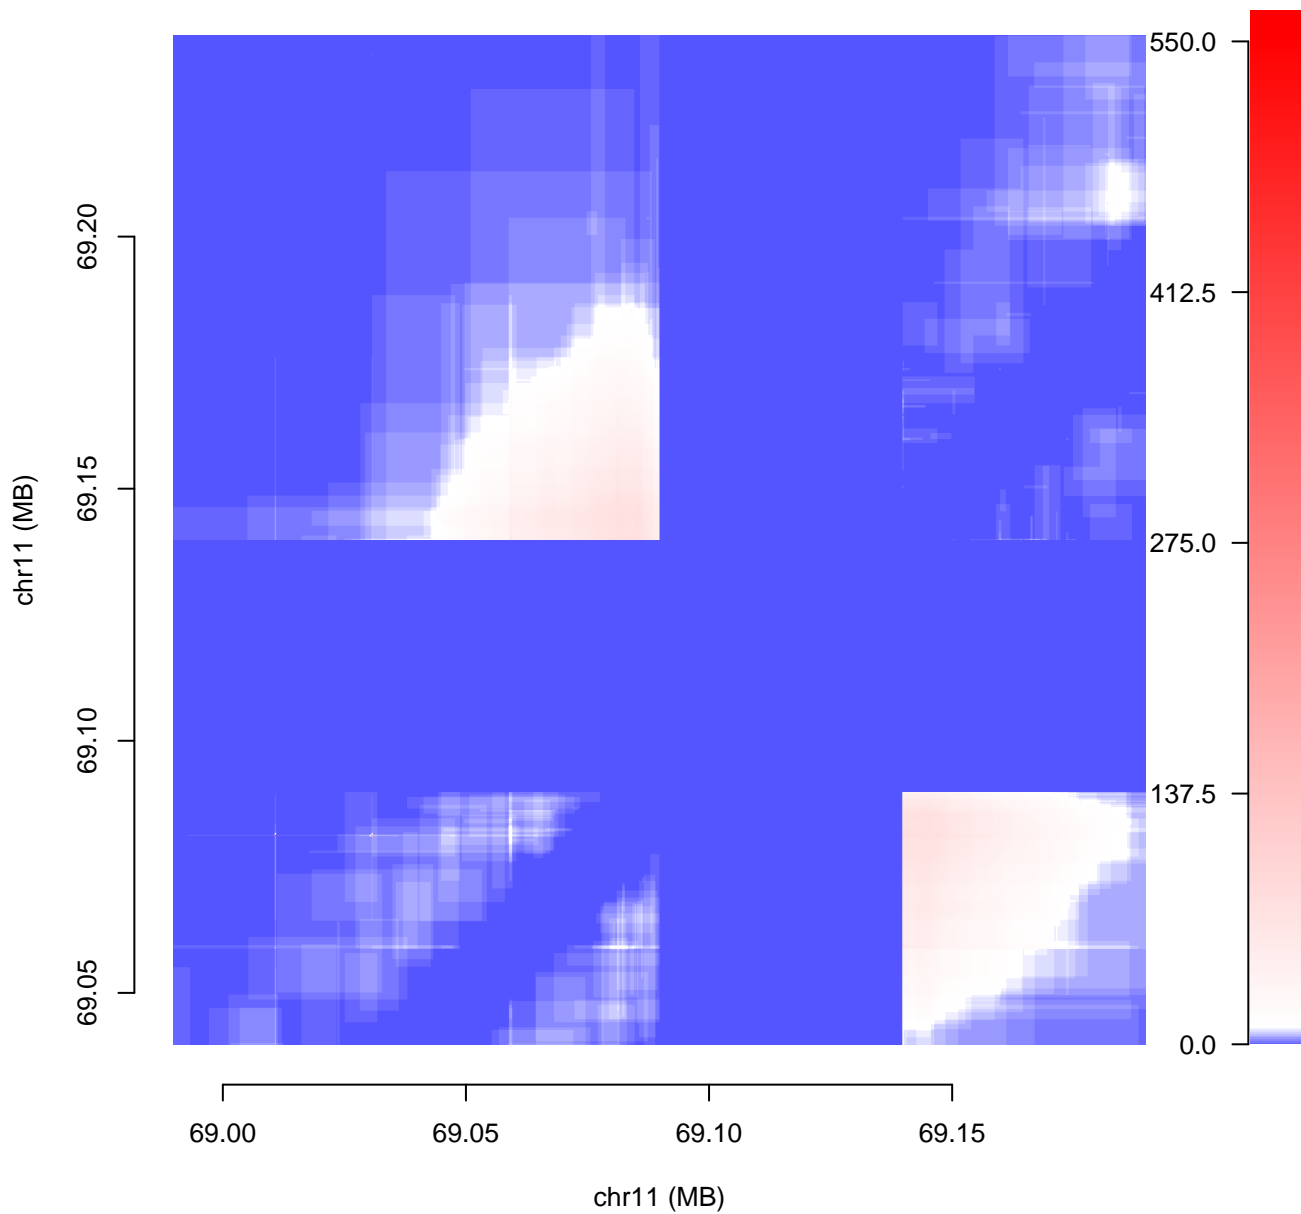

Supplement: Supplemental_Data.zip [file event_430.pdf › event_430.pdf]

Barcode

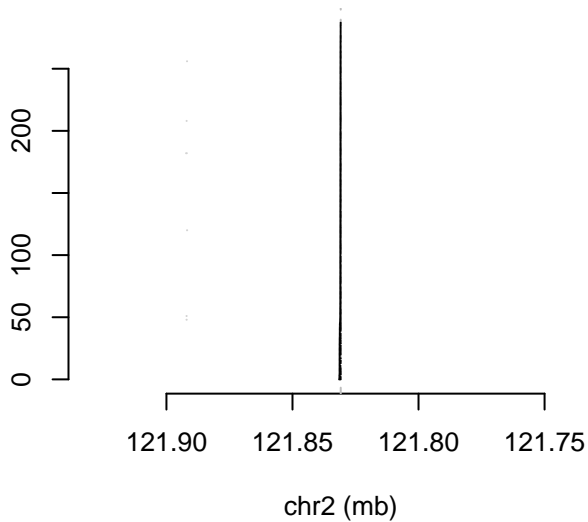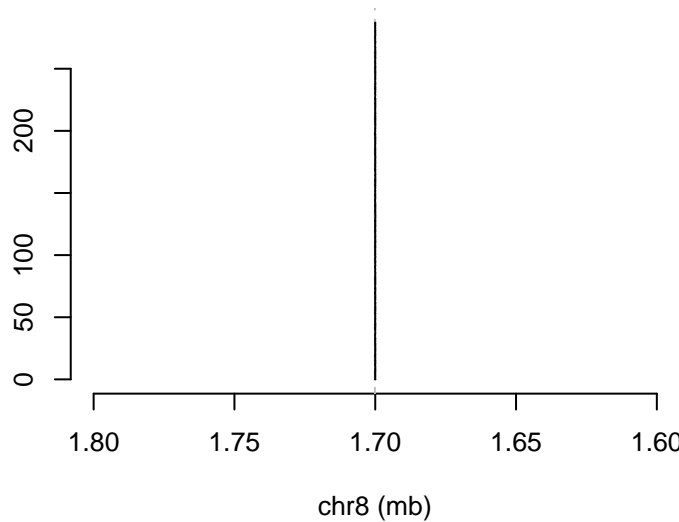

Copy number

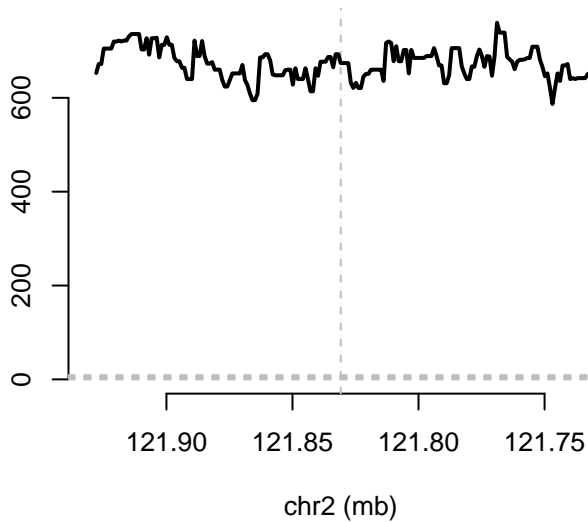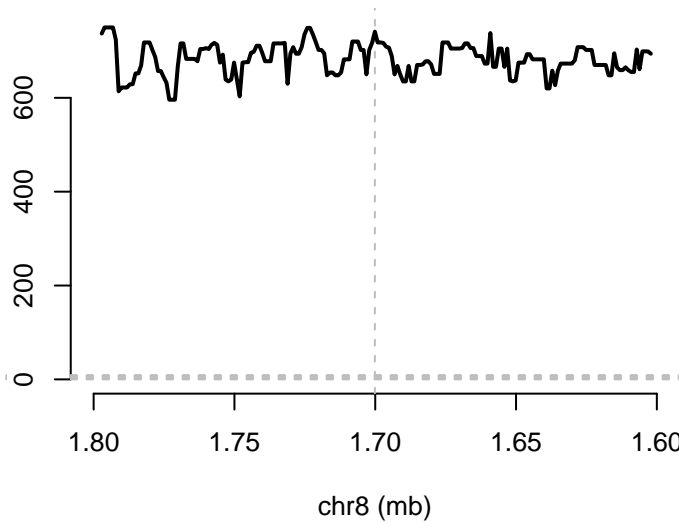

K562 chr2:121,830,857::chr8:1,700,133-+

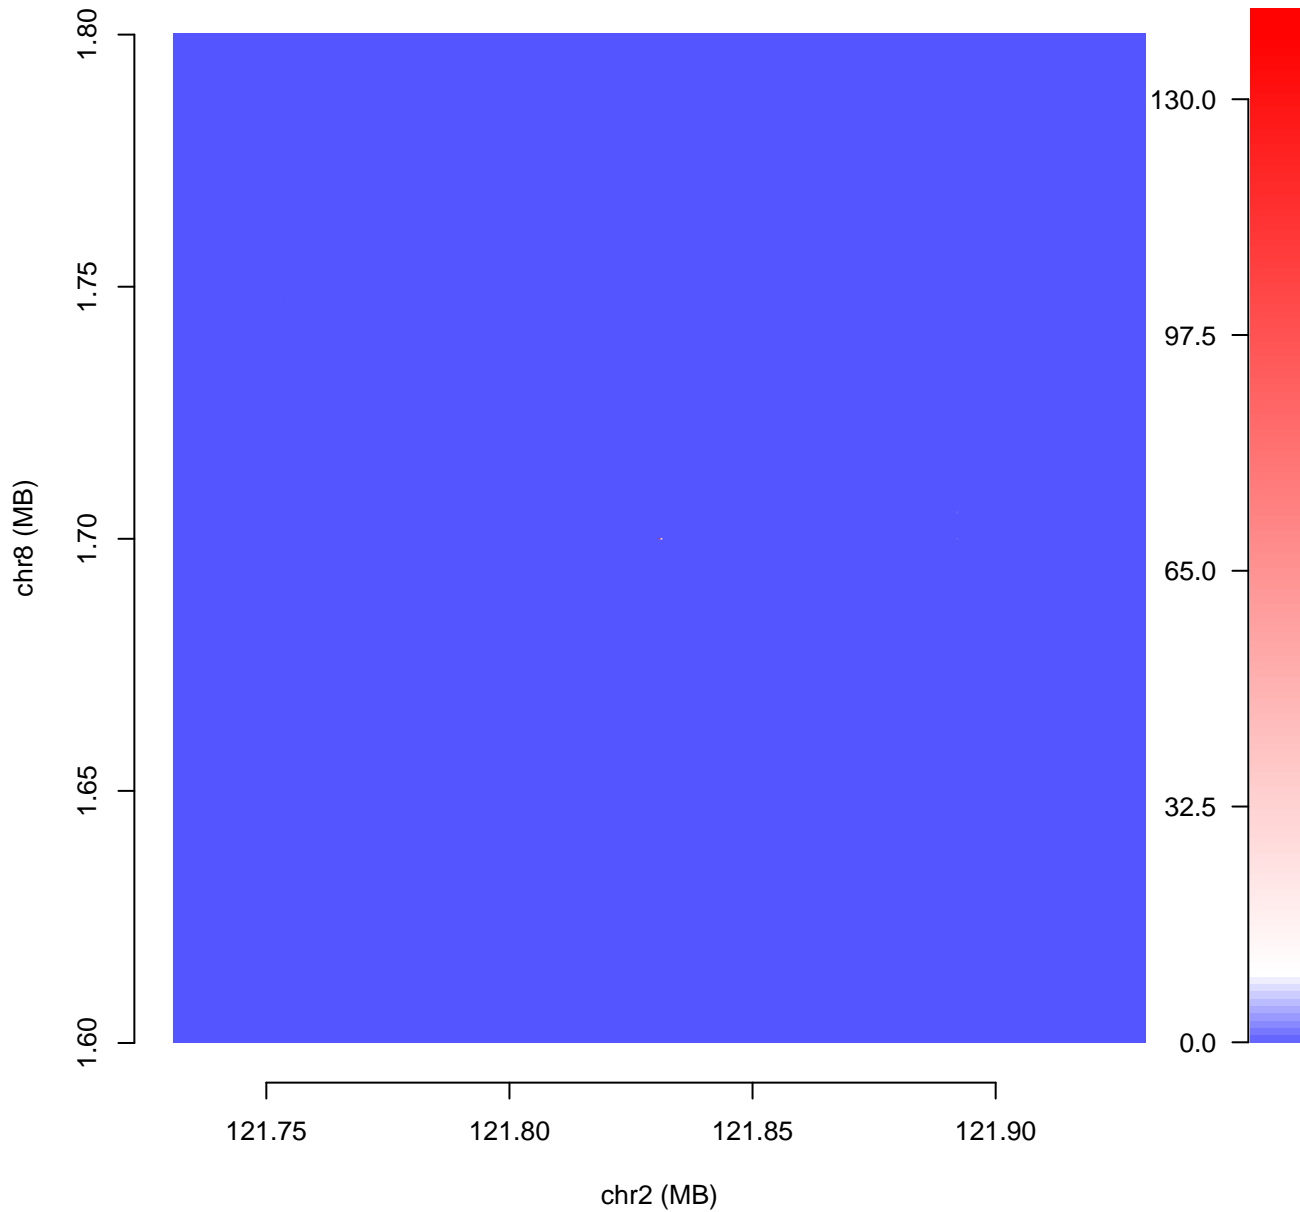

Supplement: Supplemental_Data.zip [file event_431.pdf › event_431.pdf]

Barcode

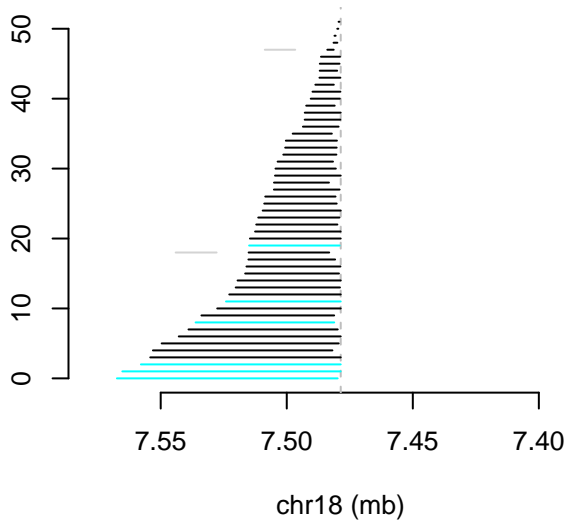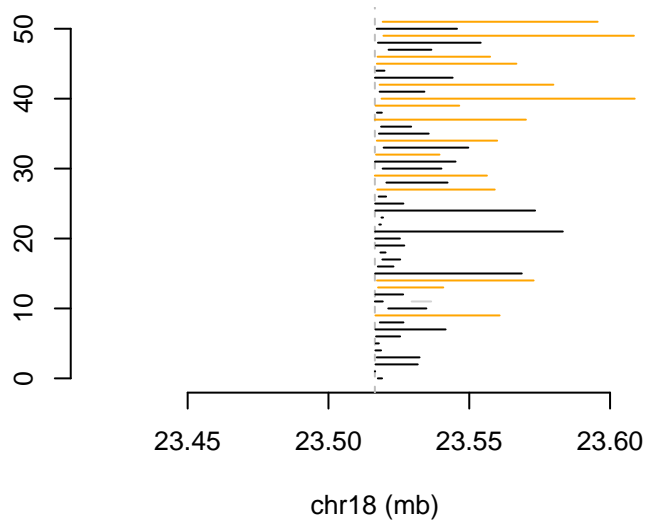

Copy number

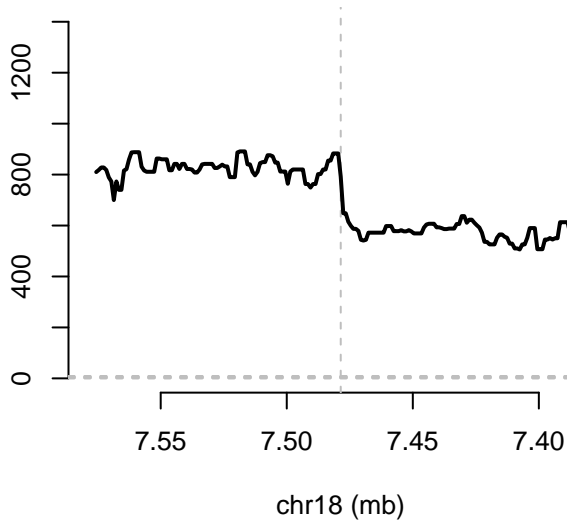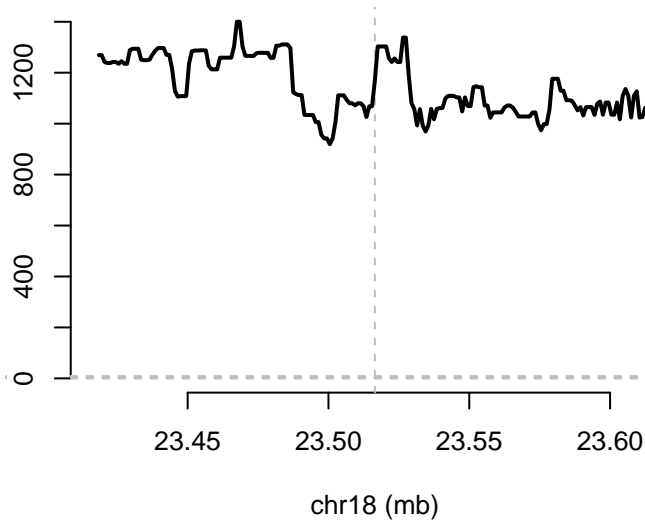

K562 chr18:7,478,587::chr18:23,516,481--

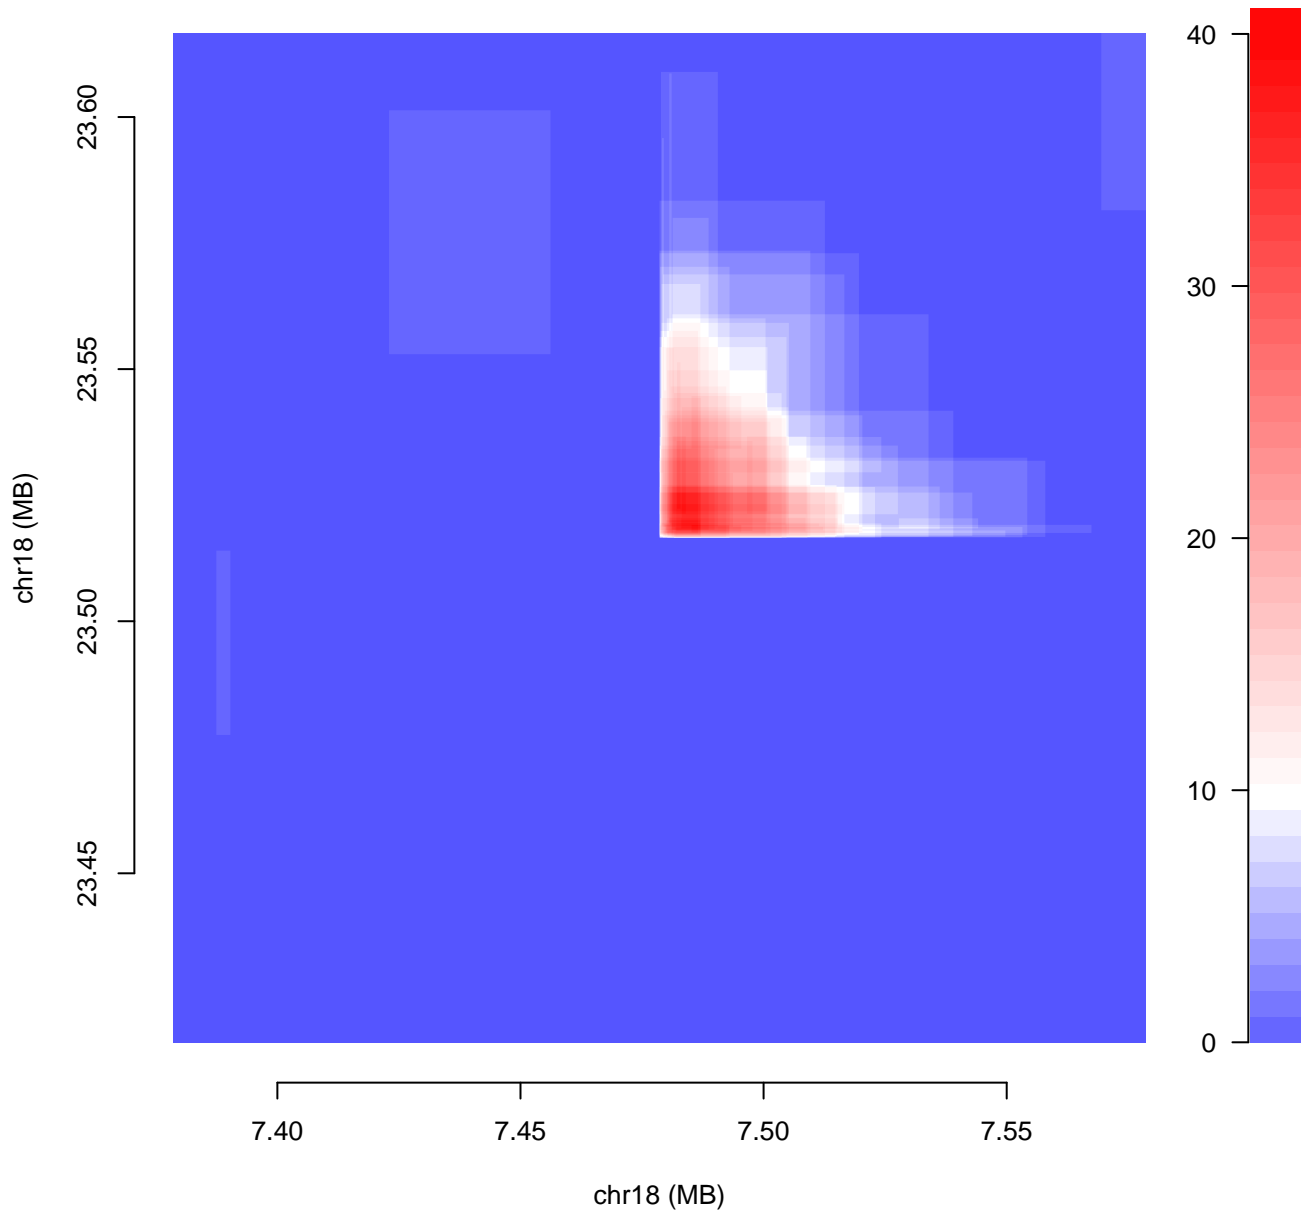

Supplement: Supplemental_Data.zip [file event_432.pdf › event_432.pdf]

Barcode

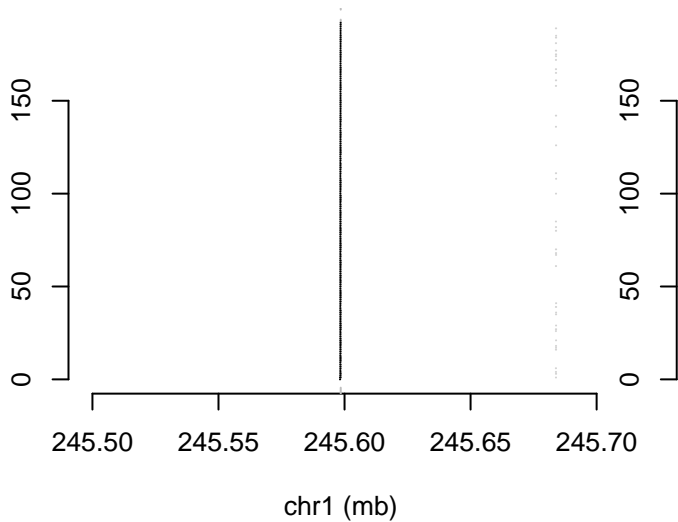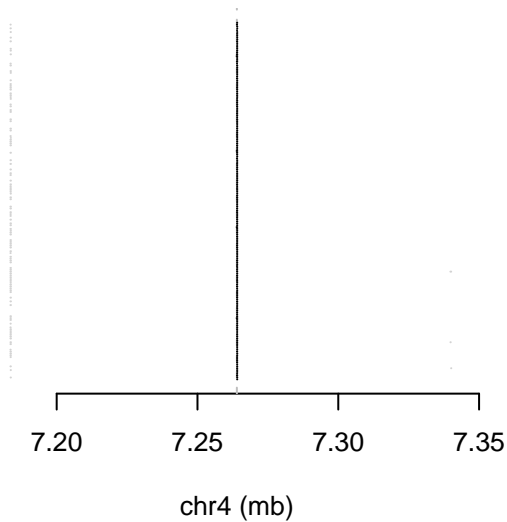

Copy number

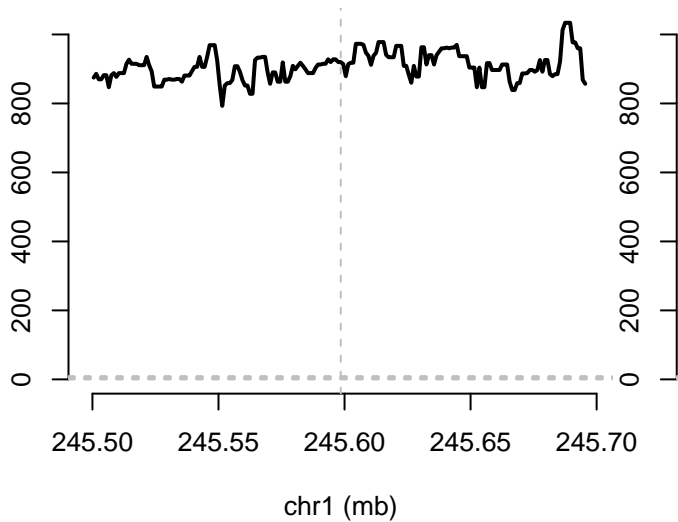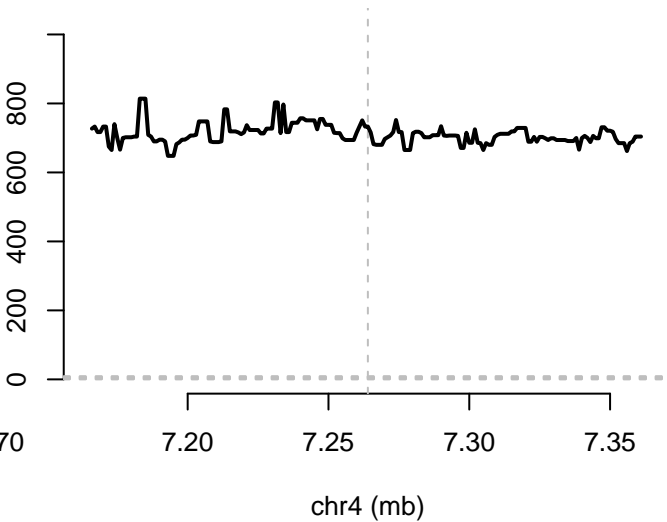

K562 chr1:245,598,495::chr4:7,263,987+-

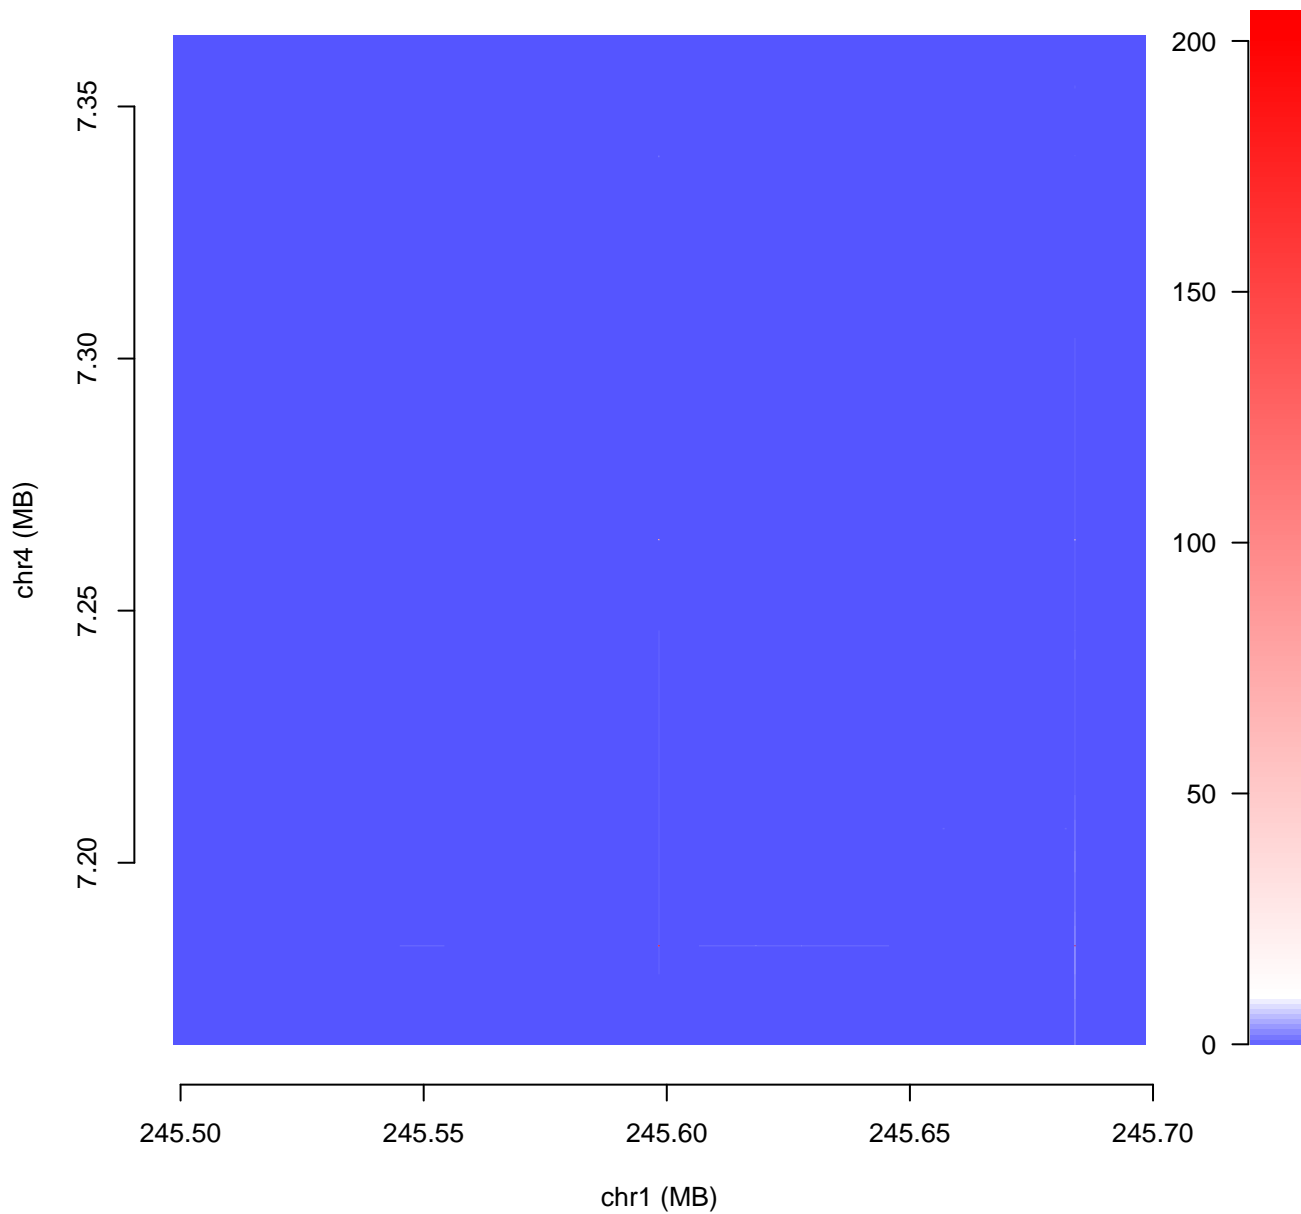

Supplement: Supplemental_Data.zip [file event_433.pdf › event_433.pdf]

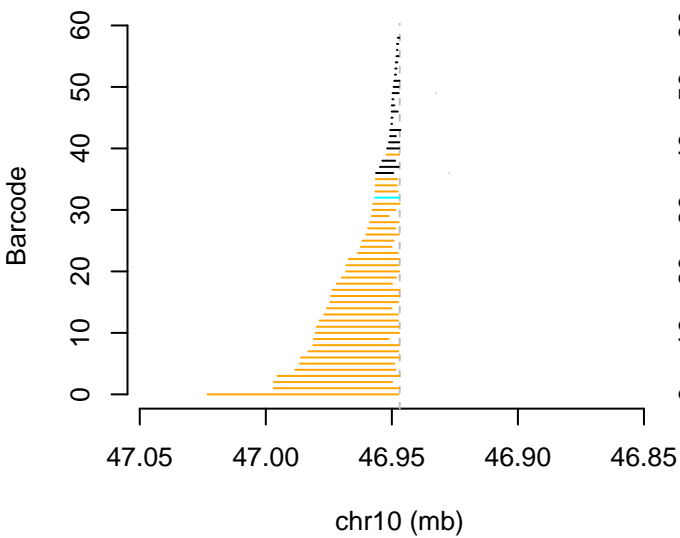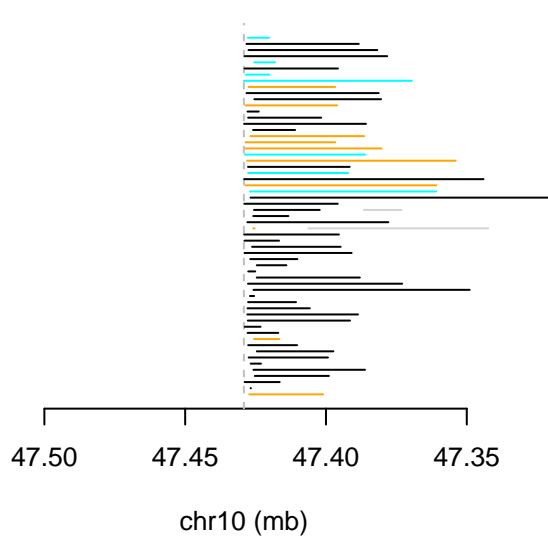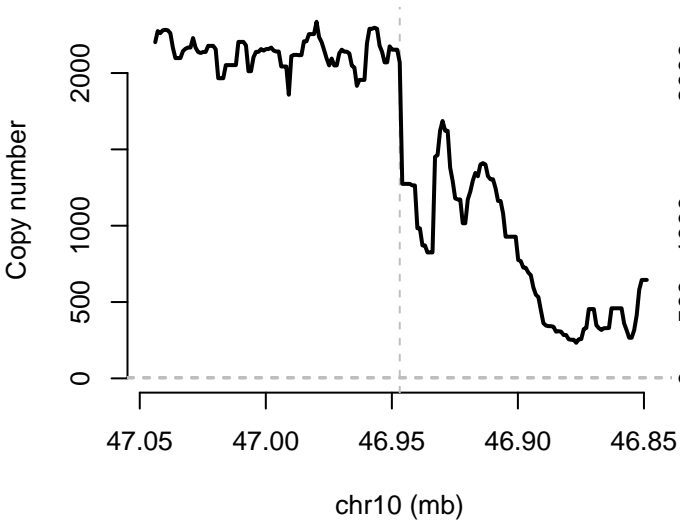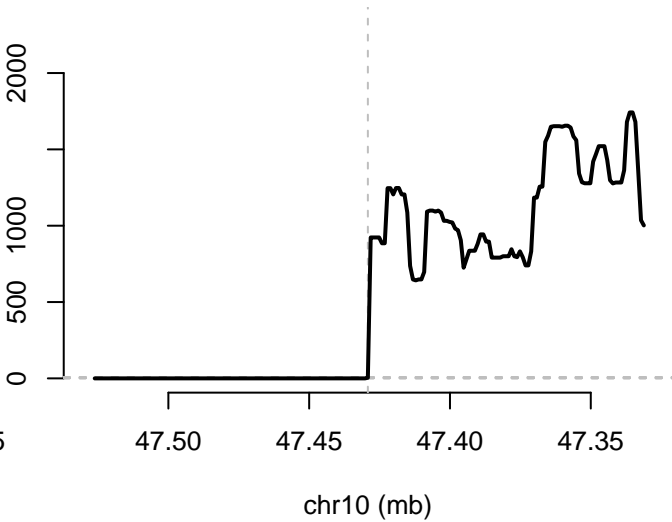

K562 chr10:46,946,871::chr10:47,429,157-+

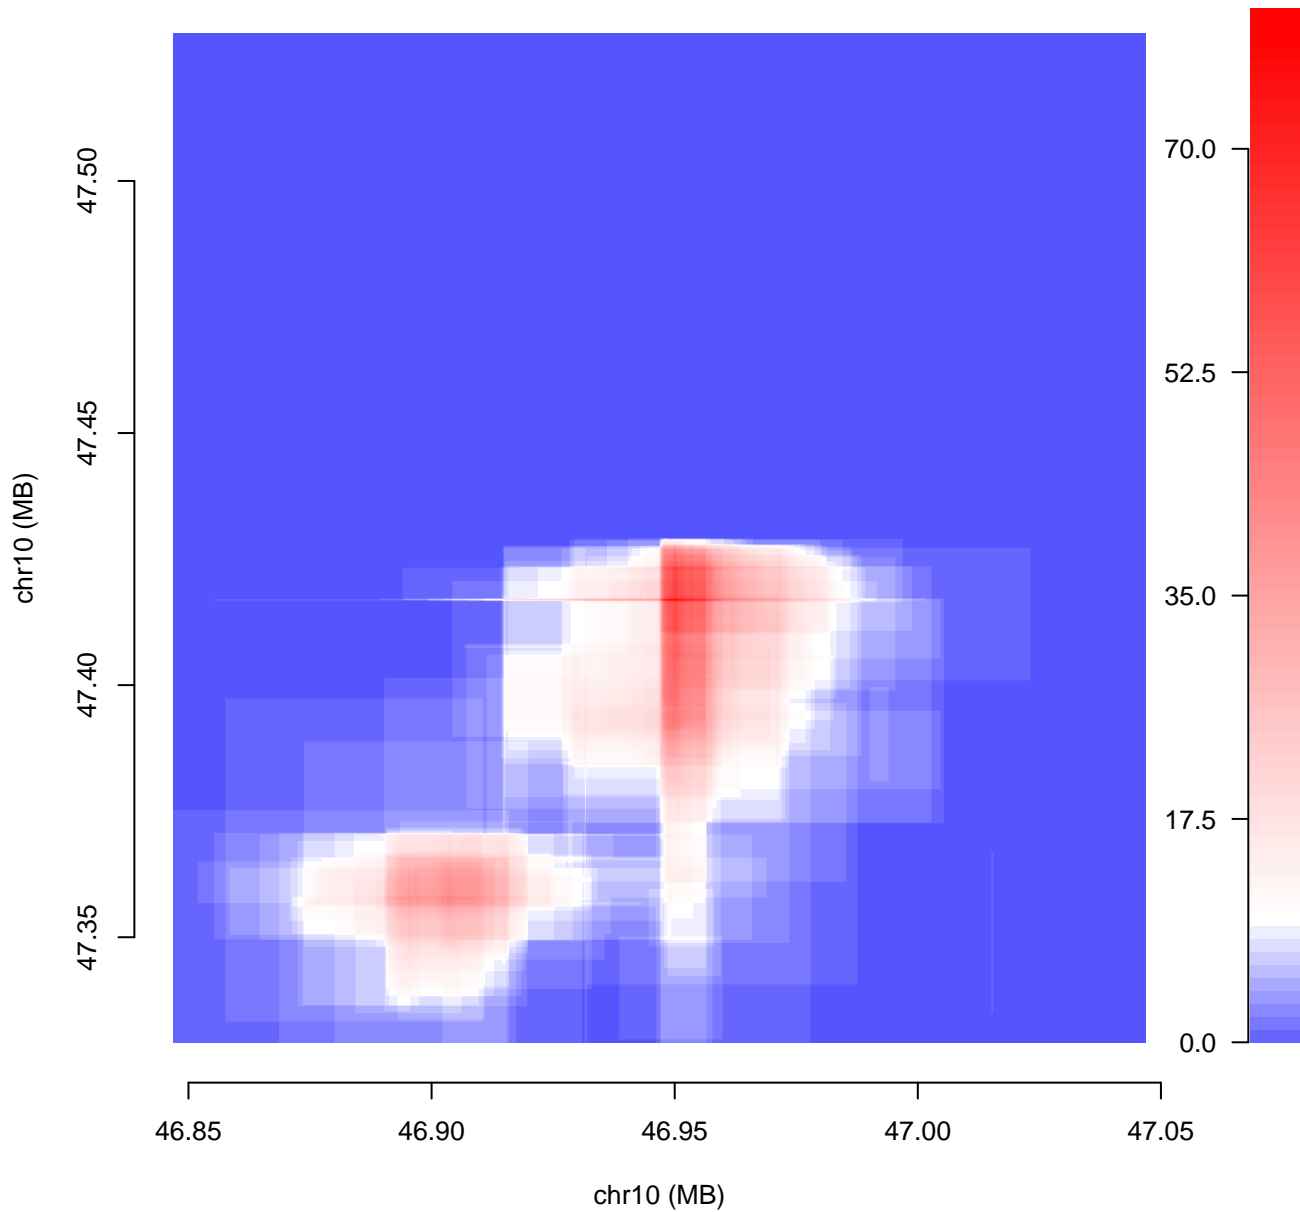

Supplement: Supplemental_Data.zip [file event_434.pdf › event_434.pdf]

Barcode

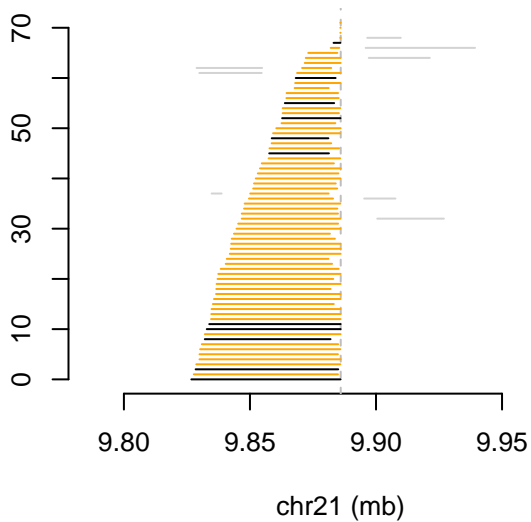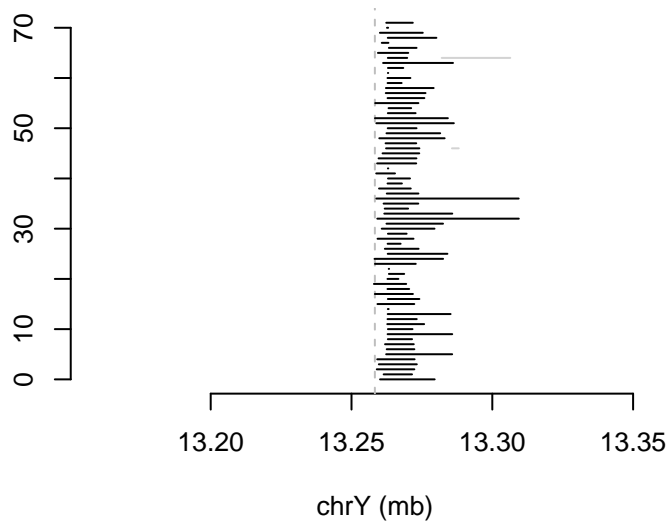

Copy number

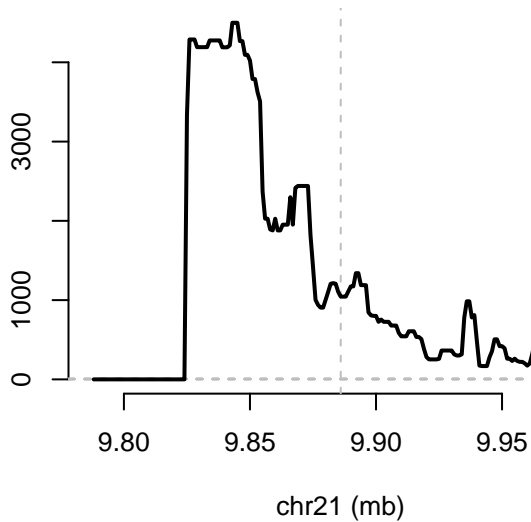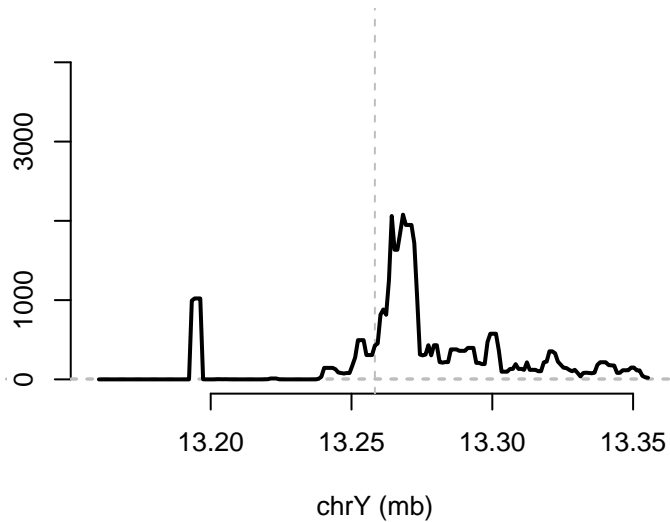

K562 chr21:9,886,013::chrY:13,258,298+-

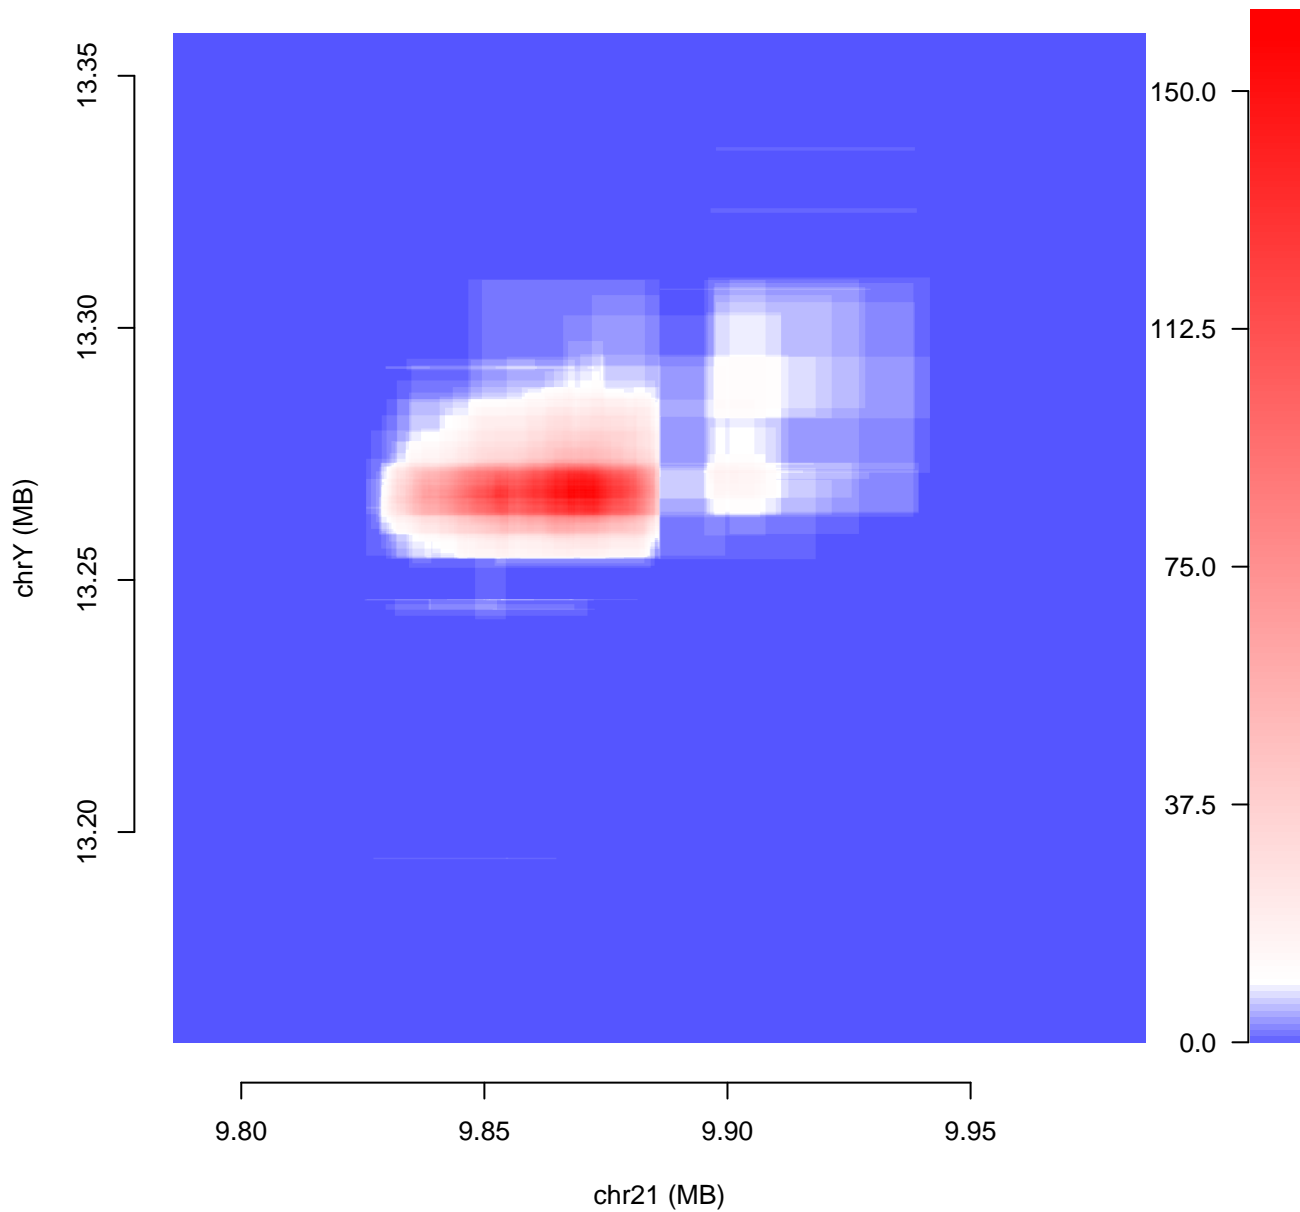

Supplement: Supplemental_Data.zip [file event_435.pdf › event_435.pdf]

Barcode

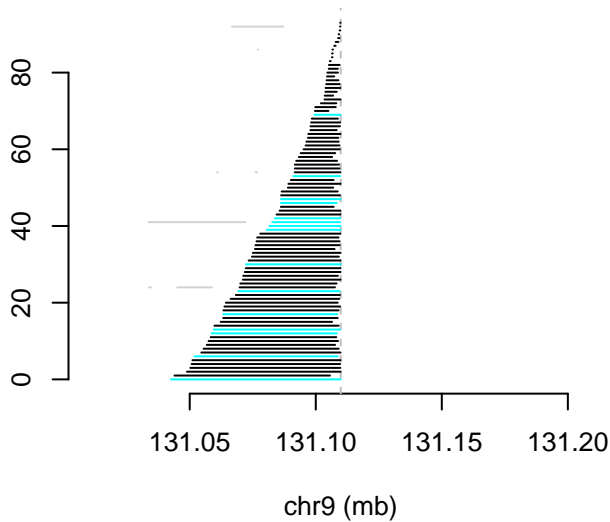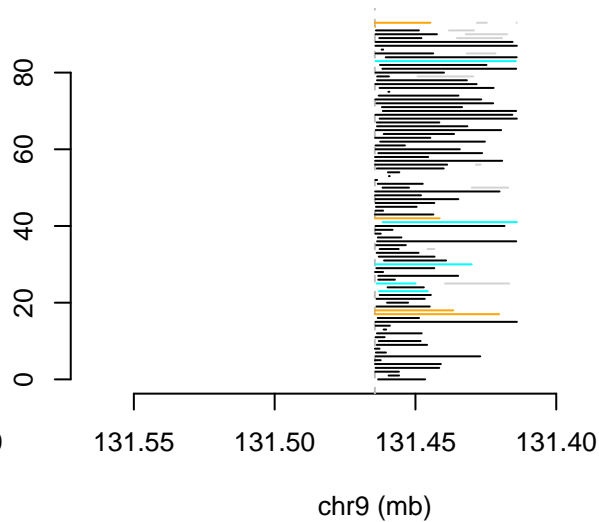

Copy number

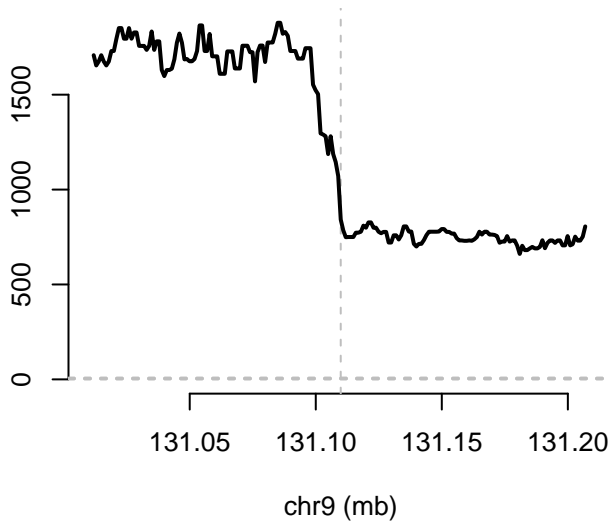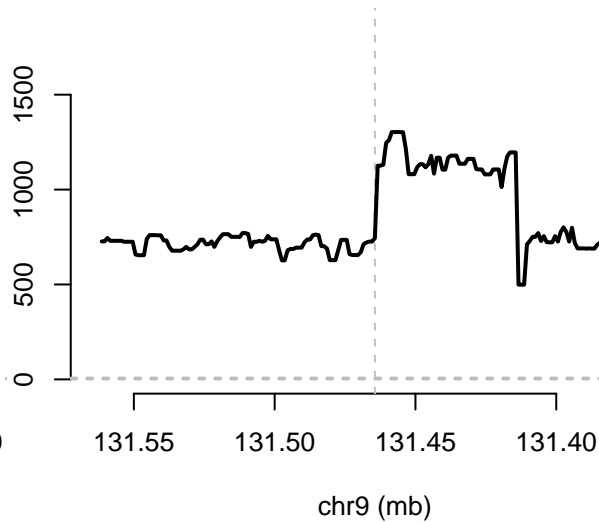

K562 chr9:131,109,910::chr9:131,464,412++

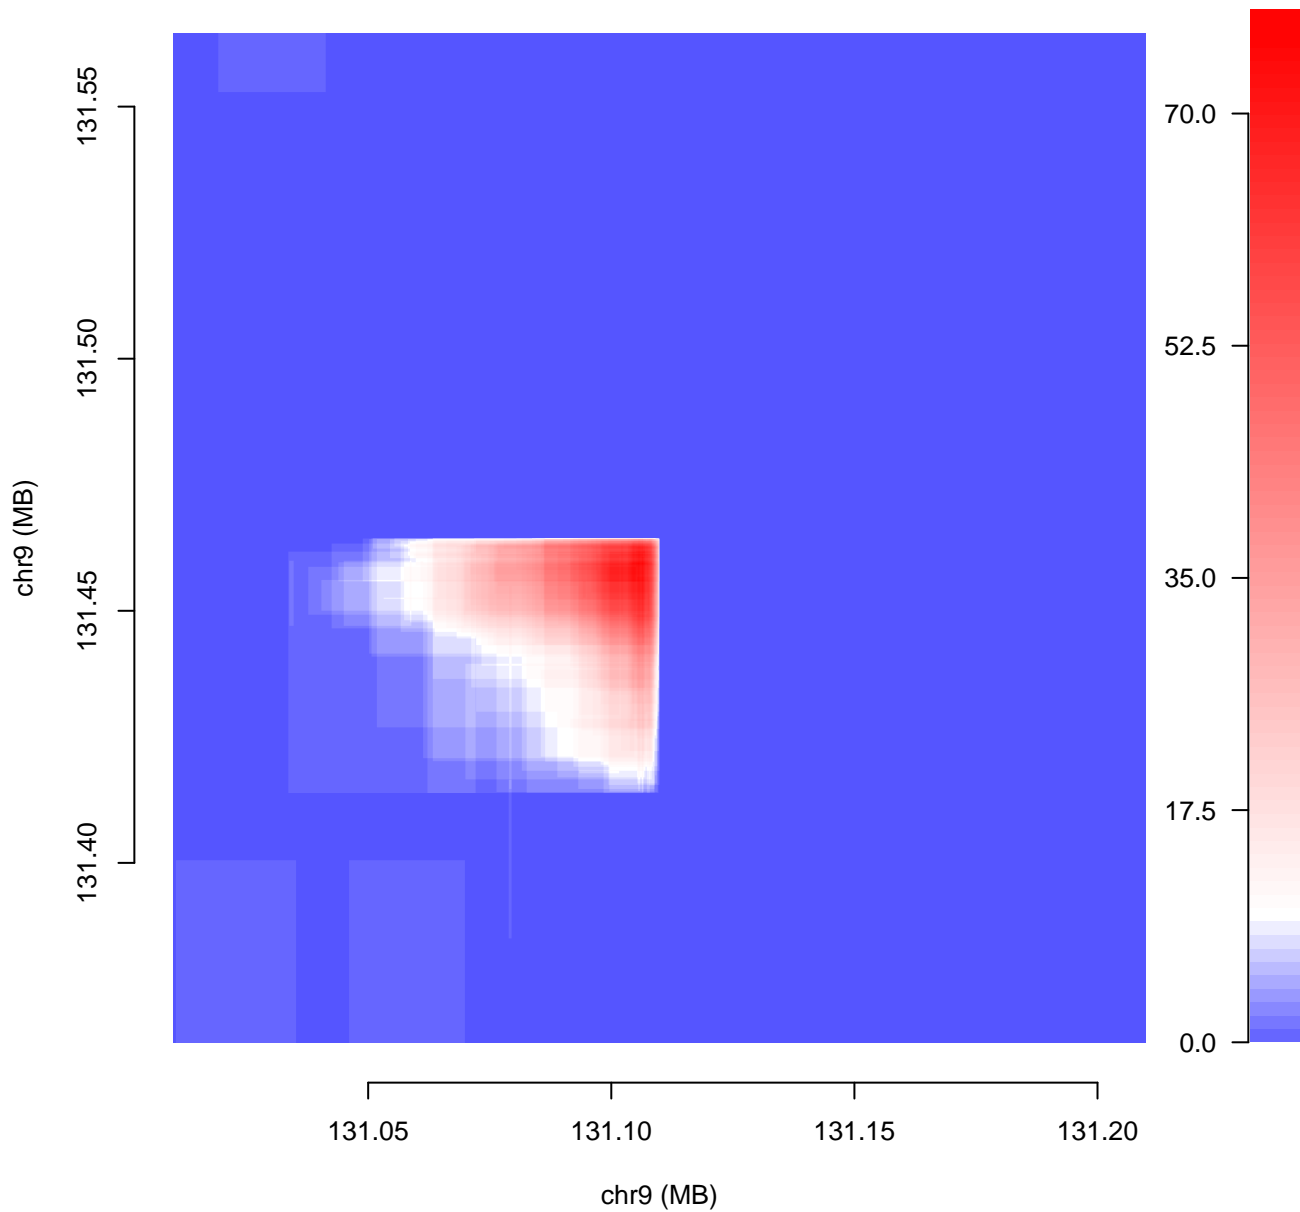

Supplement: Supplemental_Data.zip [file event_436.pdf › event_436.pdf]

Barcode

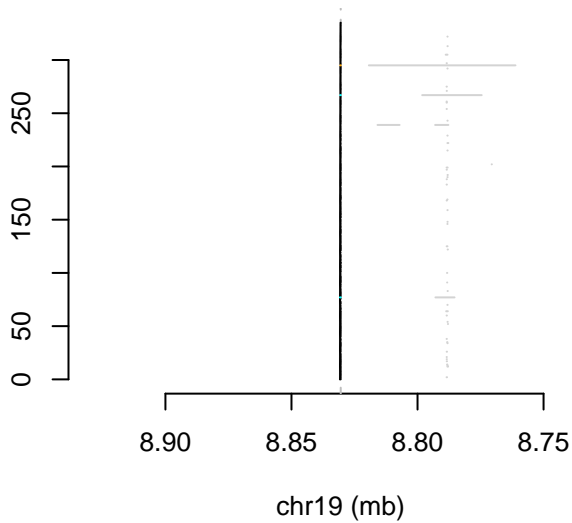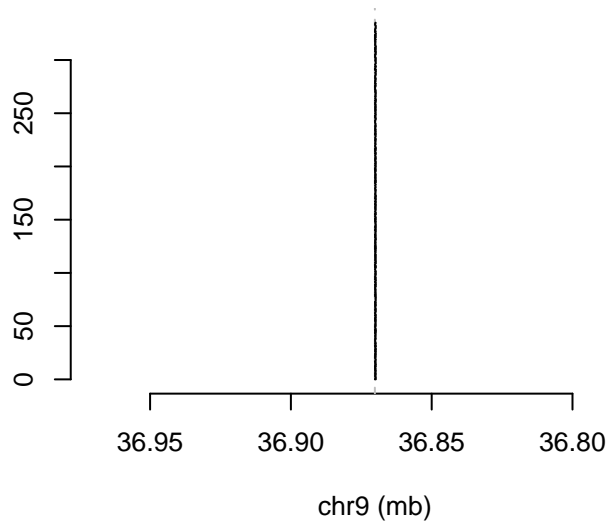

Copy number

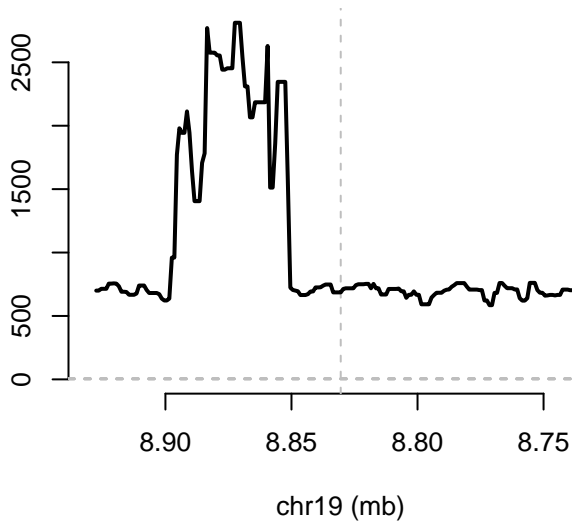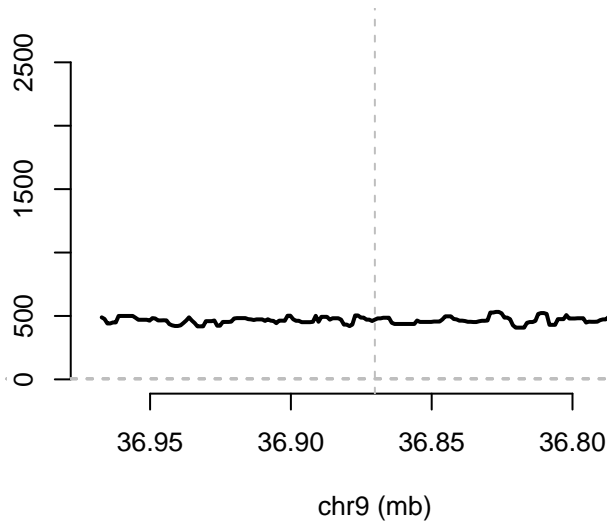

K562 chr9:36,870,179::chr19:8,830,459+-

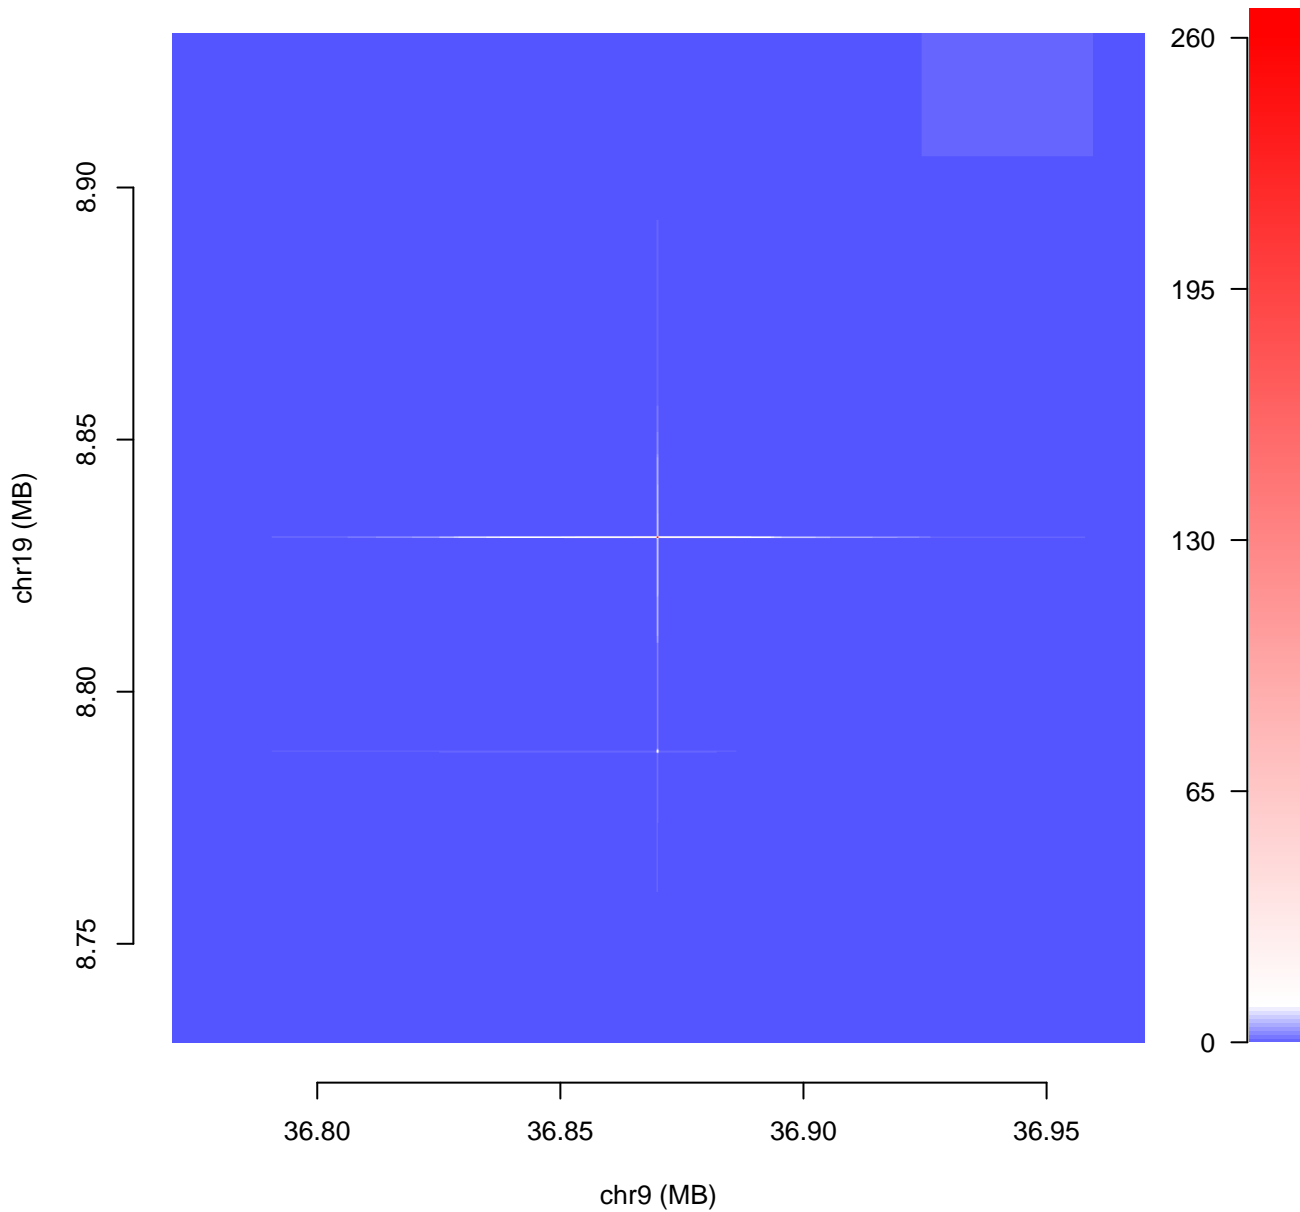

Supplement: Supplemental_Data.zip [file event_437.pdf › event_437.pdf]

Barcode

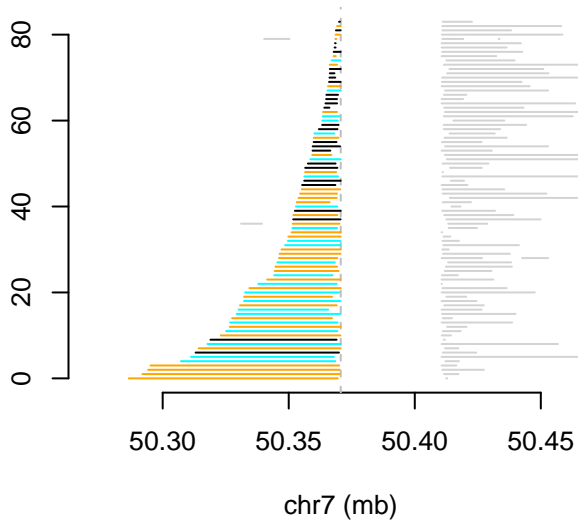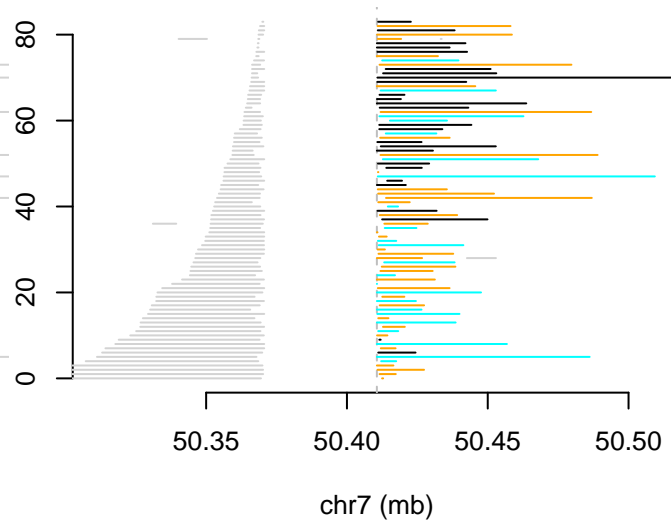

Copy number

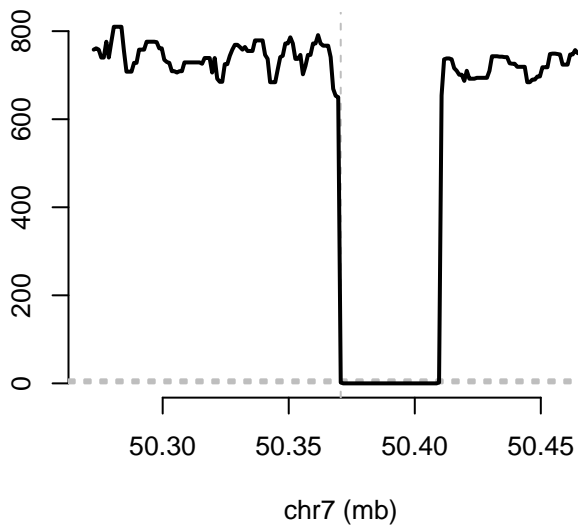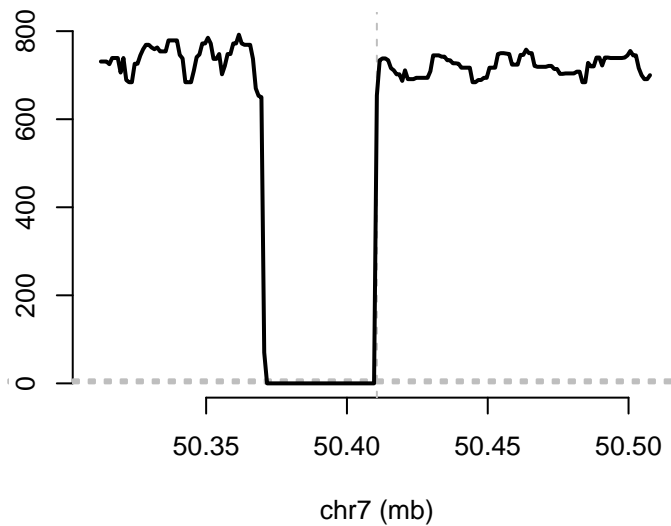

K562 chr7:50,410,630::chr7:50,370,631-+

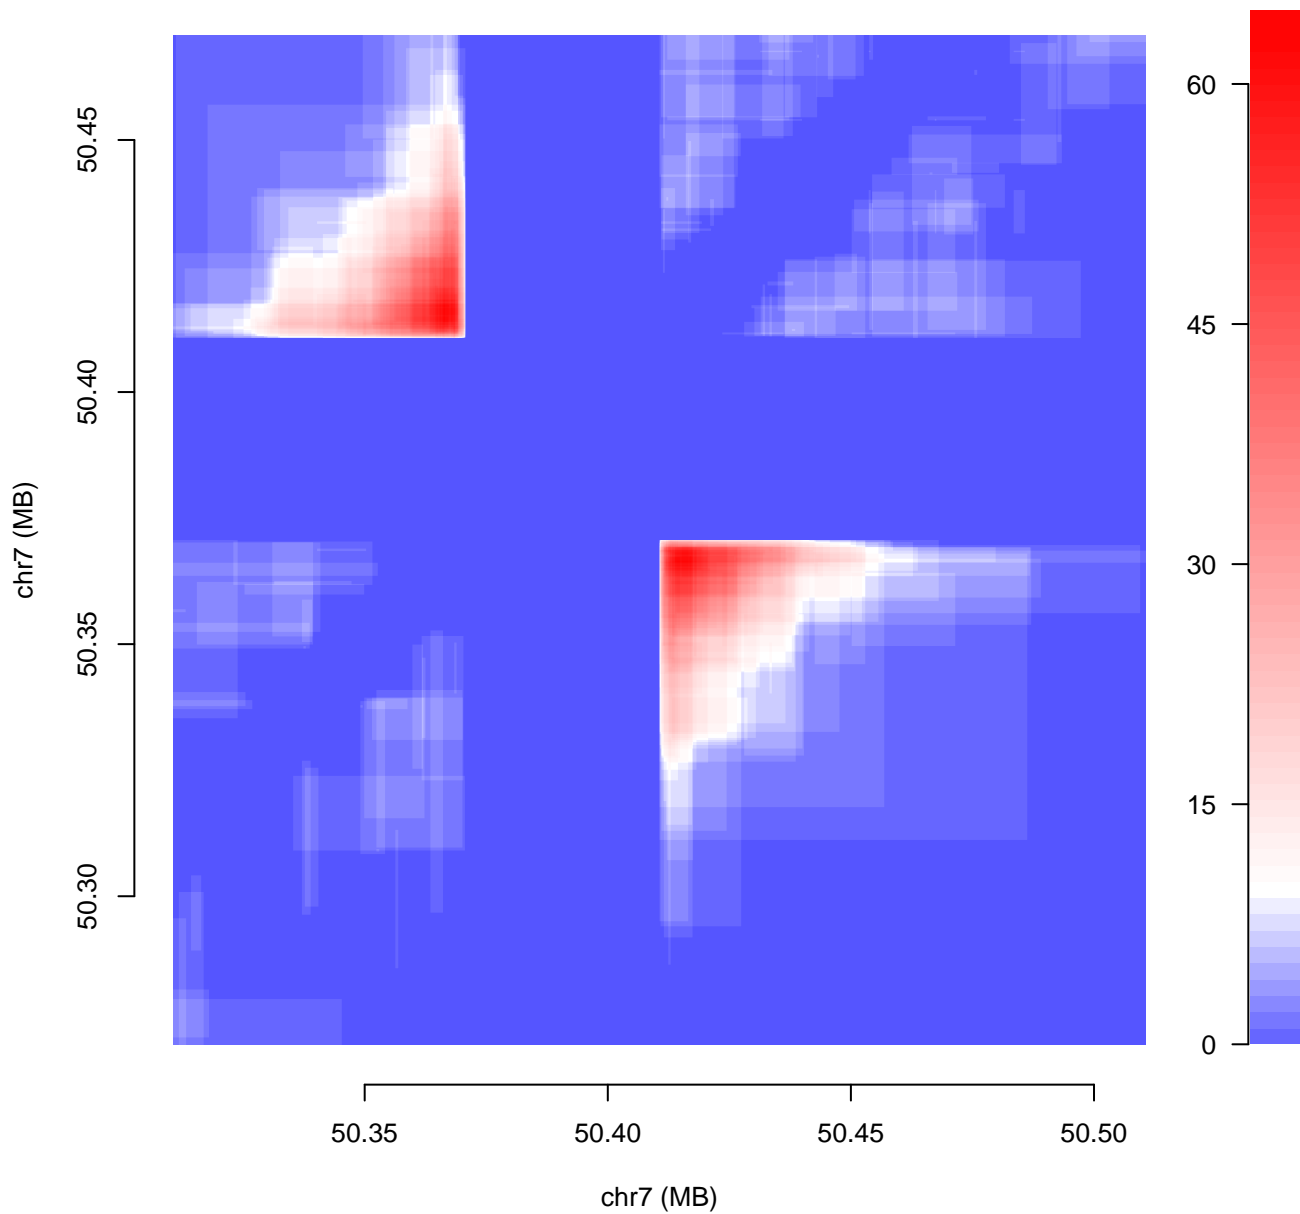

Supplement: Supplemental_Data.zip [file event_438.pdf › event_438.pdf]

Barcode

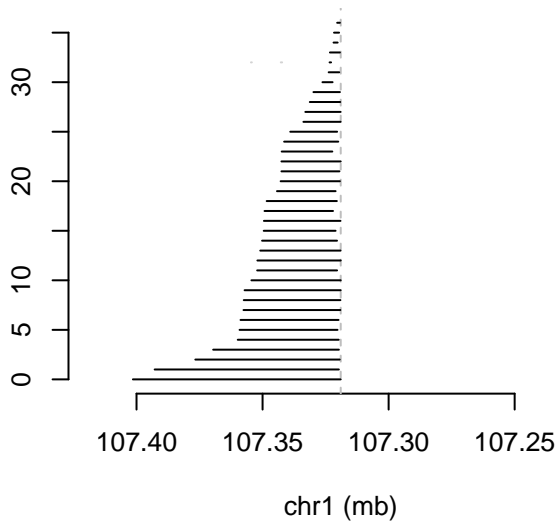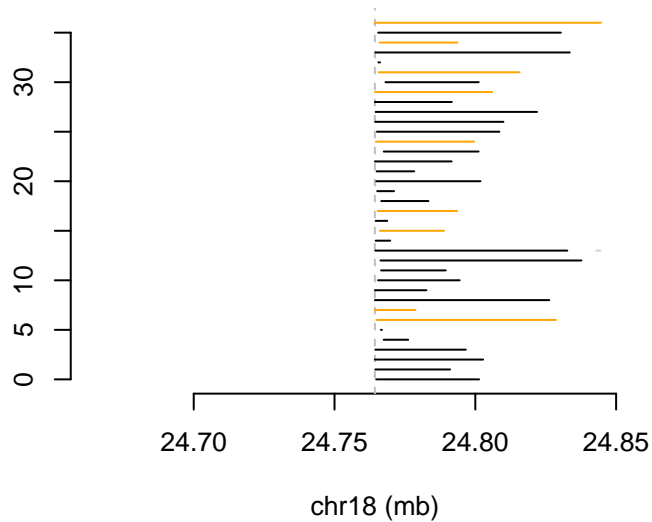

Copy number

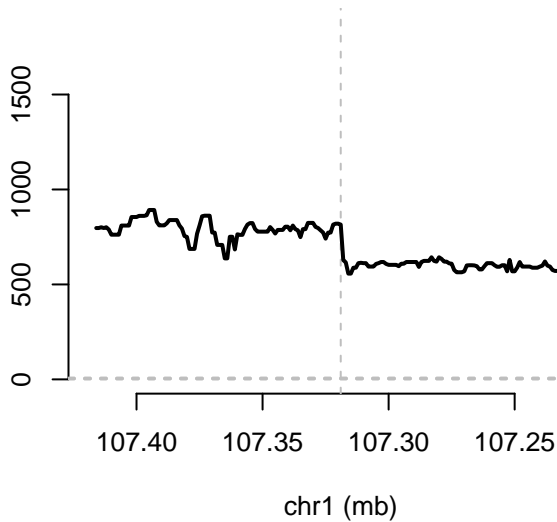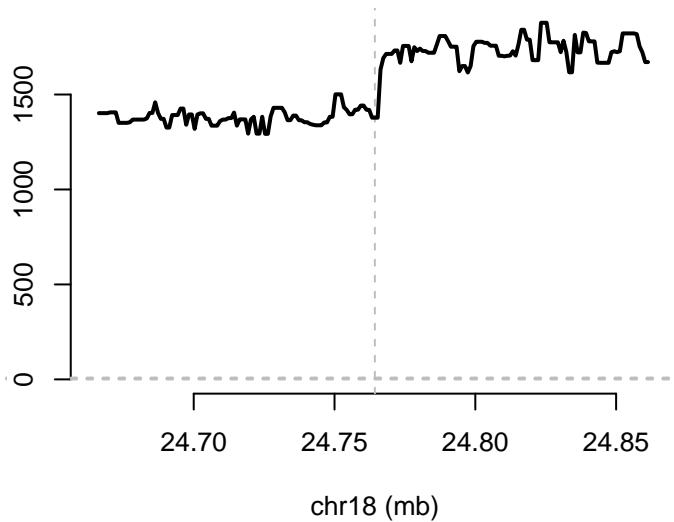

K562 chr18:24,764,326::chr1:107,318,991--

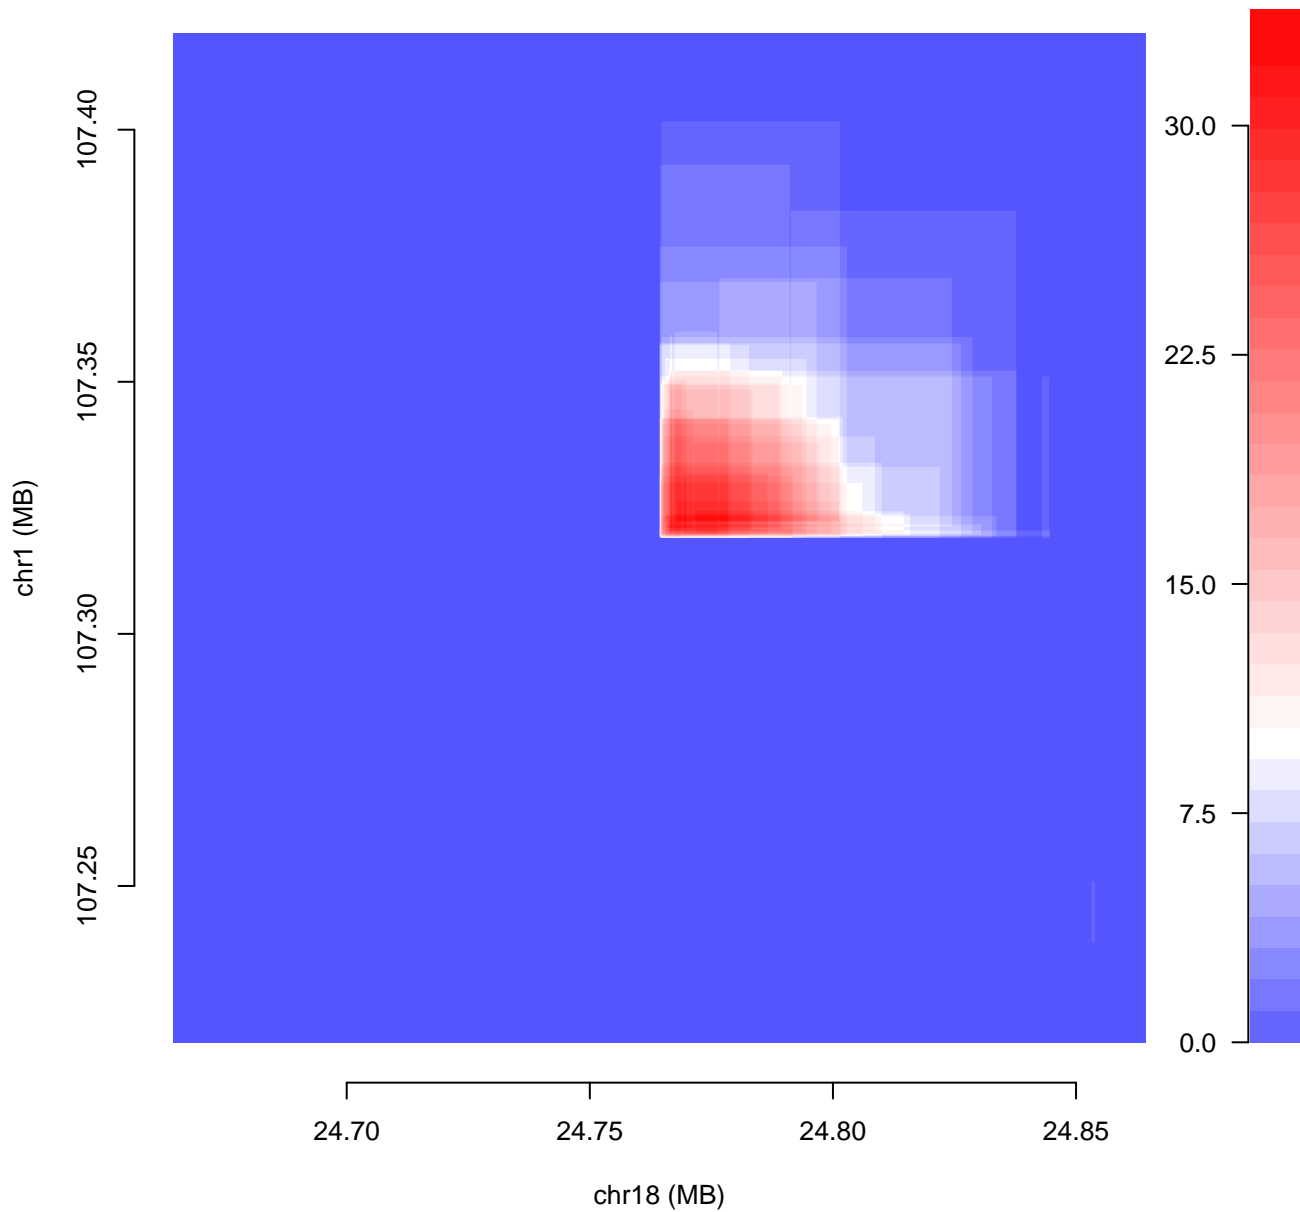

Supplement: Supplemental_Data.zip [file event_439.pdf › event_439.pdf]

Barcode

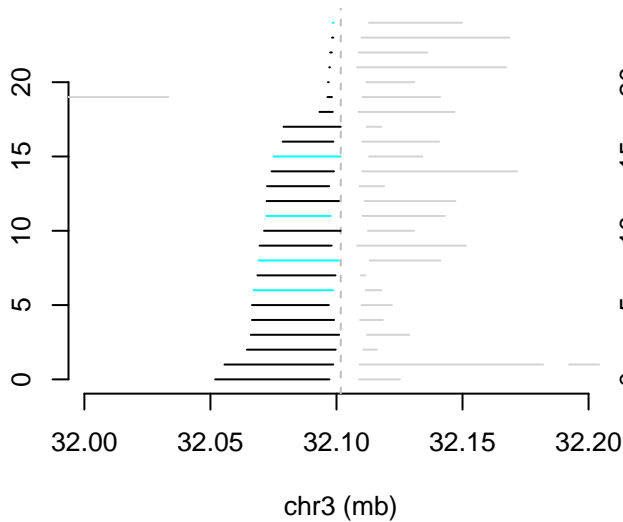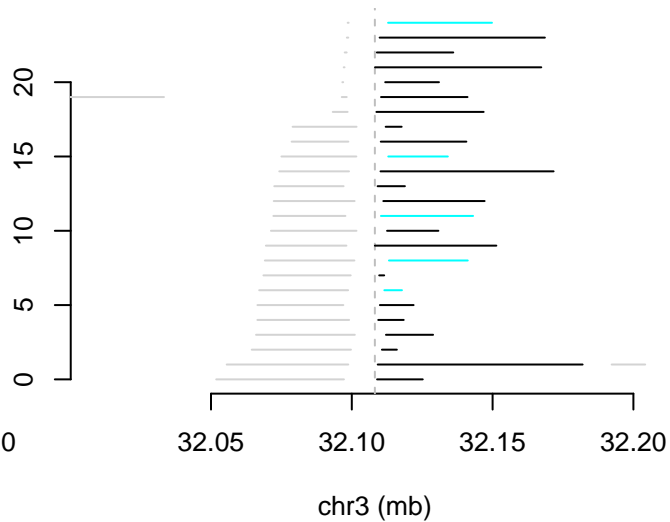

Copy number

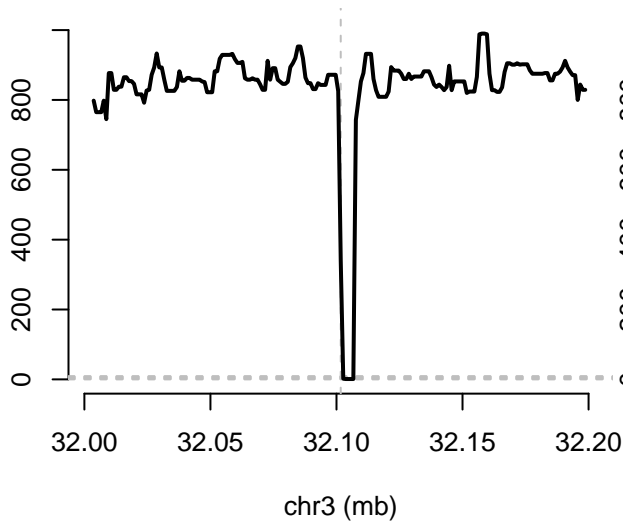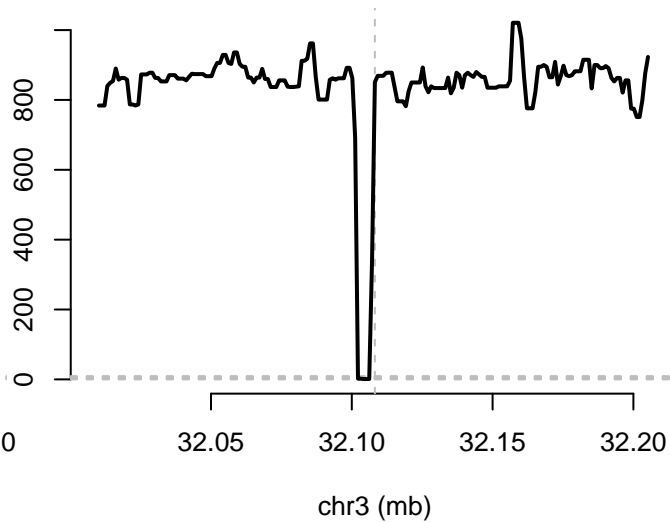

K562 chr3:32,101,690::chr3:32,108,189+-

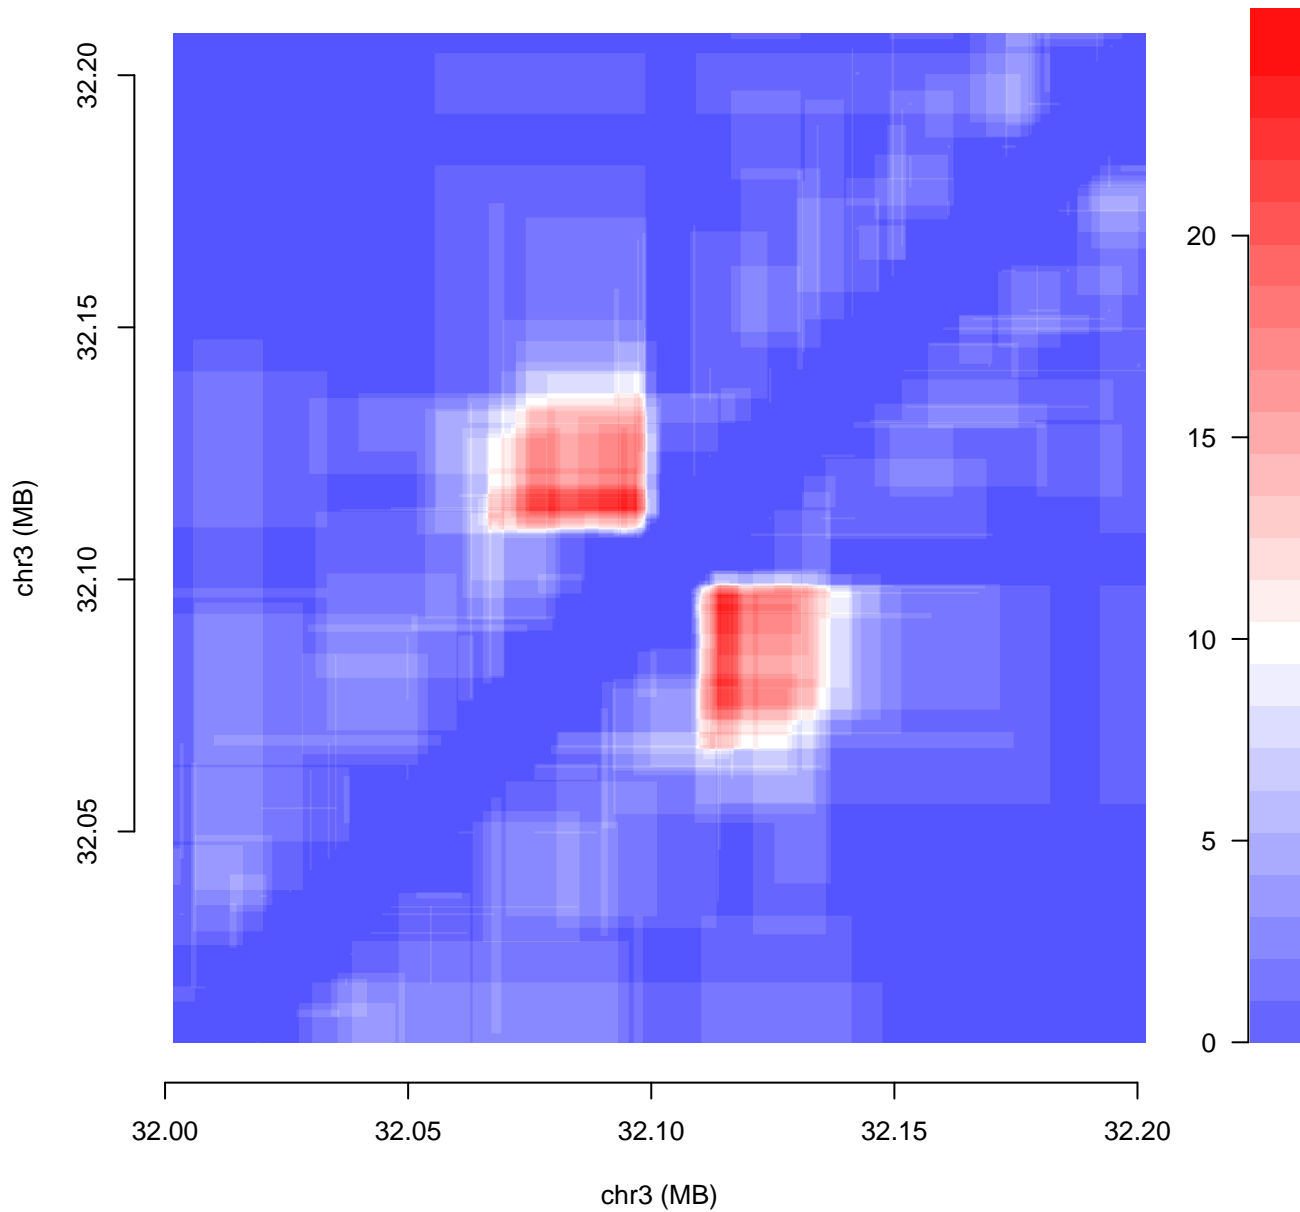

Supplement: Supplemental_Data.zip [file event_44.pdf › event_44.pdf]

Barcode

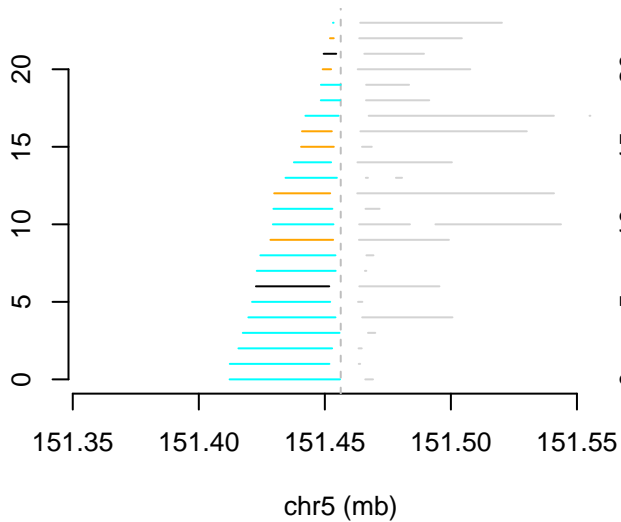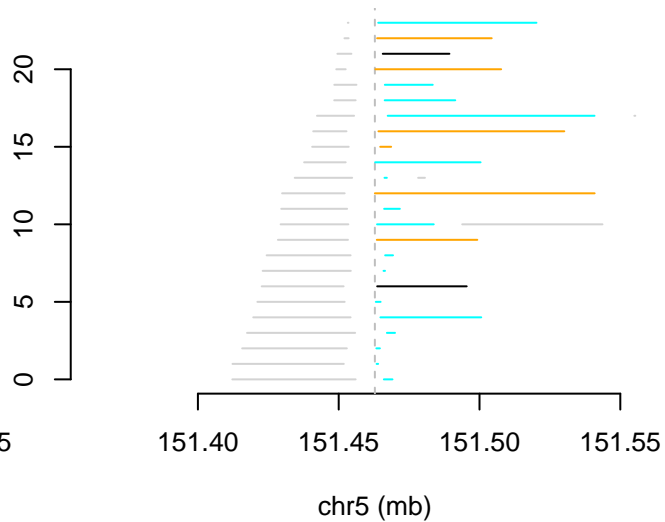

Copy number

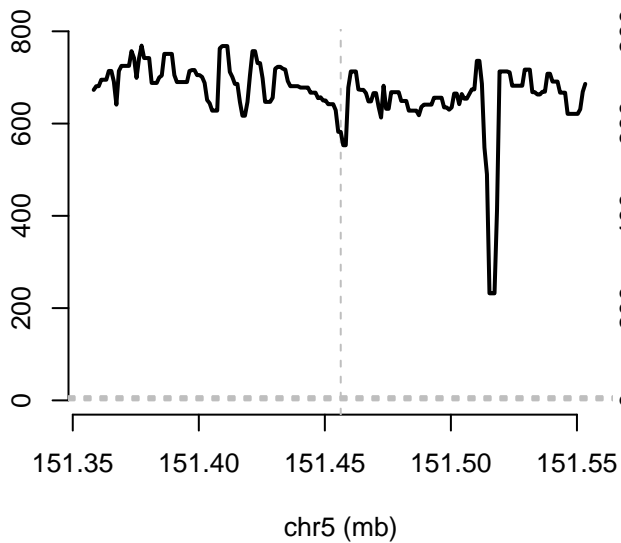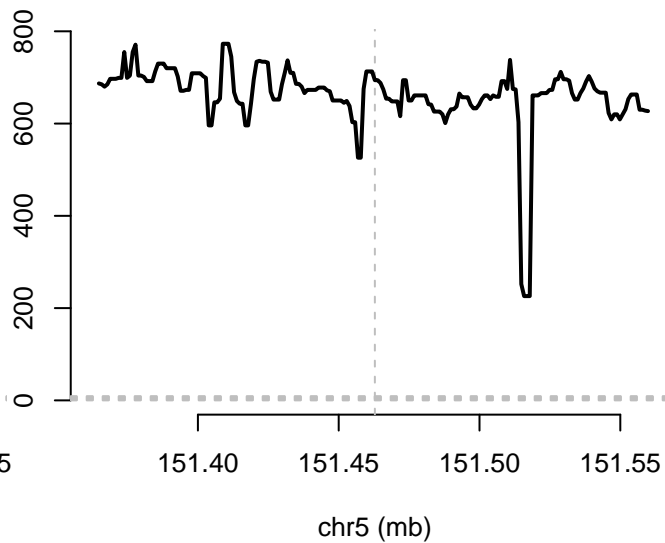

K562 chr5:151,462,845::chr5:151,456,305-+

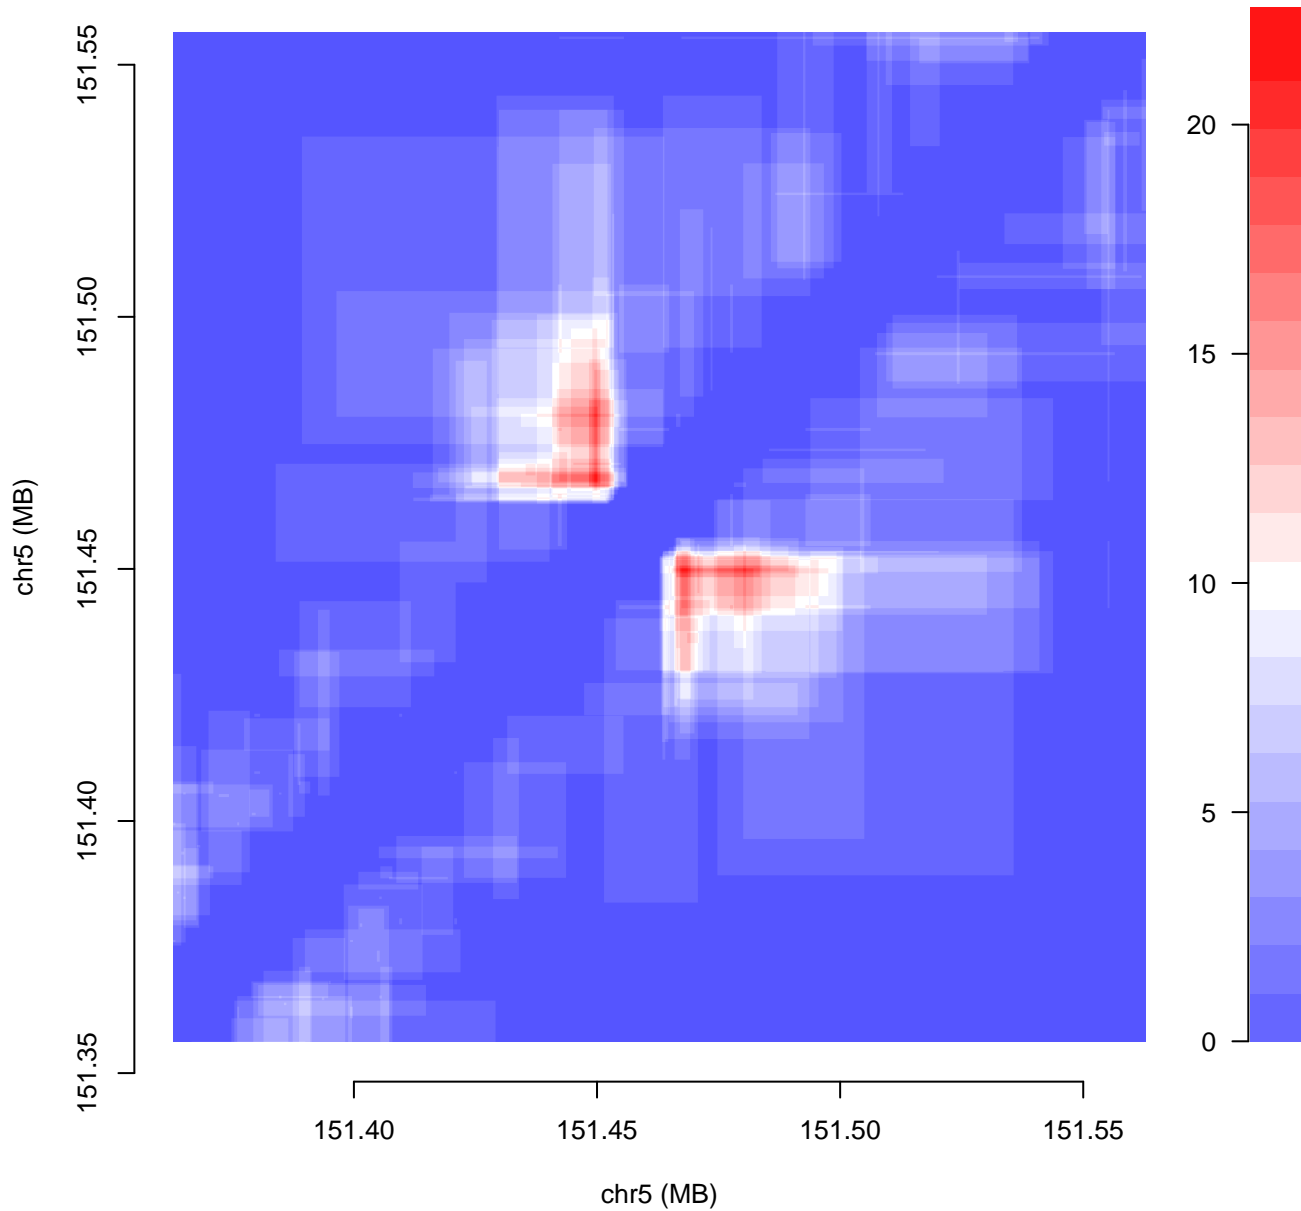

Supplement: Supplemental_Data.zip [file event_440.pdf › event_440.pdf]

Barcode

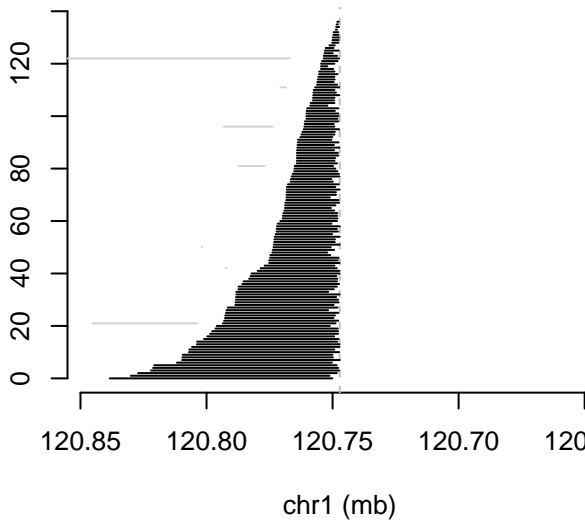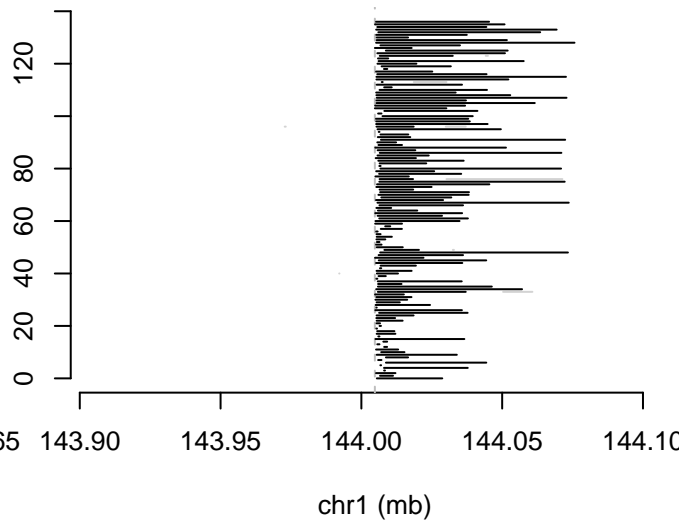

Copy number

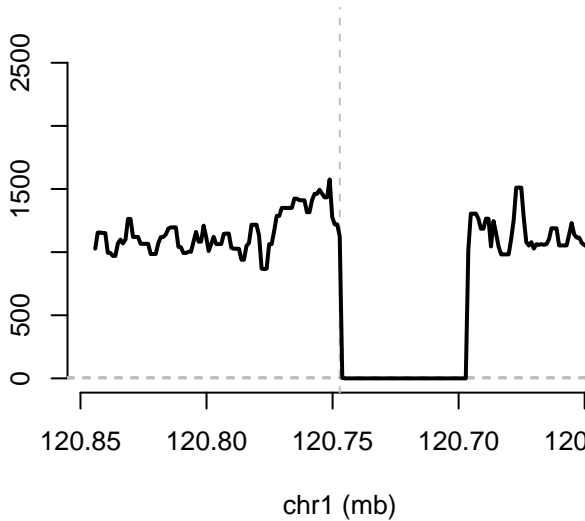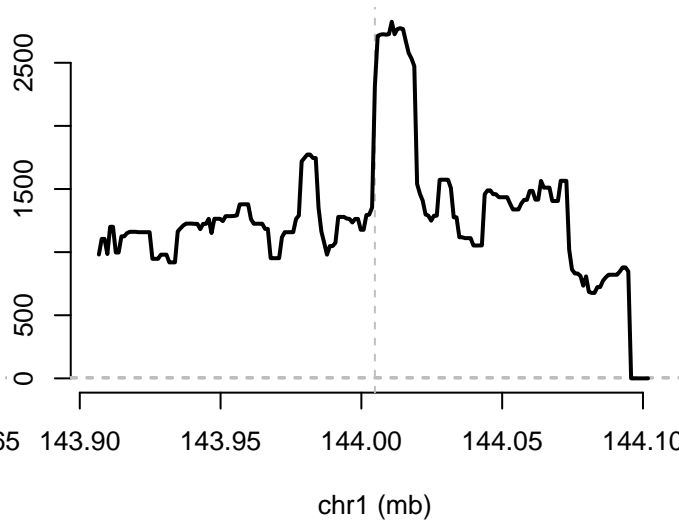

K562 chr1:120,747,158::chr1:144,004,790--

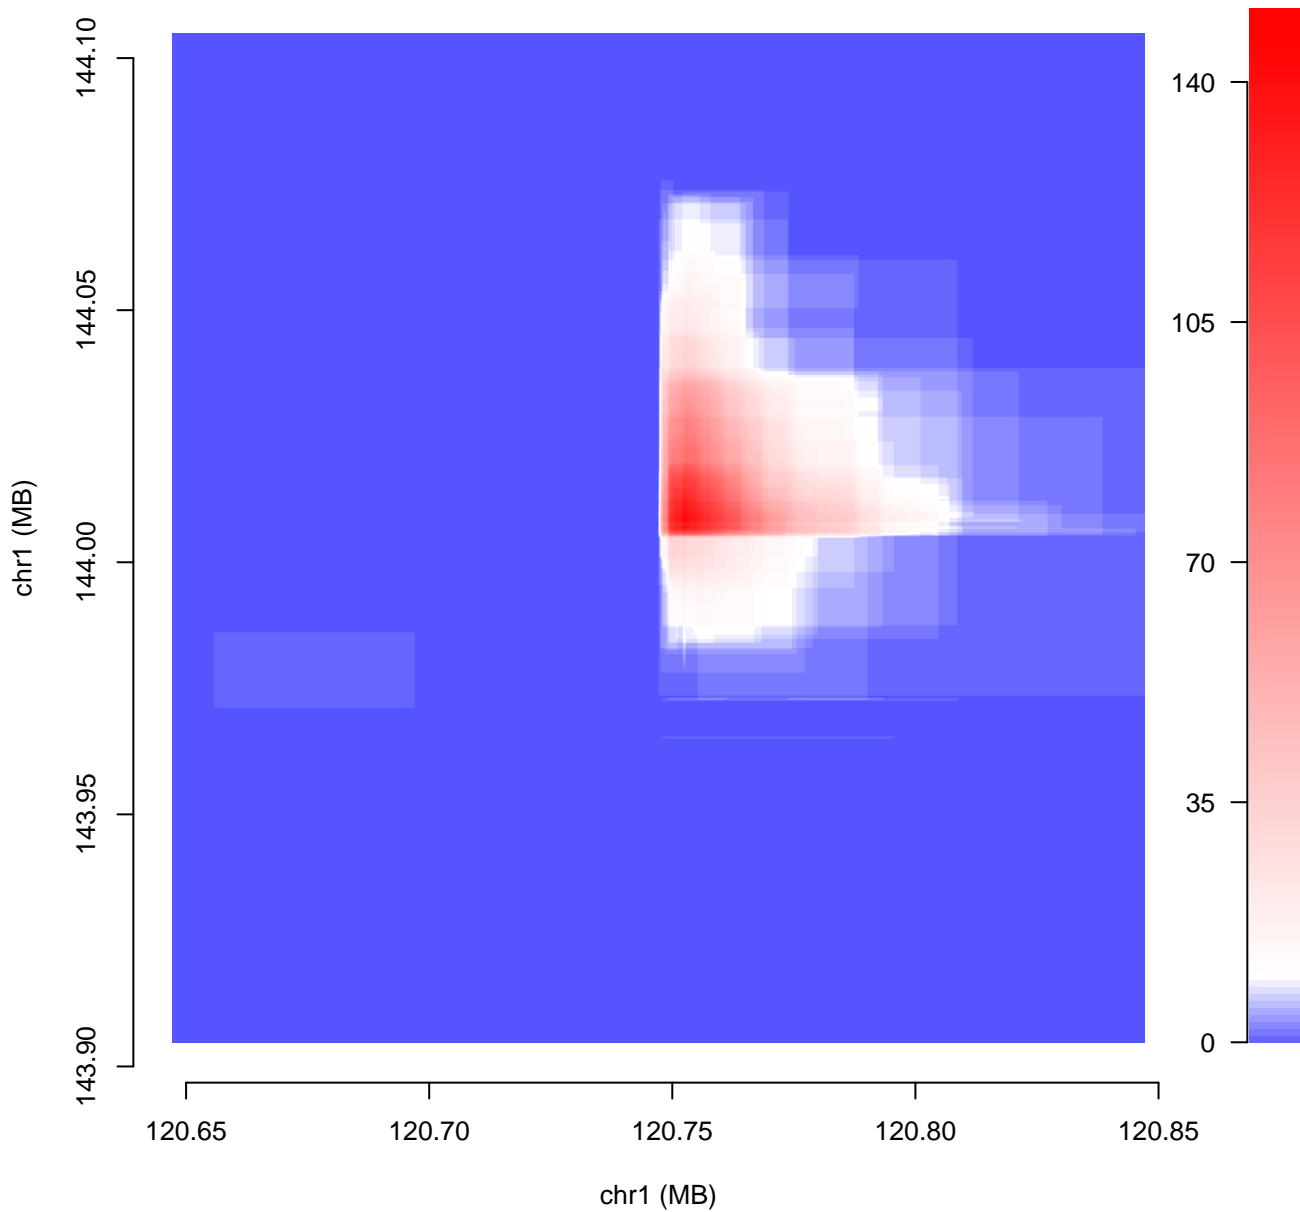

Supplement: Supplemental_Data.zip [file event_441.pdf › event_441.pdf]

Barcode

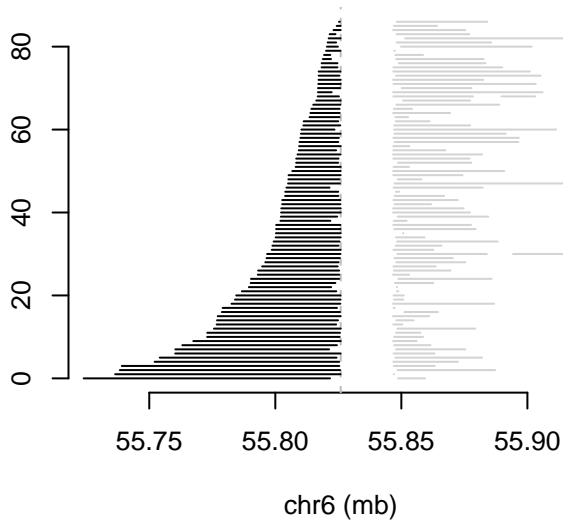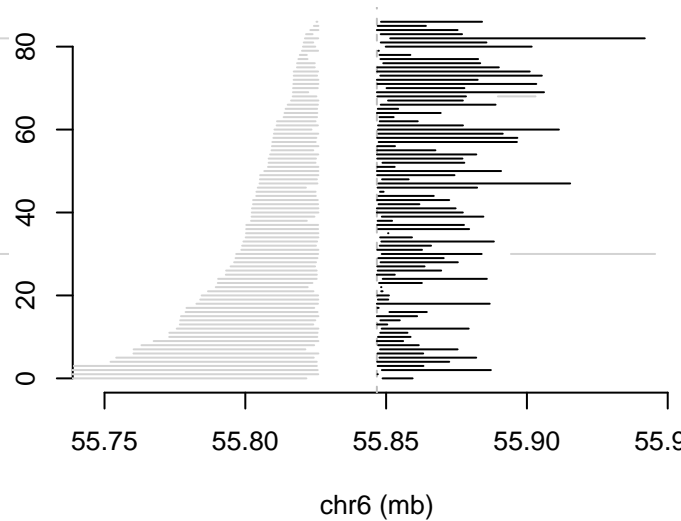

Copy number

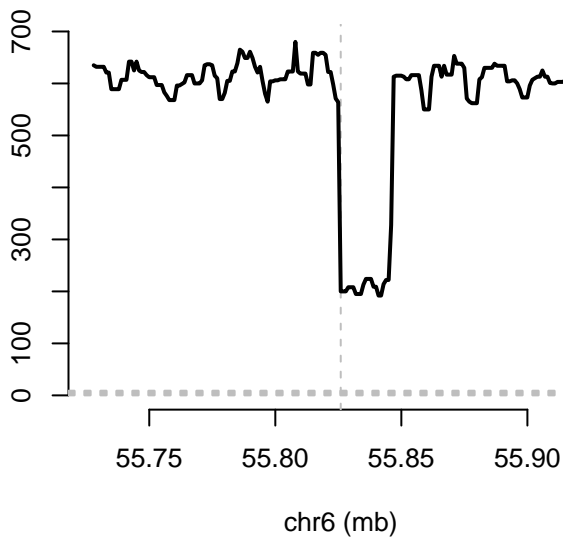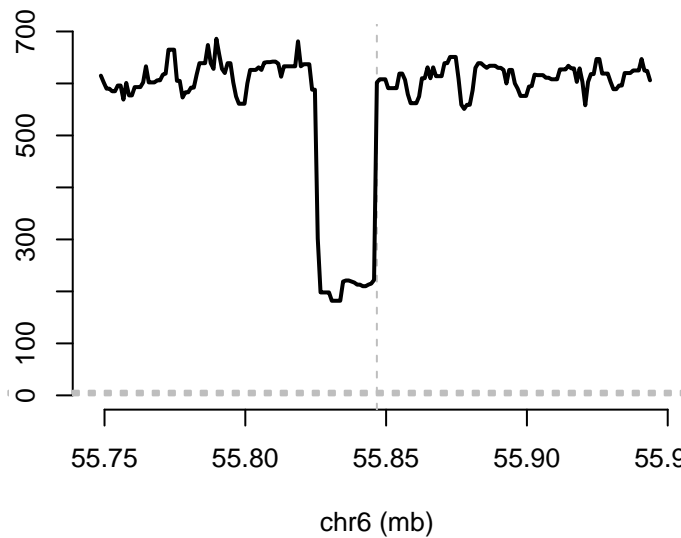

K562 chr6:55,825,957::chr6:55,846,712+-

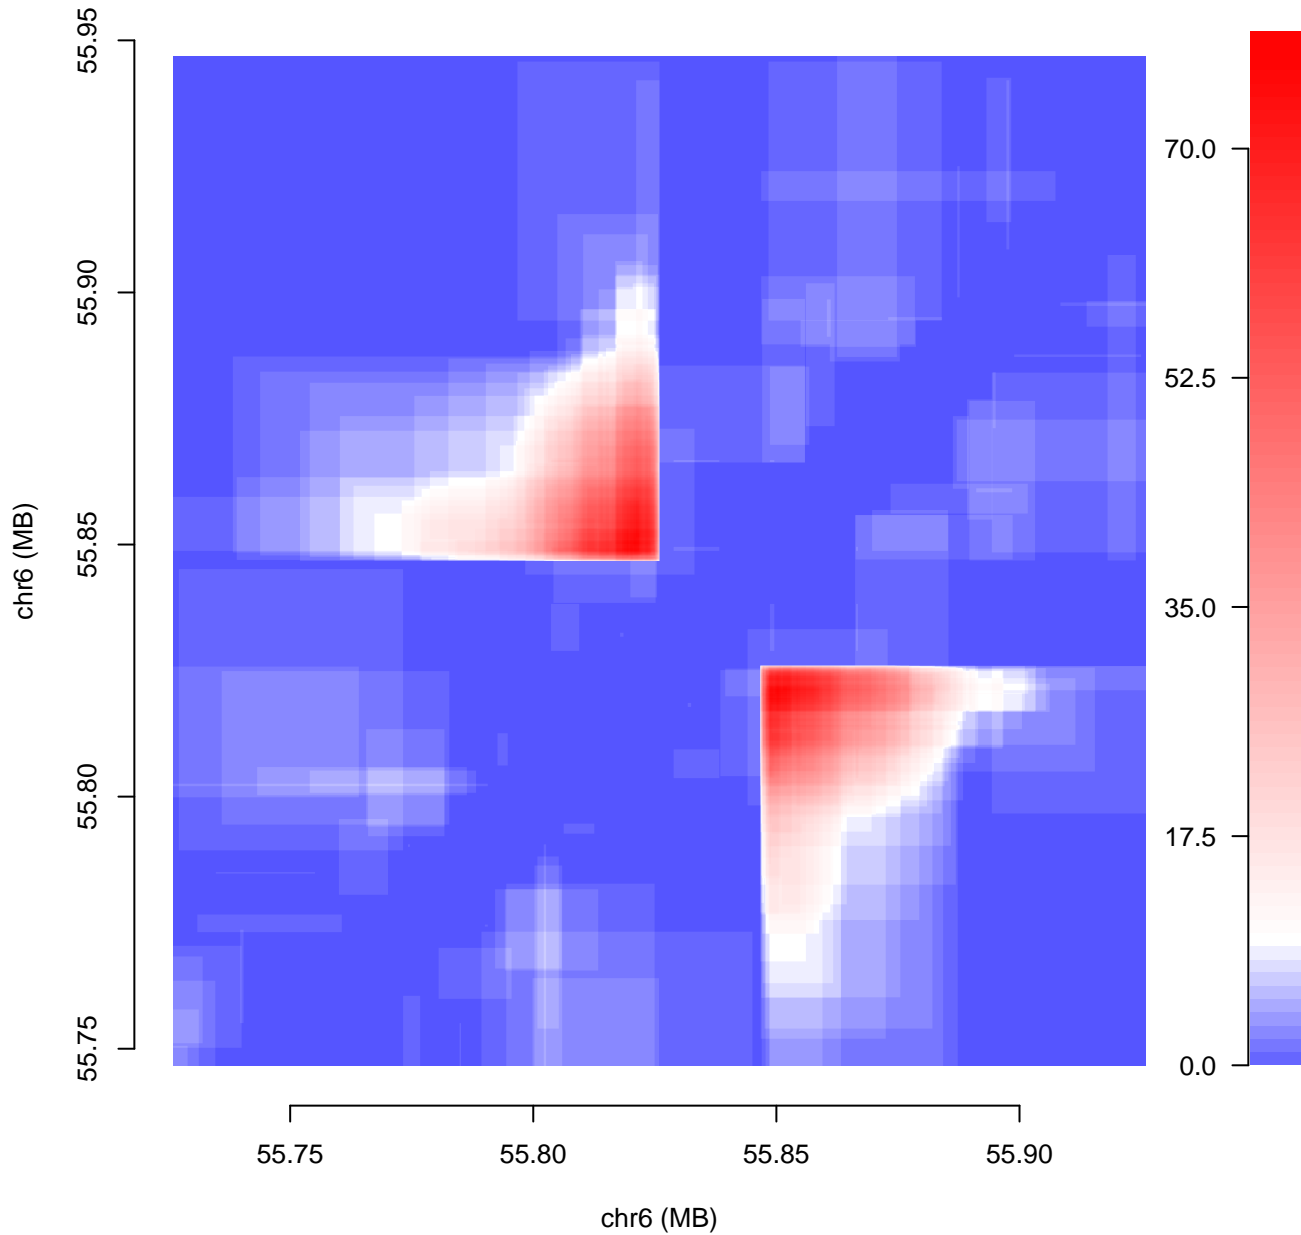

Supplement: Supplemental_Data.zip [file event_442.pdf › event_442.pdf]

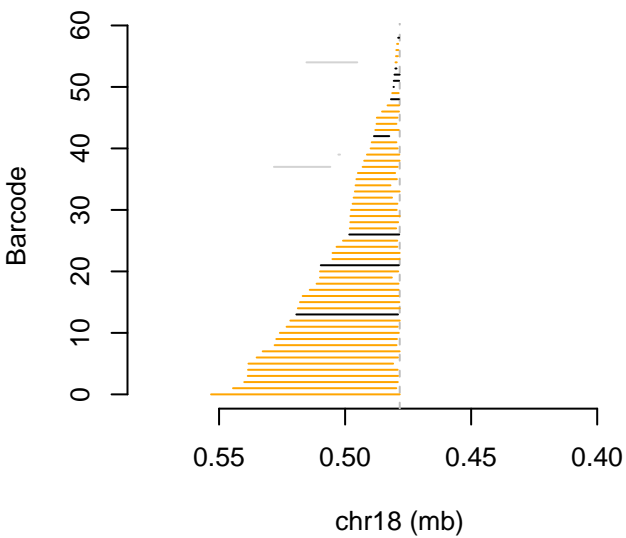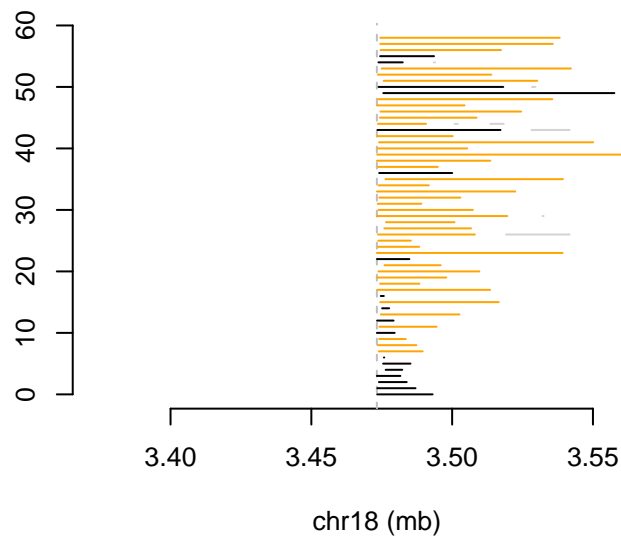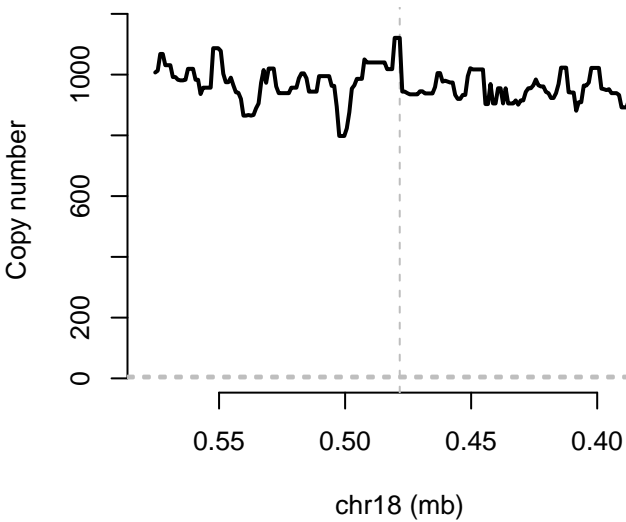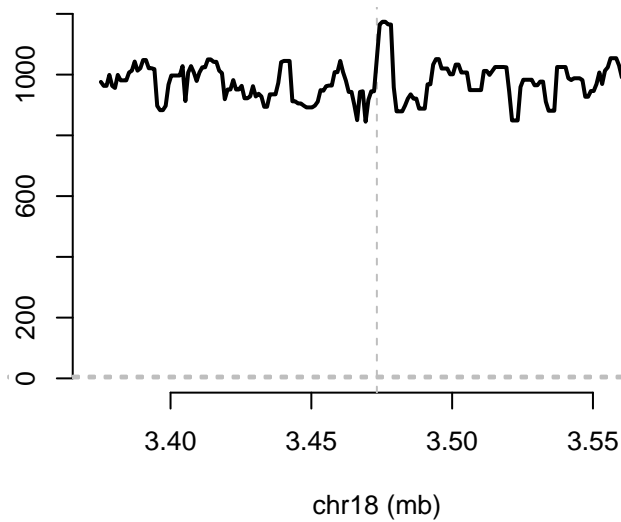

K562 chr18:3,473,272::chr18:478,329--

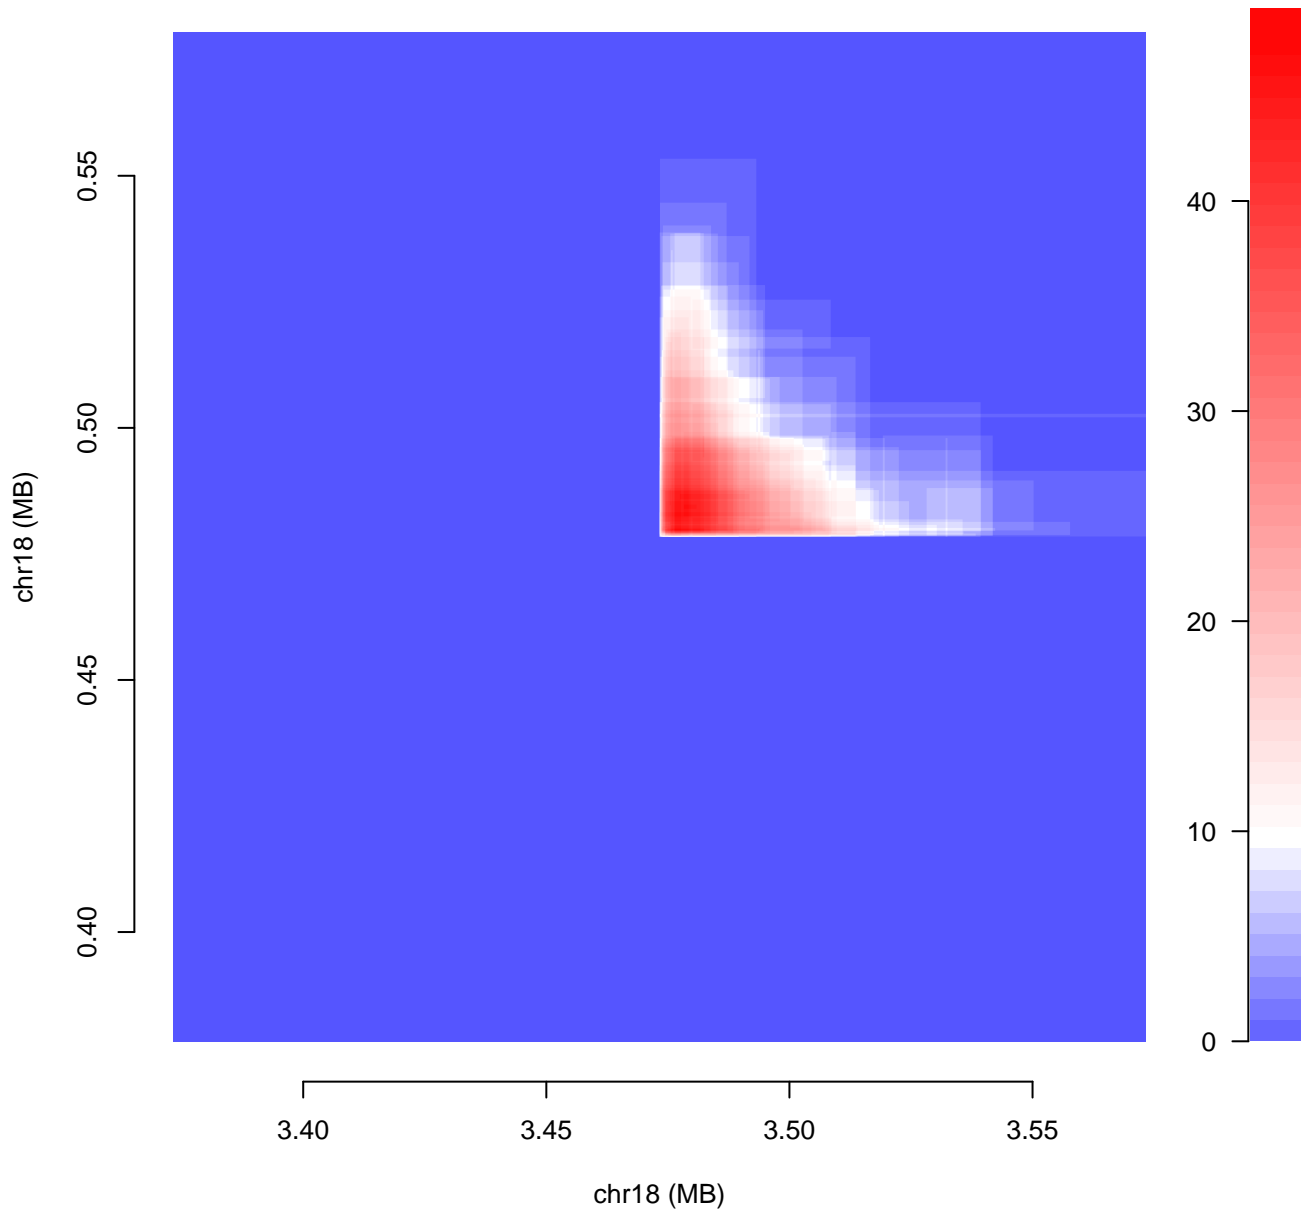

Supplement: Supplemental_Data.zip [file event_443.pdf › event_443.pdf]

Barcode

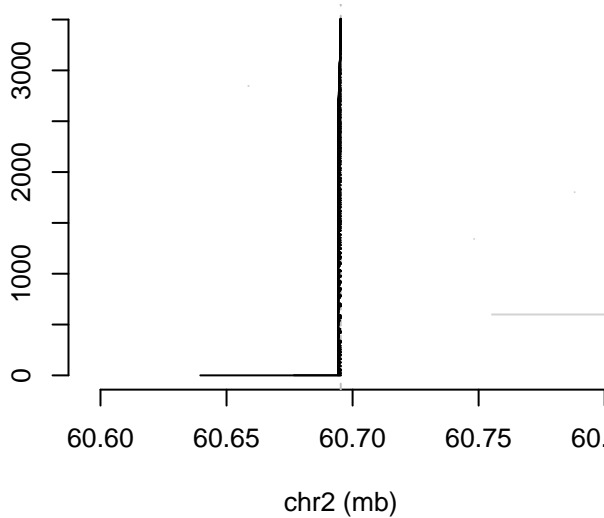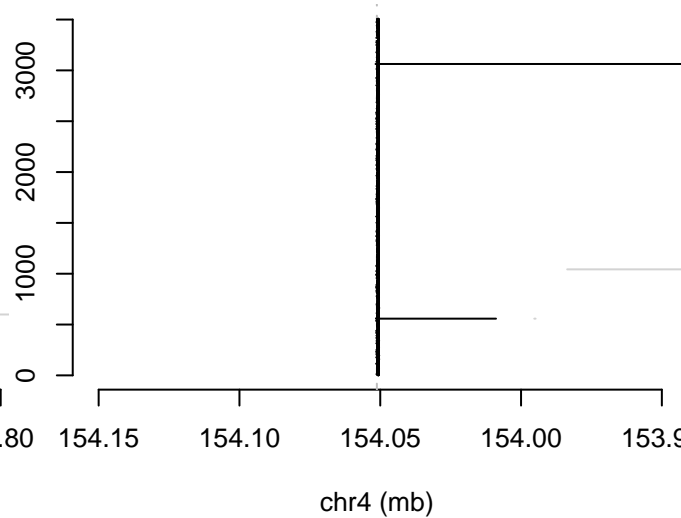

Copy number

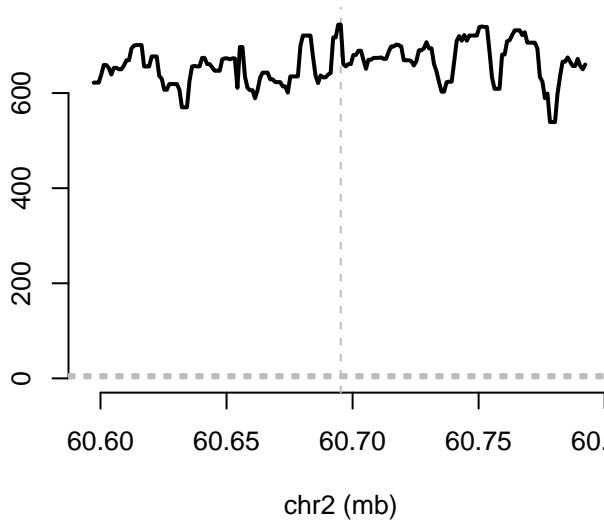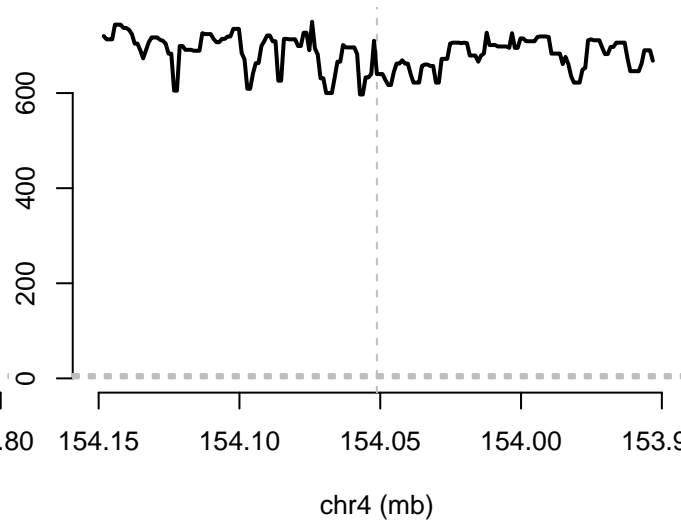

K562 chr4:154,051,200::chr2:60,695,300++

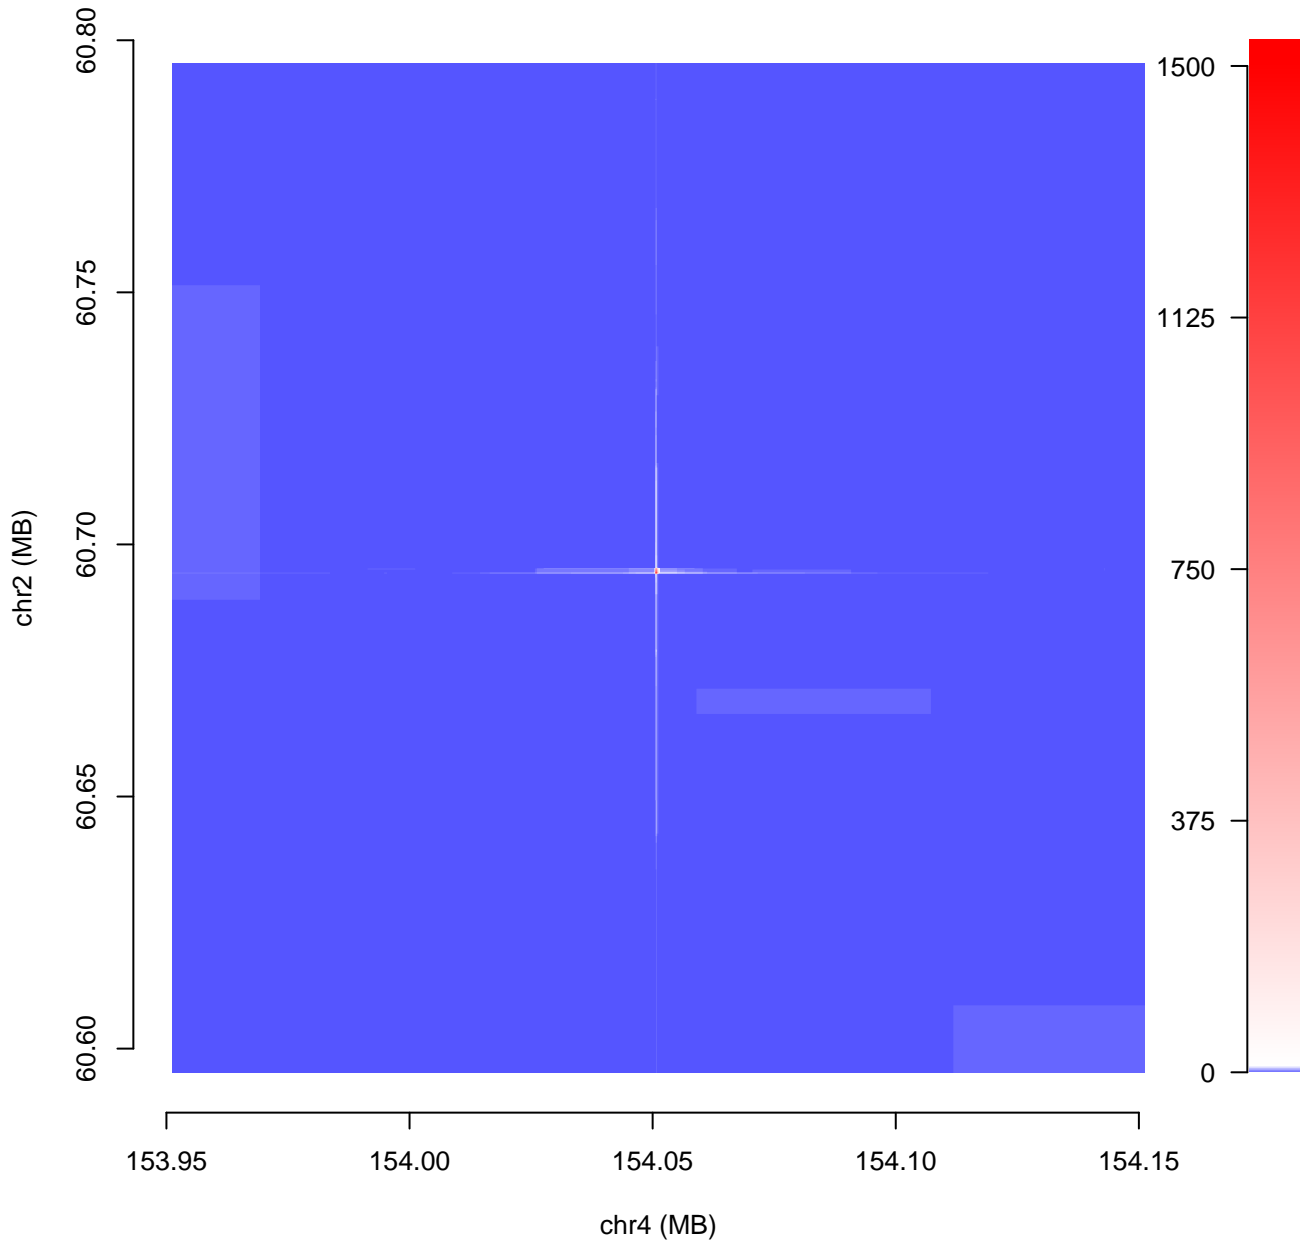

Supplement: Supplemental_Data.zip [file event_444.pdf › event_444.pdf]

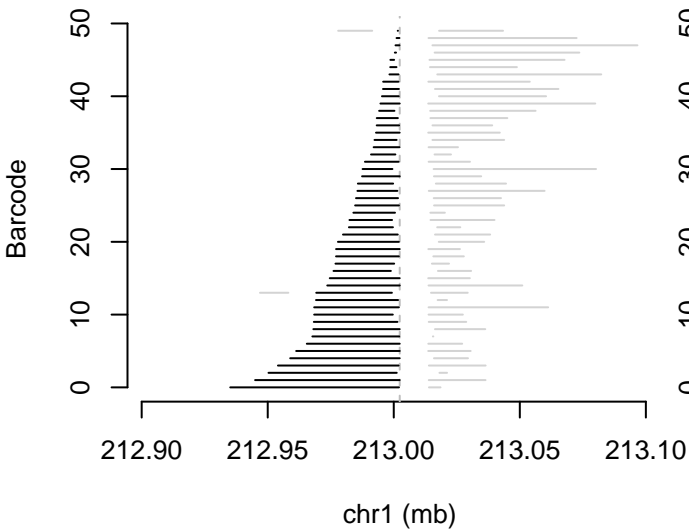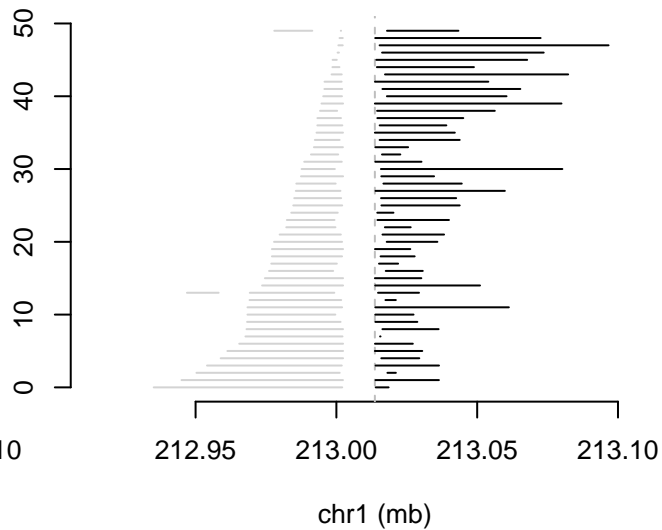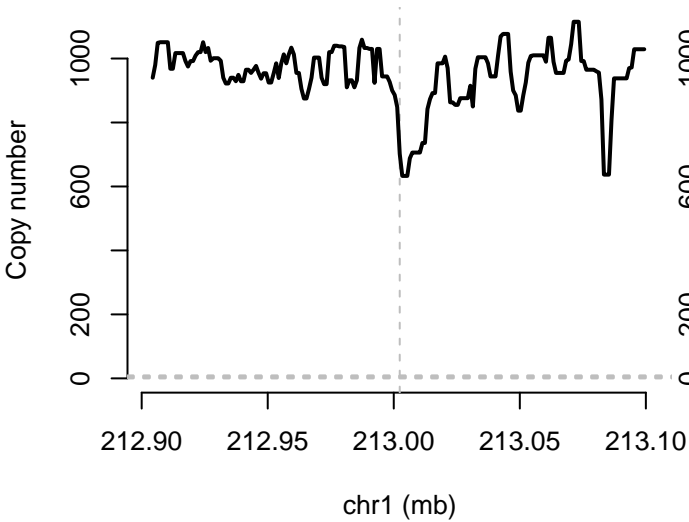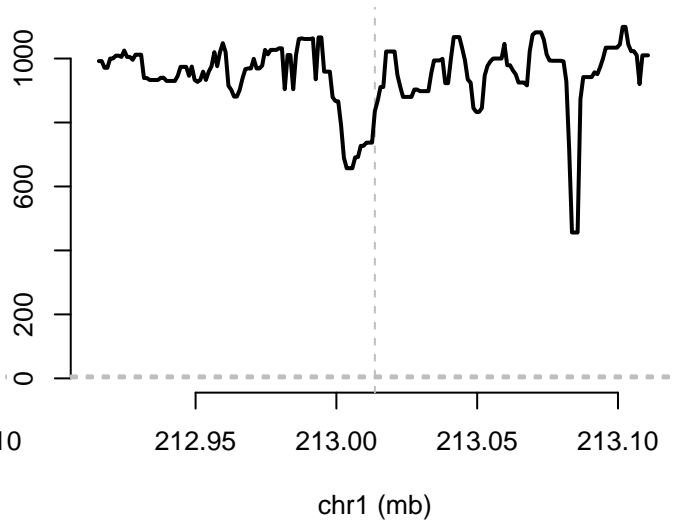

K562 chr1:213,002,371::chr1:213,013,665+-

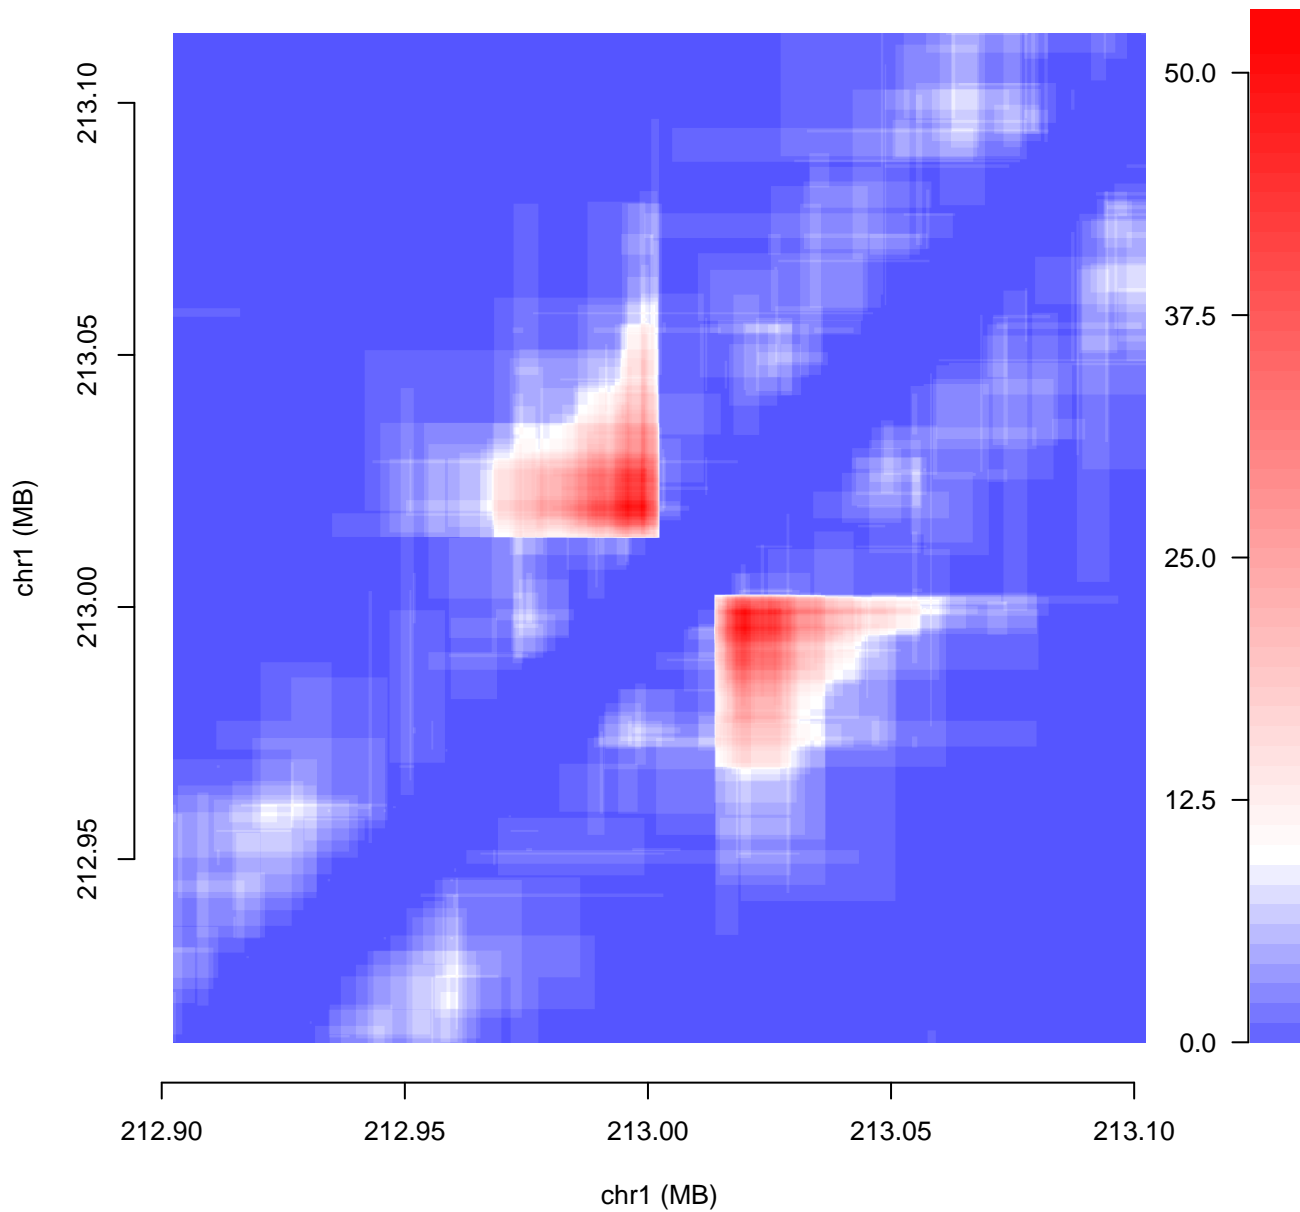

Supplement: Supplemental_Data.zip [file event_445.pdf › event_445.pdf]

Barcode

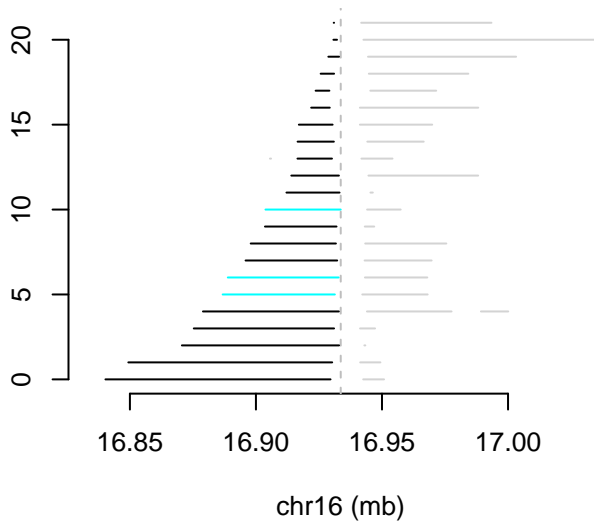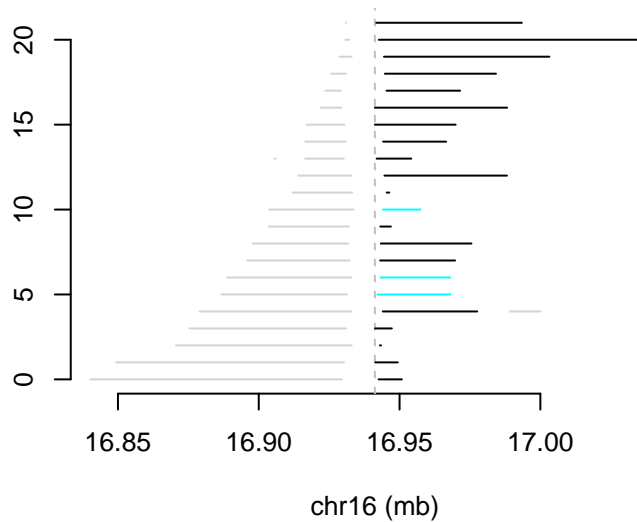

Copy number

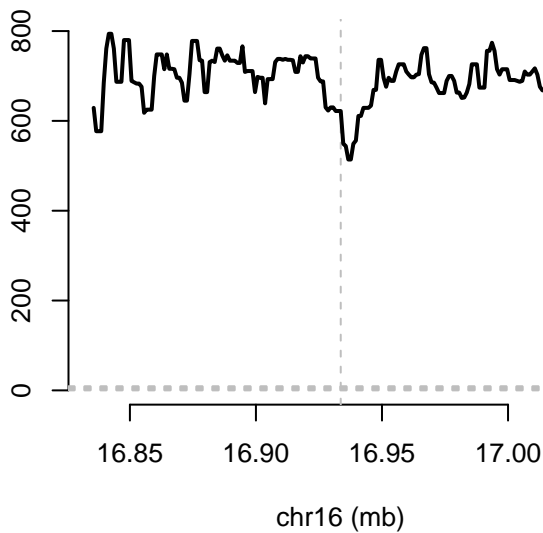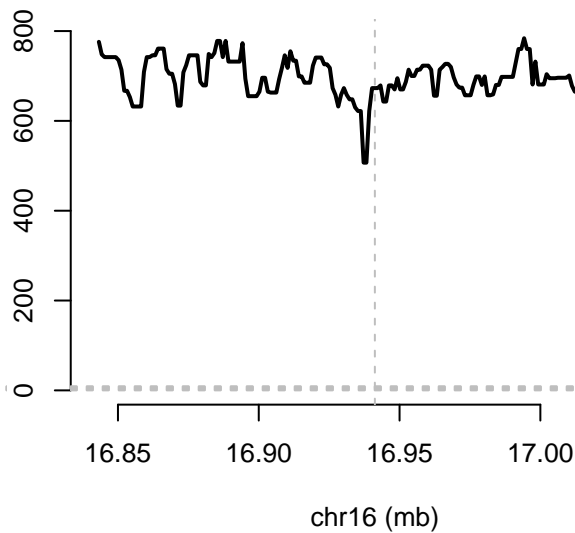

K562 chr16:16,933,638::chr16:16,941,230+-

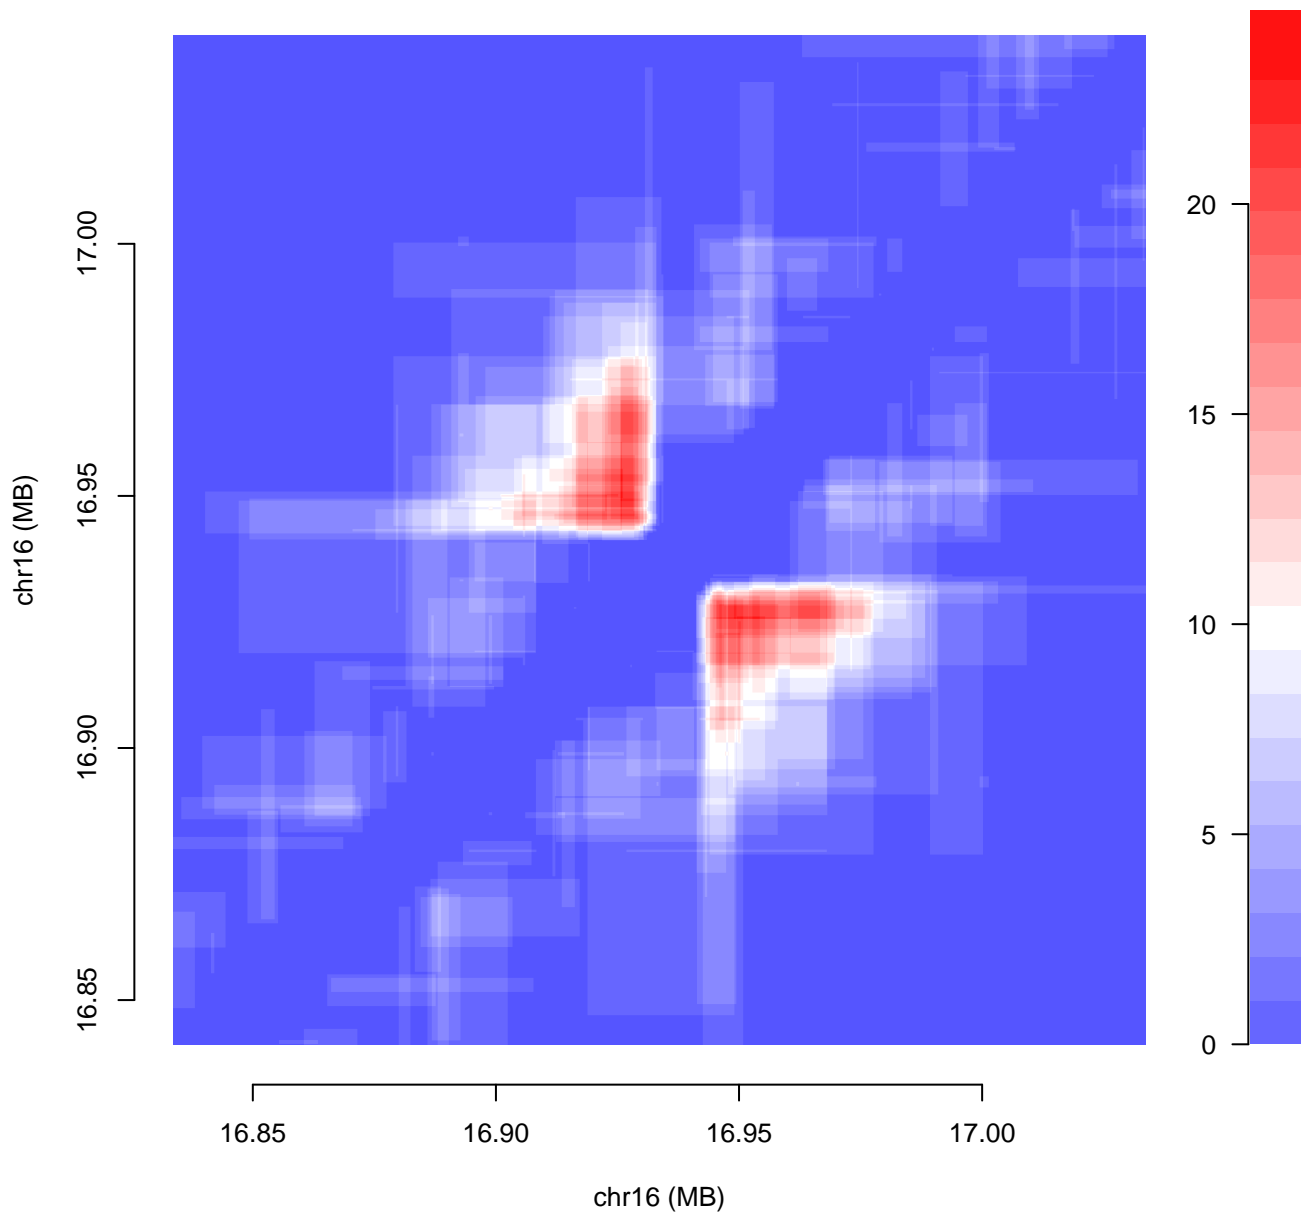

Supplement: Supplemental_Data.zip [file event_446.pdf › event_446.pdf]

Barcode

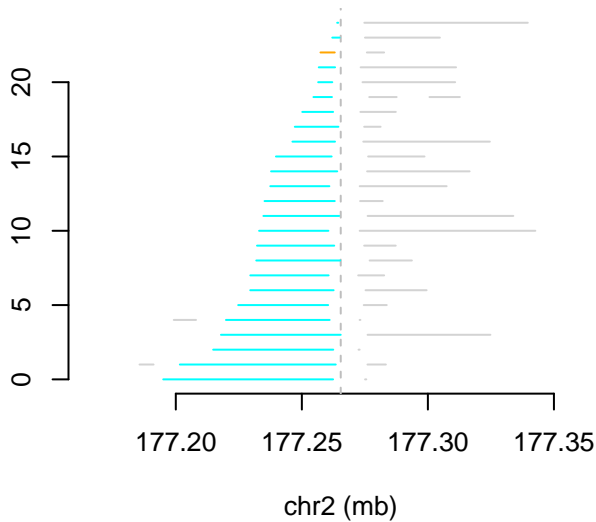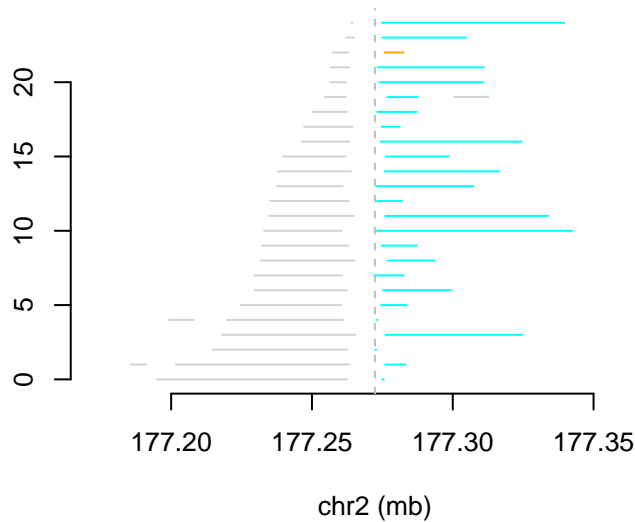

Copy number

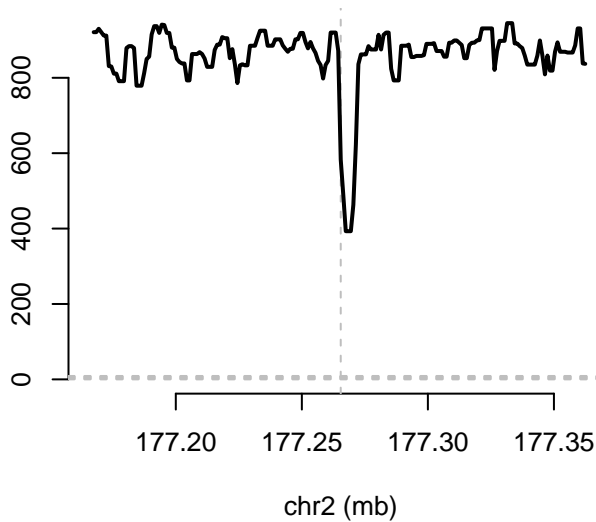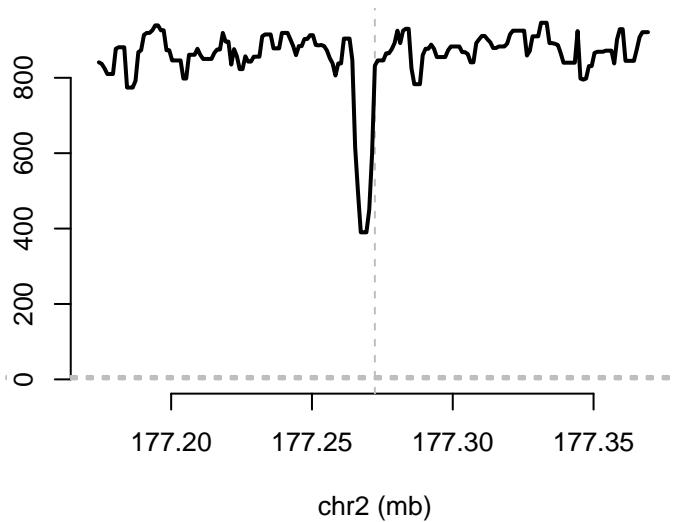

K562 chr2:177,265,431::chr2:177,272,343+-

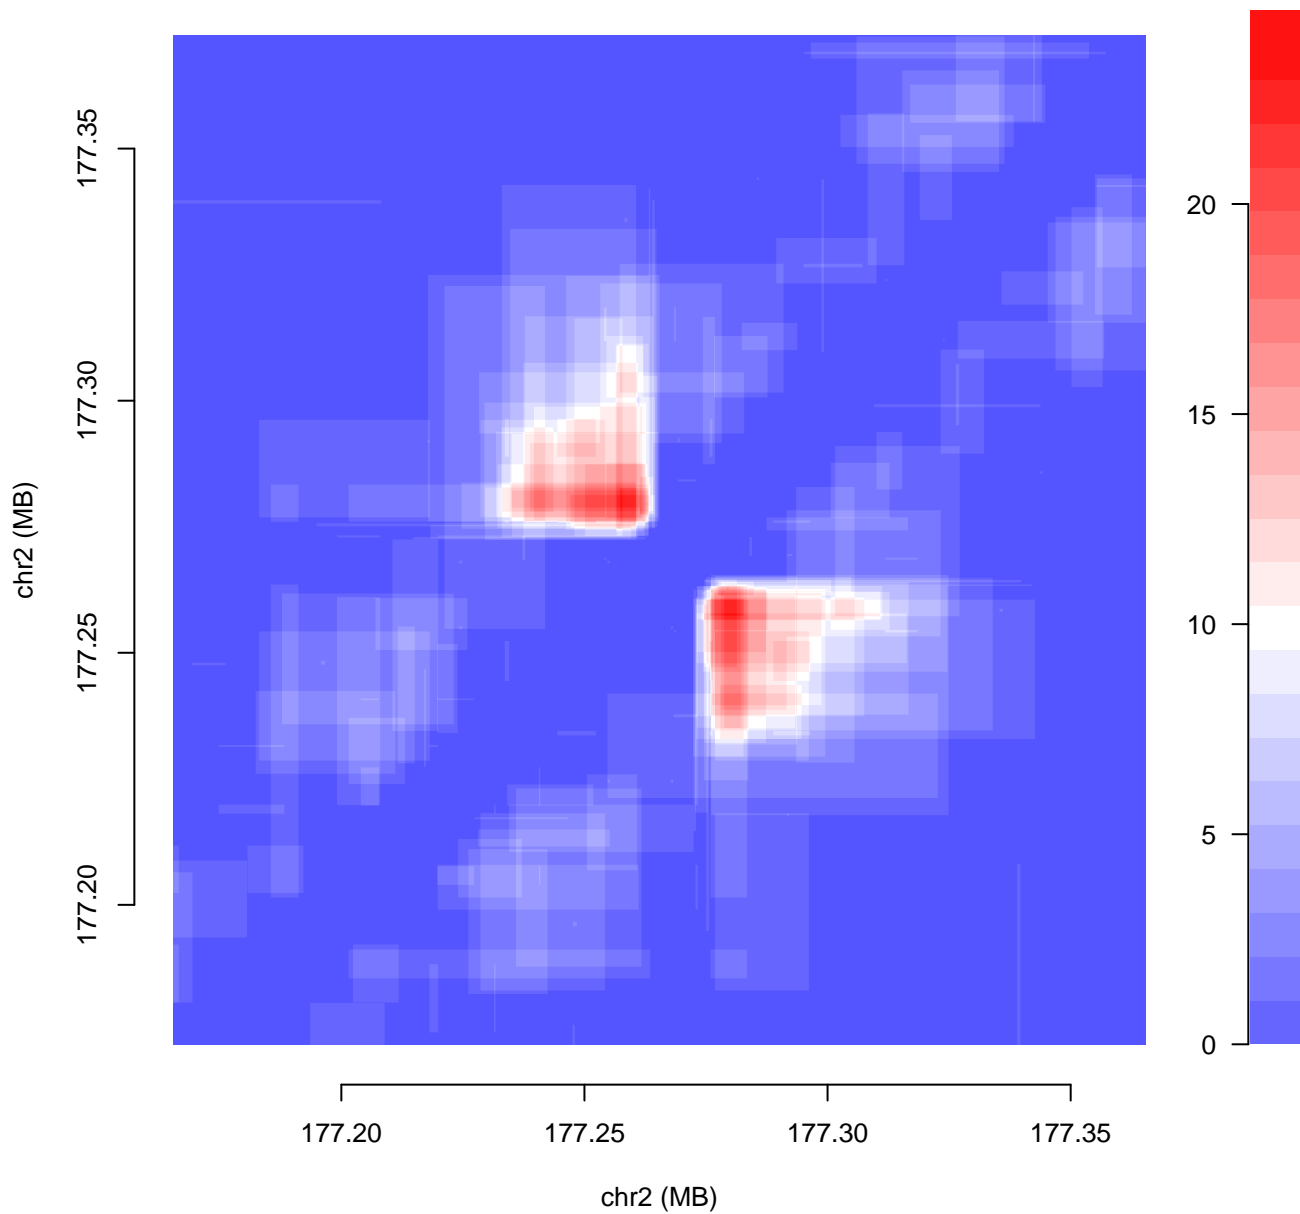

Supplement: Supplemental_Data.zip [file event_447.pdf › event_447.pdf]

Barcode

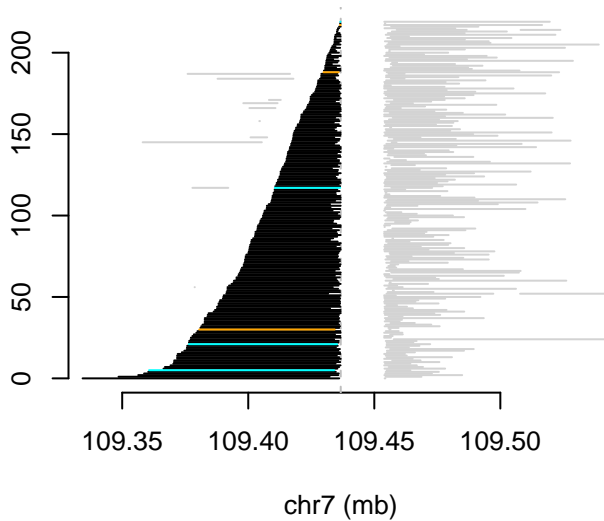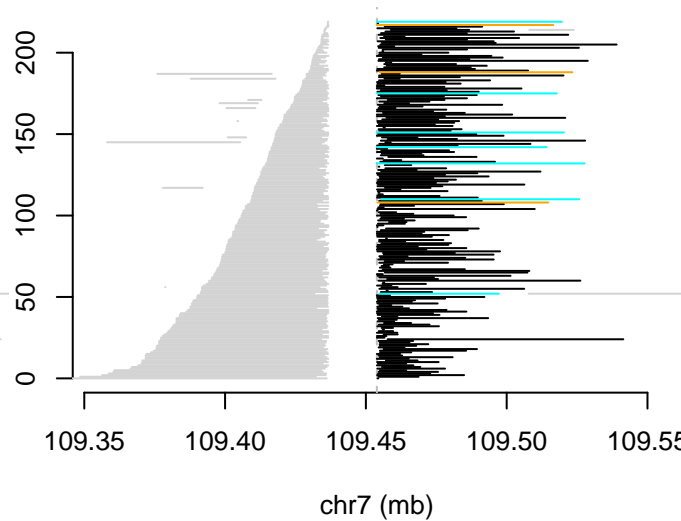

Copy number

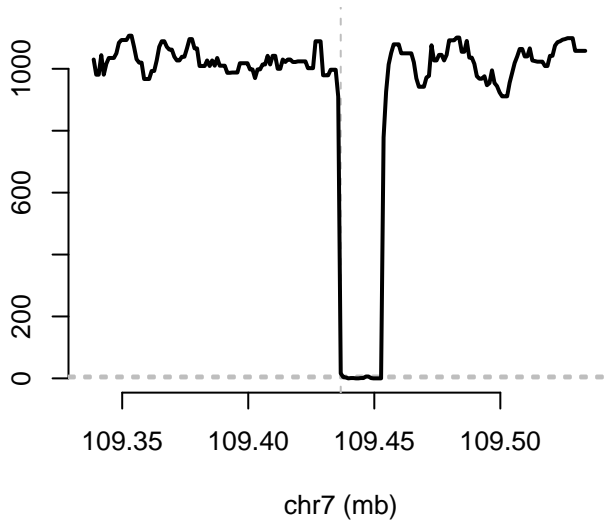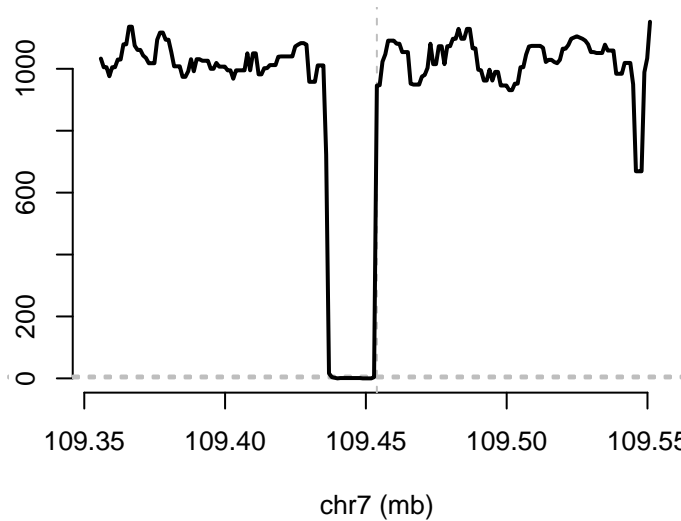

K562 chr7:109,436,689::chr7:109,453,901+-

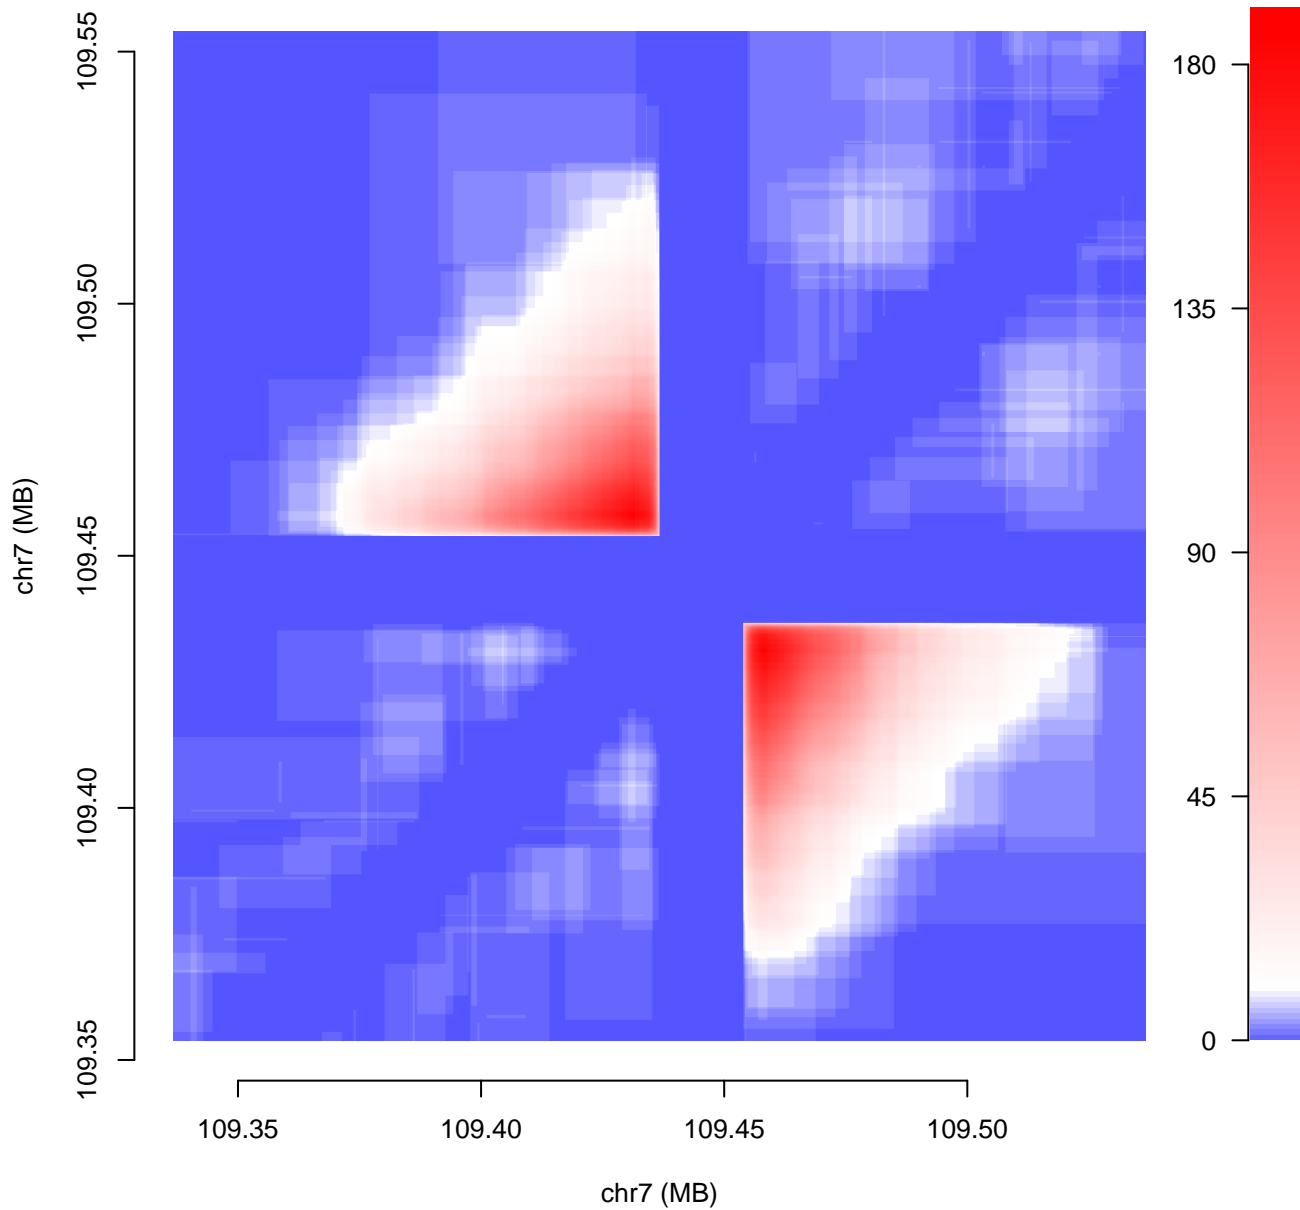

Supplement: Supplemental_Data.zip [file event_448.pdf › event_448.pdf]

Barcode

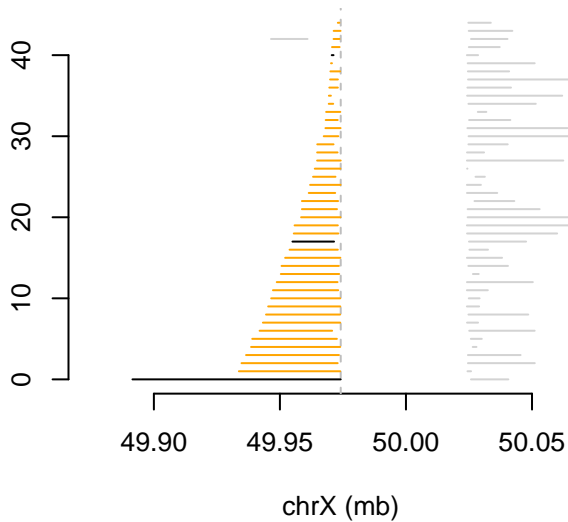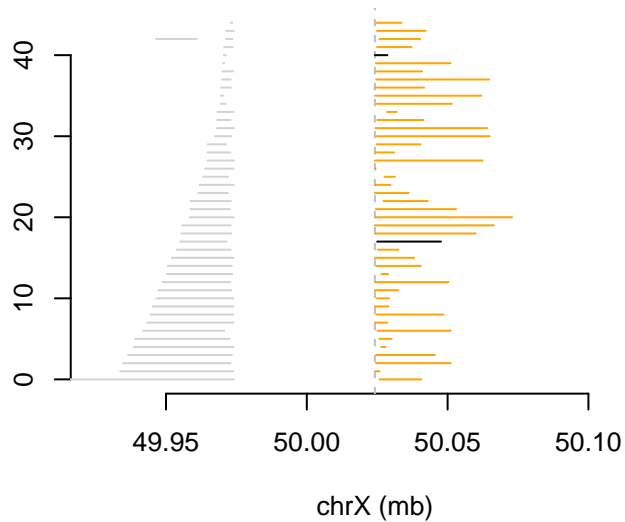

Copy number

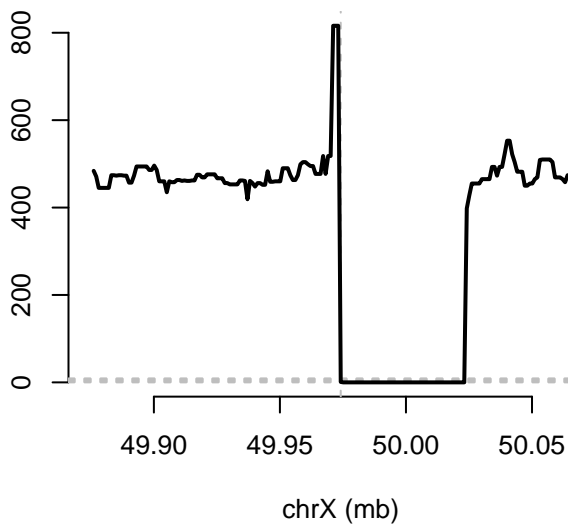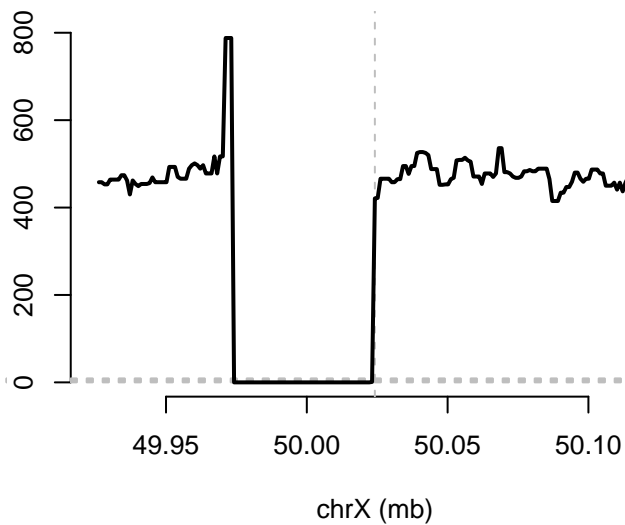

K562 chrX:50,024,171::chrX:49,974,130-+

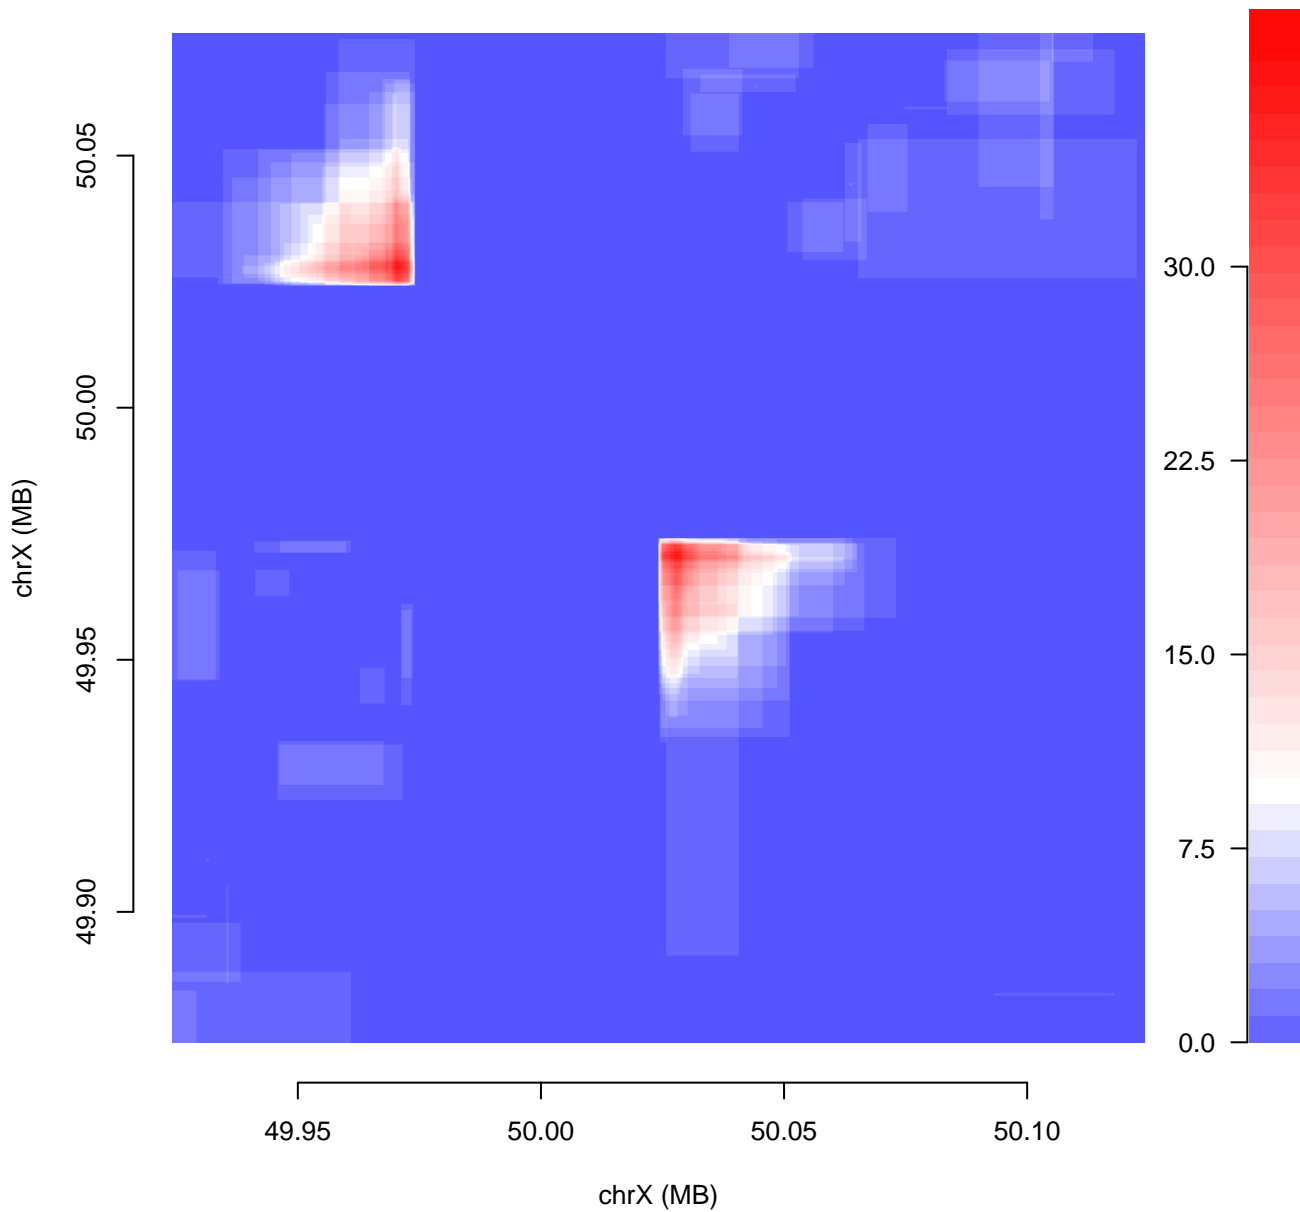

Supplement: Supplemental_Data.zip [file event_449.pdf › event_449.pdf]

Barcode

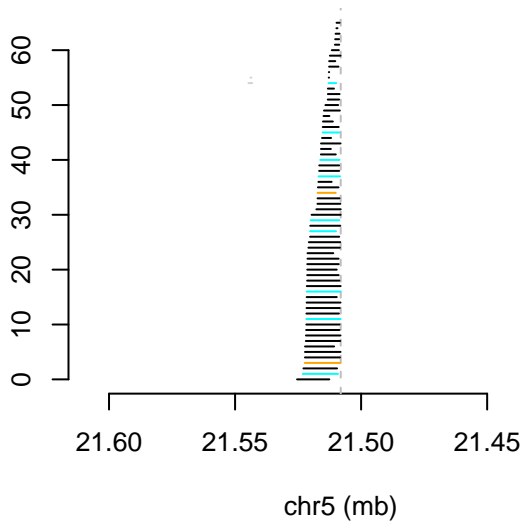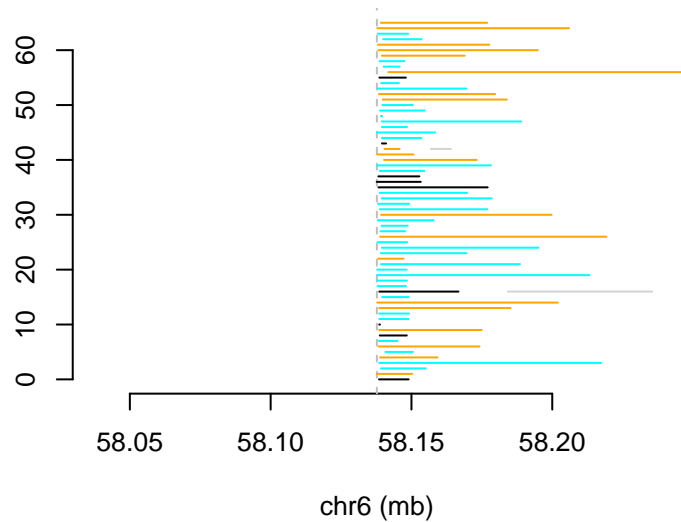

Copy number

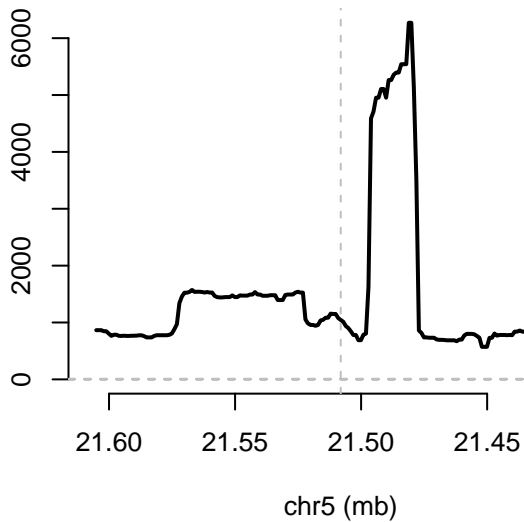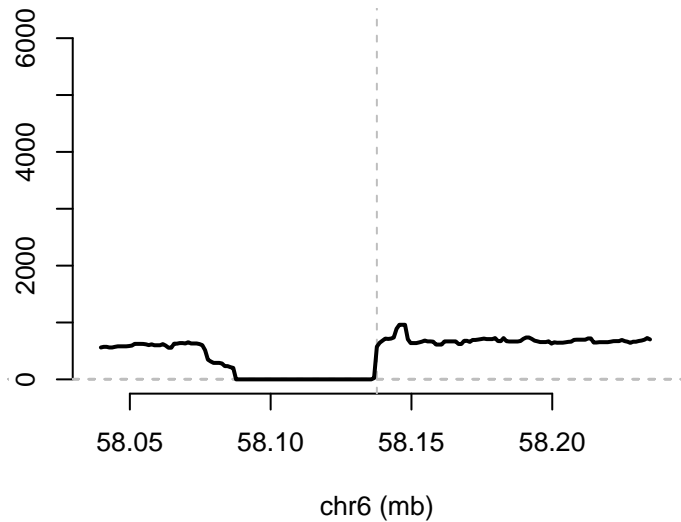

K562 chr5:21,508,081::chr6:58,137,721--

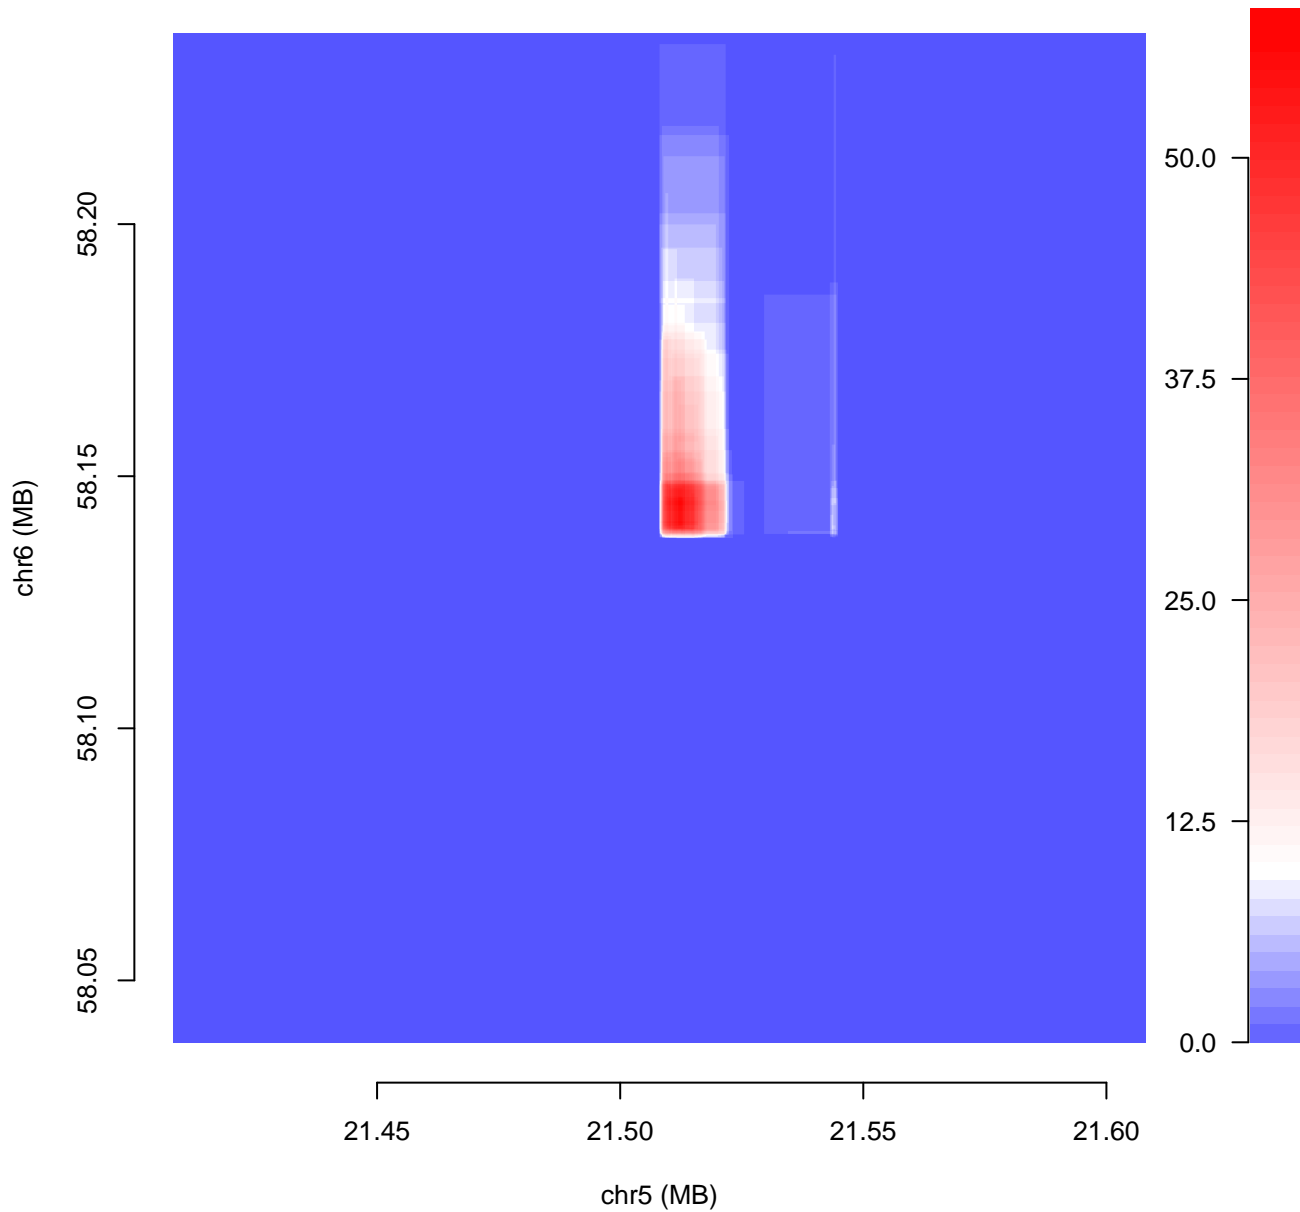

Supplement: Supplemental_Data.zip [file event_45.pdf › event_45.pdf]

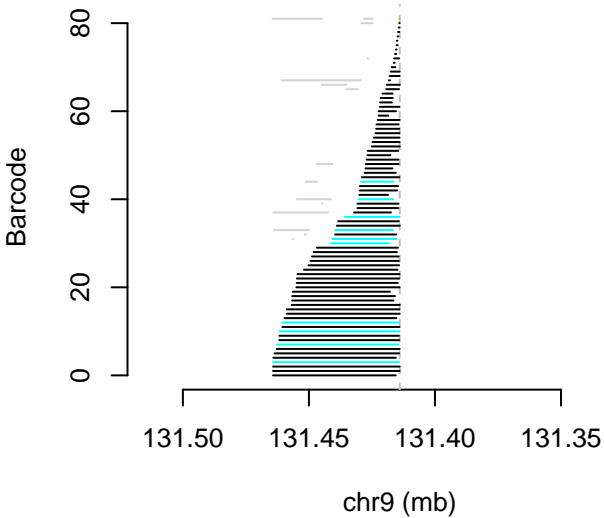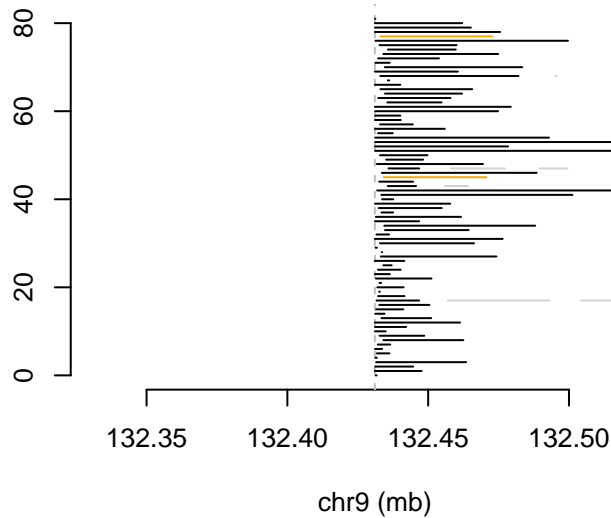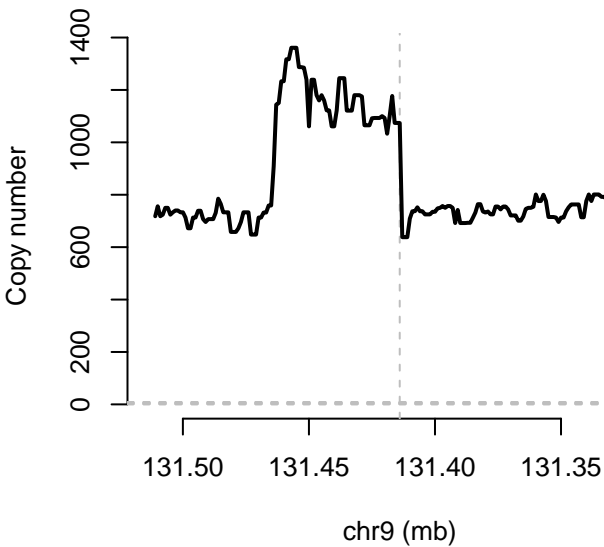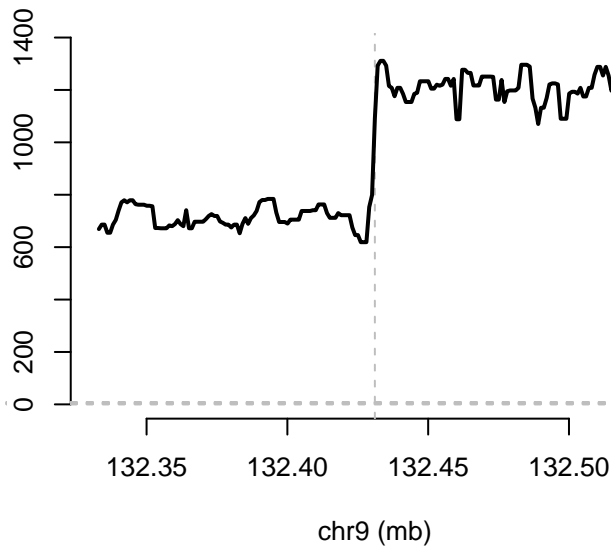

K562 chr9:132,431,076::chr9:131,413,976--

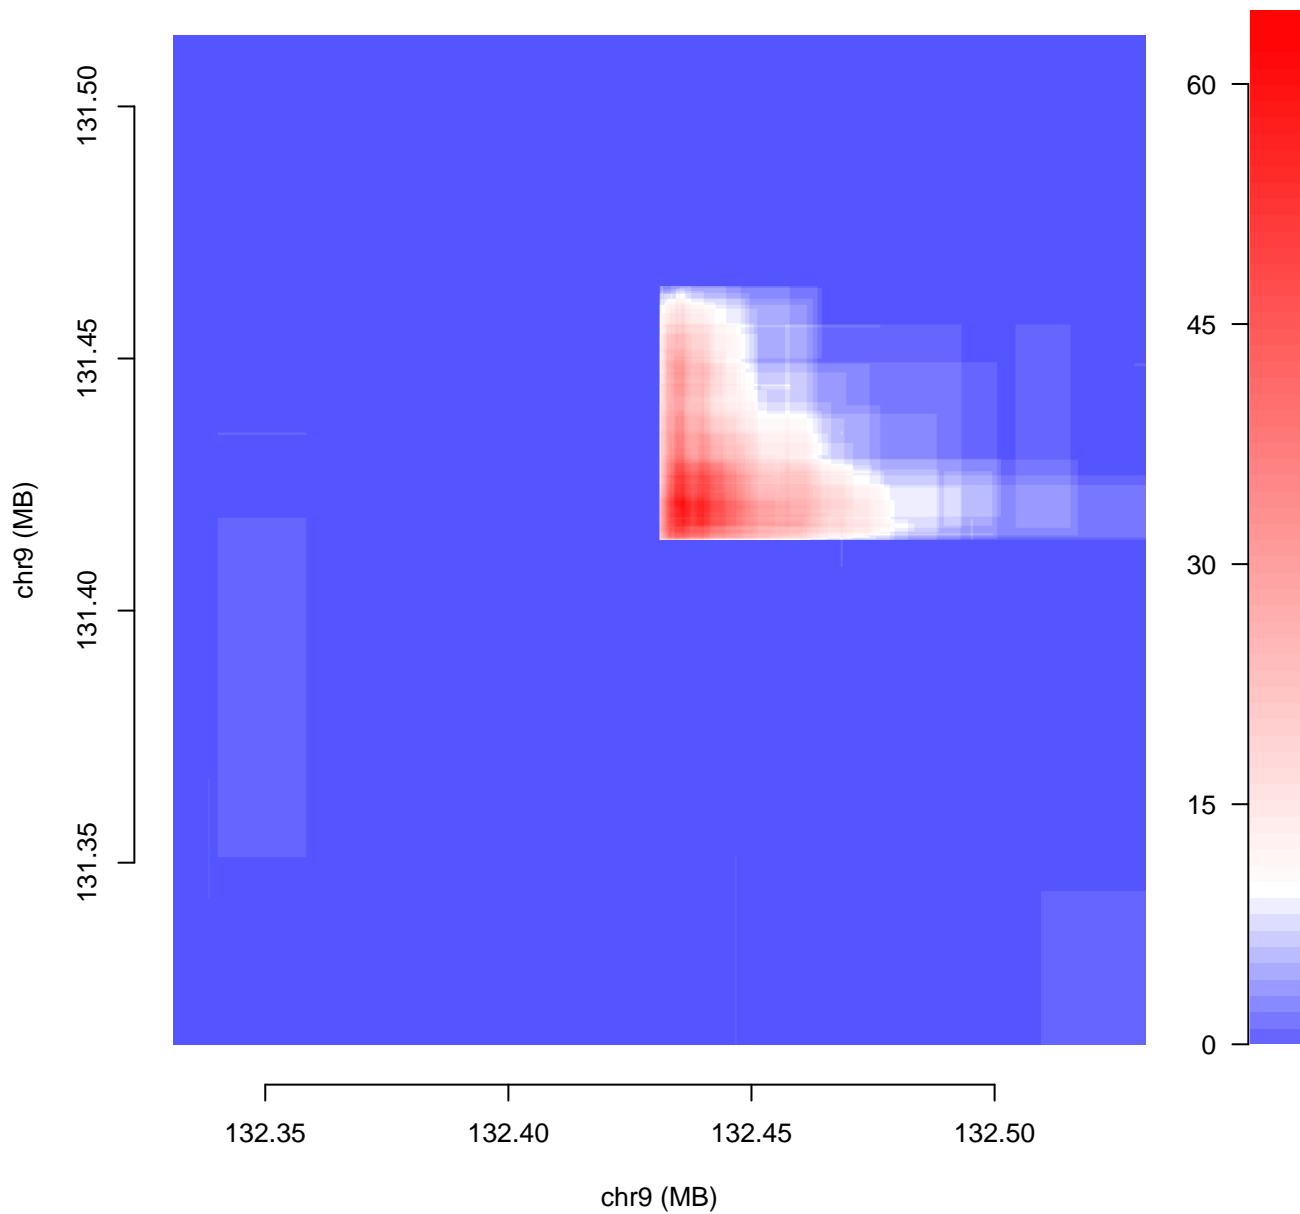

Supplement: Supplemental_Data.zip [file event_450.pdf › event_450.pdf]

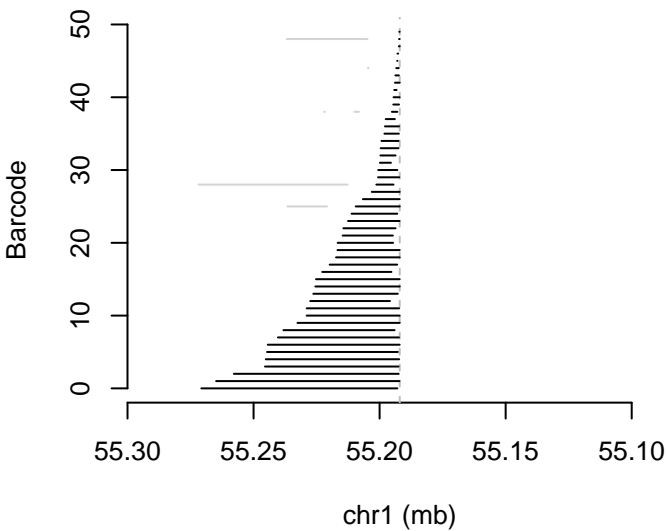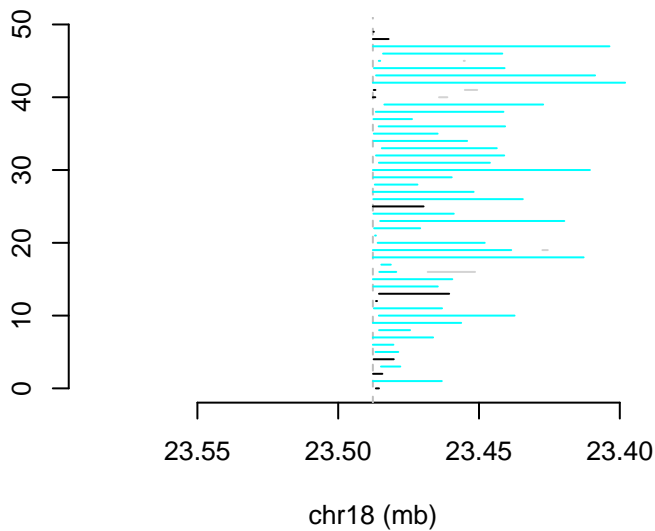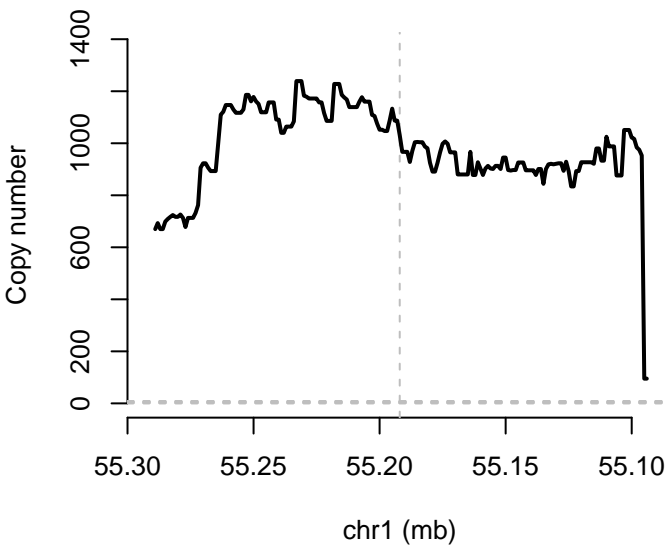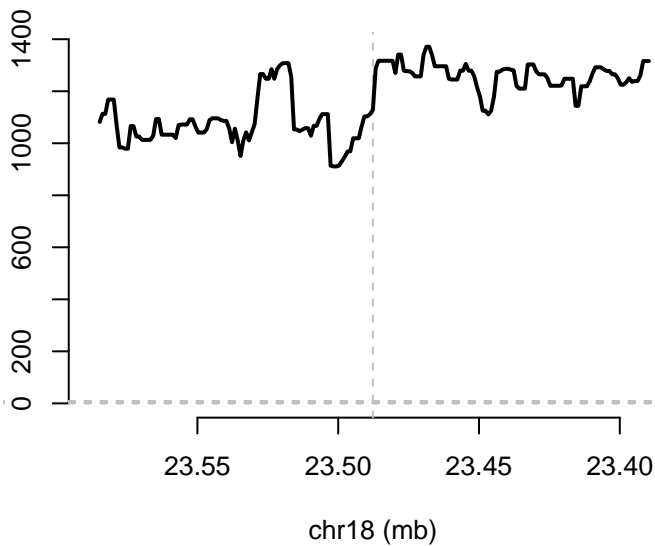

K562 chr18:23,487,685::chr1:55,192,012+-

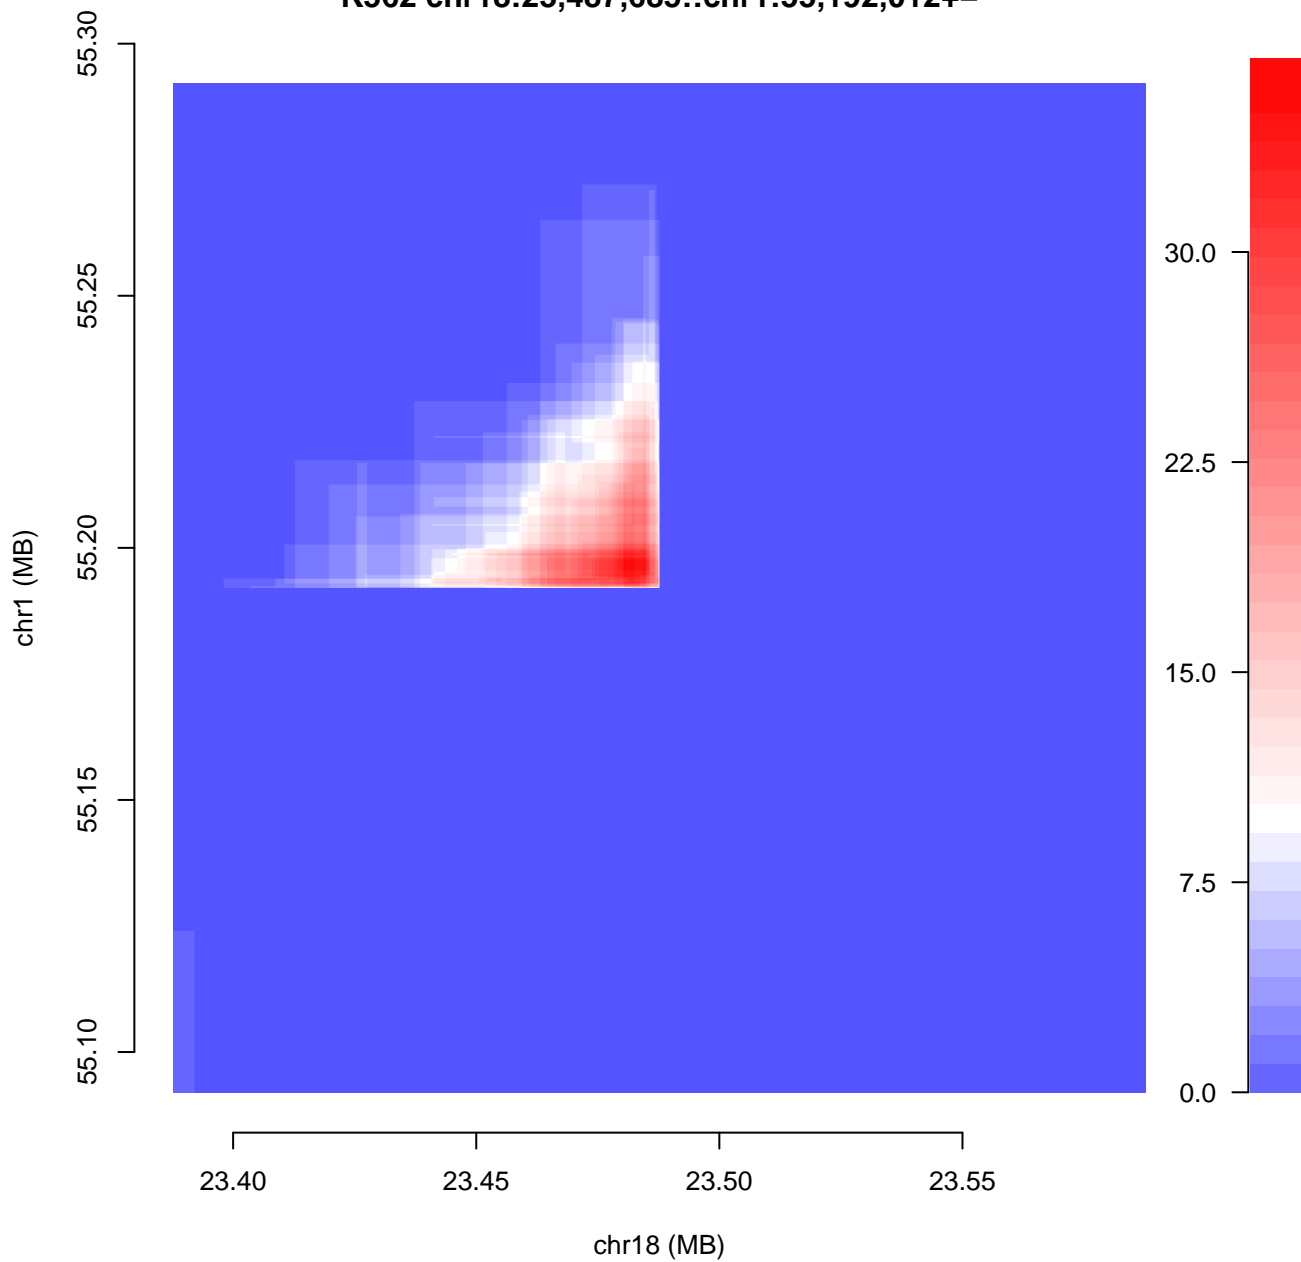

Supplement: Supplemental_Data.zip [file event_451.pdf › event_451.pdf]

Barcode

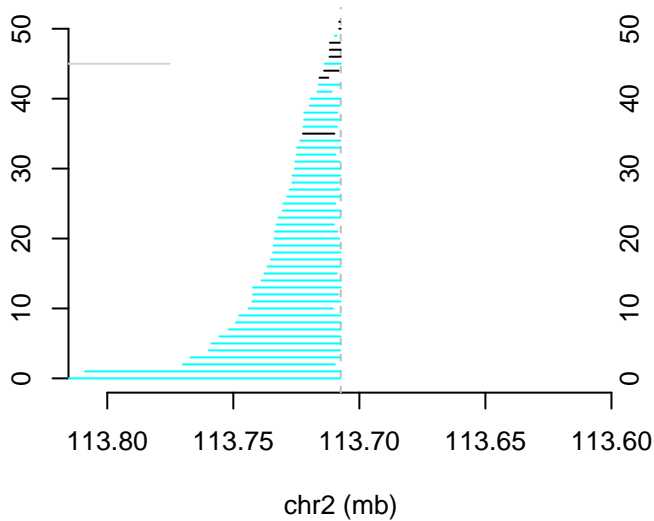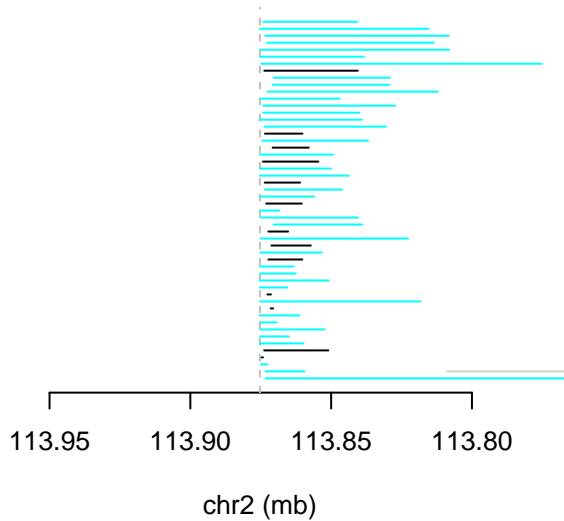

Copy number

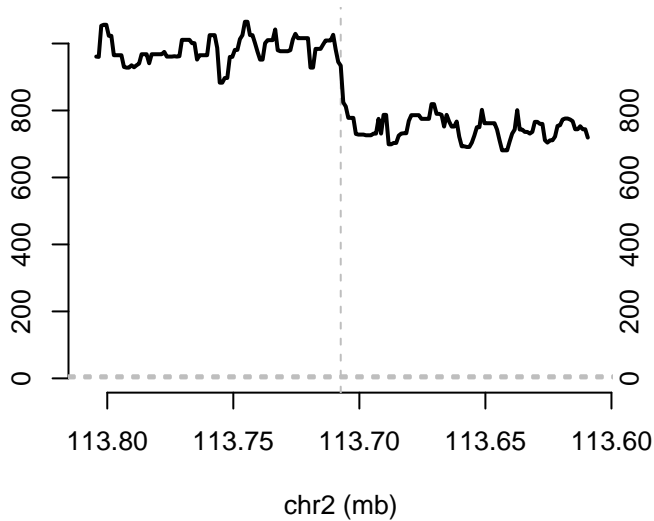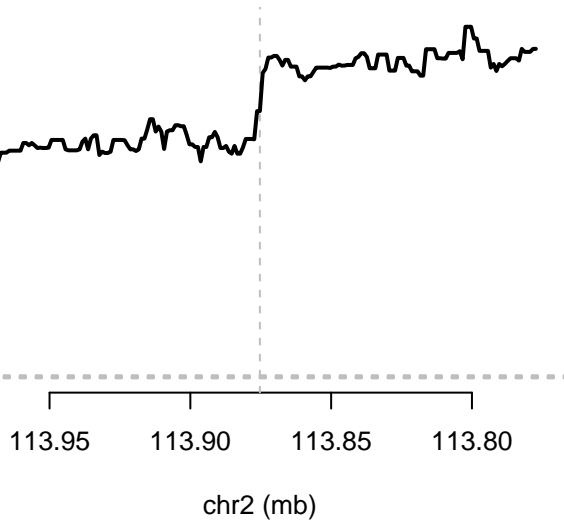

K562 chr2:113,875,314::chr2:113,707,388+-

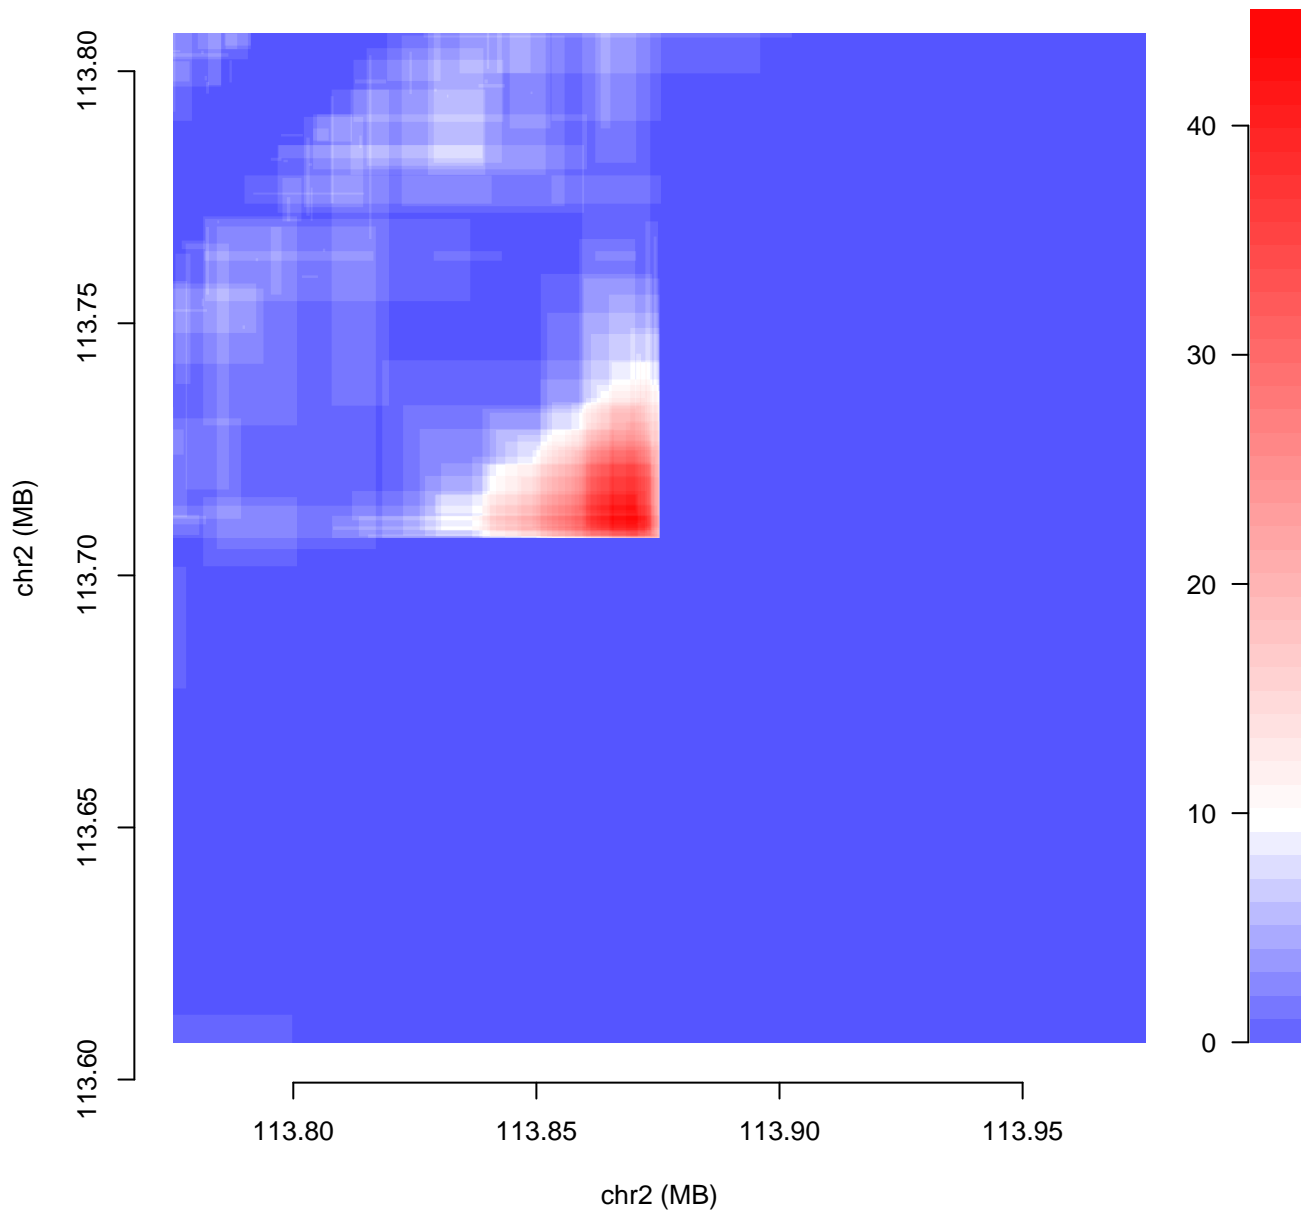

Supplement: Supplemental_Data.zip [file event_452.pdf › event_452.pdf]

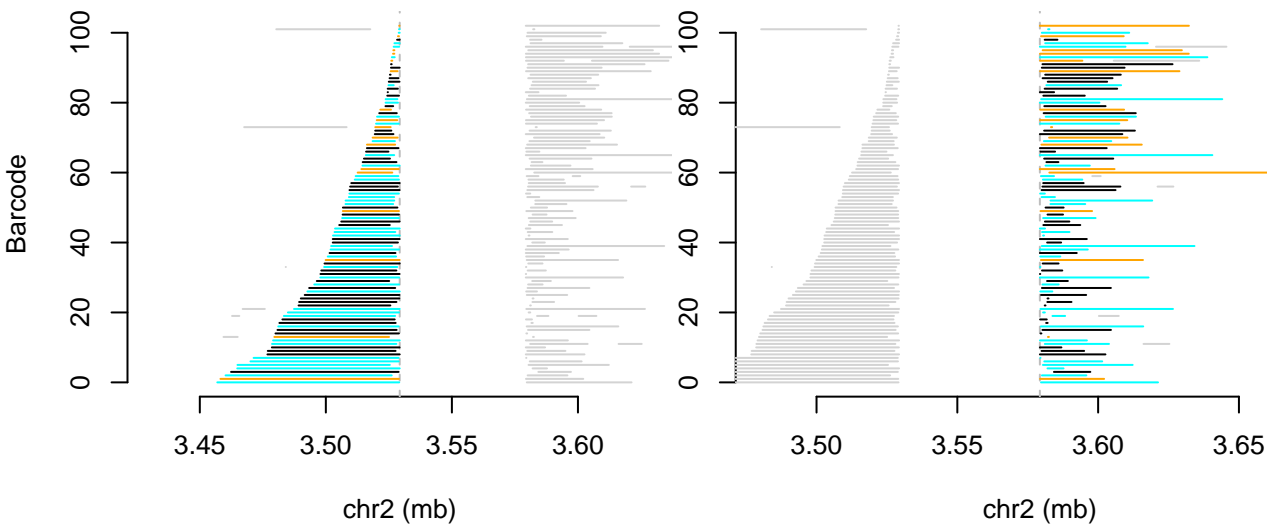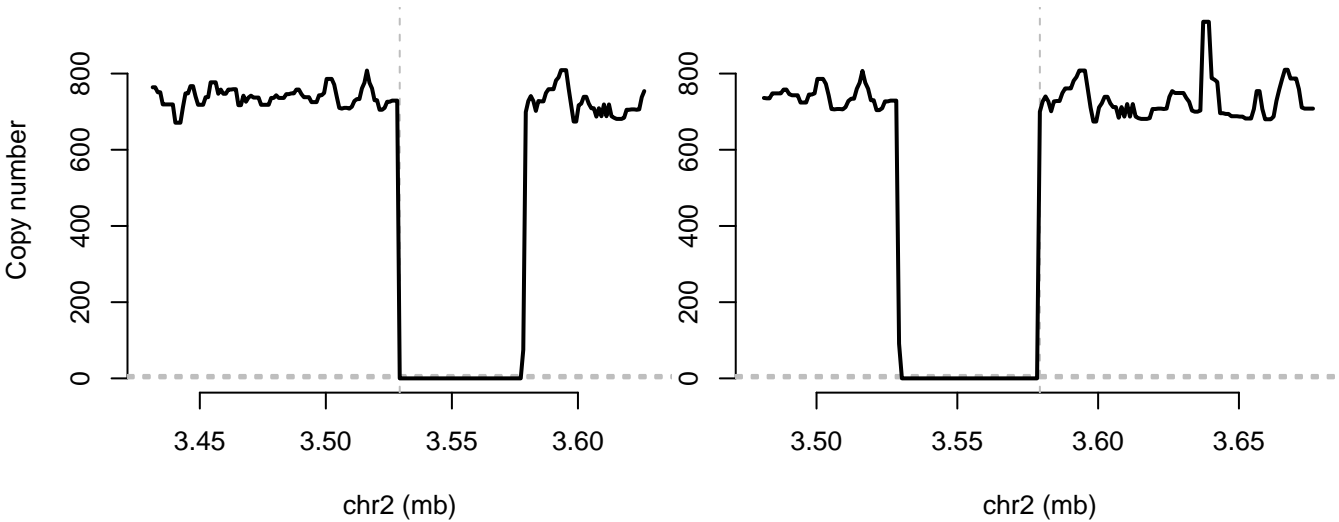

K562 chr2:3,529,313::chr2:3,579,311+-

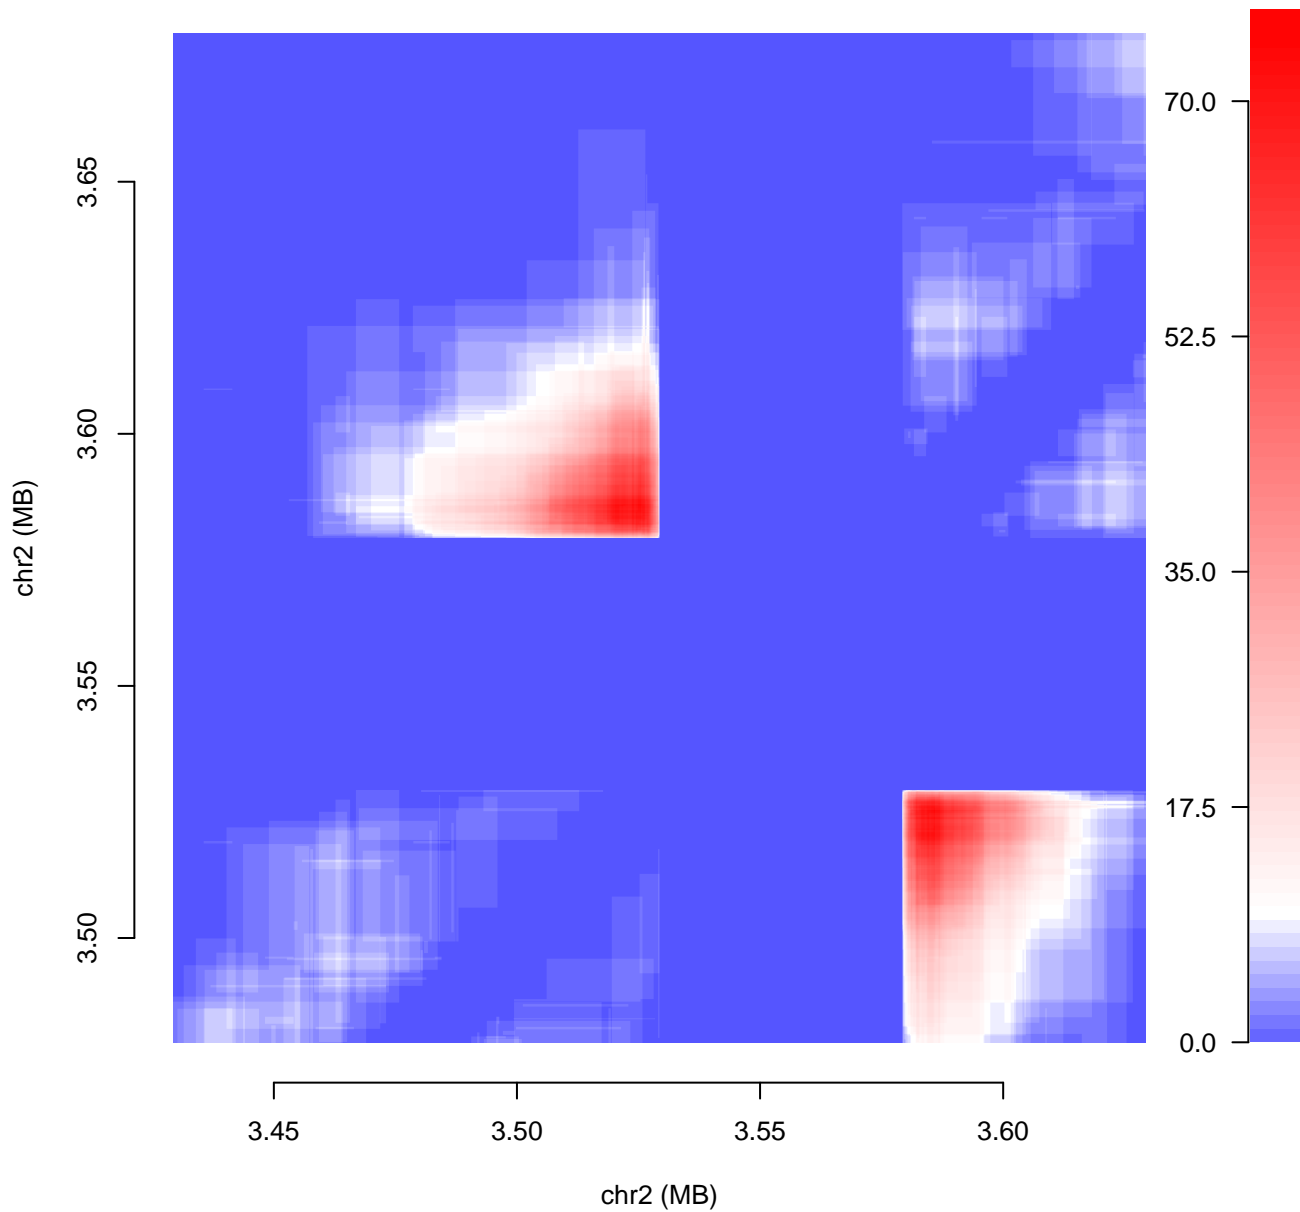

Supplement: Supplemental_Data.zip [file event_453.pdf › event_453.pdf]

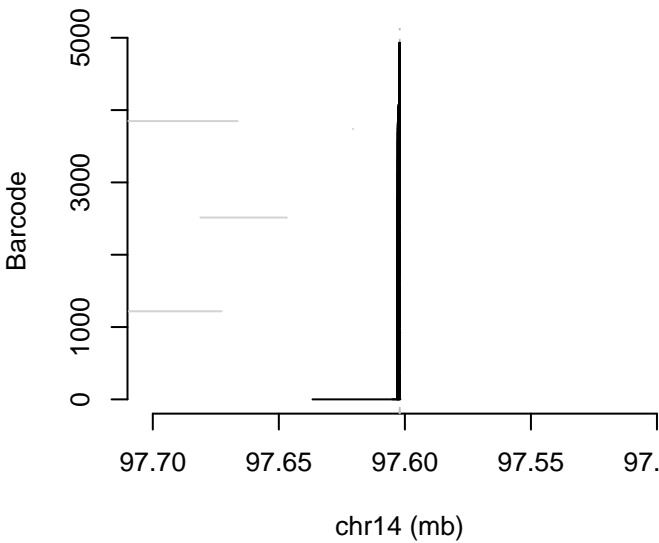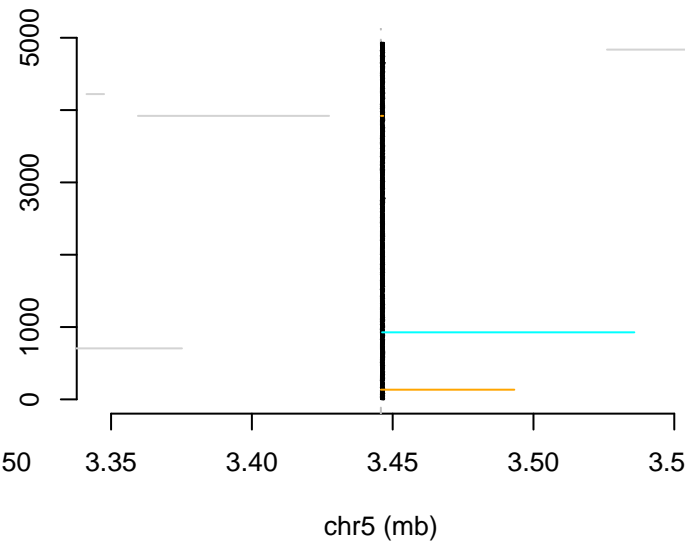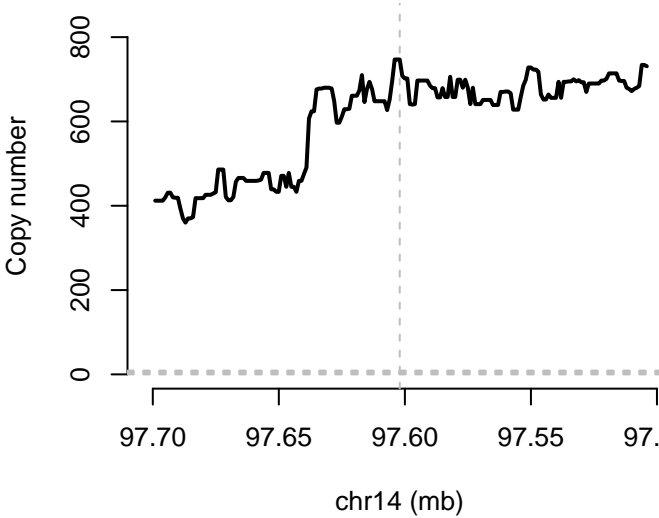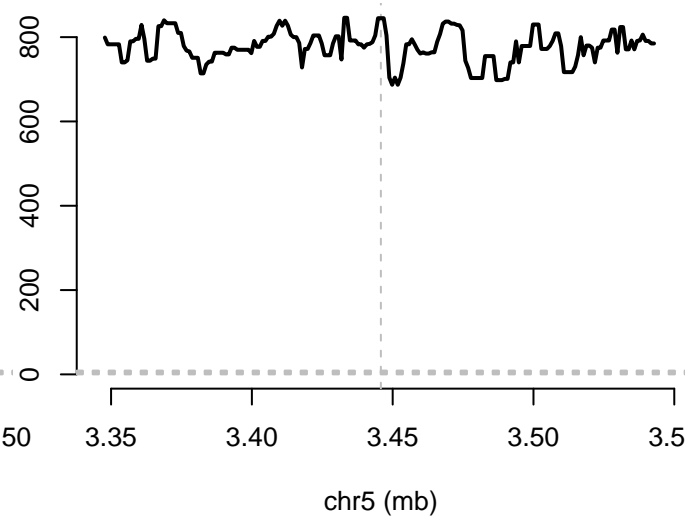

K562 chr5:3,445,803::chr14:97,602,039--

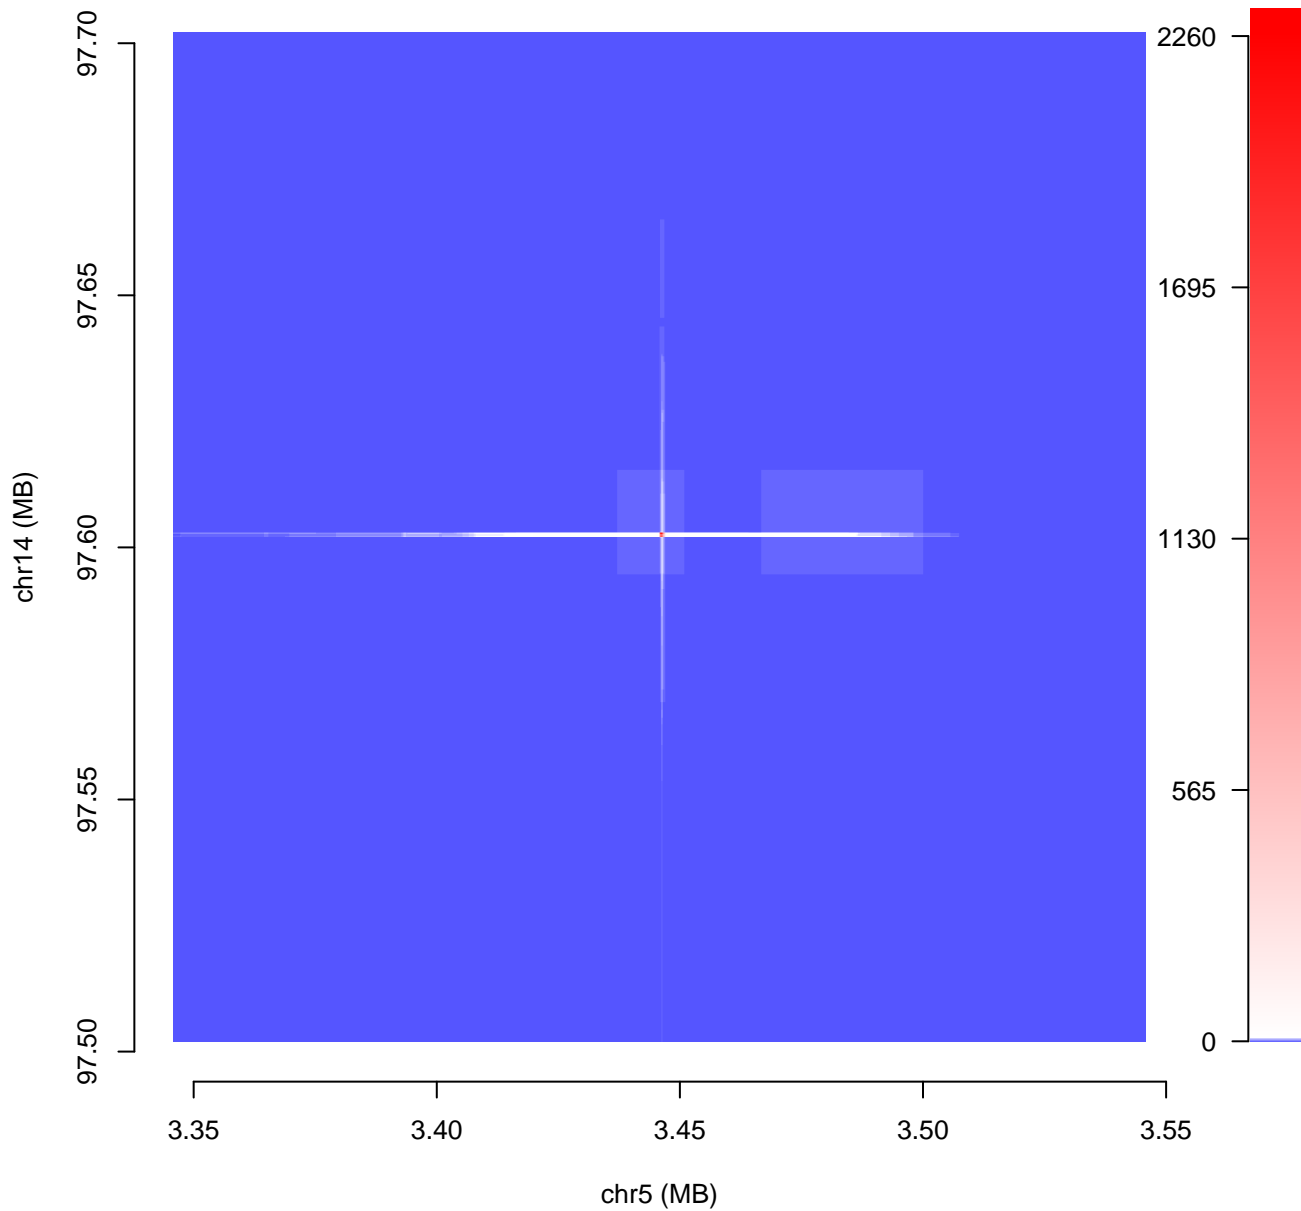

Supplement: Supplemental_Data.zip [file event_454.pdf › event_454.pdf]

Barcode

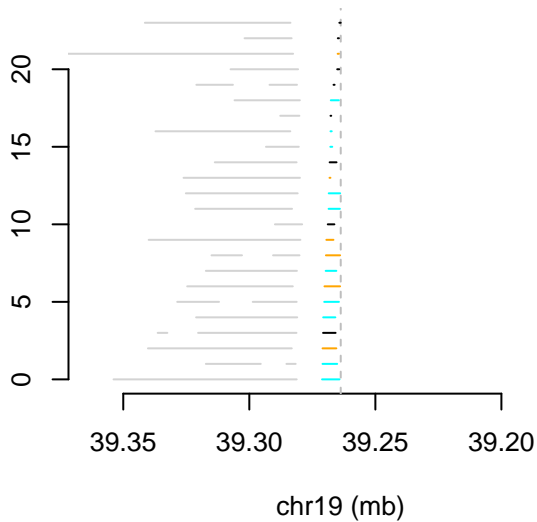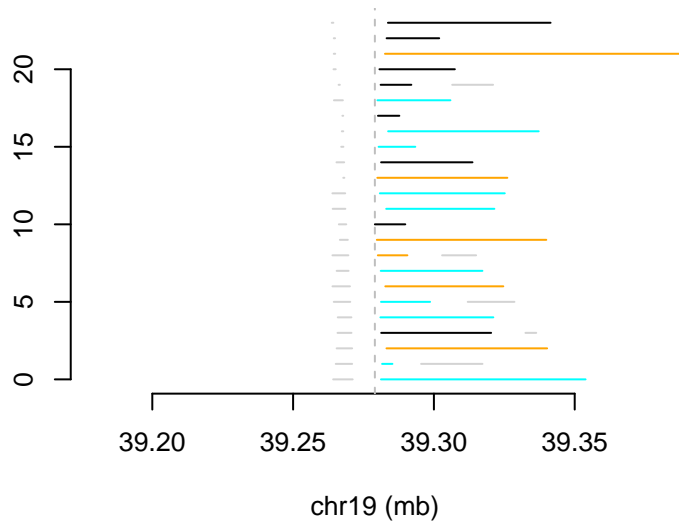

Copy number

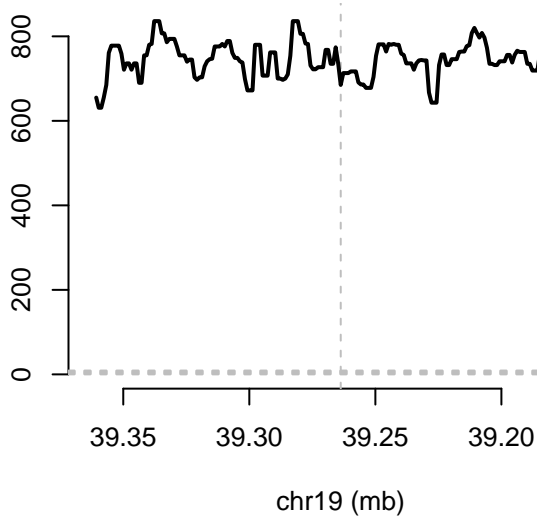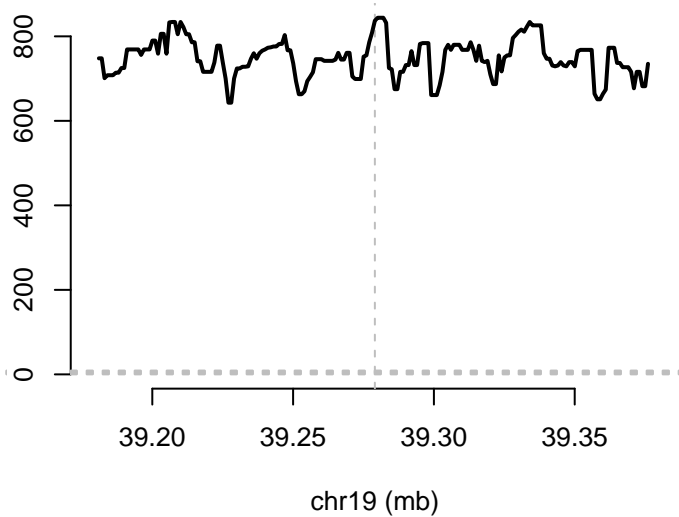

K562 chr19:39,263,732::chr19:39,279,038--

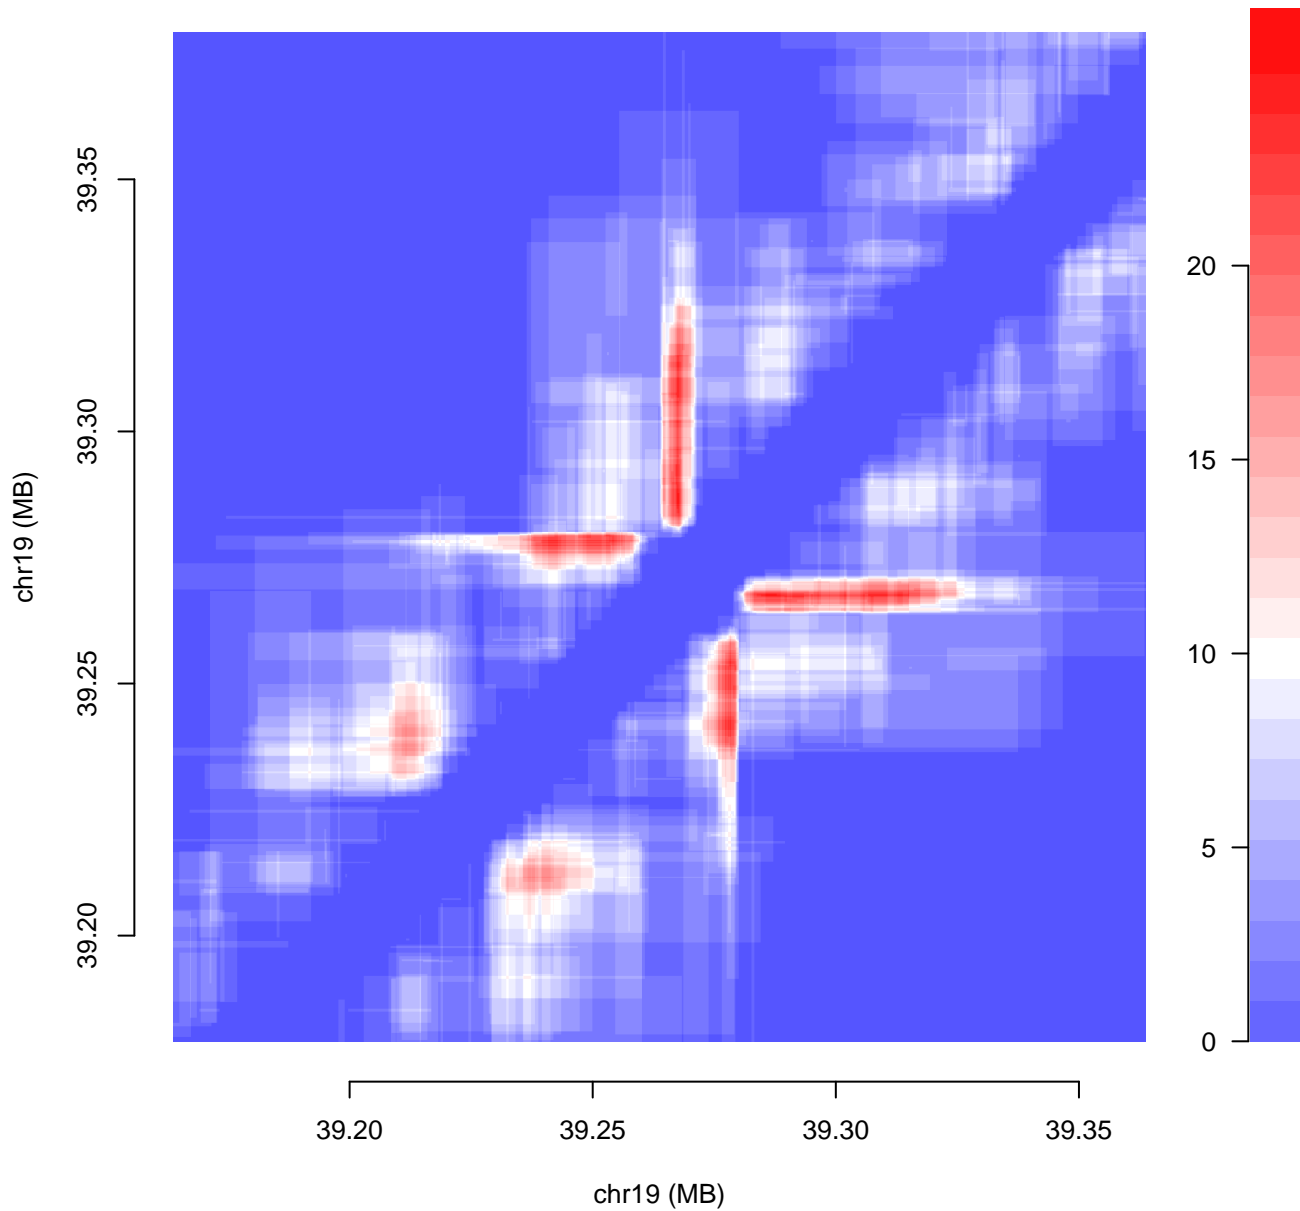

Supplement: Supplemental_Data.zip [file event_455.pdf › event_455.pdf]

Barcode

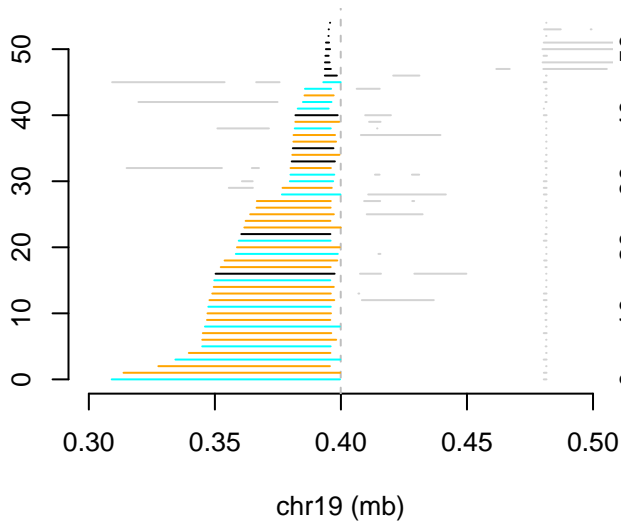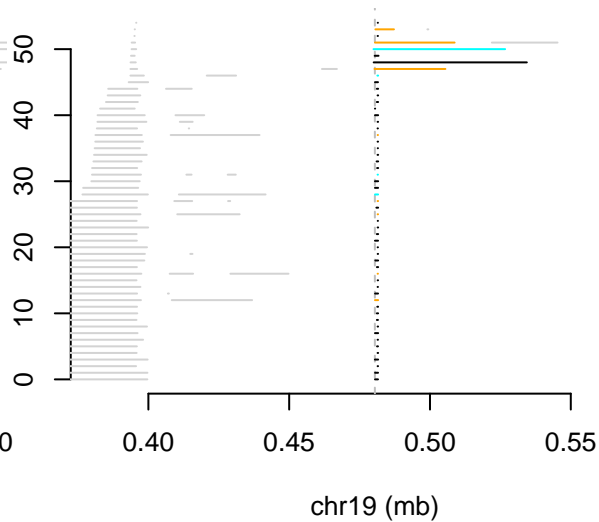

Copy number

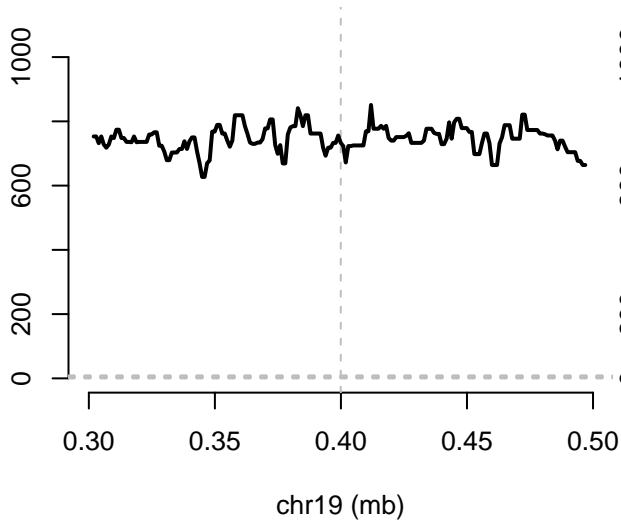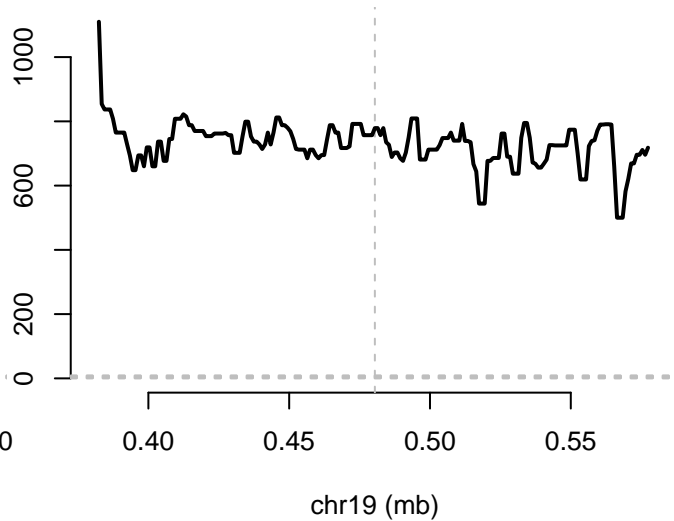

K562 chr19:399,928::chr19:480,431+-

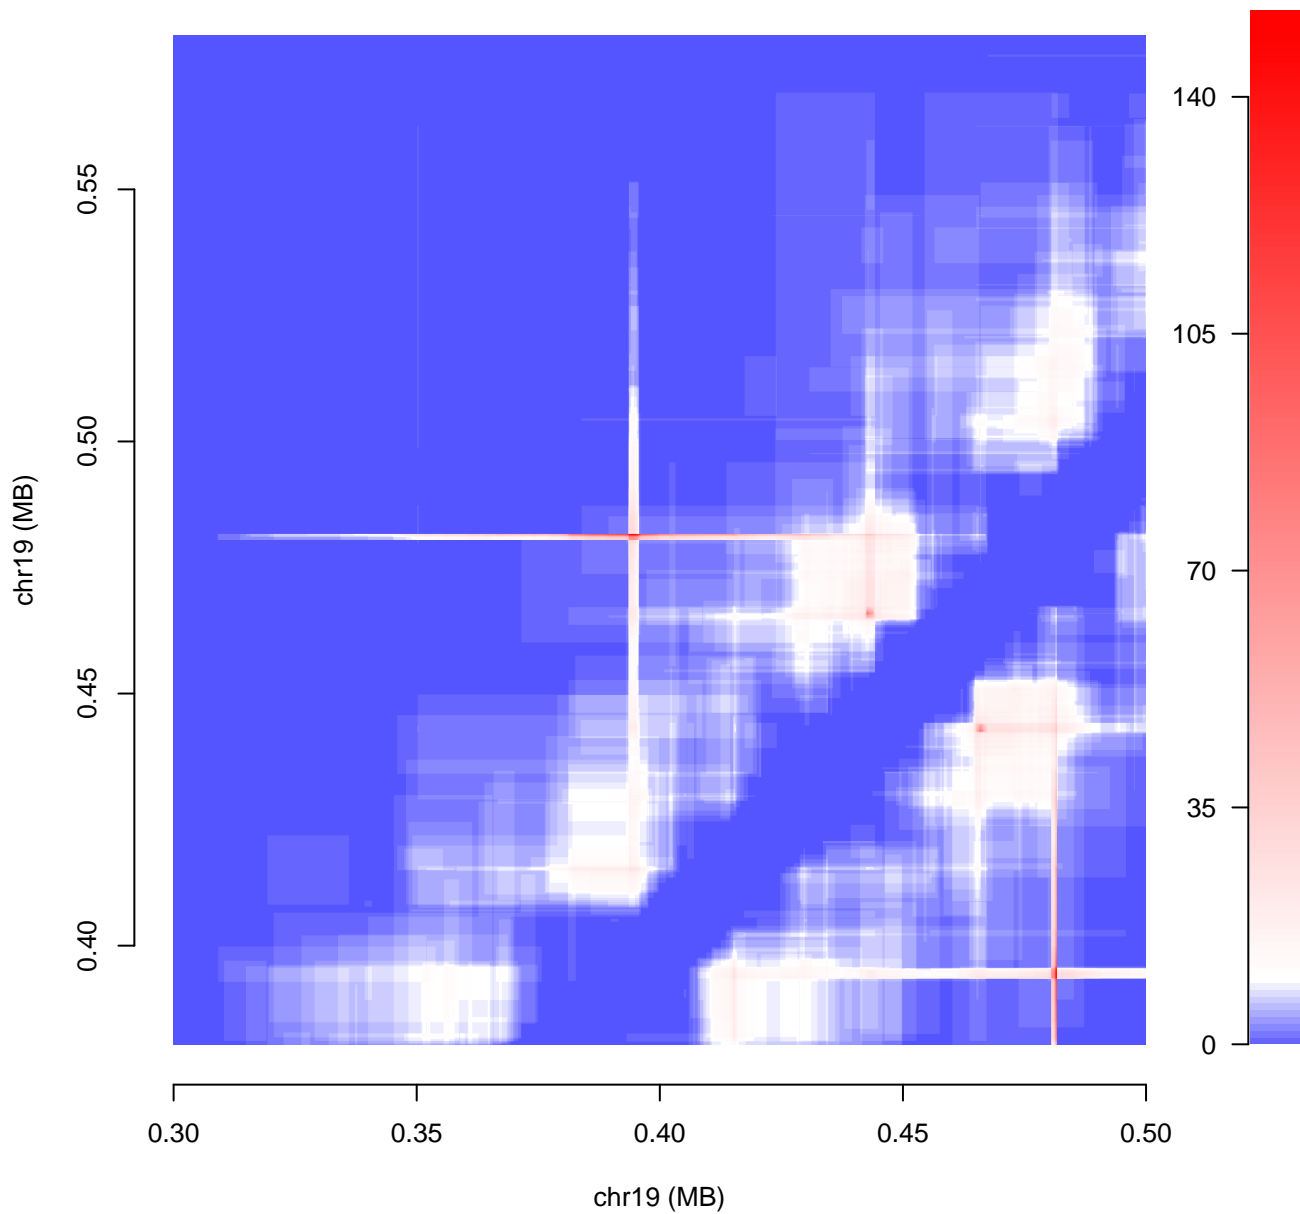

Supplement: Supplemental_Data.zip [file event_456.pdf › event_456.pdf]

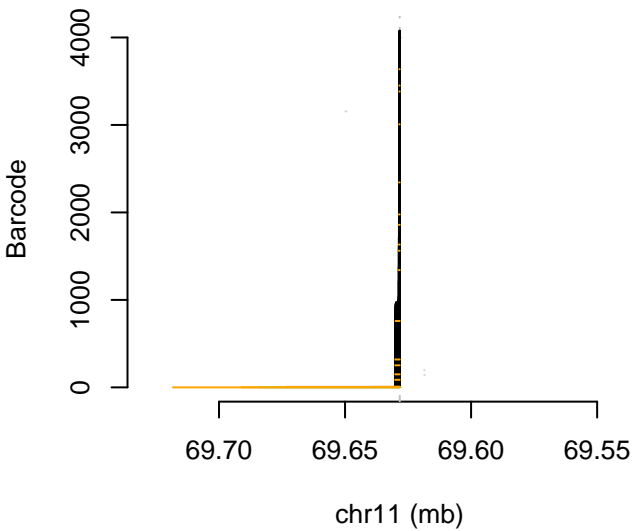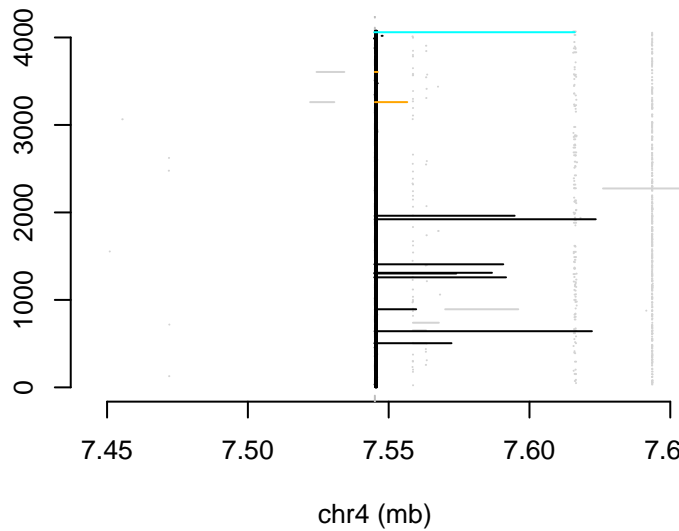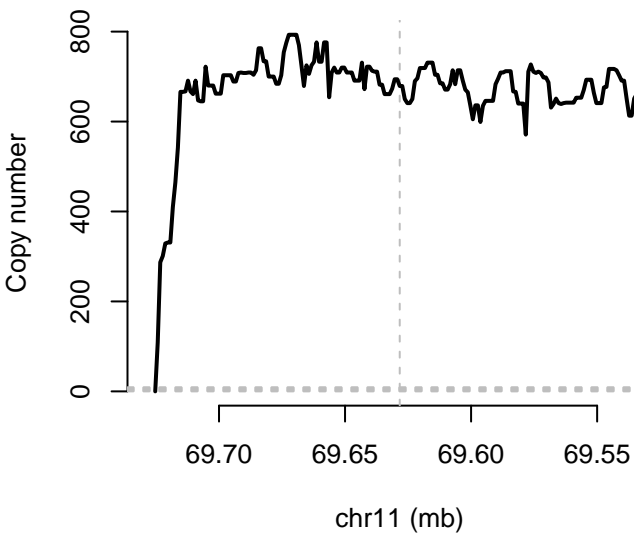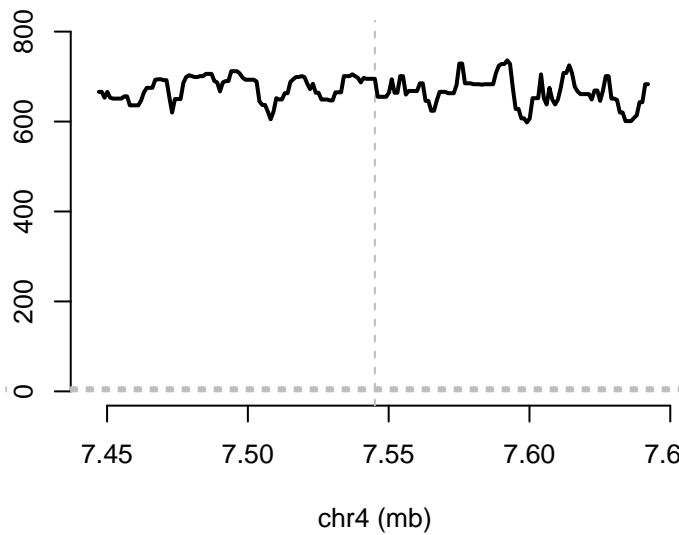

K562 chr4:7,545,100::chr11:69,628,303--

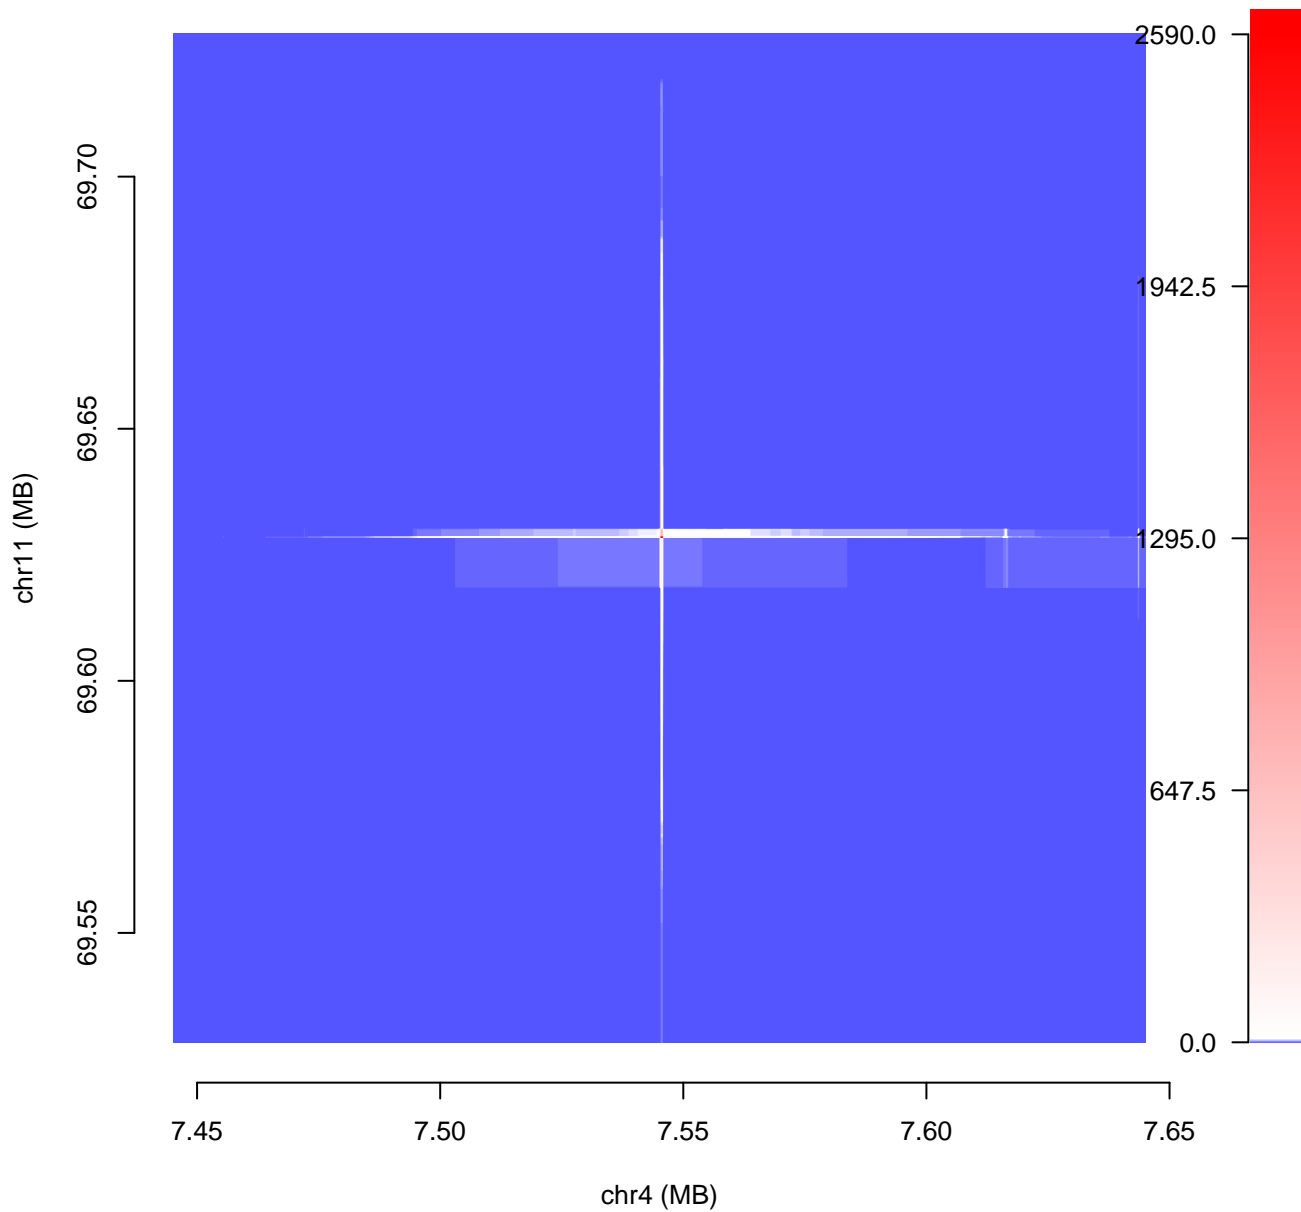

Supplement: Supplemental_Data.zip [file event_457.pdf › event_457.pdf]

Barcode

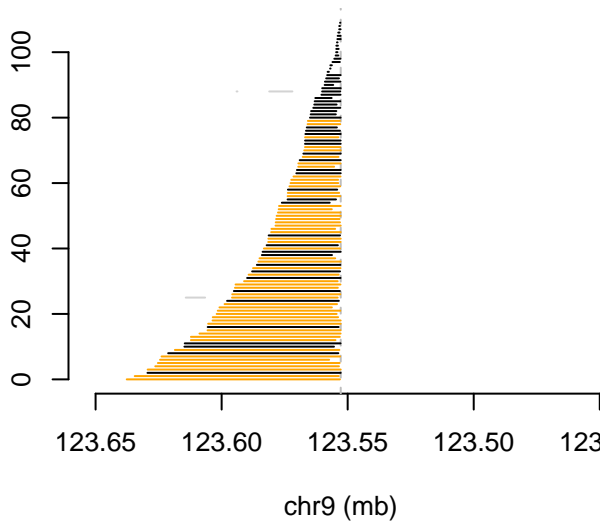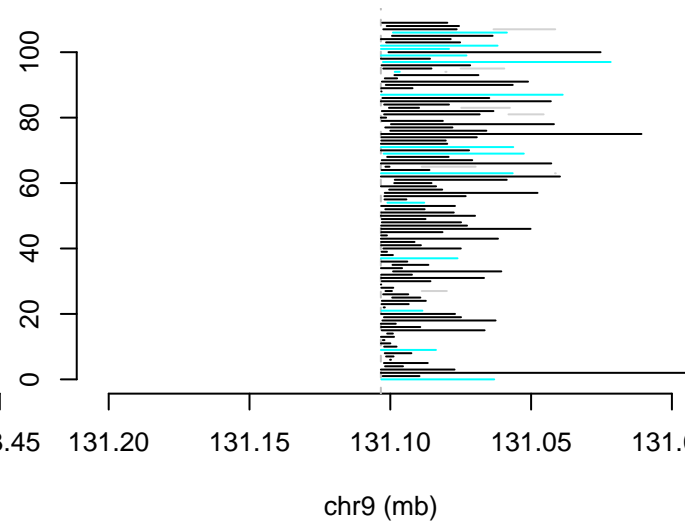

Copy number

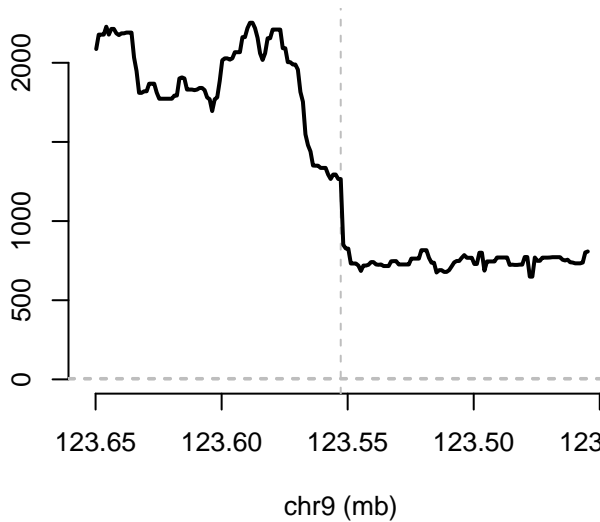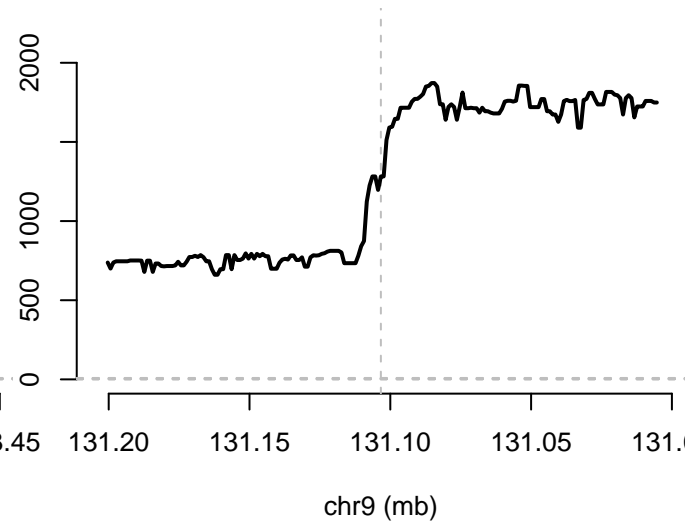

K562 chr9:123,552,749::chr9:131,103,351-+

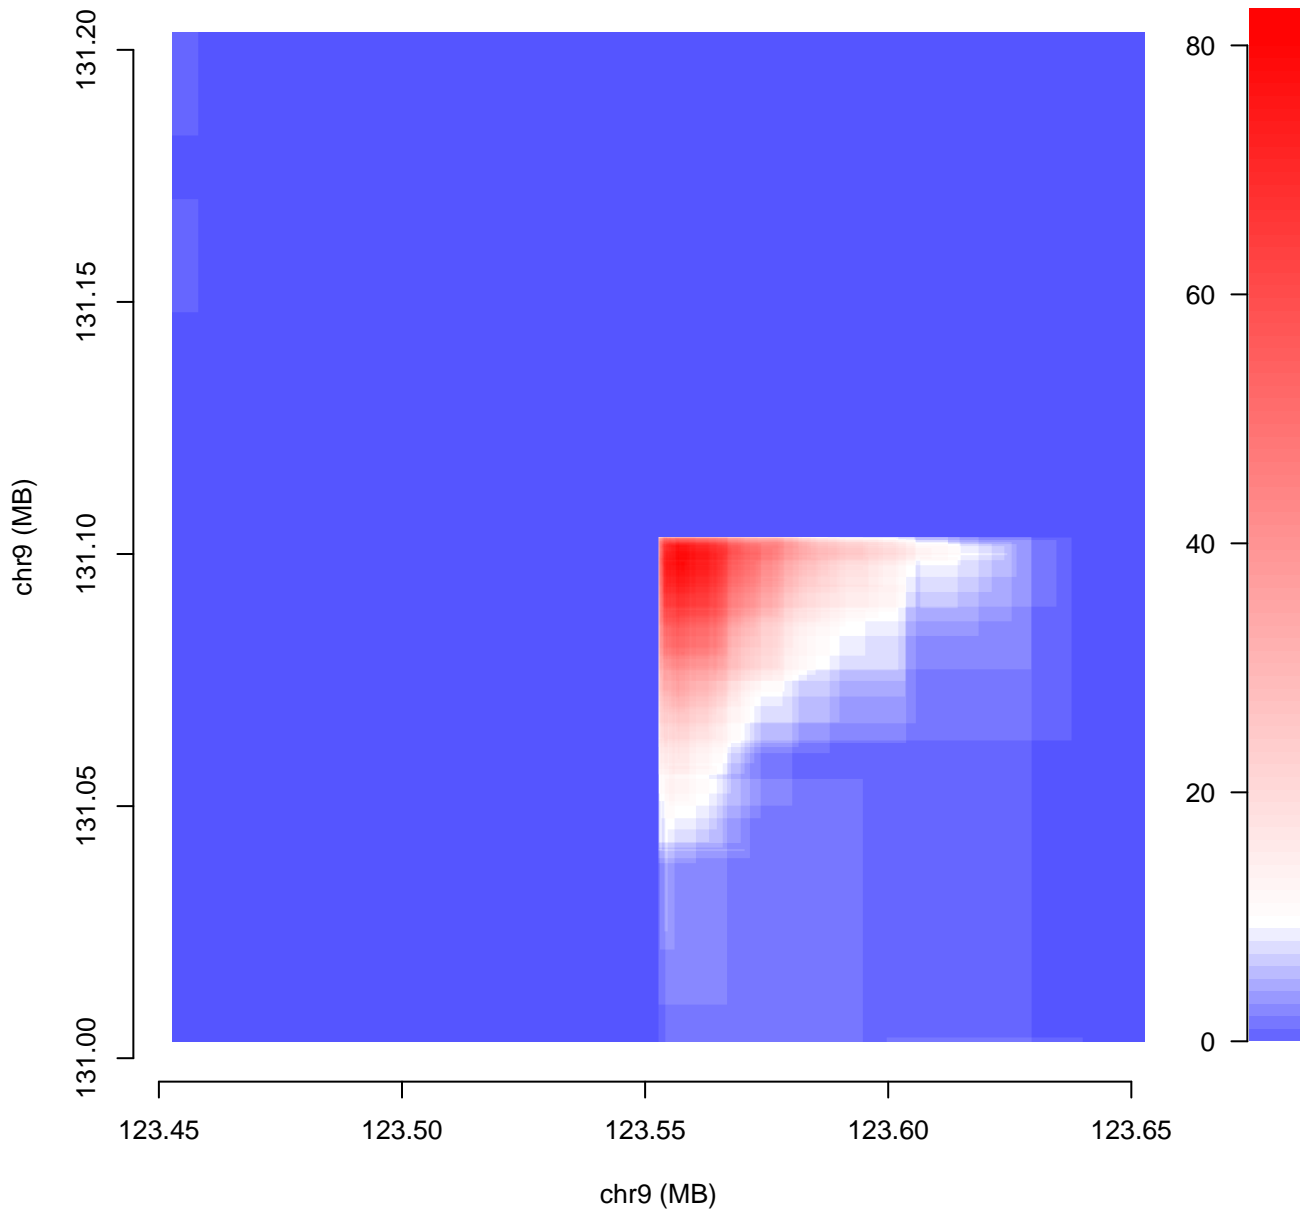

Supplement: Supplemental_Data.zip [file event_458.pdf › event_458.pdf]

Barcode

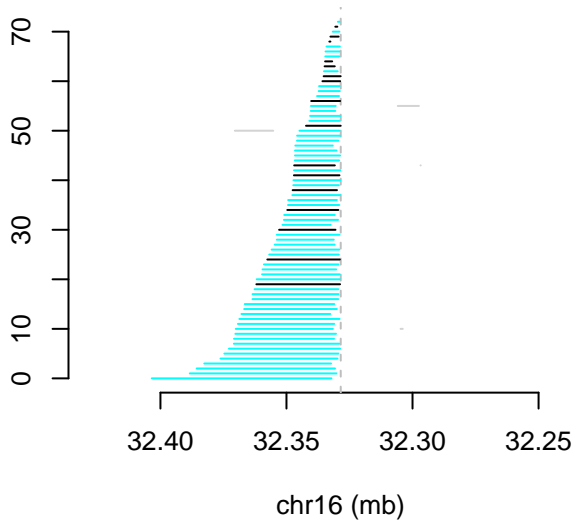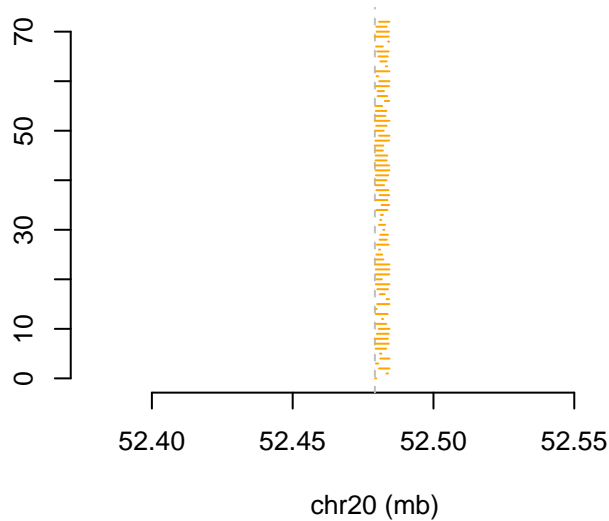

Copy number

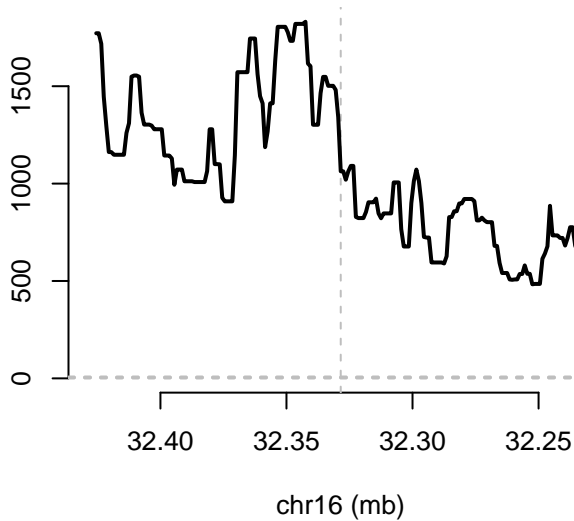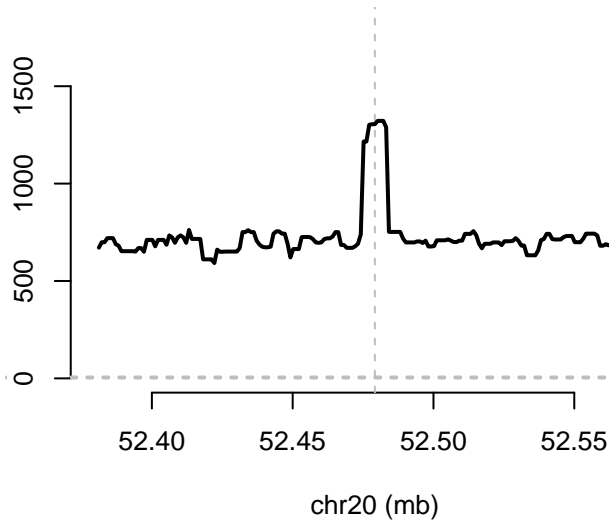

K562 chr16:32,328,472::chr20:52,479,183--

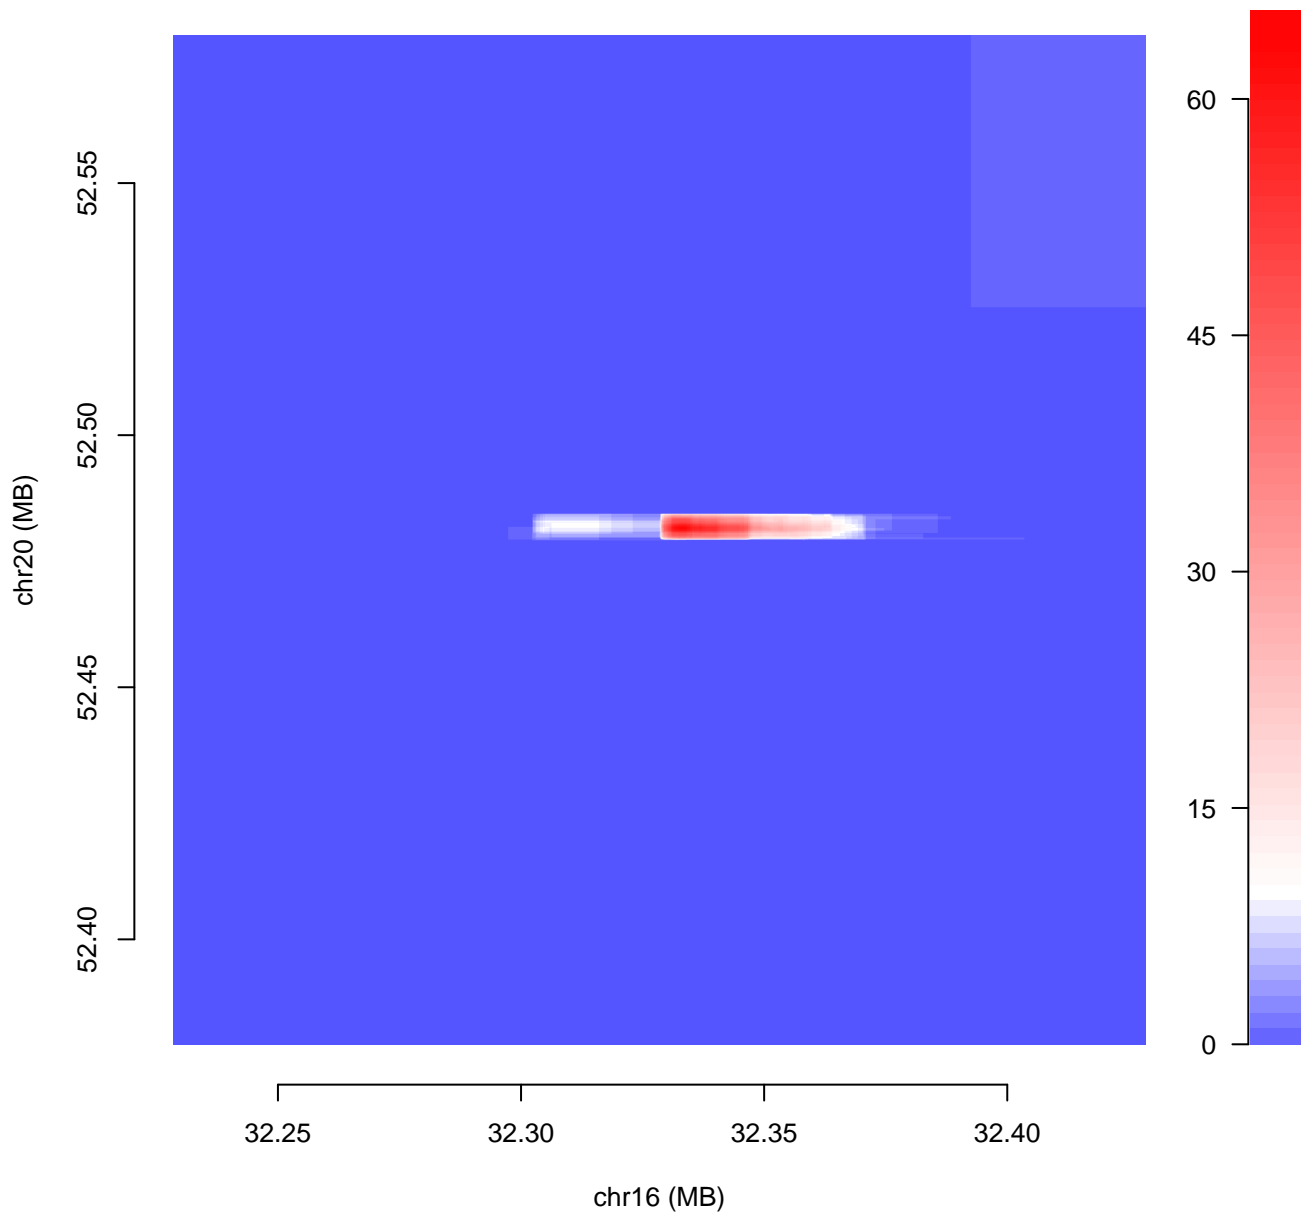

Supplement: Supplemental_Data.zip [file event_459.pdf › event_459.pdf]
