# Supplementary figures and images for: Comprehensive, integrated, and phased whole-genome analysis of the primary ENCODE cell line K562 (part 5 of 6)
Source: HighWire-hosted journal article supplement (doi:10.1101/gr.234948.118), 2019-02-08

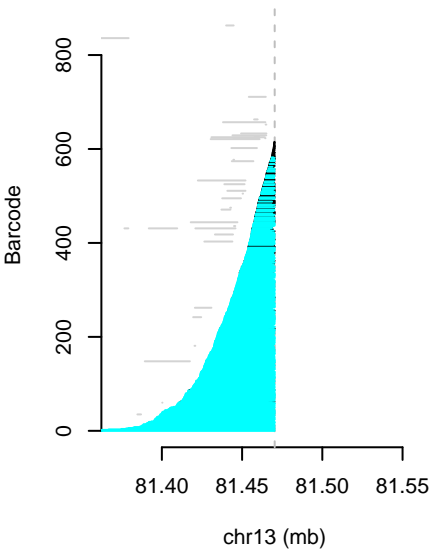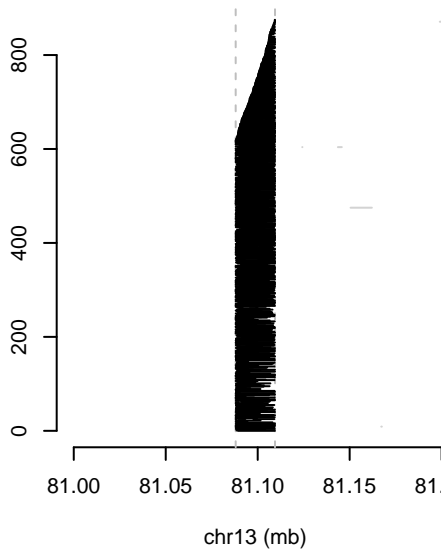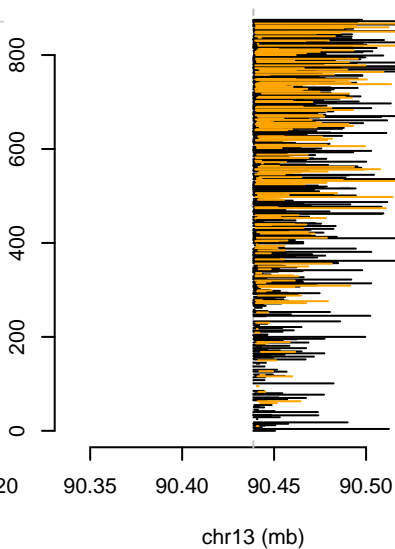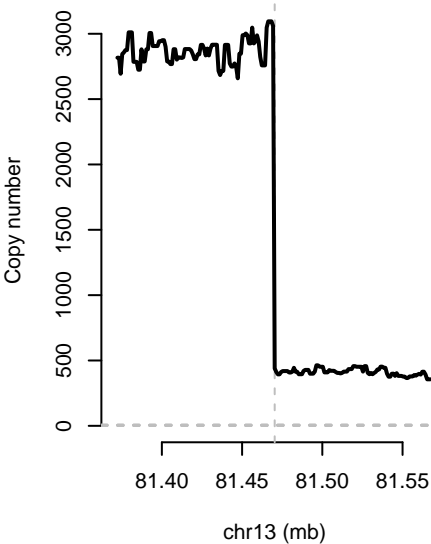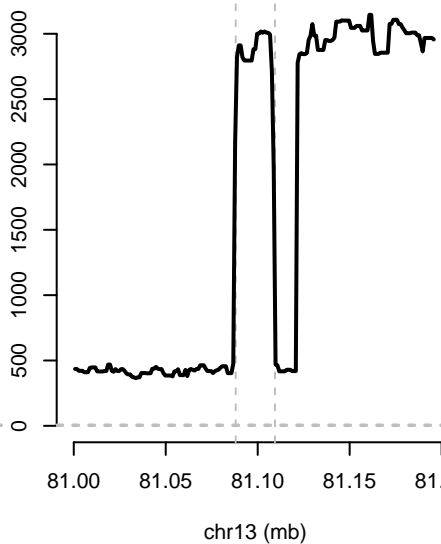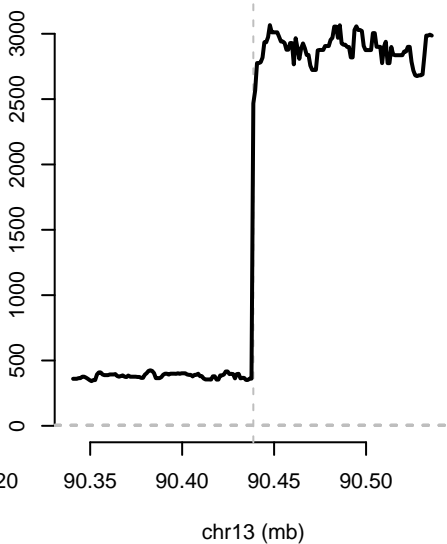

K562 chr13:81,088,030::chr13:81,109,414-+

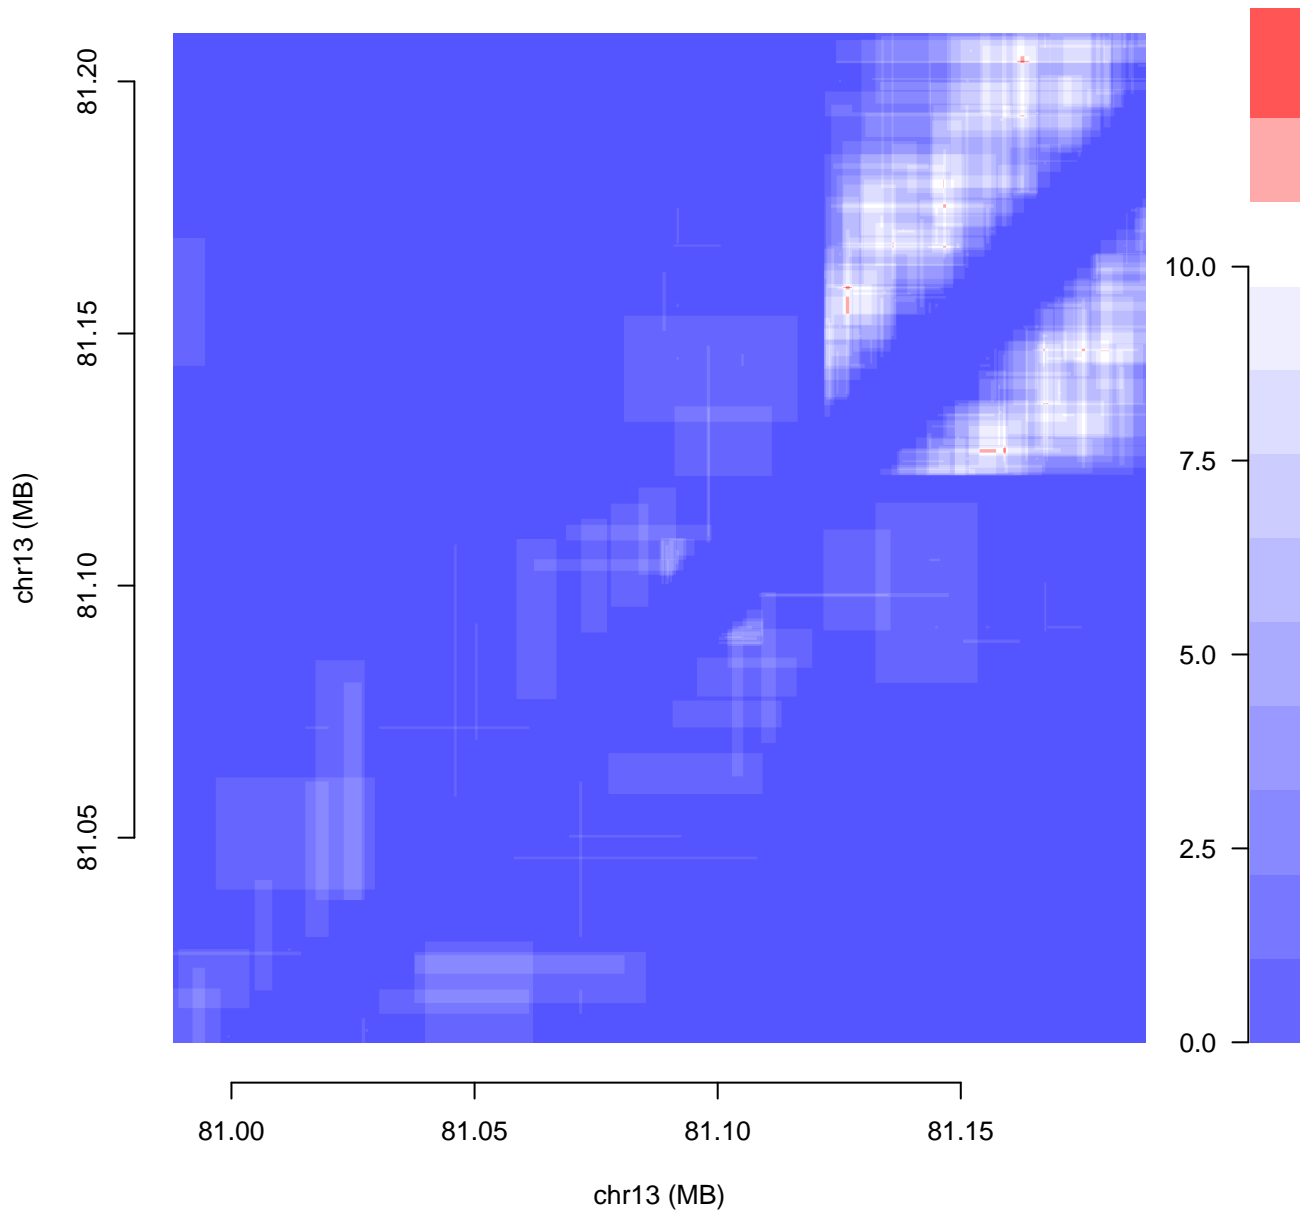

K562 chr13:81,088,030::chr13:81,470,311-+

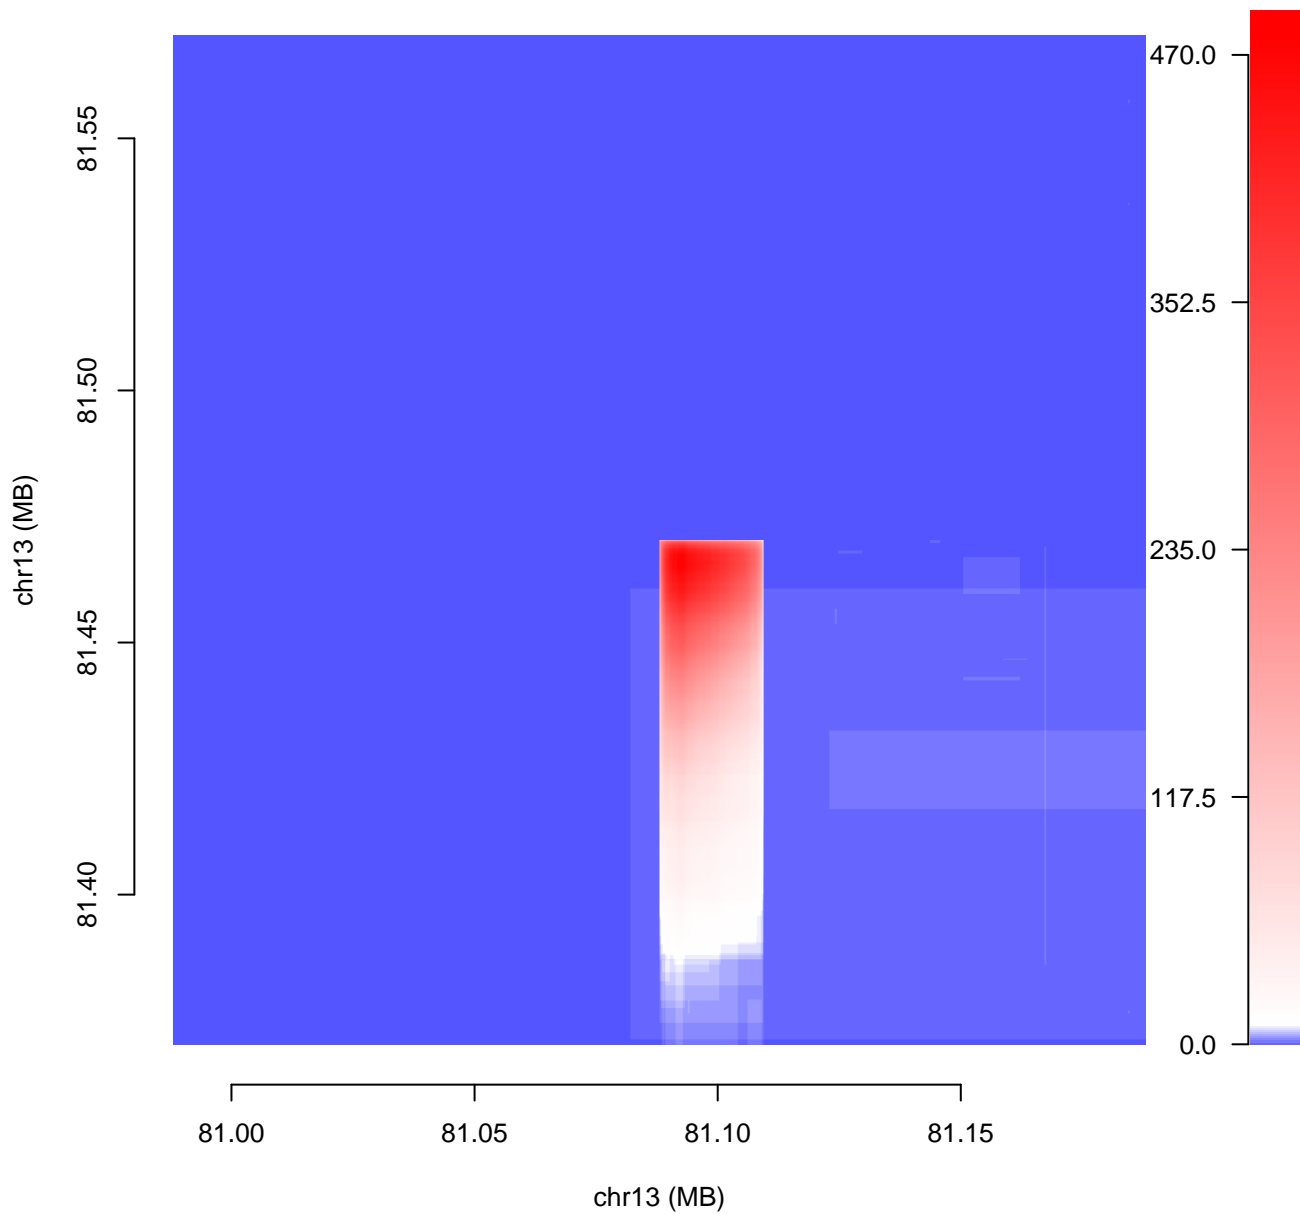

K562 chr13:81,109,414::chr13:90,438,706+-

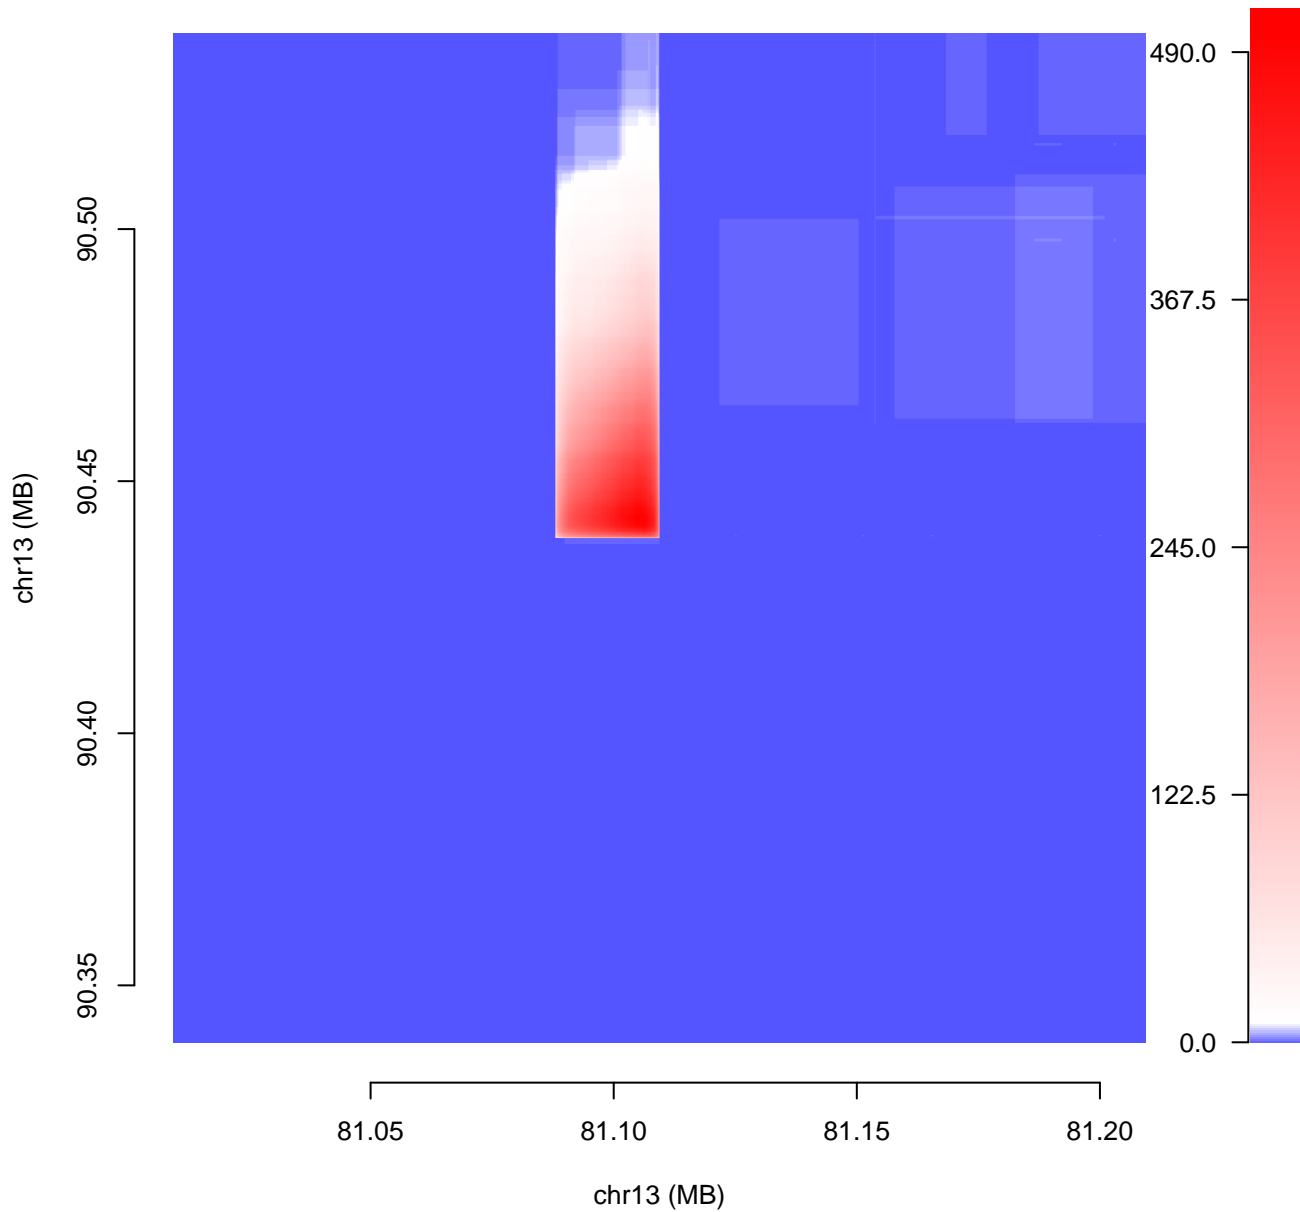

Supplement: Supplemental_Data.zip [file event_46.pdf › event_46.pdf]

Barcode

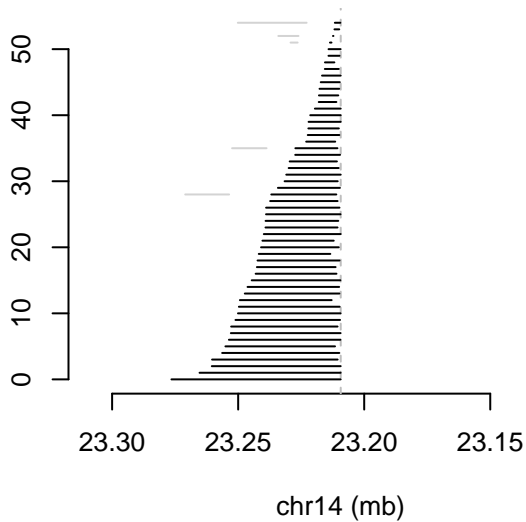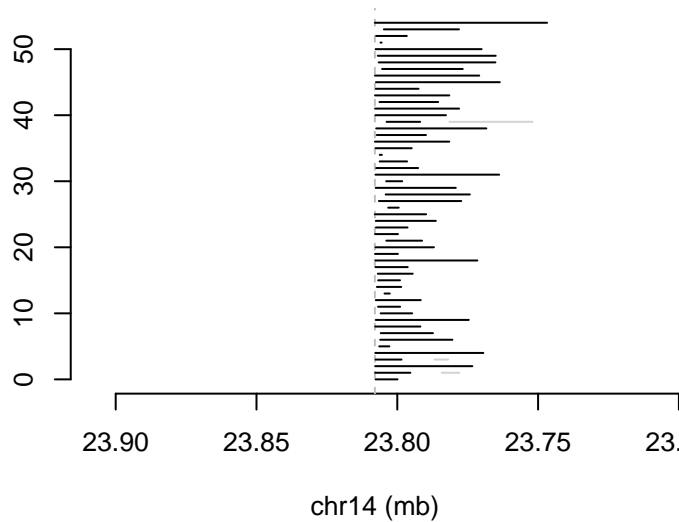

Copy number

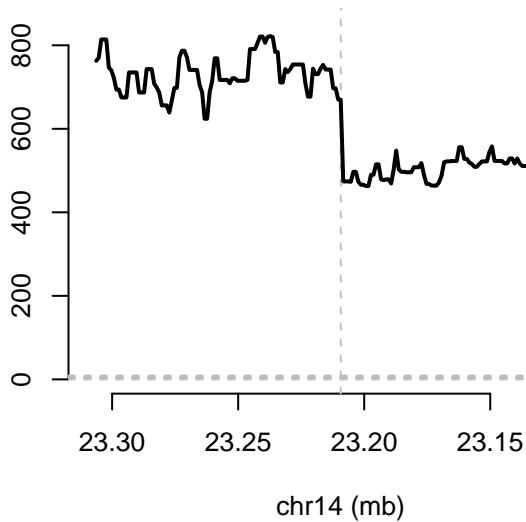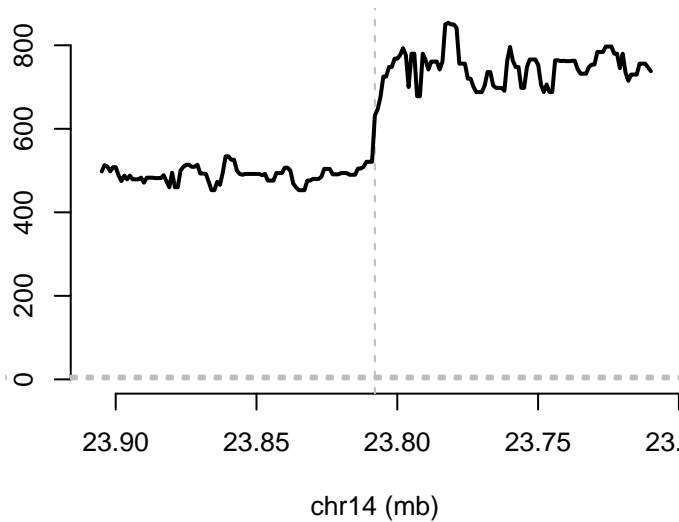

K562 chr14:23,807,958::chr14:23,209,309+-

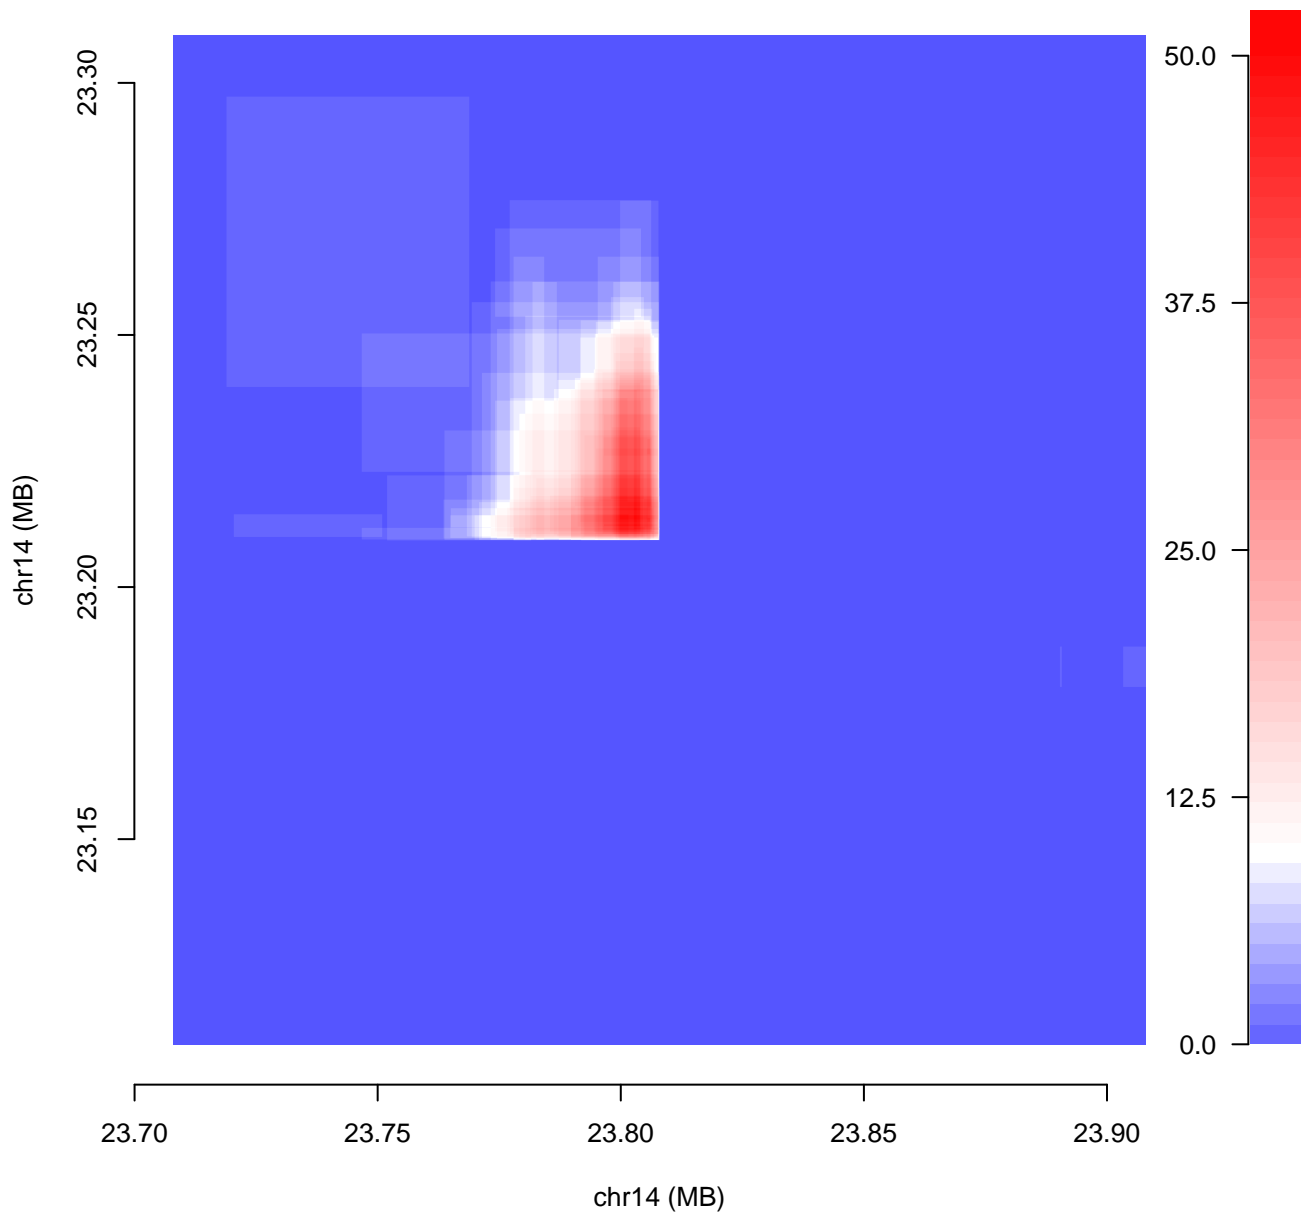

Supplement: Supplemental_Data.zip [file event_460.pdf › event_460.pdf]

Barcode

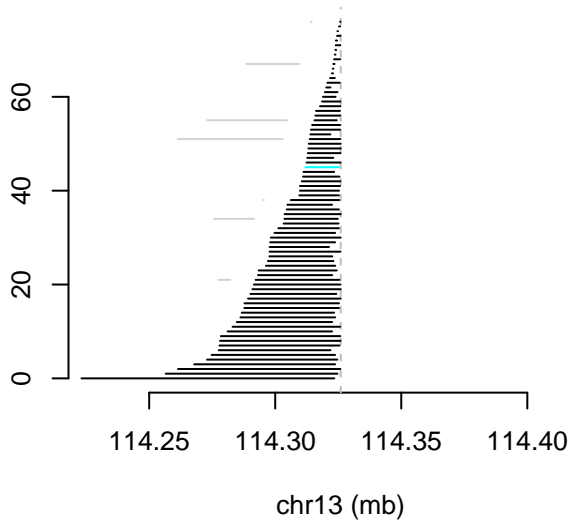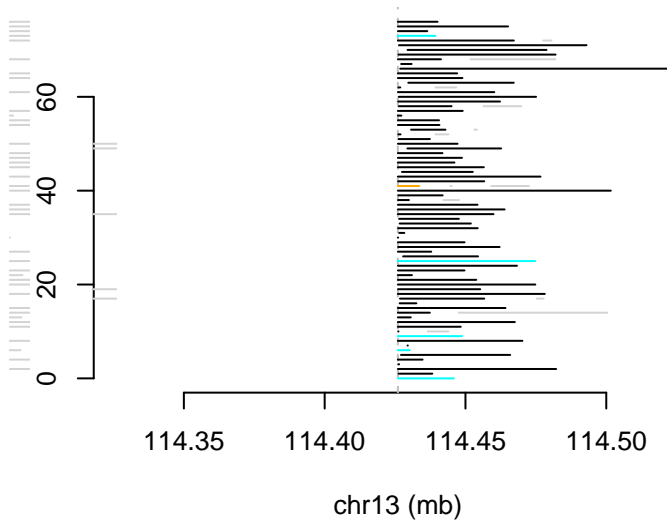

Copy number

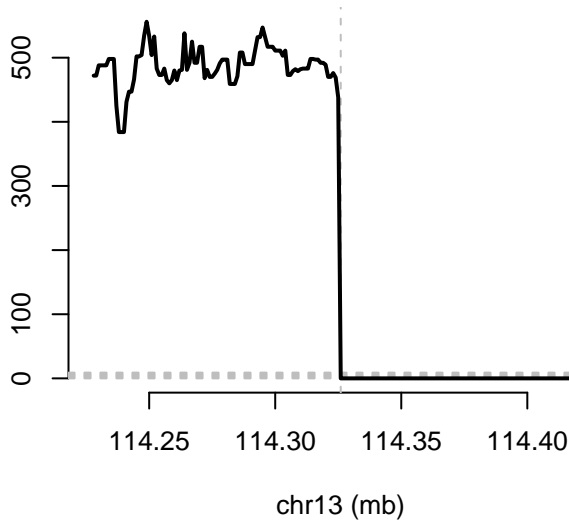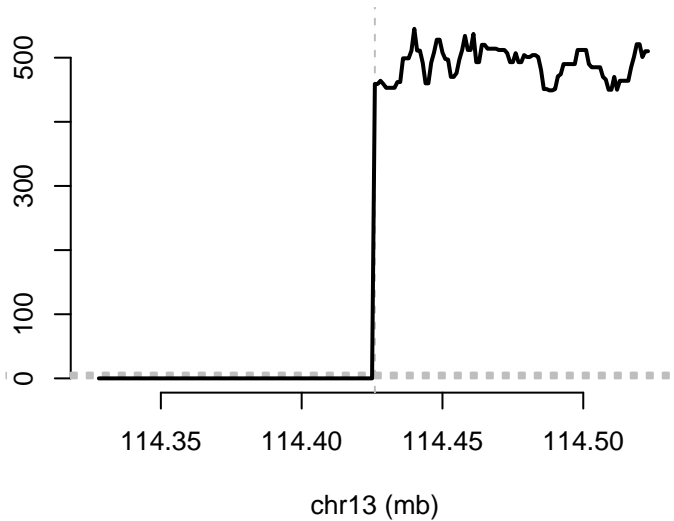

K562 chr13:114,325,993::chr13:114,425,992+-

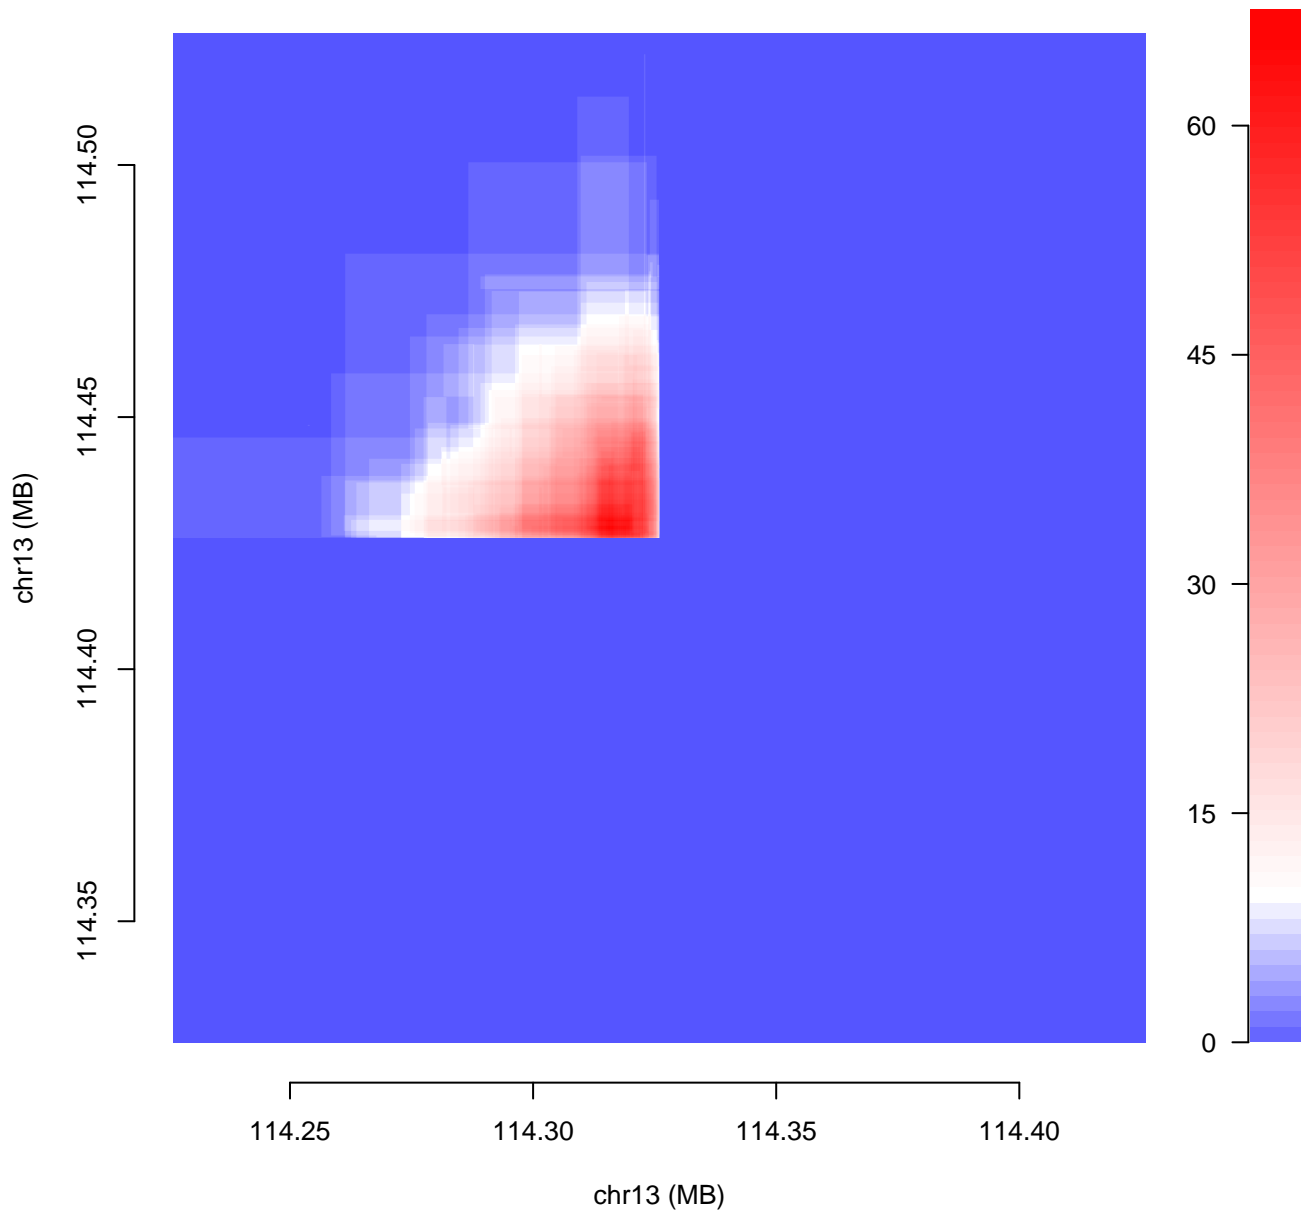

Supplement: Supplemental_Data.zip [file event_461.pdf › event_461.pdf]

Barcode

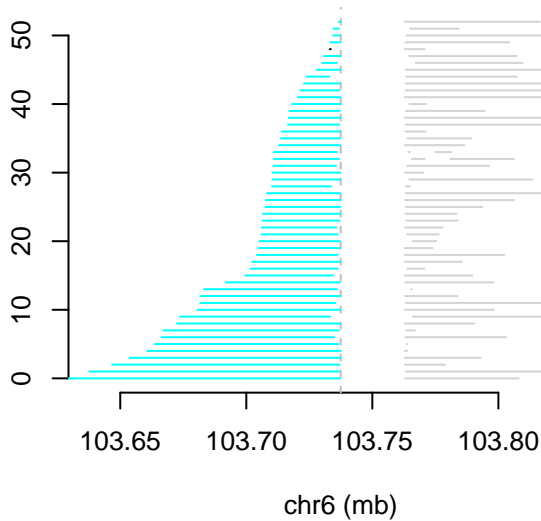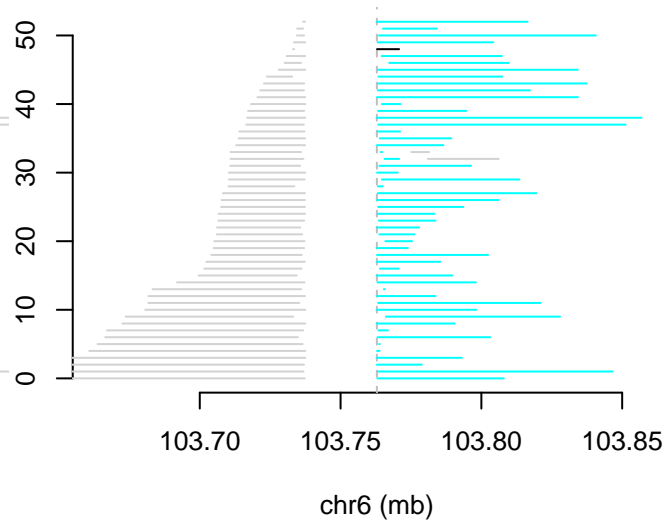

Copy number

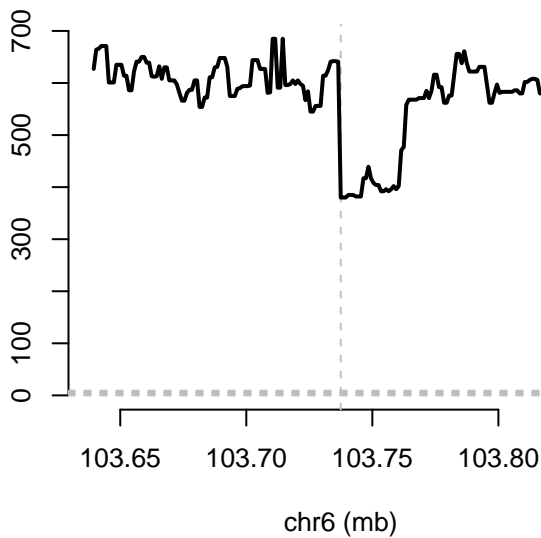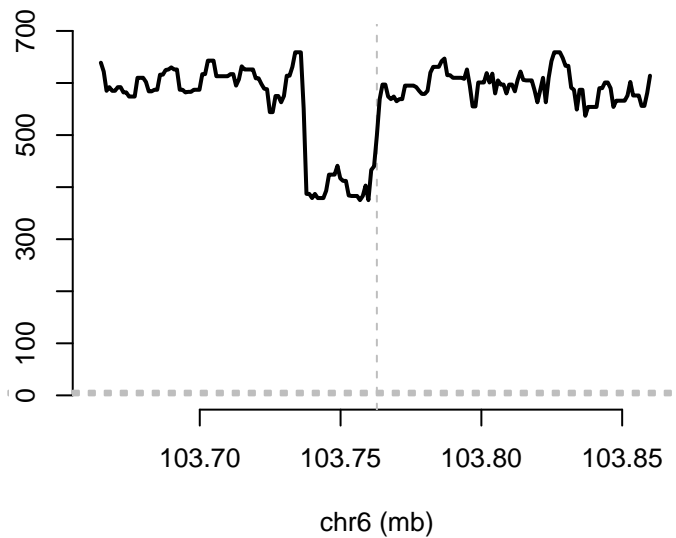

K562 chr6:103,737,464::chr6:103,762,889+-

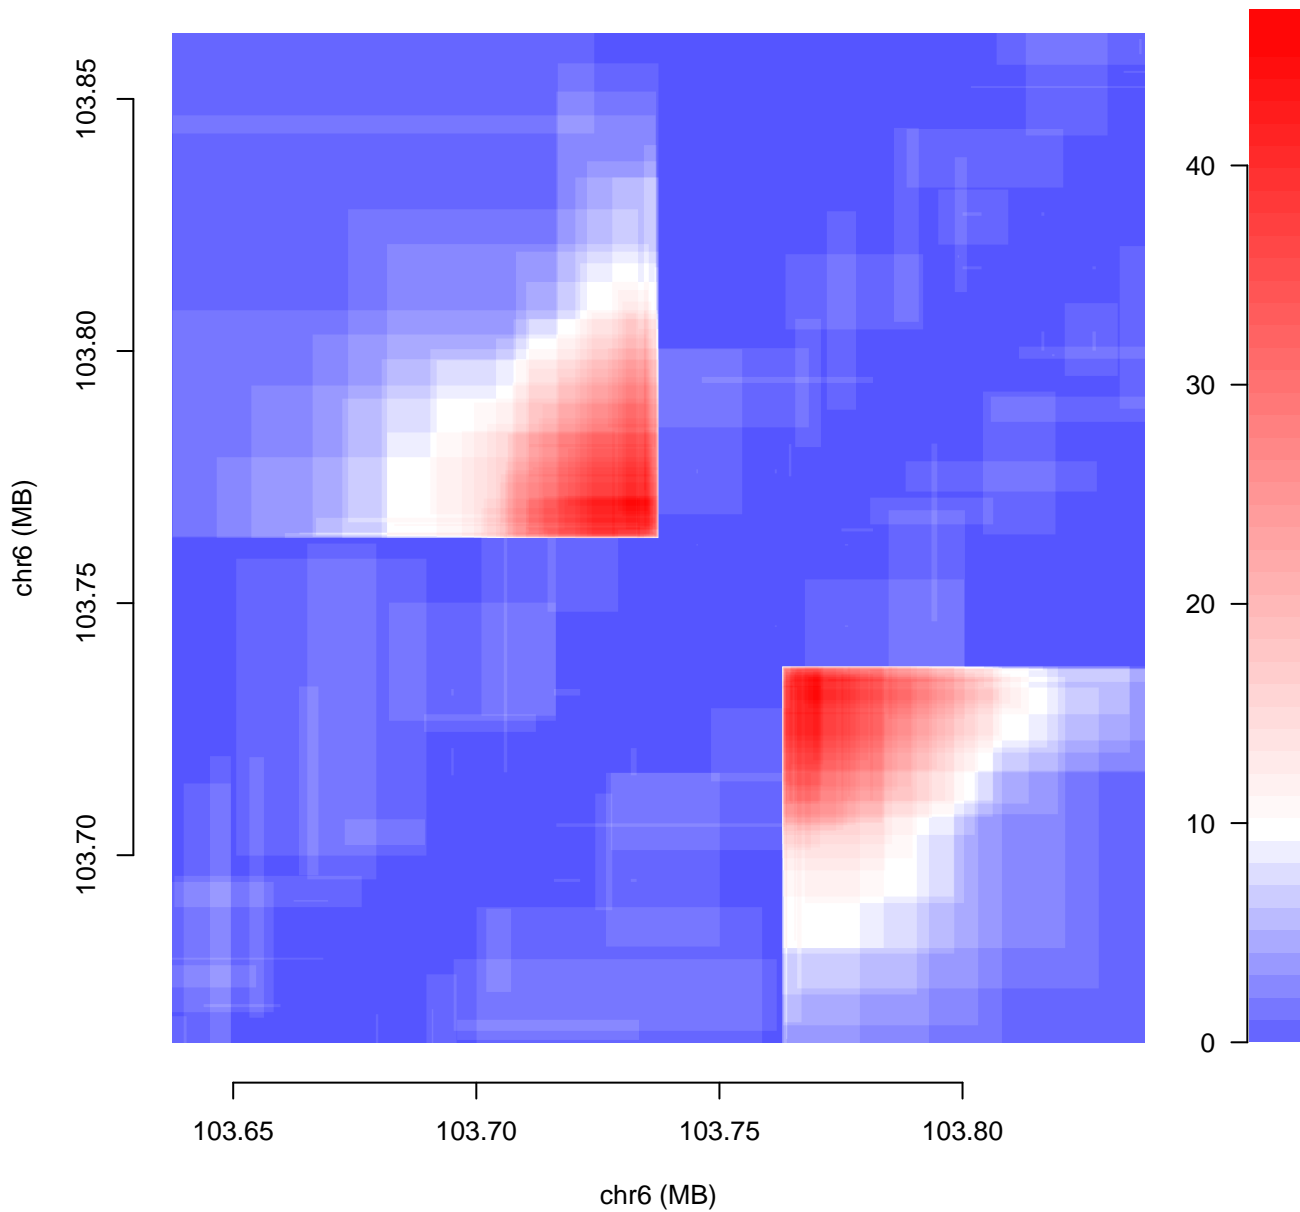

Supplement: Supplemental_Data.zip [file event_462.pdf › event_462.pdf]

Barcode

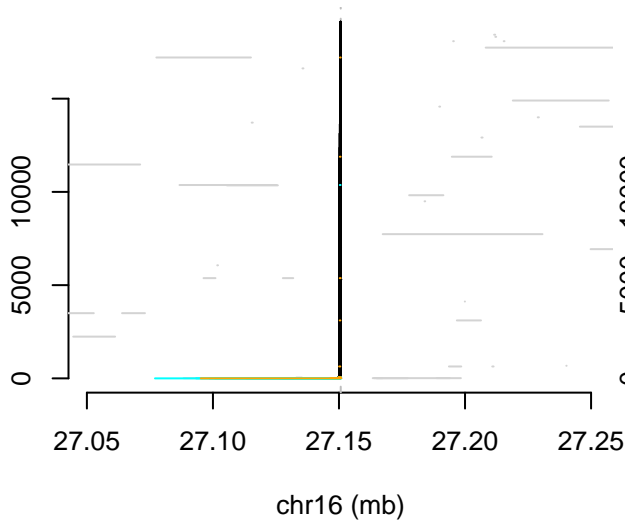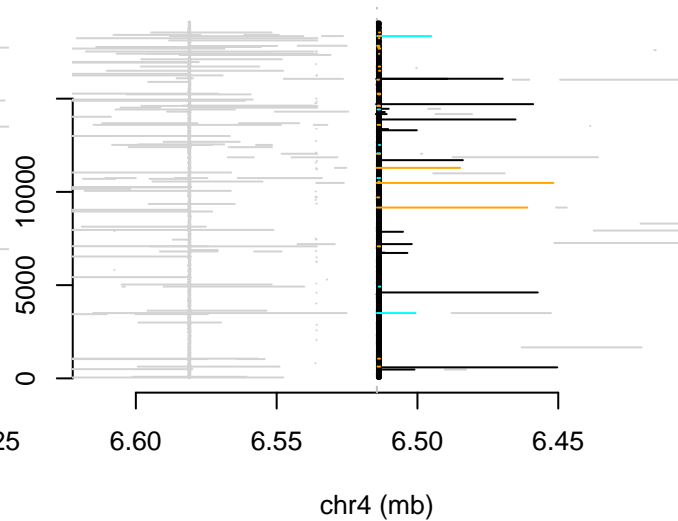

Copy number

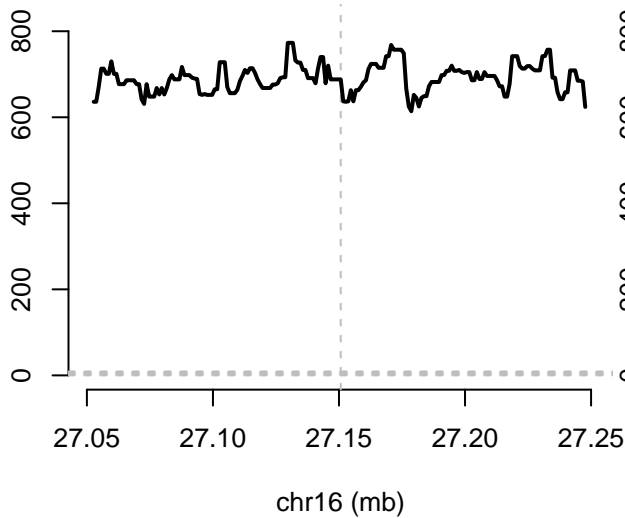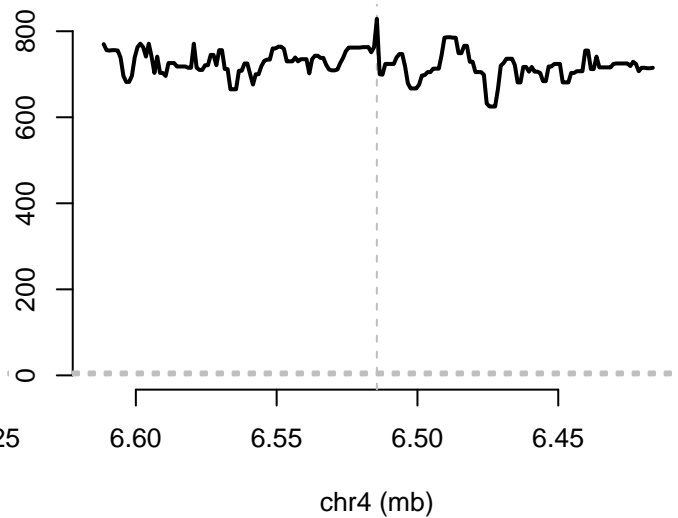

# K562 chr16:27,150,699::chr4:6,514,409++

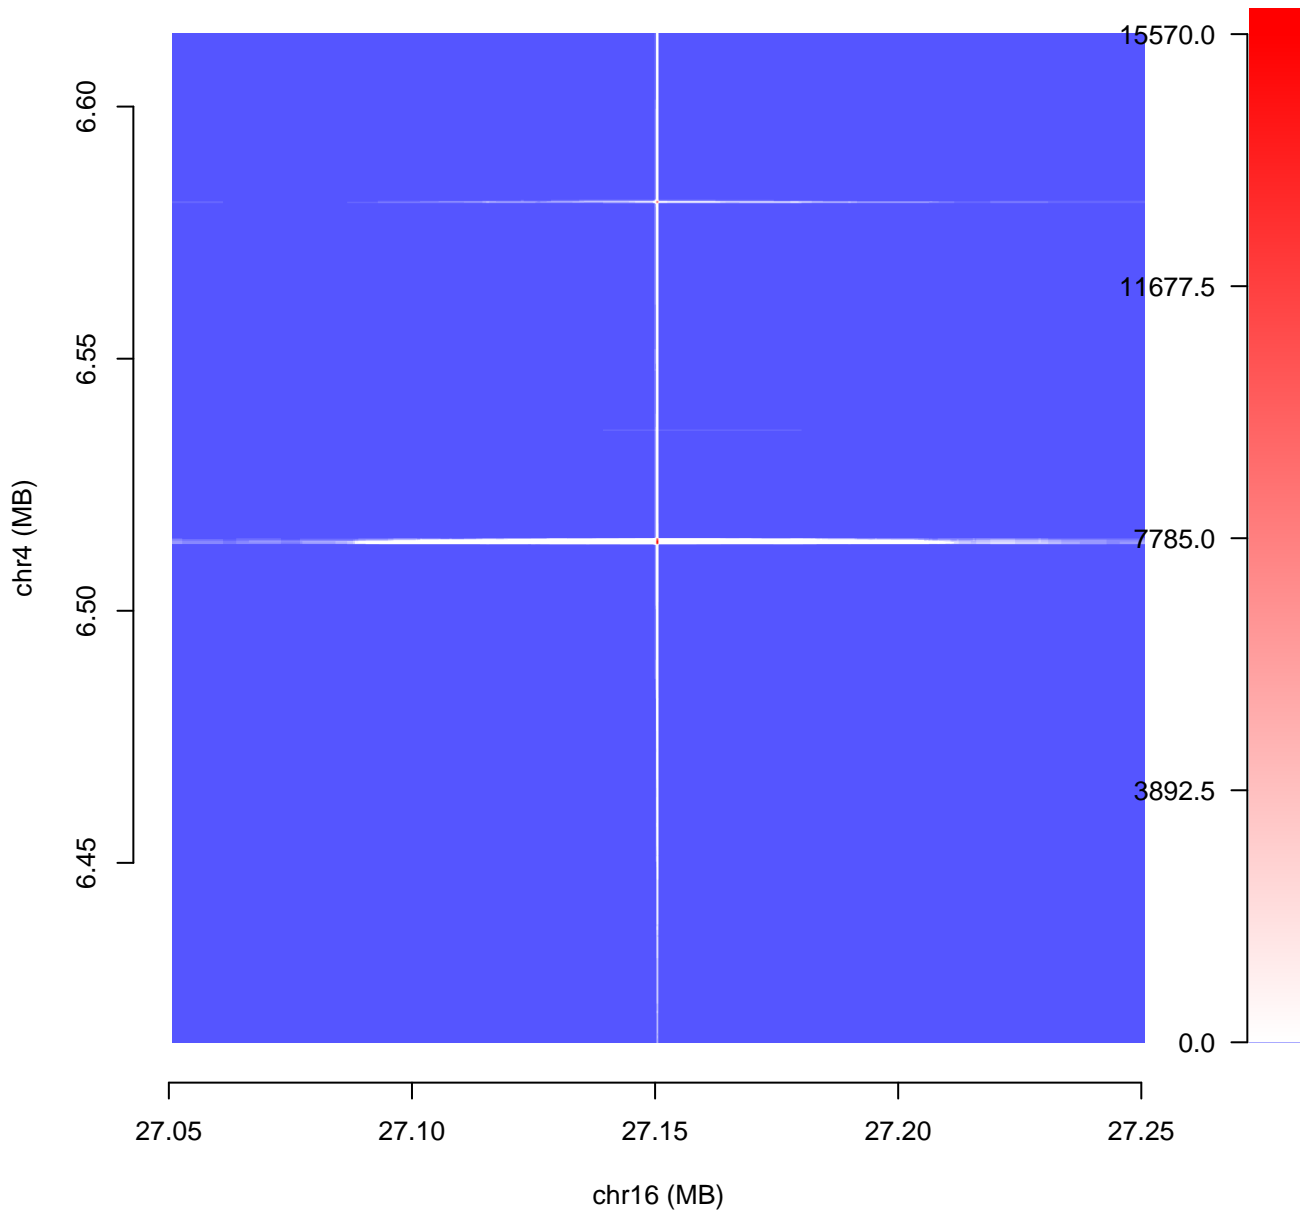

Supplement: Supplemental_Data.zip [file event_463.pdf › event_463.pdf]

Barcode

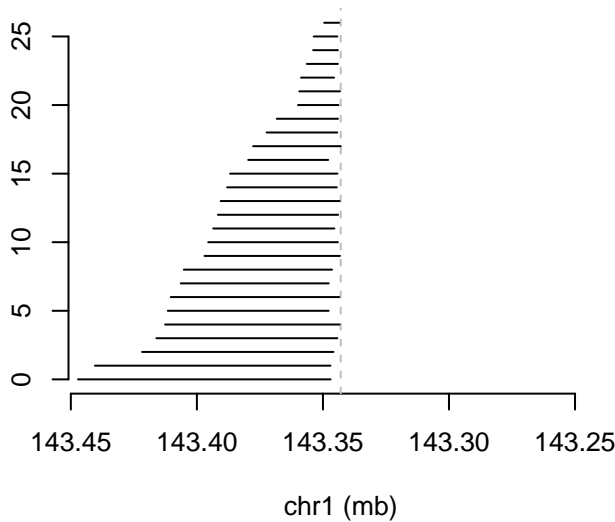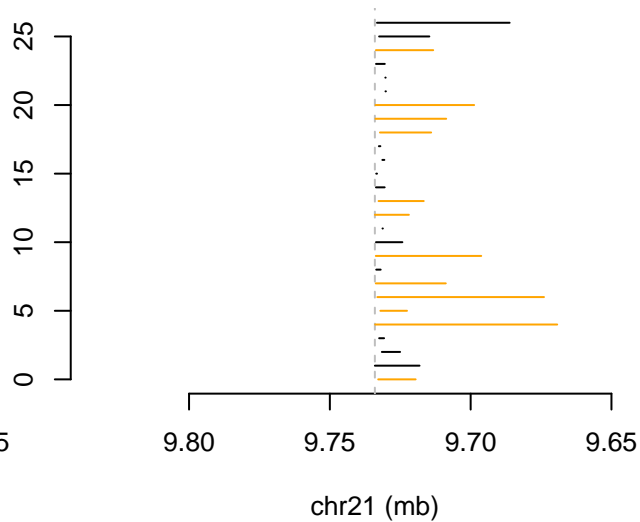

Copy number

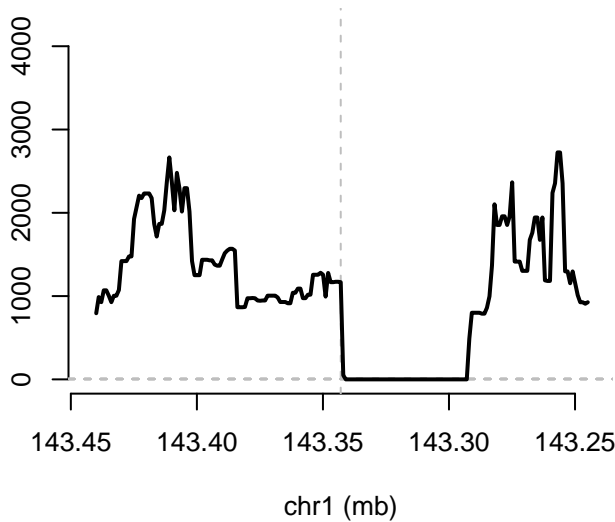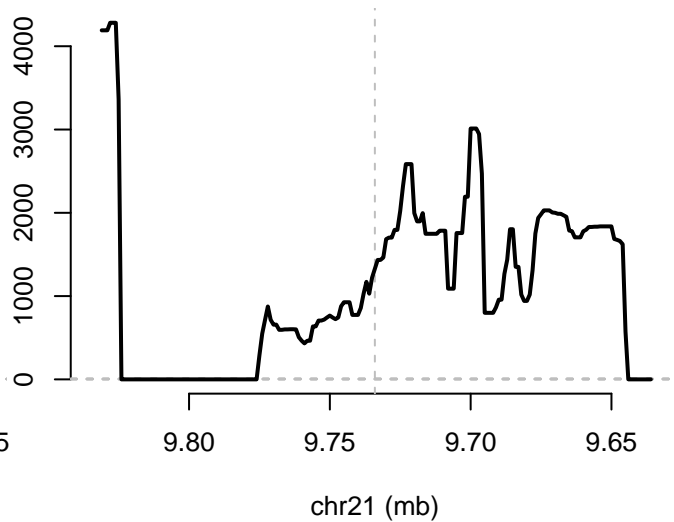

K562 chr21:9,734,014::chr1:143,342,937+-

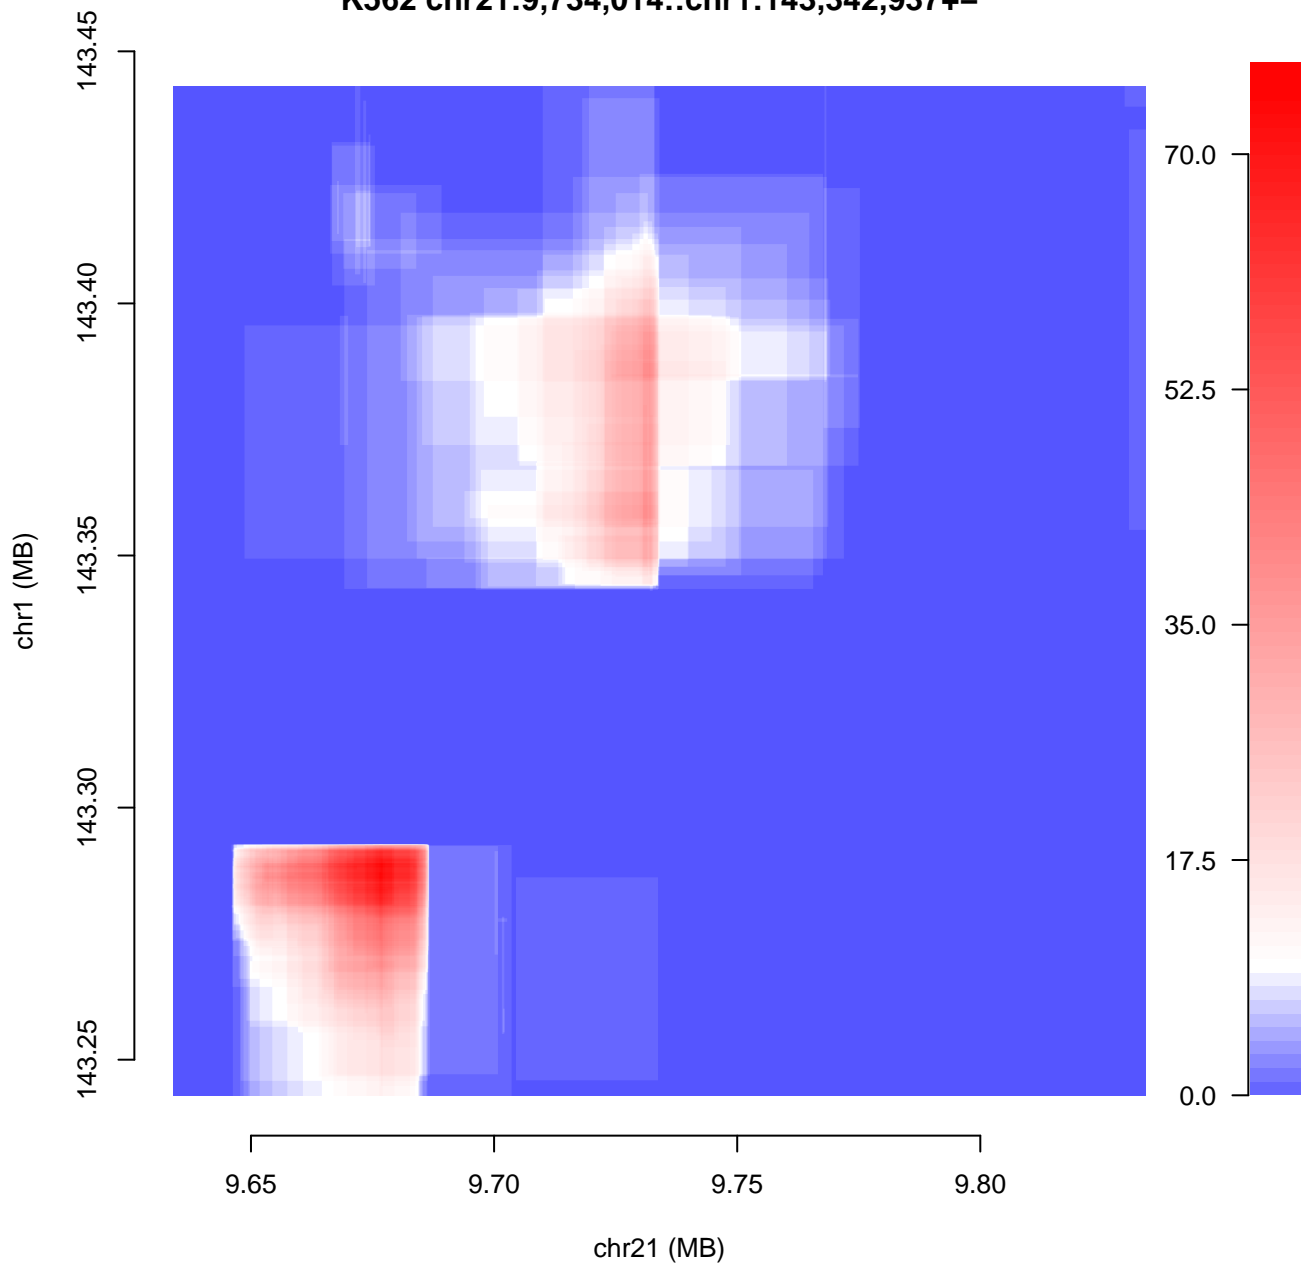

Supplement: Supplemental_Data.zip [file event_464.pdf › event_464.pdf]

Barcode

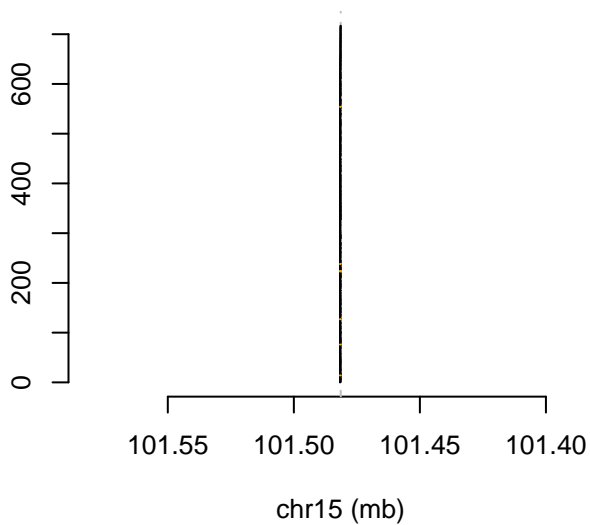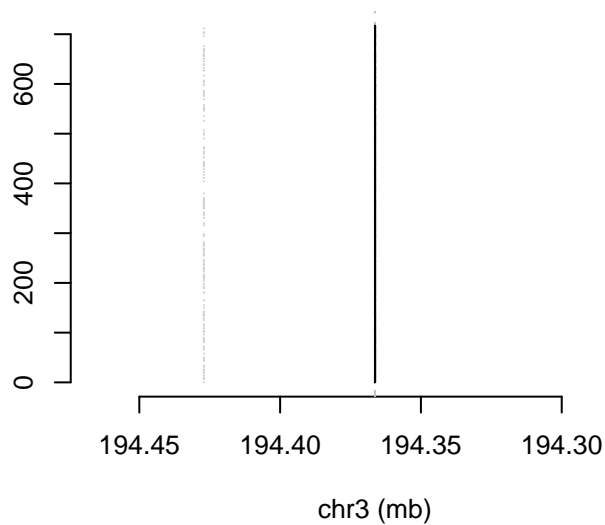

Copy number

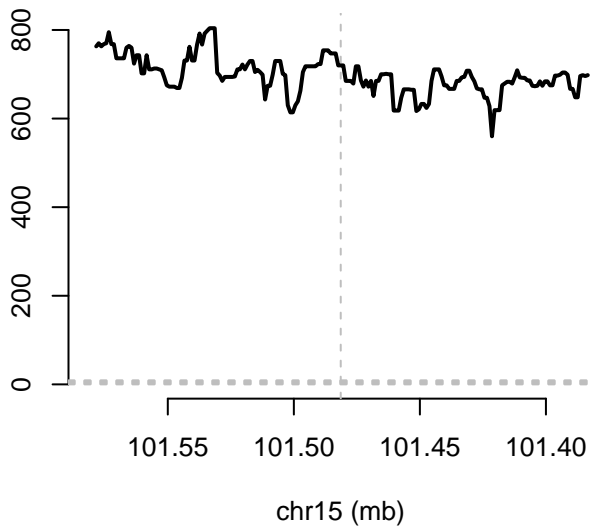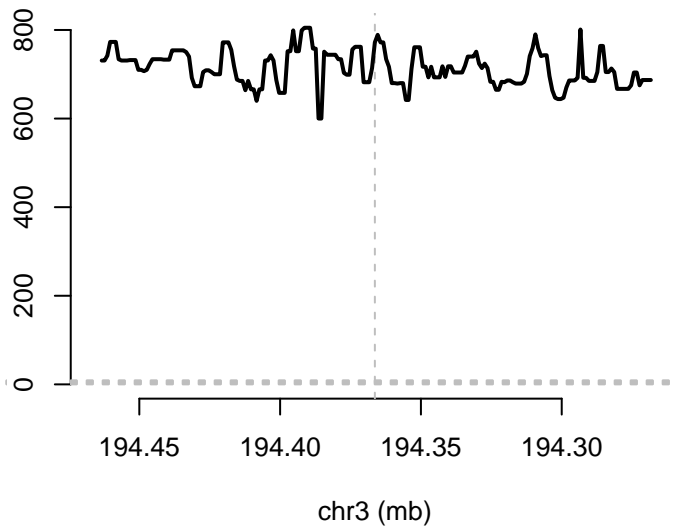

**K562 chr15:101,481,396::chr3:194,366,354-+**

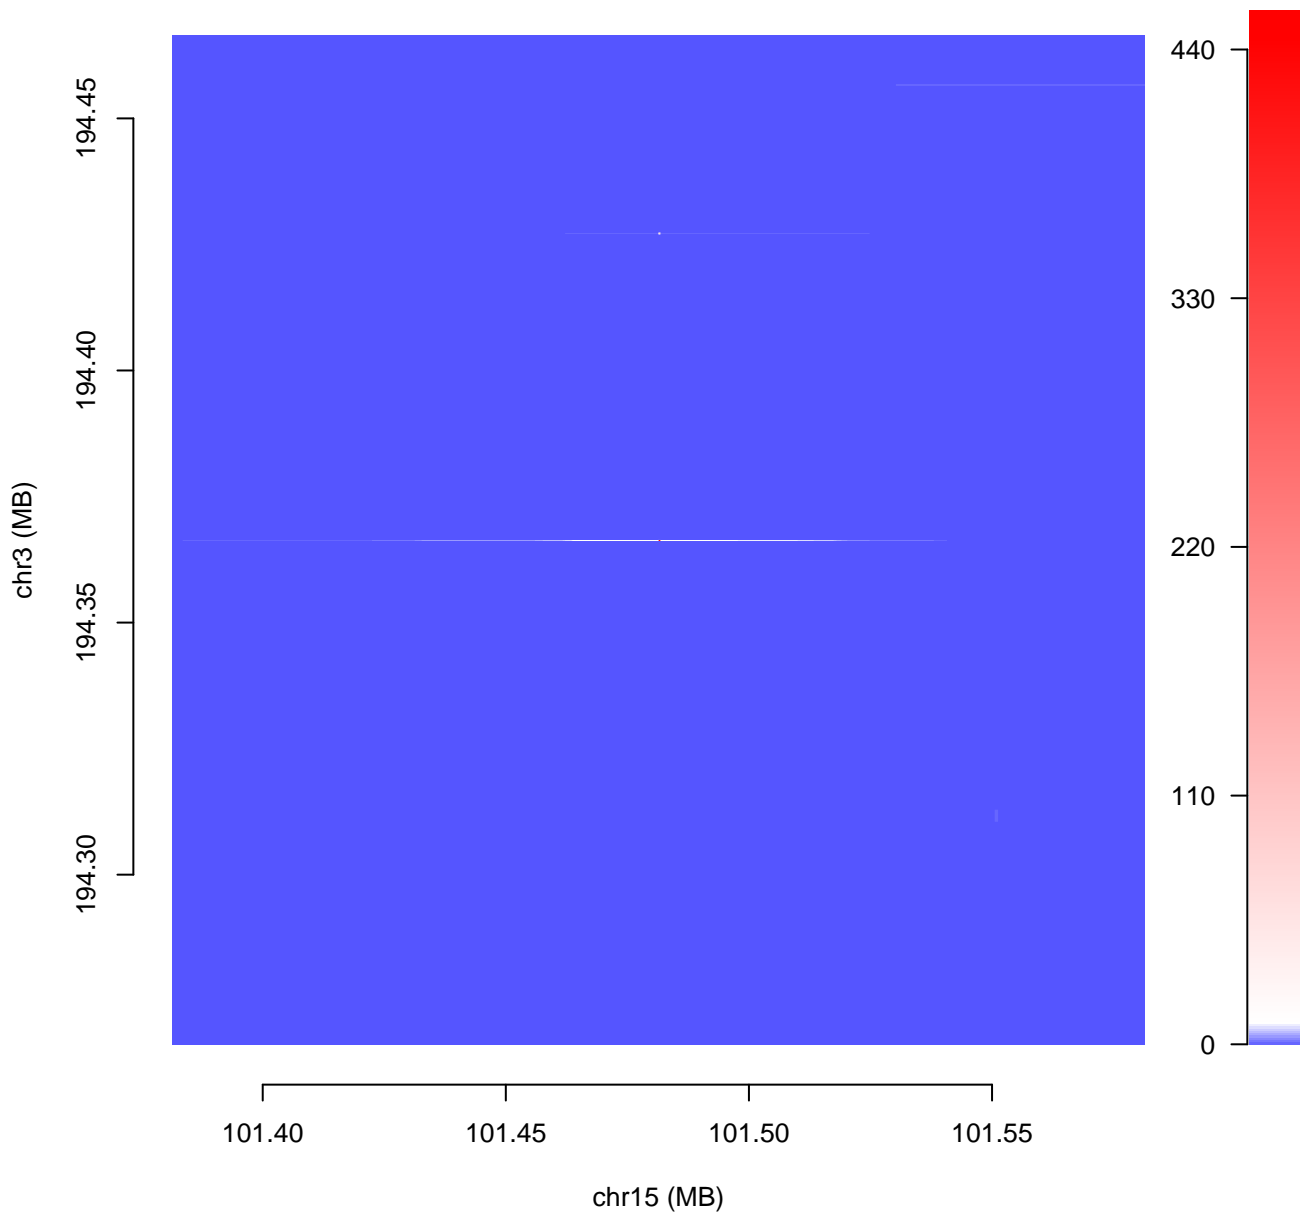

Supplement: Supplemental_Data.zip [file event_465.pdf › event_465.pdf]

Barcode

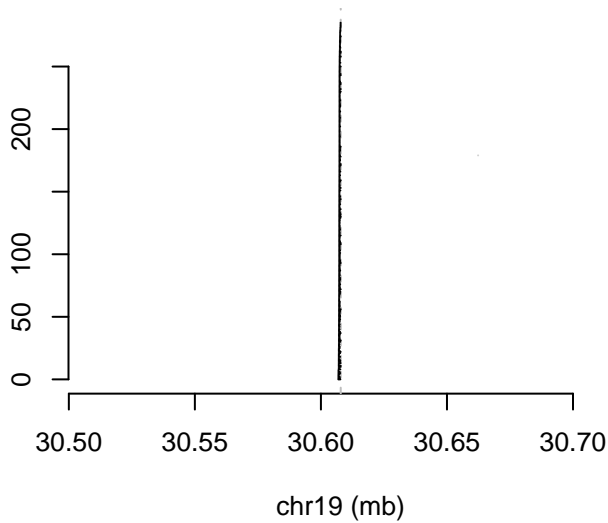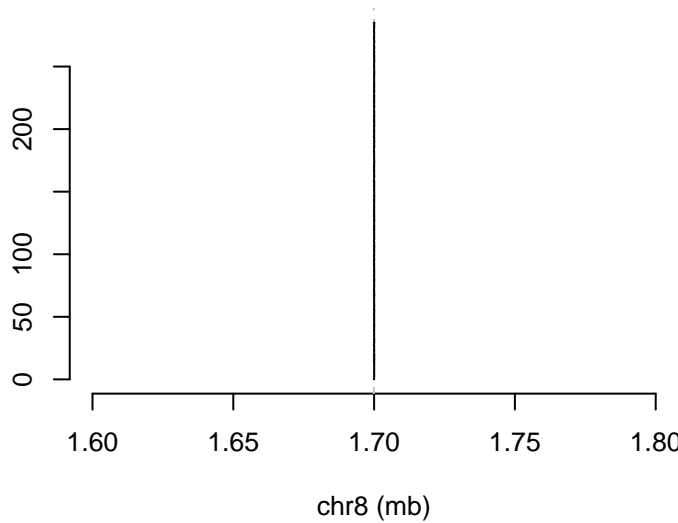

Copy number

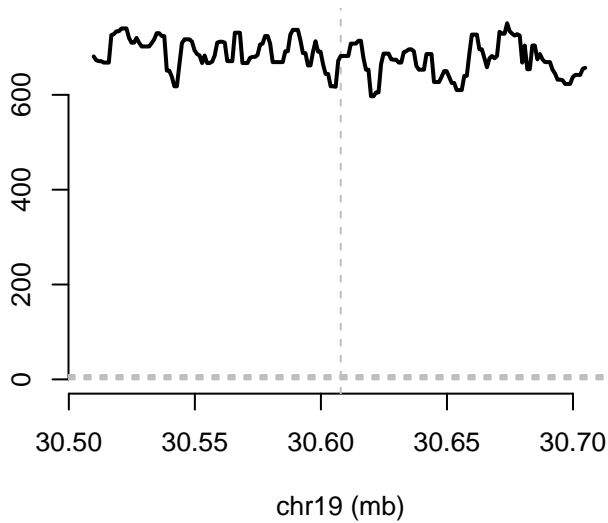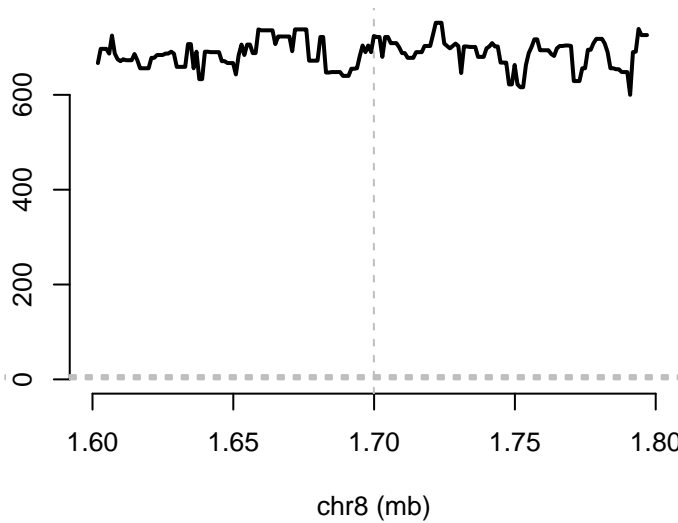

K562 chr8:1,699,914::chr19:30,607,865-+

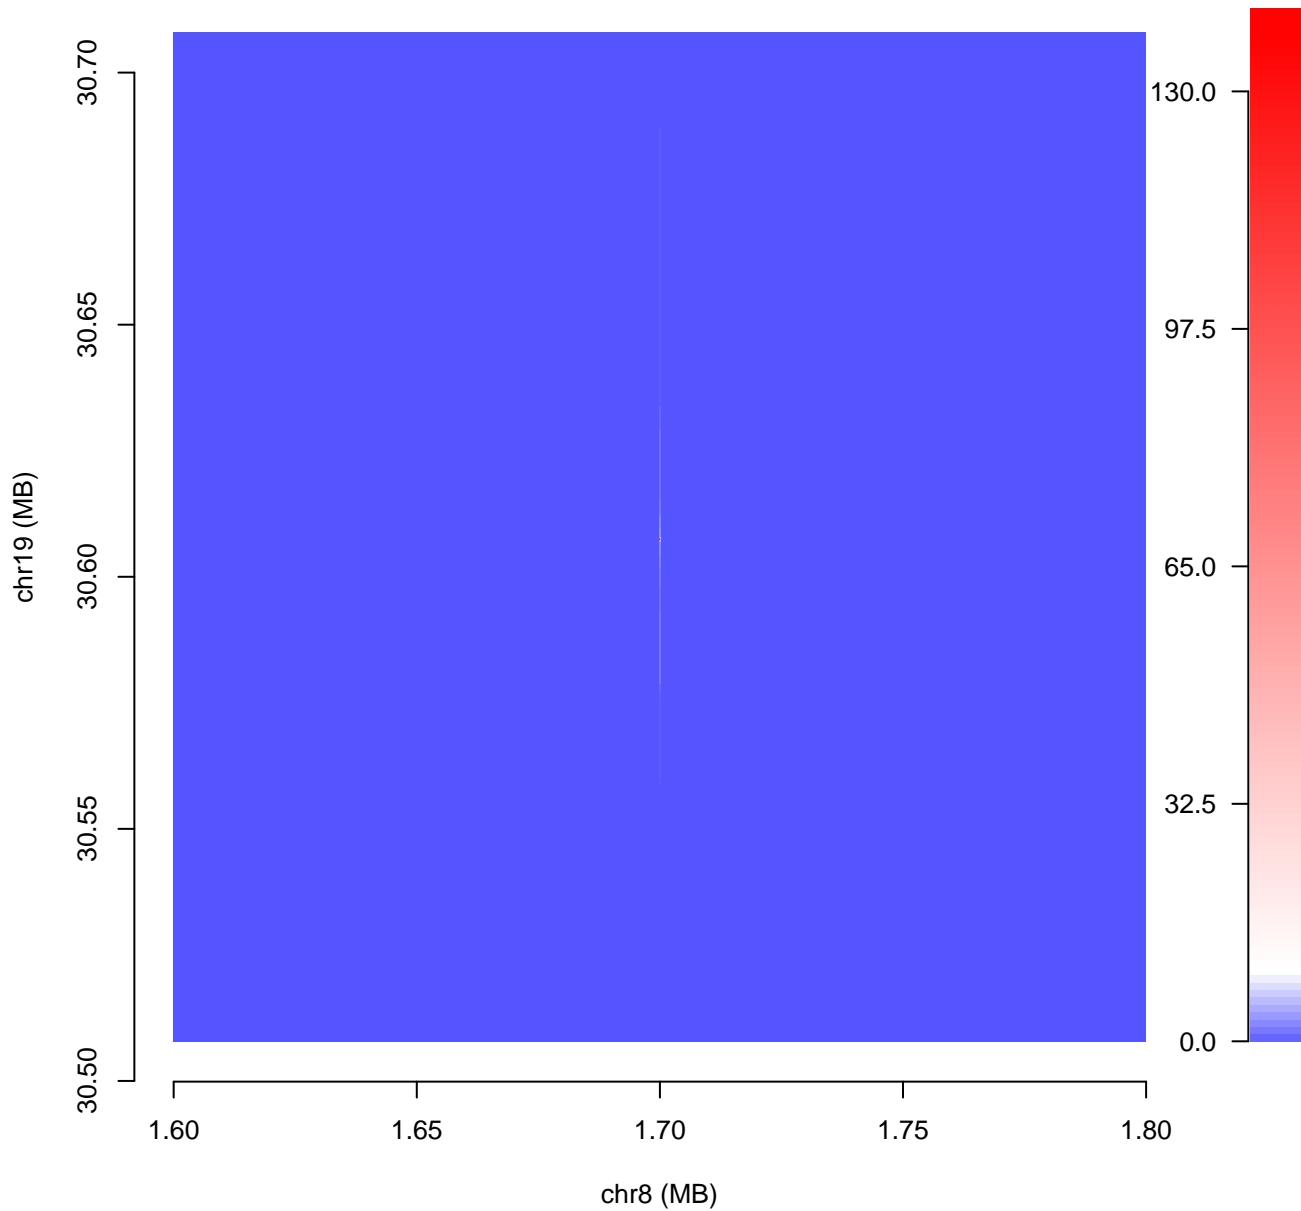

Supplement: Supplemental_Data.zip [file event_466.pdf › event_466.pdf]

Barcode

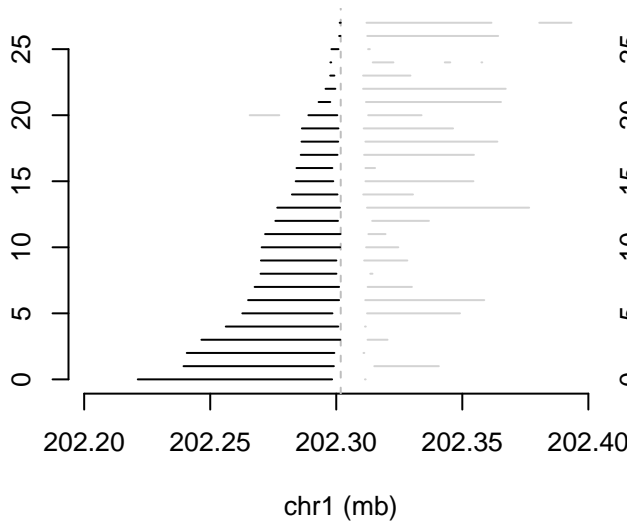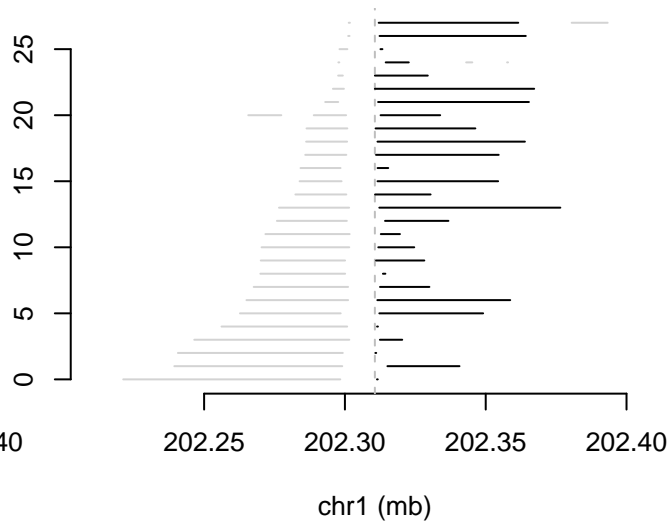

Copy number

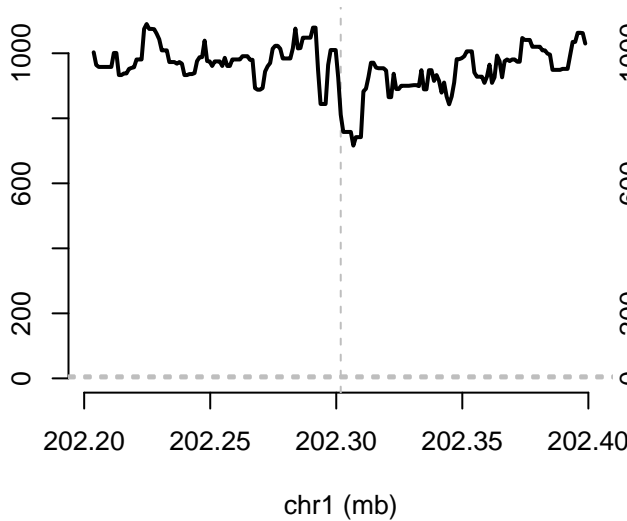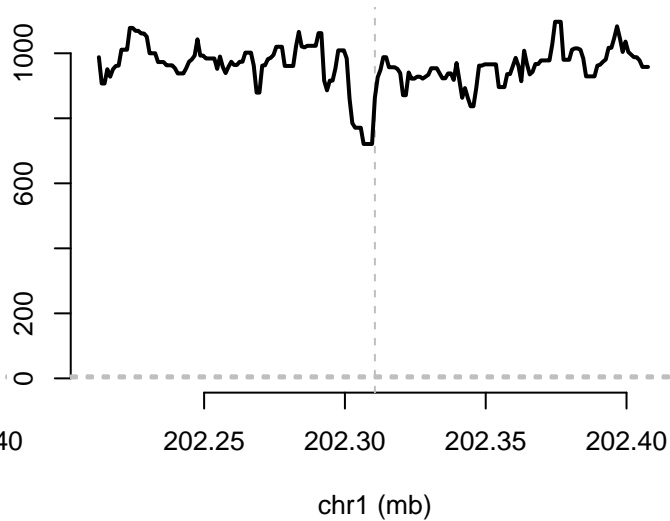

K562 chr1:202,301,779::chr1:202,310,636+-

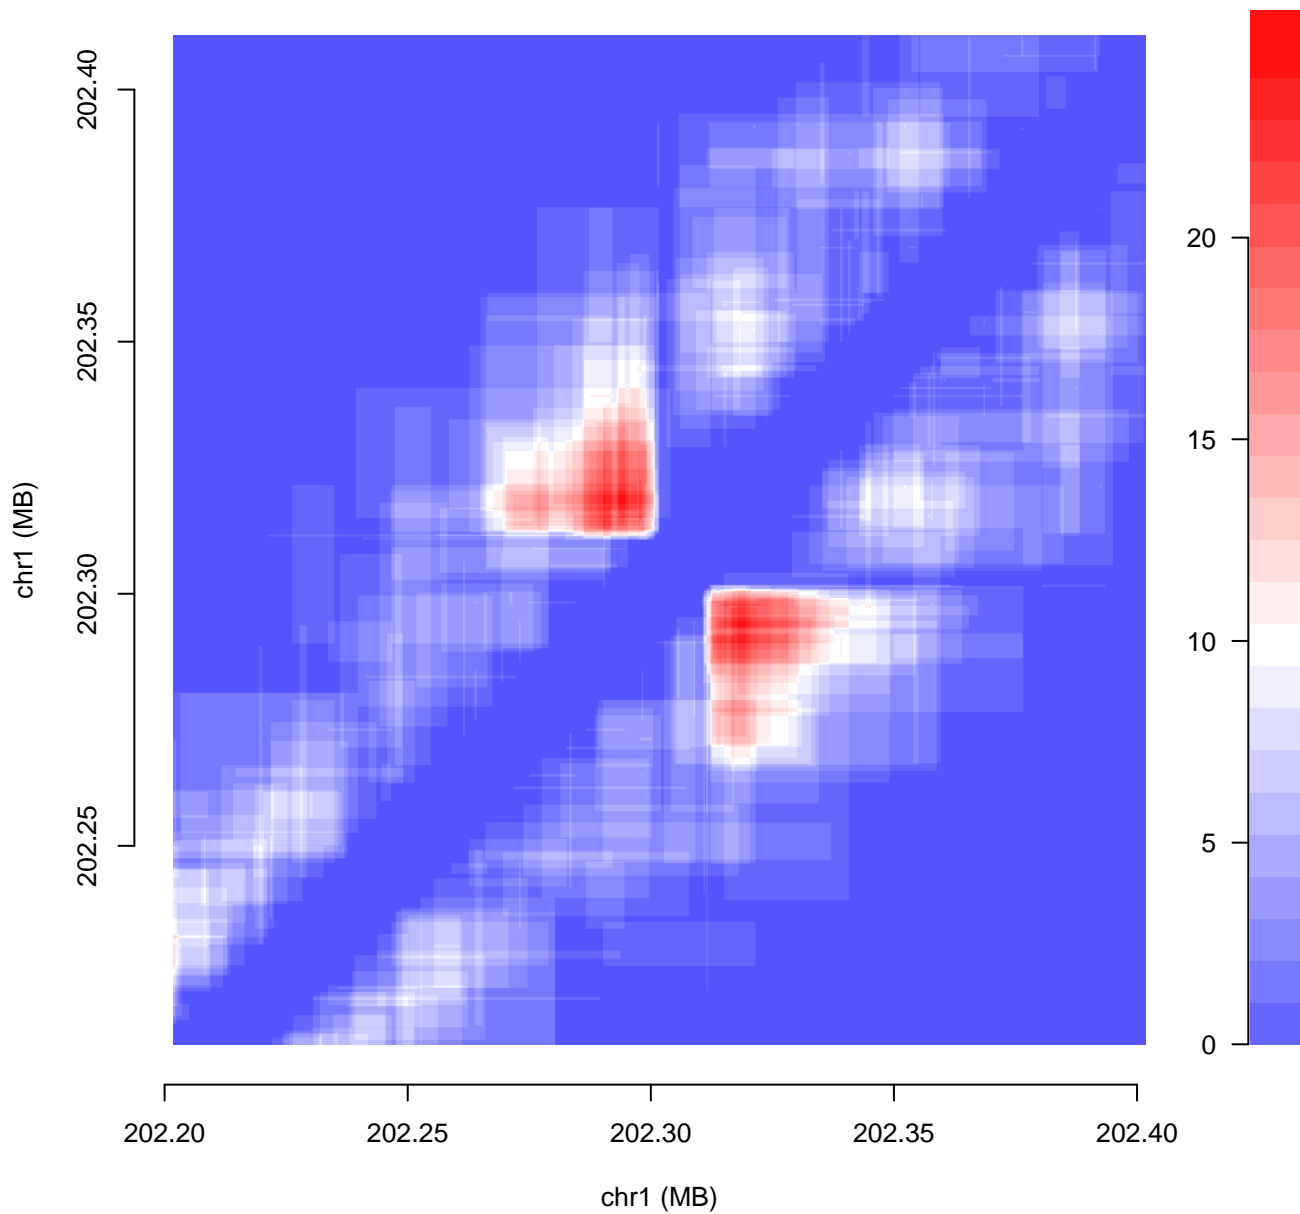

Supplement: Supplemental_Data.zip [file event_467.pdf › event_467.pdf]

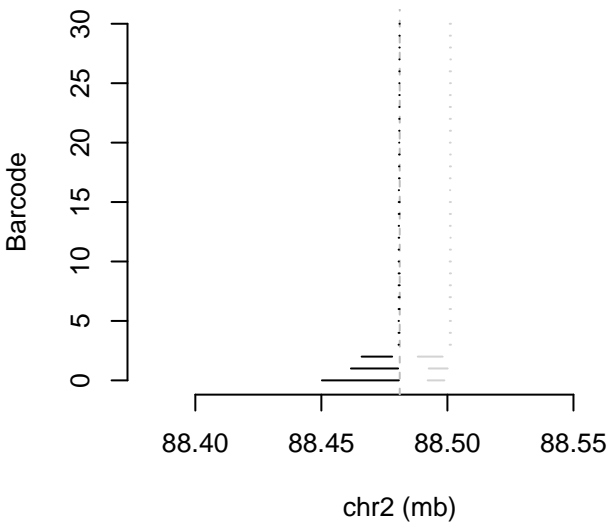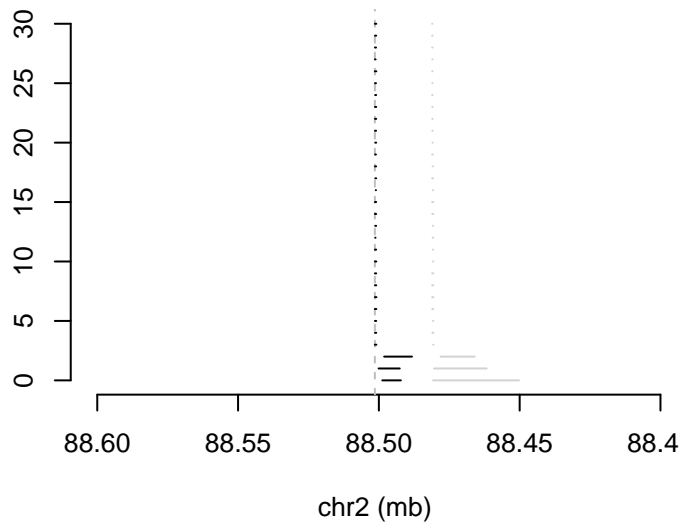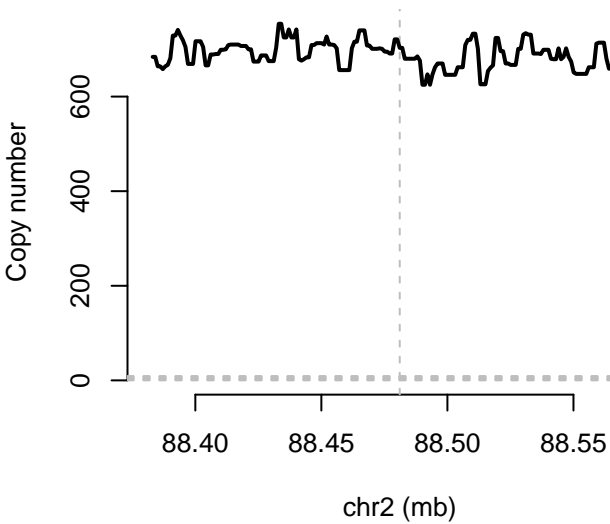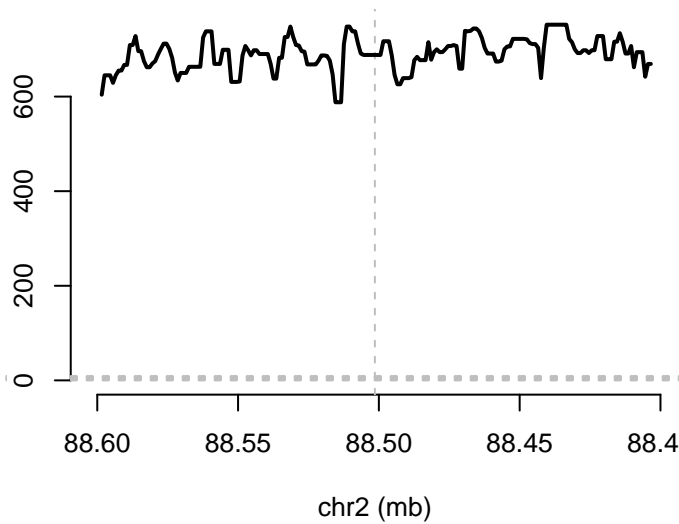

K562 chr2:88,481,090::chr2:88,501,415++

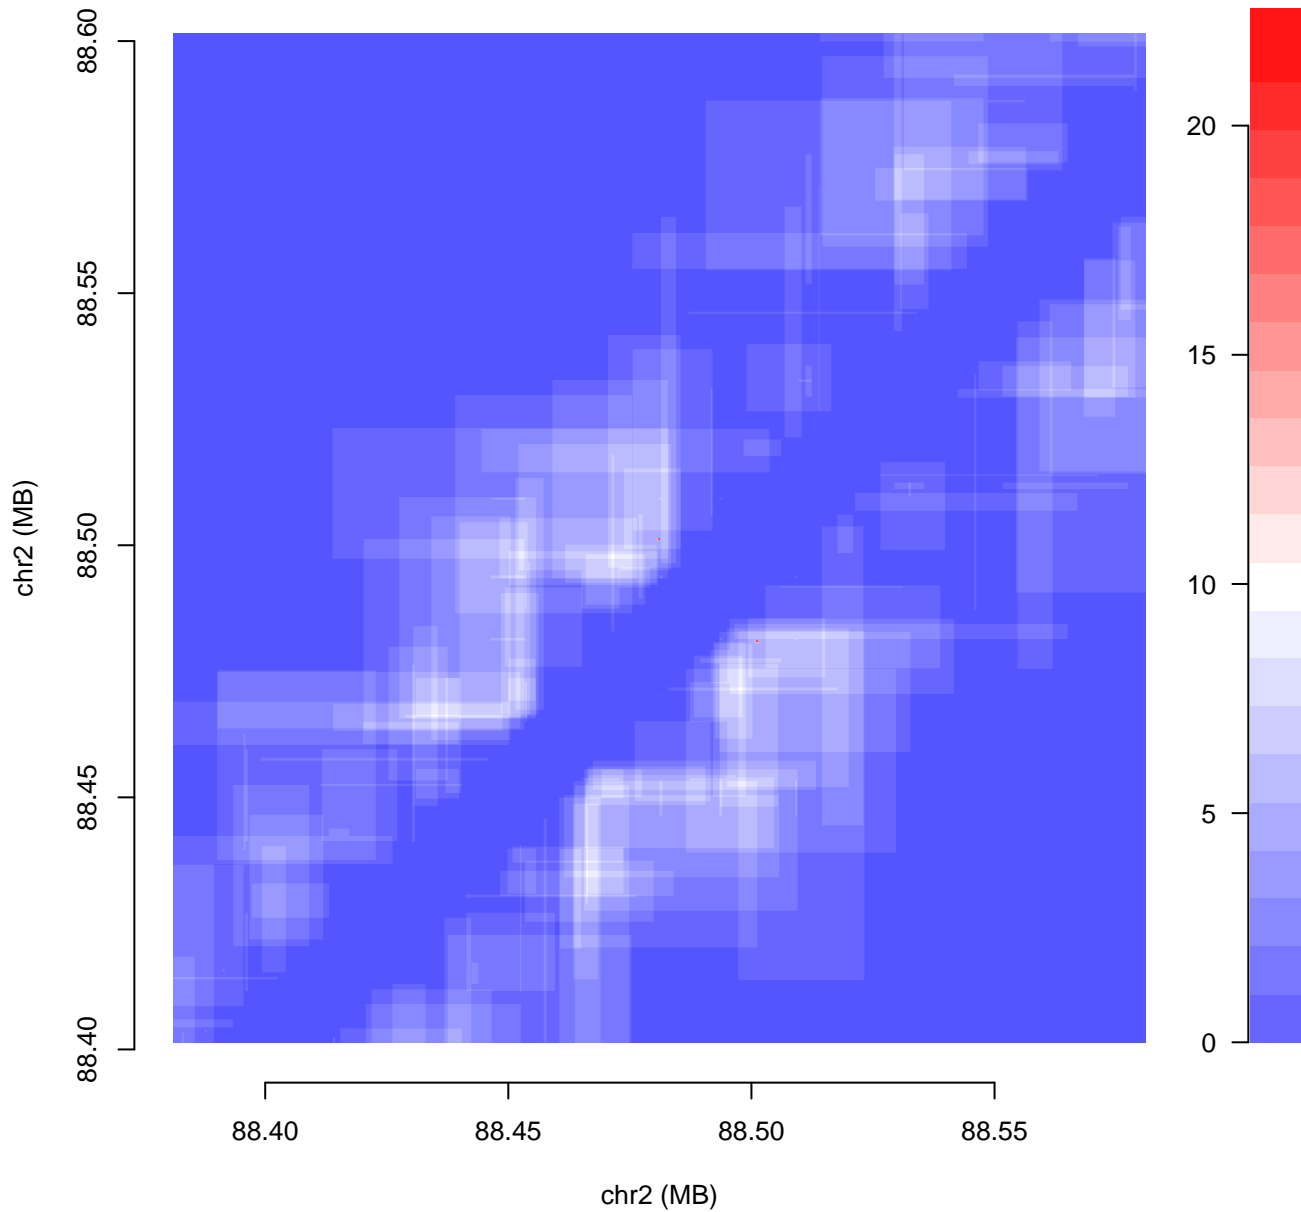

Supplement: Supplemental_Data.zip [file event_468.pdf › event_468.pdf]

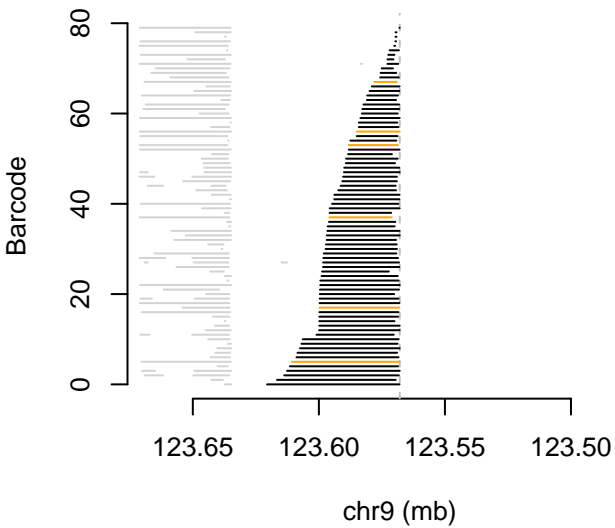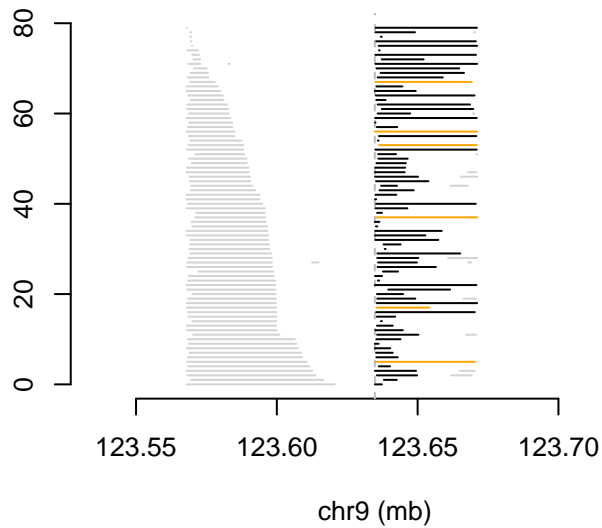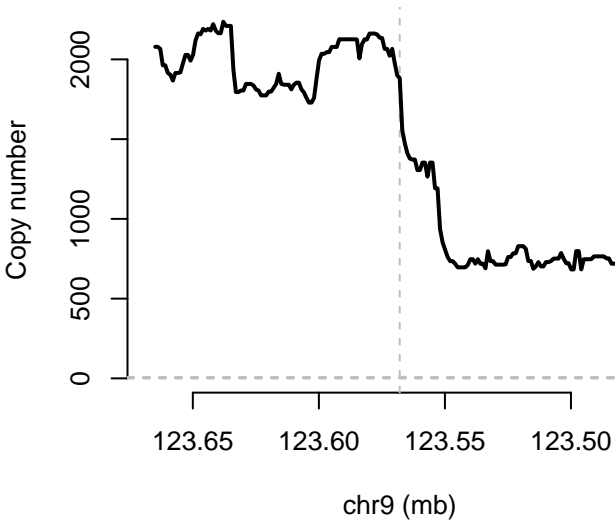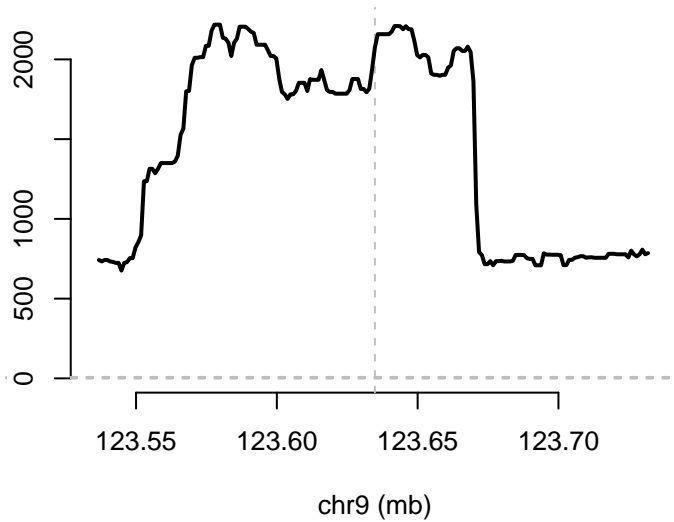

K562 chr9:123,634,812::chr9:123,567,922--

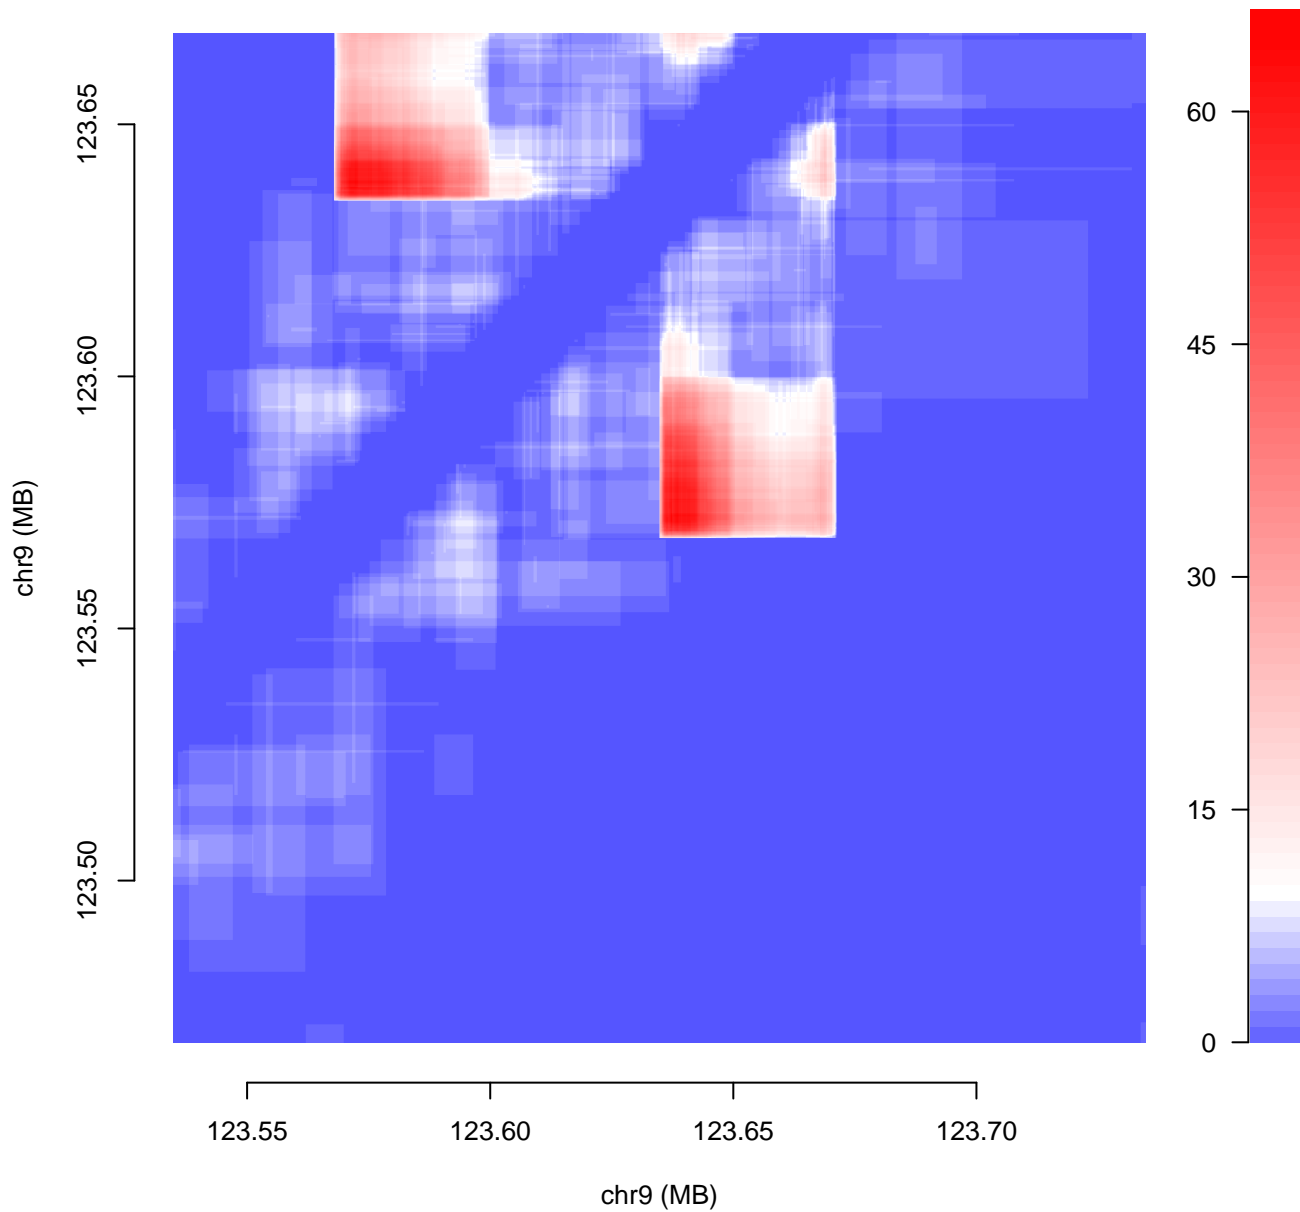

Supplement: Supplemental_Data.zip [file event_469.pdf › event_469.pdf]

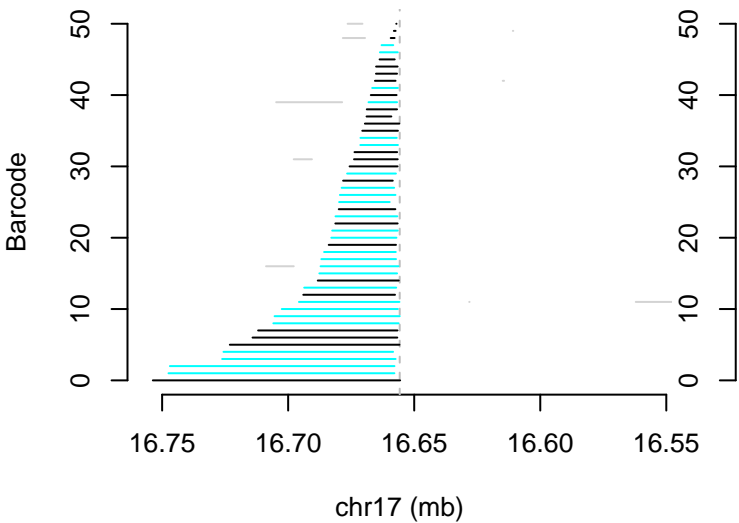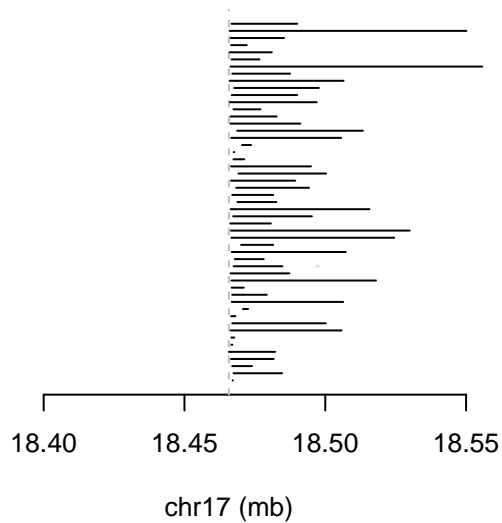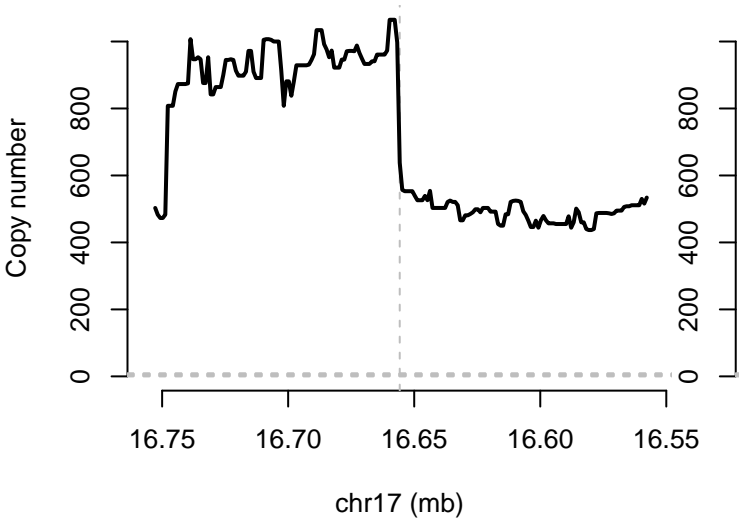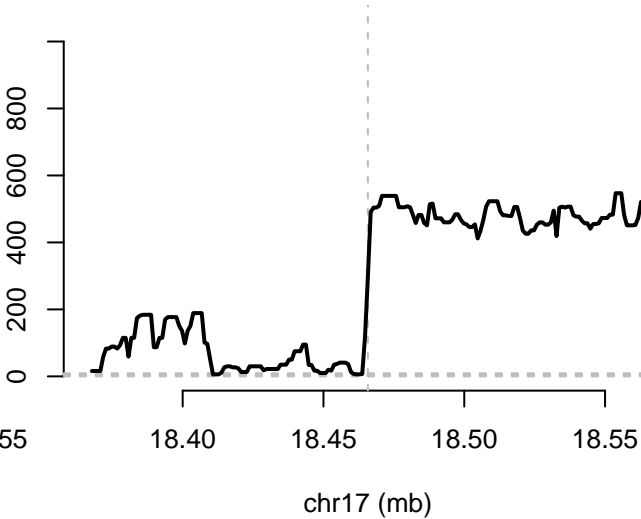

K562 chr17:16,655,741::chr17:18,465,772--

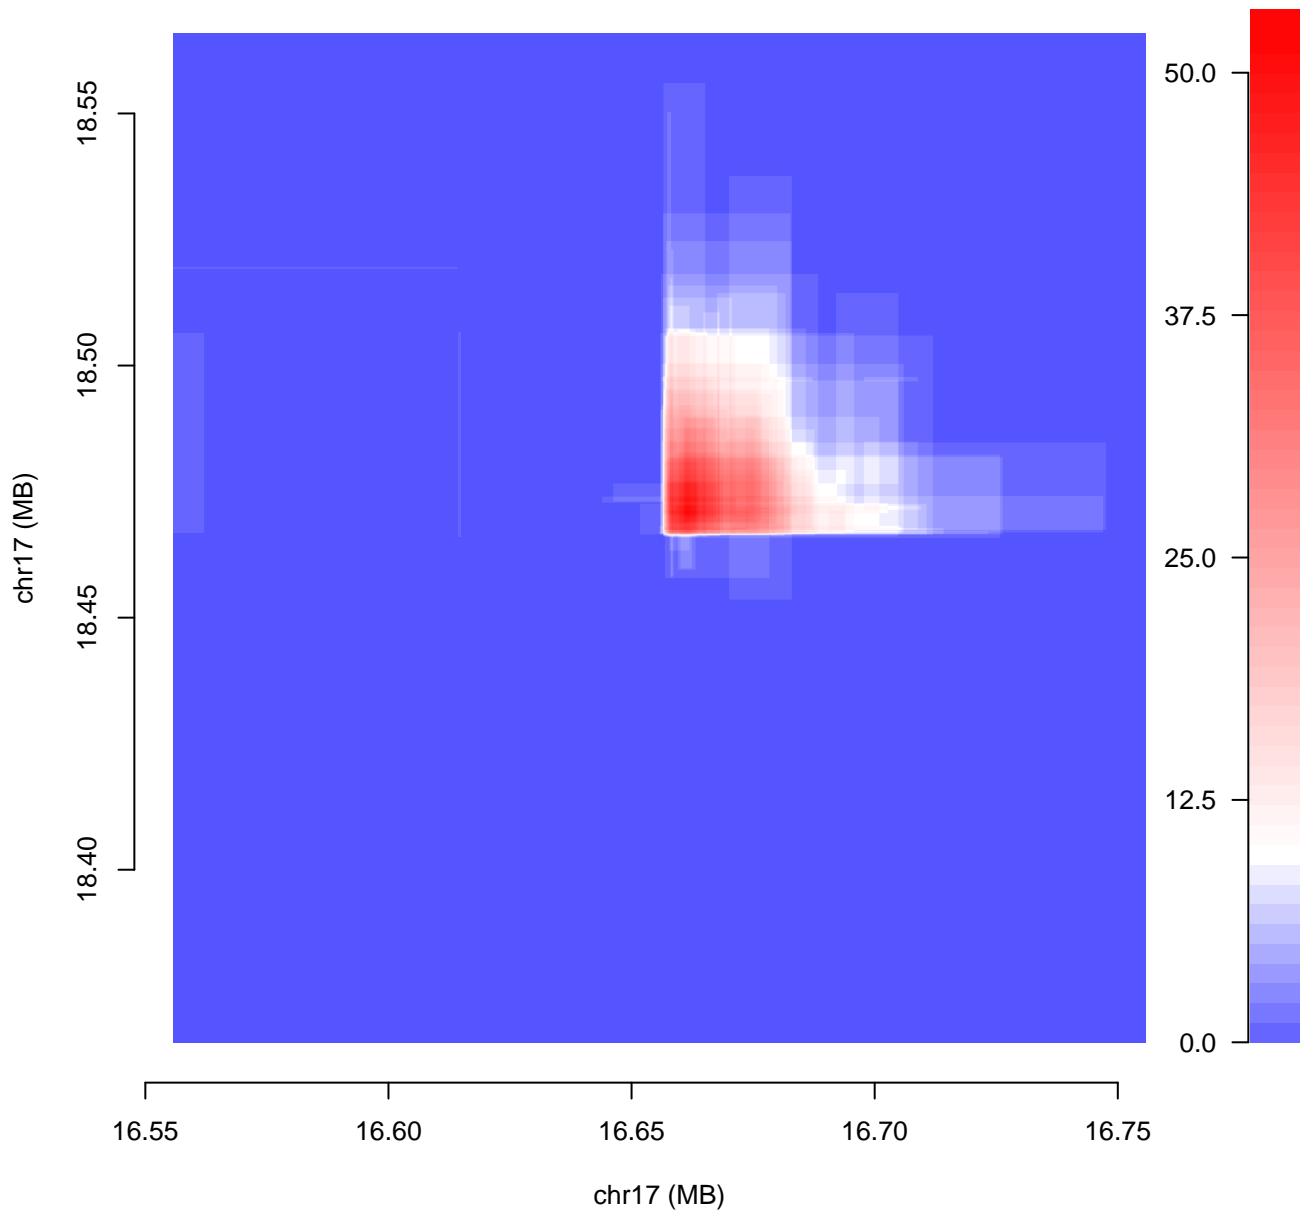

Supplement: Supplemental_Data.zip [file event_47.pdf › event_47.pdf]

Barcode

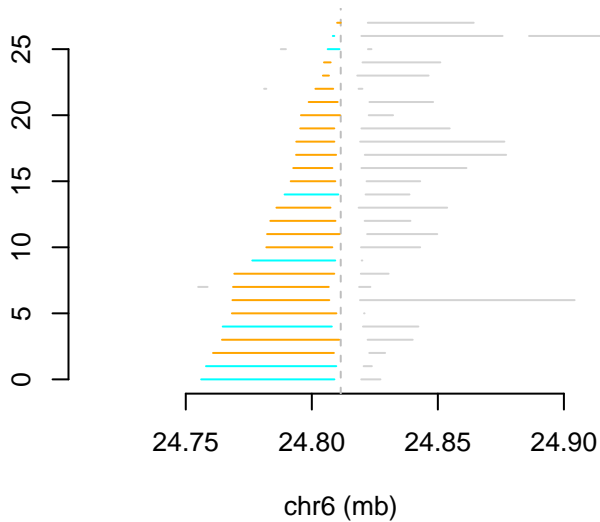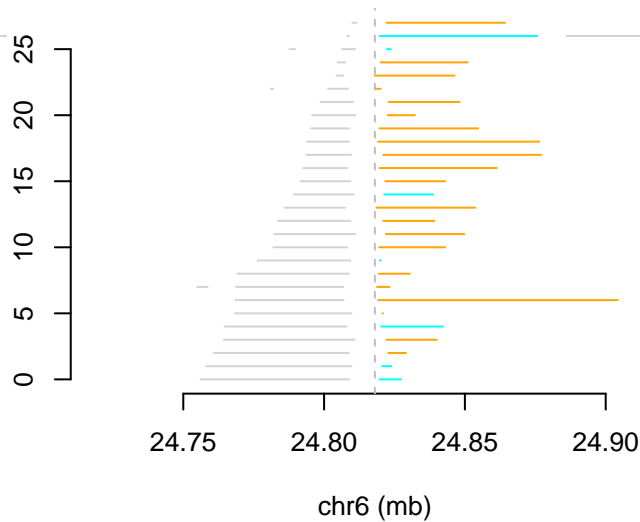

Copy number

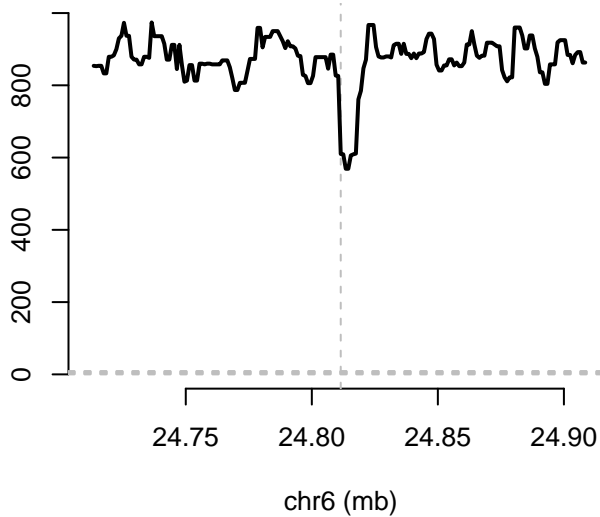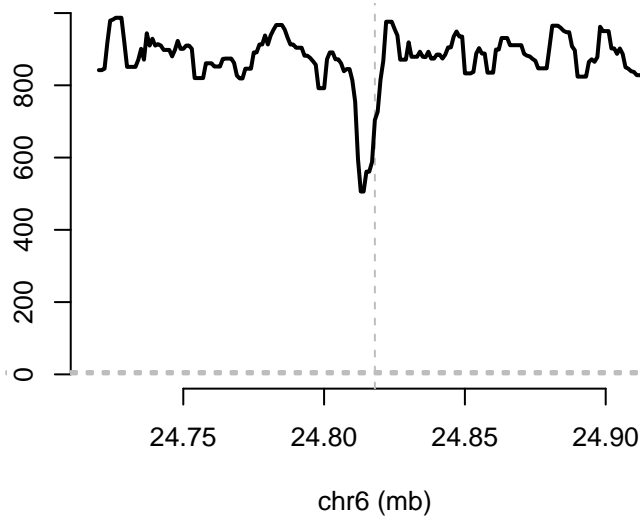

K562 chr6:24,818,030::chr6:24,811,475-+

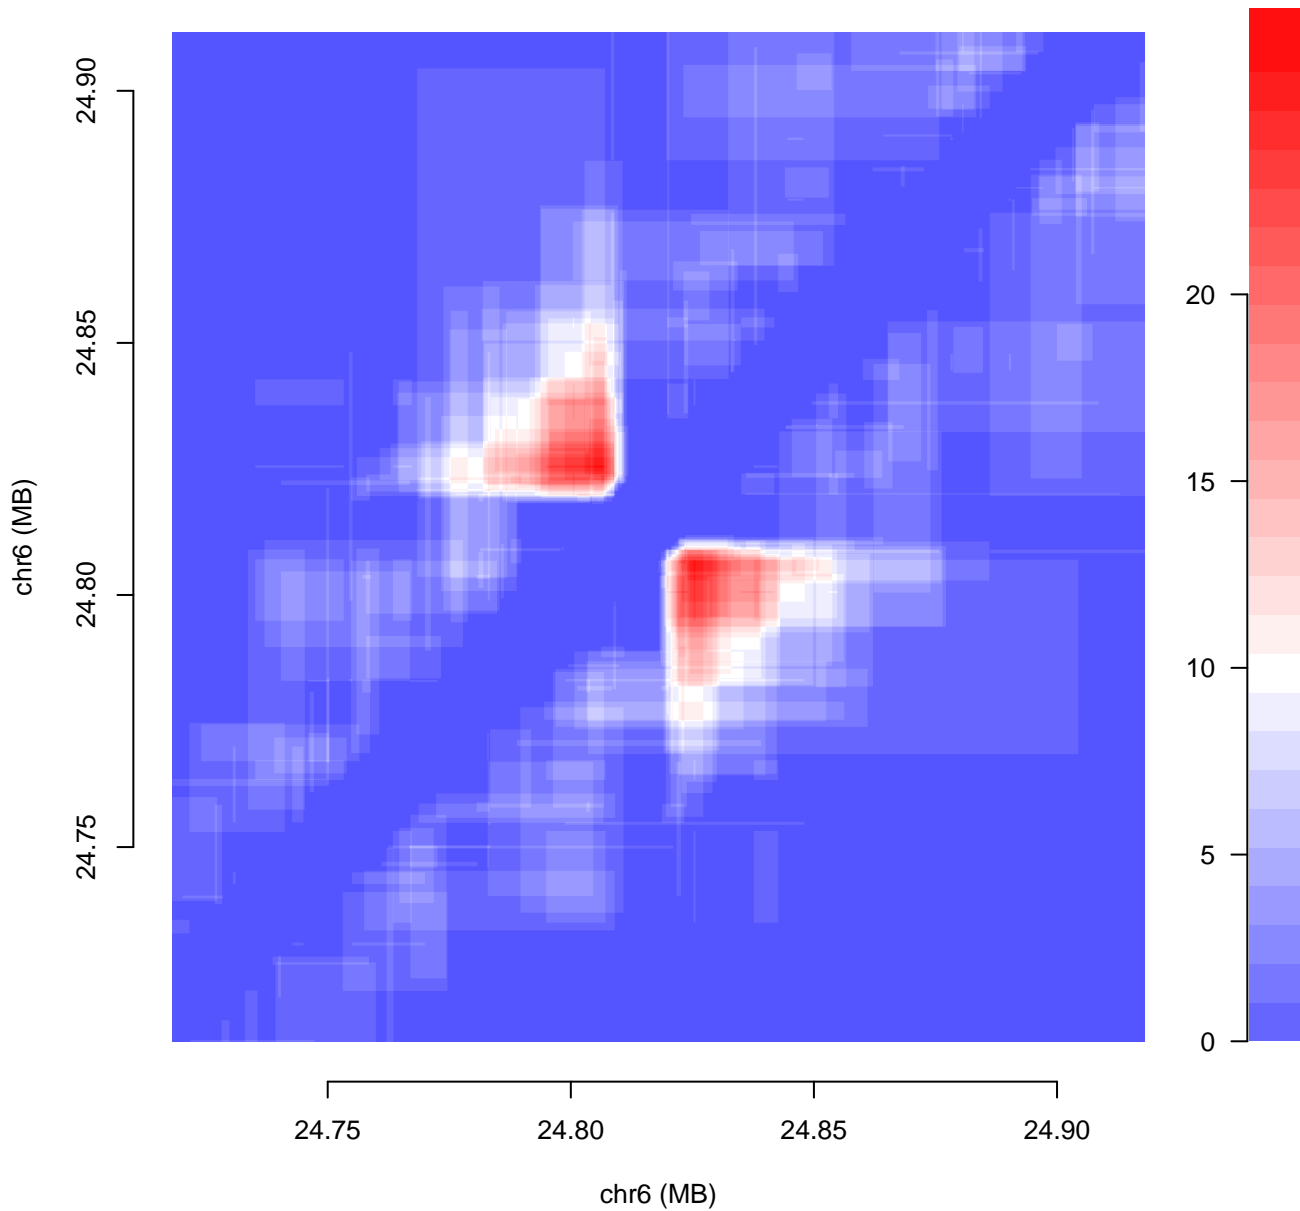

Supplement: Supplemental_Data.zip [file event_470.pdf › event_470.pdf]

Barcode

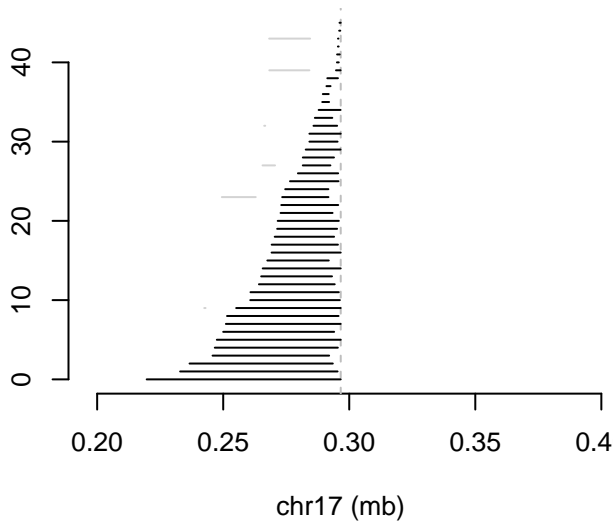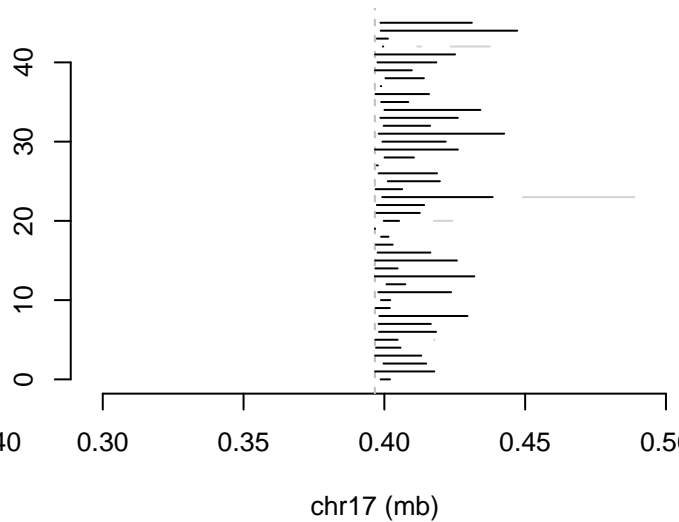

Copy number

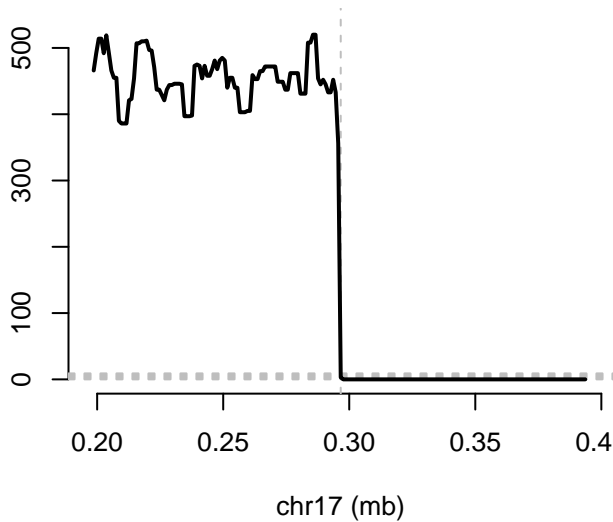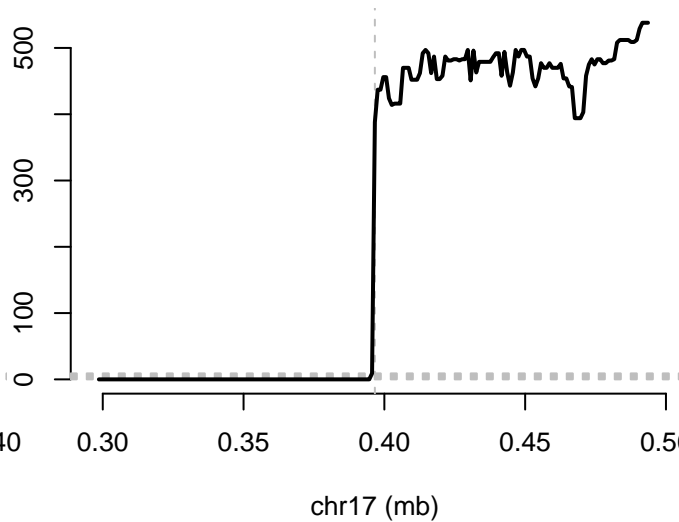

K562 chr17:296,626::chr17:396,628+-

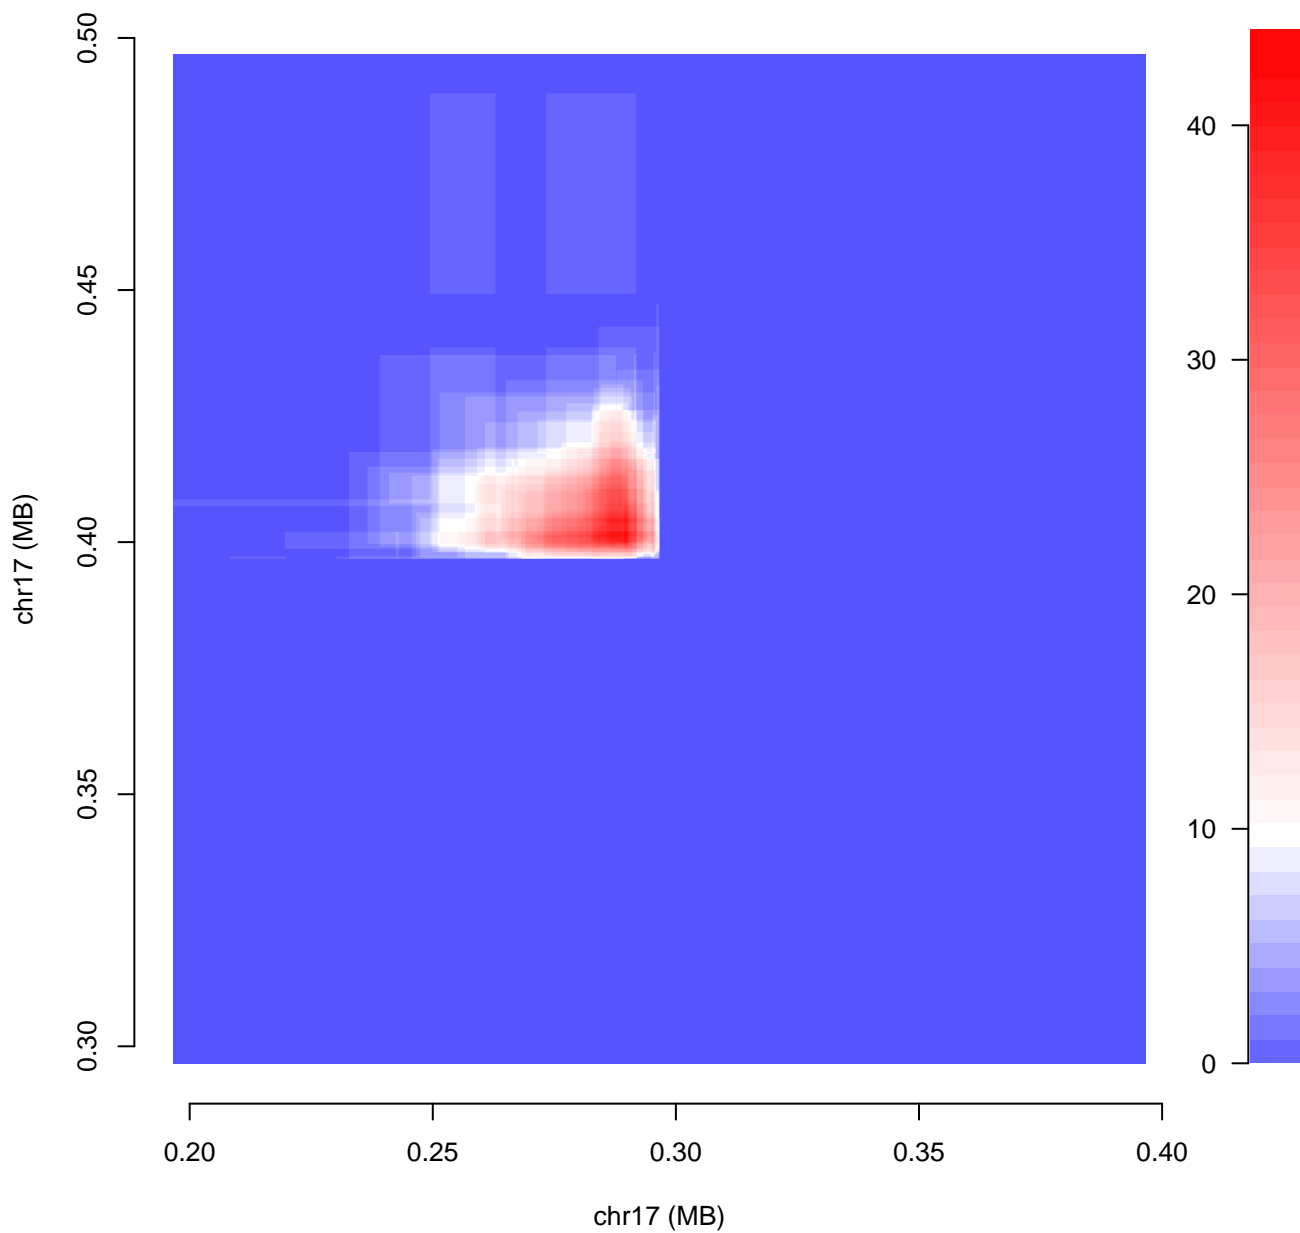

Supplement: Supplemental_Data.zip [file event_471.pdf › event_471.pdf]

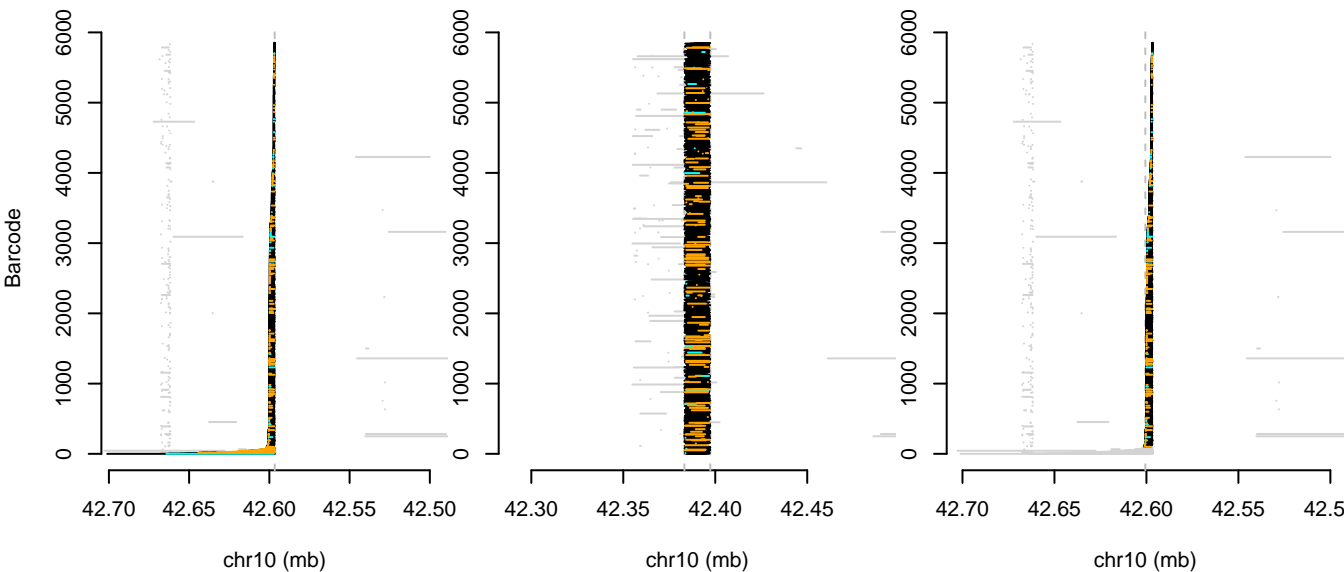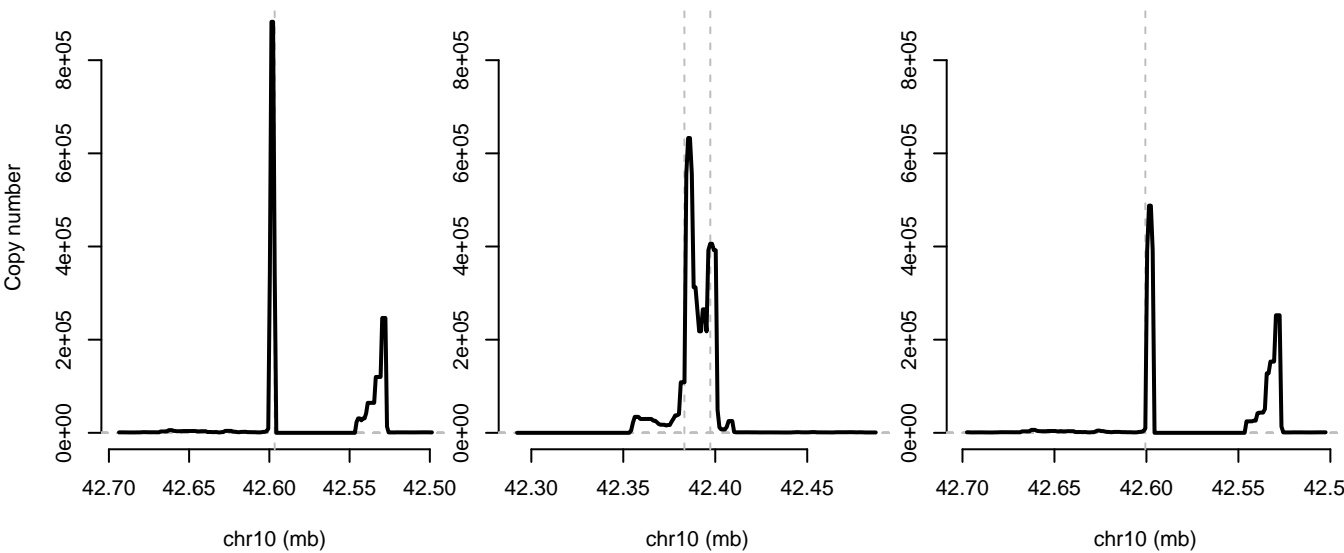

K562 chr10:42,397,296::chr10:42,600,589++

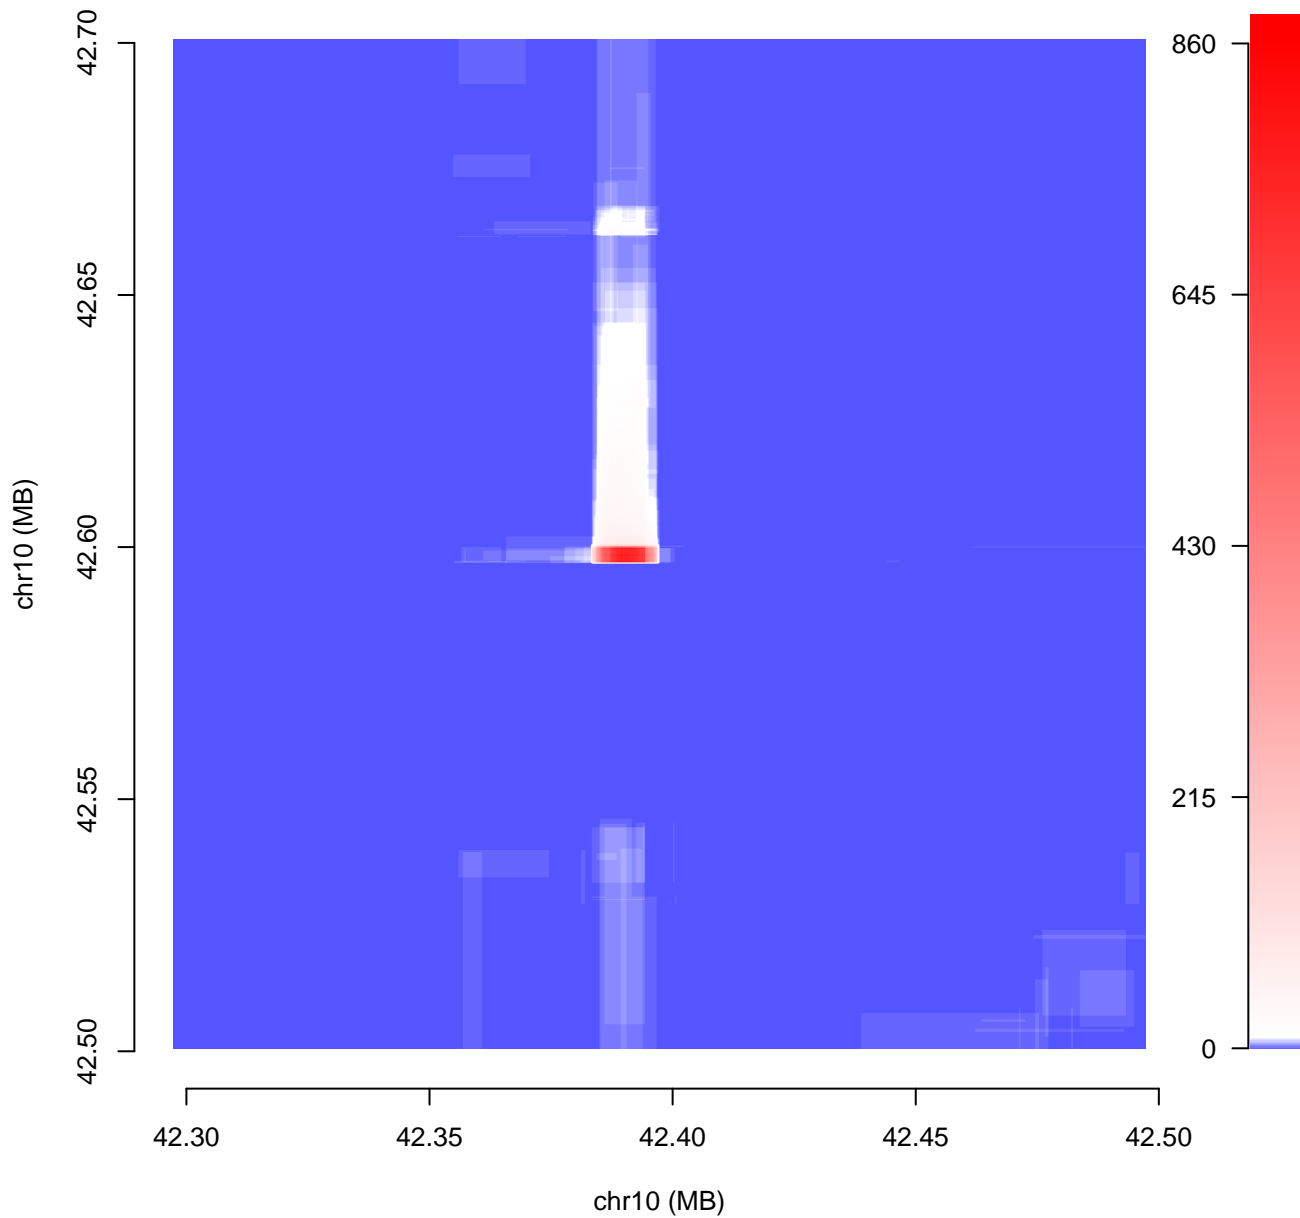

K562 chr10:42,397,296::chr10:42,383,220+-

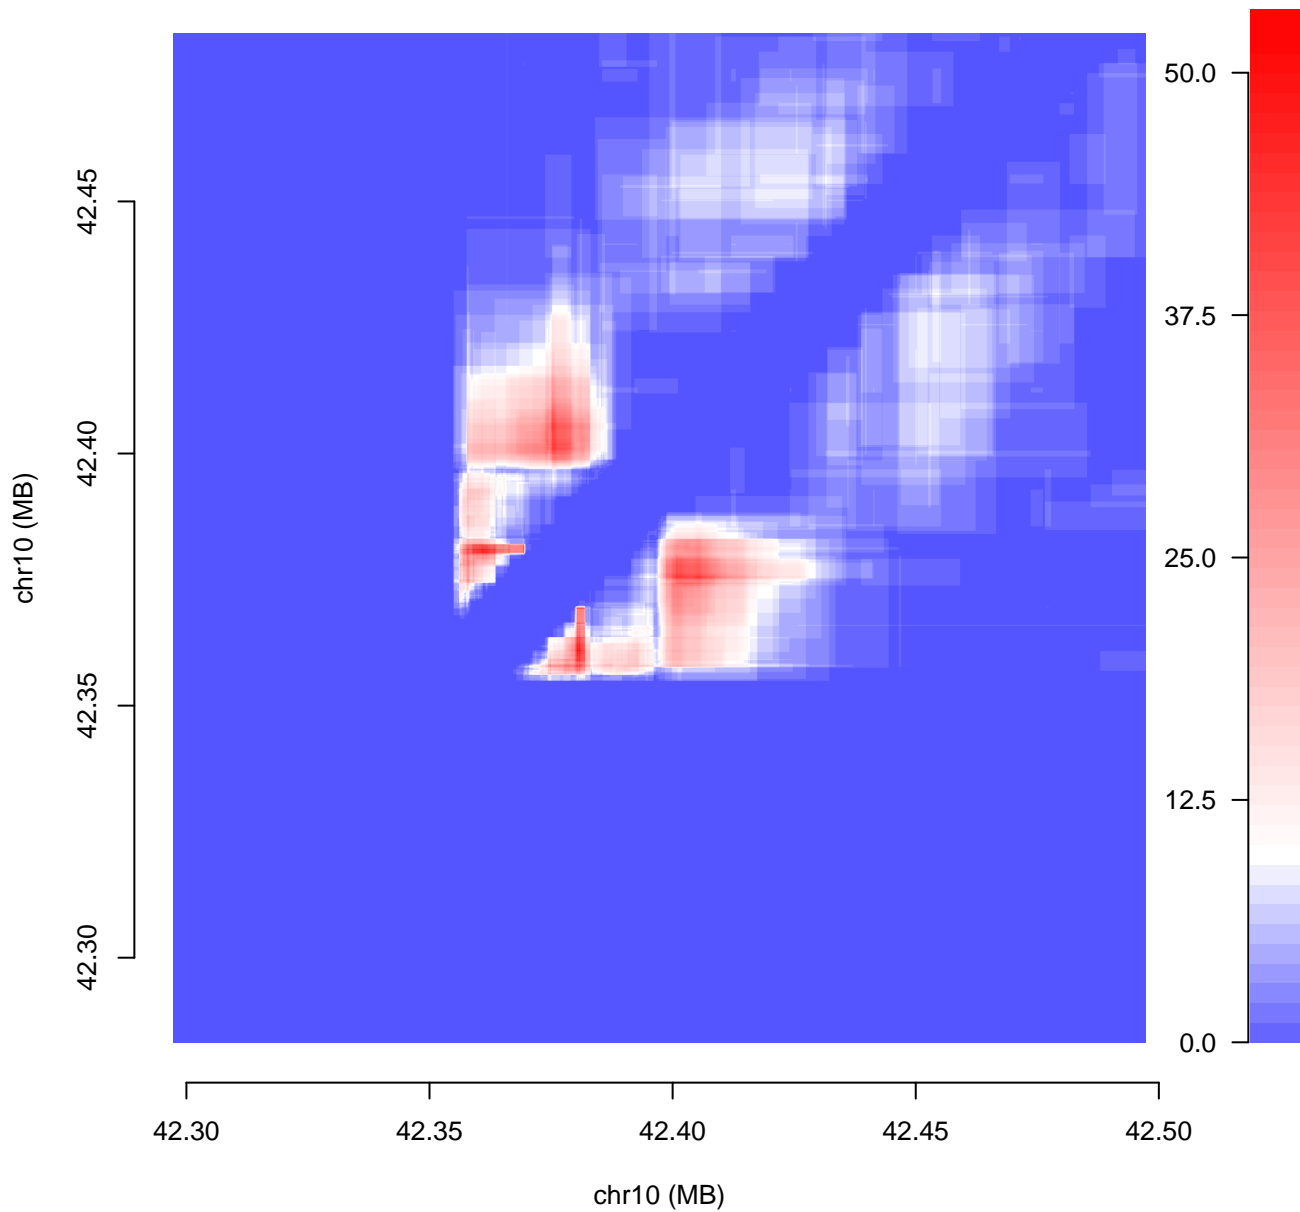

K562 chr10:42,383,220::chr10:42,596,686--

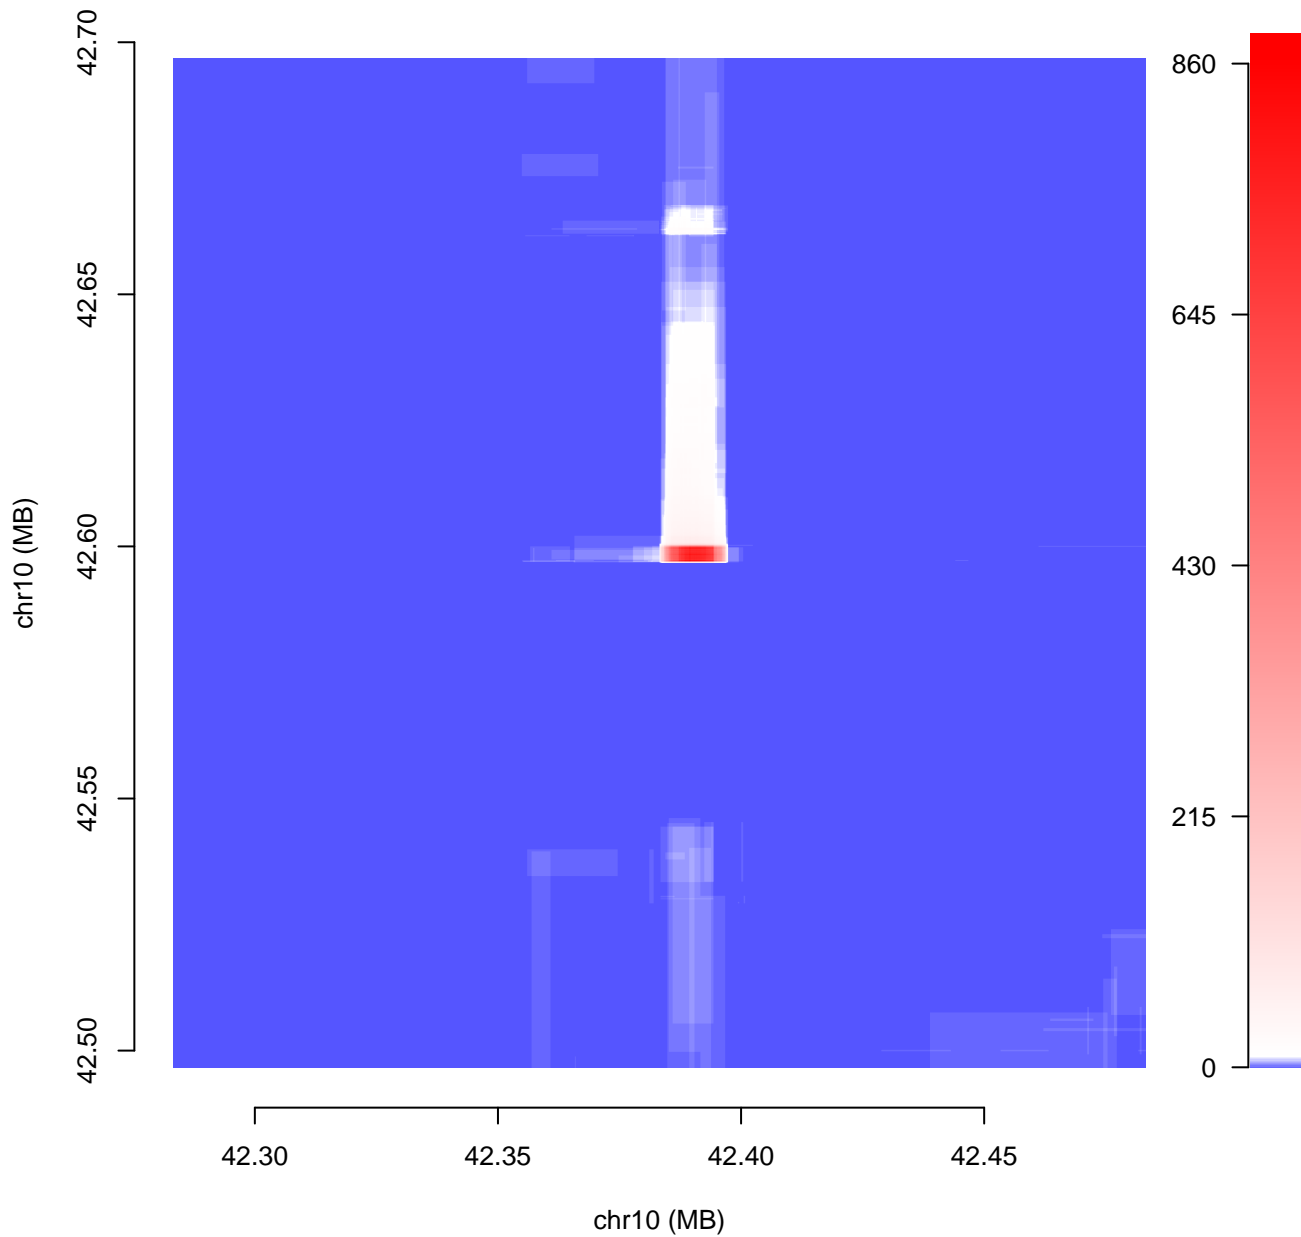

Supplement: Supplemental_Data.zip [file event_472.pdf › event_472.pdf]

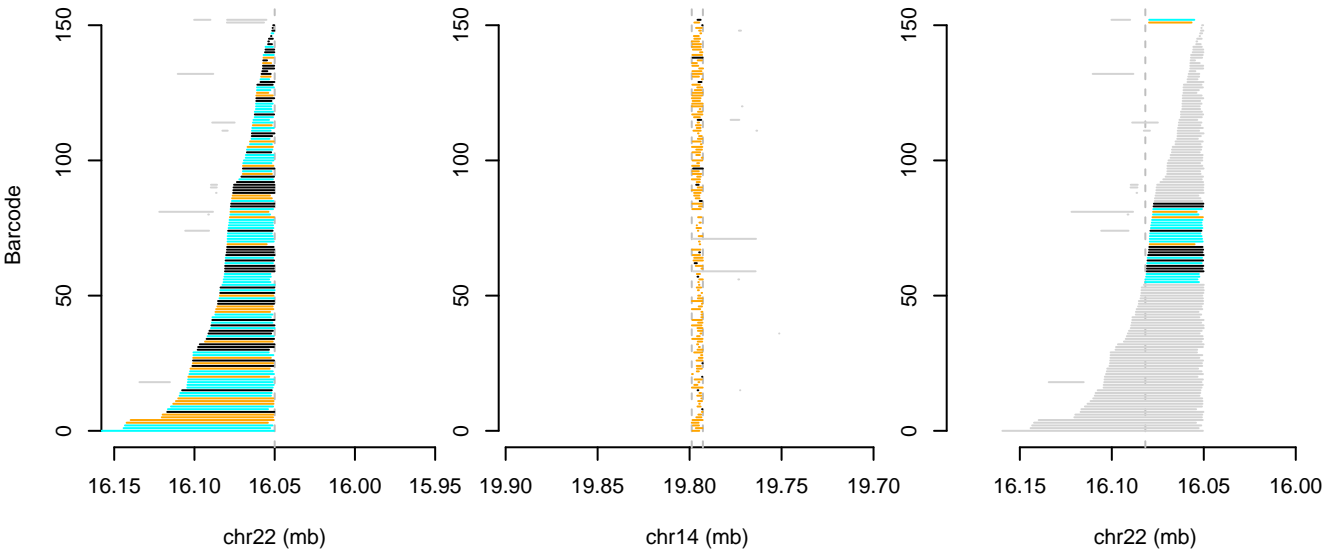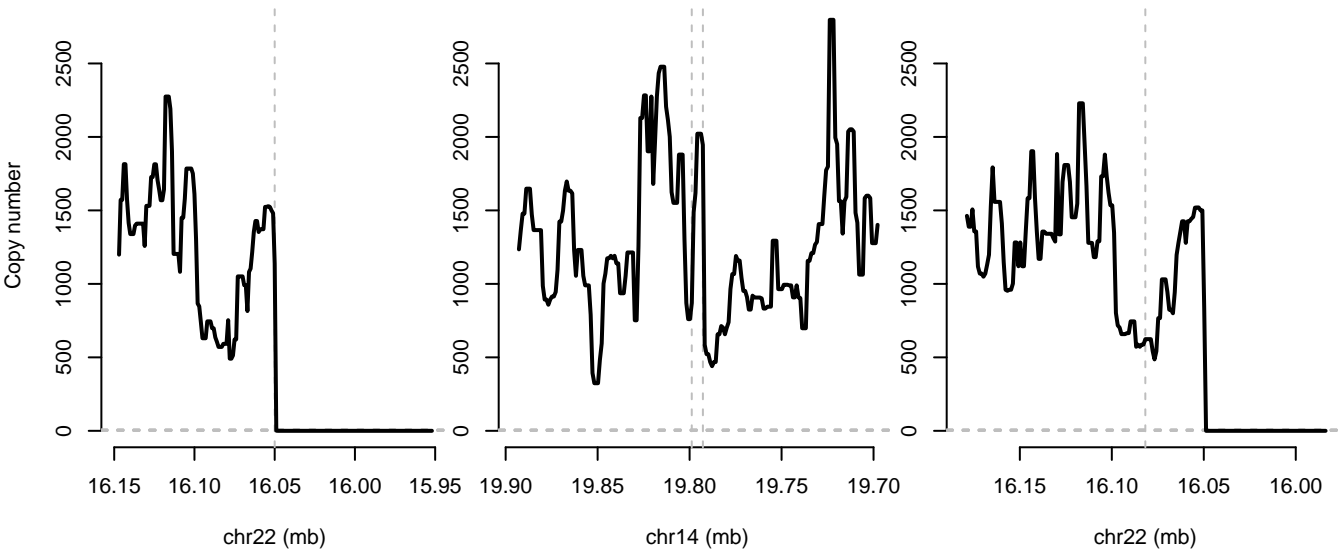

K562 chr14:19,798,817::chr22:16,050,001+-

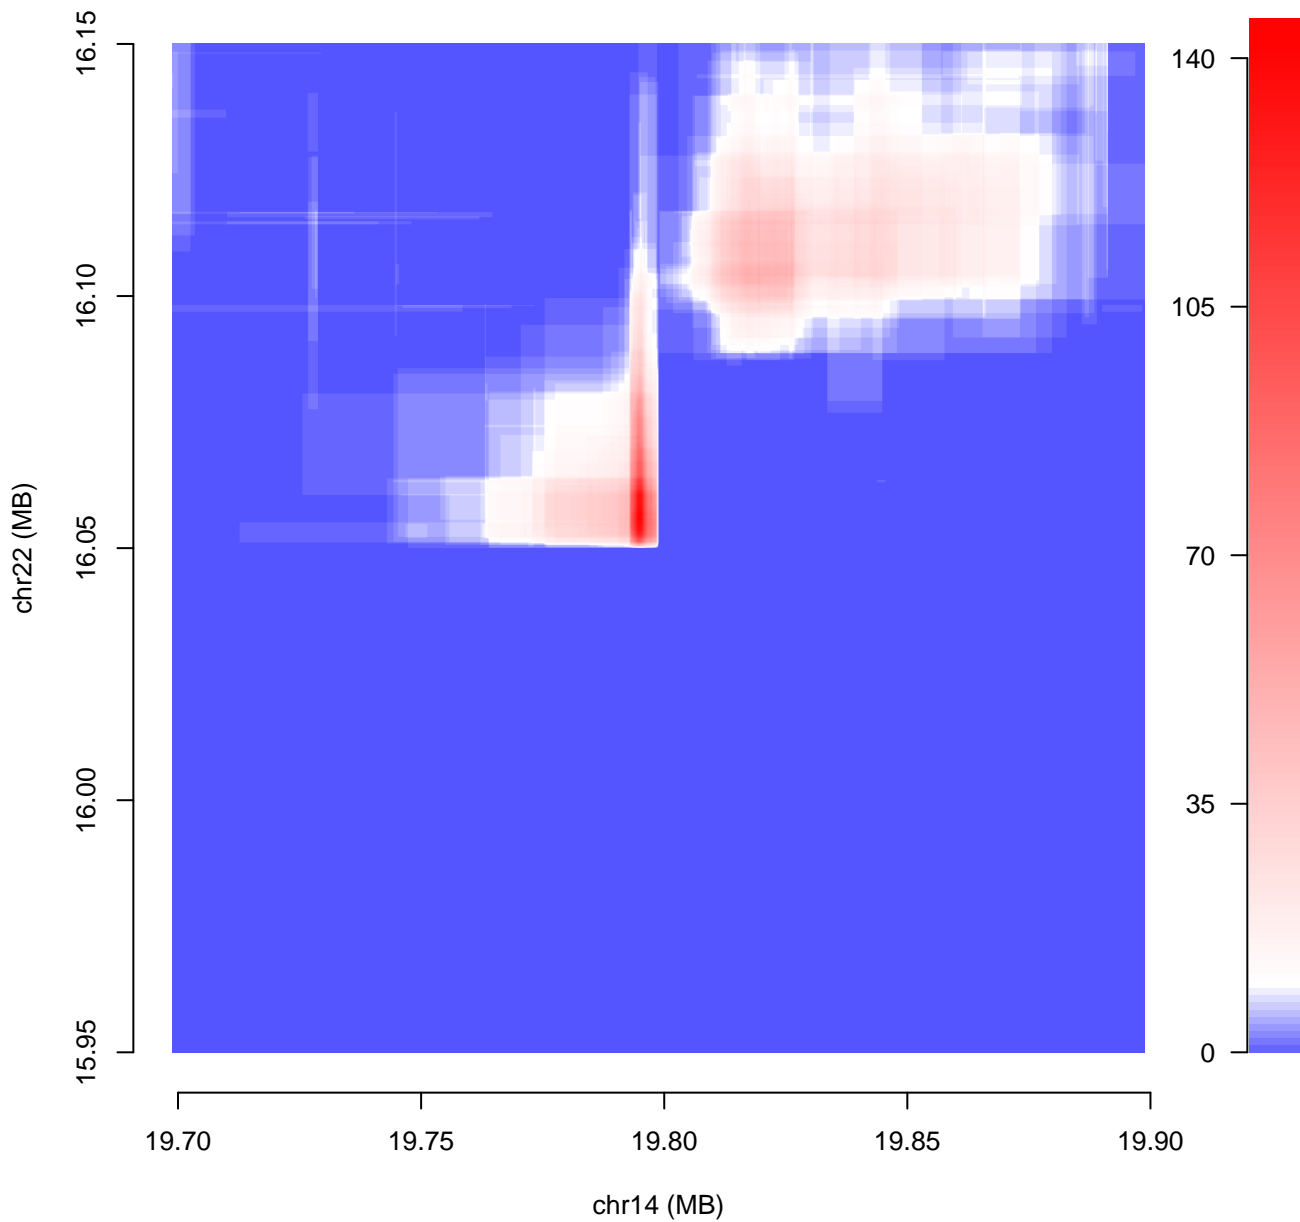

K562 chr14:19,798,817::chr14:19,792,758+-

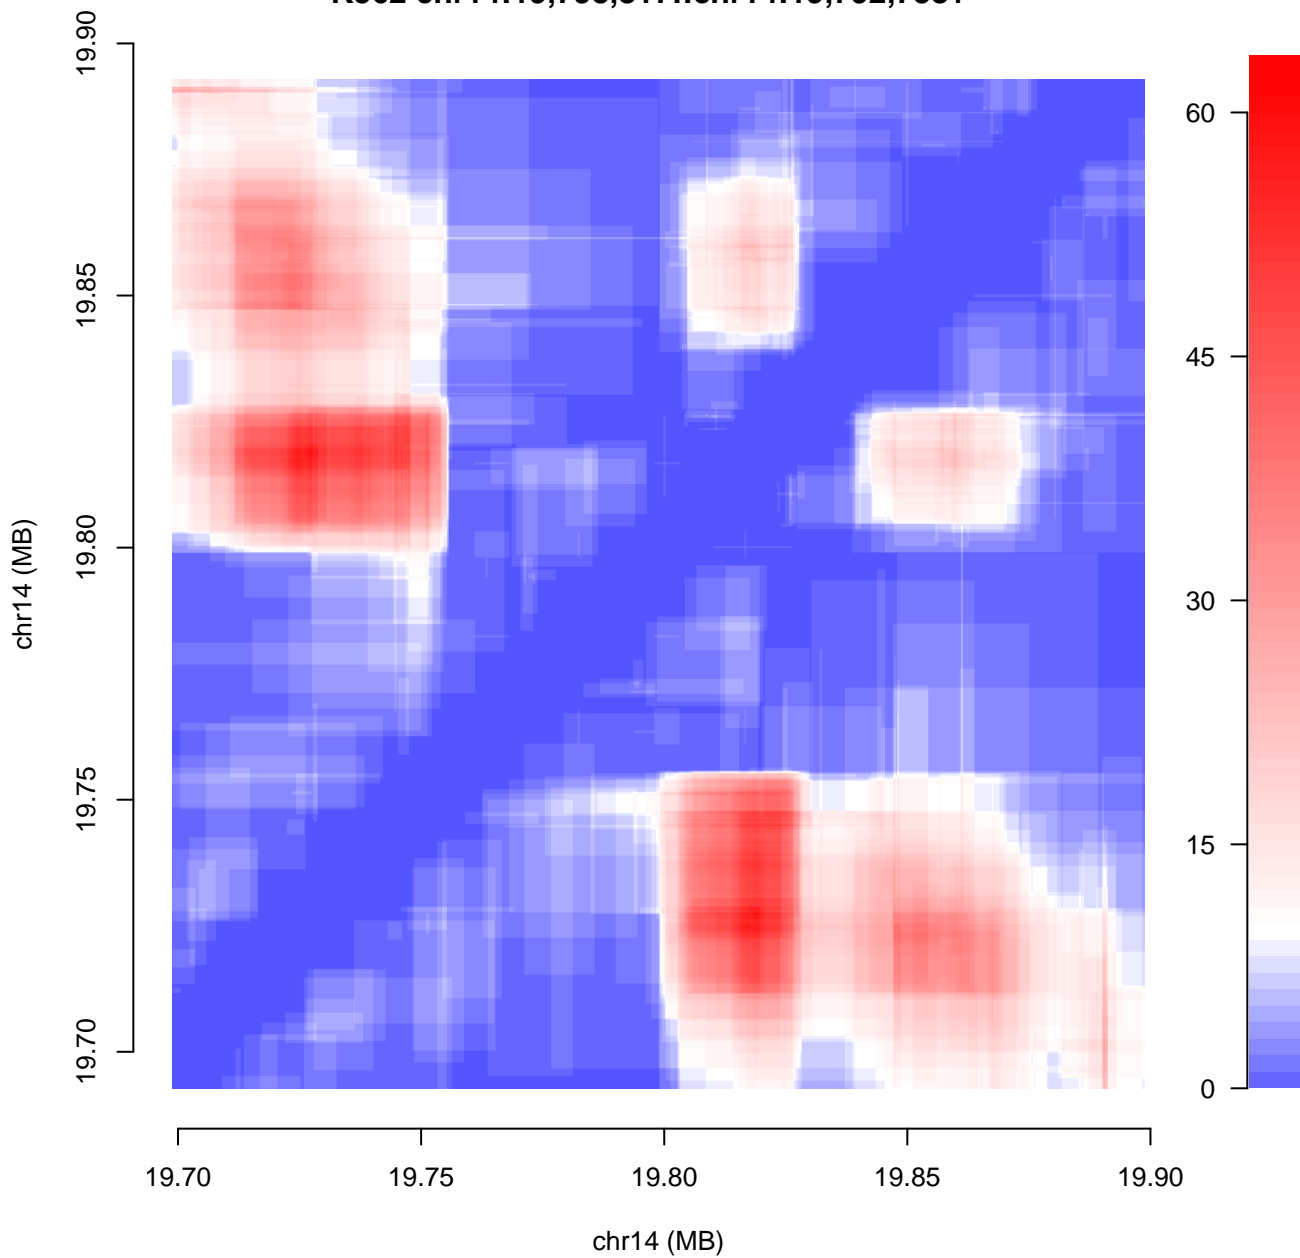

K562 chr14:19,792,758::chr22:16,081,771-+

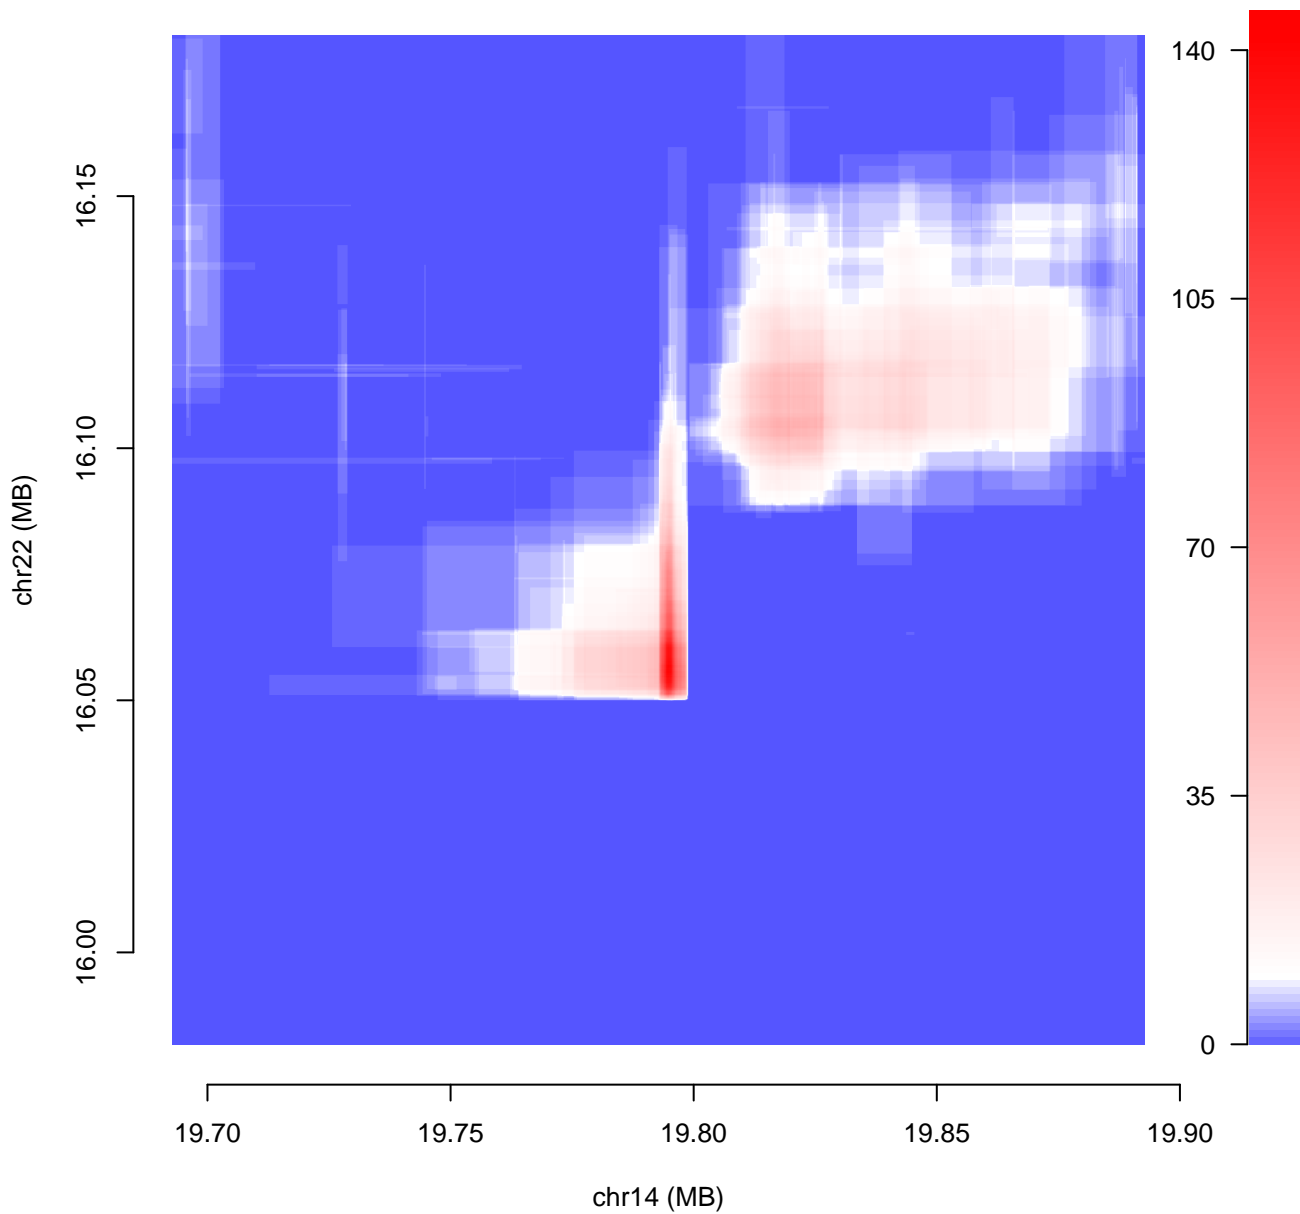

Supplement: Supplemental_Data.zip [file event_473.pdf › event_473.pdf]

Barcode

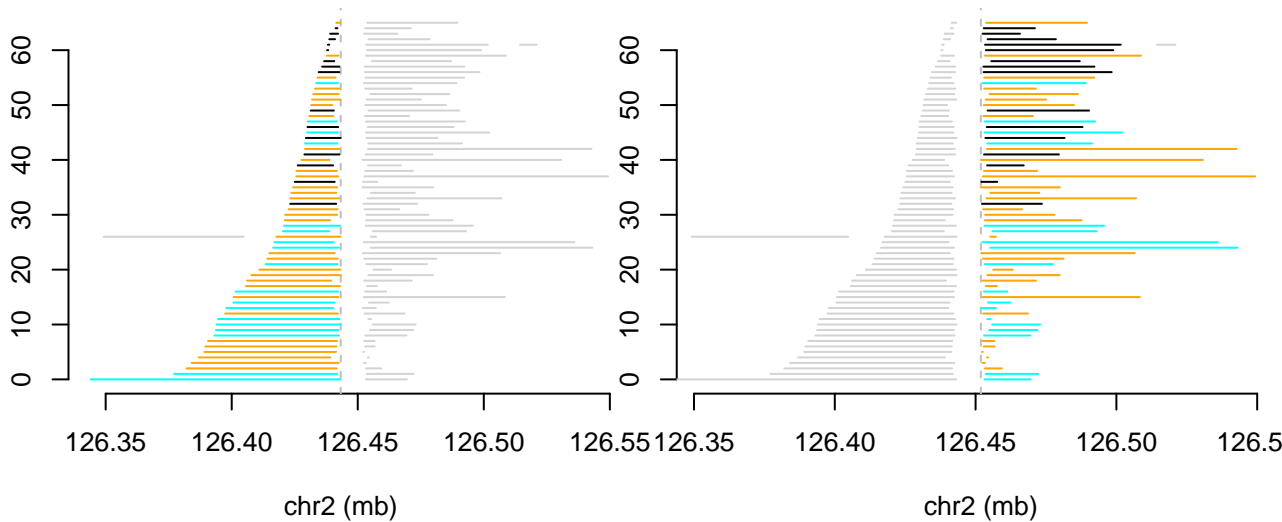

Copy number

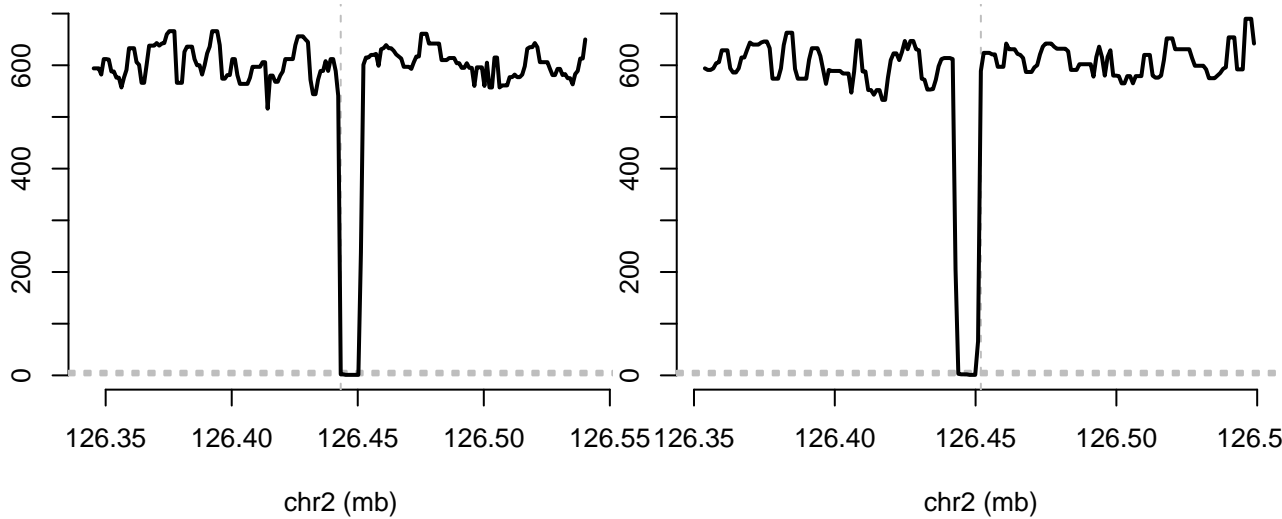

K562 chr2:126,443,251::chr2:126,451,881+-

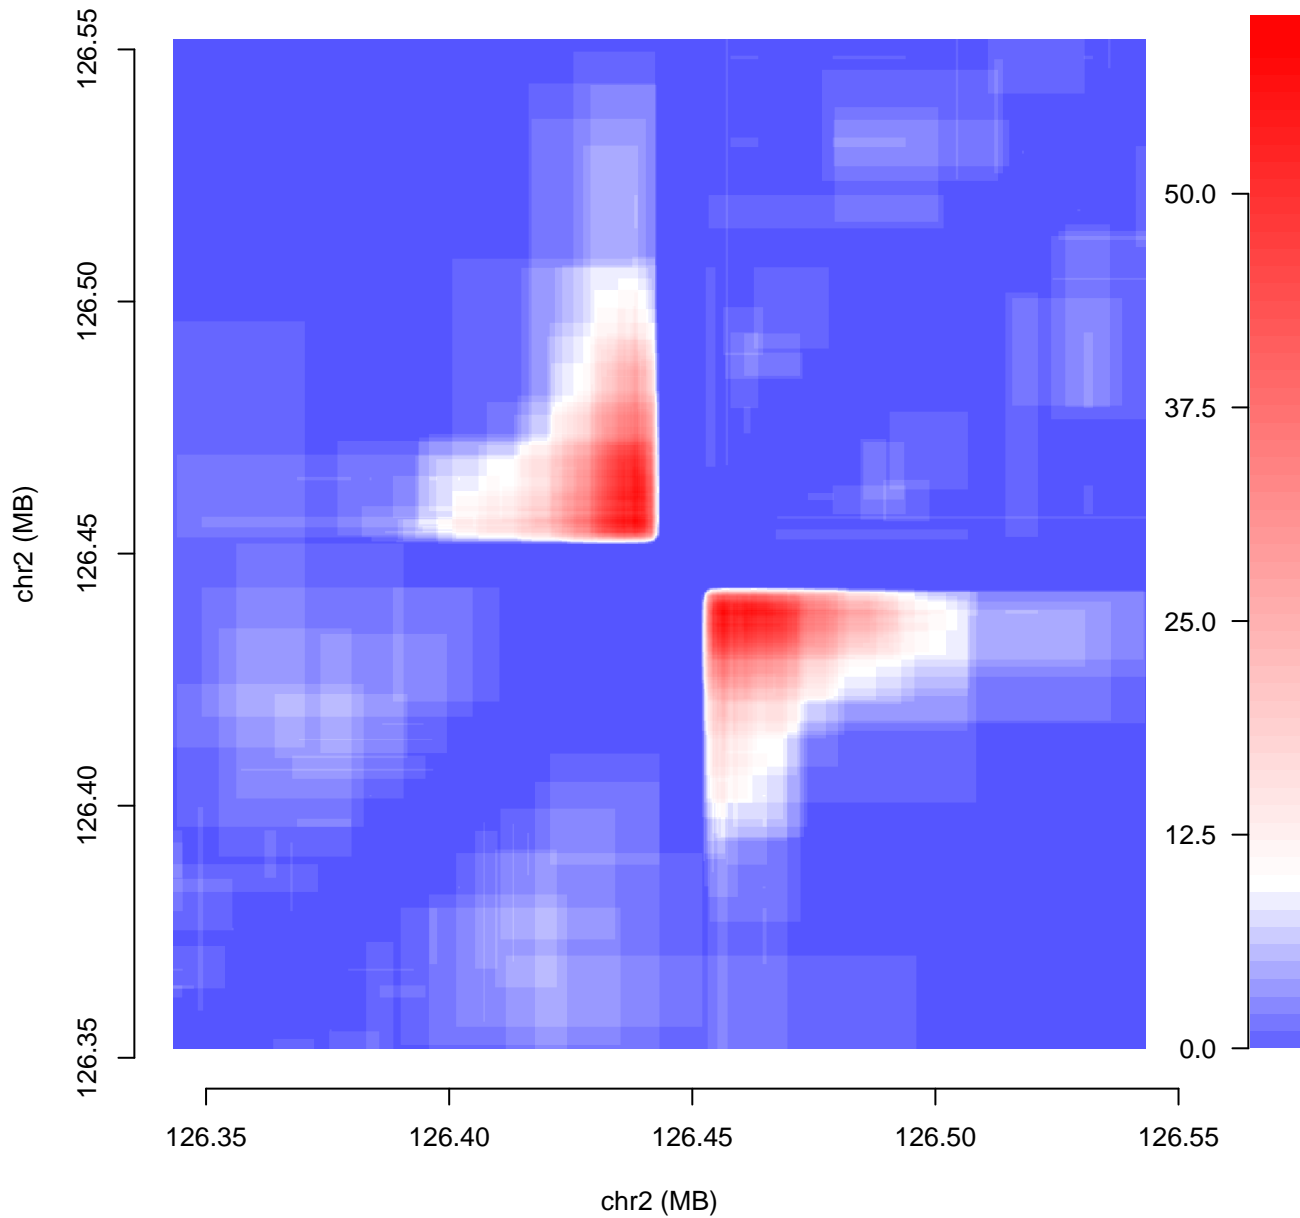

Supplement: Supplemental_Data.zip [file event_474.pdf › event_474.pdf]

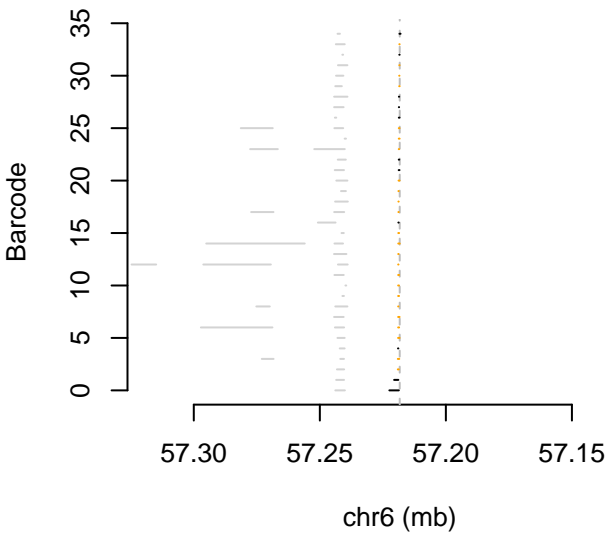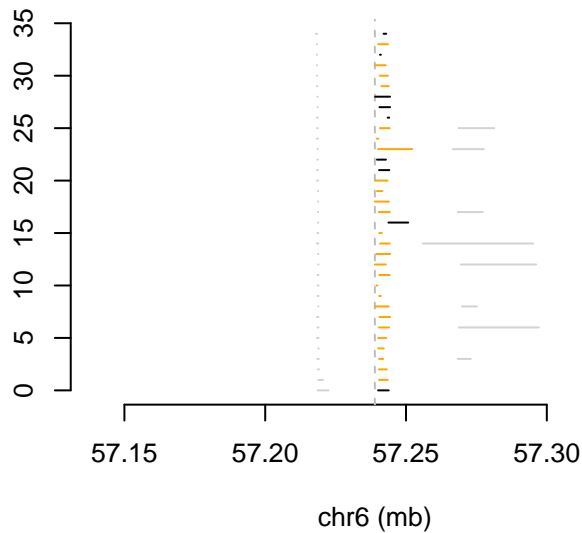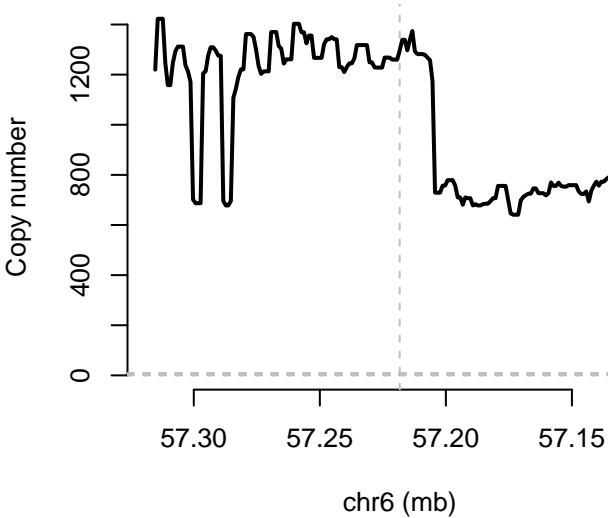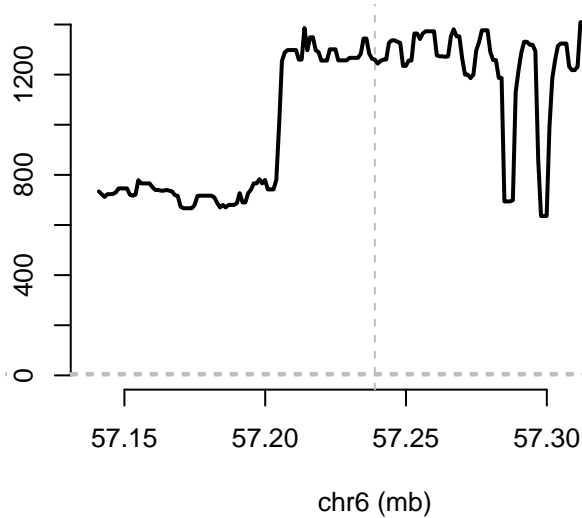

K562 chr6:57,238,938::chr6:57,218,299--

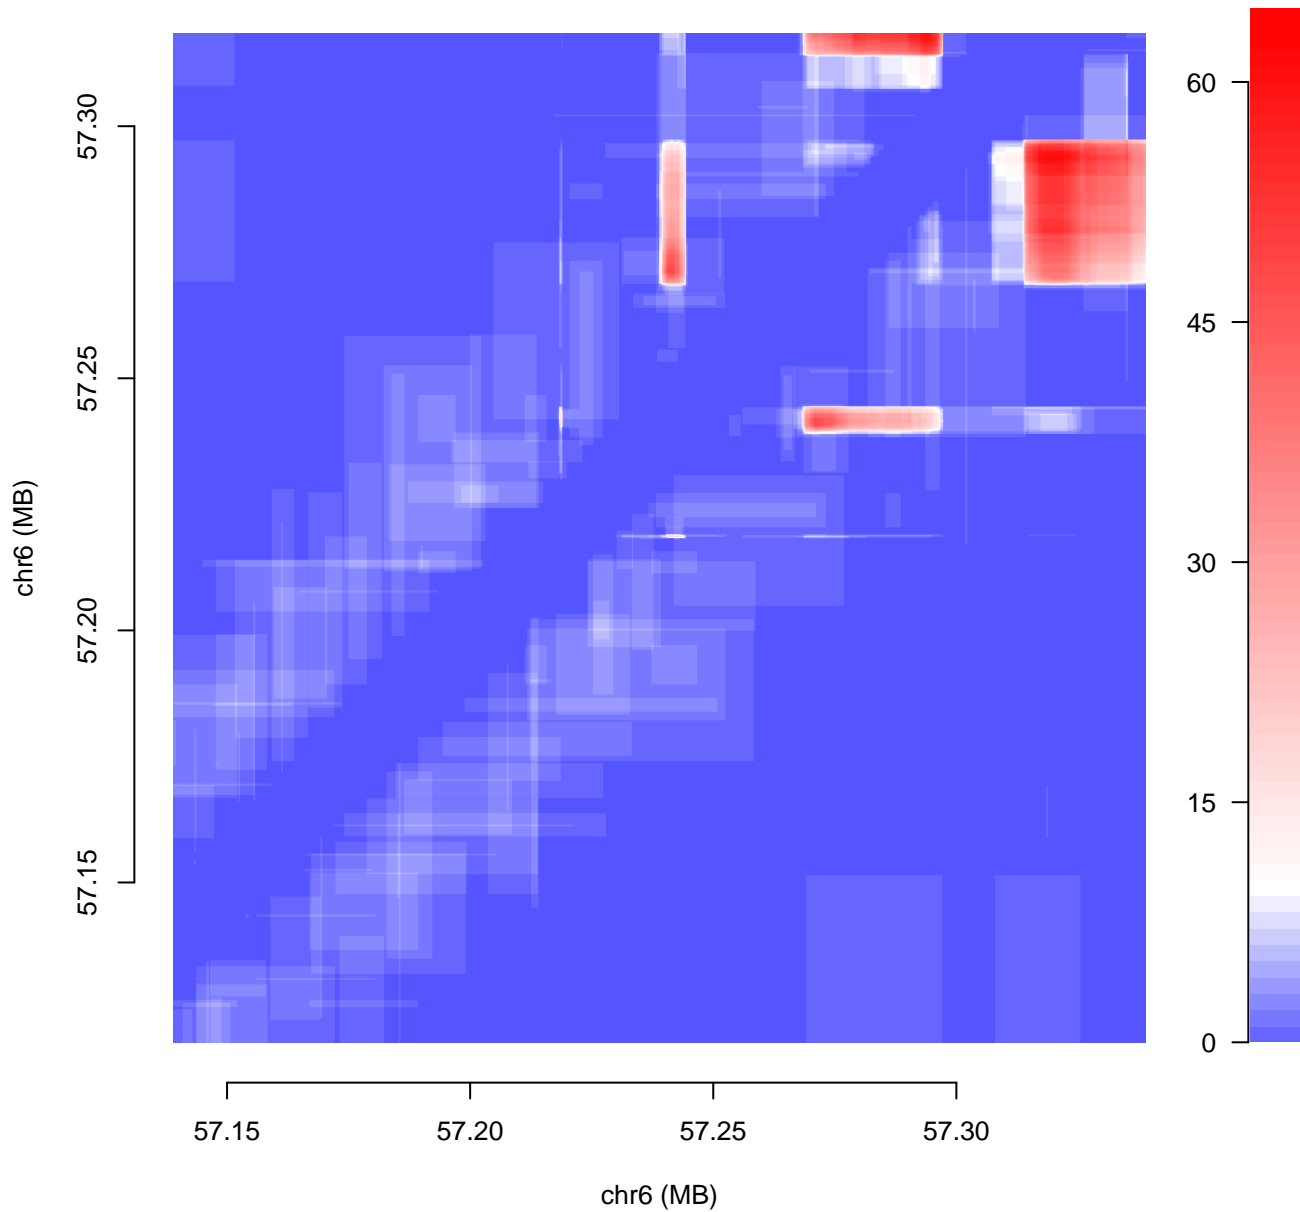

Supplement: Supplemental_Data.zip [file event_475.pdf › event_475.pdf]

Barcode

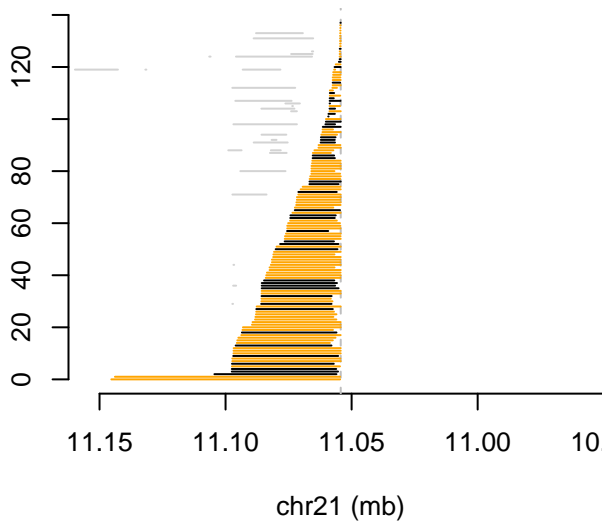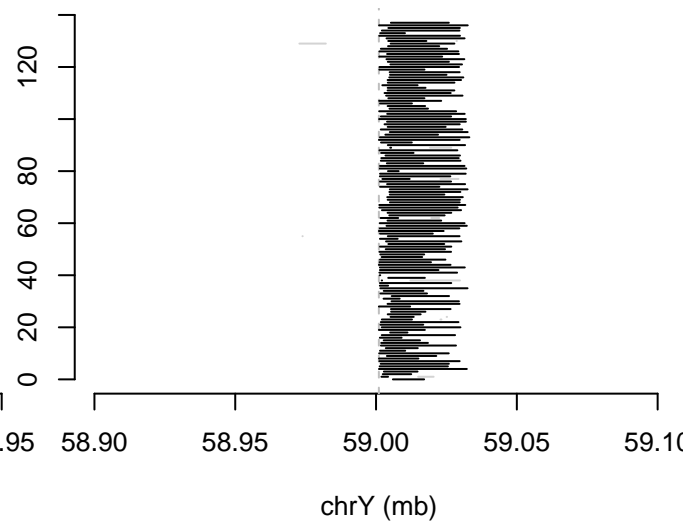

Copy number

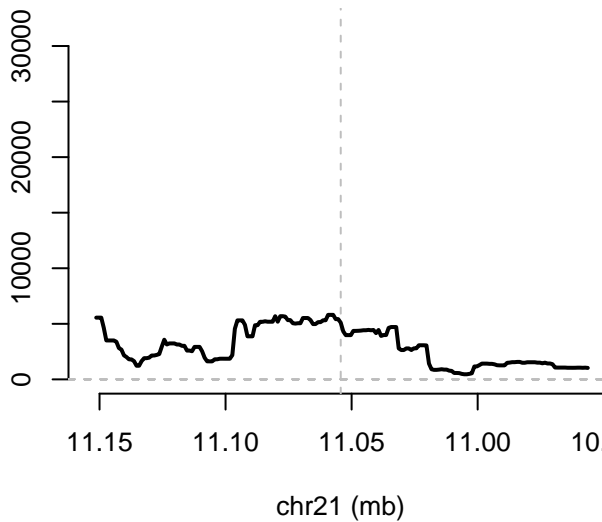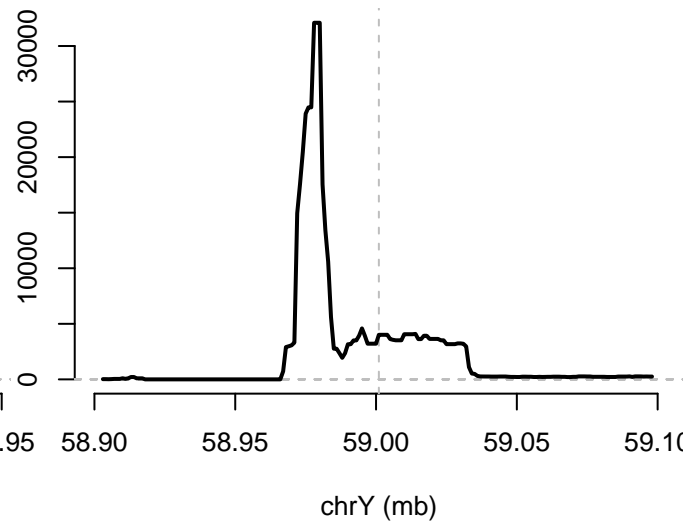

K562 chr21:11,054,313::chrY:59,001,009--

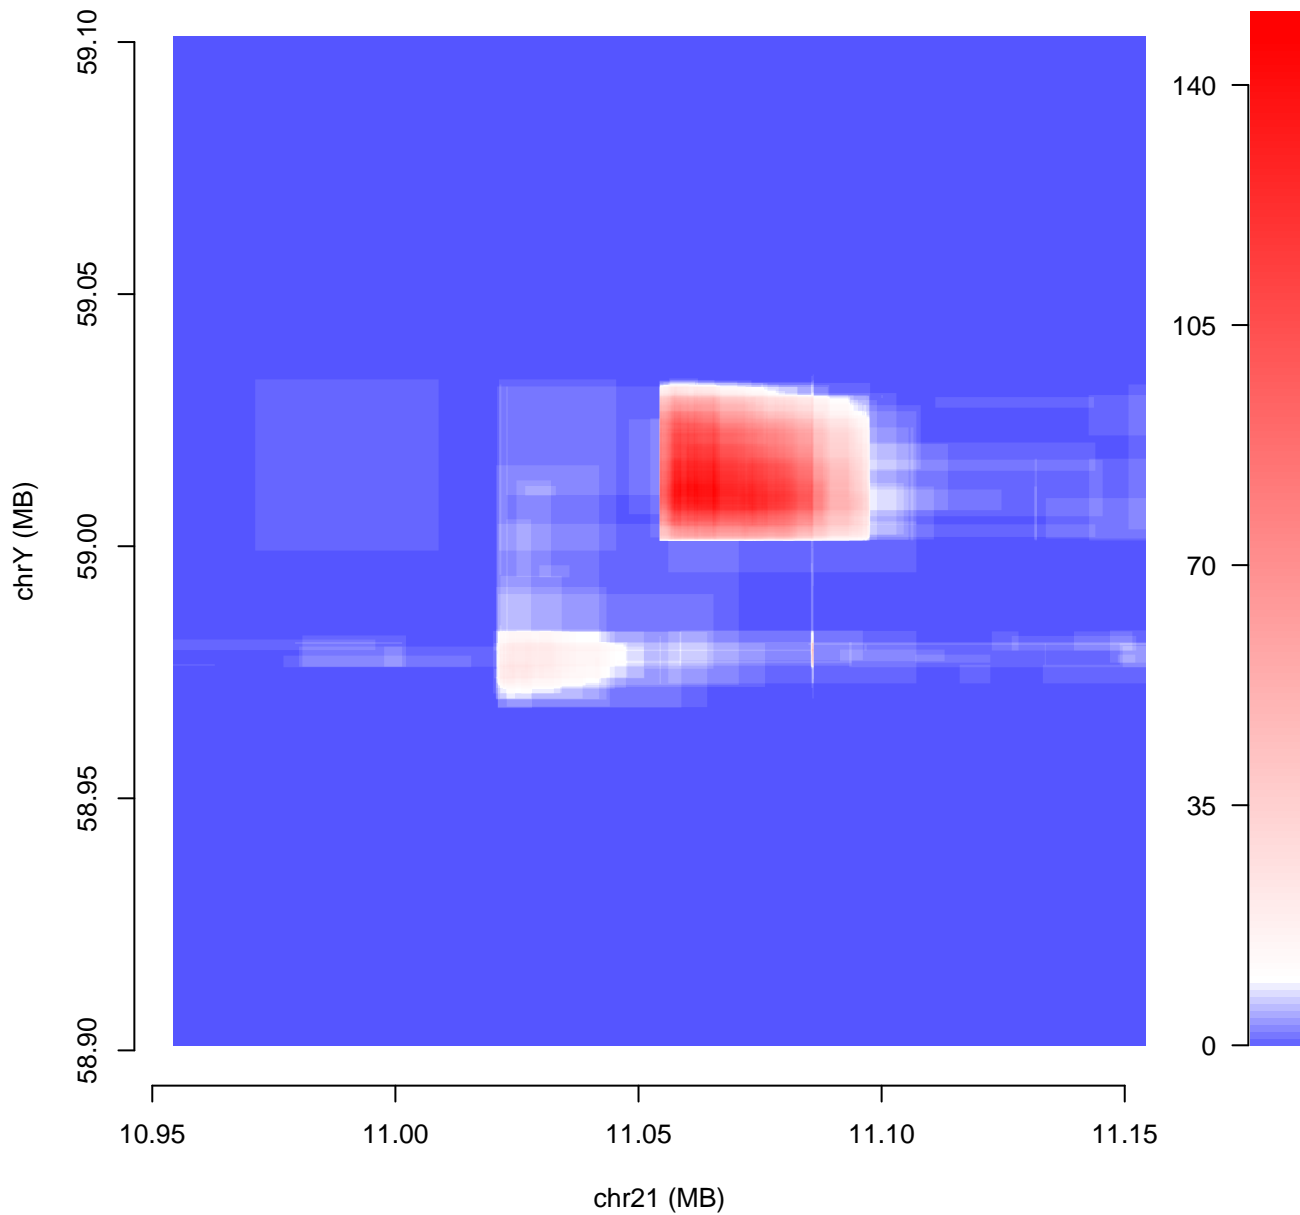

Supplement: Supplemental_Data.zip [file event_476.pdf › event_476.pdf]

Barcode

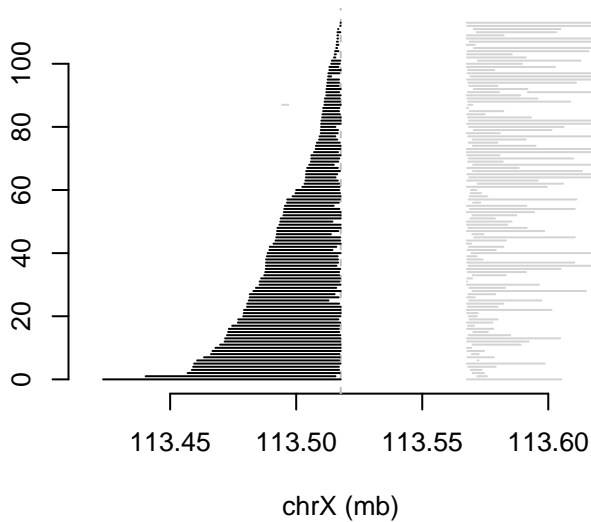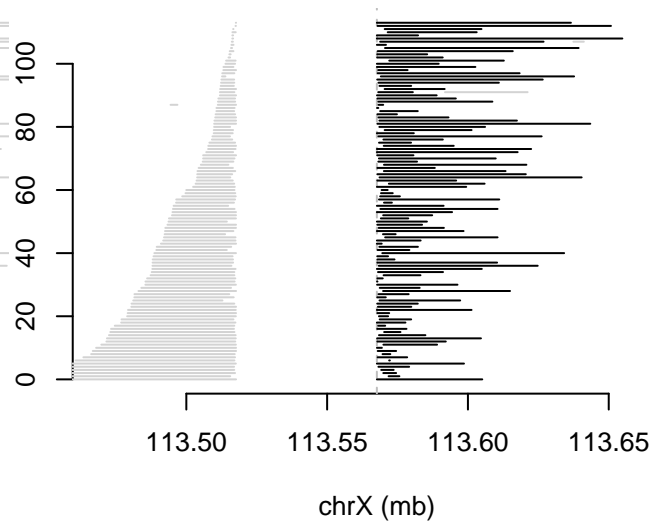

Copy number

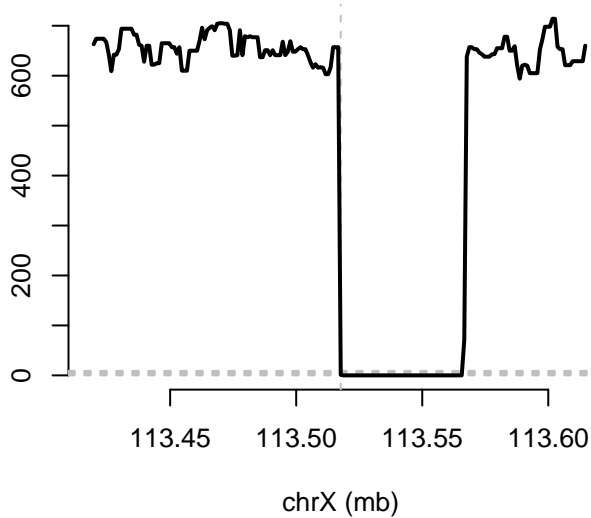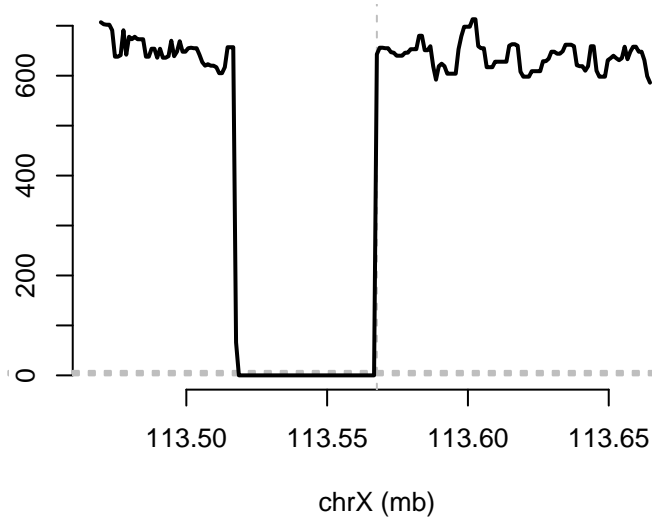

K562 chrX:113,567,667::chrX:113,517,669-+

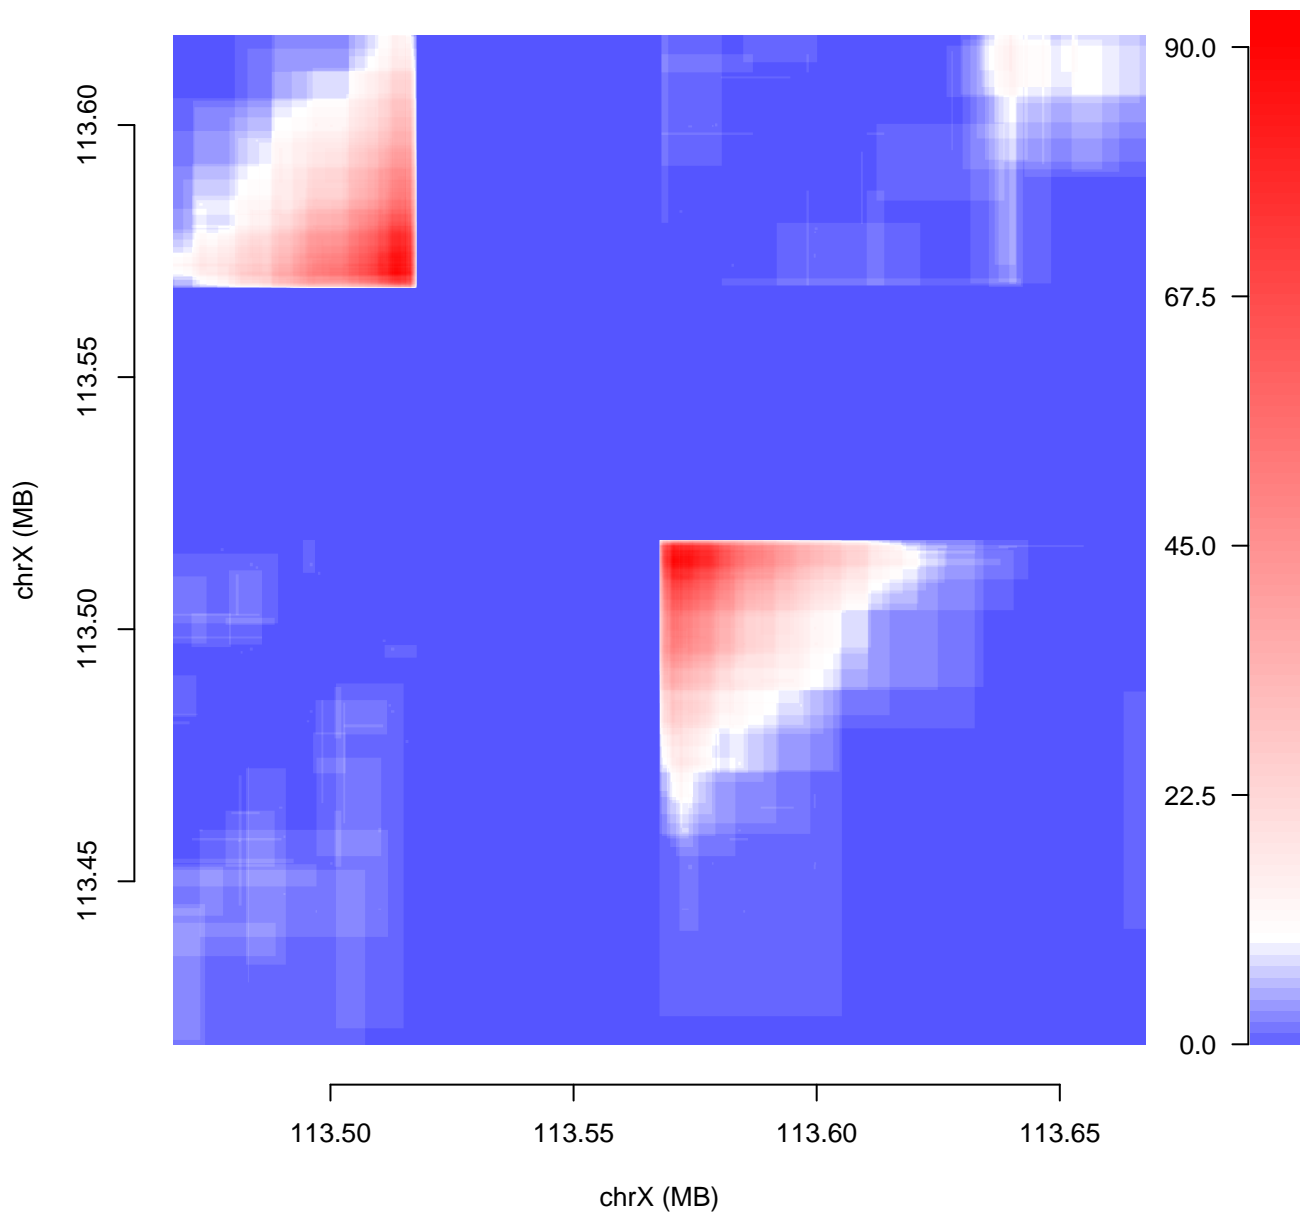

Supplement: Supplemental_Data.zip [file event_477.pdf › event_477.pdf]

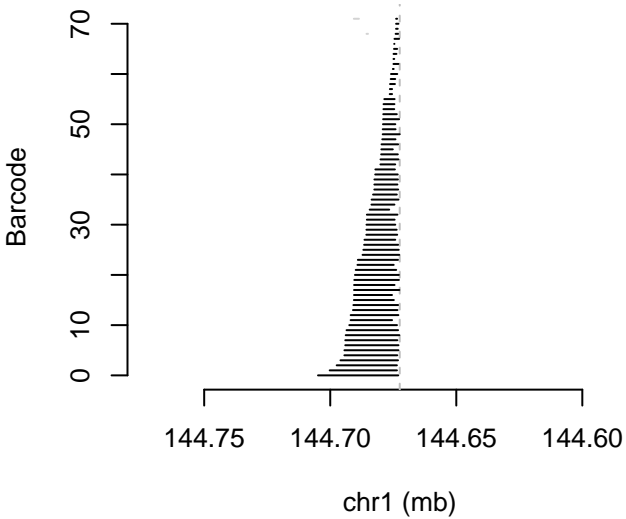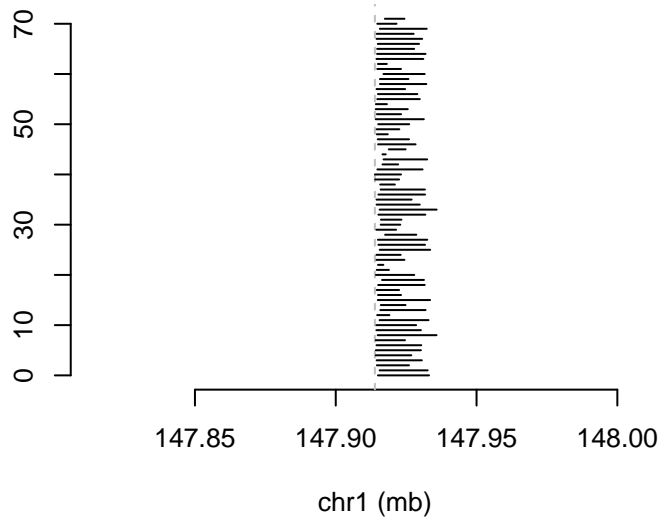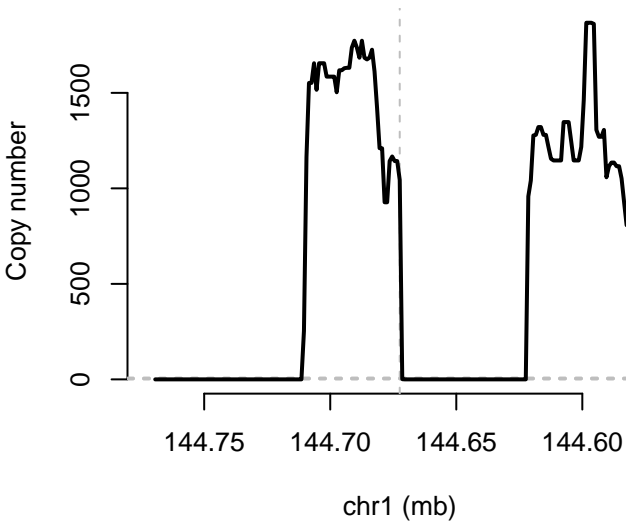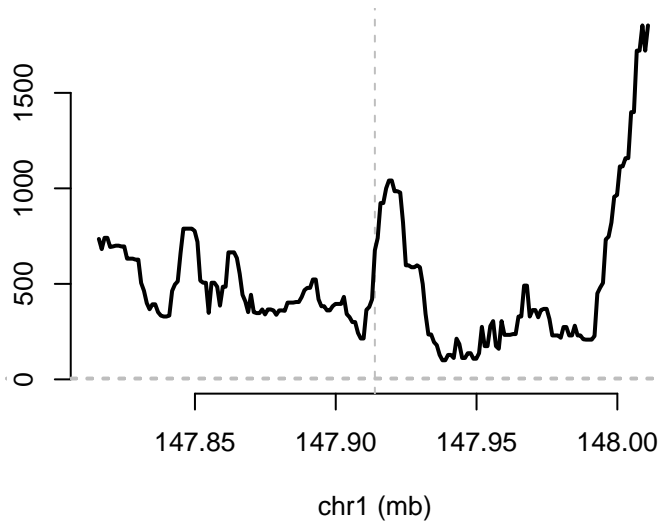

K562 chr1:144,672,429::chr1:147,913,892--

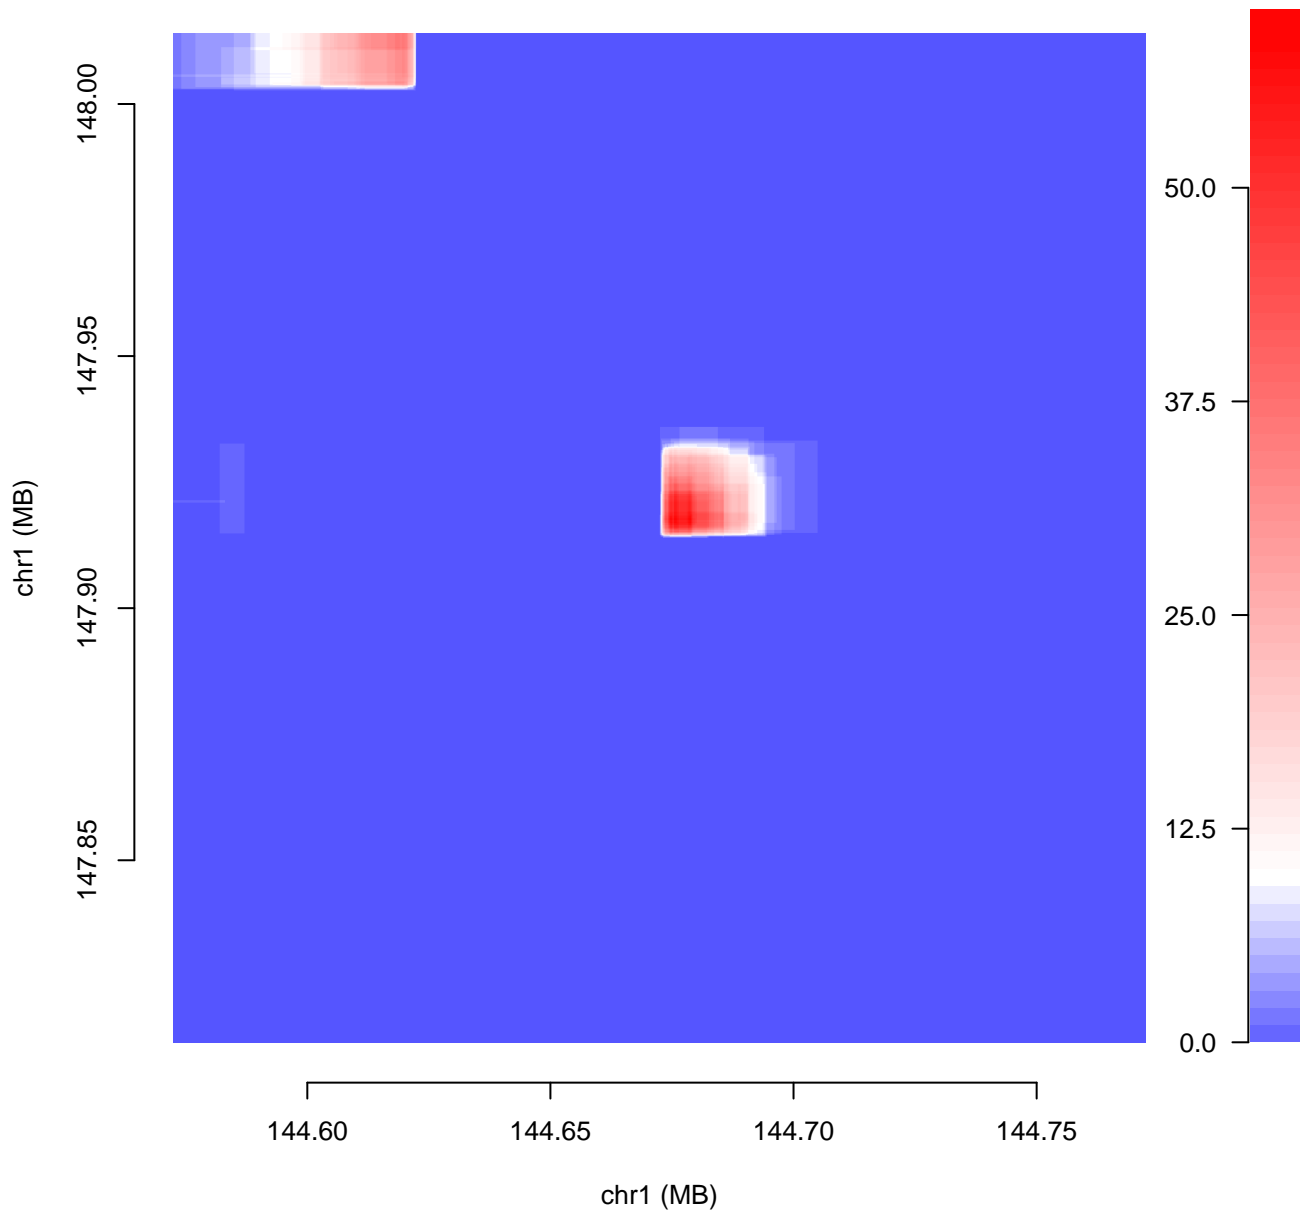

Supplement: Supplemental_Data.zip [file event_478.pdf › event_478.pdf]

Barcode

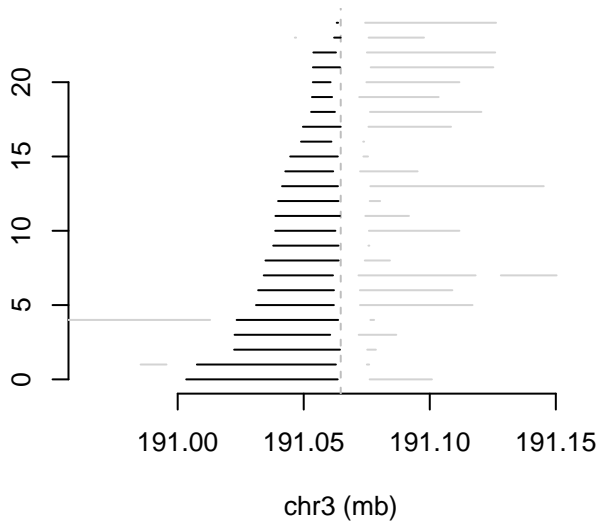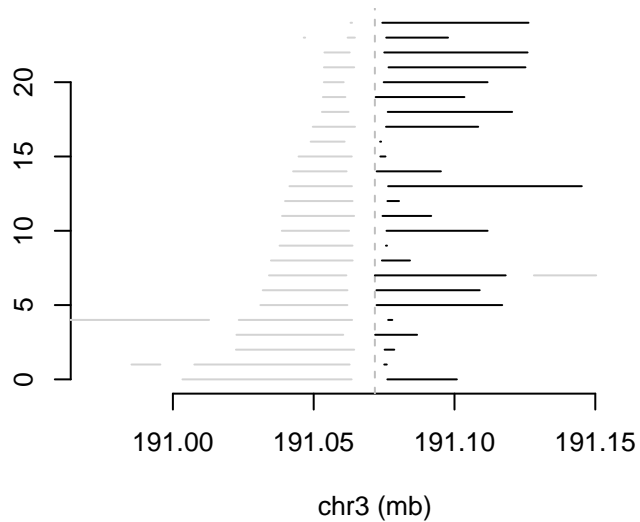

Copy number

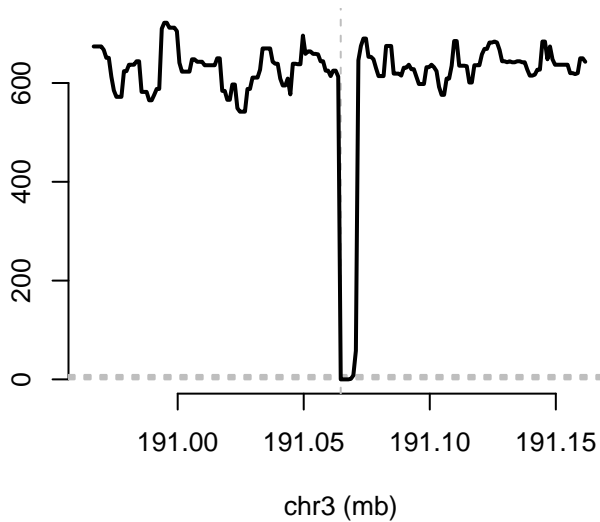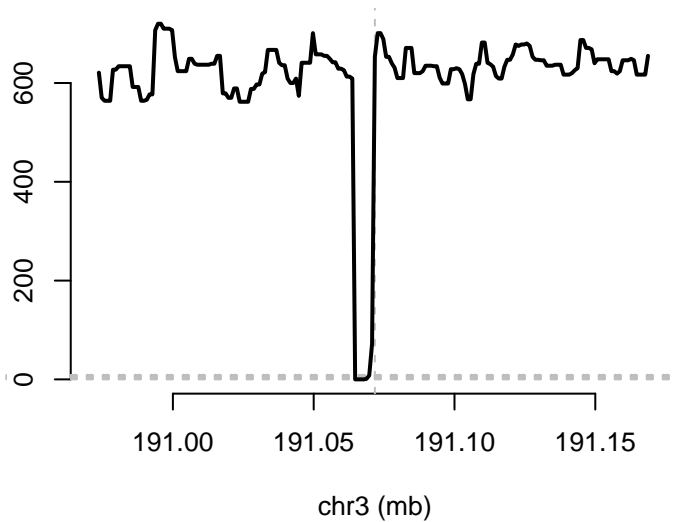

K562 chr3:191,064,685::chr3:191,071,729+-

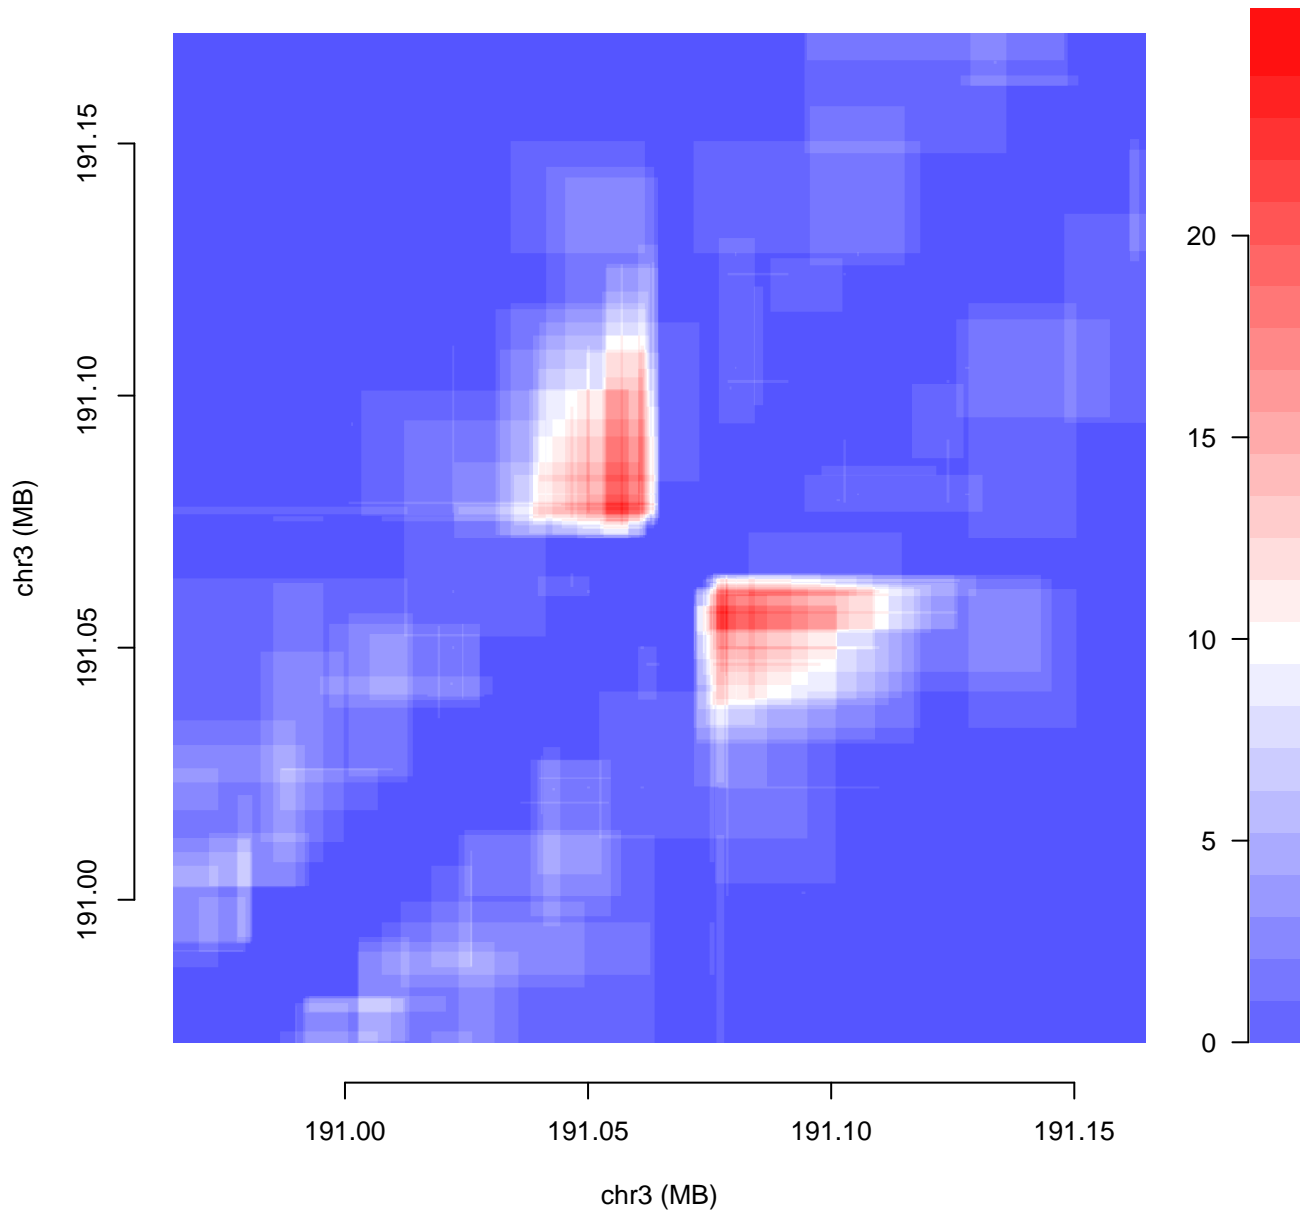

Supplement: Supplemental_Data.zip [file event_479.pdf › event_479.pdf]

Barcode

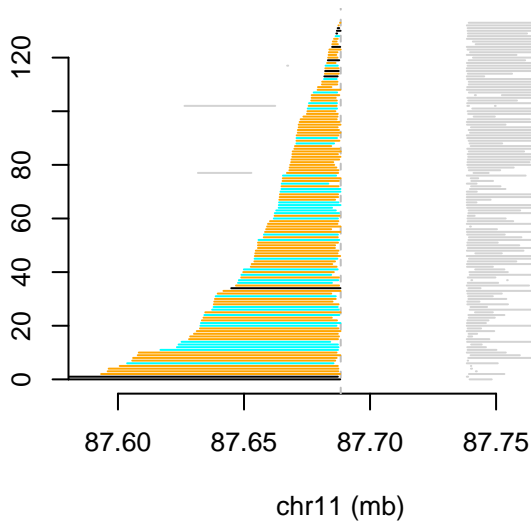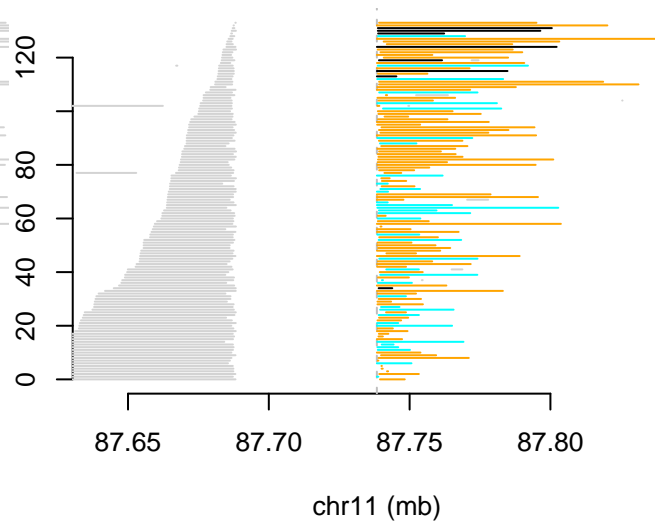

Copy number

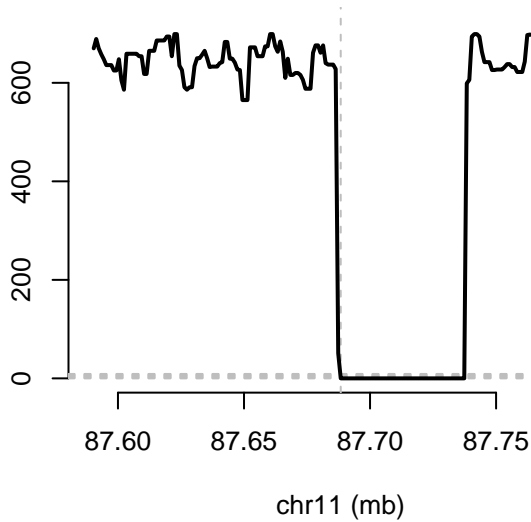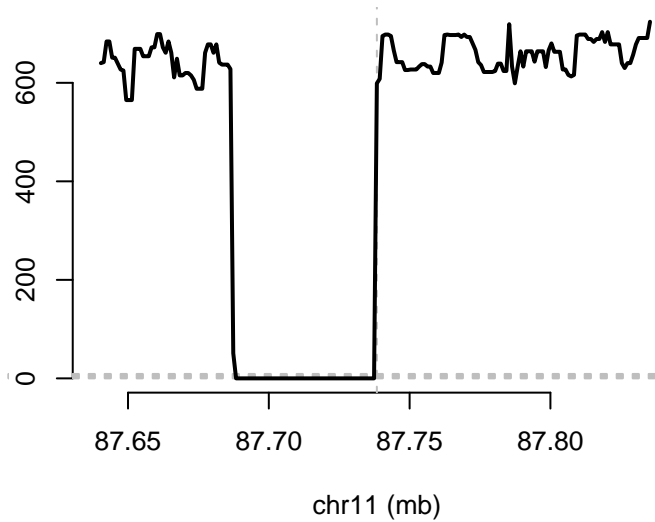

K562 chr11:87,688,375::chr11:87,738,376+-

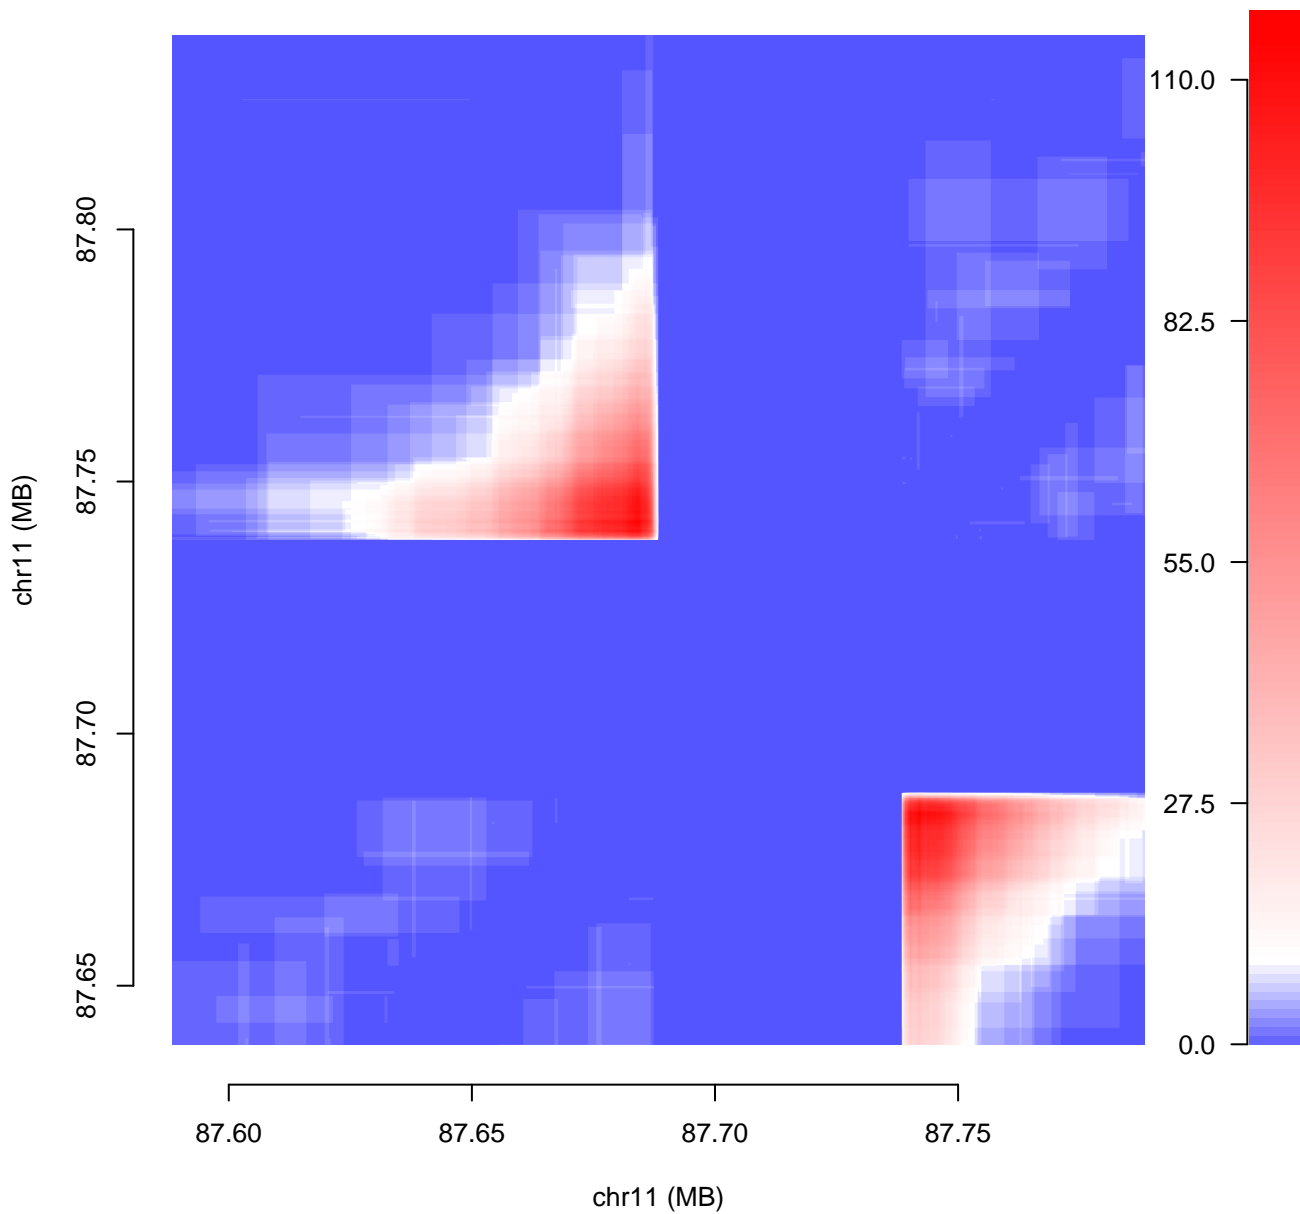

Supplement: Supplemental_Data.zip [file event_48.pdf › event_48.pdf]

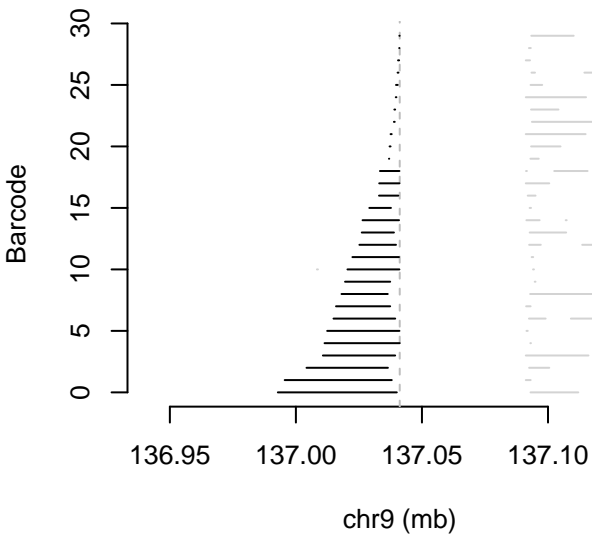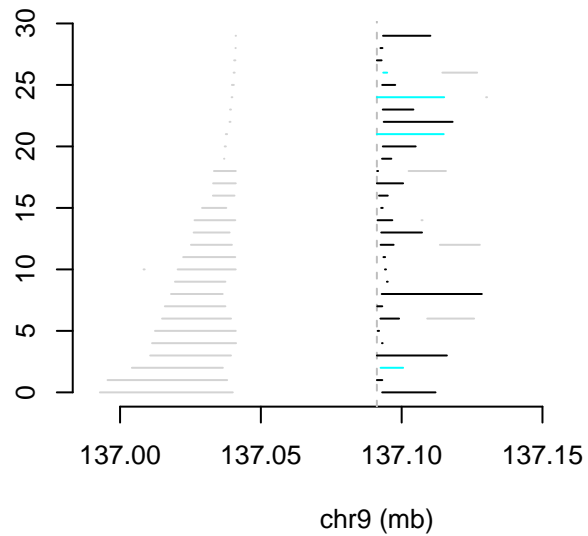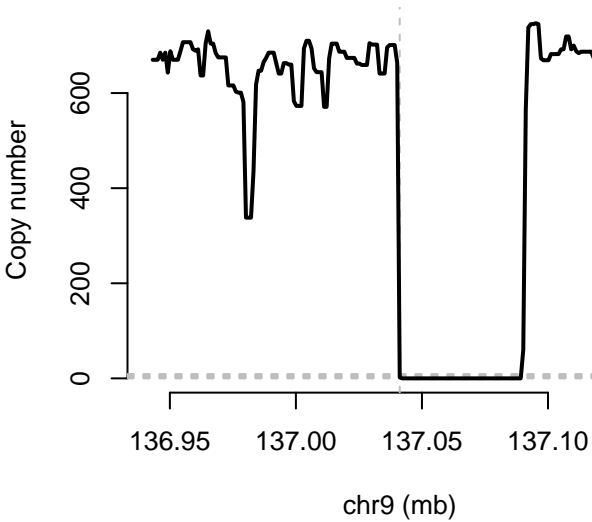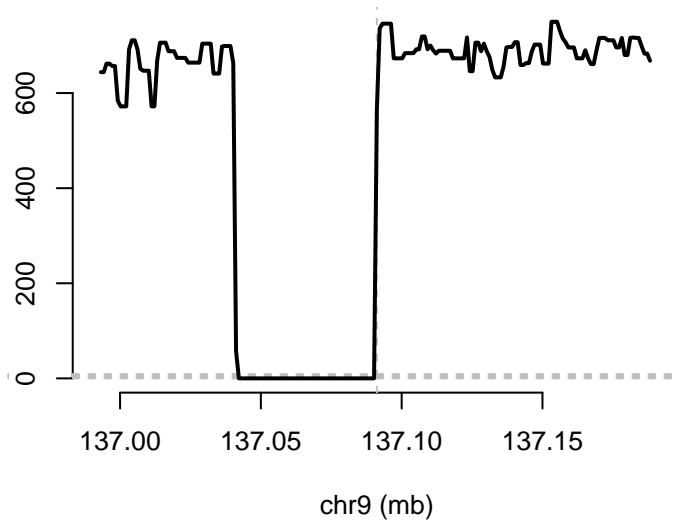

K562 chr9:137,041,194::chr9:137,091,192+-

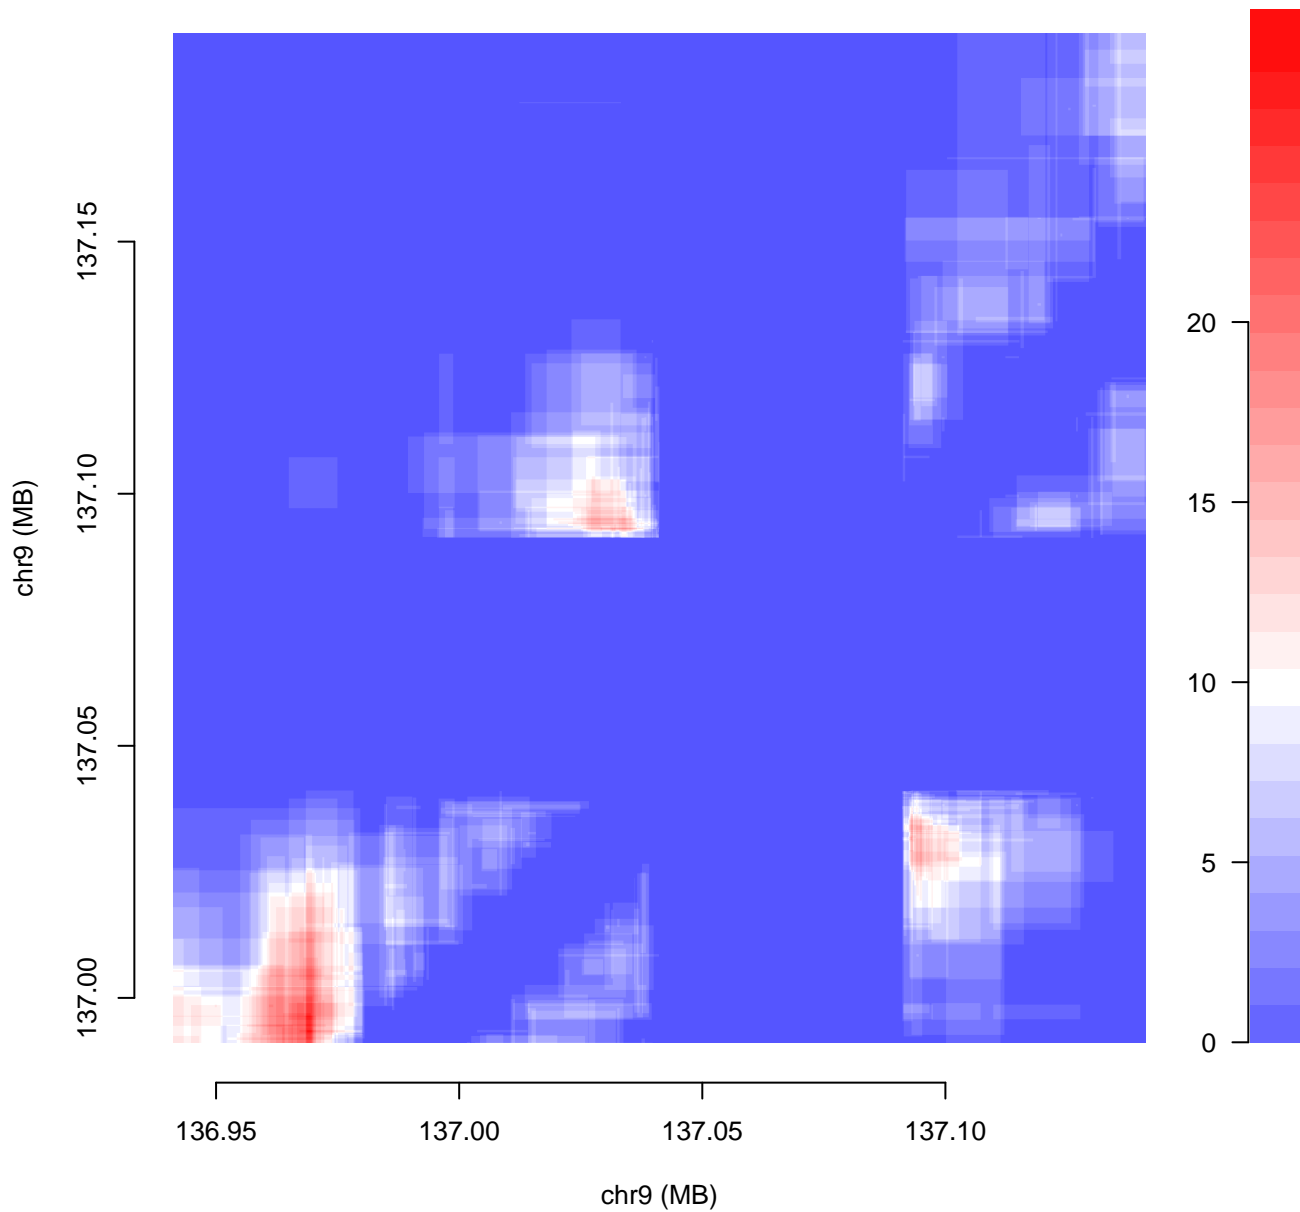

Supplement: Supplemental_Data.zip [file event_480.pdf › event_480.pdf]

Barcode

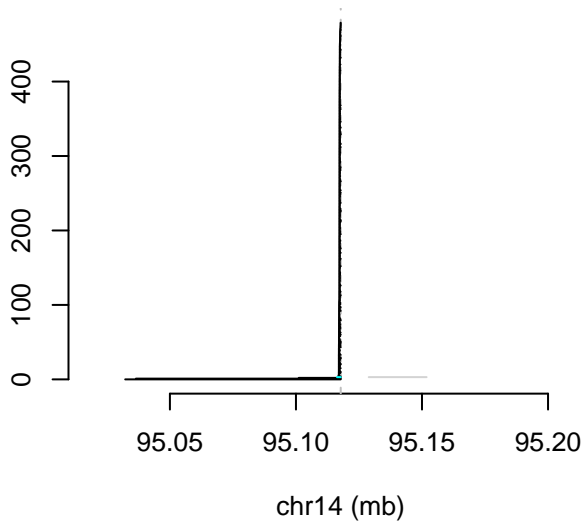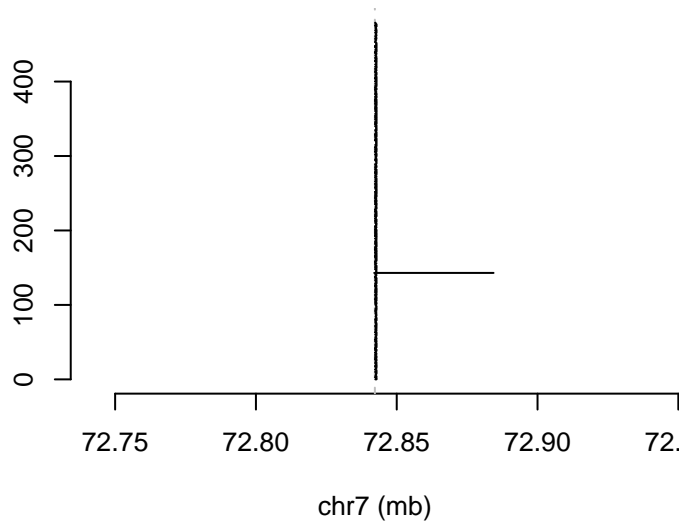

Copy number

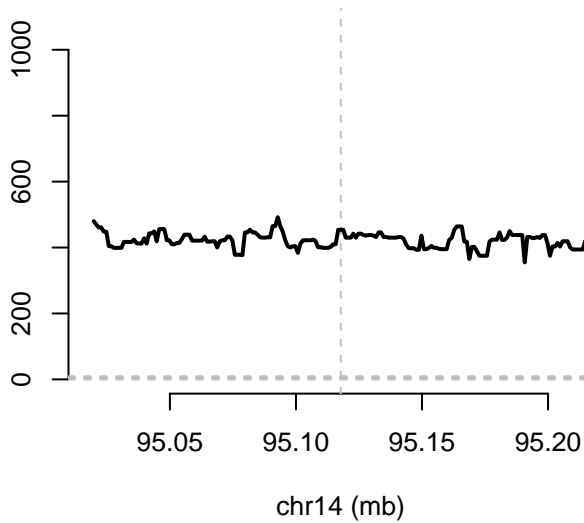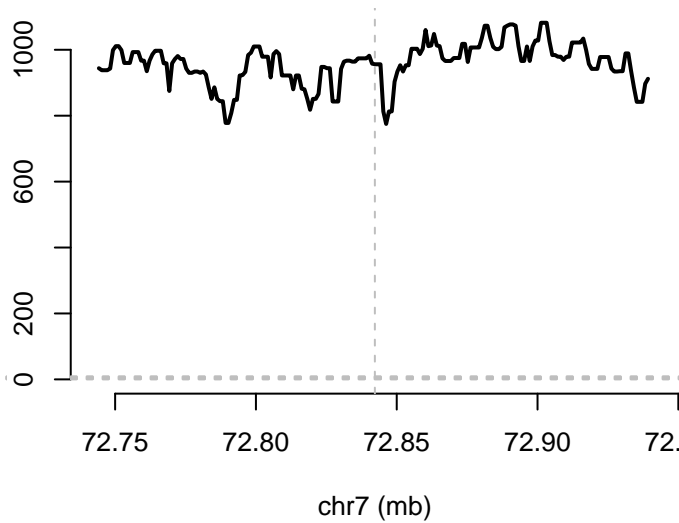

K562 chr14:95,117,768::chr7:72,842,233+-

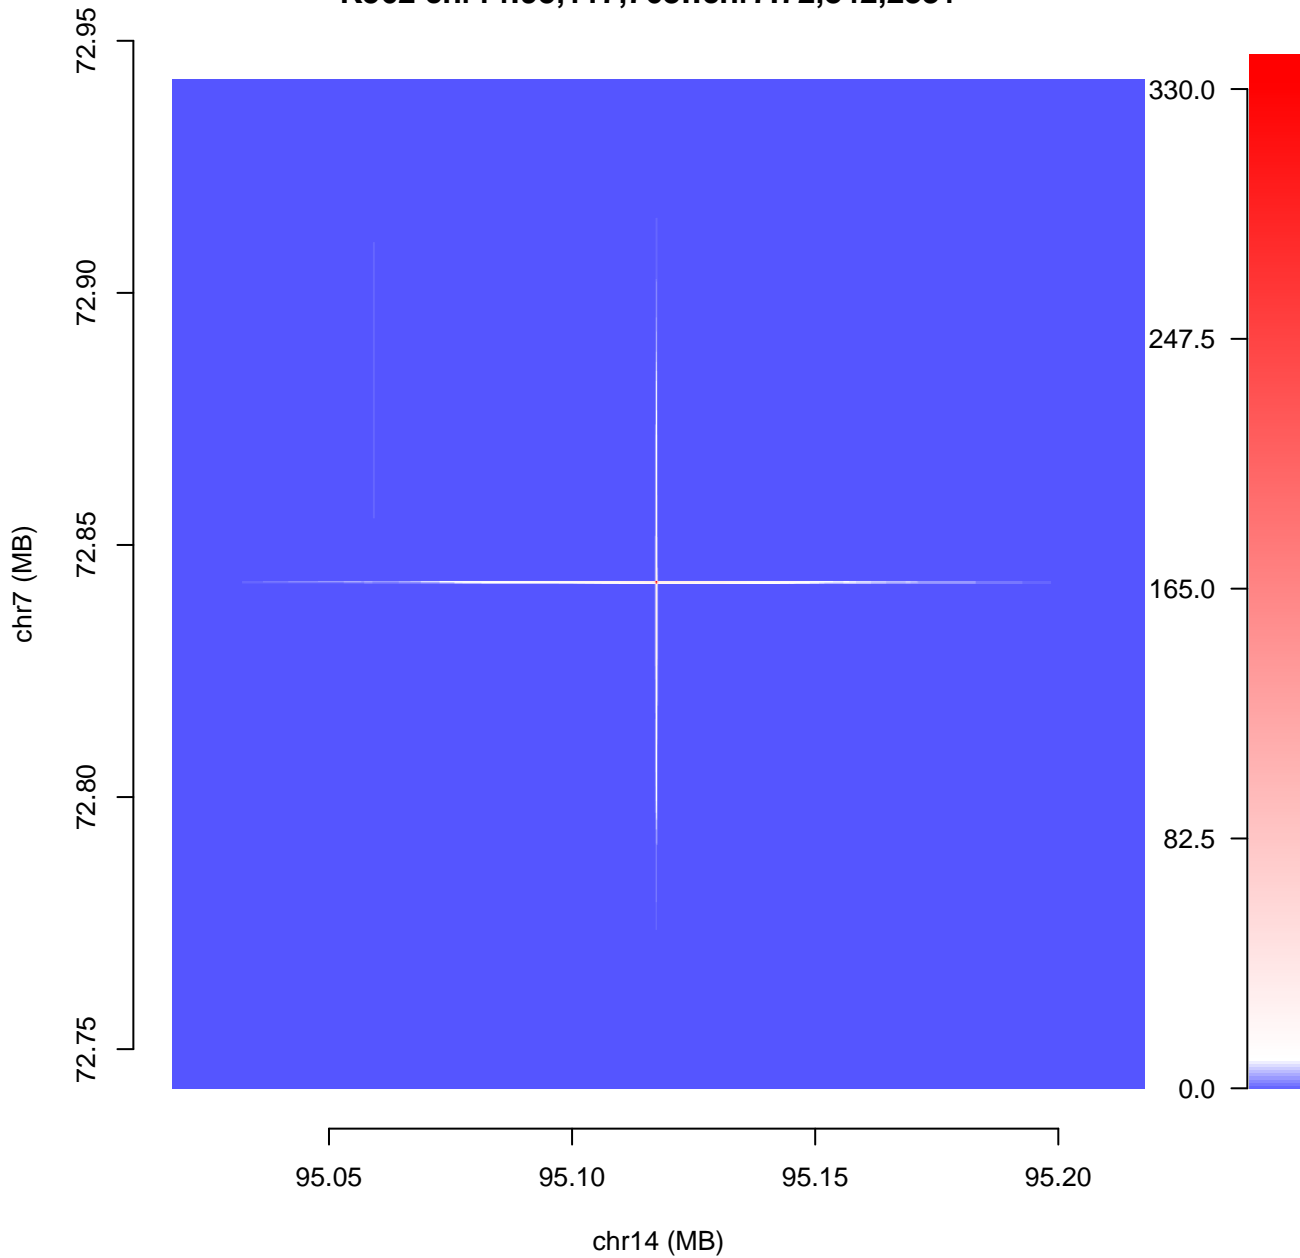

Supplement: Supplemental_Data.zip [file event_481.pdf › event_481.pdf]

Barcode

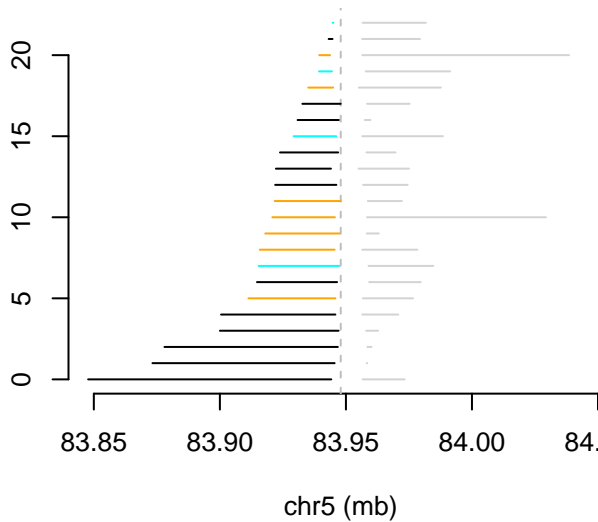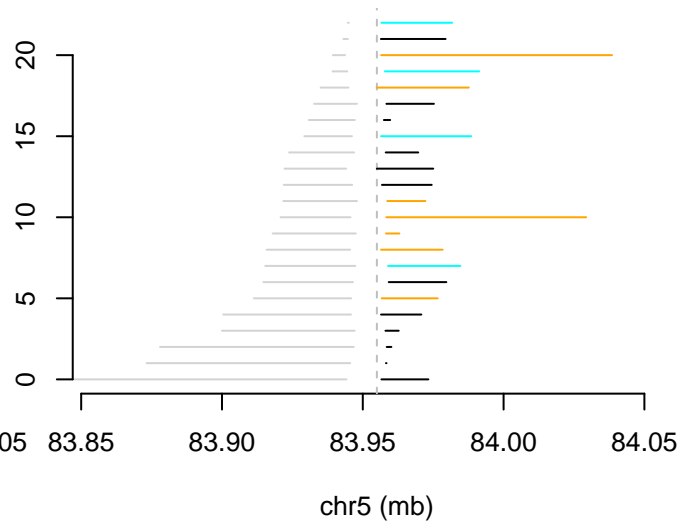

Copy number

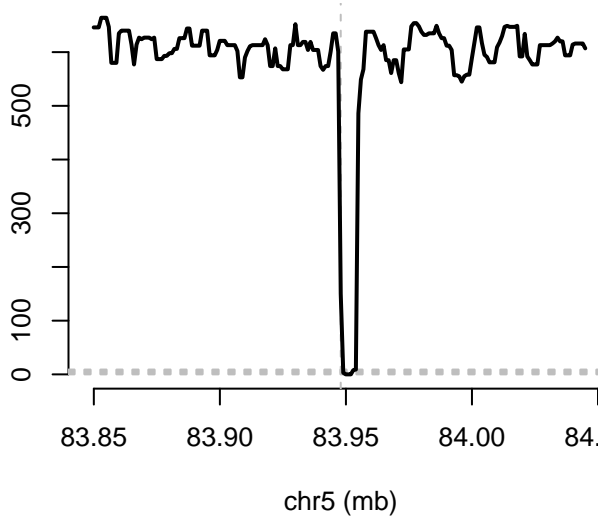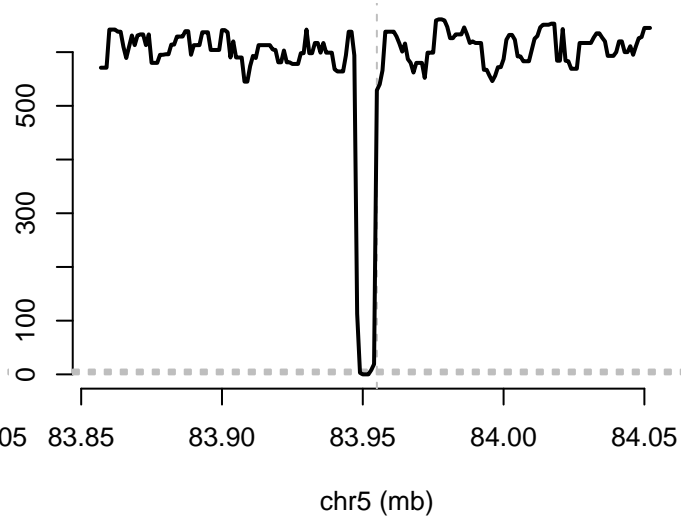

K562 chr5:83,947,946::chr5:83,955,005+-

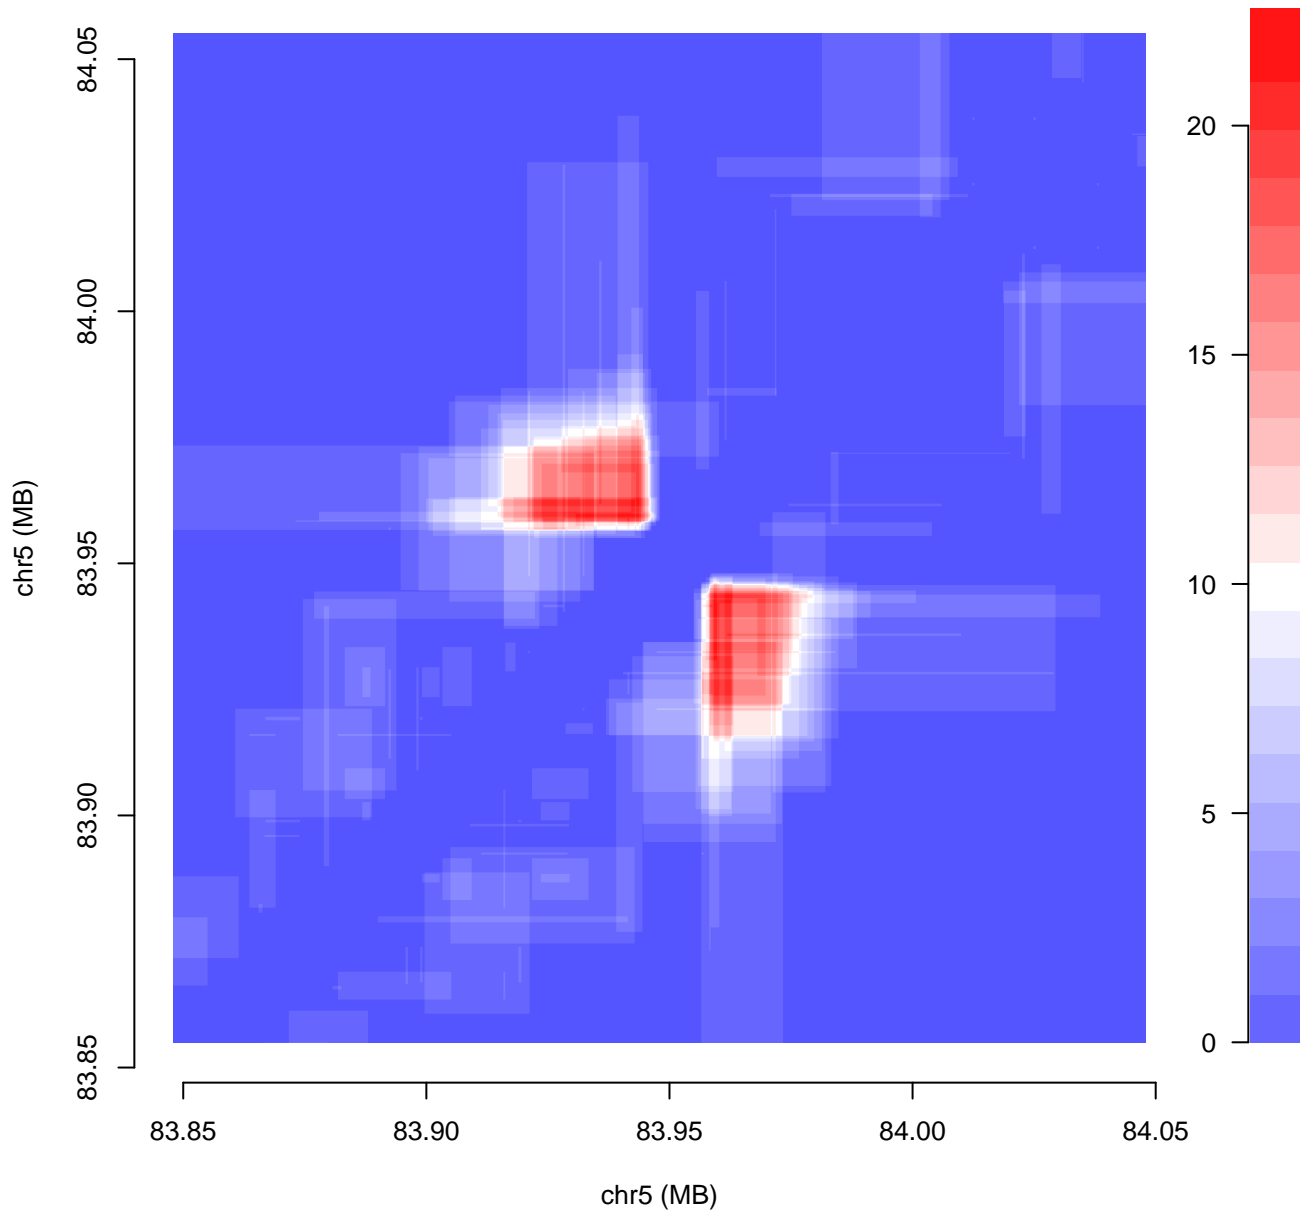

Supplement: Supplemental_Data.zip [file event_482.pdf › event_482.pdf]

Barcode

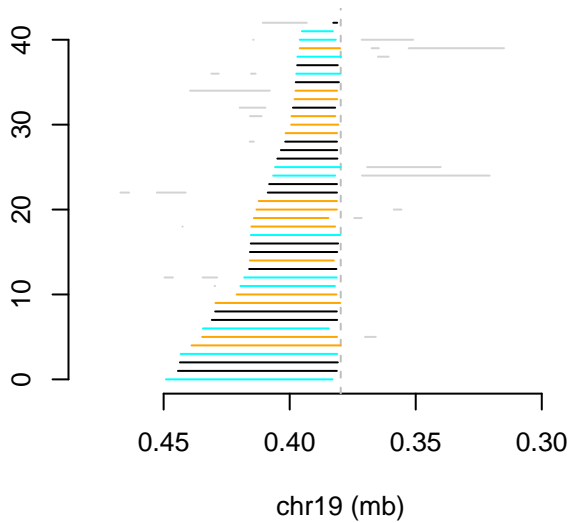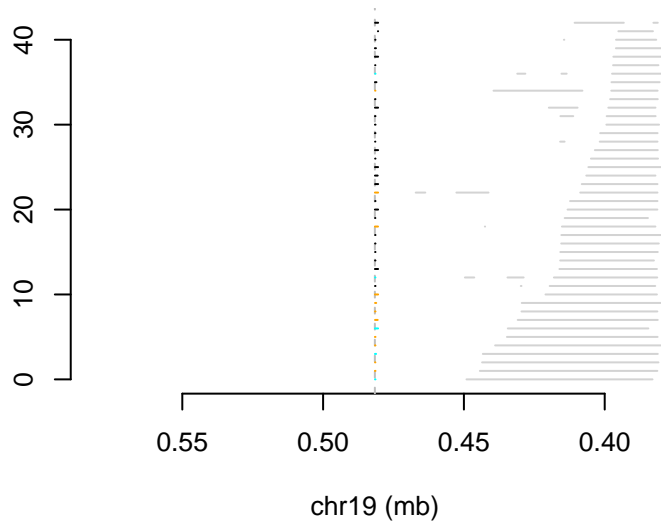

Copy number

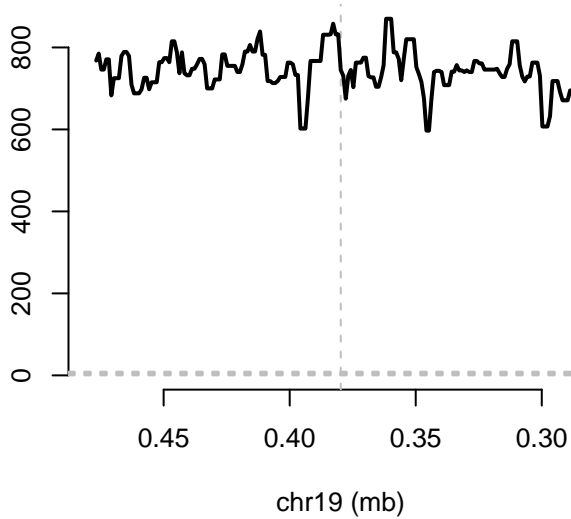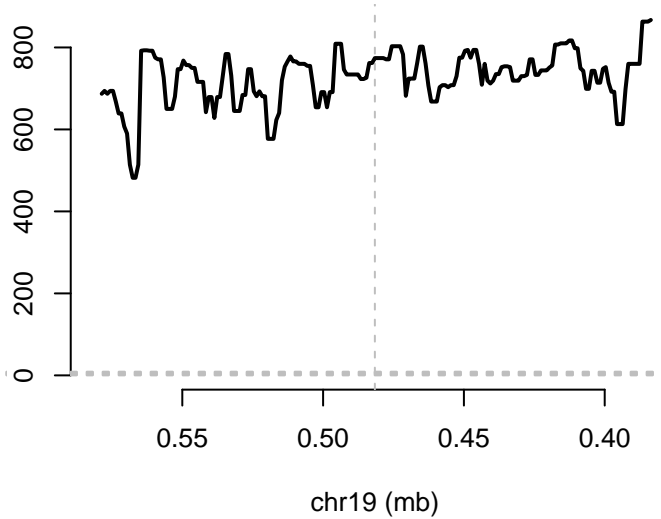

K562 chr19:379,744::chr19:481,614-+

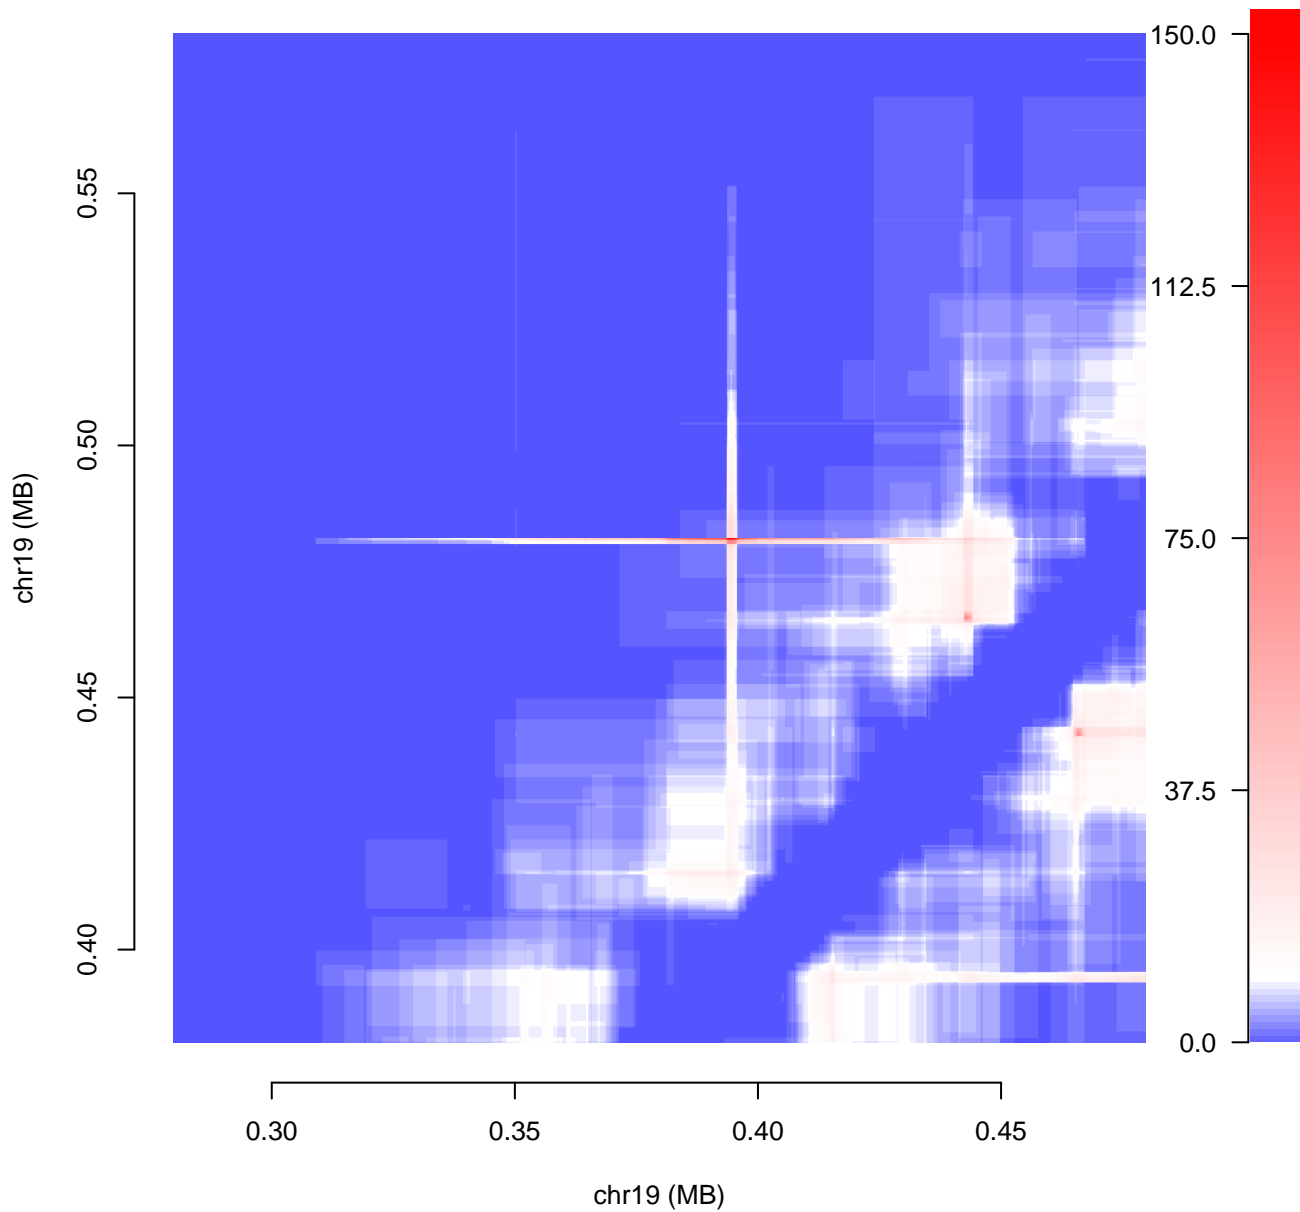

Supplement: Supplemental_Data.zip [file event_483.pdf › event_483.pdf]

Barcode

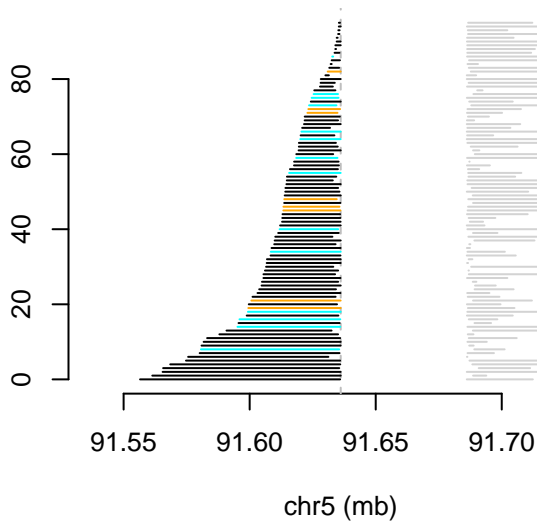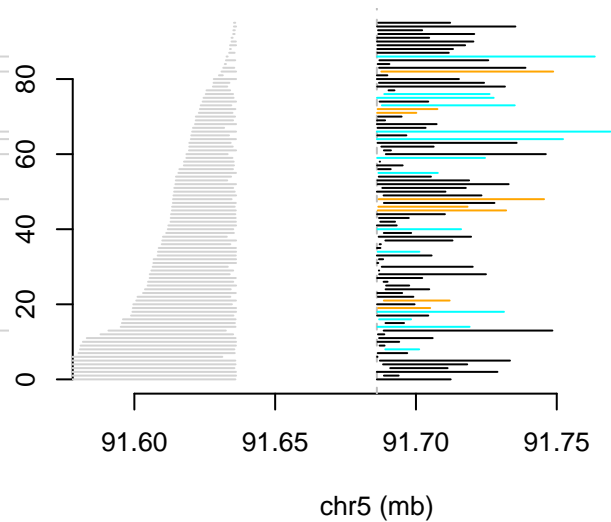

Copy number

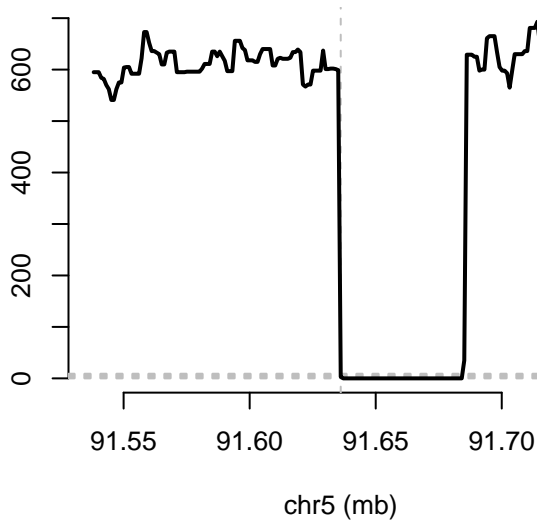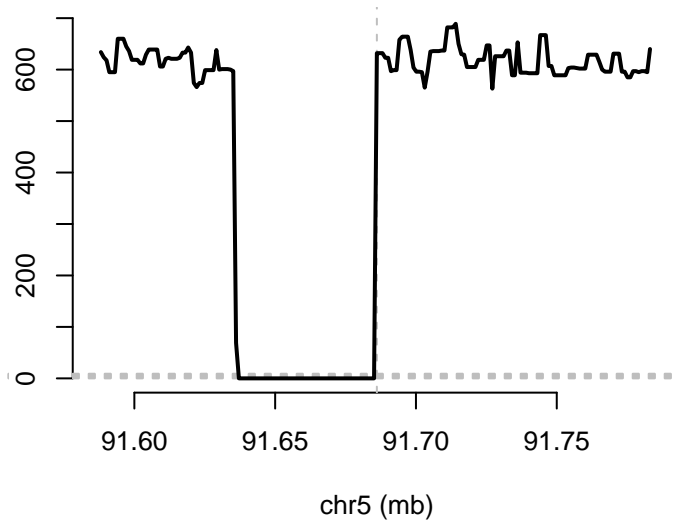

K562 chr5:91,636,128::chr5:91,686,124+-

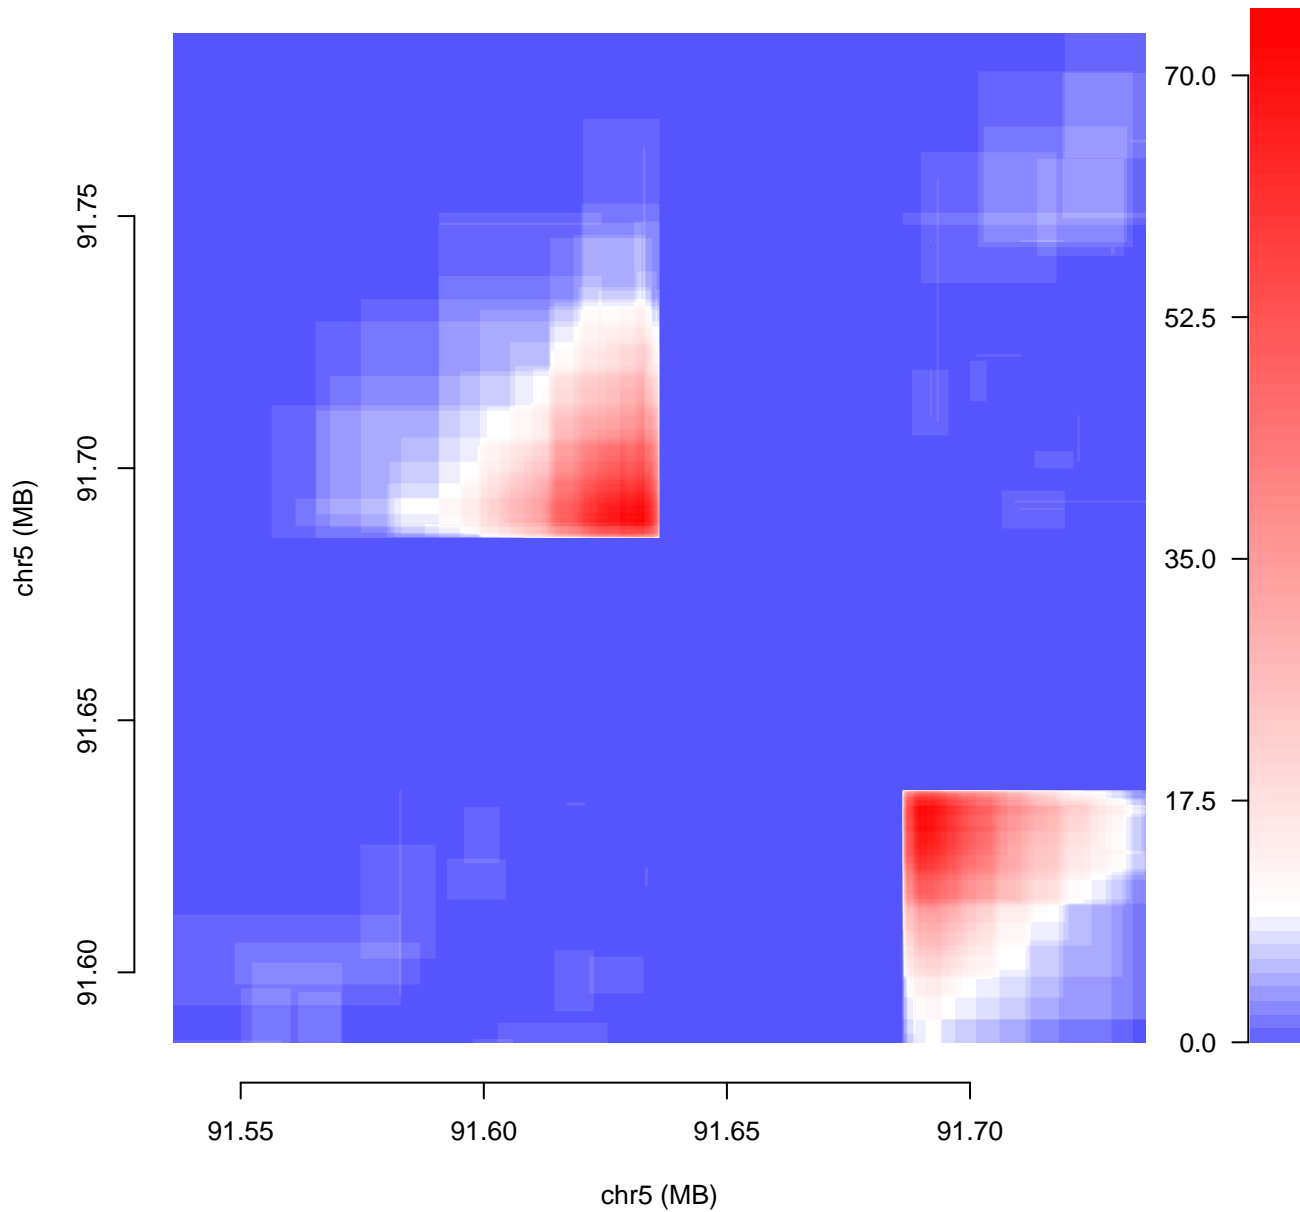

Supplement: Supplemental_Data.zip [file event_484.pdf › event_484.pdf]

Barcode

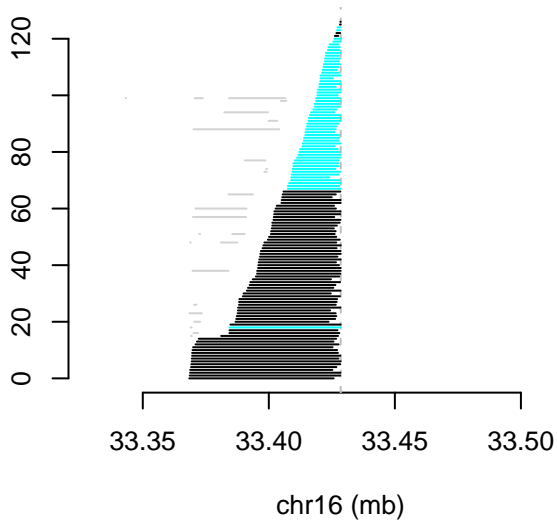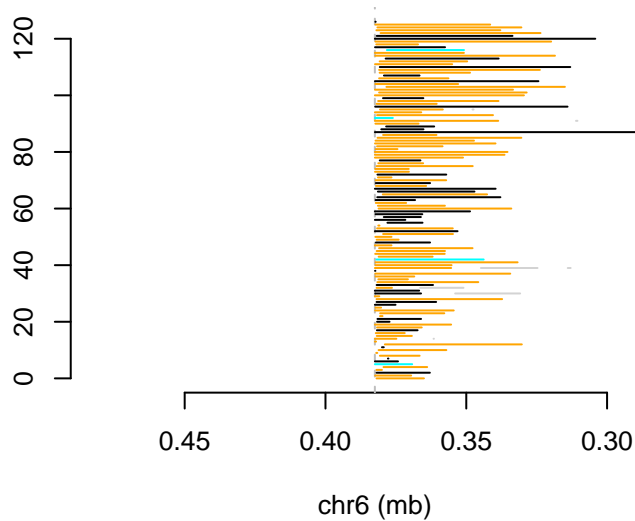

Copy number

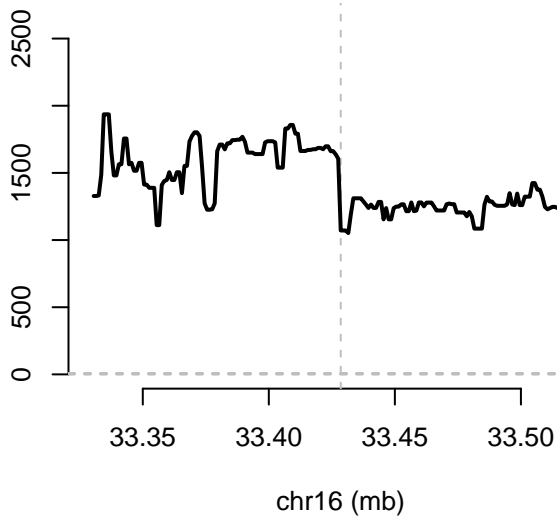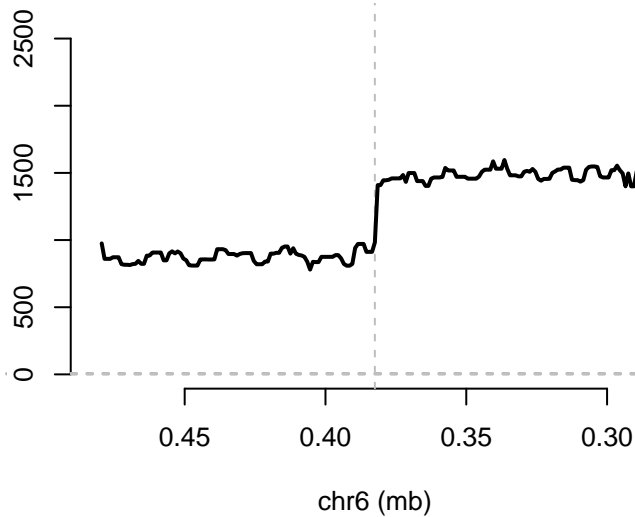

K562 chr6:382,461::chr16:33,428,530++

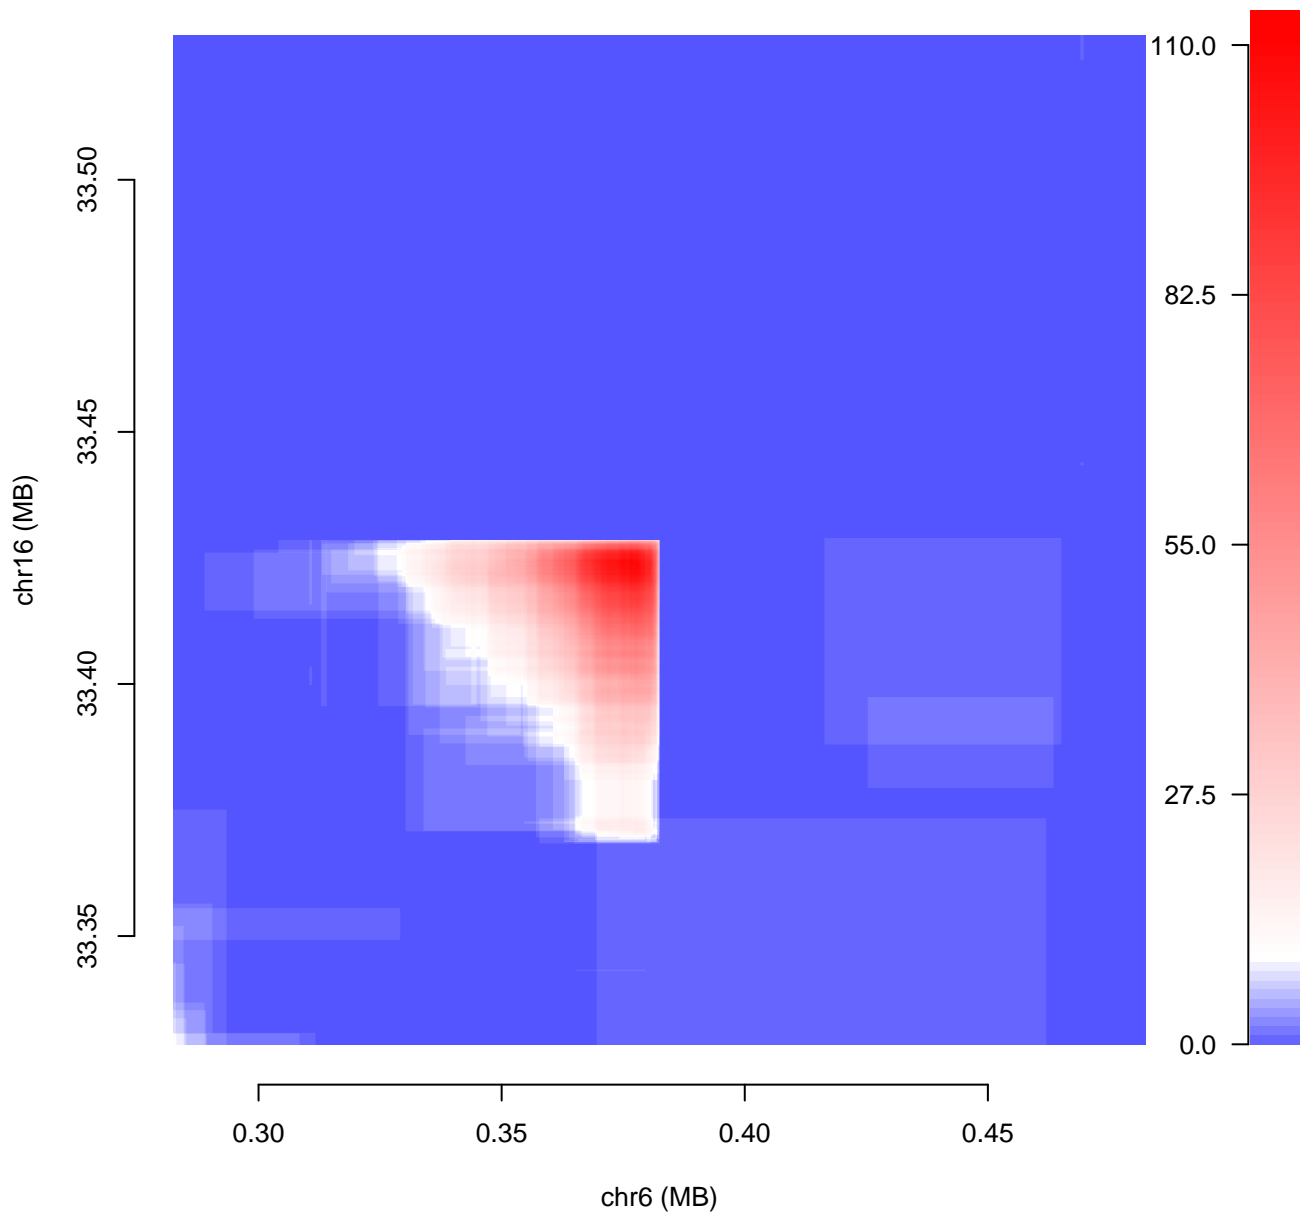

Supplement: Supplemental_Data.zip [file event_485.pdf › event_485.pdf]

Barcode

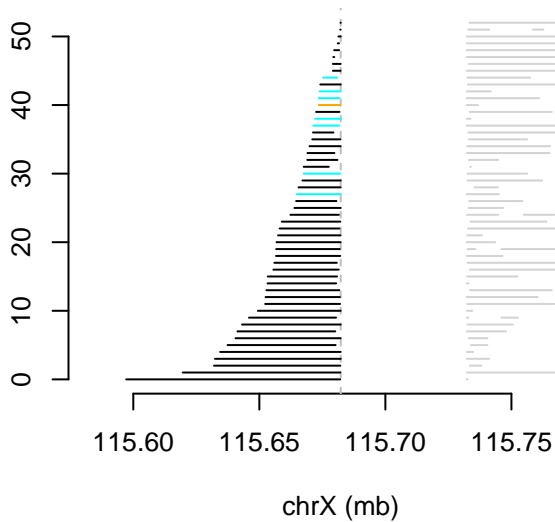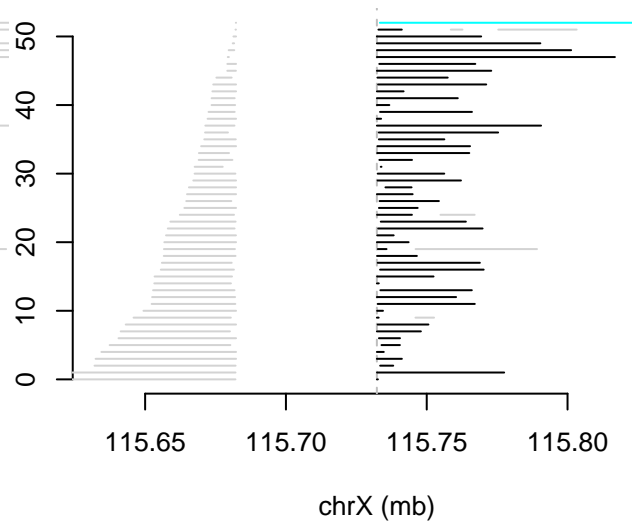

Copy number

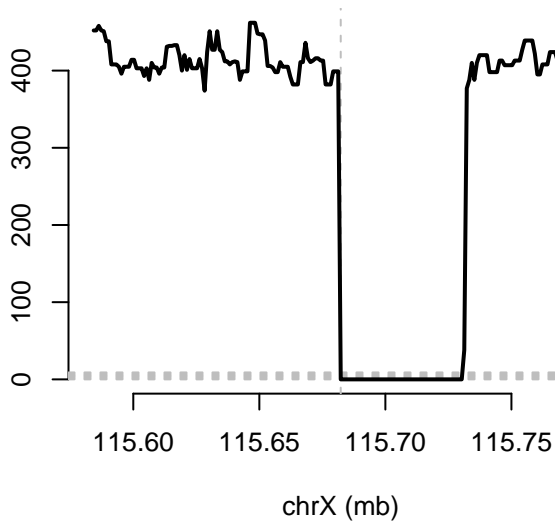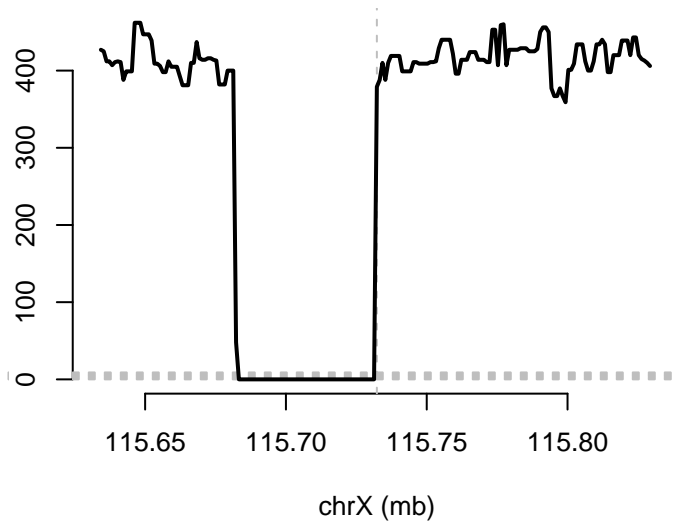

K562 chrX:115,682,291::chrX:115,732,289+-

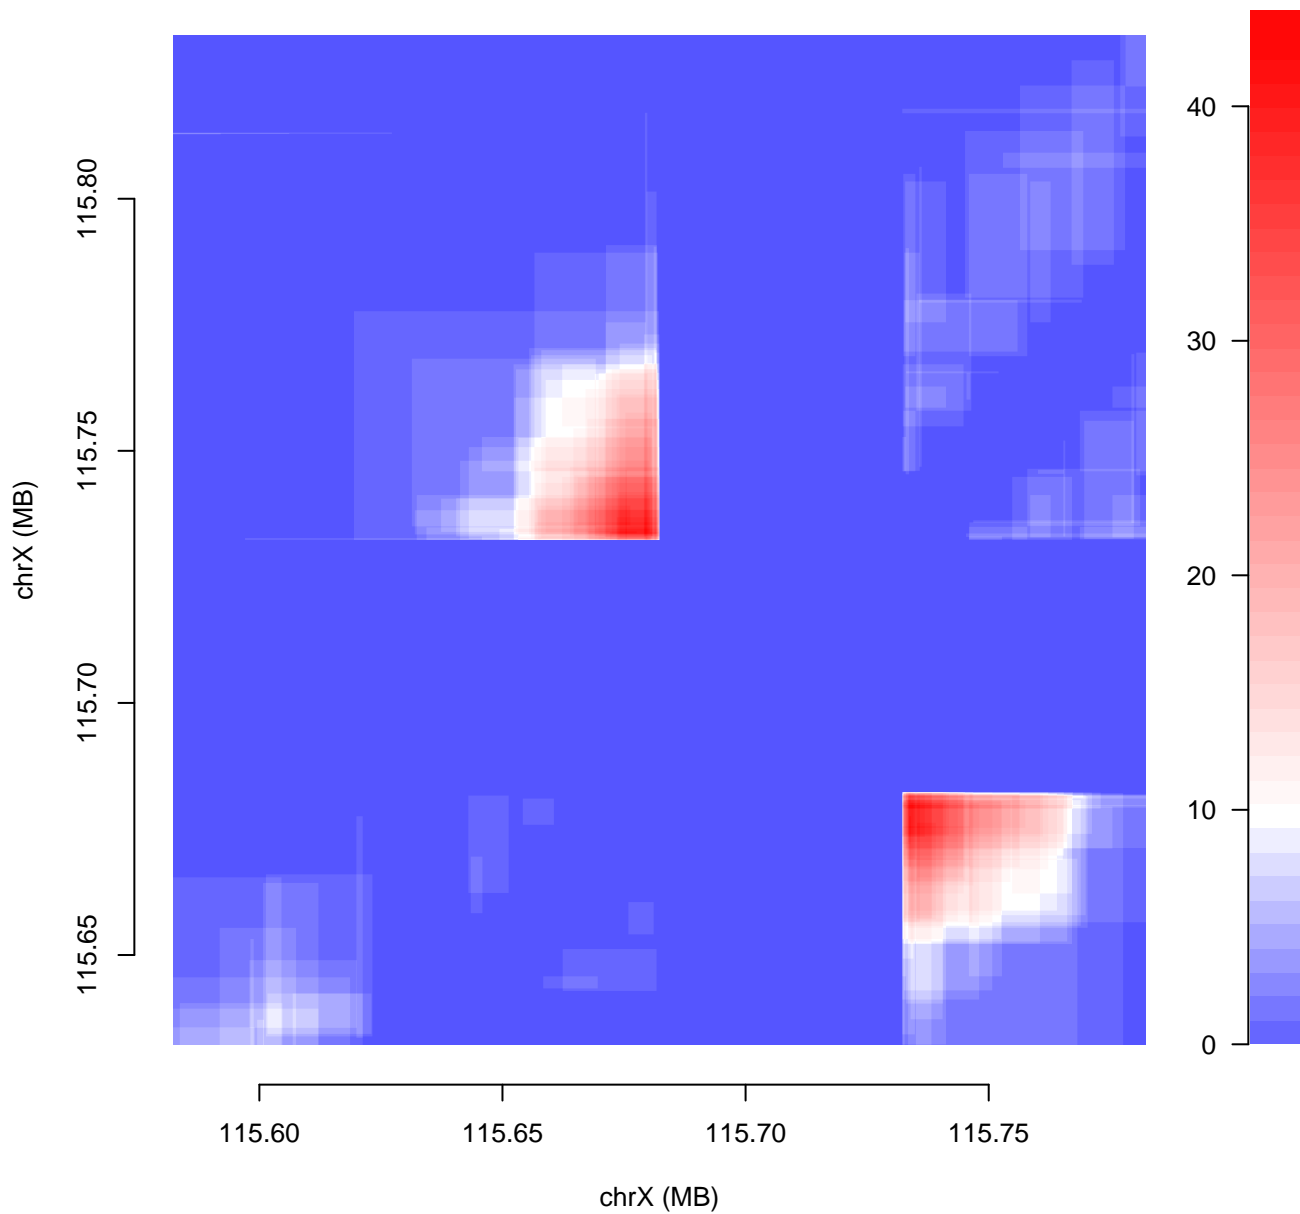

Supplement: Supplemental_Data.zip [file event_486.pdf › event_486.pdf]

Barcode

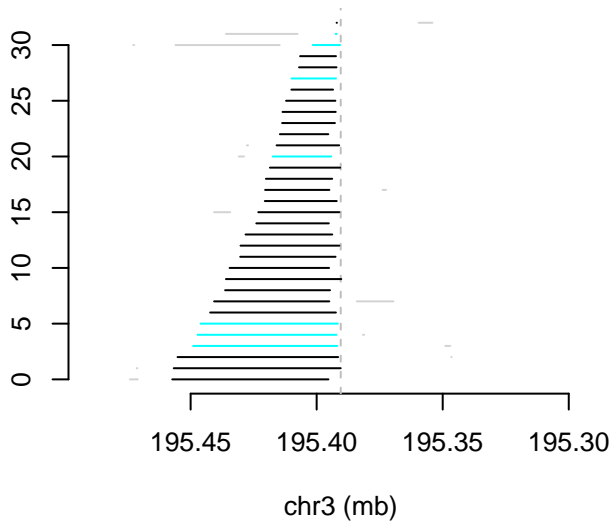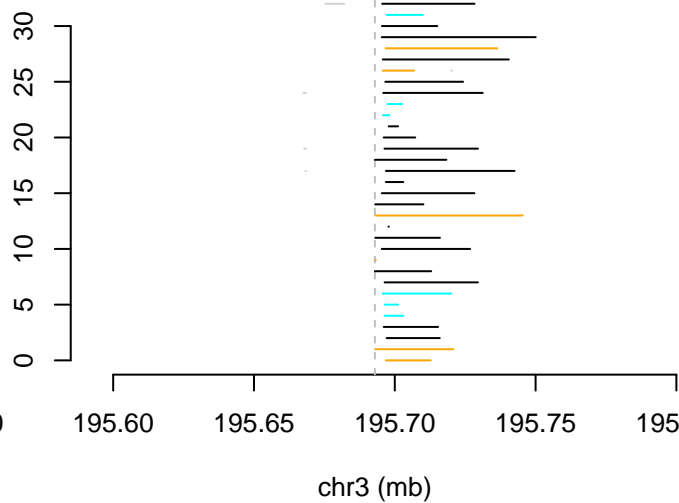

Copy number

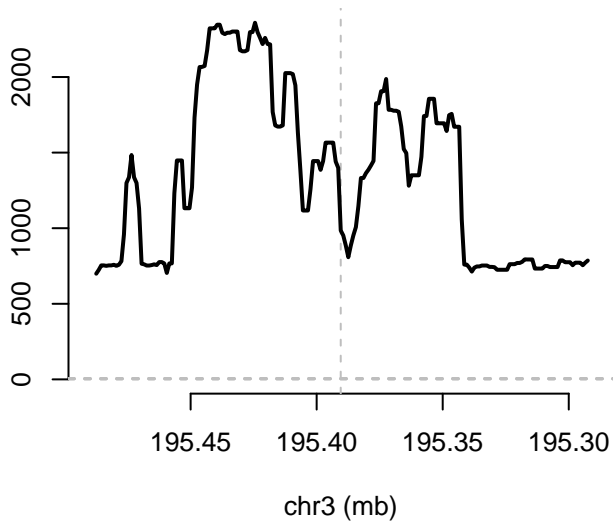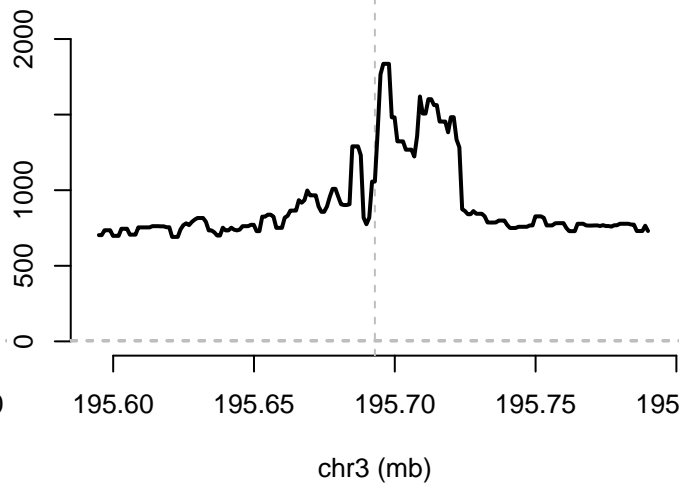

K562 chr3:195,692,927::chr3:195,390,447--

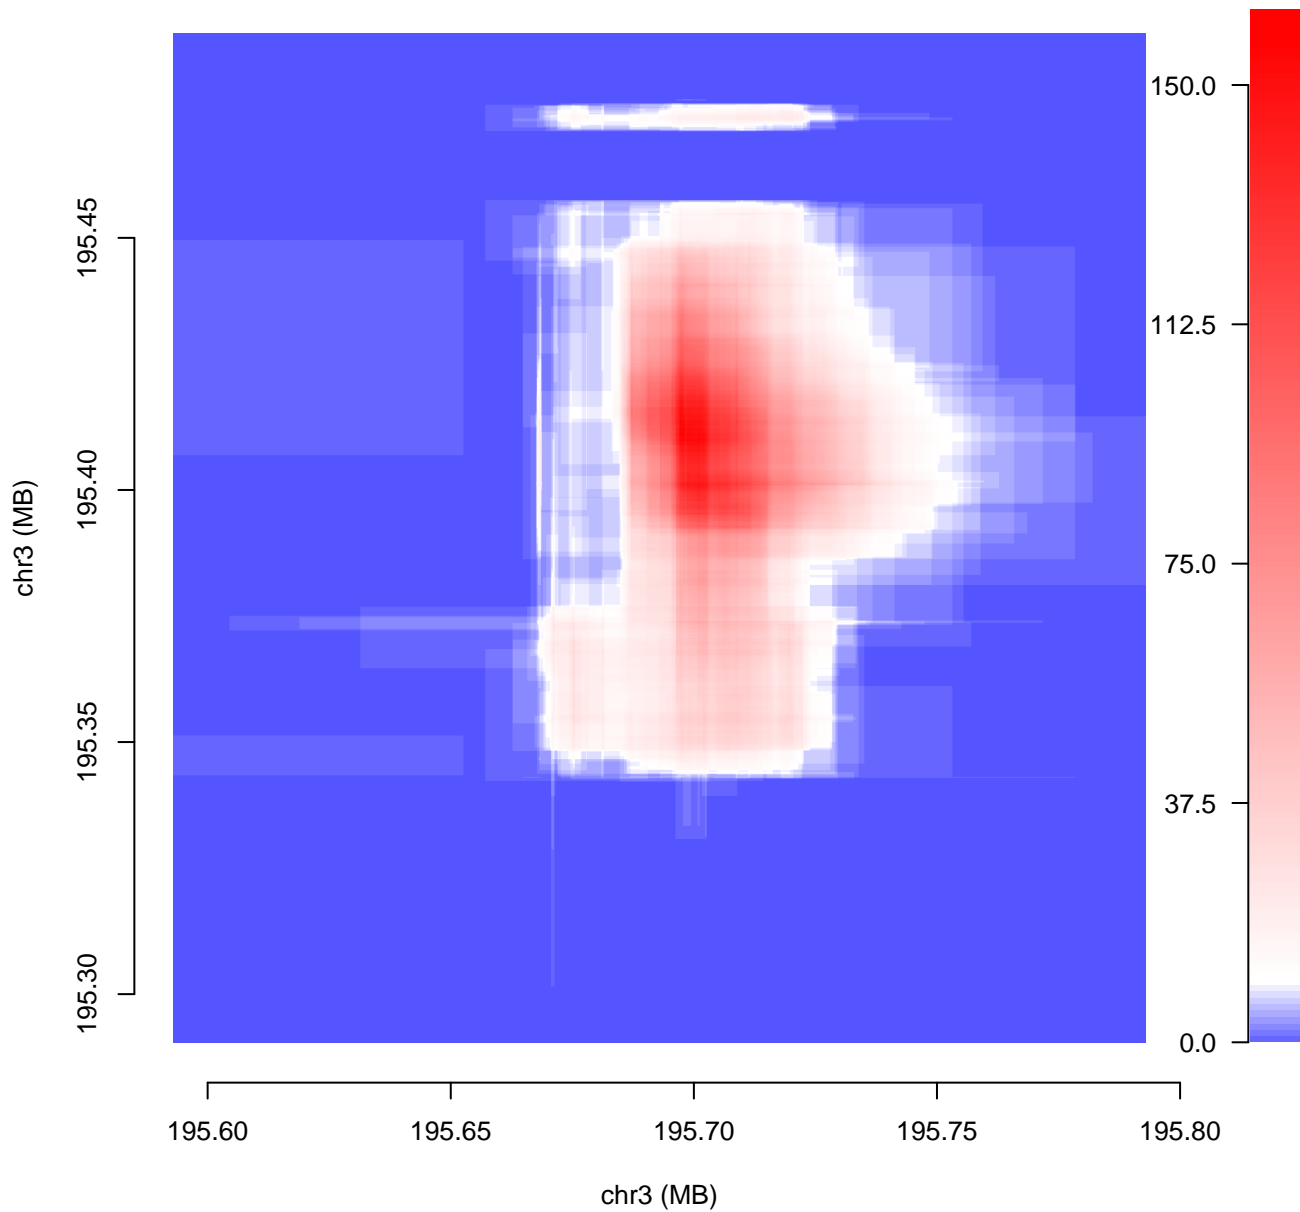

Supplement: Supplemental_Data.zip [file event_487.pdf › event_487.pdf]

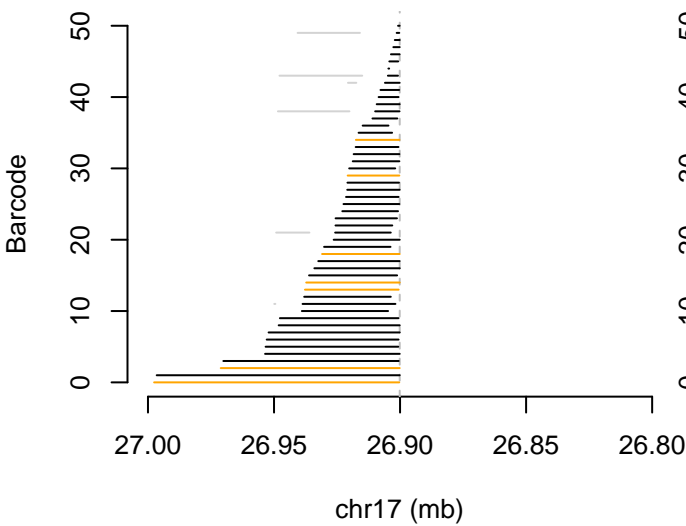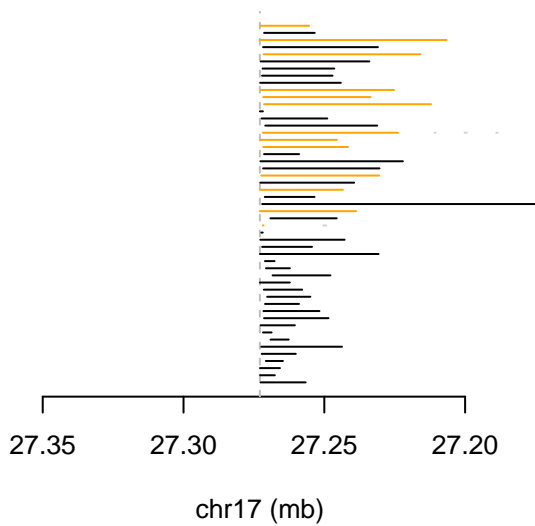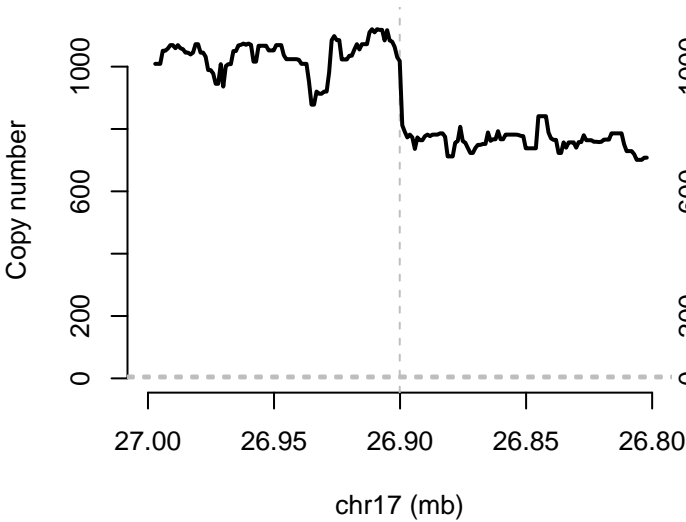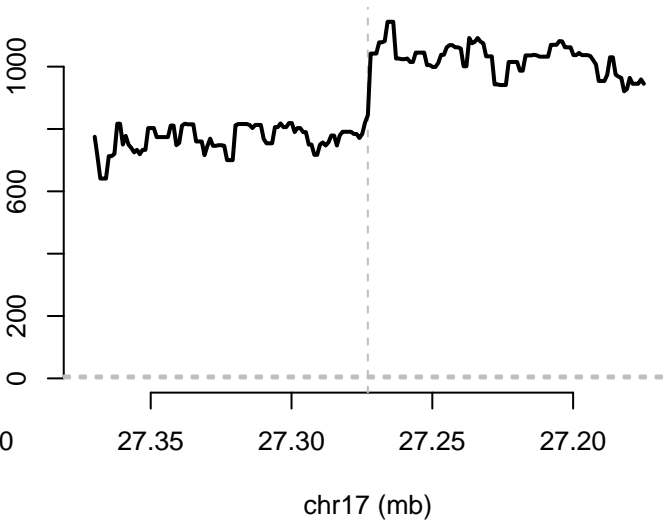

K562 chr17:26,900,126::chr17:27,272,884-+

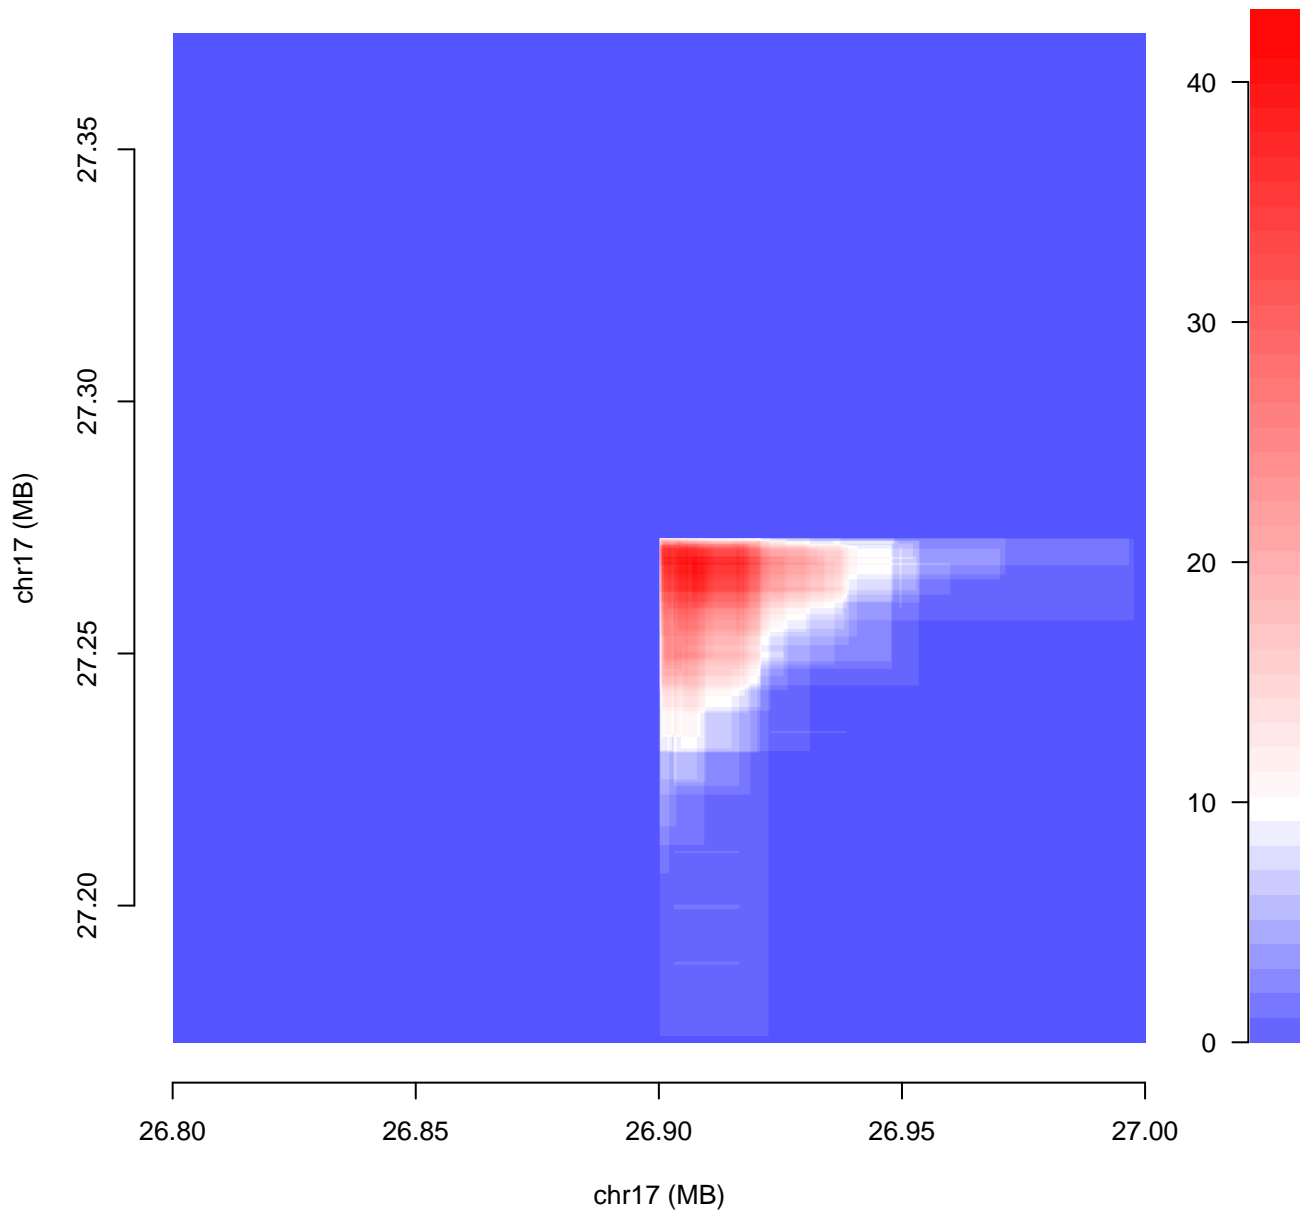

Supplement: Supplemental_Data.zip [file event_488.pdf › event_488.pdf]

Barcode

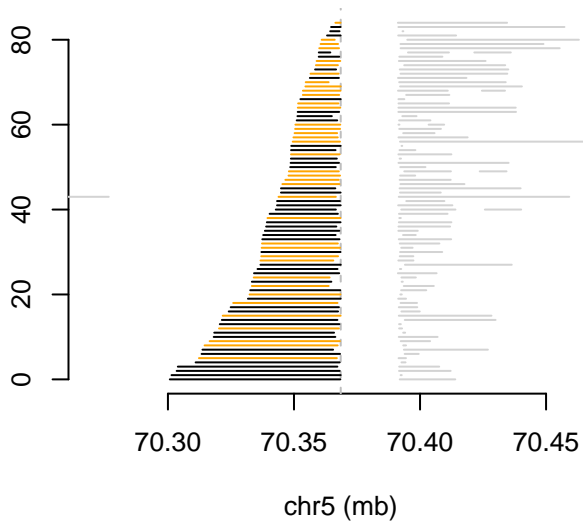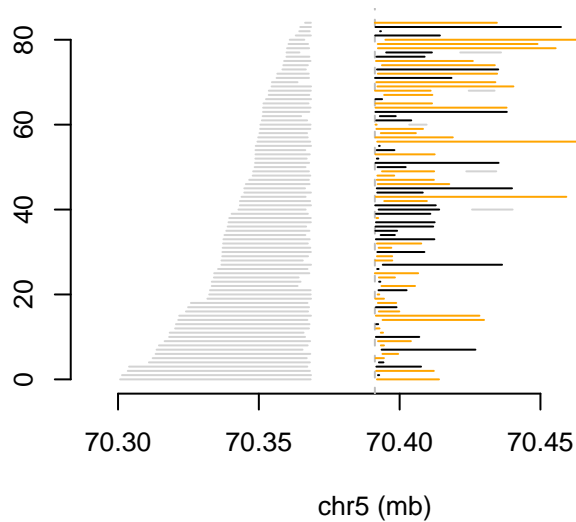

Copy number

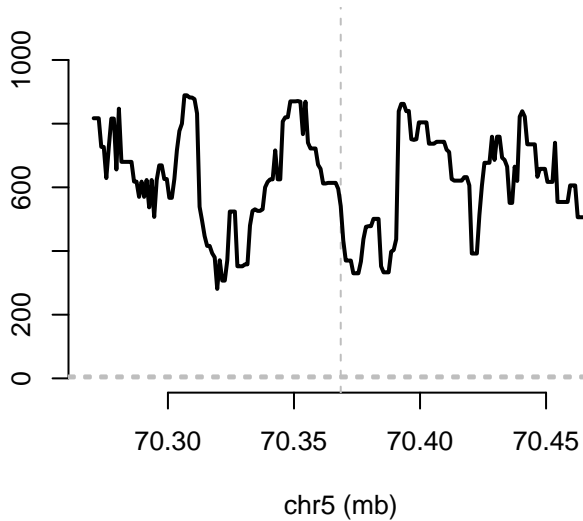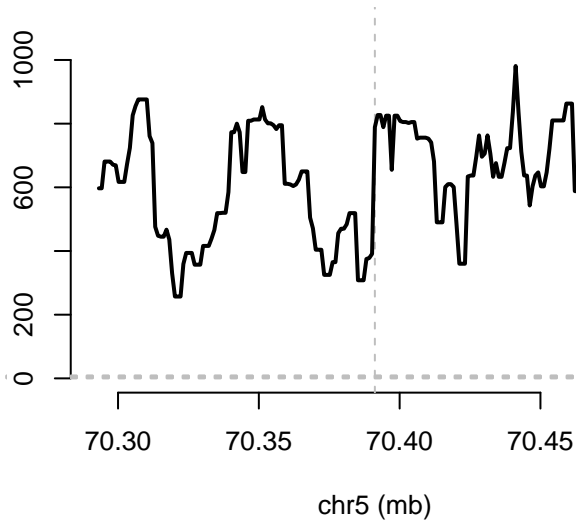

K562 chr5:70,391,208::chr5:70,368,548-+

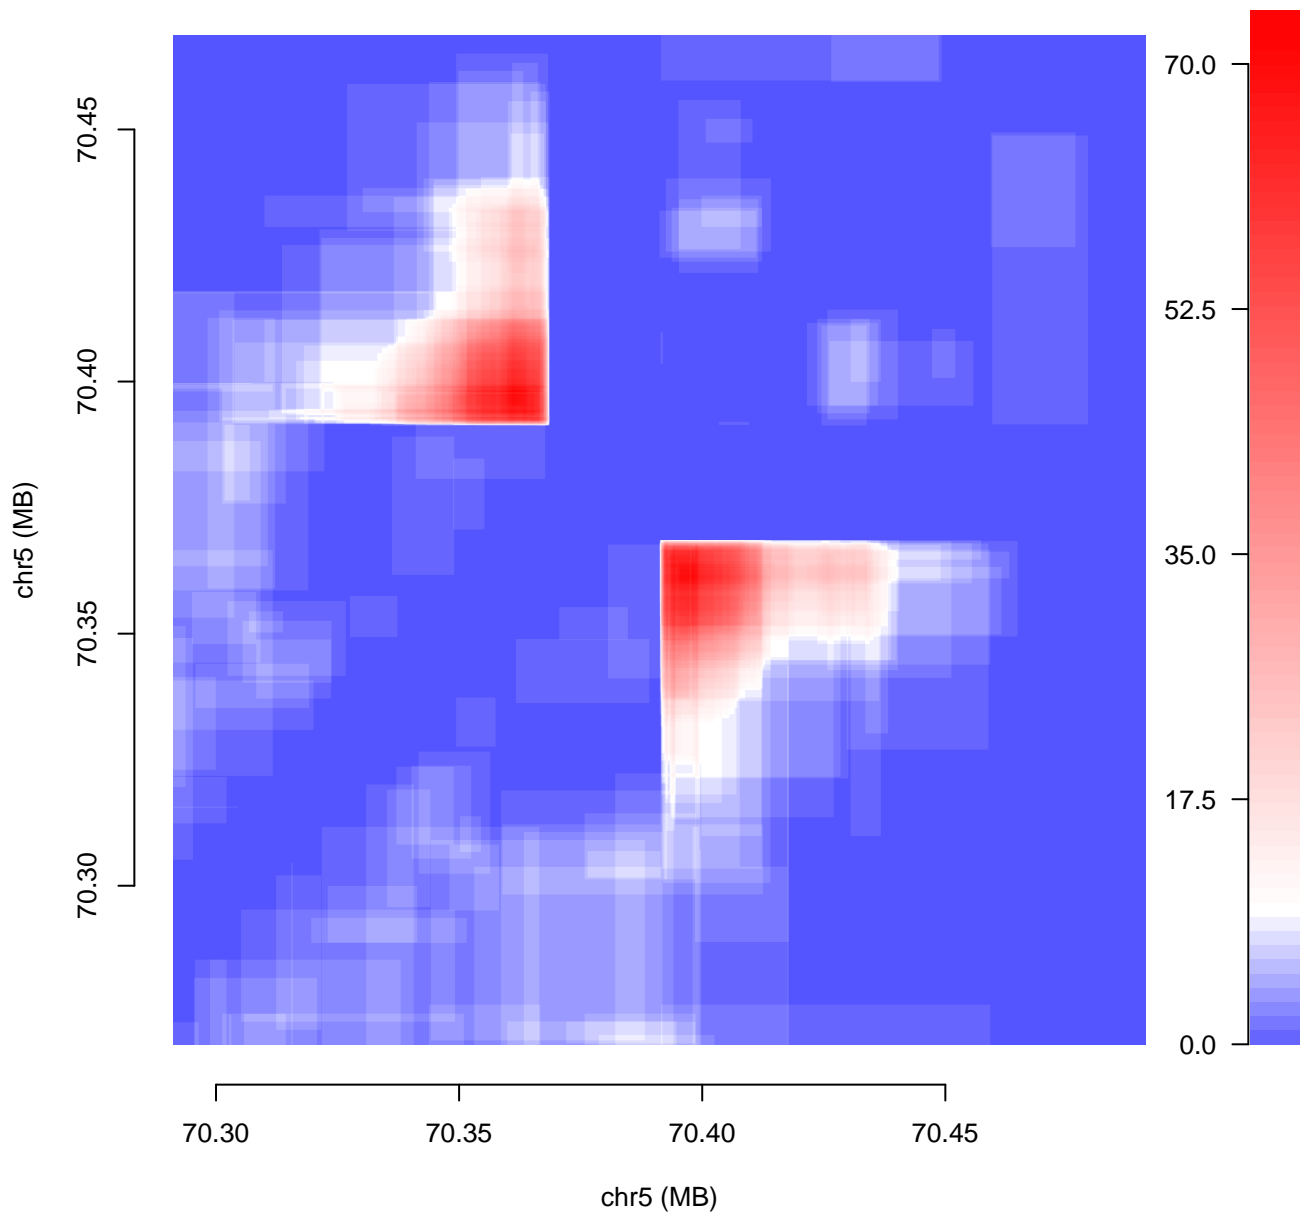

Supplement: Supplemental_Data.zip [file event_489.pdf › event_489.pdf]

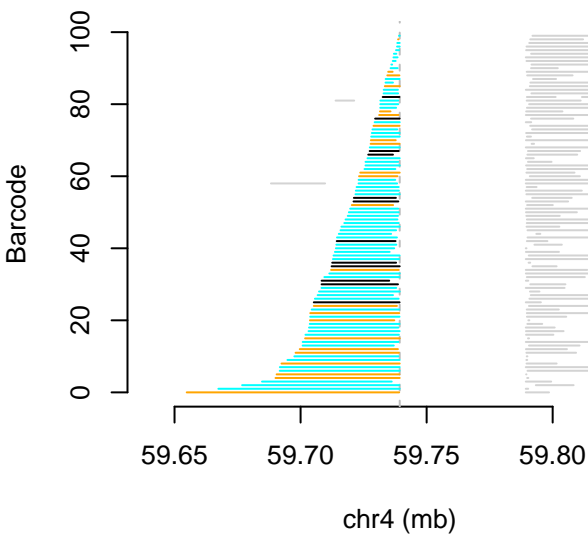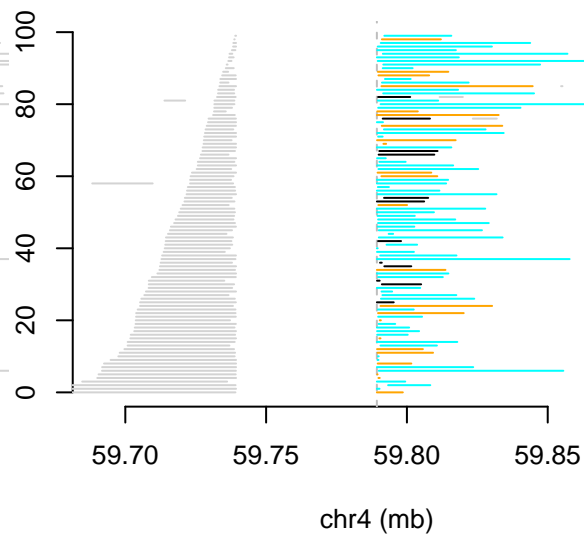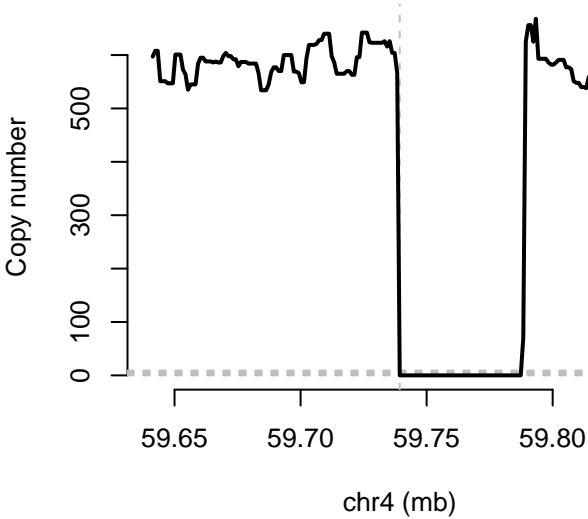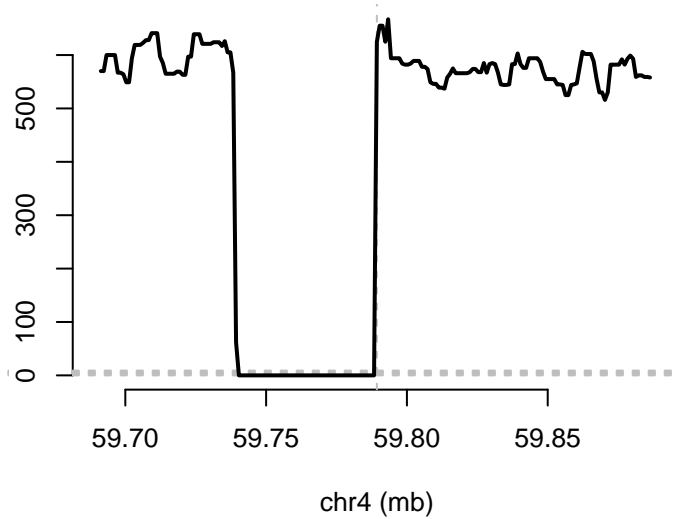

K562 chr4:59,739,333::chr4:59,789,331+-

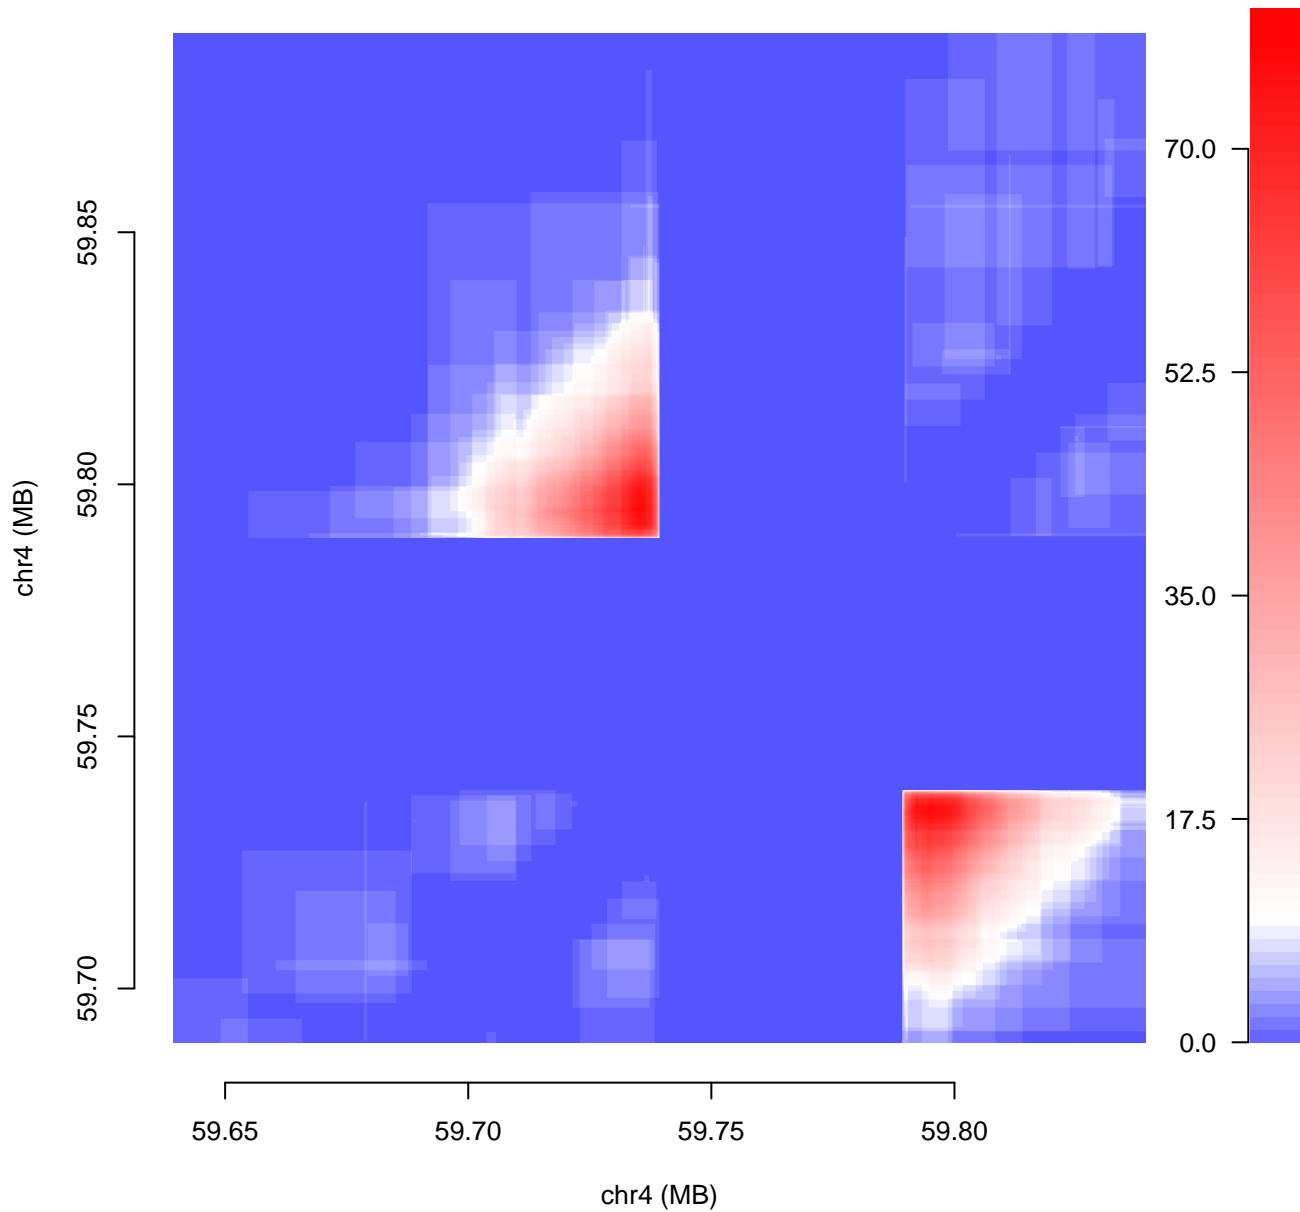

Supplement: Supplemental_Data.zip [file event_49.pdf › event_49.pdf]

Barcode

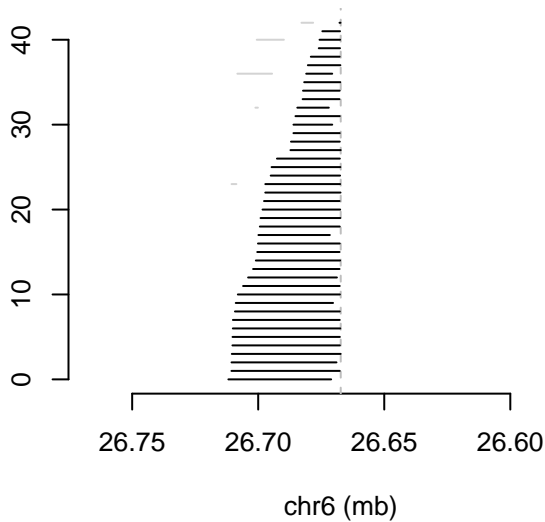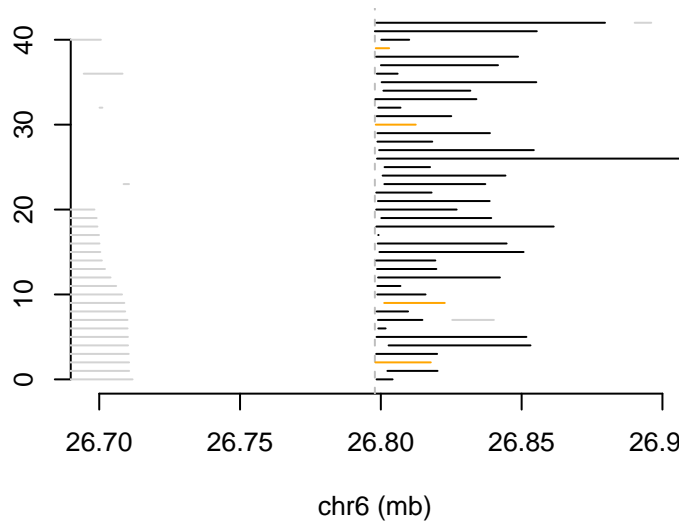

Copy number

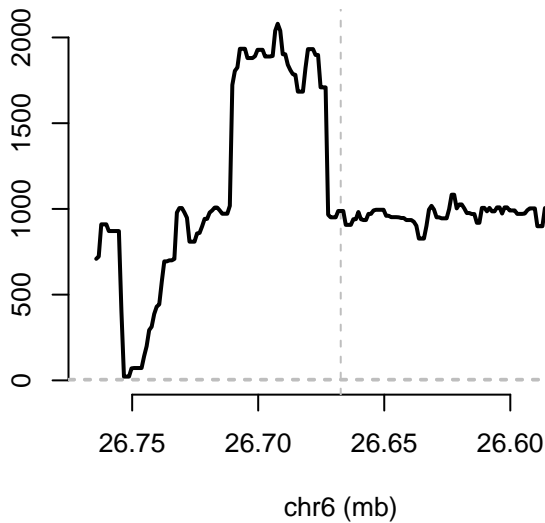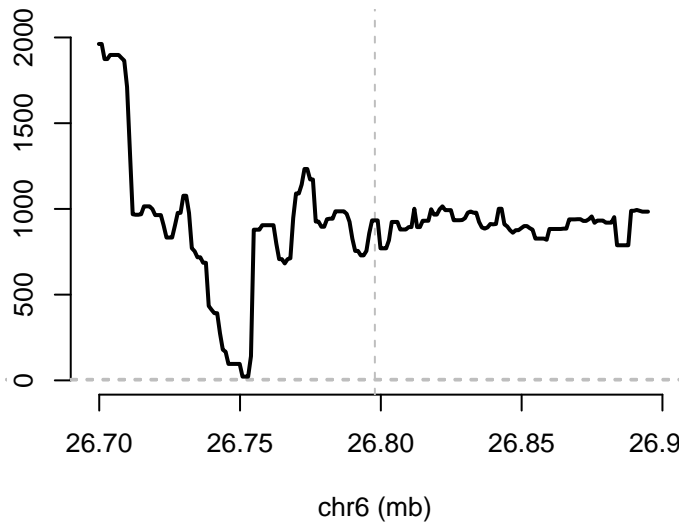

K562 chr6:26,797,885::chr6:26,667,261--

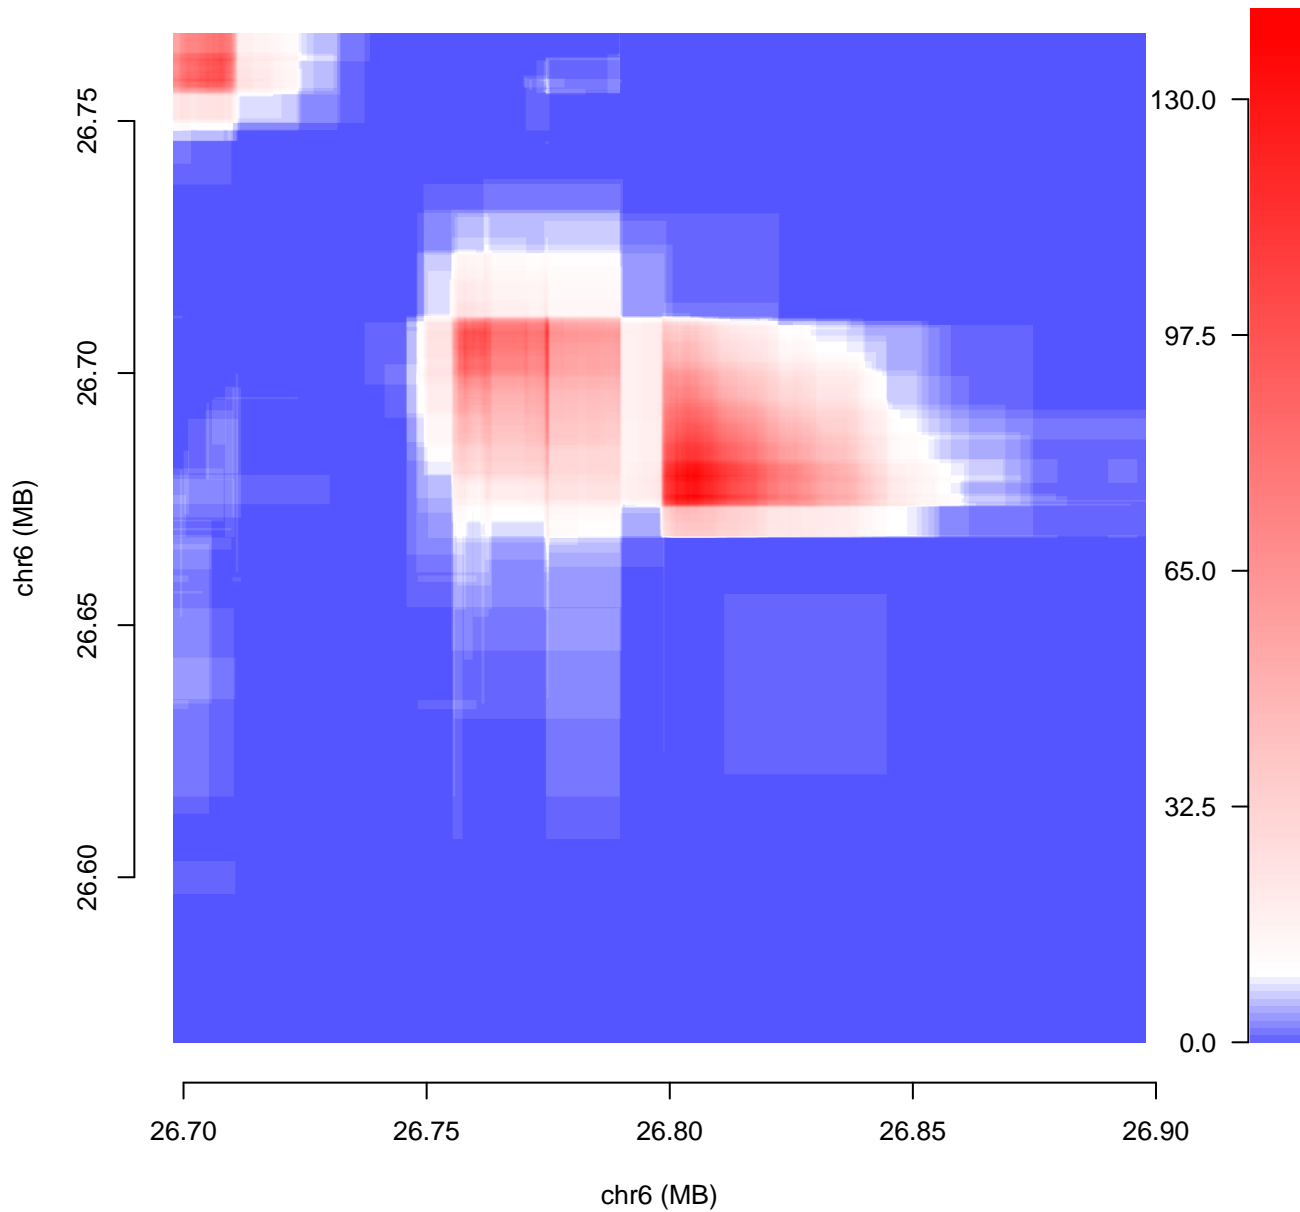

Supplement: Supplemental_Data.zip [file event_490.pdf › event_490.pdf]

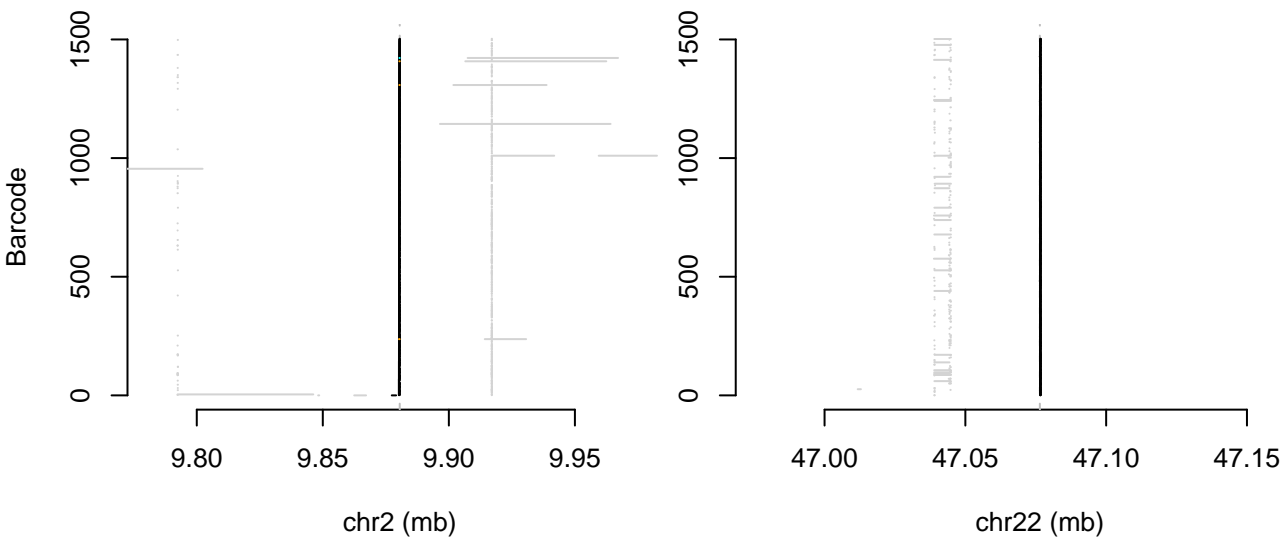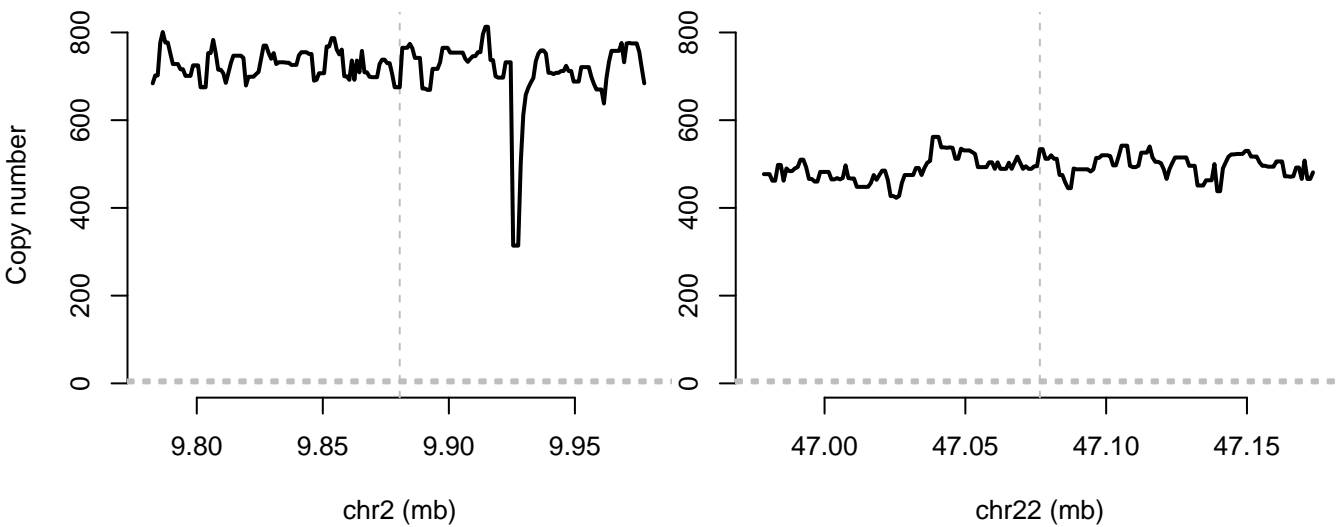

K562 chr22:47,076,457::chr2:9,880,519-+

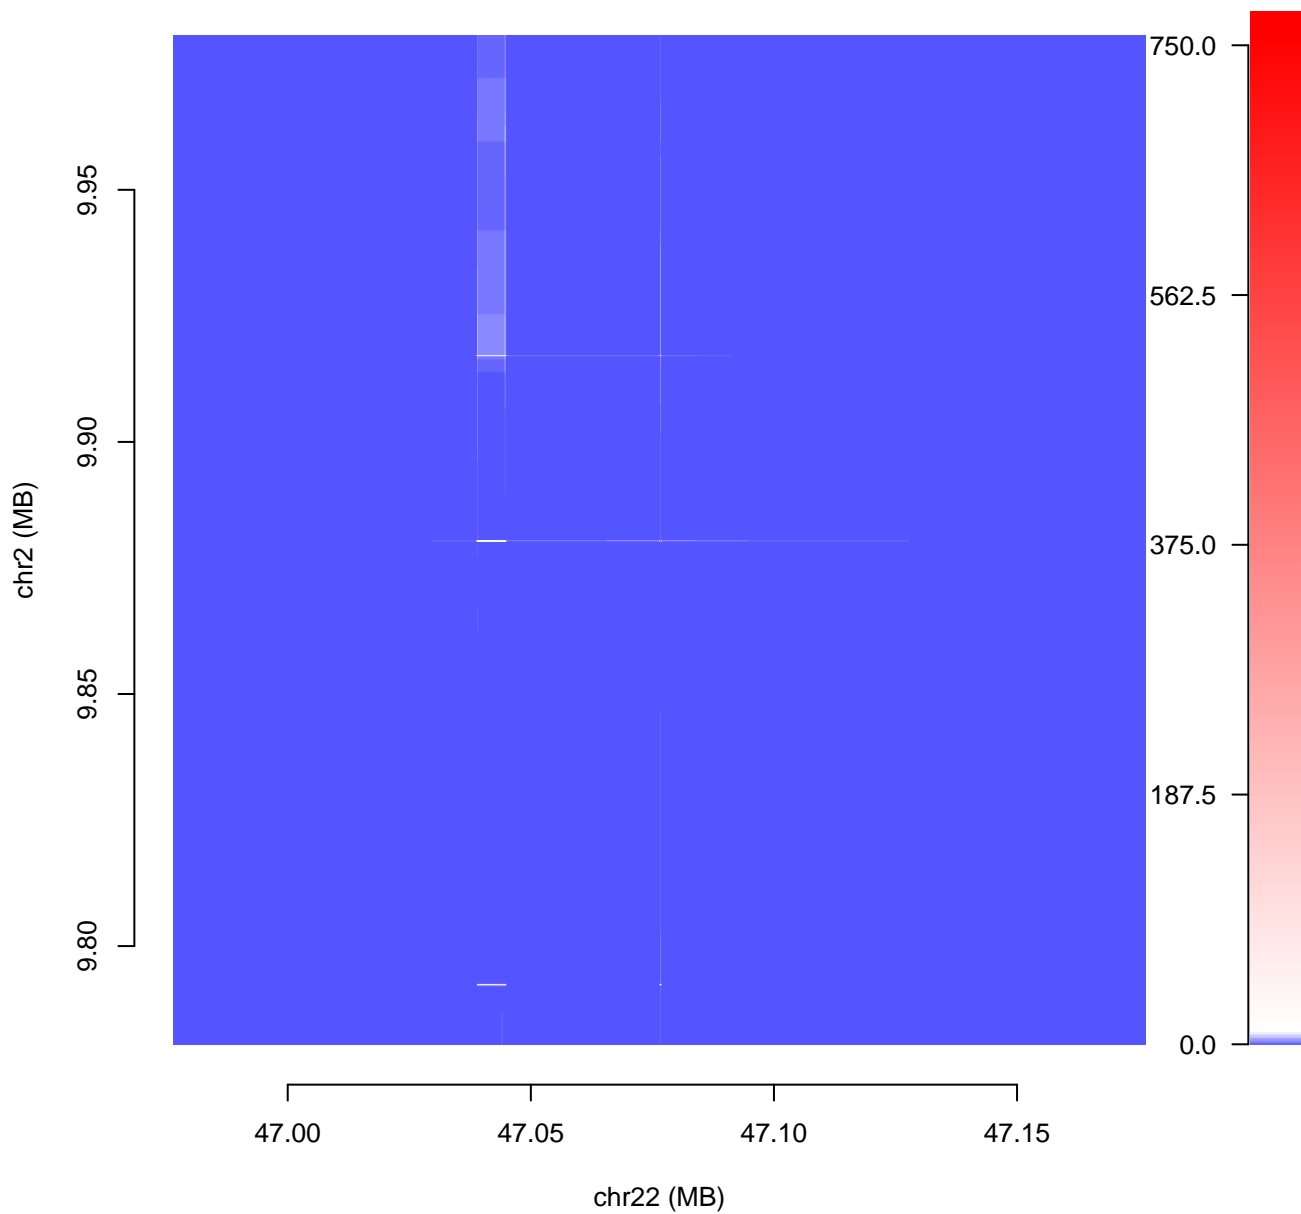

Supplement: Supplemental_Data.zip [file event_491.pdf › event_491.pdf]

Barcode

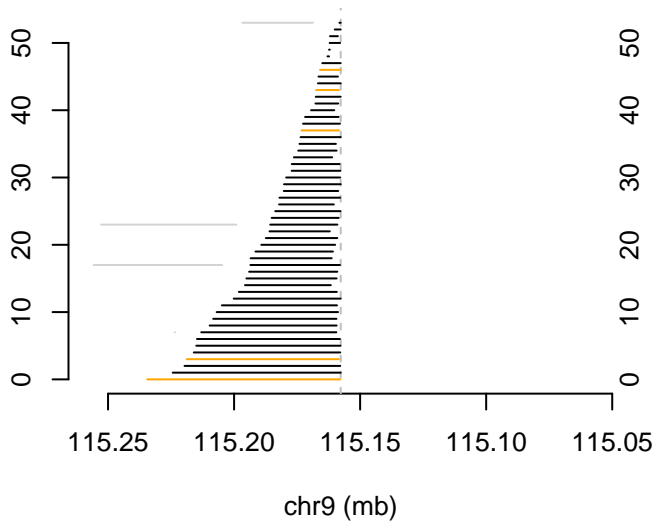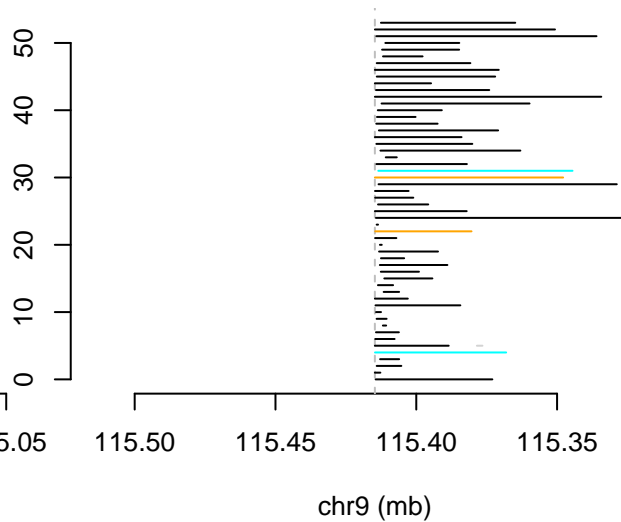

Copy number

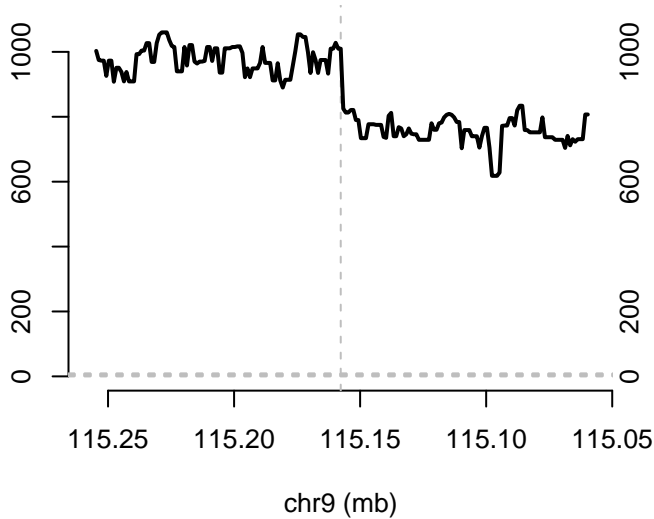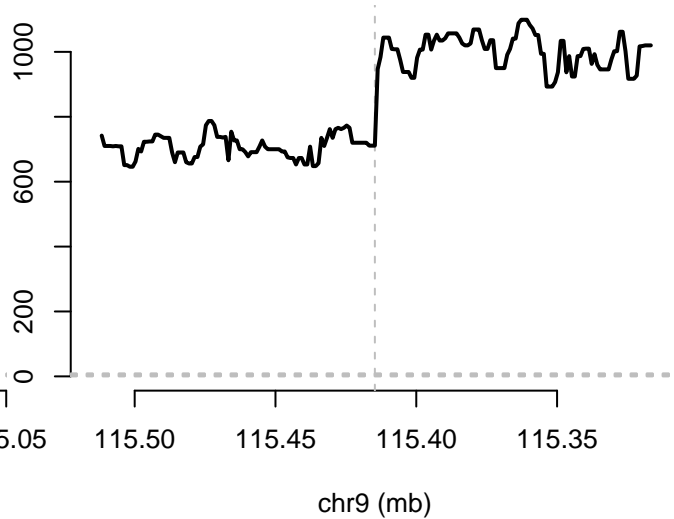

K562 chr9:115,157,689::chr9:115,414,703-+

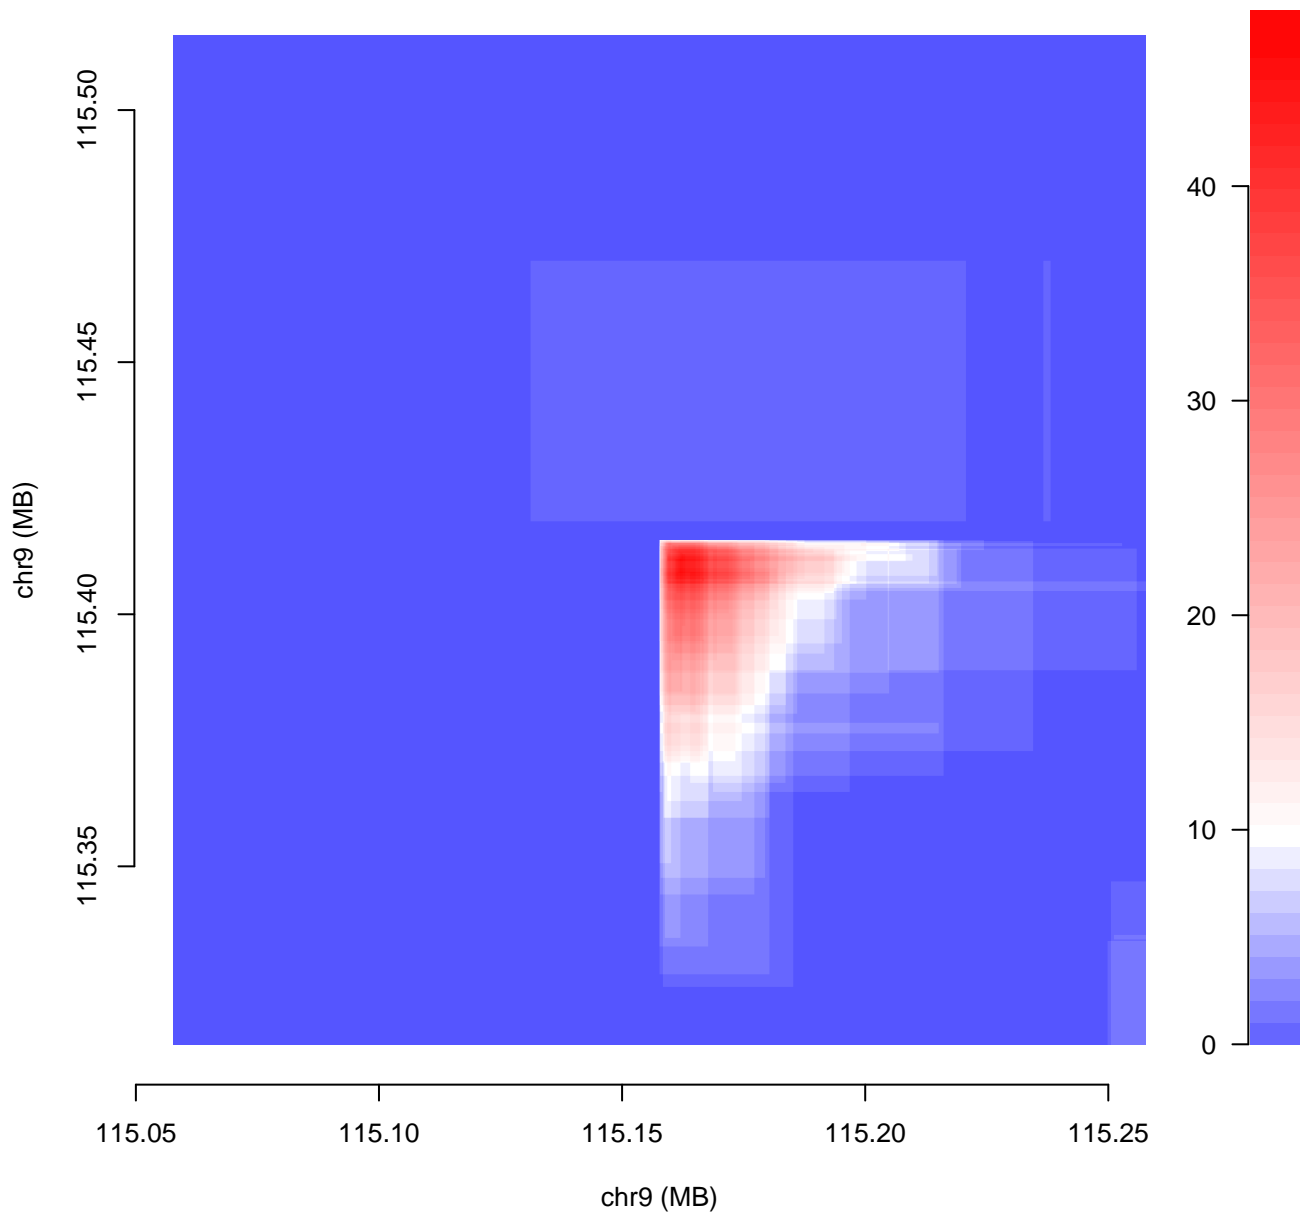

Supplement: Supplemental_Data.zip [file event_492.pdf › event_492.pdf]

Barcode

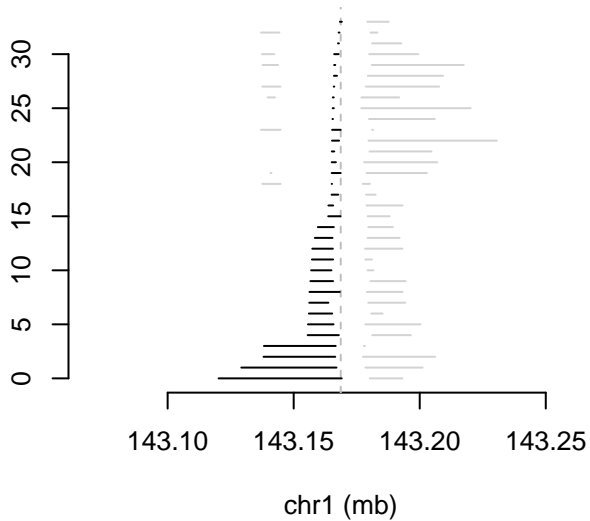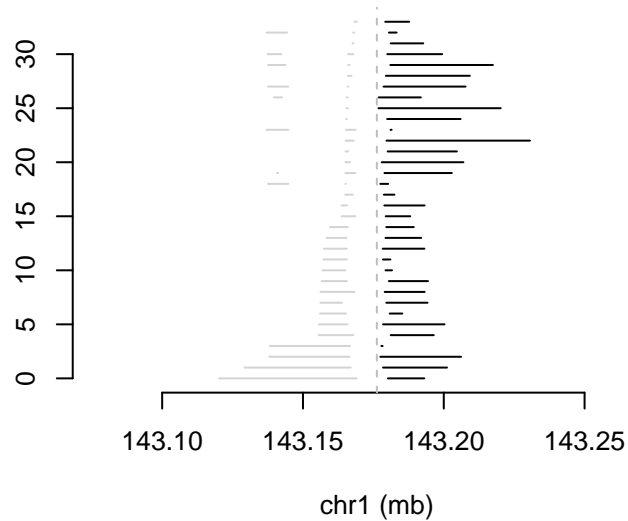

Copy number

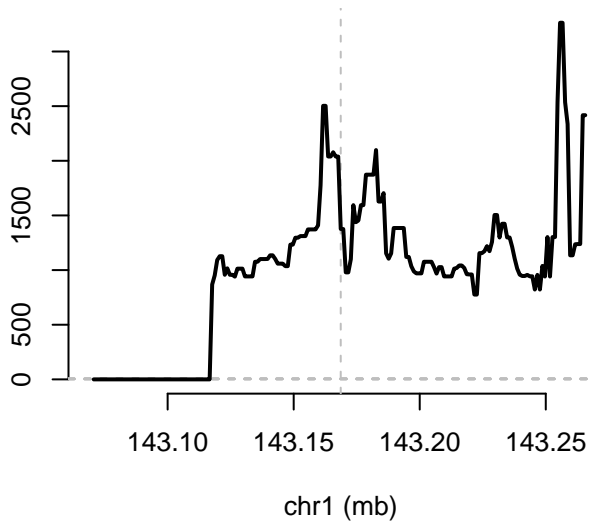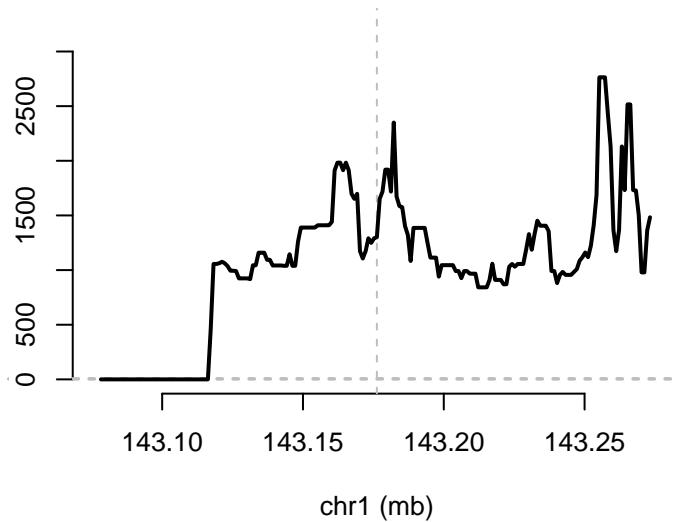

K562 chr1:143,176,239::chr1:143,168,669-+

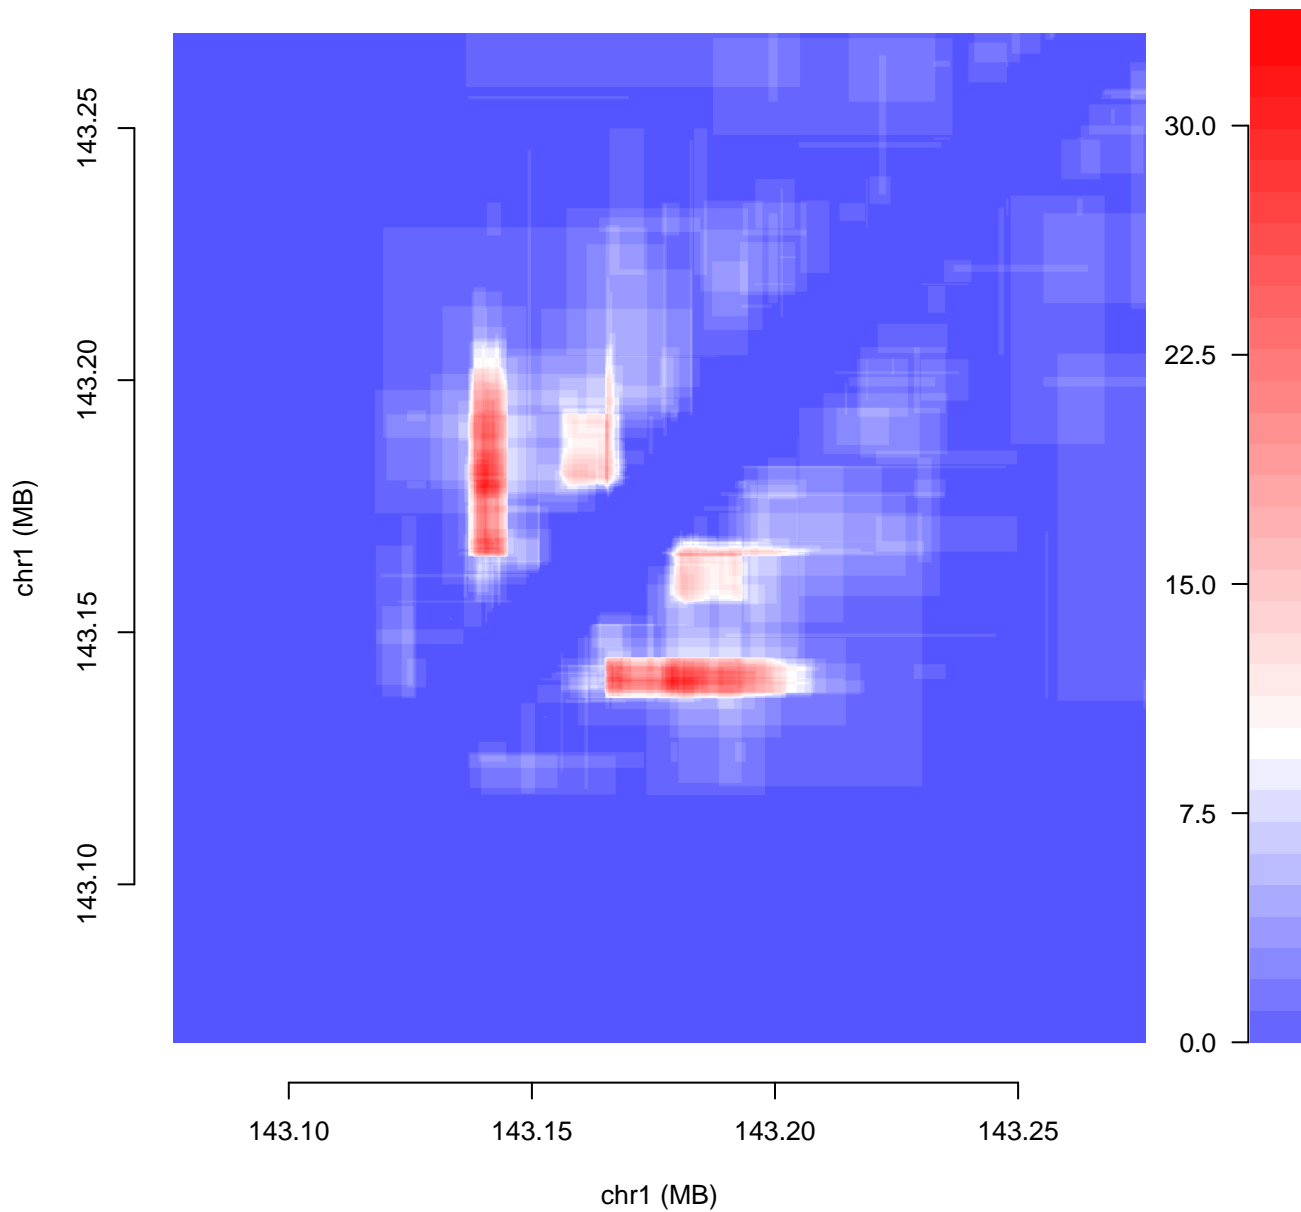

Supplement: Supplemental_Data.zip [file event_493.pdf › event_493.pdf]

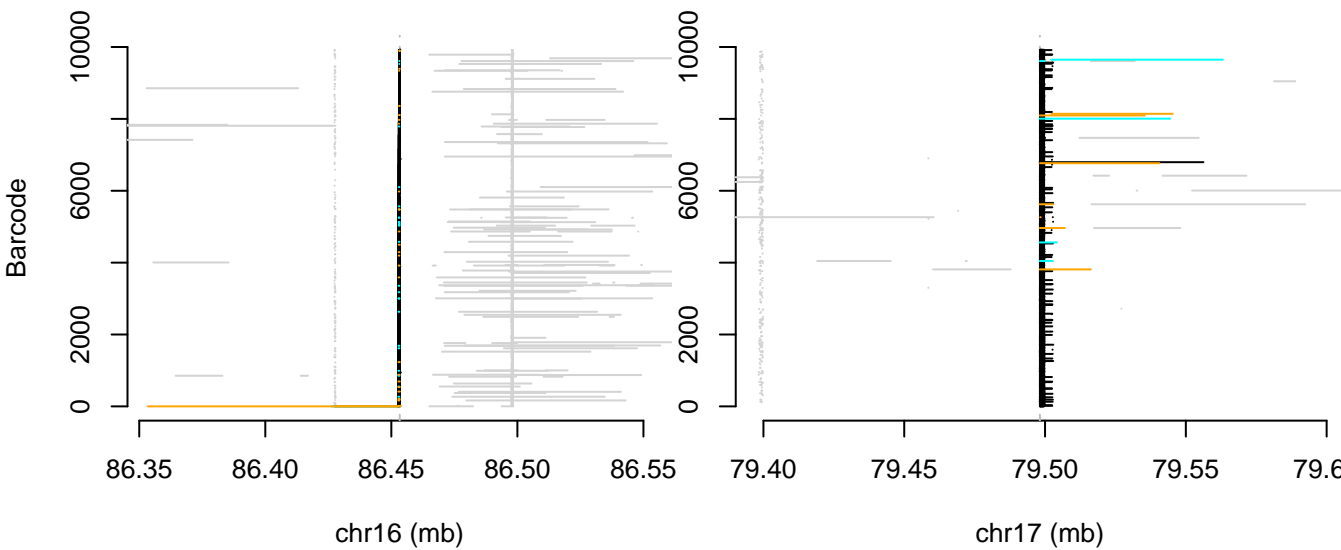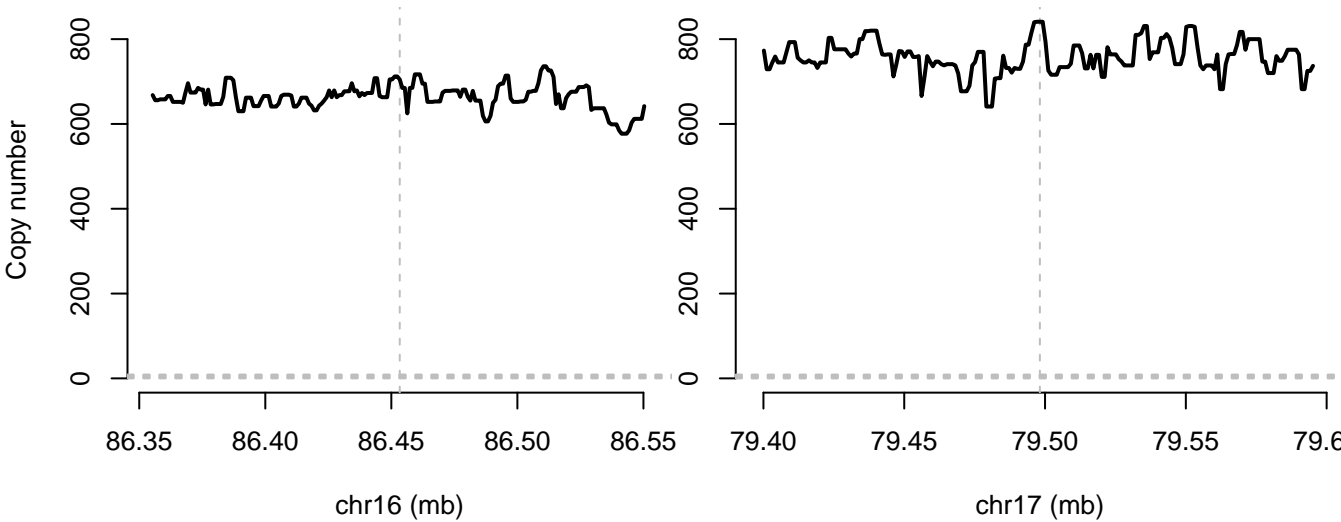

K562 chr17:79,498,167::chr16:86,453,333-+

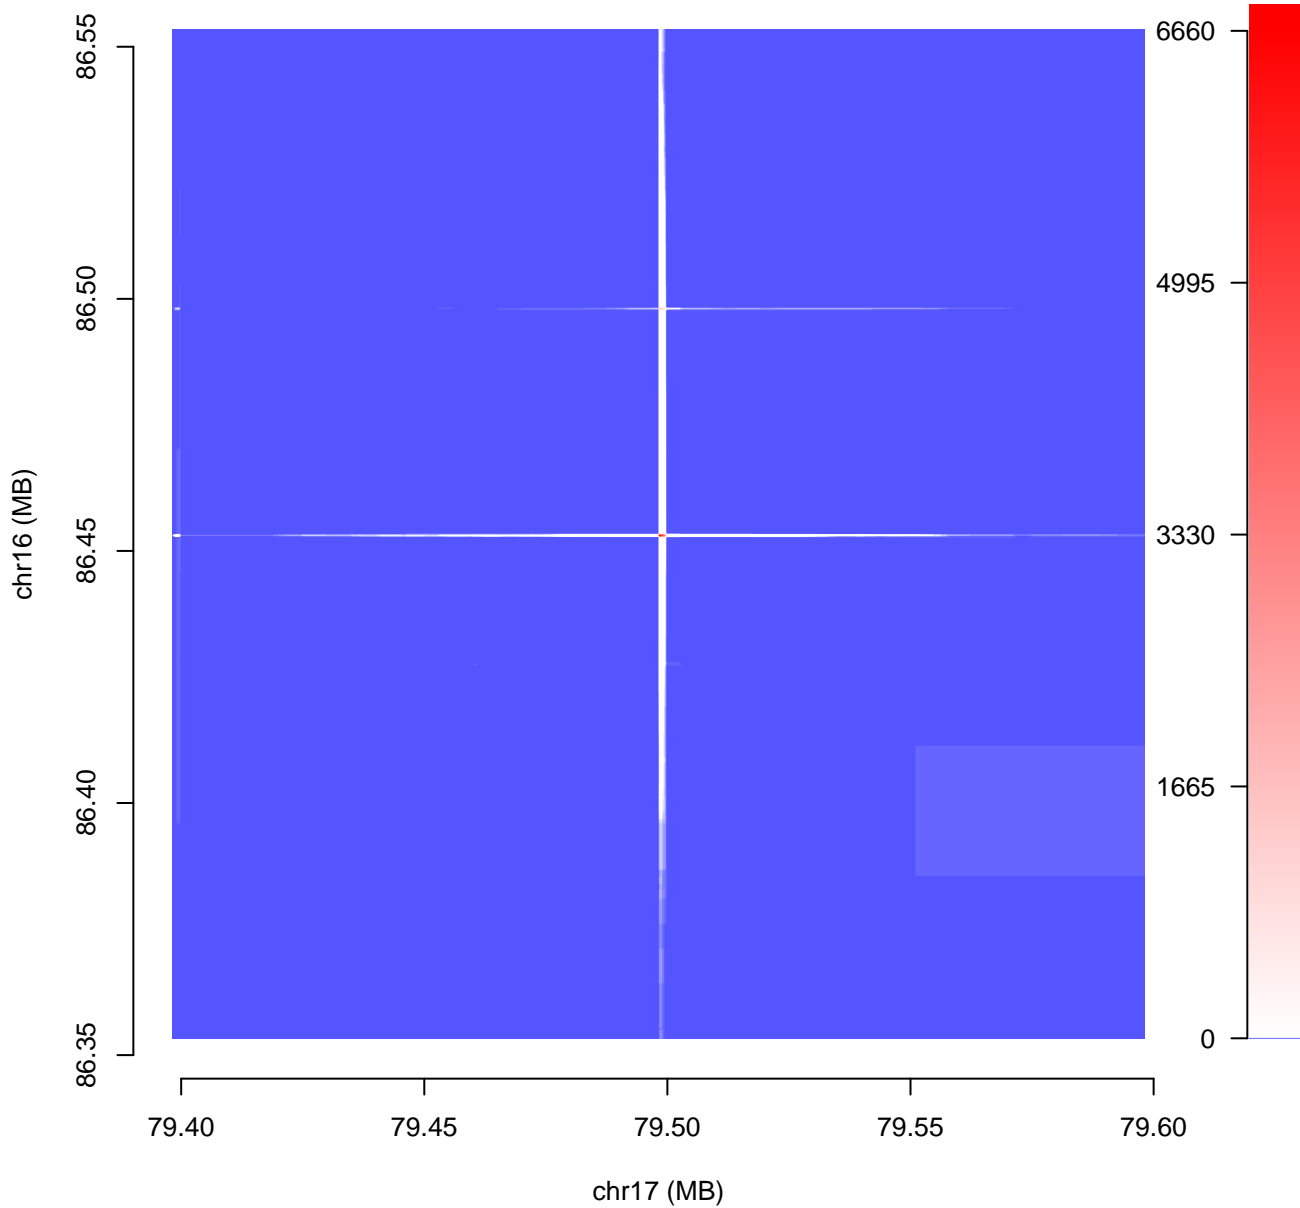

Supplement: Supplemental_Data.zip [file event_494.pdf › event_494.pdf]

Barcode

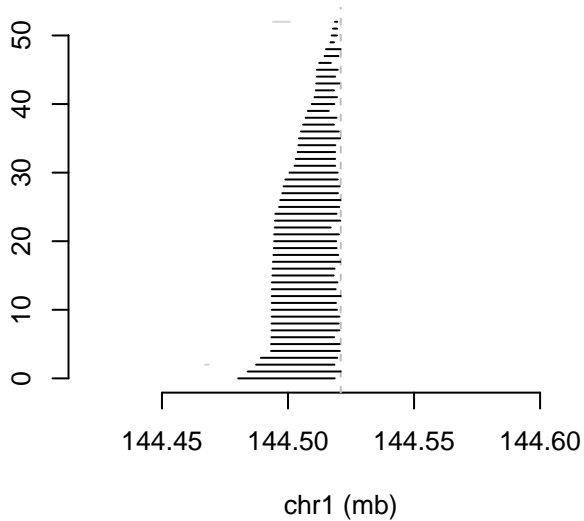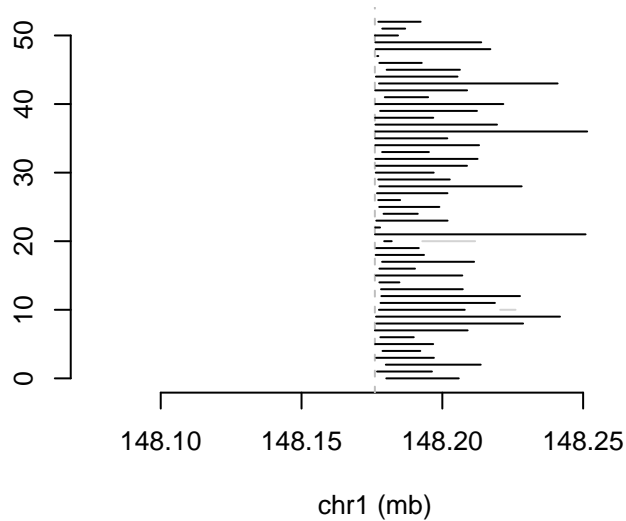

Copy number

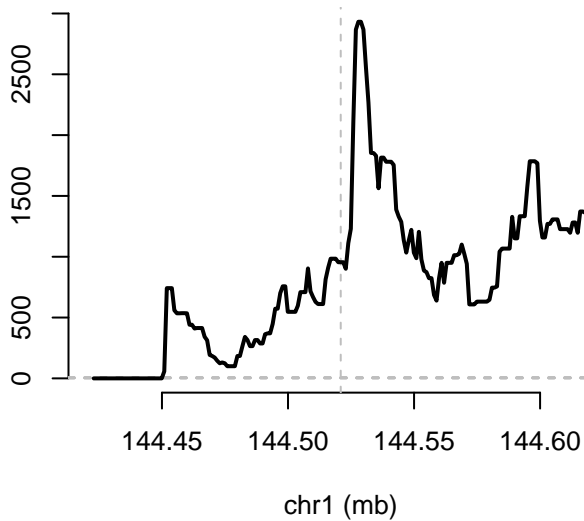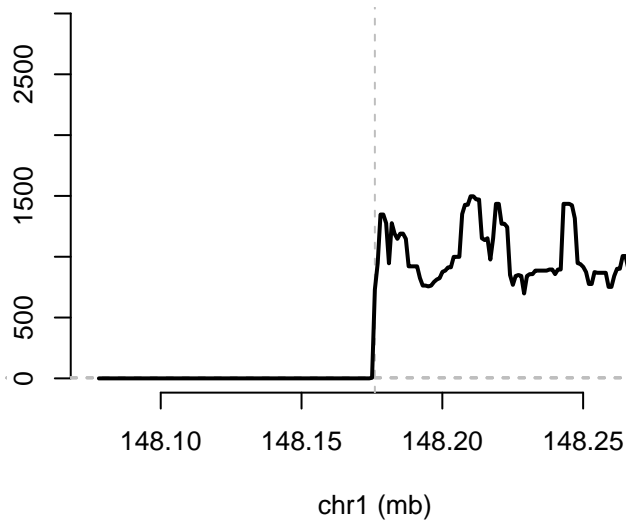

K562 chr1:144,520,916::chr1:148,176,042+-

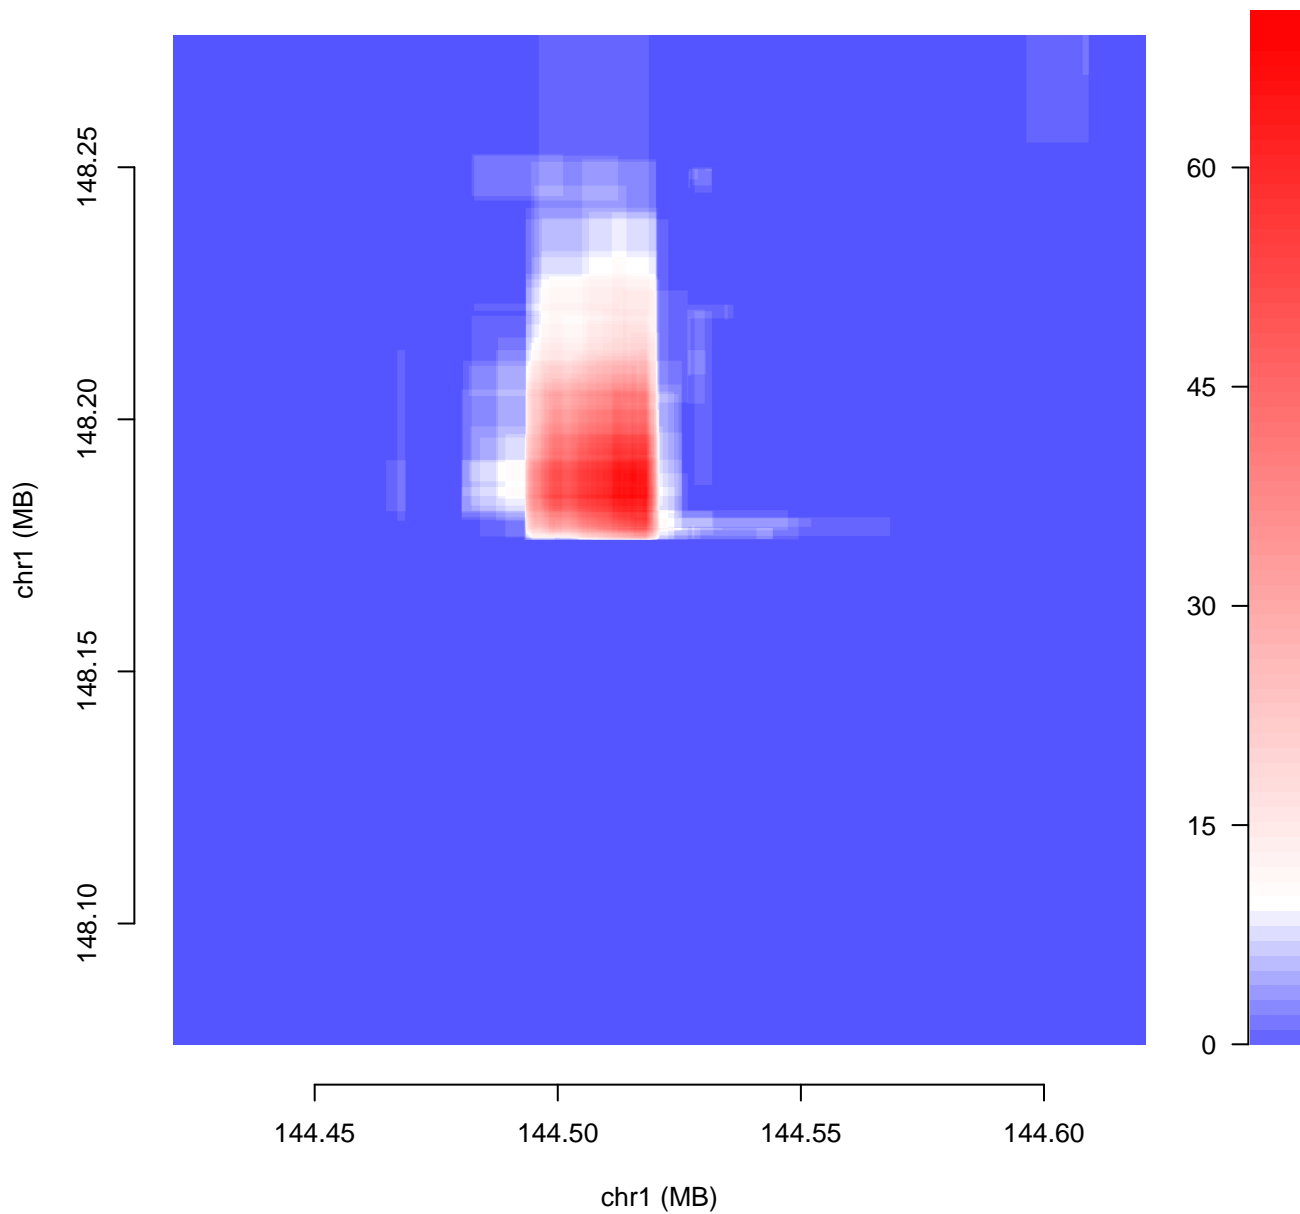

Supplement: Supplemental_Data.zip [file event_495.pdf › event_495.pdf]

Barcode

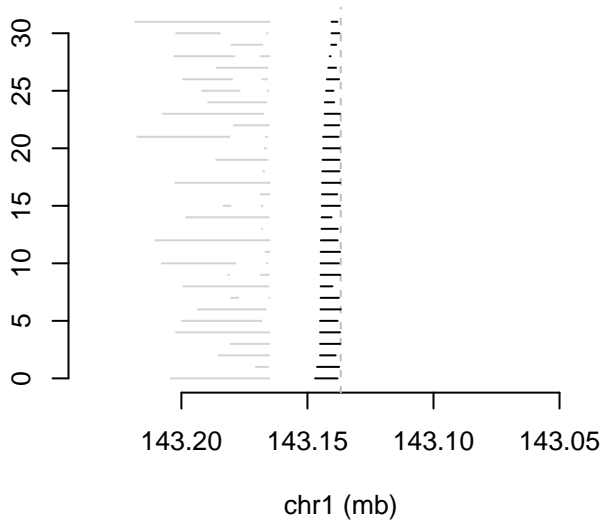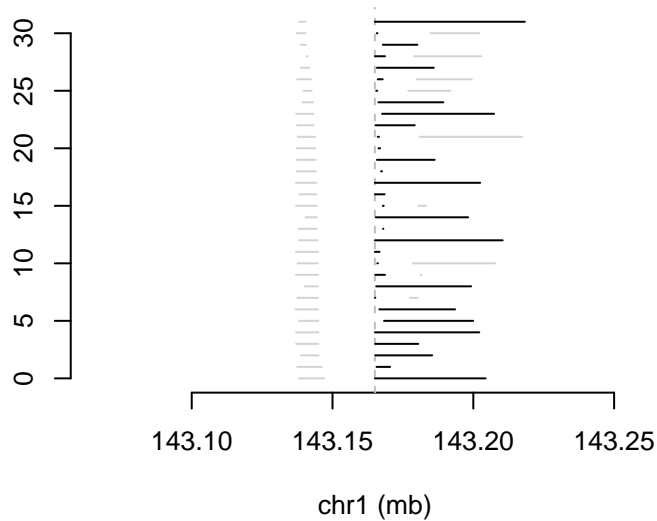

Copy number

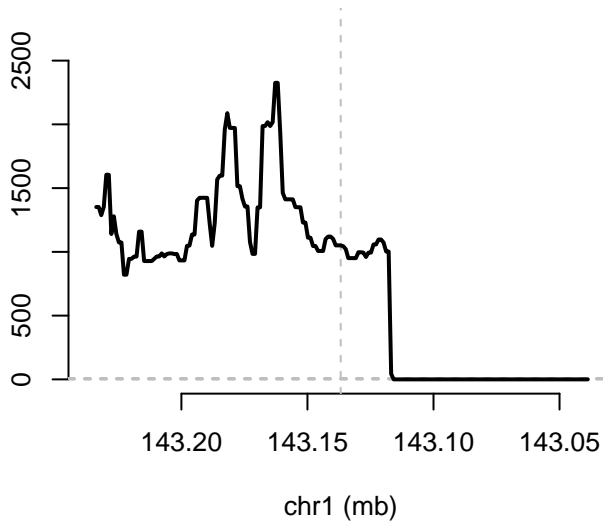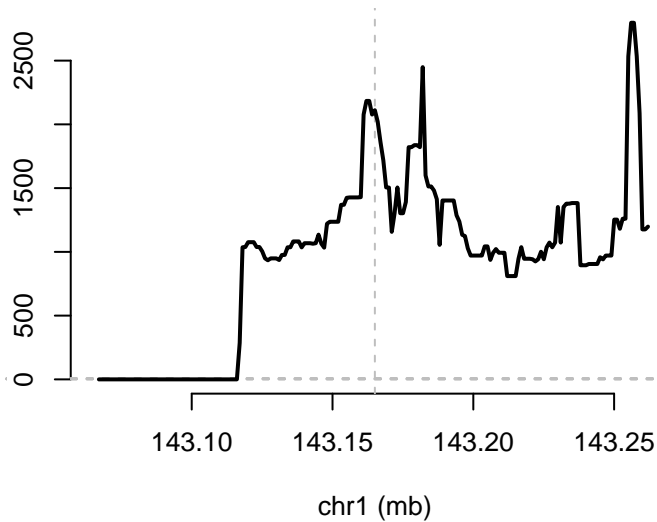

K562 chr1:143,165,036::chr1:143,136,795--

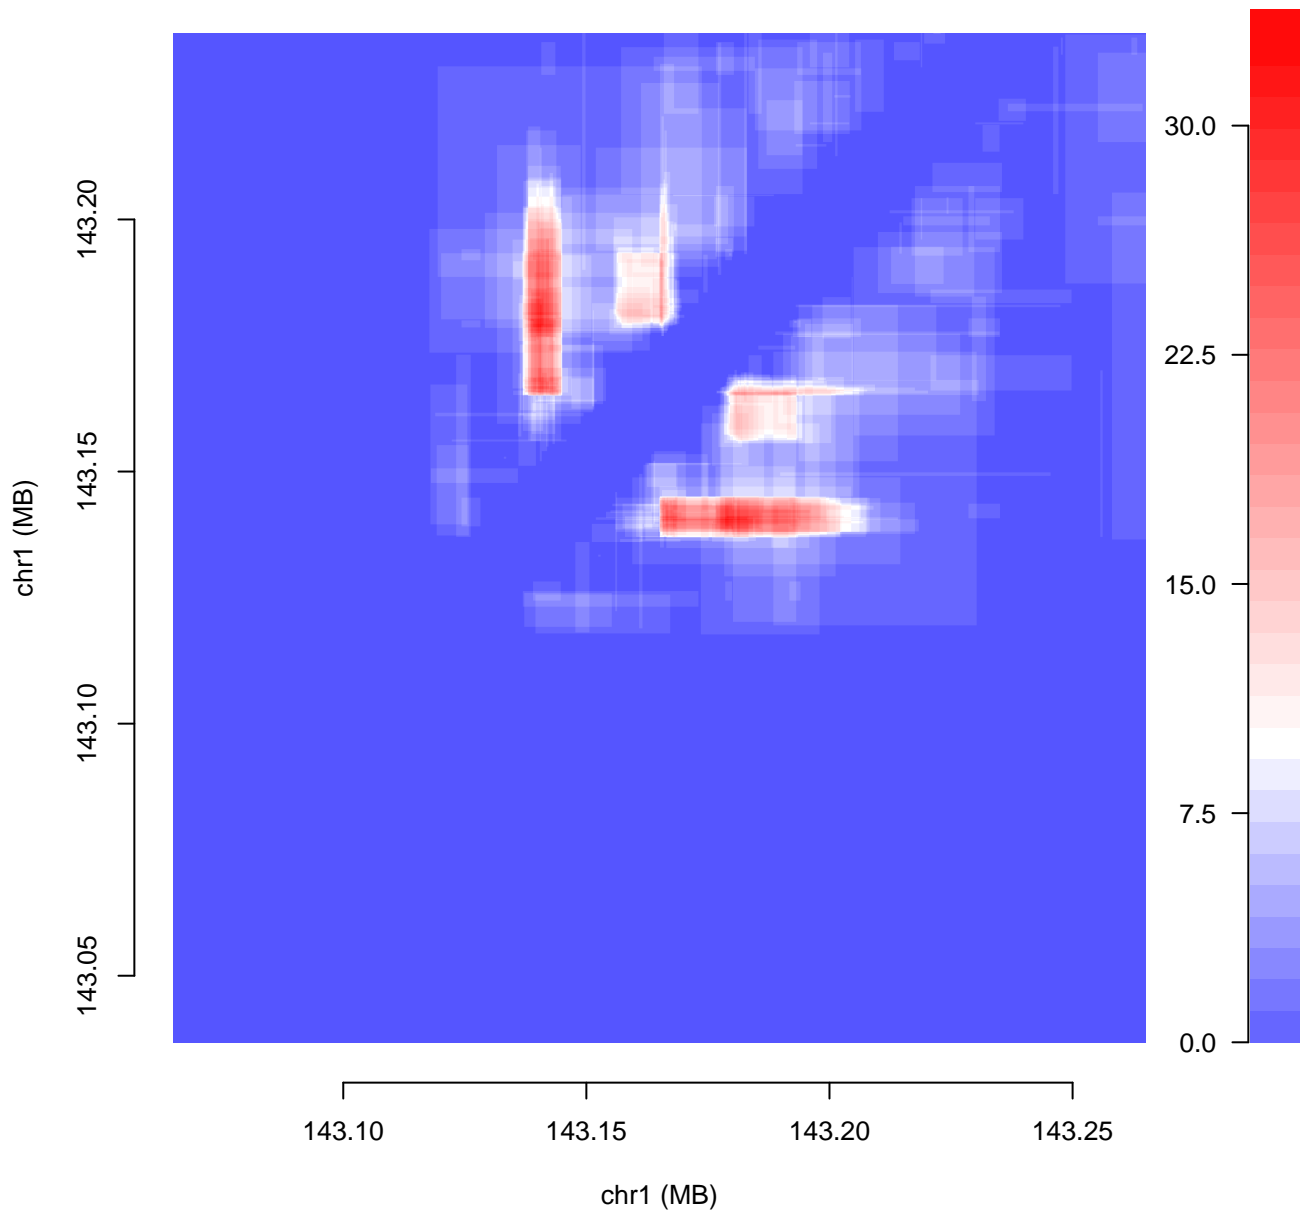

Supplement: Supplemental_Data.zip [file event_496.pdf › event_496.pdf]

Barcode

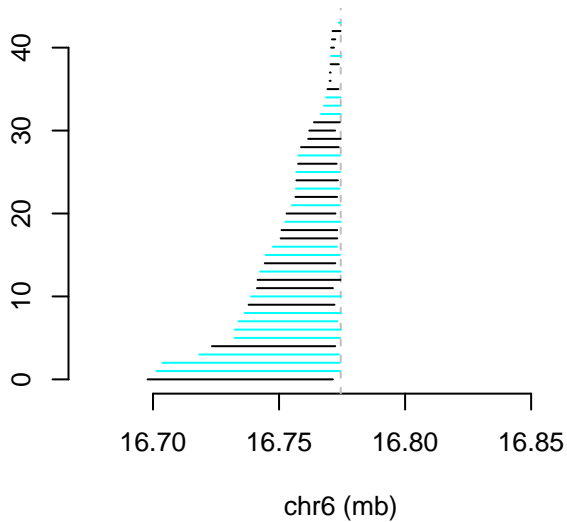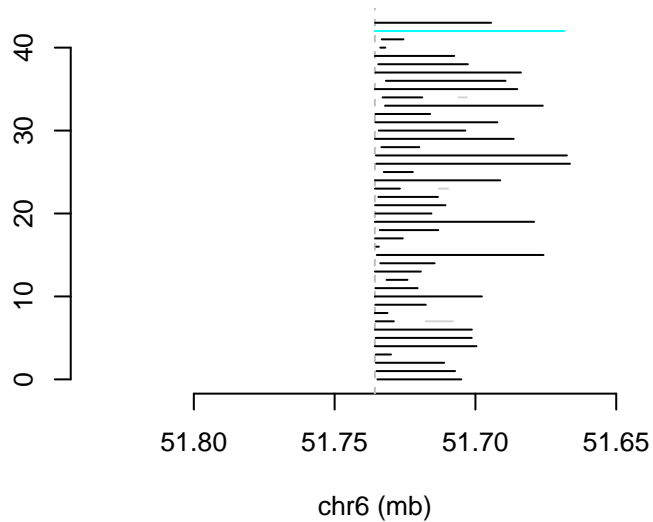

Copy number

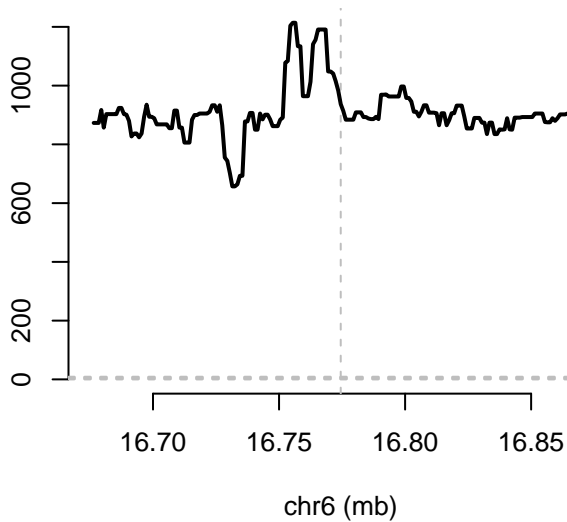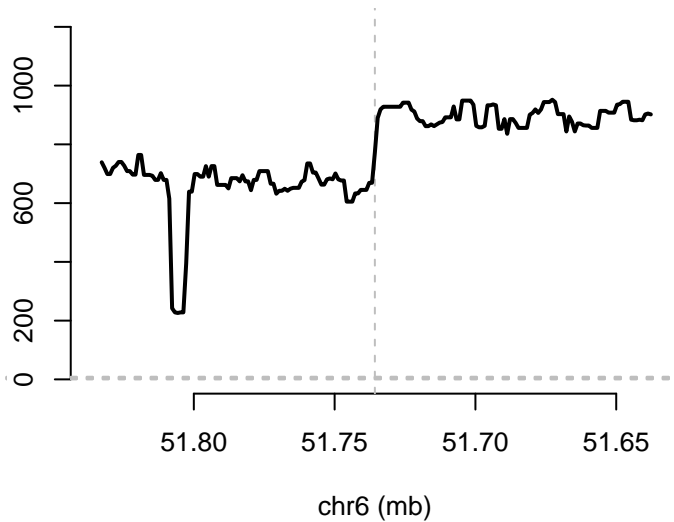

K562 chr6:16,774,472::chr6:51,735,713++

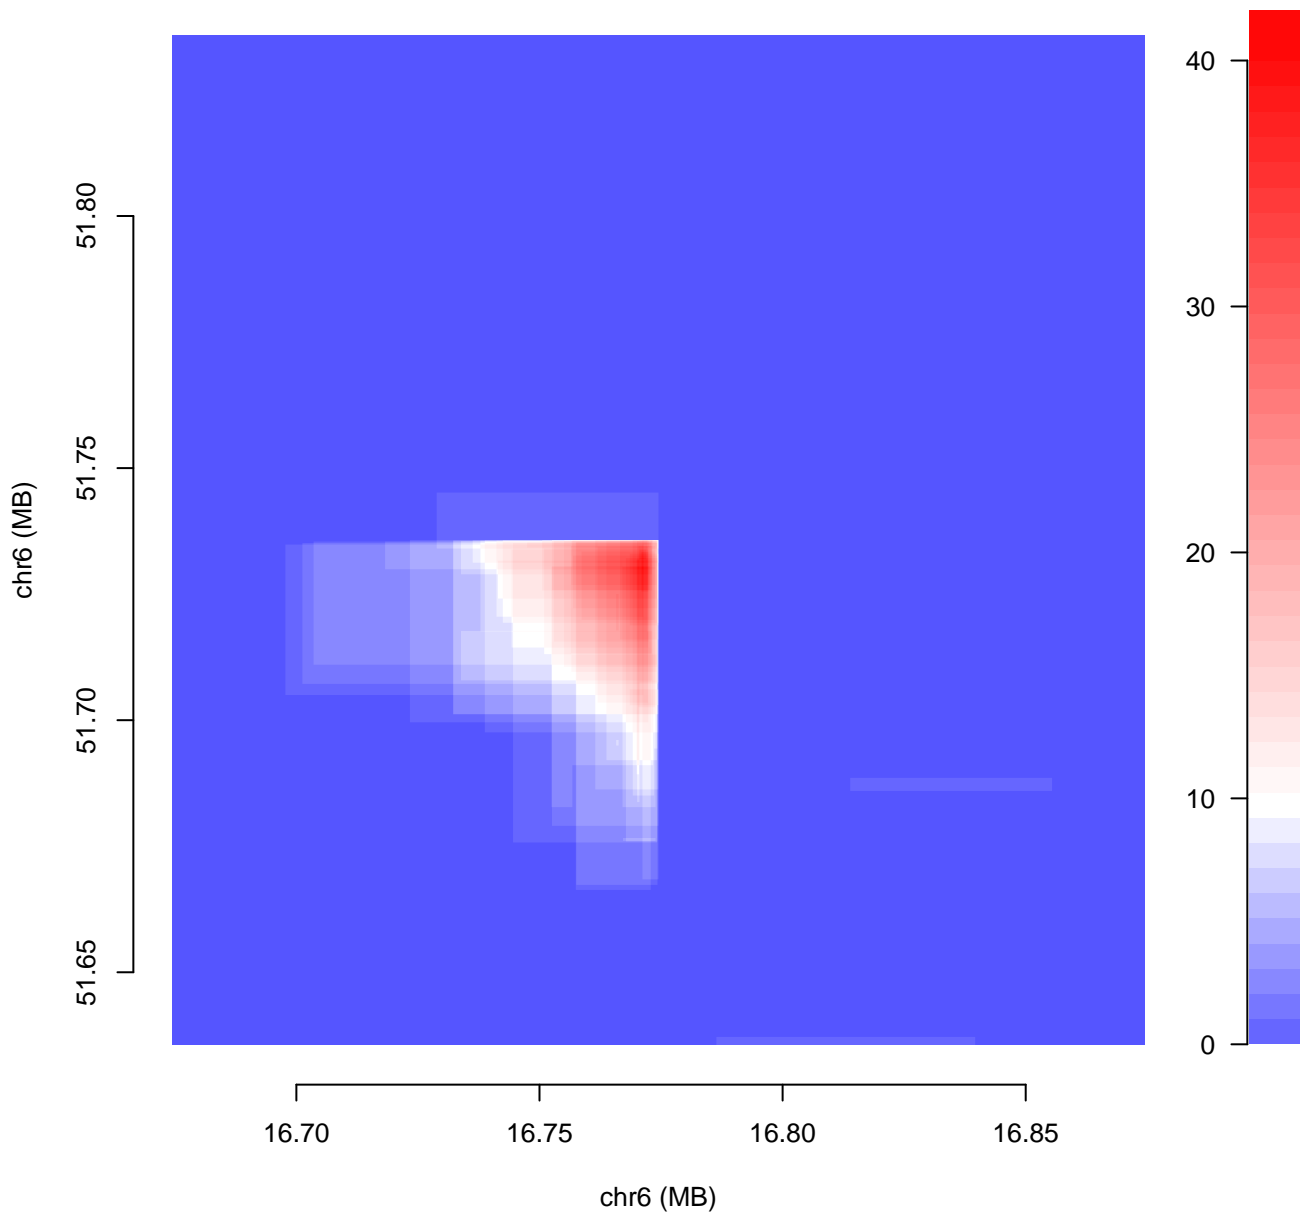

Supplement: Supplemental_Data.zip [file event_497.pdf › event_497.pdf]

Barcode

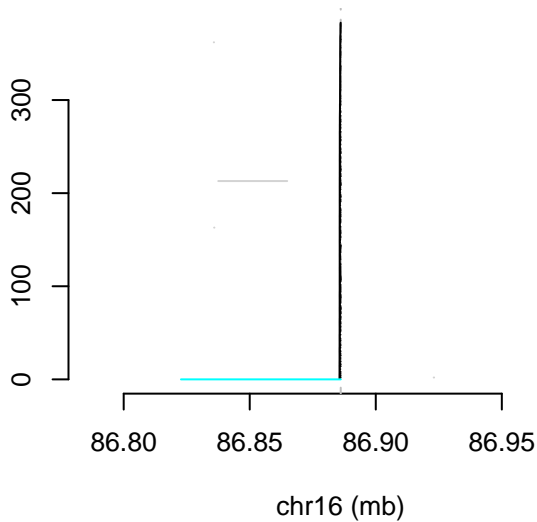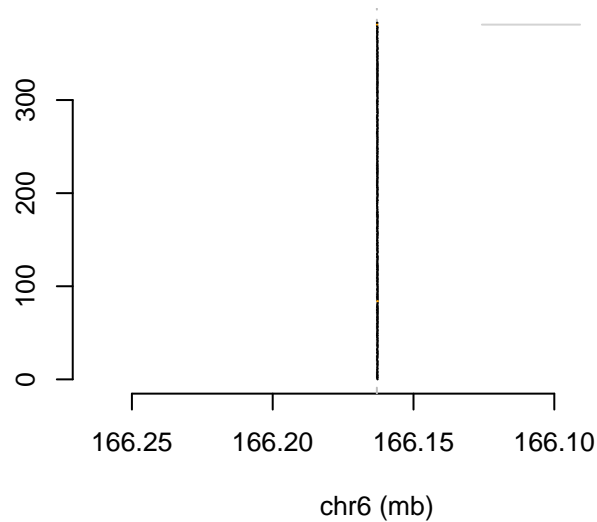

Copy number

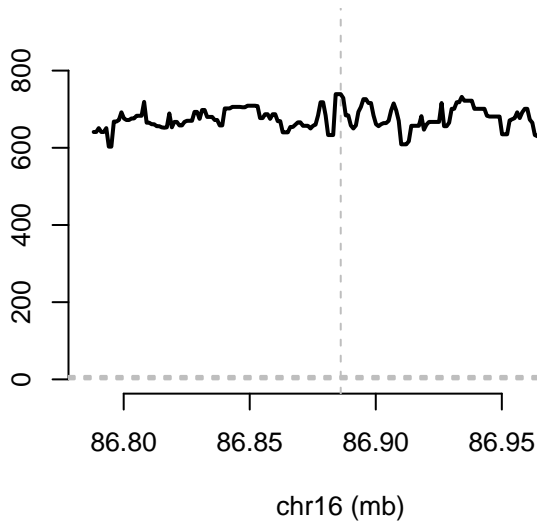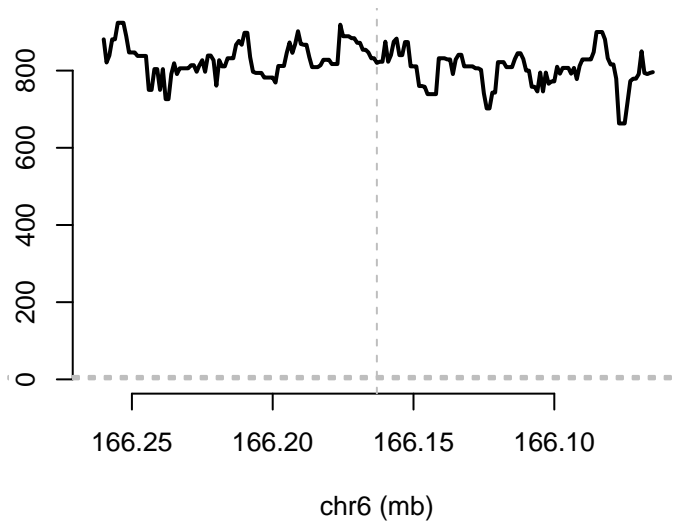

K562 chr16:86,886,103::chr6:166,163,012++

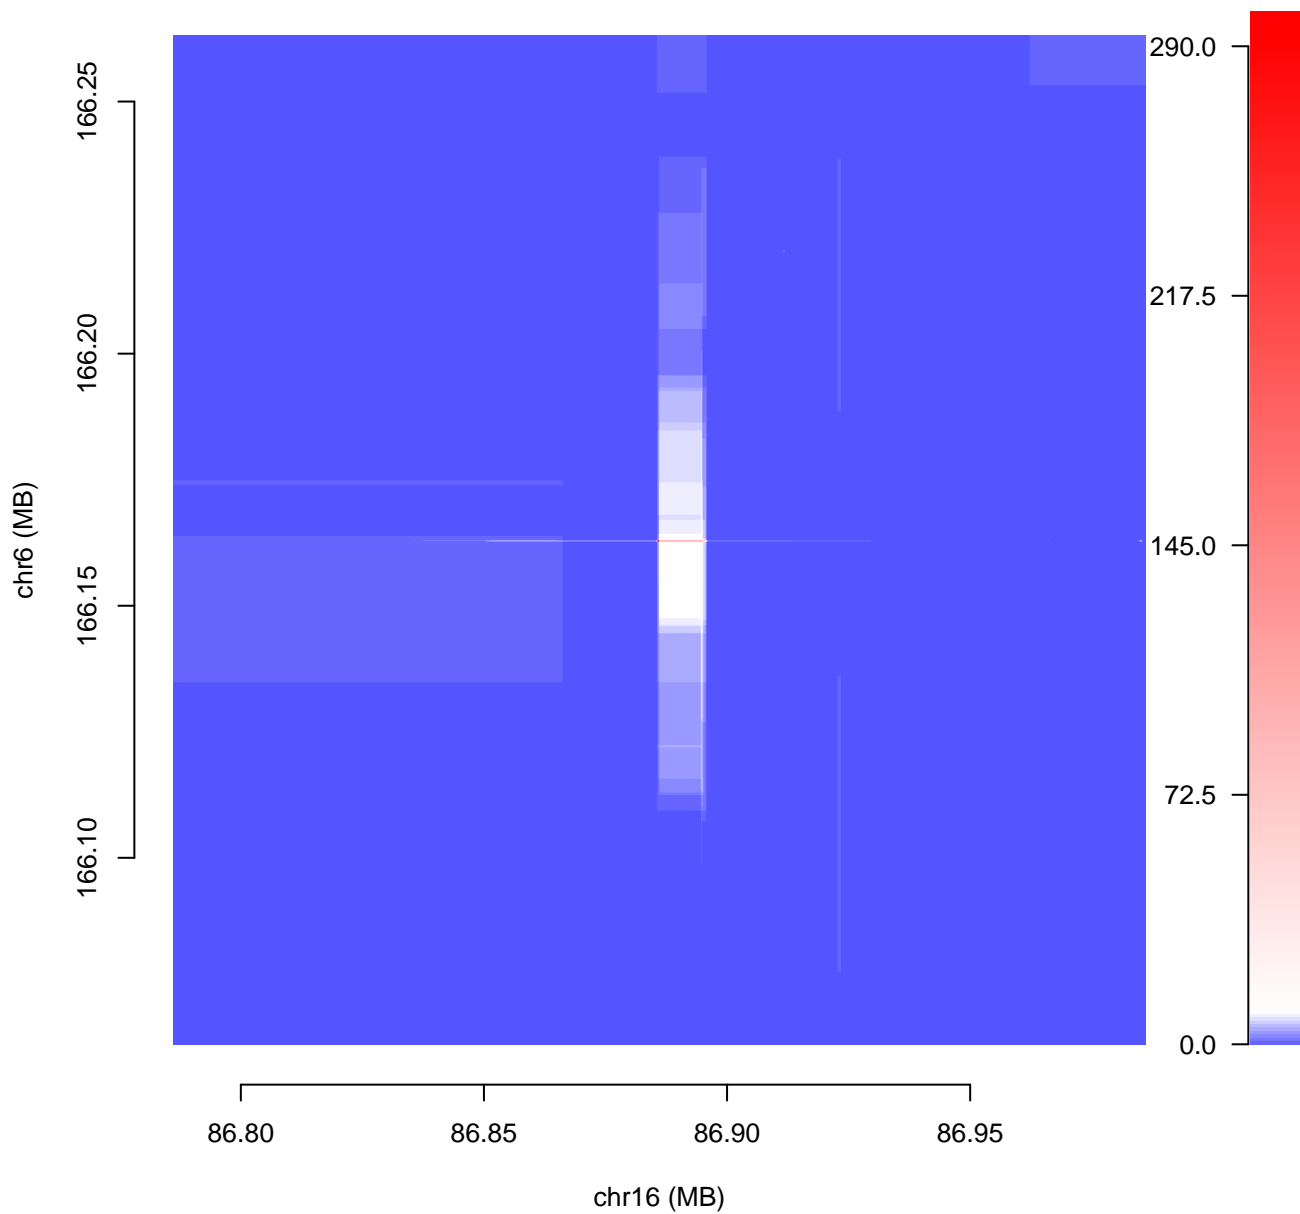

Supplement: Supplemental_Data.zip [file event_498.pdf › event_498.pdf]

Barcode

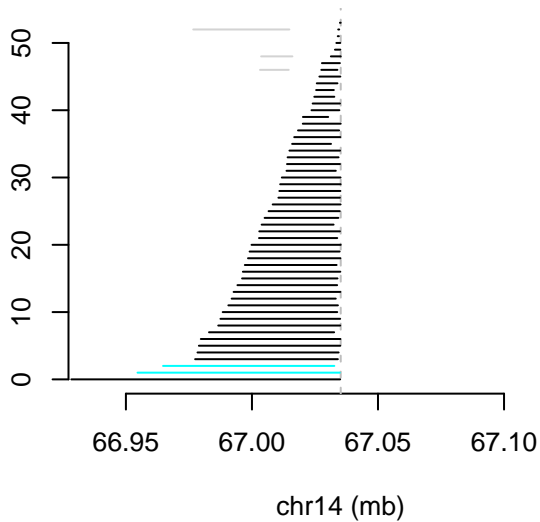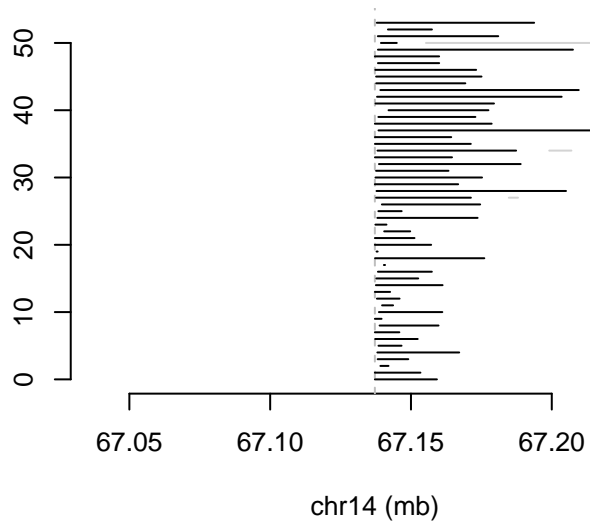

Copy number

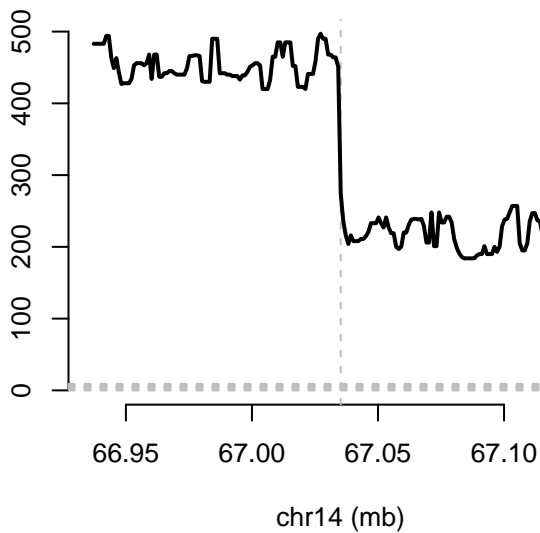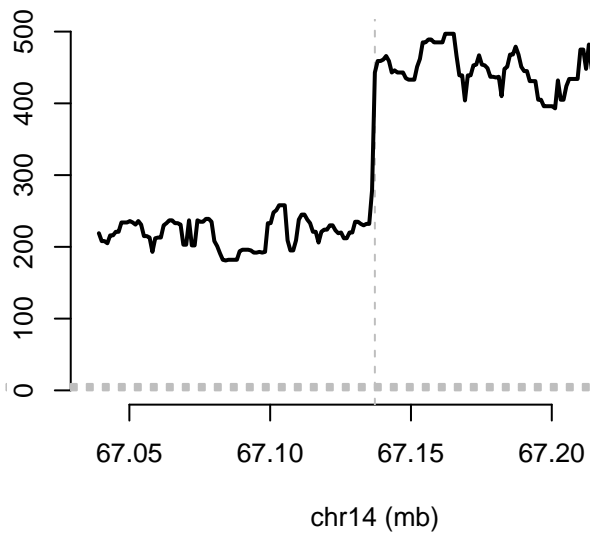

K562 chr14:67,137,184::chr14:67,035,223-+

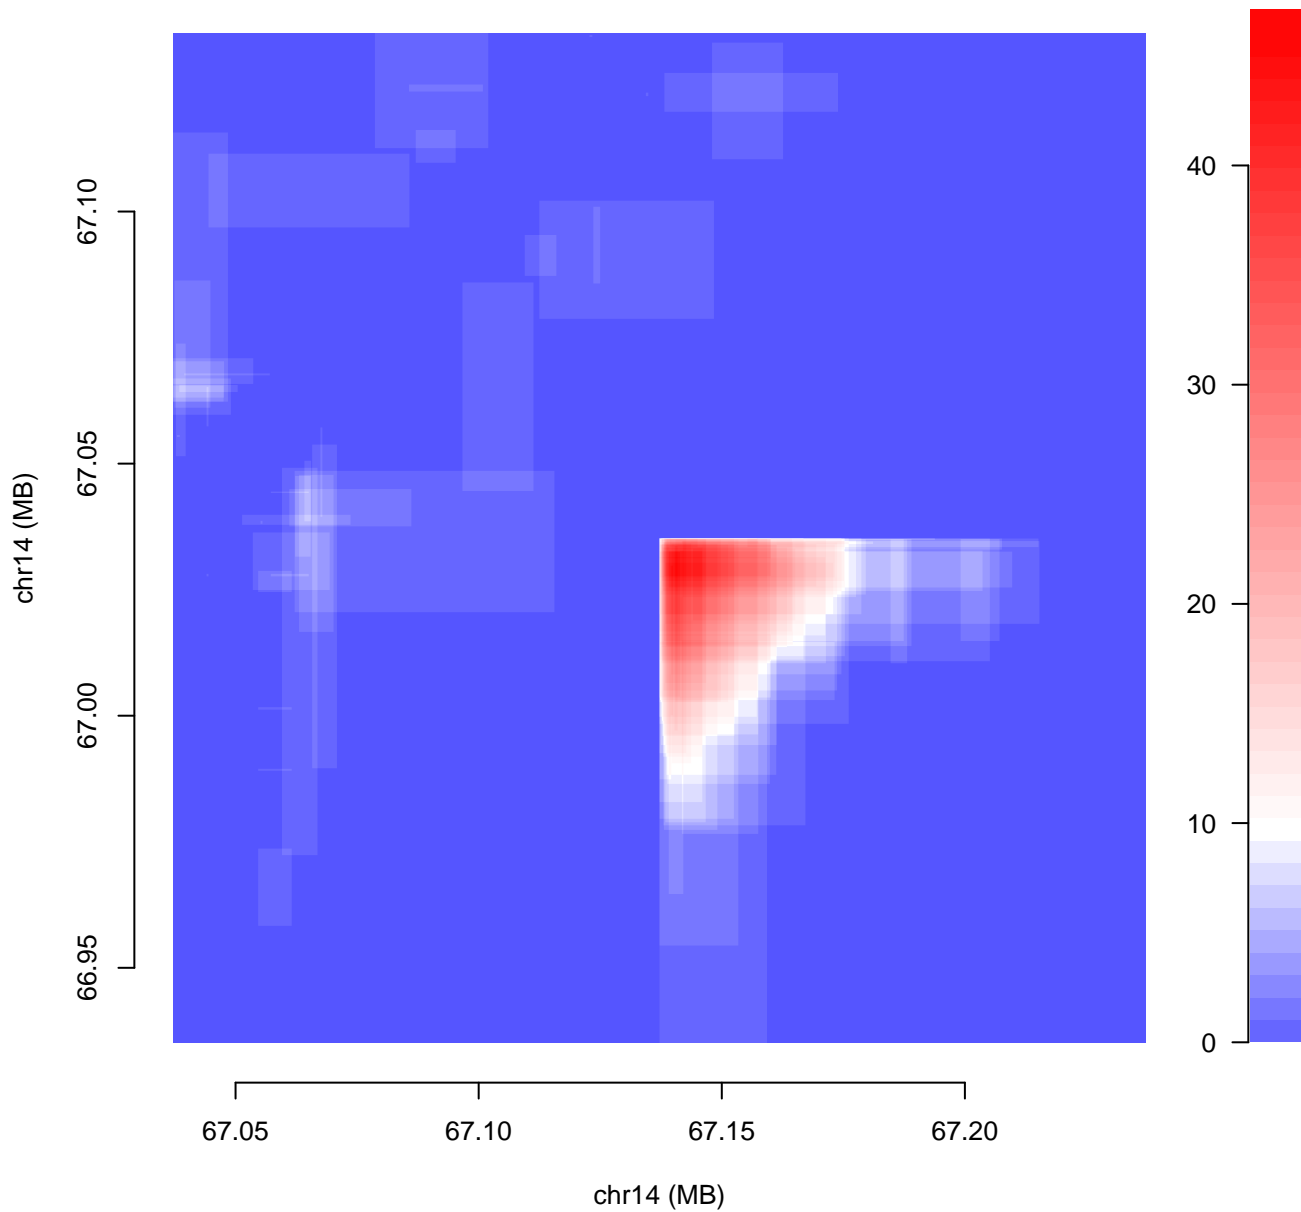

Supplement: Supplemental_Data.zip [file event_499.pdf › event_499.pdf]

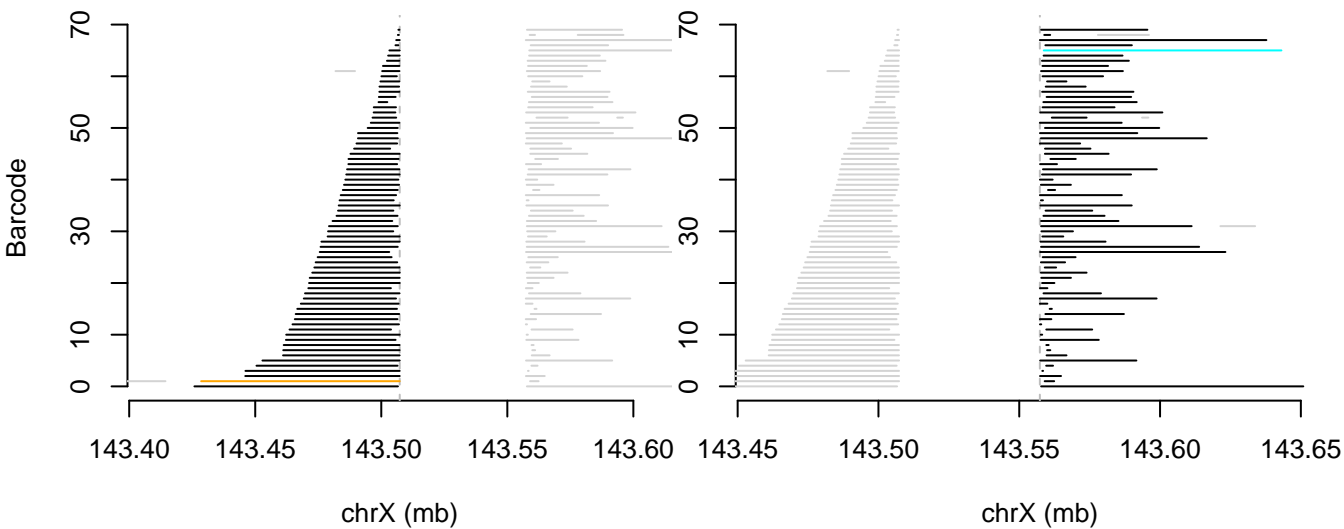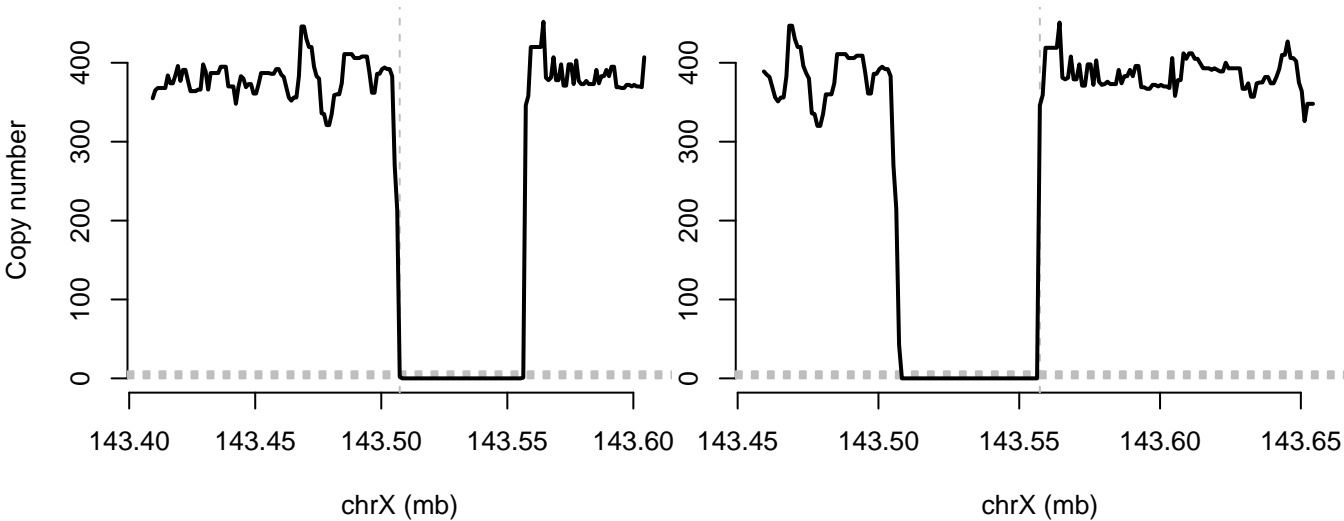

K562 chrX:143,507,324::chrX:143,557,323+-

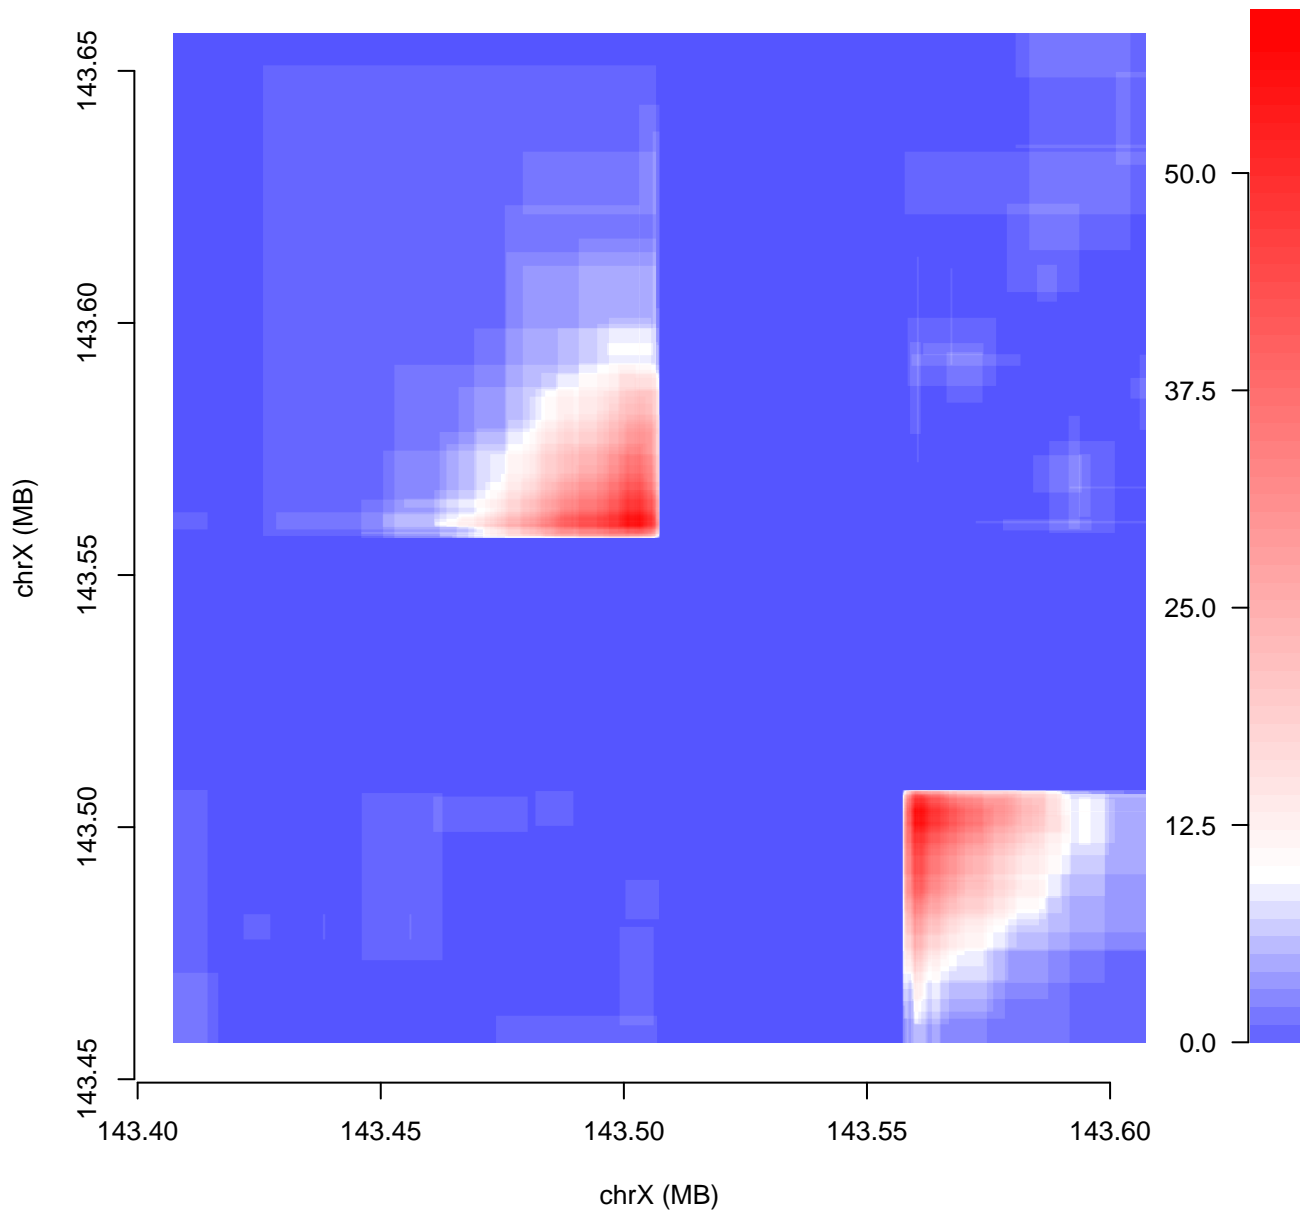

Supplement: Supplemental_Data.zip [file event_5.pdf › event_5.pdf]

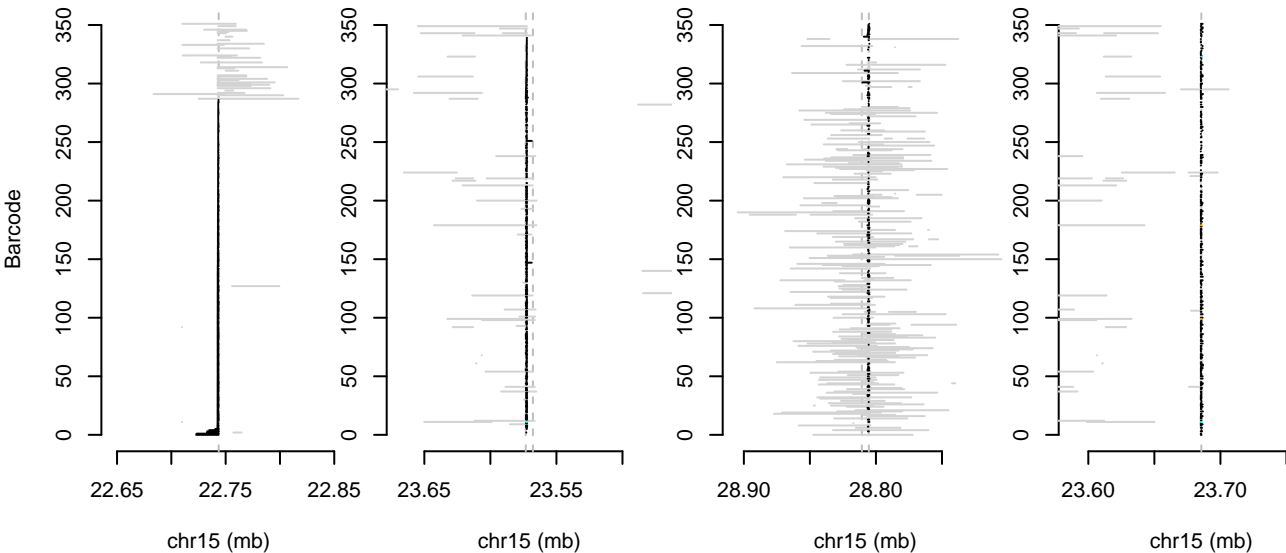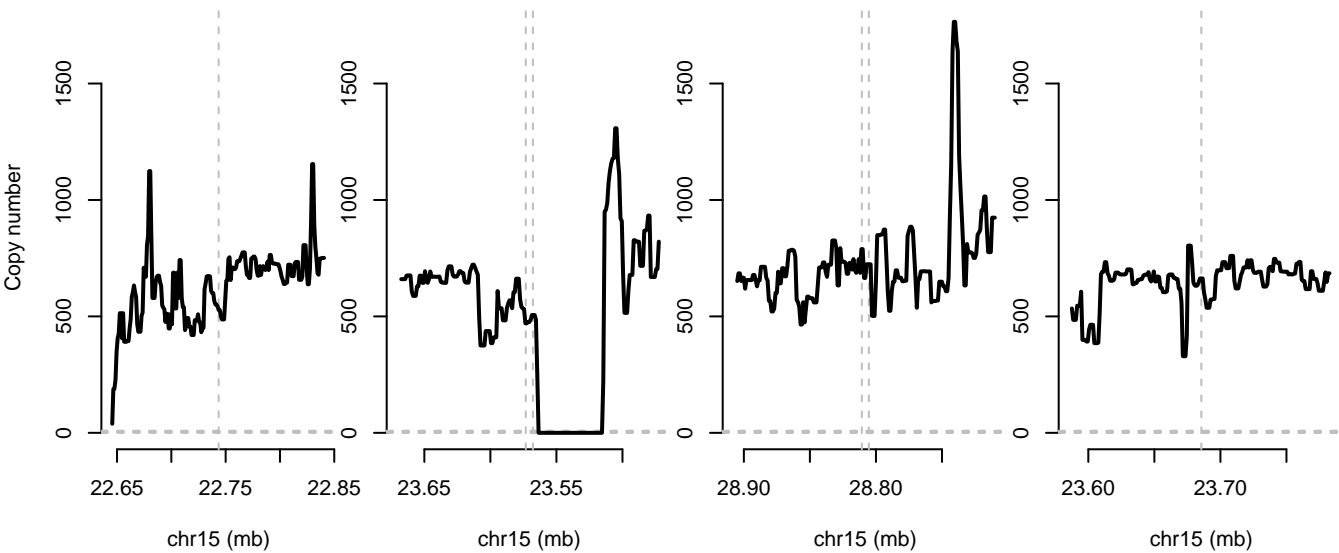

K562 chr15:23,685,557::chr15:28,805,378--

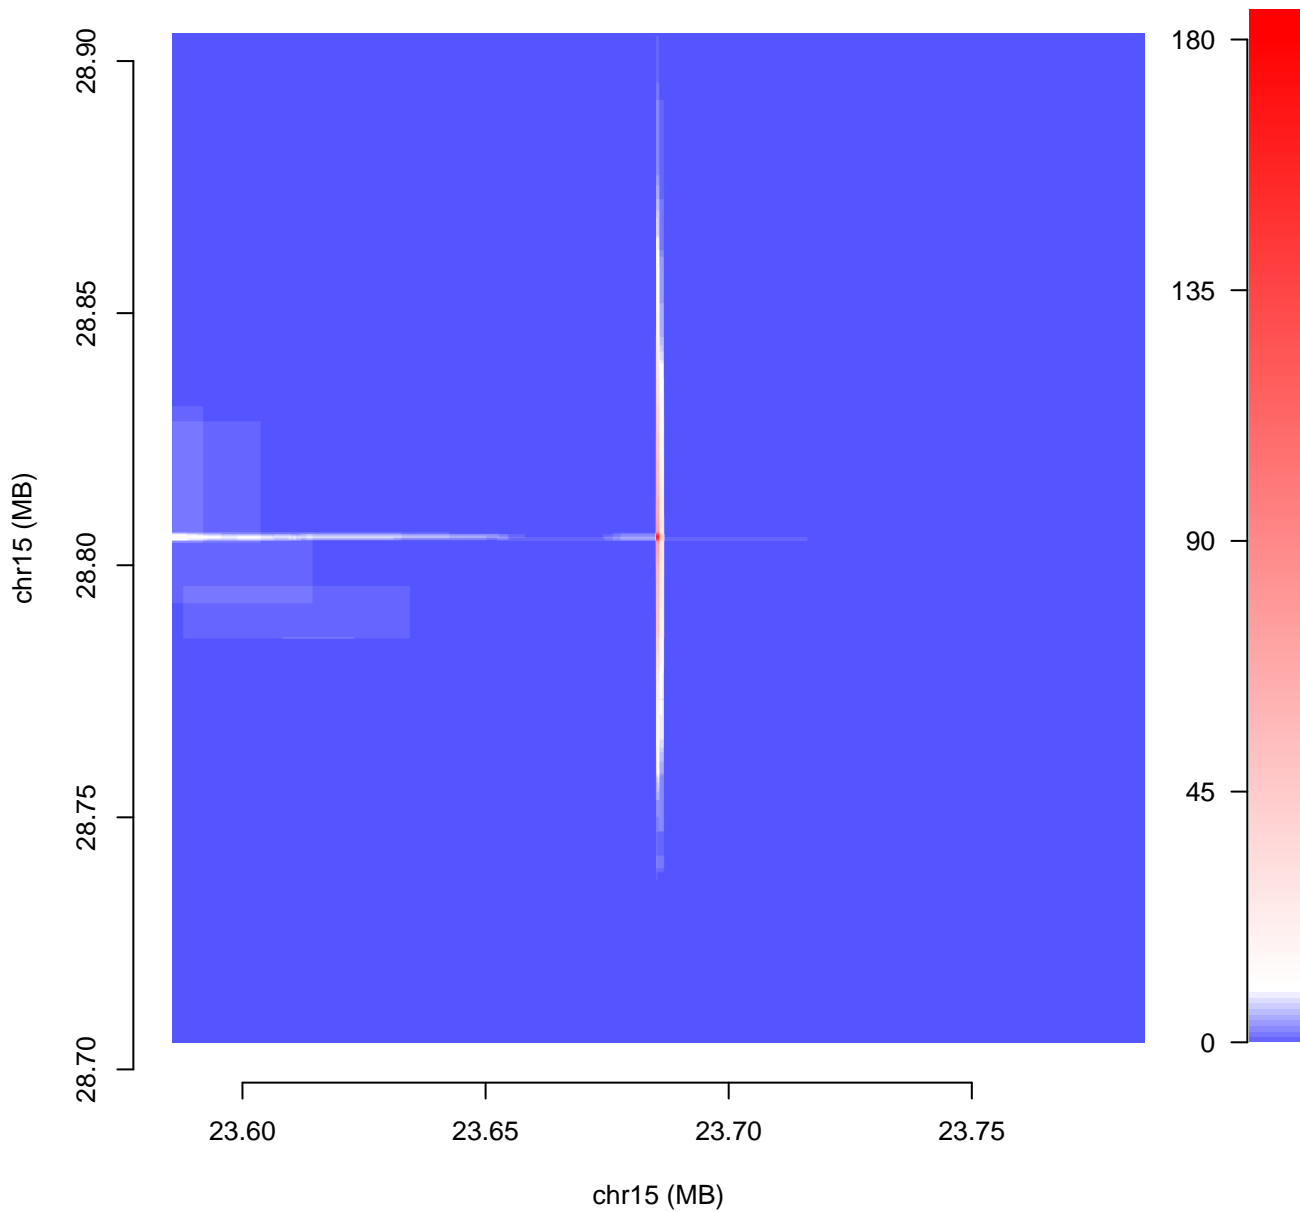

K562 chr15:28,810,681::chr15:23,567,809+-

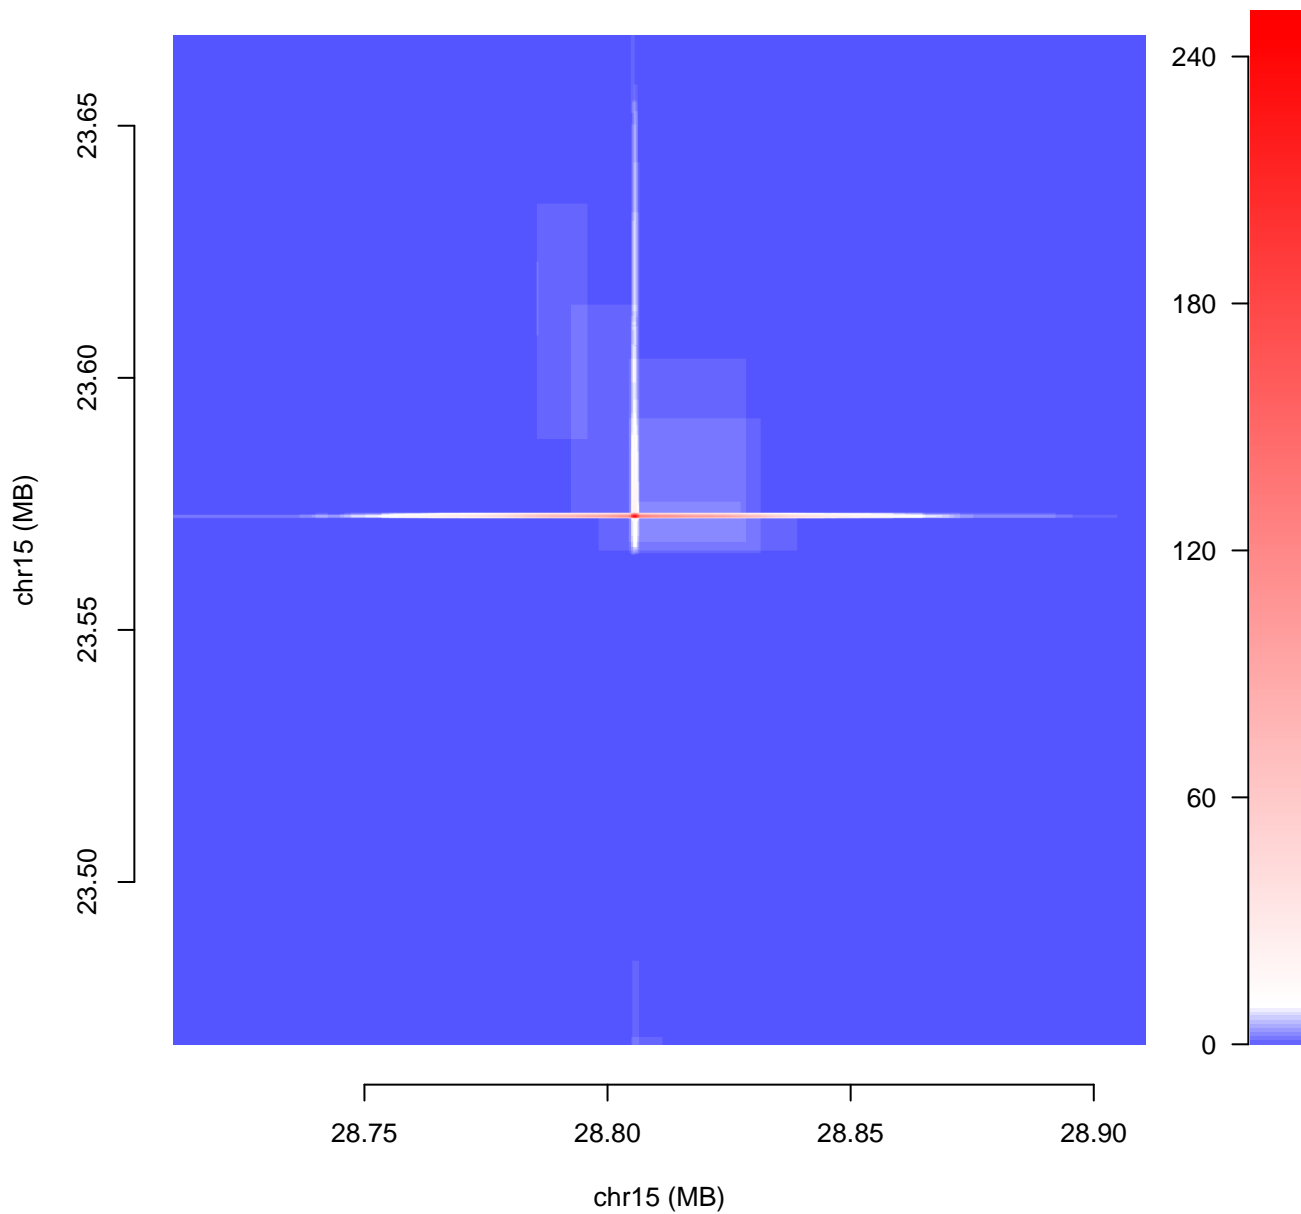

K562 chr15:28,810,681::chr15:28,805,378+-

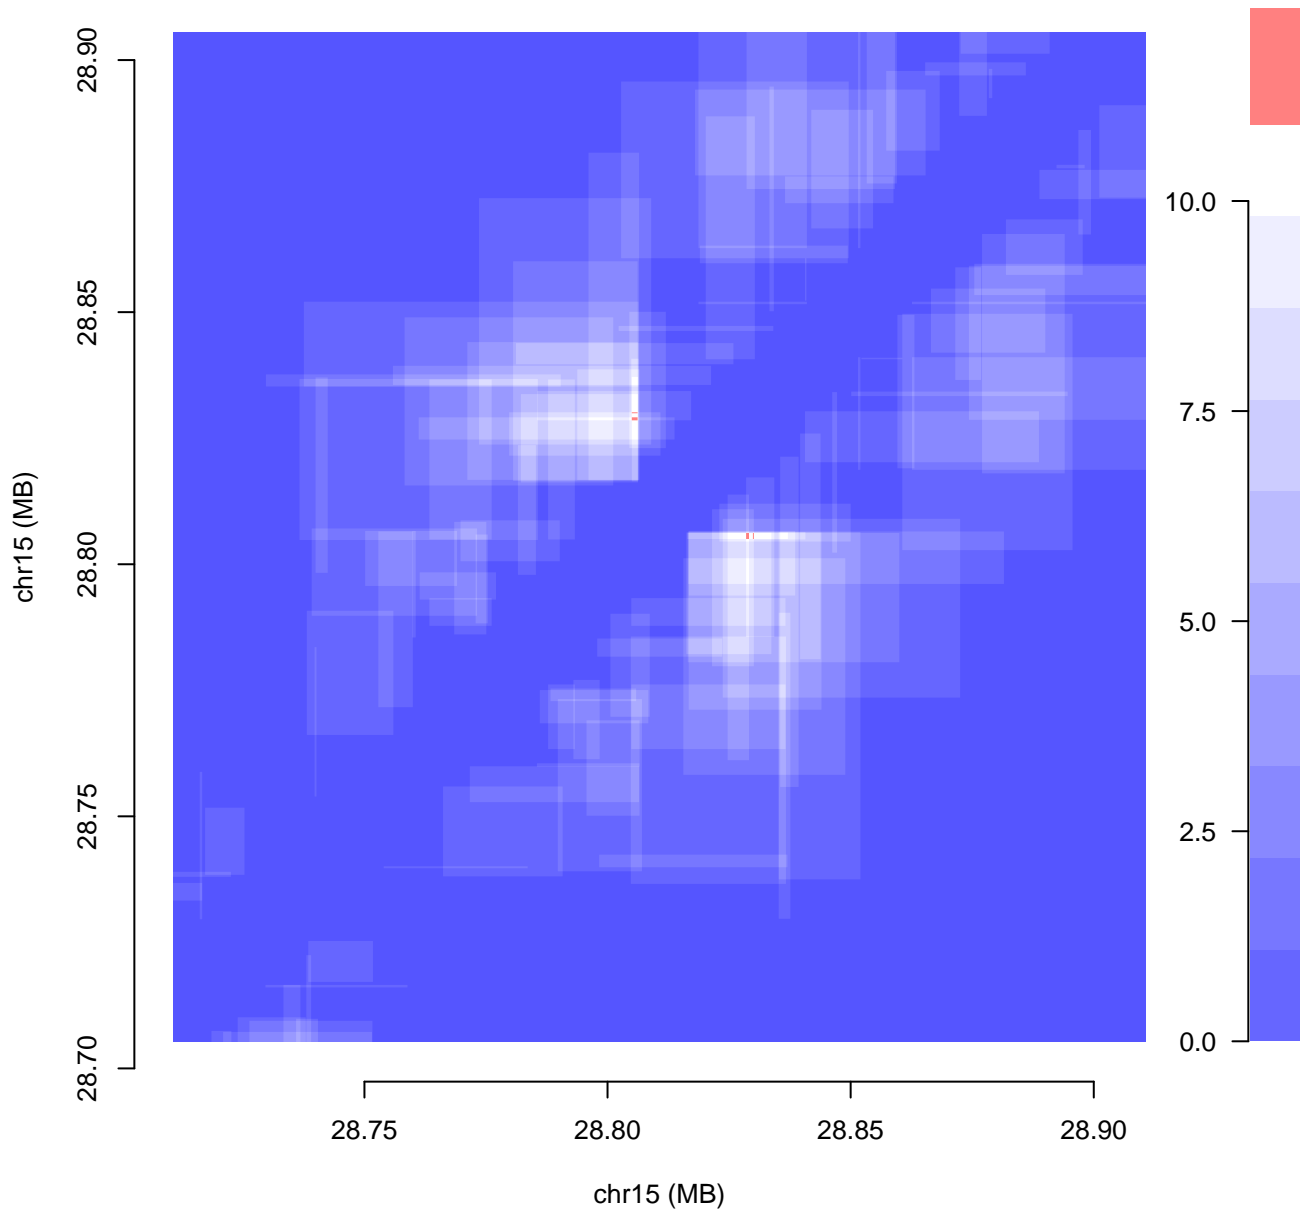

K562 chr15:23,567,809::chr15:23,573,194-+

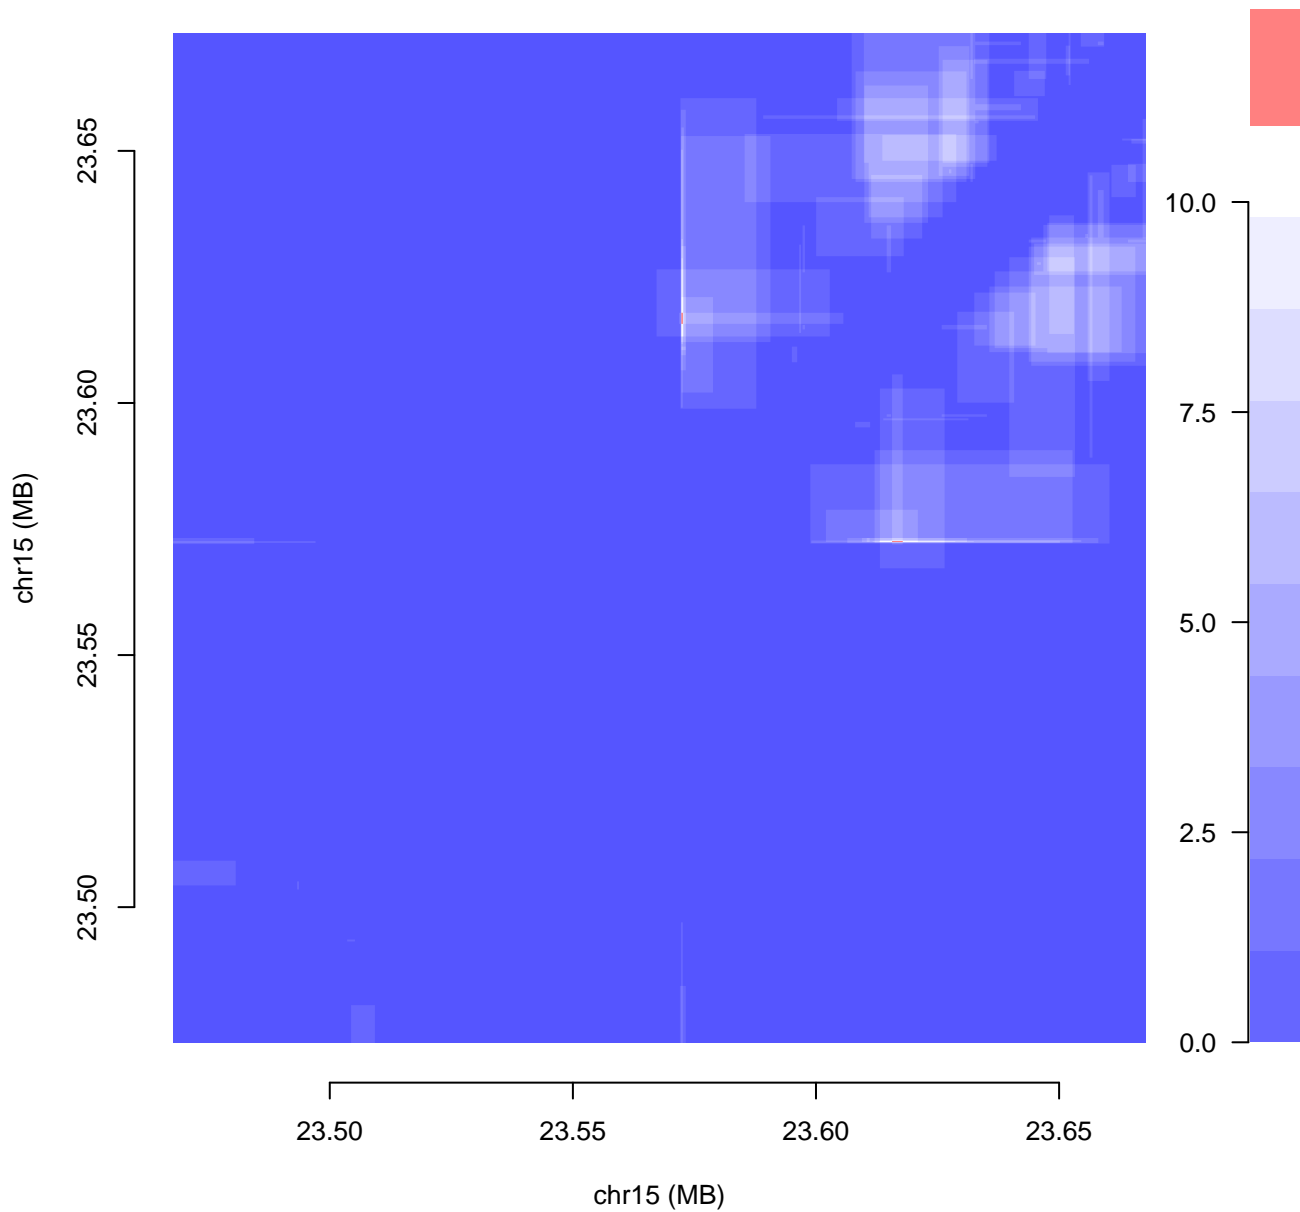

K562 chr15:22,743,588::chr15:23,573,194++

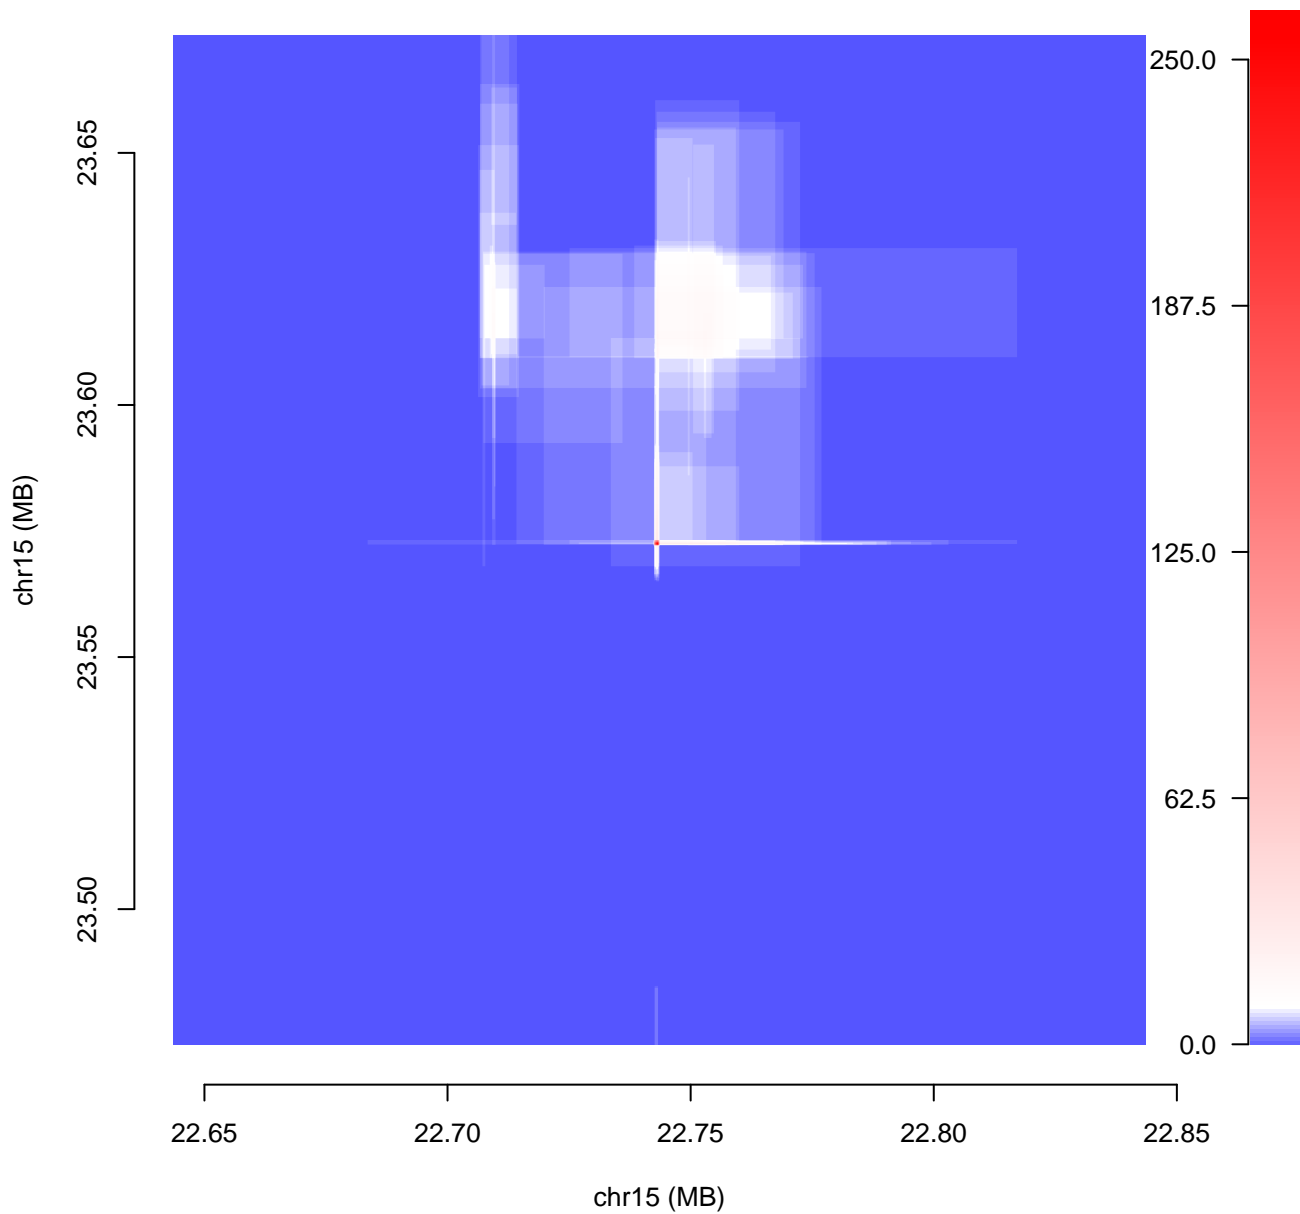

Supplement: Supplemental_Data.zip [file event_50.pdf › event_50.pdf]

Barcode

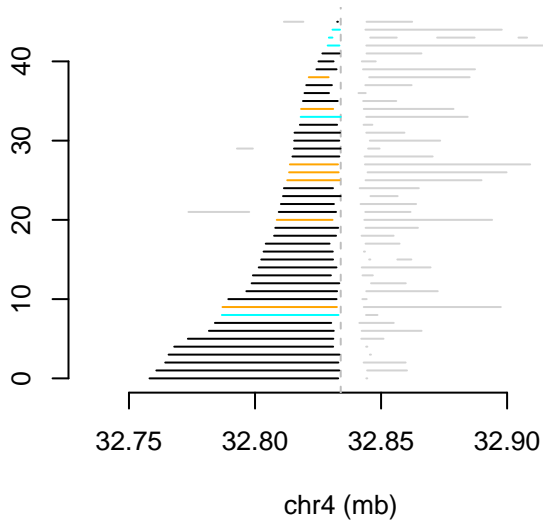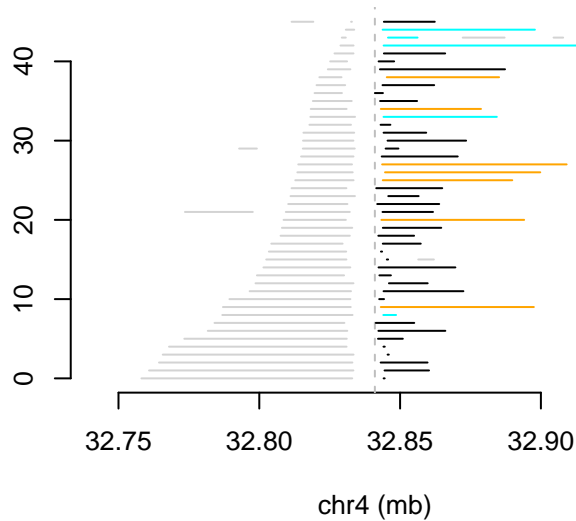

Copy number

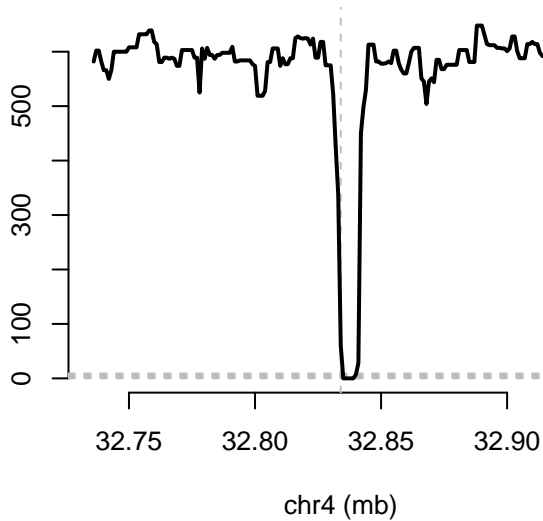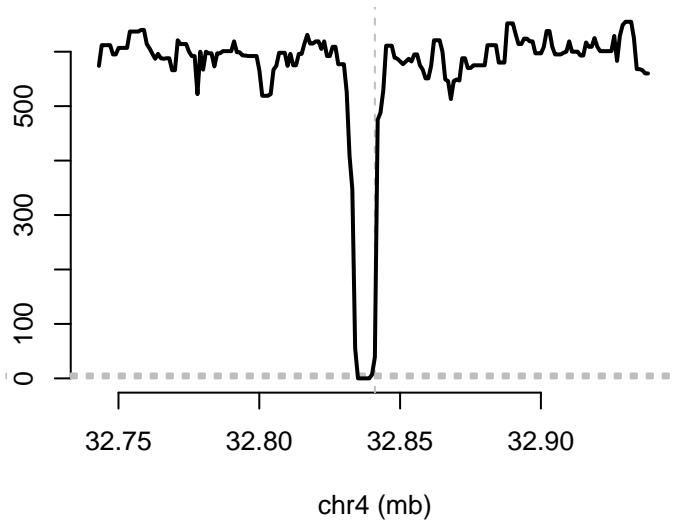

K562 chr4:32,834,004::chr4:32,841,043+-

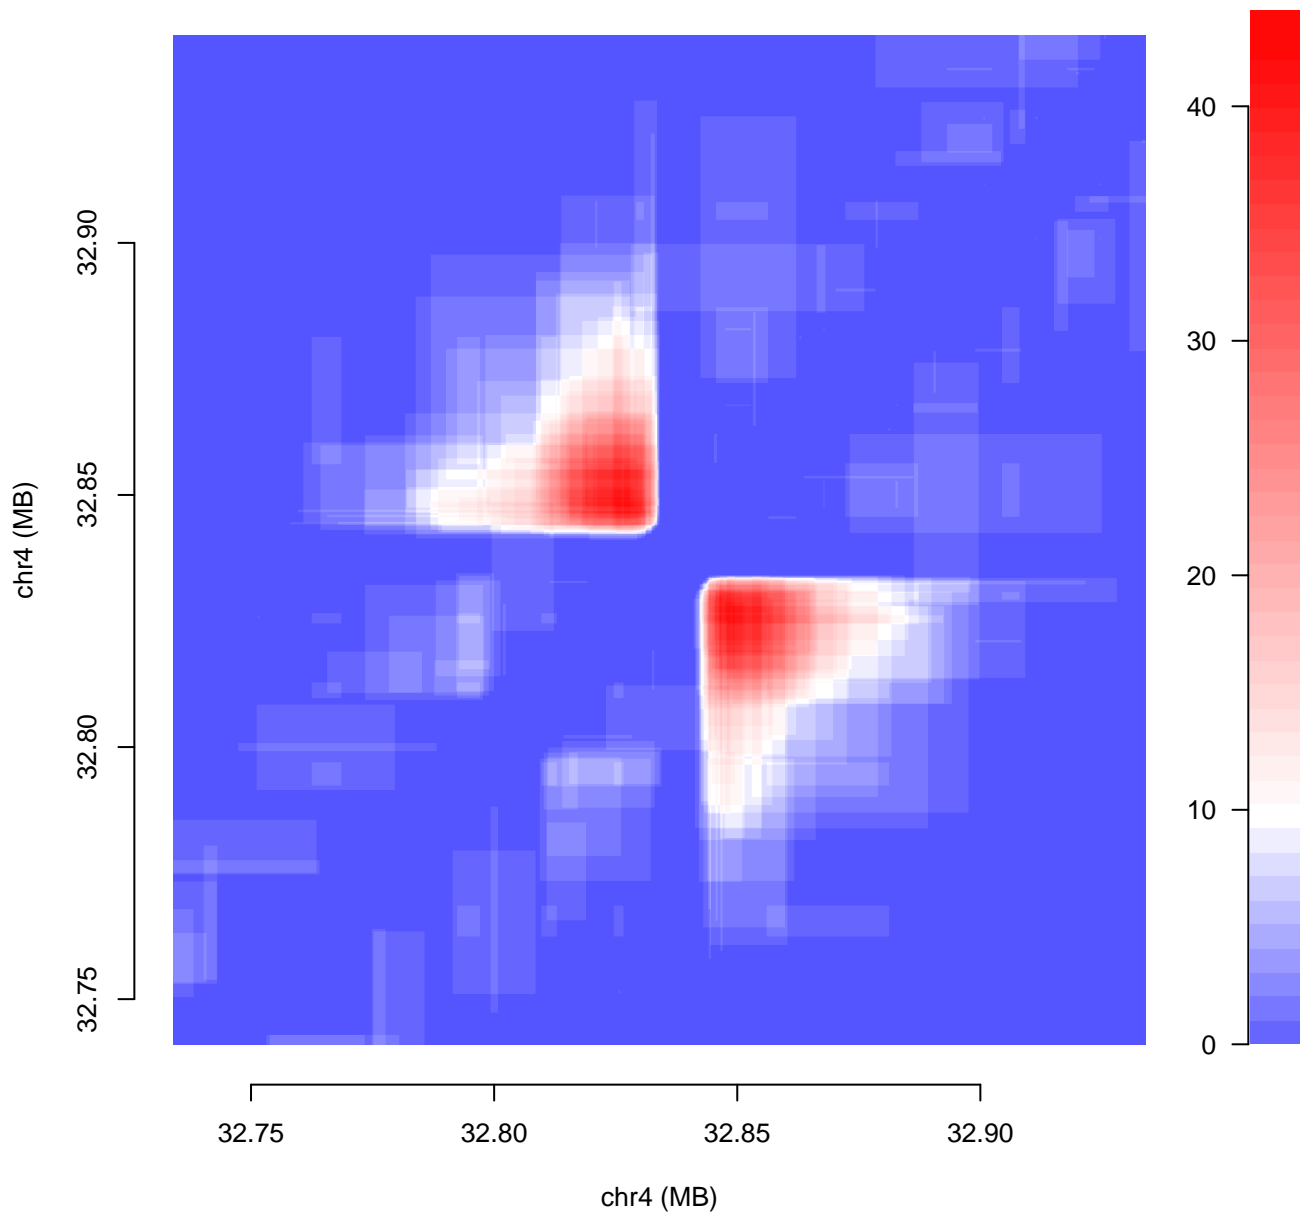

Supplement: Supplemental_Data.zip [file event_500.pdf › event_500.pdf]

Barcode

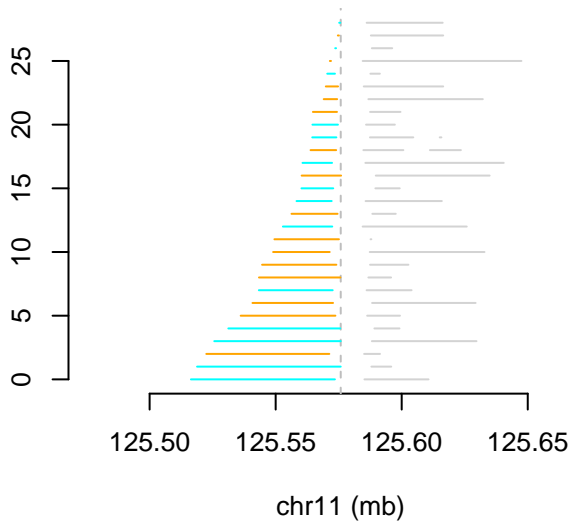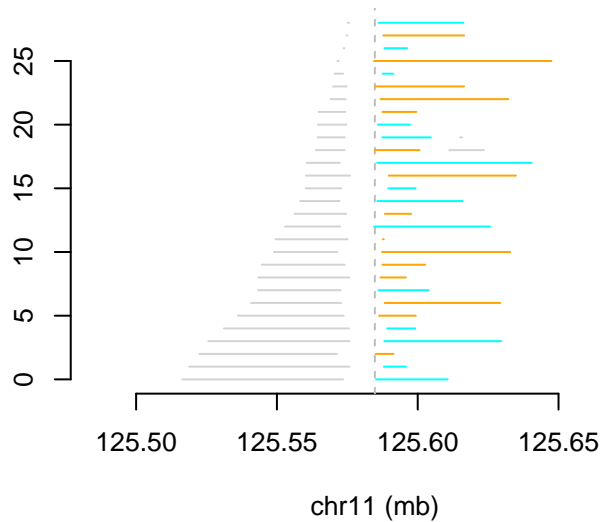

Copy number

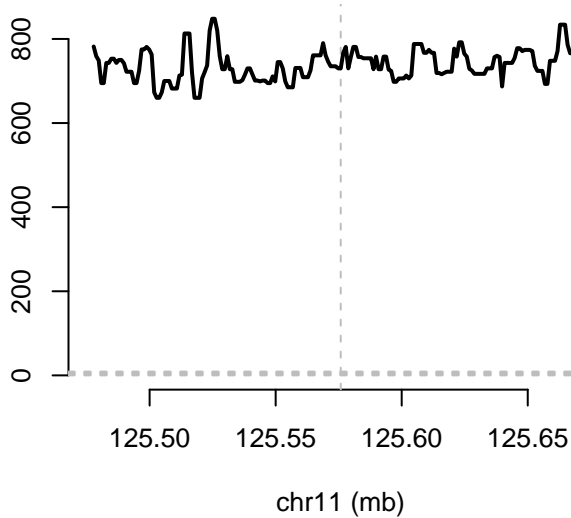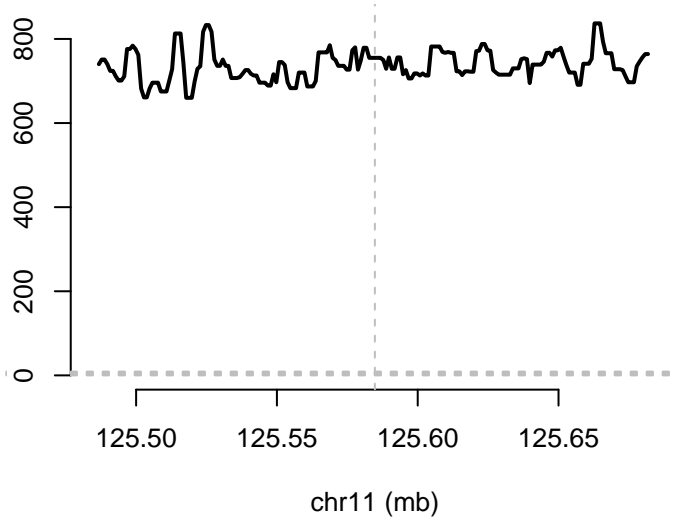

K562 chr11:125,575,818::chr11:125,584,788+-

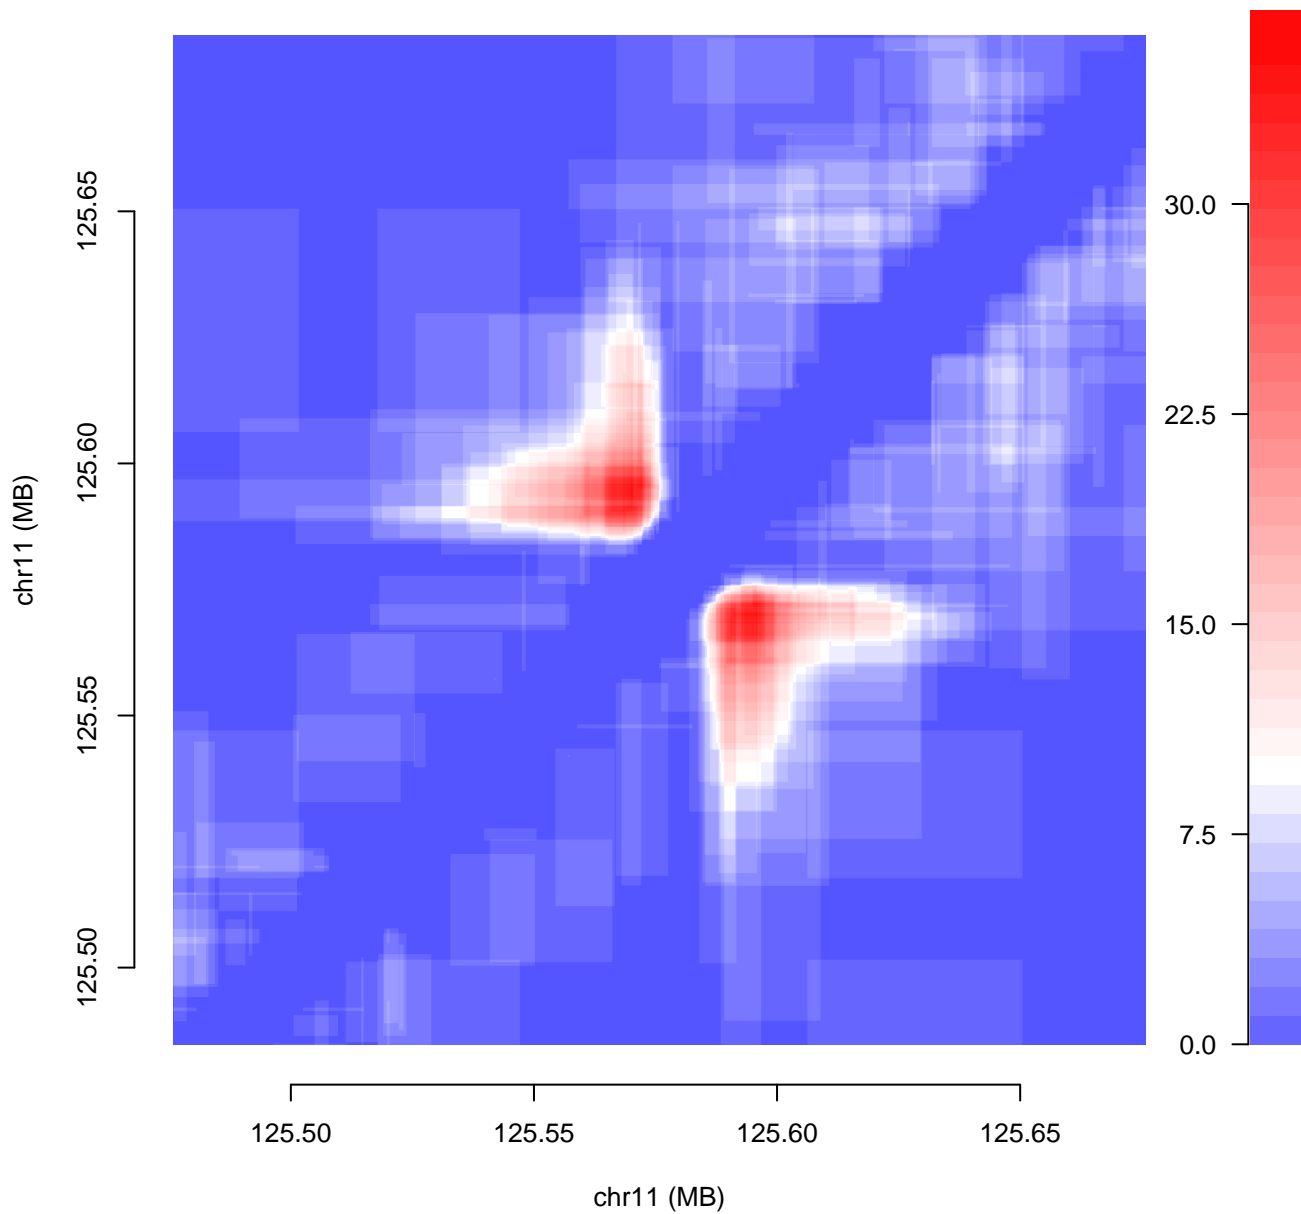

Supplement: Supplemental_Data.zip [file event_501.pdf › event_501.pdf]

Barcode

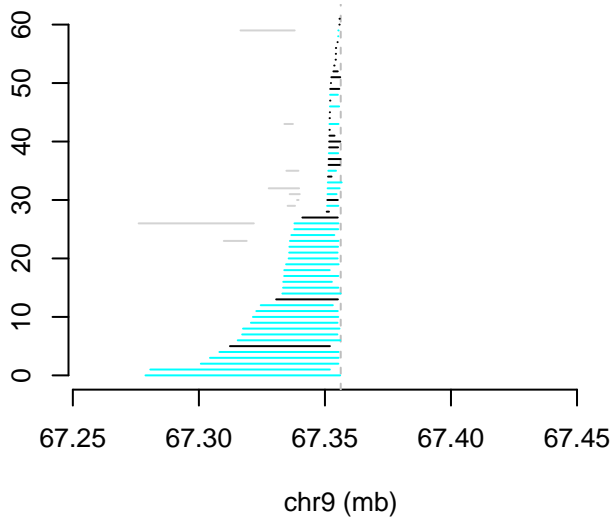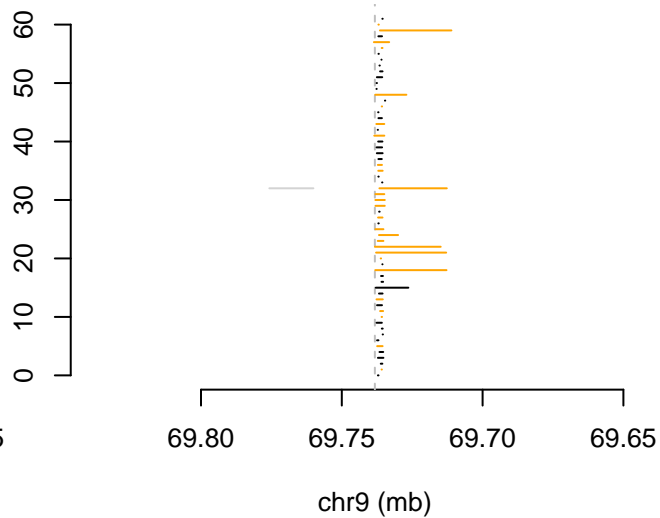

Copy number

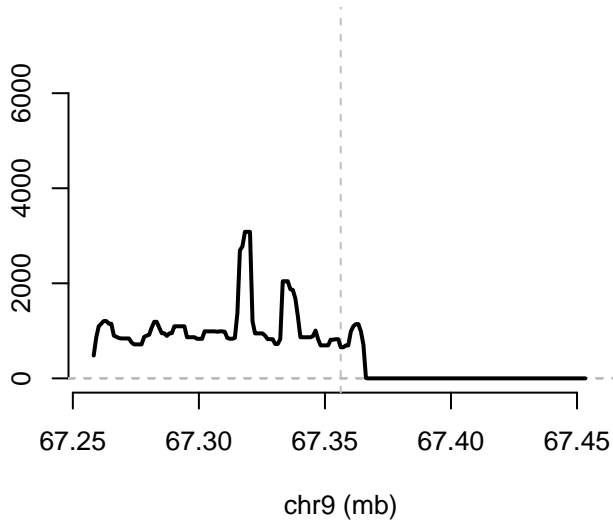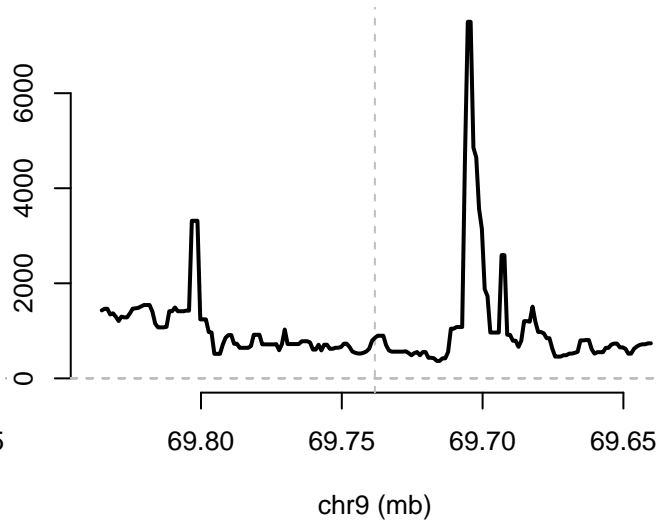

K562 chr9:69,738,257::chr9:67,356,271++

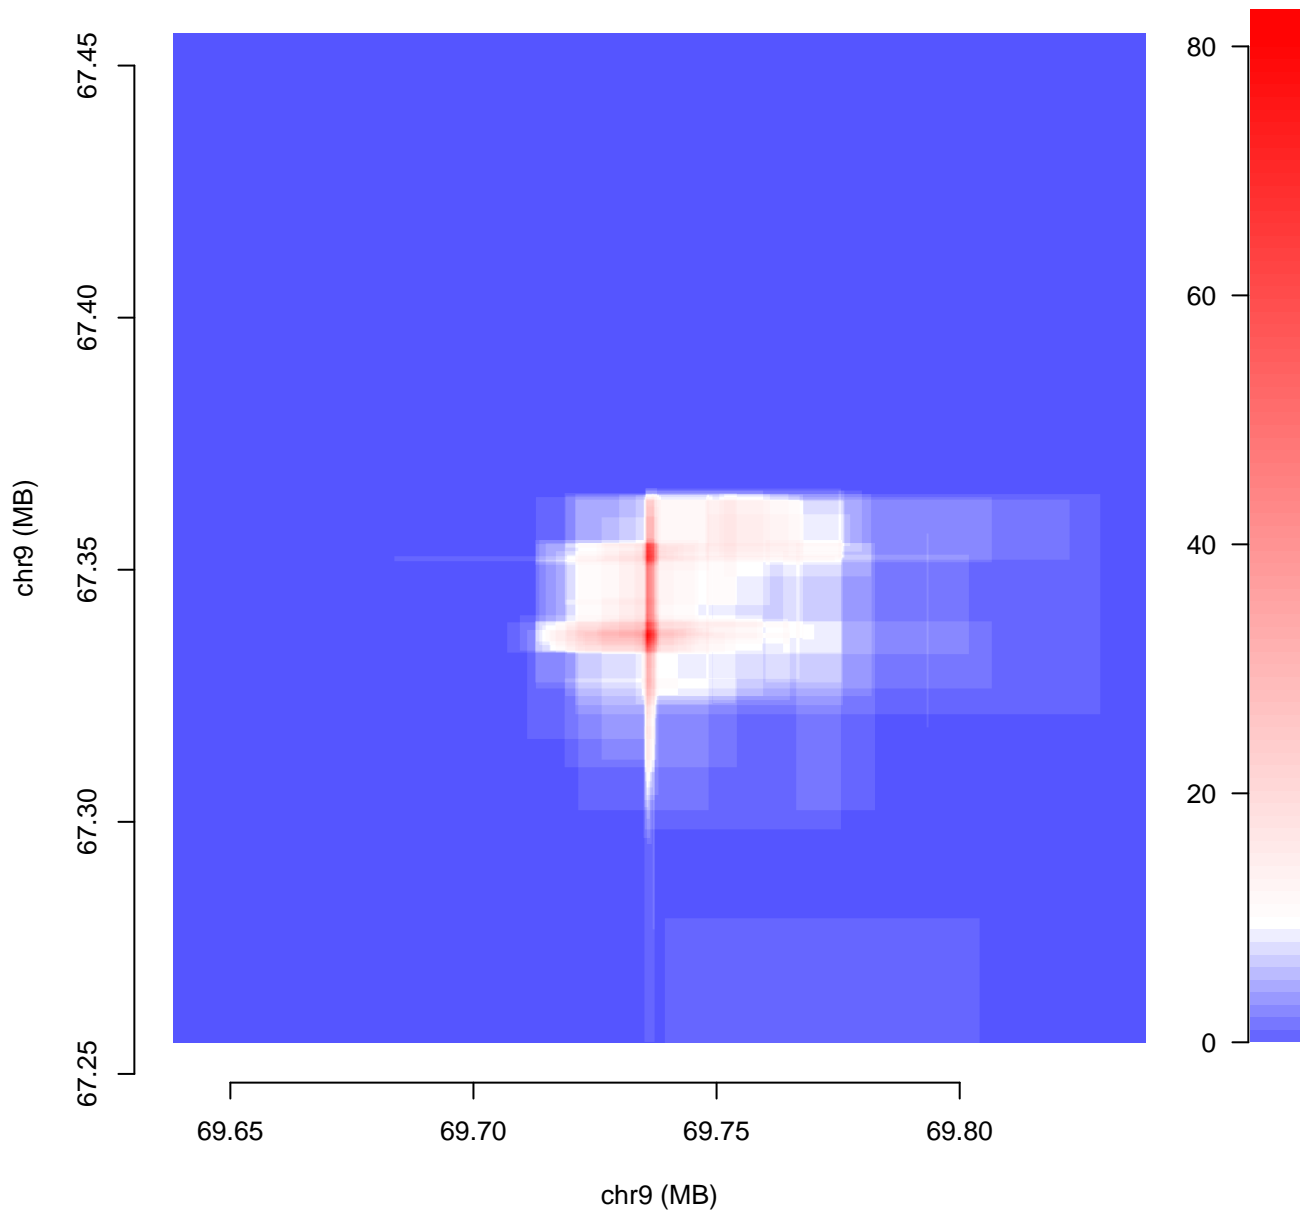

Supplement: Supplemental_Data.zip [file event_502.pdf › event_502.pdf]

Barcode

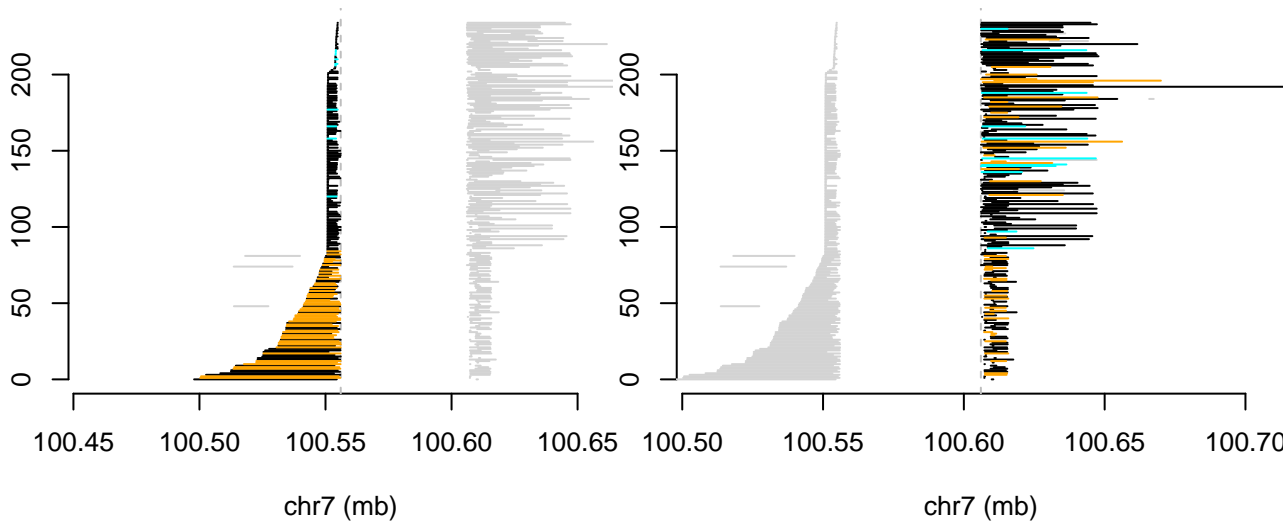

Copy number

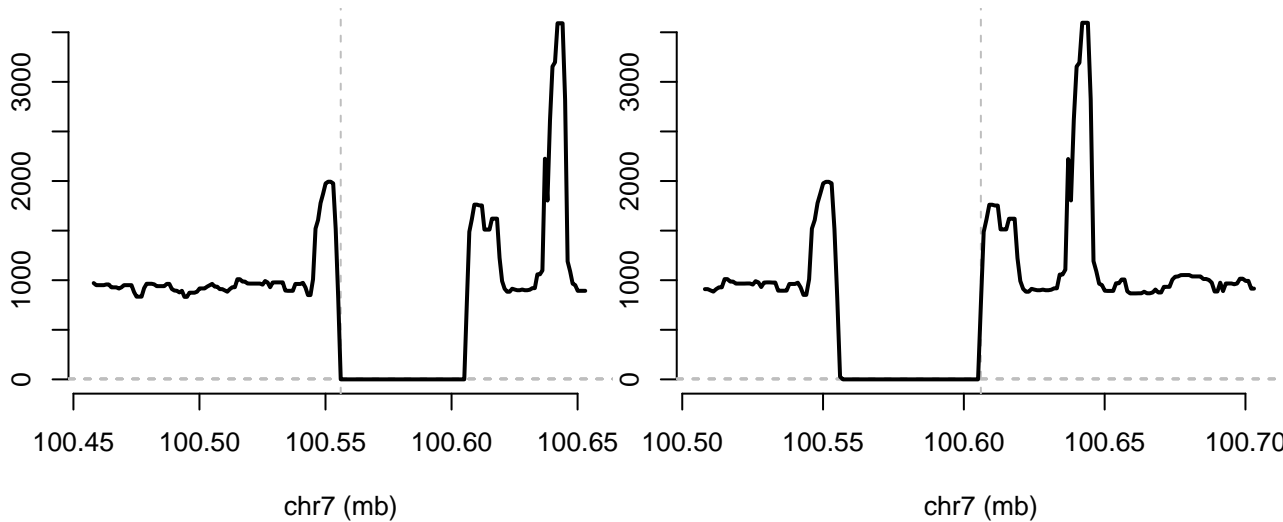

K562 chr7:100,556,043::chr7:100,606,042+-

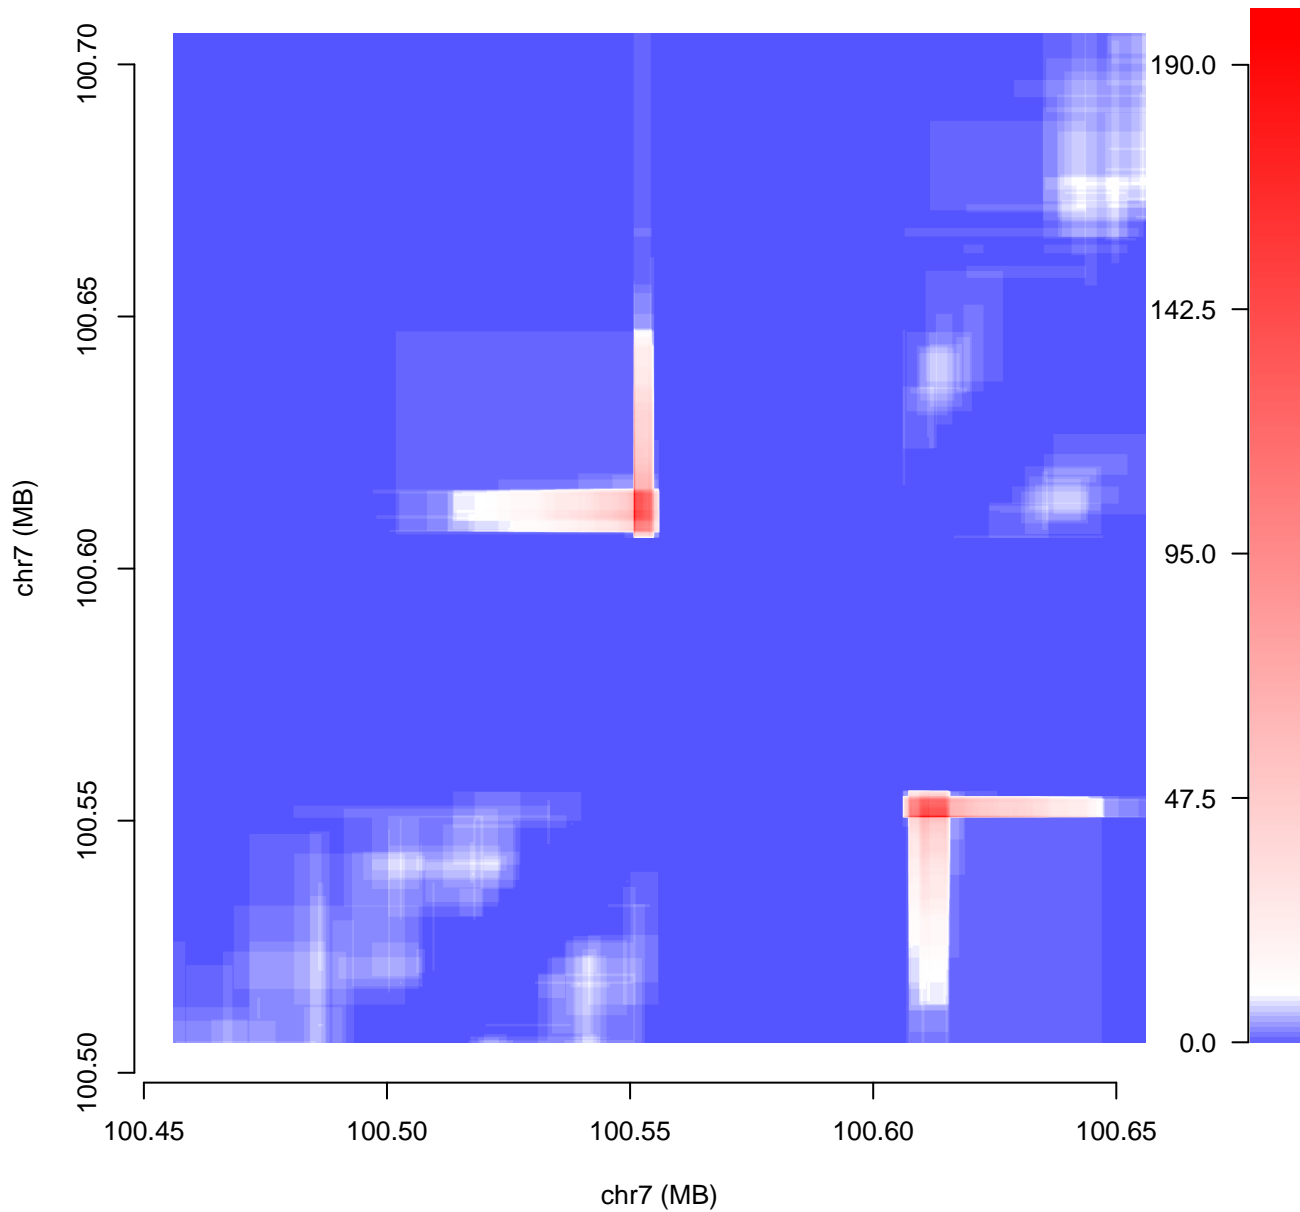

Supplement: Supplemental_Data.zip [file event_503.pdf › event_503.pdf]

Barcode

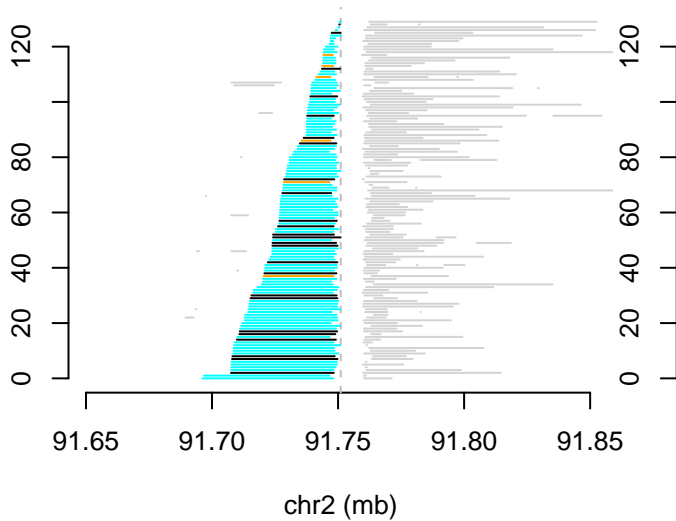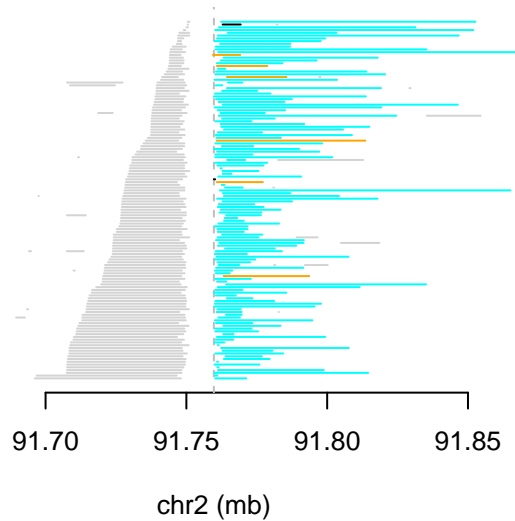

Copy number

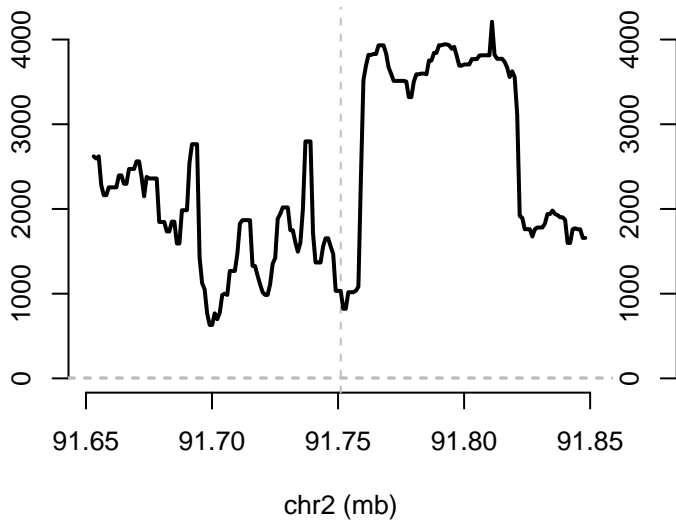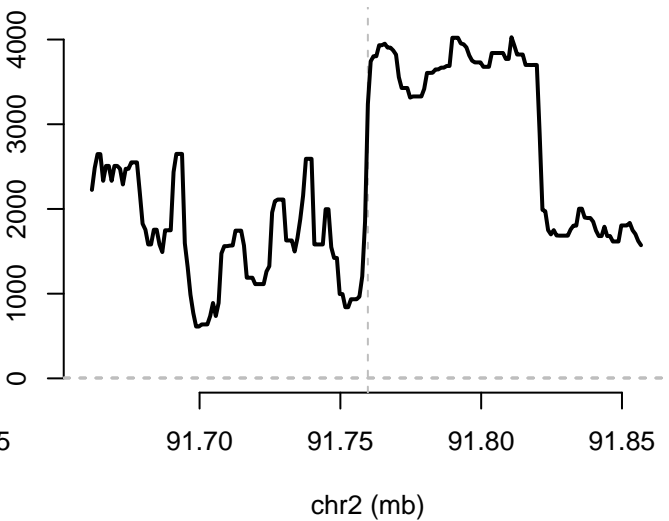

K562 chr2:91,751,062::chr2:91,759,766+-

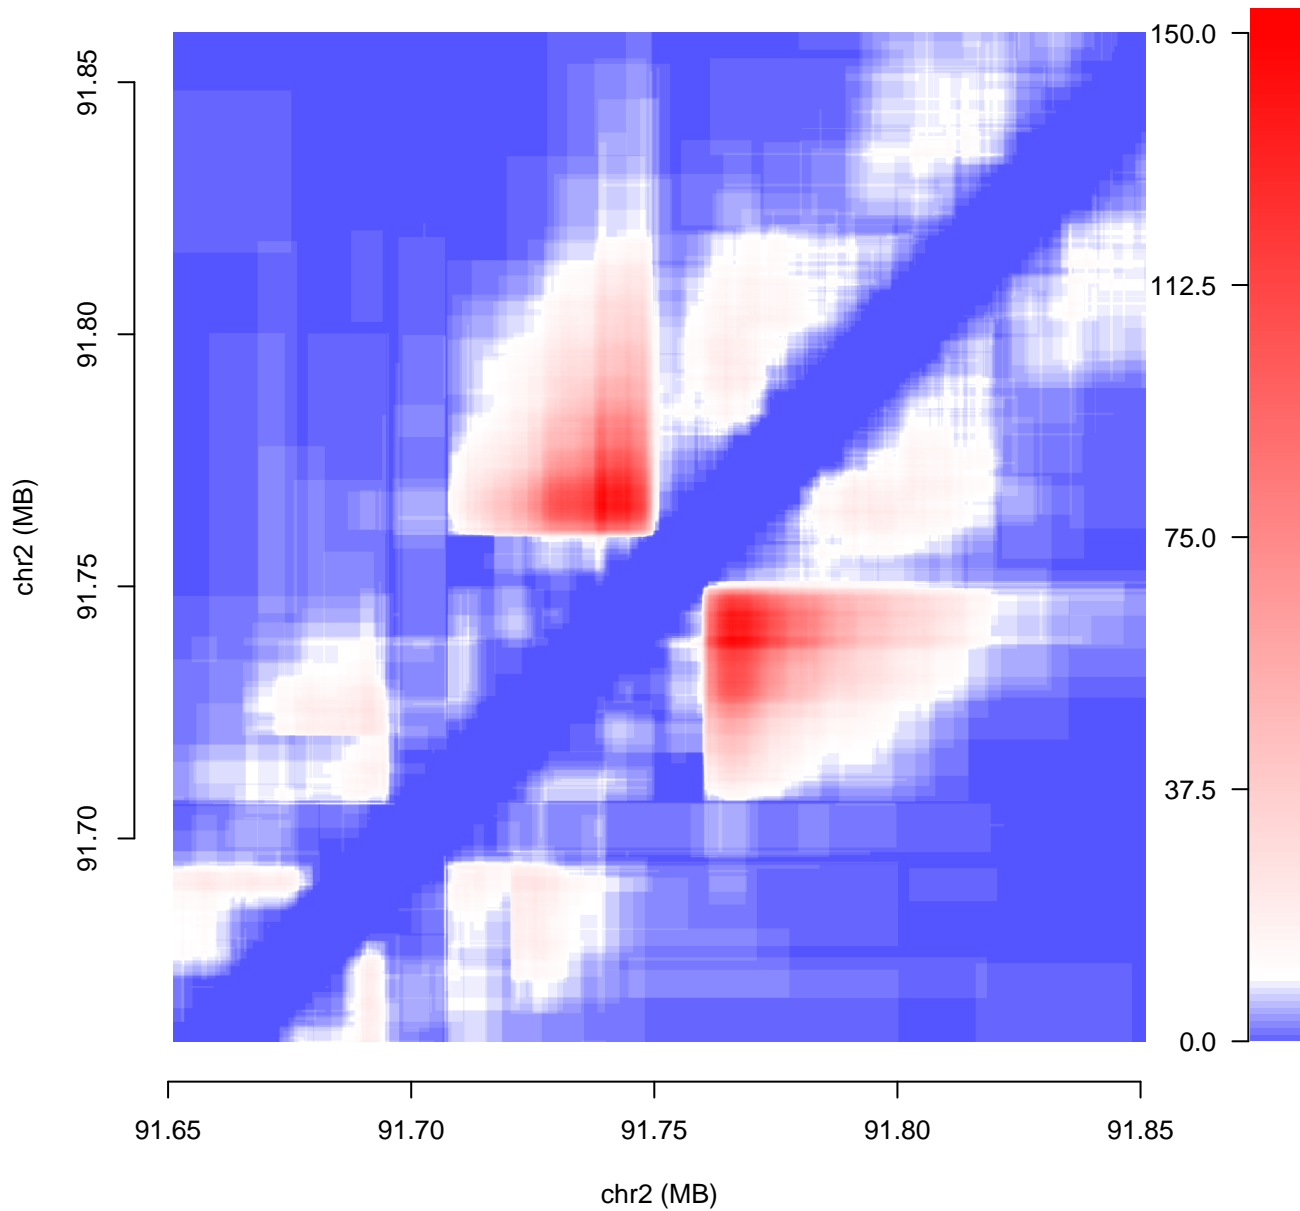

Supplement: Supplemental_Data.zip [file event_504.pdf › event_504.pdf]

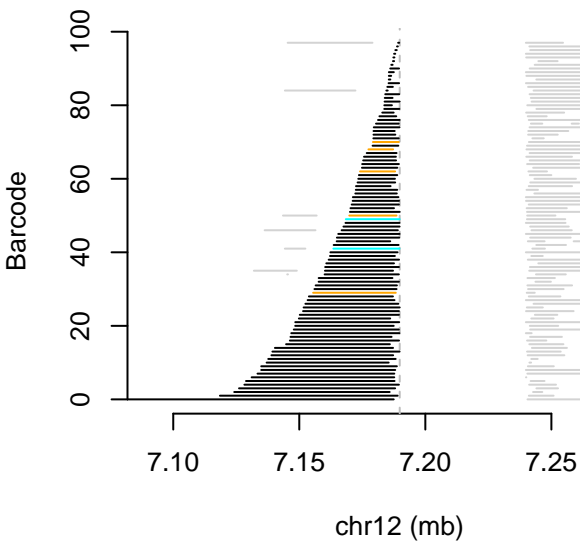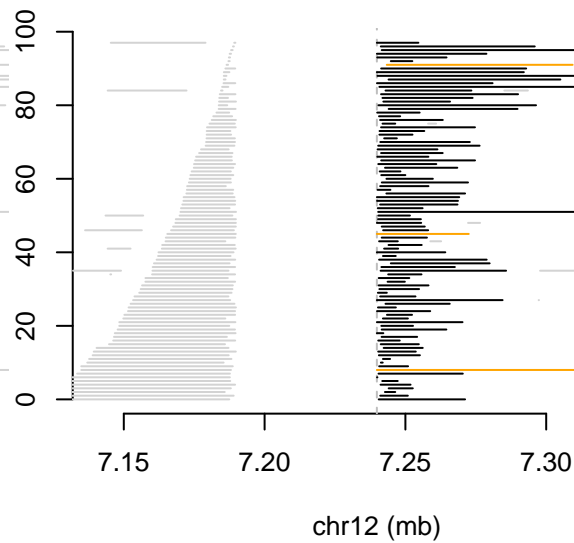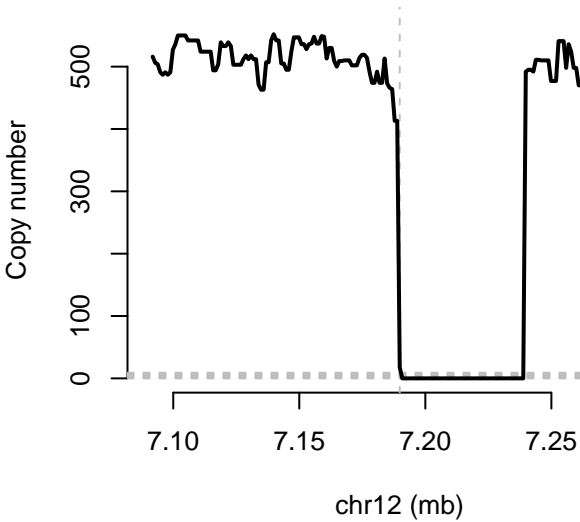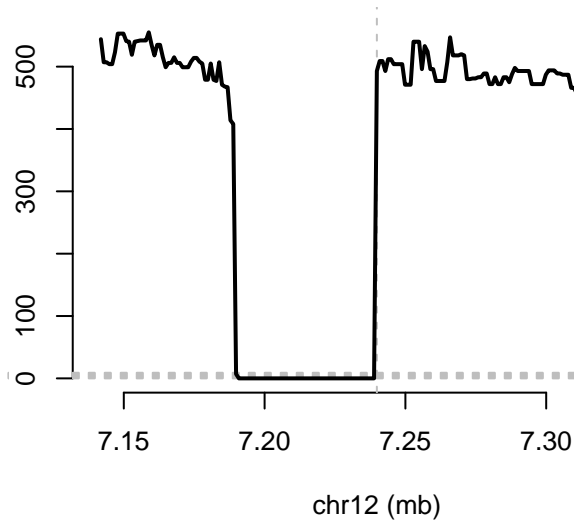

K562 chr12:7,239,874::chr12:7,189,849-+

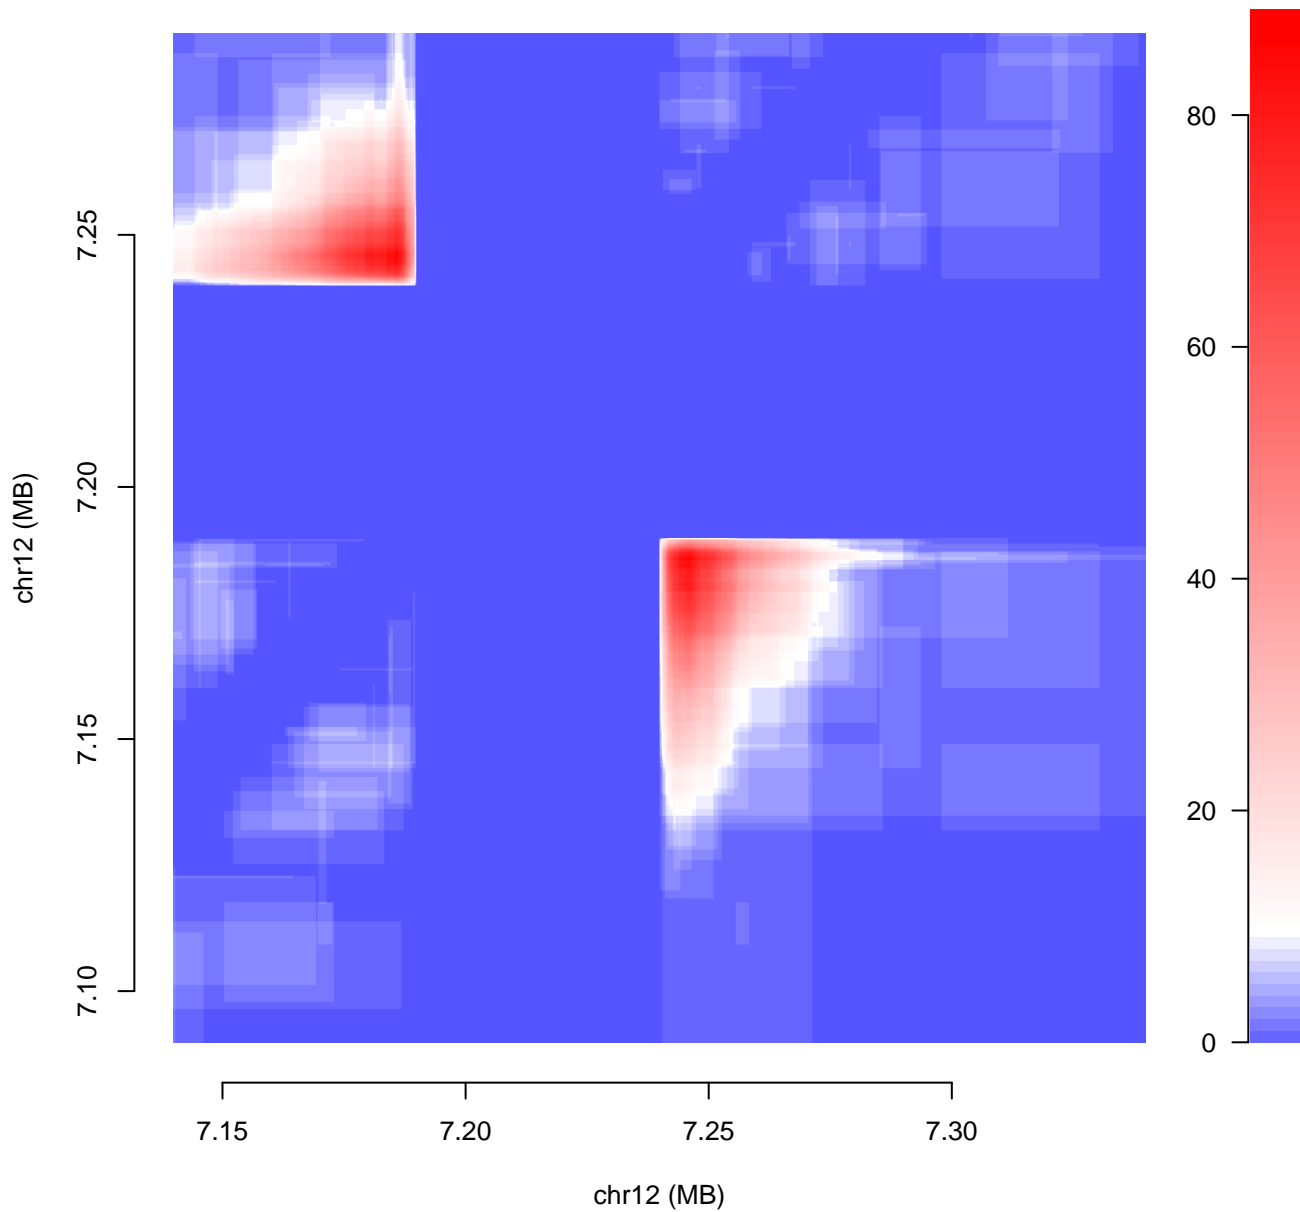

Supplement: Supplemental_Data.zip [file event_505.pdf › event_505.pdf]

Barcode

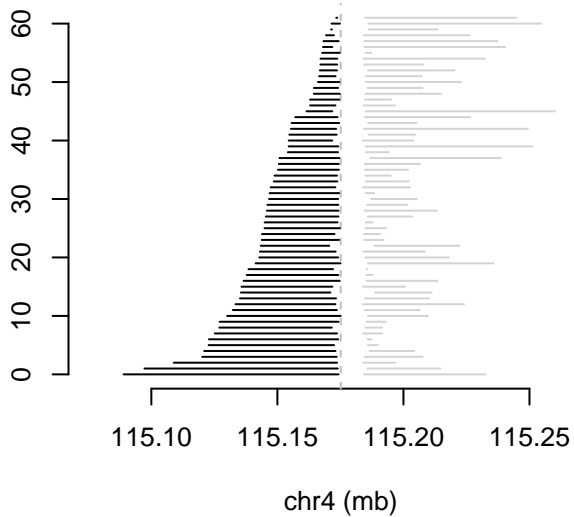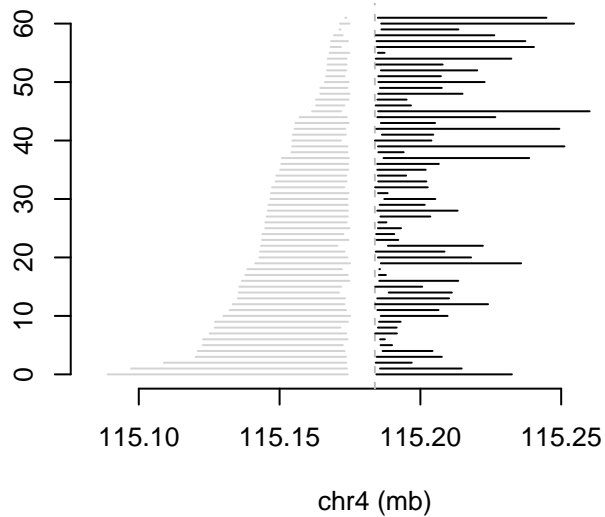

Copy number

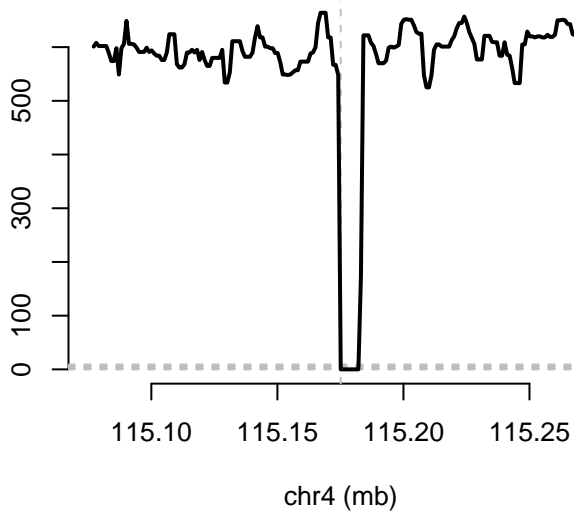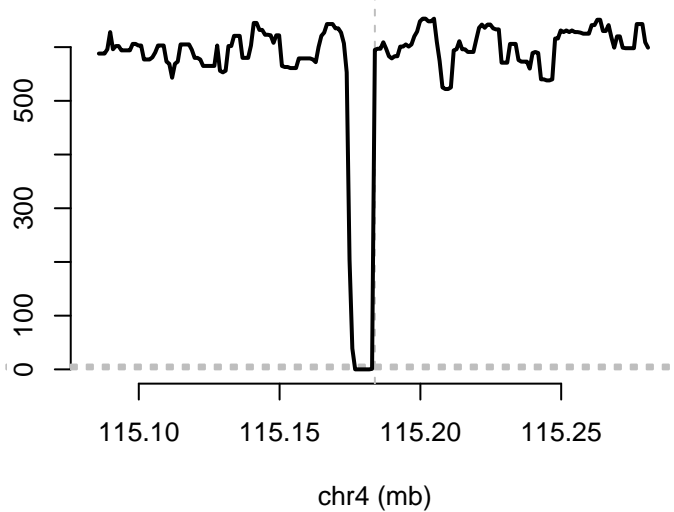

K562 chr4:115,175,128::chr4:115,183,834+-

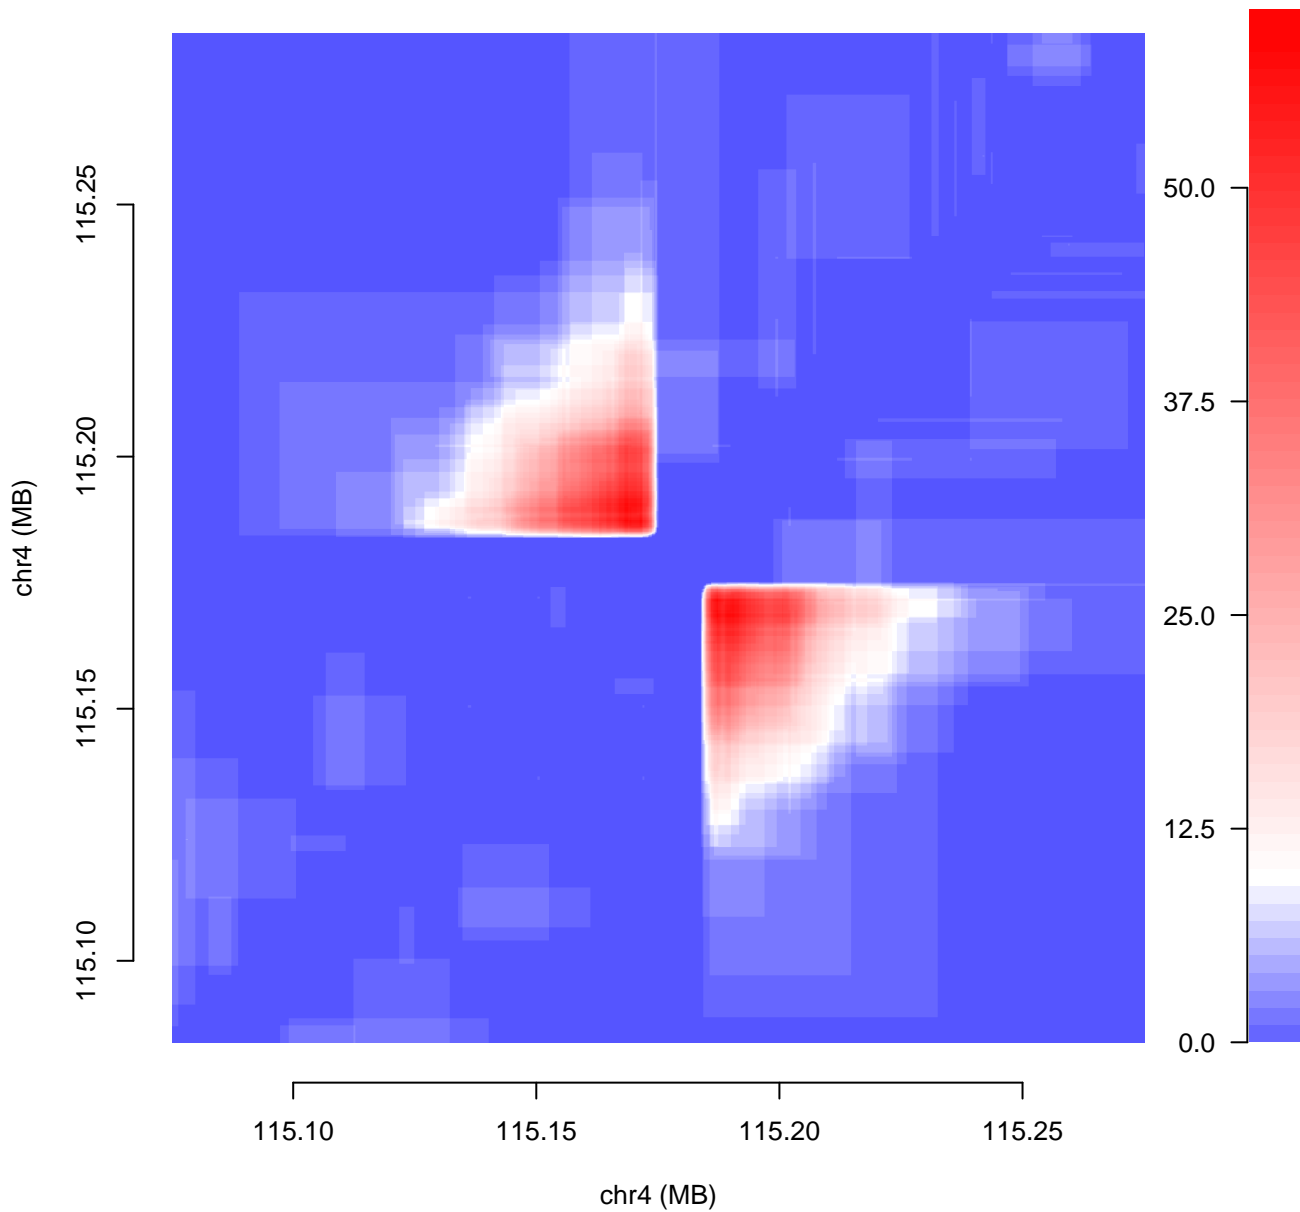

Supplement: Supplemental_Data.zip [file event_506.pdf › event_506.pdf]

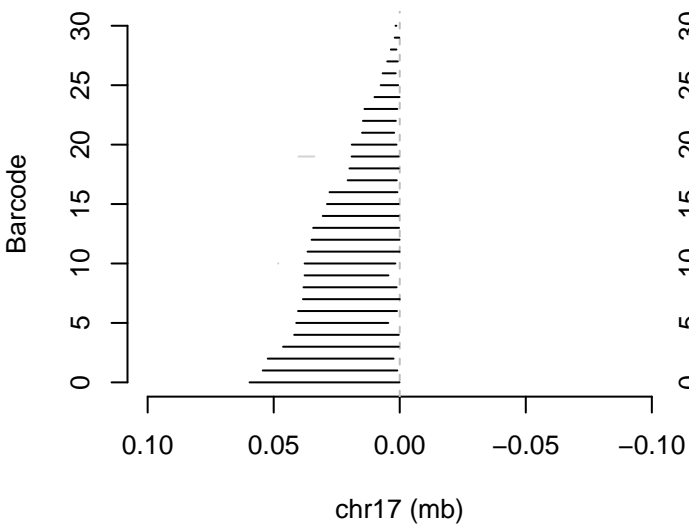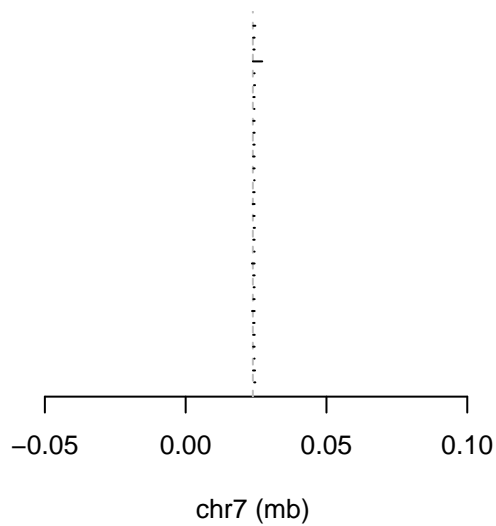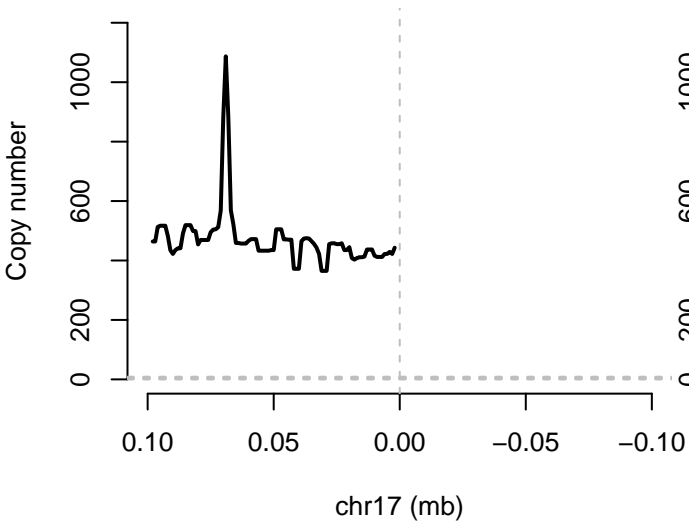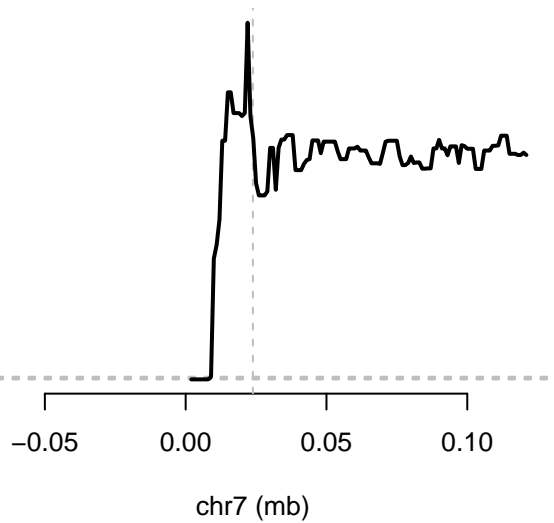

K562 chr7:23,861::chr17:1--

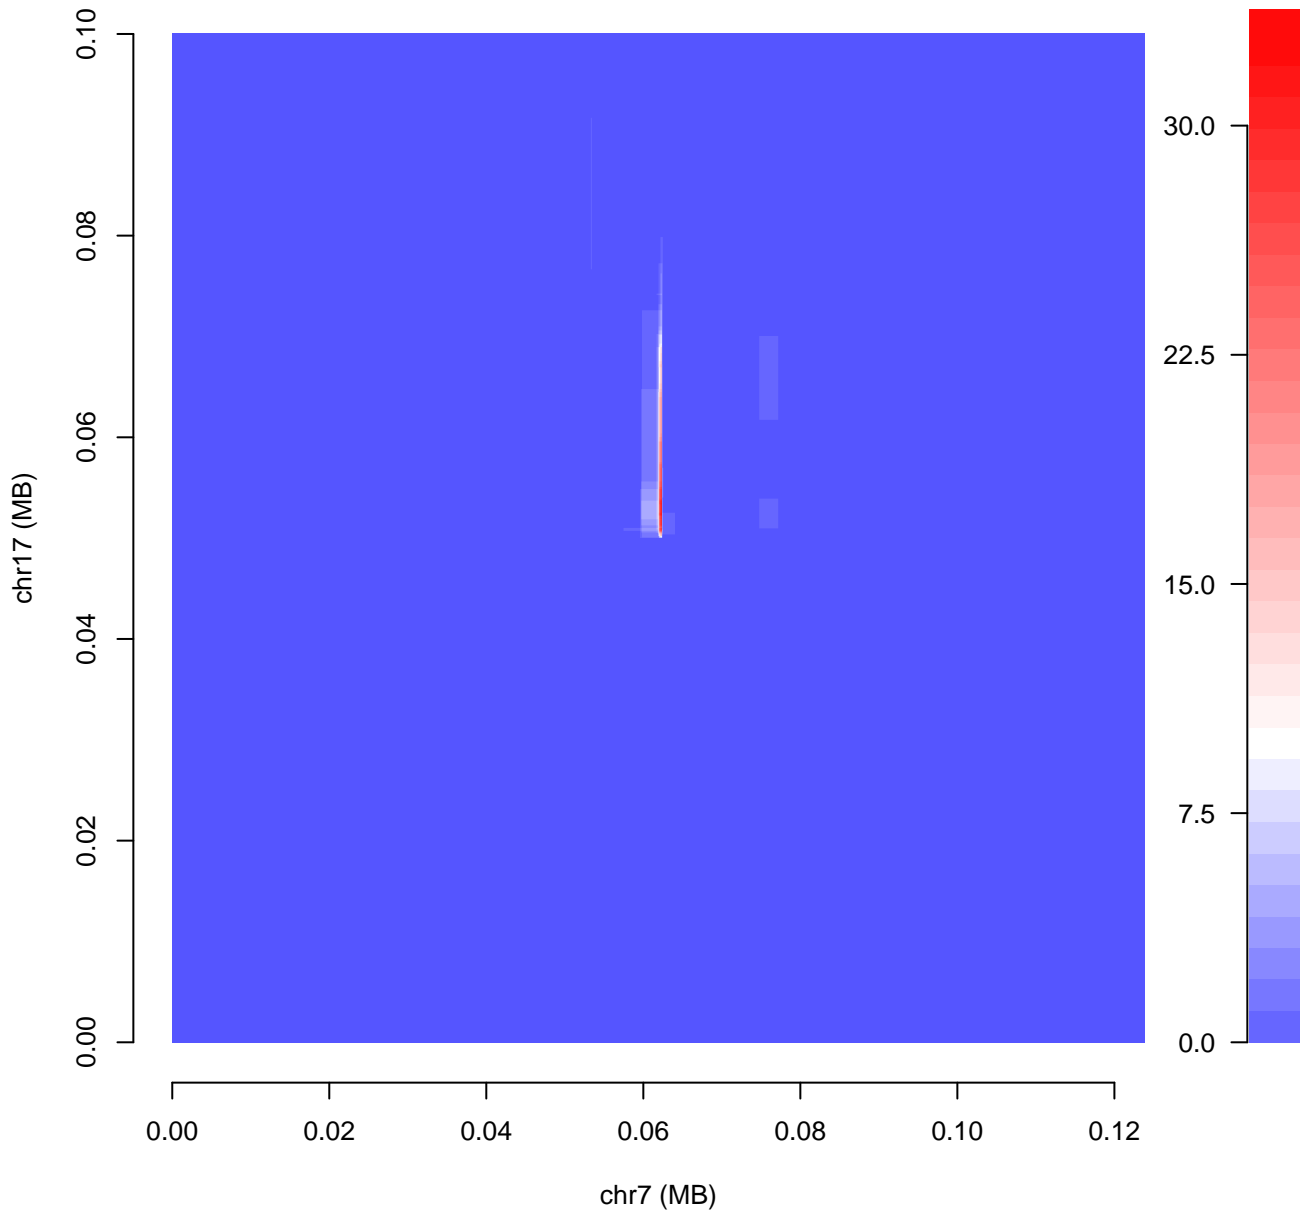

Supplement: Supplemental_Data.zip [file event_507.pdf › event_507.pdf]

Barcode

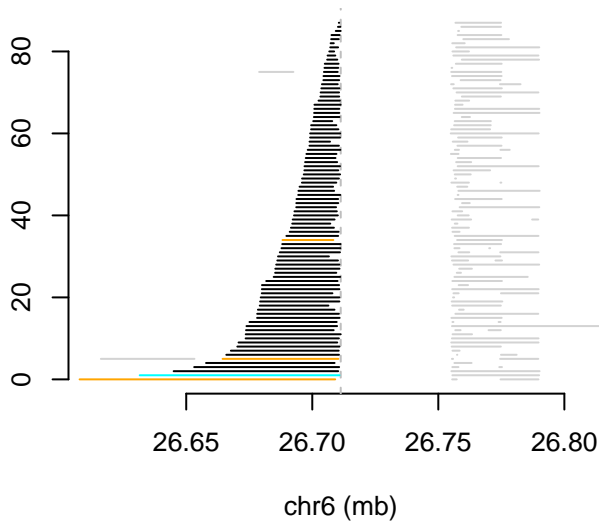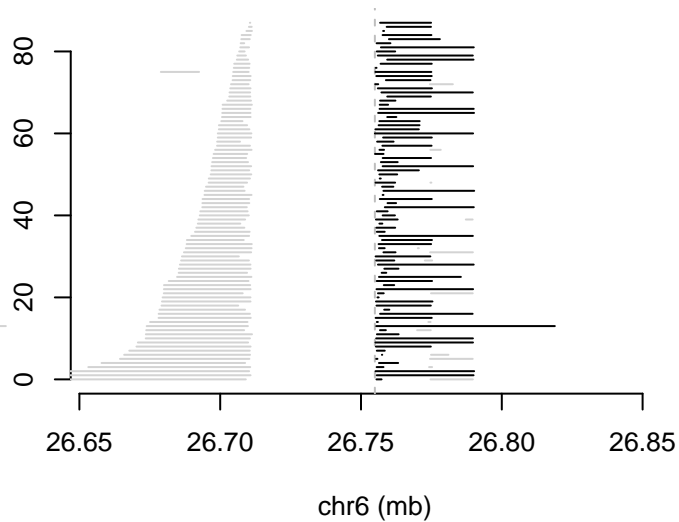

Copy number

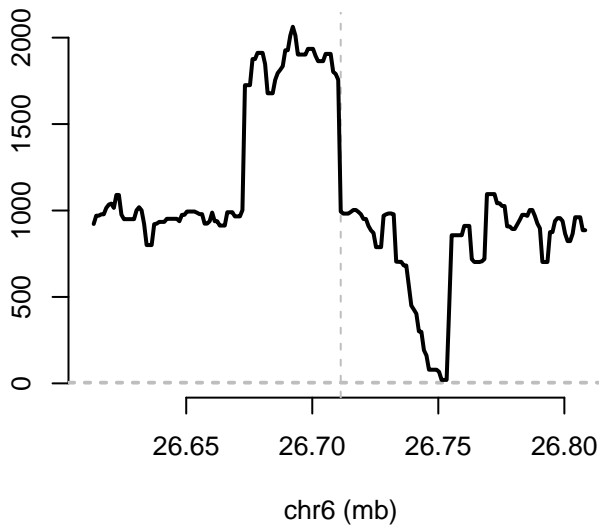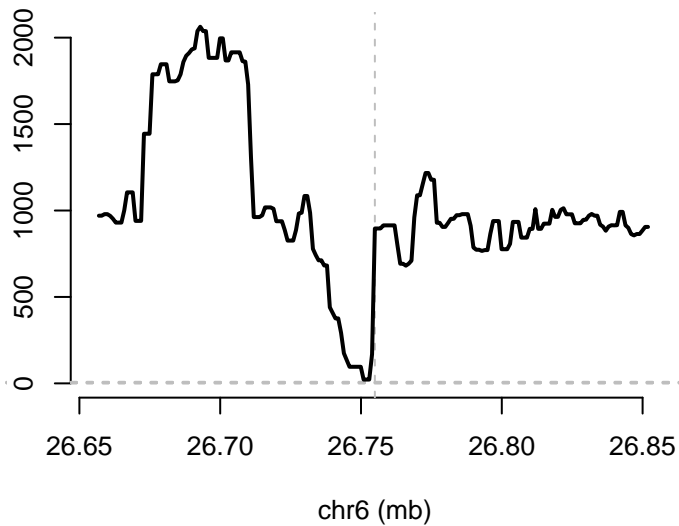

K562 chr6:26,711,295::chr6:26,754,927+-

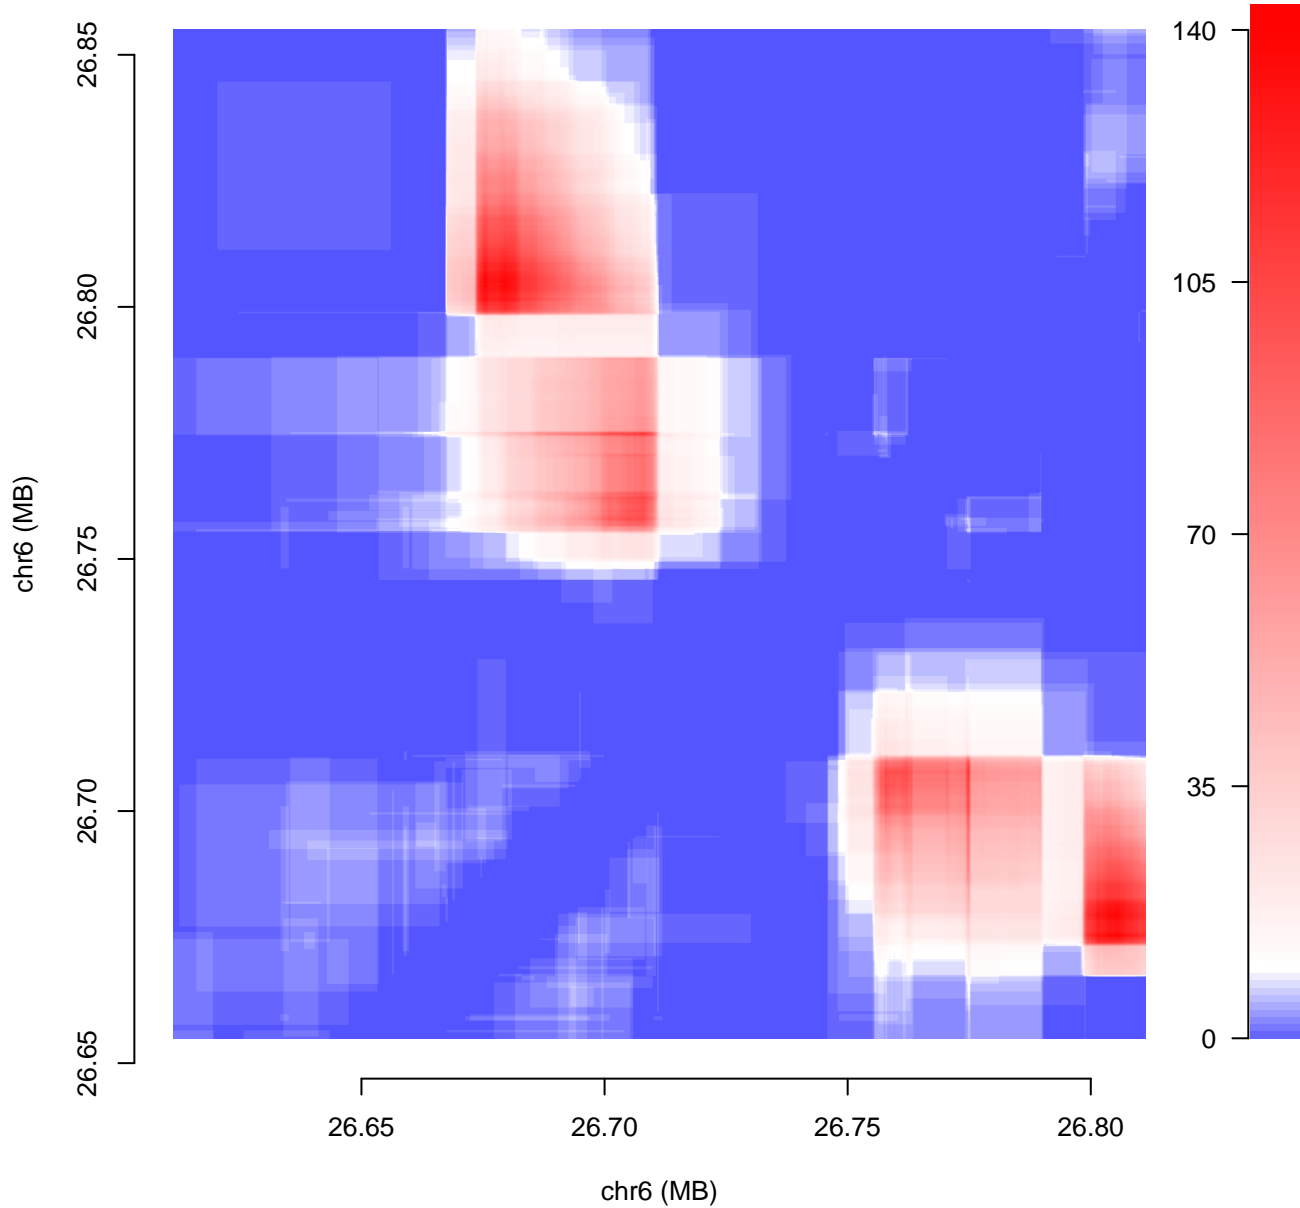

Supplement: Supplemental_Data.zip [file event_508.pdf › event_508.pdf]

Barcode

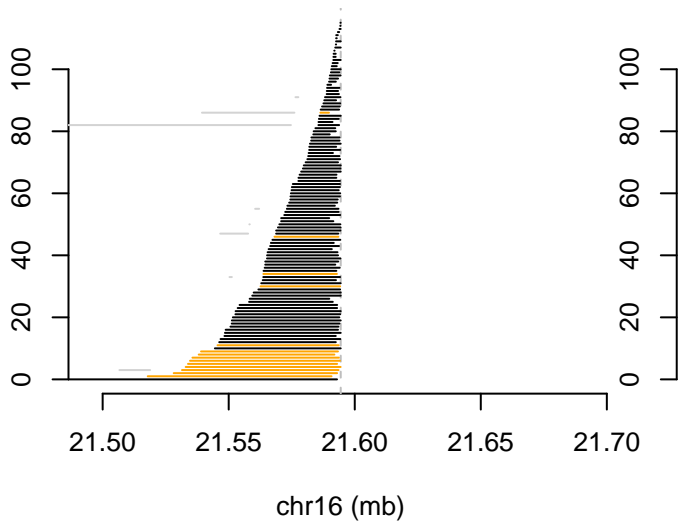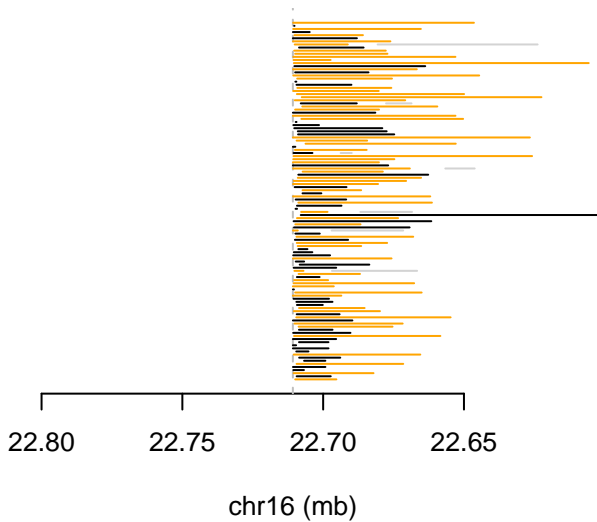

Copy number

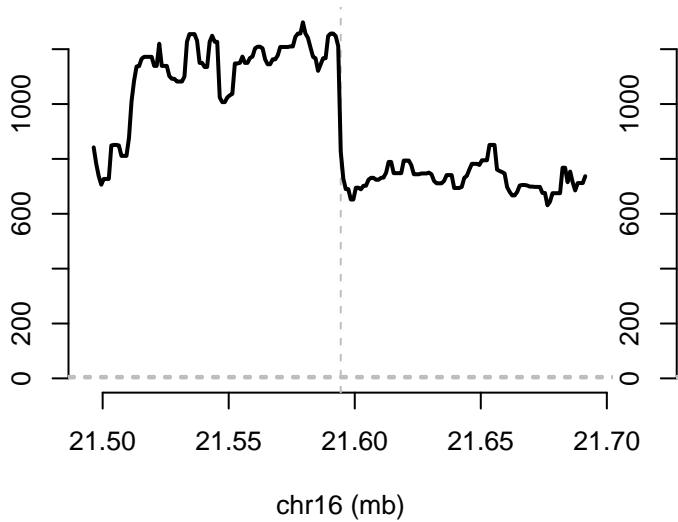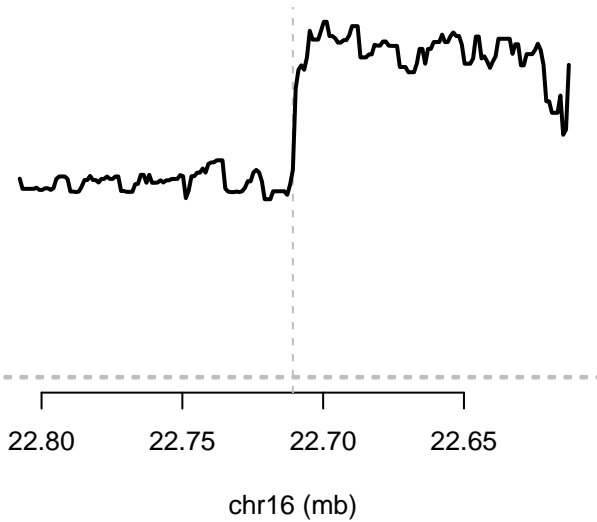

K562 chr16:21,594,442::chr16:22,710,751++

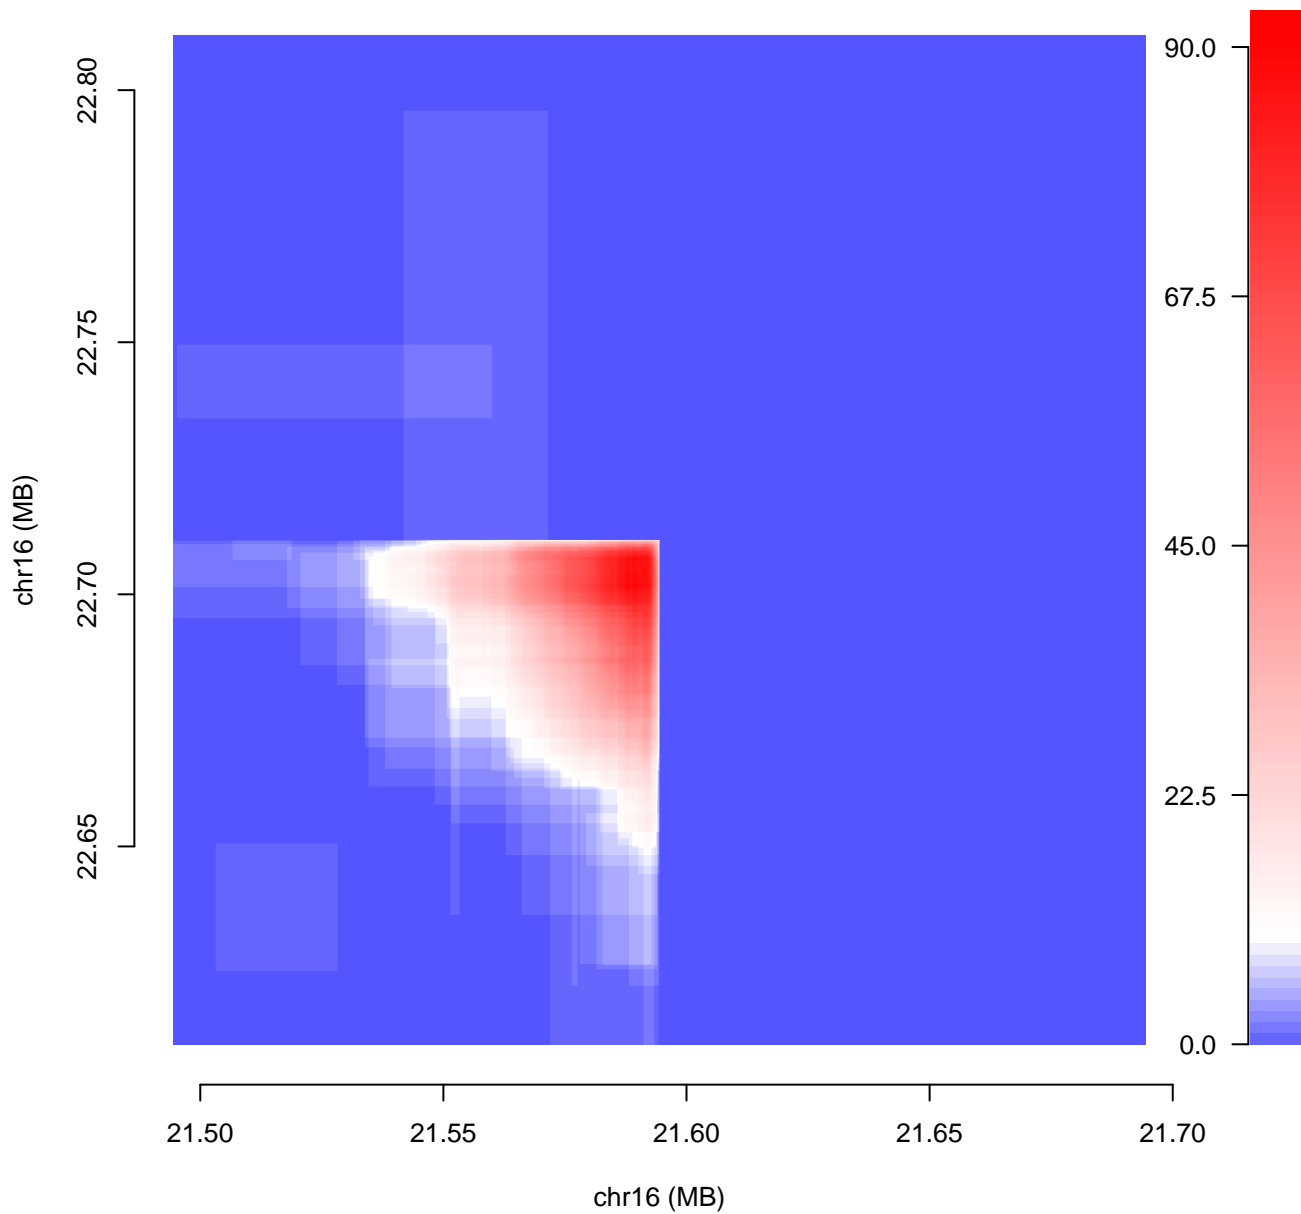

Supplement: Supplemental_Data.zip [file event_509.pdf › event_509.pdf]

Barcode

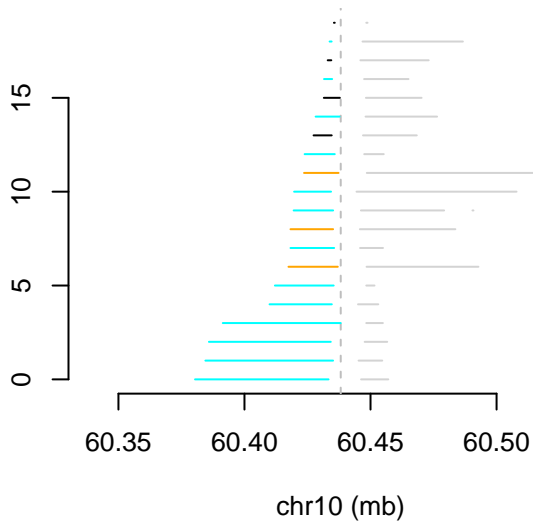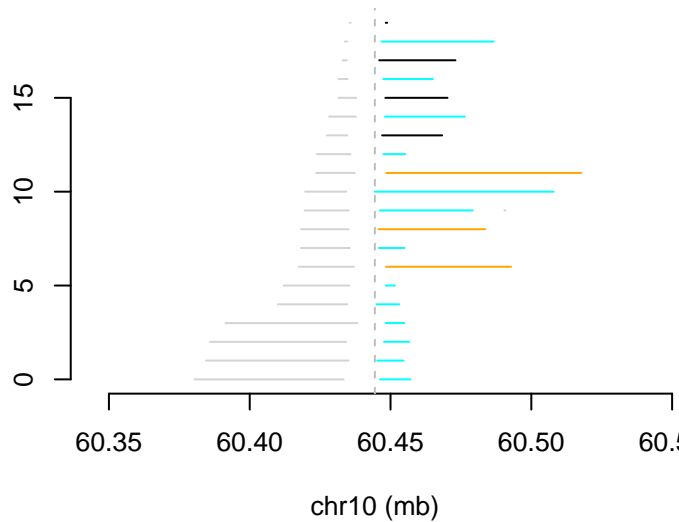

Copy number

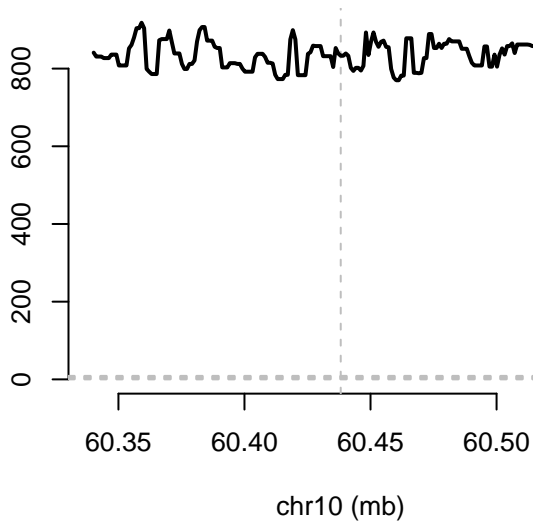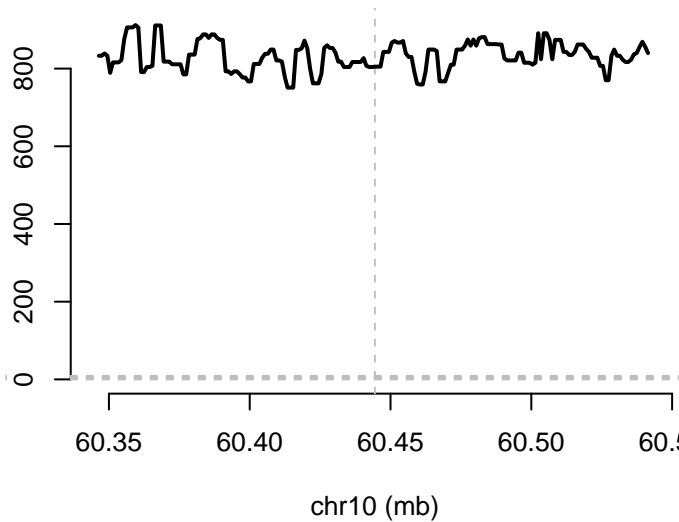

K562 chr10:60,444,445::chr10:60,438,187-+

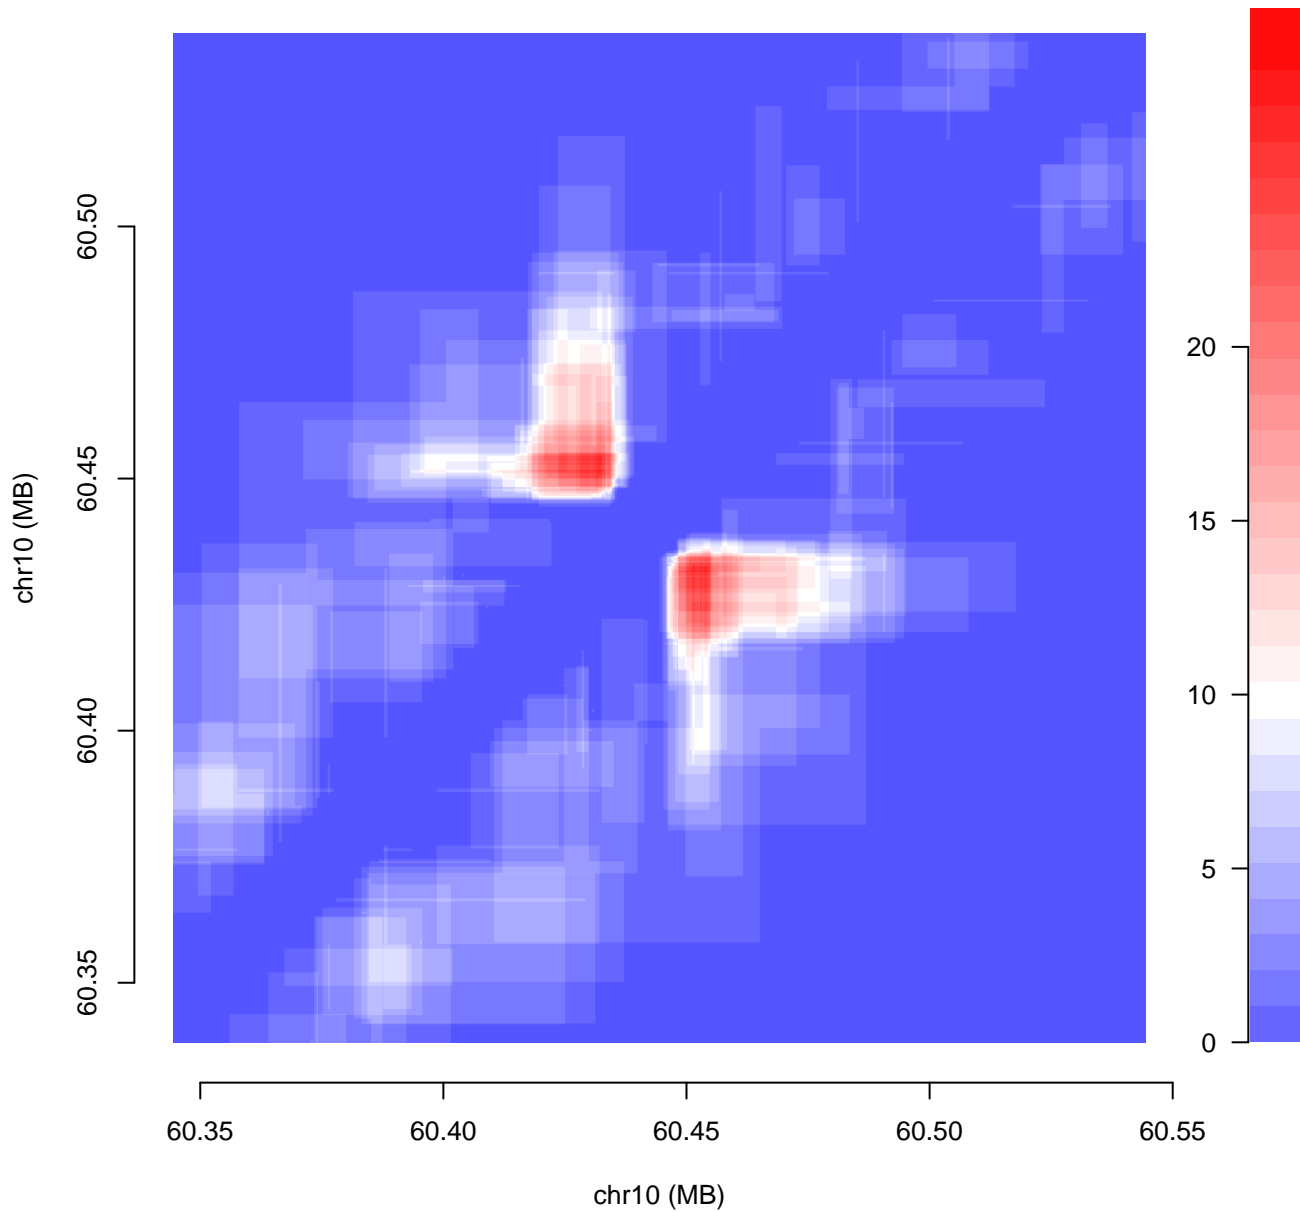

Supplement: Supplemental_Data.zip [file event_51.pdf › event_51.pdf]

Barcode

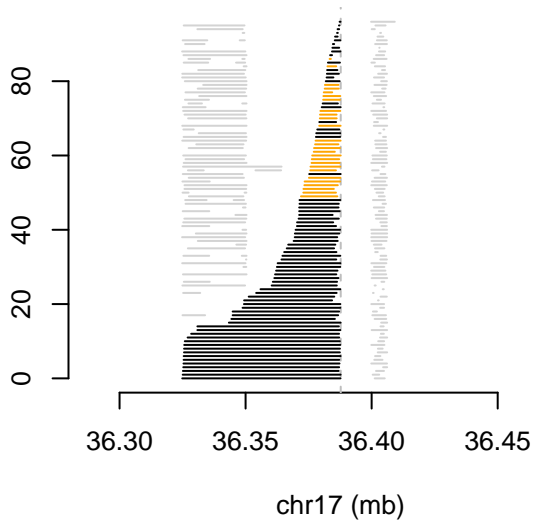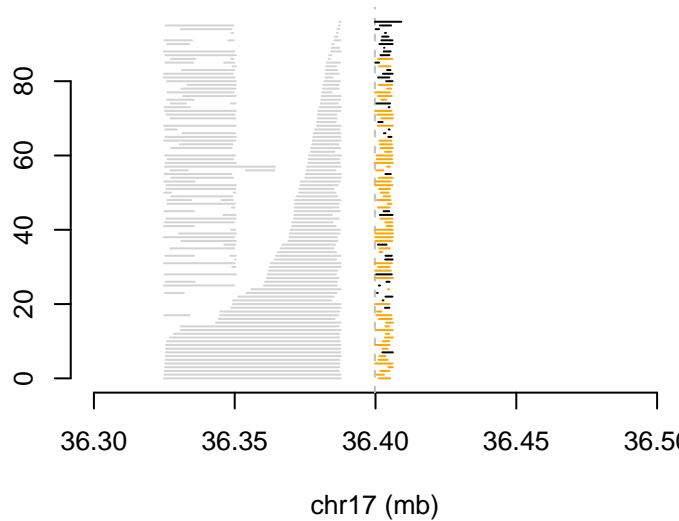

Copy number

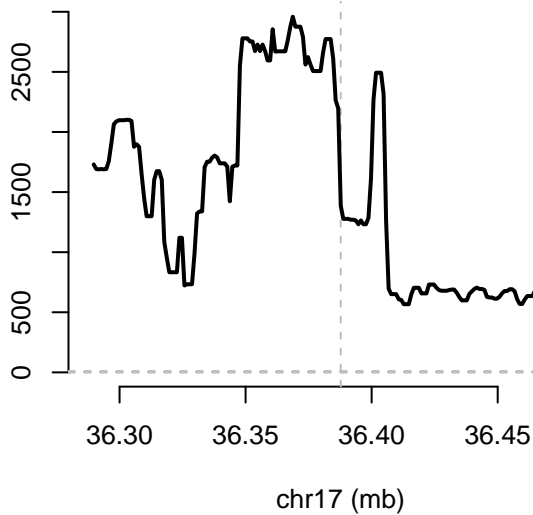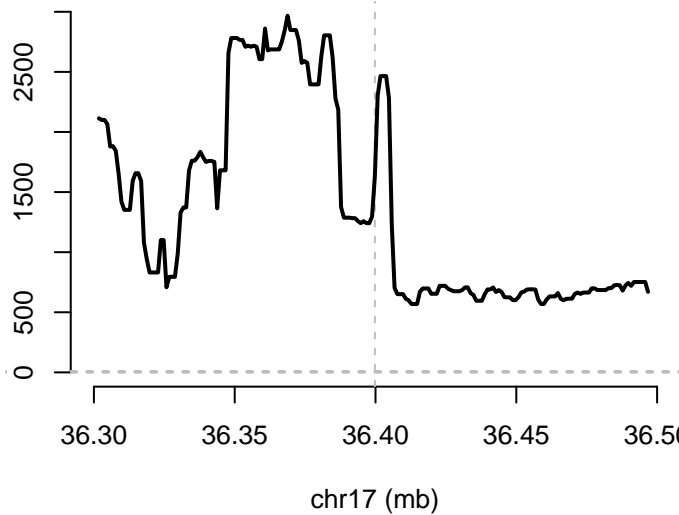

K562 chr17:36,387,743::chr17:36,399,773+-

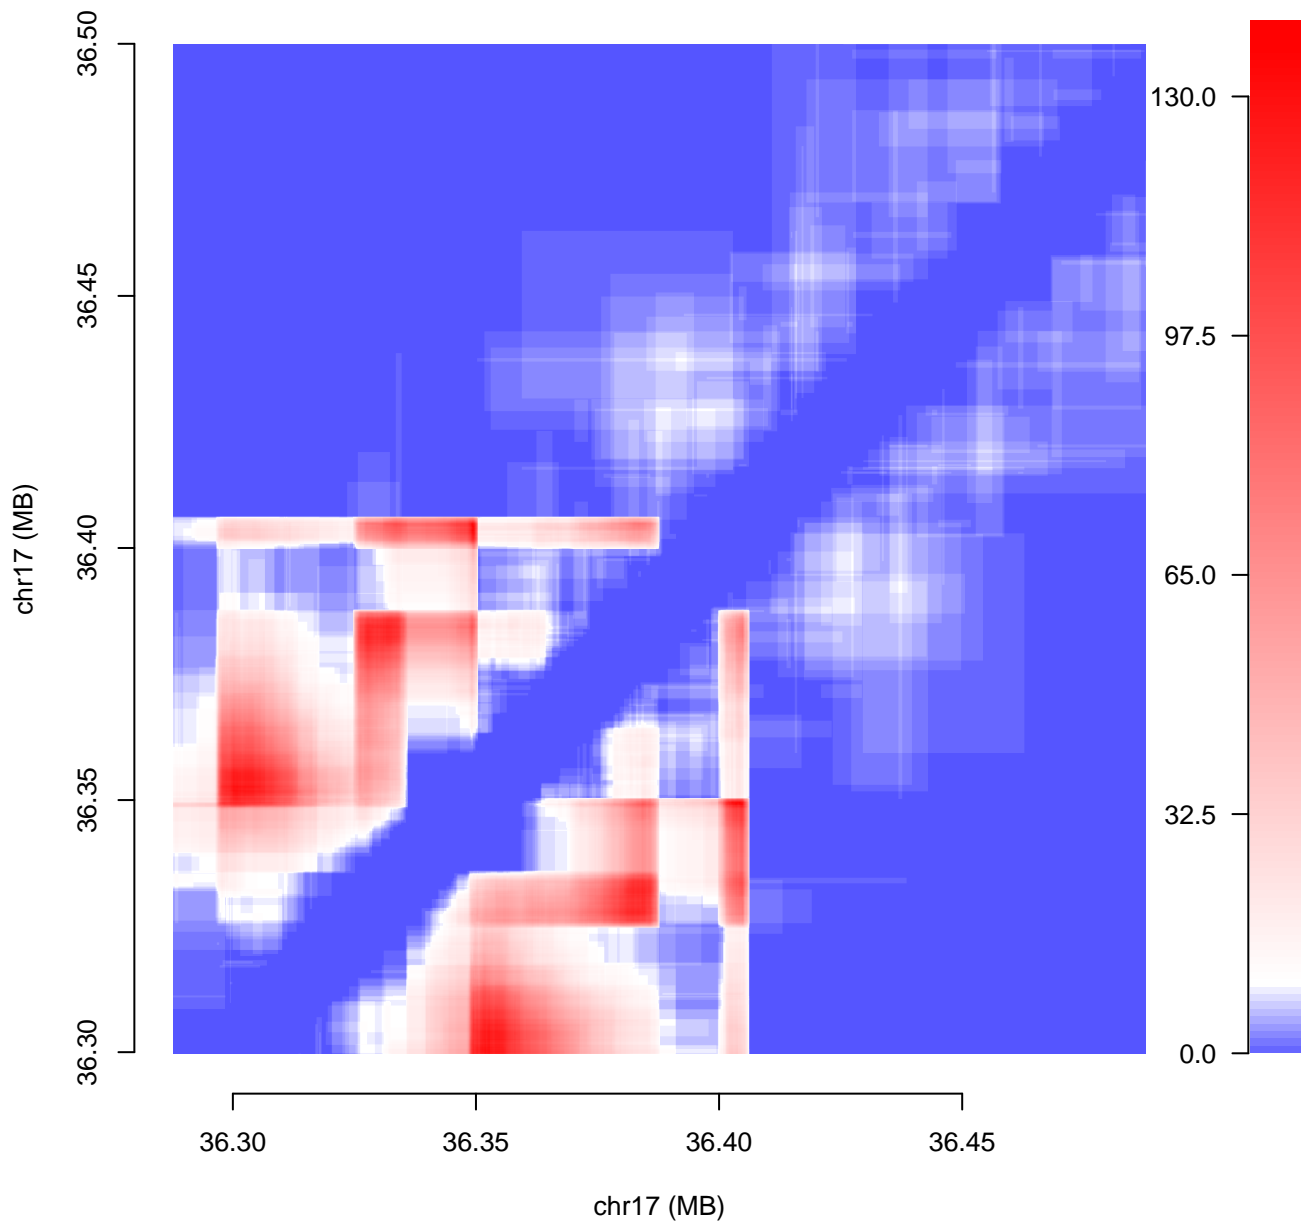

Supplement: Supplemental_Data.zip [file event_510.pdf › event_510.pdf]

Barcode

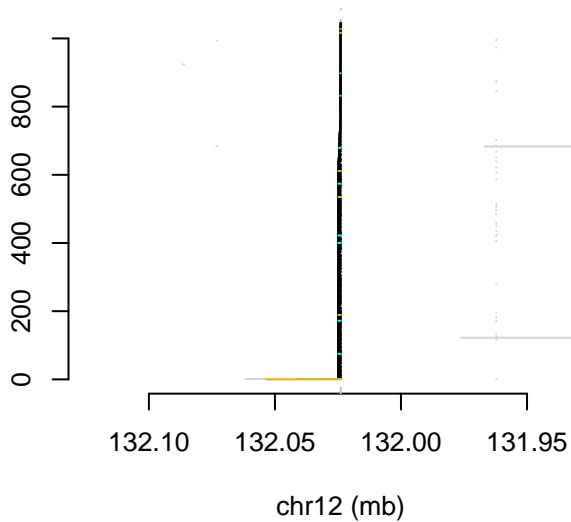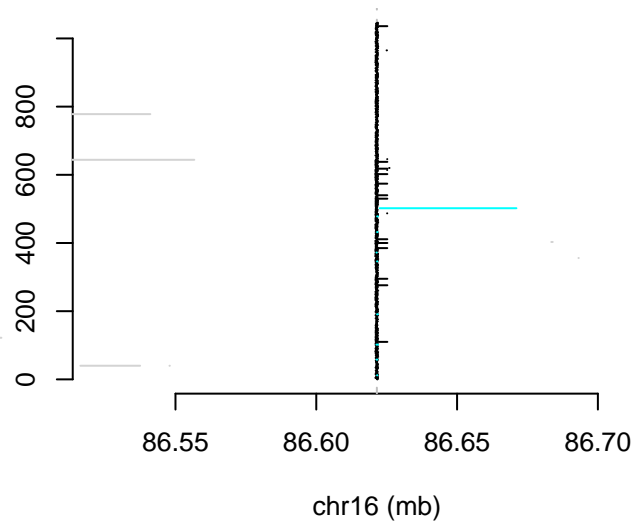

Copy number

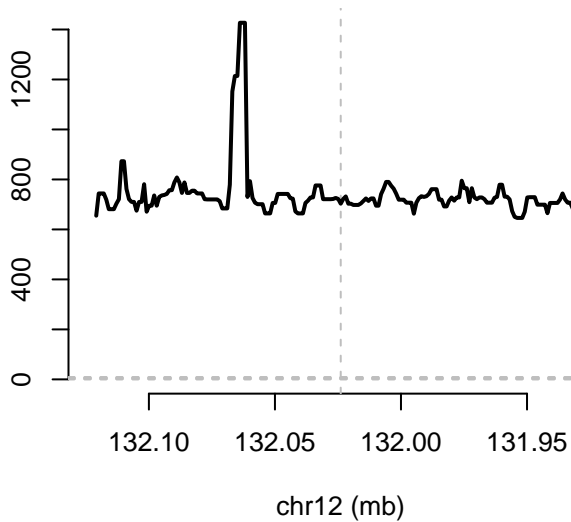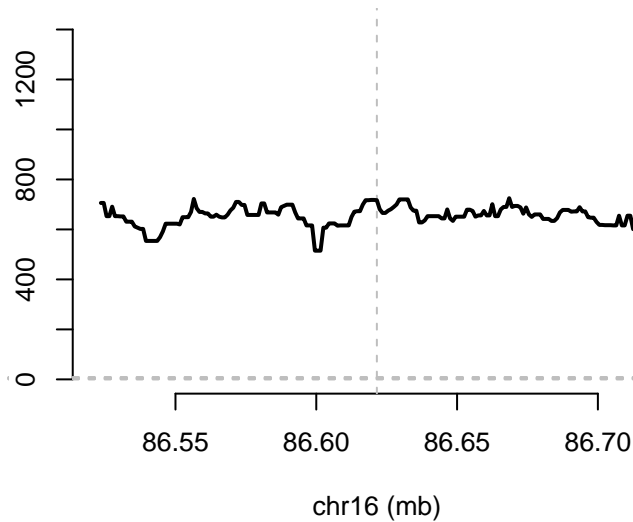

K562 chr16:86,621,514::chr12:132,023,895--

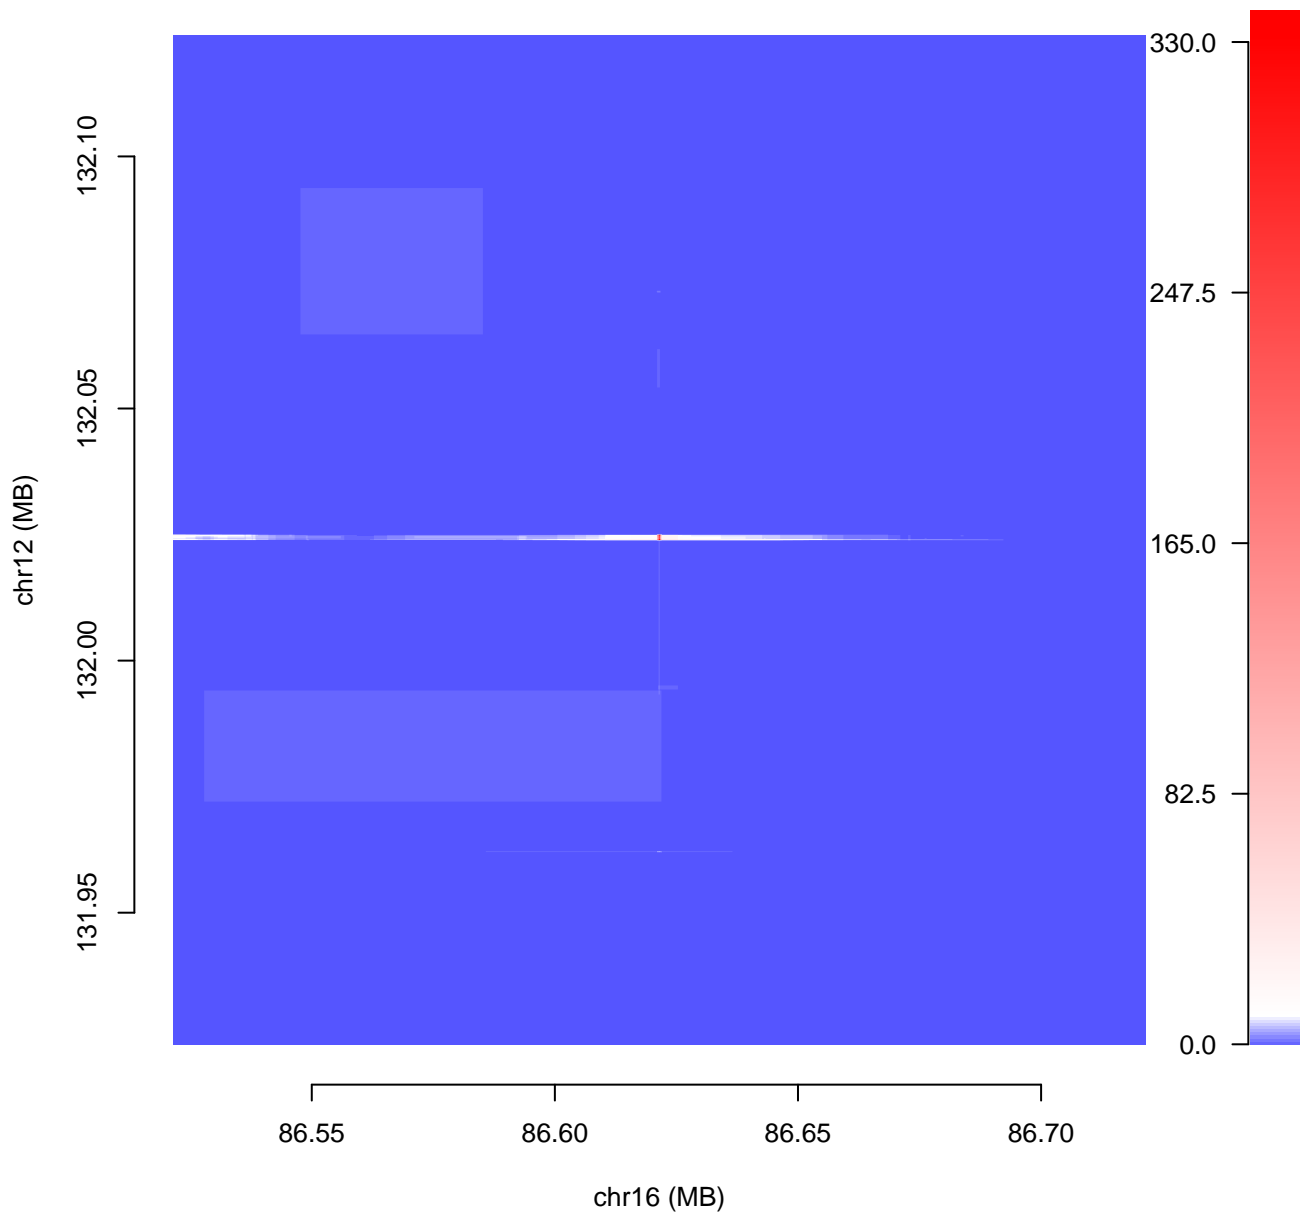

Supplement: Supplemental_Data.zip [file event_511.pdf › event_511.pdf]

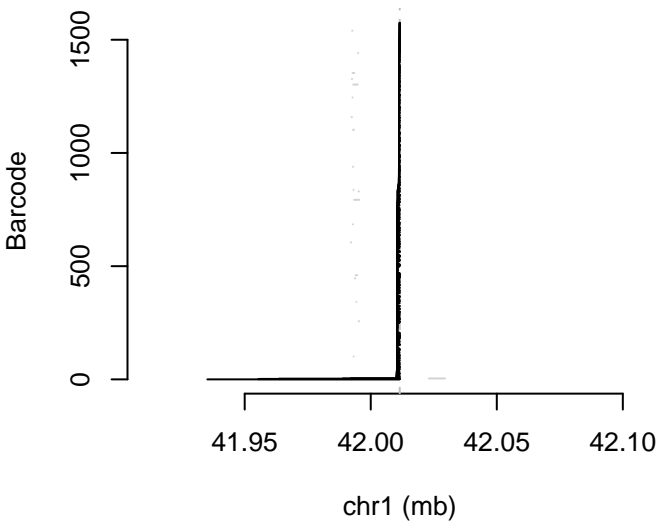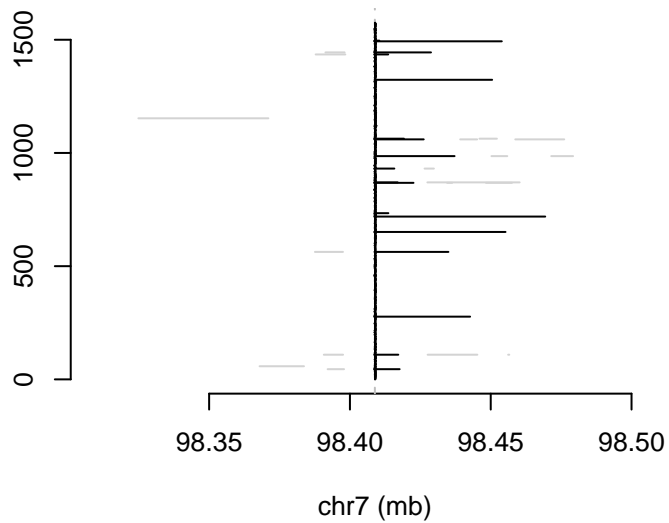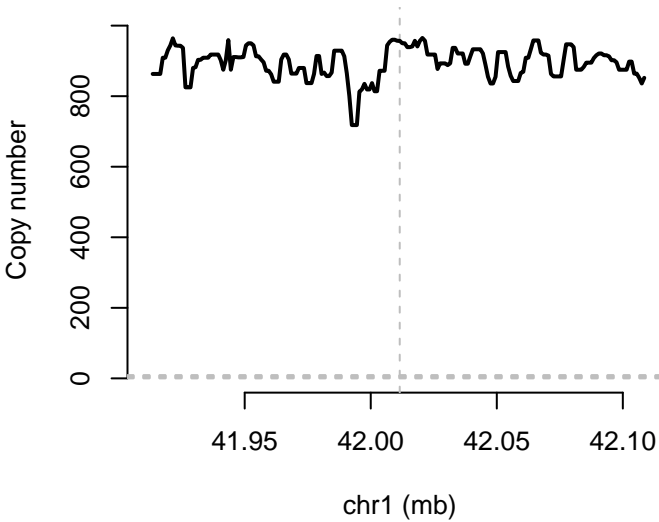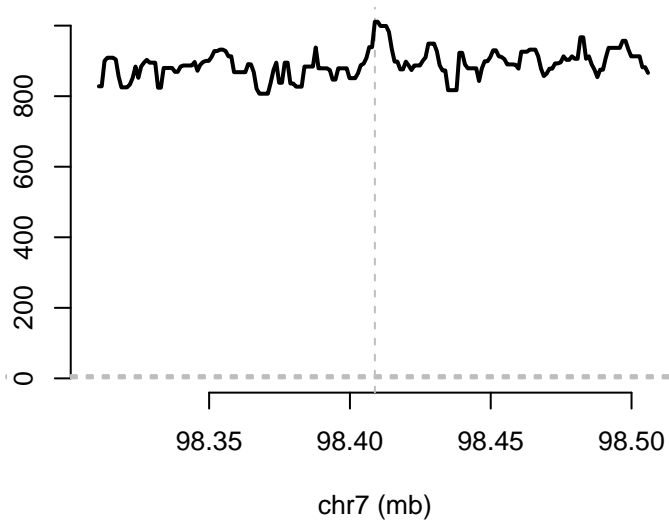

K562 chr1:42,011,503::chr7:98,408,856+-

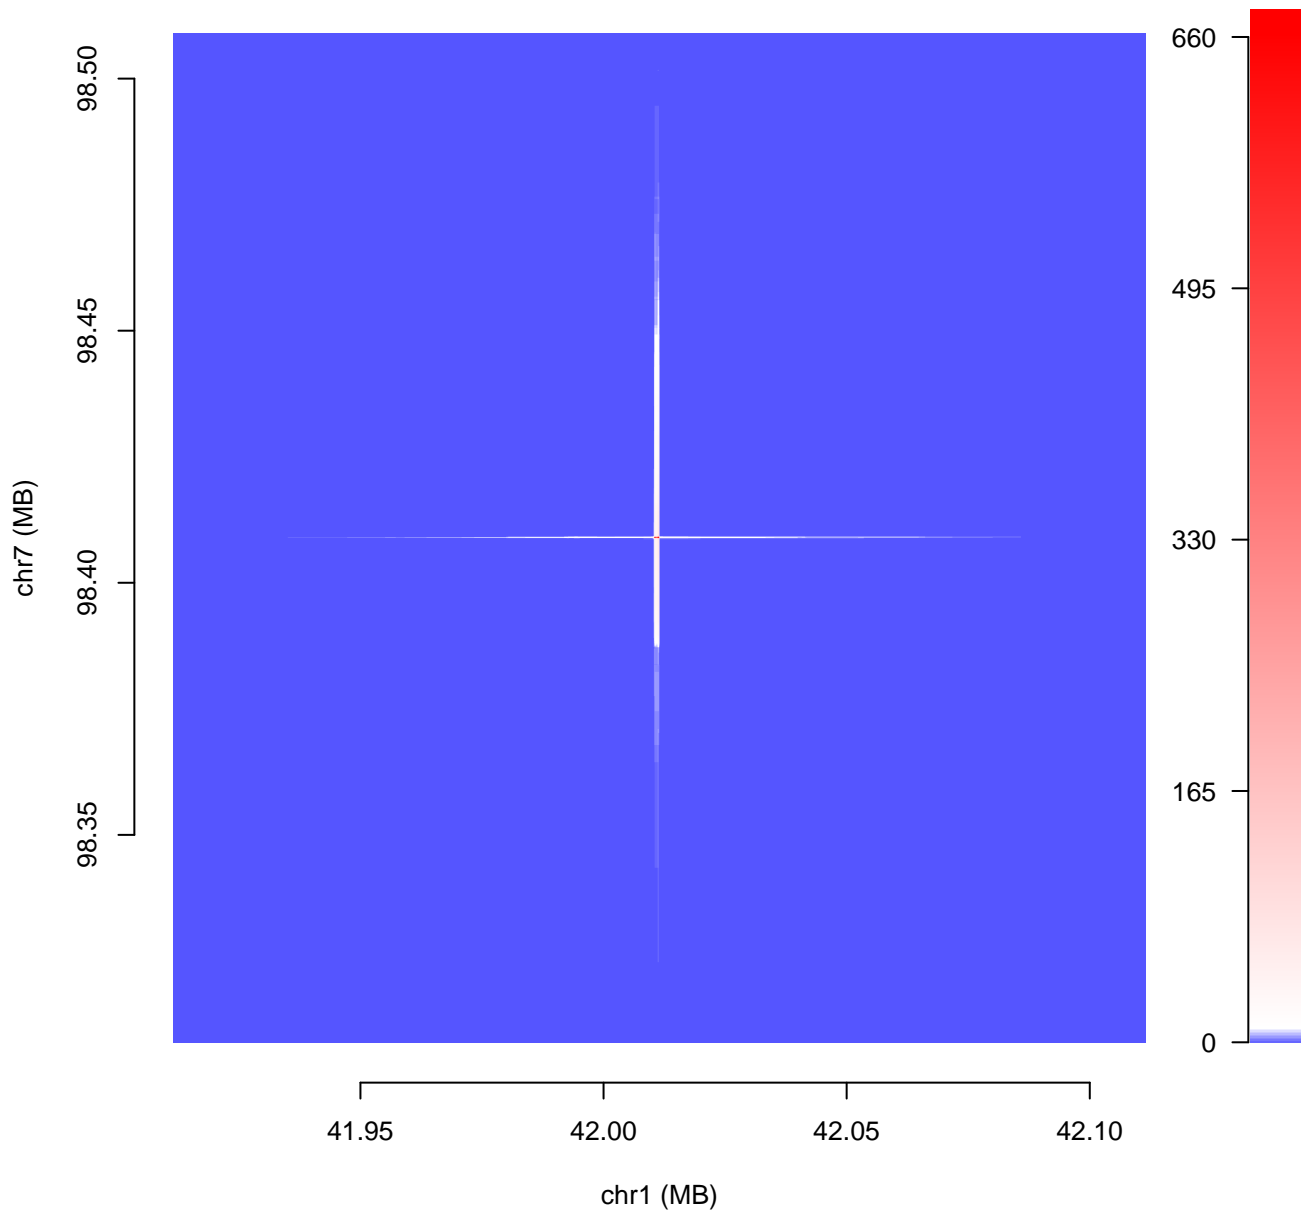

Supplement: Supplemental_Data.zip [file event_512.pdf › event_512.pdf]

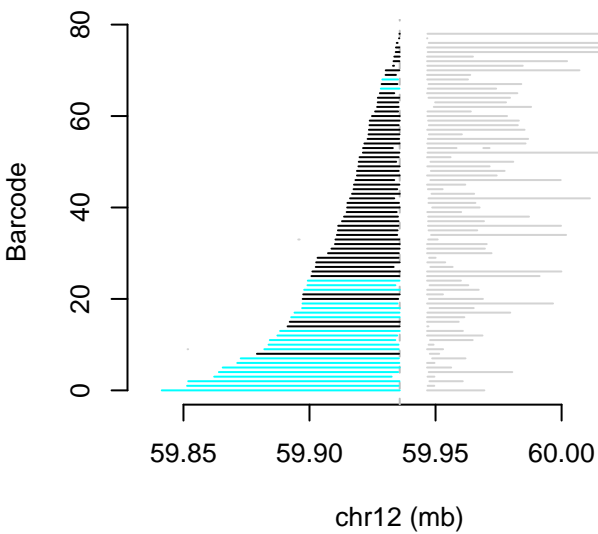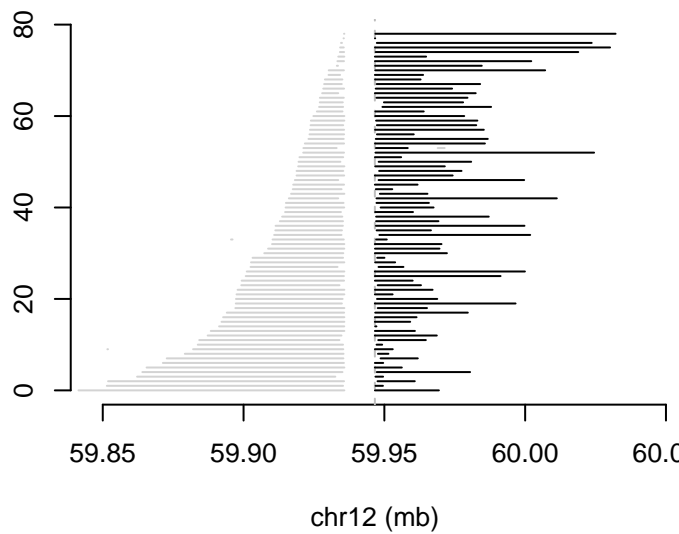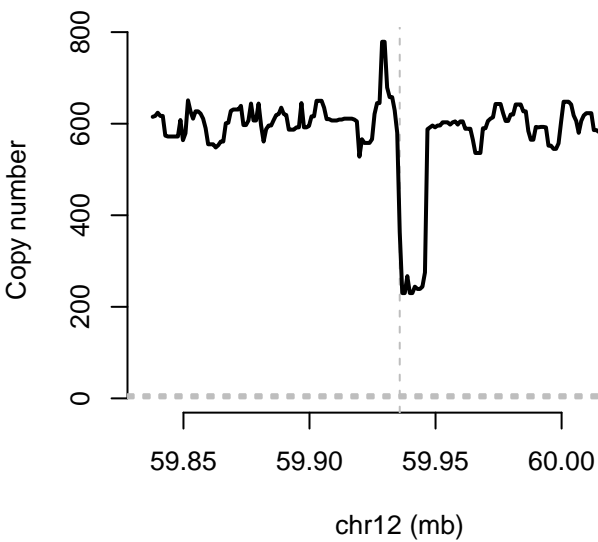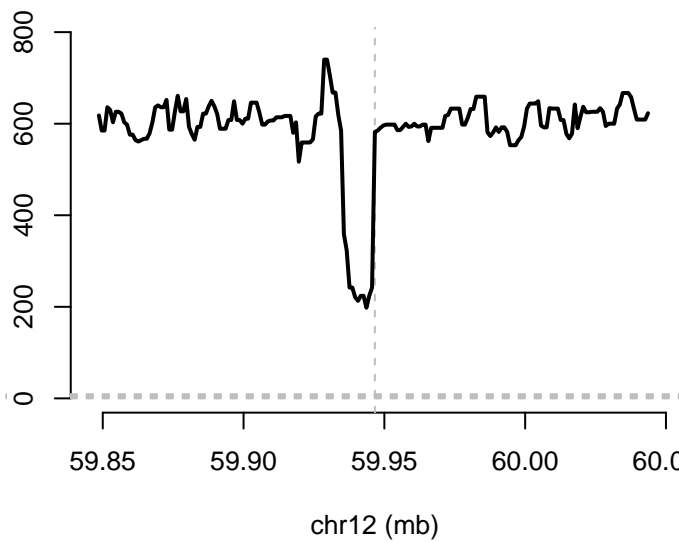

K562 chr12:59,946,631::chr12:59,935,796-+

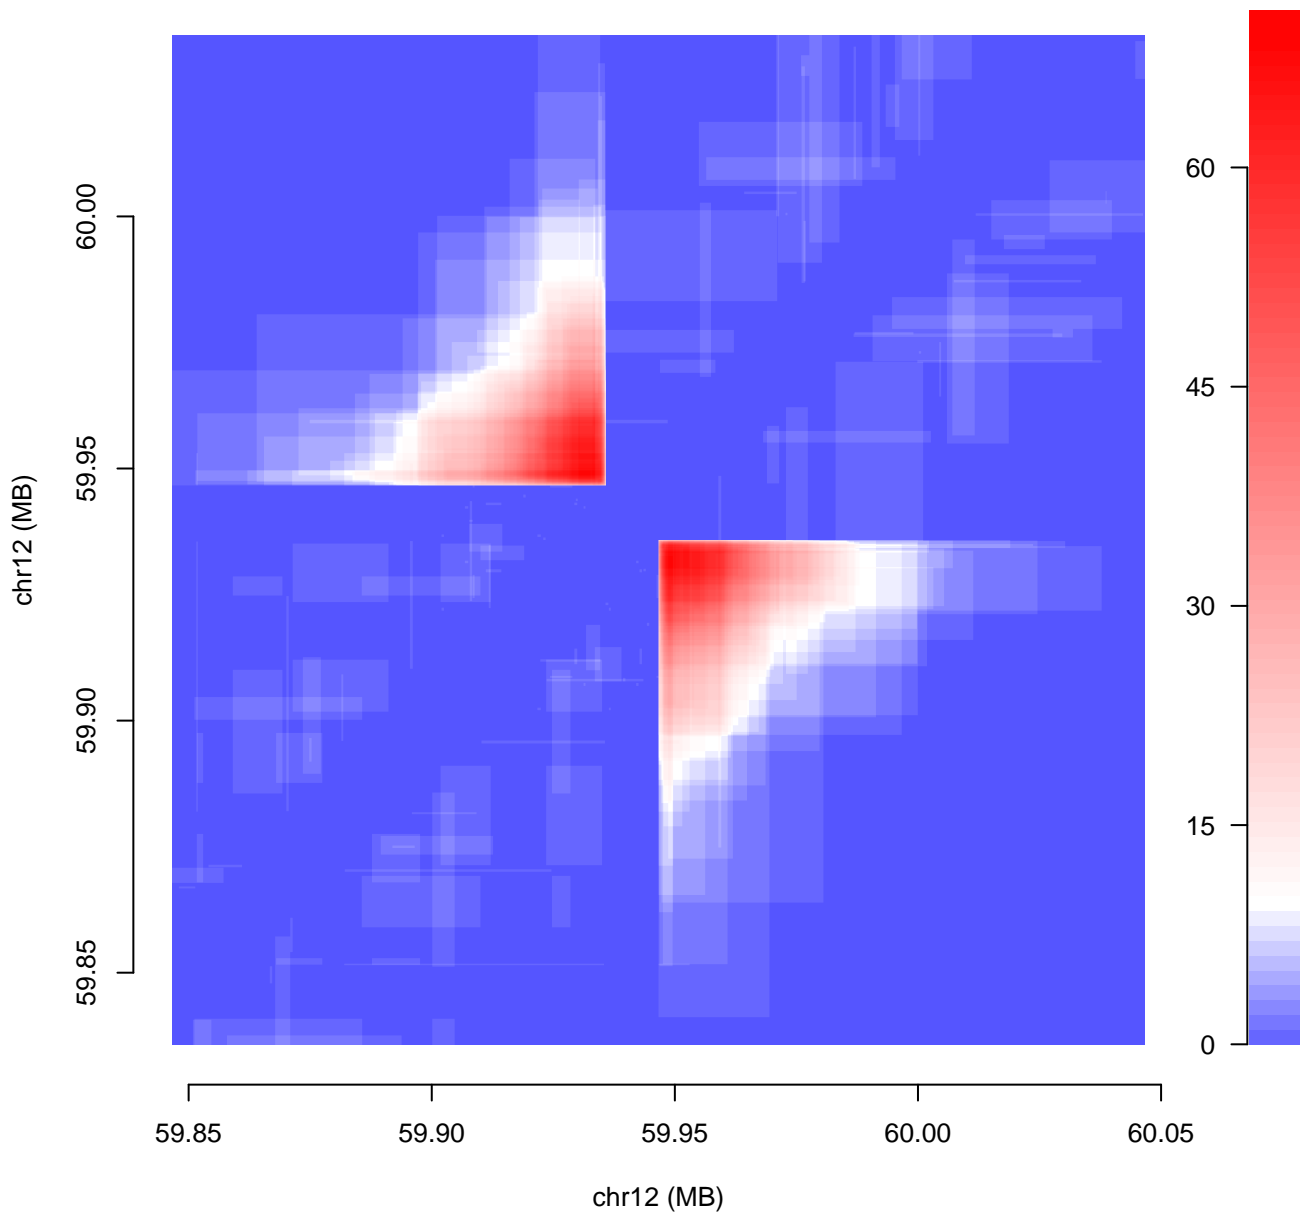

Supplement: Supplemental_Data.zip [file event_513.pdf › event_513.pdf]

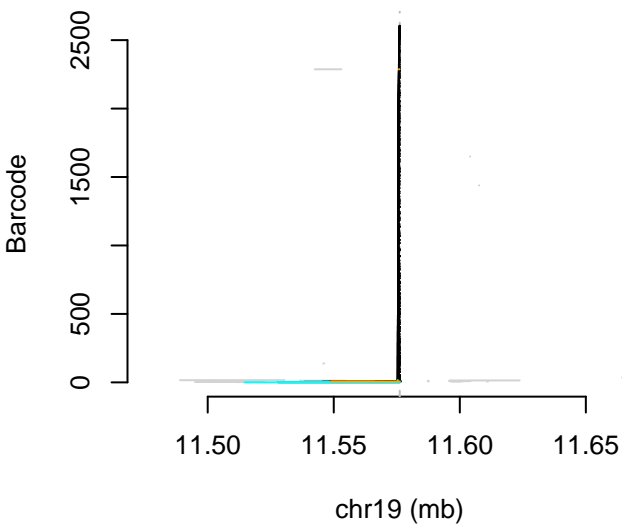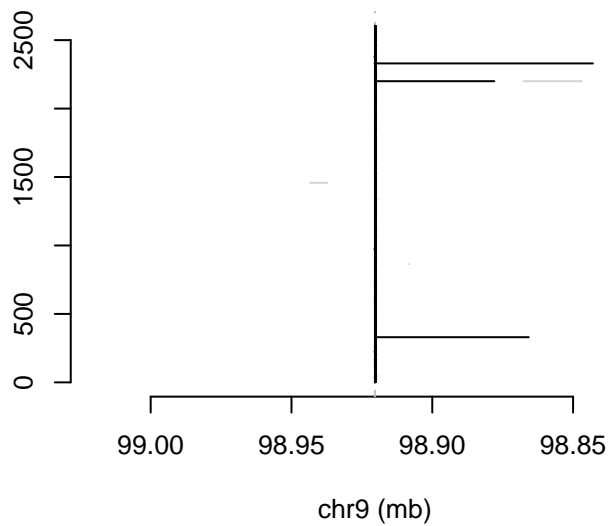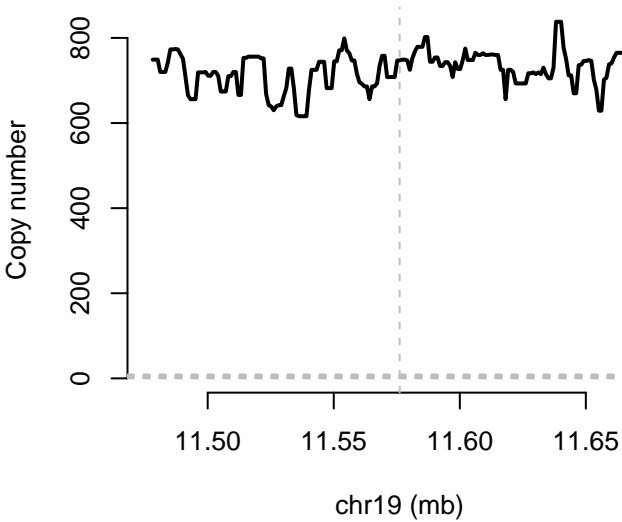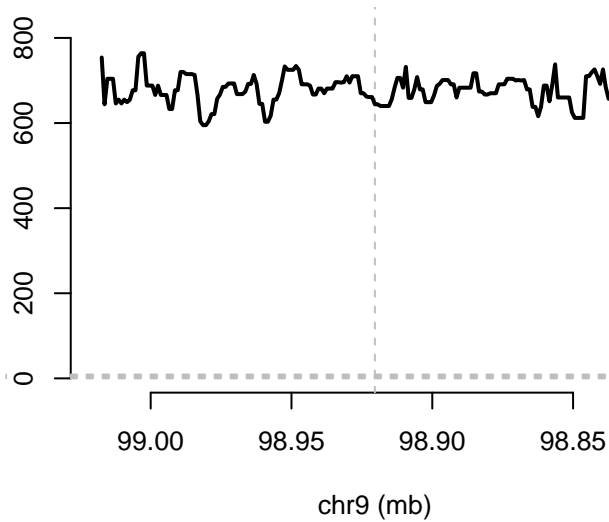

K562 chr19:11,576,176::chr9:98,920,383++

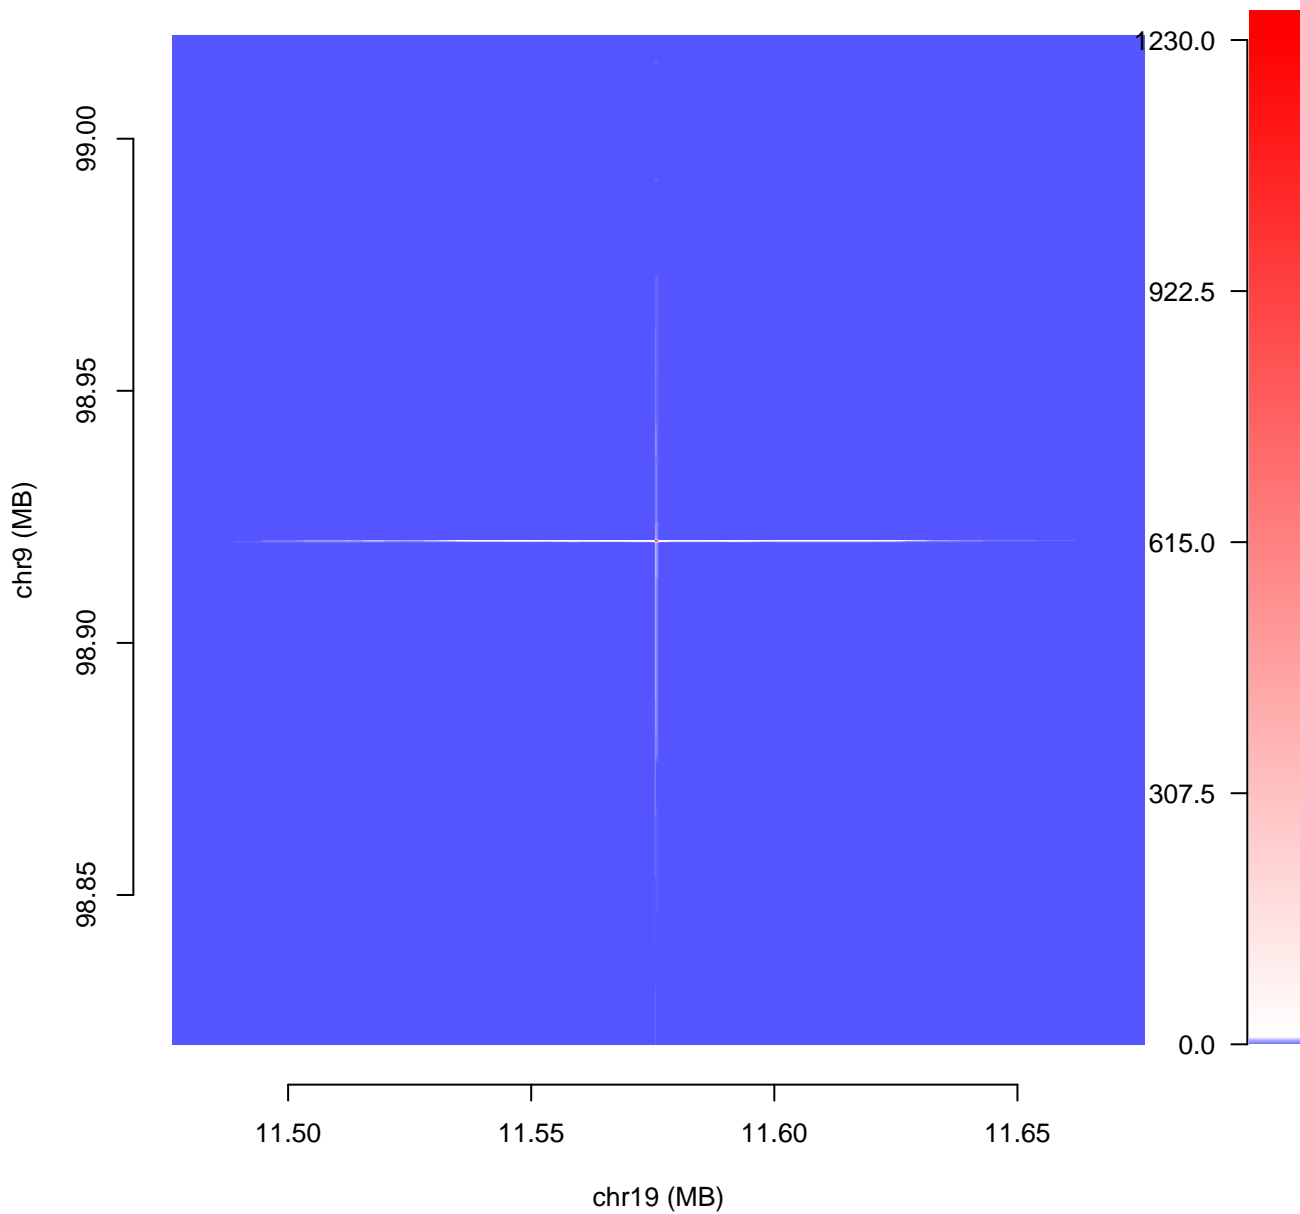

Supplement: Supplemental_Data.zip [file event_514.pdf › event_514.pdf]

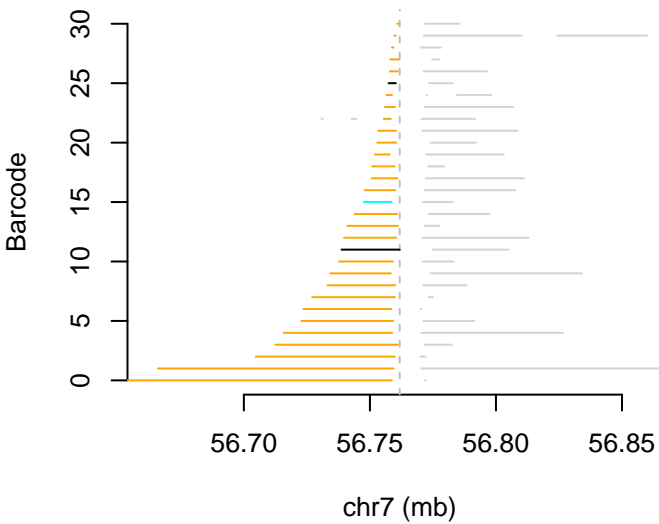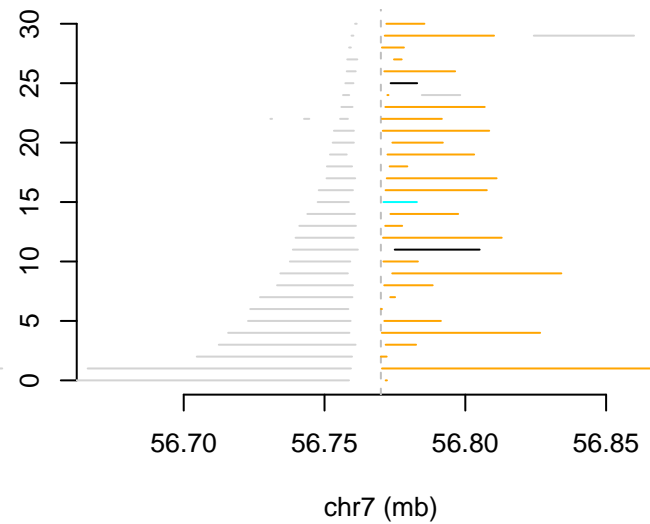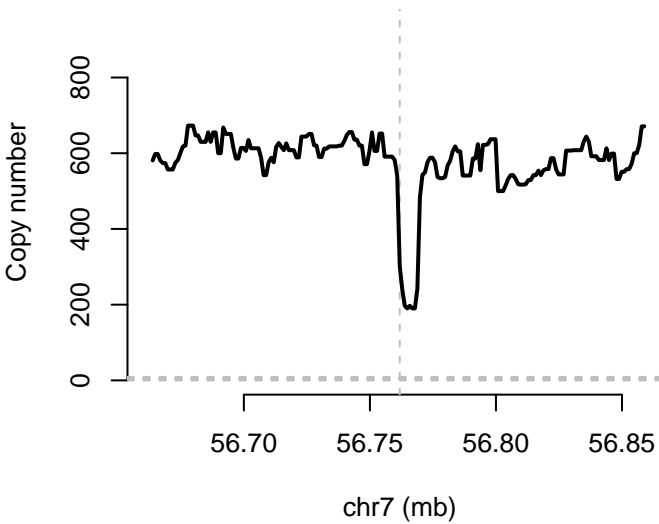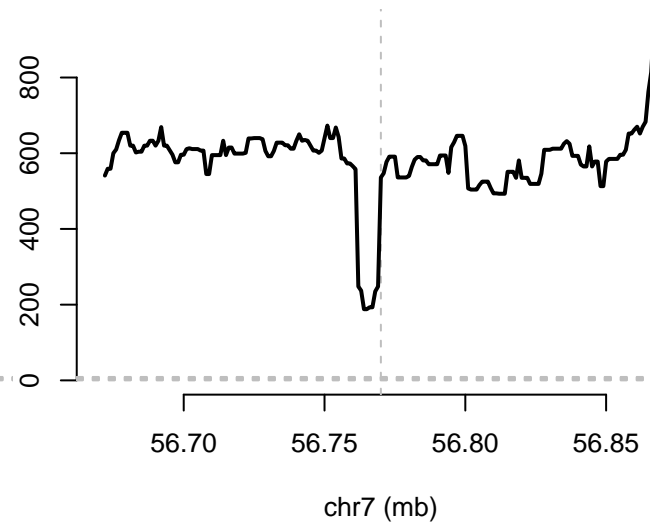

K562 chr7:56,761,836::chr7:56,770,014+-

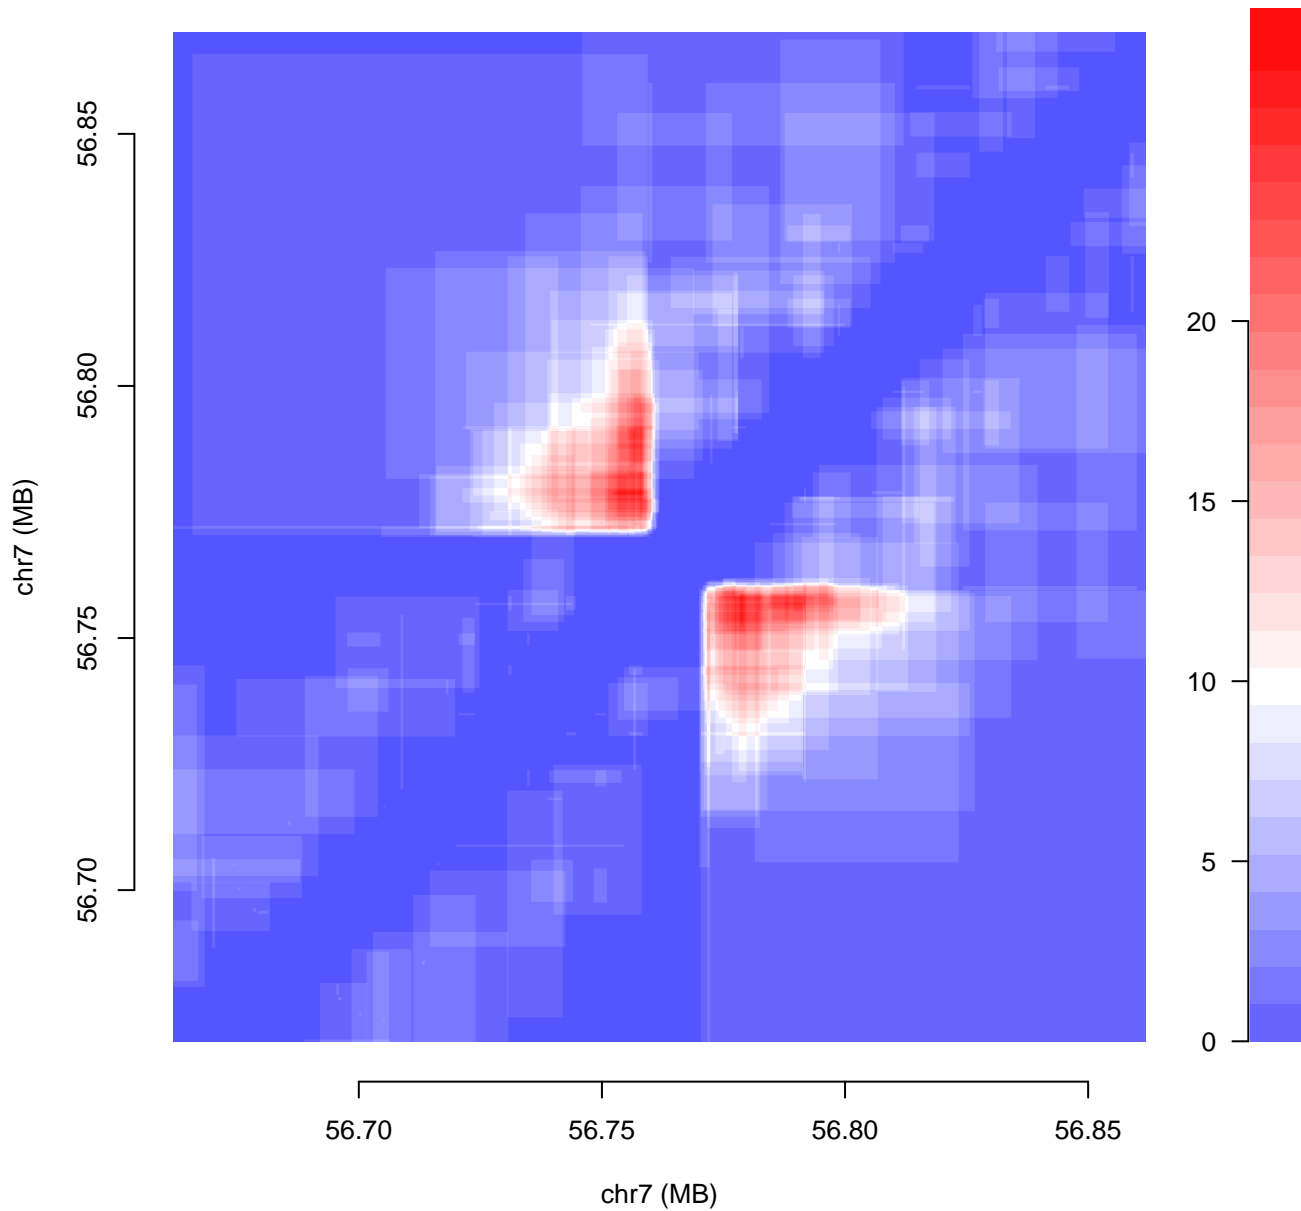

Supplement: Supplemental_Data.zip [file event_515.pdf › event_515.pdf]

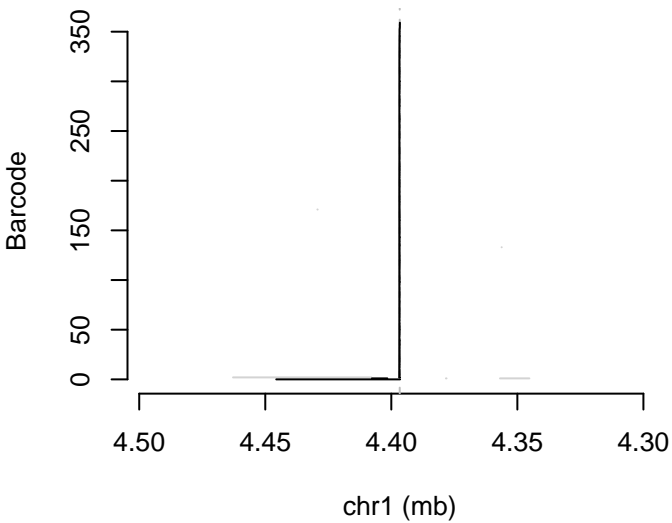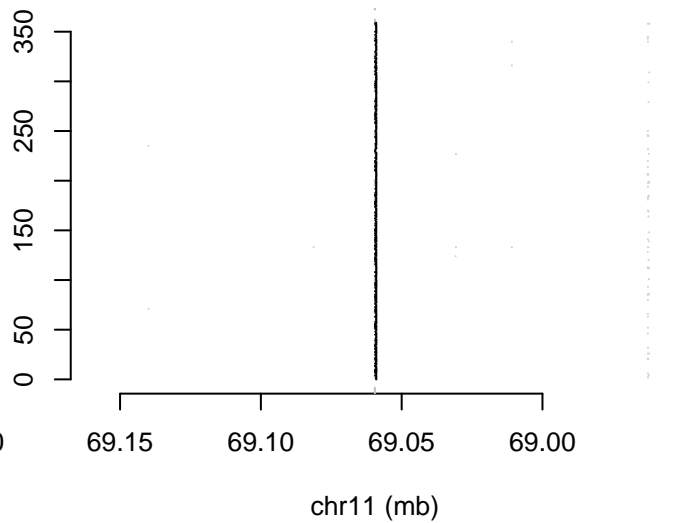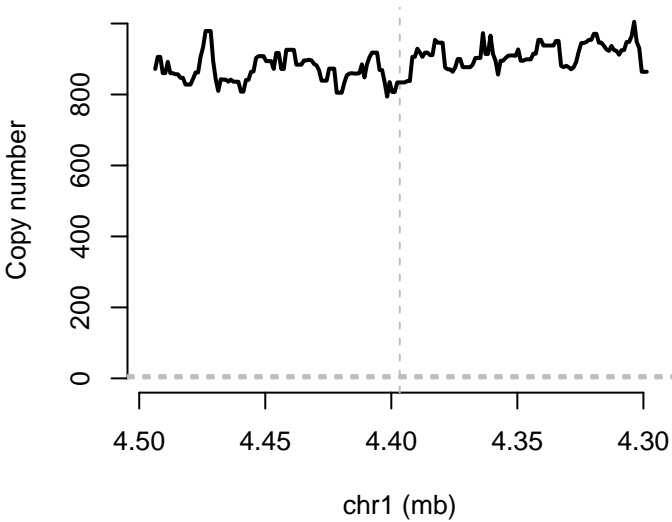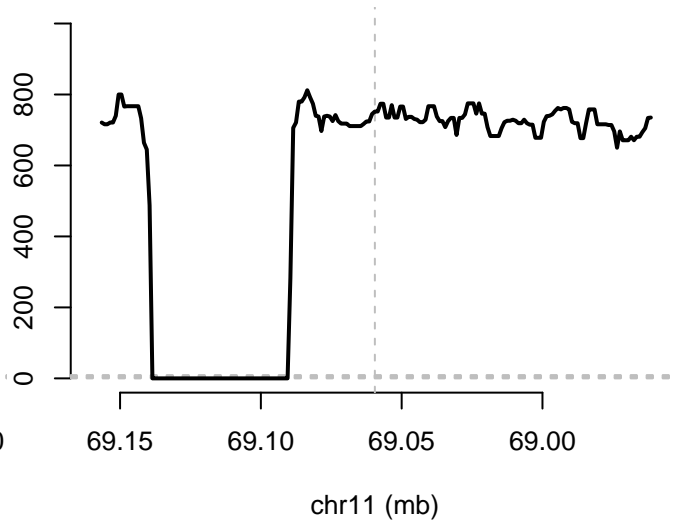

K562 chr1:4,396,655::chr11:69,059,512-+

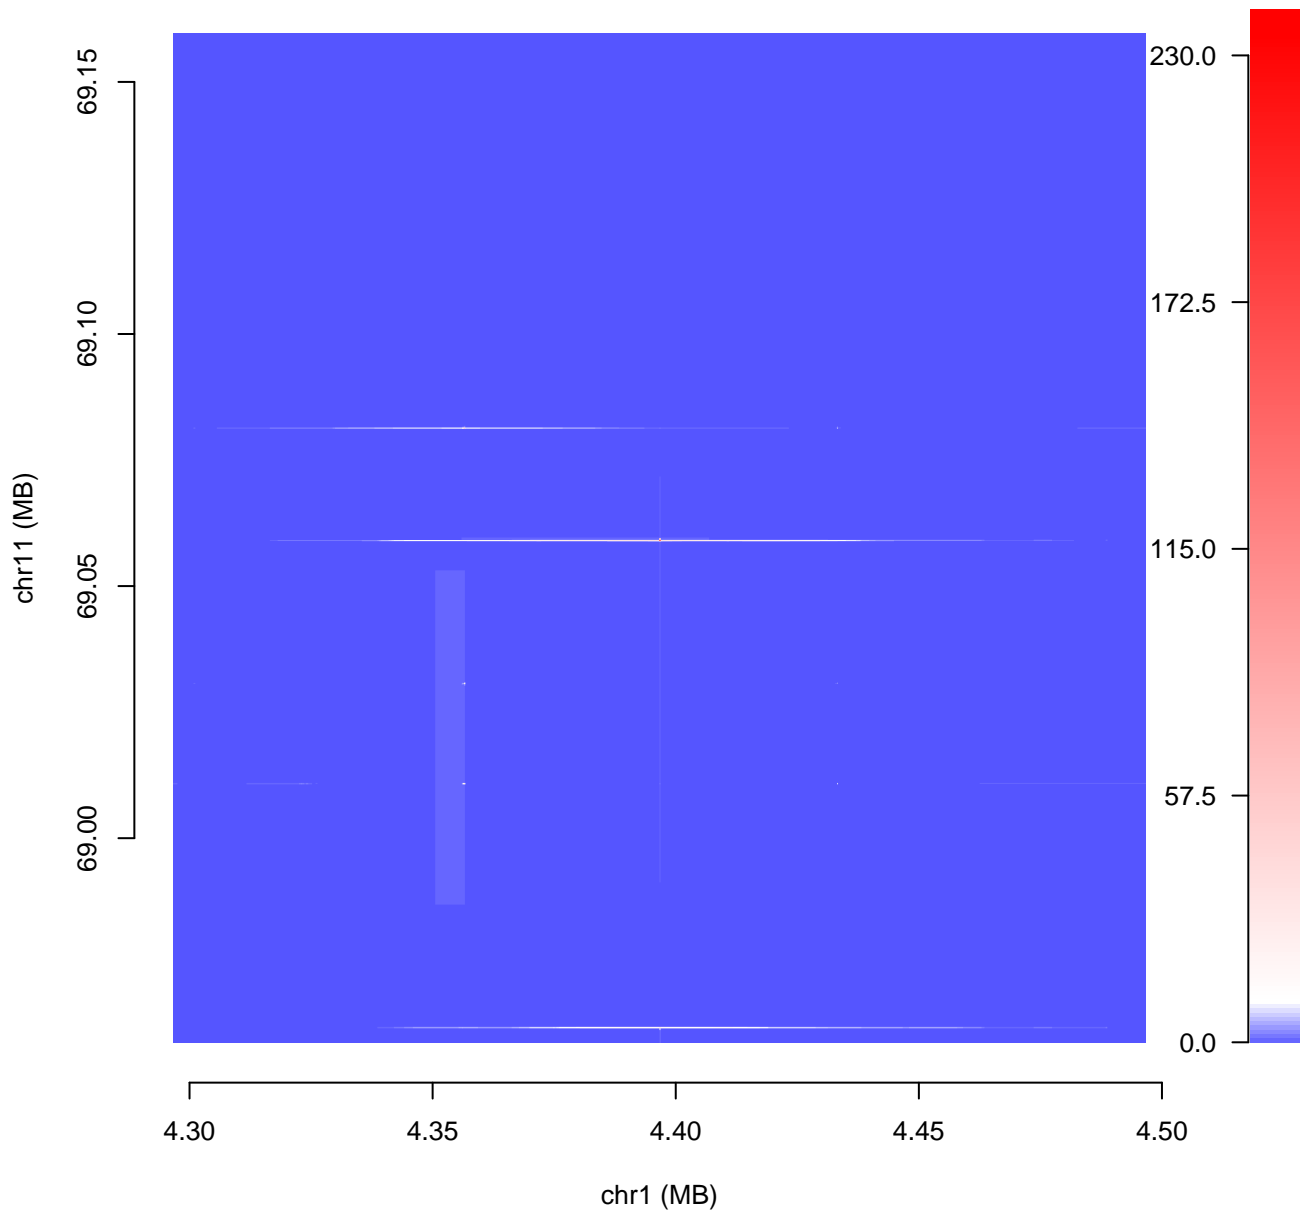

Supplement: Supplemental_Data.zip [file event_516.pdf › event_516.pdf]

Barcode

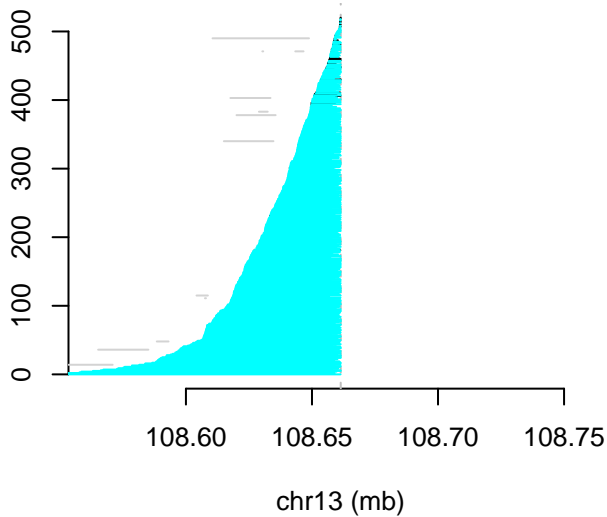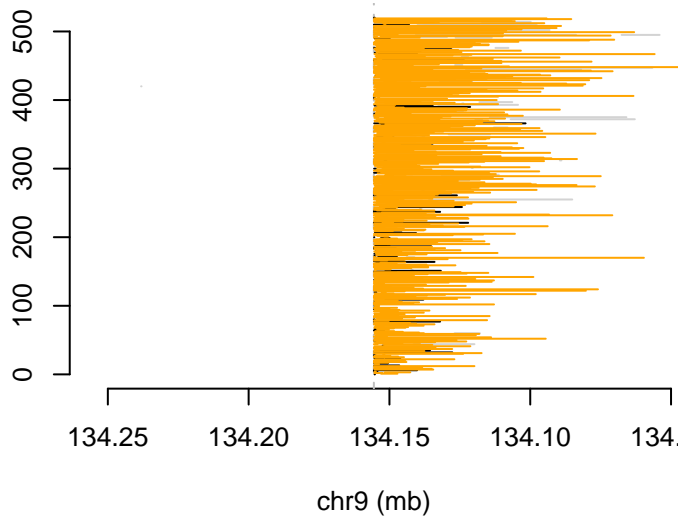

Copy number

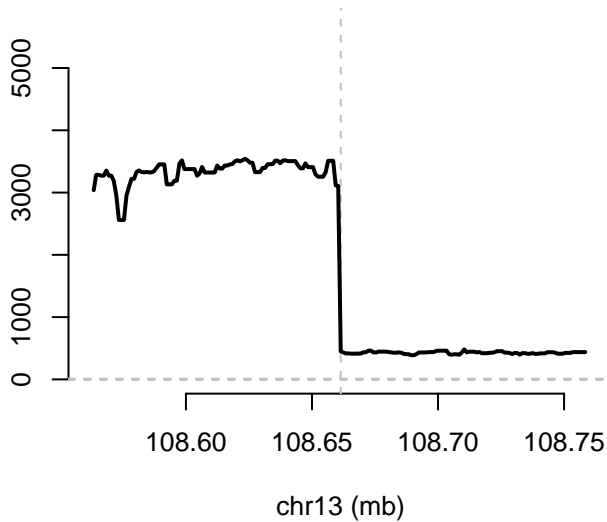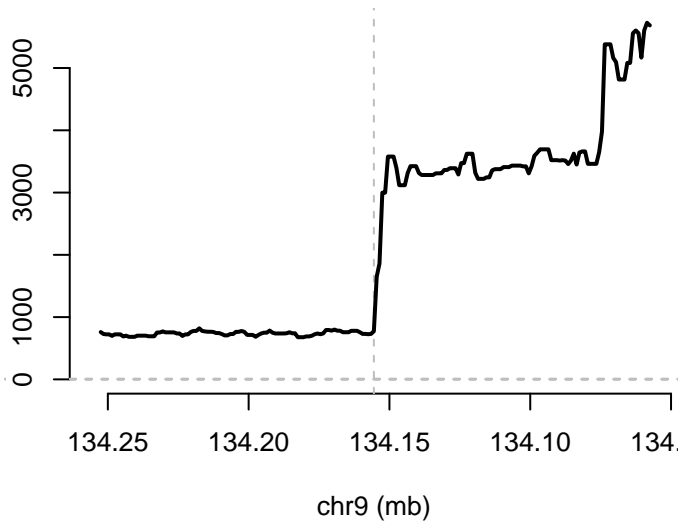

**K562 chr13:108,661,411::chr9:134,155,524++**

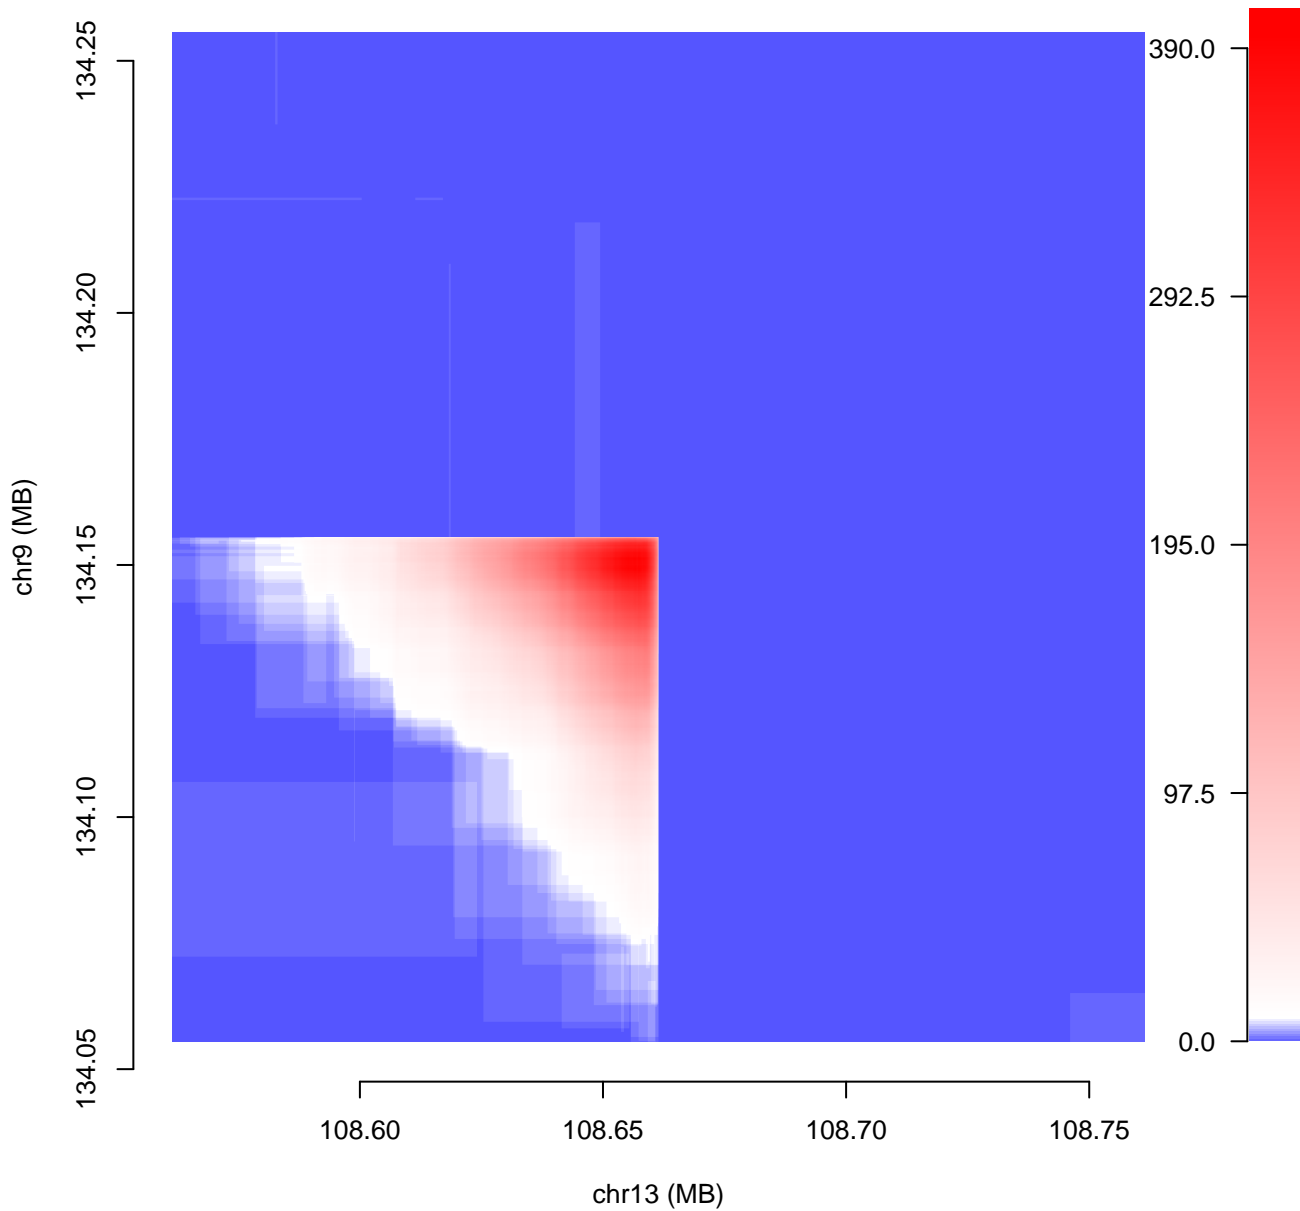

Supplement: Supplemental_Data.zip [file event_517.pdf › event_517.pdf]

Barcode

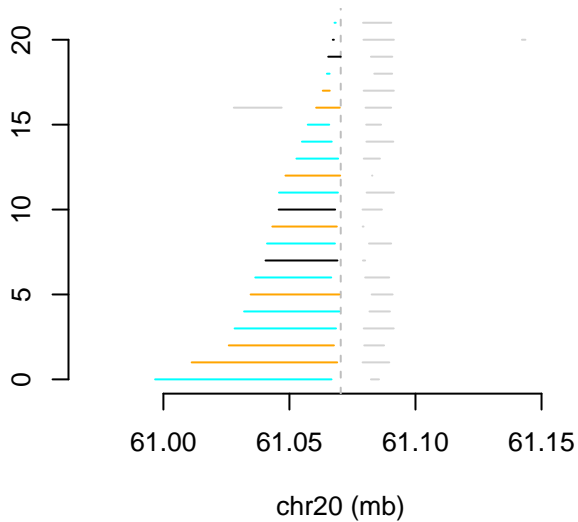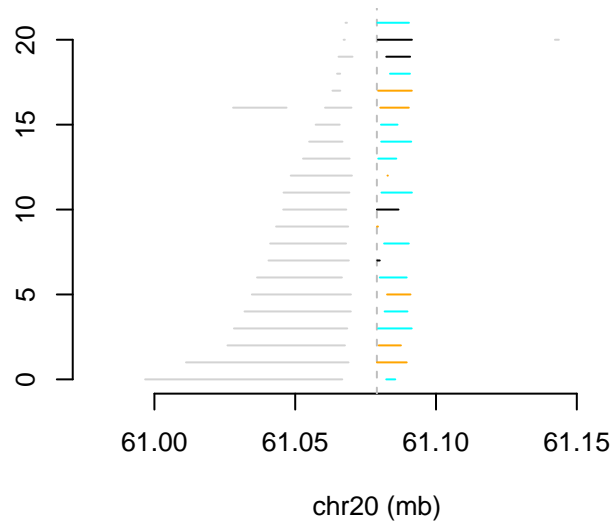

Copy number

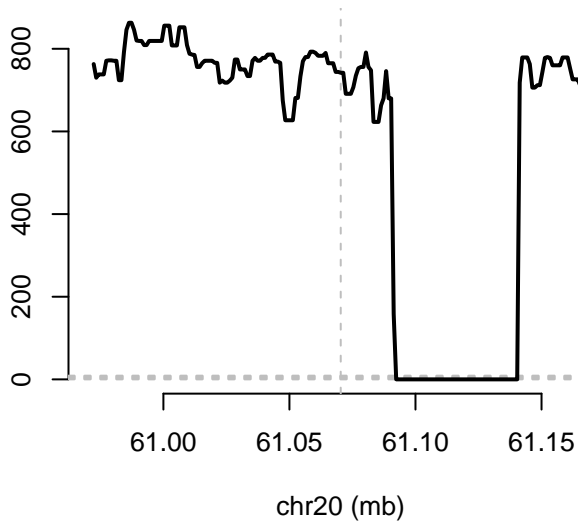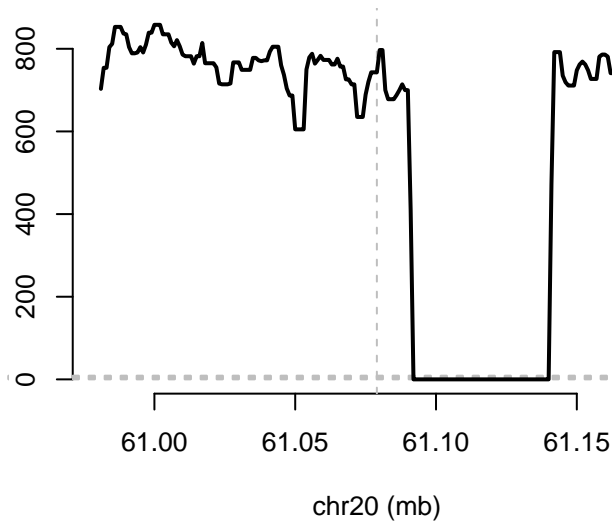

K562 chr20:61,070,355::chr20:61,078,999+--

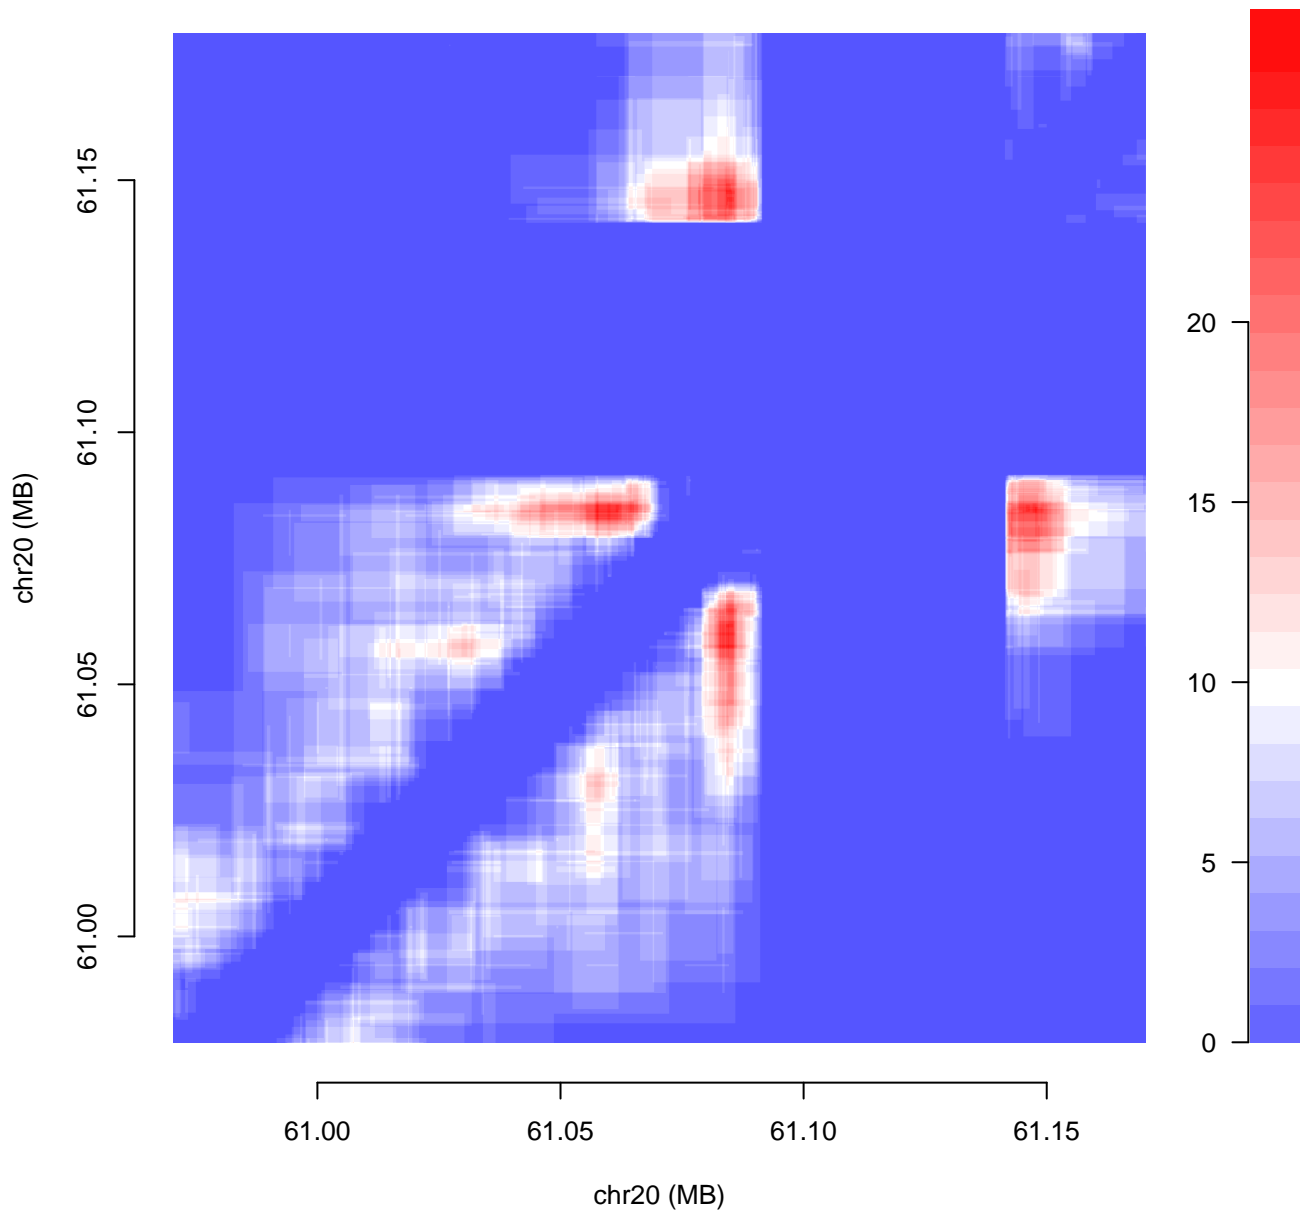

Supplement: Supplemental_Data.zip [file event_518.pdf › event_518.pdf]

Barcode

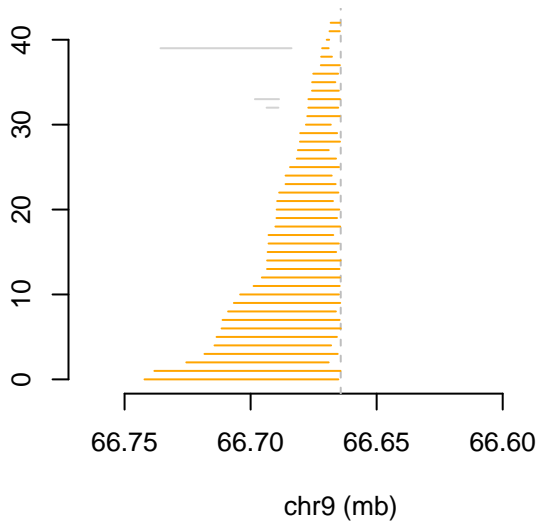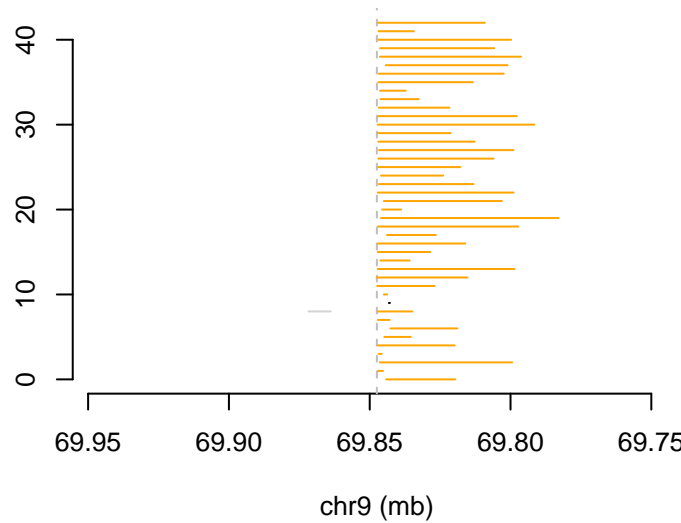

Copy number

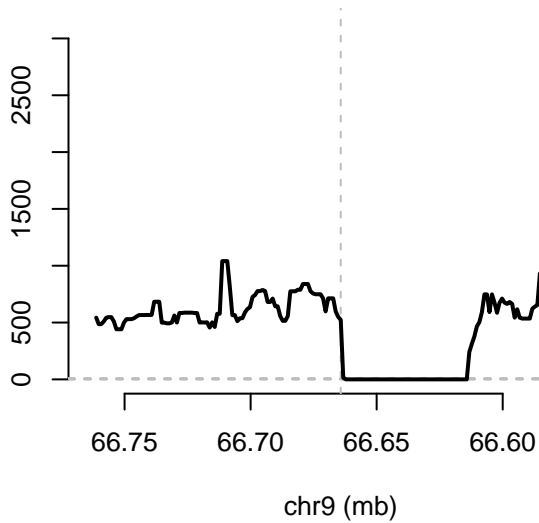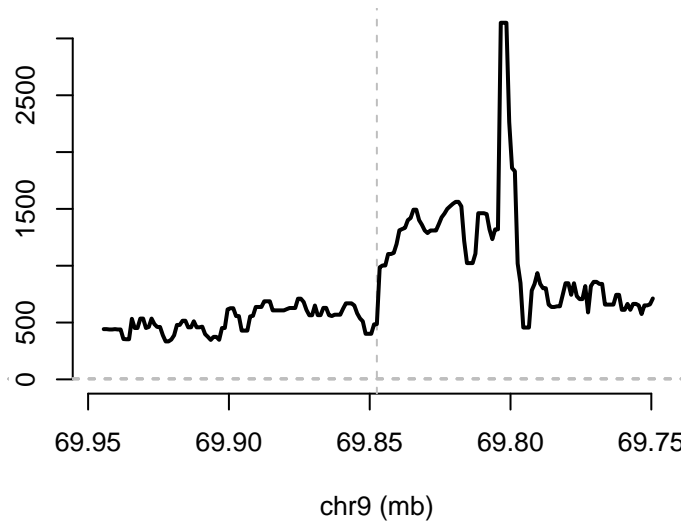

K562 chr9:66,64,248::chr9:69,847,456--+

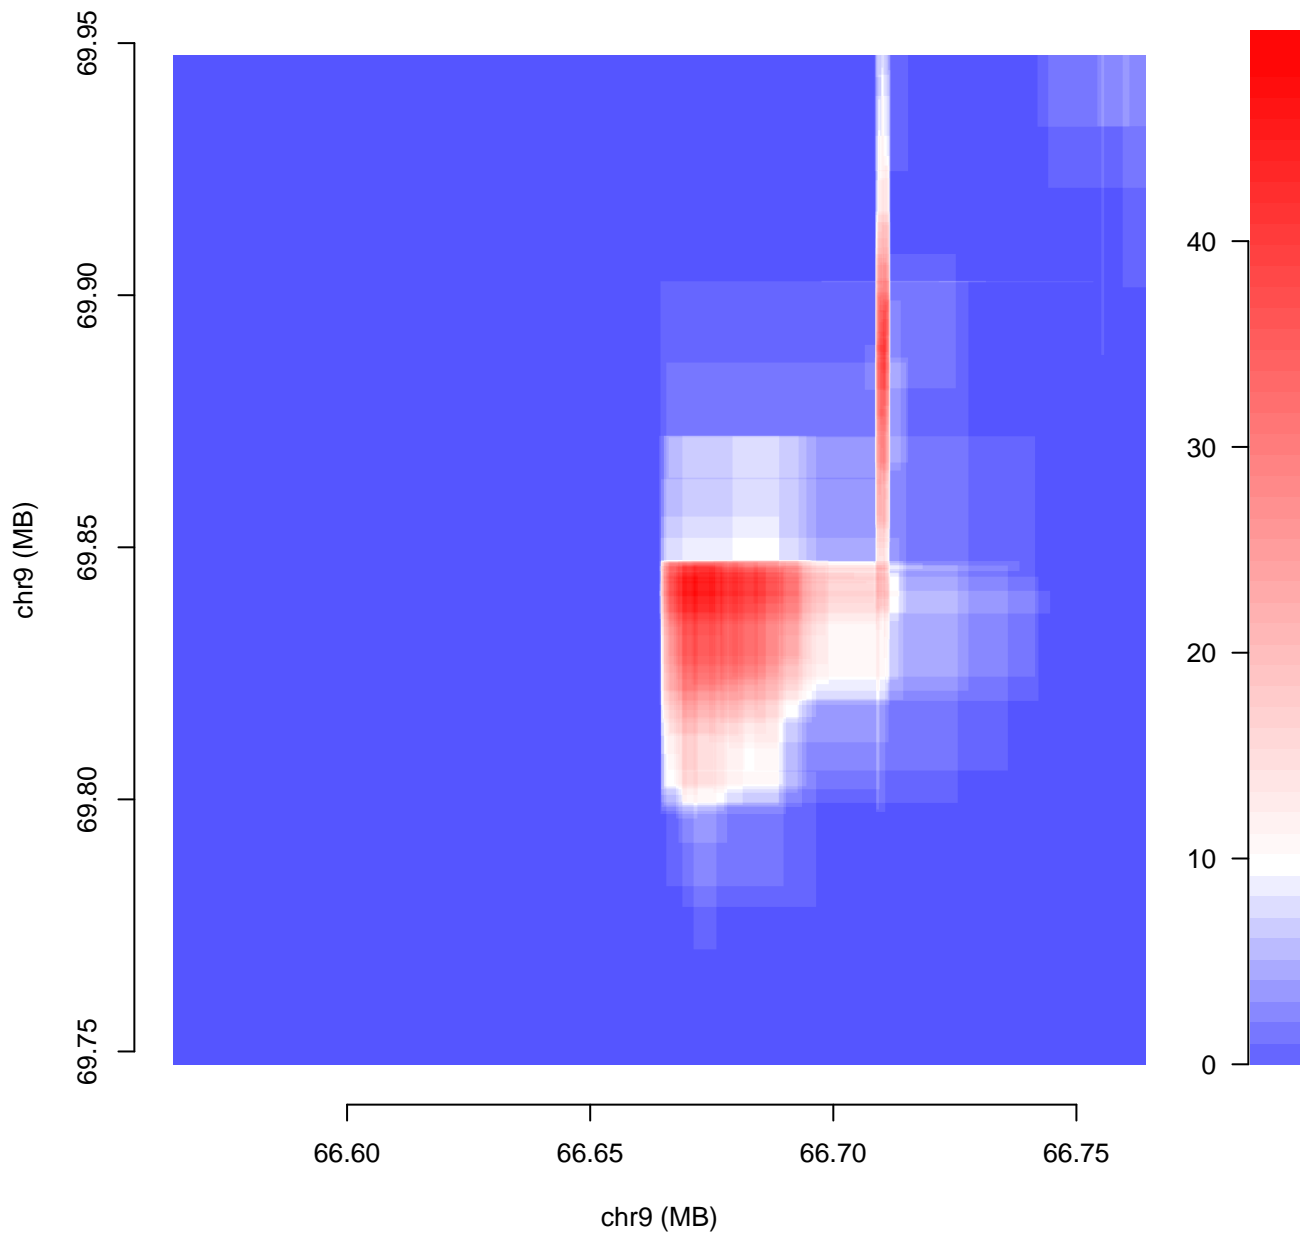

Supplement: Supplemental_Data.zip [file event_519.pdf › event_519.pdf]

Barcode

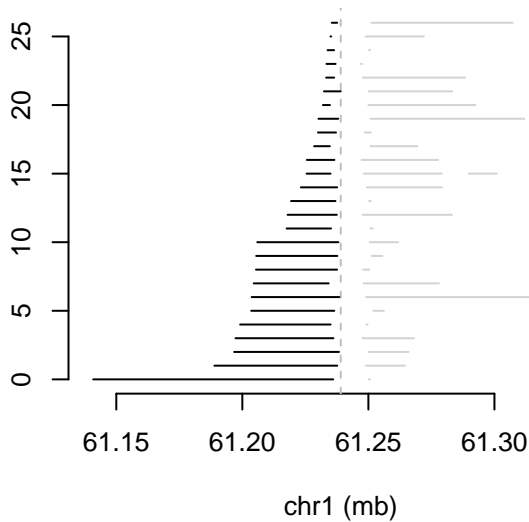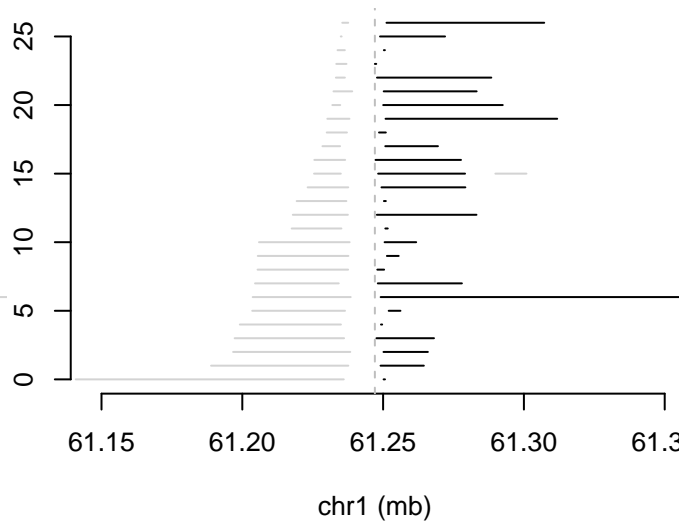

Copy number

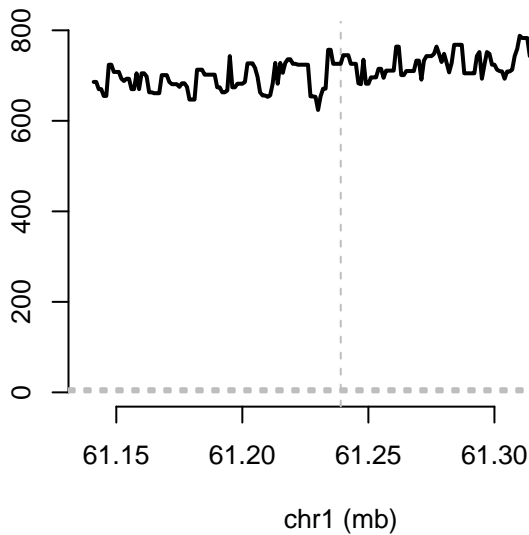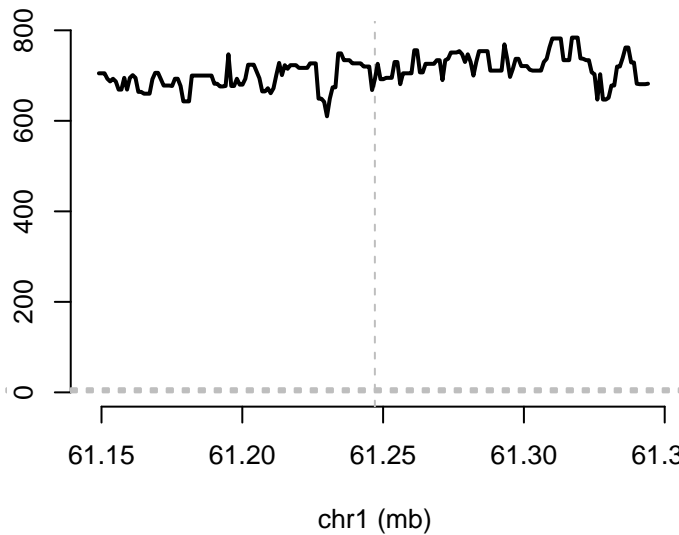

K562 chr1:61,247,077::chr1:61,239,033-+

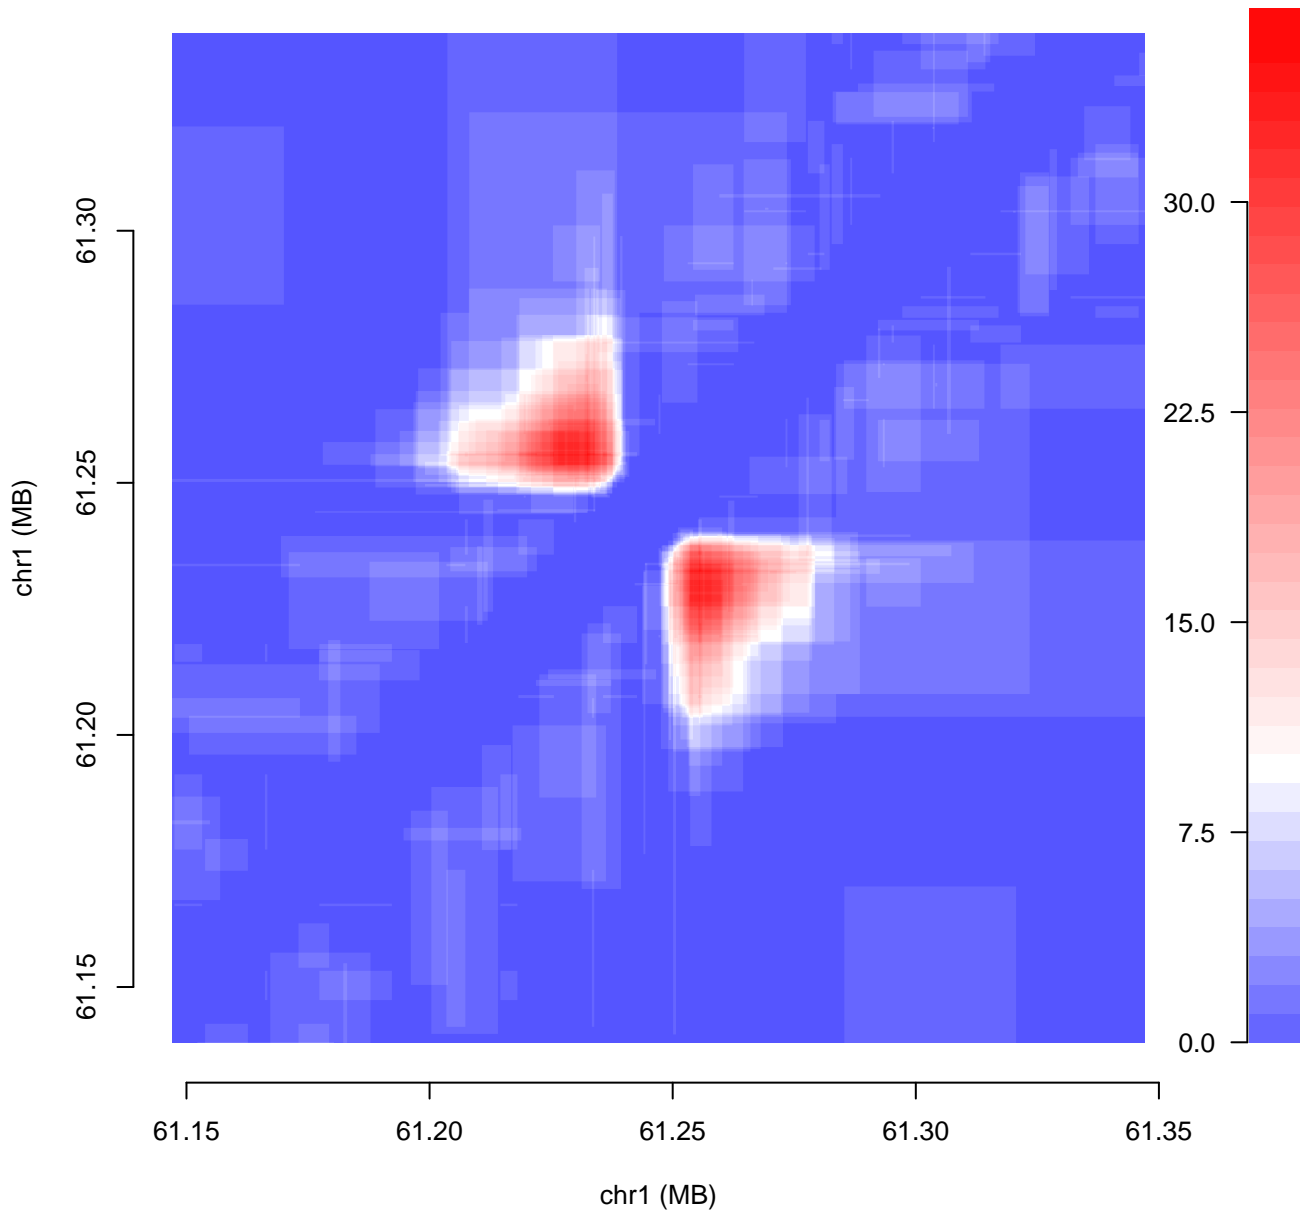

Supplement: Supplemental_Data.zip [file event_52.pdf › event_52.pdf]

Barcode

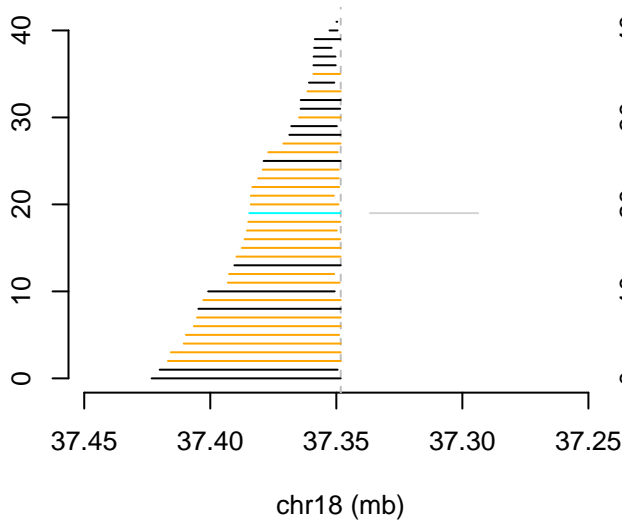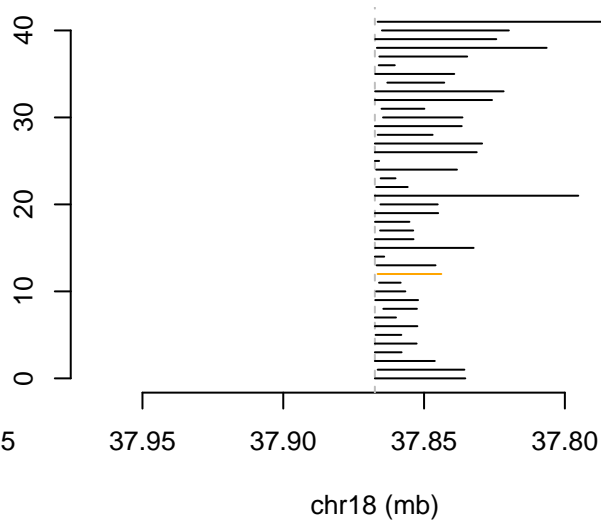

Copy number

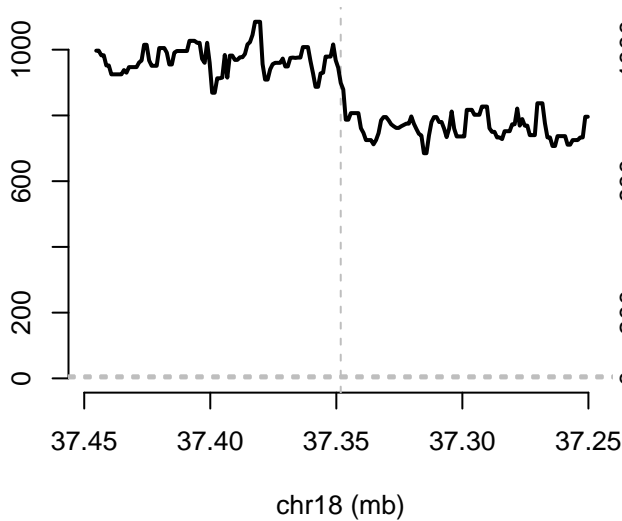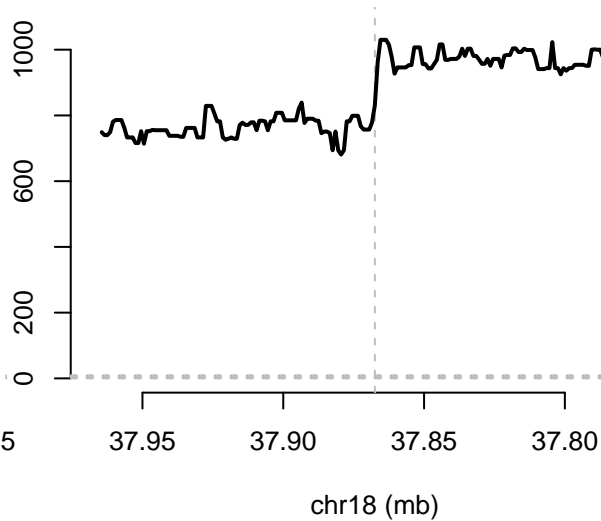

K562 chr18:37,867,472::chr18:37,348,246+-

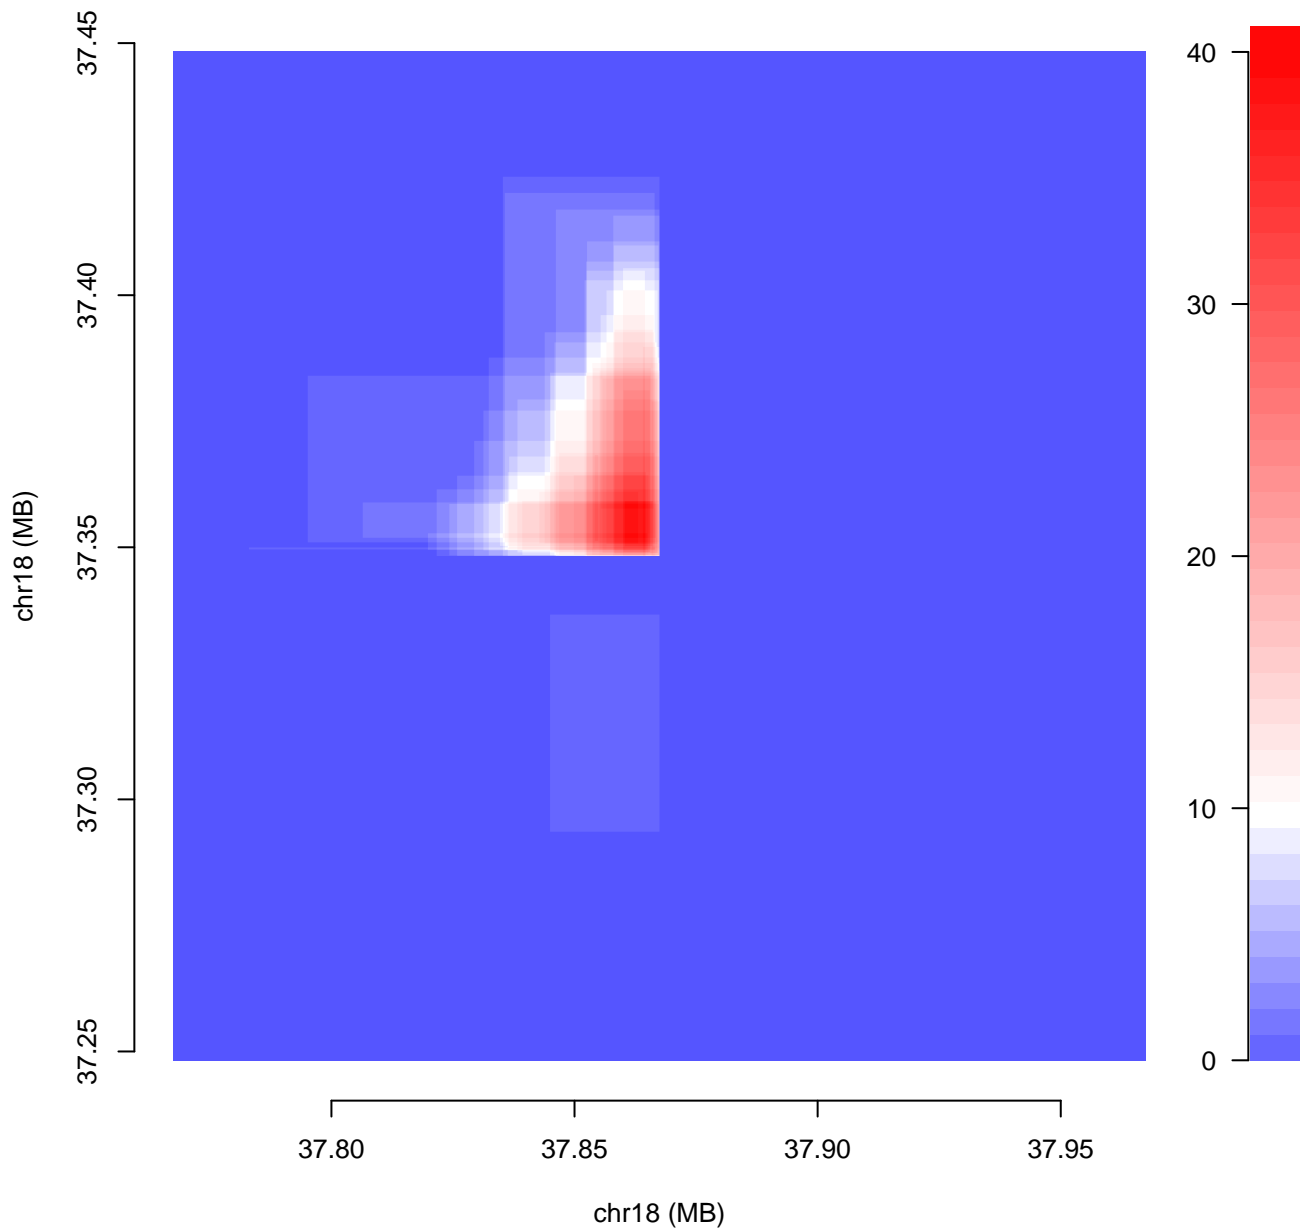

Supplement: Supplemental_Data.zip [file event_520.pdf › event_520.pdf]

Barcode

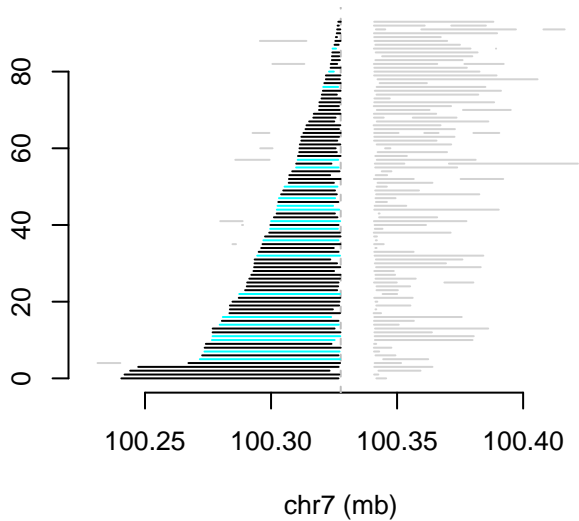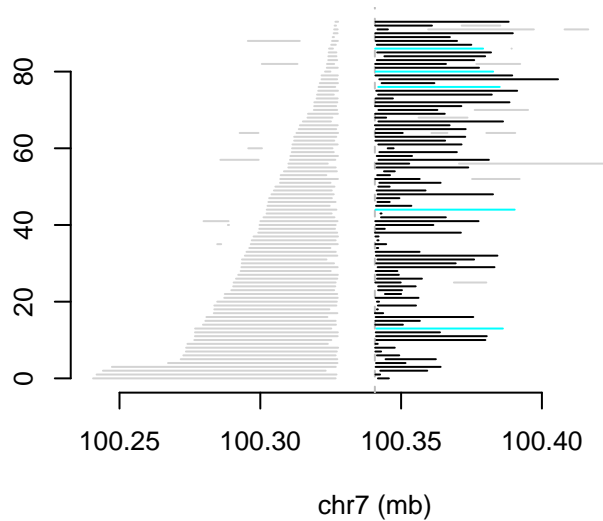

Copy number

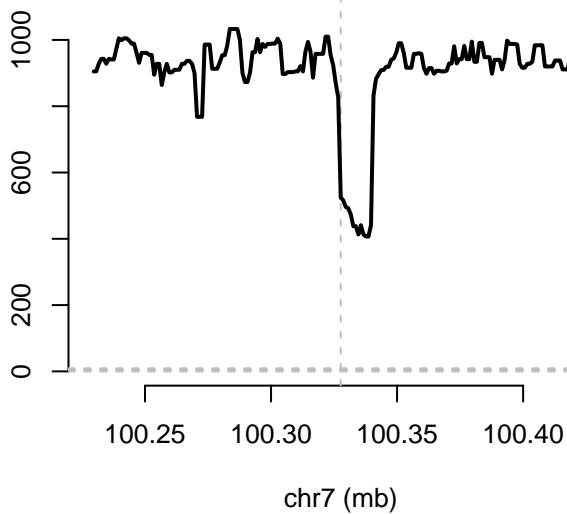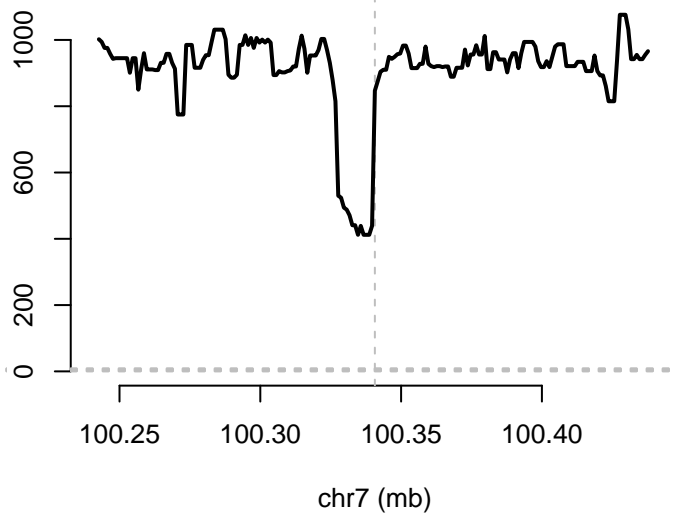

K562 chr7:100,340,686::chr7:100,327,648-+

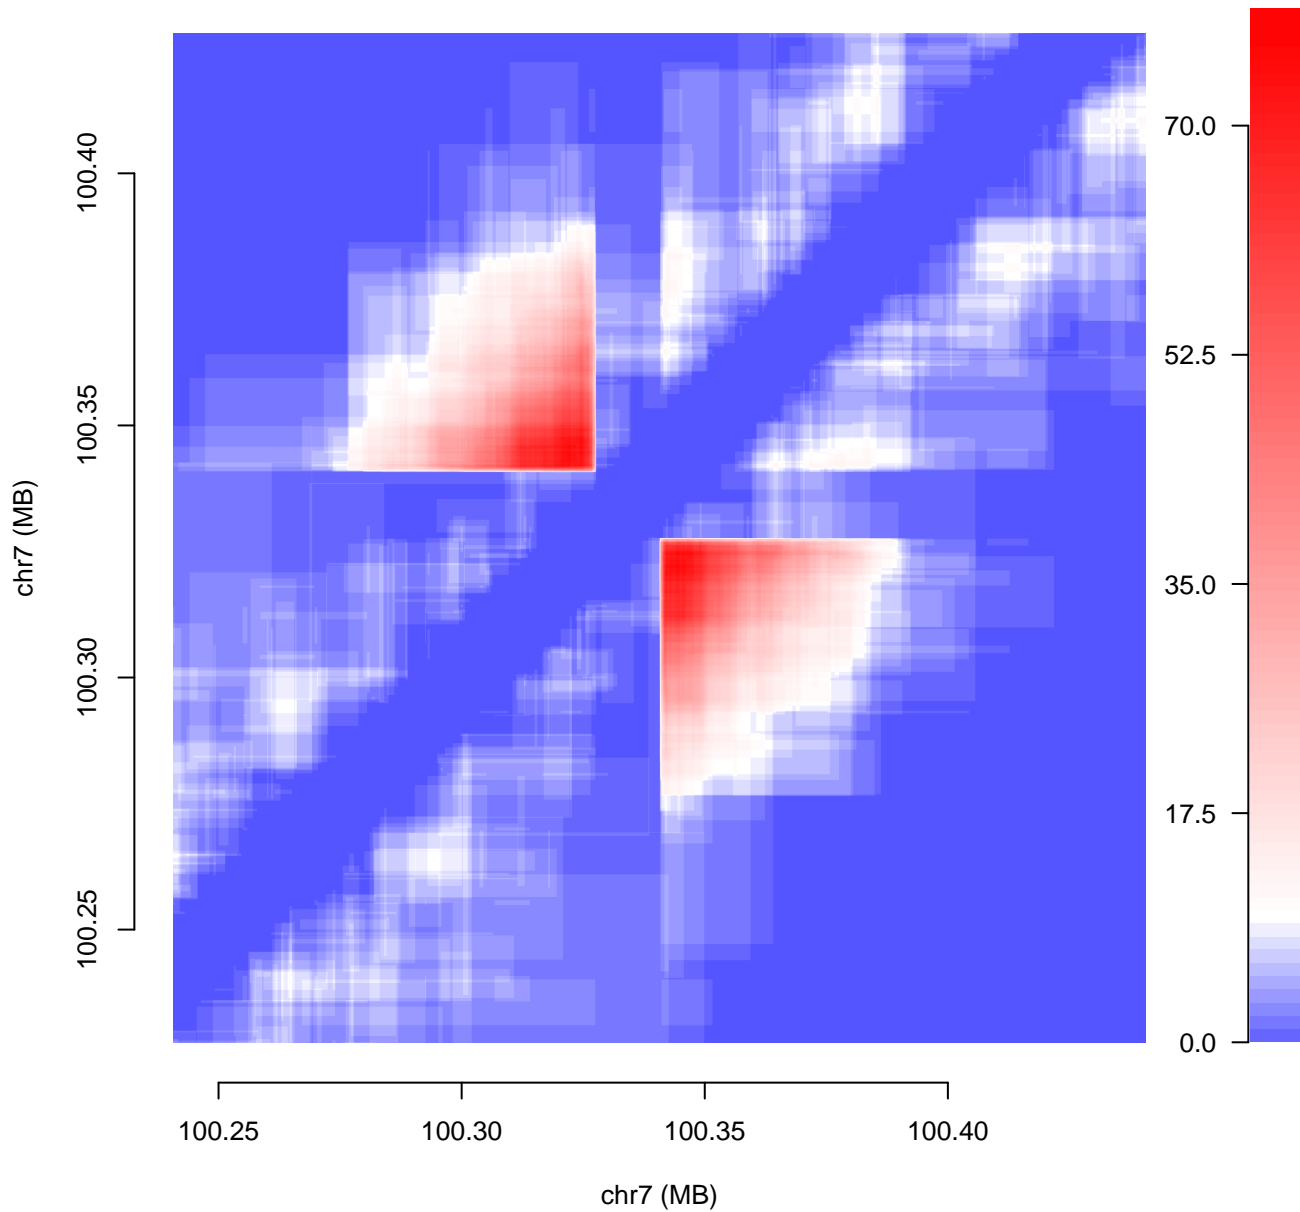

Supplement: Supplemental_Data.zip [file event_521.pdf › event_521.pdf]

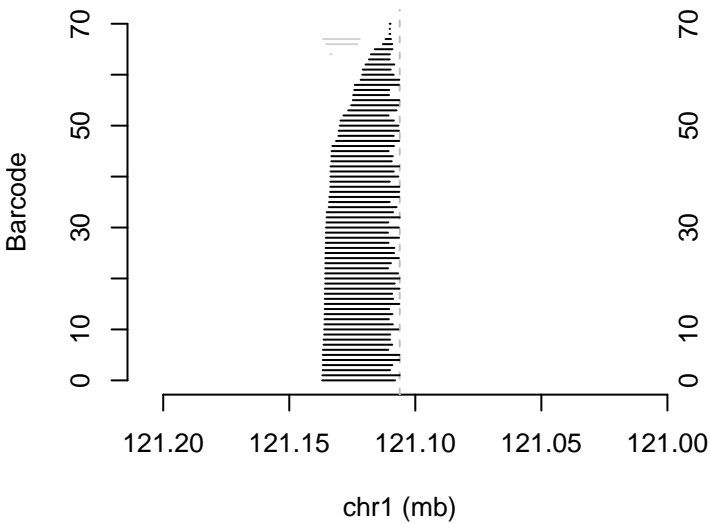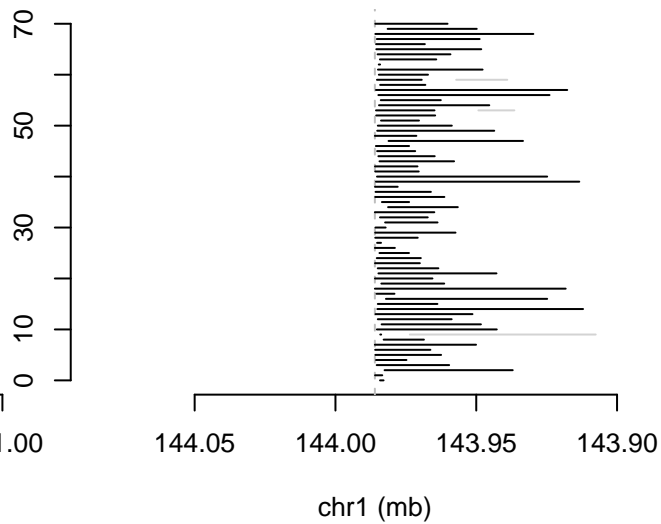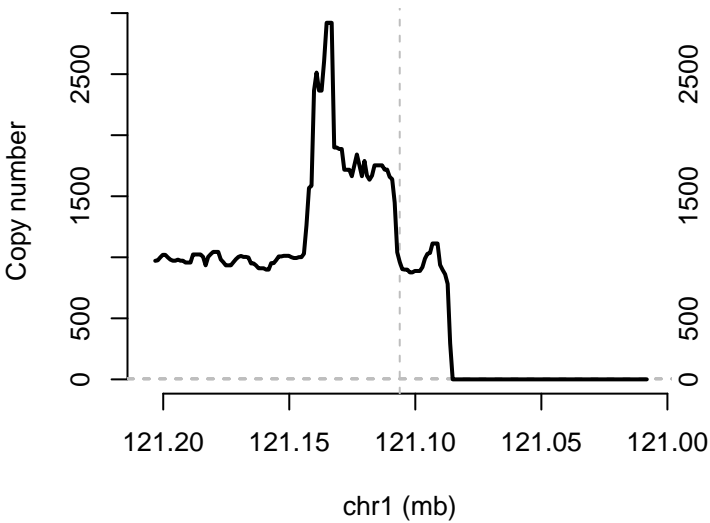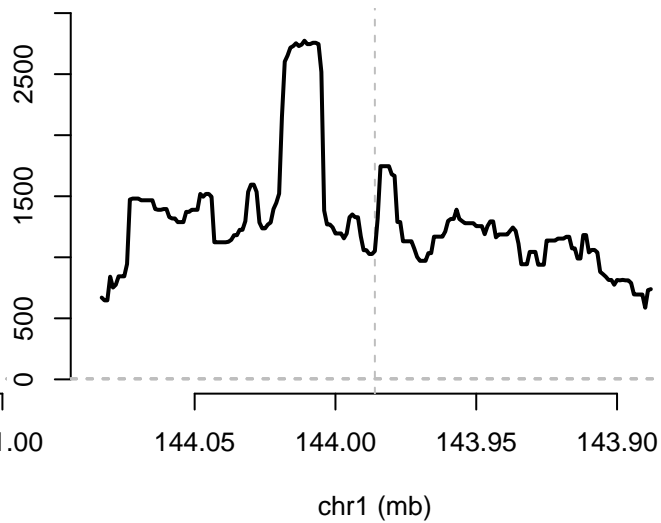

K562 chr1:143,986,003::chr1:121,106,177+-

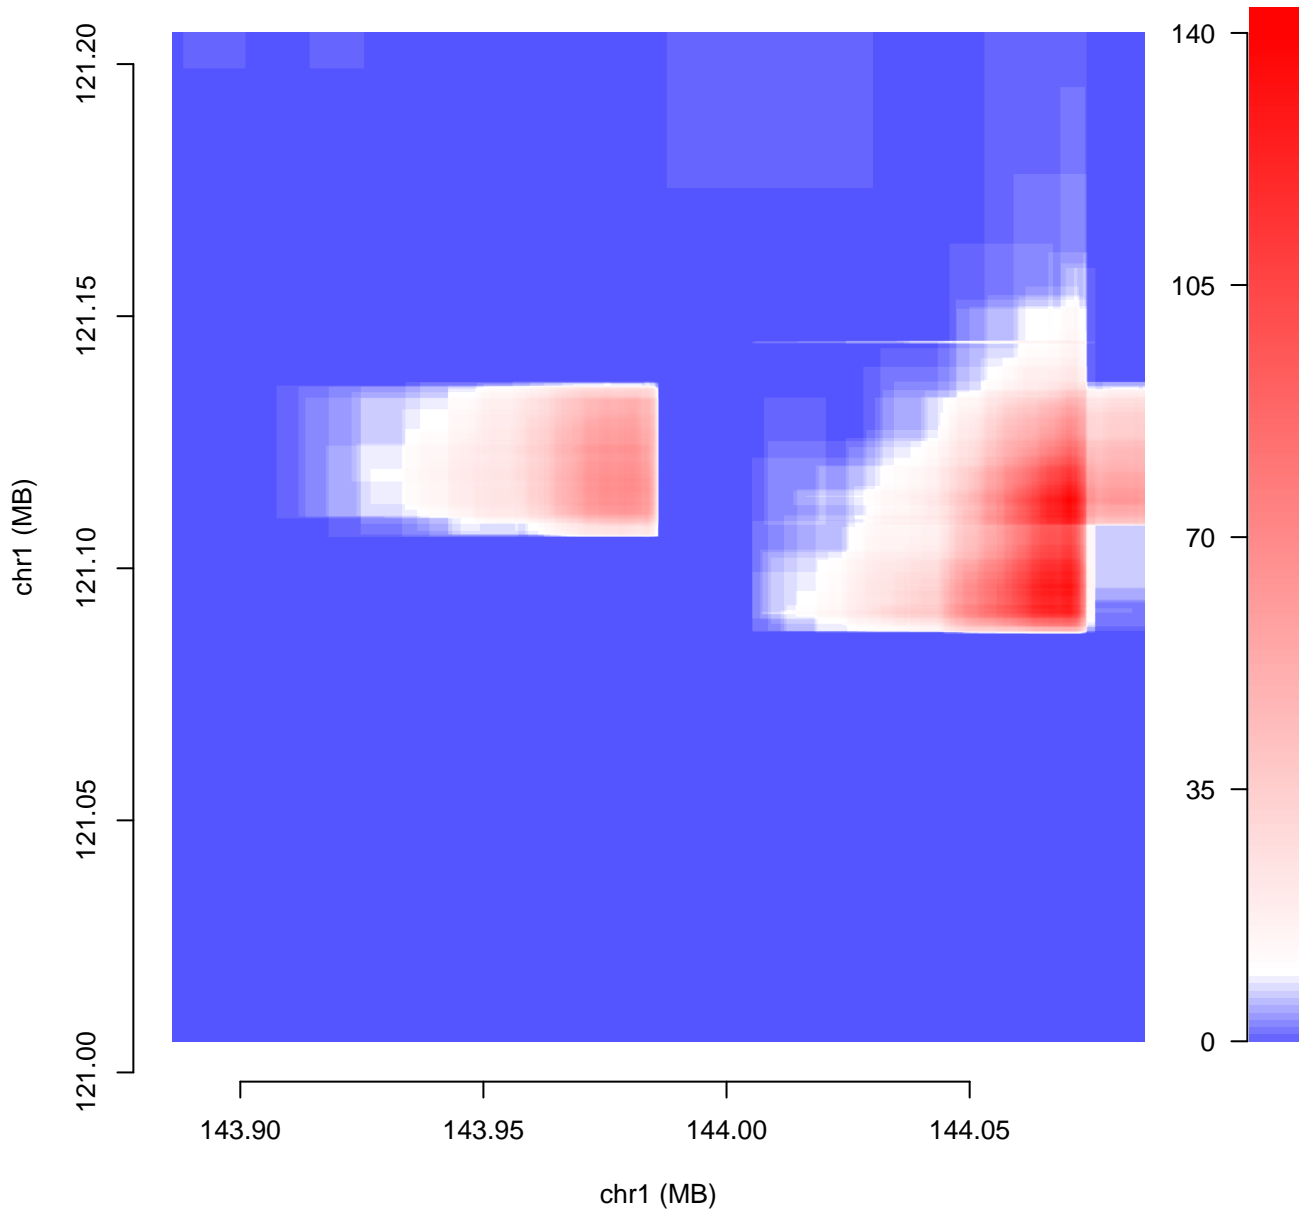

Supplement: Supplemental_Data.zip [file event_522.pdf › event_522.pdf]

Barcode

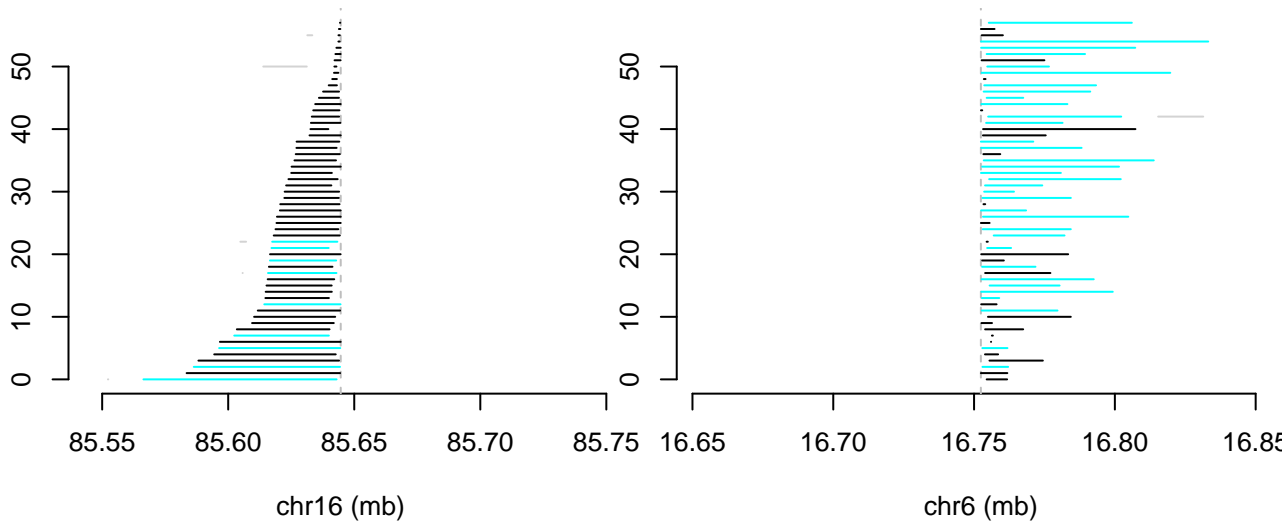

Copy number

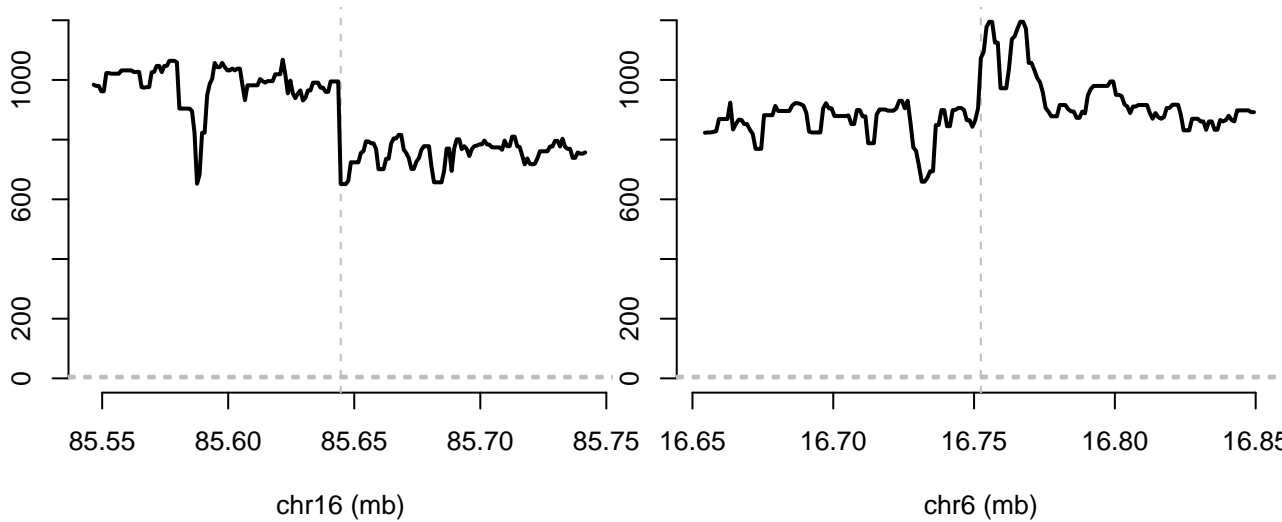

K562 chr16:85,644,641::chr6:16,752,415+-

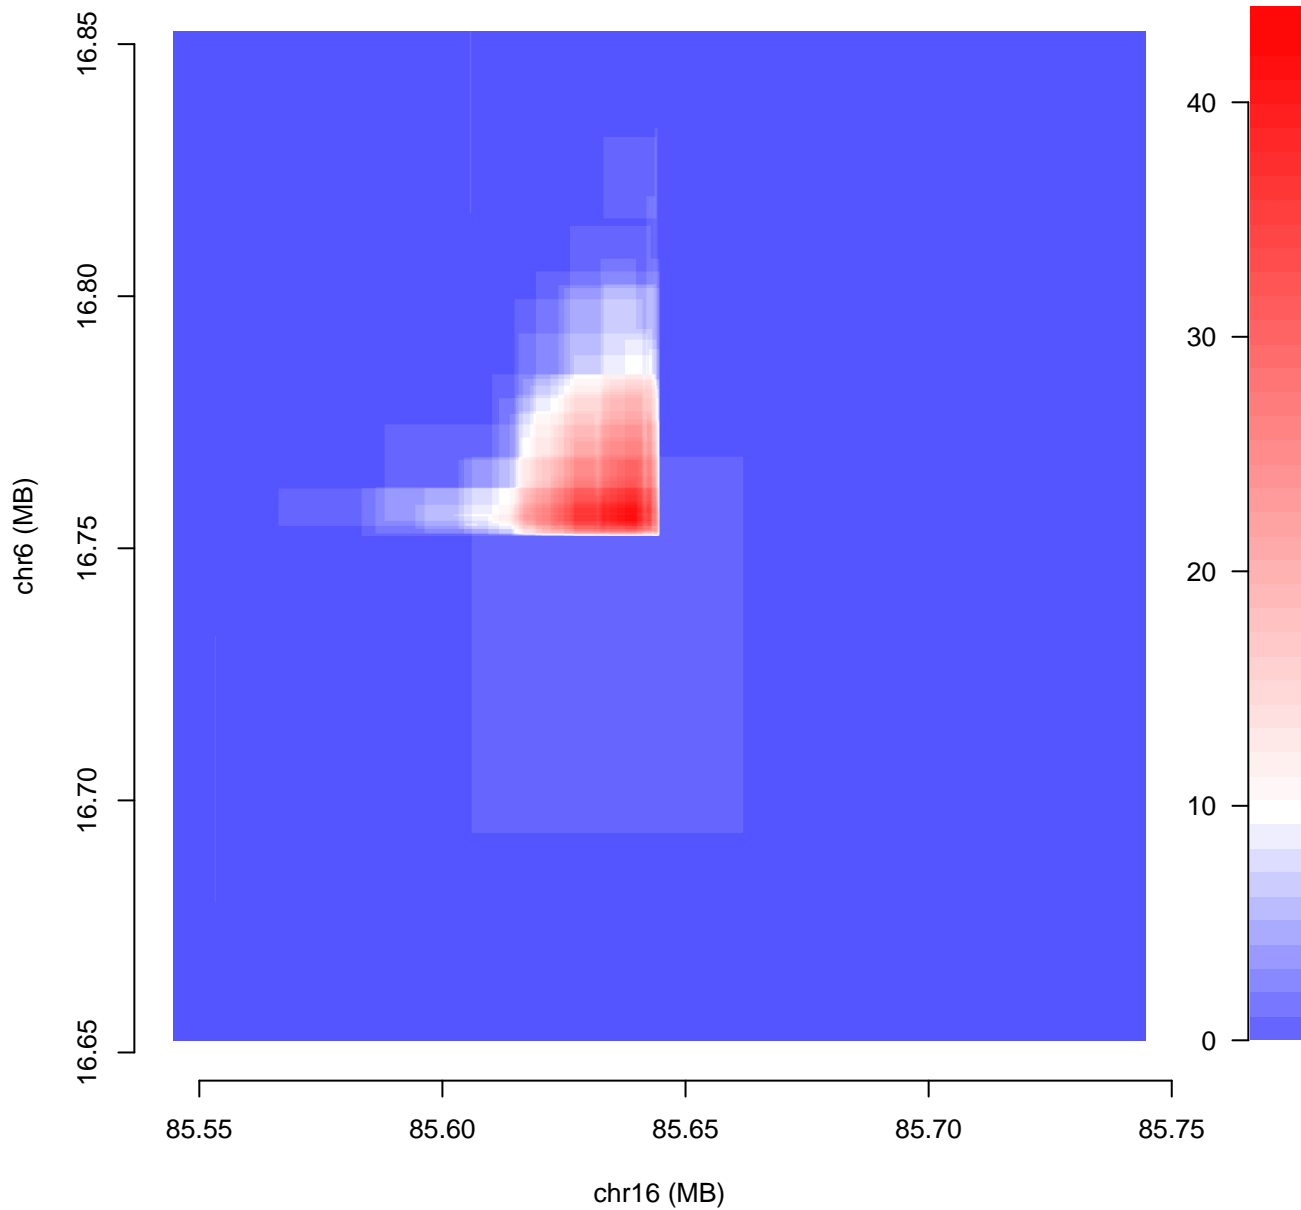

Supplement: Supplemental_Data.zip [file event_523.pdf › event_523.pdf]

Barcode

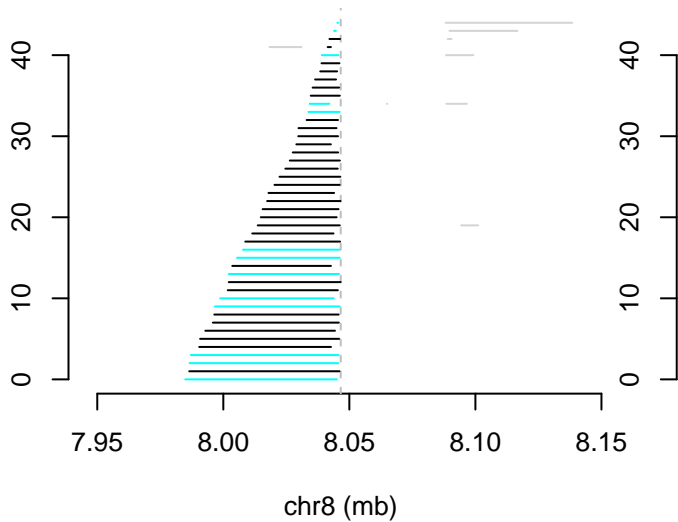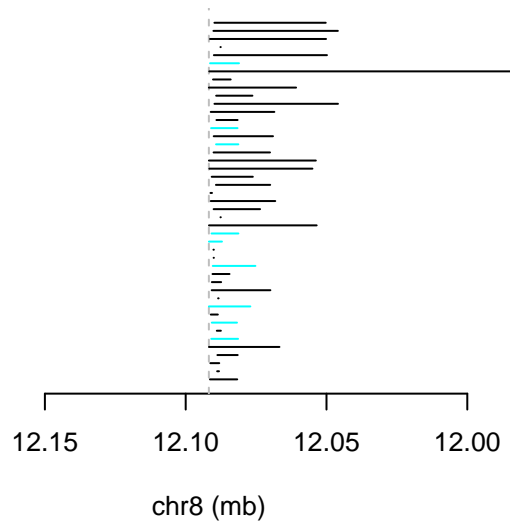

Copy number

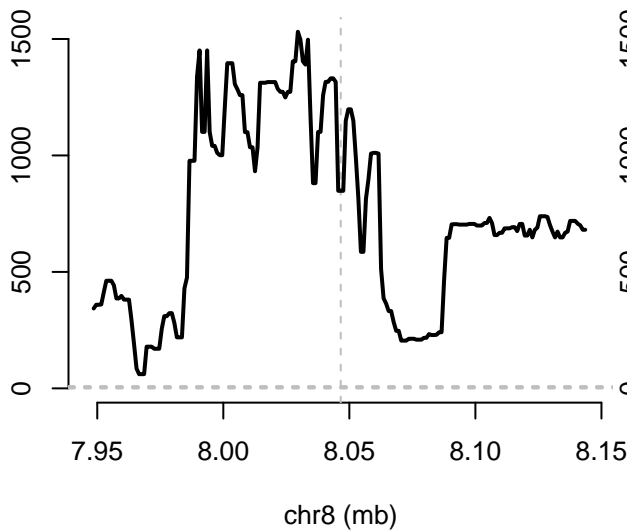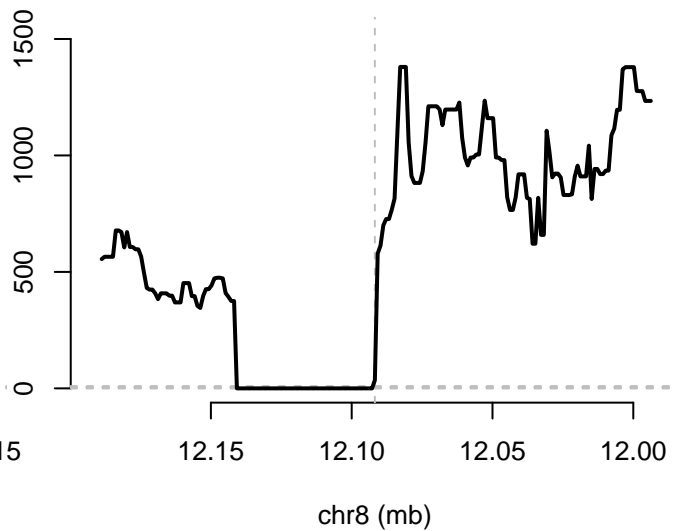

**K562 chr8:12,091,773::chr8:8,046,583++**

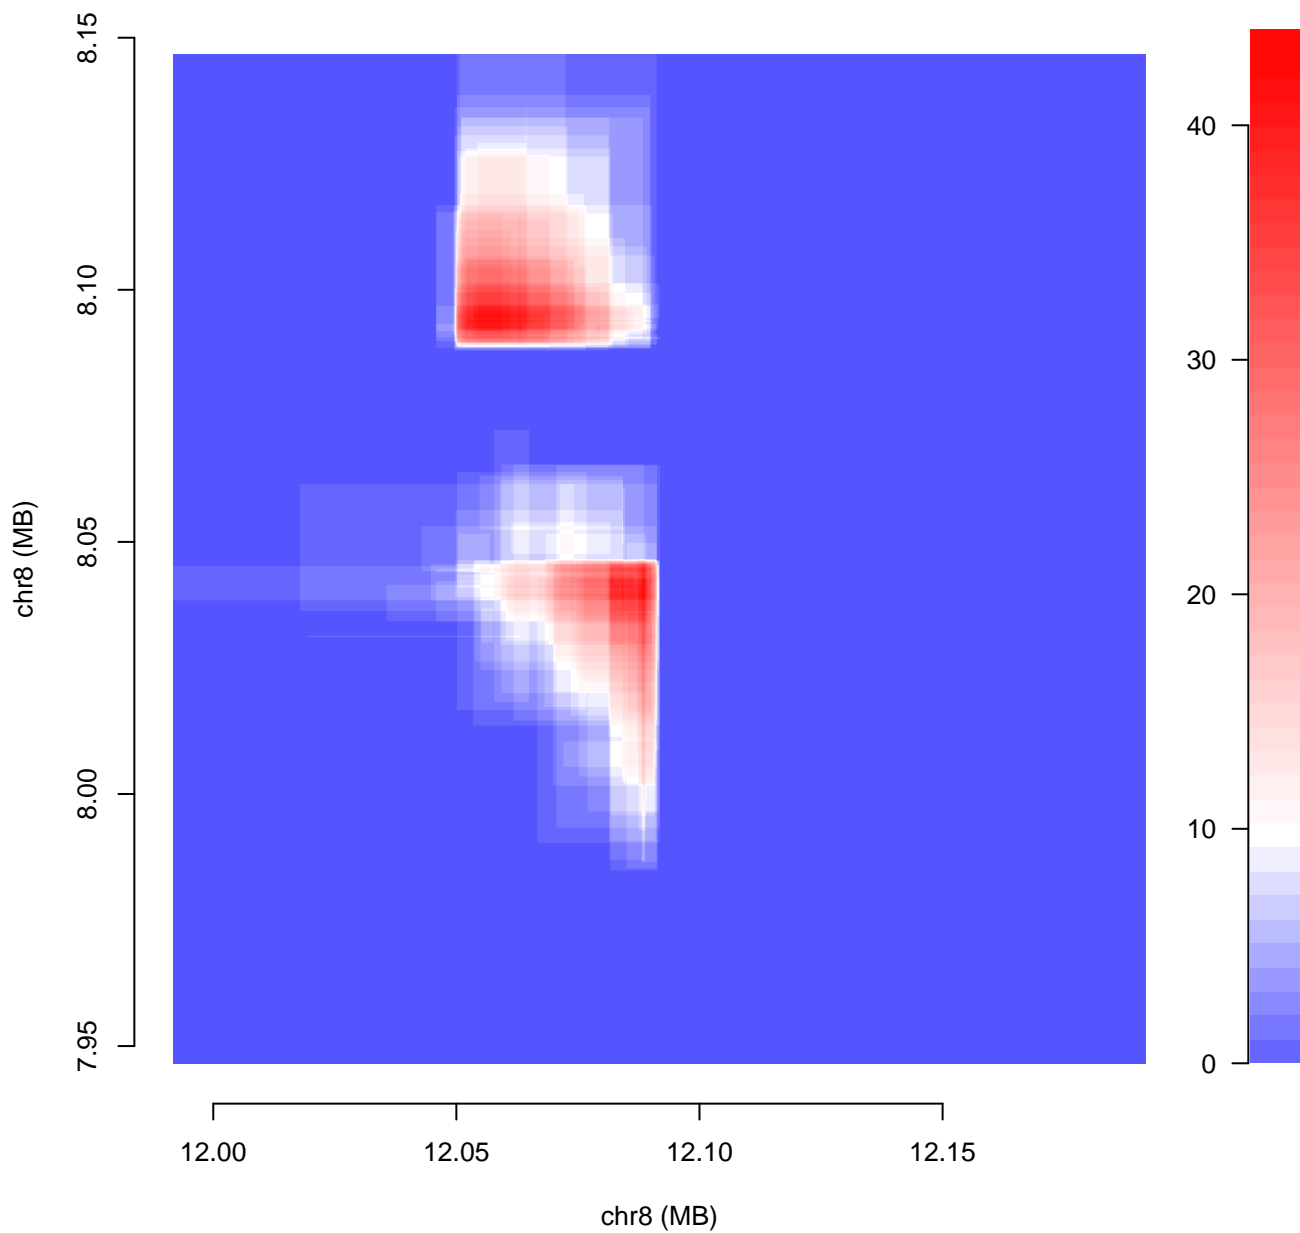

Supplement: Supplemental_Data.zip [file event_524.pdf › event_524.pdf]

Barcode

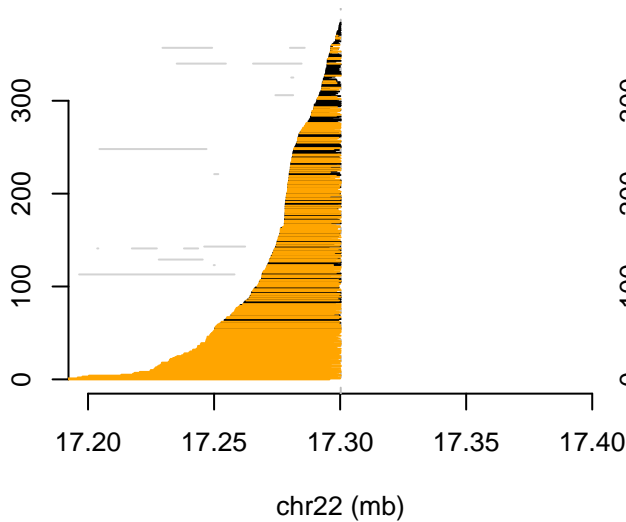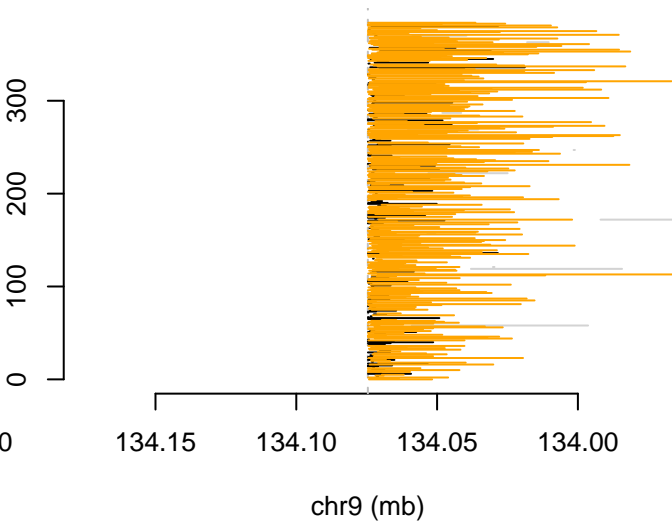

Copy number

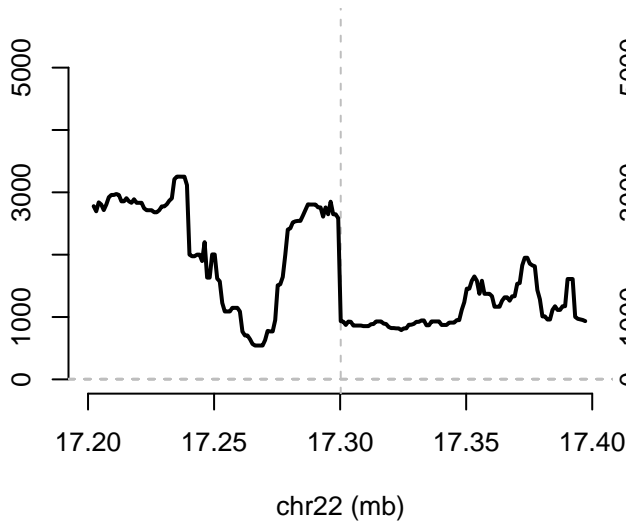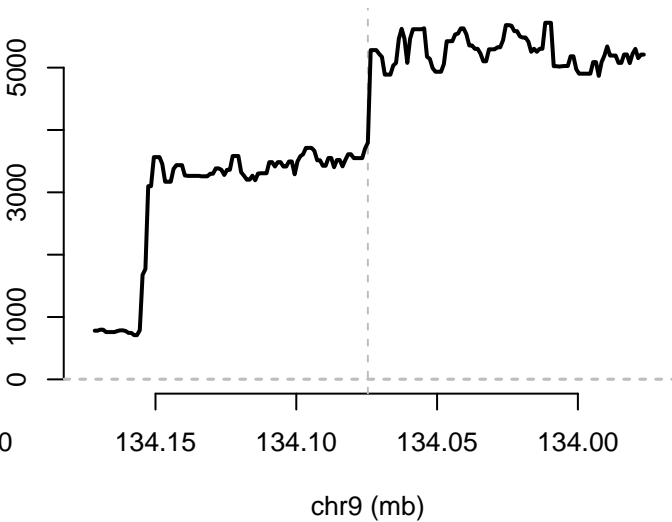

K562 chr22:17,300,239::chr9:134,074,584++

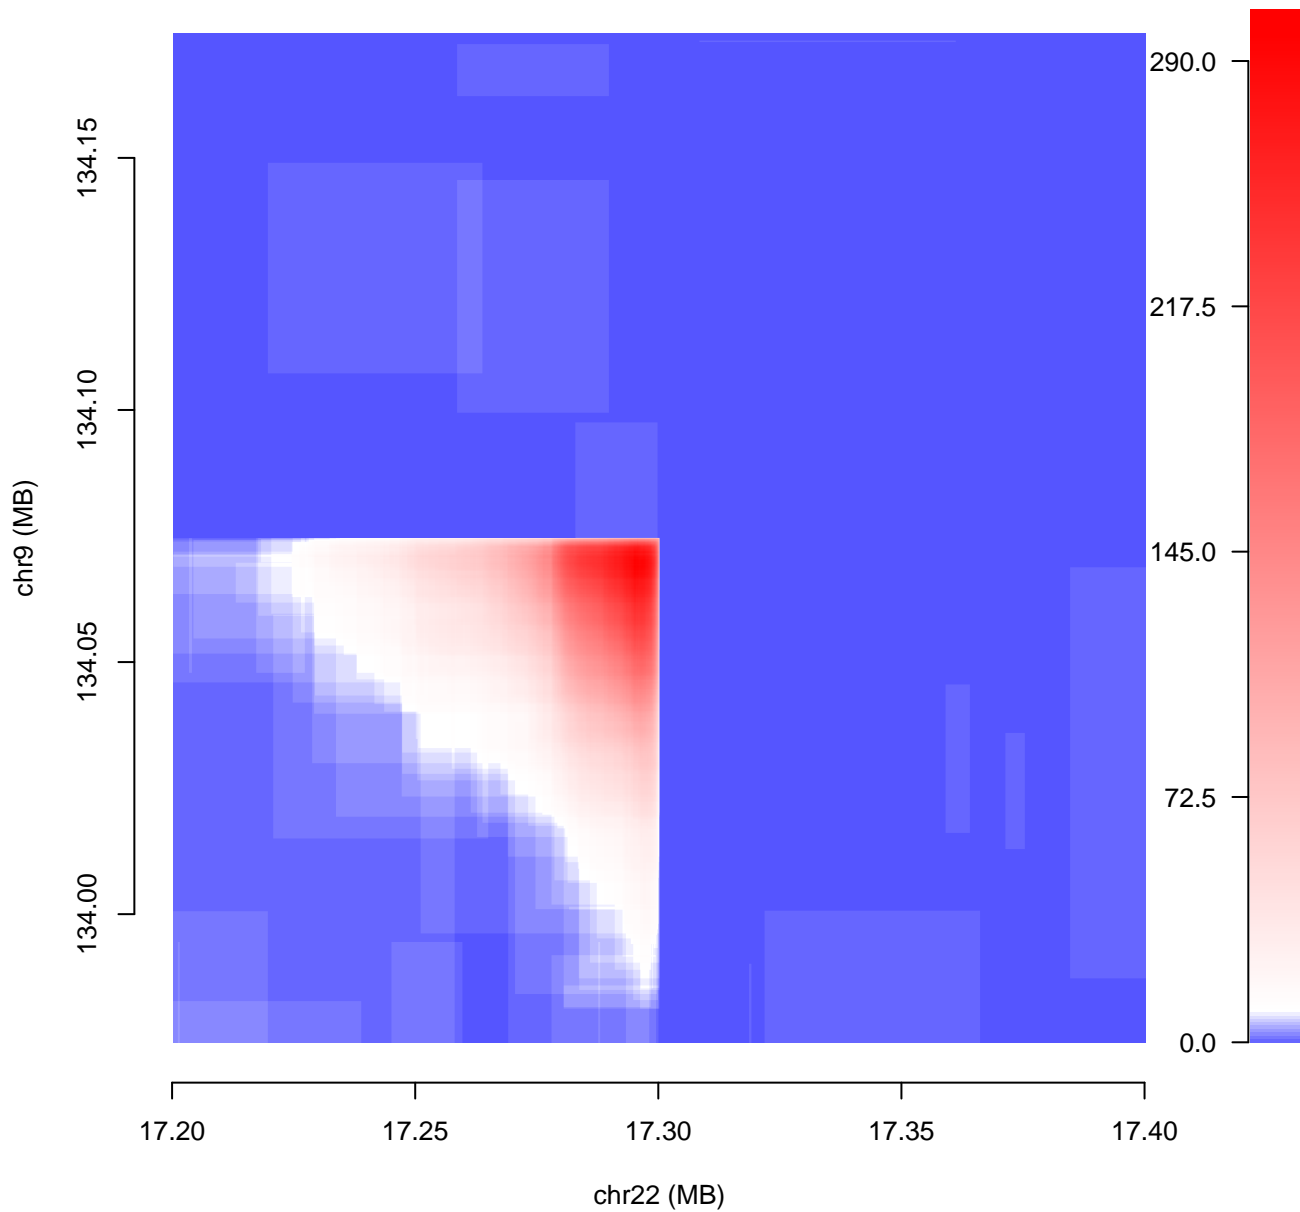

Supplement: Supplemental_Data.zip [file event_525.pdf › event_525.pdf]

Barcode

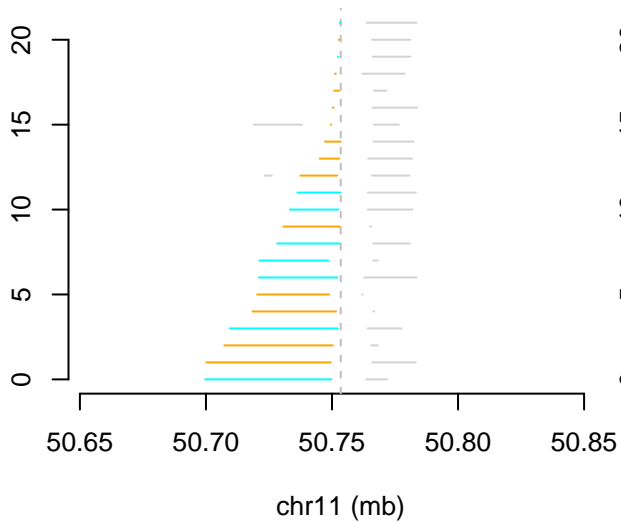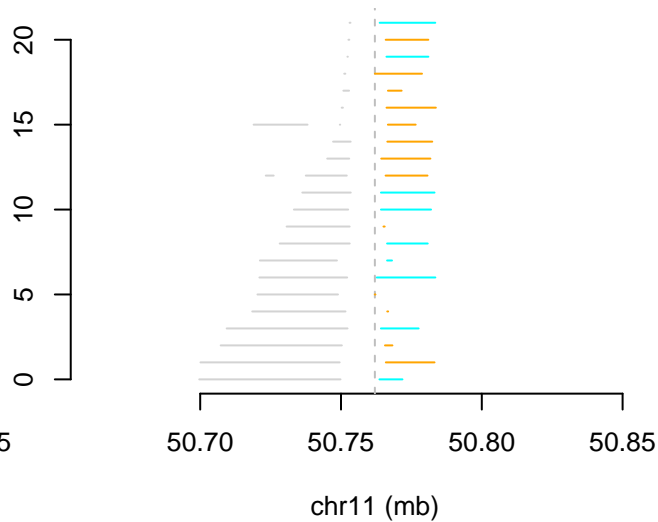

Copy number

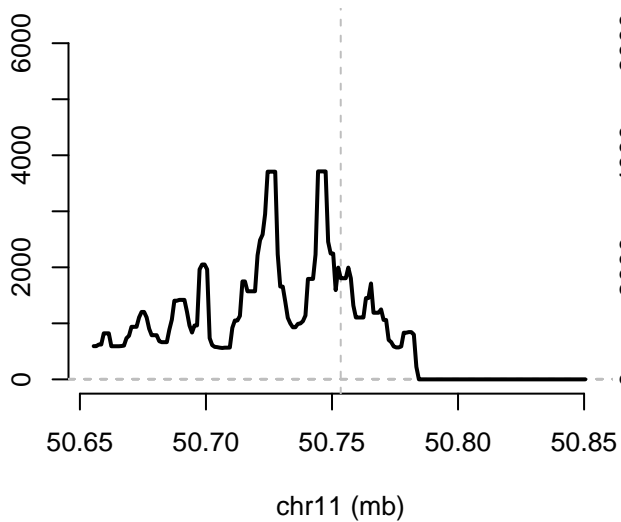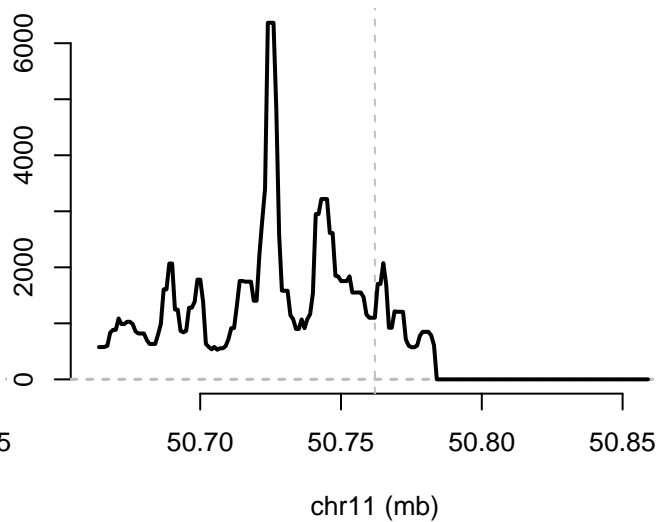

K562 chr11:50,762,033::chr11:50,753,466-+

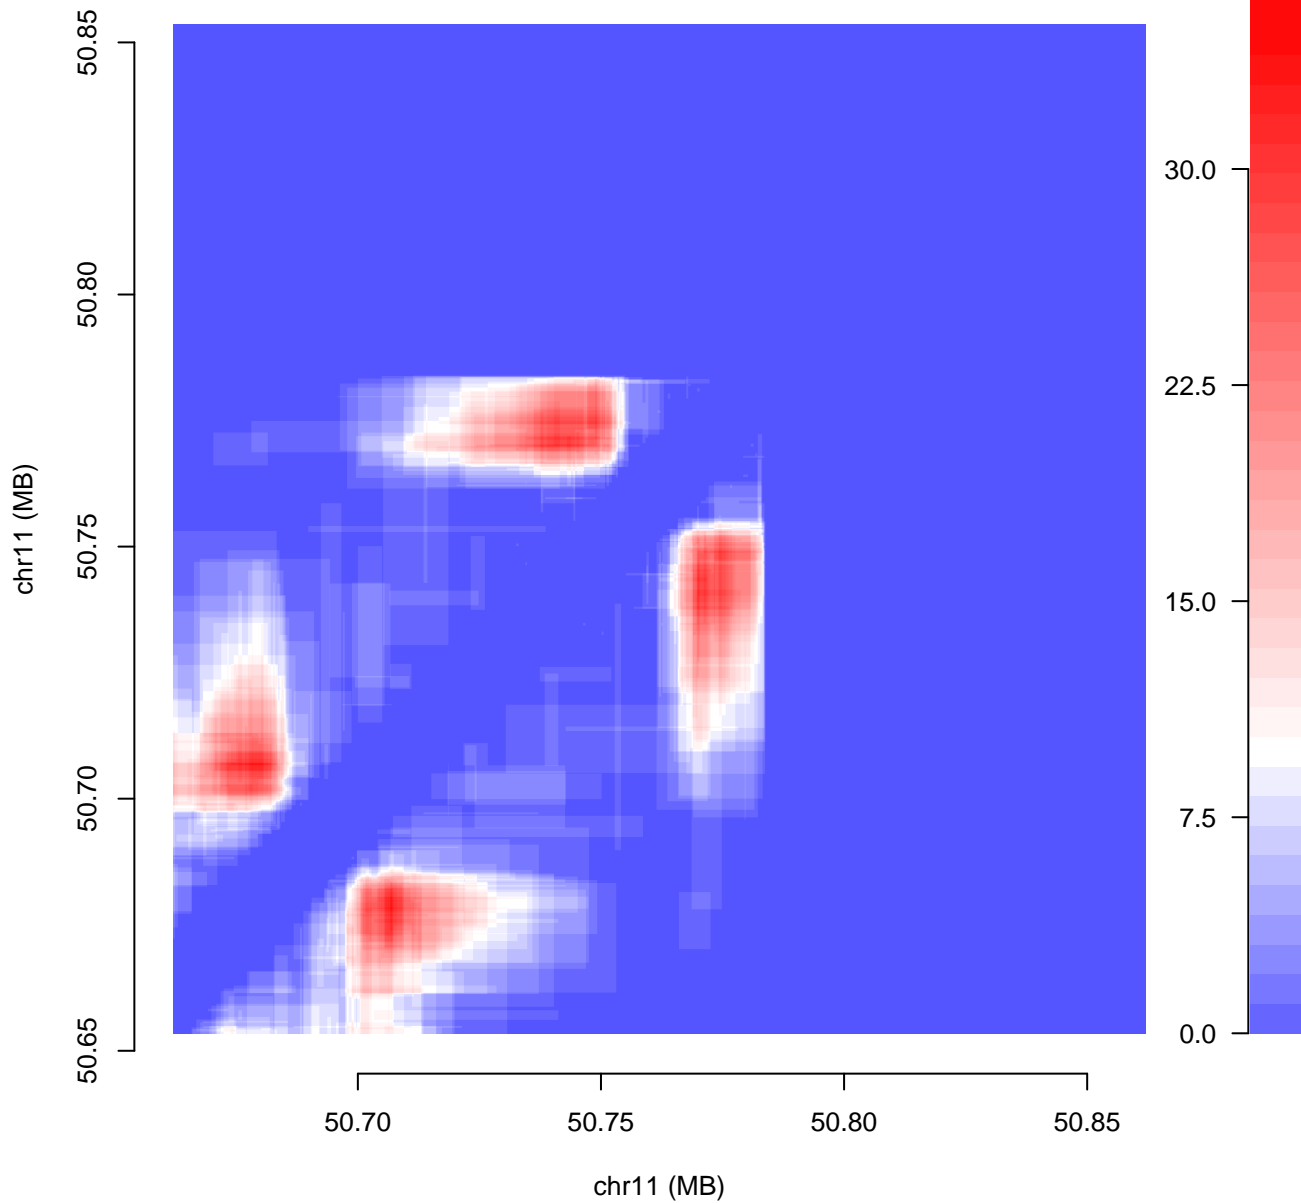

Supplement: Supplemental_Data.zip [file event_526.pdf › event_526.pdf]

Barcode

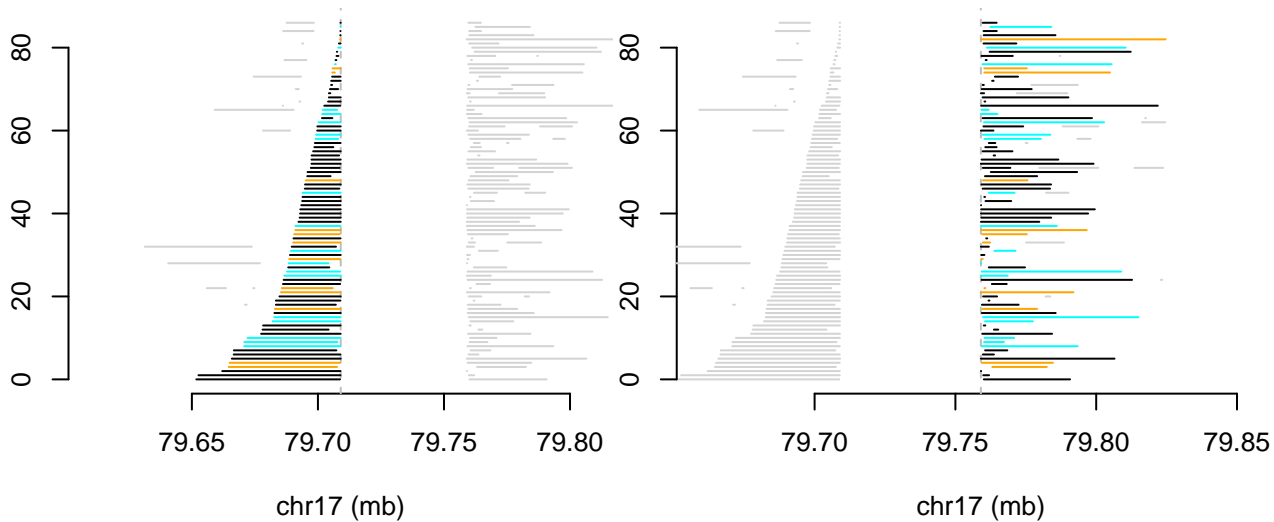

Copy number

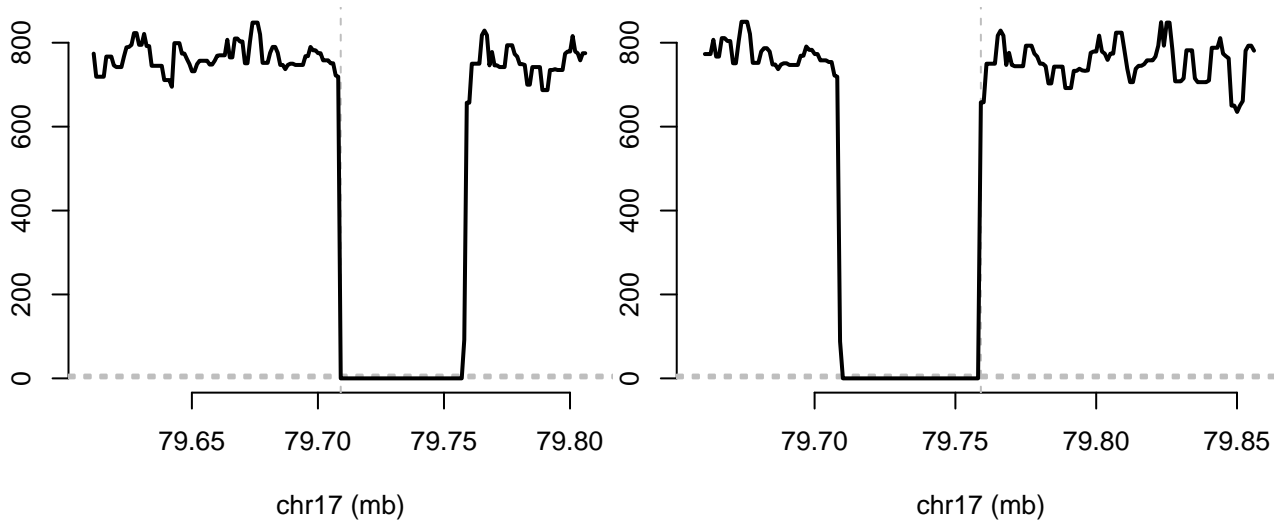

K562 chr17:79,759,048::chr17:79,709,050-+

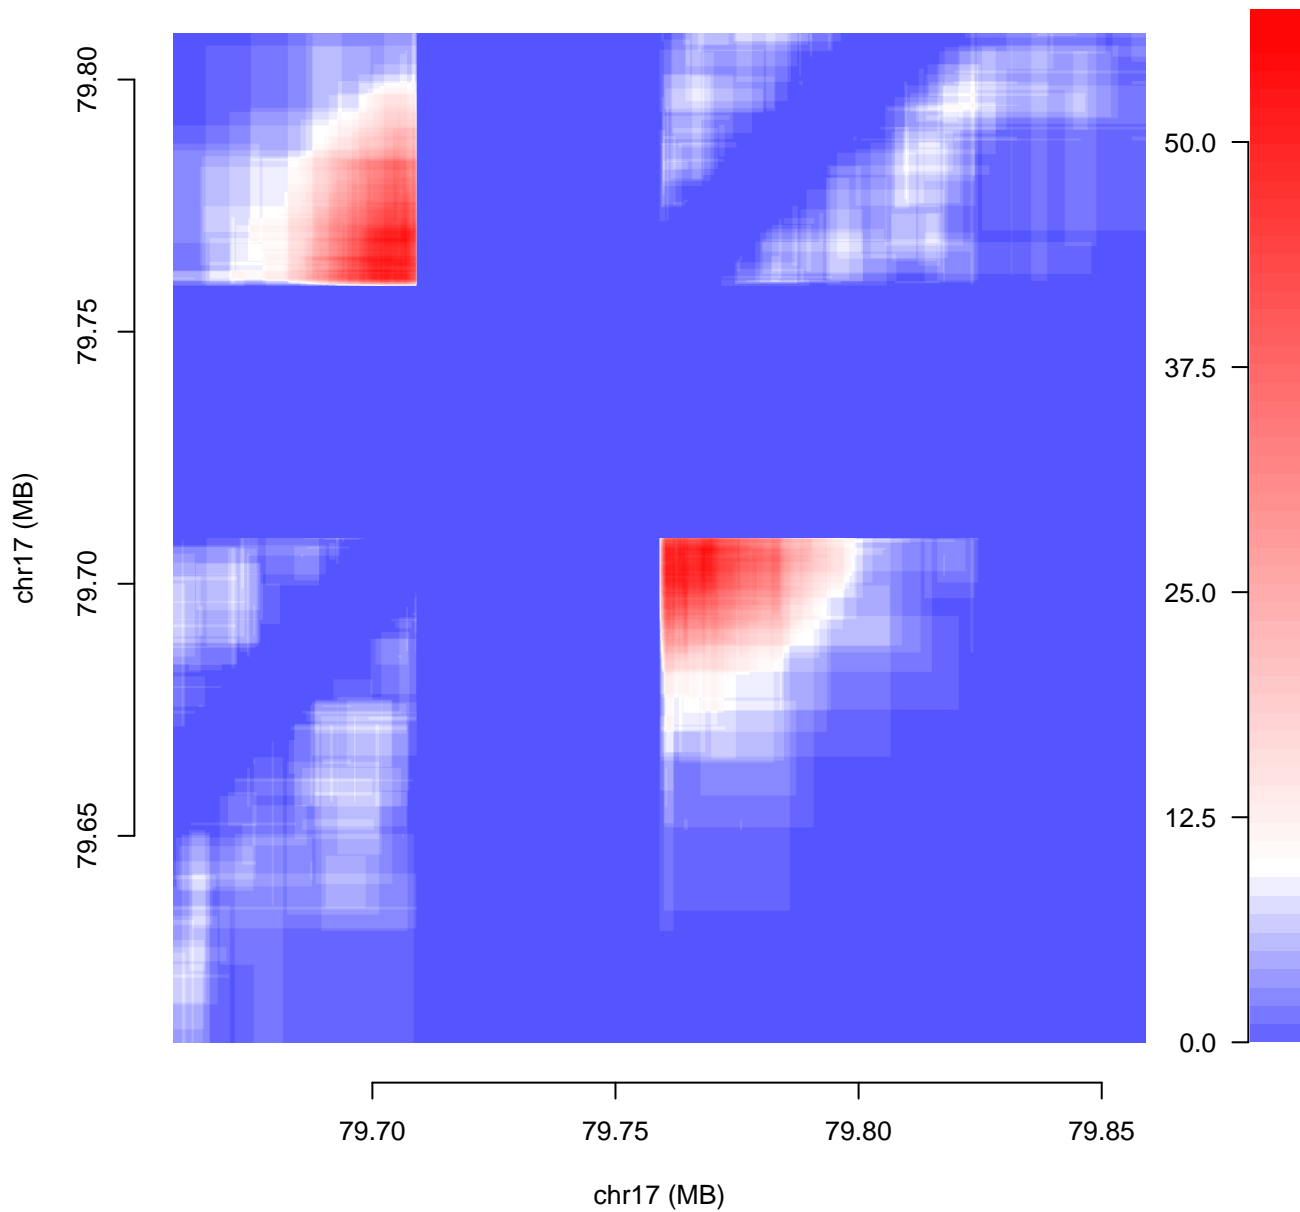

Supplement: Supplemental_Data.zip [file event_527.pdf › event_527.pdf]

Barcode

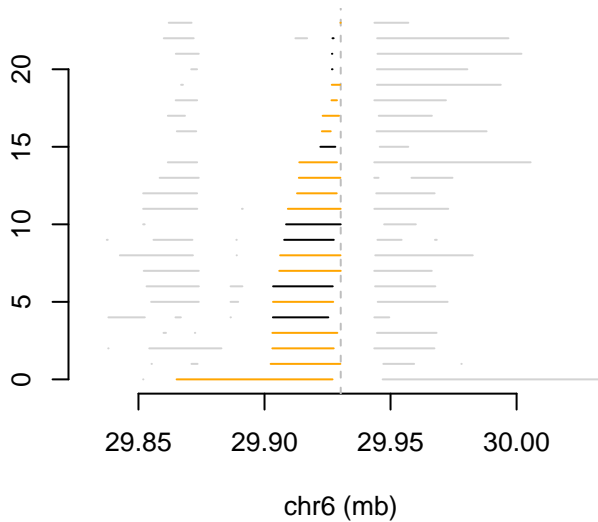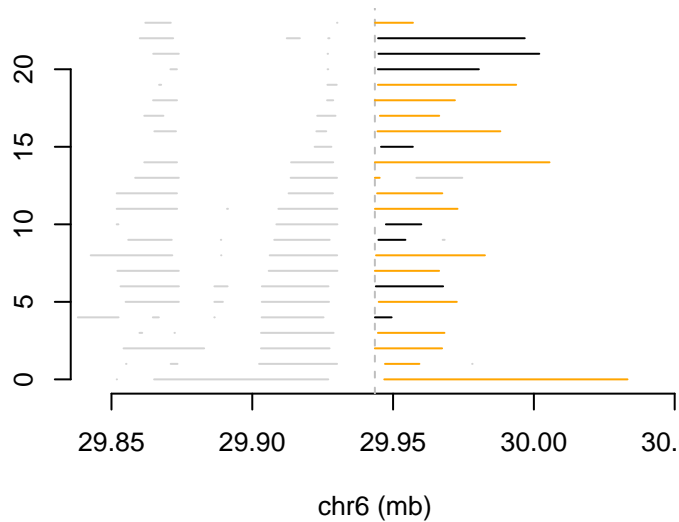

Copy number

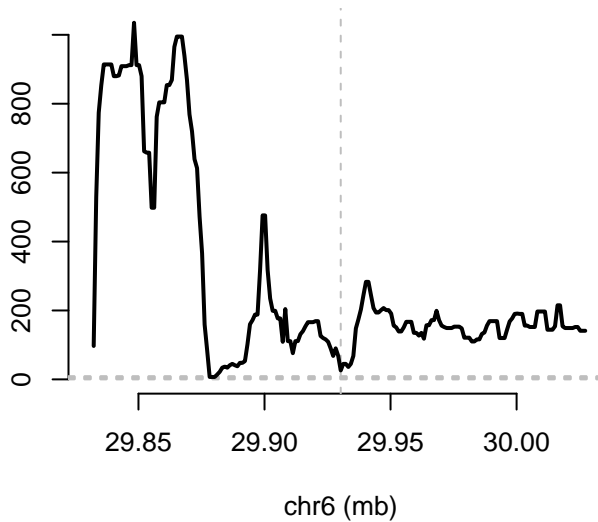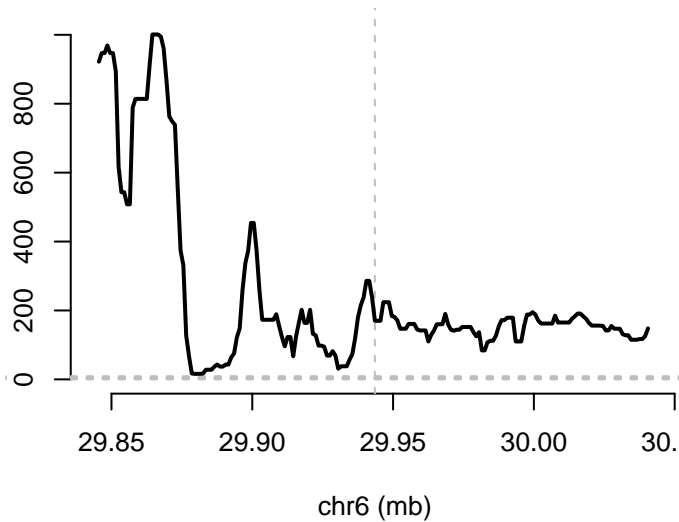

**K562 chr6:29,943,537::chr6:29,930,241-+**

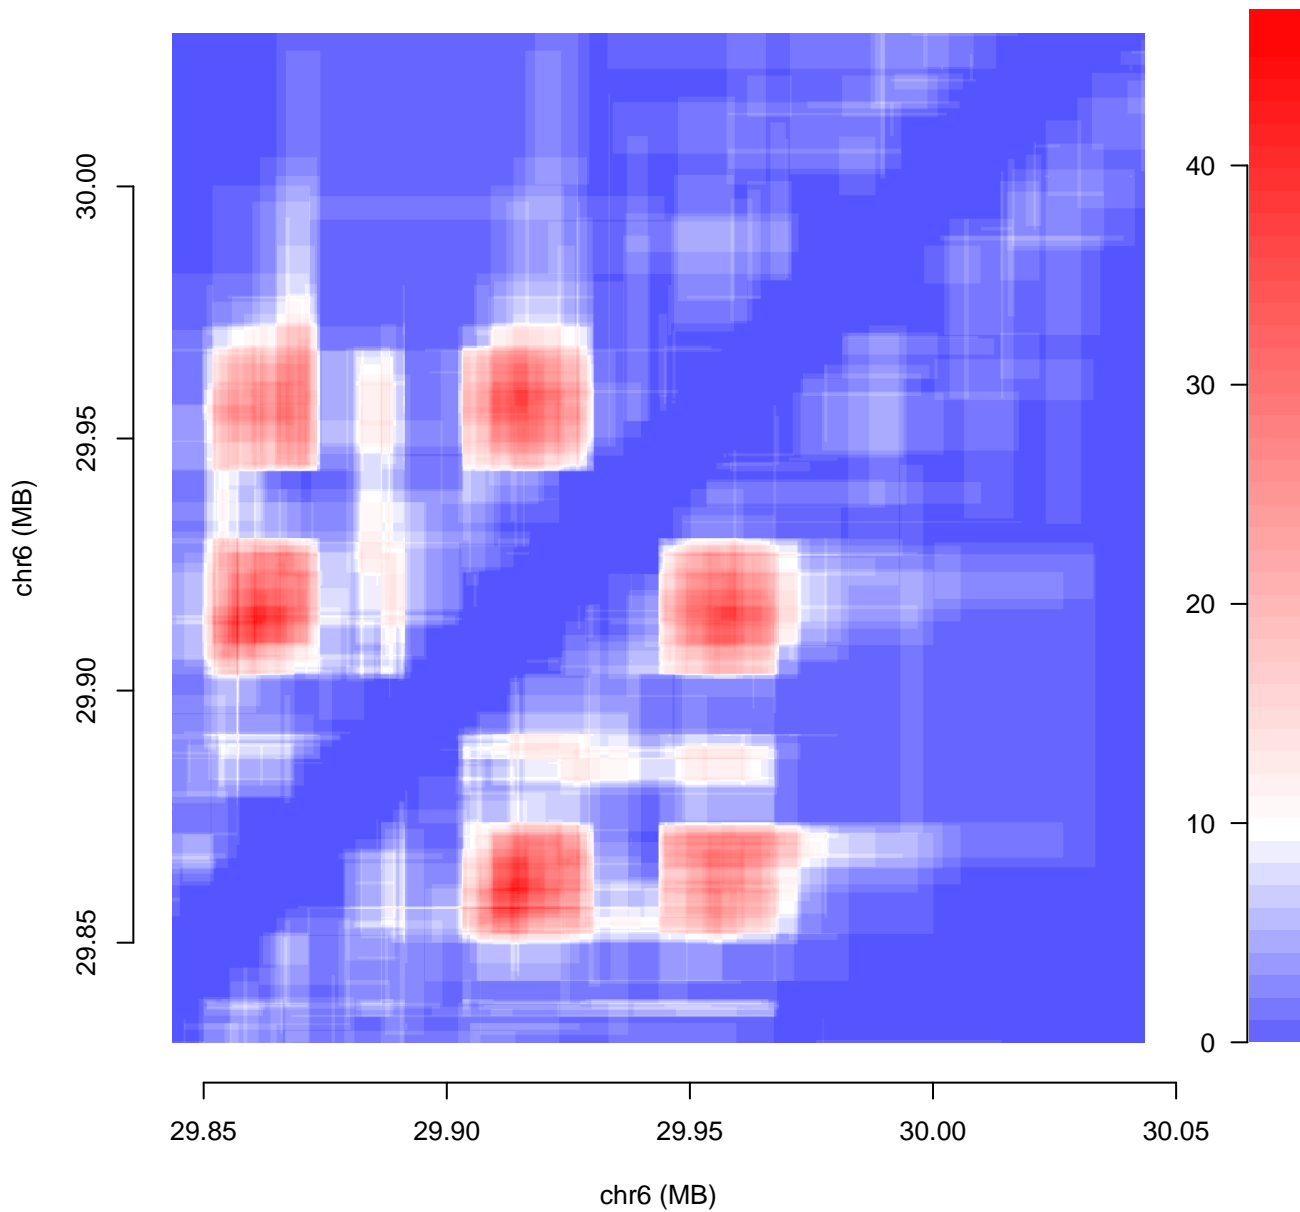

Supplement: Supplemental_Data.zip [file event_528.pdf › event_528.pdf]

Barcode

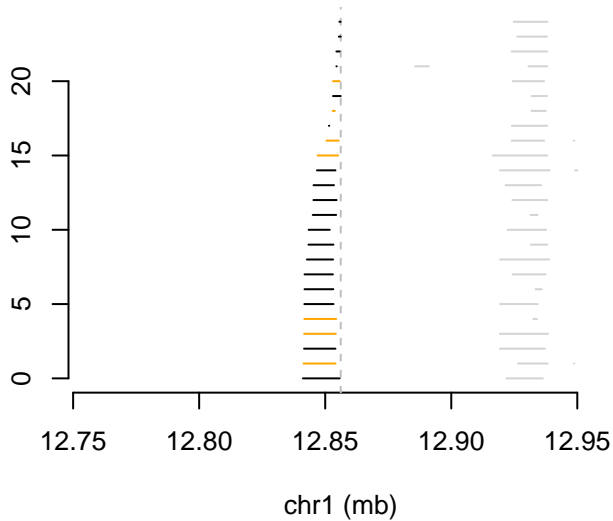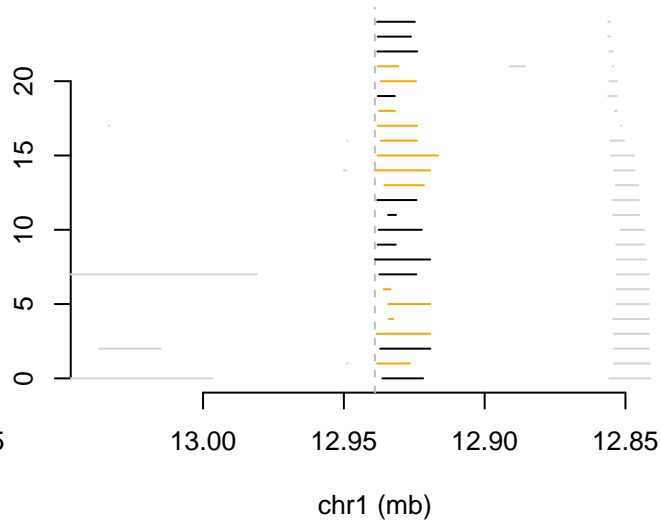

Copy number

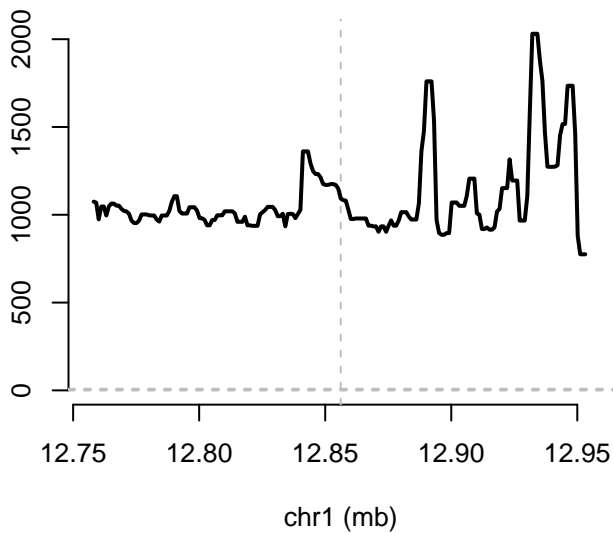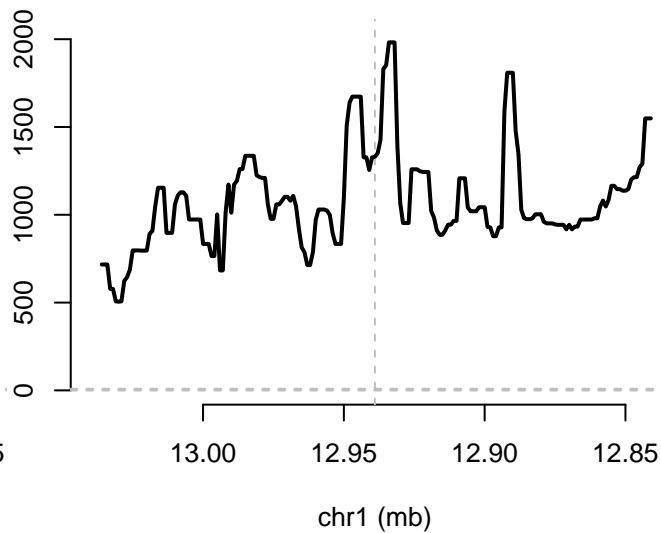

K562 chr1:12,938,988::chr1:12,856,160++

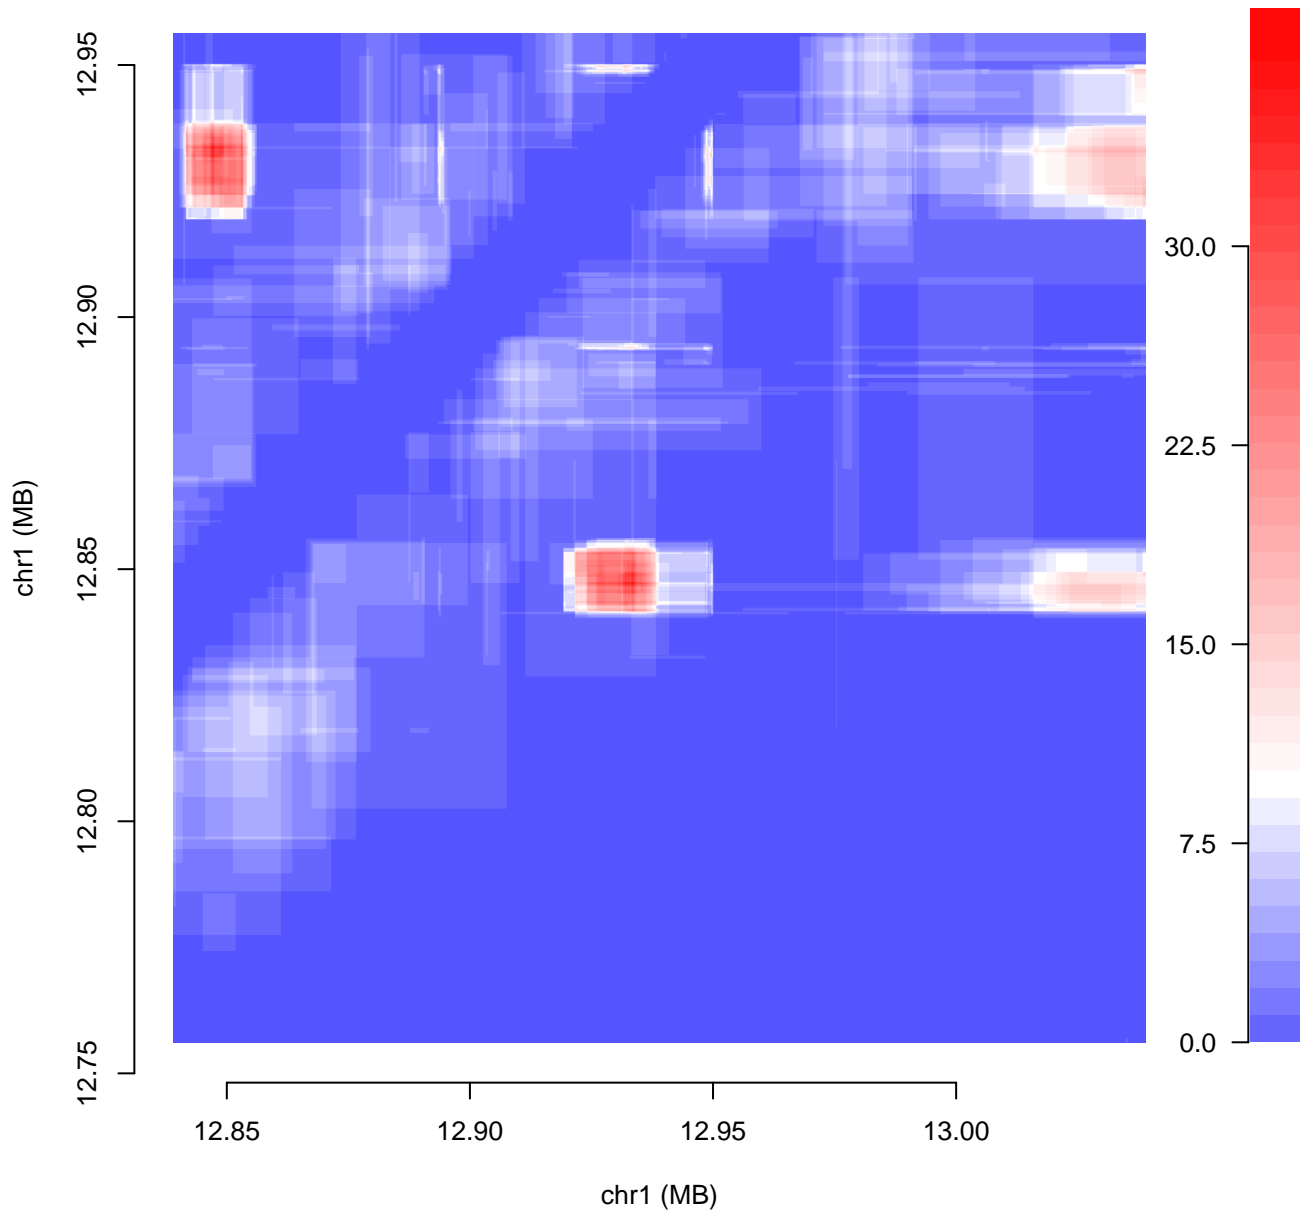

Supplement: Supplemental_Data.zip [file event_529.pdf › event_529.pdf]

Barcode

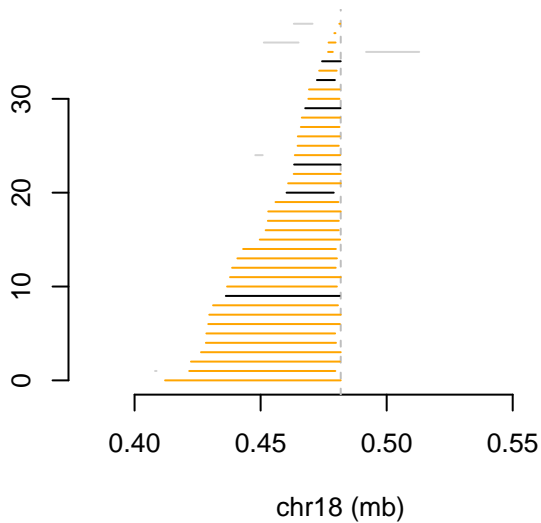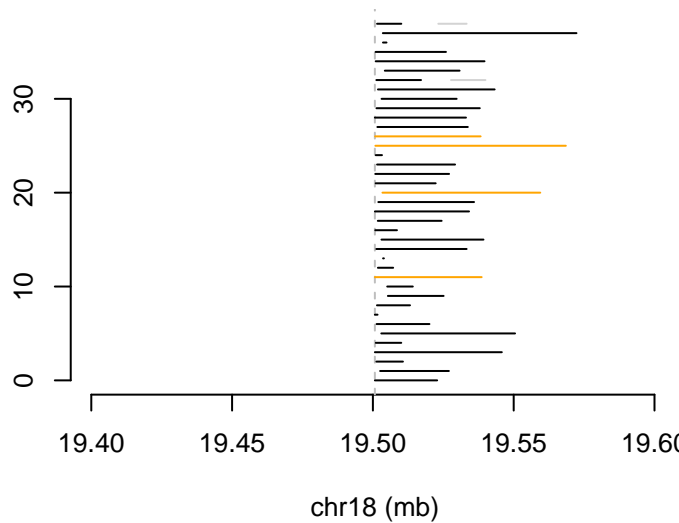

Copy number

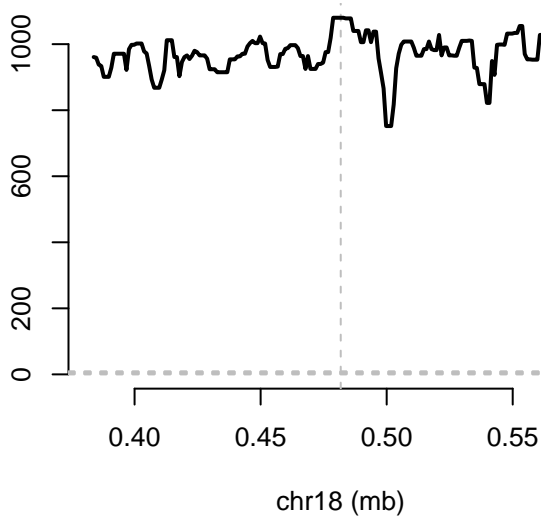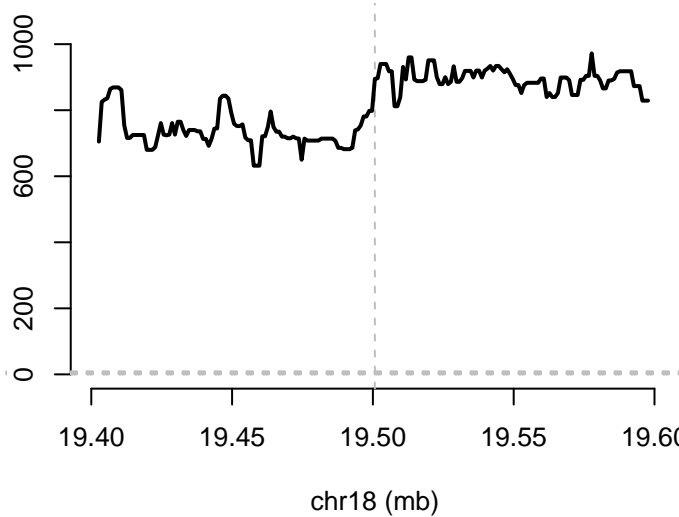

**K562 chr18:481,781::chr18:19,500,698+-**

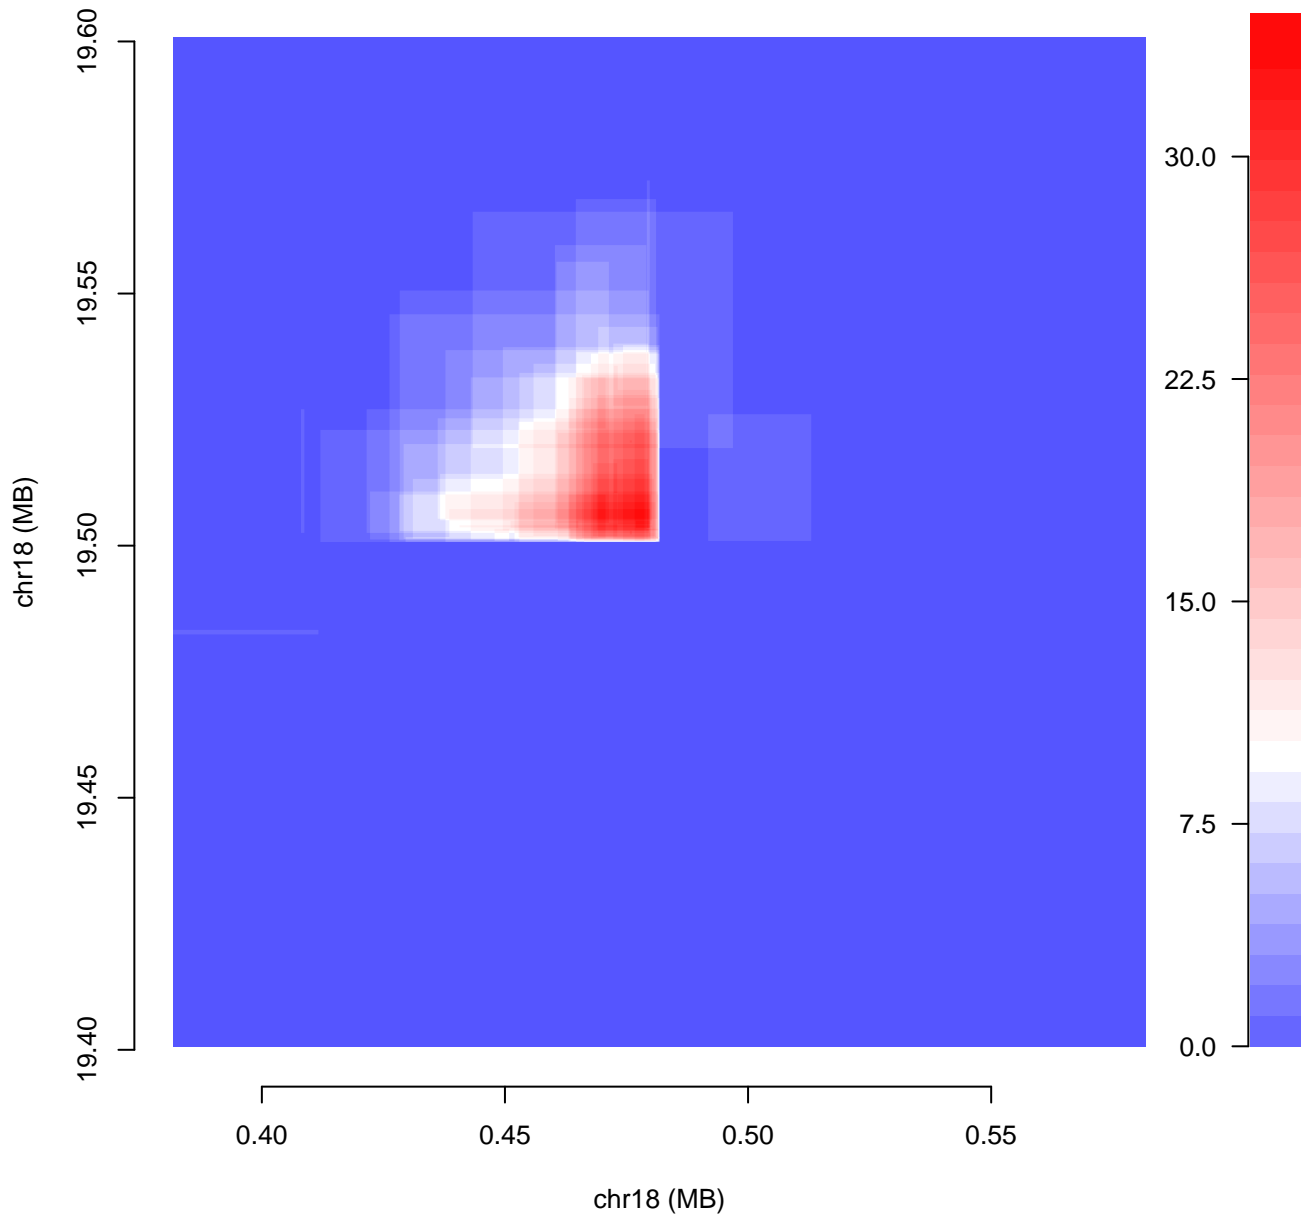

Supplement: Supplemental_Data.zip [file event_53.pdf › event_53.pdf]

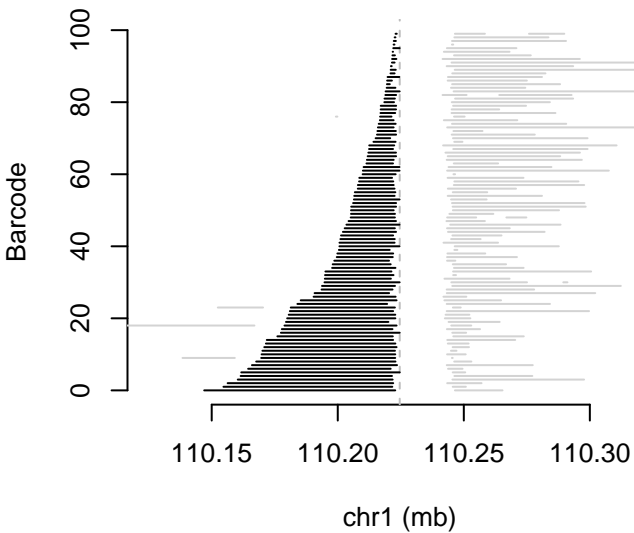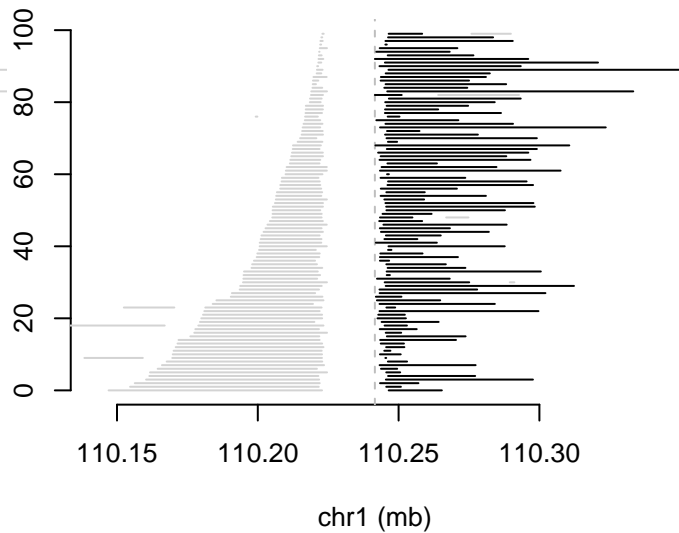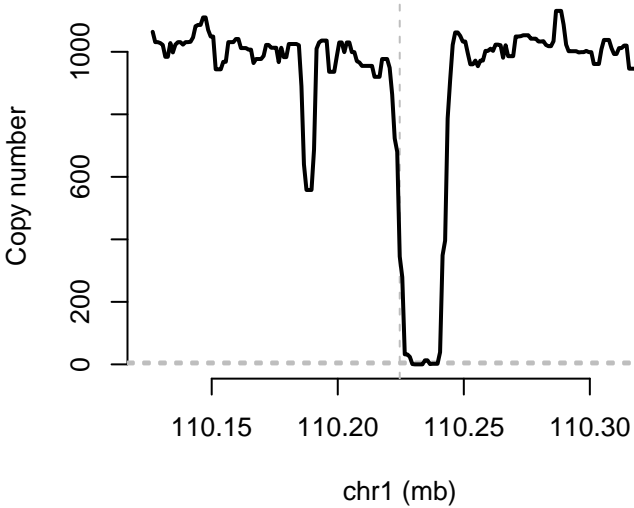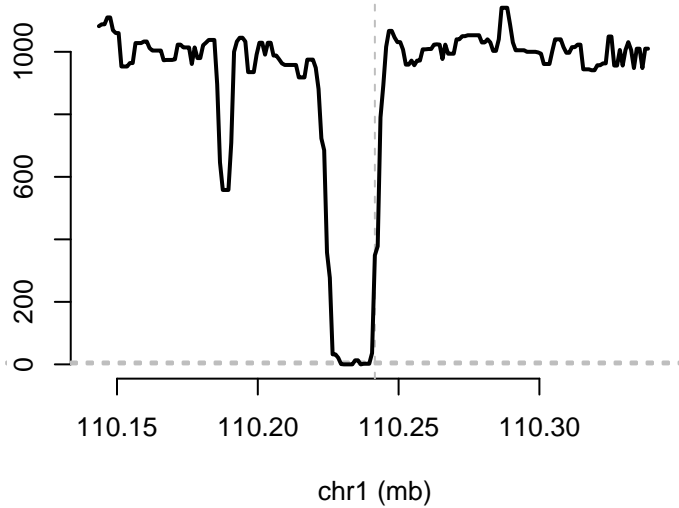

K562 chr1:110,241,573::chr1:110,224,589-+

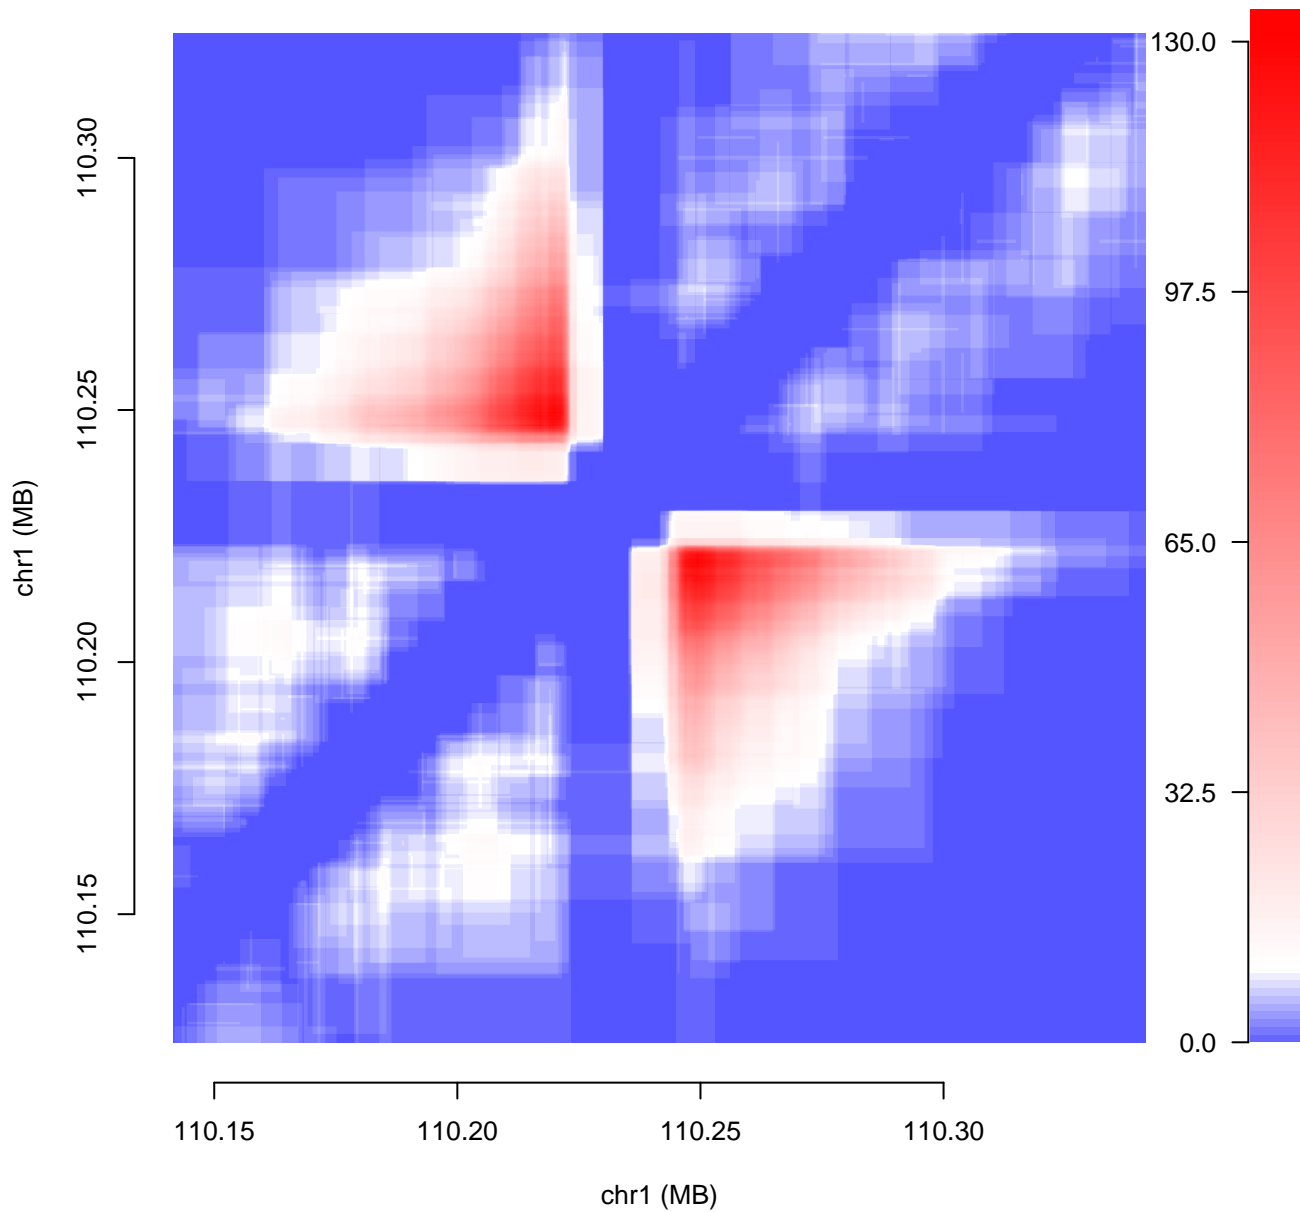

Supplement: Supplemental_Data.zip [file event_530.pdf › event_530.pdf]

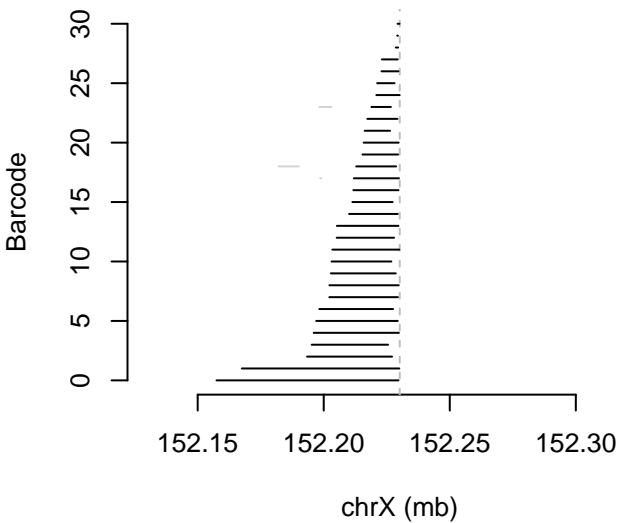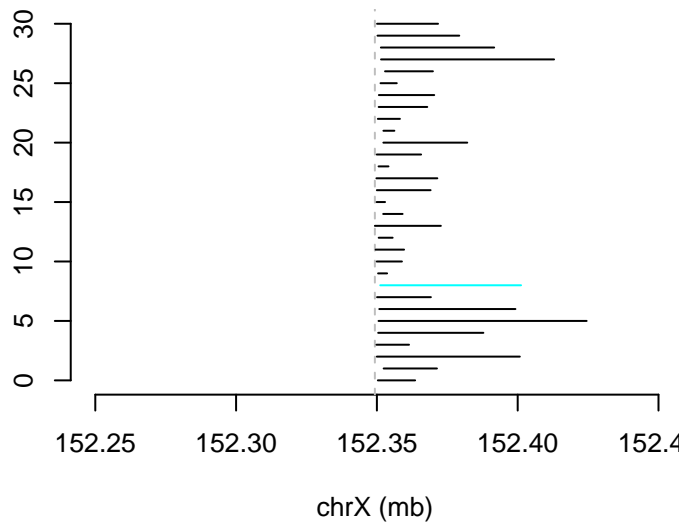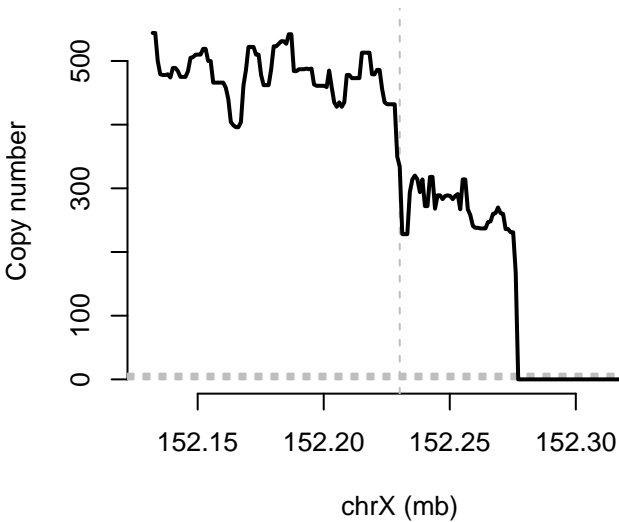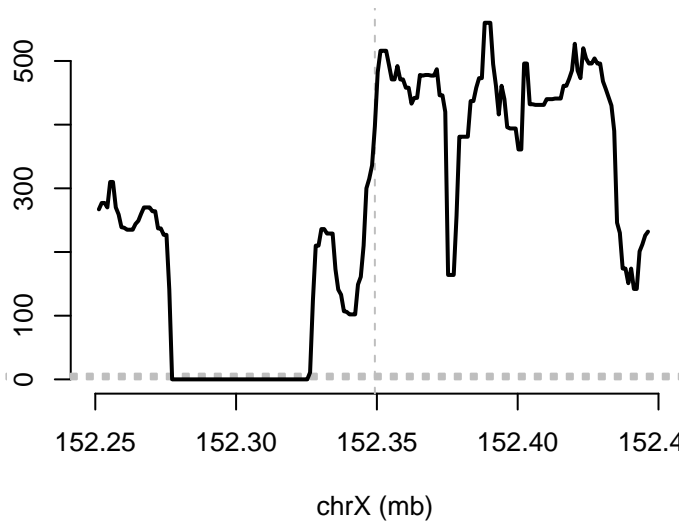

K562 chrX:152,349,279::chrX:152,230,157-+

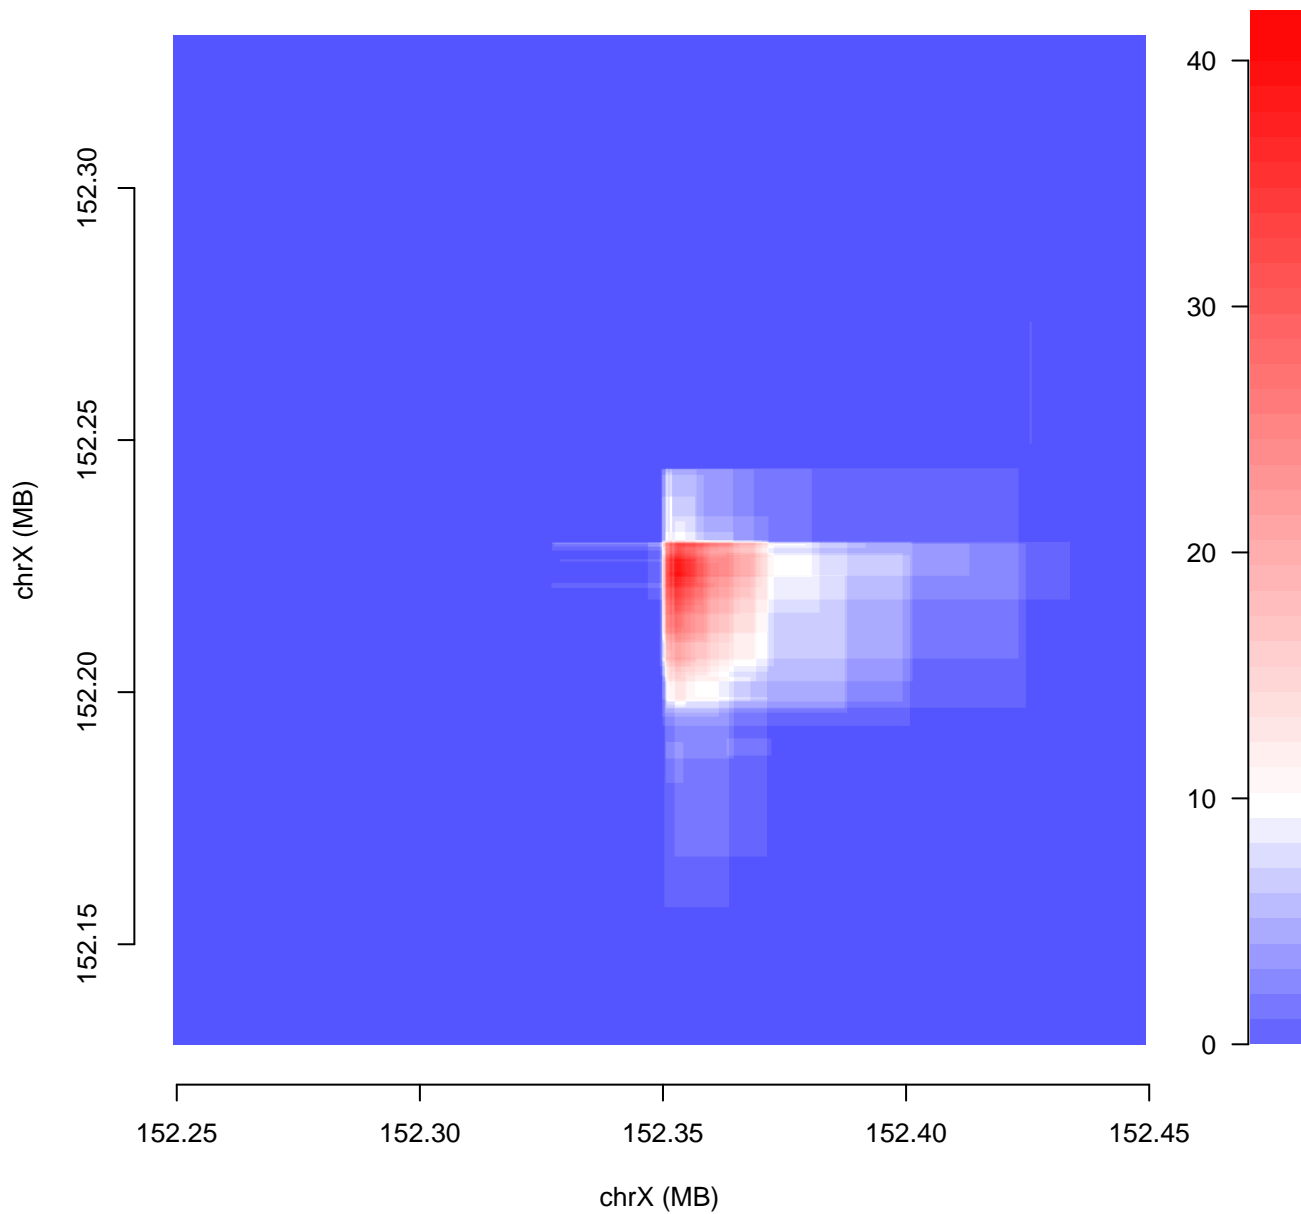

Supplement: Supplemental_Data.zip [file event_531.pdf › event_531.pdf]

Barcode

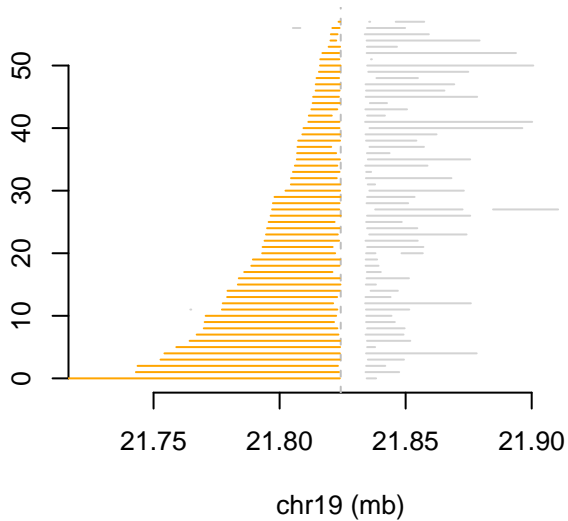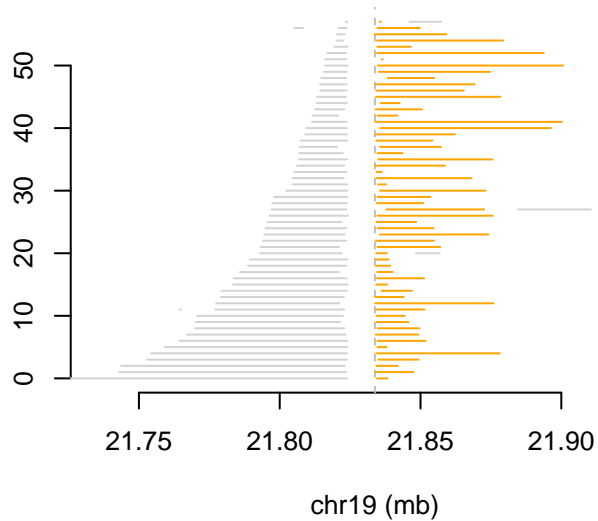

Copy number

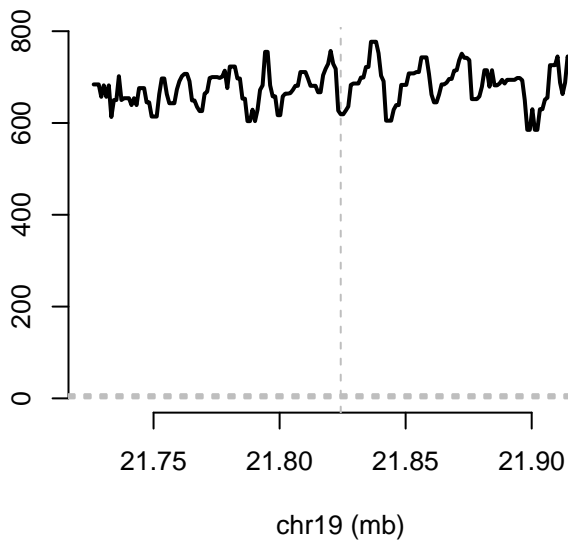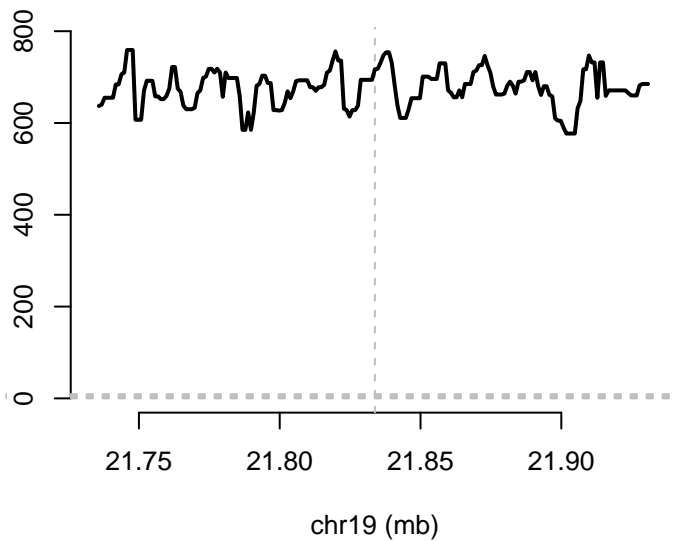

K562 chr19:21,824,253::chr19:21,833,786+-

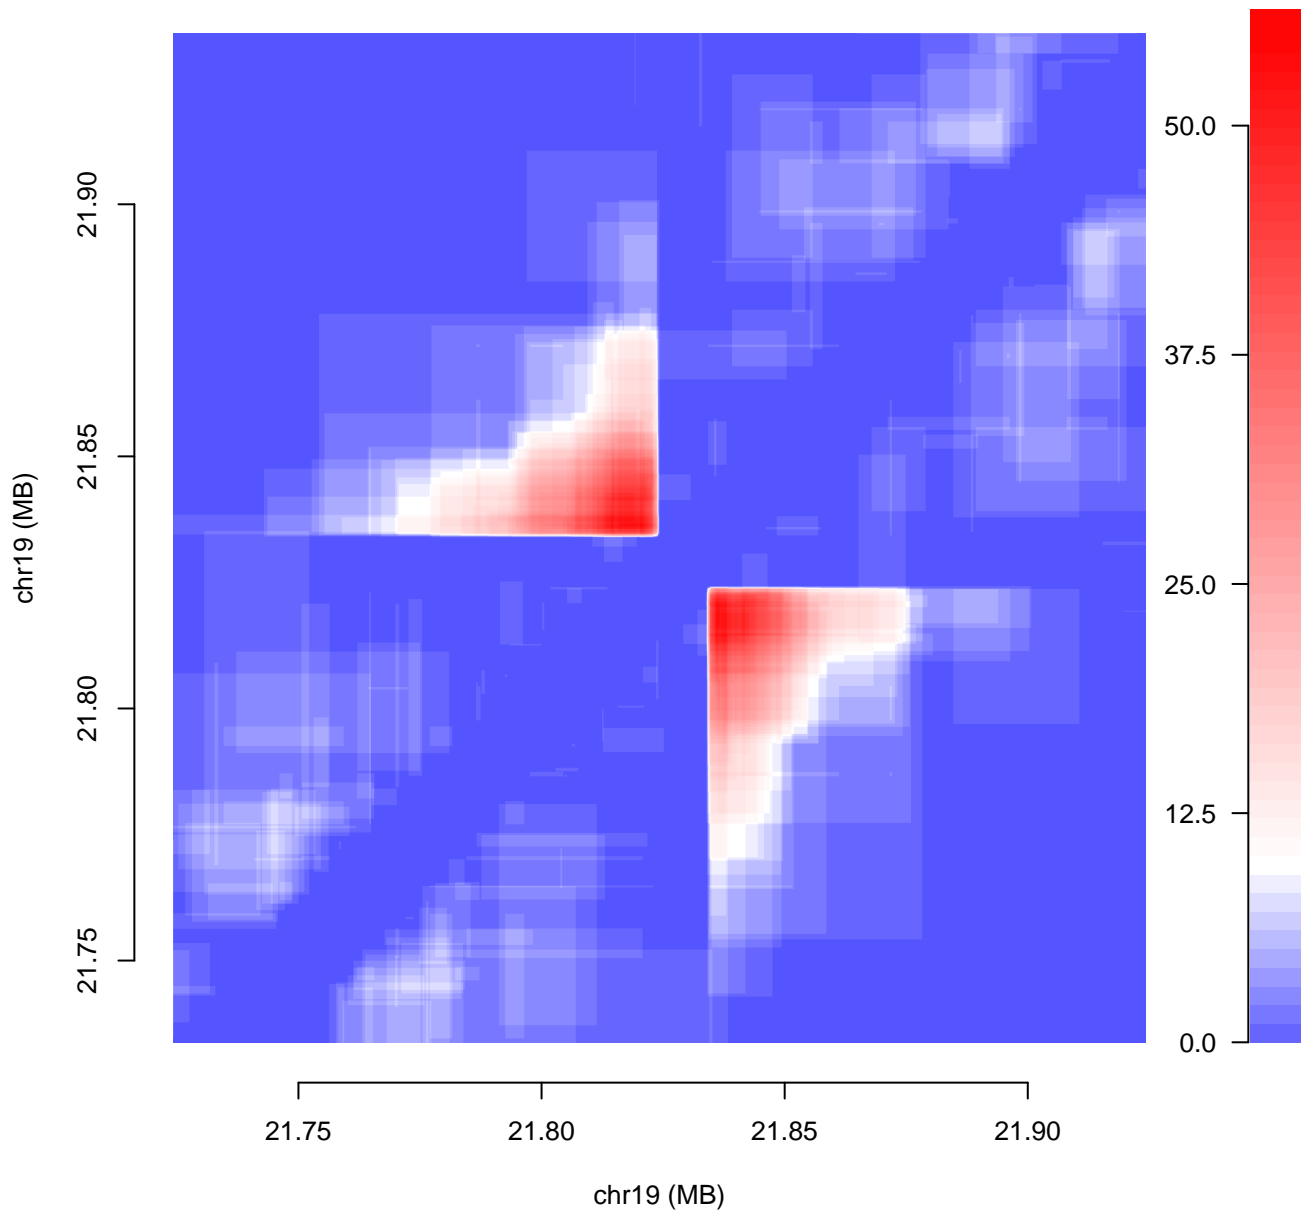

Supplement: Supplemental_Data.zip [file event_532.pdf › event_532.pdf]

Barcode

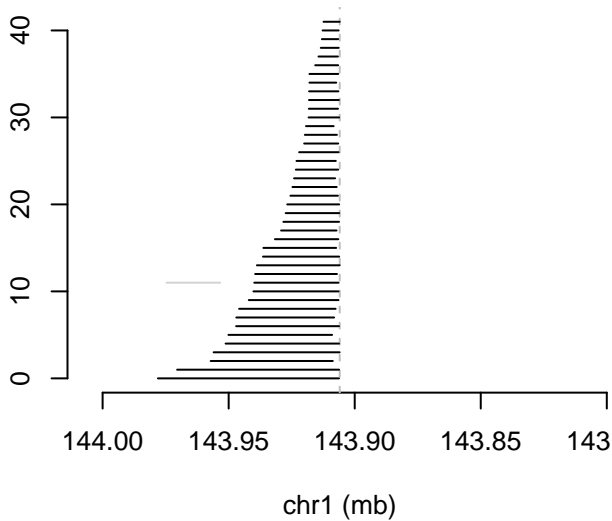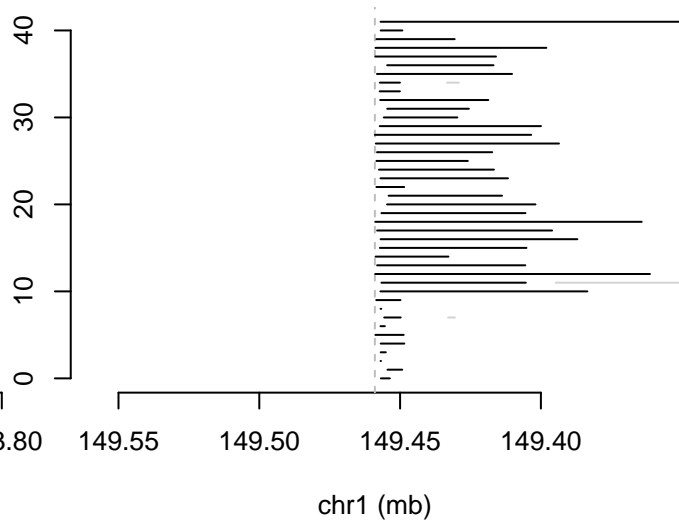

Copy number

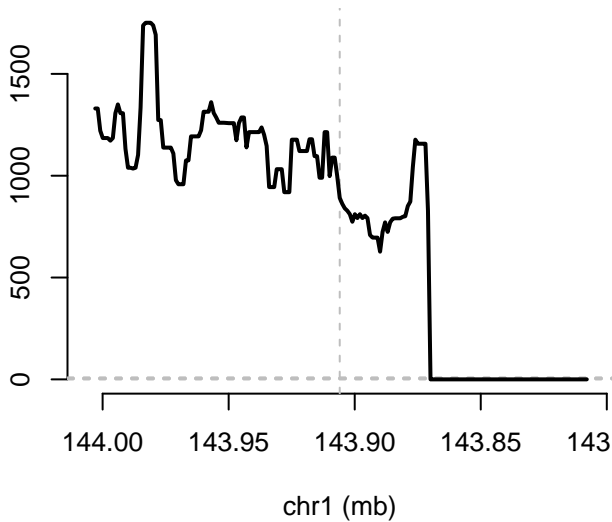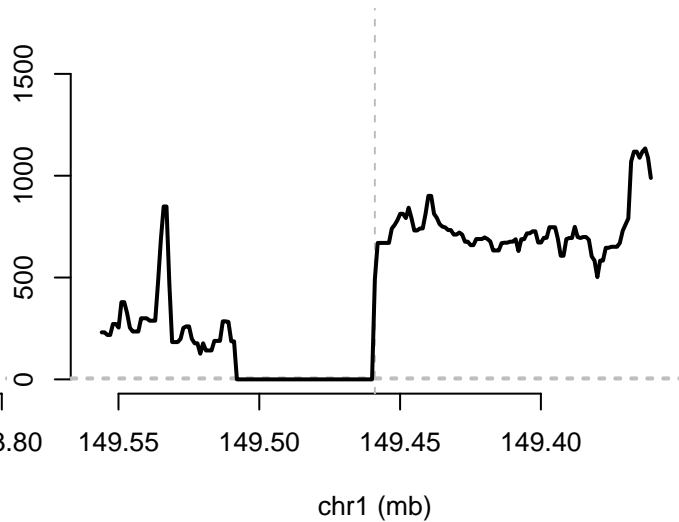

K562 chr1:149,458,955::chr1:143,905,937+-

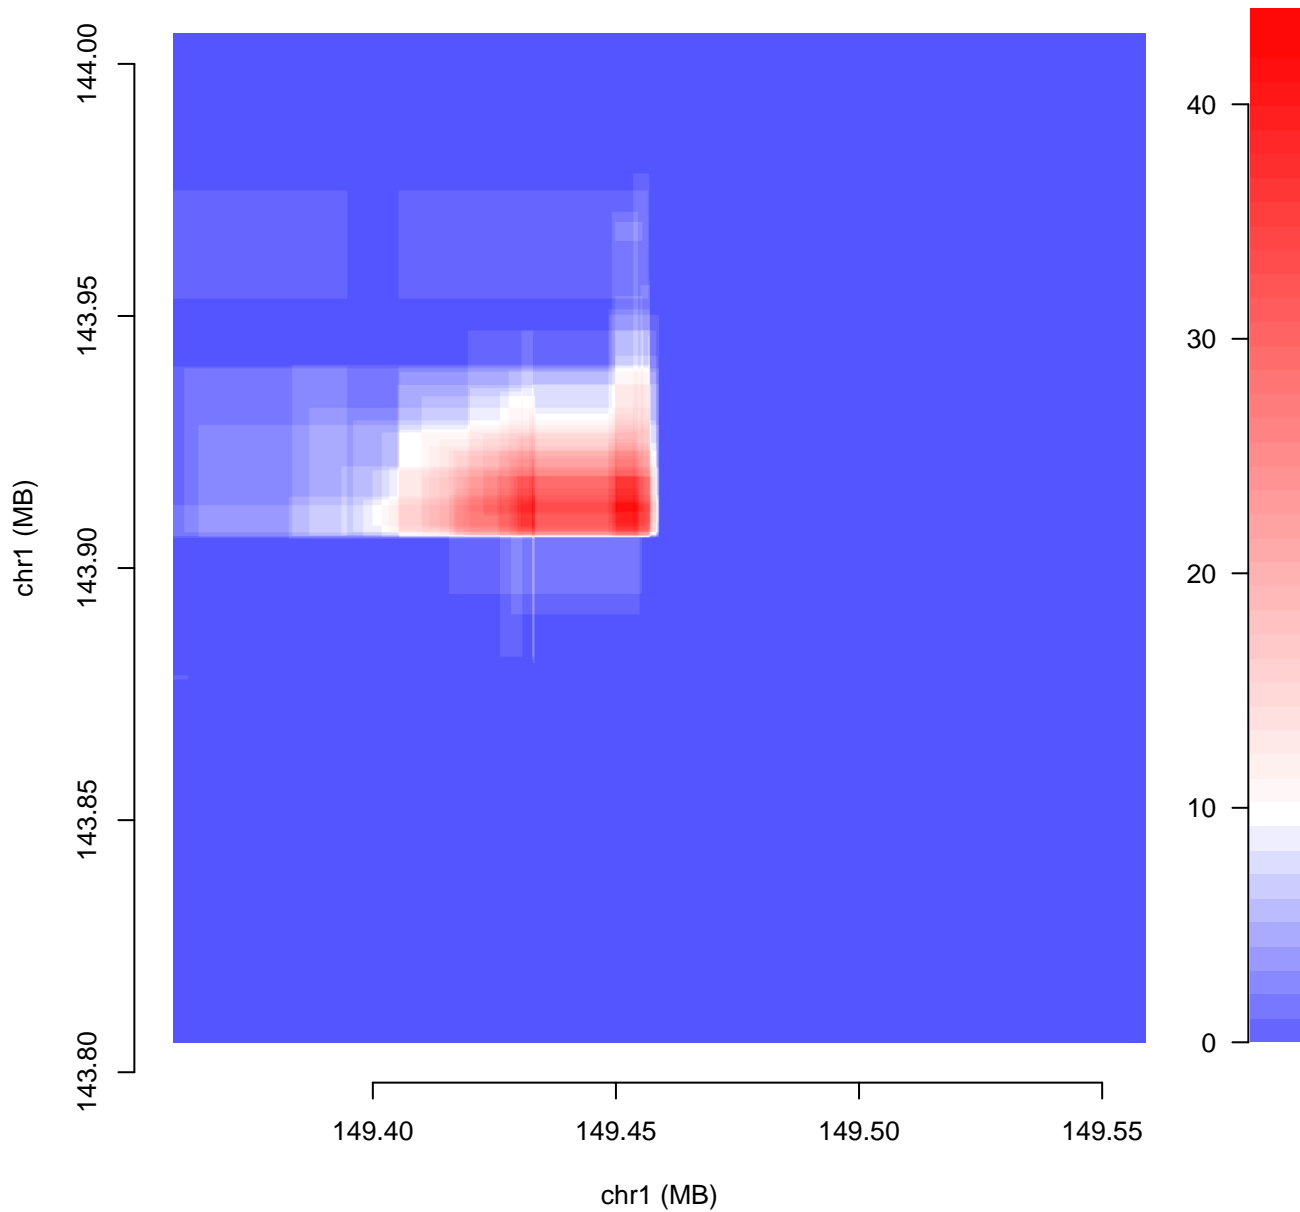

Supplement: Supplemental_Data.zip [file event_533.pdf › event_533.pdf]

Barcode

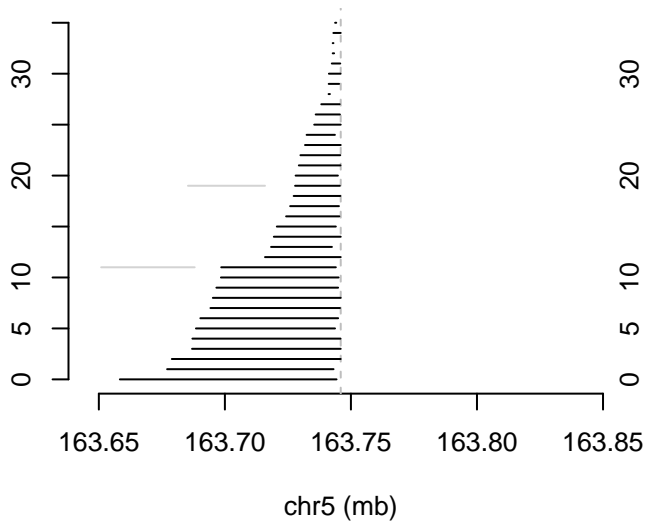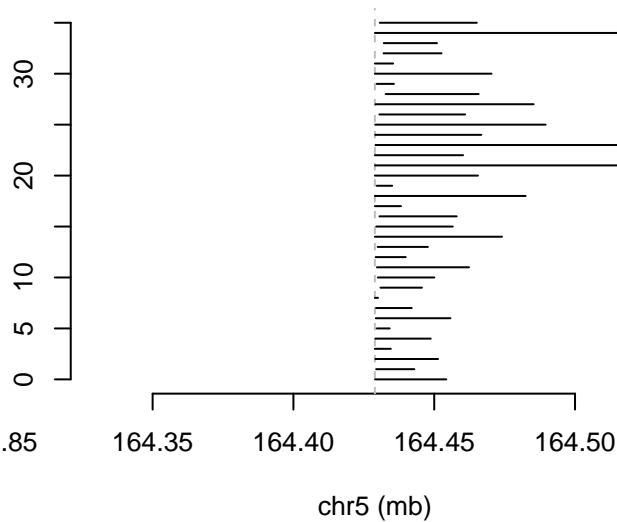

Copy number

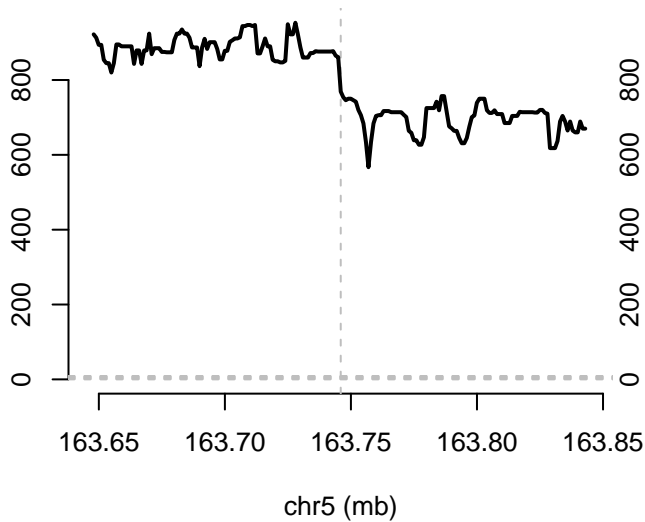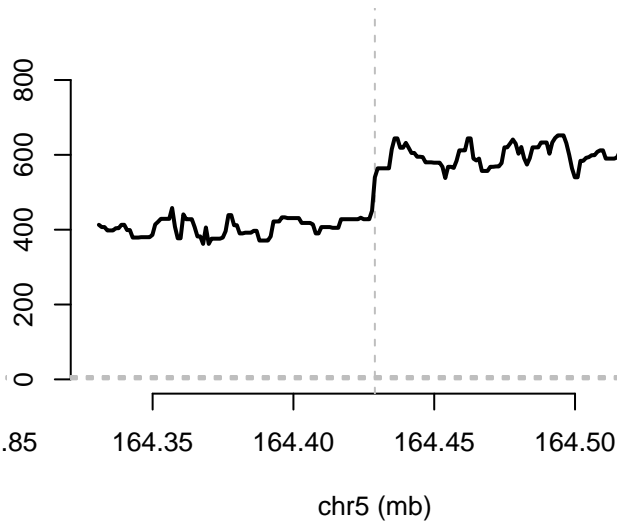

K562 chr5:164,428,925::chr5:163,745,961-+

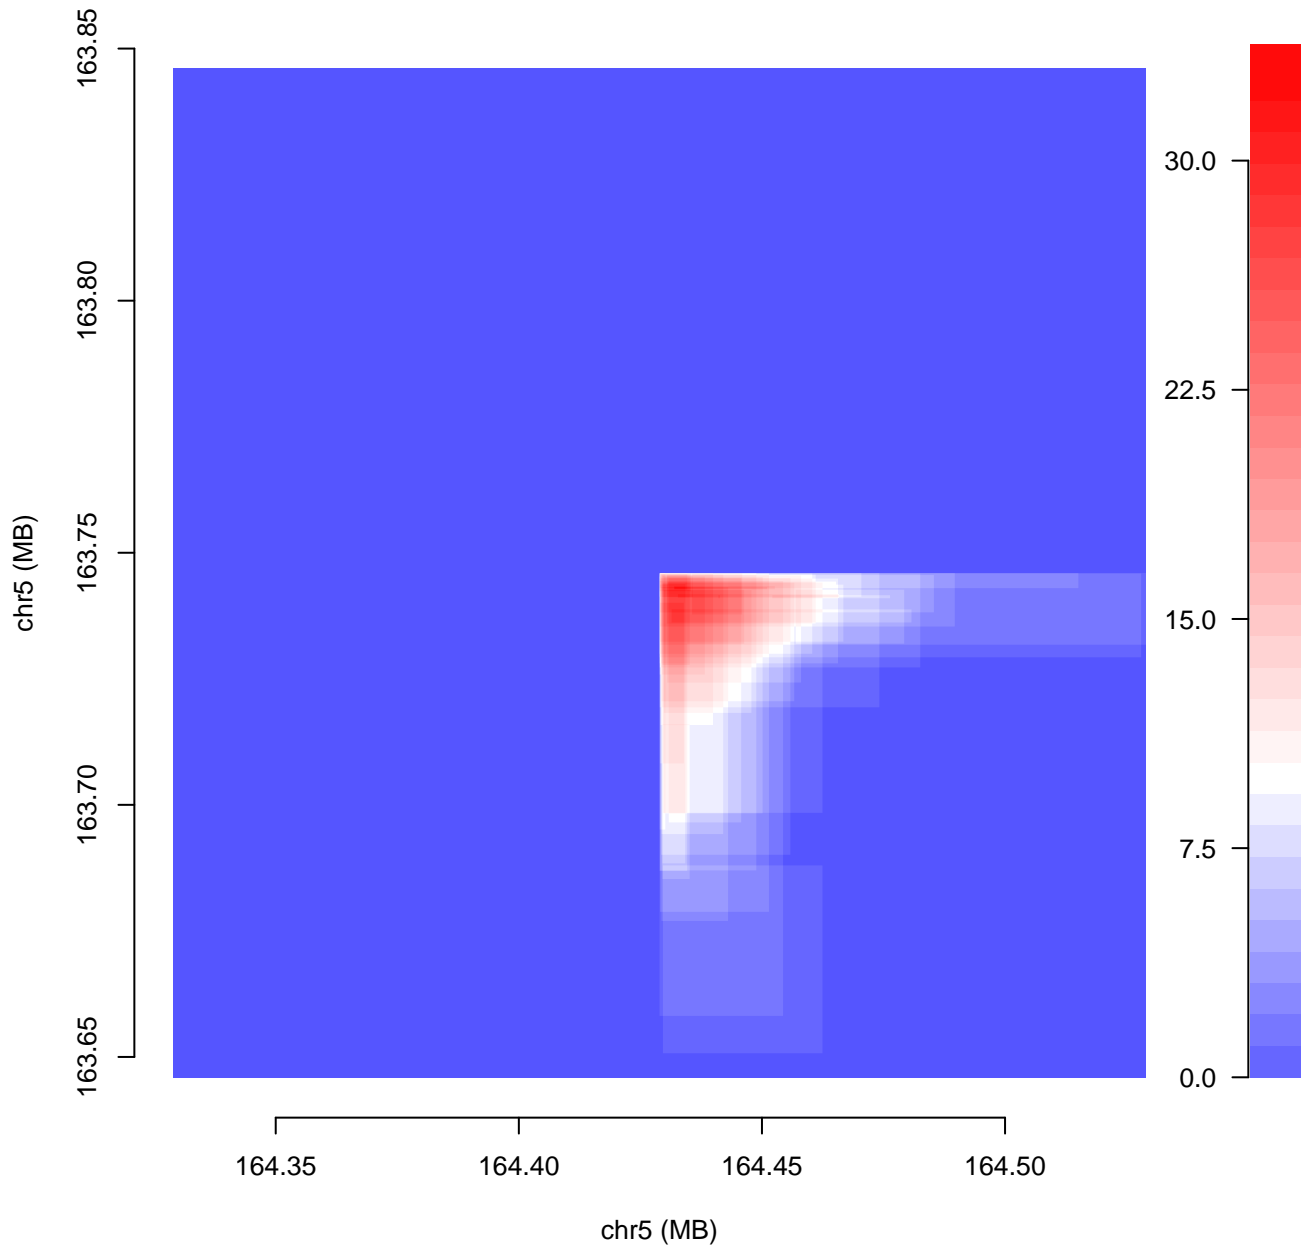

Supplement: Supplemental_Data.zip [file event_534.pdf › event_534.pdf]

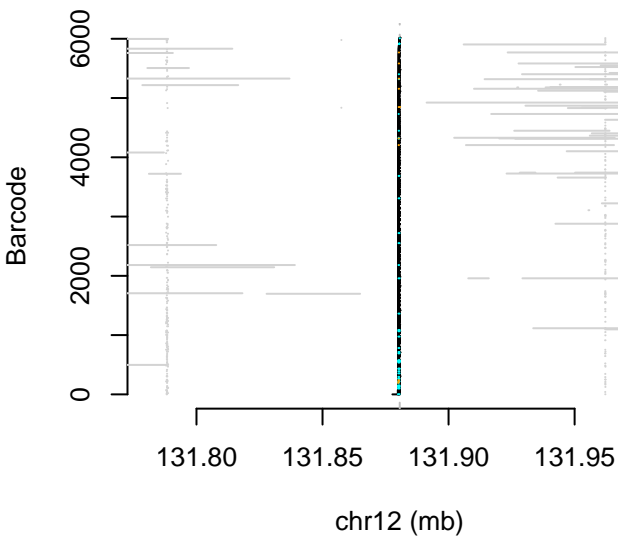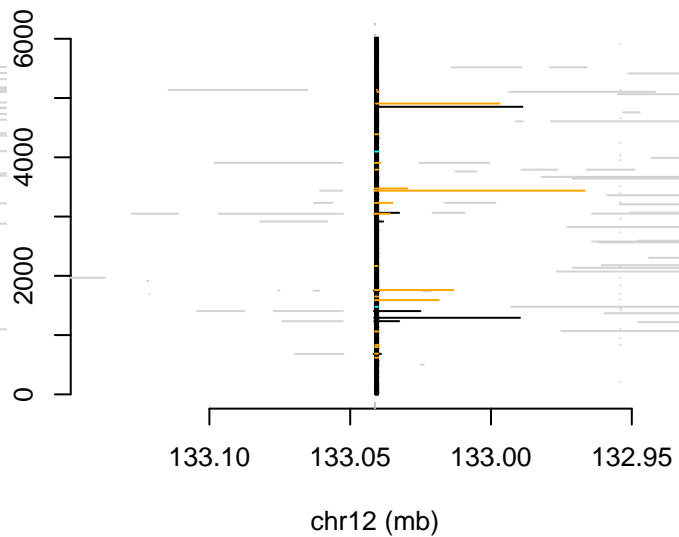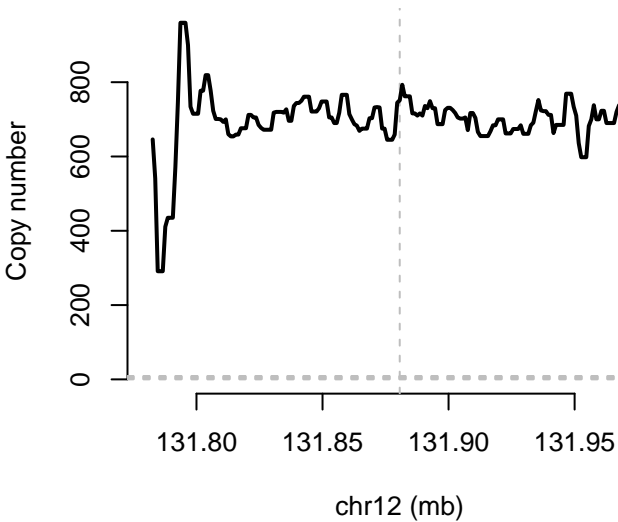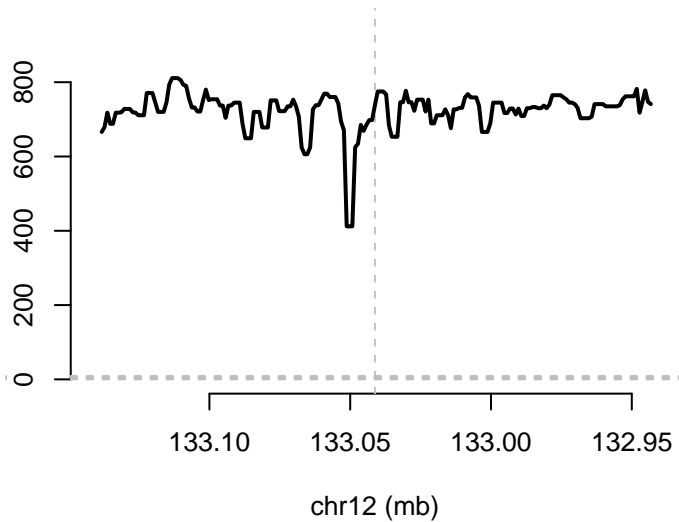

K562 chr12:133,041,239::chr12:131,880,631++

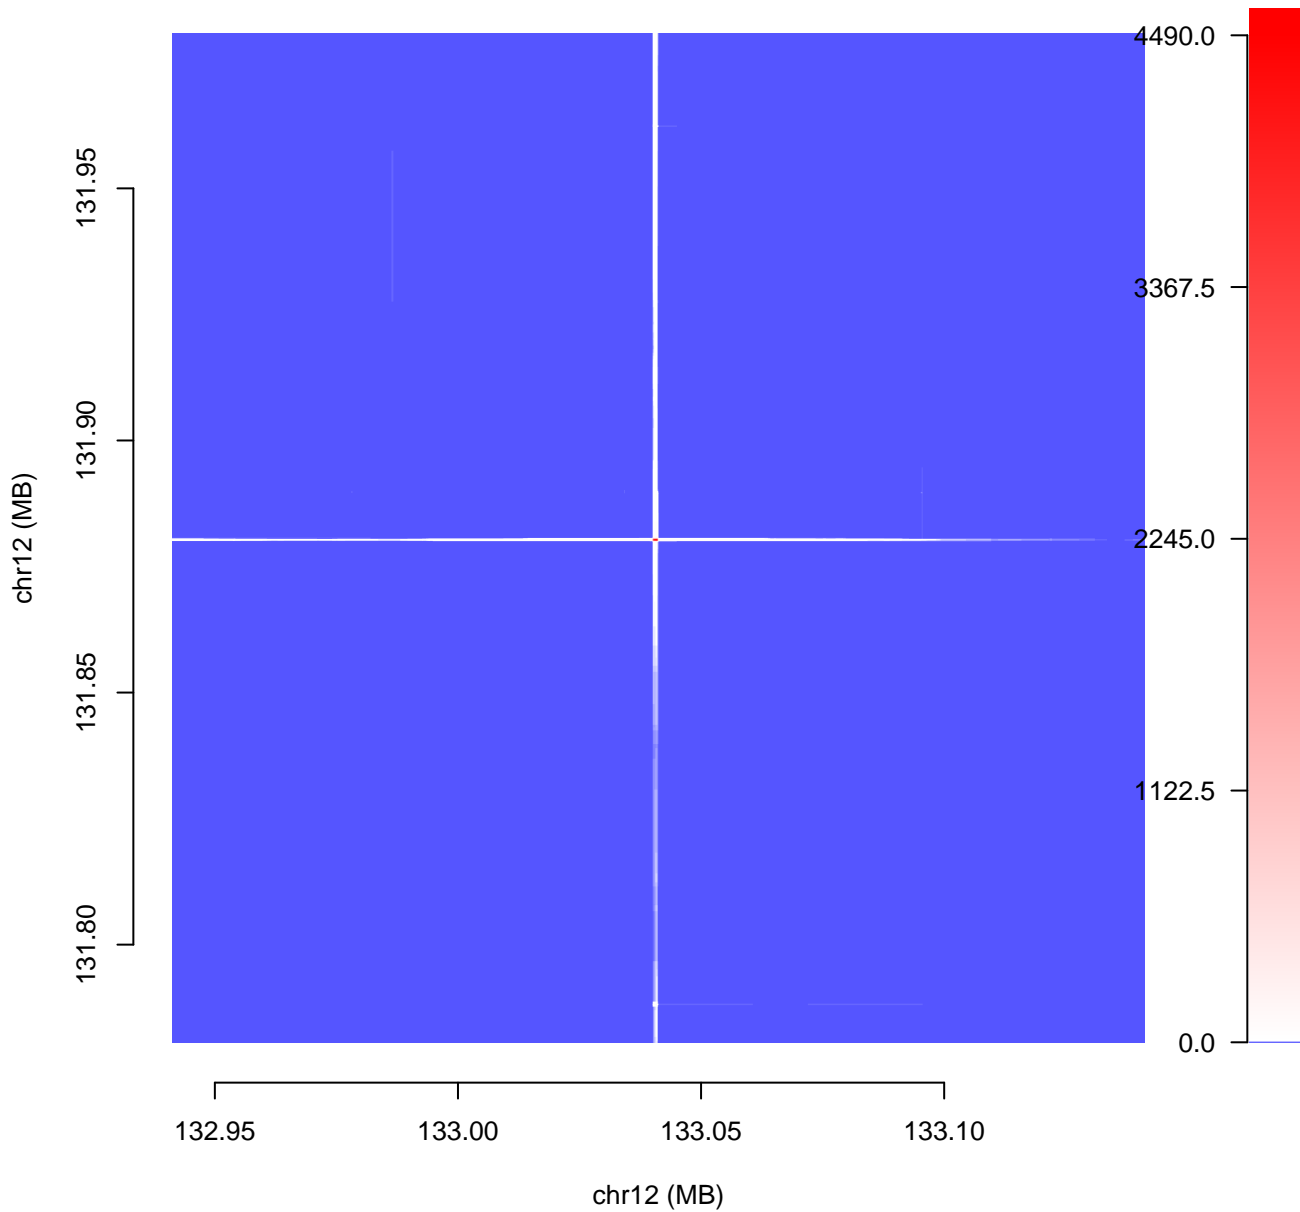

Supplement: Supplemental_Data.zip [file event_535.pdf › event_535.pdf]

Barcode

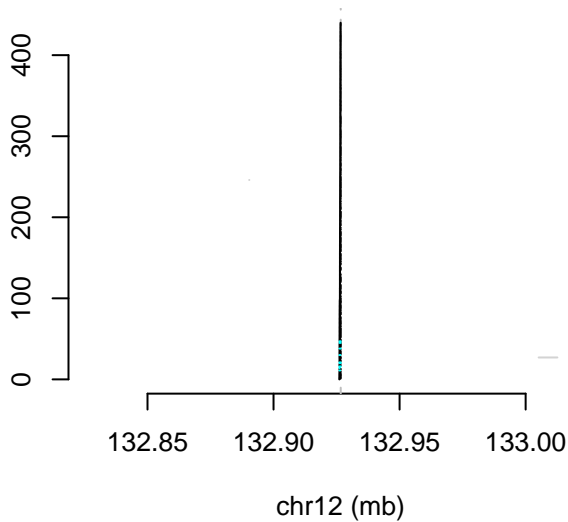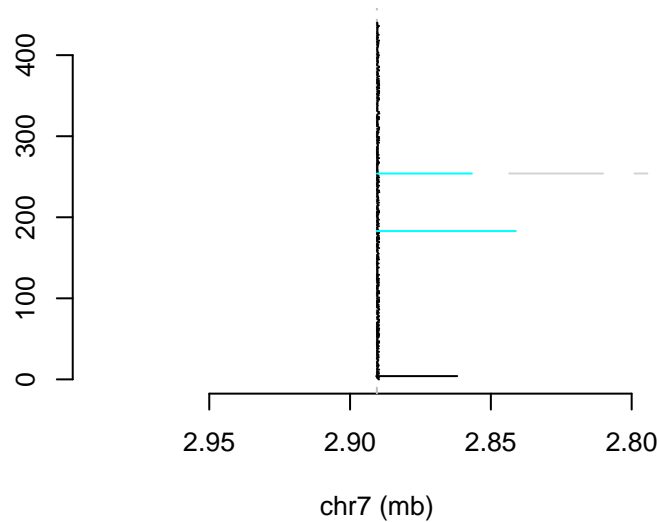

Copy number

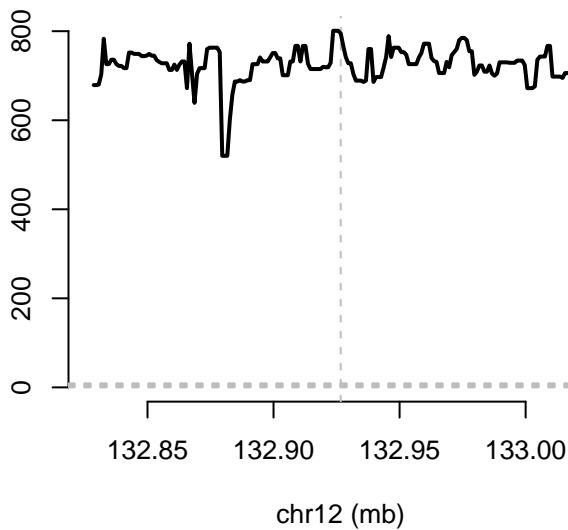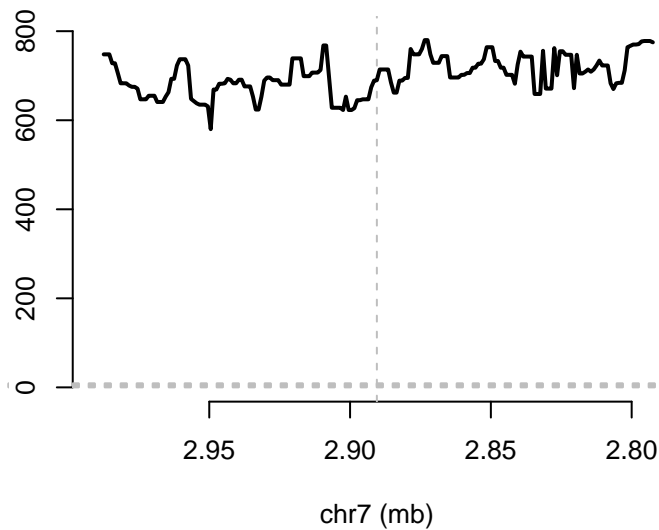

**K562 chr7:2,890,477::chr12:132,926,657++**

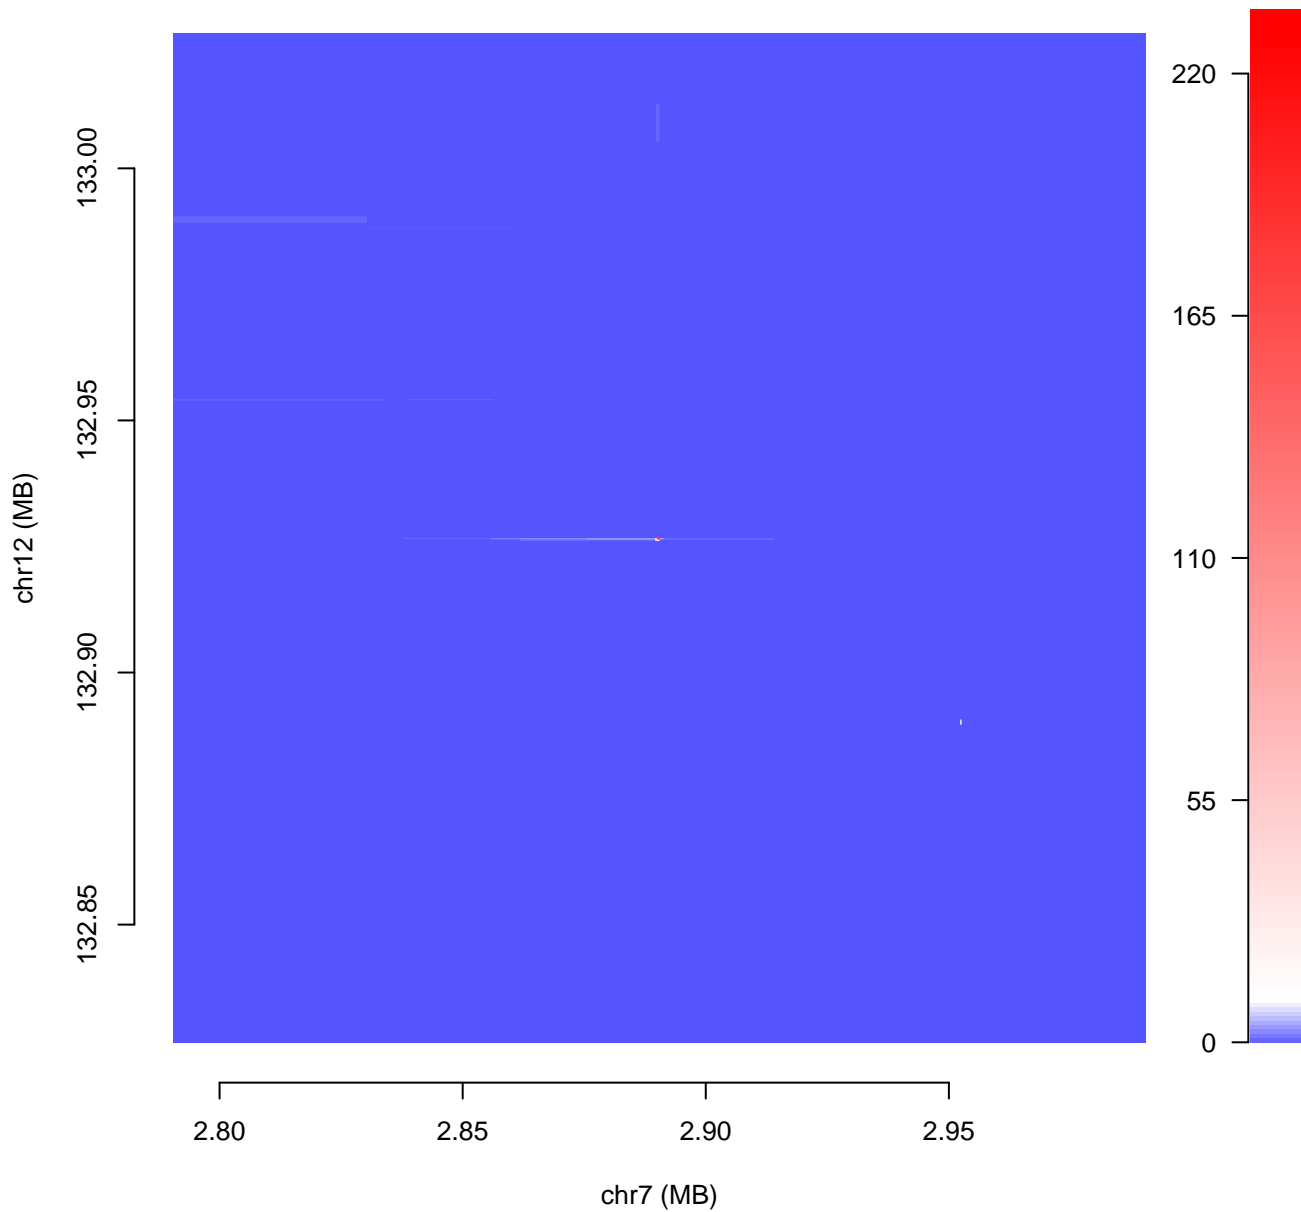

Supplement: Supplemental_Data.zip [file event_536.pdf › event_536.pdf]

Barcode

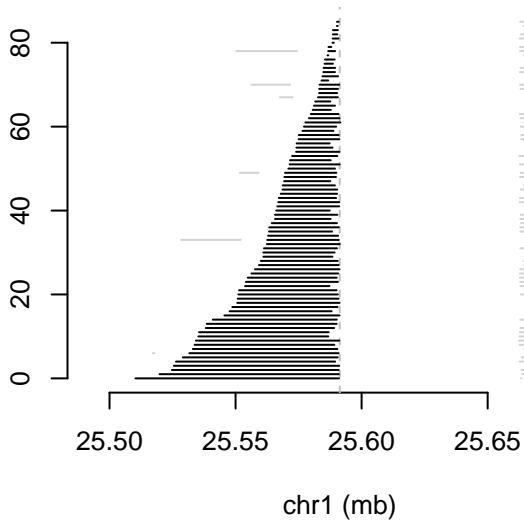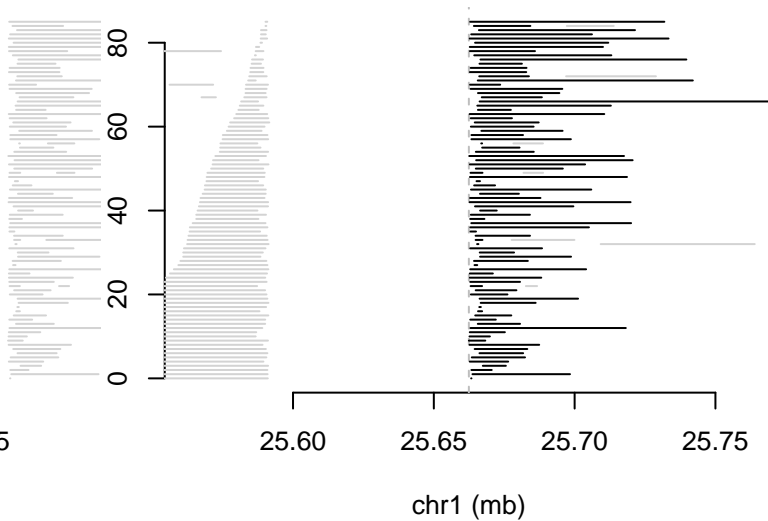

Copy number

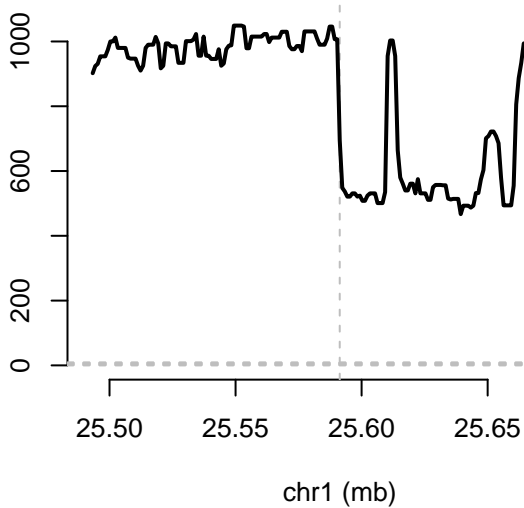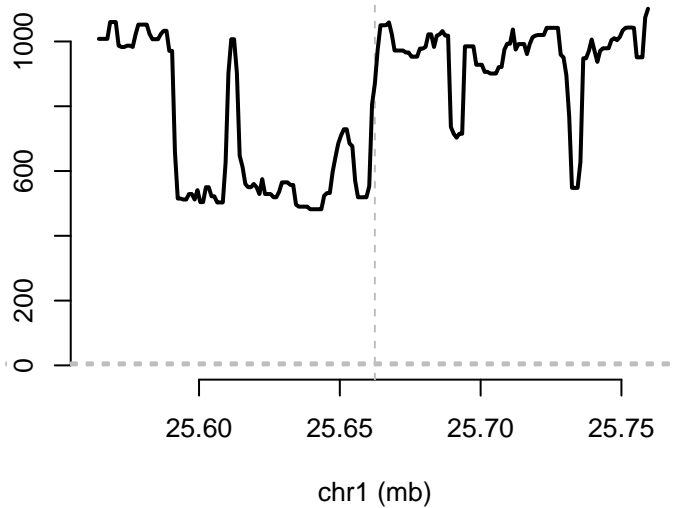

K562 chr1:25,662,449::chr1:25,591,325-+

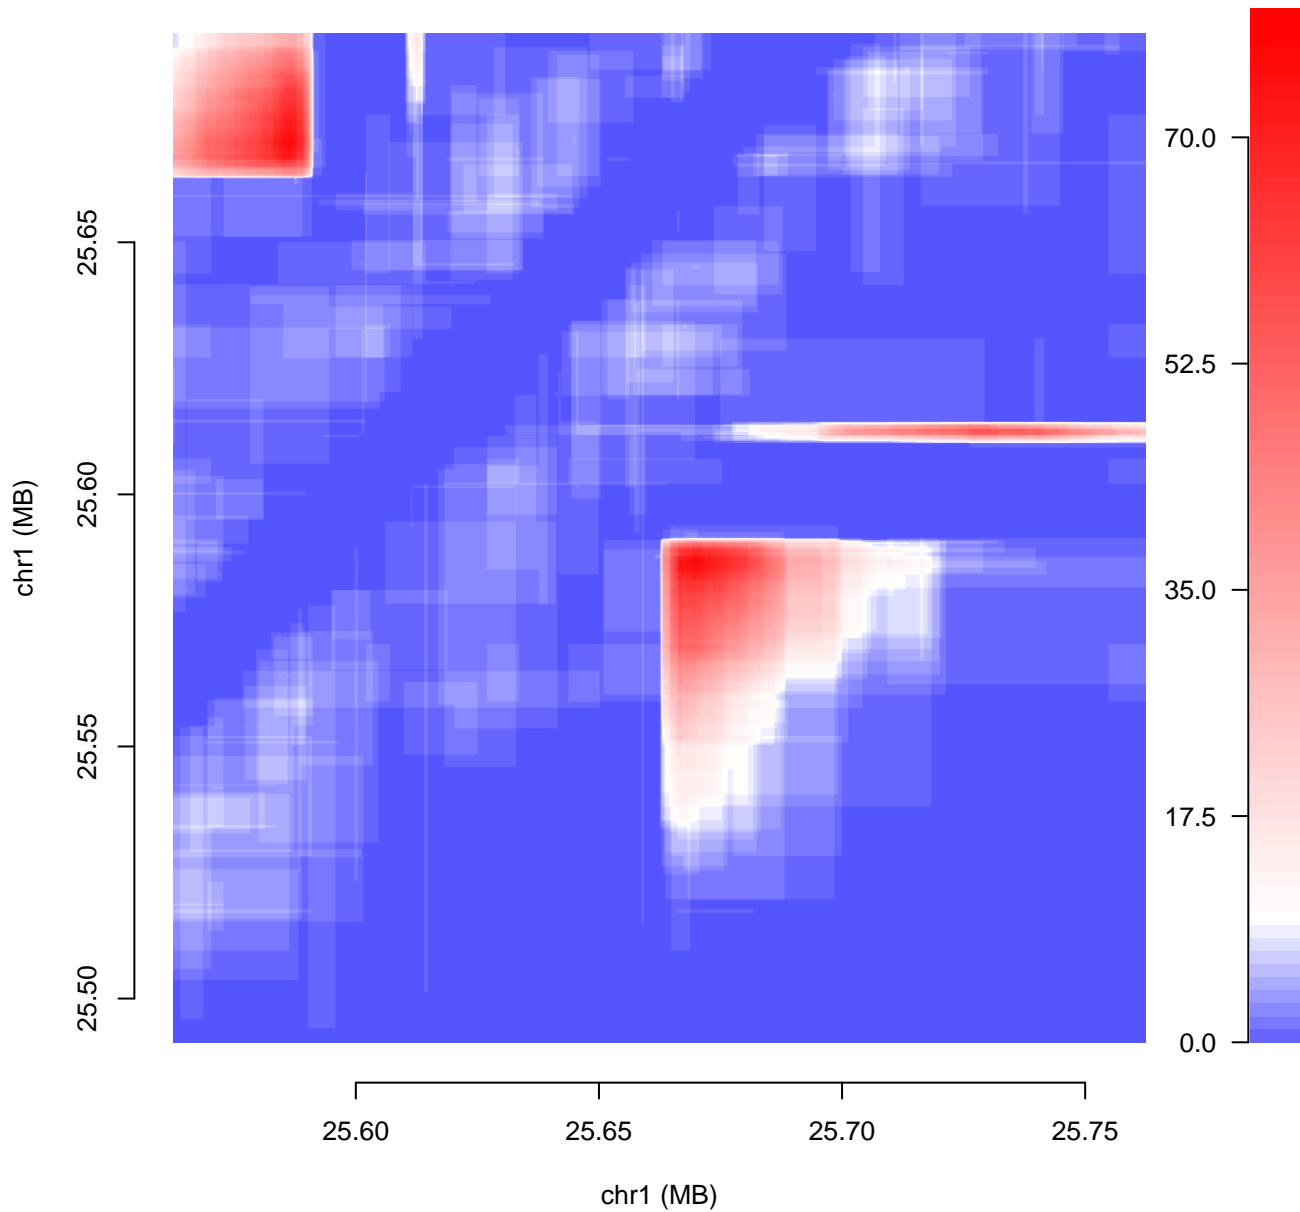

Supplement: Supplemental_Data.zip [file event_537.pdf › event_537.pdf]

Barcode

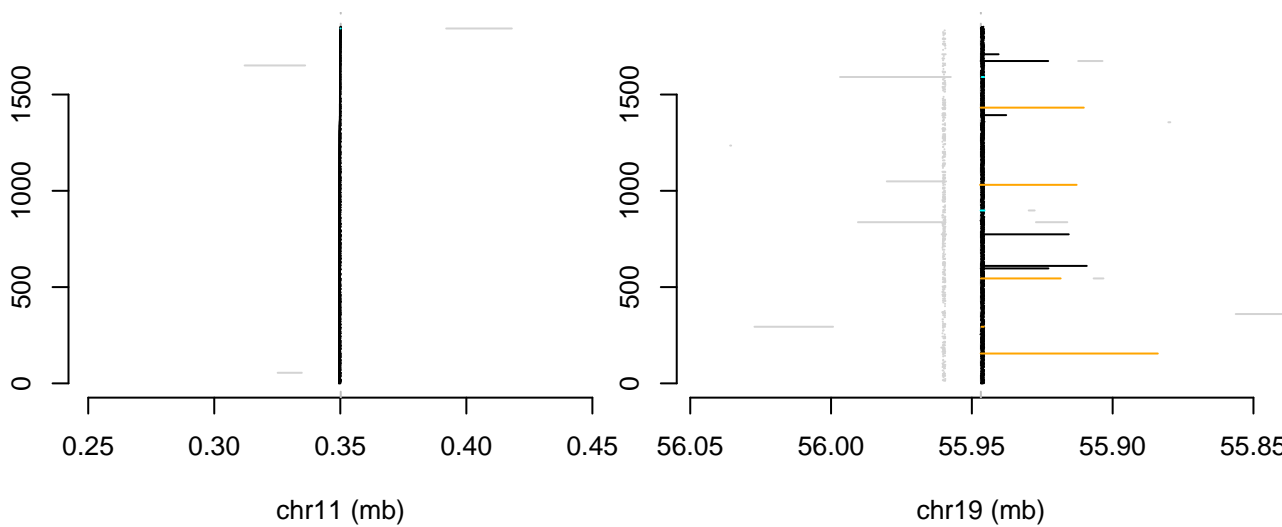

Copy number

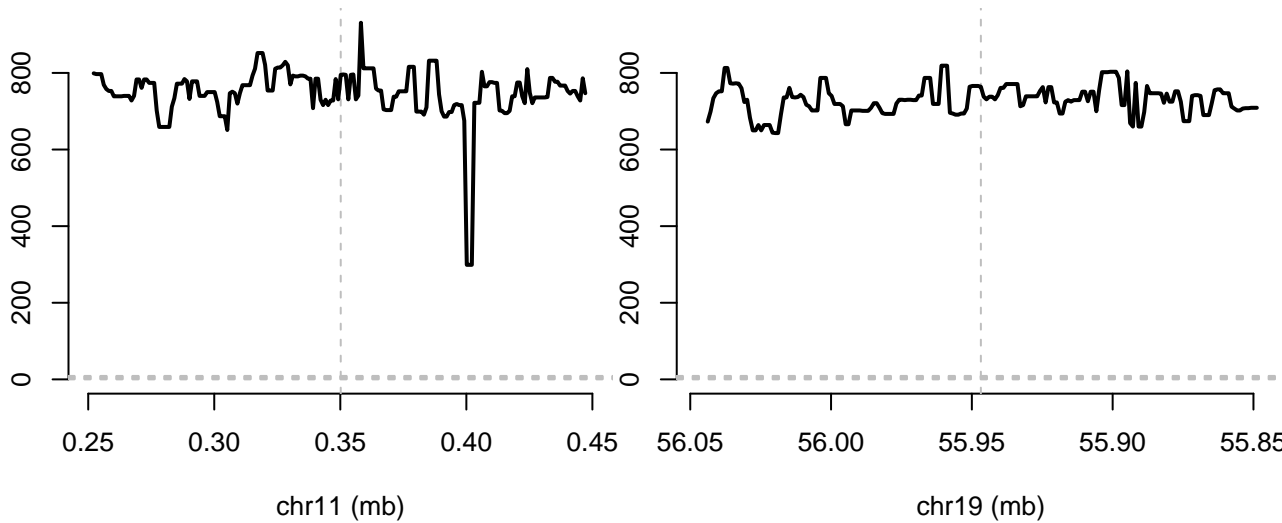

K562 chr19:55,946,795::chr11:350,172++

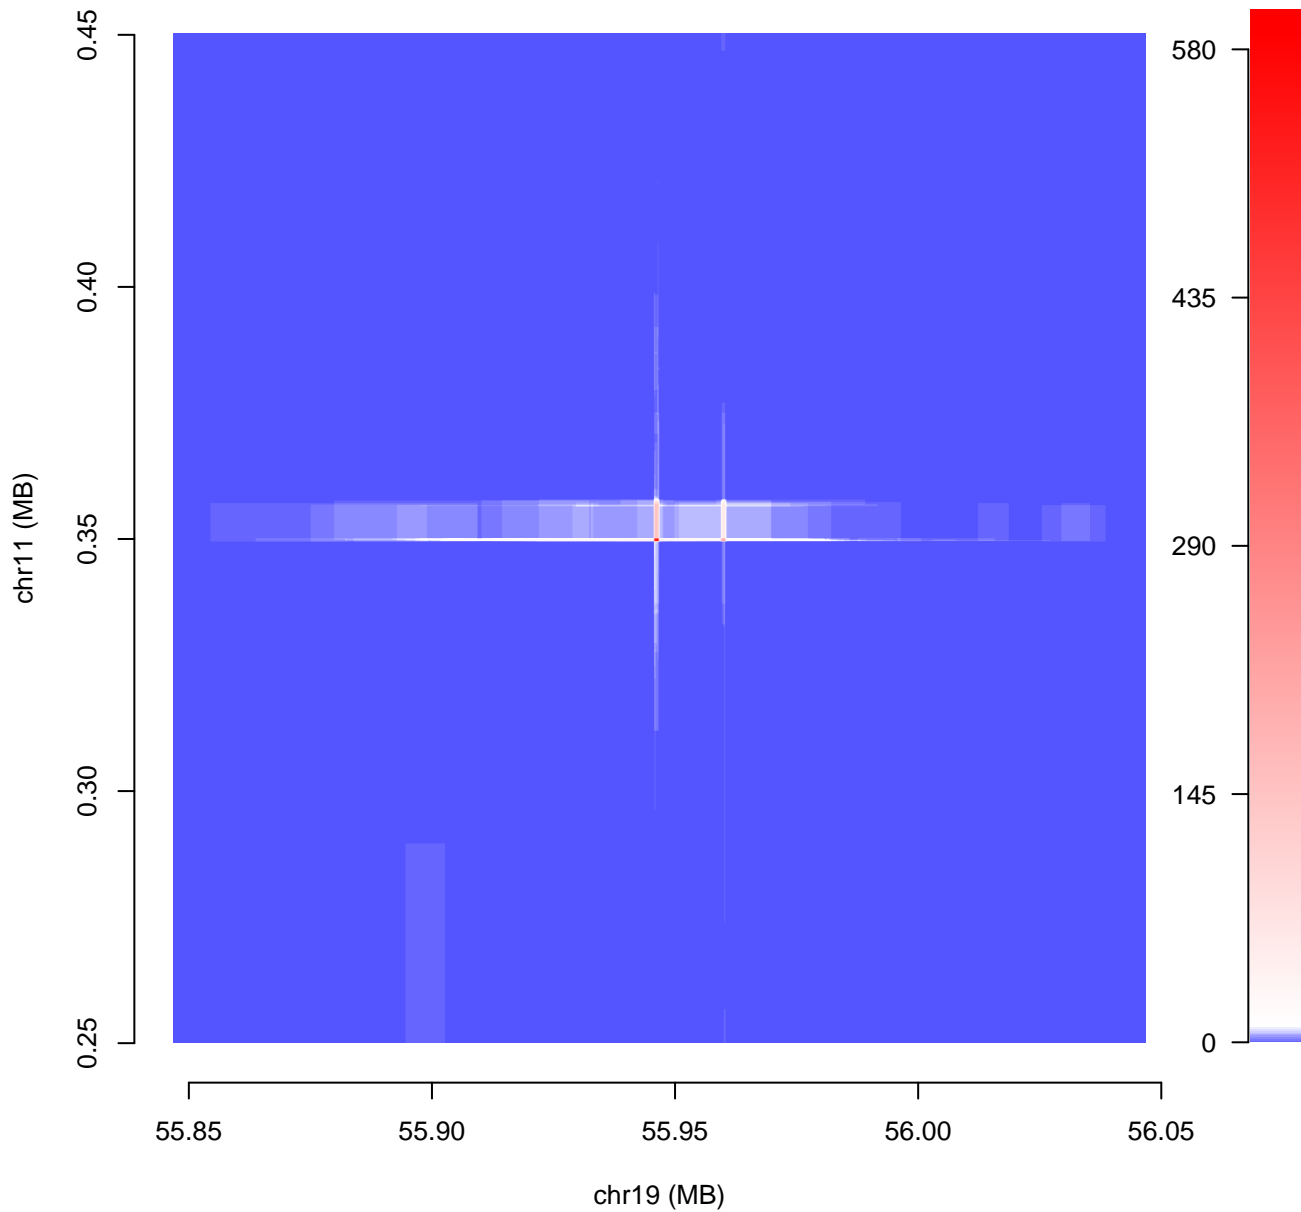

Supplement: Supplemental_Data.zip [file event_538.pdf › event_538.pdf]

Barcode

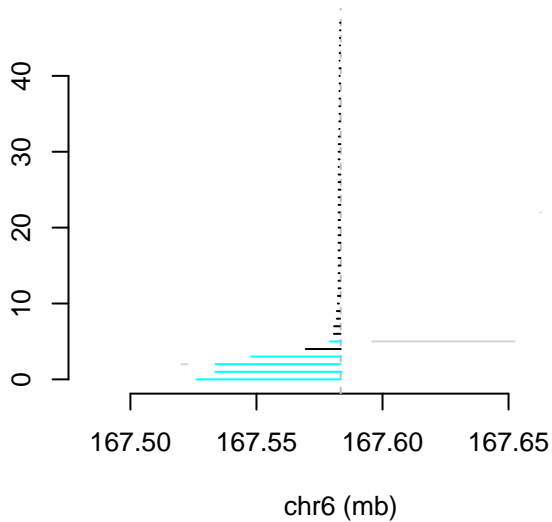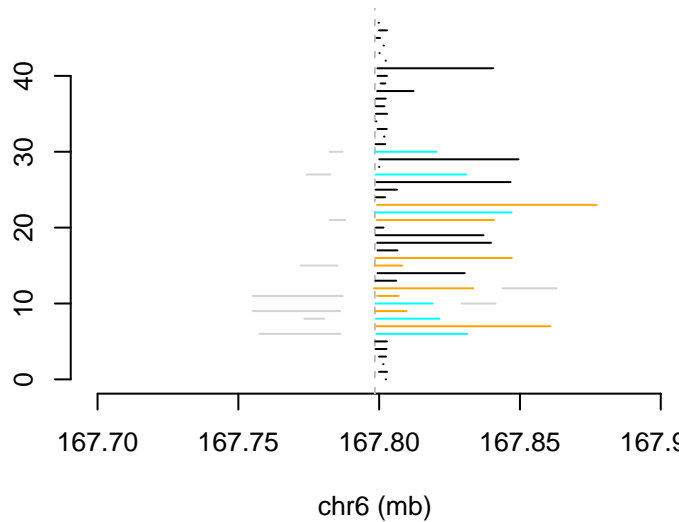

Copy number

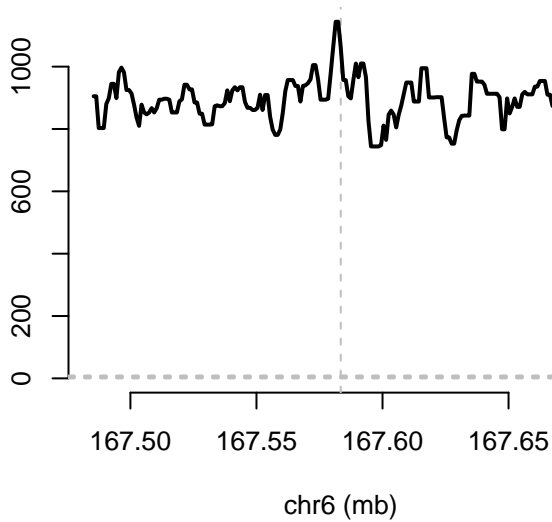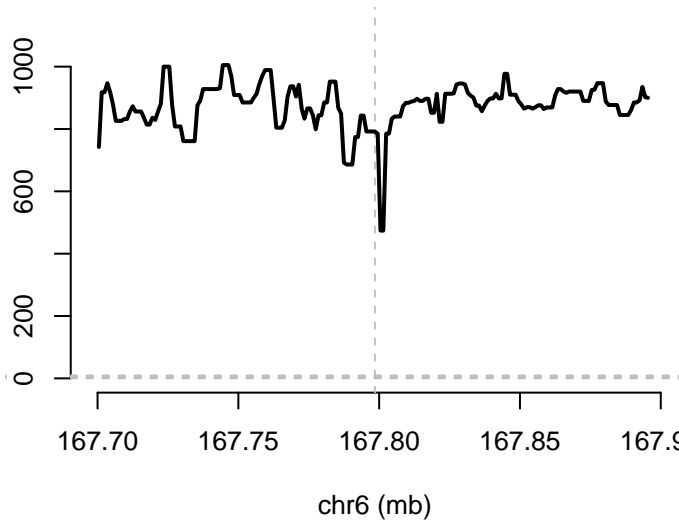

K562 chr6:167,798,477::chr6:167,583,432-+

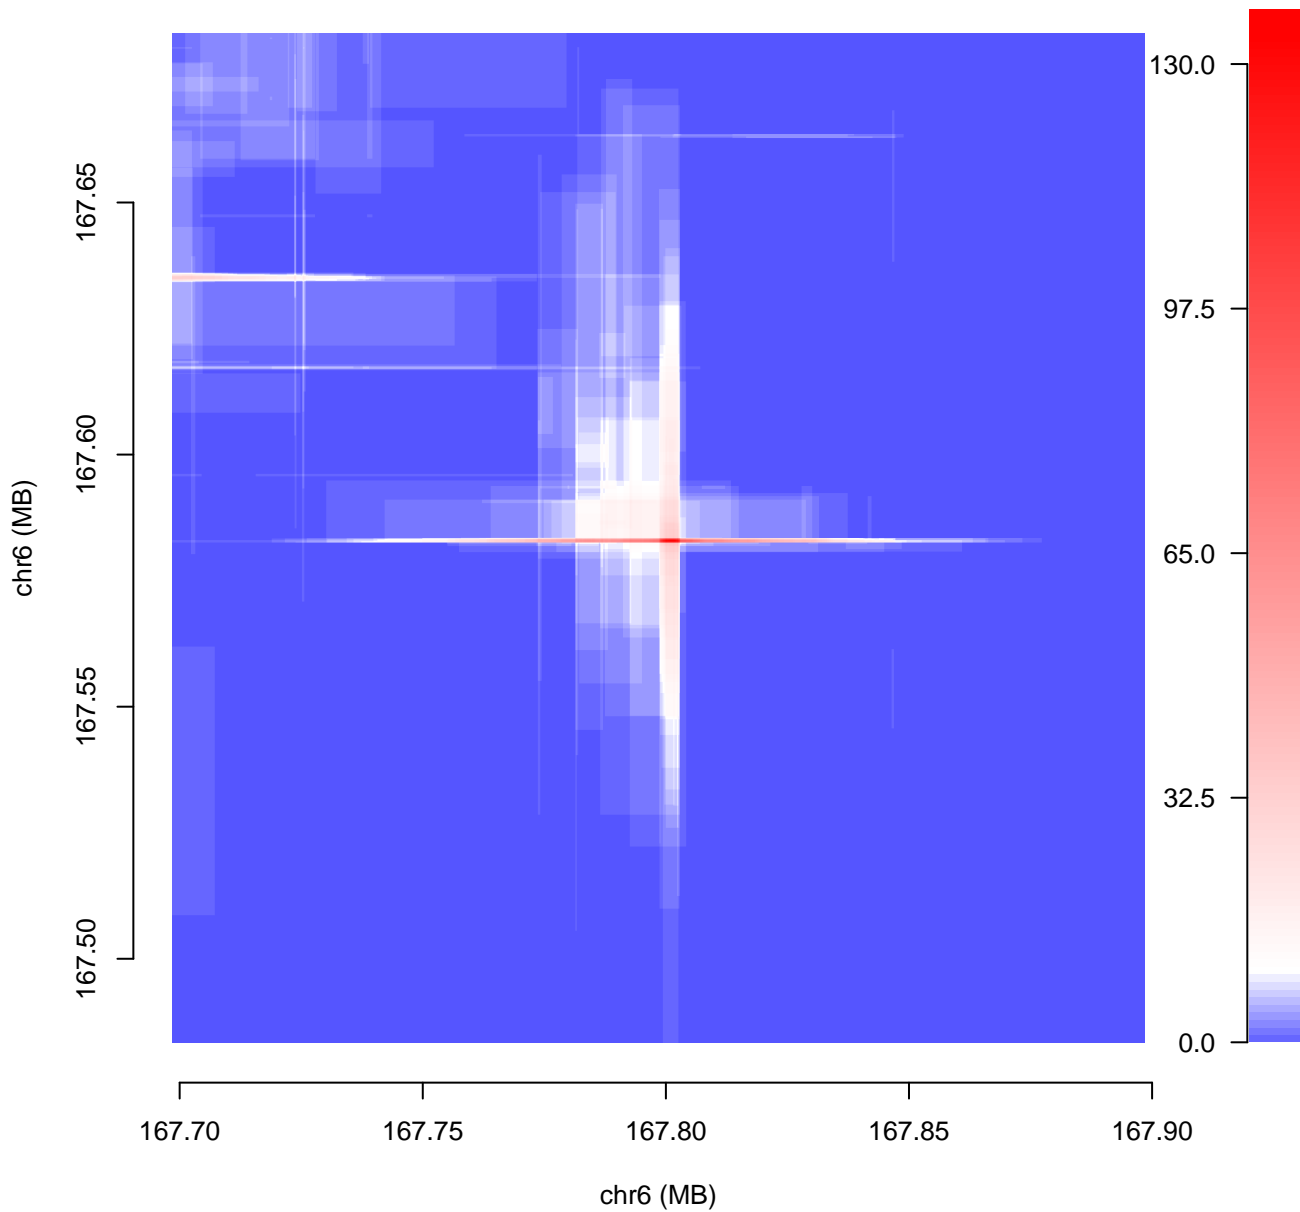

Supplement: Supplemental_Data.zip [file event_539.pdf › event_539.pdf]

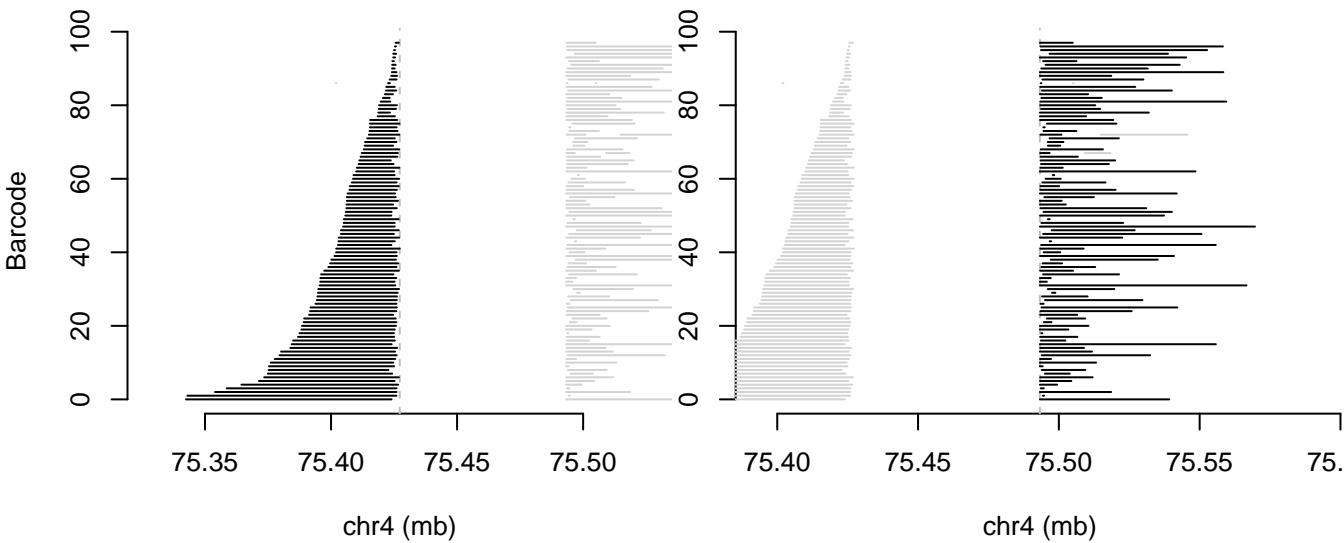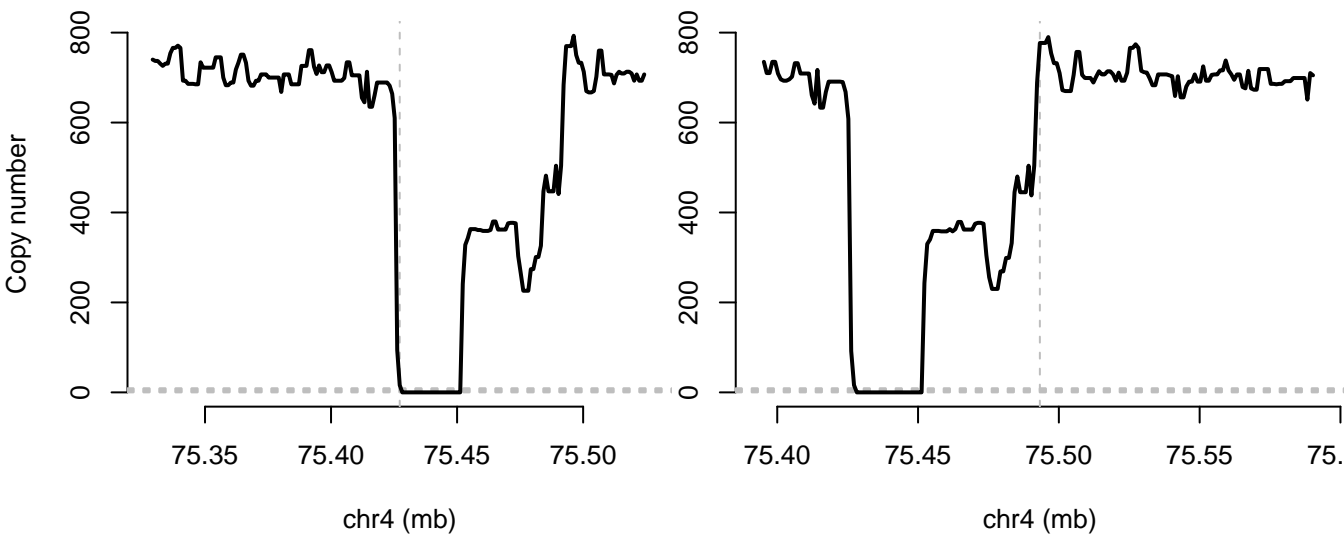

K562 chr4:75,427,250::chr4:75,493,260+-

chr4 (MB)

75.60  
75.55  
75.50  
75.45  
75.40

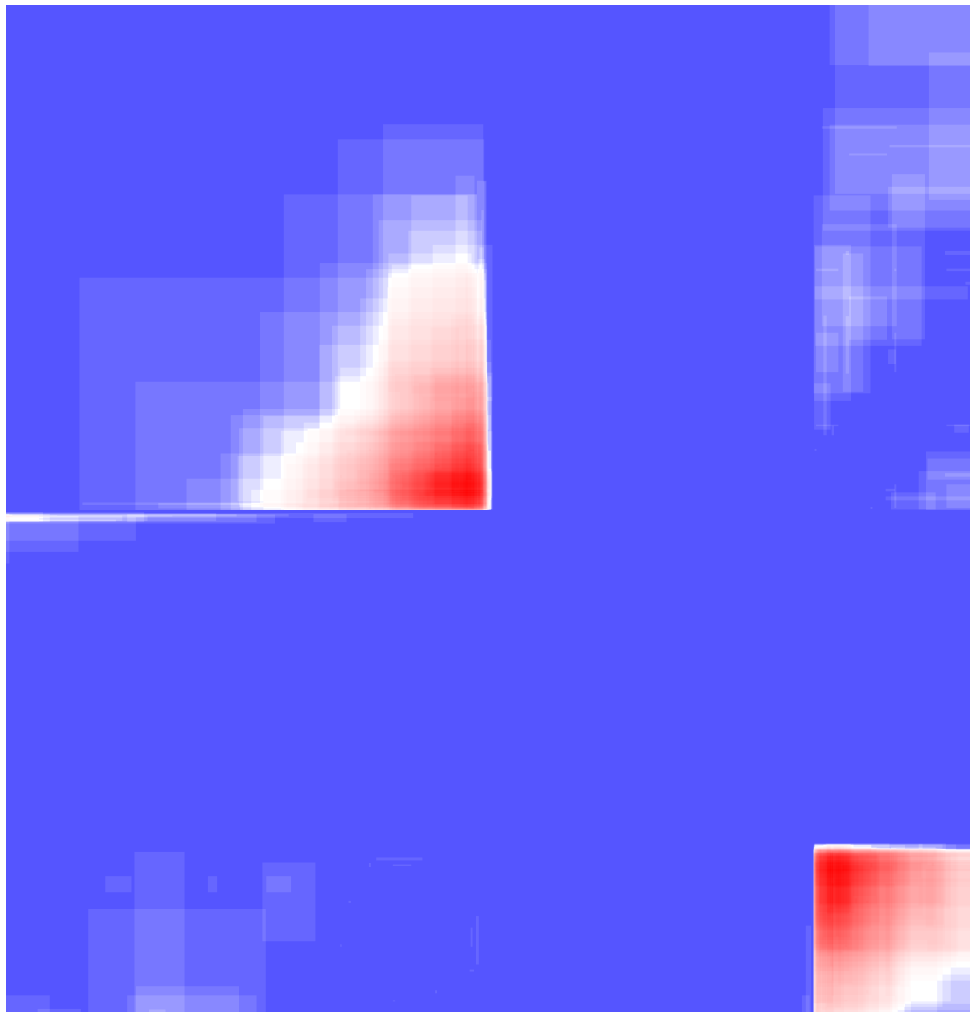

70.0  
52.5  
35.0  
17.5  
0.0

75.35

75.40

75.45

75.50

chr4 (MB)

Supplement: Supplemental_Data.zip [file event_54.pdf › event_54.pdf]

Barcode

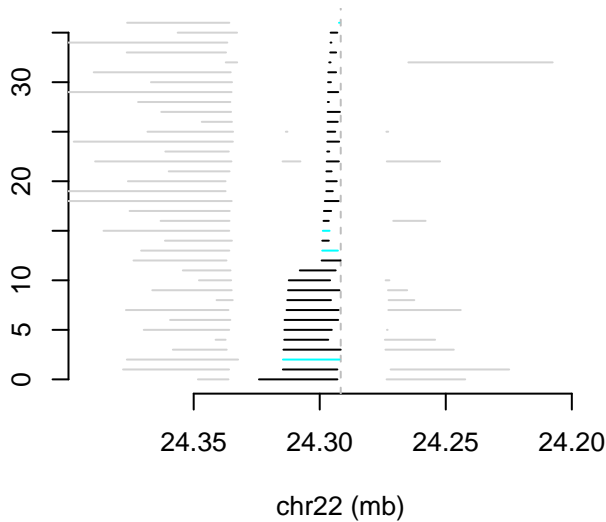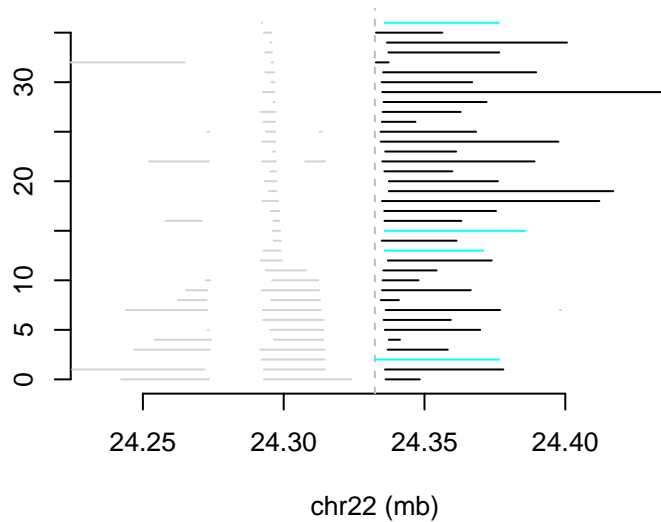

Copy number

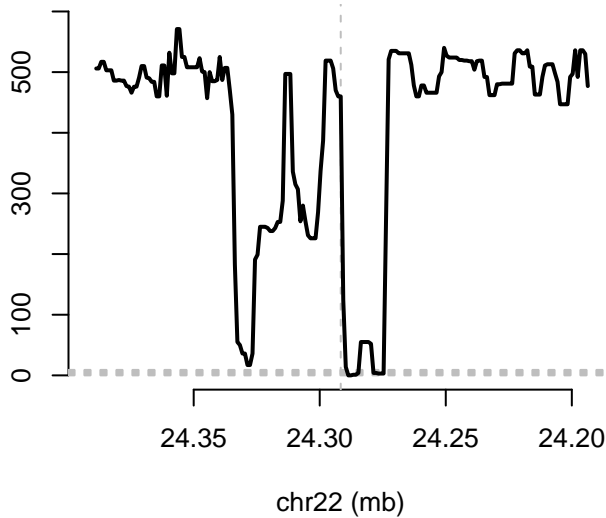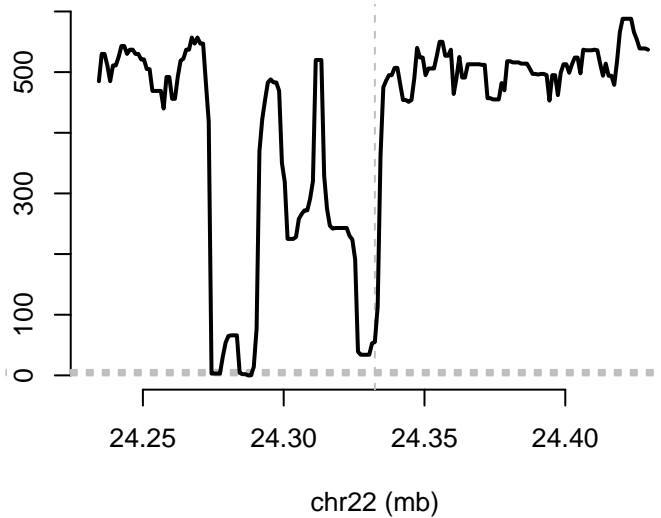

K562 chr22:24,291,662::chr22:24,332,380--

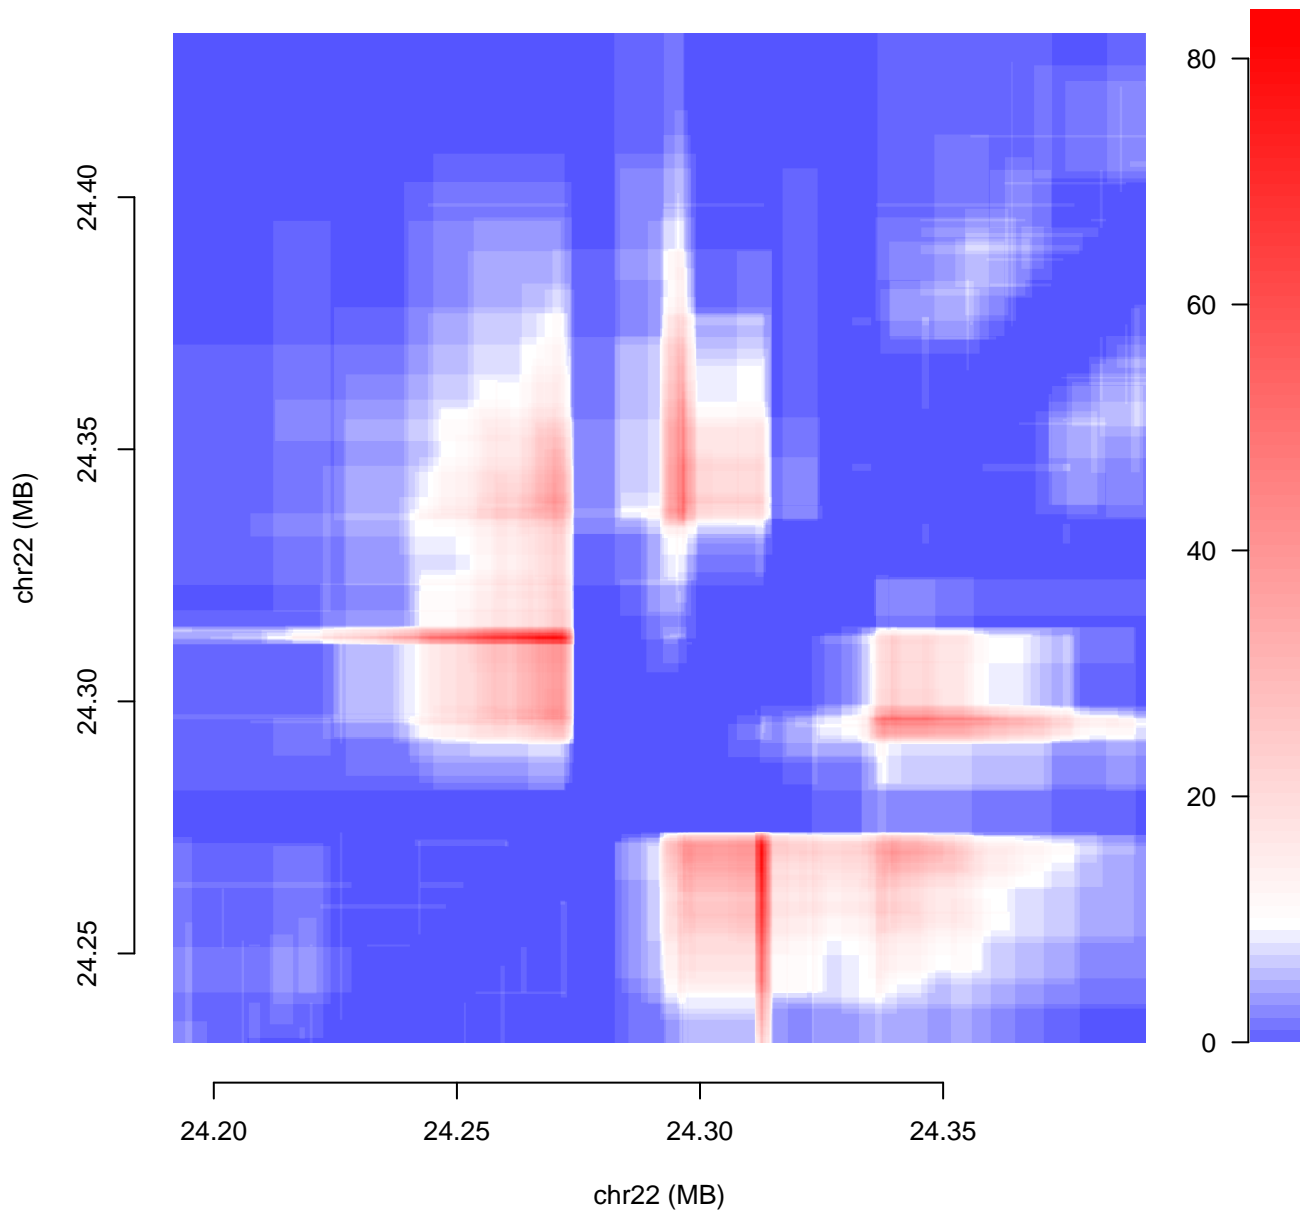

Supplement: Supplemental_Data.zip [file event_540.pdf › event_540.pdf]

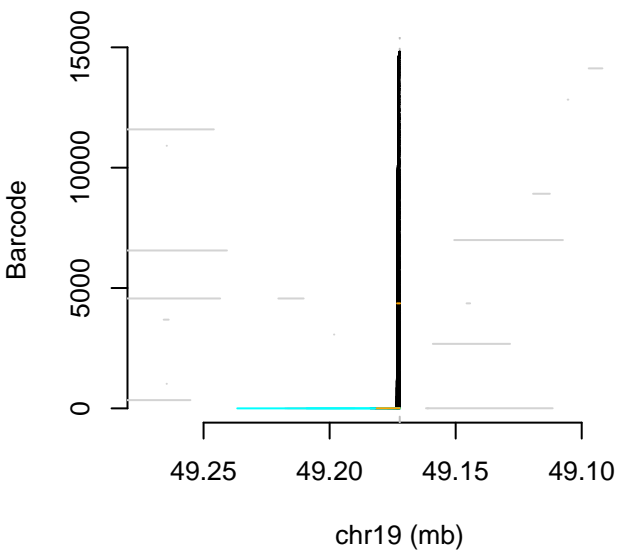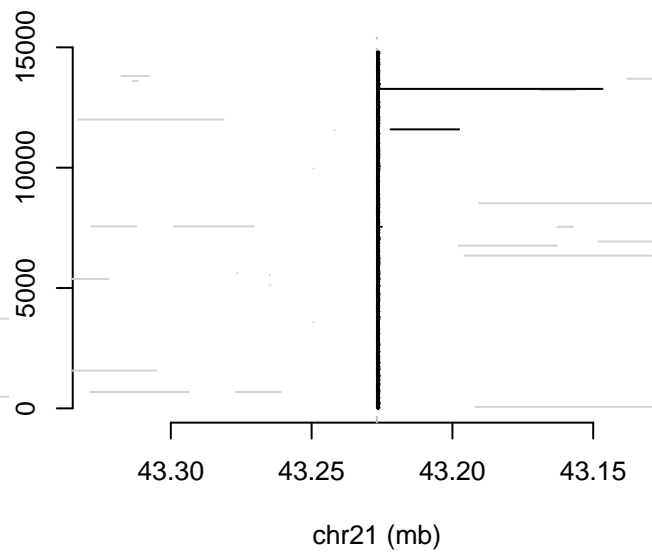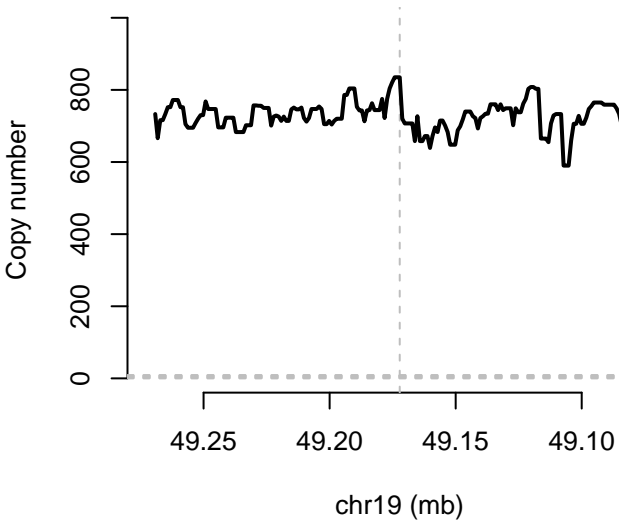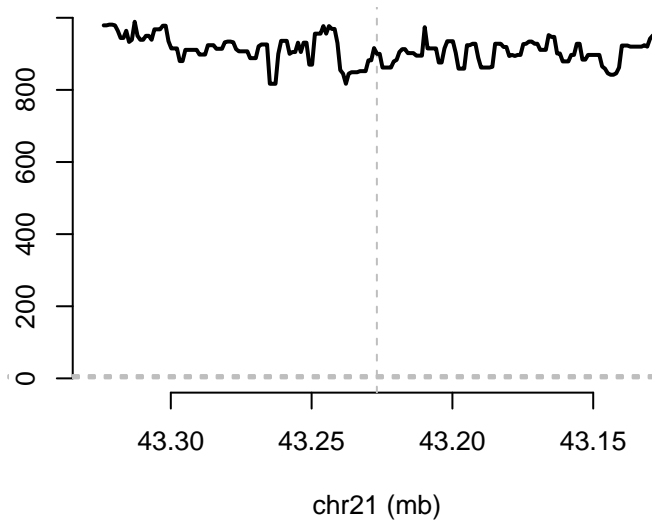

K562 chr19:49,172,185::chr21:43,226,829-+

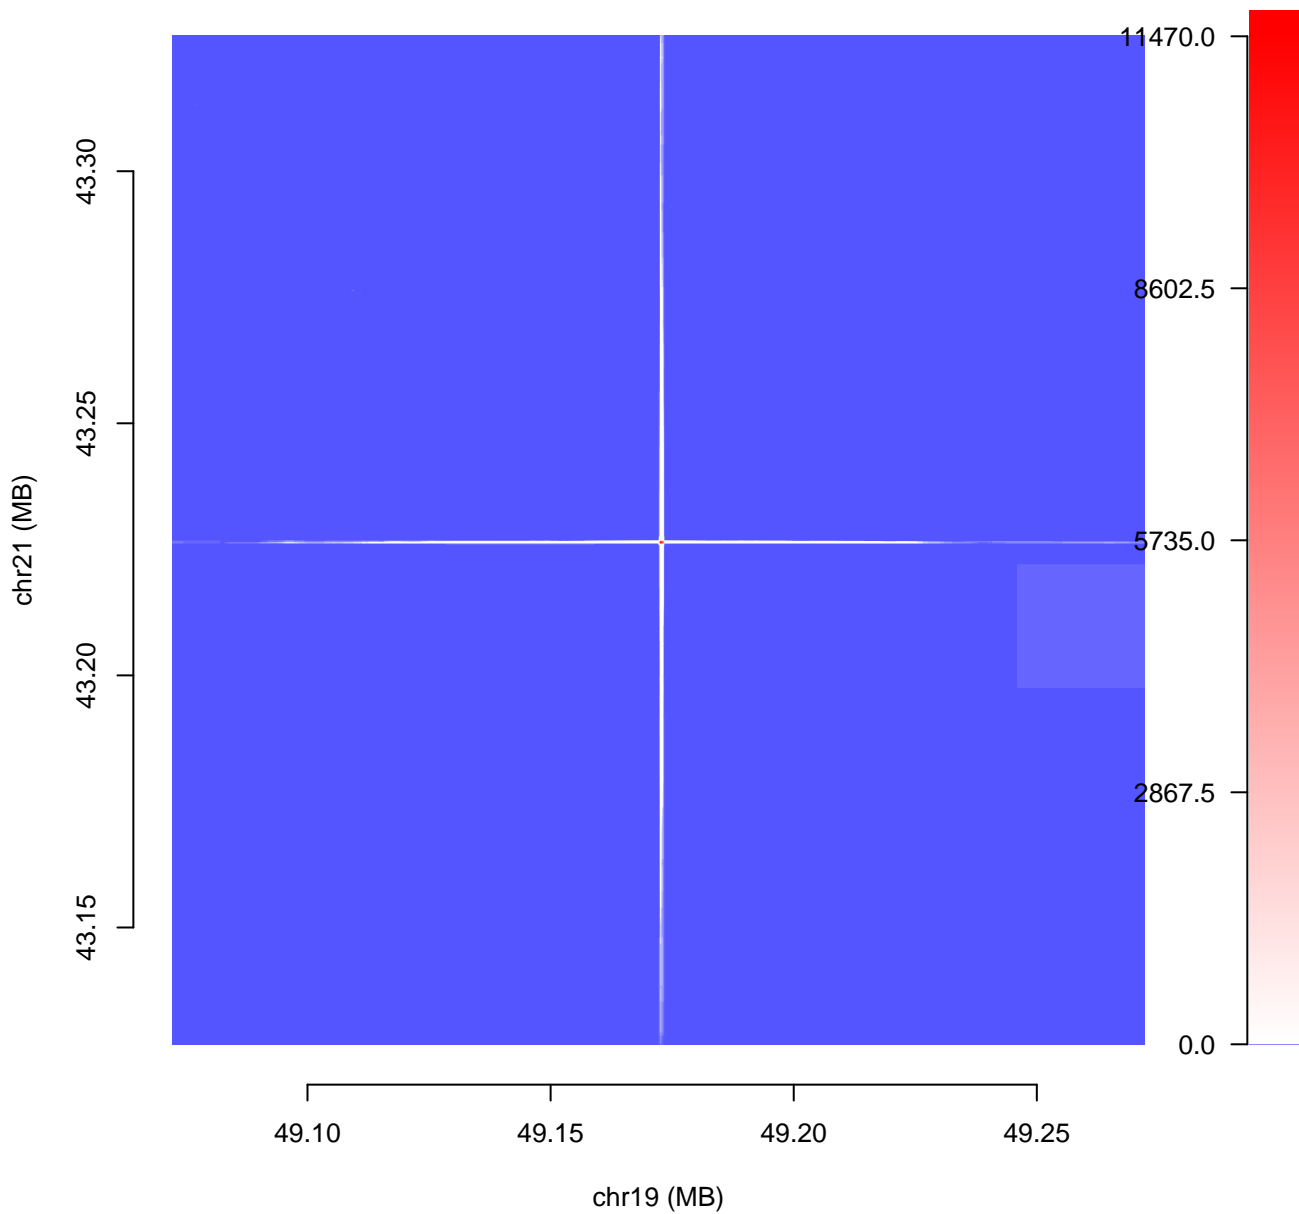

Supplement: Supplemental_Data.zip [file event_541.pdf › event_541.pdf]

Barcode

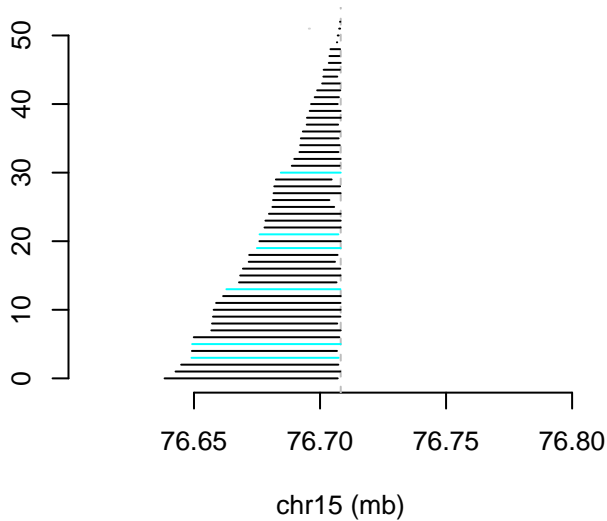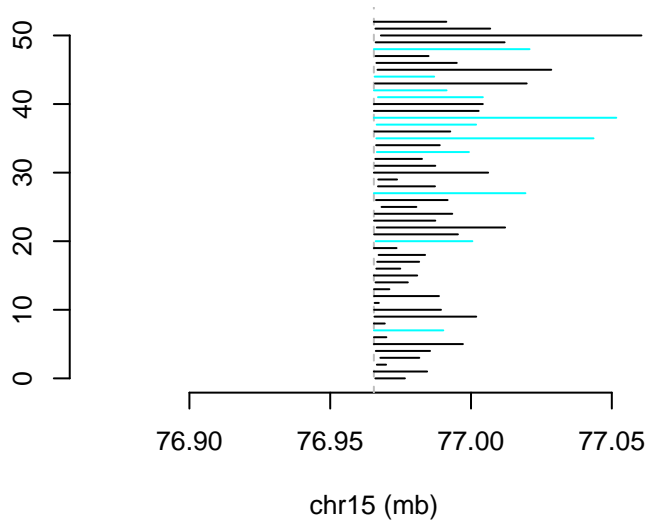

Copy number

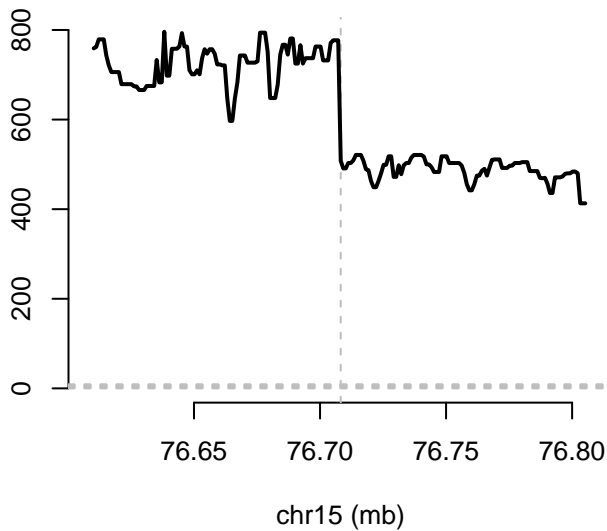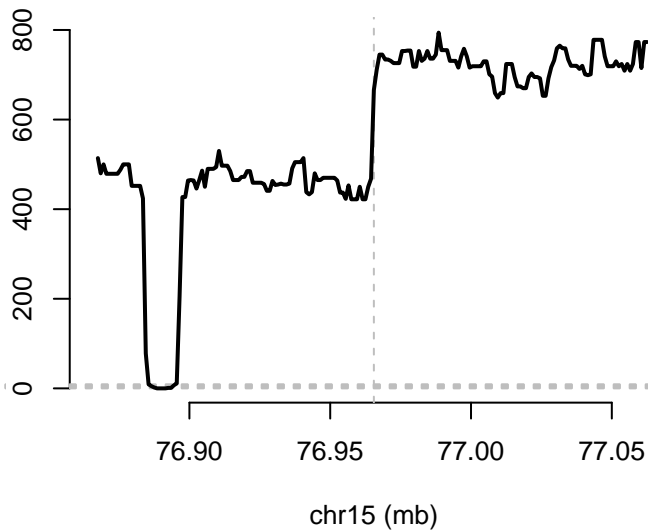

K562 chr15:76,965,508::chr15:76,708,216-+

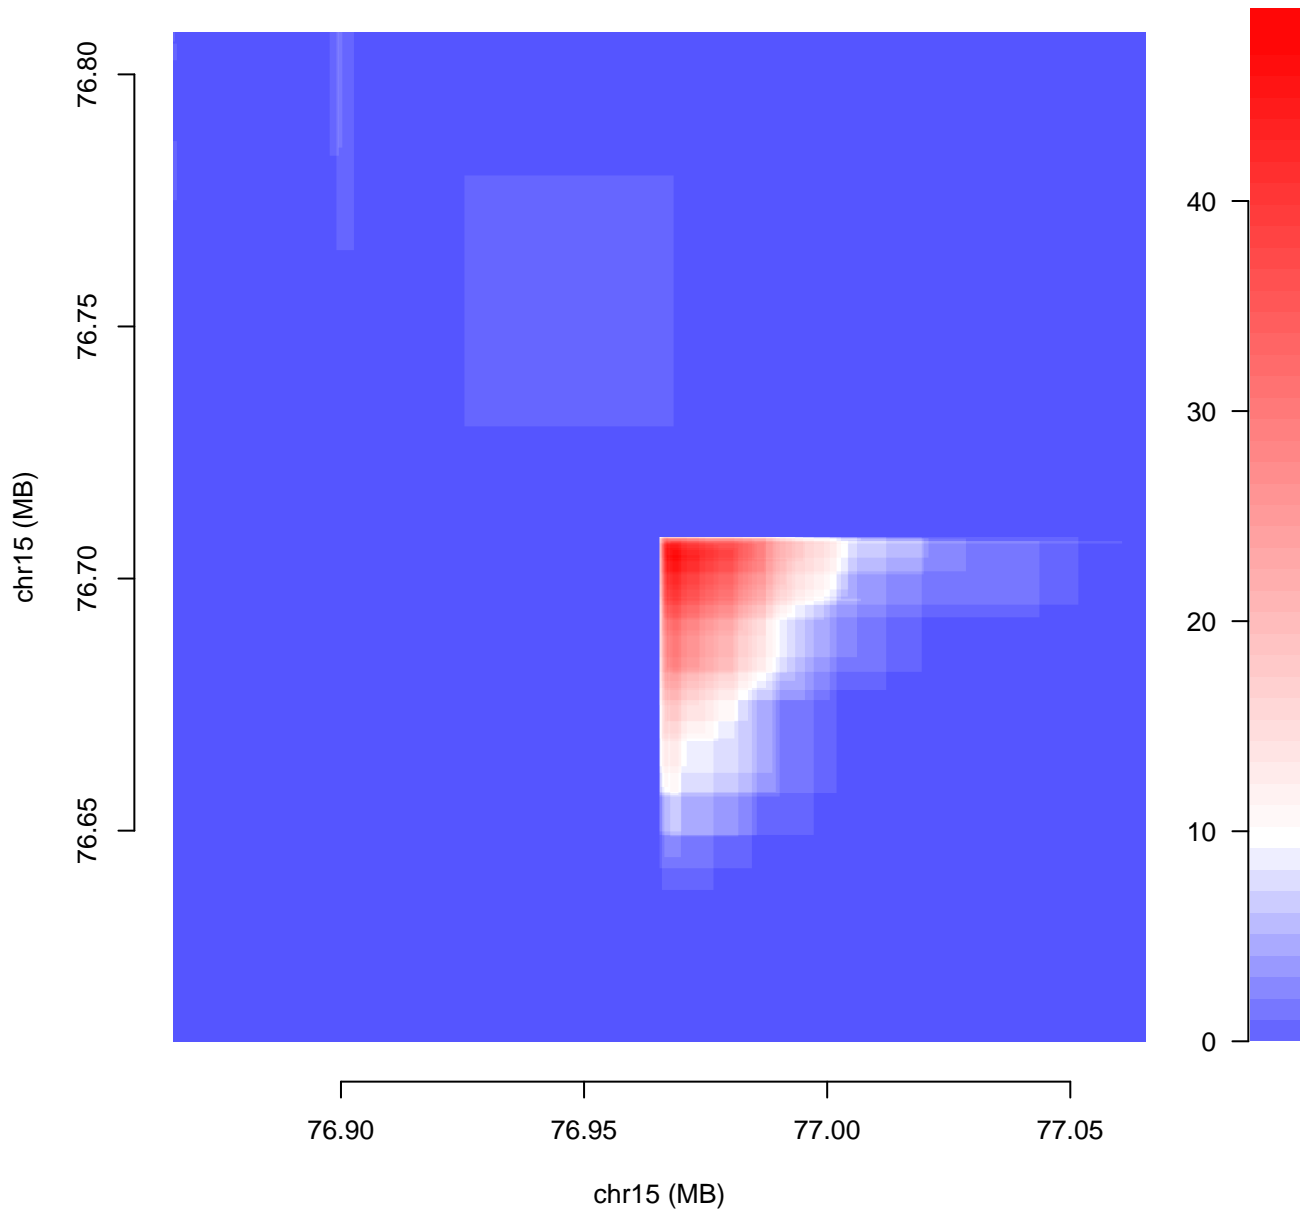

Supplement: Supplemental_Data.zip [file event_542.pdf › event_542.pdf]

Barcode

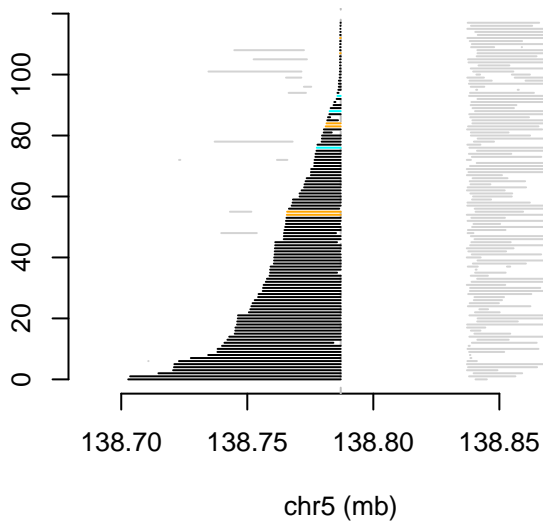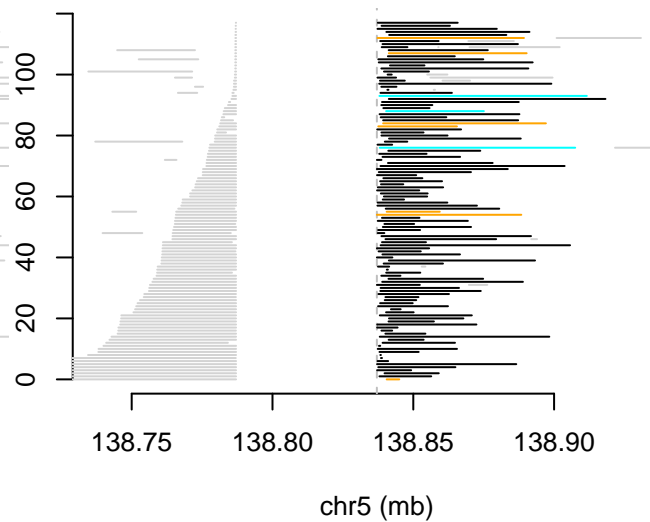

Copy number

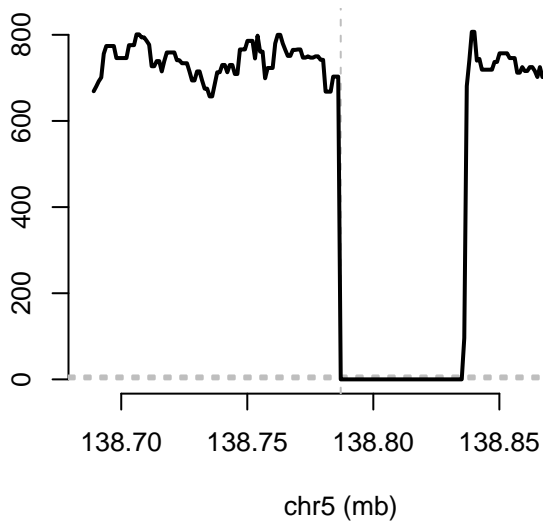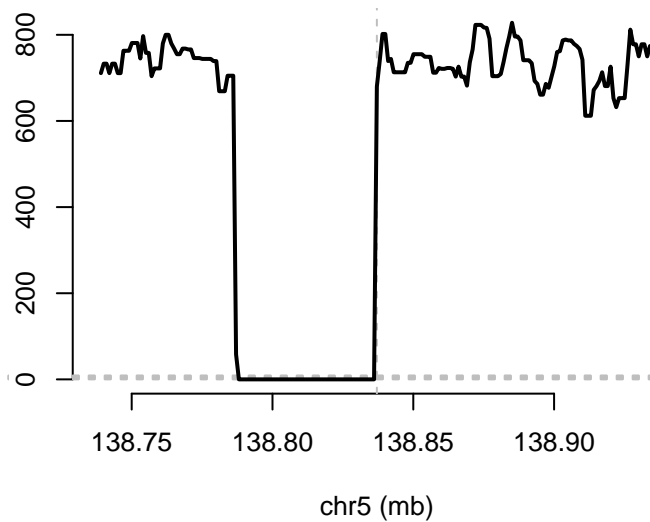

K562 chr5:138,787,075::chr5:138,837,071+-

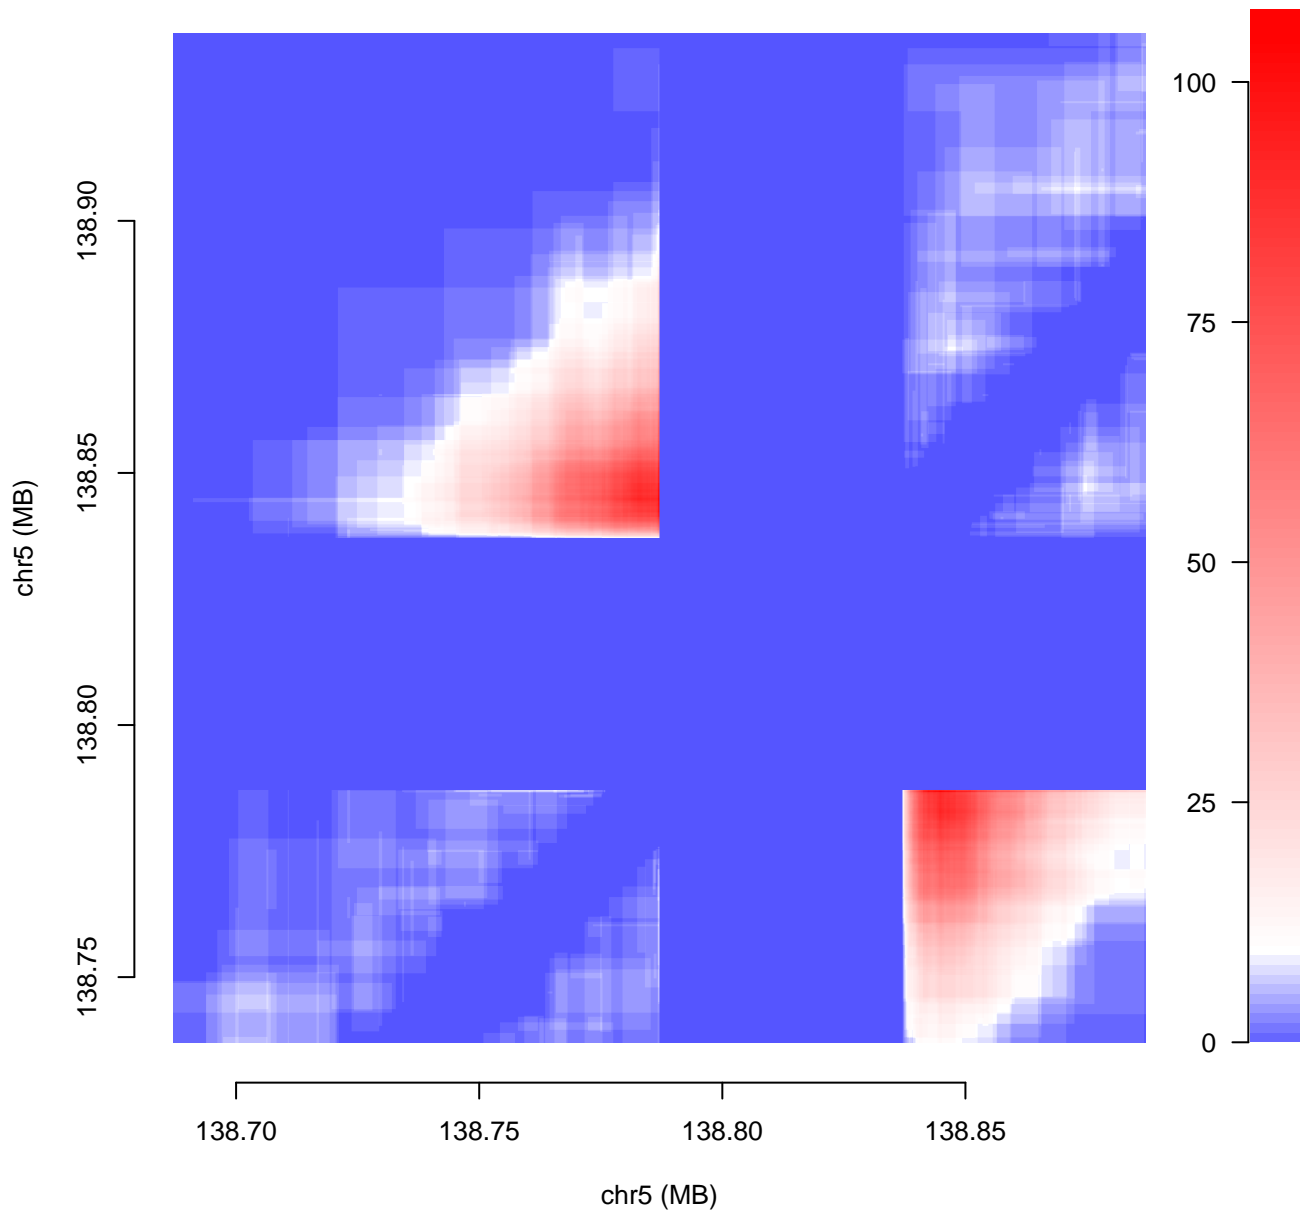

Supplement: Supplemental_Data.zip [file event_543.pdf › event_543.pdf]

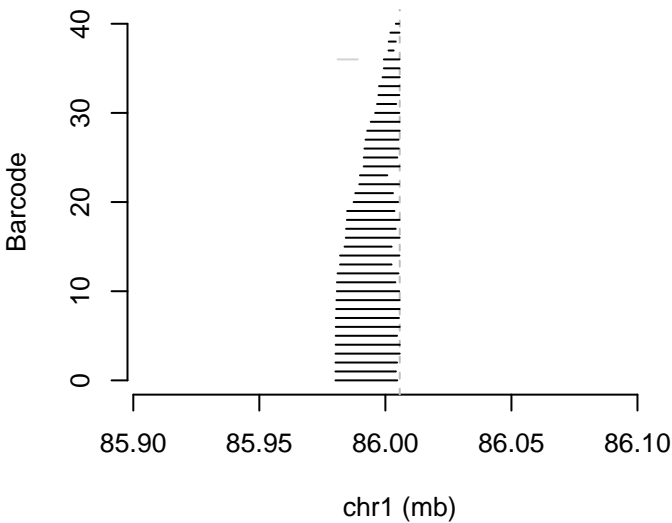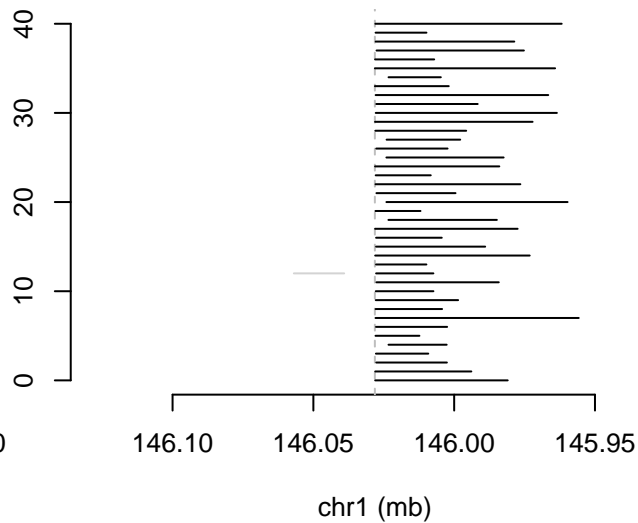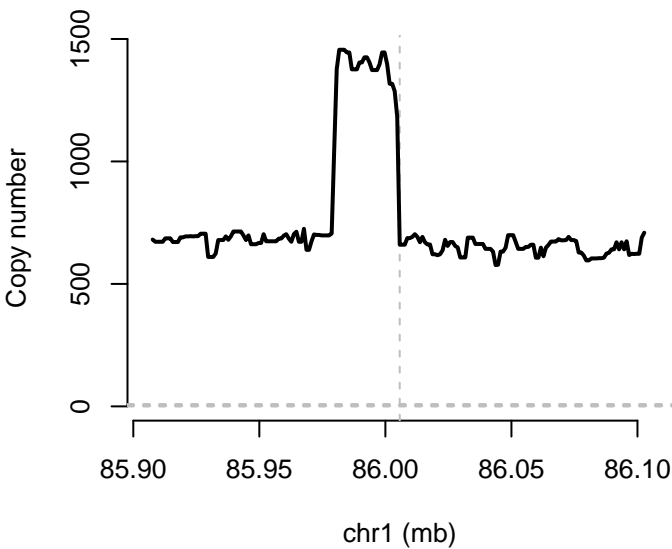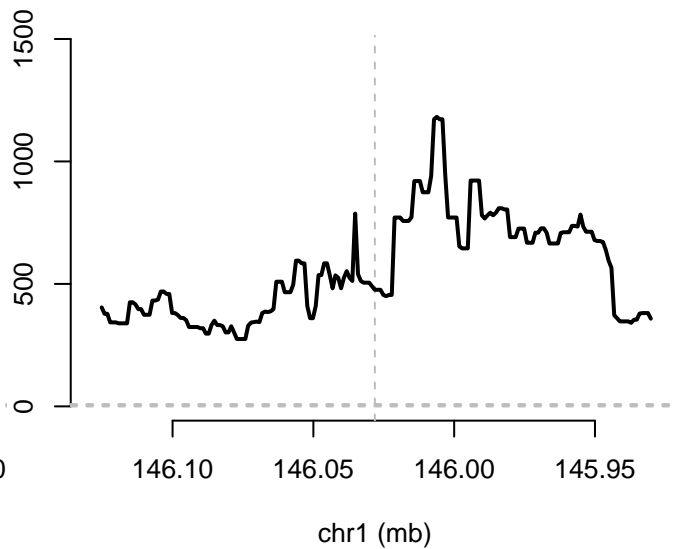

K562 chr1:86,005,697::chr1:146,028,157++

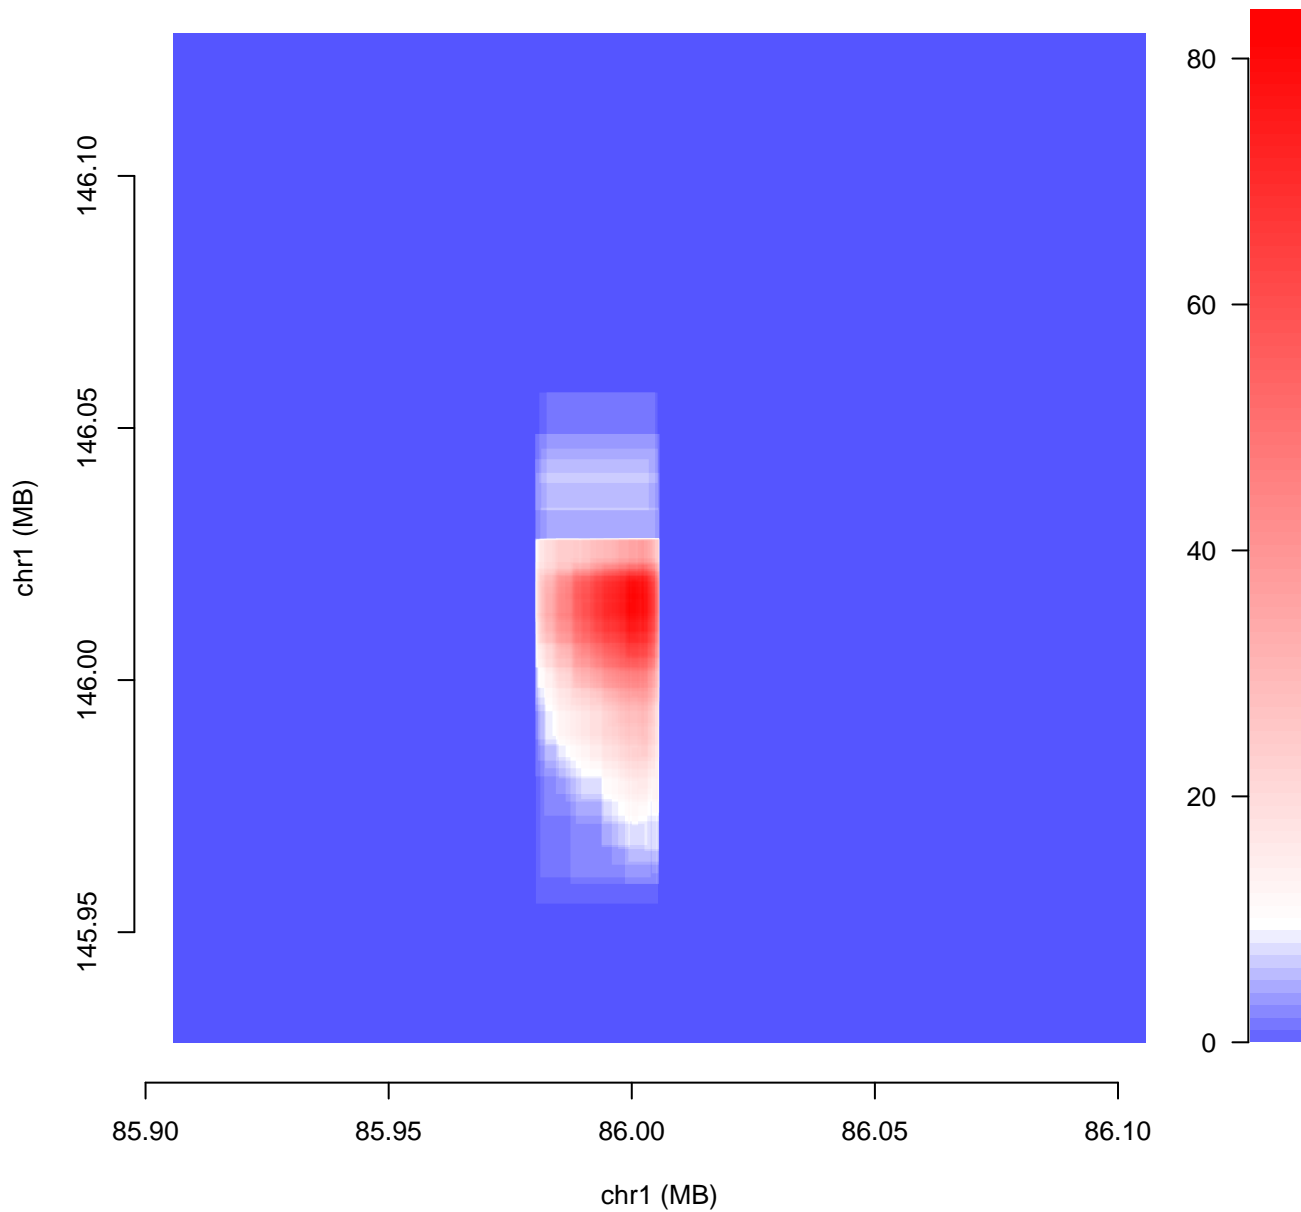

Supplement: Supplemental_Data.zip [file event_544.pdf › event_544.pdf]

Barcode

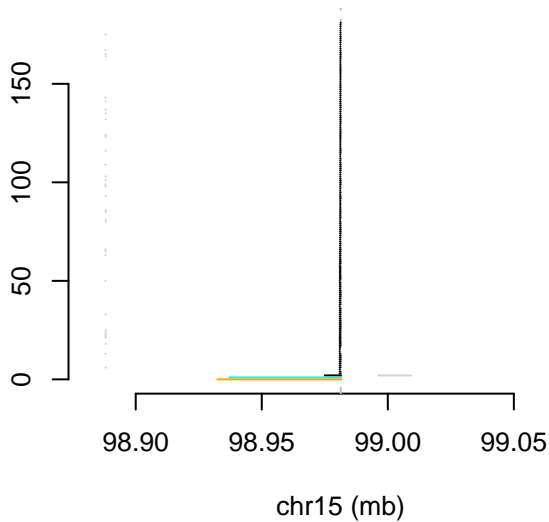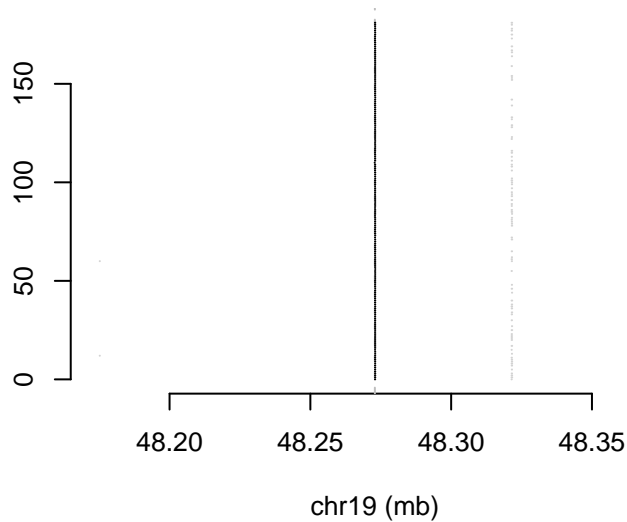

Copy number

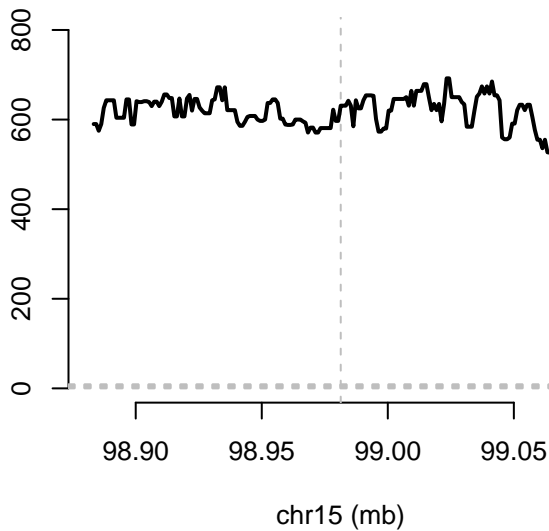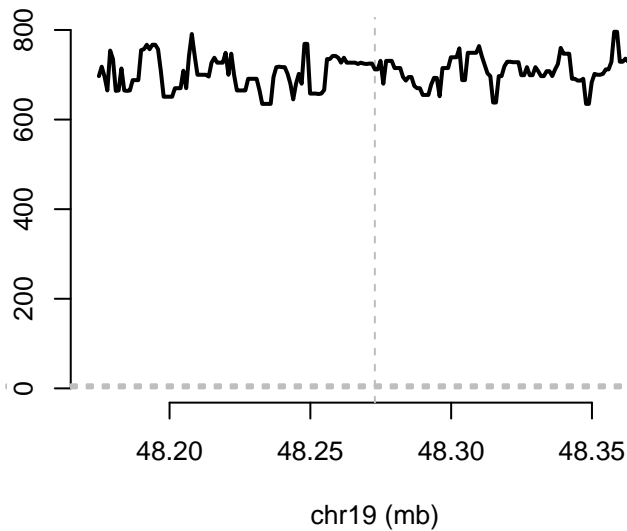

K562 chr19:48,272,906::chr15:98,981,330-+

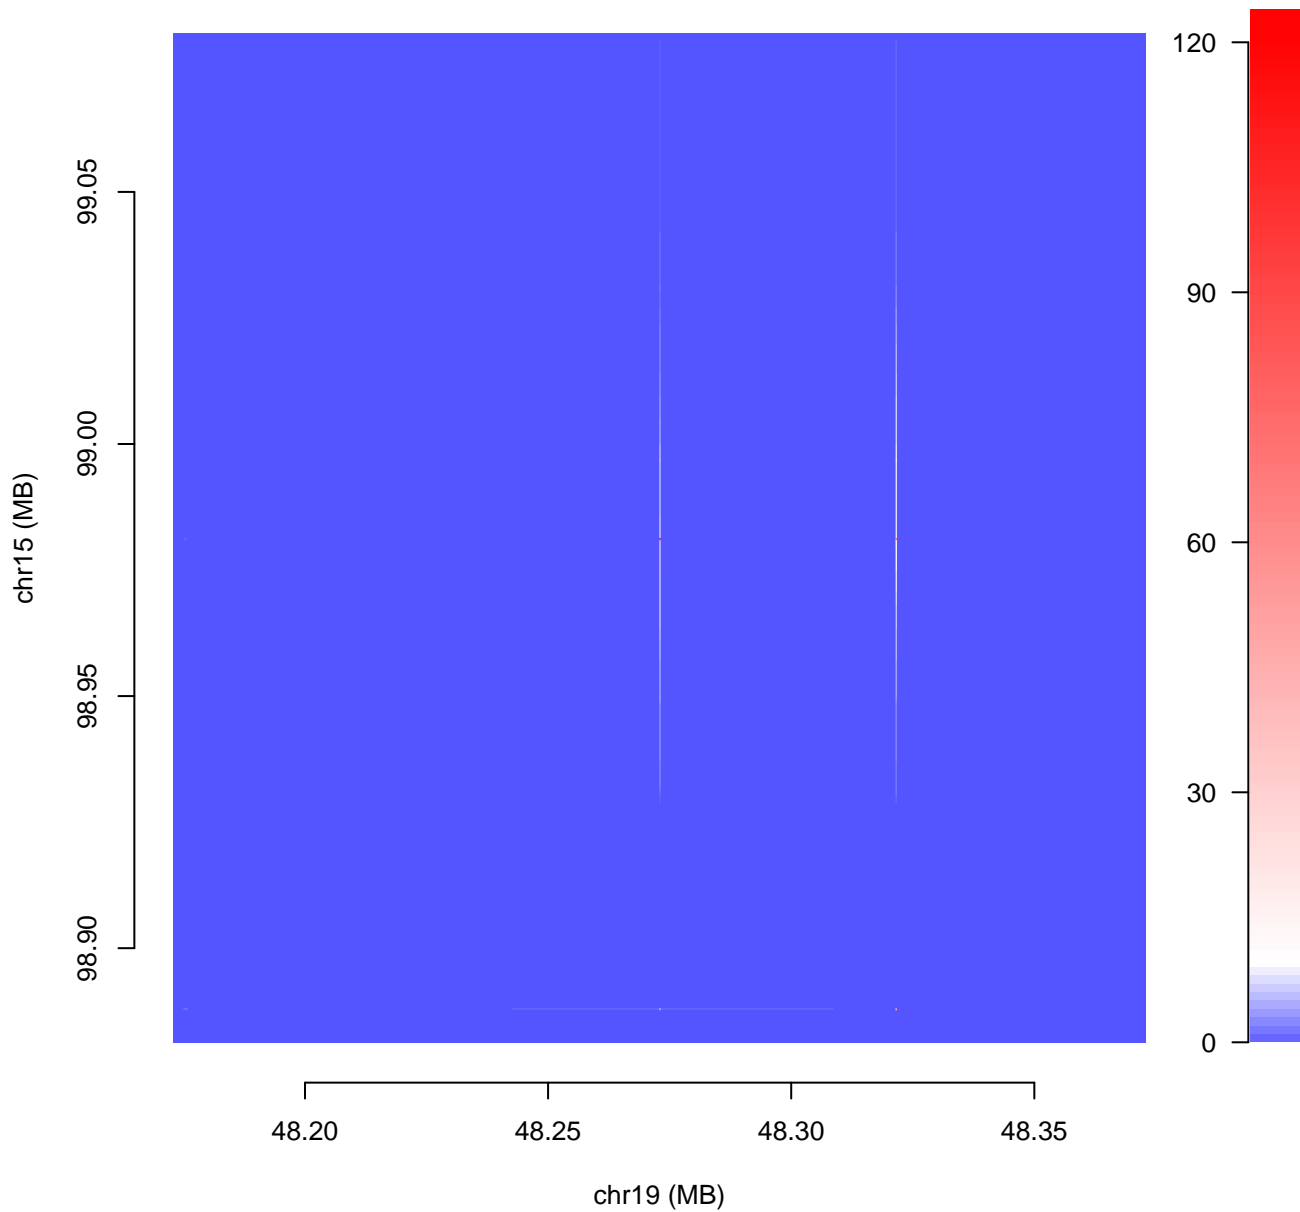

Supplement: Supplemental_Data.zip [file event_545.pdf › event_545.pdf]

Barcode

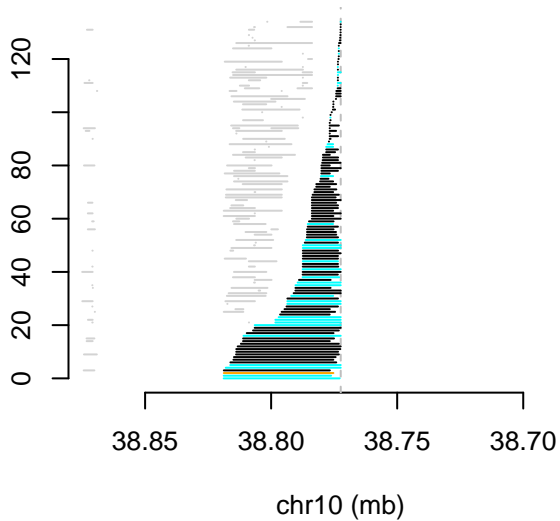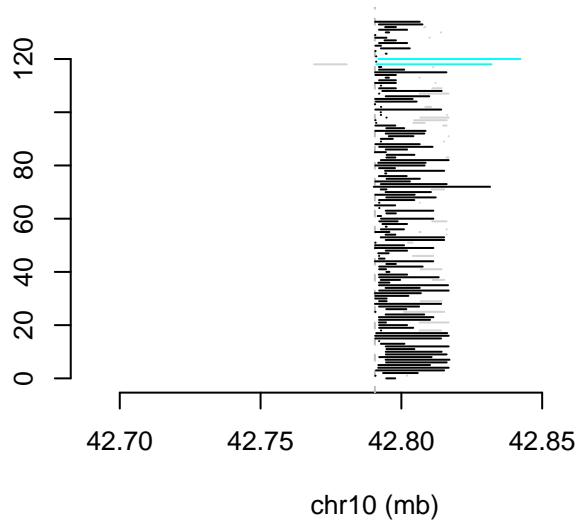

Copy number

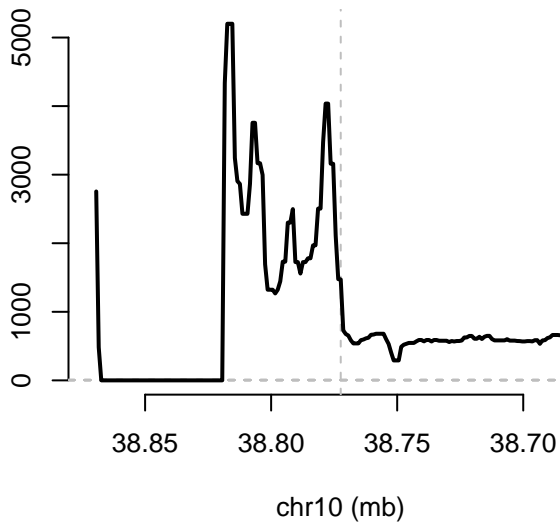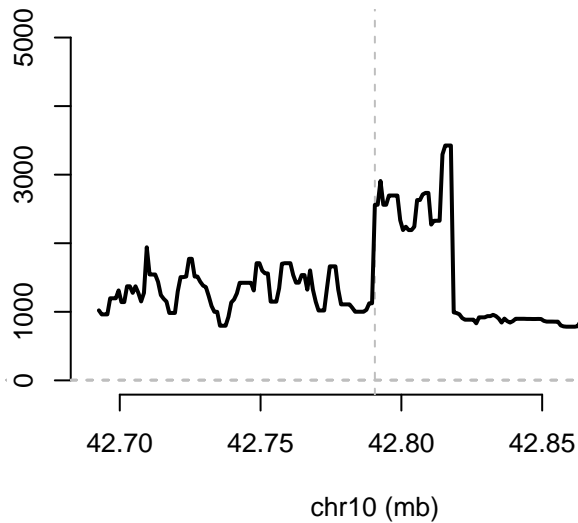

K562 chr10:38,772,391::chr10:42,790,593--

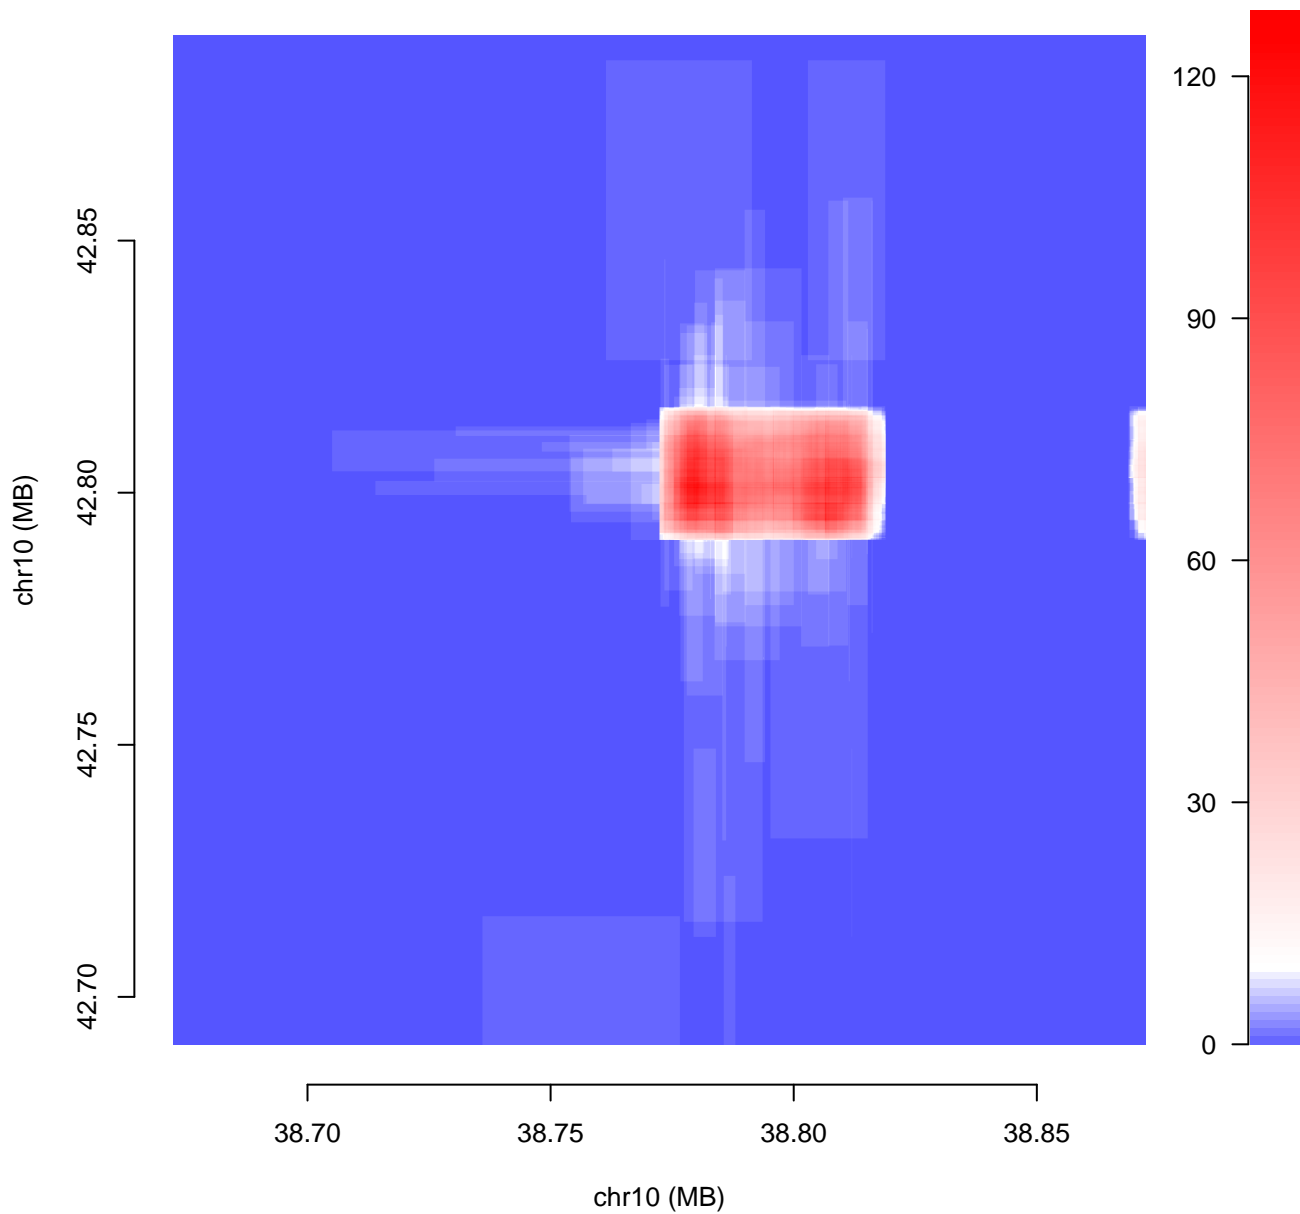

Supplement: Supplemental_Data.zip [file event_546.pdf › event_546.pdf]

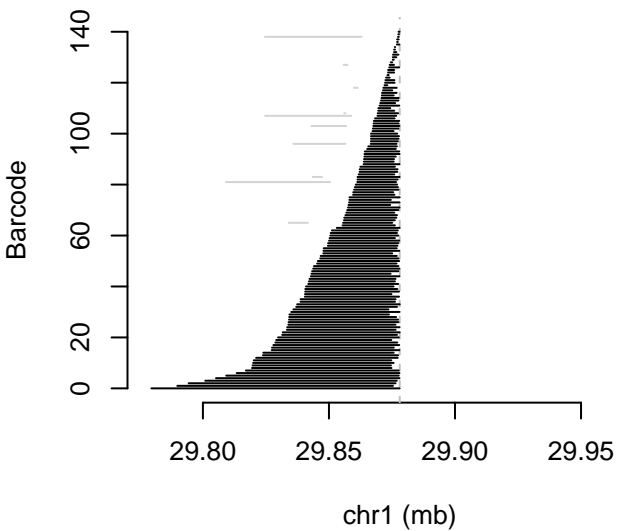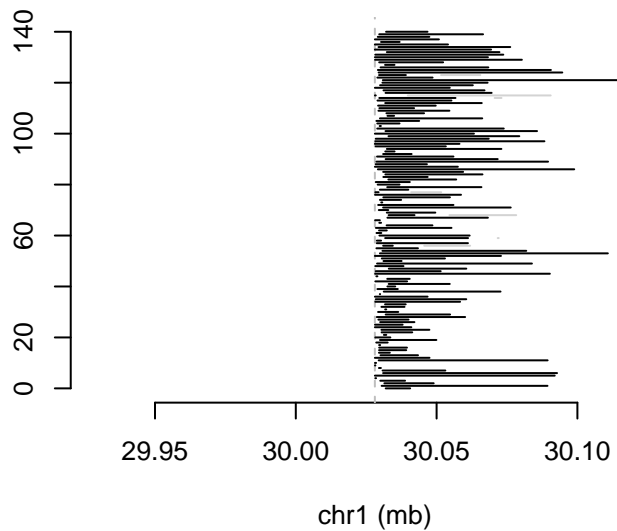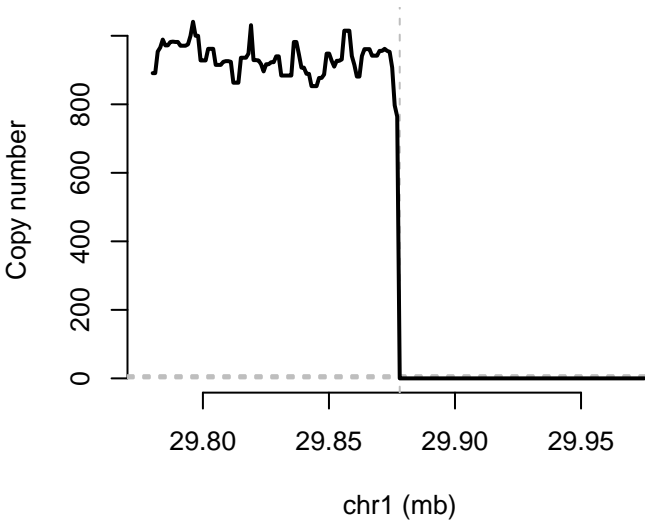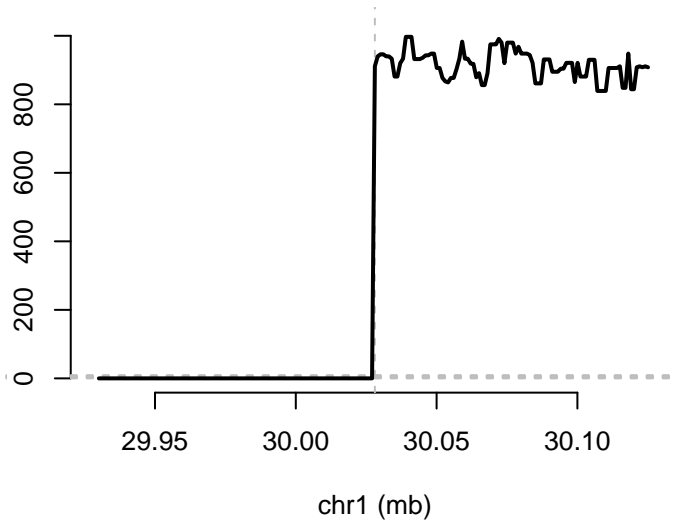

K562 chr1:30,028,081::chr1:29,878,082--+

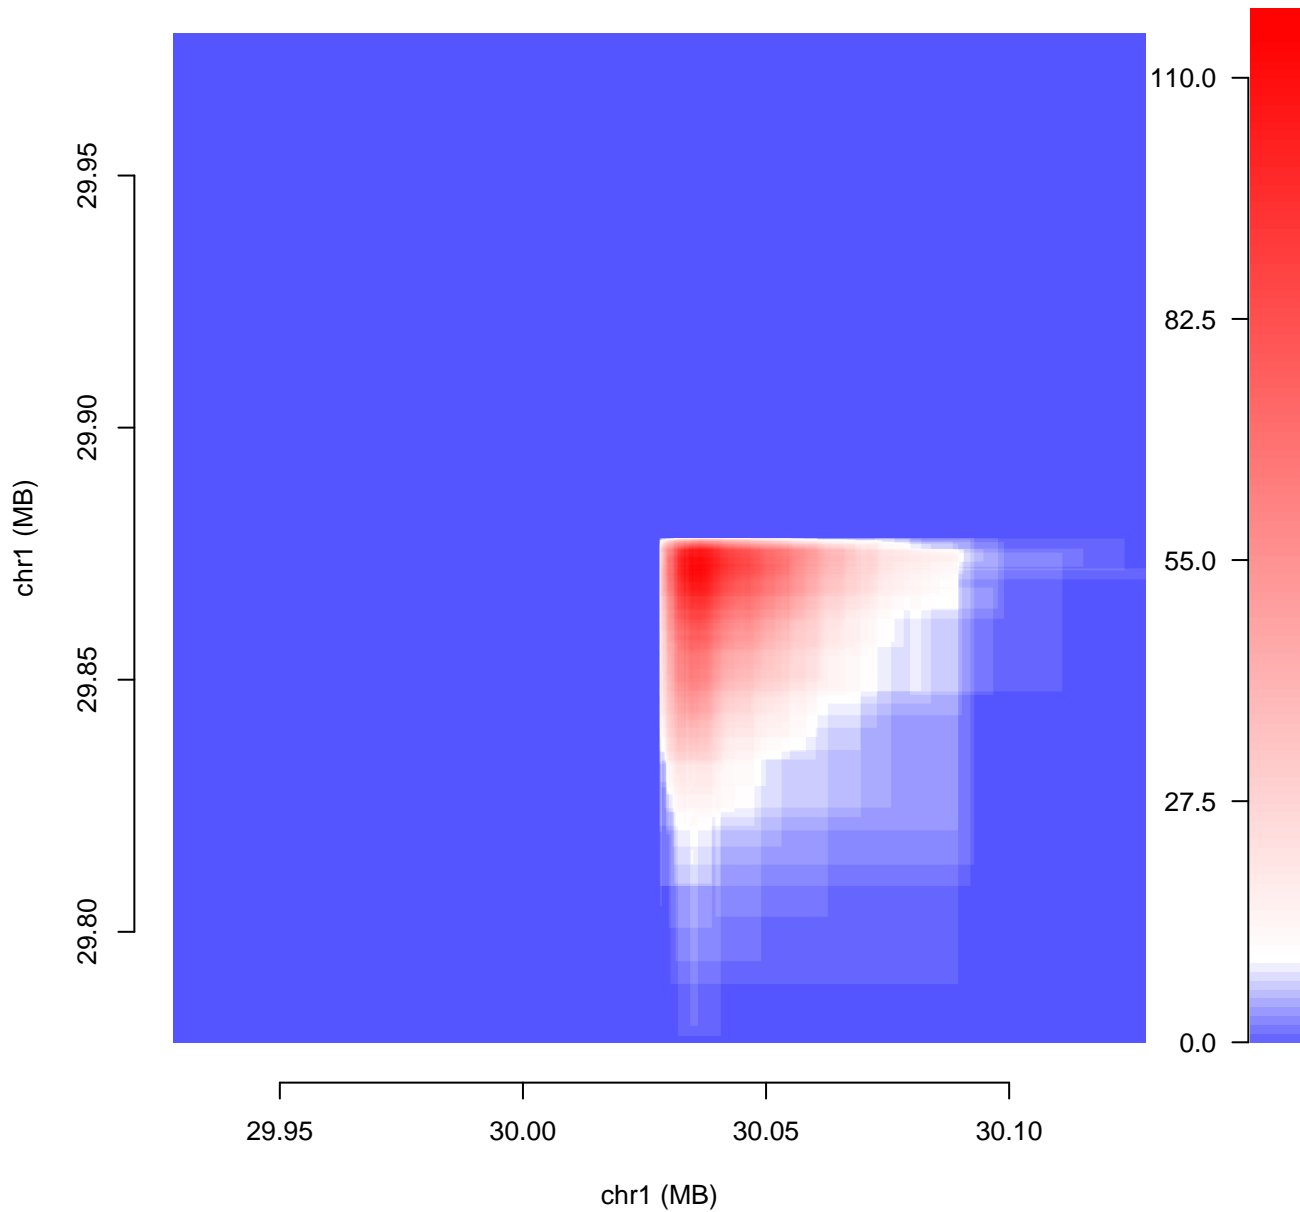

Supplement: Supplemental_Data.zip [file event_547.pdf › event_547.pdf]

Barcode

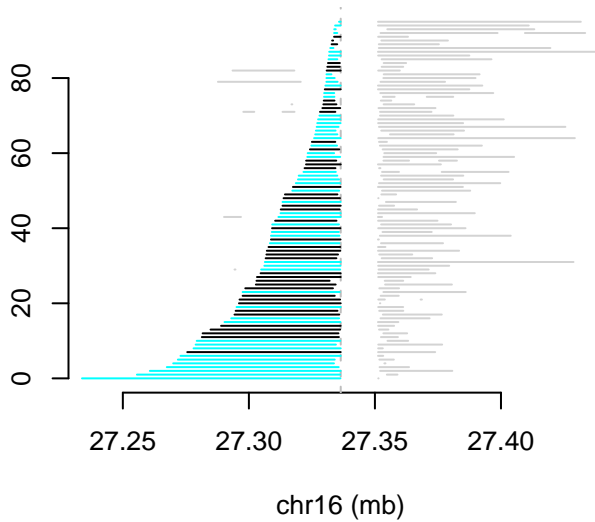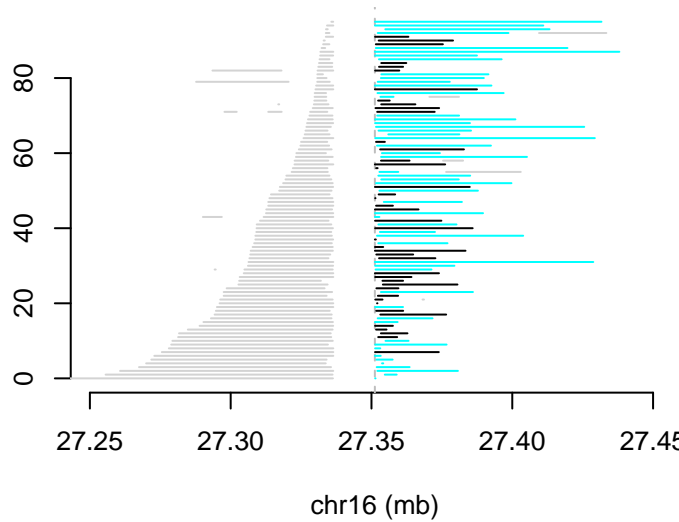

Copy number

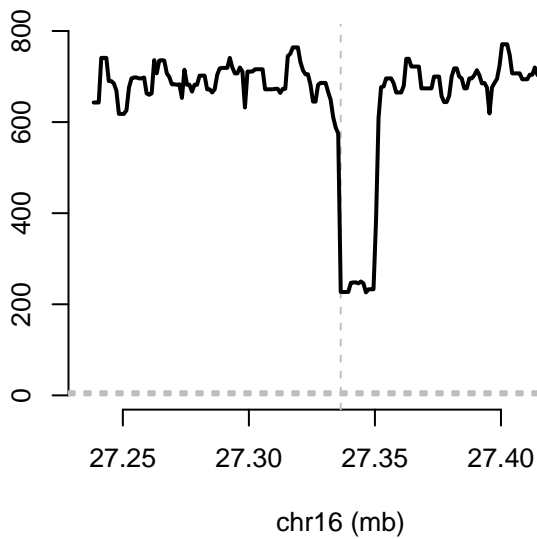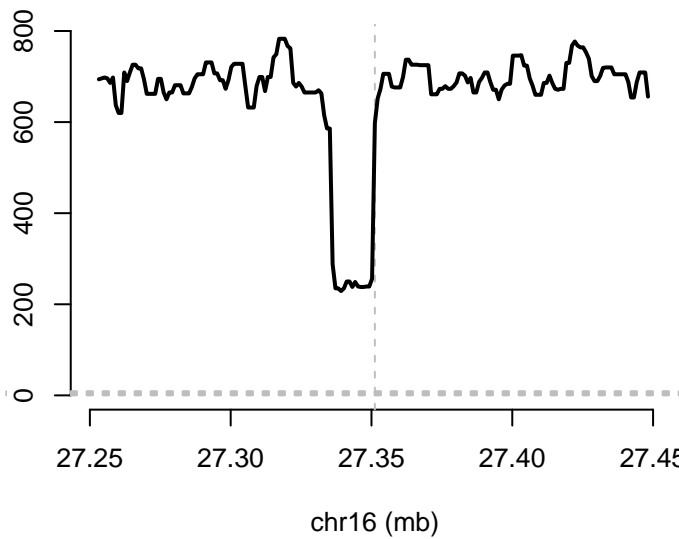

K562 chr16:27,336,438::chr16:27,351,202+-

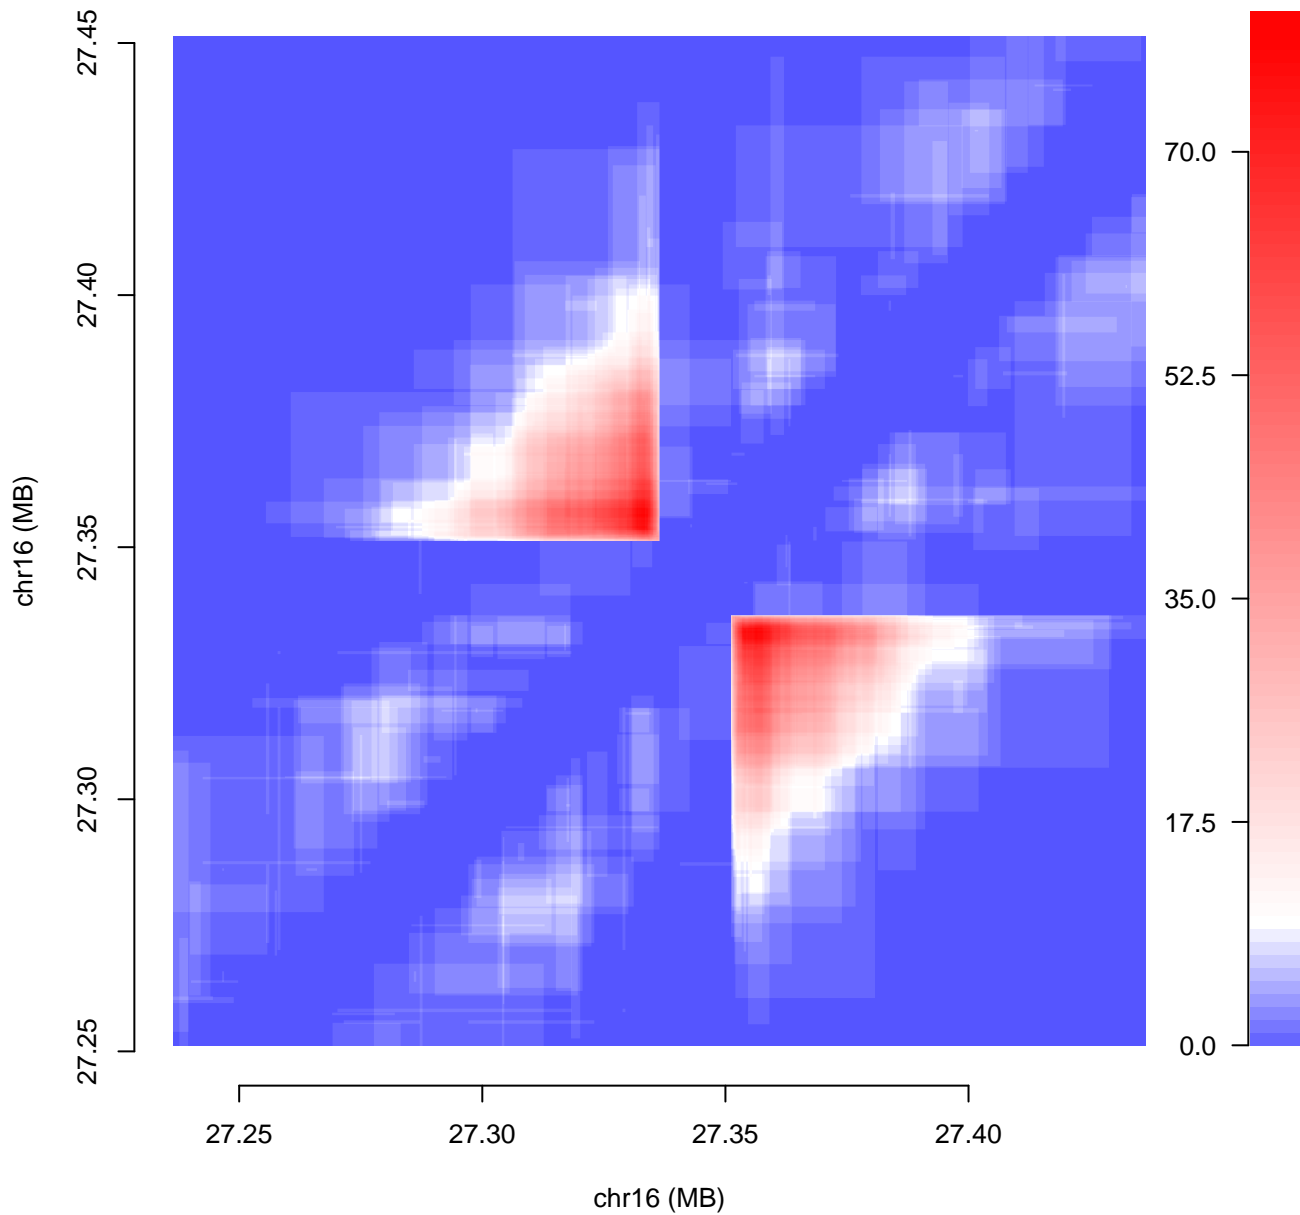

Supplement: Supplemental_Data.zip [file event_548.pdf › event_548.pdf]

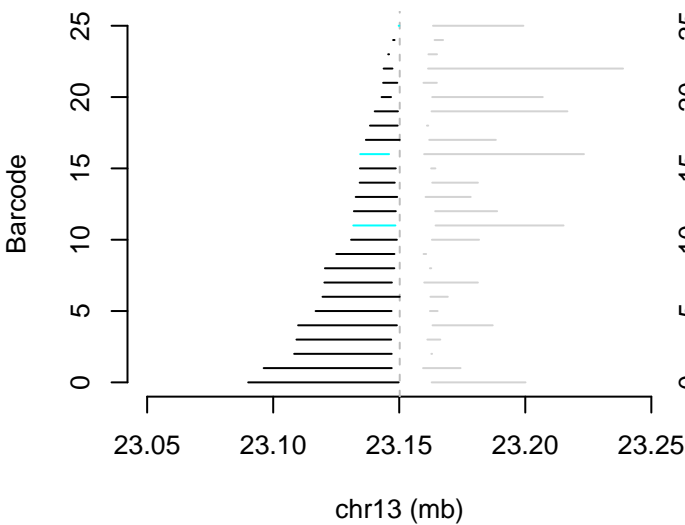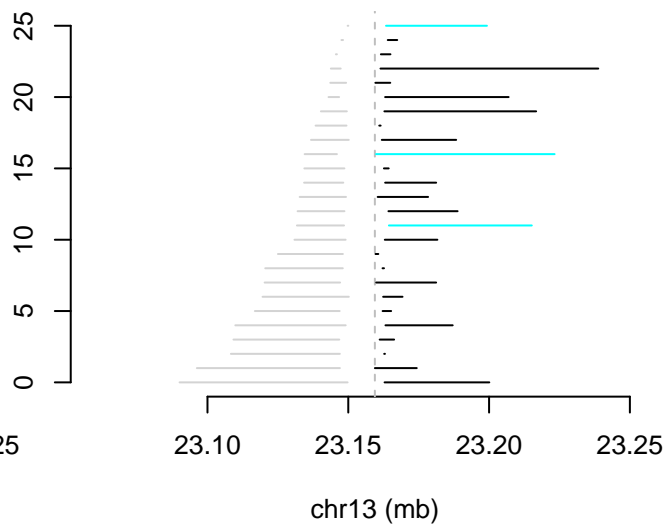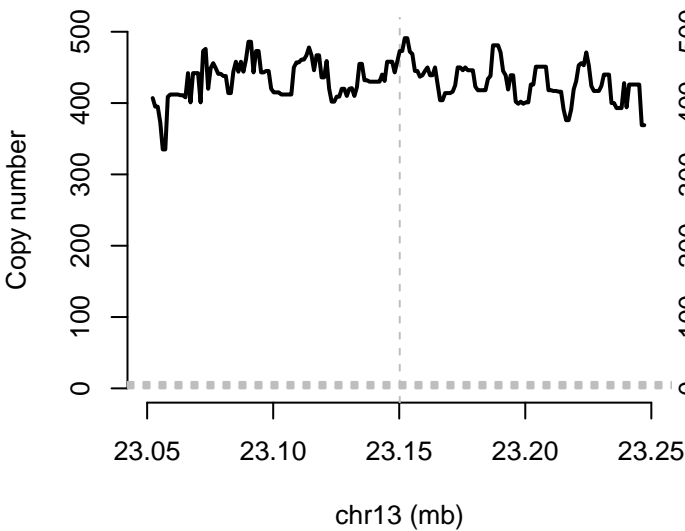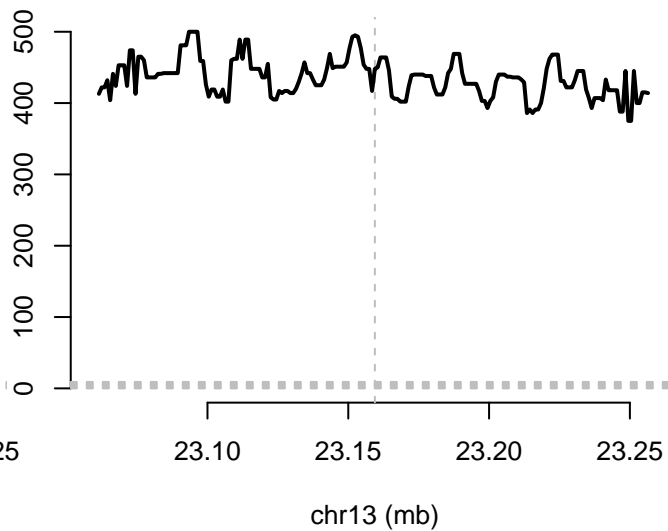

K562 chr13:23,159,444::chr13:23,150,200-+

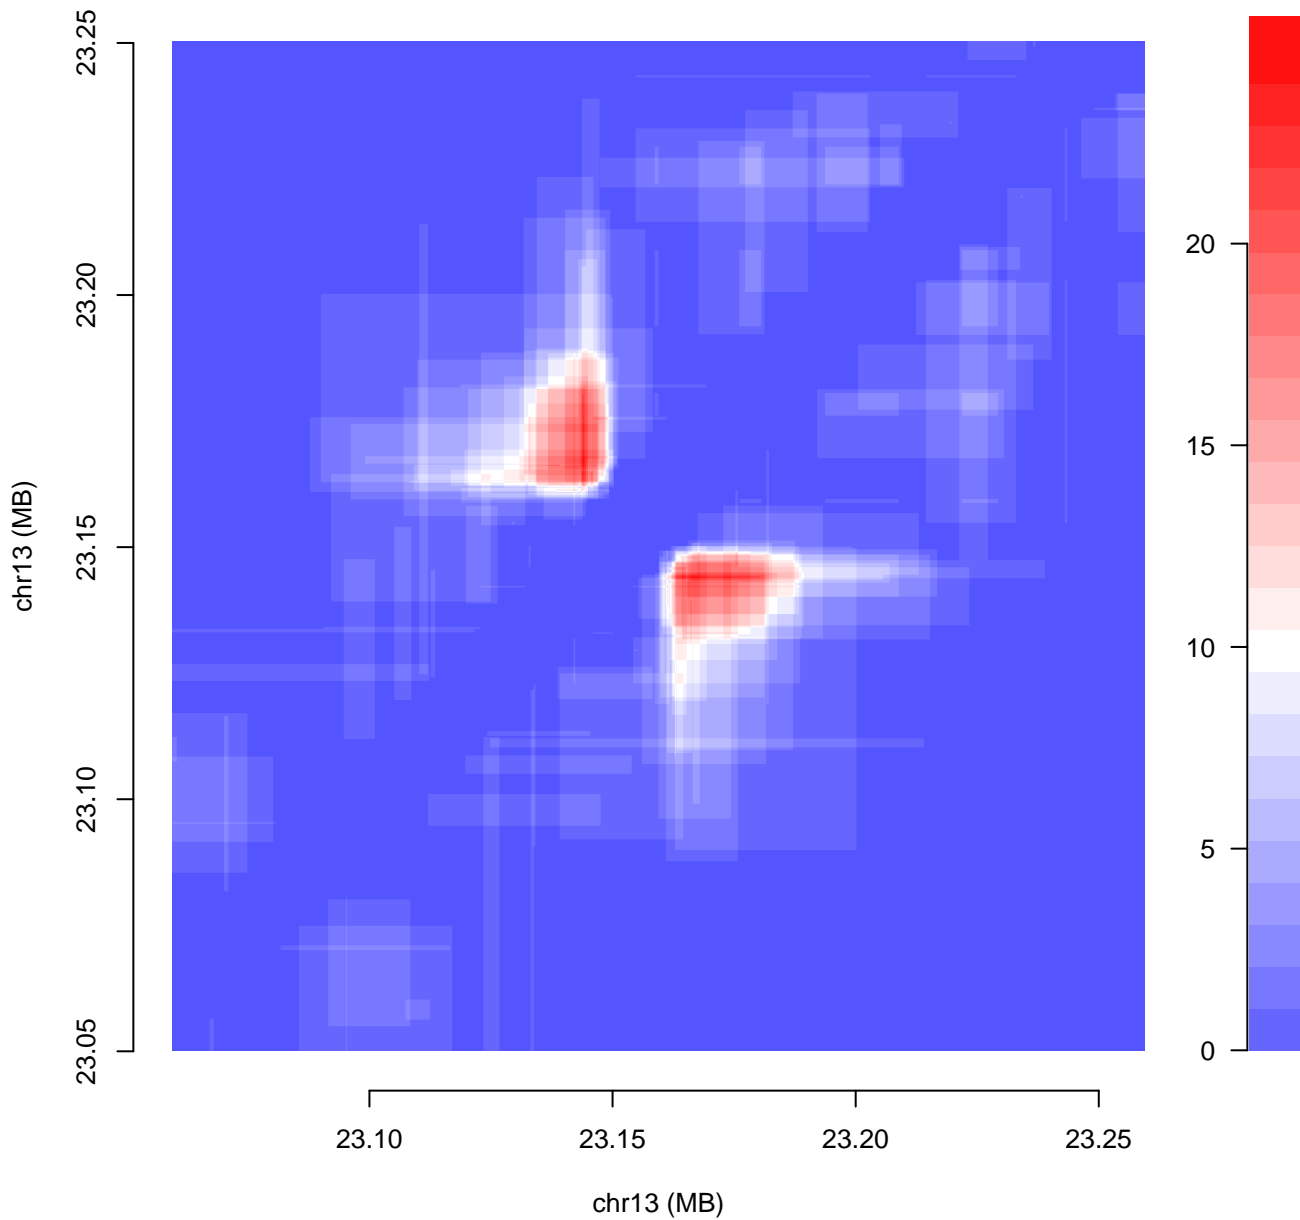

Supplement: Supplemental_Data.zip [file event_549.pdf › event_549.pdf]
