# Supplementary figures and images for: Comprehensive, integrated, and phased whole-genome analysis of the primary ENCODE cell line K562 (part 6 of 6)
Source: HighWire-hosted journal article supplement (doi:10.1101/gr.234948.118), 2019-02-08

Barcode

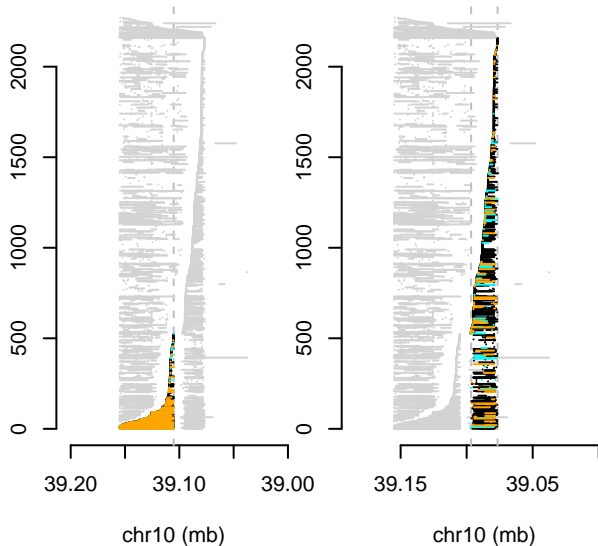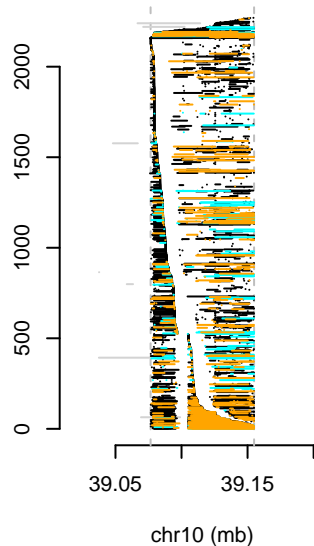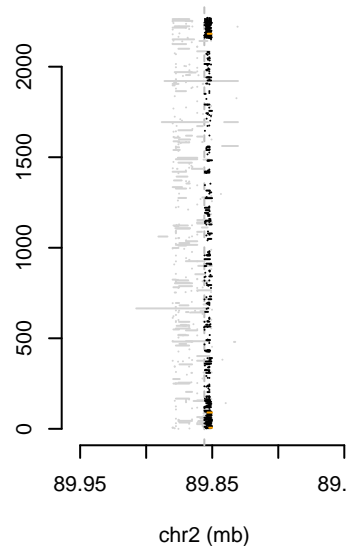

Copy number

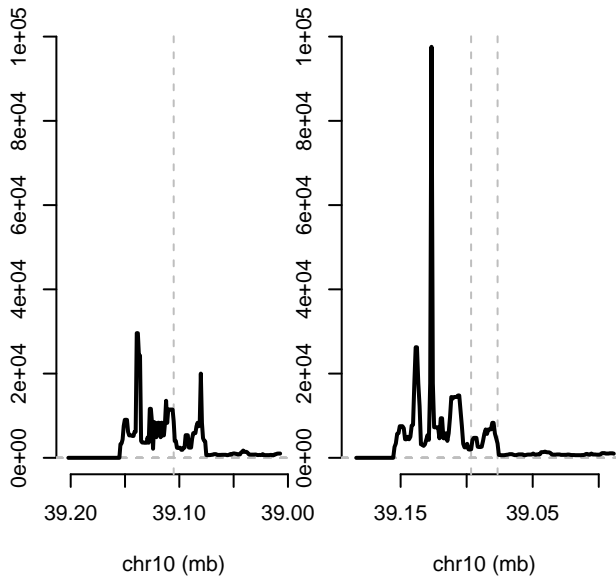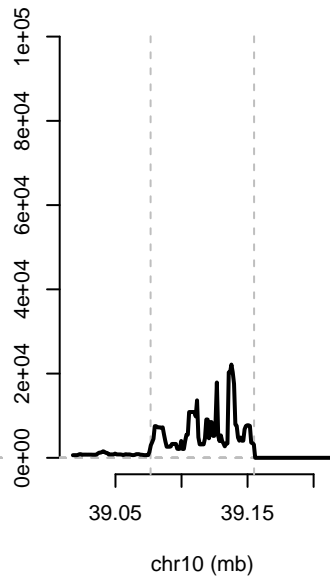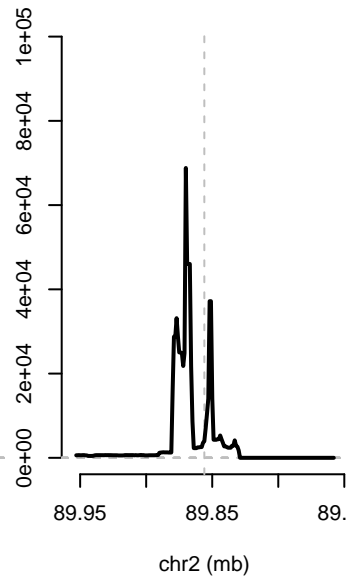

K562 chr10:39,105,190::chr10:39,096,636-+

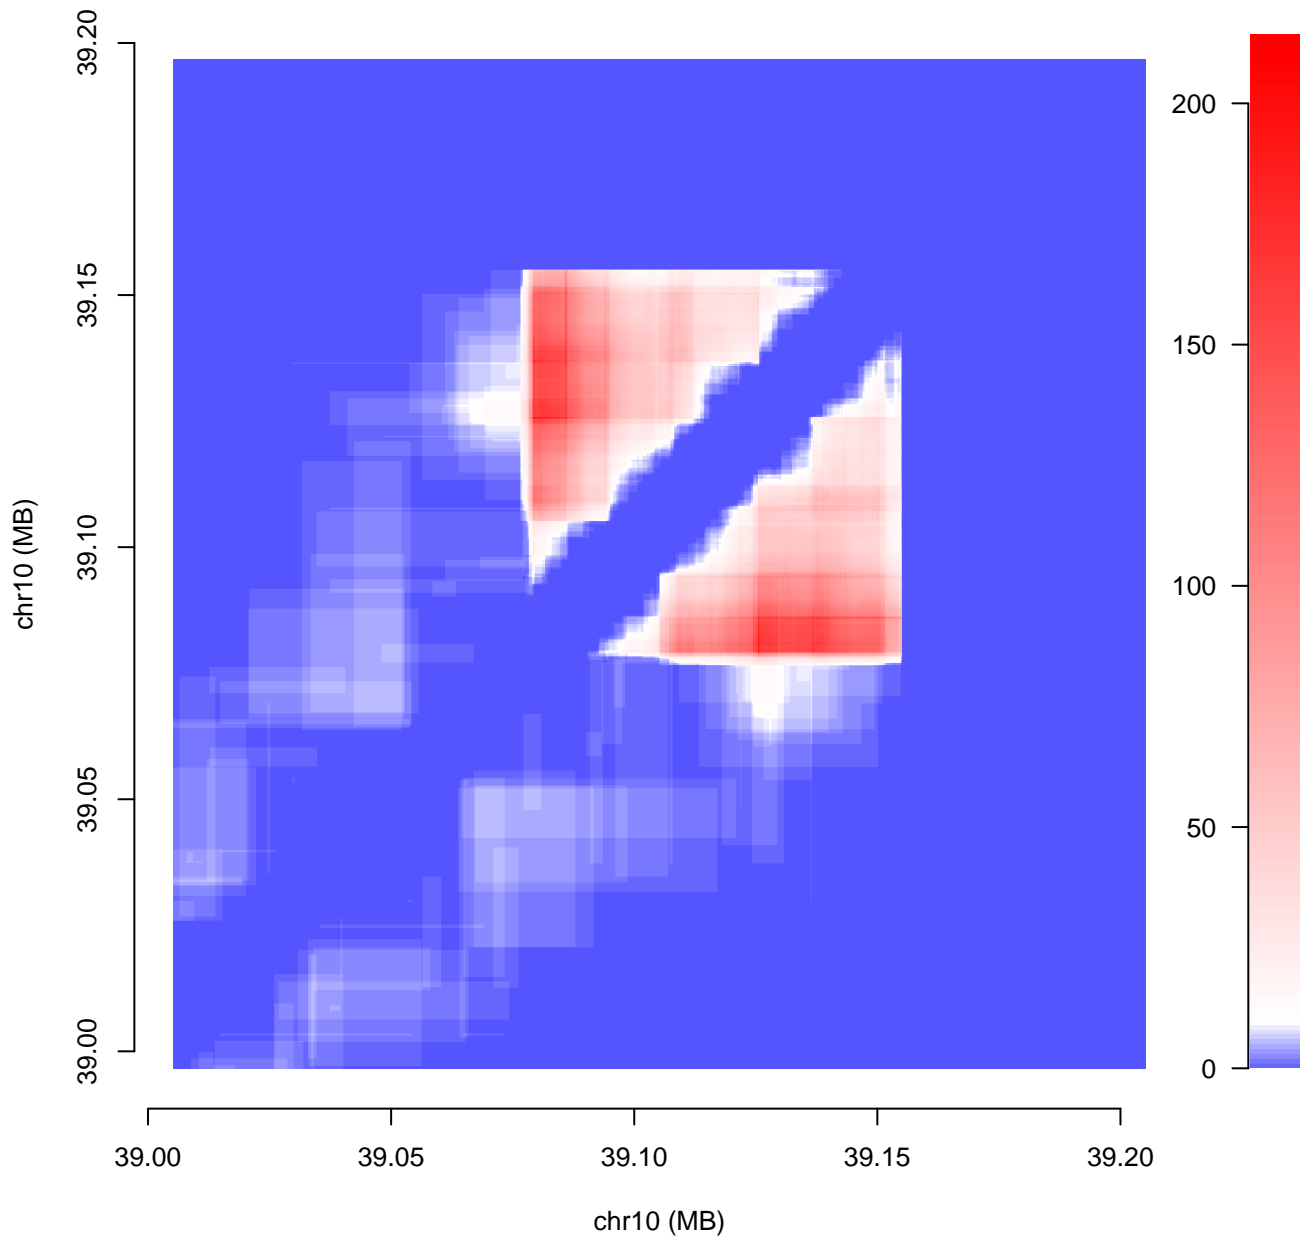

K562 chr10:39,076,596::chr10:39,154,935-+

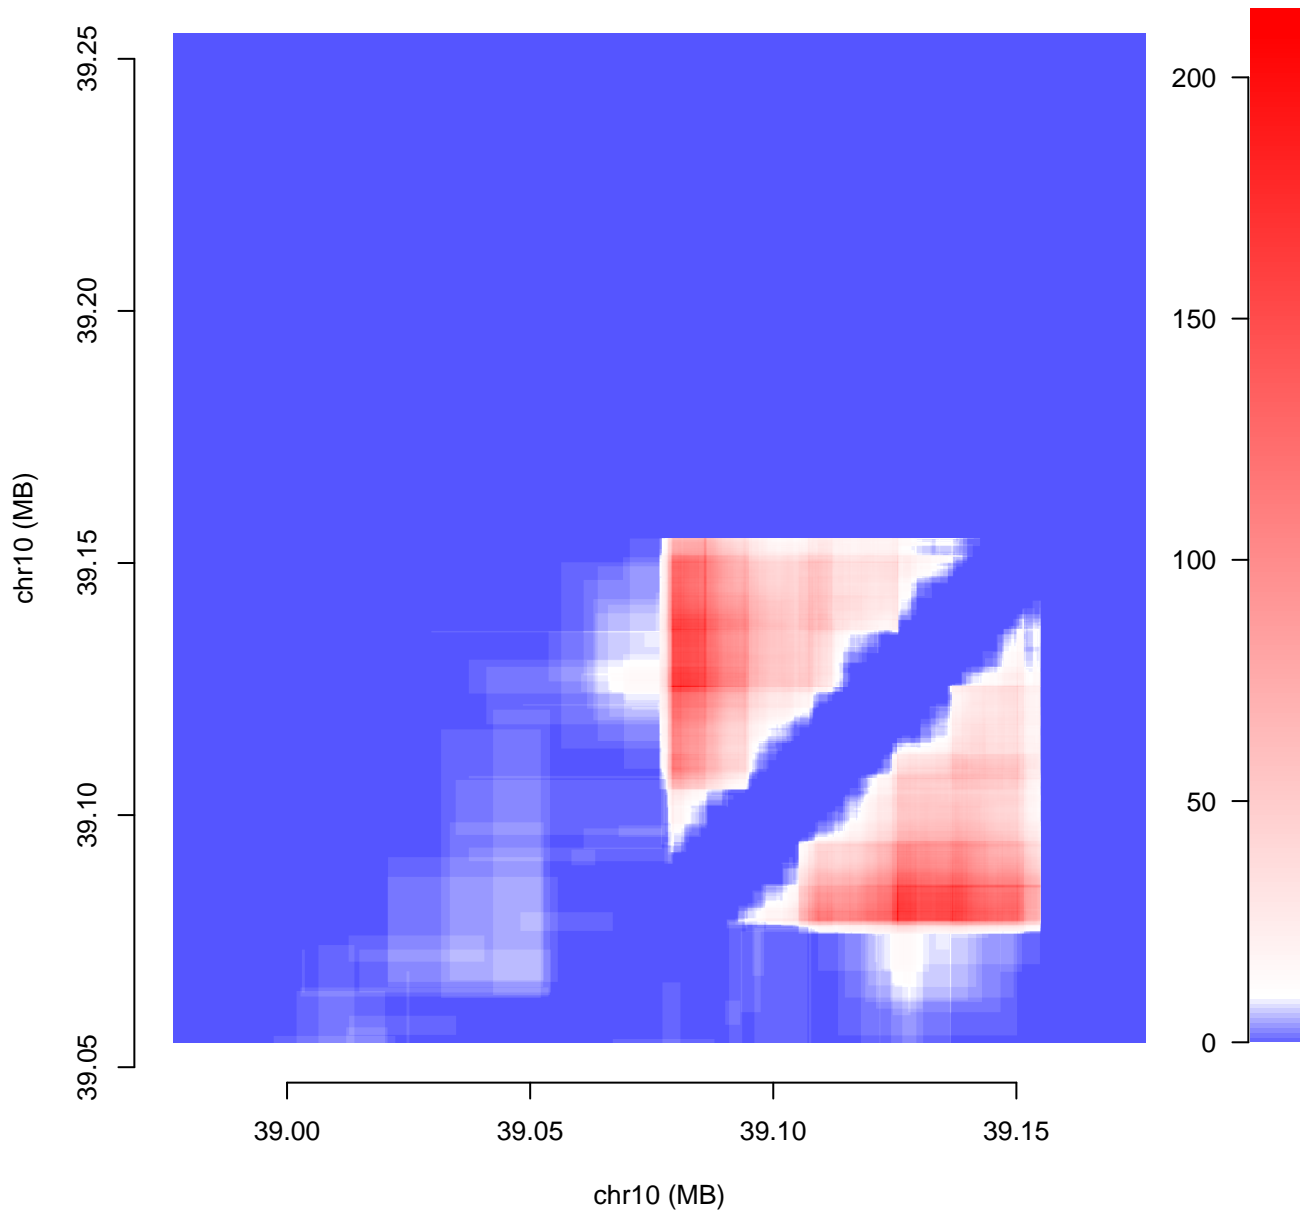

K562 chr10:39,076,596::chr10:39,096,636—+

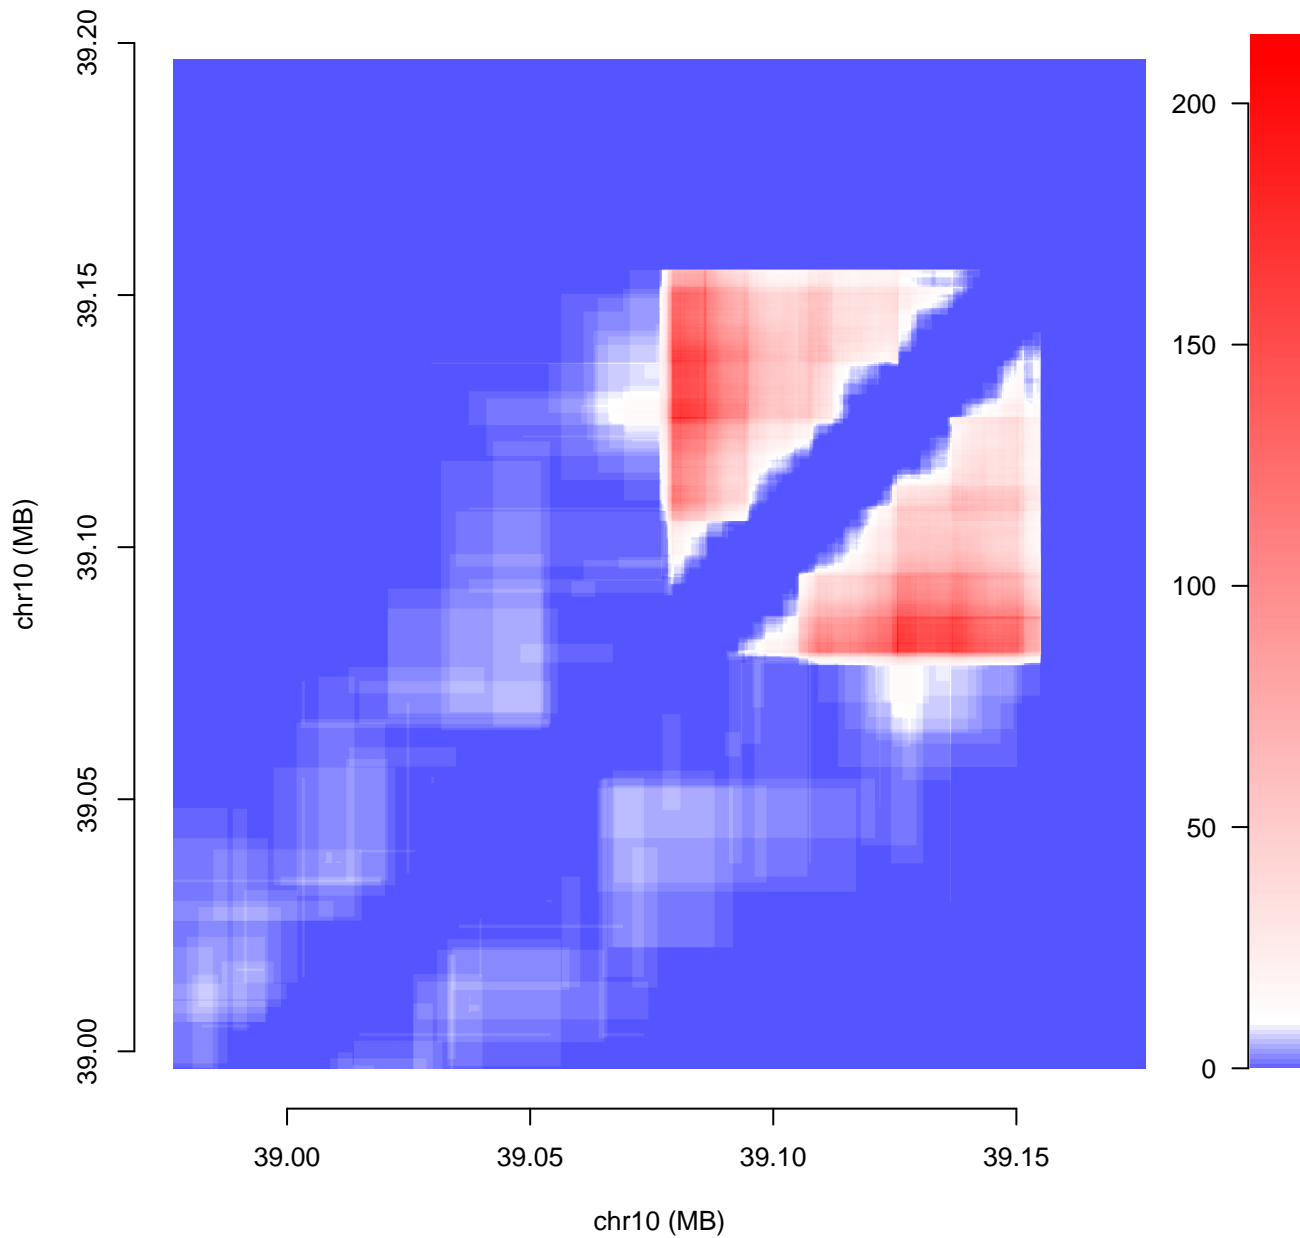

**K562 chr10:39,076,596::chrY:13,869,890-+**

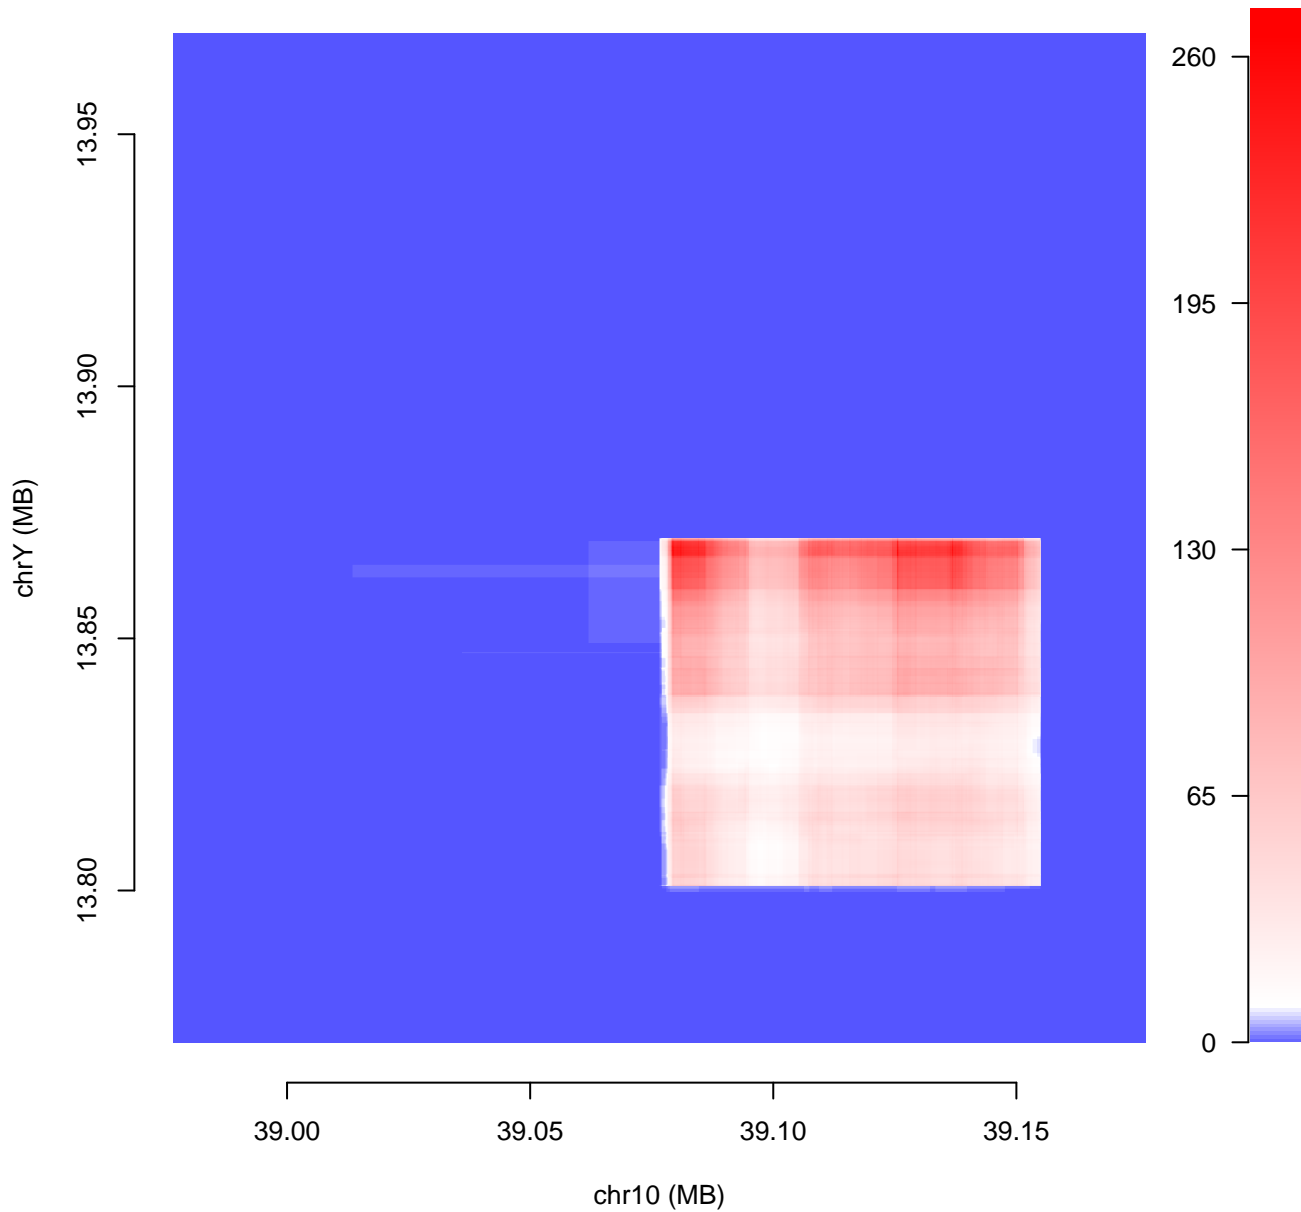

K562 chr2:89,855,971::chr10:39,154,935++

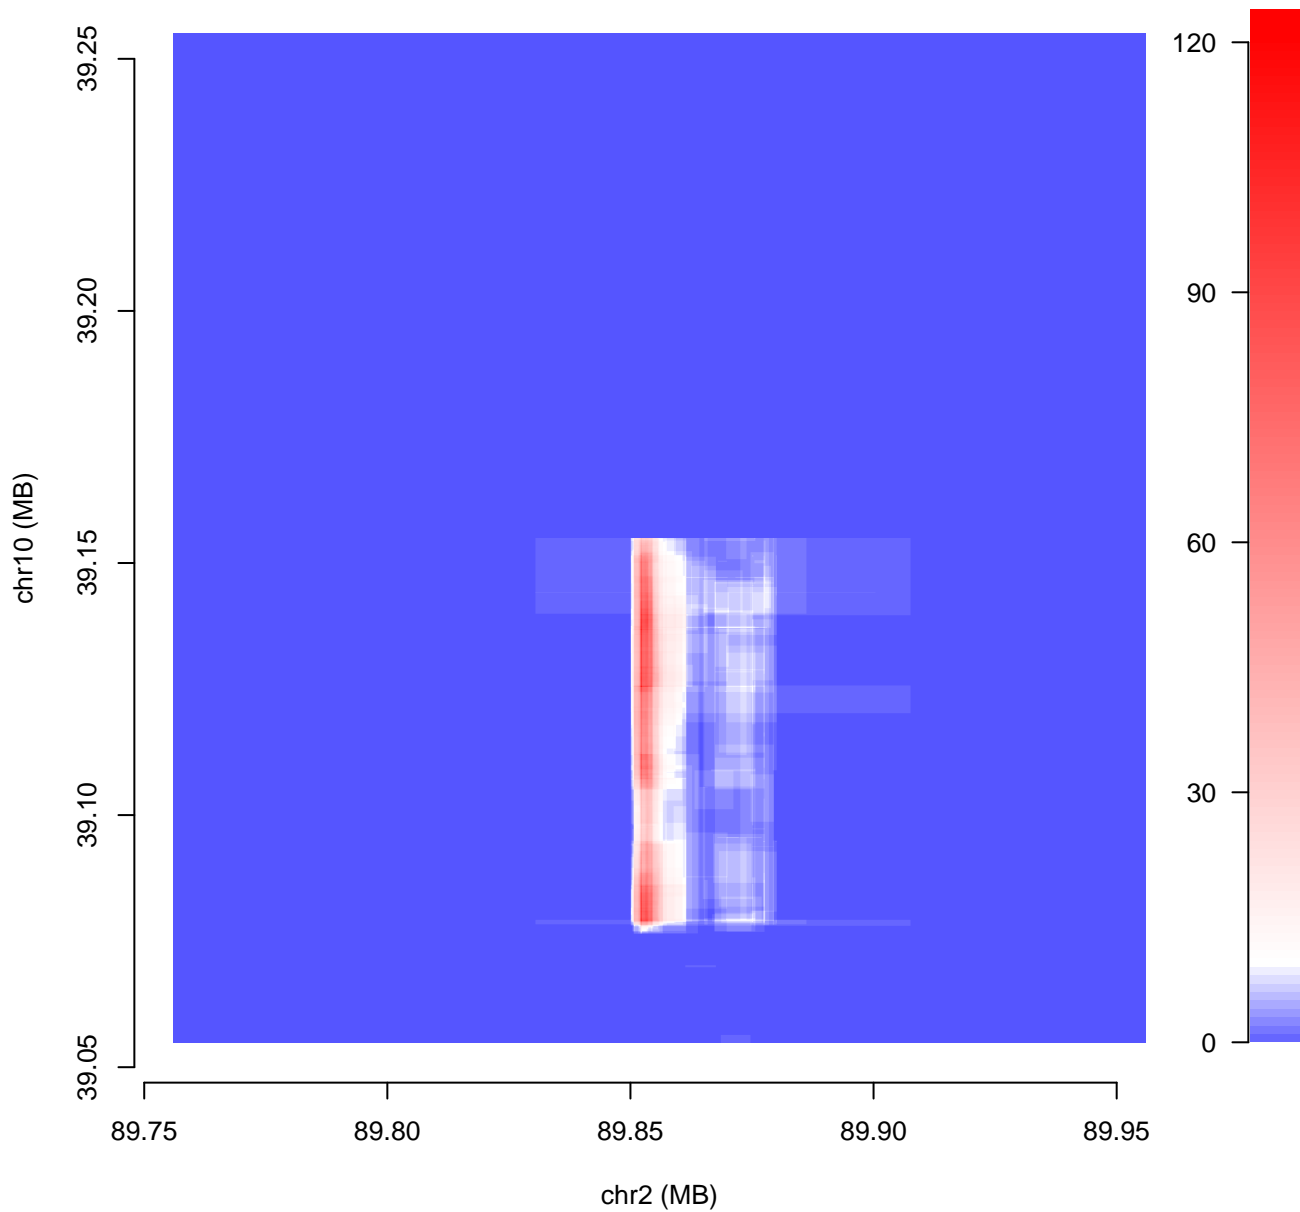

Supplement: Supplemental_Data.zip [file event_55.pdf › event_55.pdf]

Barcode

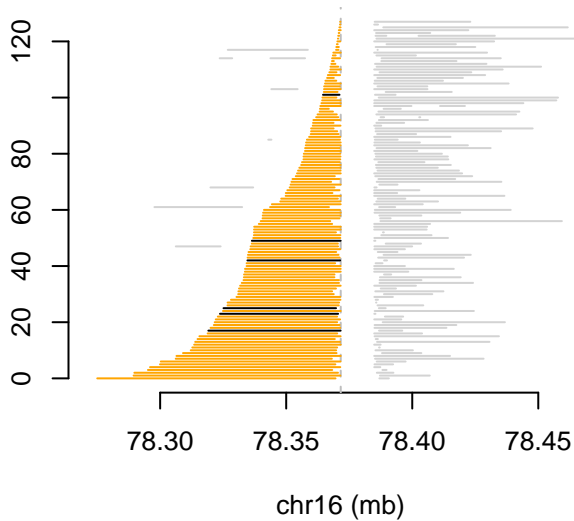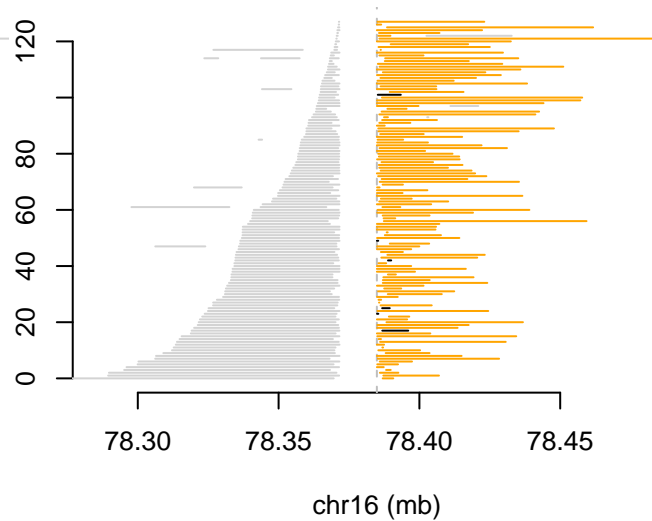

Copy number

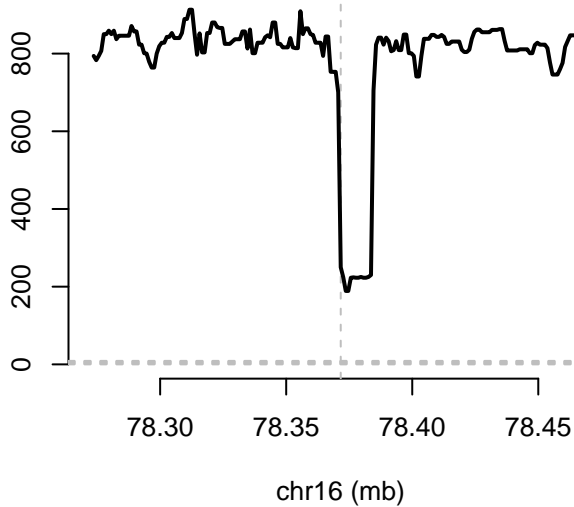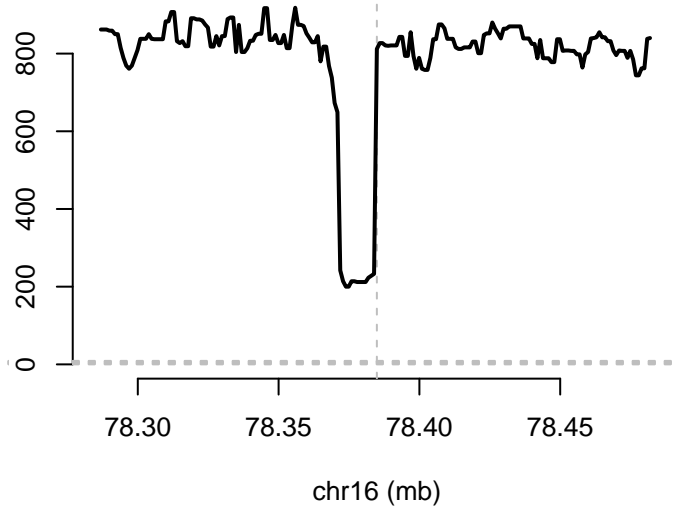

K562 chr16:78,371,638::chr16:78,384,898+-

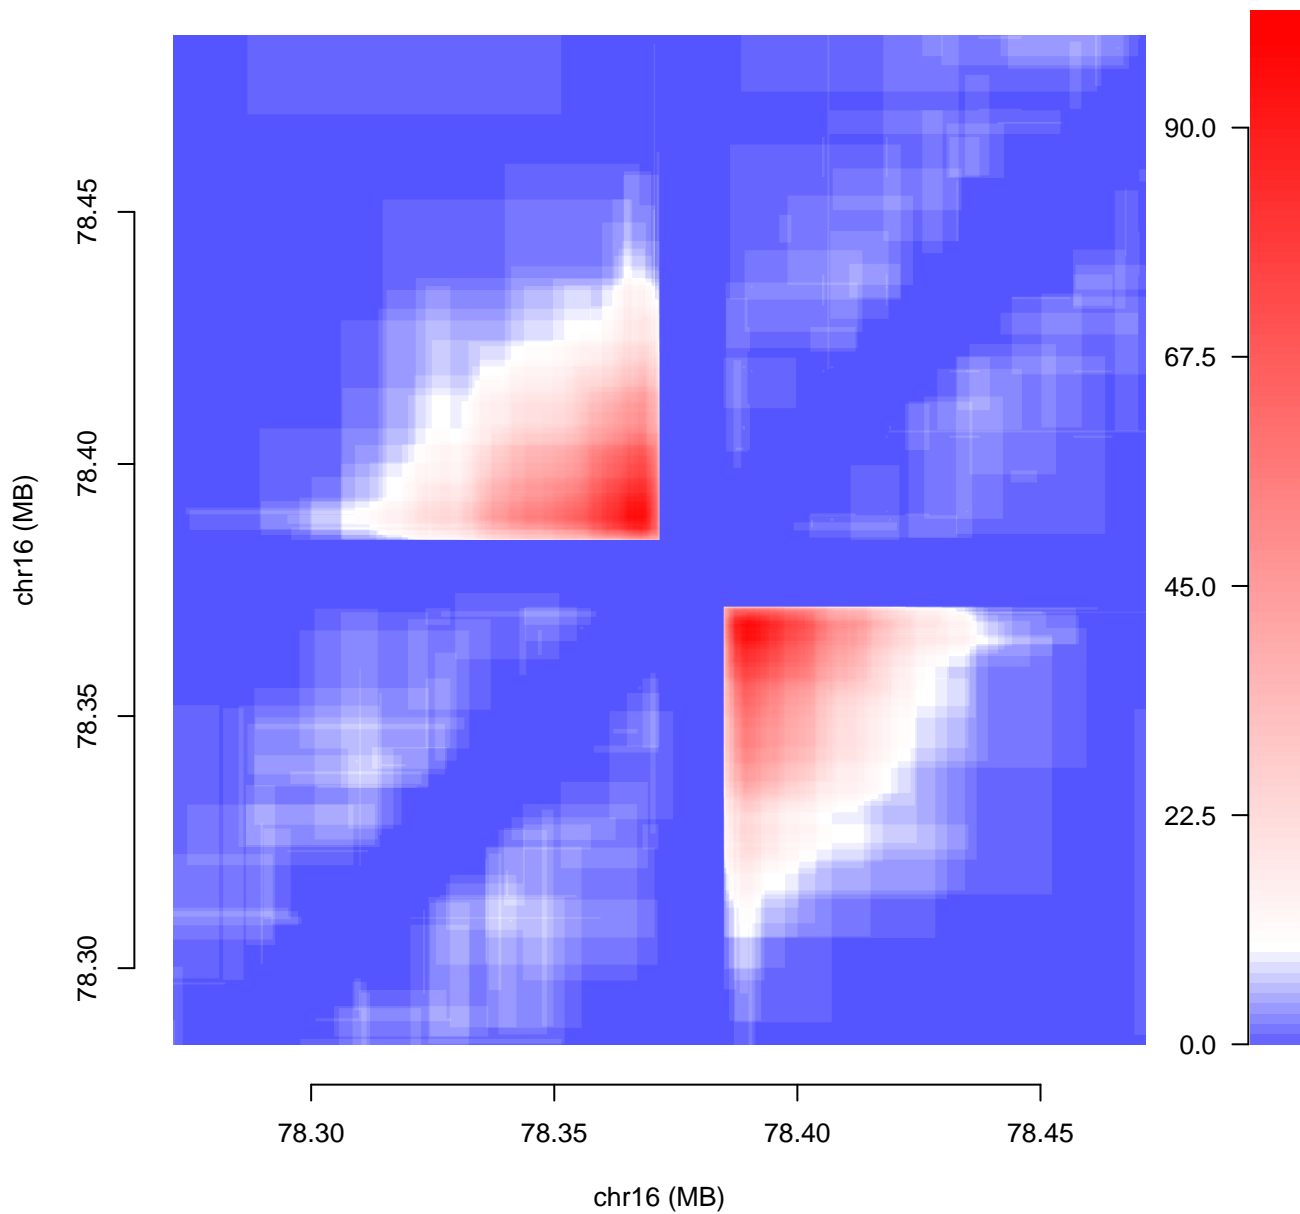

Supplement: Supplemental_Data.zip [file event_550.pdf › event_550.pdf]

Barcode

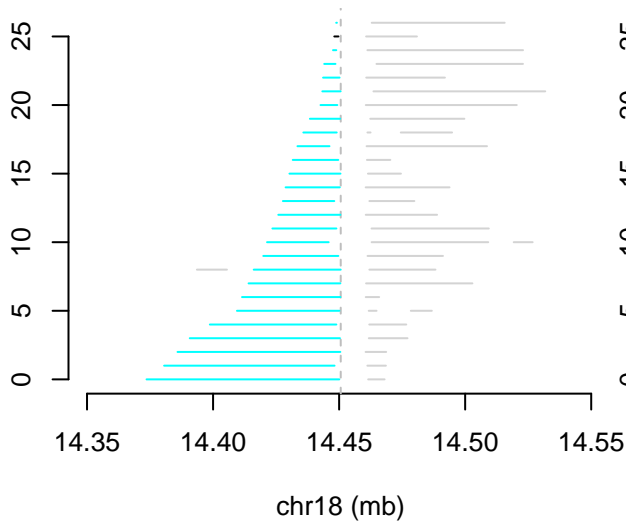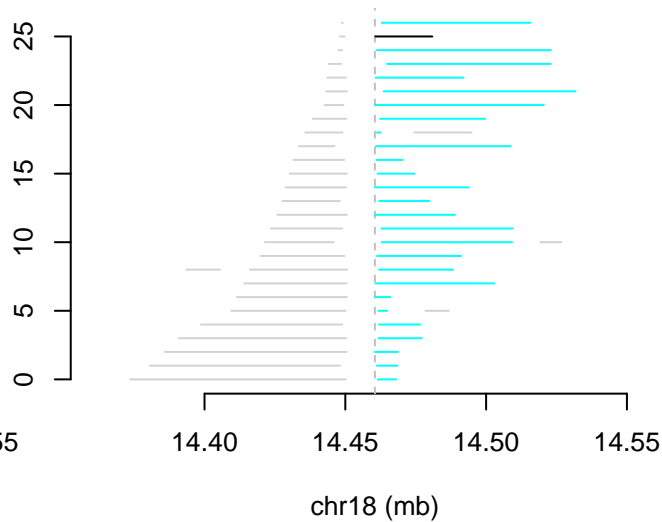

Copy number

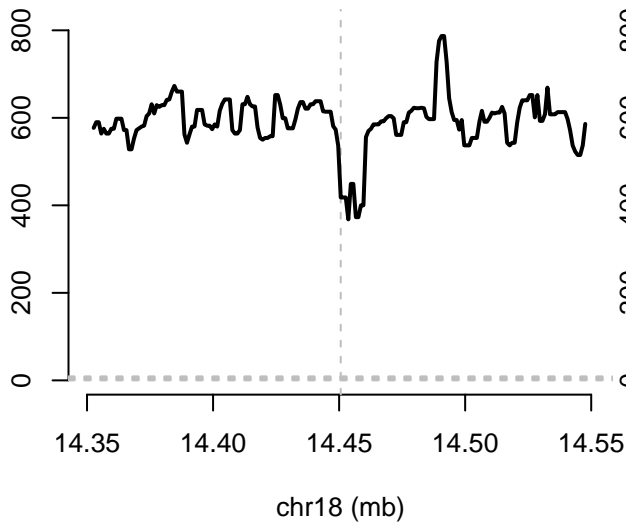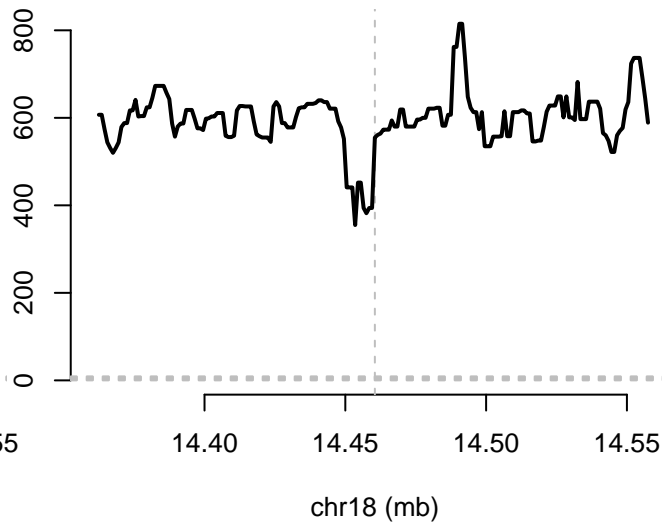

K562 chr18:14,460,492::chr18:14,450,641-+

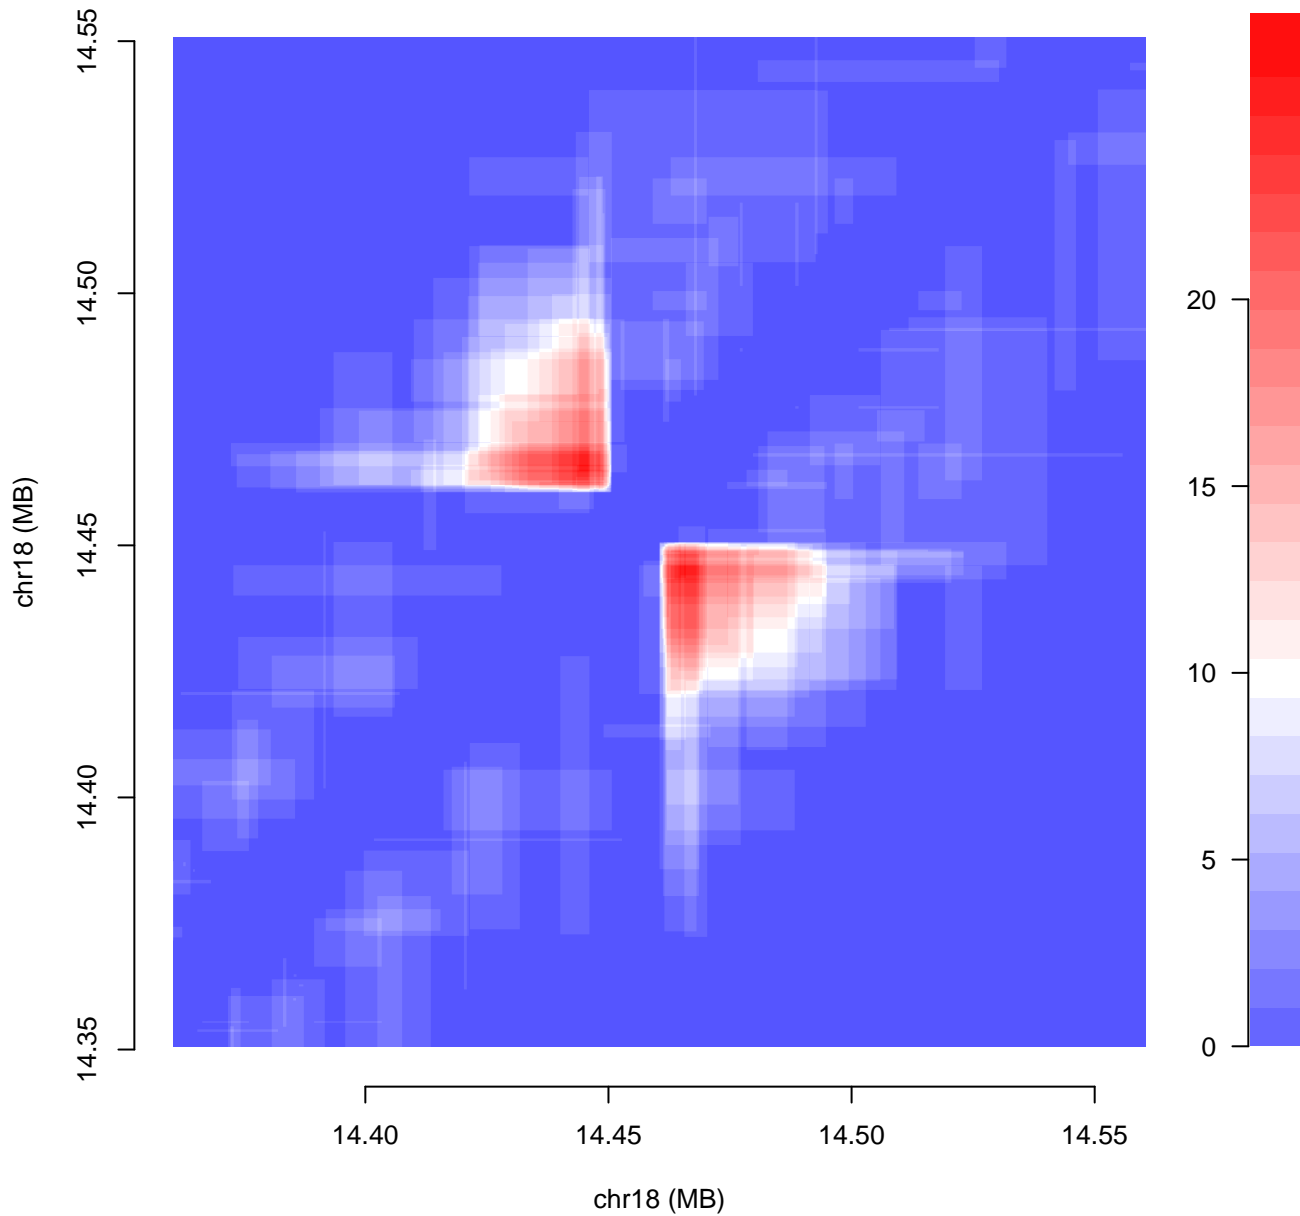

Supplement: Supplemental_Data.zip [file event_551.pdf › event_551.pdf]

Barcode

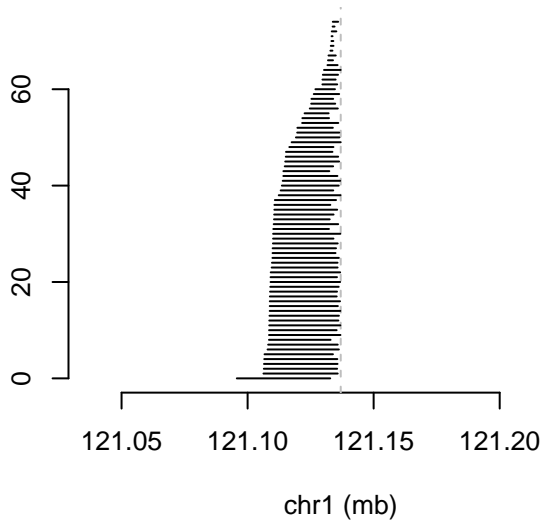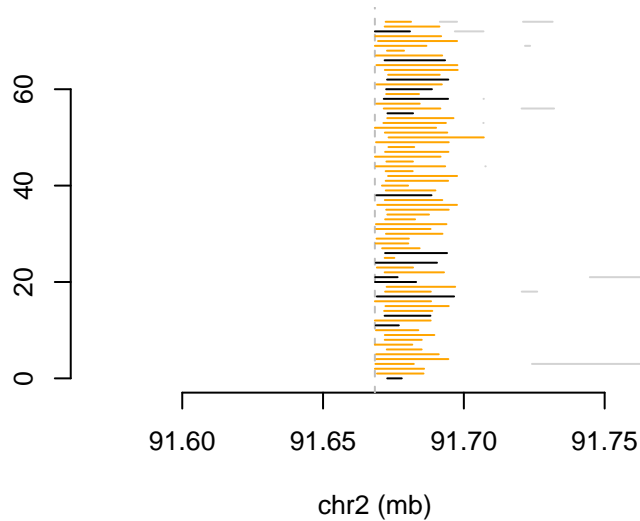

Copy number

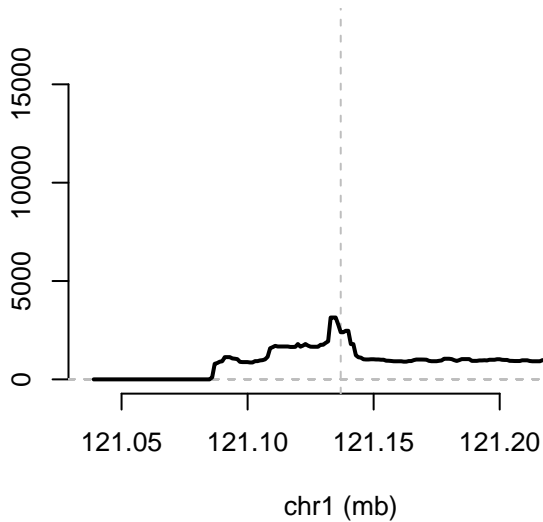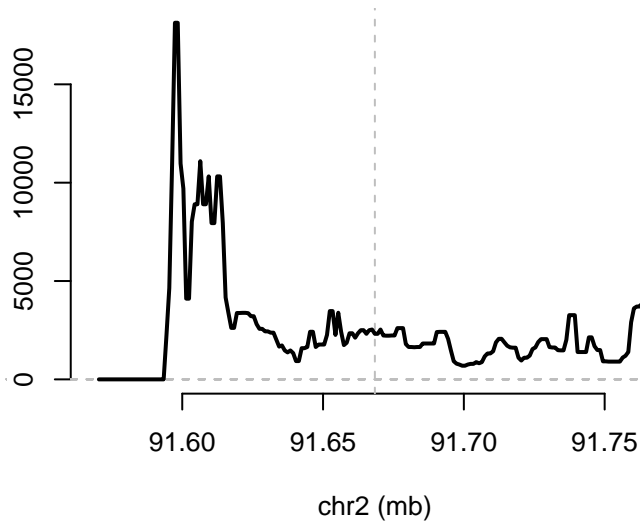

K562 chr1:121,136,947::chr2:91,668,405+-

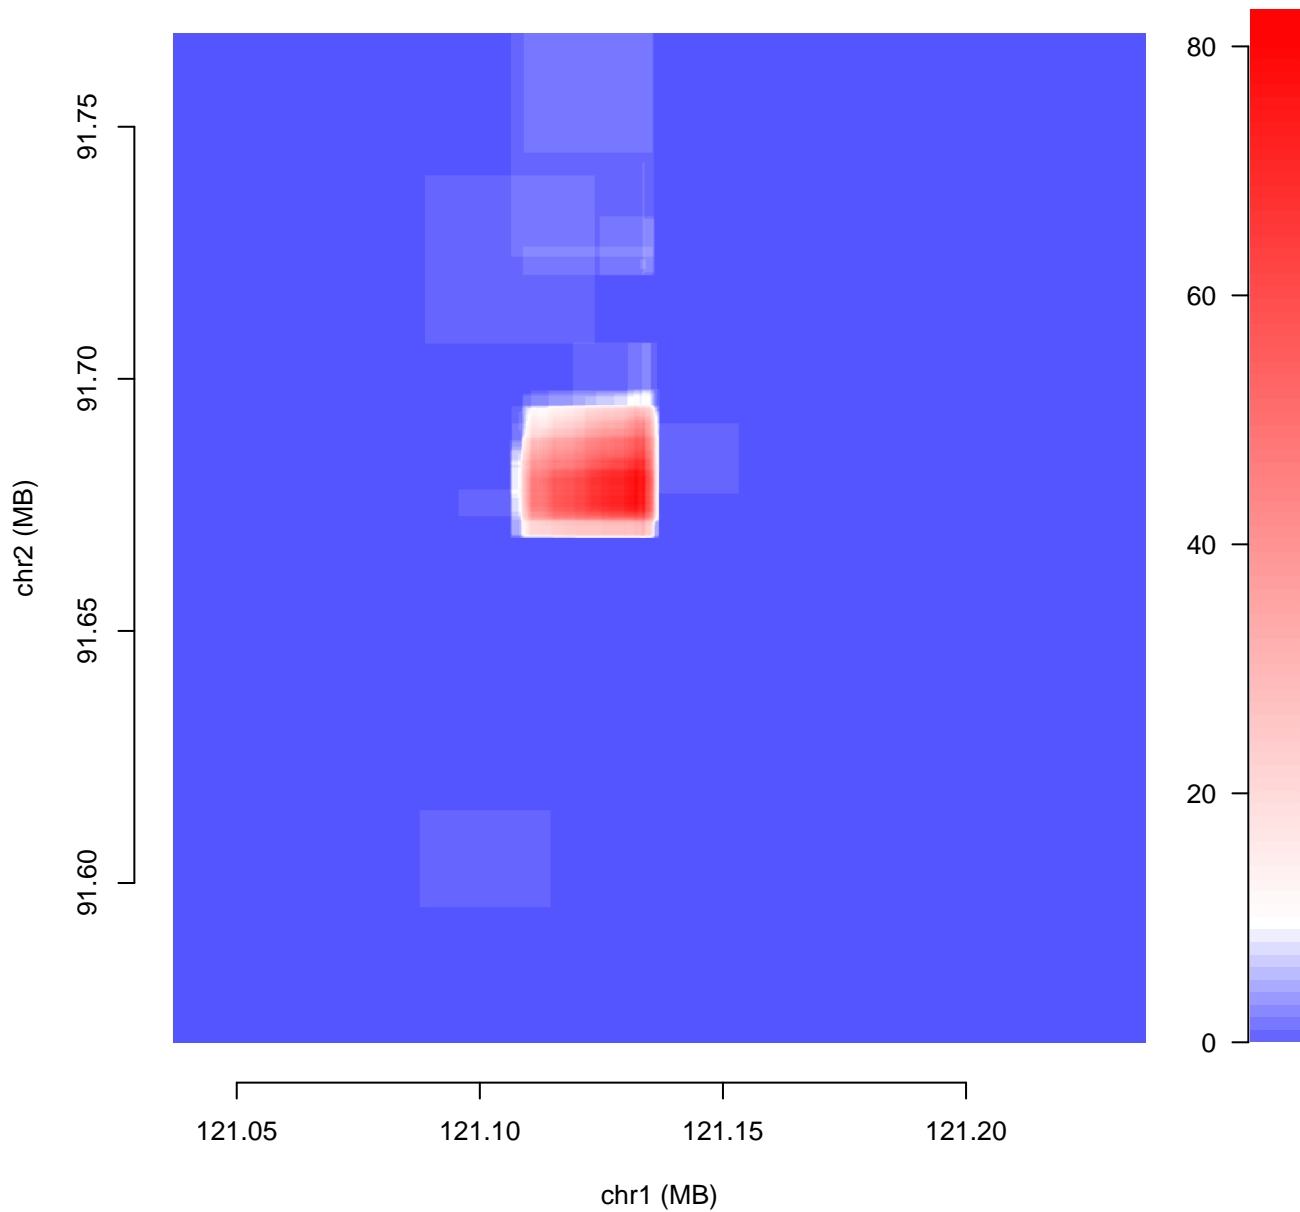

Supplement: Supplemental_Data.zip [file event_552.pdf › event_552.pdf]

Barcode

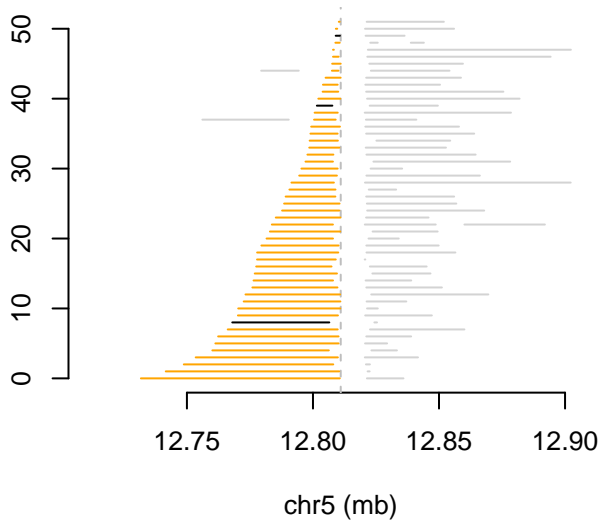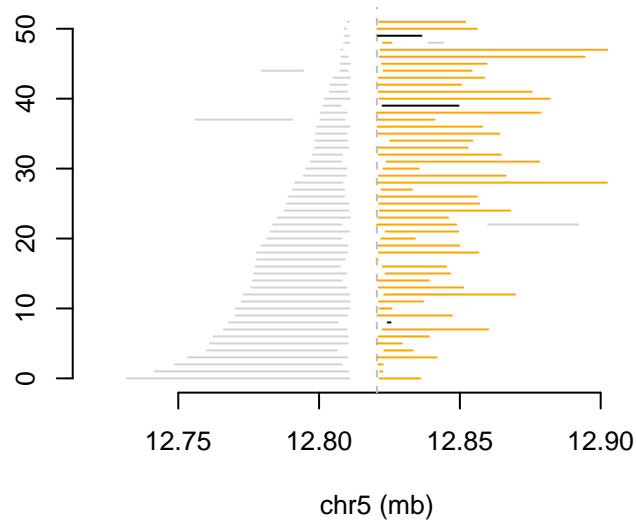

Copy number

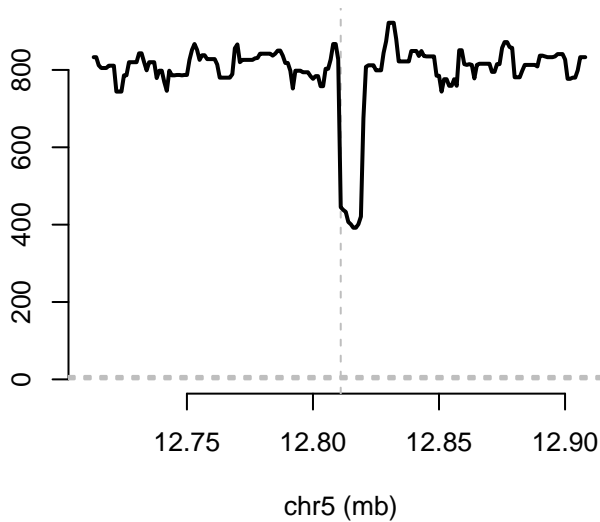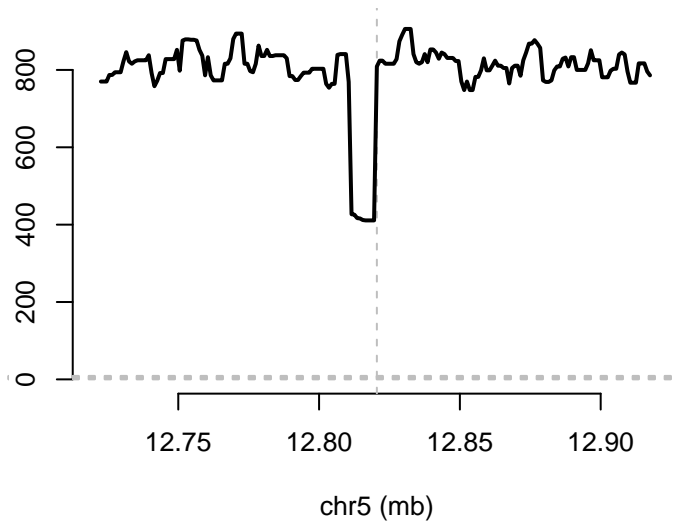

K562 chr5:12,820,522::chr5:12,811,020-+

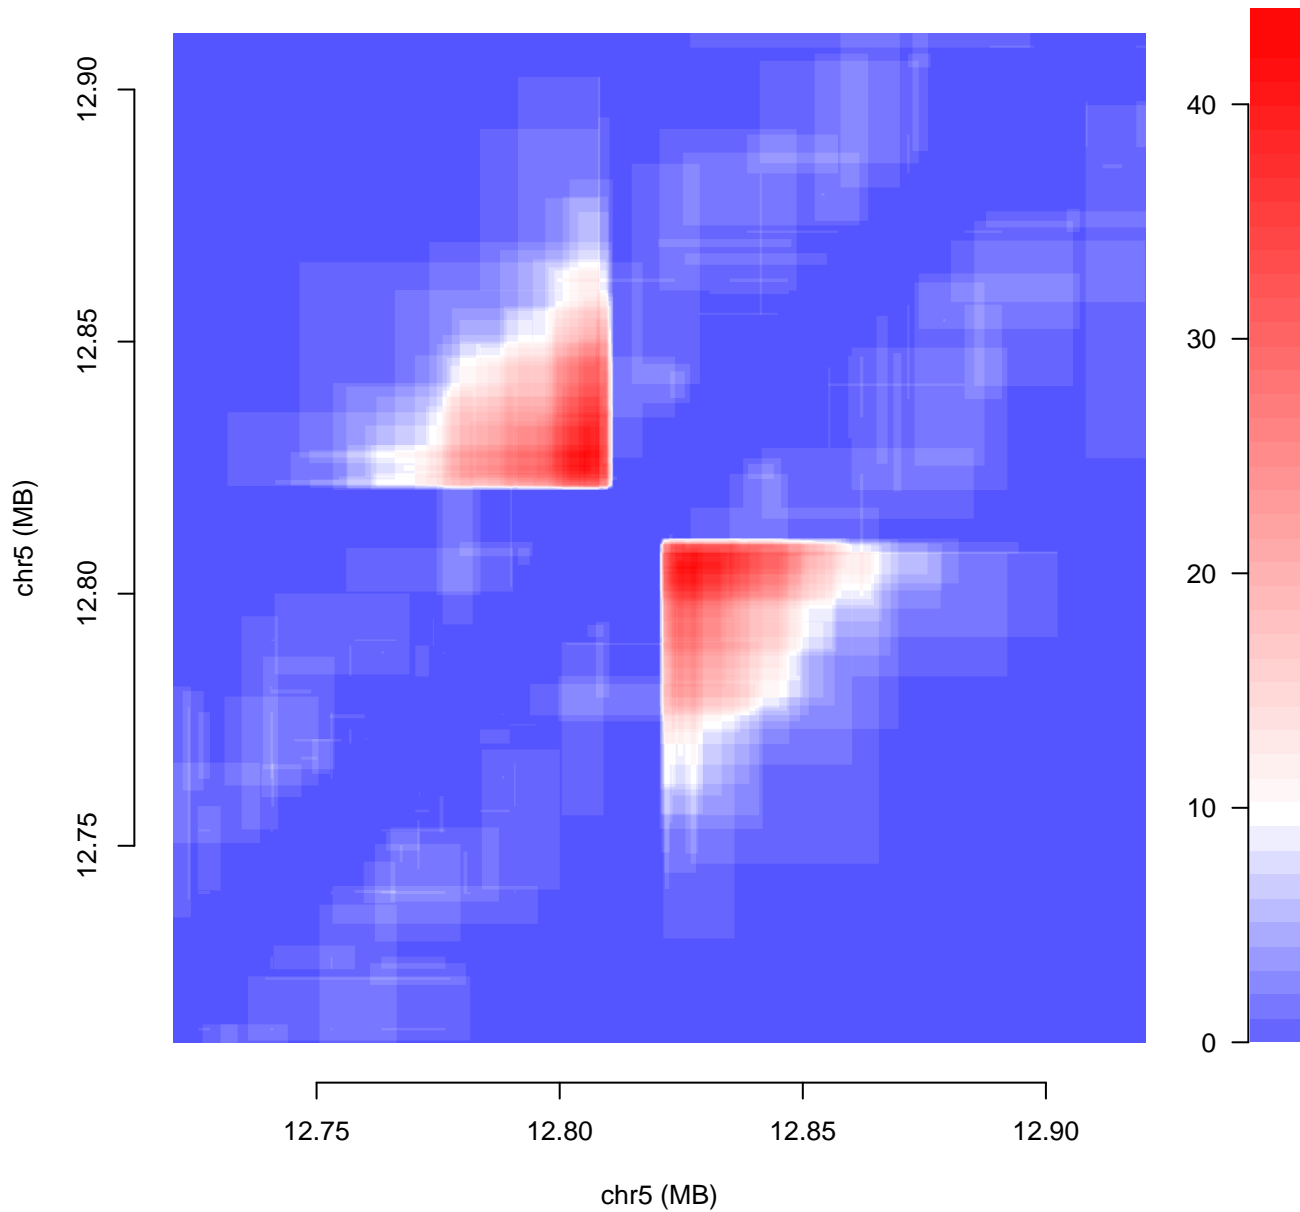

Supplement: Supplemental_Data.zip [file event_553.pdf › event_553.pdf]

Barcode

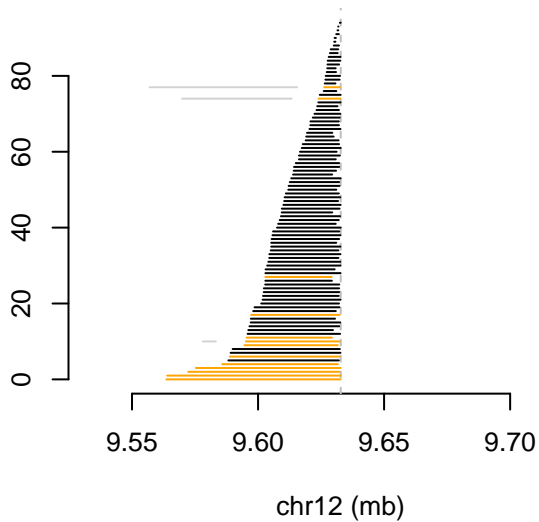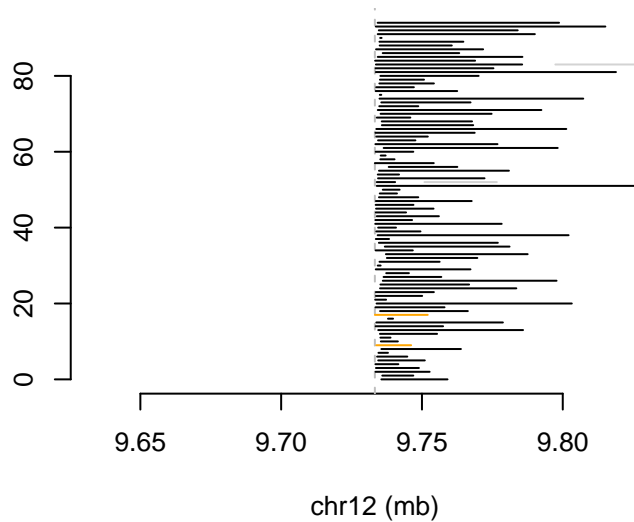

Copy number

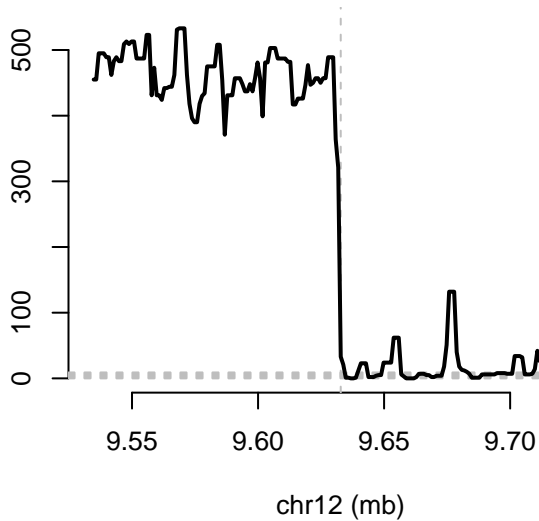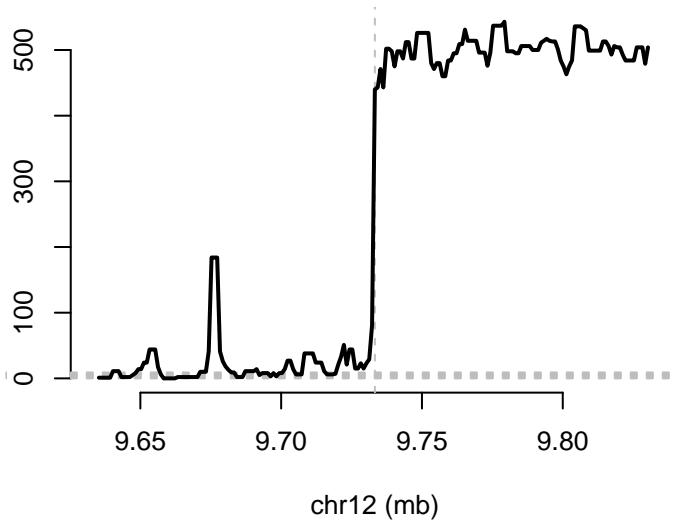

K562 chr12:9,733,276::chr12:9,632,800--+

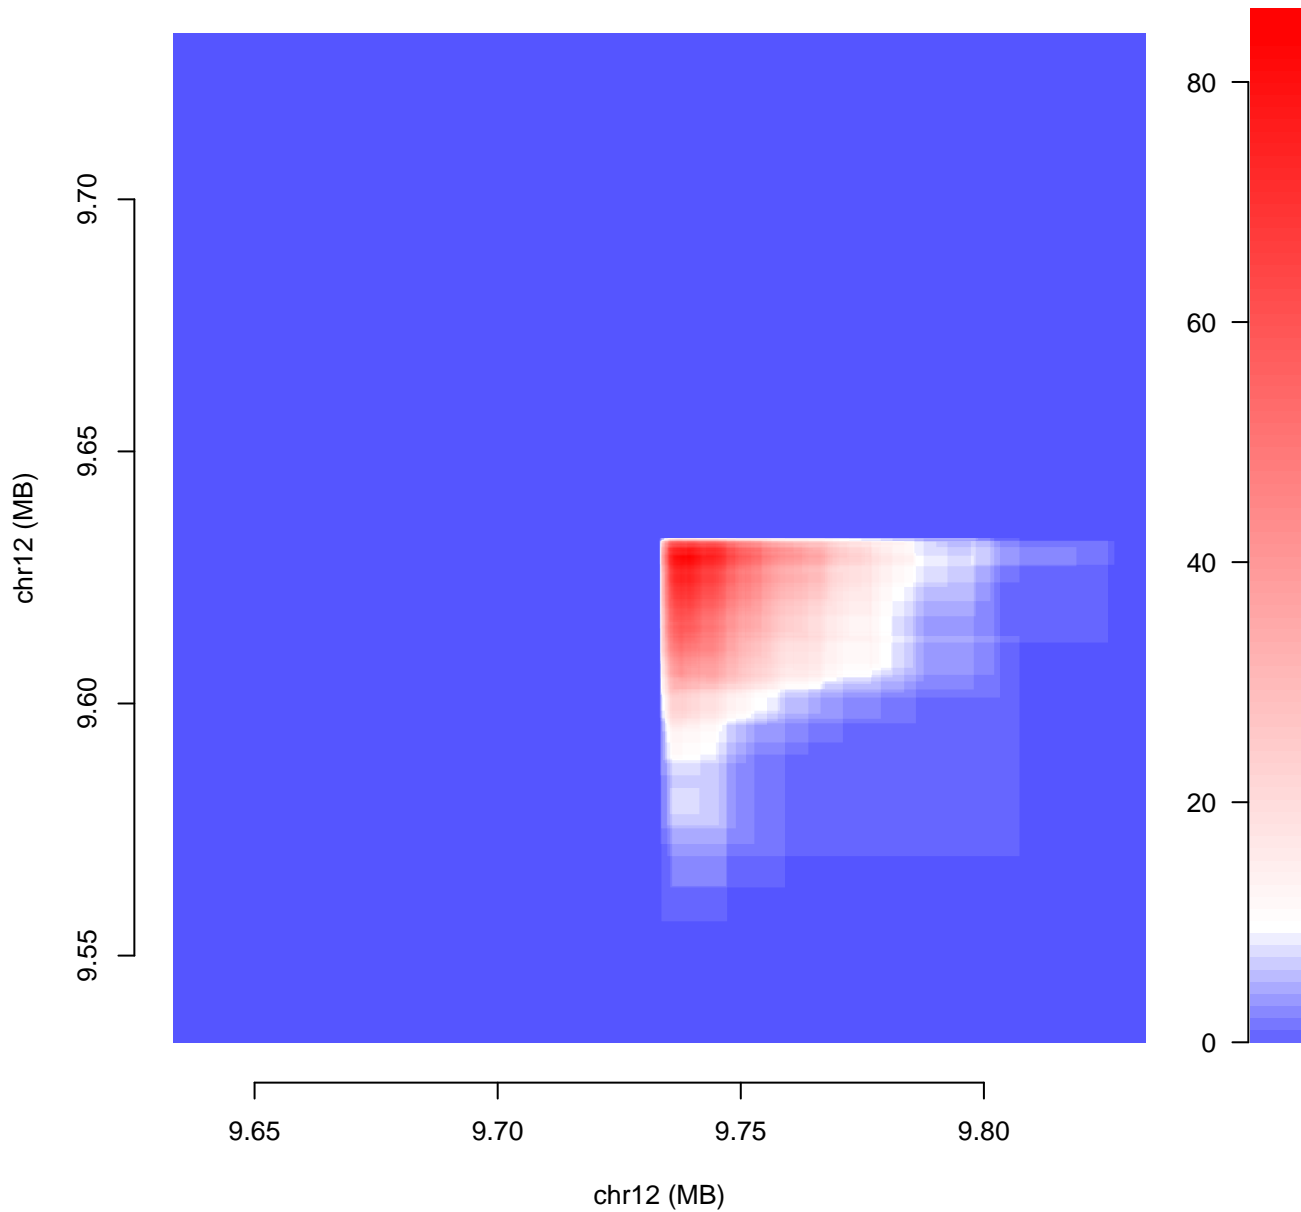

Supplement: Supplemental_Data.zip [file event_554.pdf › event_554.pdf]

Barcode

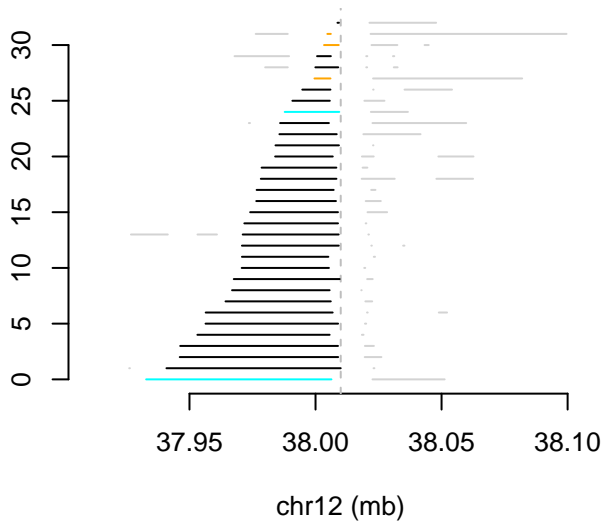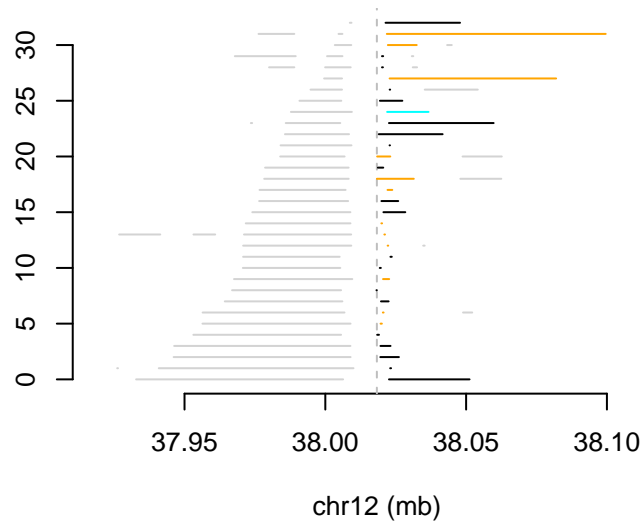

Copy number

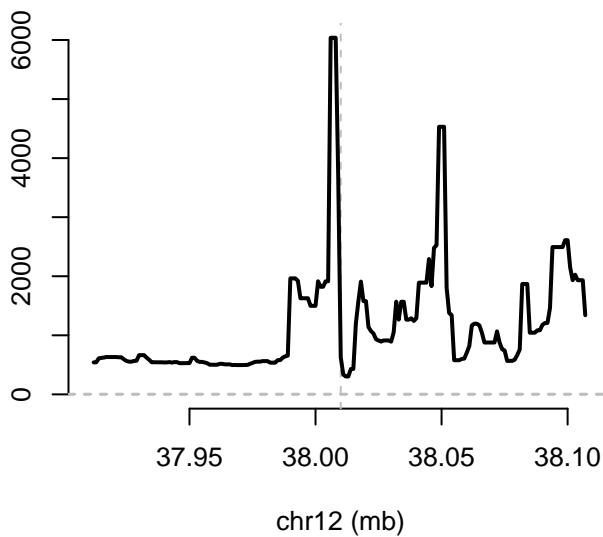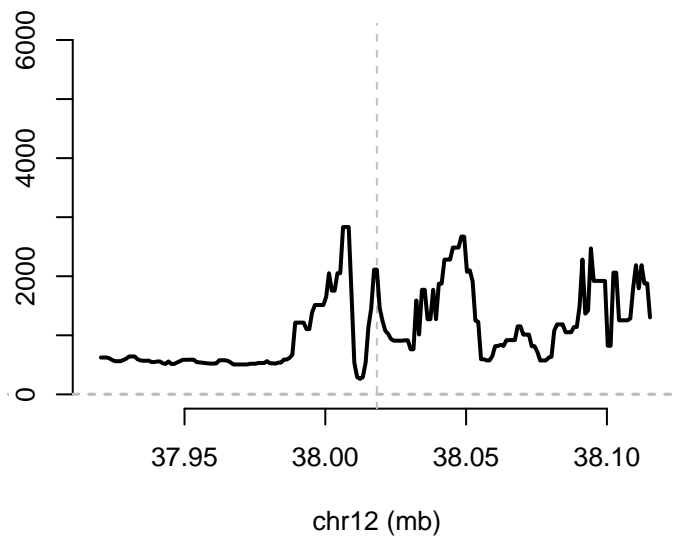

K562 chr12:38,010,004::chr12:38,018,306+-

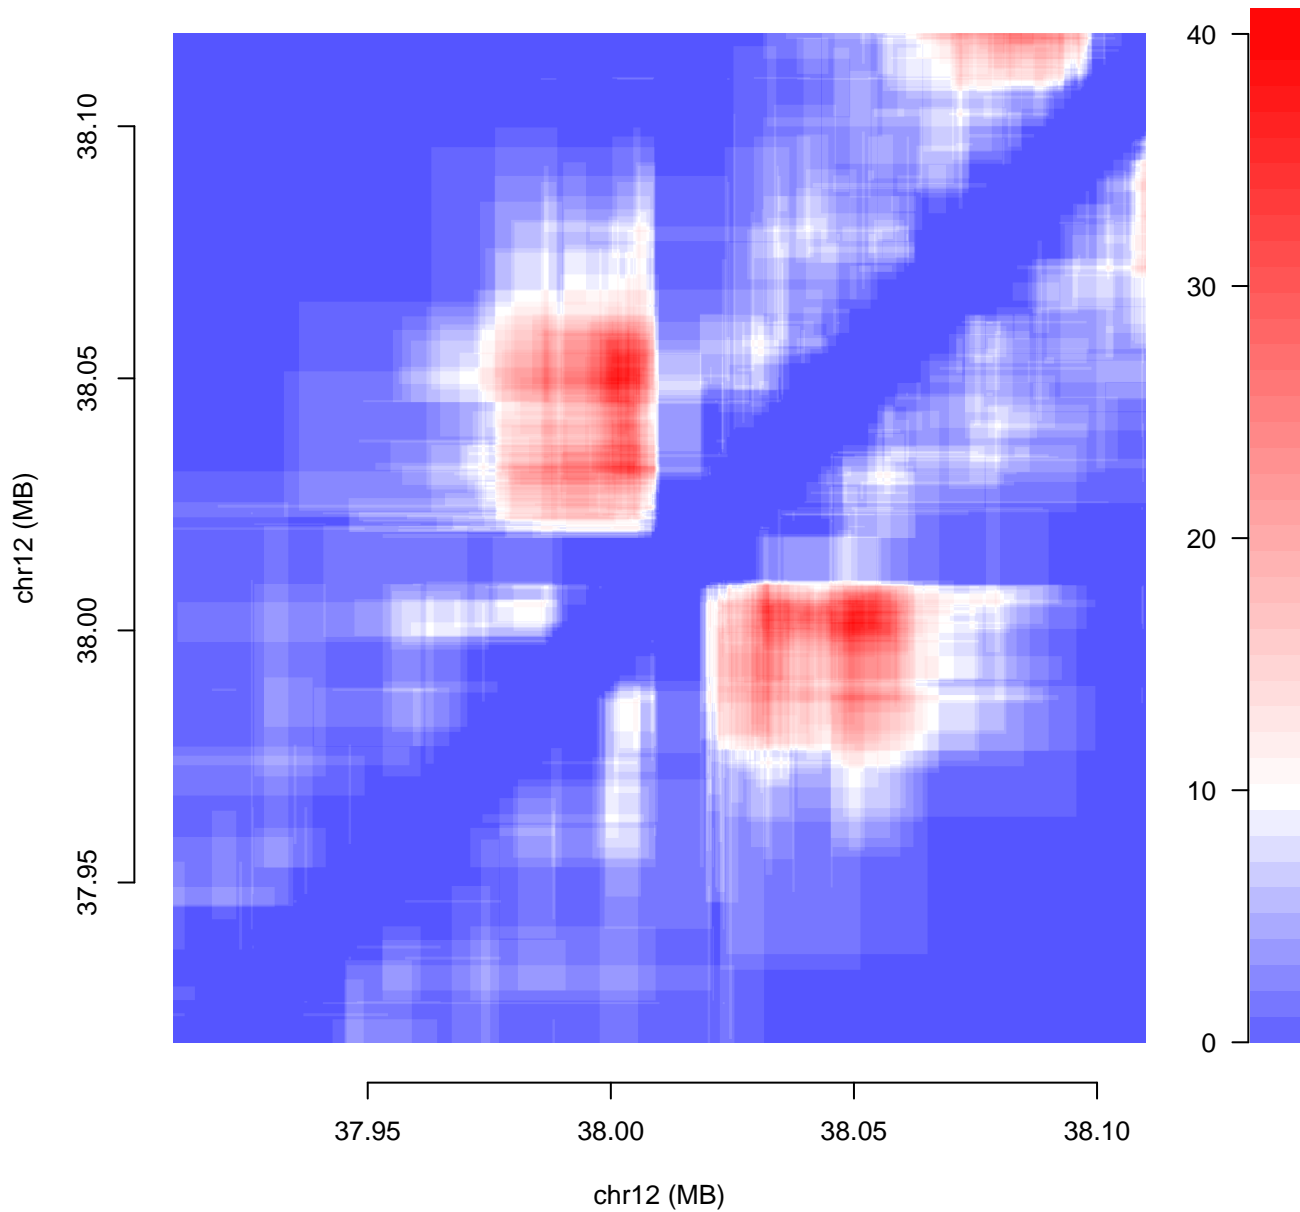

Supplement: Supplemental_Data.zip [file event_555.pdf › event_555.pdf]

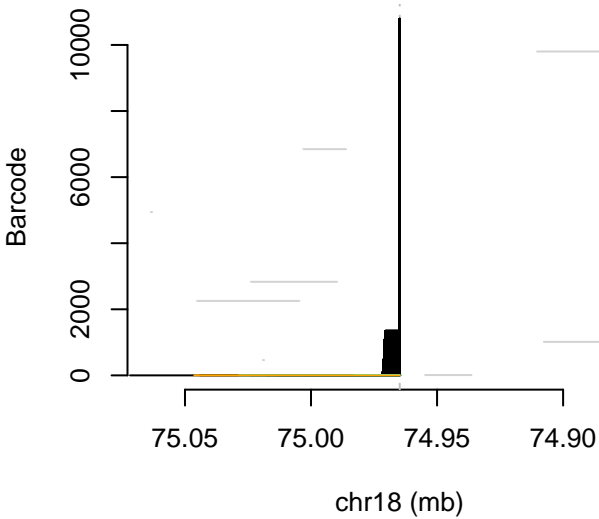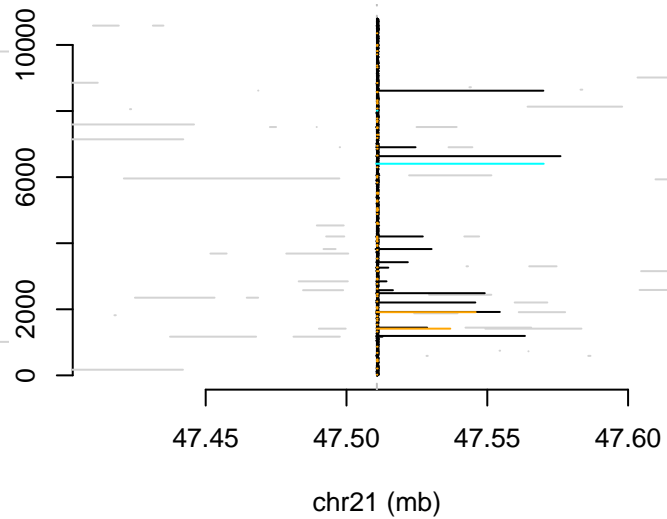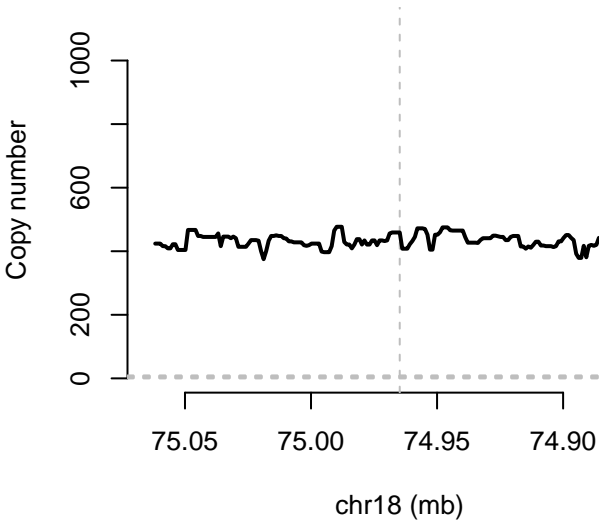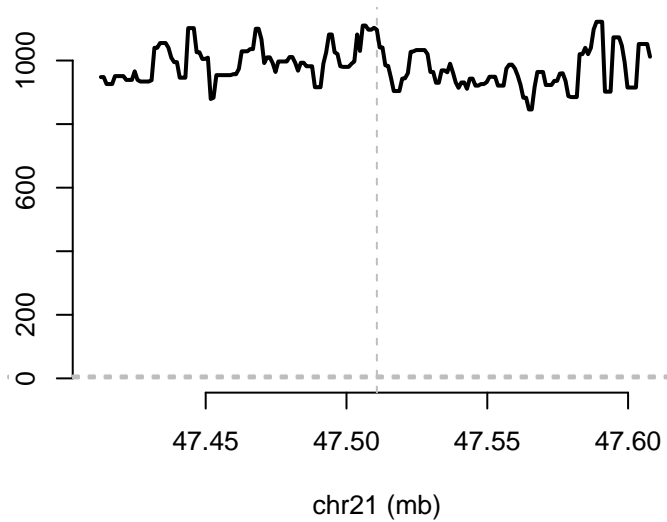

K562 chr18:74,964,806::chr21:47,510,792--

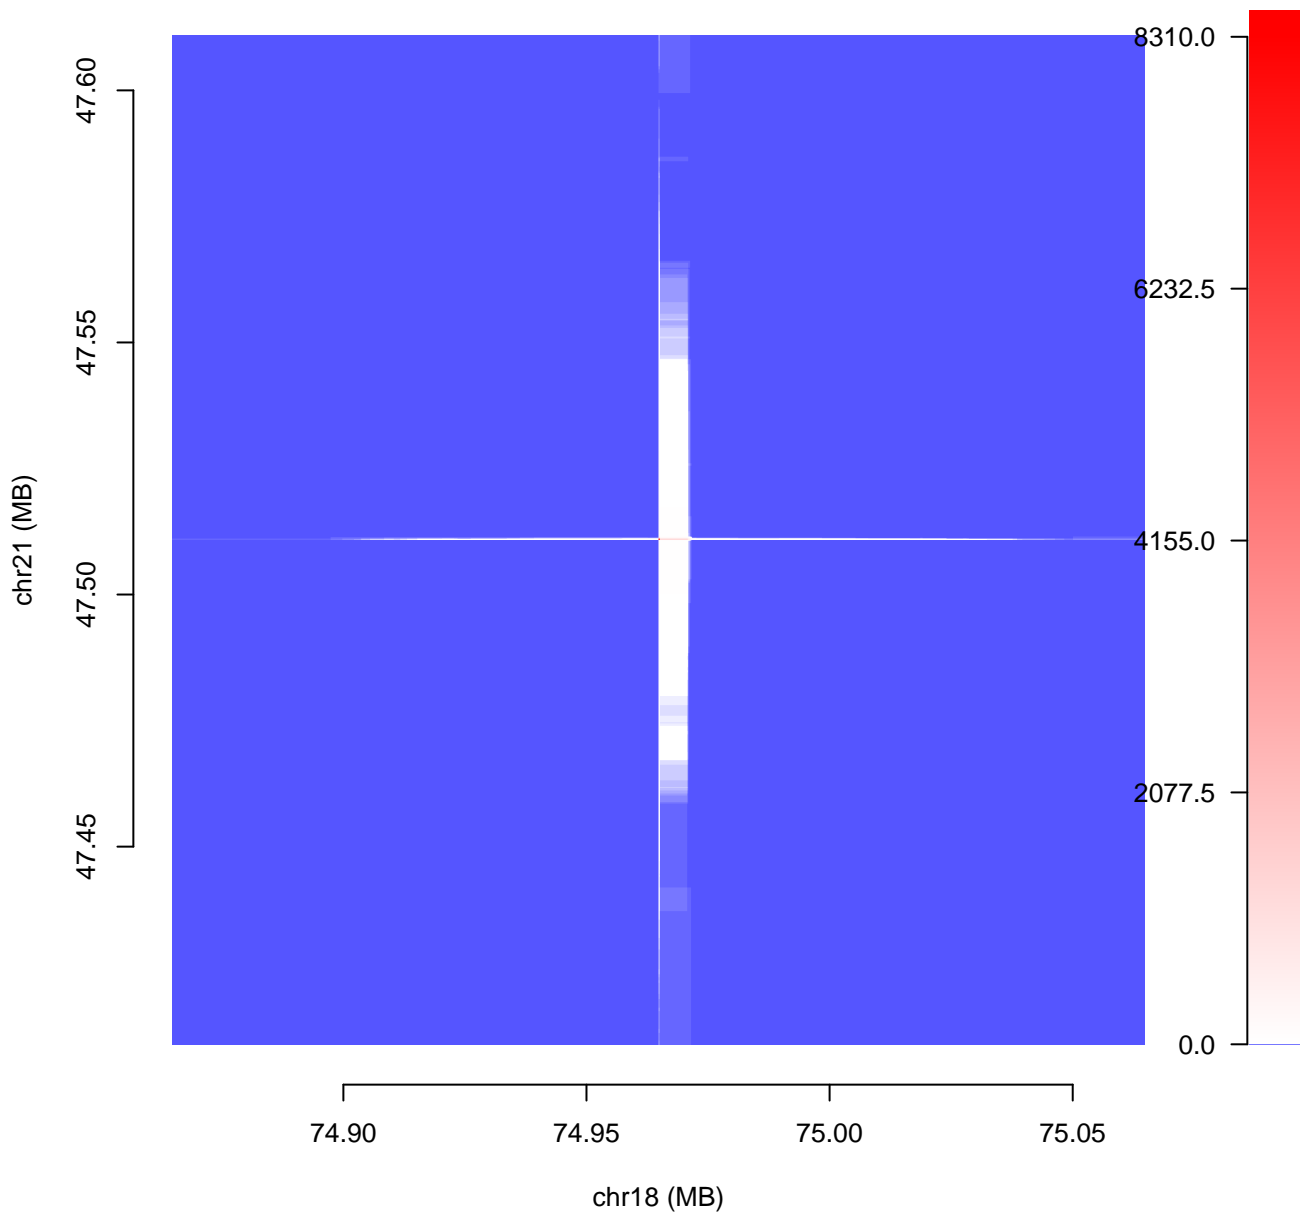

Supplement: Supplemental_Data.zip [file event_556.pdf › event_556.pdf]

Barcode

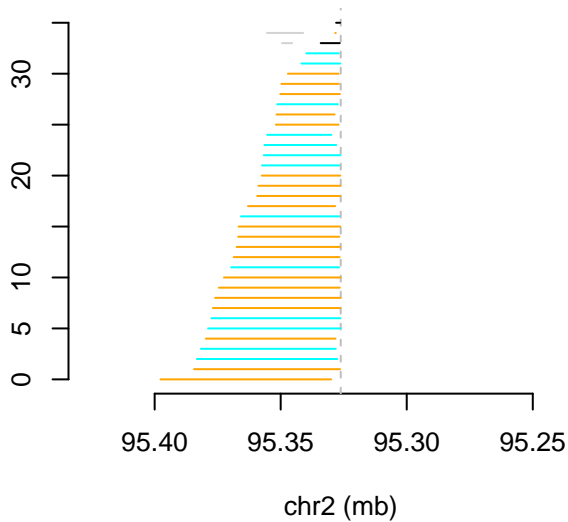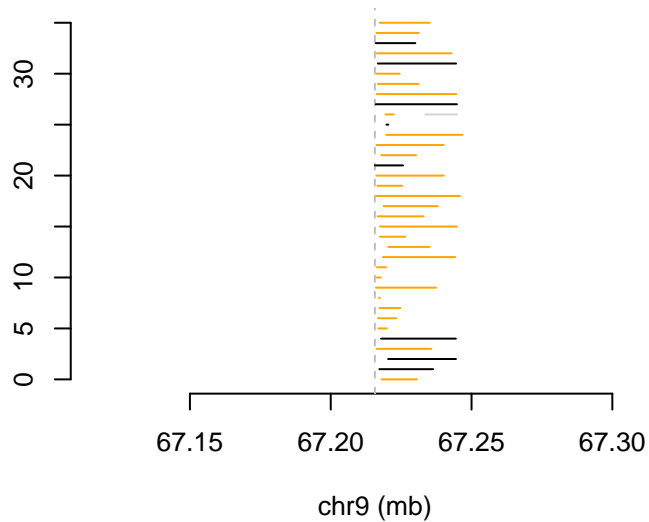

Copy number

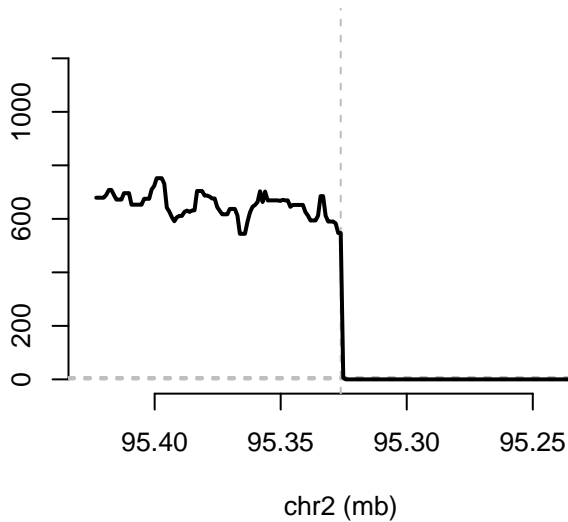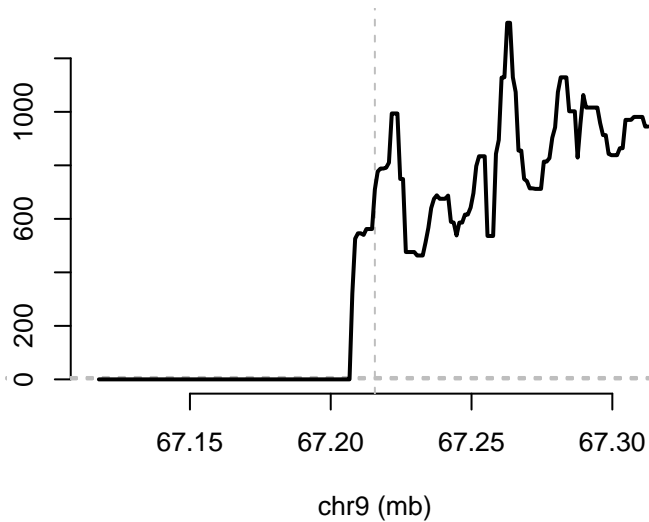

K562 chr2:95,326,177::chr9:67,215,676--

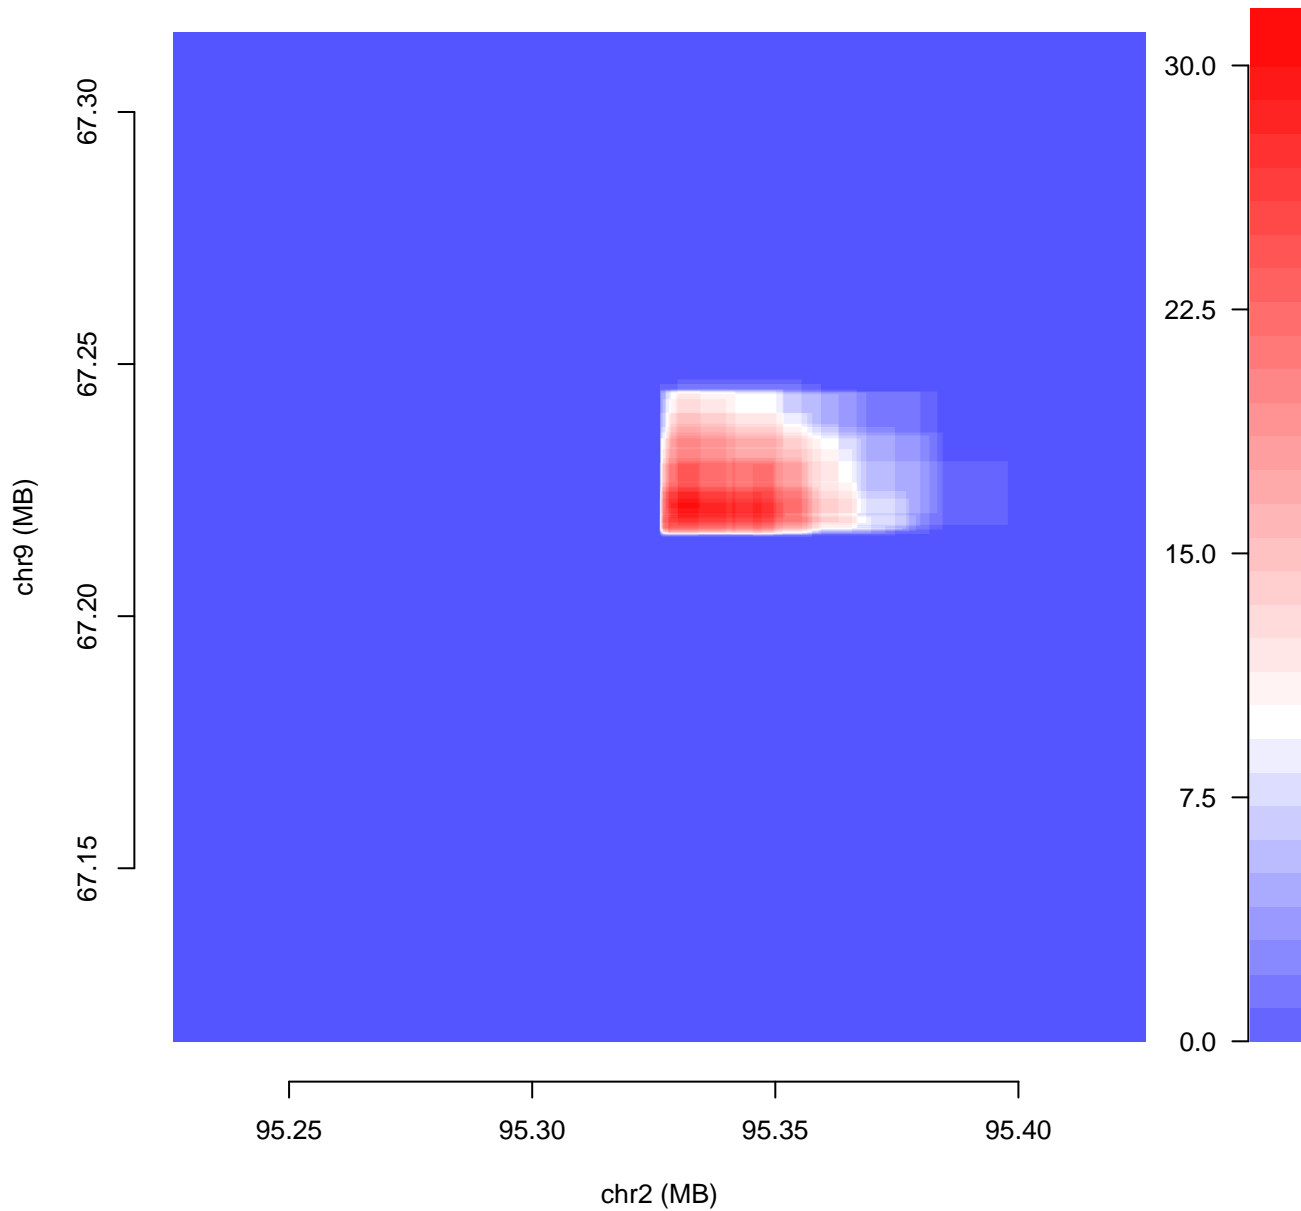

Supplement: Supplemental_Data.zip [file event_557.pdf › event_557.pdf]

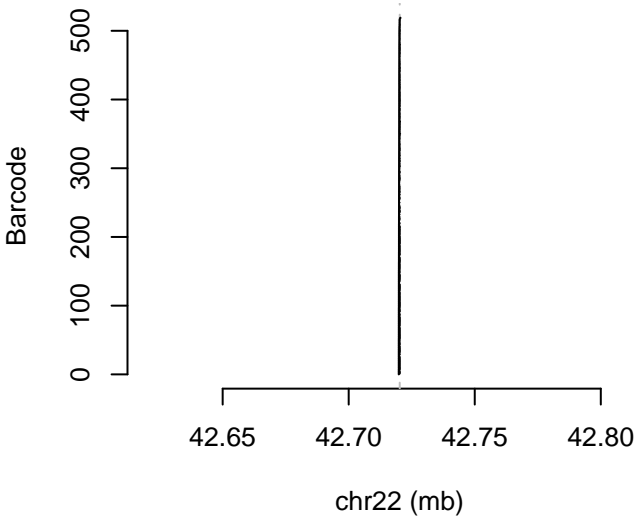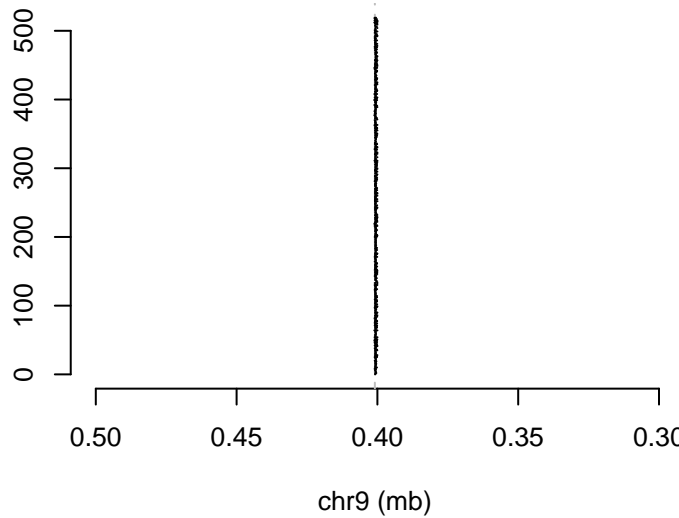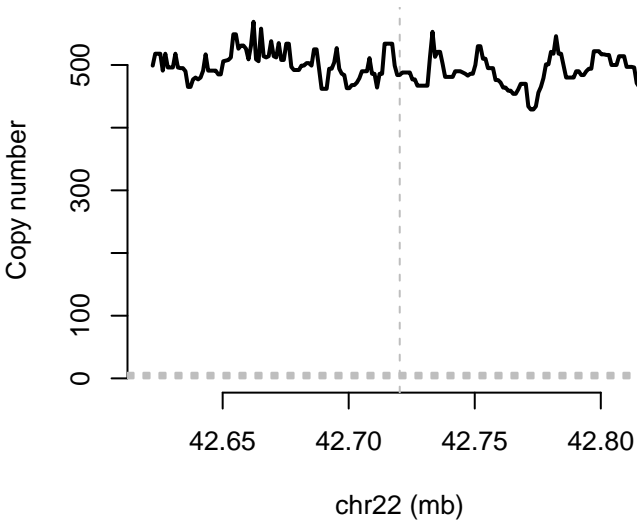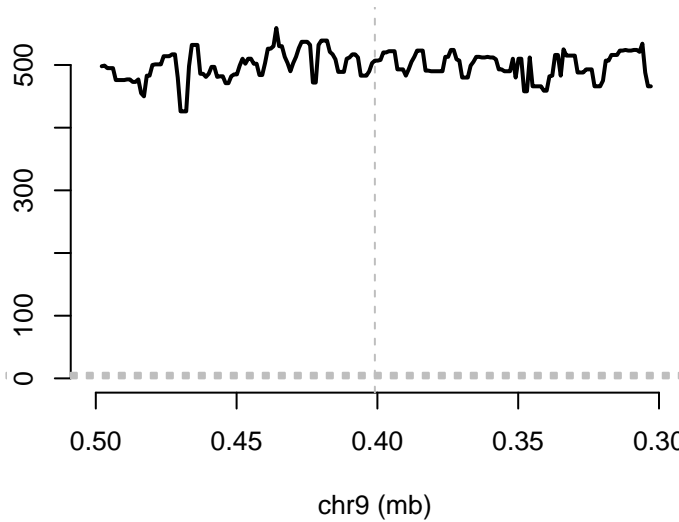

K562 chr9:400,902::chr22:42,720,249++

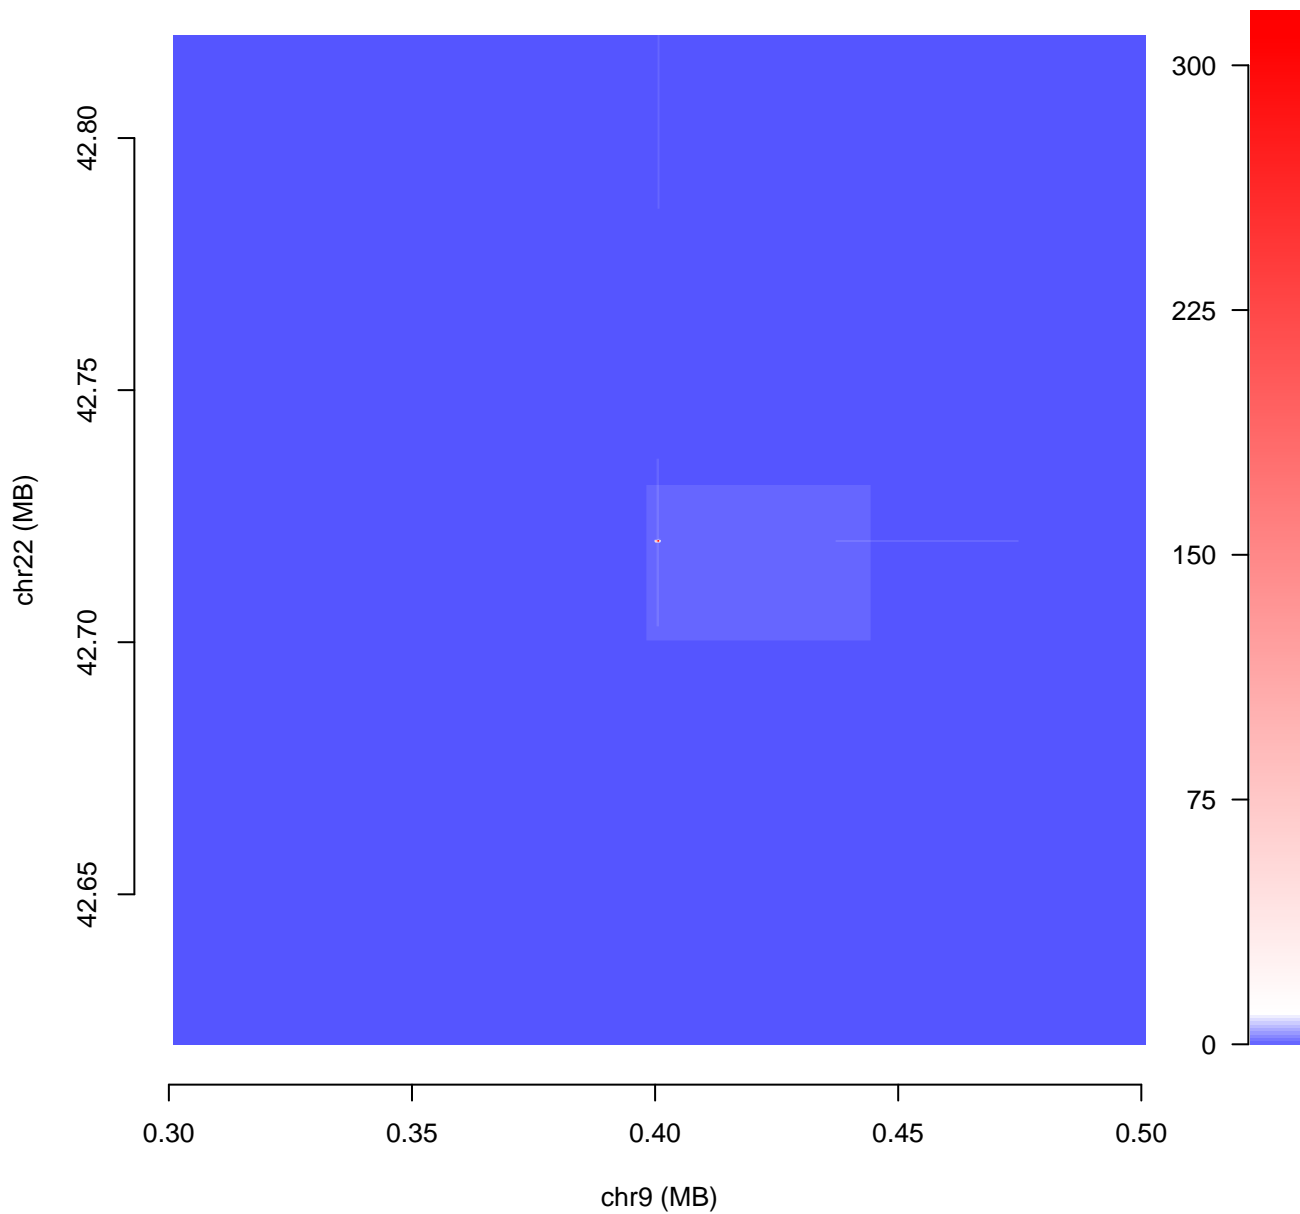

Supplement: Supplemental_Data.zip [file event_558.pdf › event_558.pdf]

Barcode

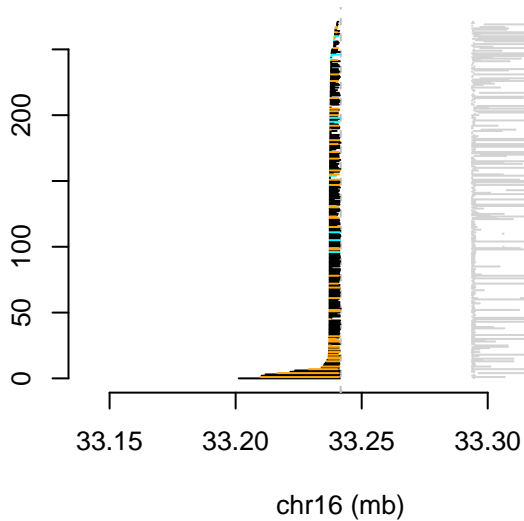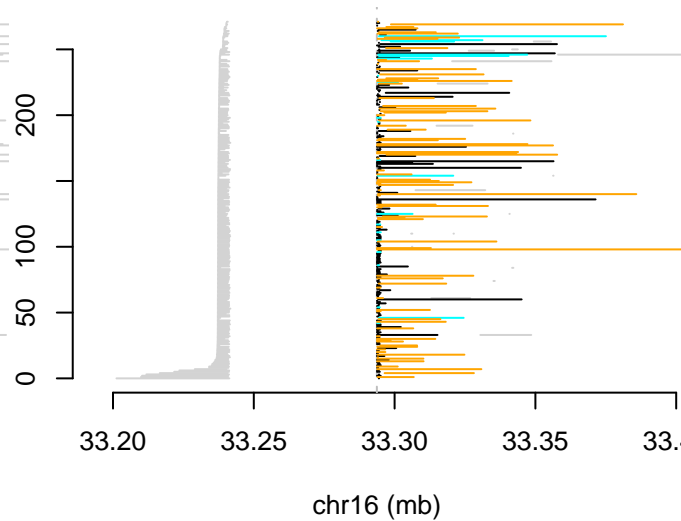

Copy number

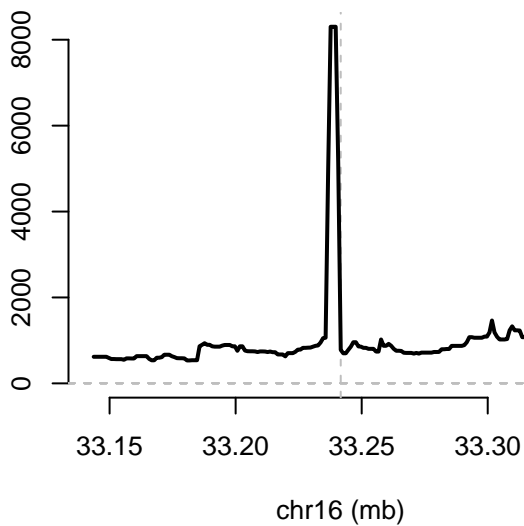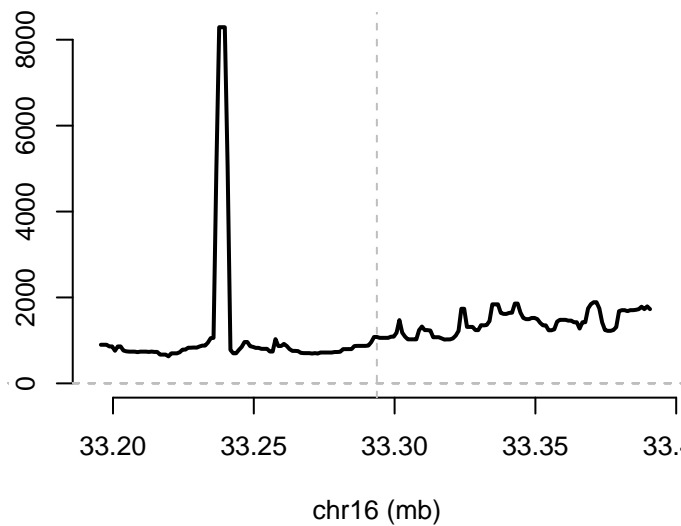

K562 chr16:33,241,694::chr16:33,293,703+-

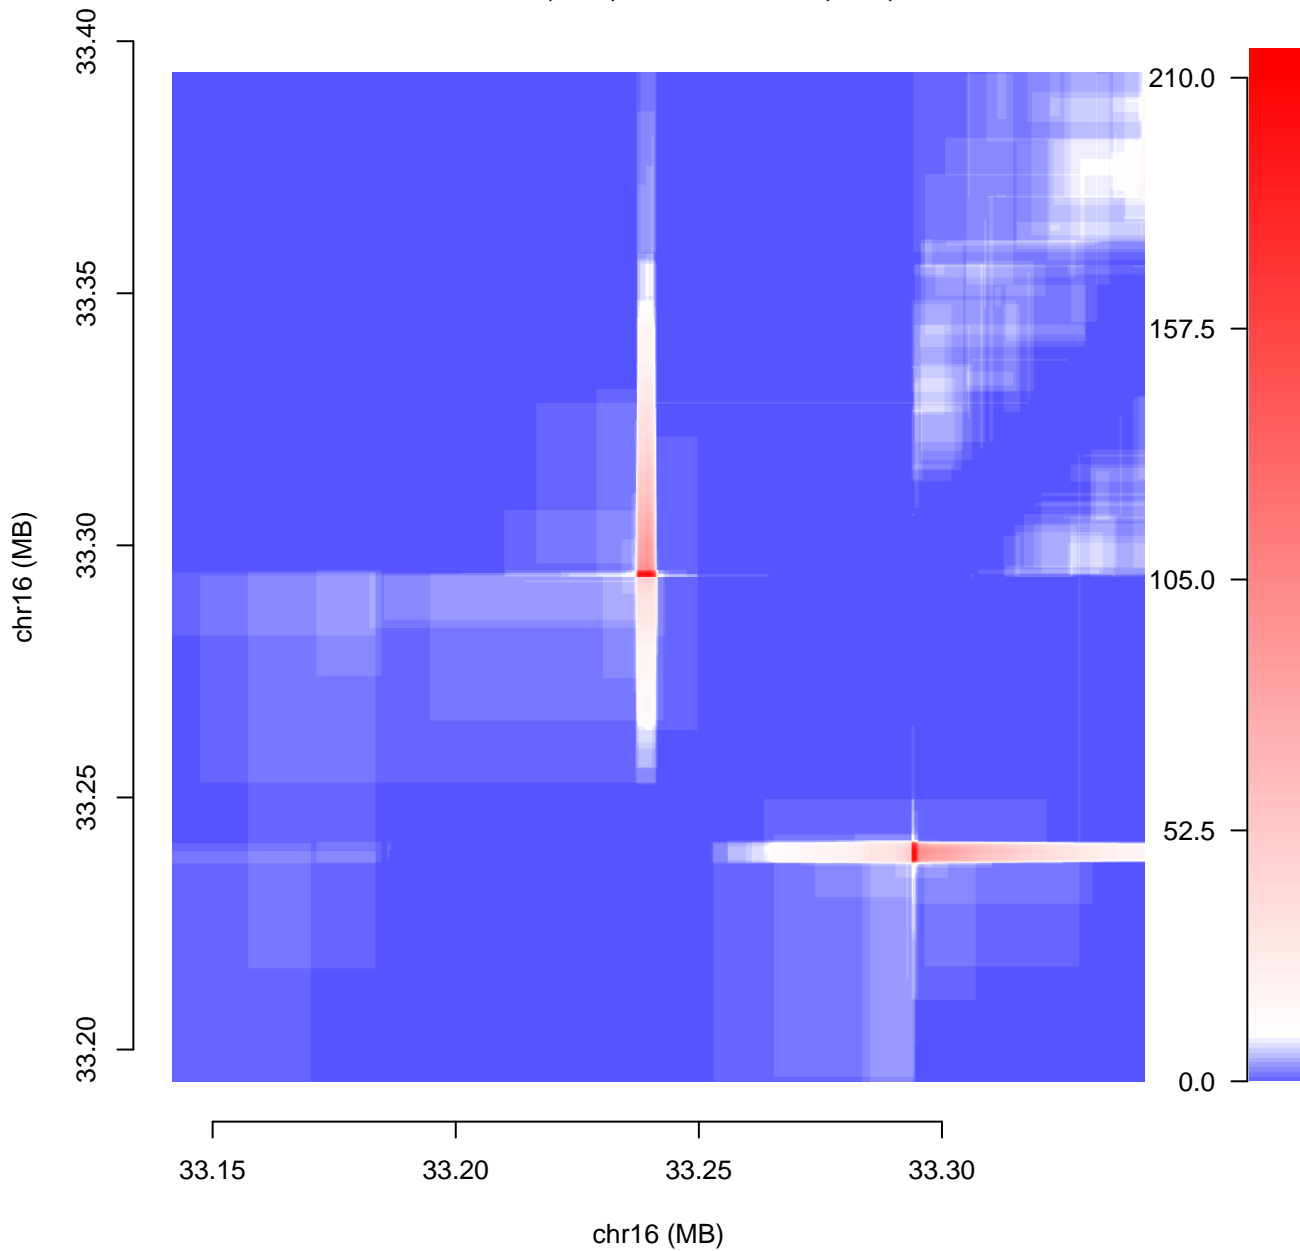

Supplement: Supplemental_Data.zip [file event_559.pdf › event_559.pdf]

Barcode

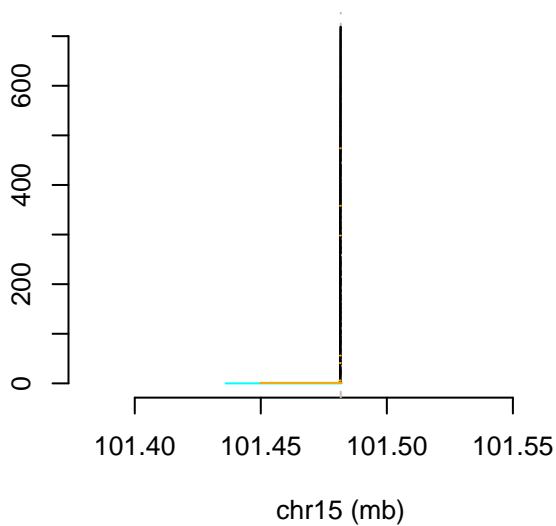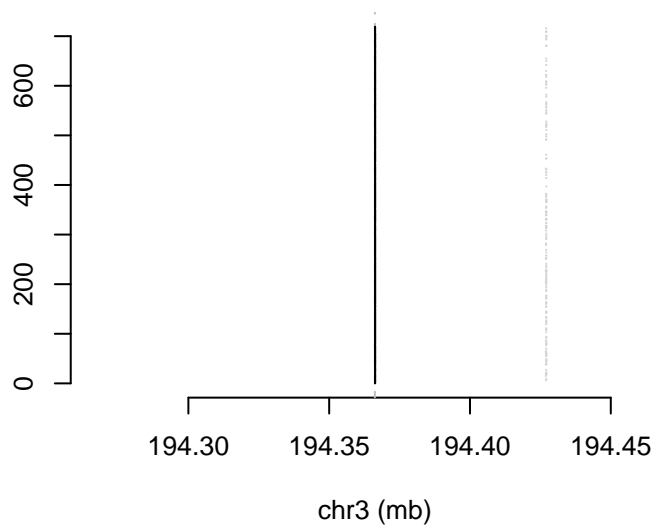

Copy number

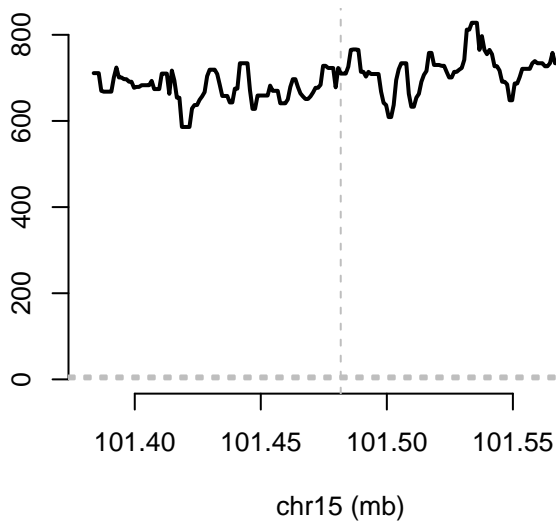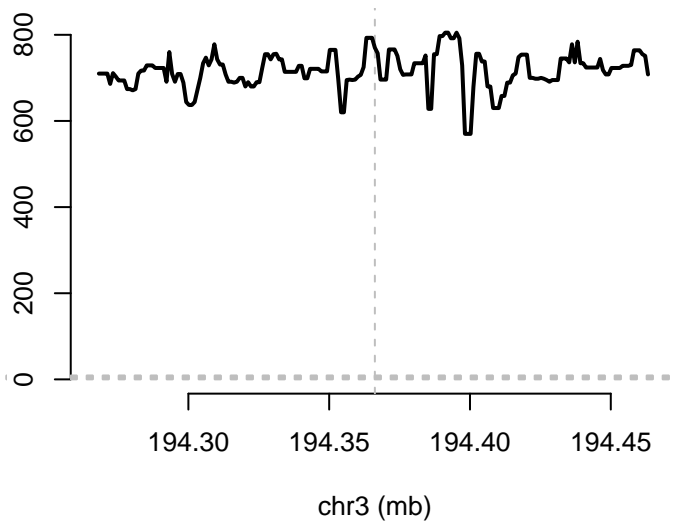

K562 chr15:101,481,716::chr3:194,366,220+-

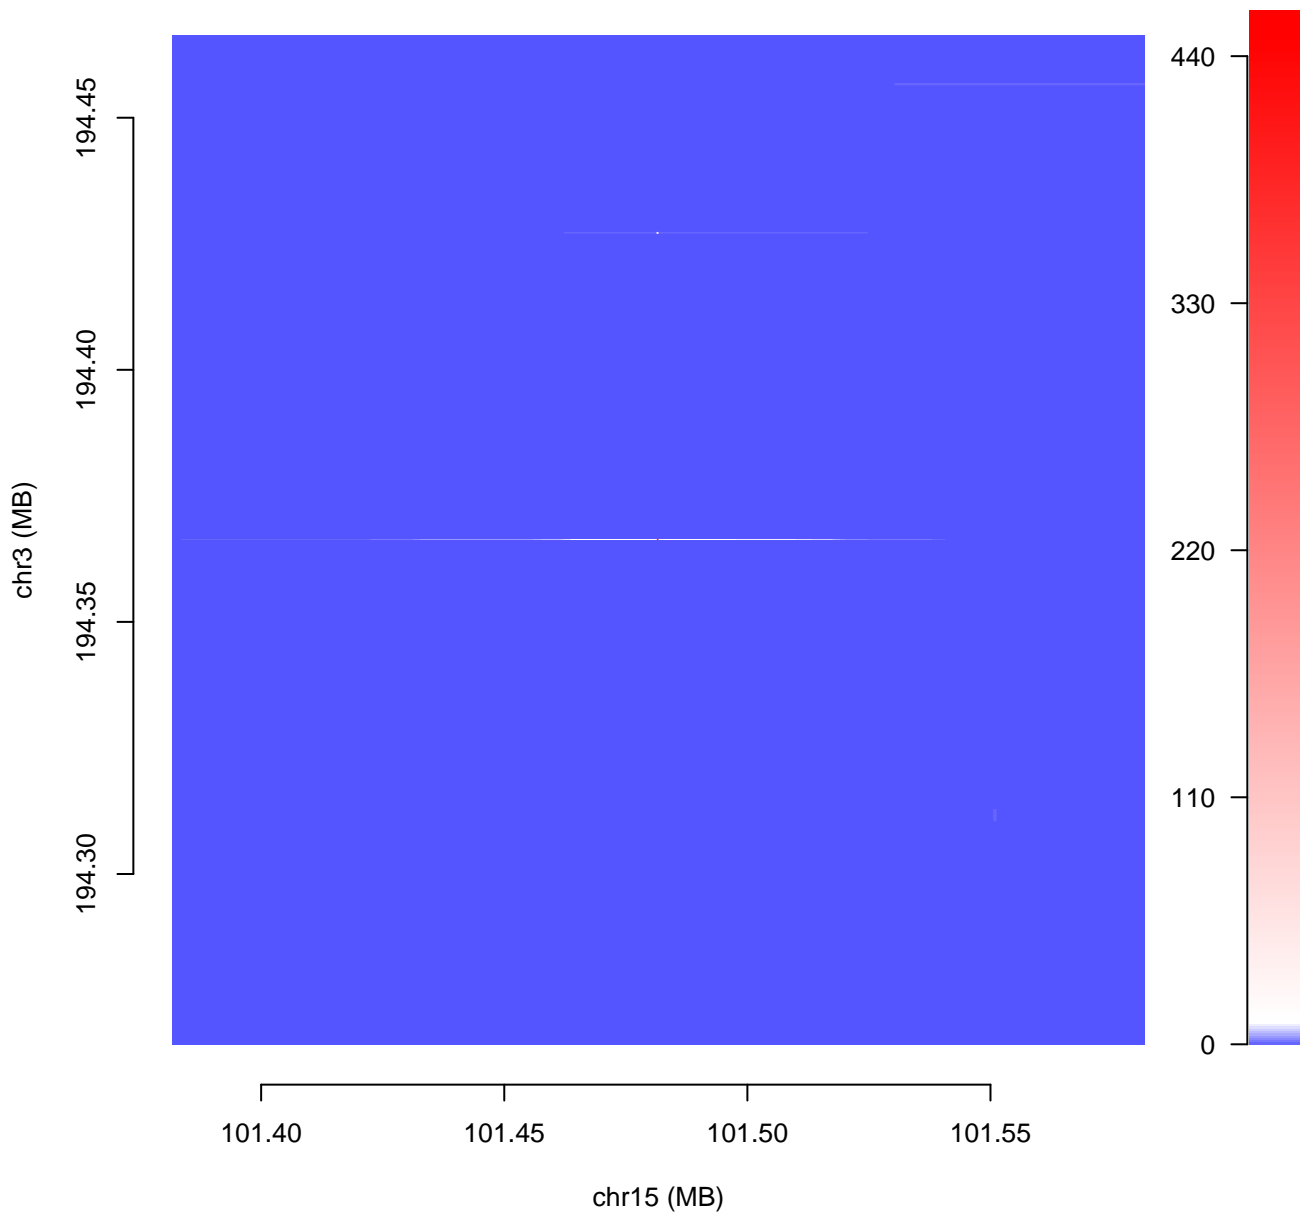

Supplement: Supplemental_Data.zip [file event_56.pdf › event_56.pdf]

Barcode

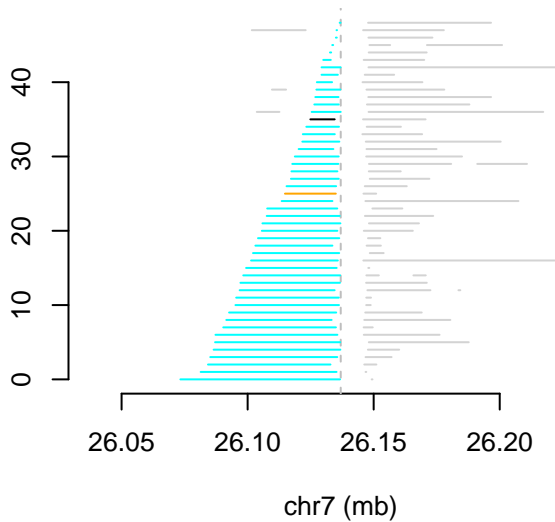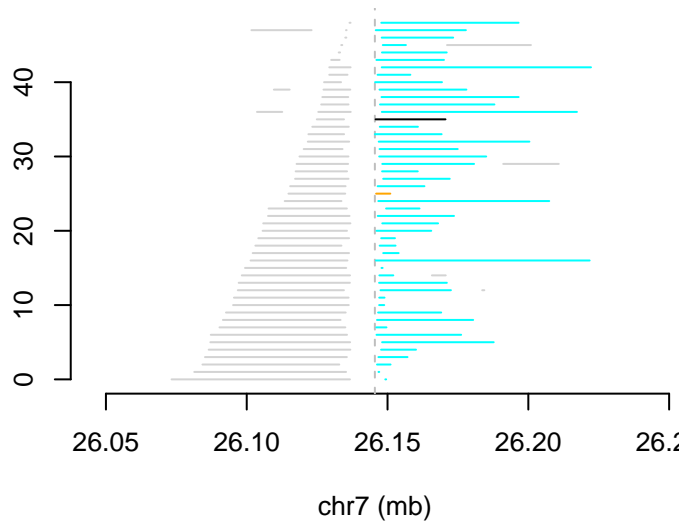

Copy number

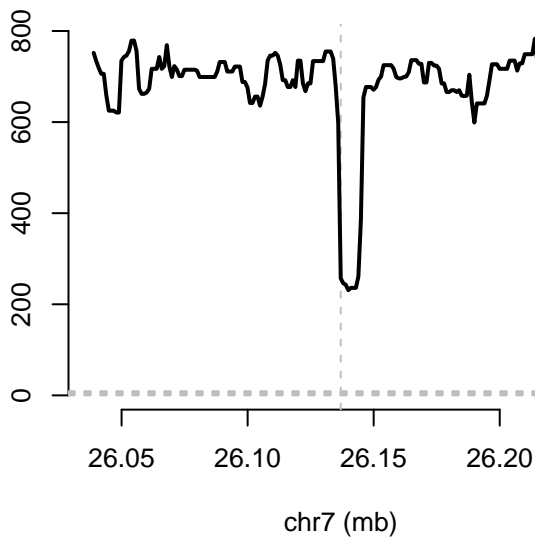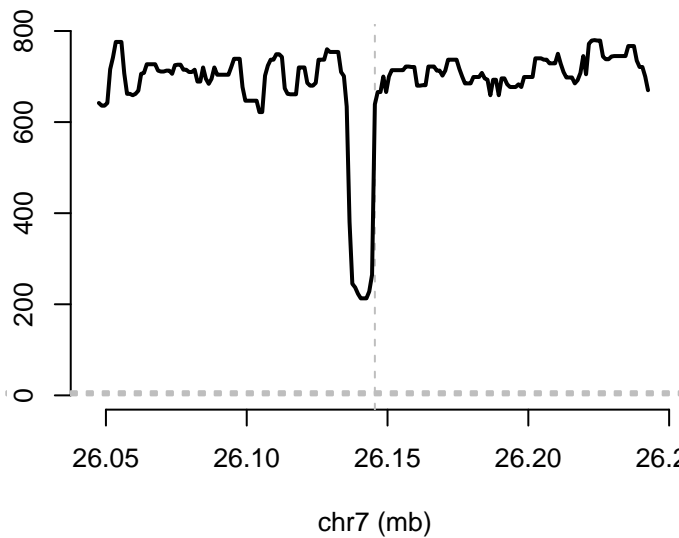

K562 chr7:26,136,937::chr7:26,145,507+-

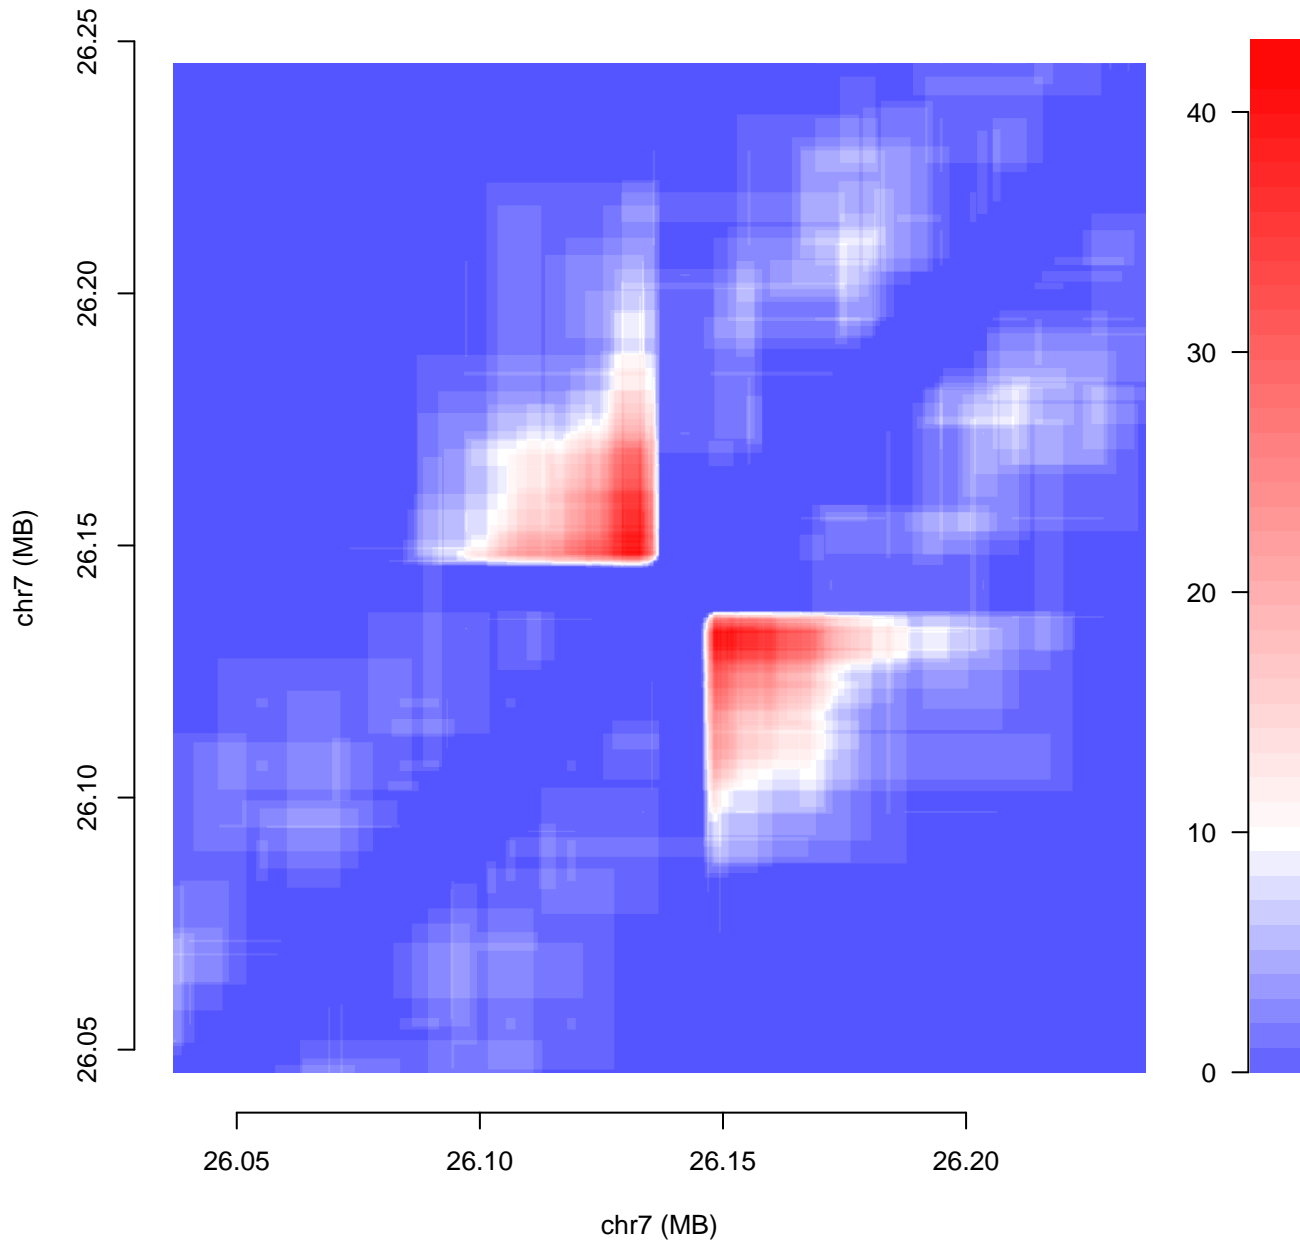

Supplement: Supplemental_Data.zip [file event_560.pdf › event_560.pdf]

Barcode

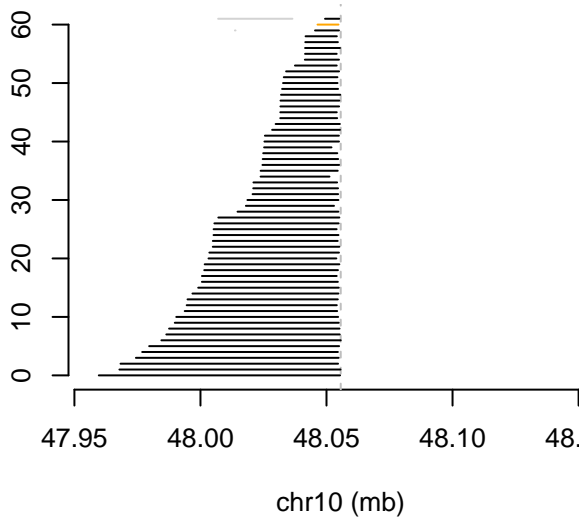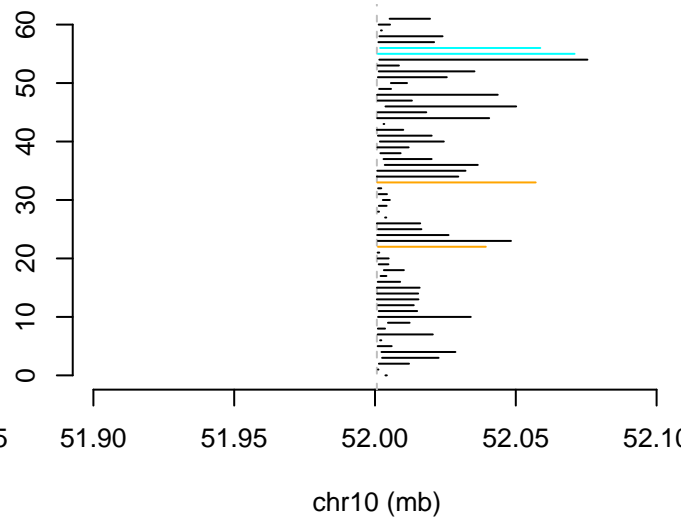

Copy number

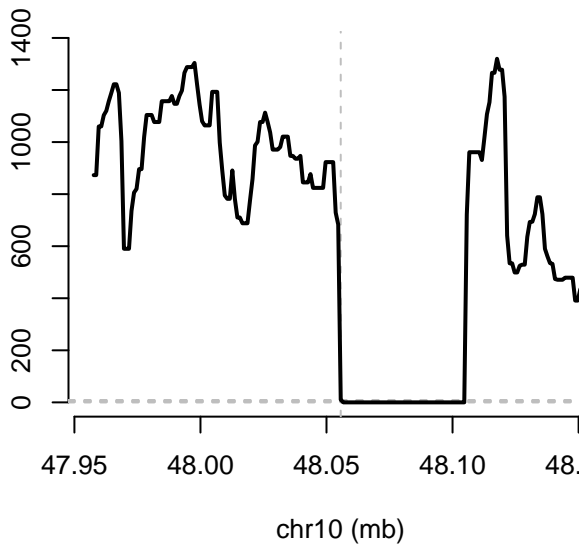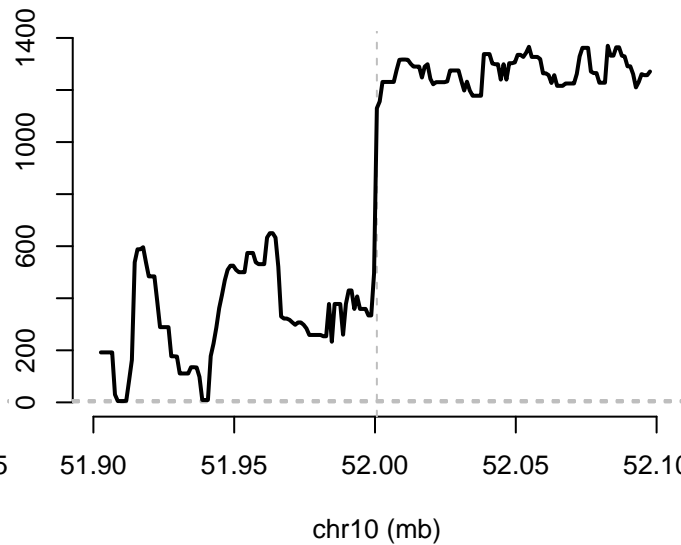

K562 chr10:52,000,664::chr10:48,055,651-+

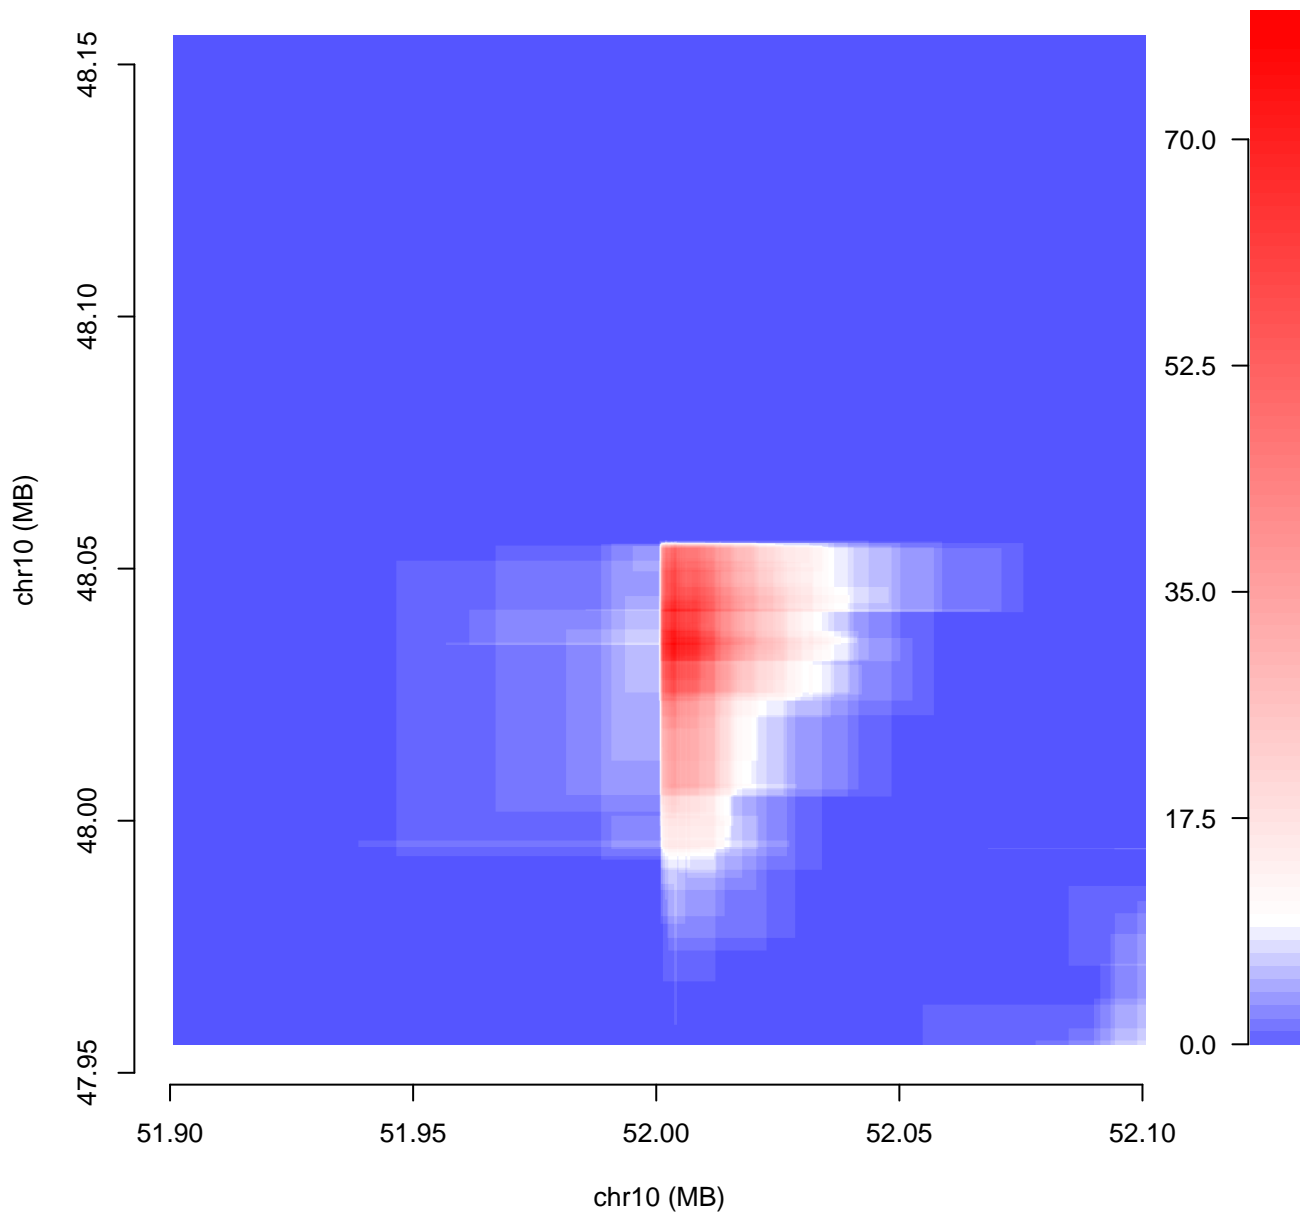

Supplement: Supplemental_Data.zip [file event_561.pdf › event_561.pdf]

Barcode

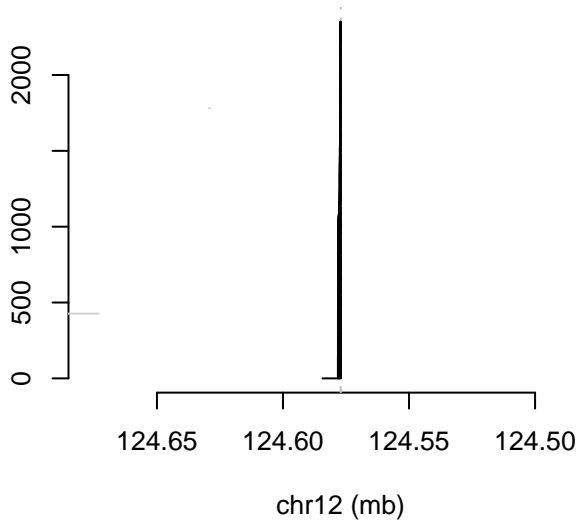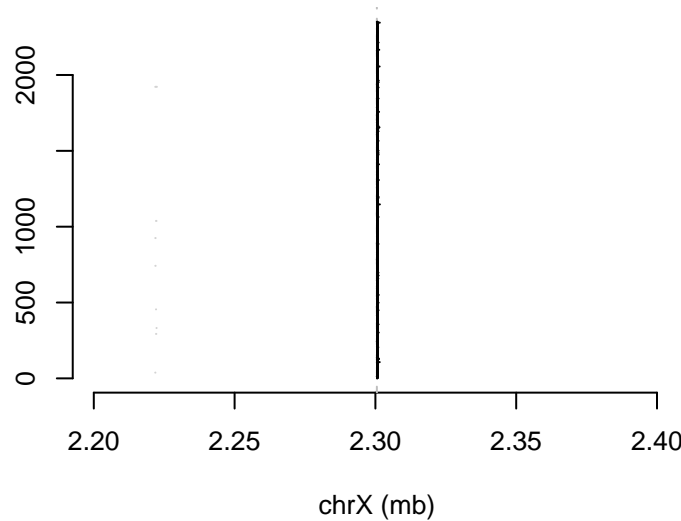

Copy number

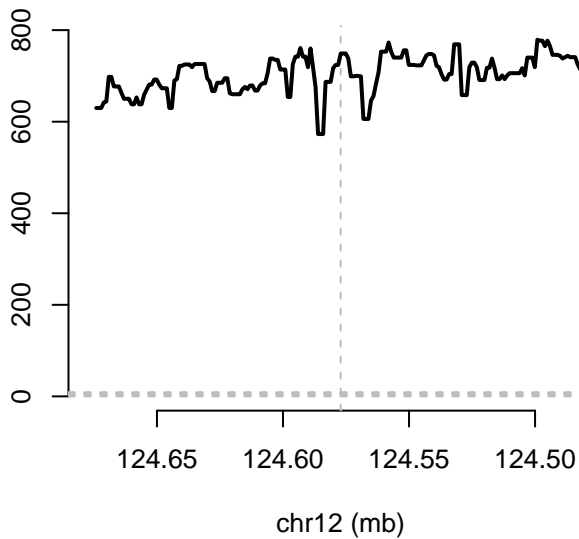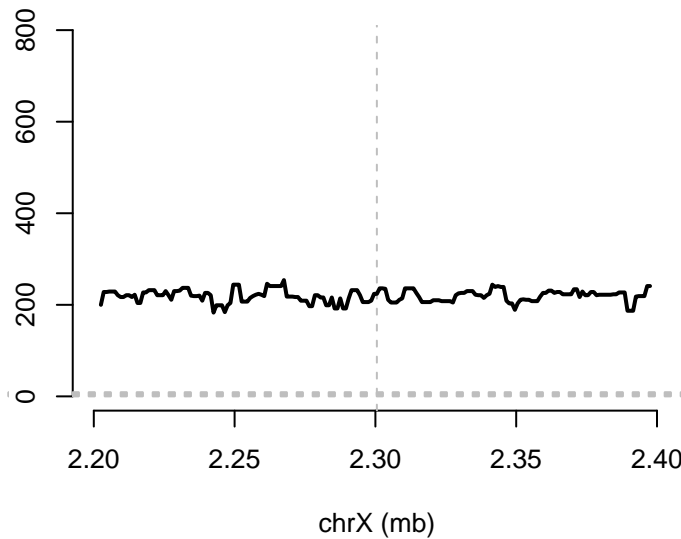

K562 chrX:2,300,522::chr12:124,577,088--

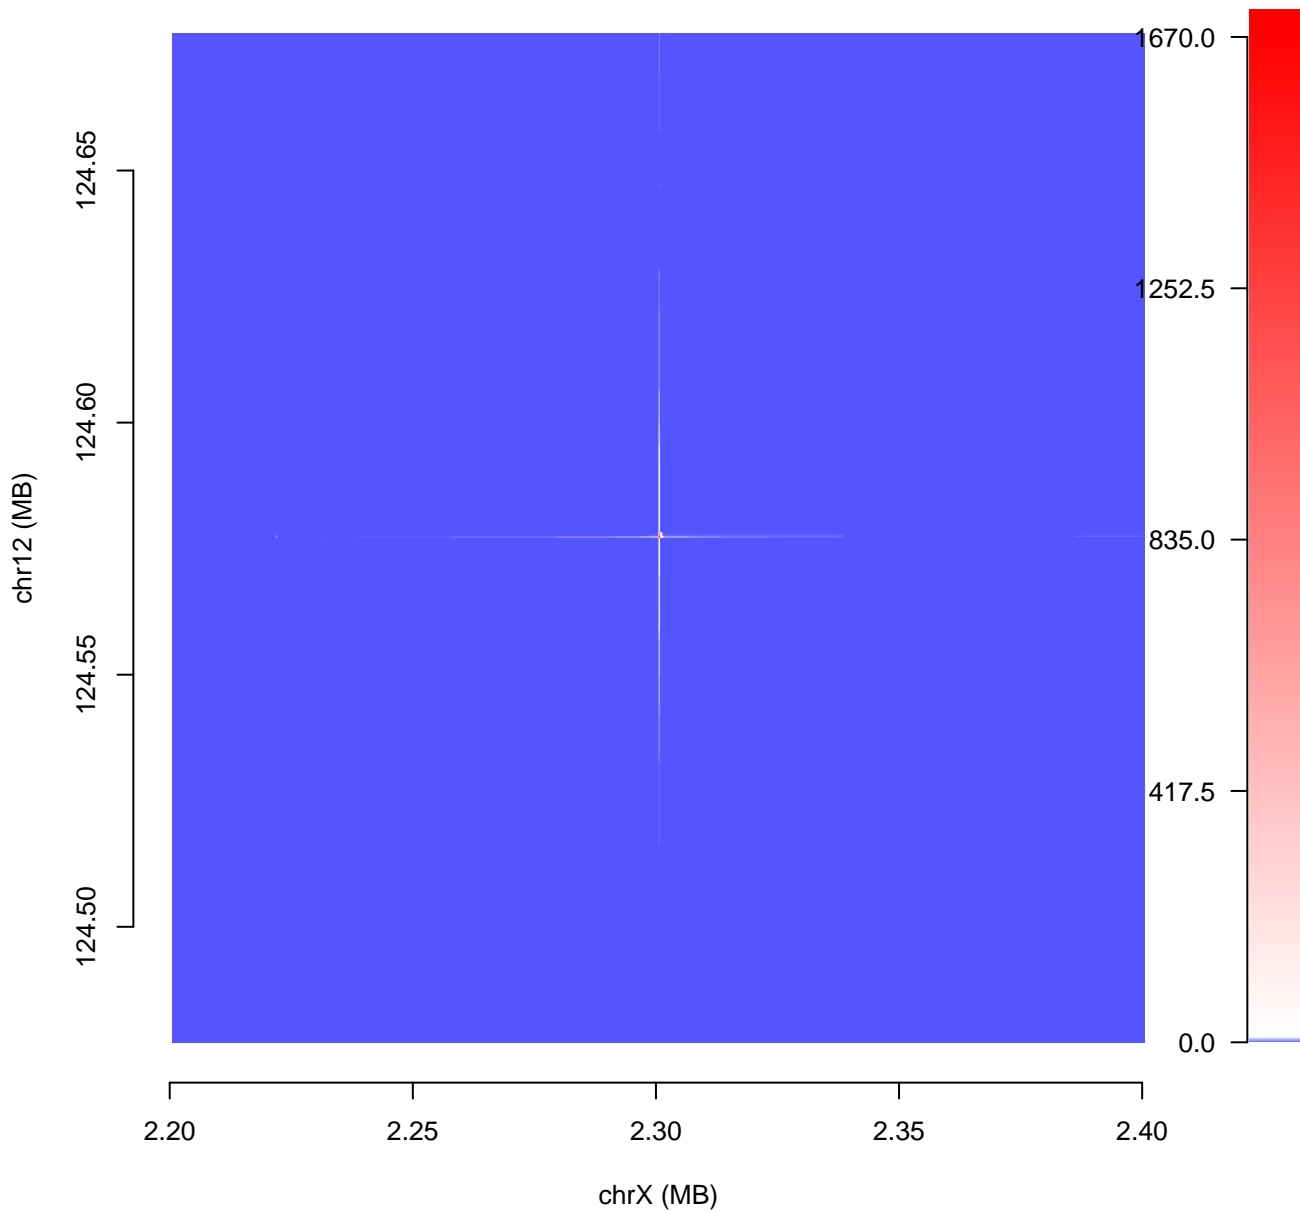

Supplement: Supplemental_Data.zip [file event_562.pdf › event_562.pdf]

Barcode

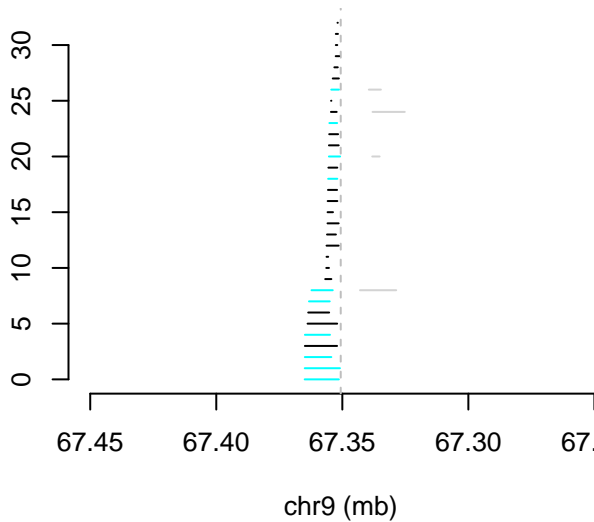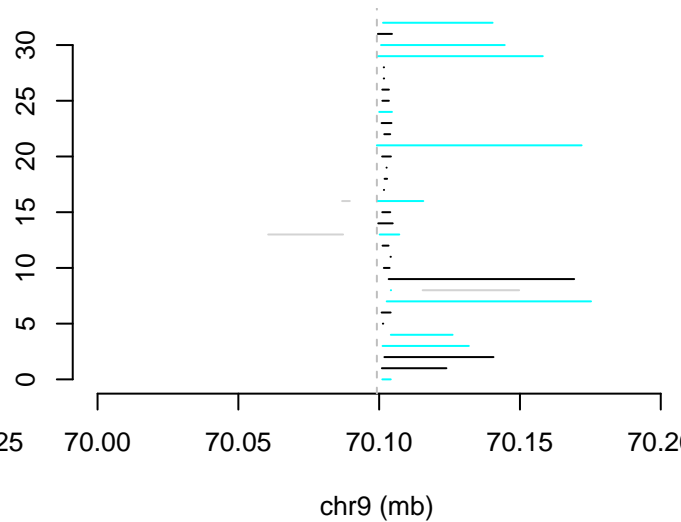

Copy number

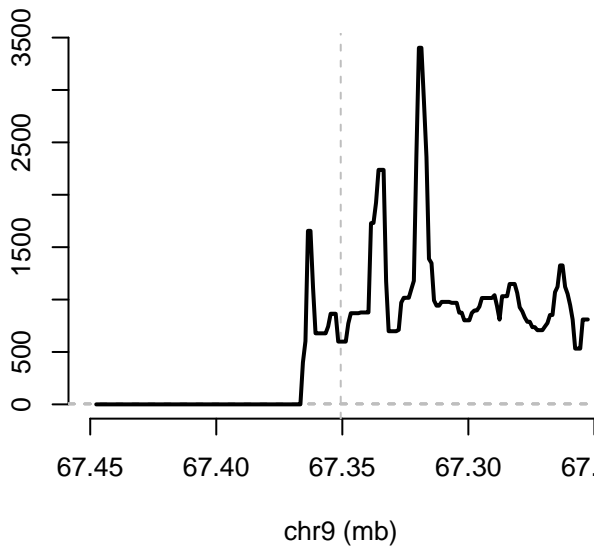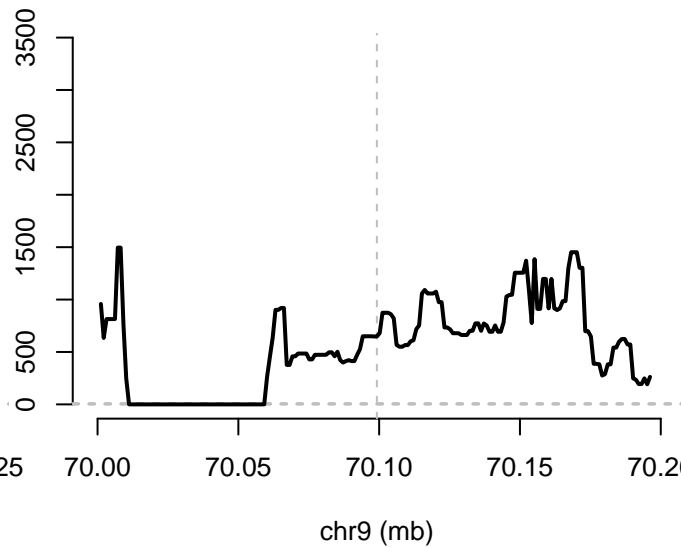

K562 chr9:70,099,190::chr9:67,350,627--

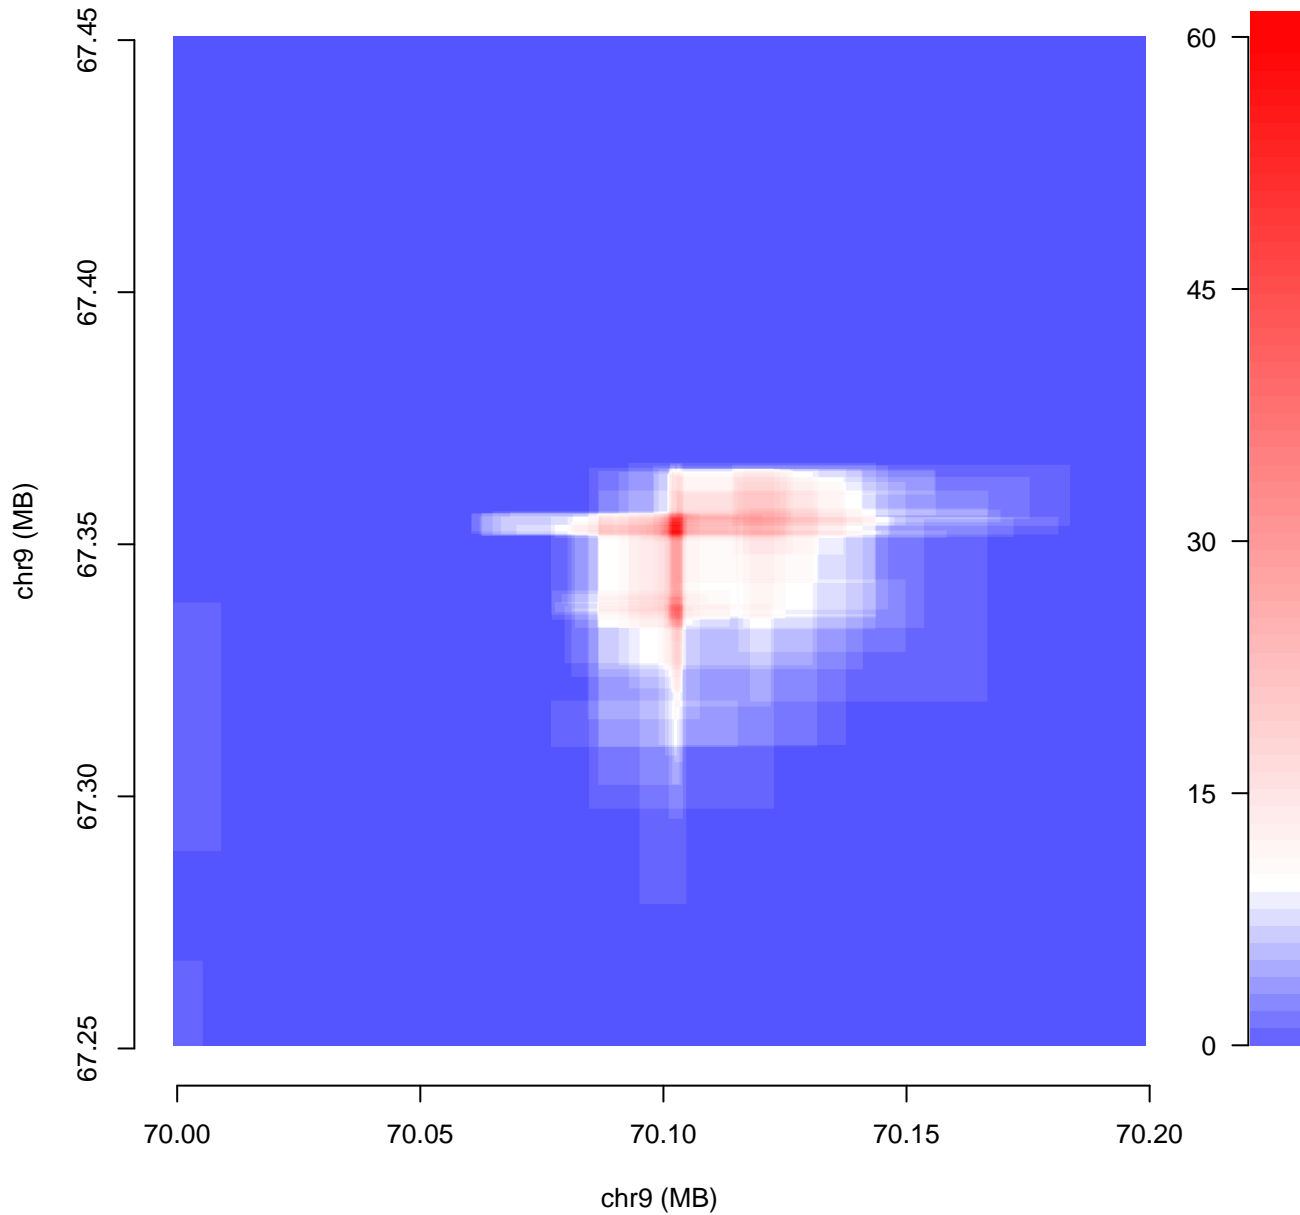

Supplement: Supplemental_Data.zip [file event_563.pdf › event_563.pdf]

Barcode

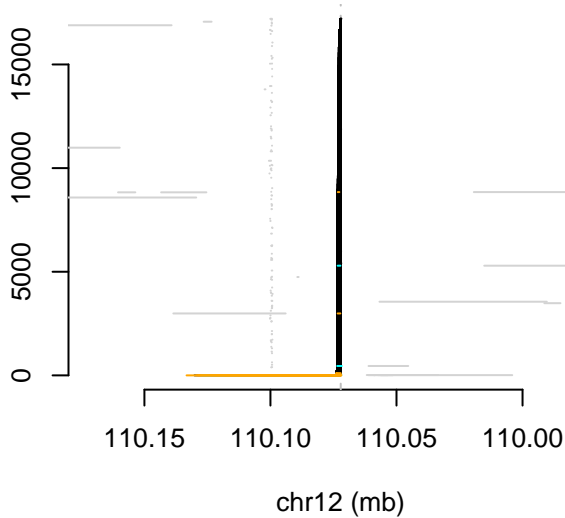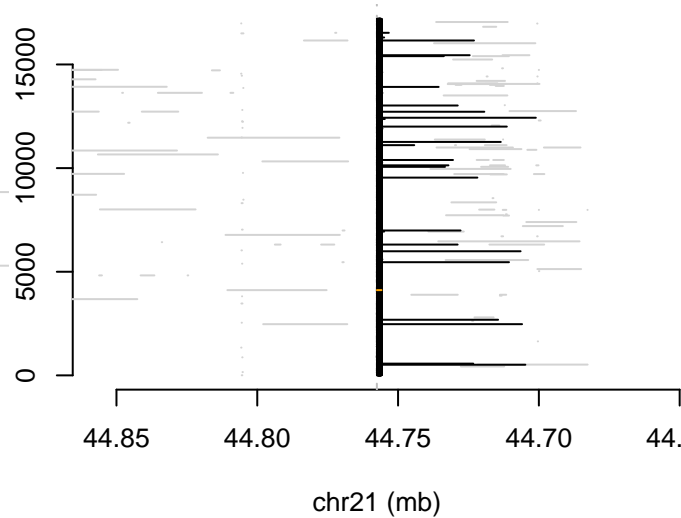

Copy number

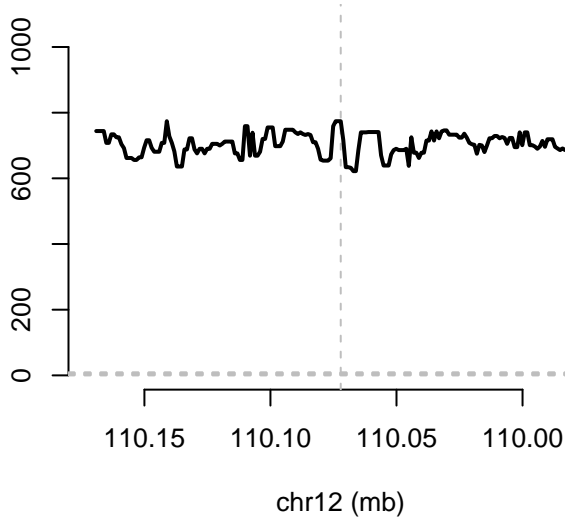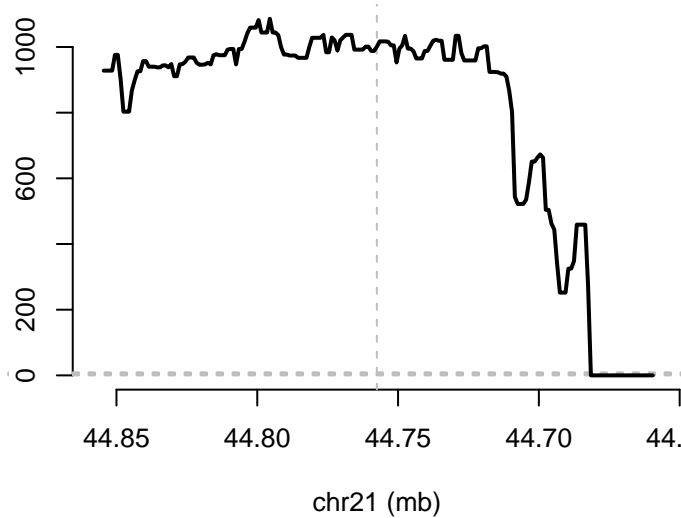

K562 chr12:110,072,115::chr21:44,757,527-+

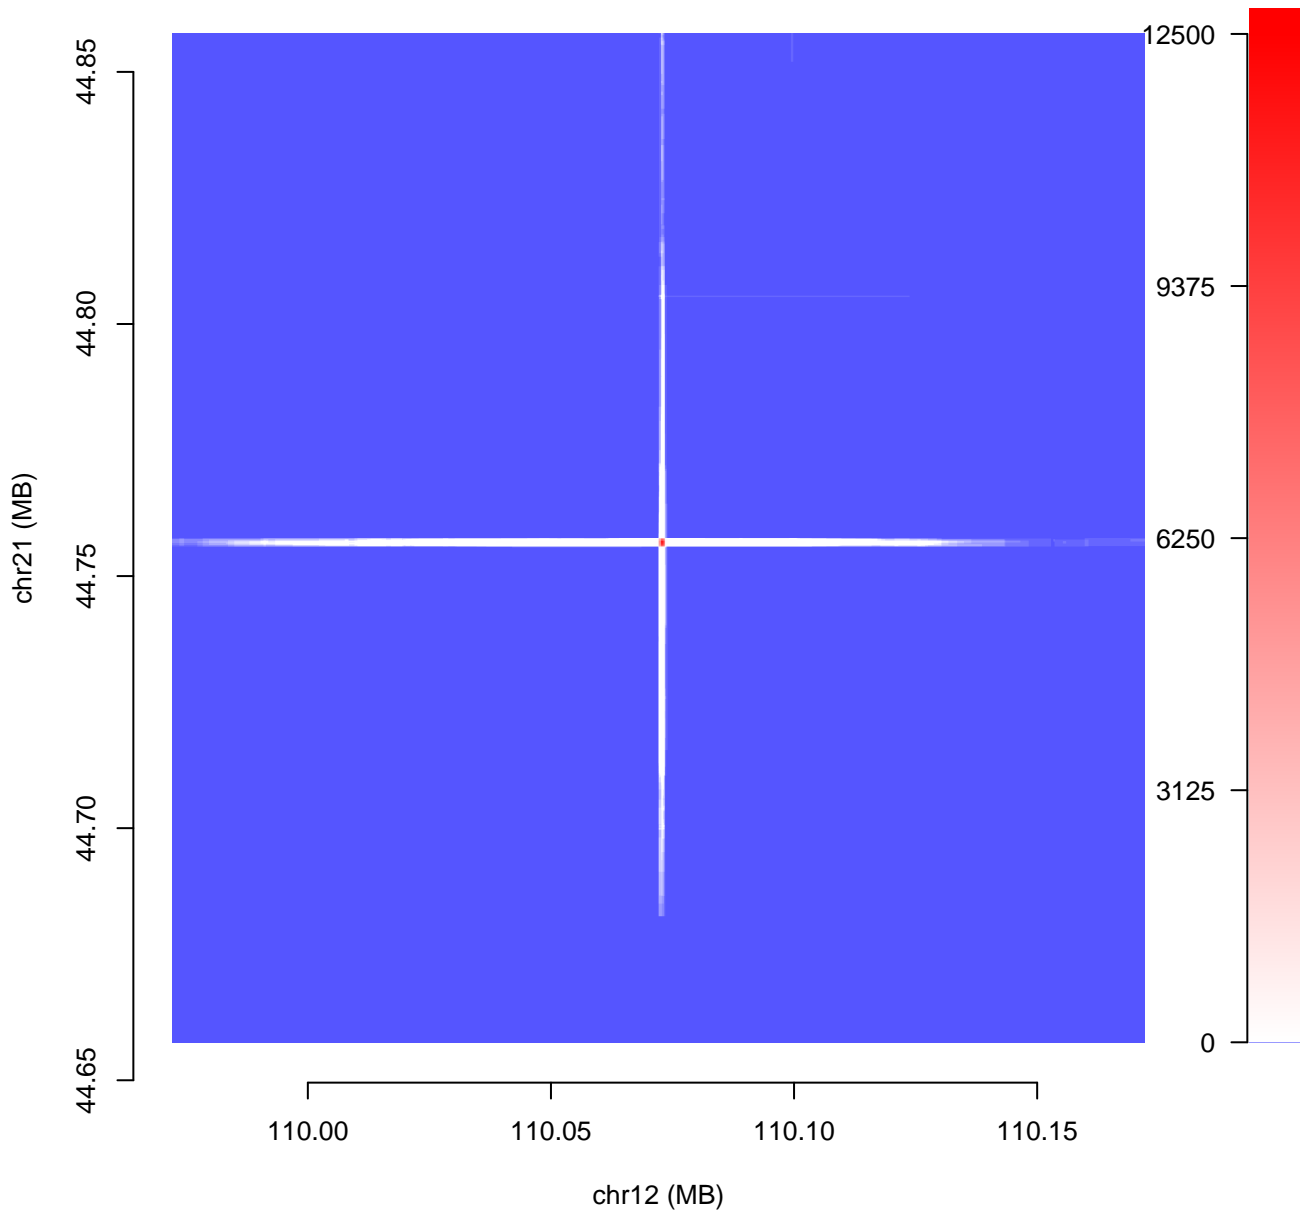

Supplement: Supplemental_Data.zip [file event_564.pdf › event_564.pdf]

Barcode

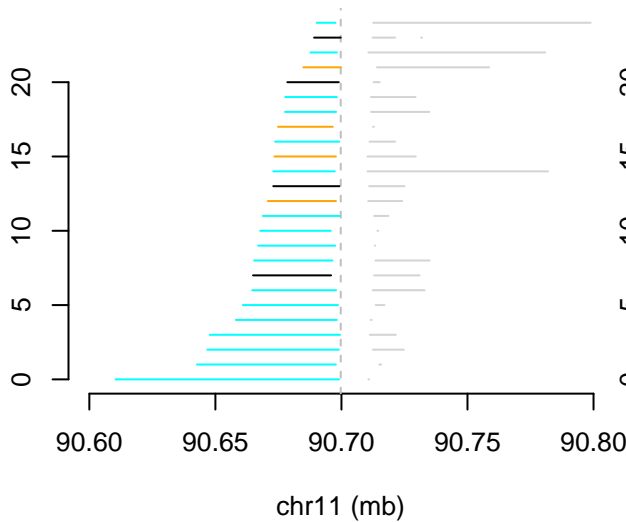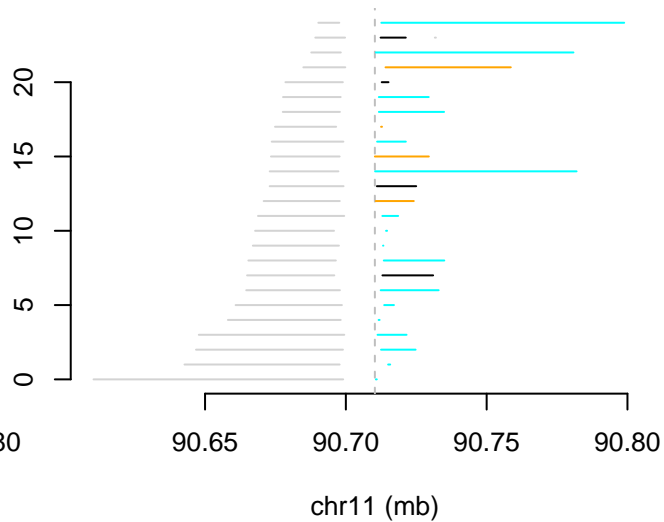

Copy number

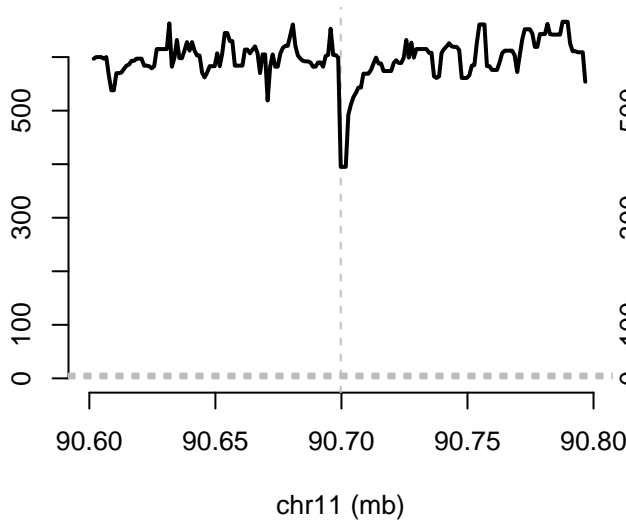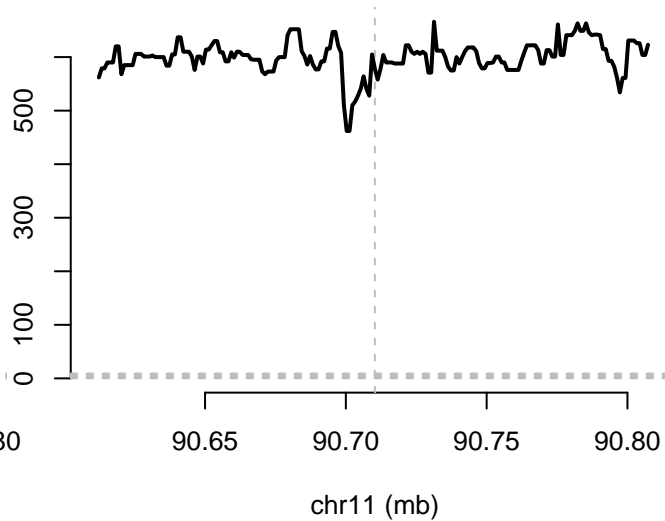

K562 chr11:90,699,722::chr11:90,710,306+-

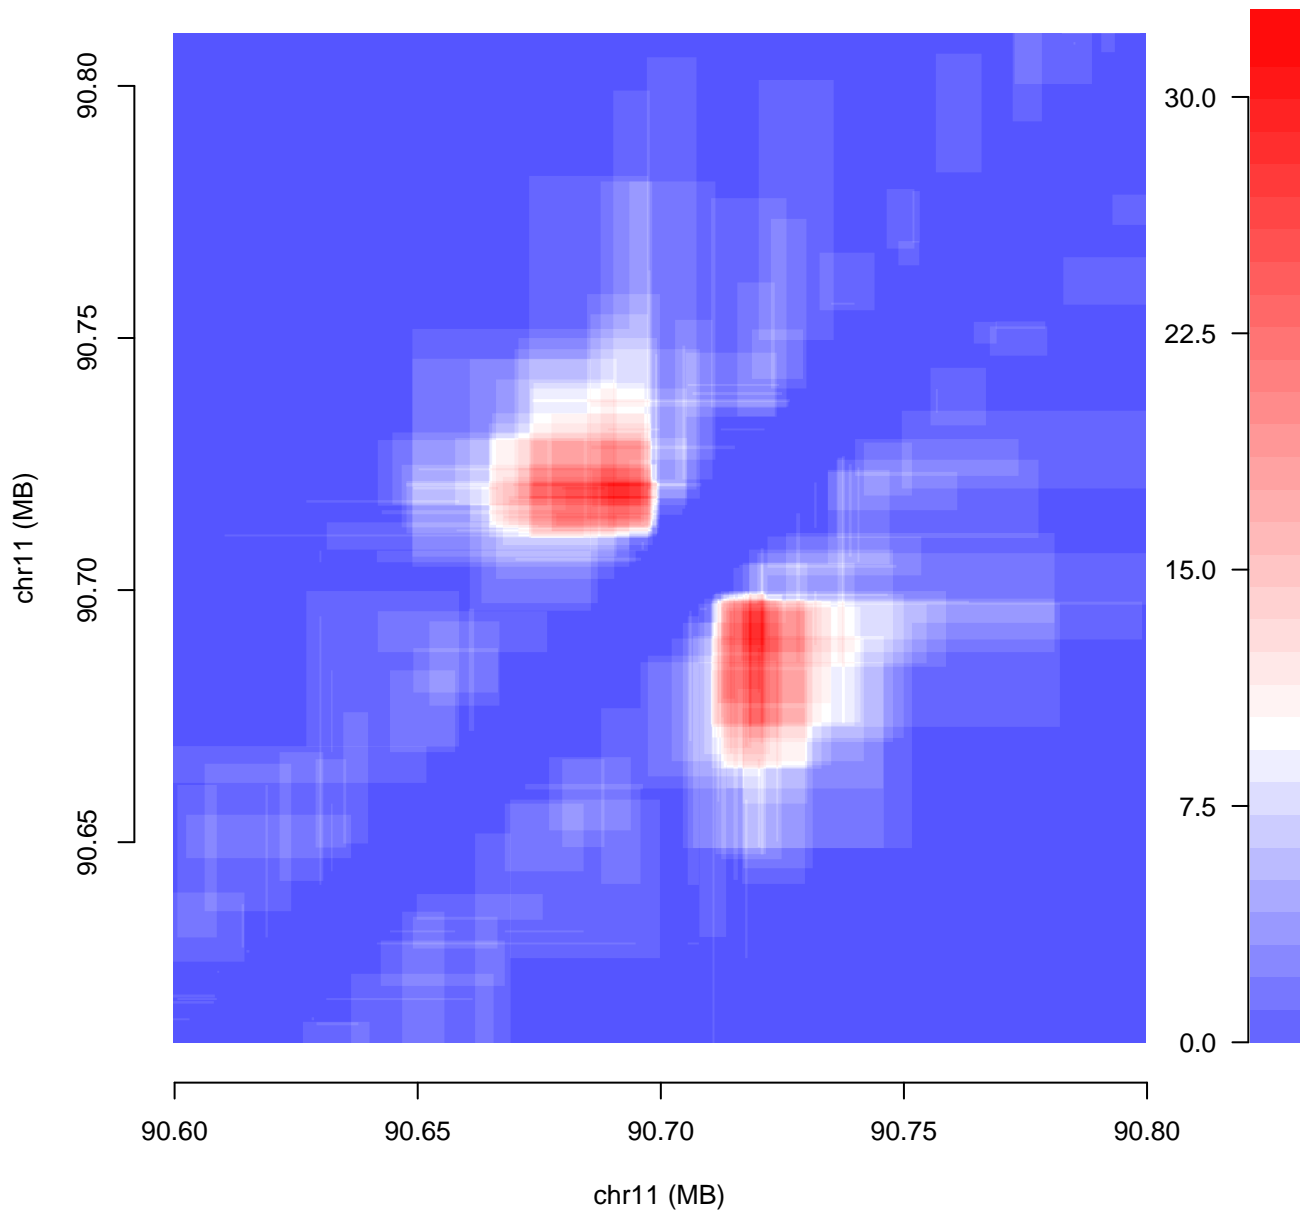

Supplement: Supplemental_Data.zip [file event_565.pdf › event_565.pdf]

Barcode

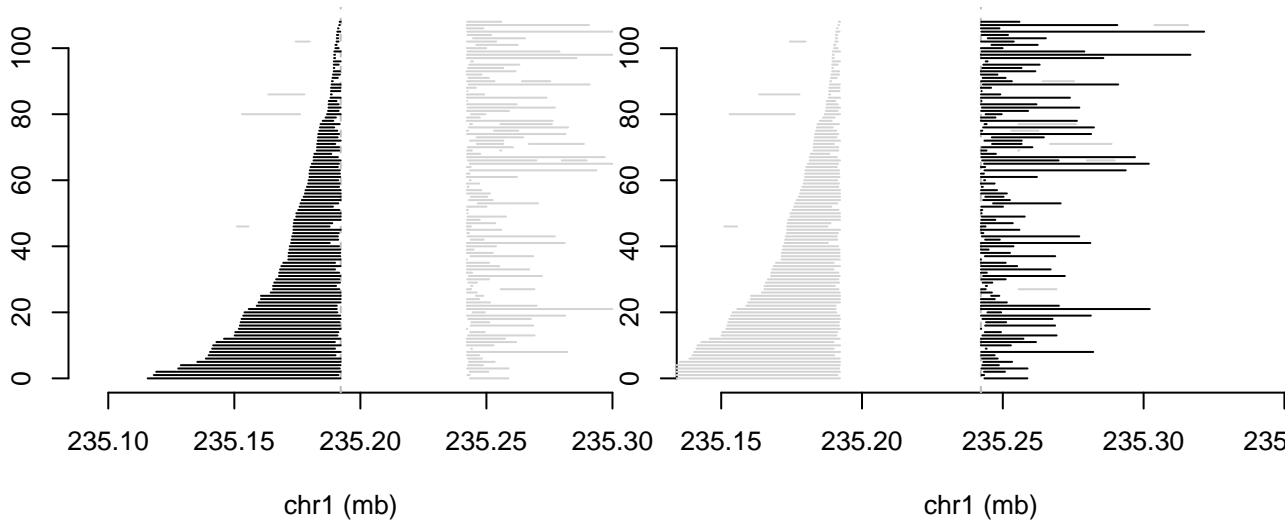

Copy number

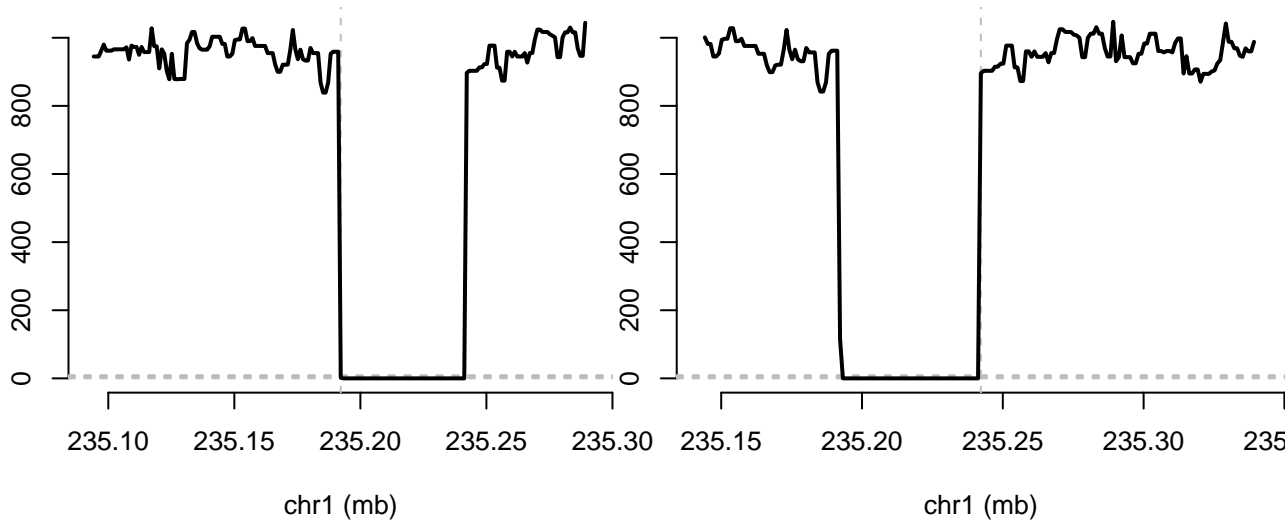

K562 chr1:235,192,211::chr1:235,242,210+-

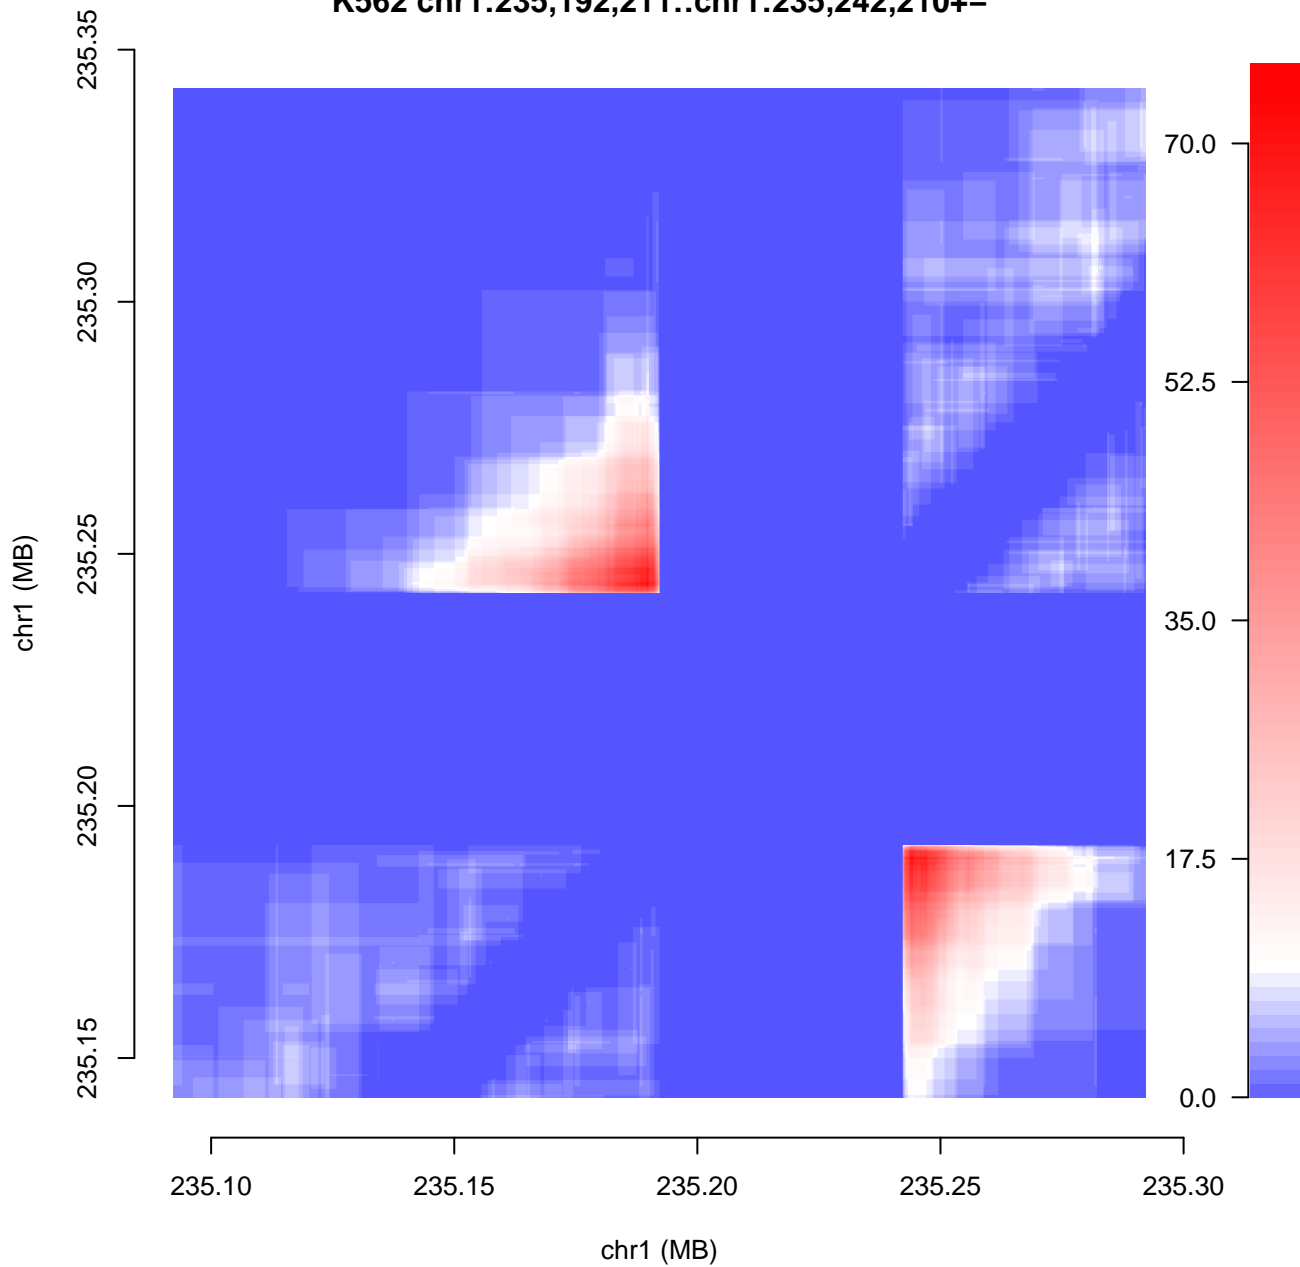

Supplement: Supplemental_Data.zip [file event_566.pdf › event_566.pdf]

Barcode

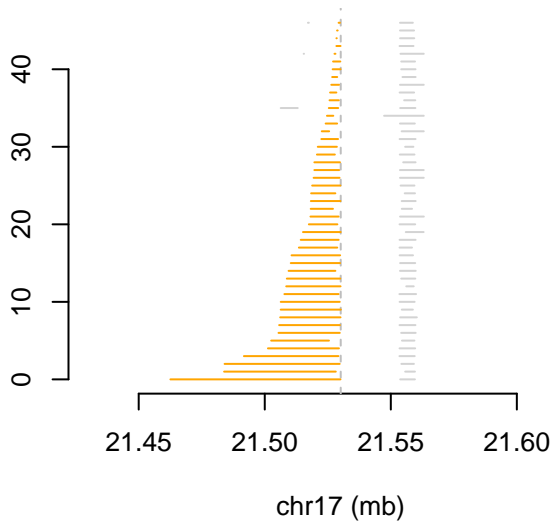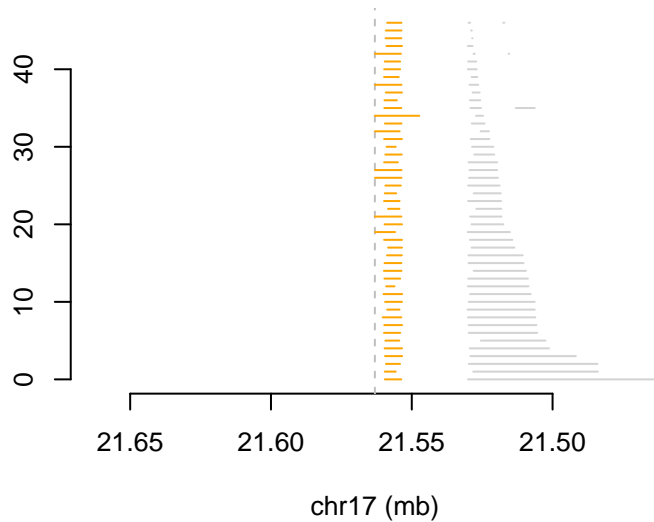

Copy number

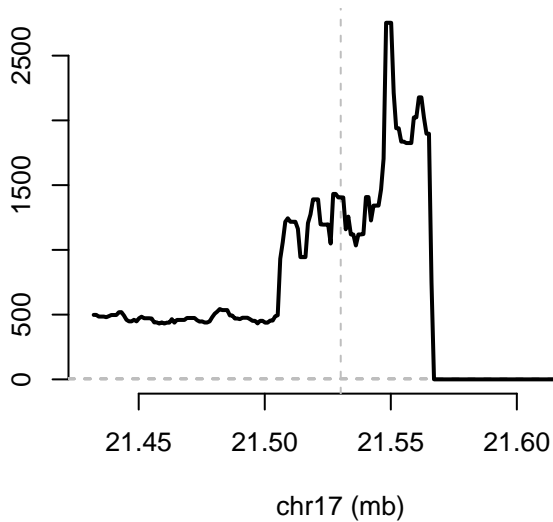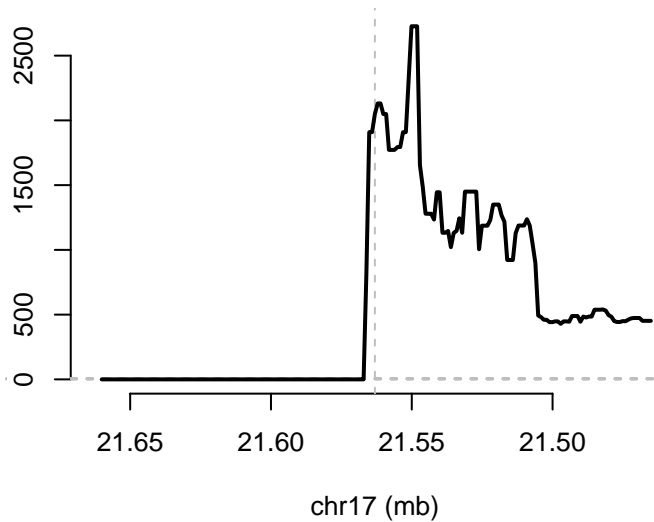

K562 chr17:21,563,107::chr17:21,530,142++

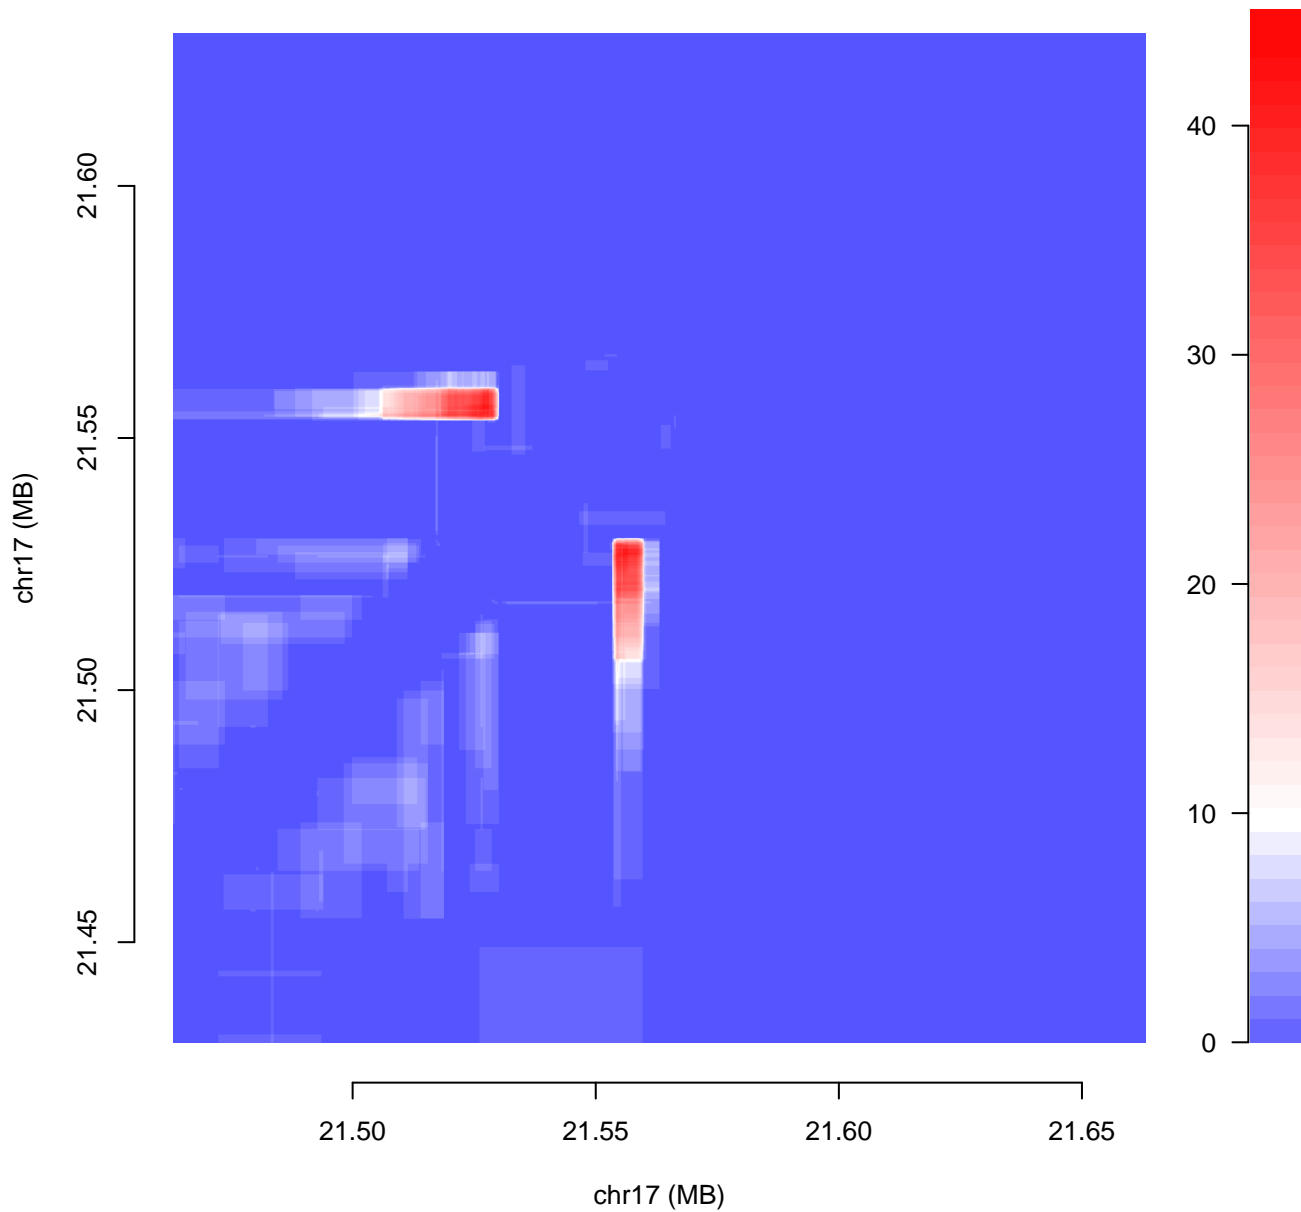

Supplement: Supplemental_Data.zip [file event_567.pdf › event_567.pdf]

Barcode

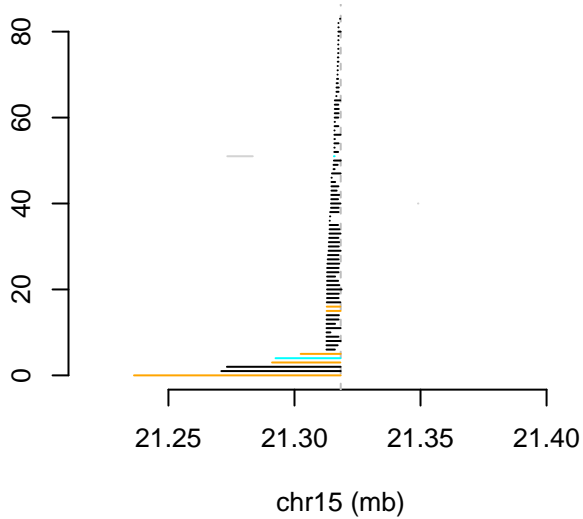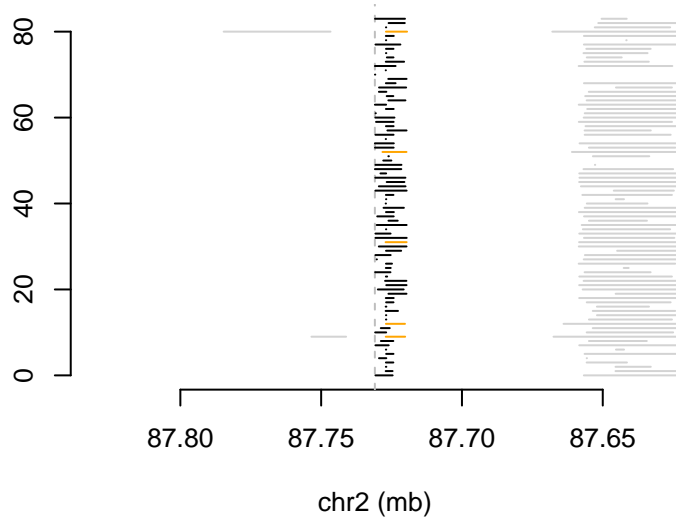

Copy number

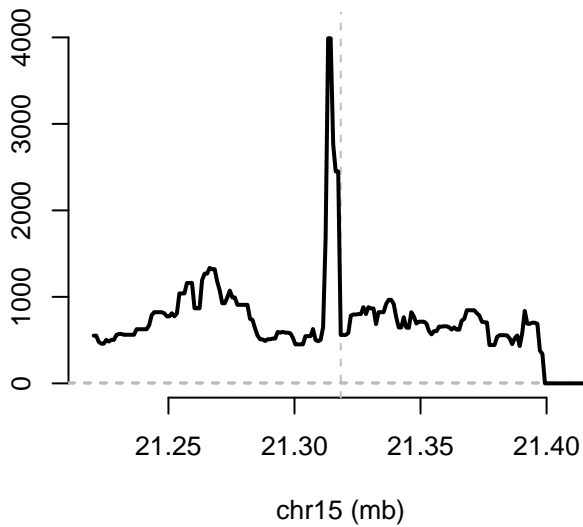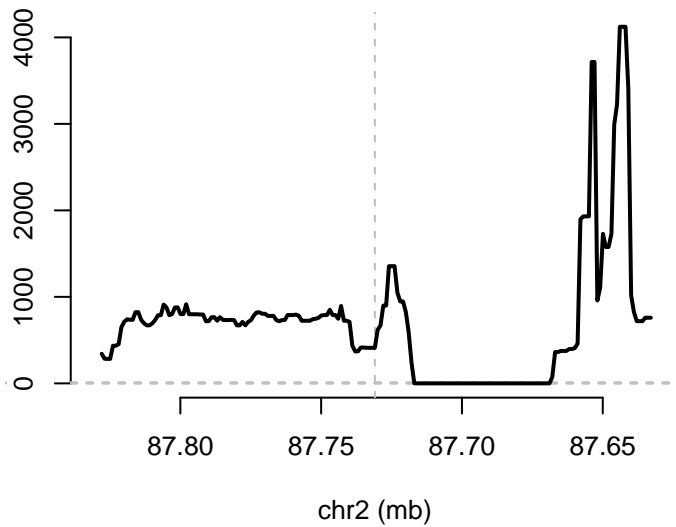

K562 chr2:87,730,927::chr15:21,318,352++

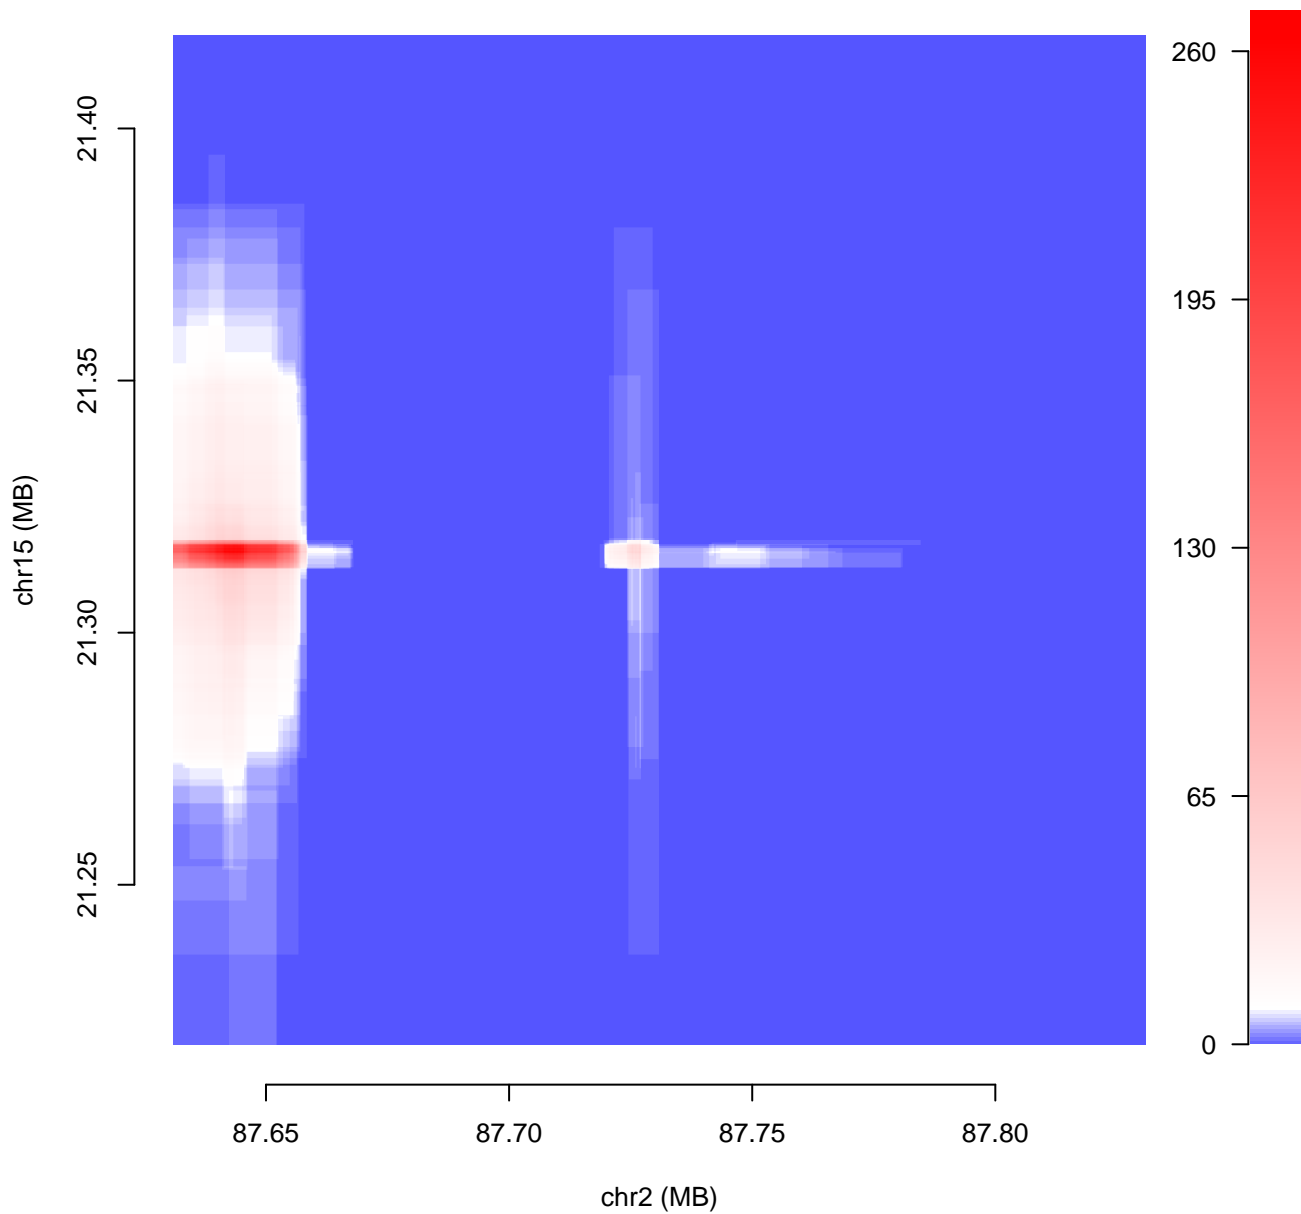

Supplement: Supplemental_Data.zip [file event_568.pdf › event_568.pdf]

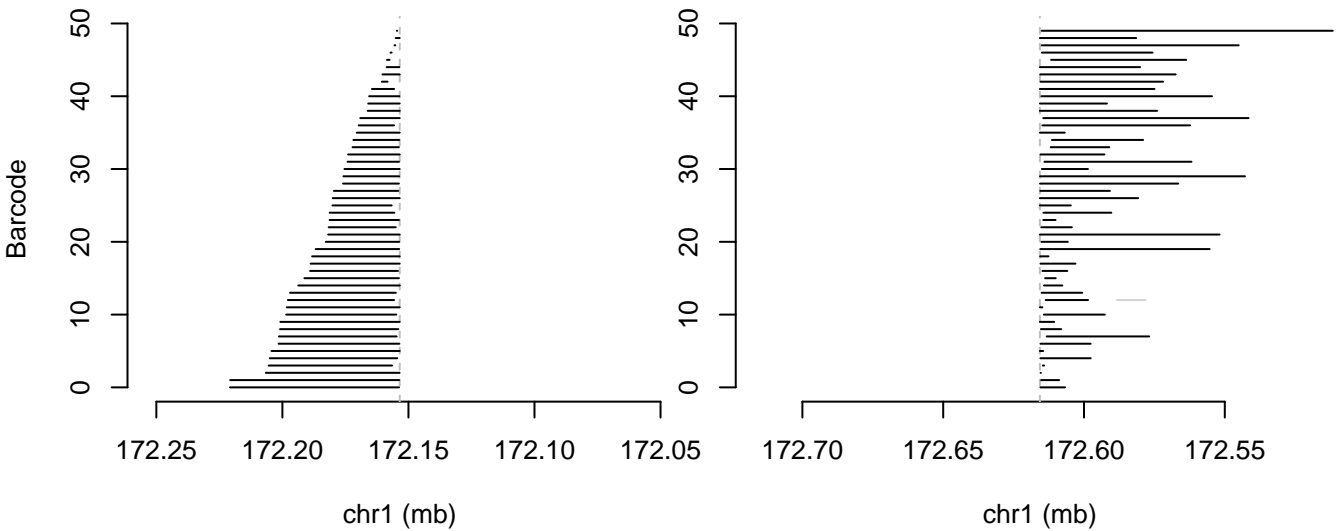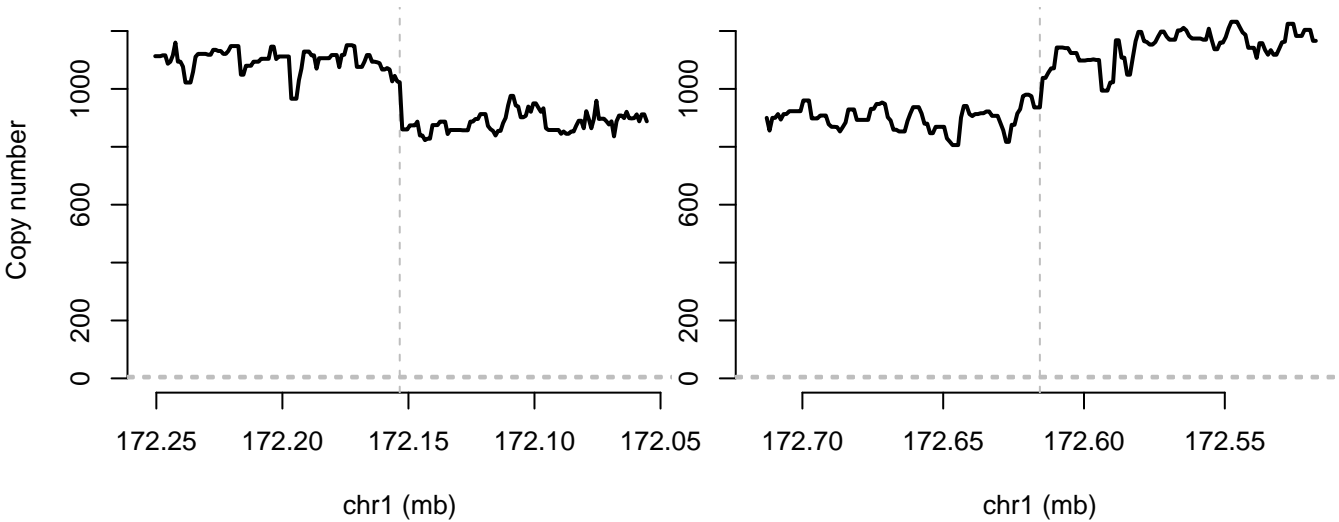

K562 chr1:172,153,452::chr1:172,615,672-+

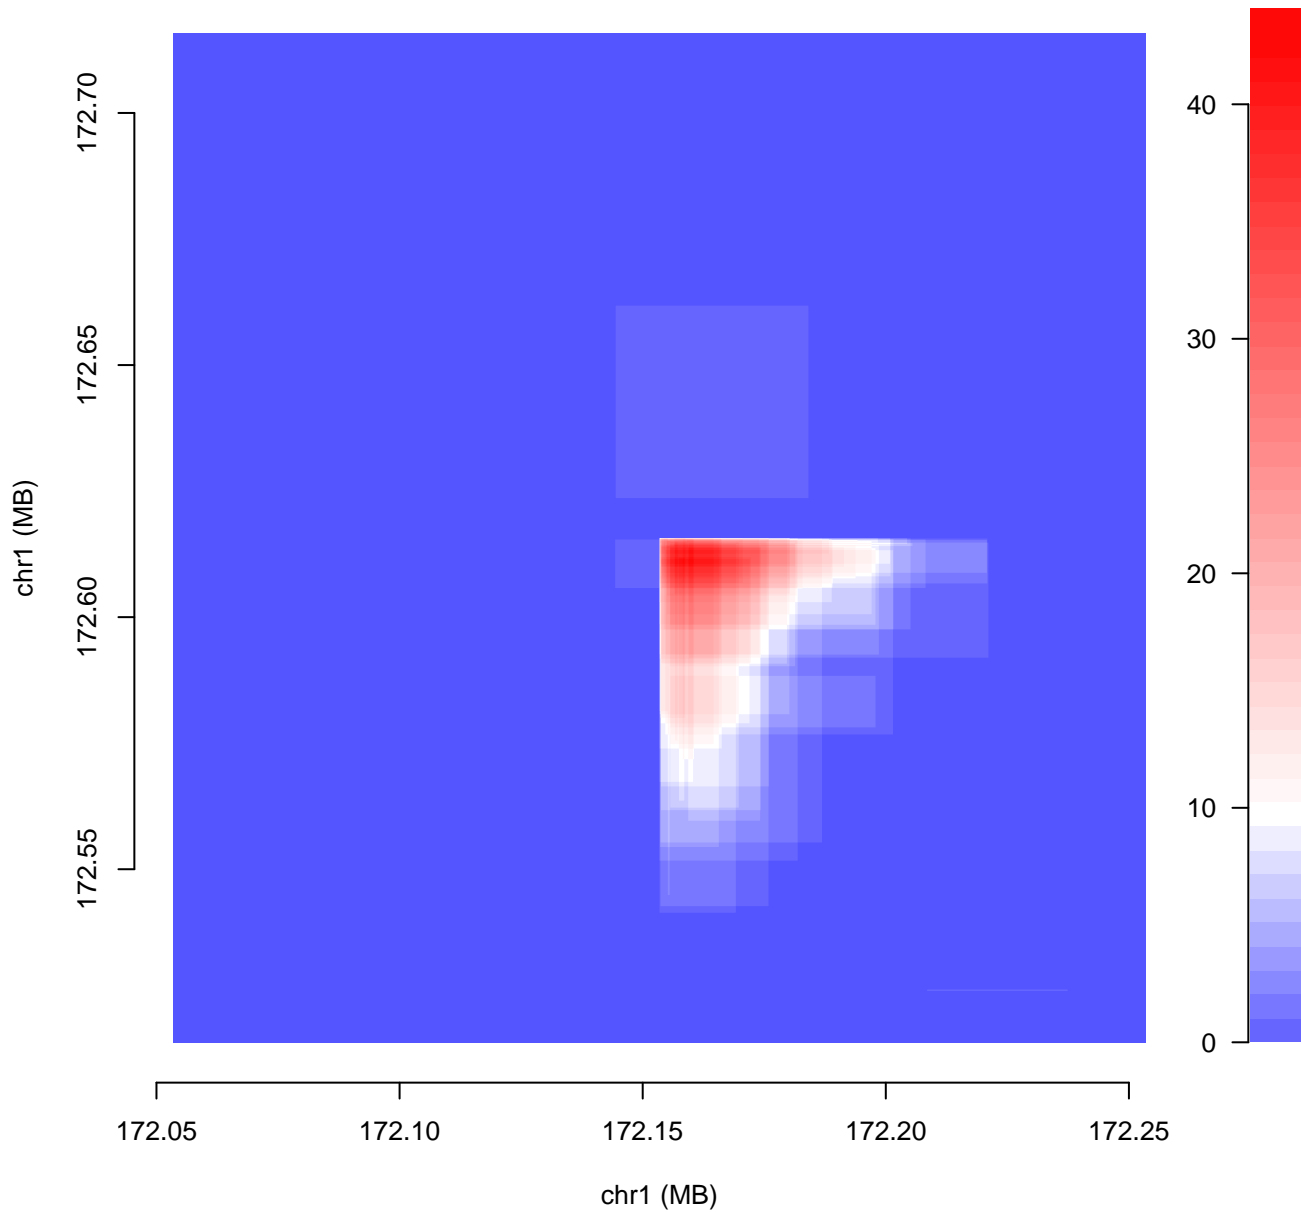

Supplement: Supplemental_Data.zip [file event_569.pdf › event_569.pdf]

Barcode

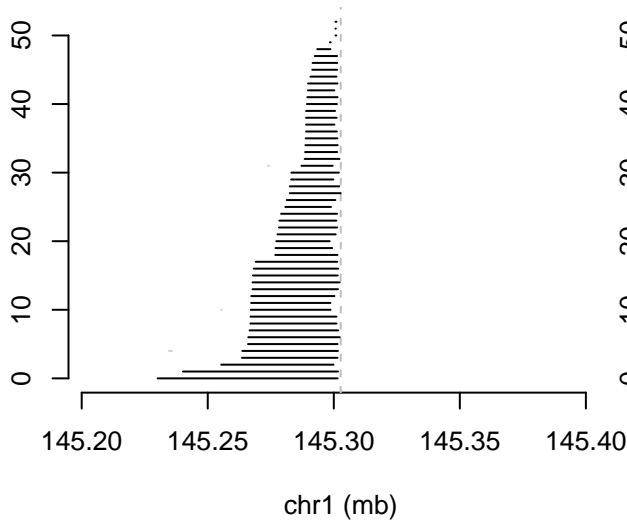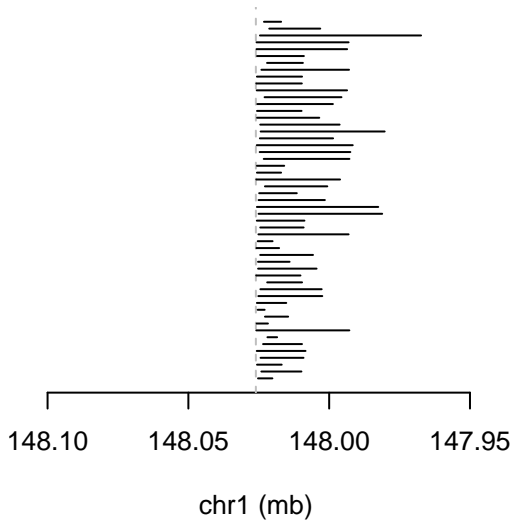

Copy number

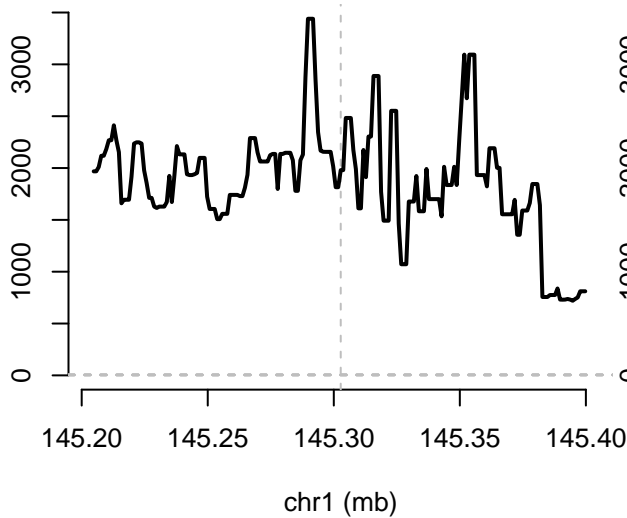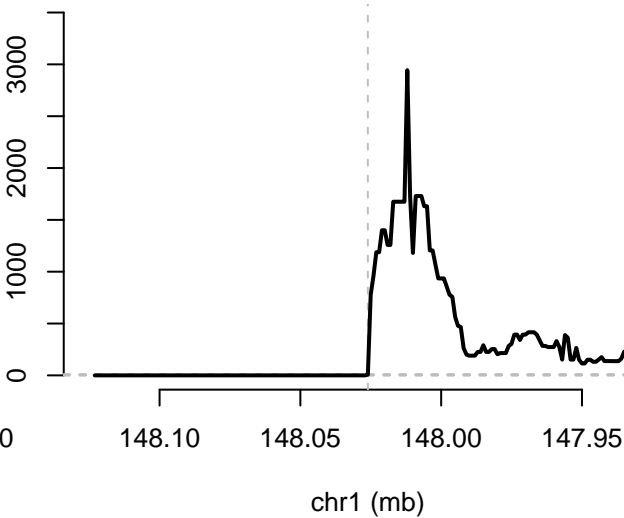

K562 chr1:148,026,033::chr1:145,302,757++

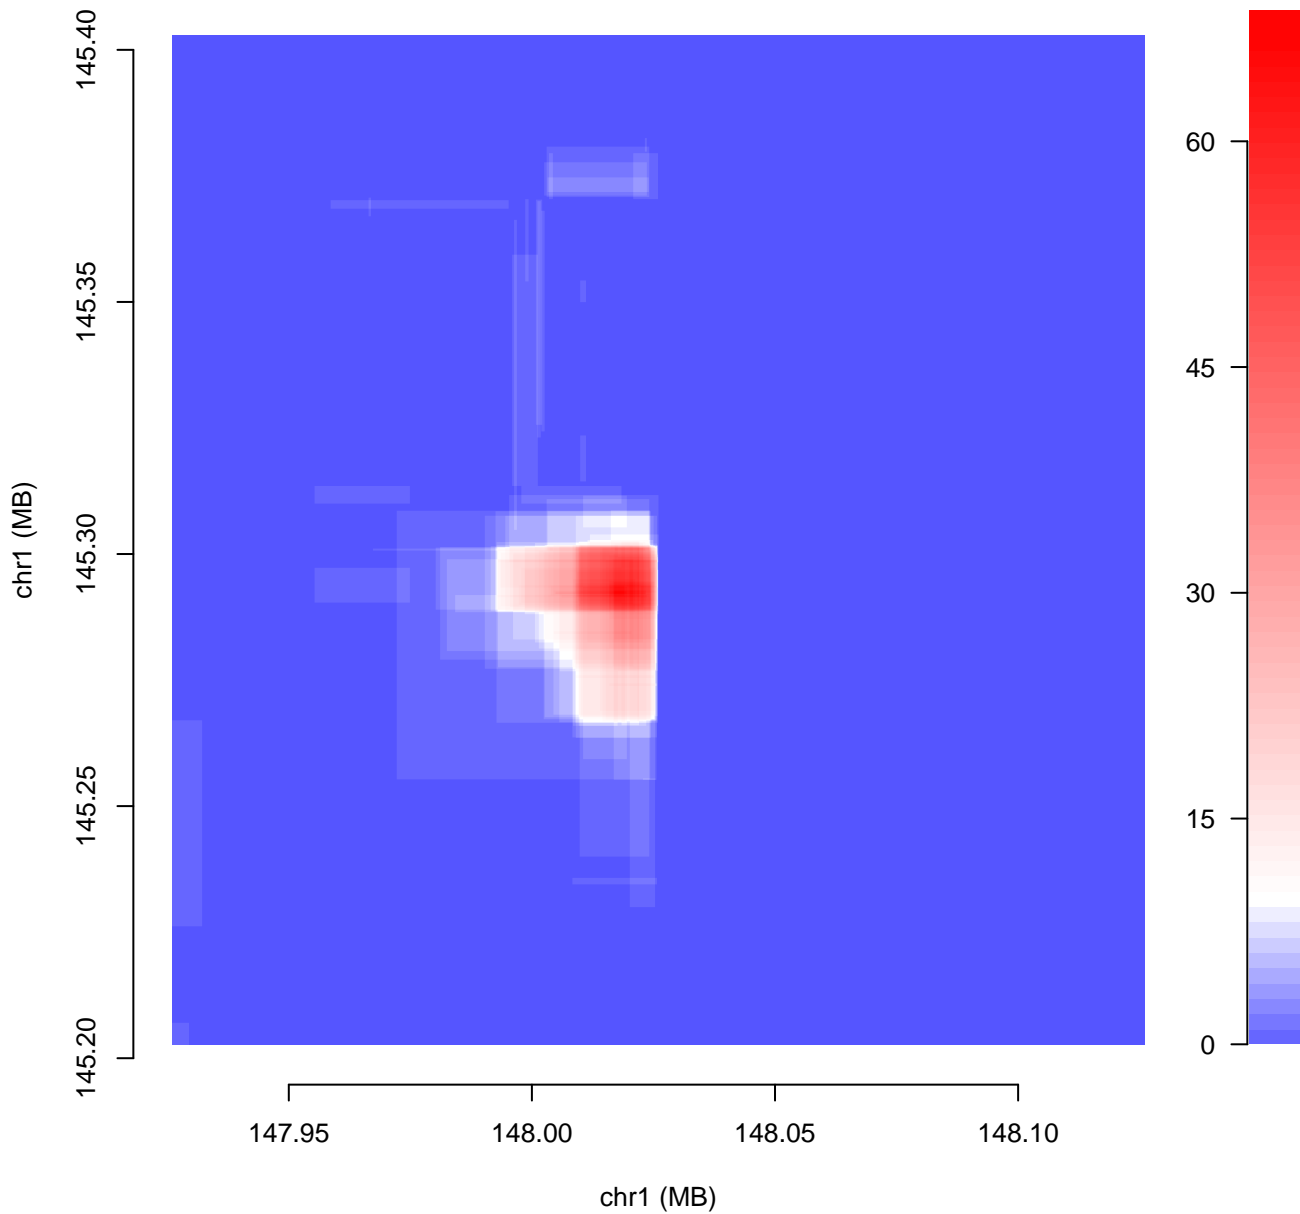

Supplement: Supplemental_Data.zip [file event_57.pdf › event_57.pdf]

Barcode

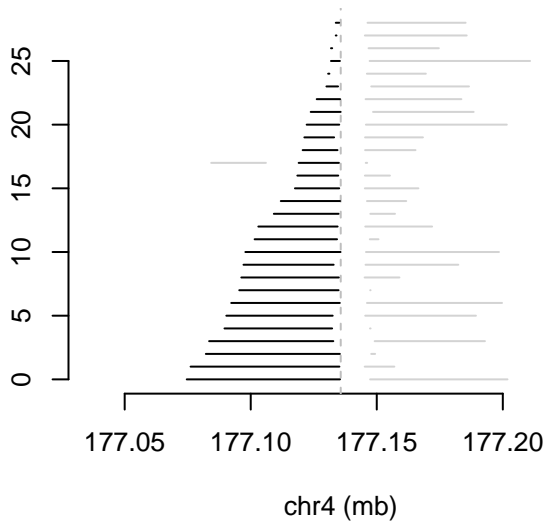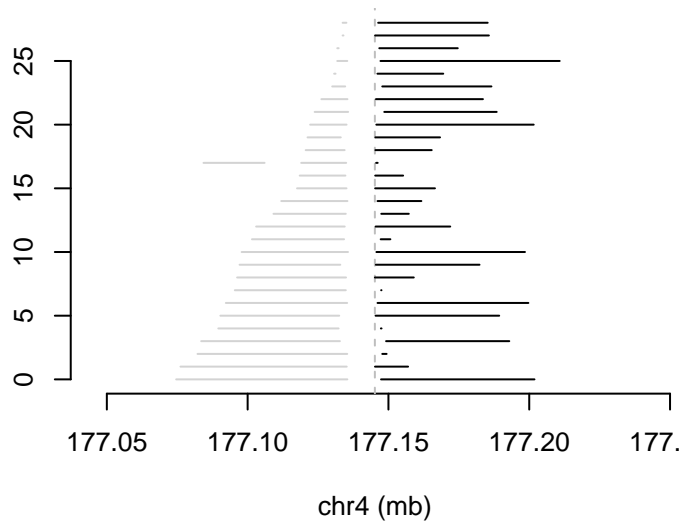

Copy number

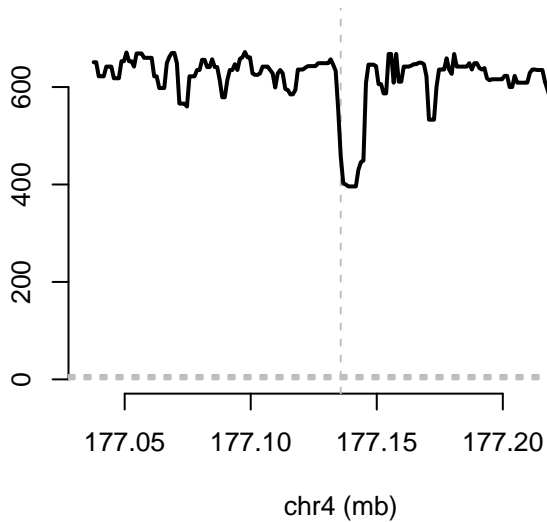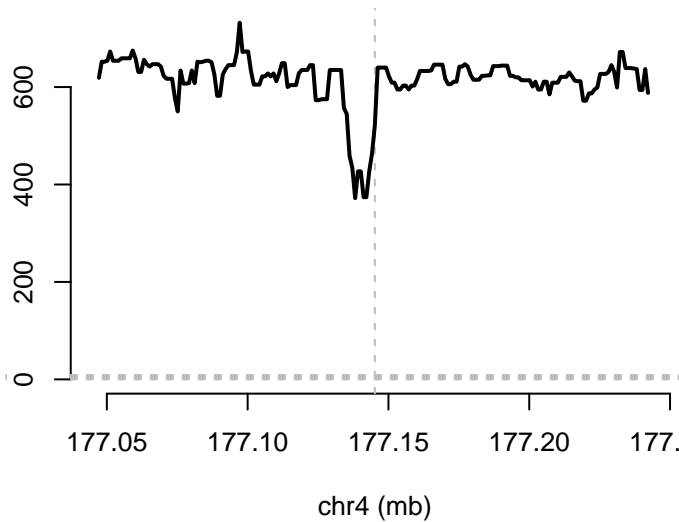

K562 chr4:177,145,181::chr4:177,135,711-+

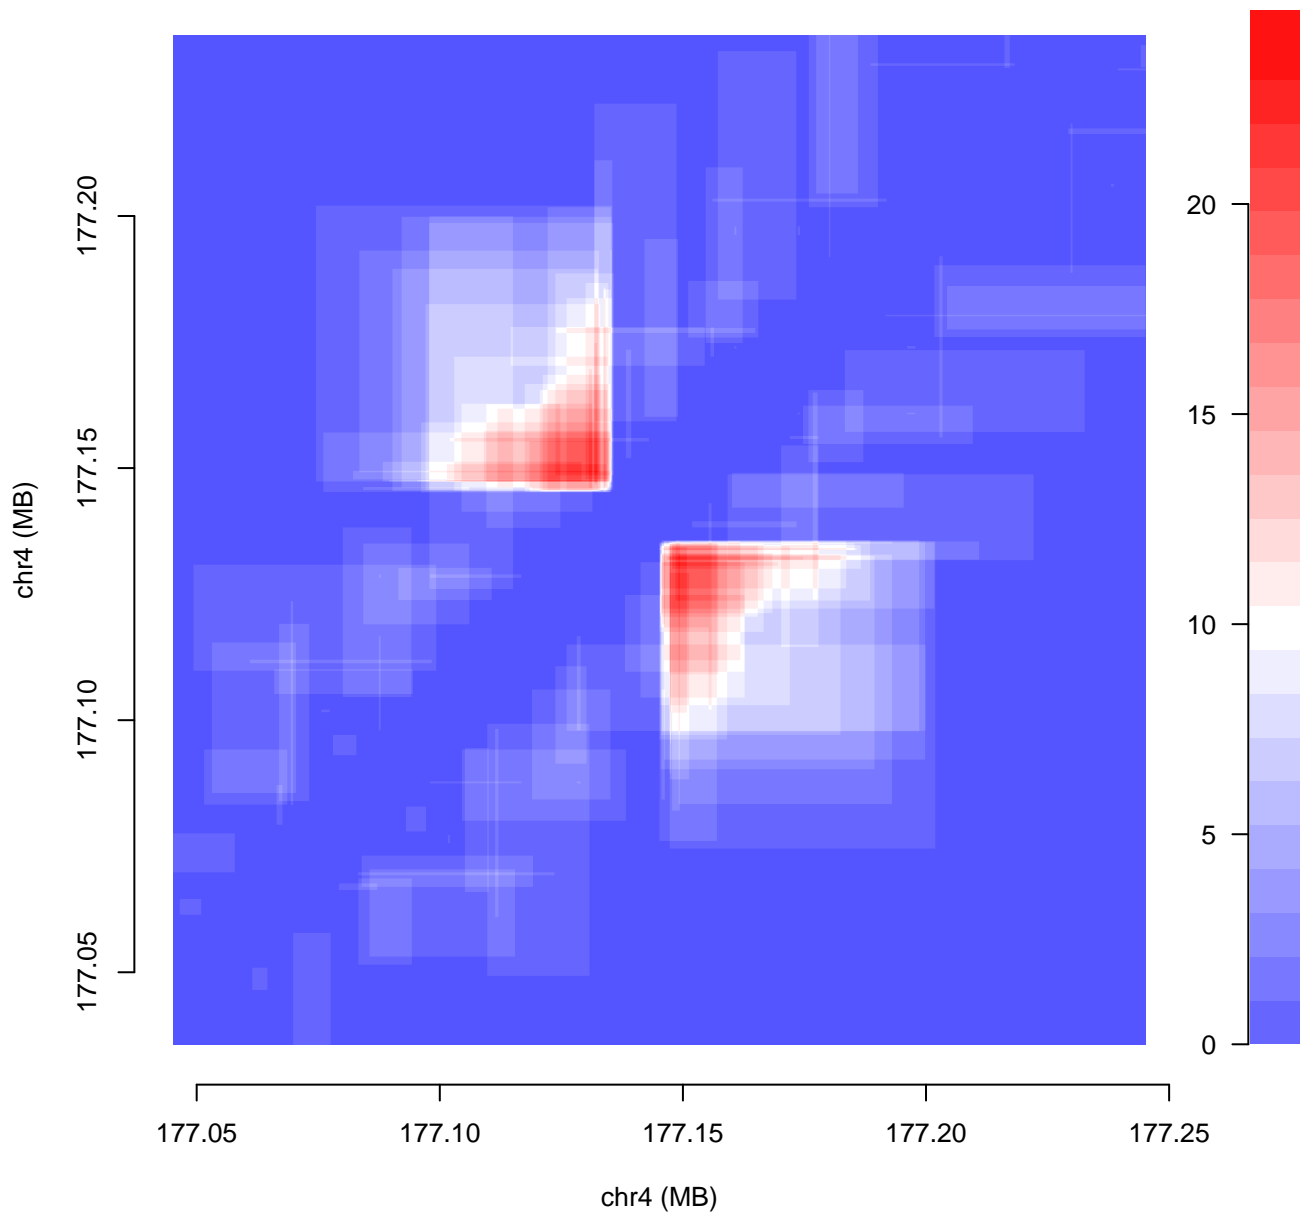

Supplement: Supplemental_Data.zip [file event_570.pdf › event_570.pdf]

Barcode

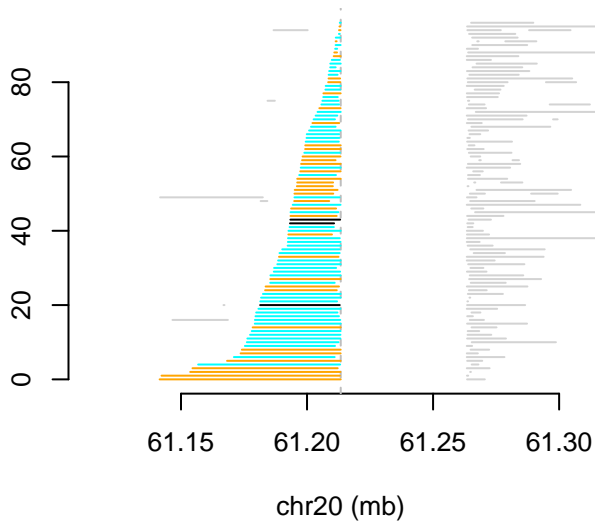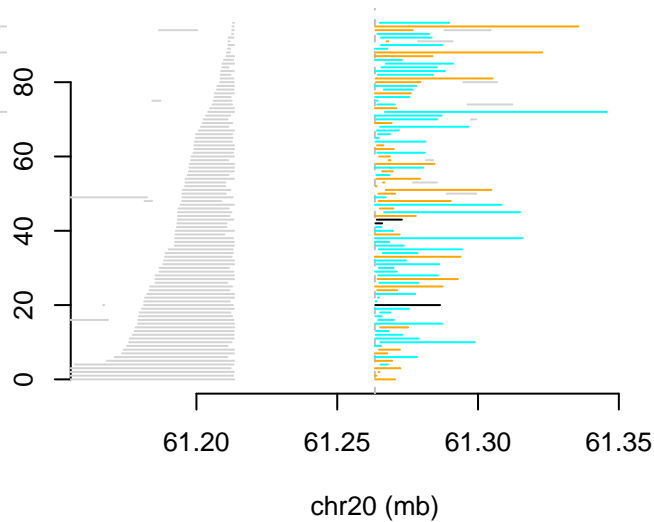

Copy number

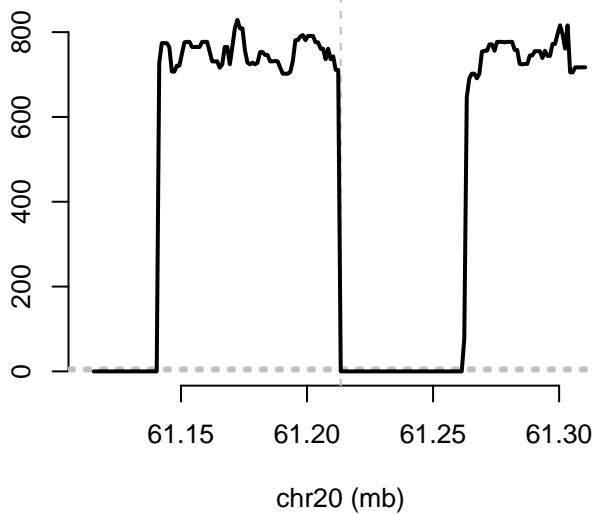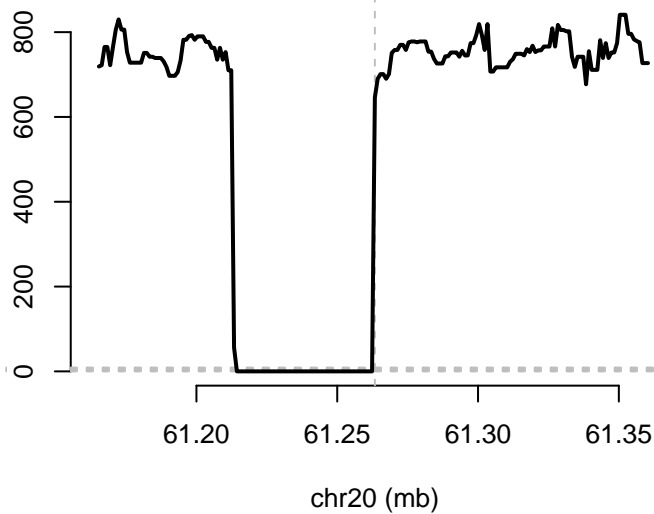

K562 chr20:61,213,371::chr20:61,263,368+-

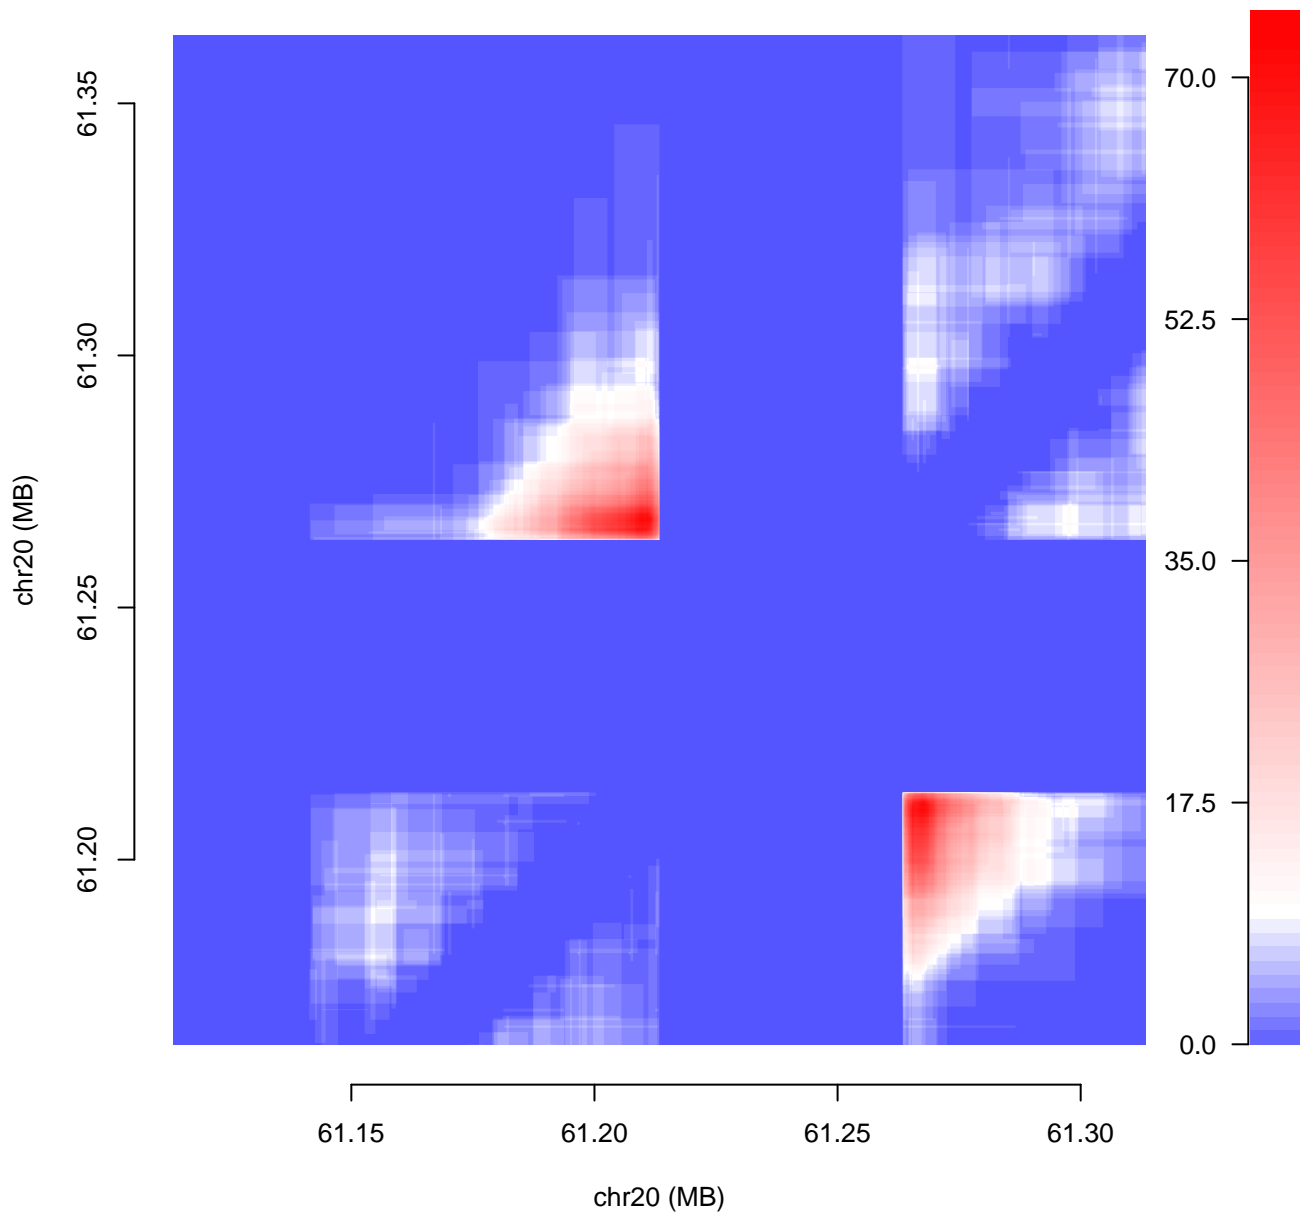

Supplement: Supplemental_Data.zip [file event_571.pdf › event_571.pdf]

Barcode

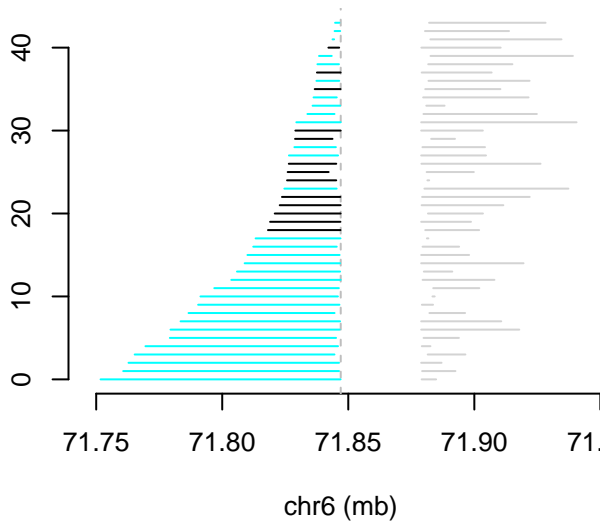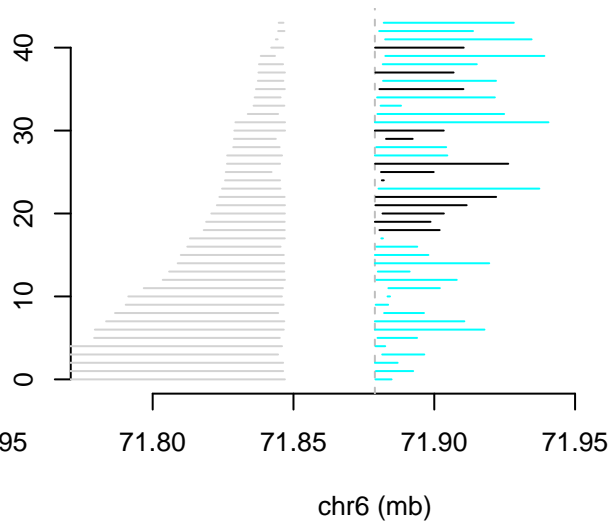

Copy number

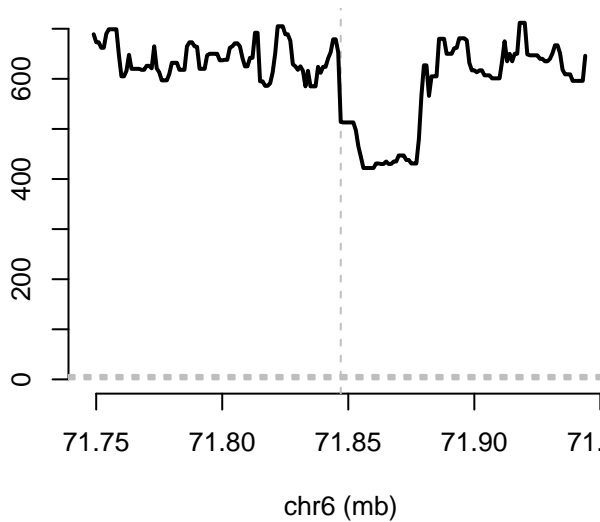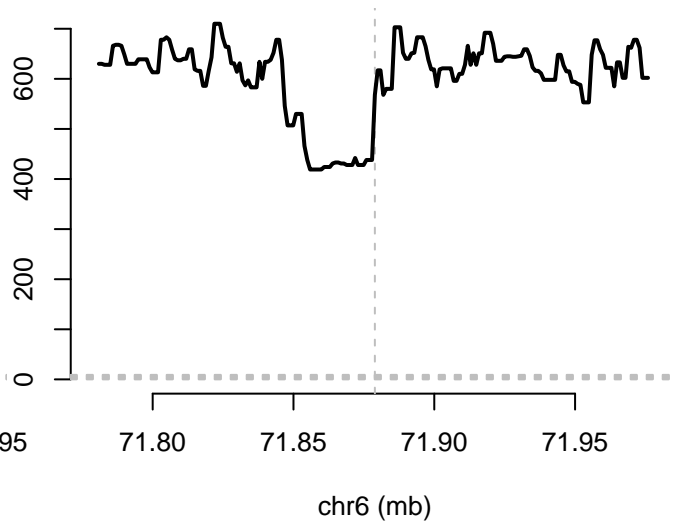

K562 chr6:71,878,908::chr6:71,847,011-+

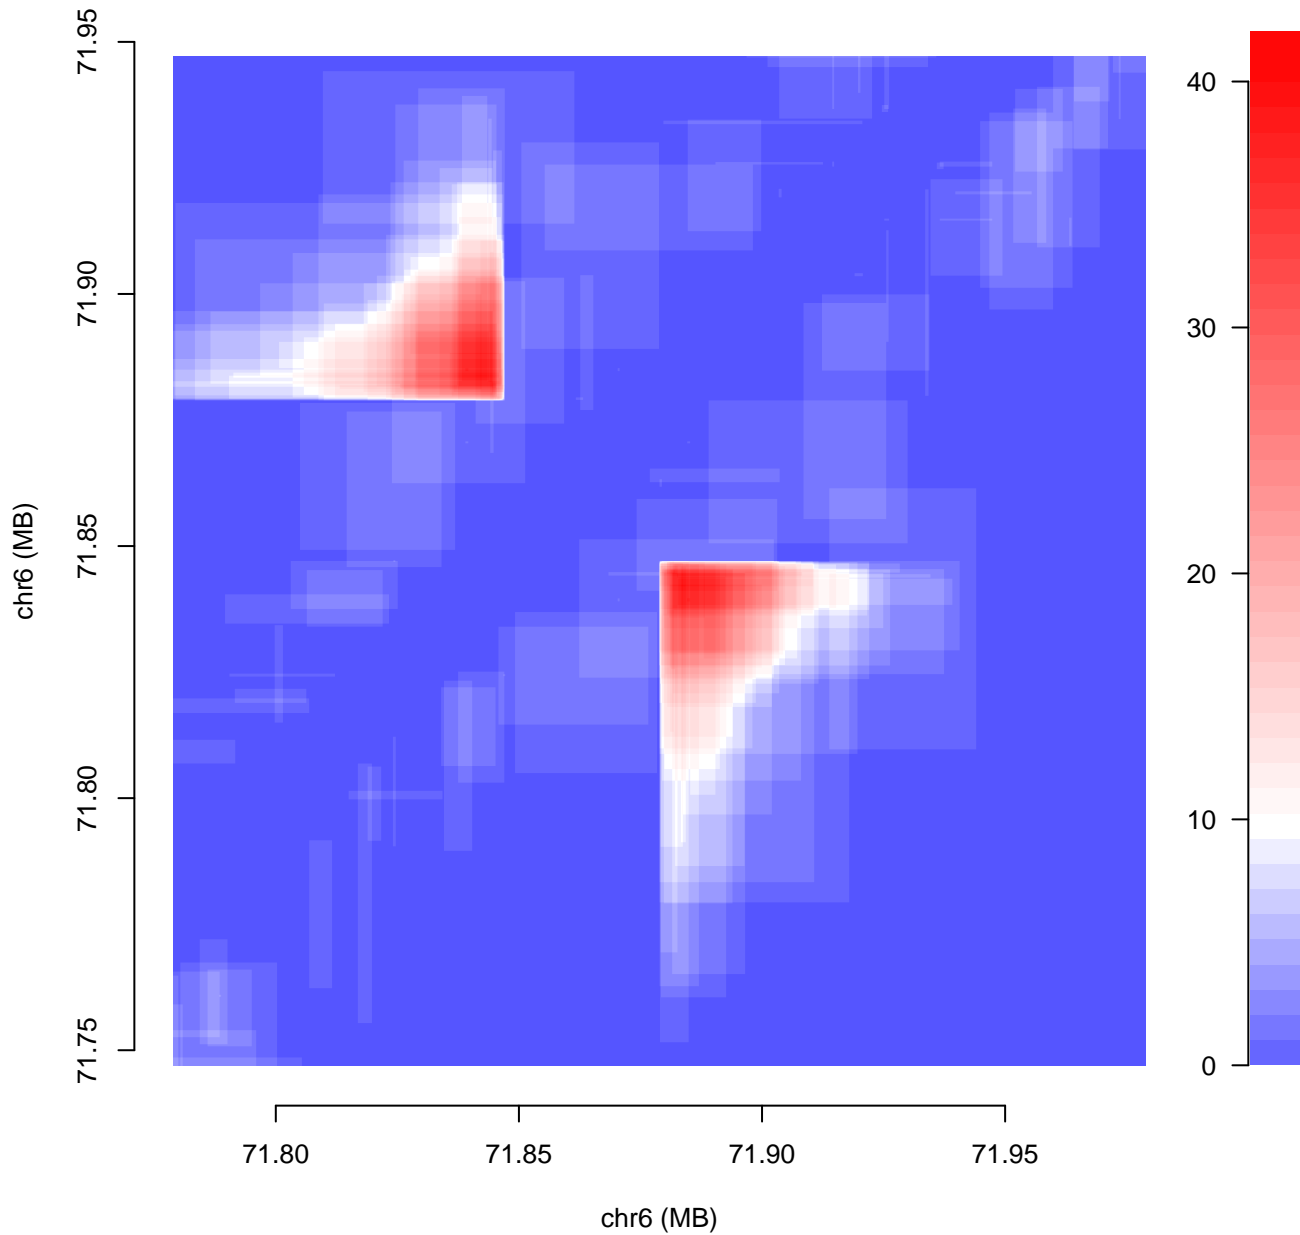

Supplement: Supplemental_Data.zip [file event_572.pdf › event_572.pdf]

Barcode

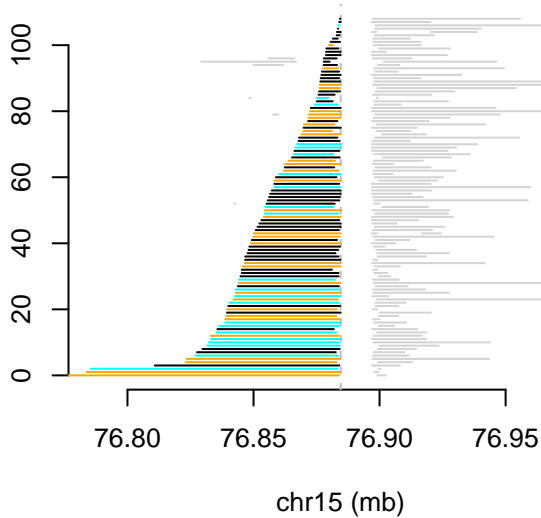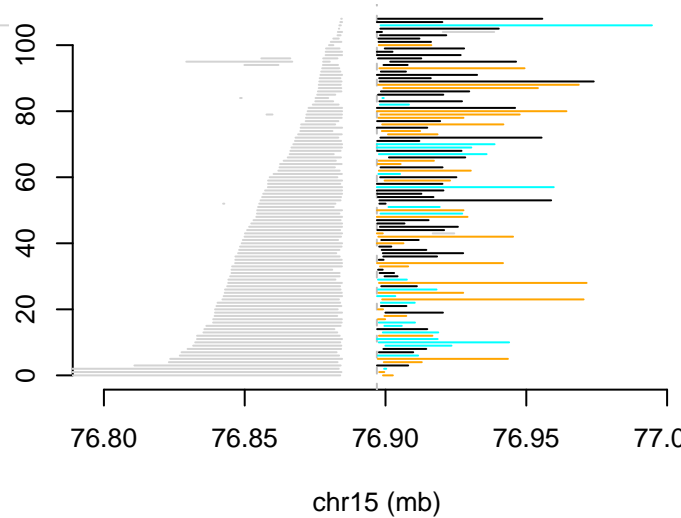

Copy number

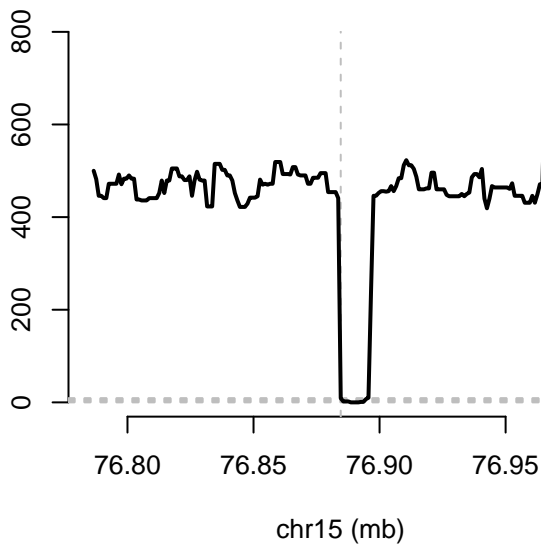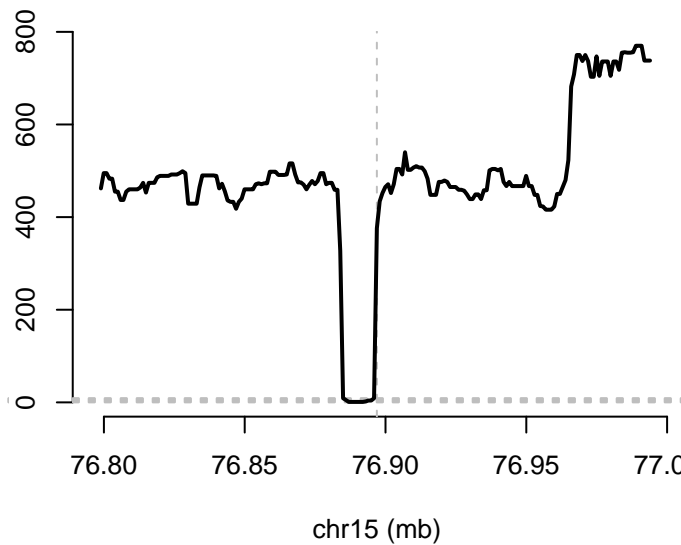

K562 chr15:76,884,597::chr15:76,896,938+-

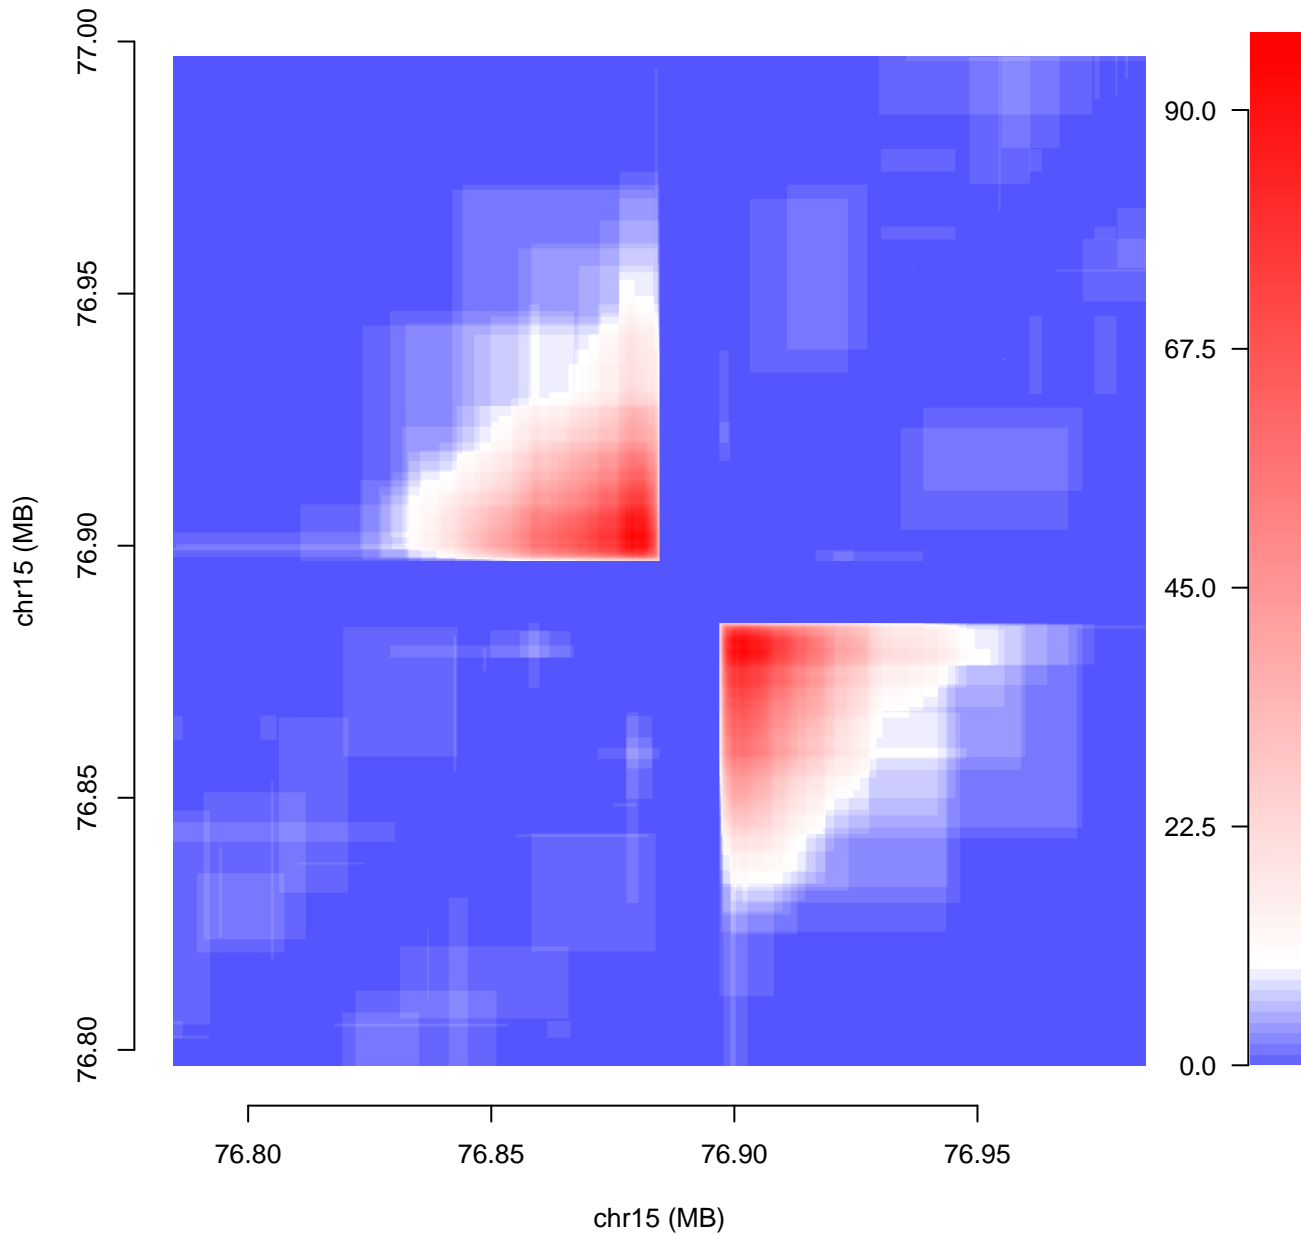

Supplement: Supplemental_Data.zip [file event_573.pdf › event_573.pdf]

Barcode

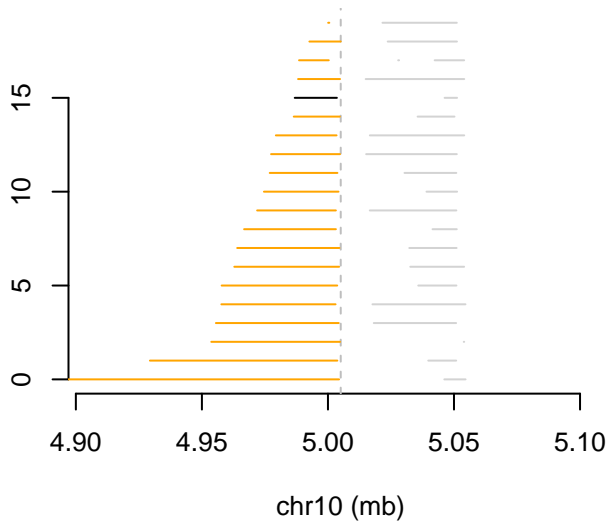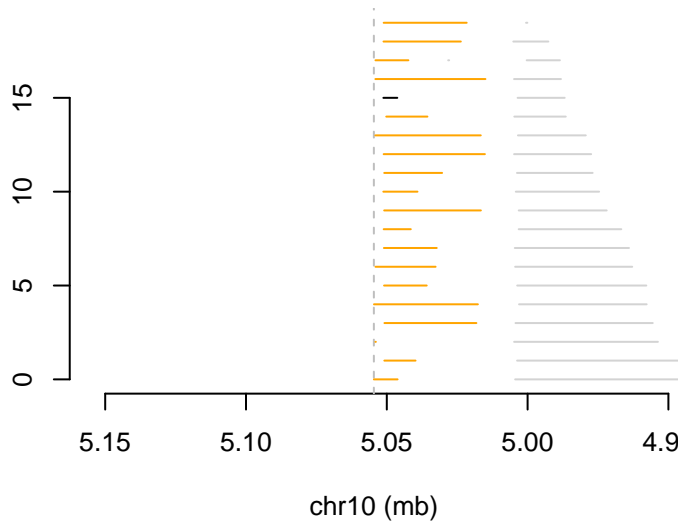

Copy number

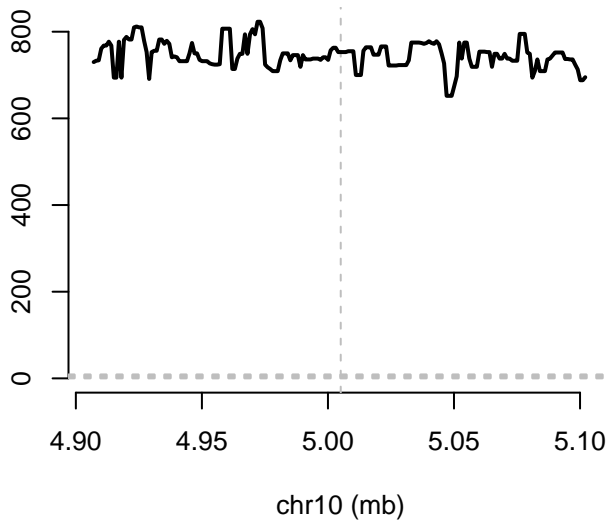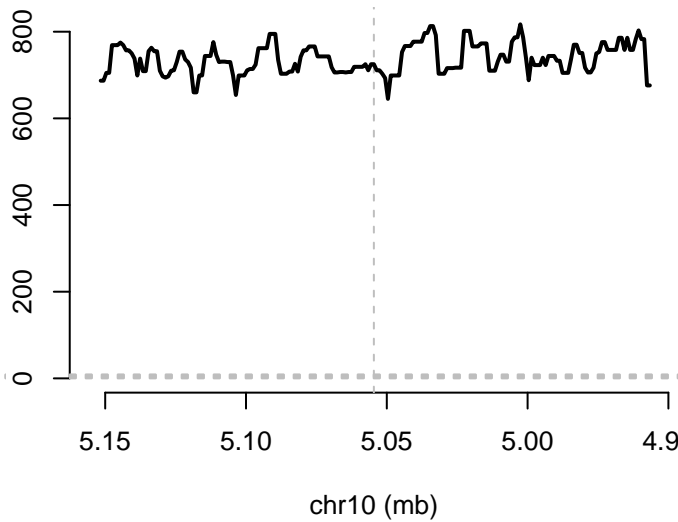

K562 chr10:5,005,076::chr10:5,054,588++

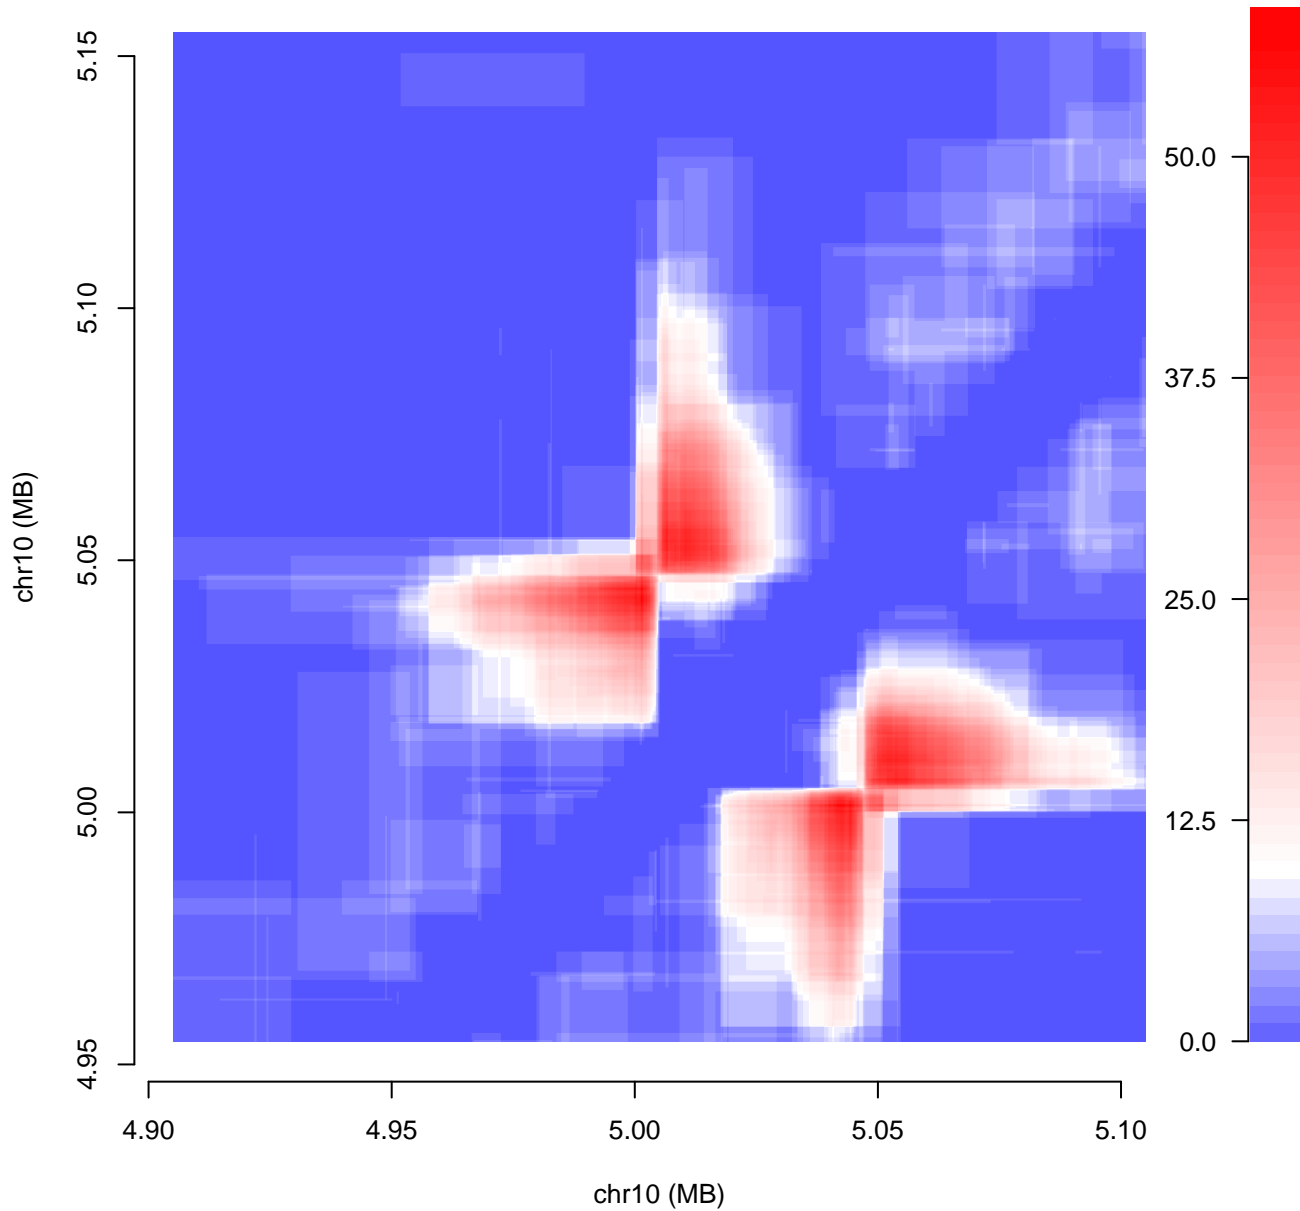

Supplement: Supplemental_Data.zip [file event_574.pdf › event_574.pdf]

Barcode

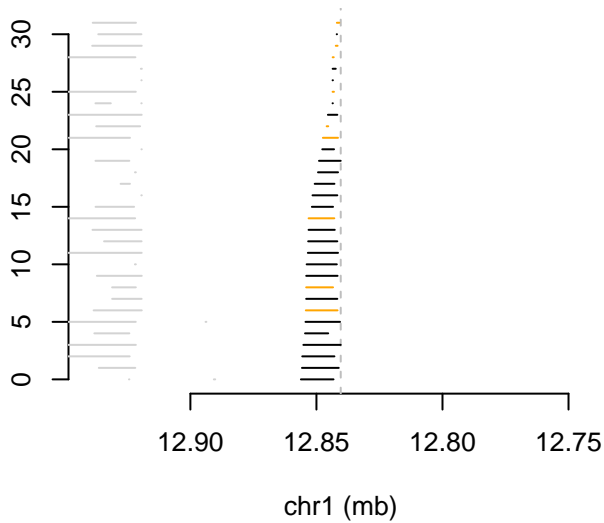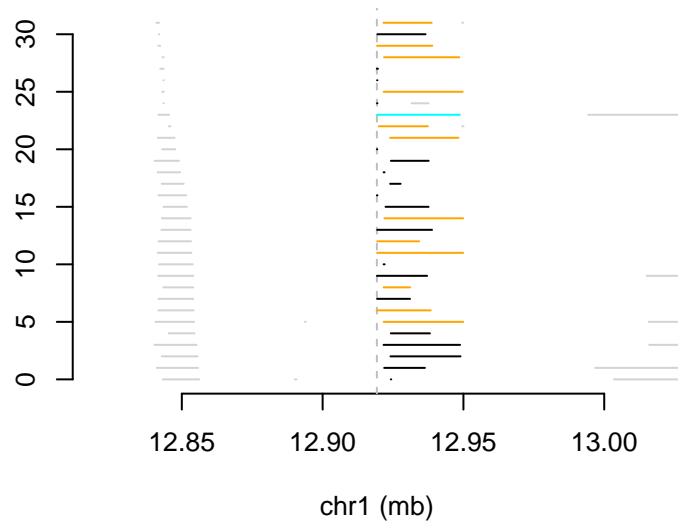

Copy number

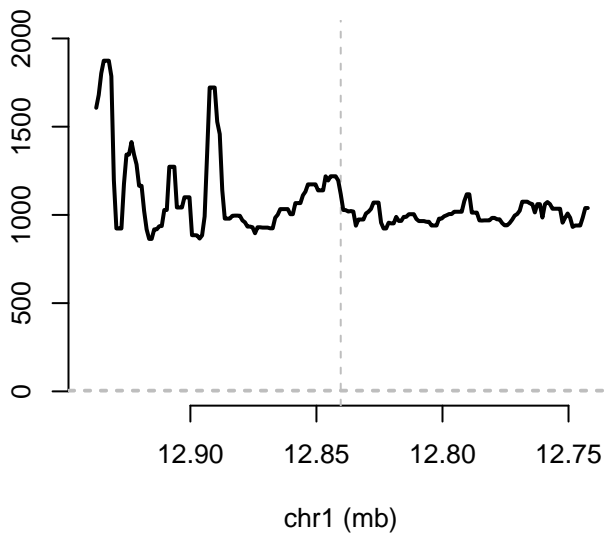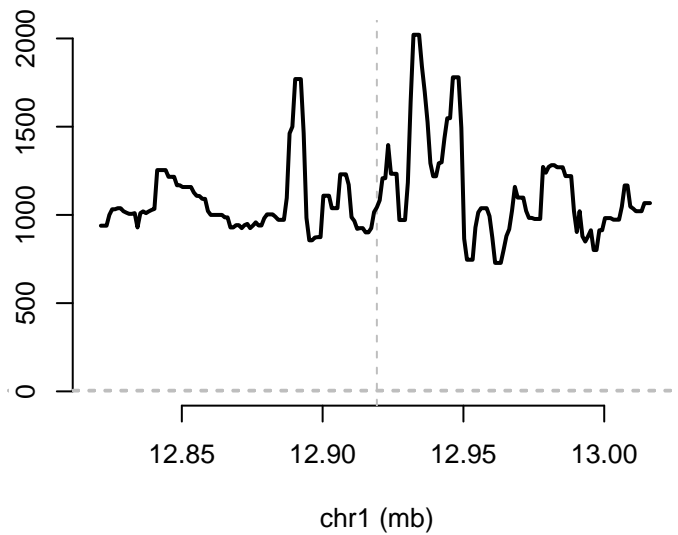

K562 chr1:12,840,358::chr1:12,919,259--

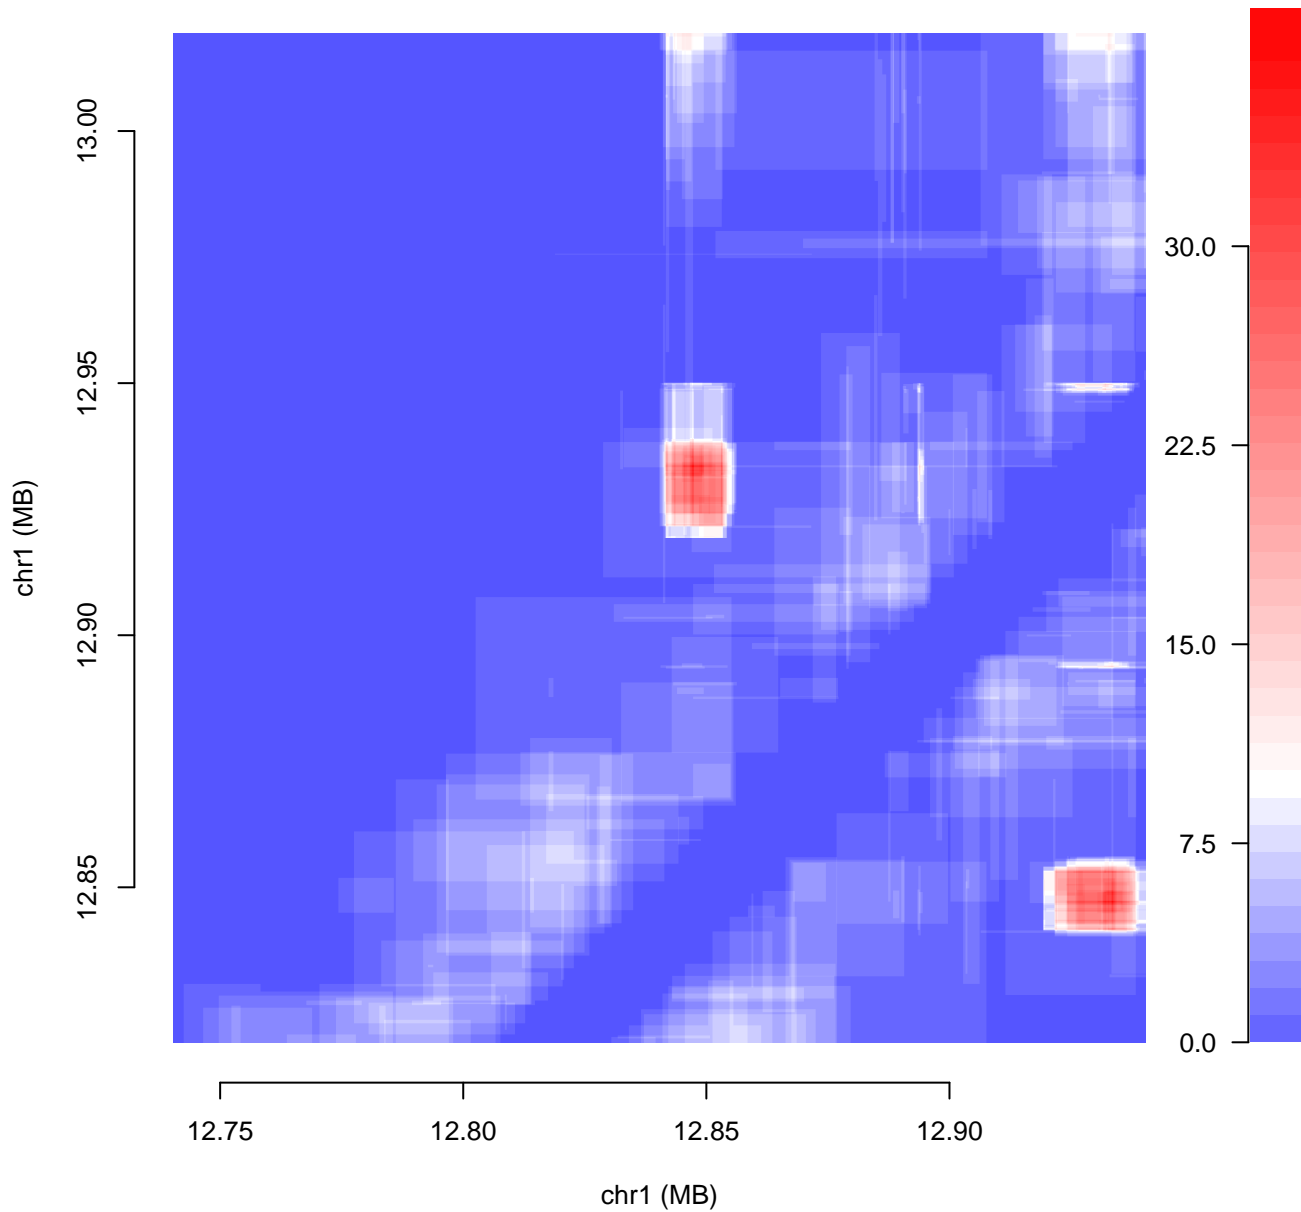

Supplement: Supplemental_Data.zip [file event_575.pdf › event_575.pdf]

Barcode

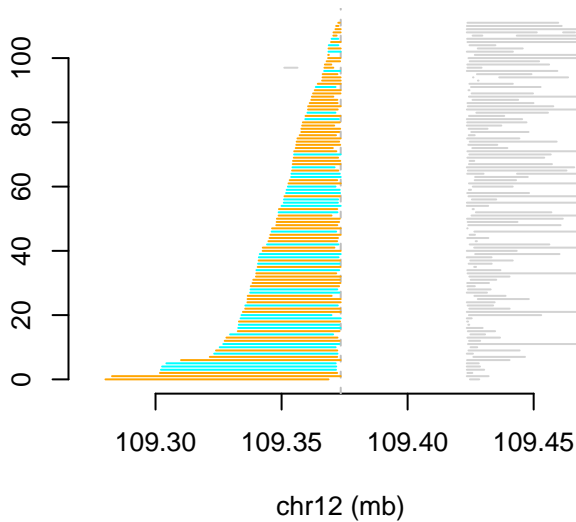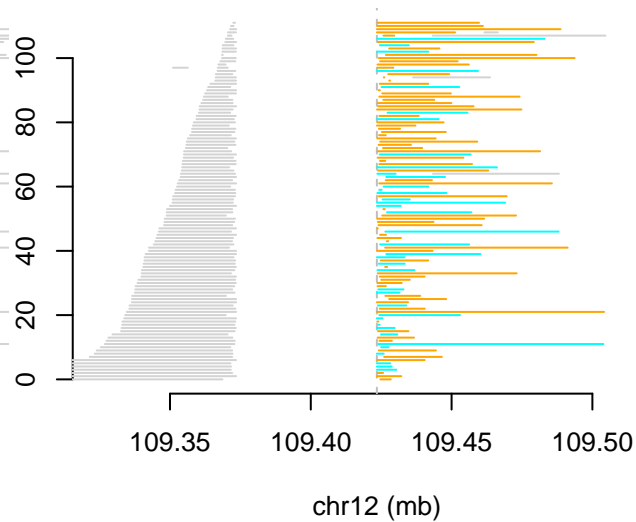

Copy number

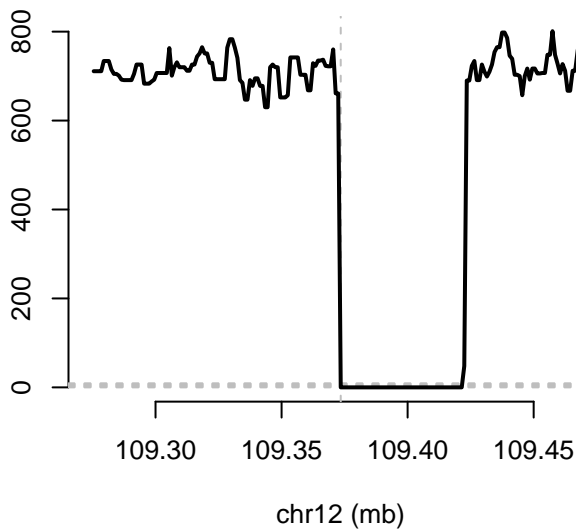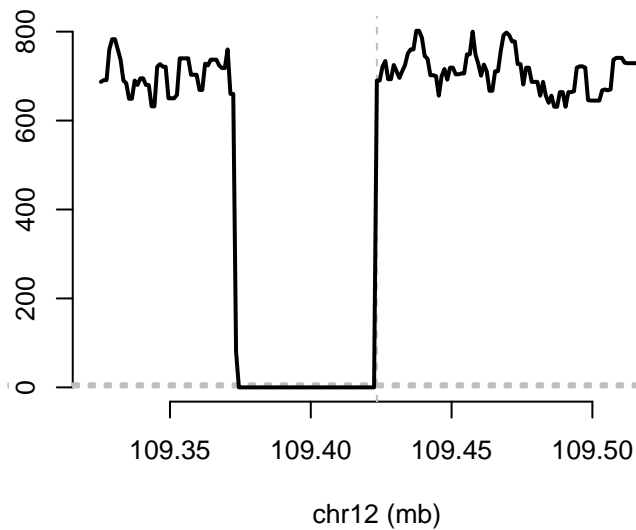

K562 chr12:109,423,469::chr12:109,373,472-+

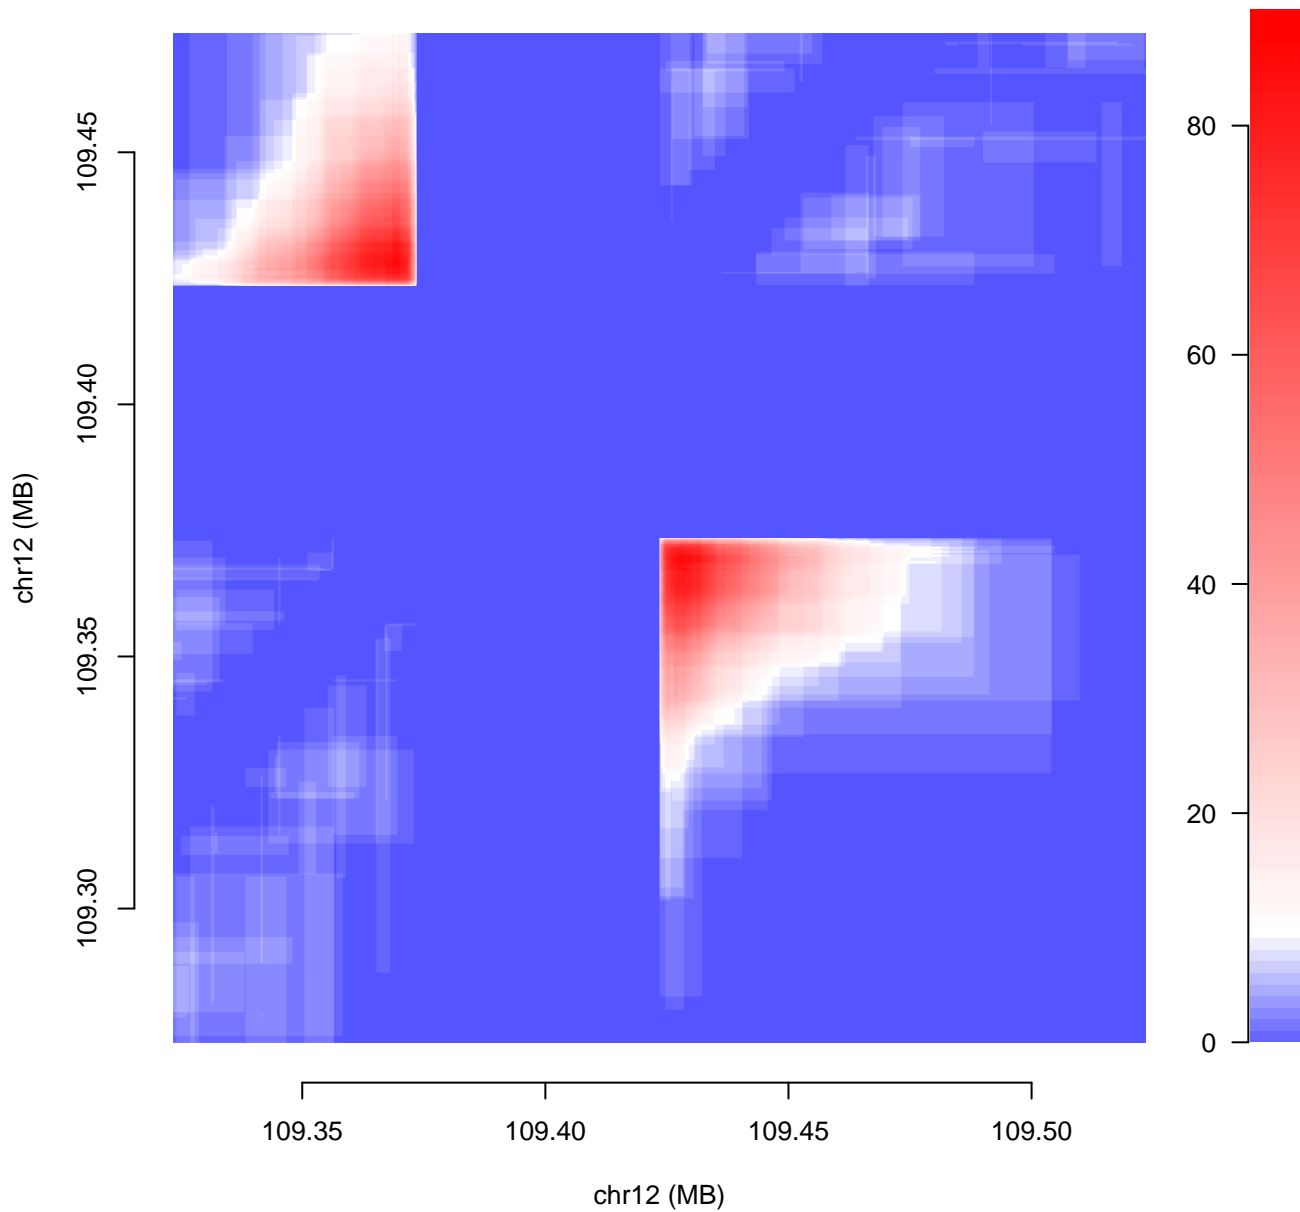

Supplement: Supplemental_Data.zip [file event_576.pdf › event_576.pdf]

Barcode

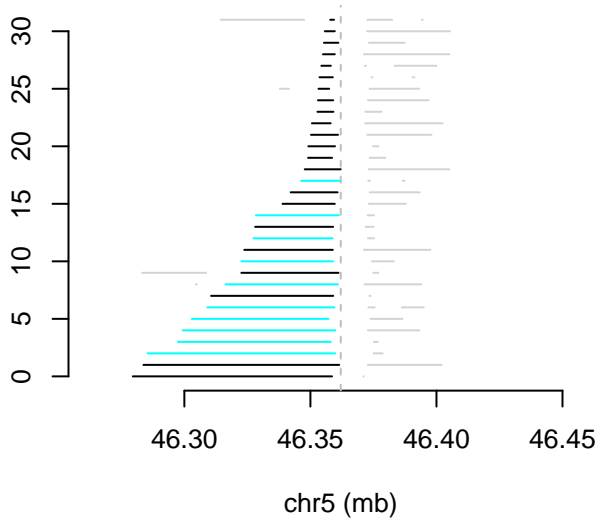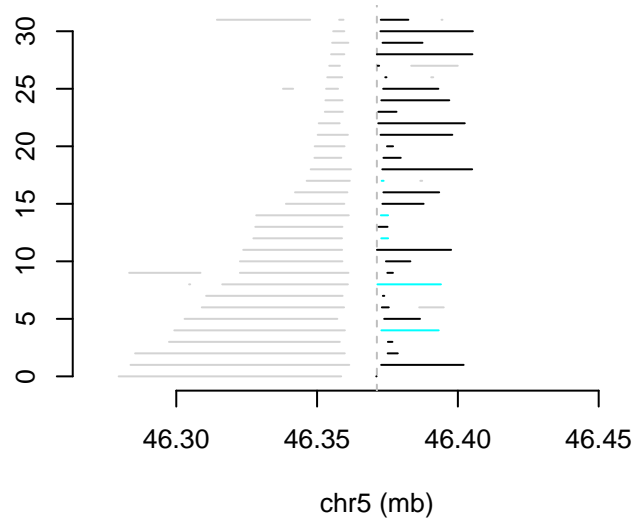

Copy number

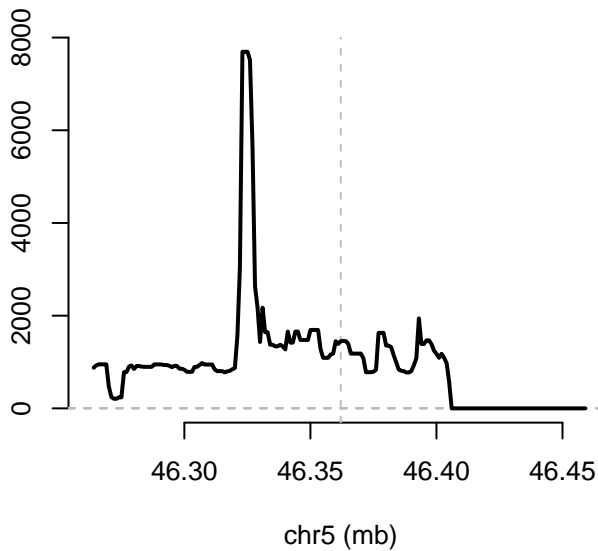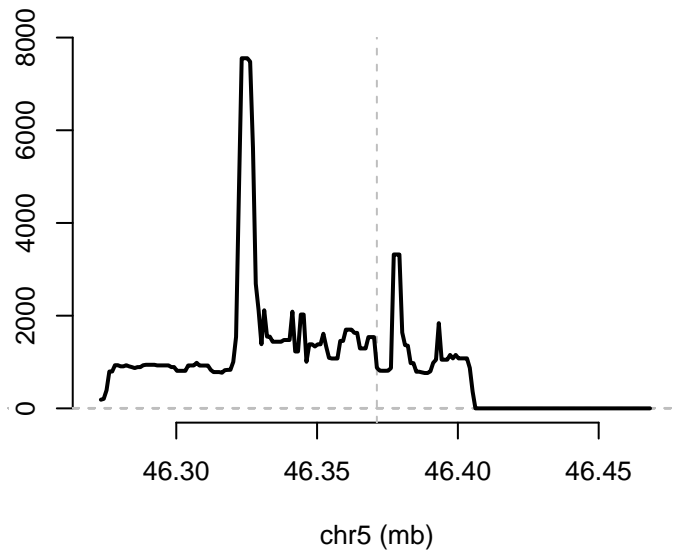

K562 chr5:46,362,032::chr5:46,371,237+-

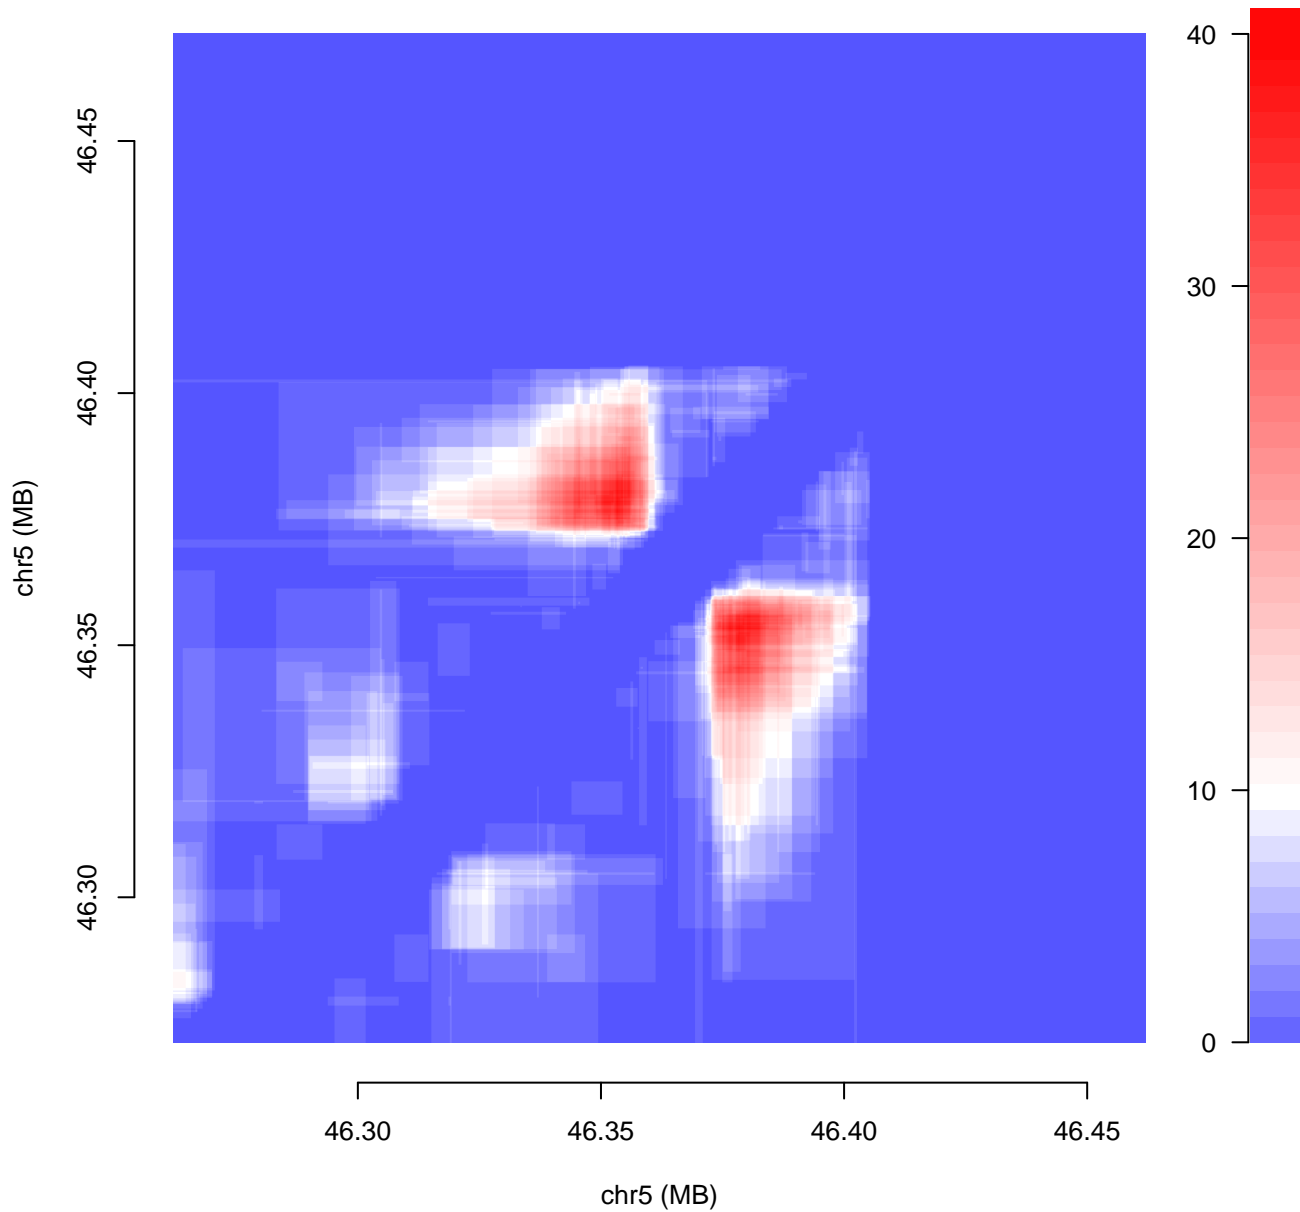

Supplement: Supplemental_Data.zip [file event_577.pdf › event_577.pdf]

Barcode

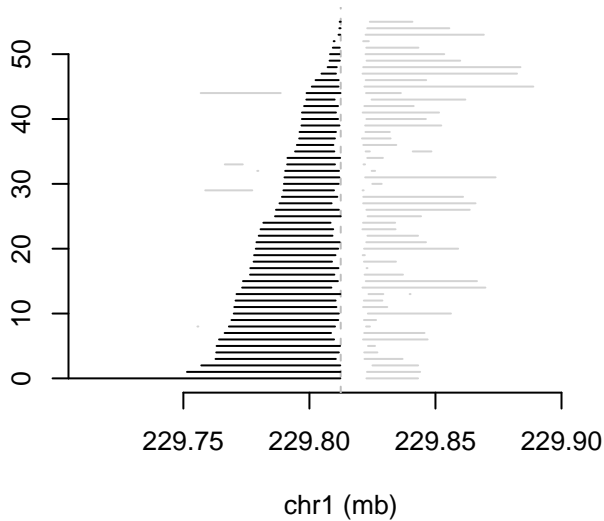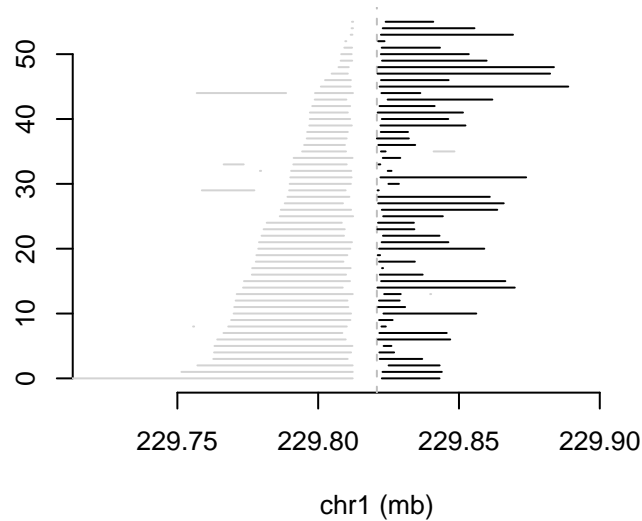

Copy number

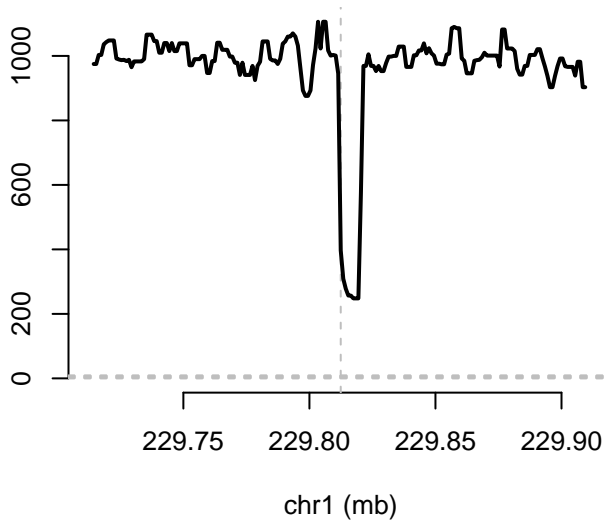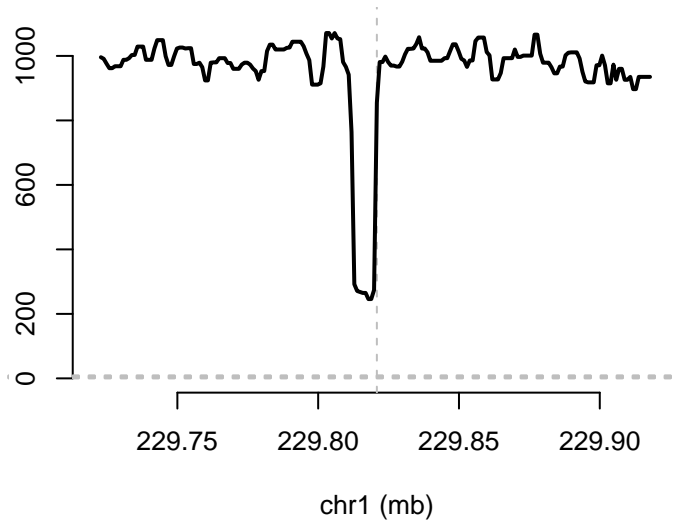

K562 chr1:229,812,427::chr1:229,820,843+-

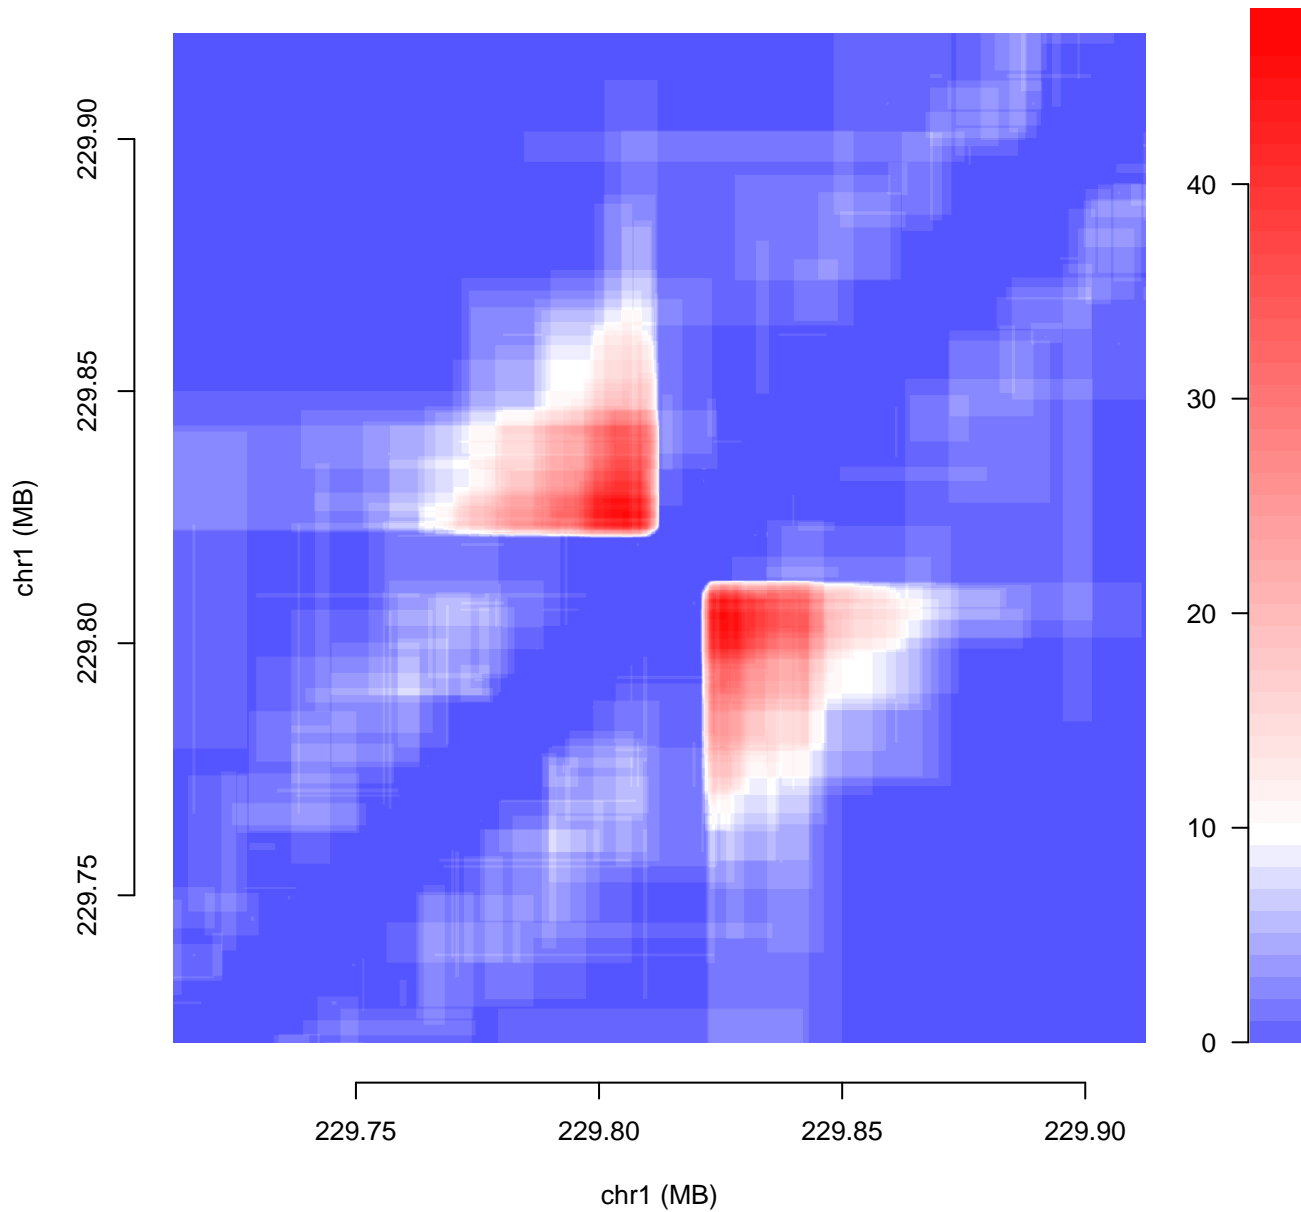

Supplement: Supplemental_Data.zip [file event_578.pdf › event_578.pdf]

K562 chr12:132,141,500::chr12:131,788,409-+

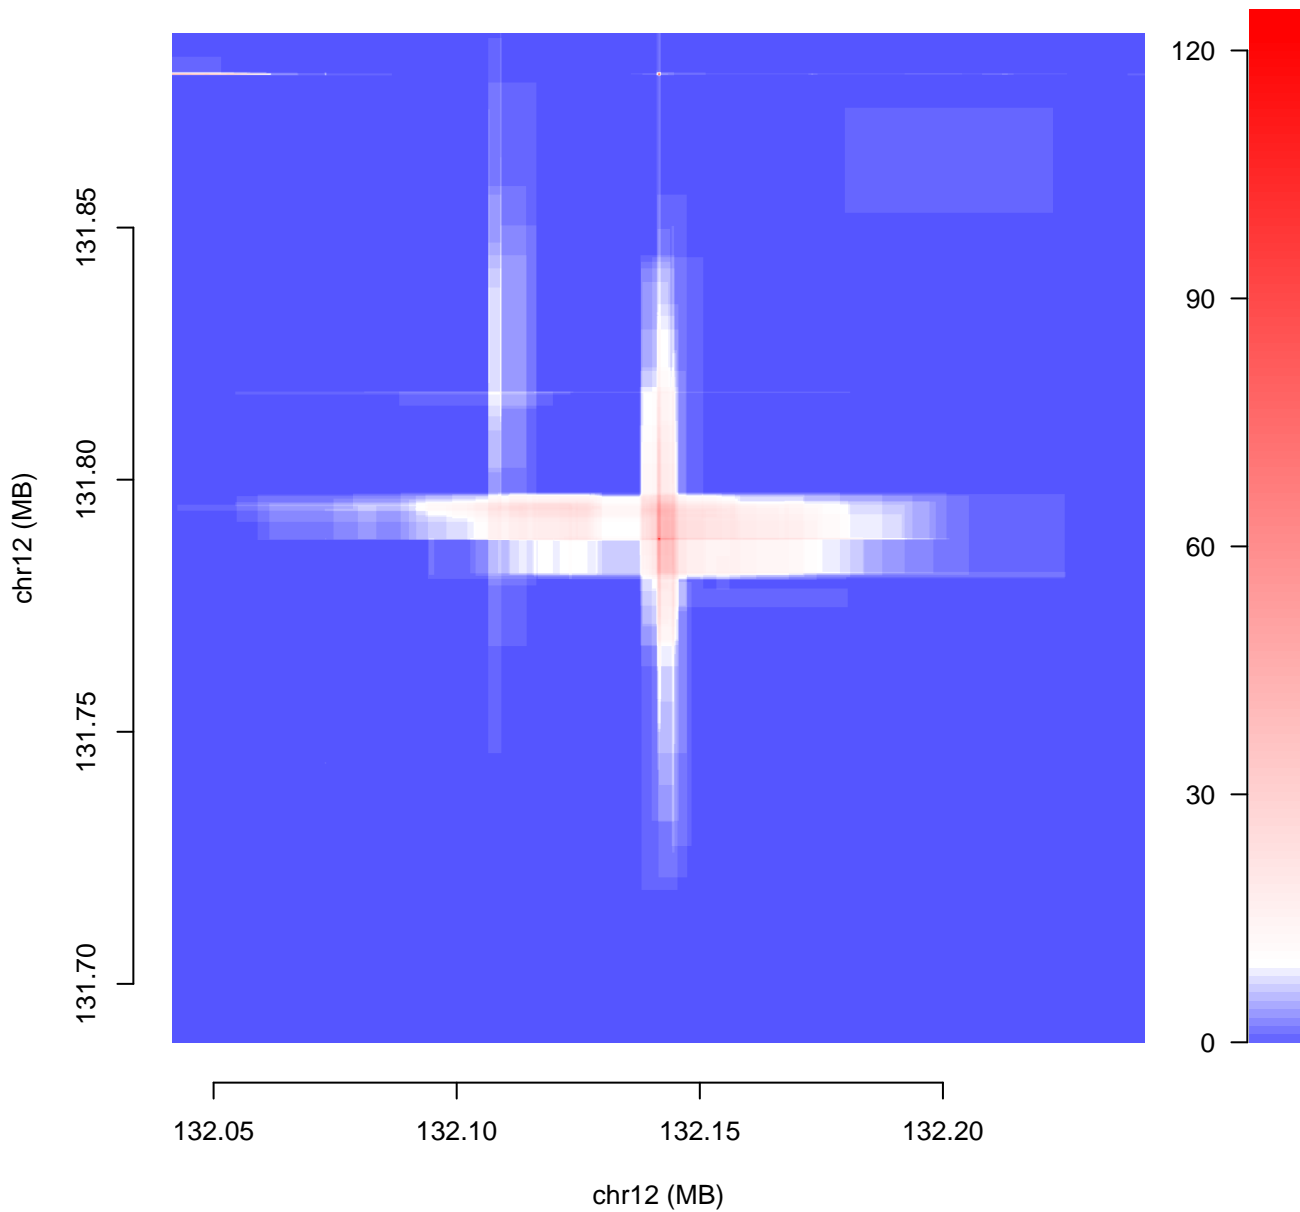

Supplement: Supplemental_Data.zip [file event_579.pdf › event_579.pdf]

Barcode

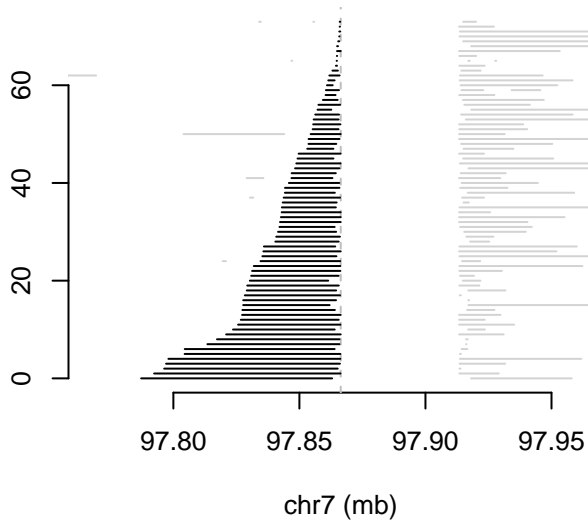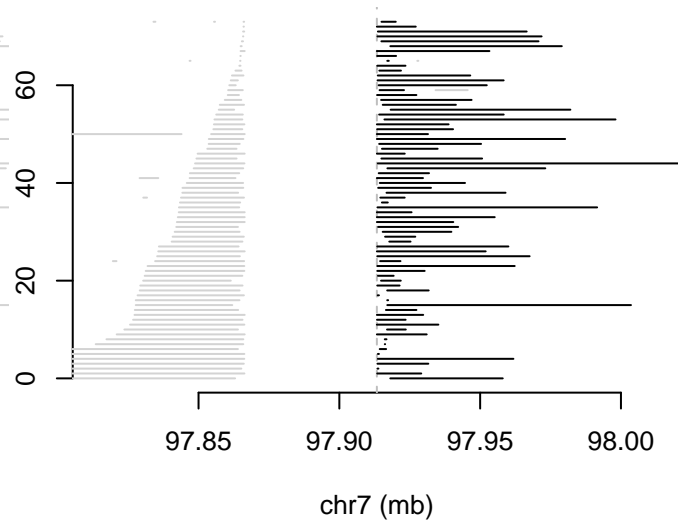

Copy number

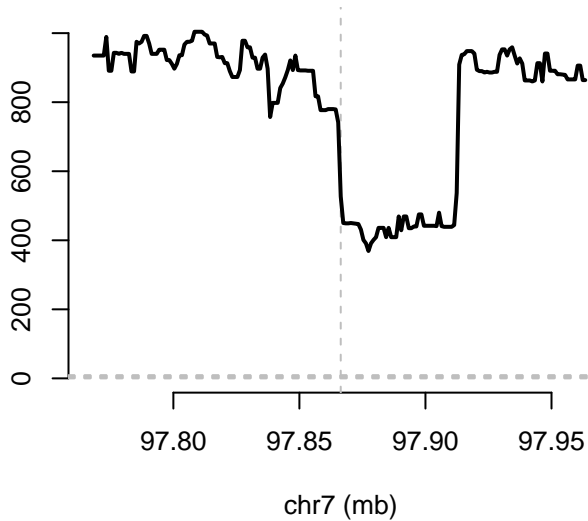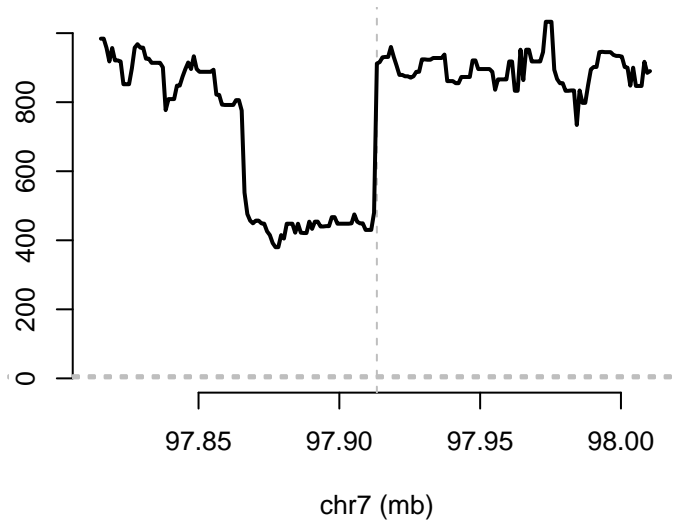

K562 chr7:97,913,327::chr7:97,866,398-+

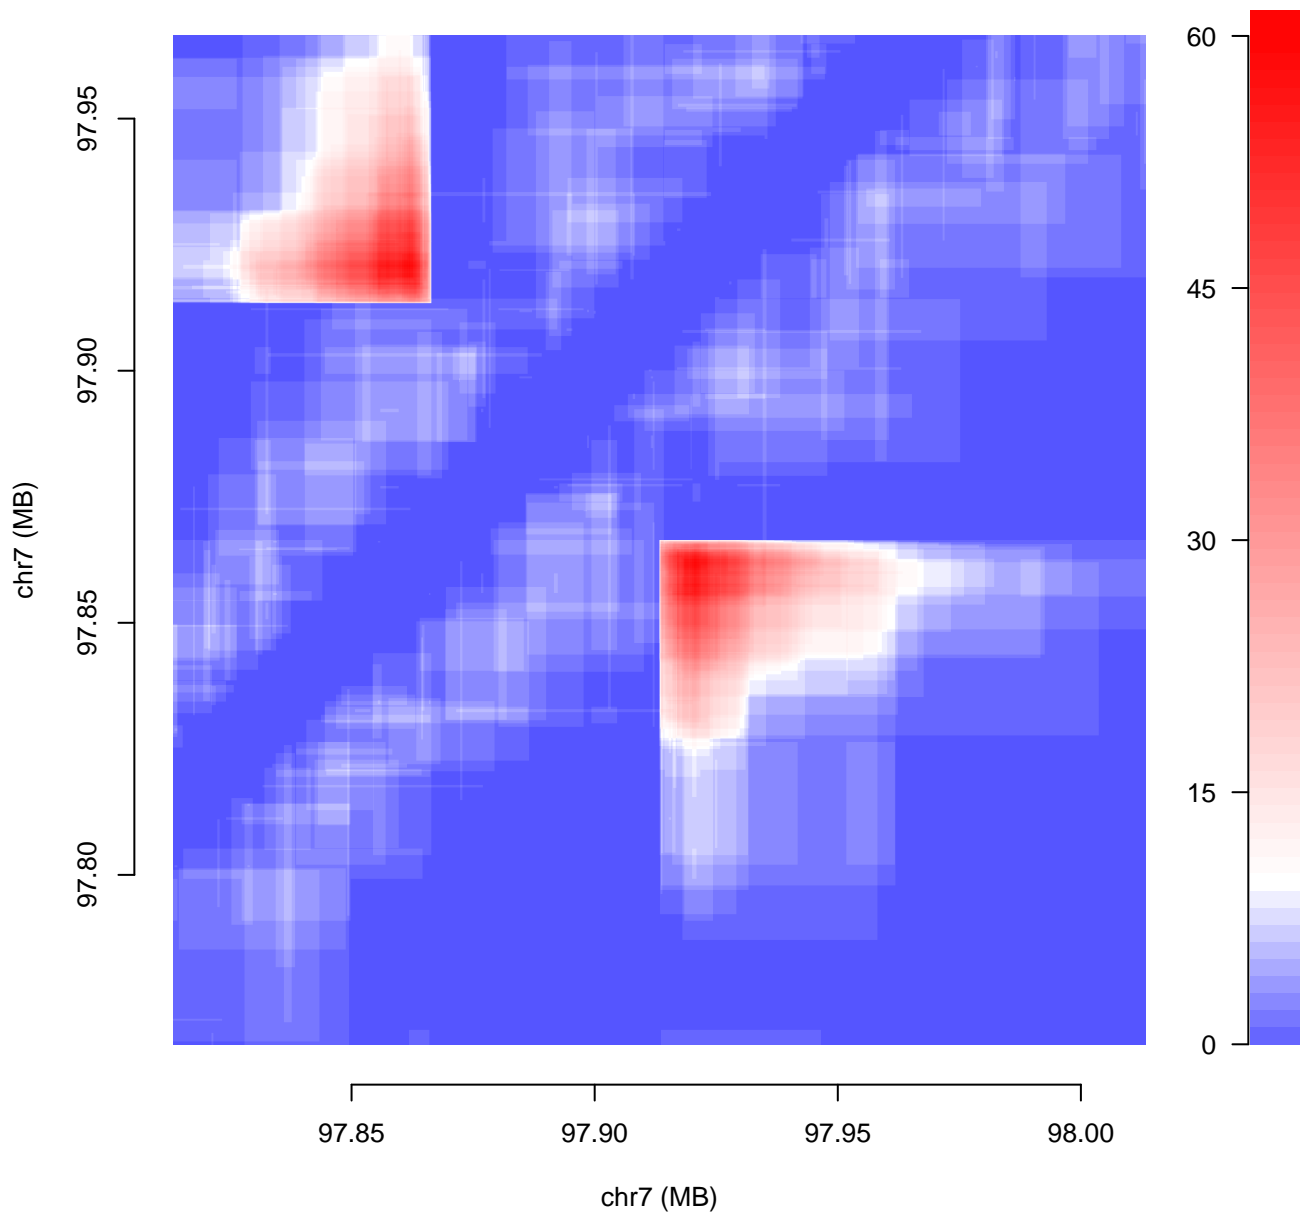

Supplement: Supplemental_Data.zip [file event_58.pdf › event_58.pdf]

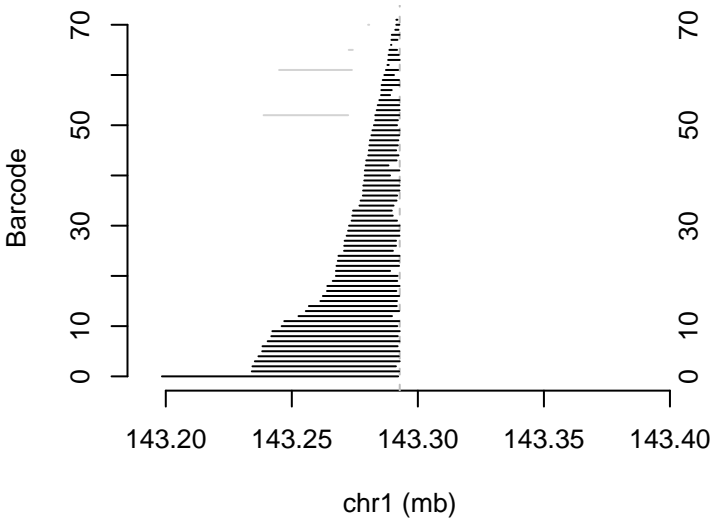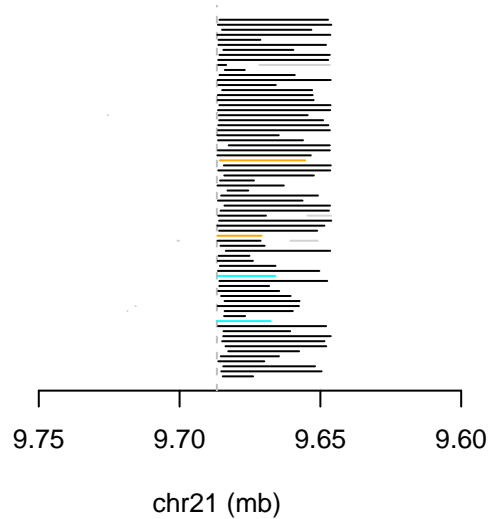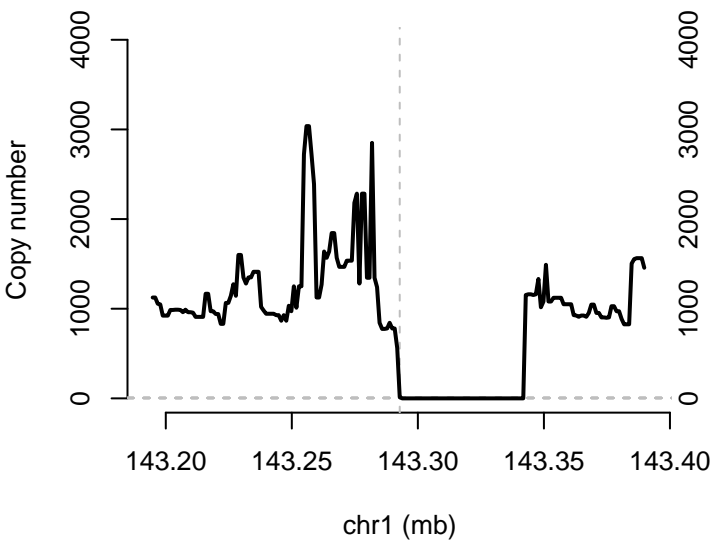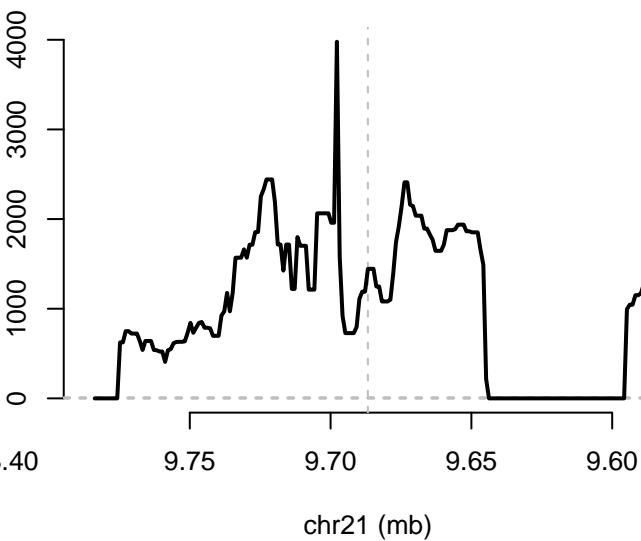

K562 chr21:9,686,756::chr1:143,292,811++

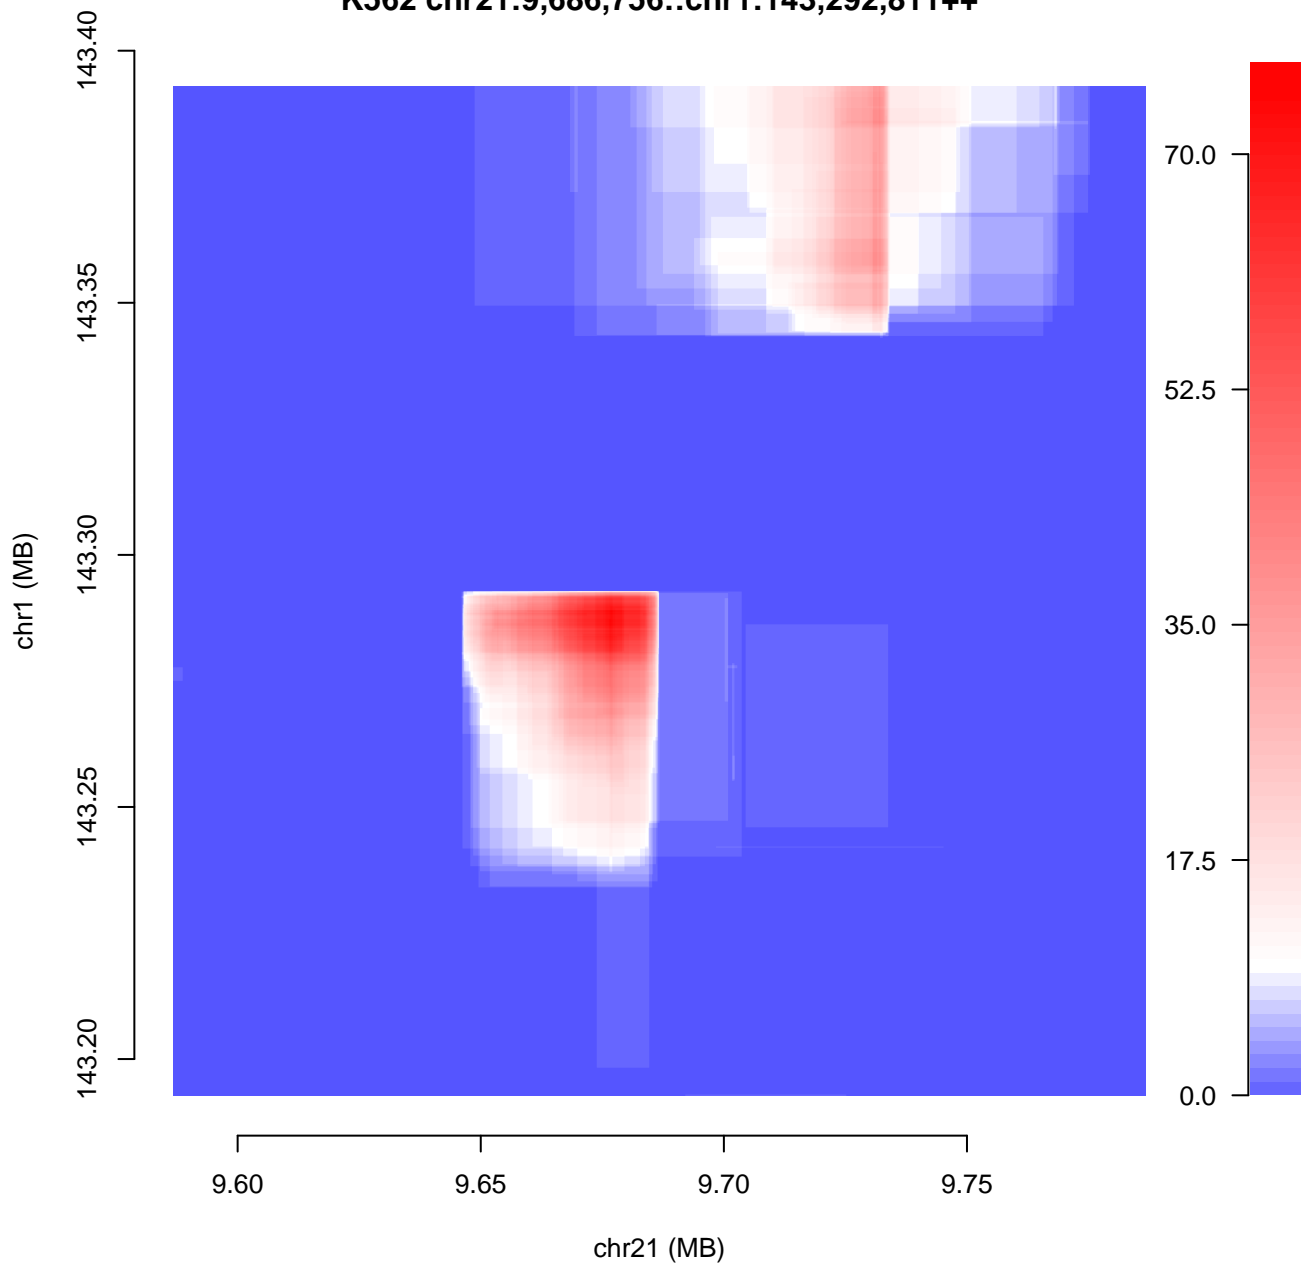

Supplement: Supplemental_Data.zip [file event_580.pdf › event_580.pdf]

Barcode

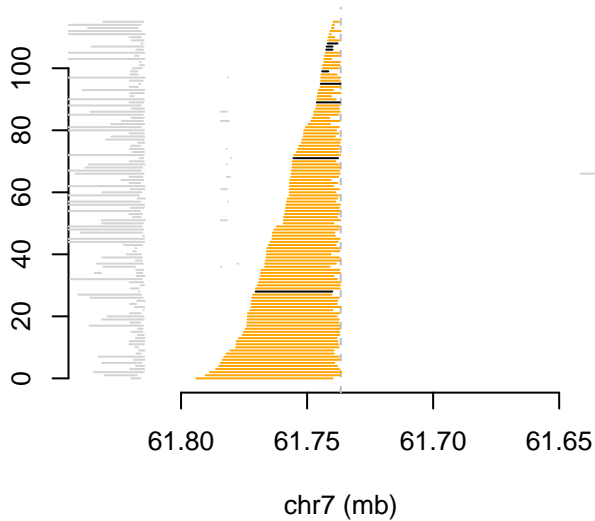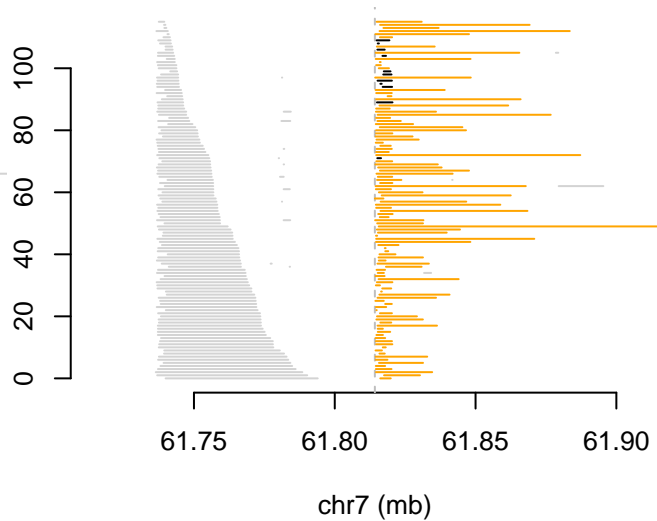

Copy number

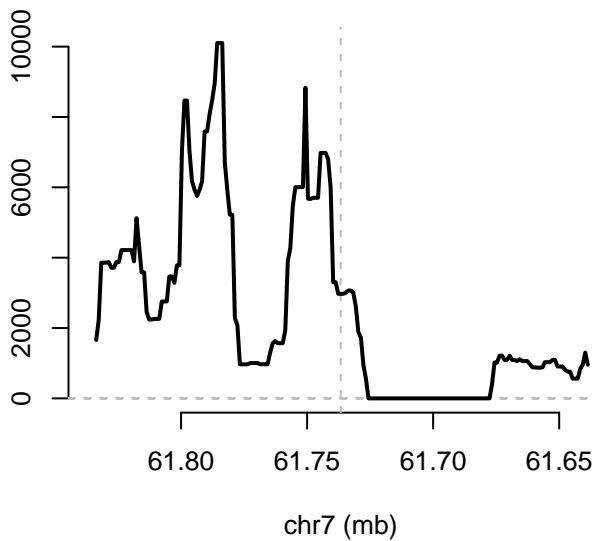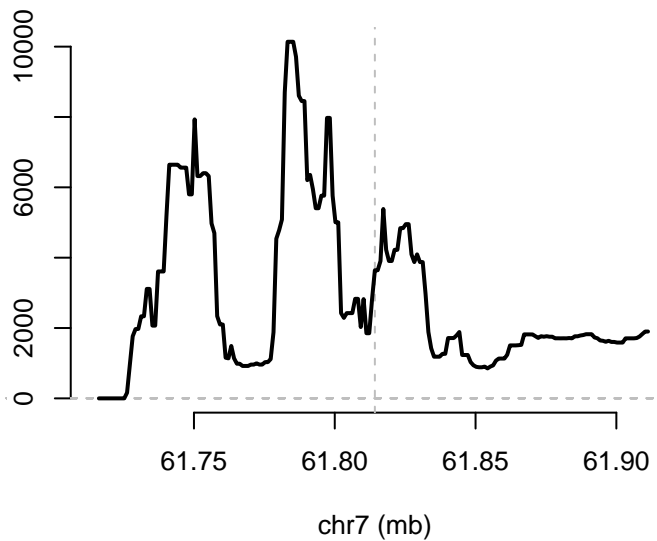

K562 chr7:61,736,653::chr7:61,814,243--

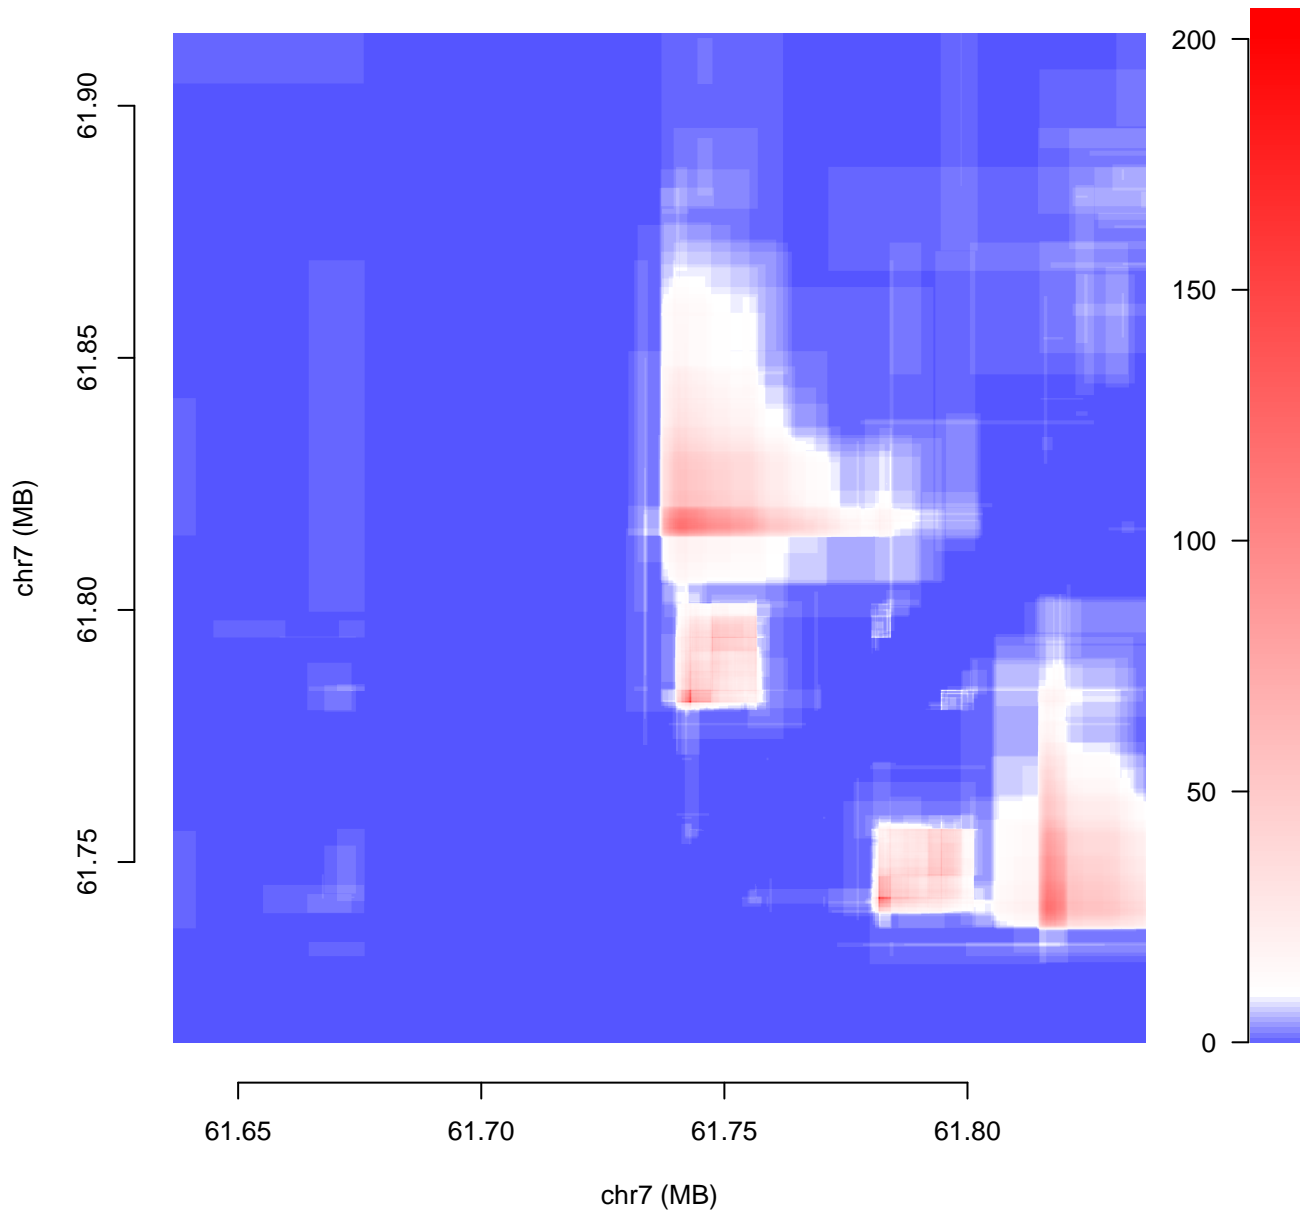

Supplement: Supplemental_Data.zip [file event_581.pdf › event_581.pdf]

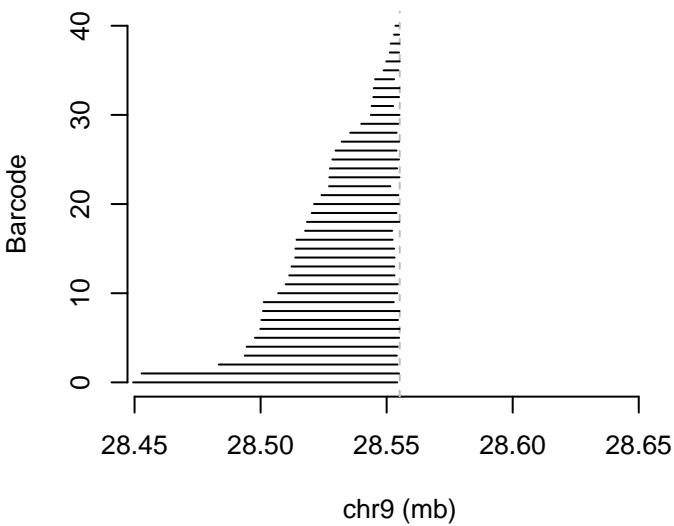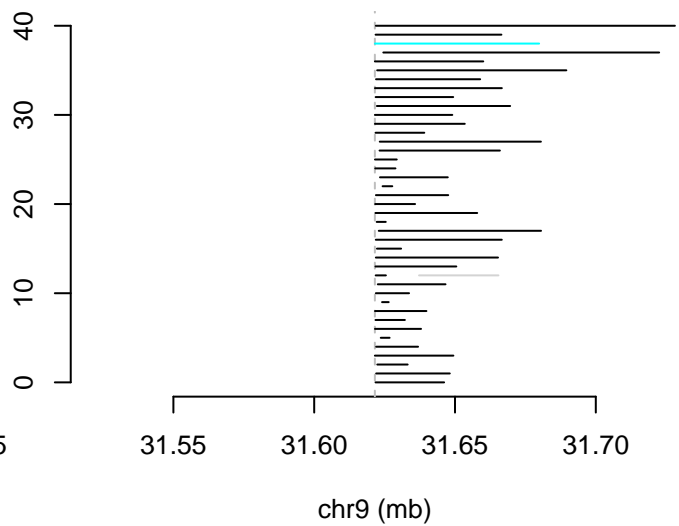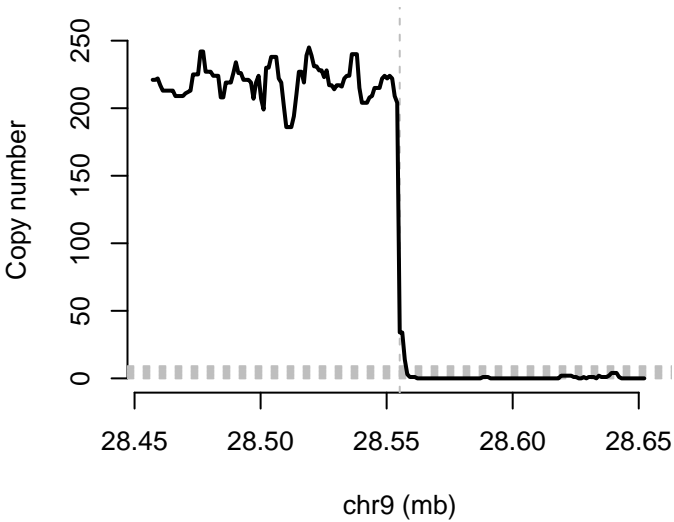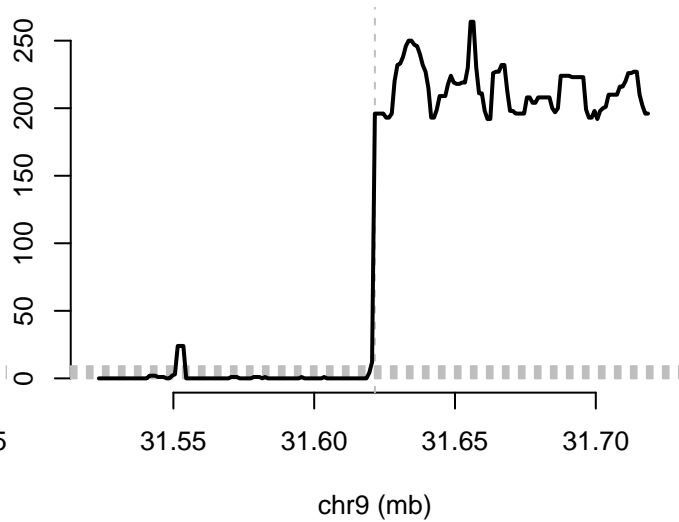

K562 chr9:28,555,195::chr9:31,621,544+-

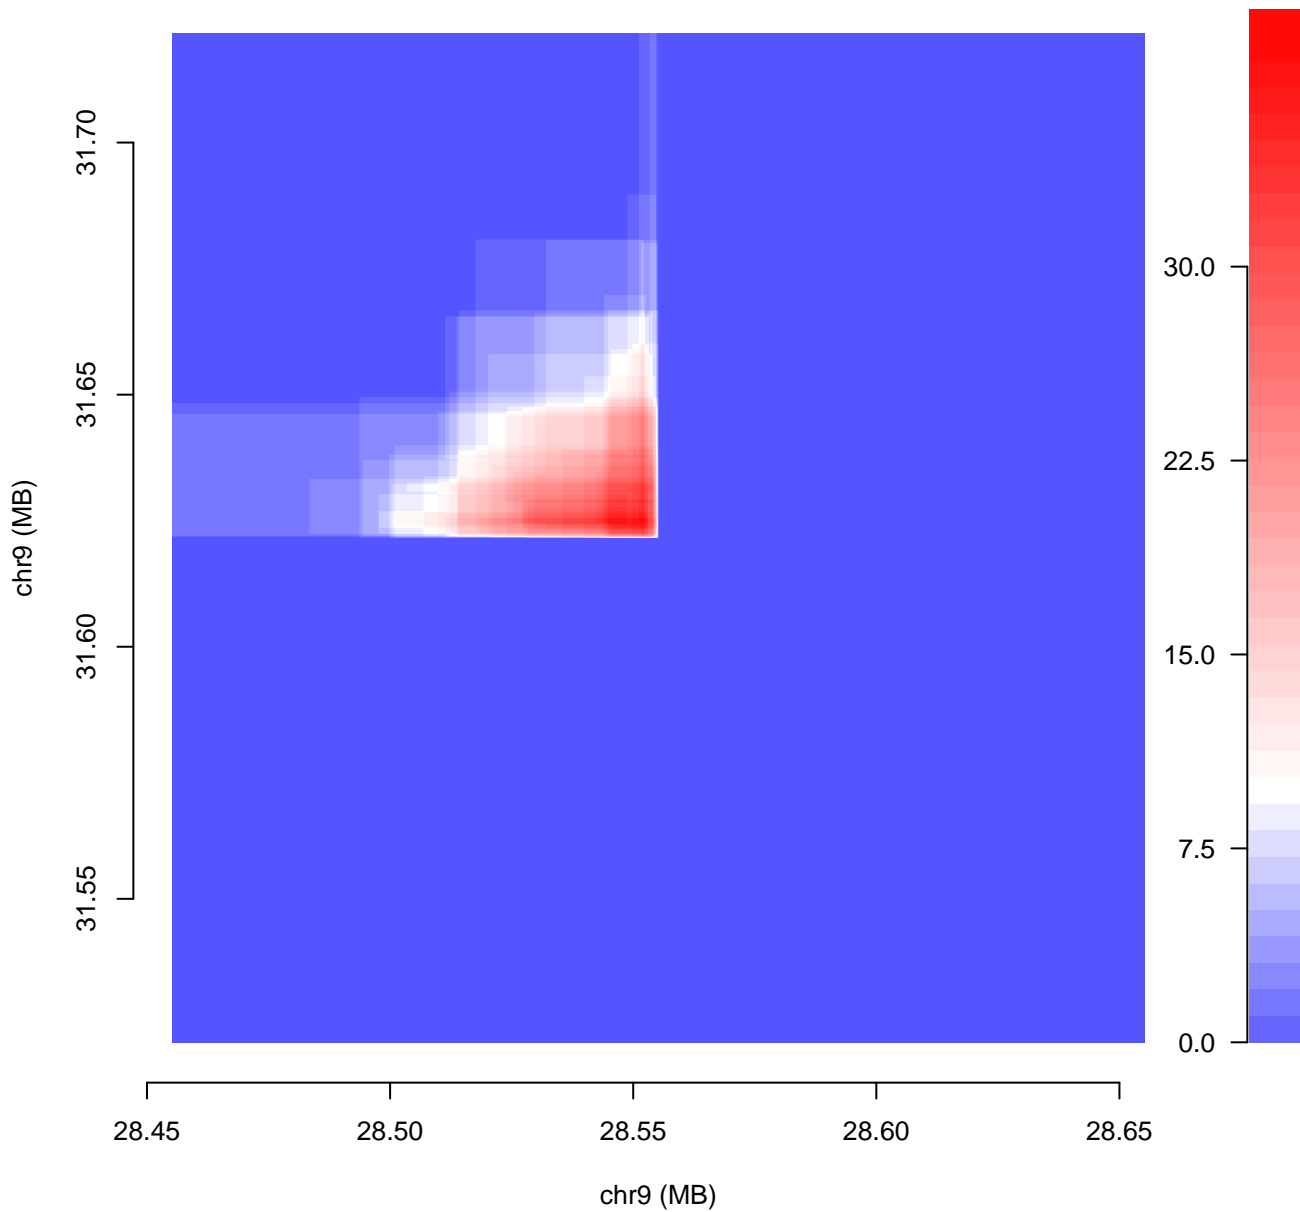

Supplement: Supplemental_Data.zip [file event_582.pdf › event_582.pdf]

Barcode

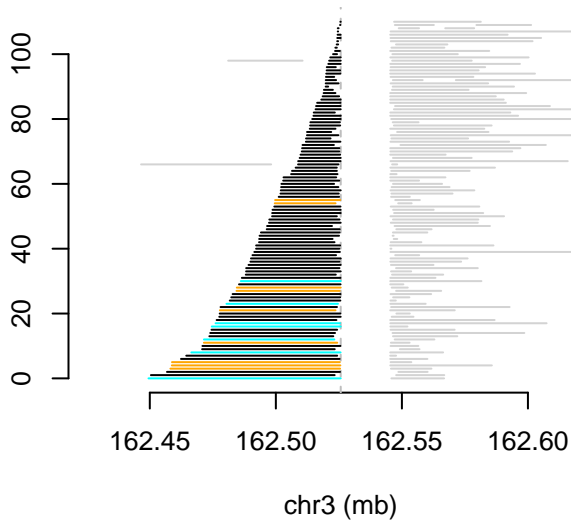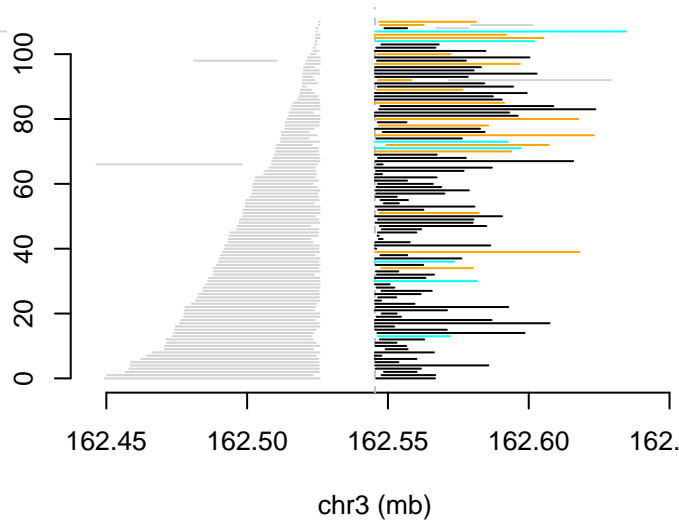

Copy number

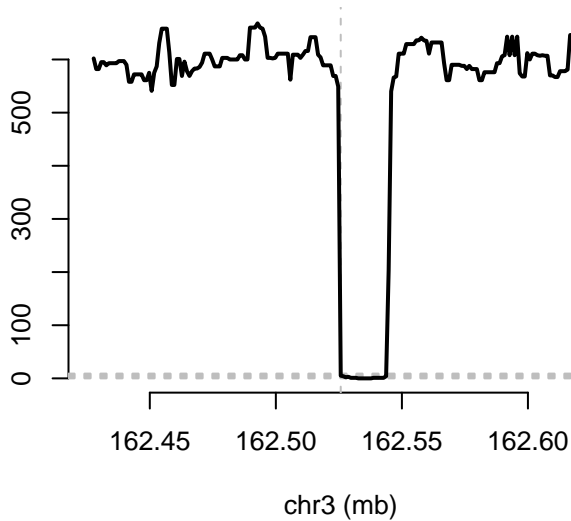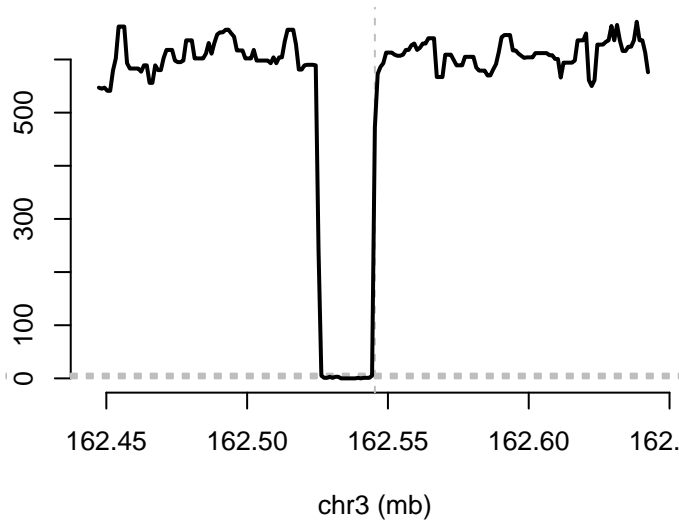

K562 chr3:162,545,361::chr3:162,525,742-+

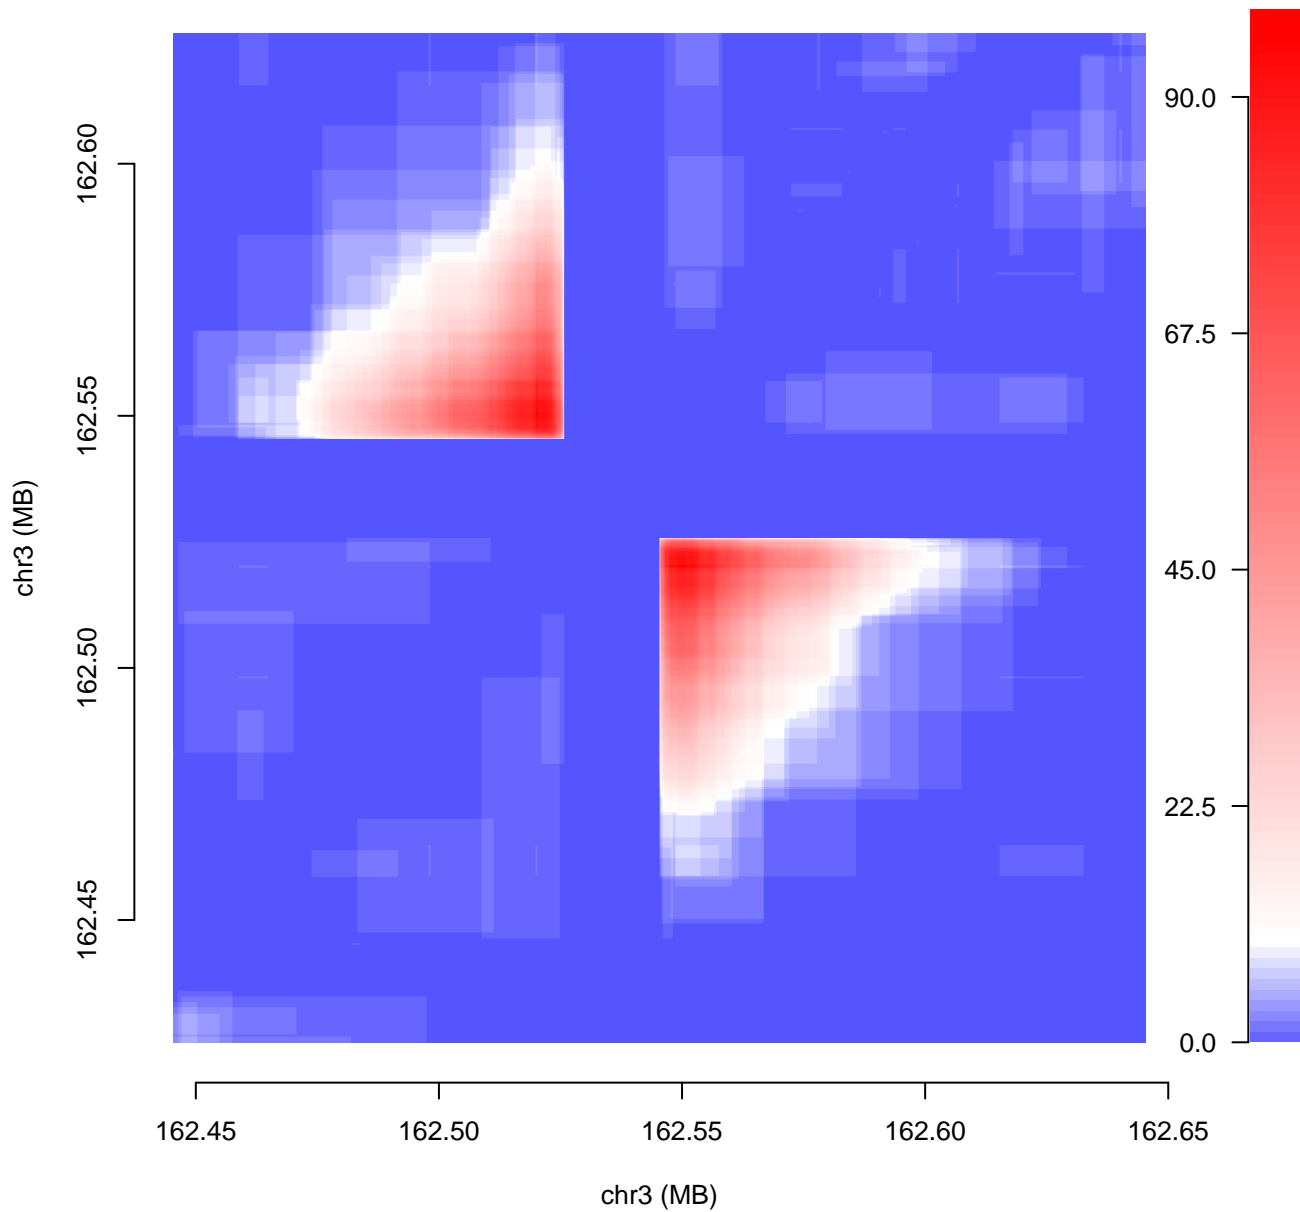

Supplement: Supplemental_Data.zip [file event_583.pdf › event_583.pdf]

Barcode

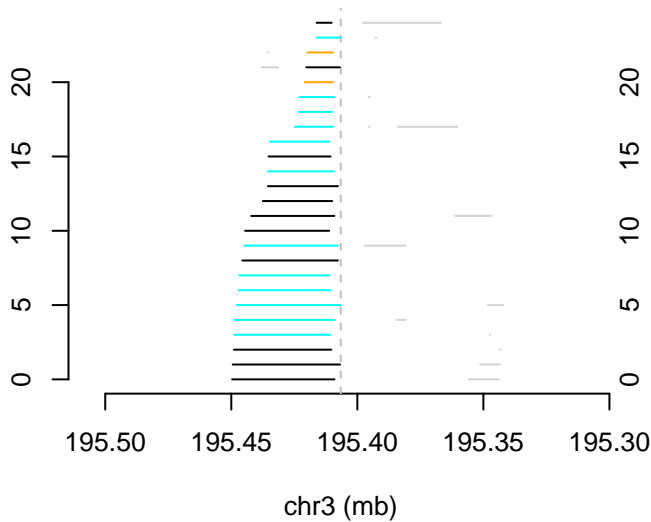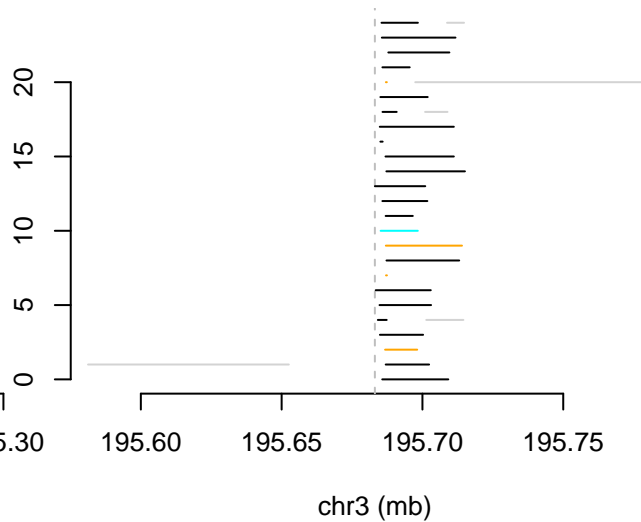

Copy number

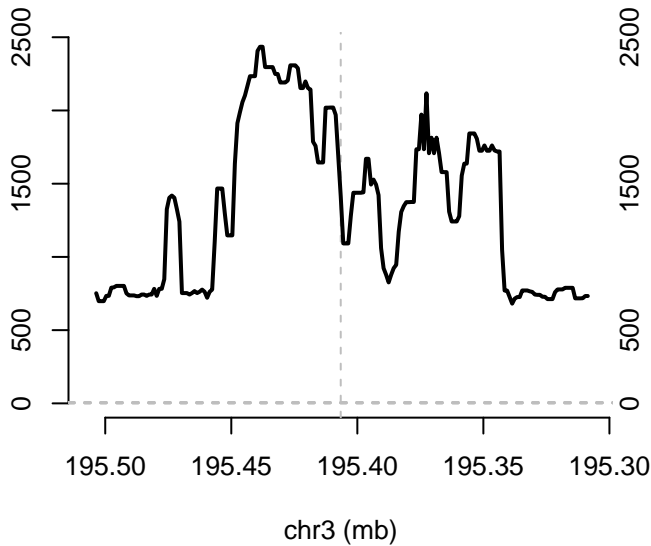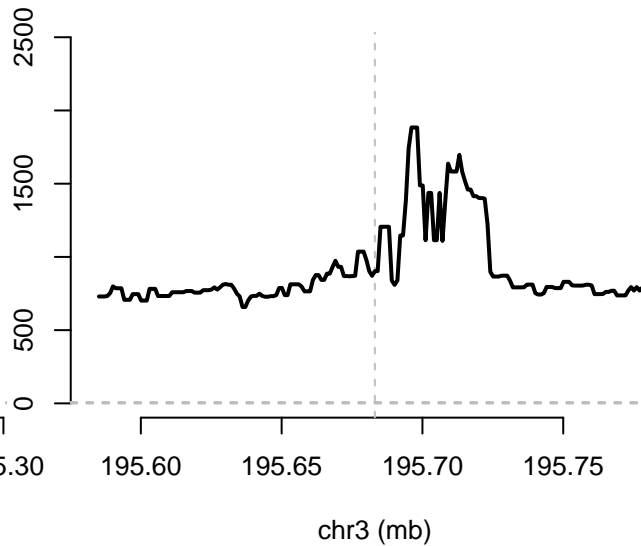

K562 chr3:195,406,584::chr3:195,683,110--

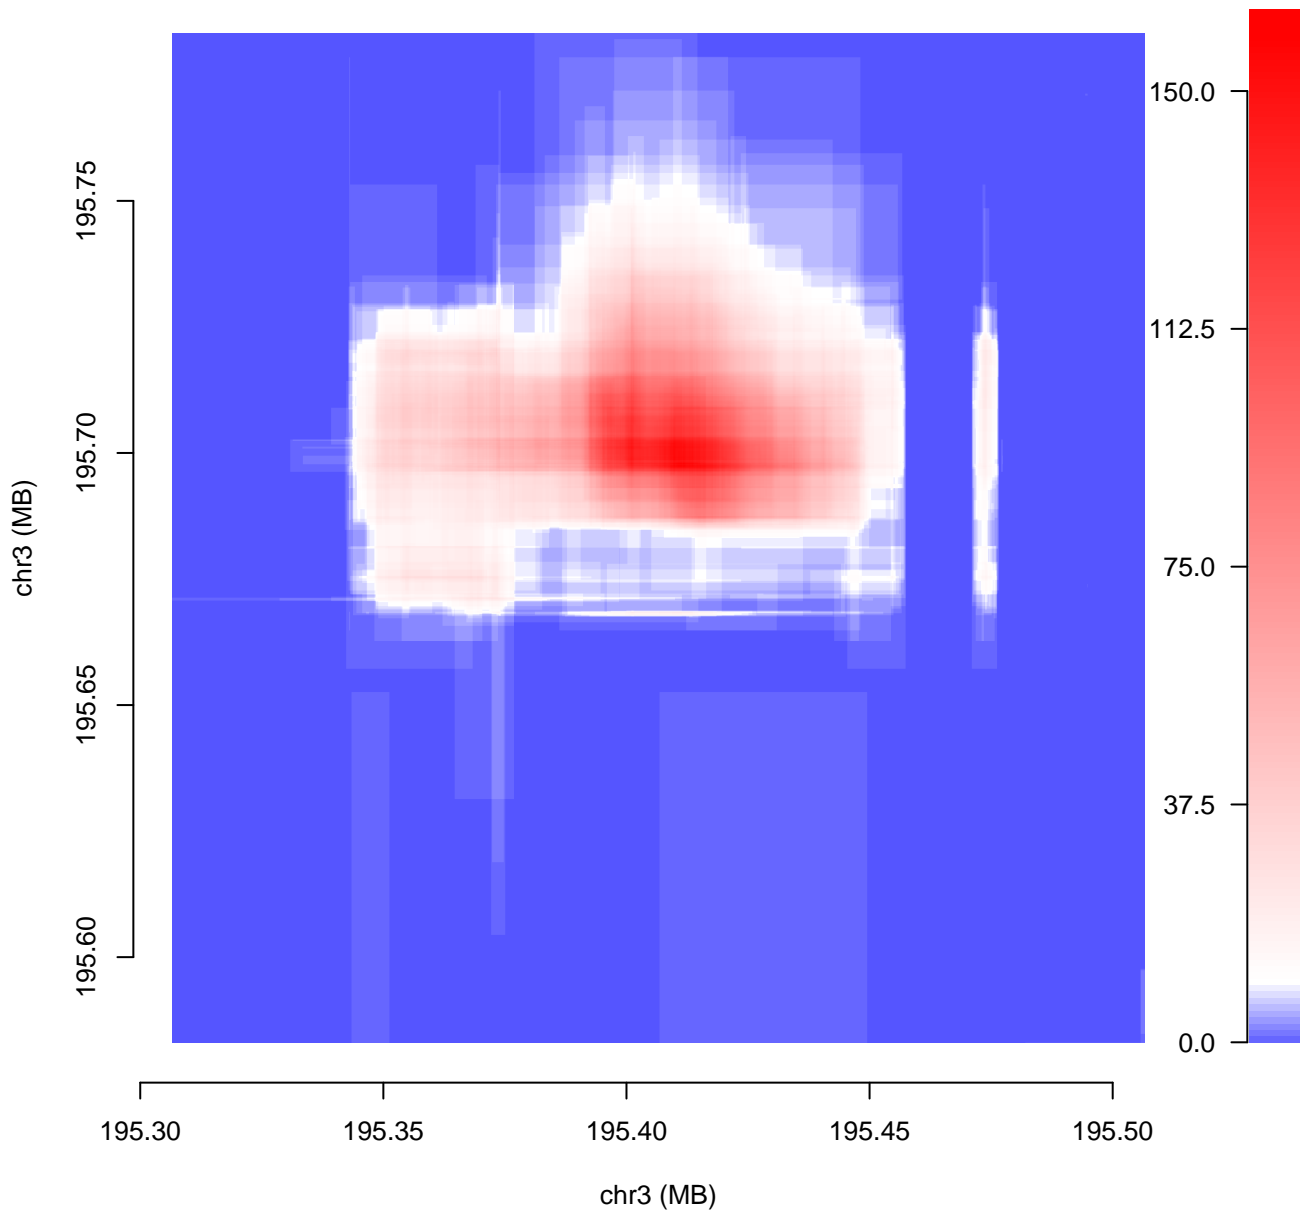

Supplement: Supplemental_Data.zip [file event_584.pdf › event_584.pdf]

Barcode

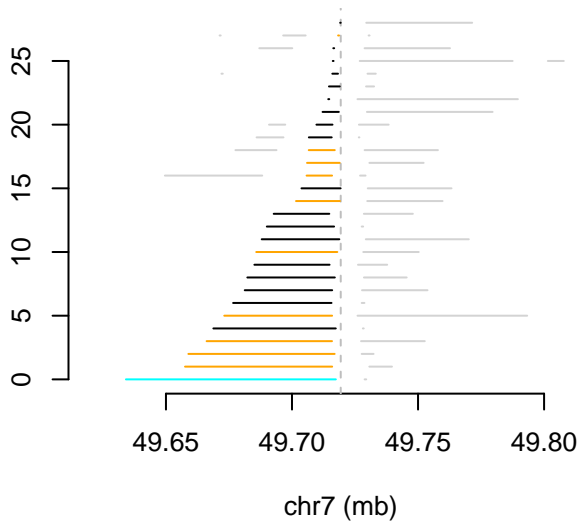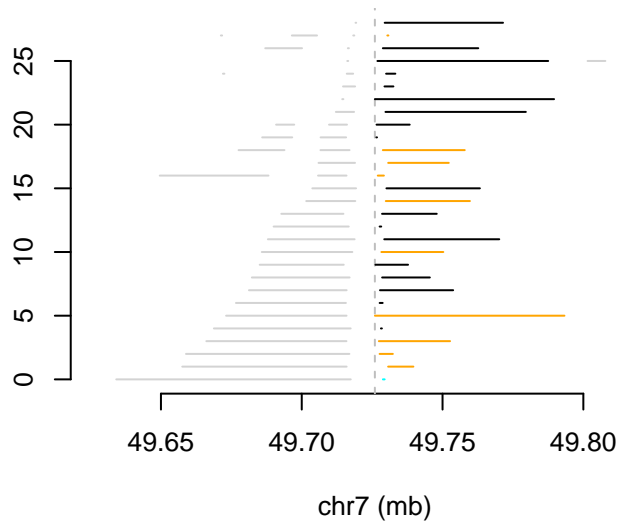

Copy number

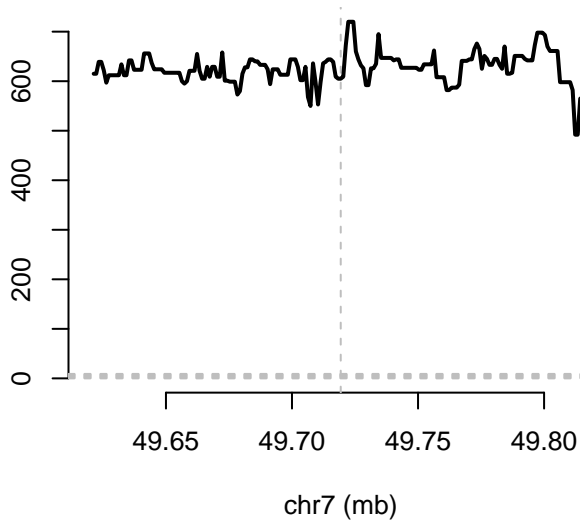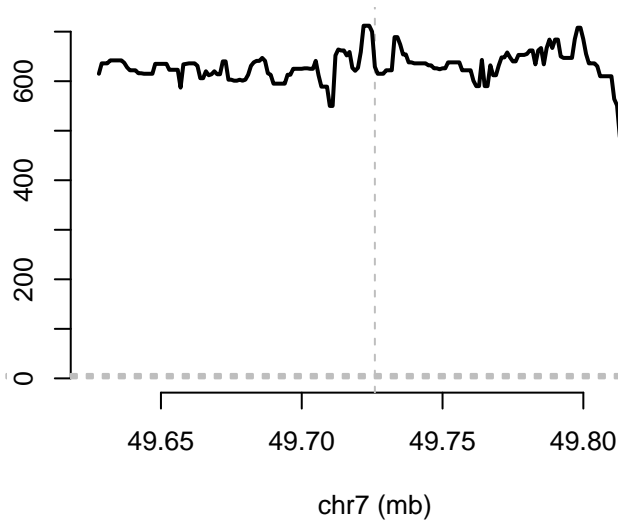

K562 chr7:49,719,339::chr7:49,725,970+-

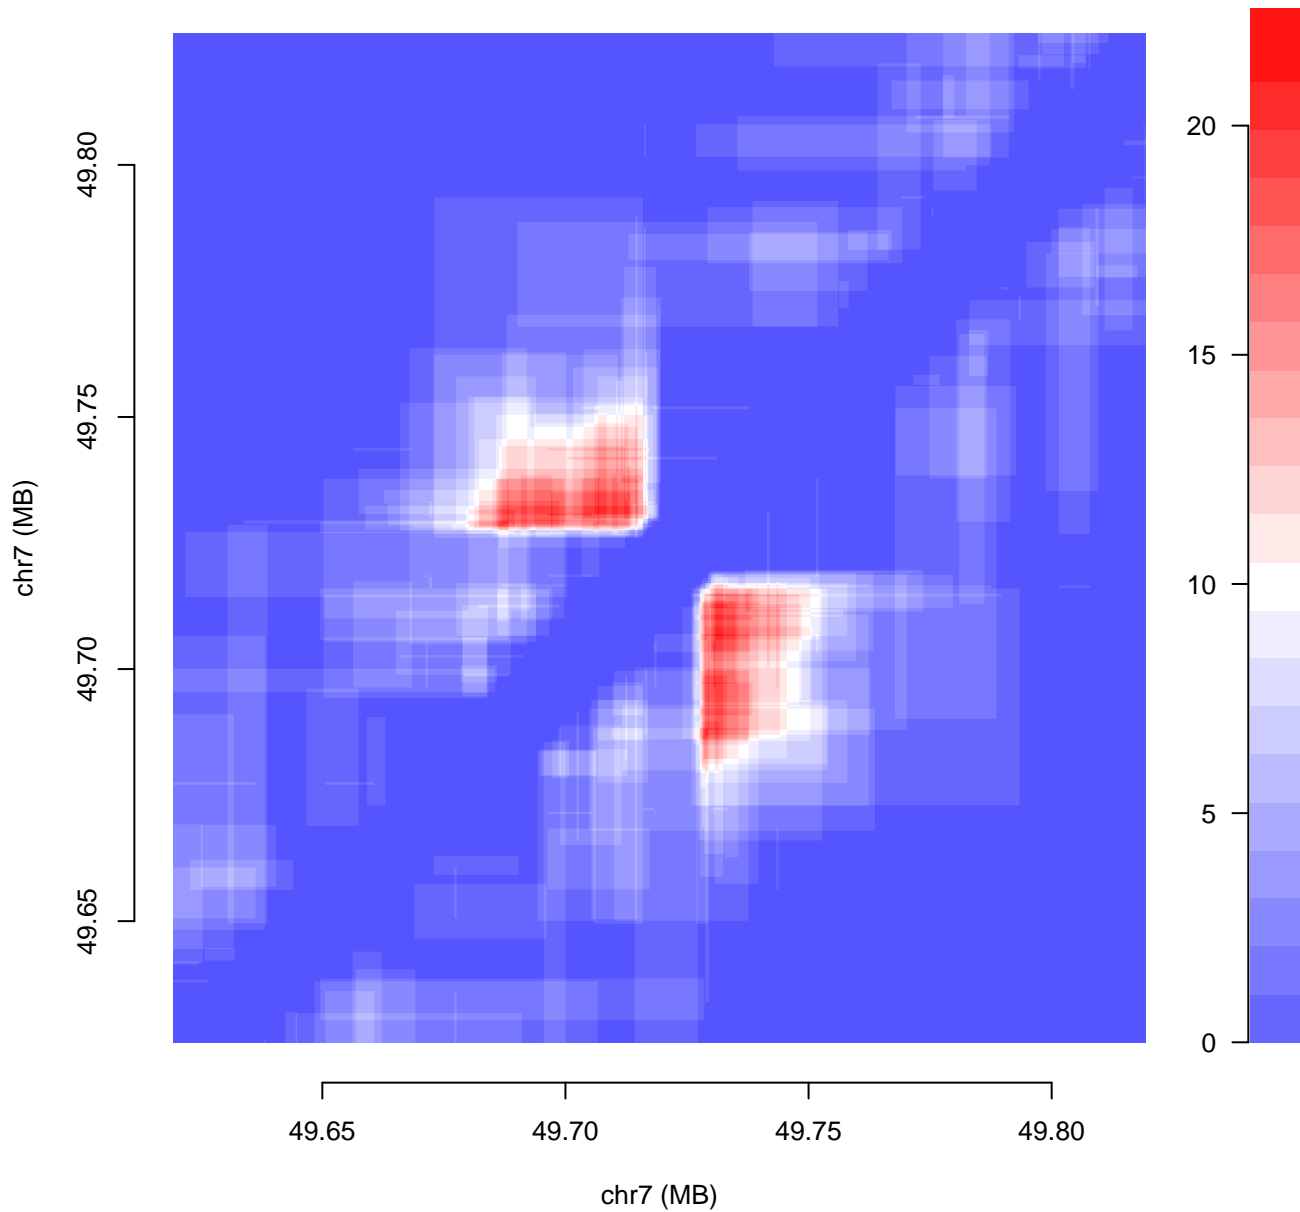

Supplement: Supplemental_Data.zip [file event_585.pdf › event_585.pdf]

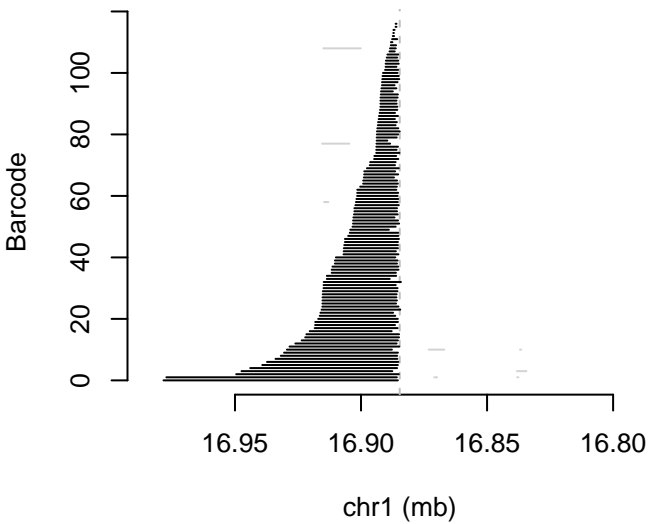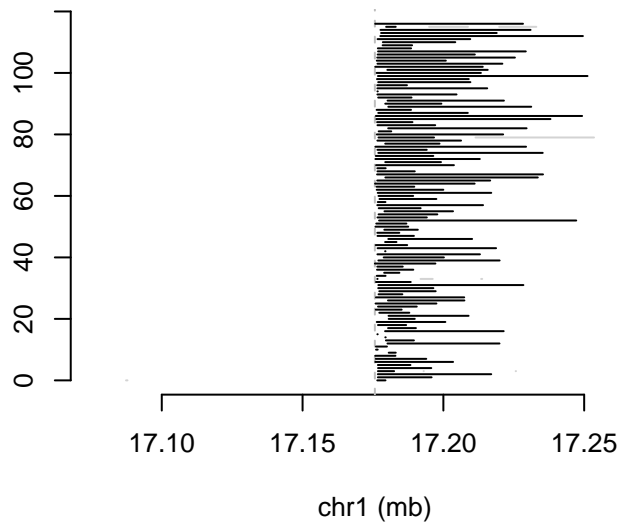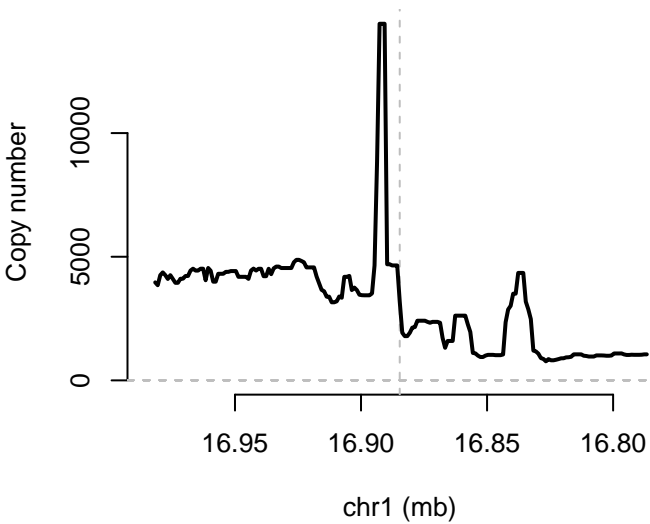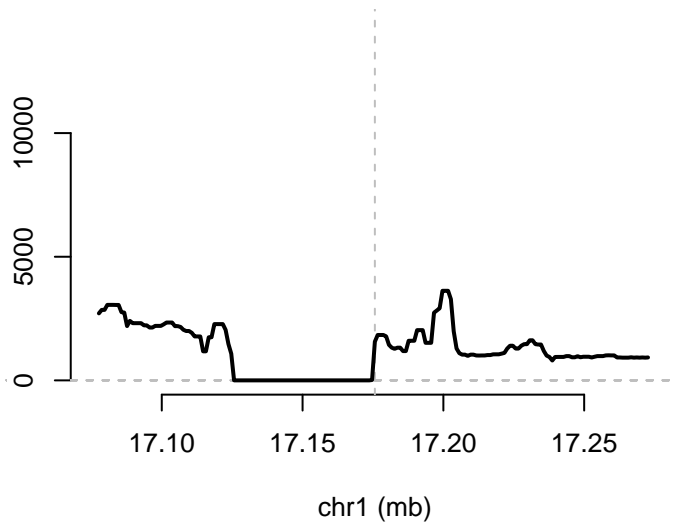

K562 chr1:17,175,676::chr1:16,884,638--

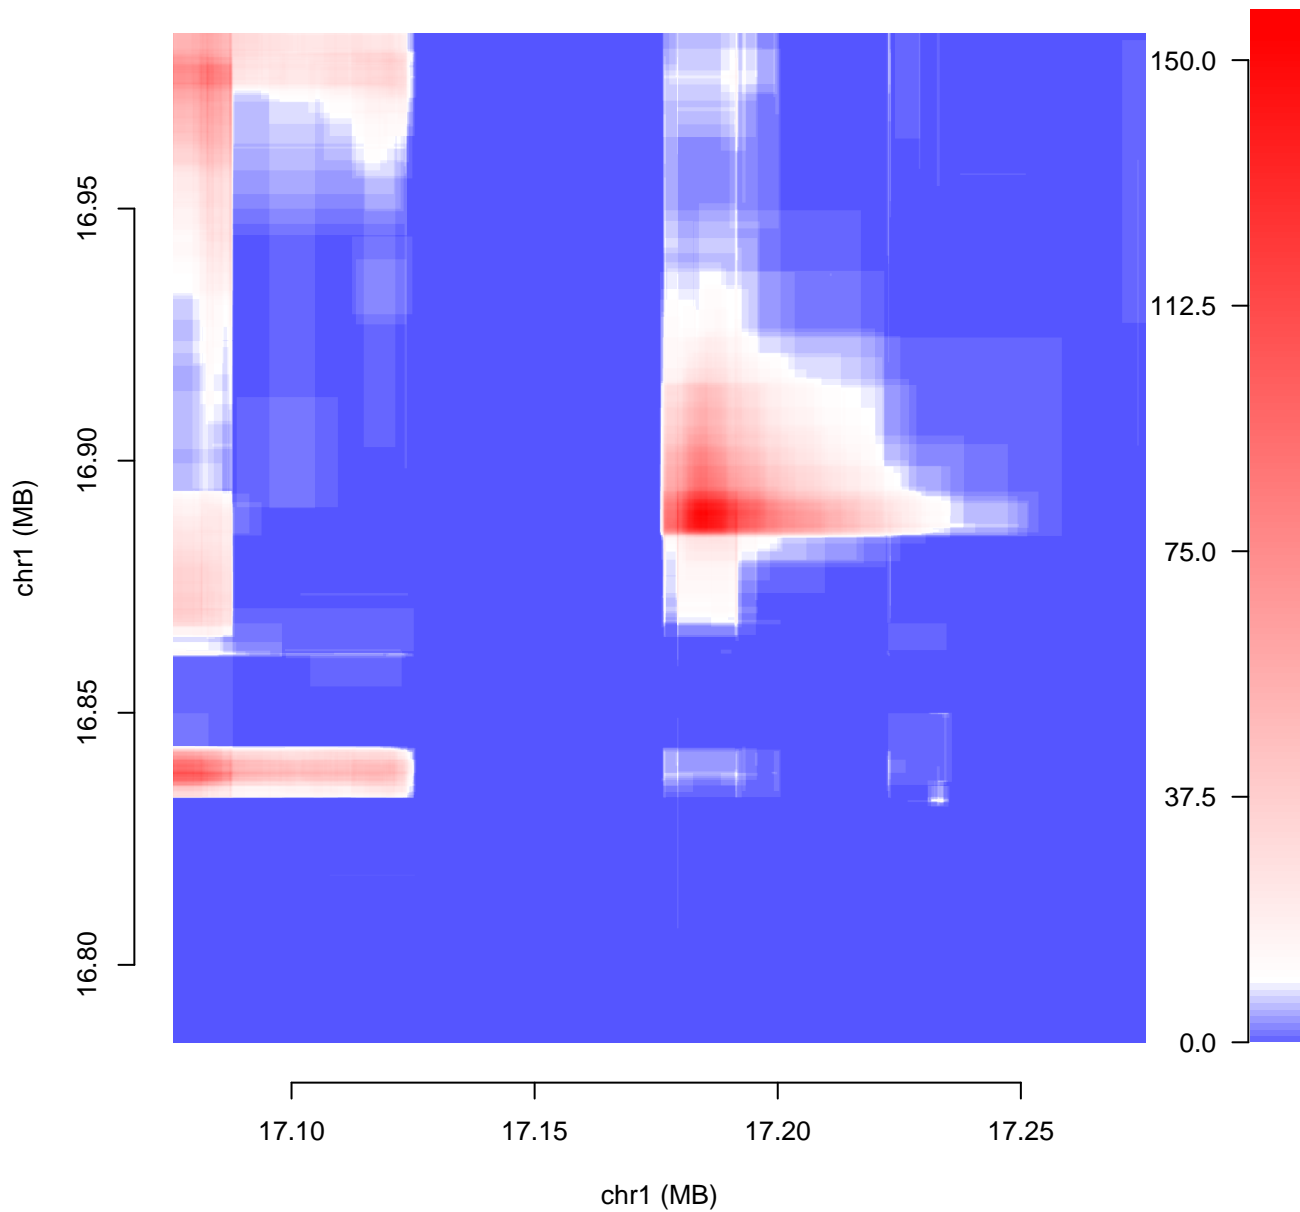

Supplement: Supplemental_Data.zip [file event_586.pdf › event_586.pdf]

Barcode

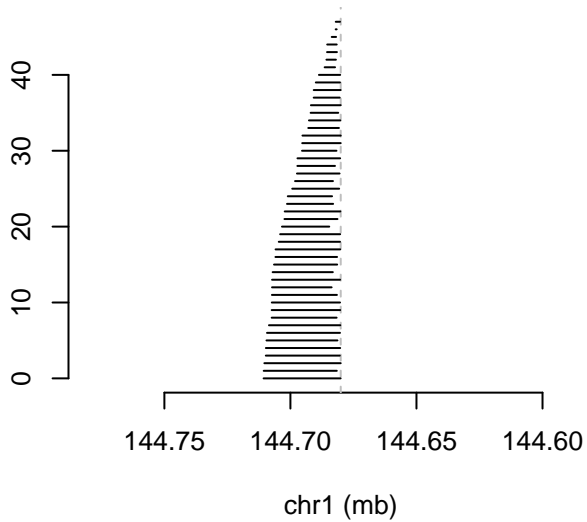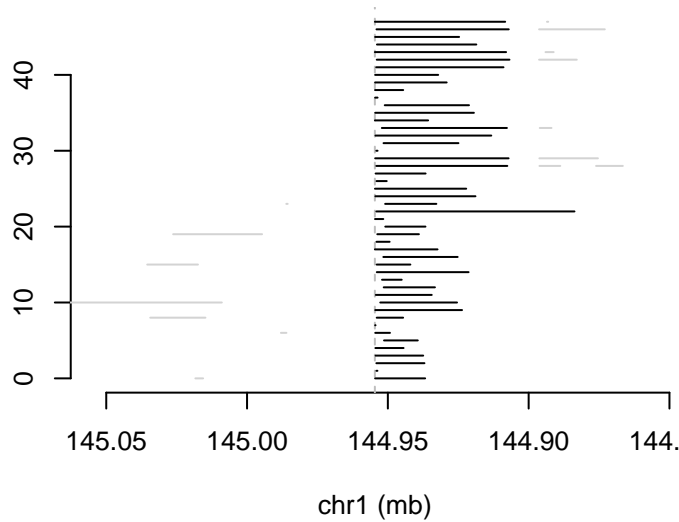

Copy number

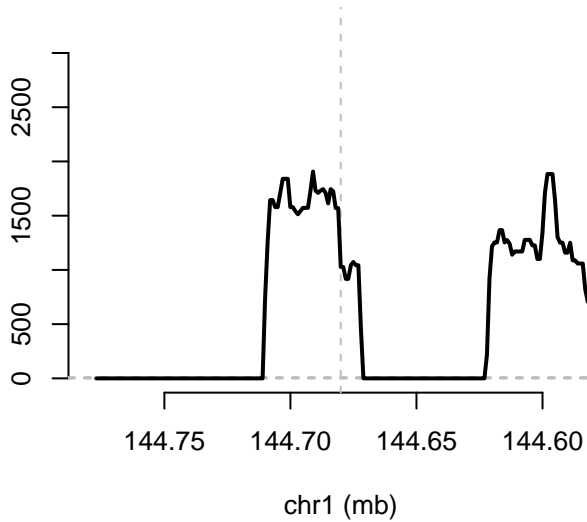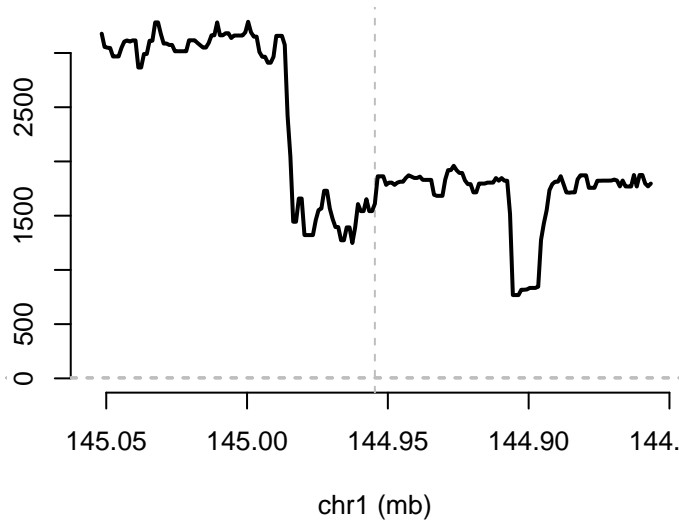

K562 chr1:144,954,614::chr1:144,680,038+-

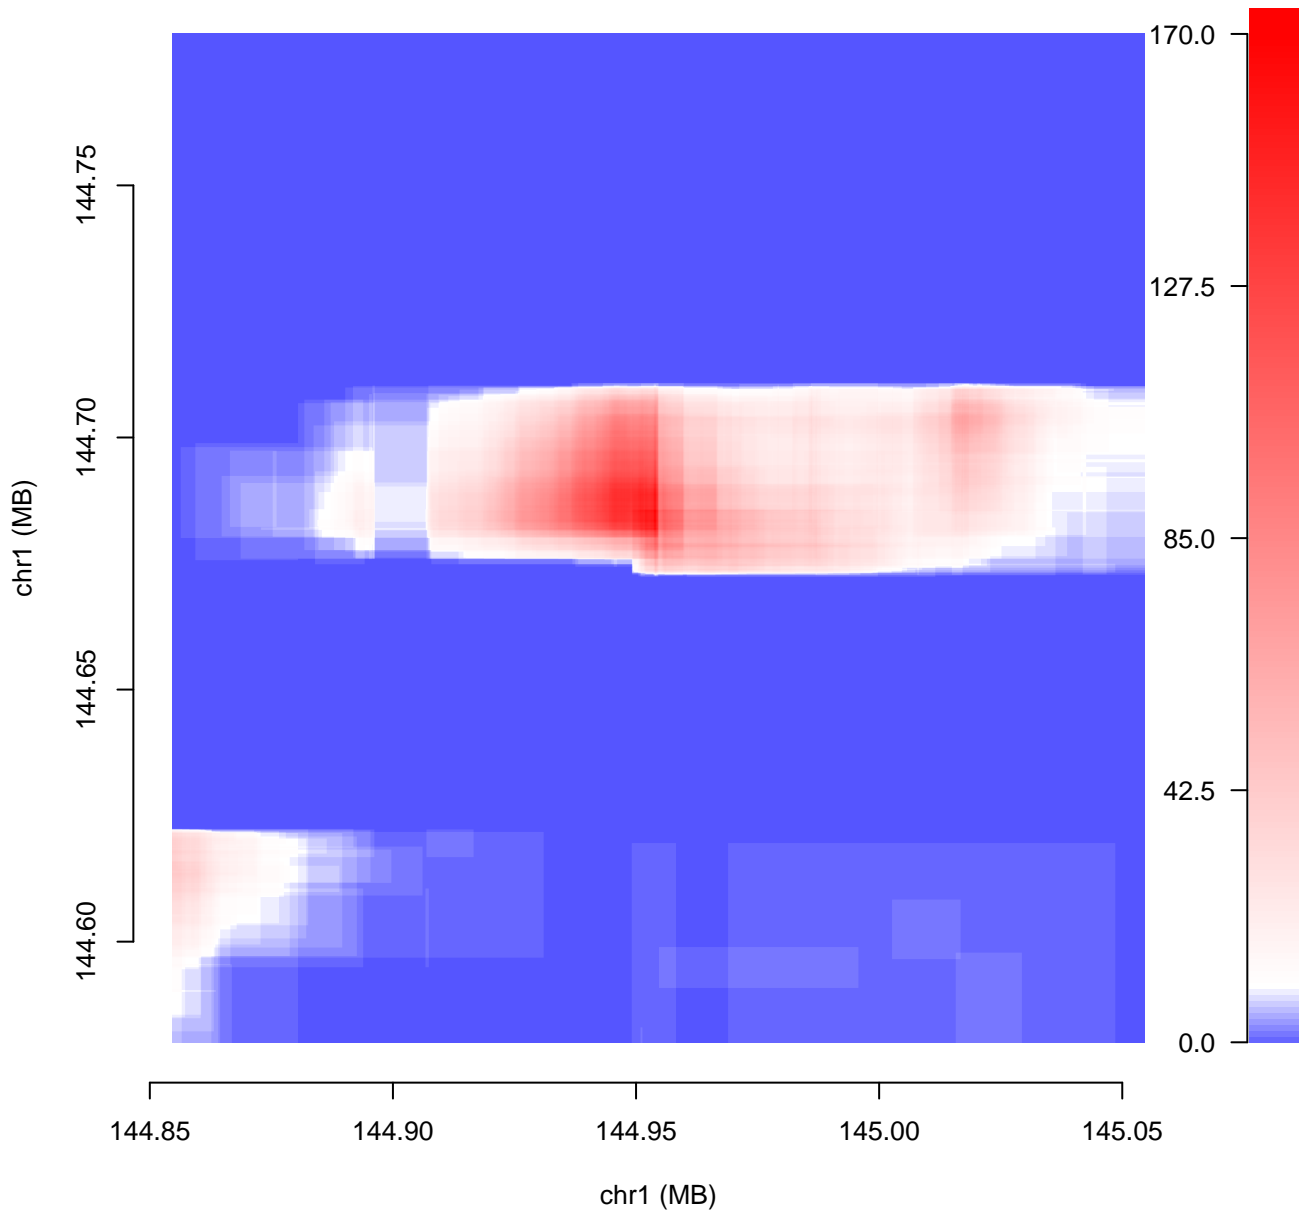

Supplement: Supplemental_Data.zip [file event_587.pdf › event_587.pdf]

Barcode

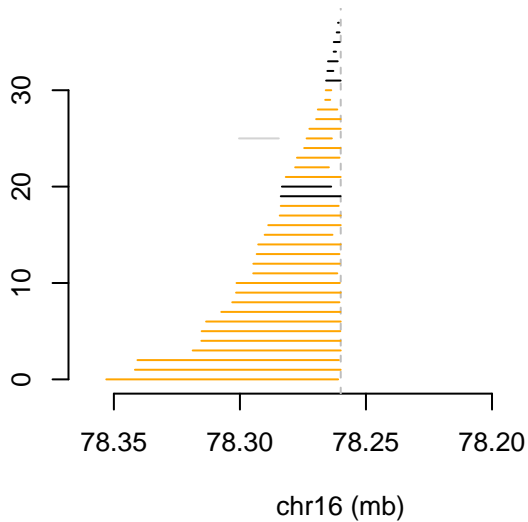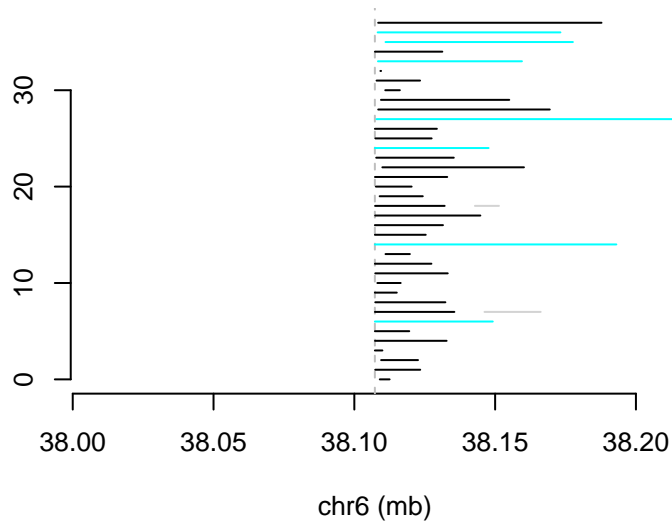

Copy number

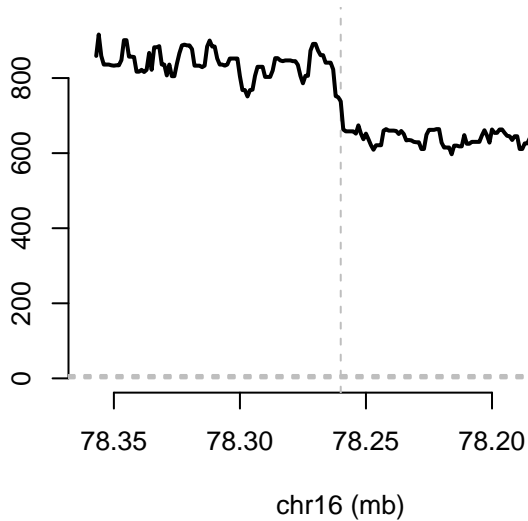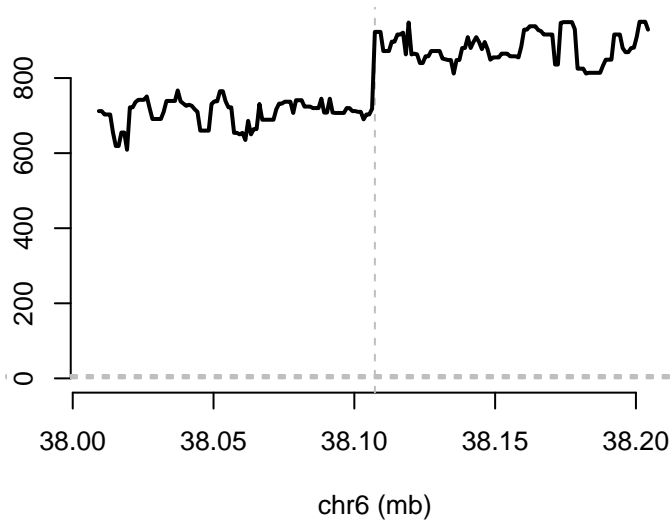

K562 chr6:38,107,295::chr16:78,260,007--

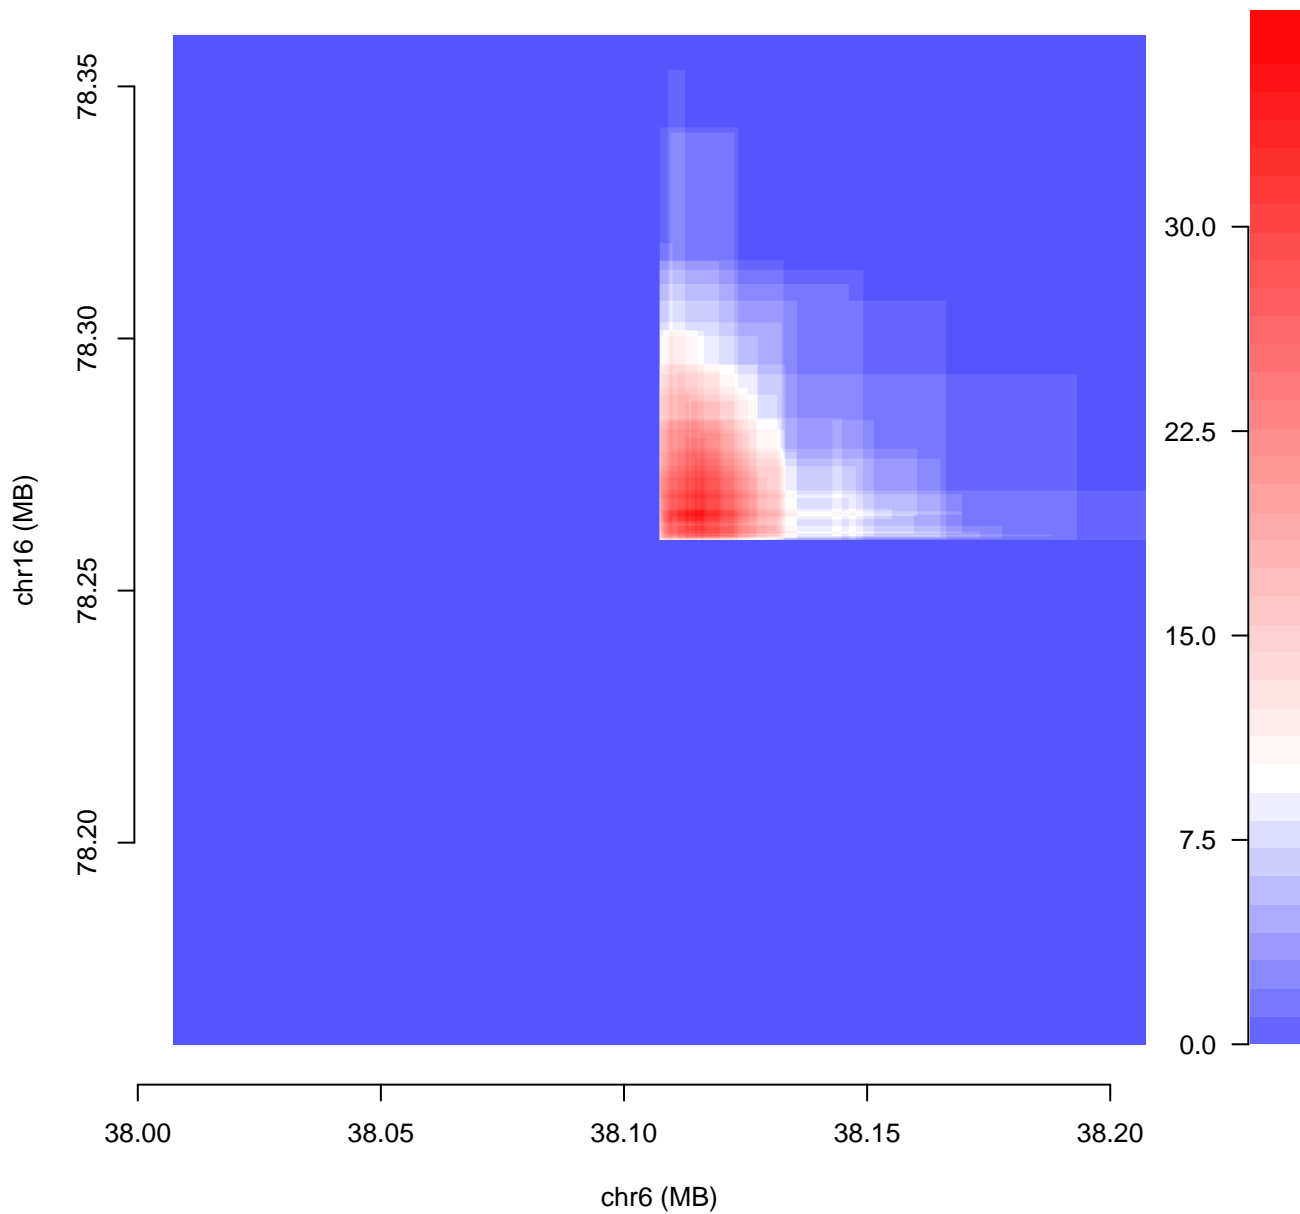

Supplement: Supplemental_Data.zip [file event_59.pdf › event_59.pdf]

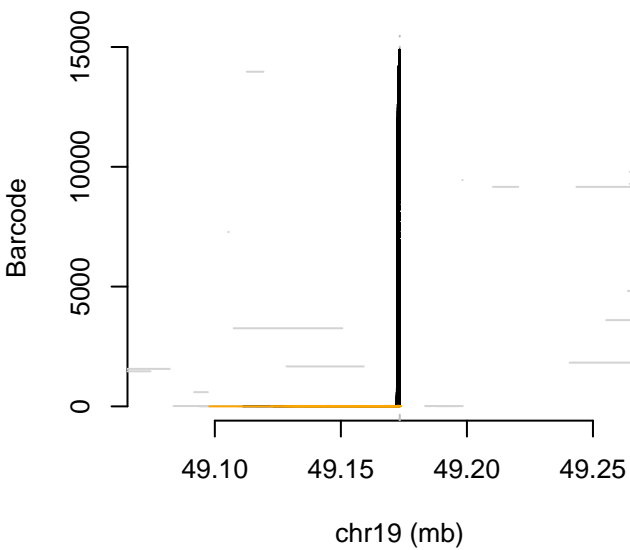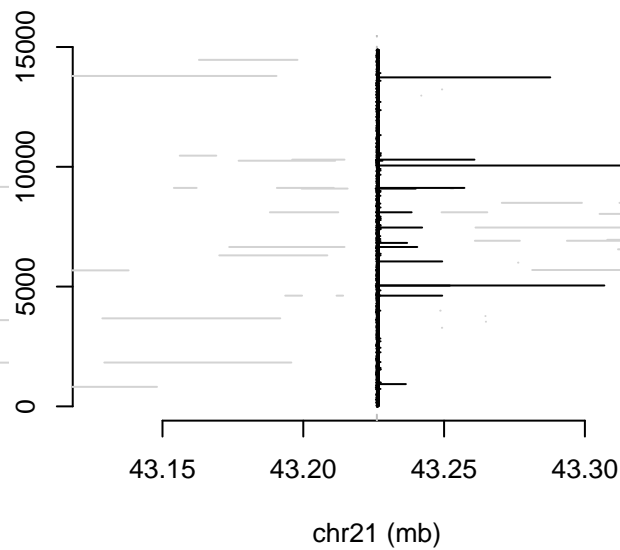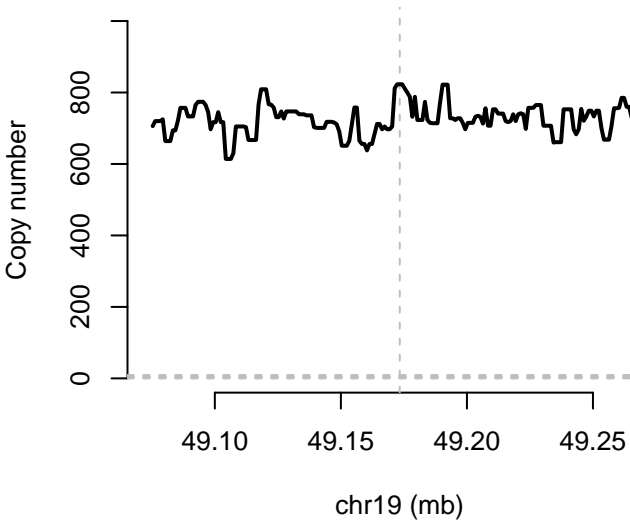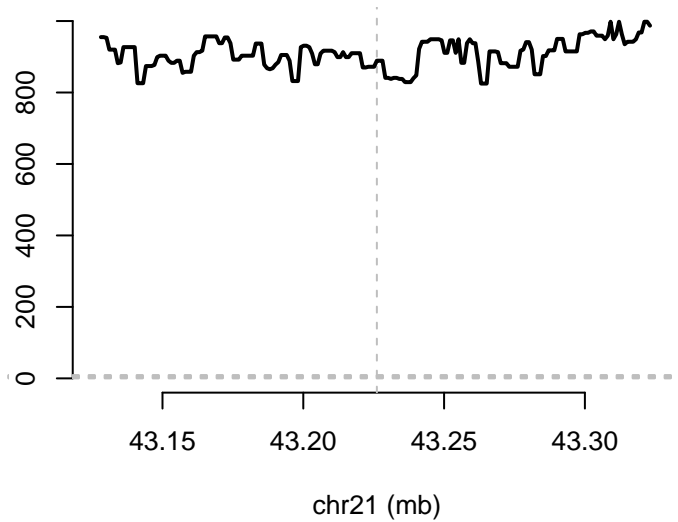

K562 chr19:49,173,350::chr21:43,226,133+-

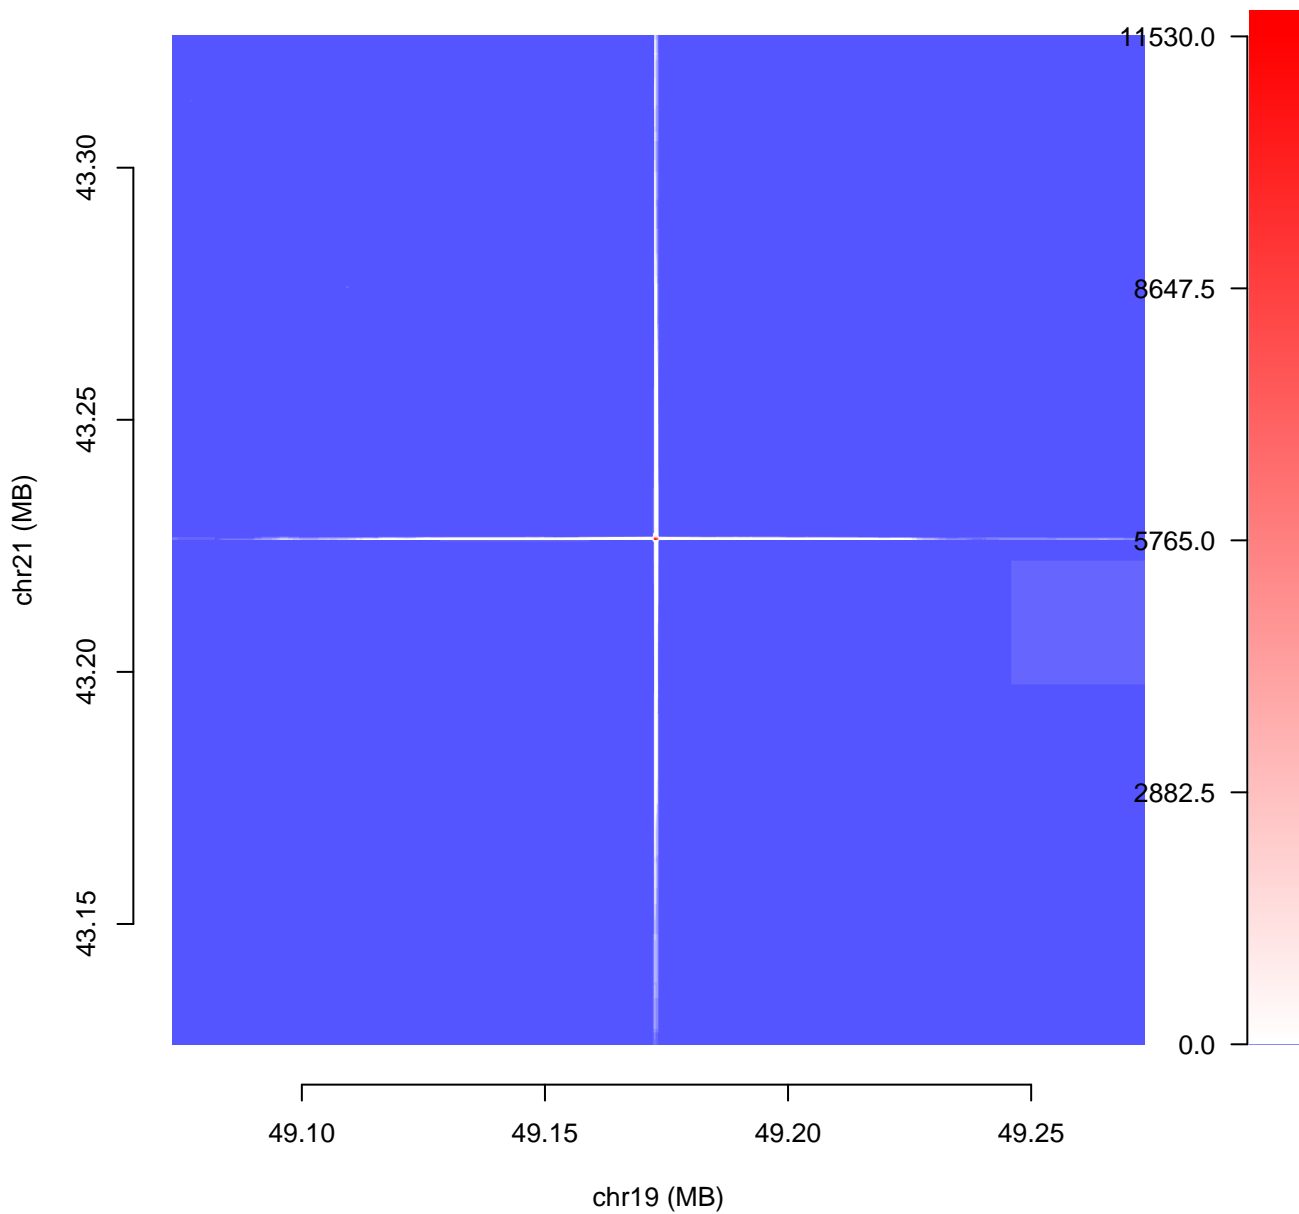

Supplement: Supplemental_Data.zip [file event_6.pdf › event_6.pdf]

Barcode

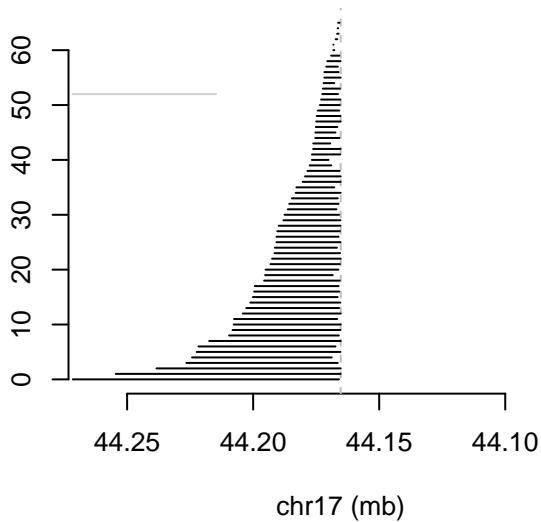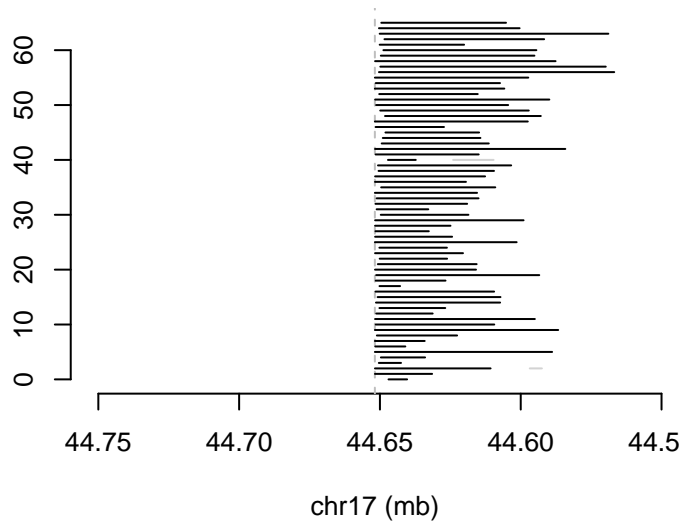

Copy number

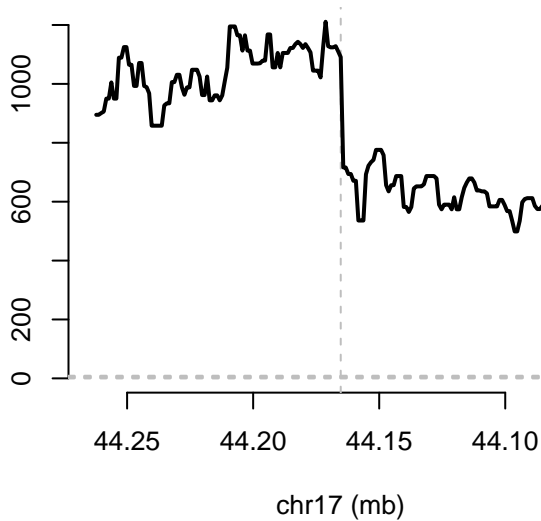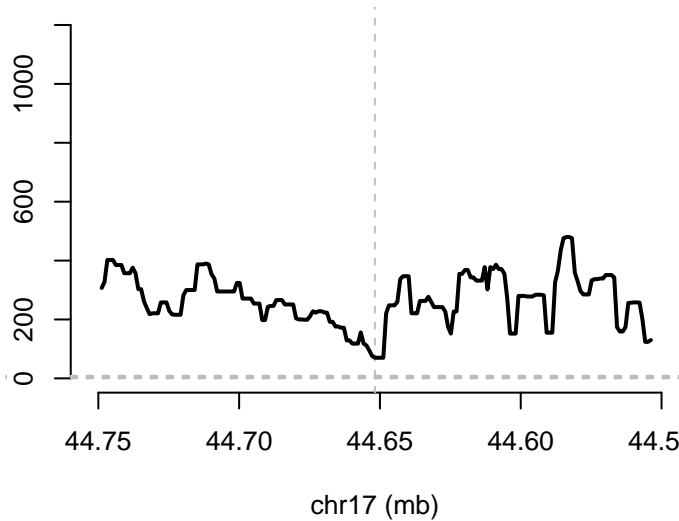

K562 chr17:44,165,258::chr17:44,651,801-+

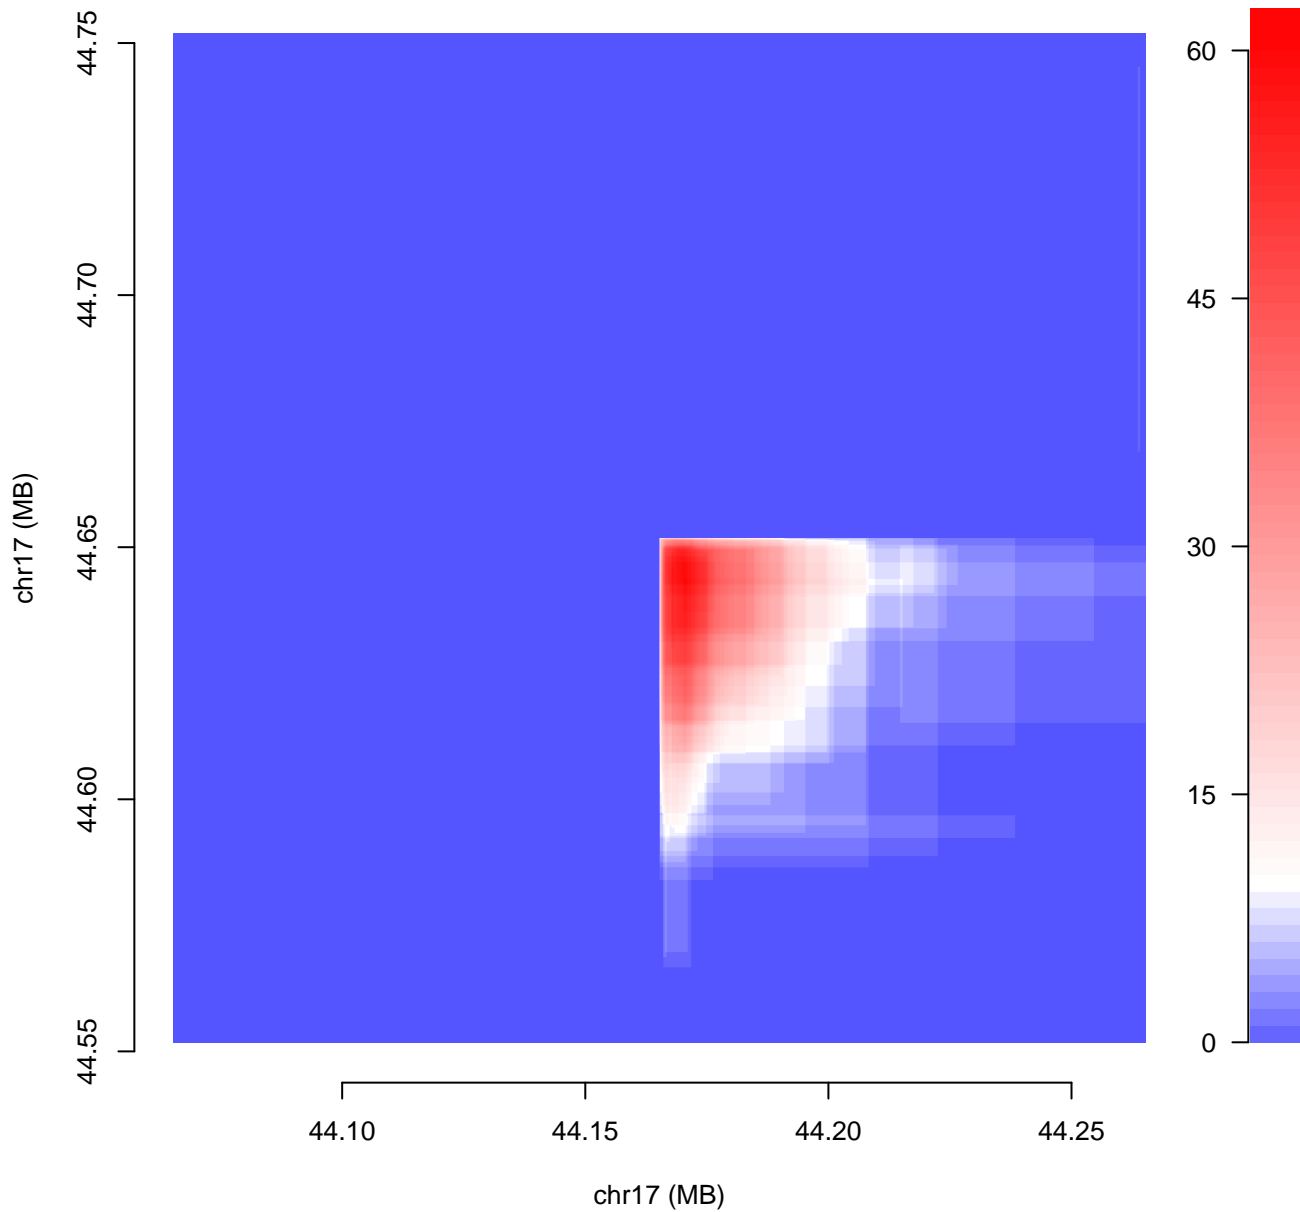

Supplement: Supplemental_Data.zip [file event_60.pdf › event_60.pdf]

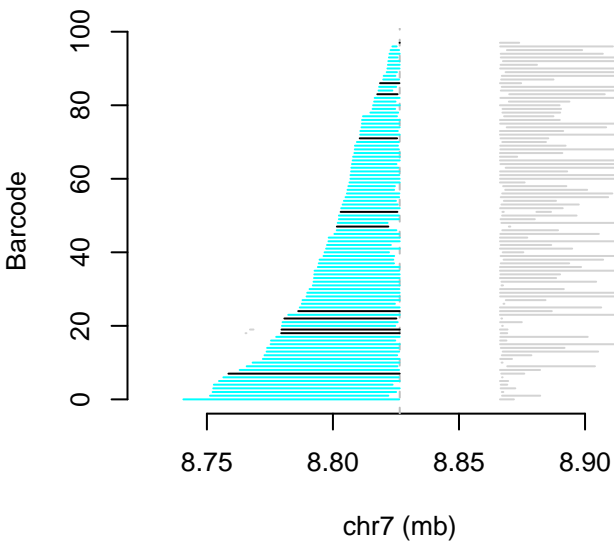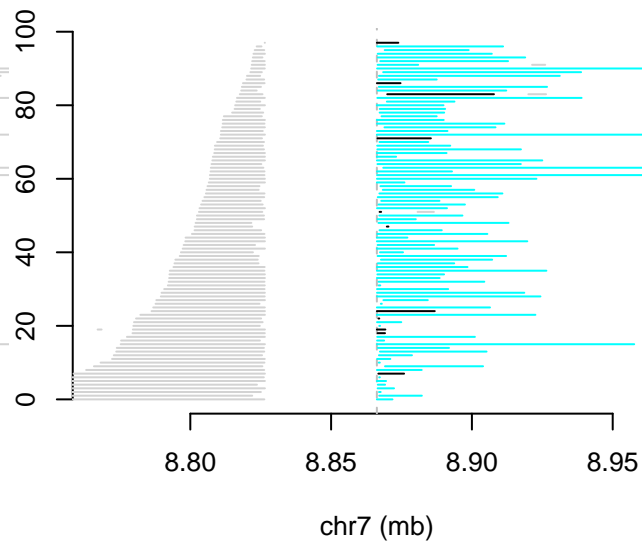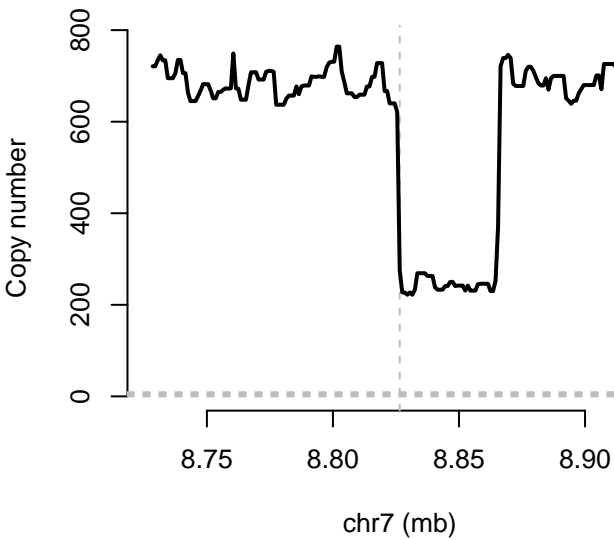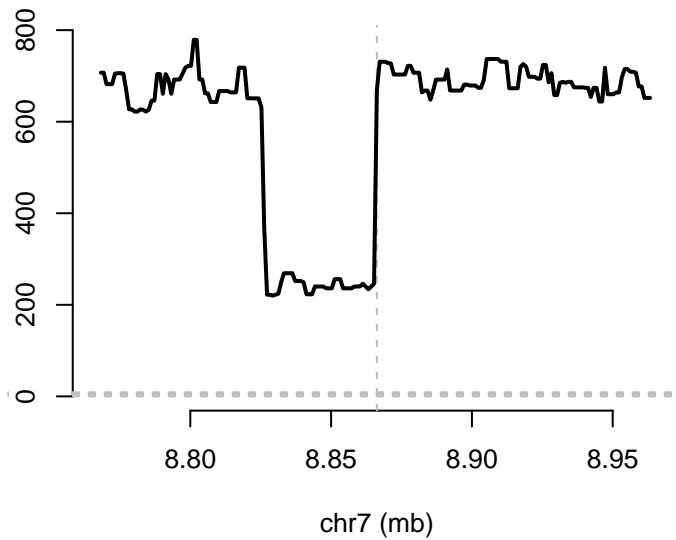

K562 chr7:8,826,500::chr7:8,866,251+-

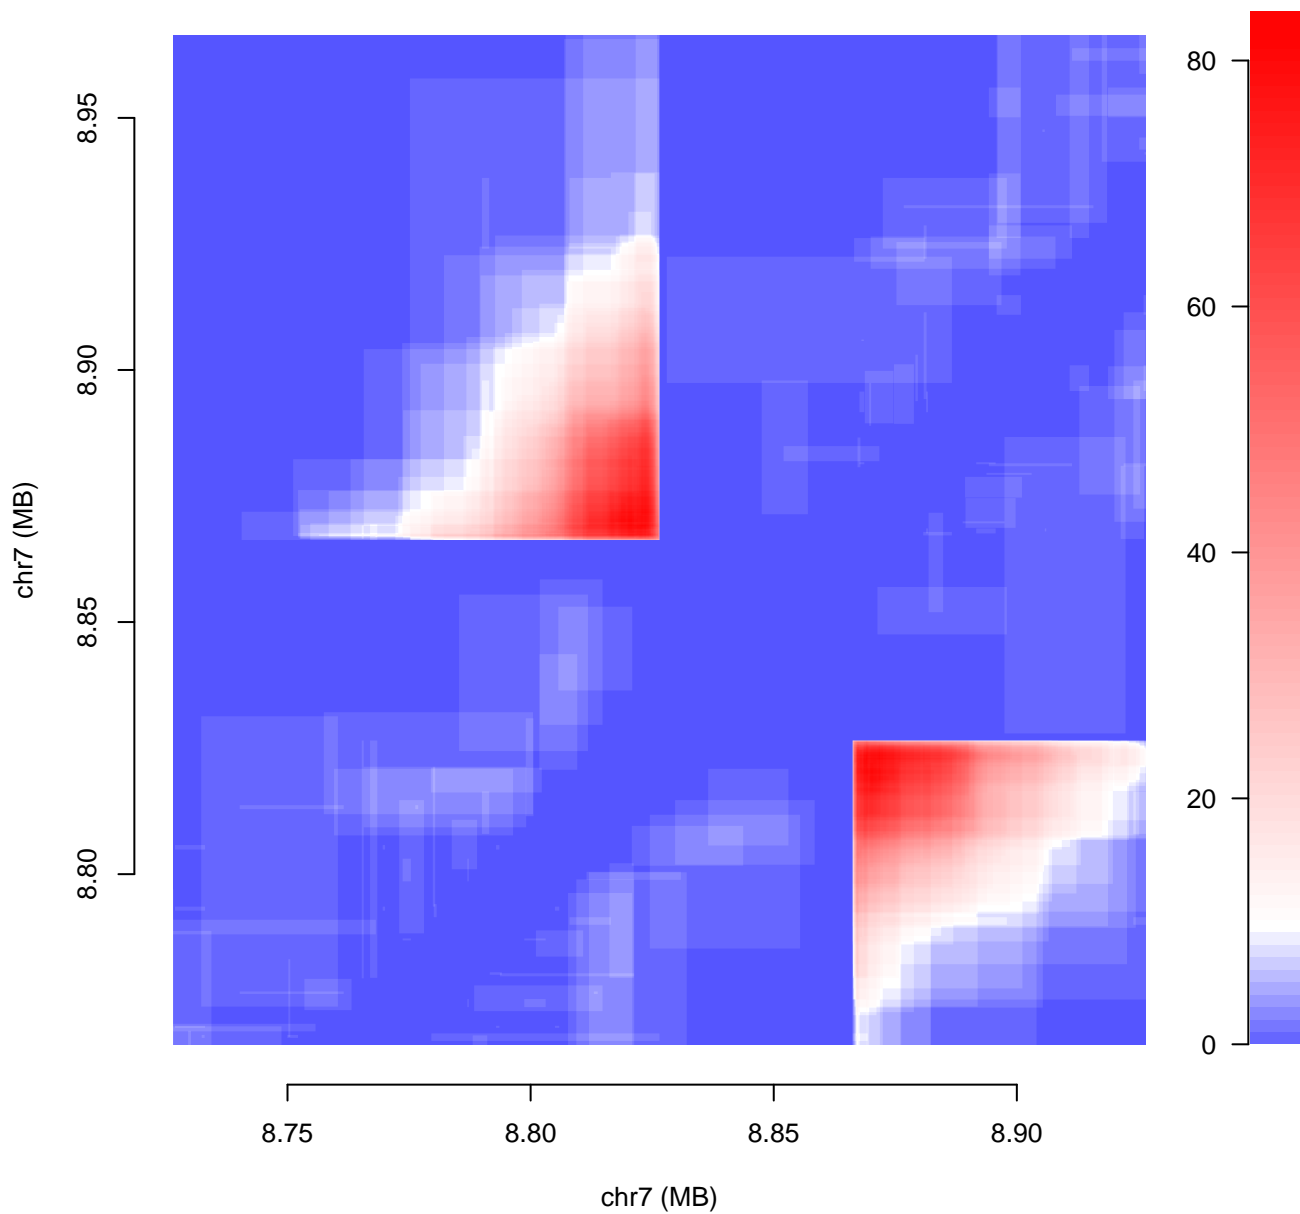

Supplement: Supplemental_Data.zip [file event_61.pdf › event_61.pdf]

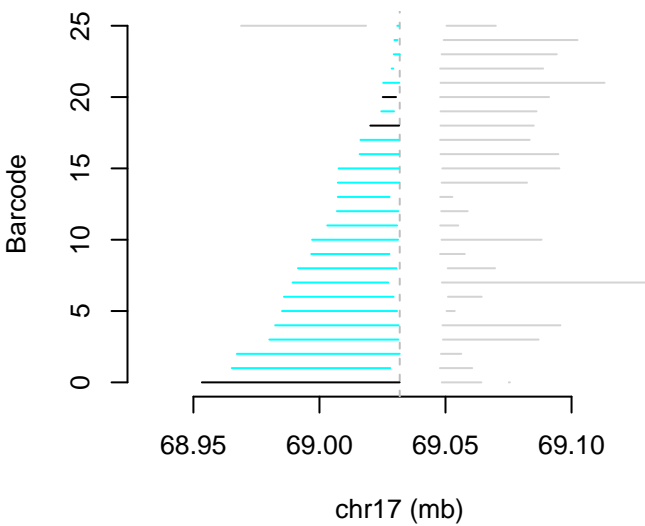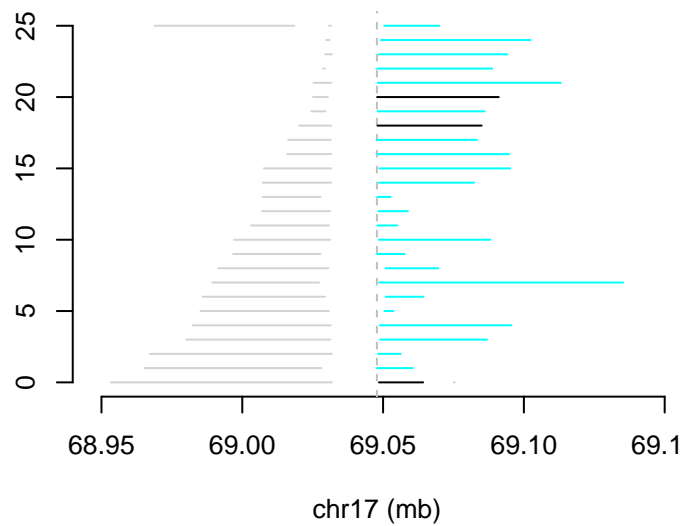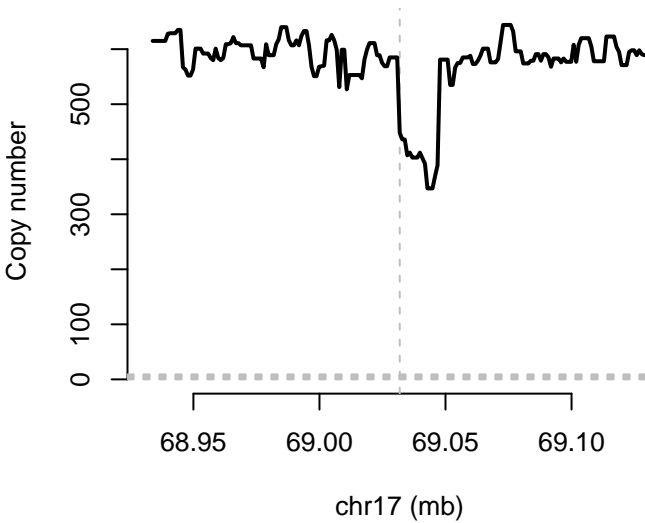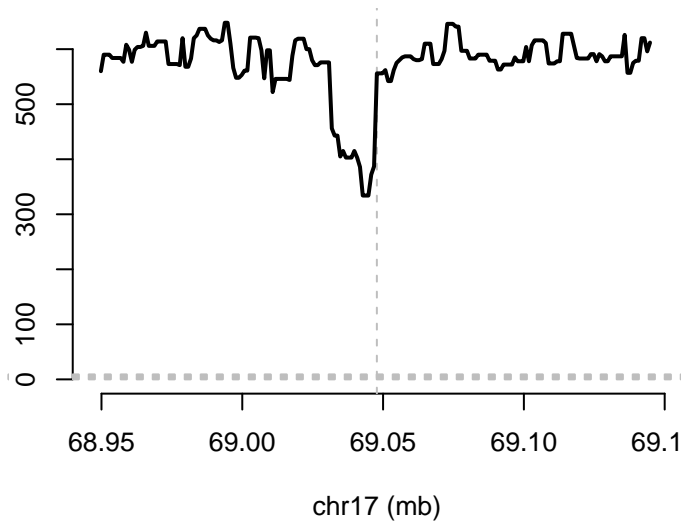

K562 chr17:69,031,850::chr17:69,047,797+-

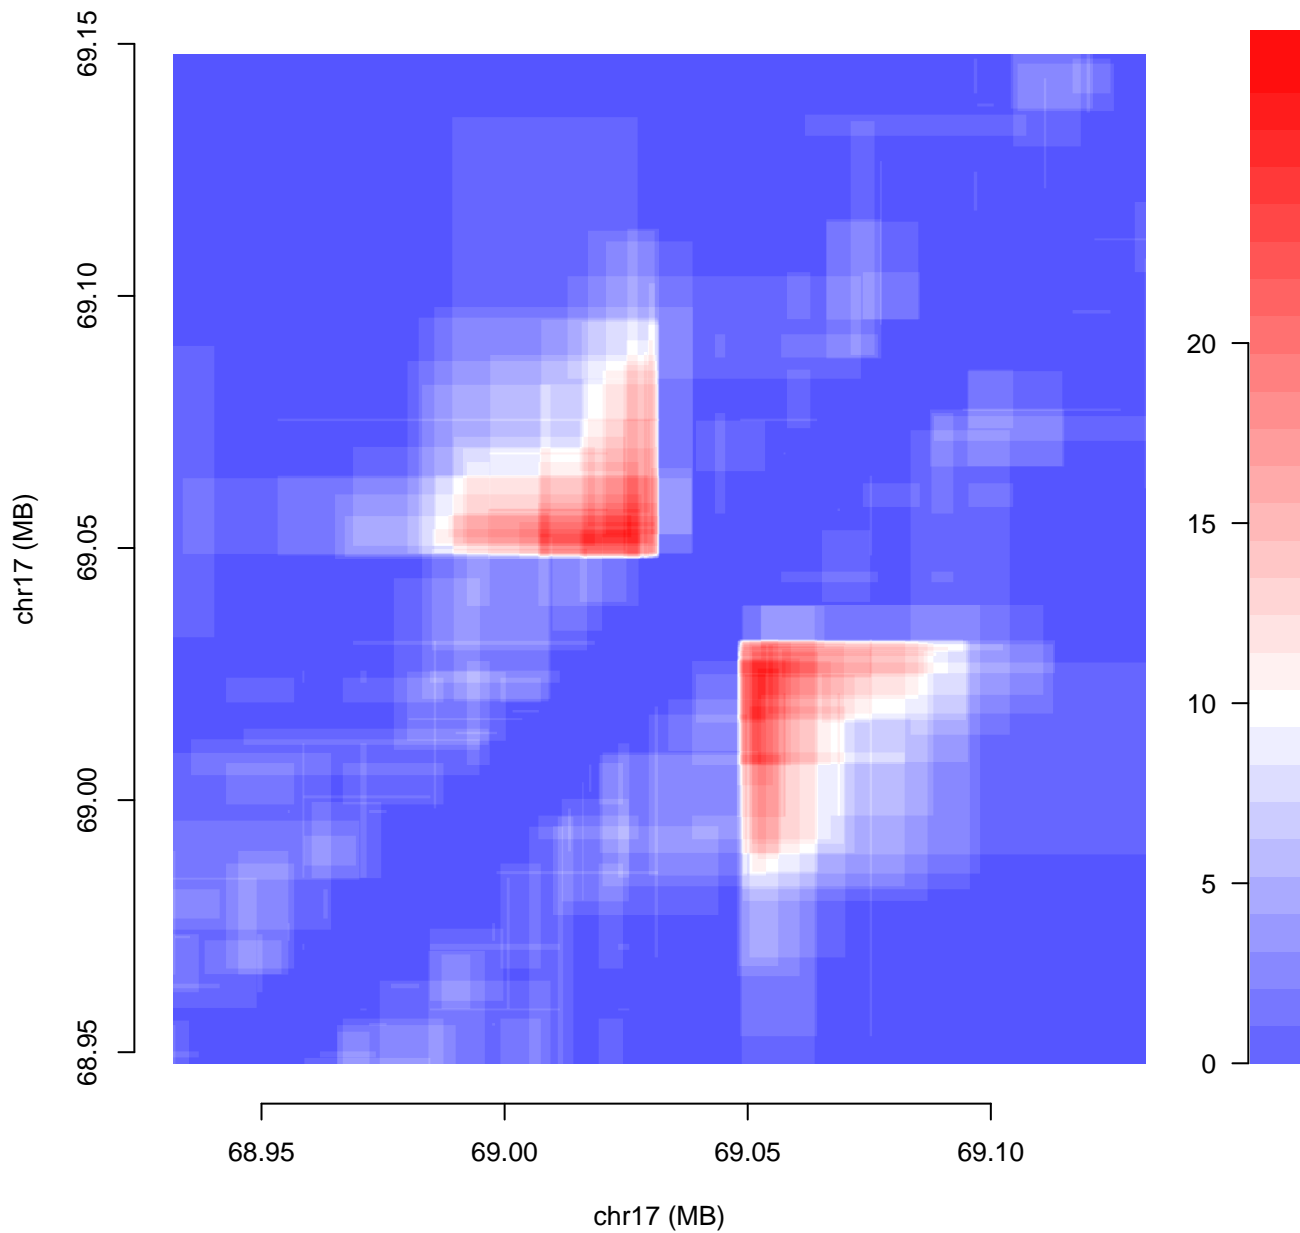

Supplement: Supplemental_Data.zip [file event_62.pdf › event_62.pdf]

Barcode

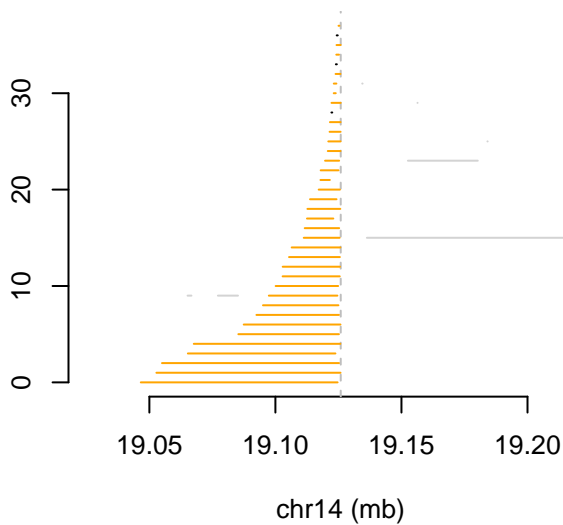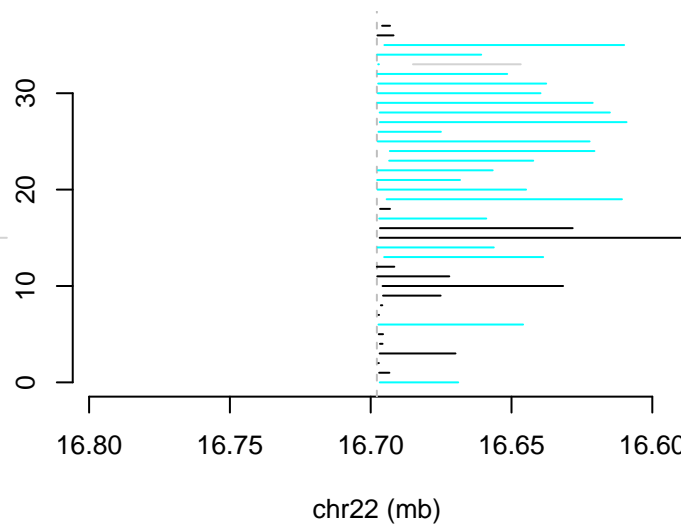

Copy number

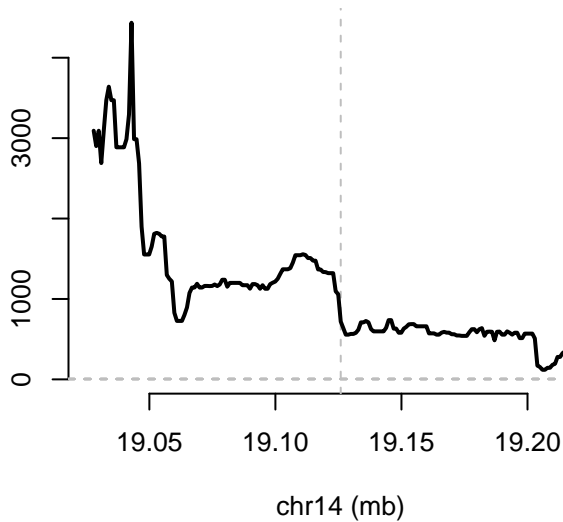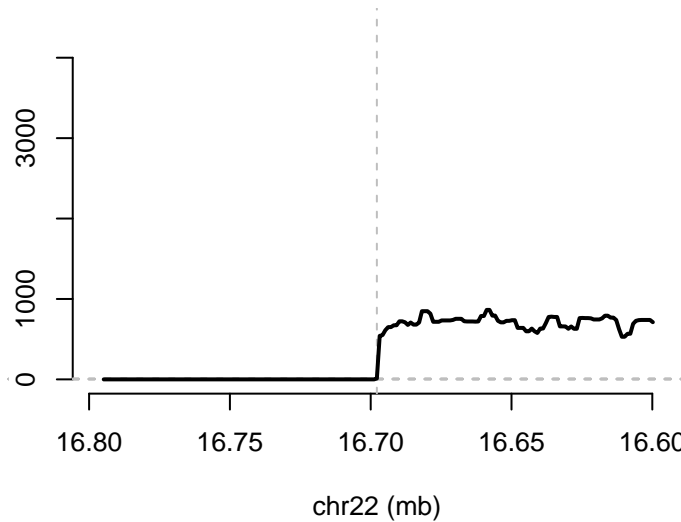

K562 chr14:19,125,916::chr22:16,697,806++

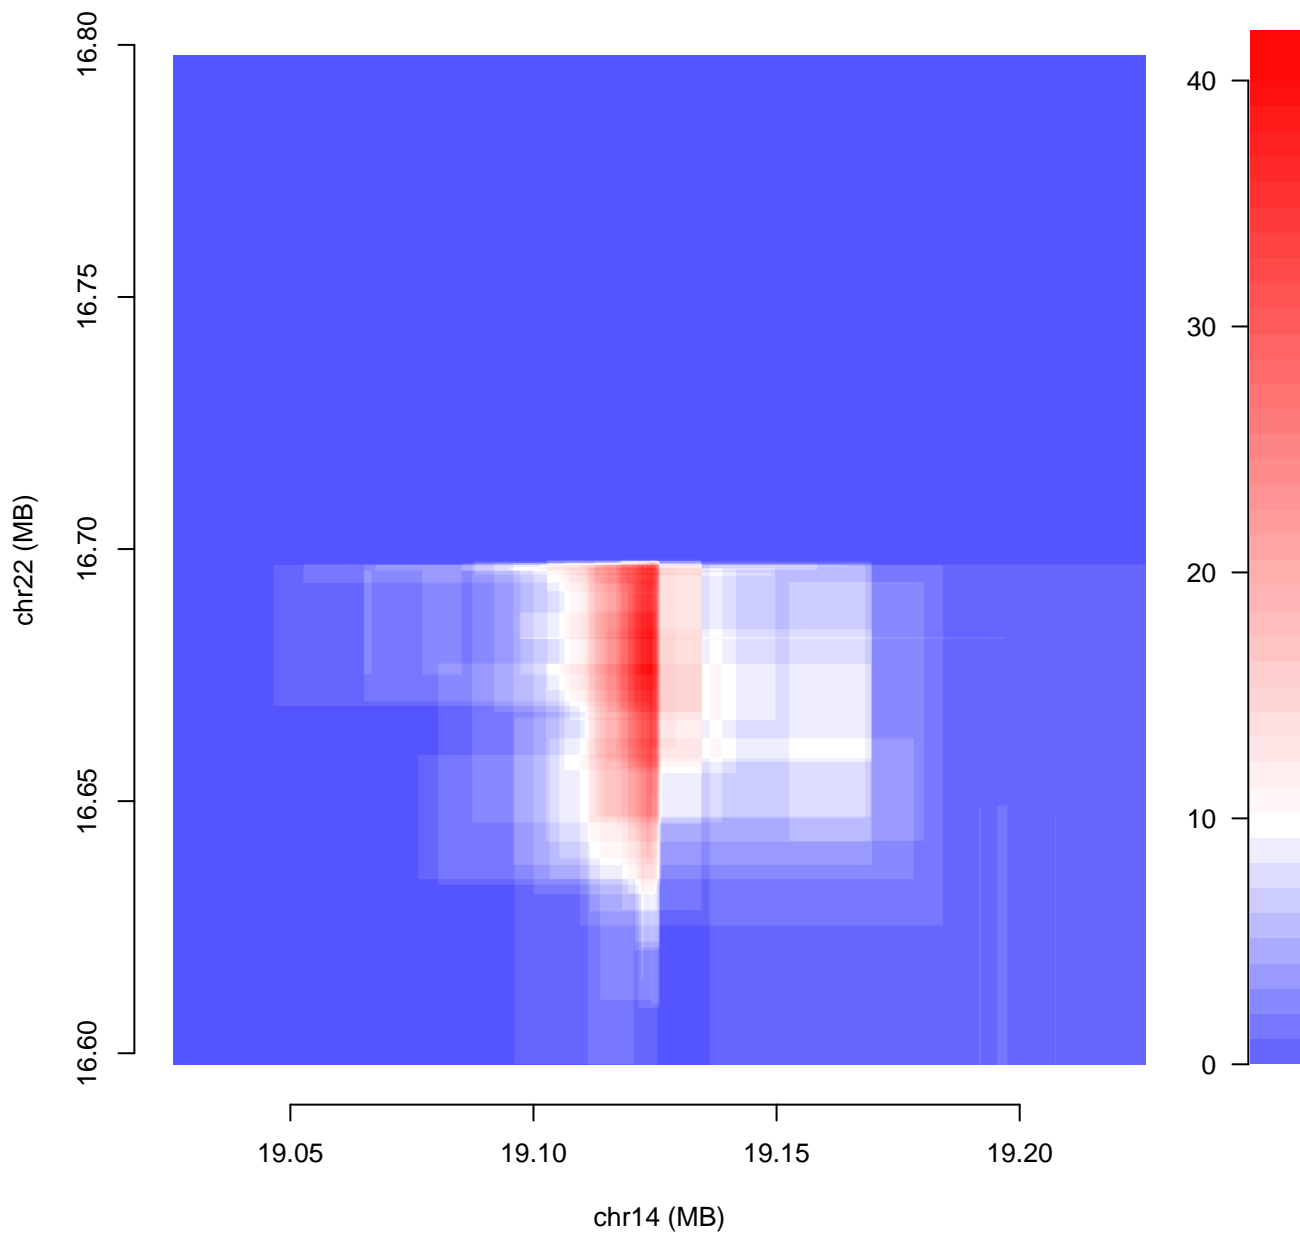

Supplement: Supplemental_Data.zip [file event_63.pdf › event_63.pdf]

Barcode

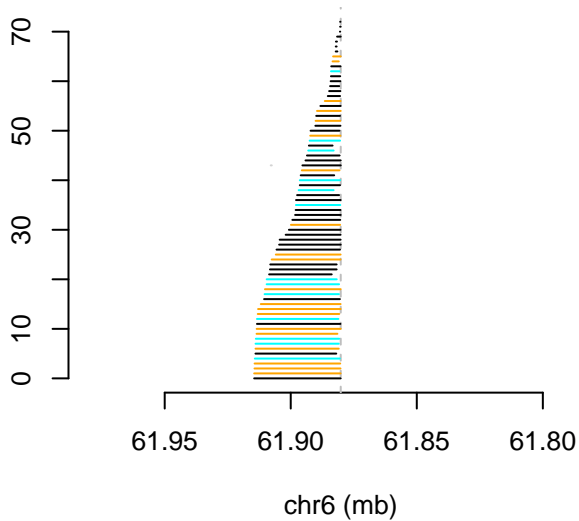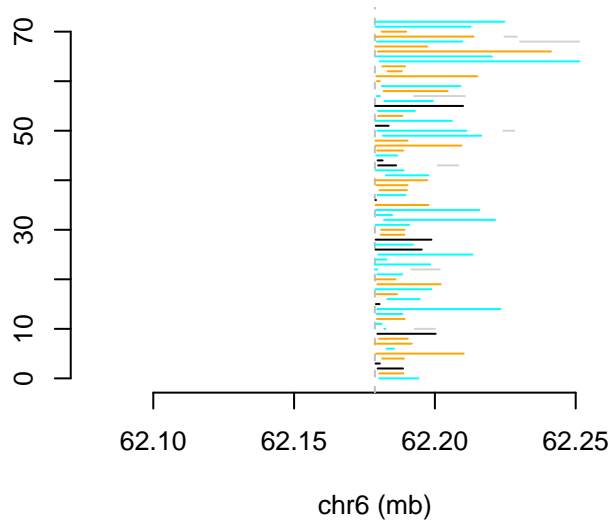

Copy number

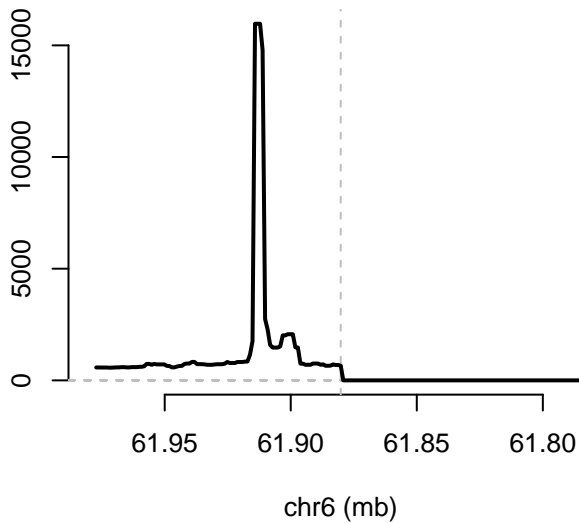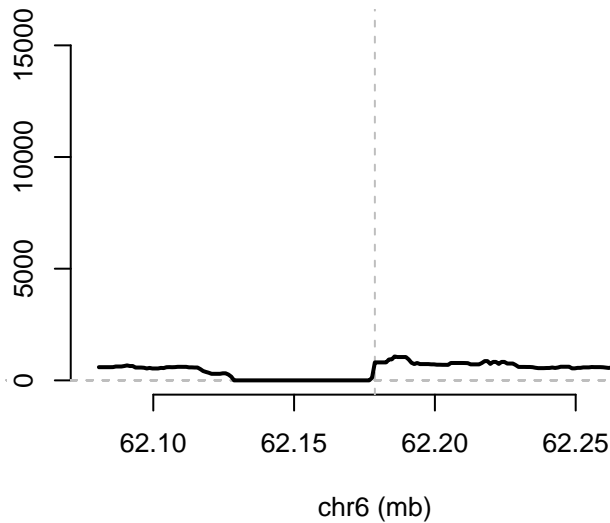

K562 chr6:61,880,164::chr6:62,178,686--

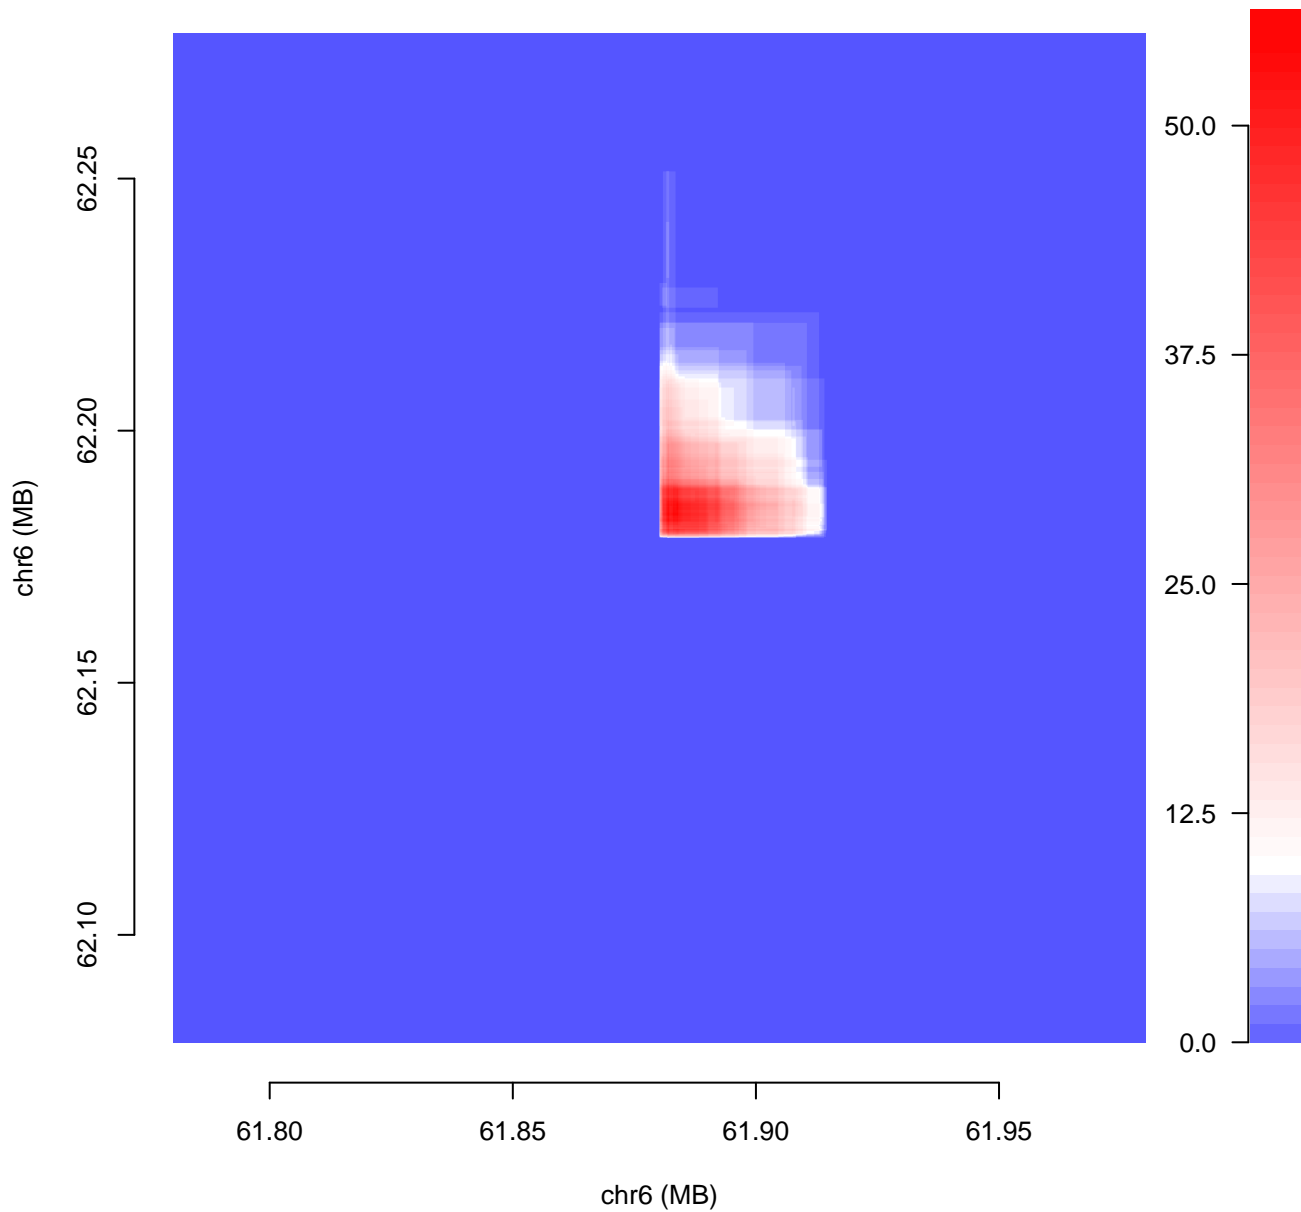

Supplement: Supplemental_Data.zip [file event_64.pdf › event_64.pdf]

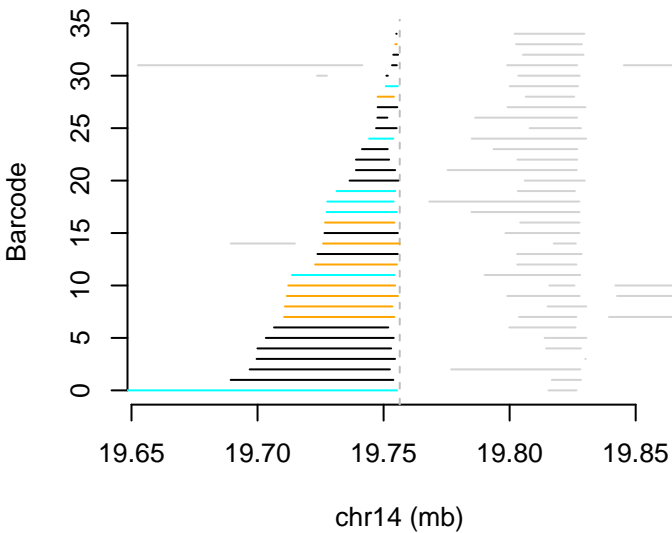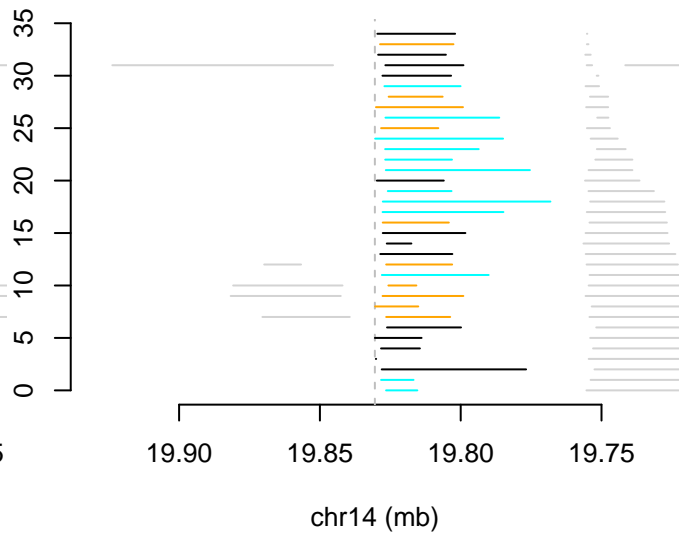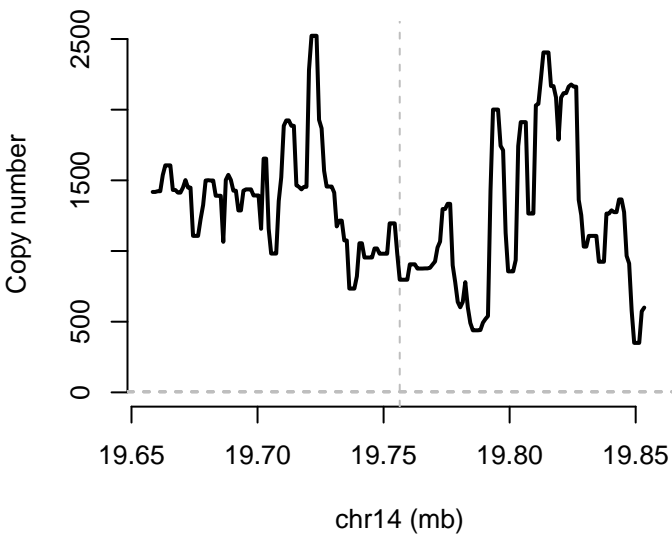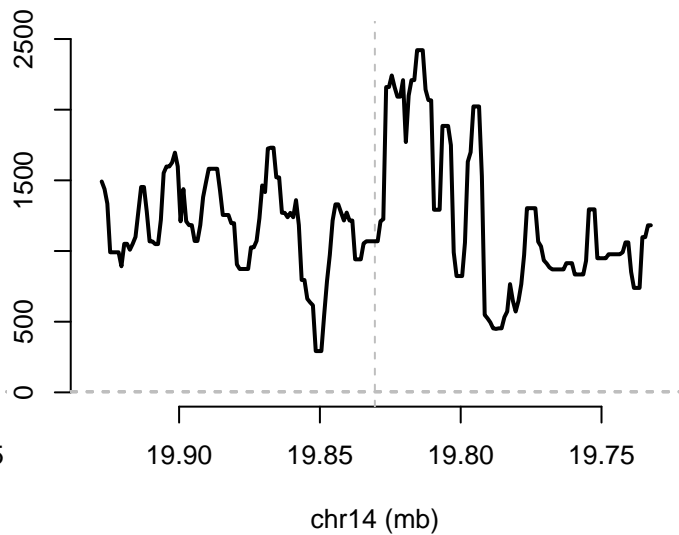

K562 chr14:19,756,409::chr14:19,830,483++

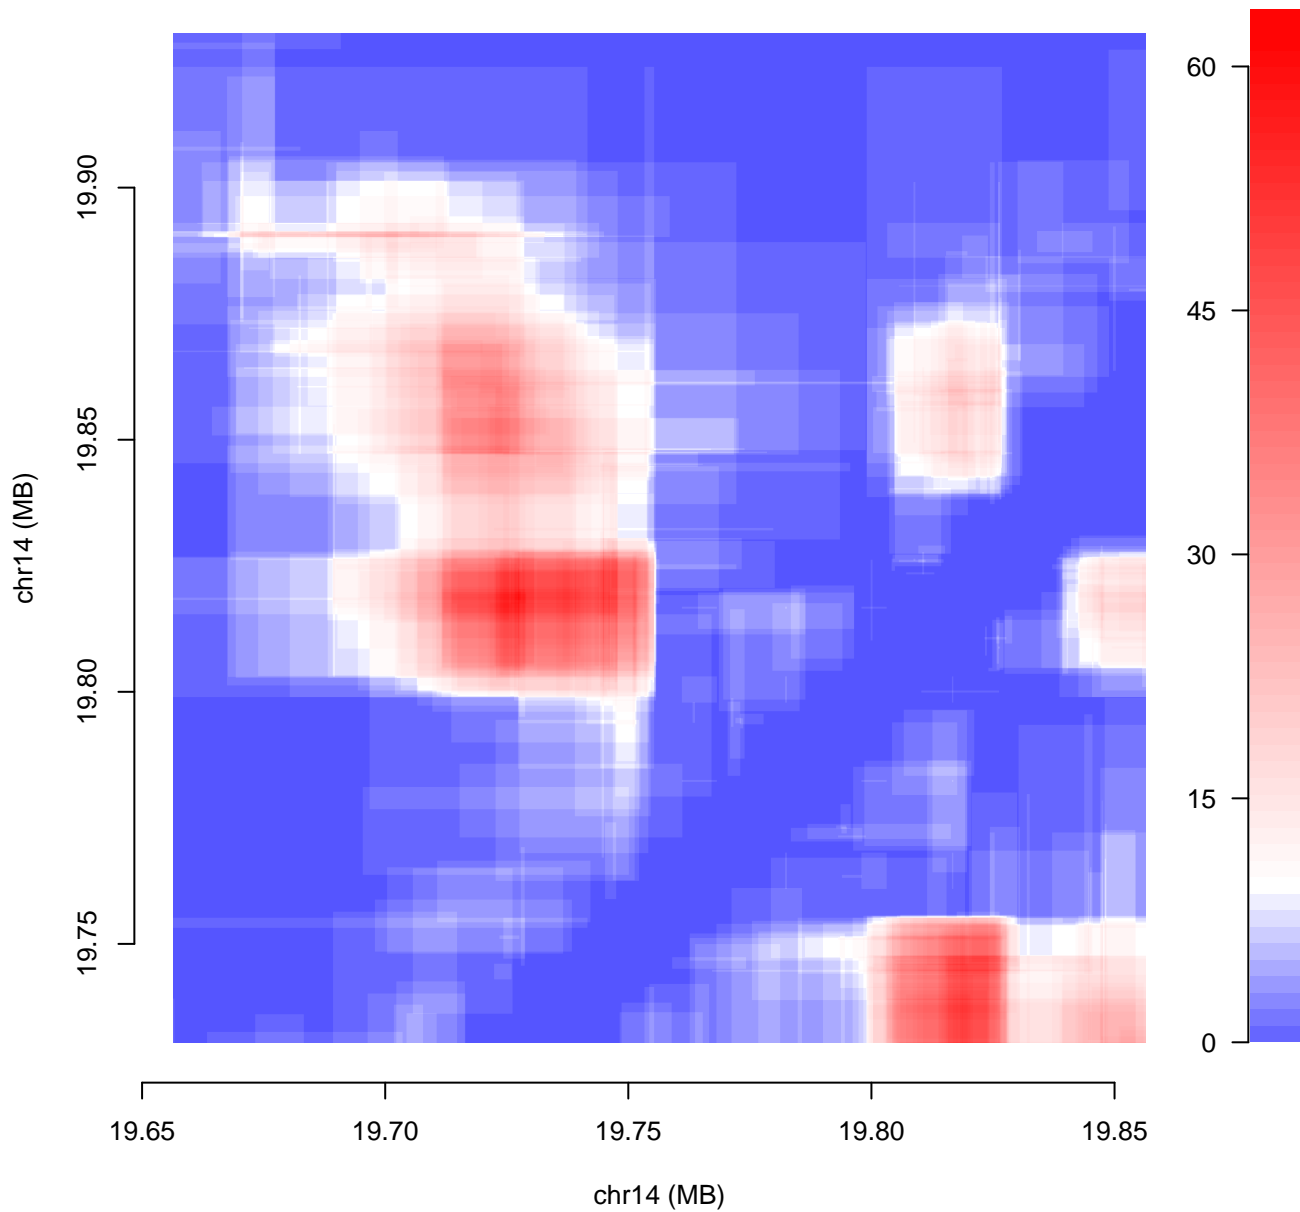

Supplement: Supplemental_Data.zip [file event_65.pdf › event_65.pdf]

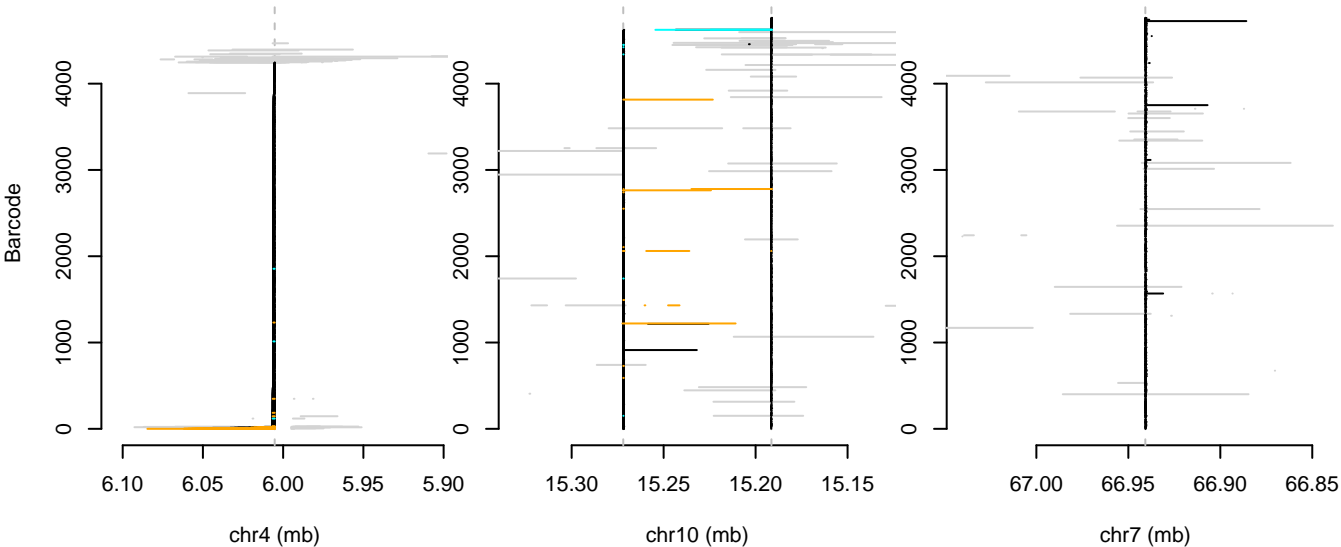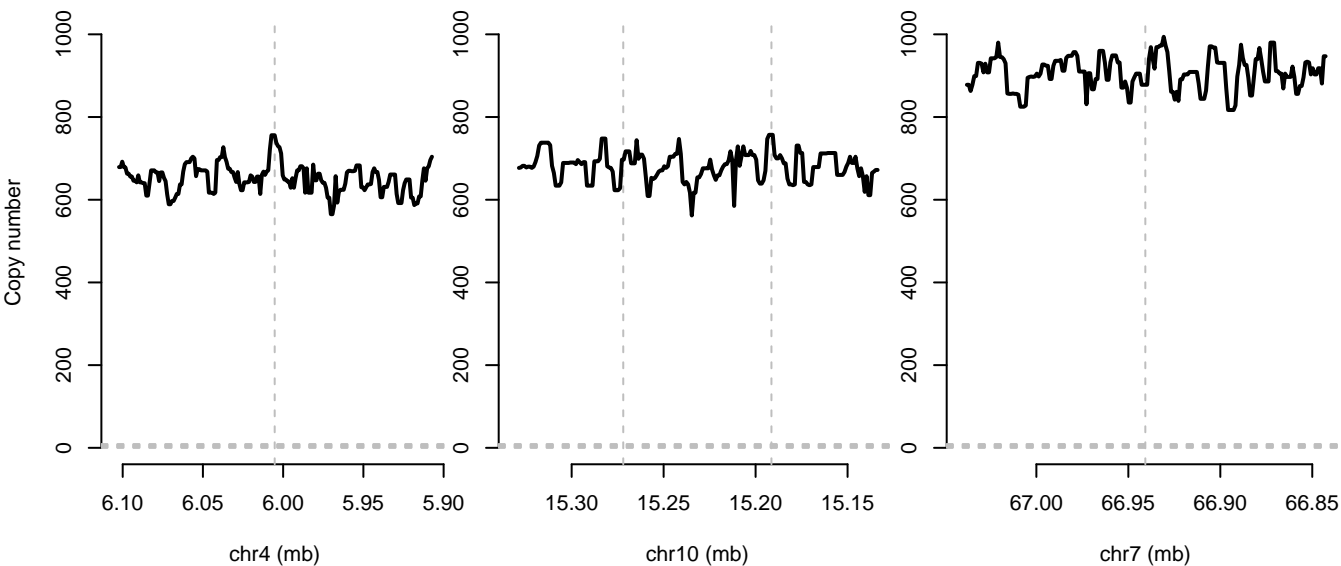

K562 chr7:66,940,755::chr10:15,191,393+-

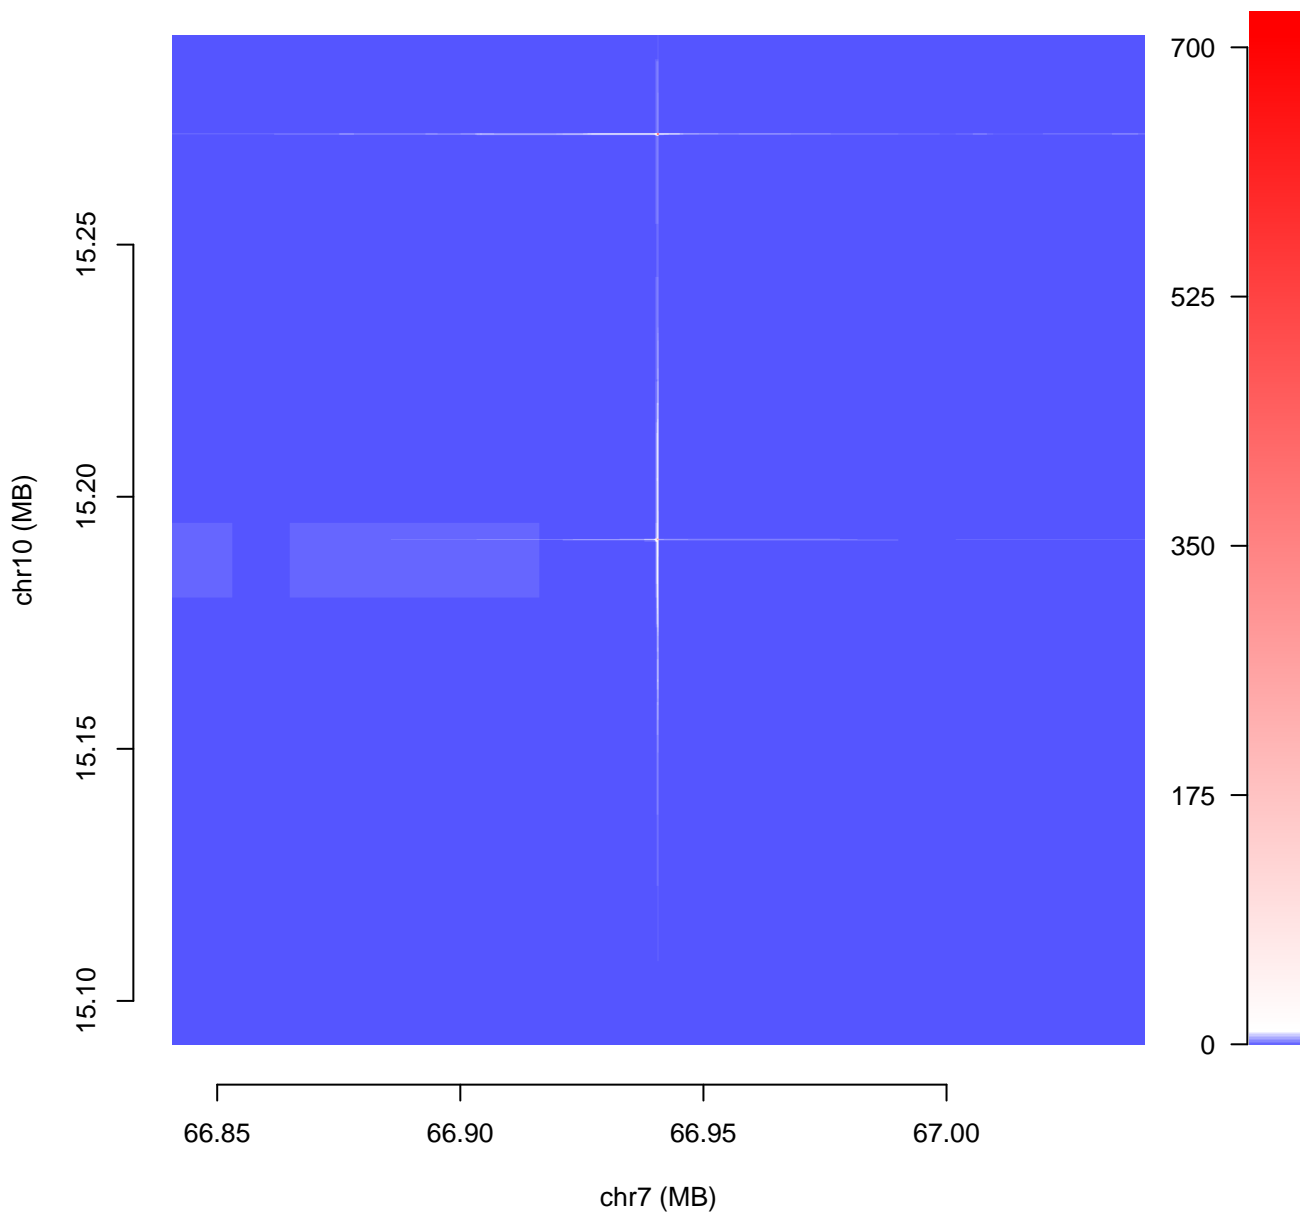

K562 chr4:6,005,277::chr10:15,271,956-+

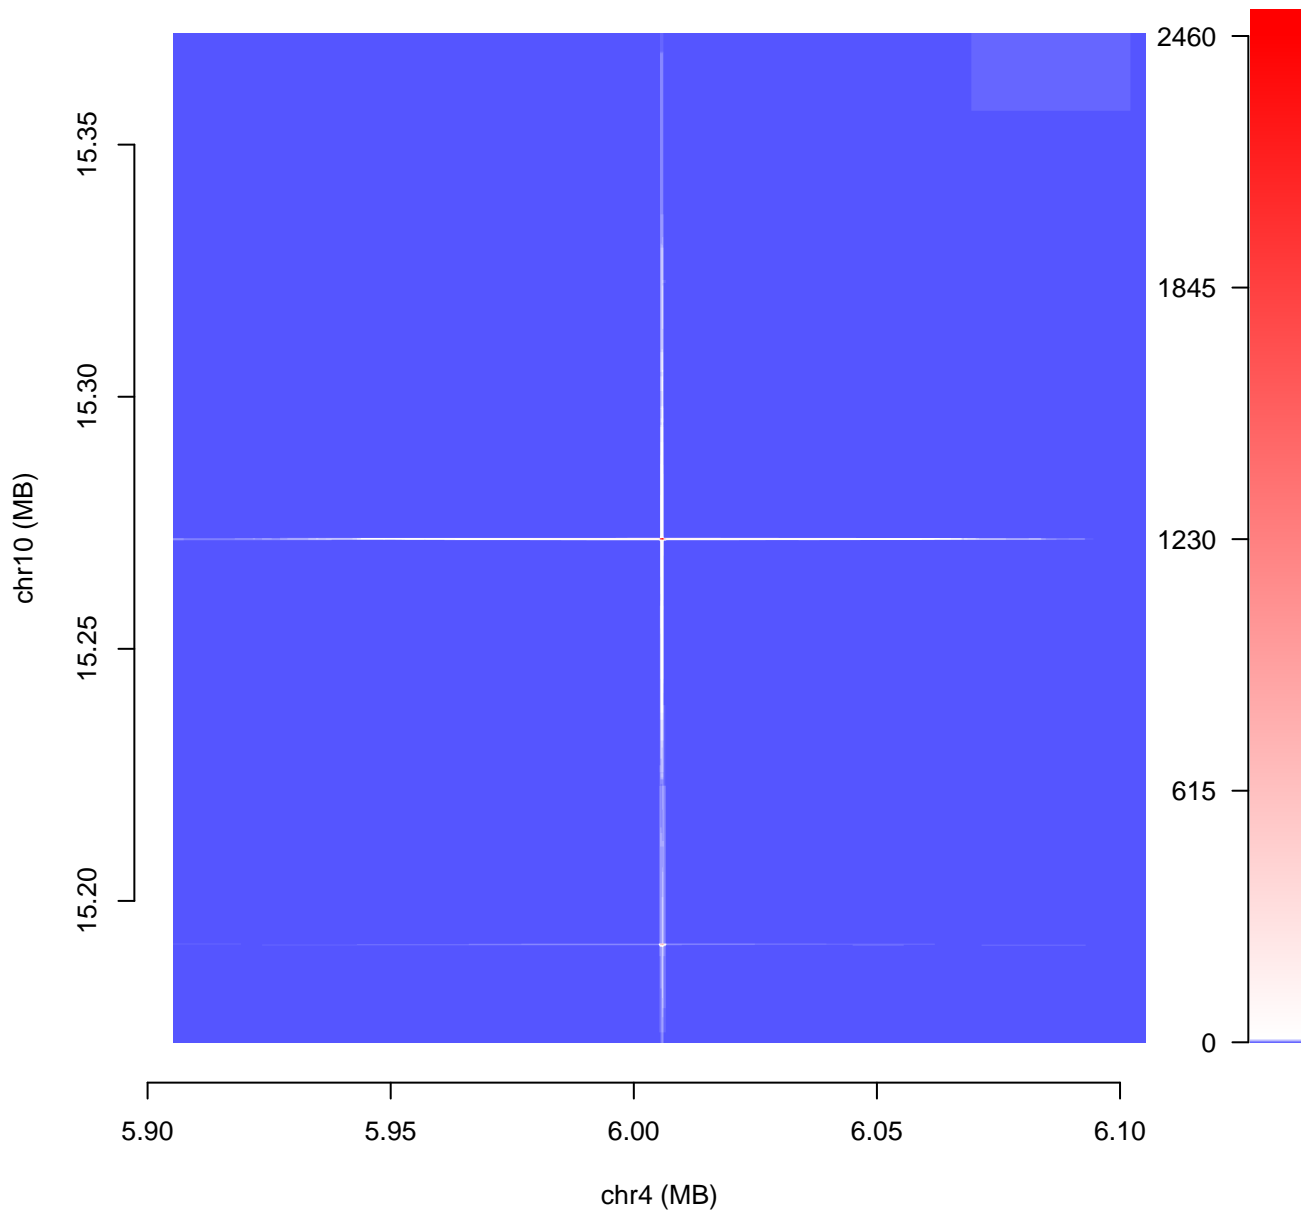

K562 chr10:15,271,956::chr10:15,191,393+-

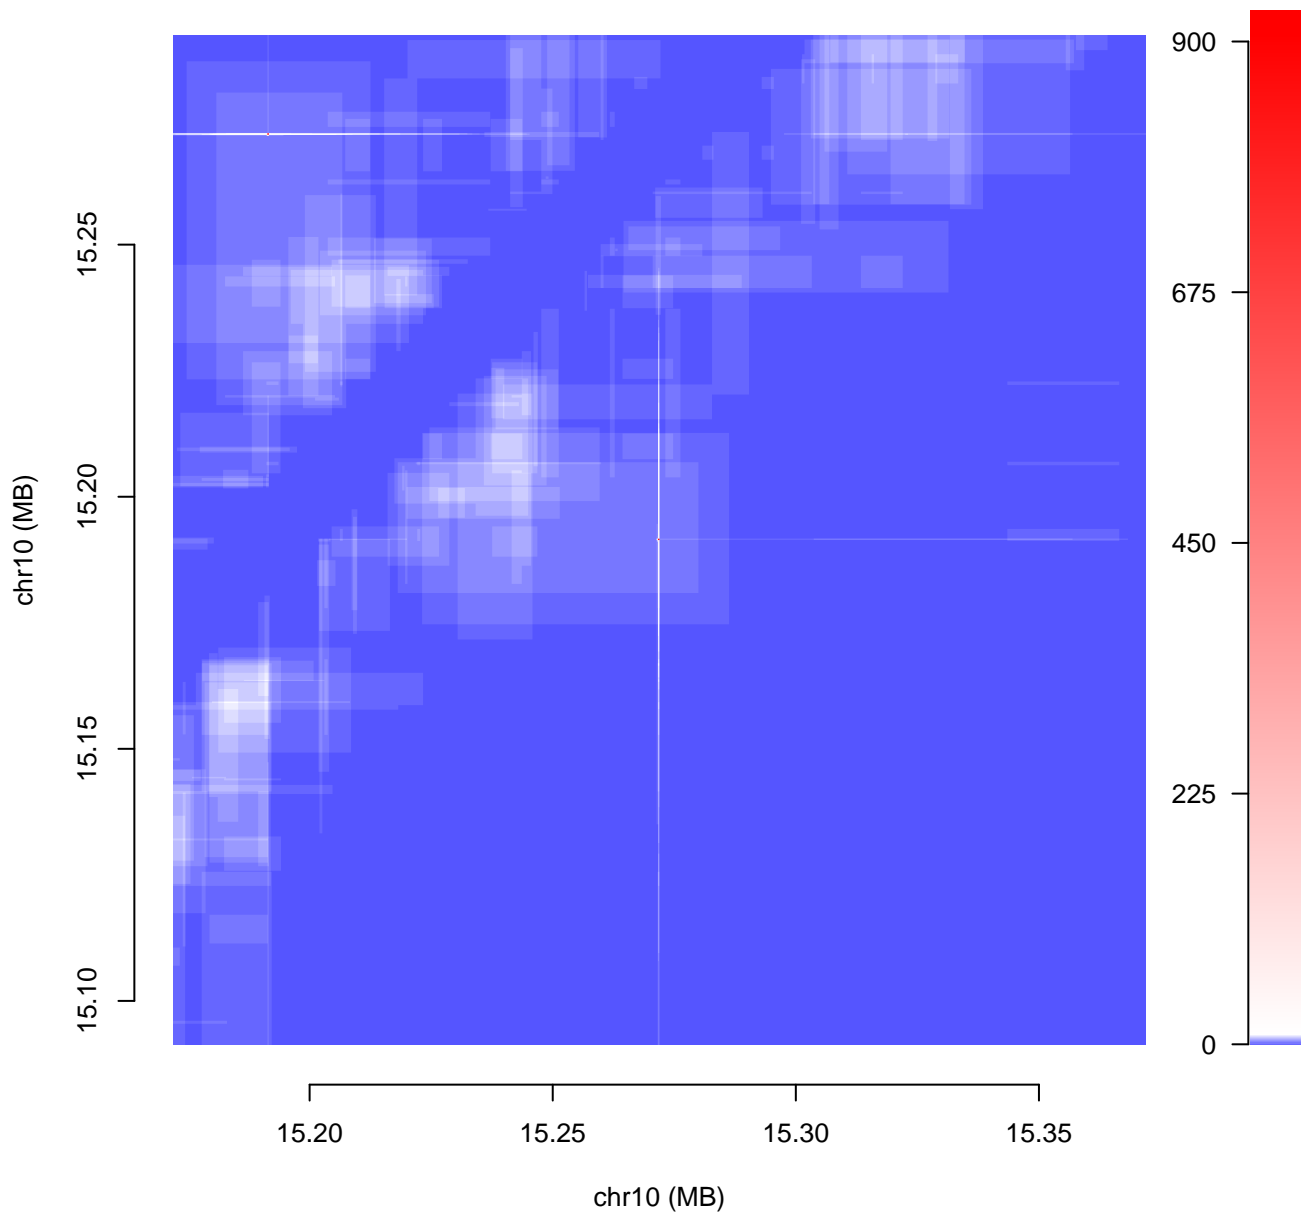

Supplement: Supplemental_Data.zip [file event_66.pdf › event_66.pdf]

Barcode

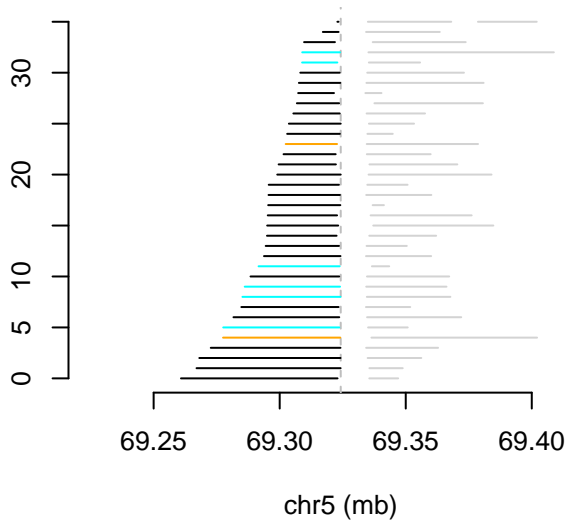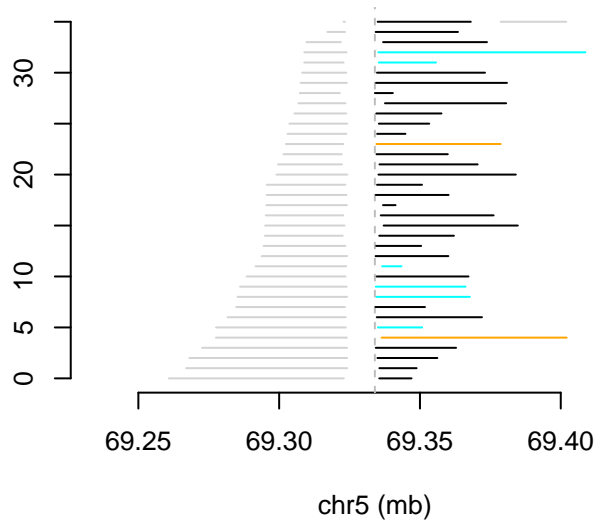

Copy number

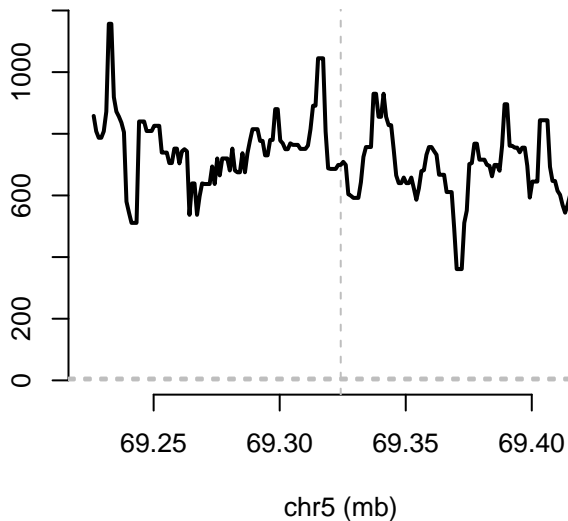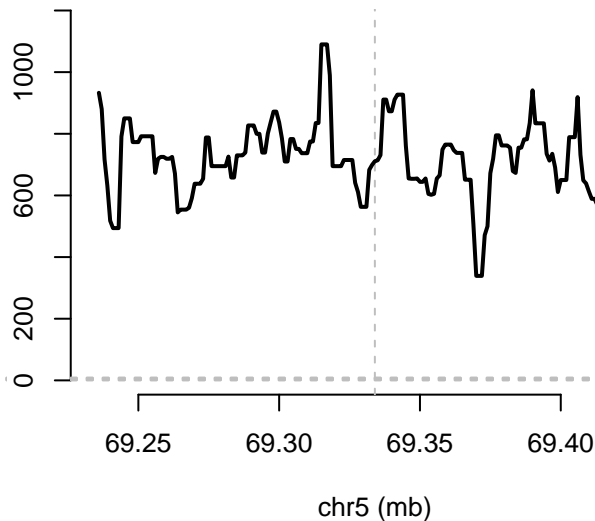

K562 chr5:69,324,219::chr5:69,333,988+-

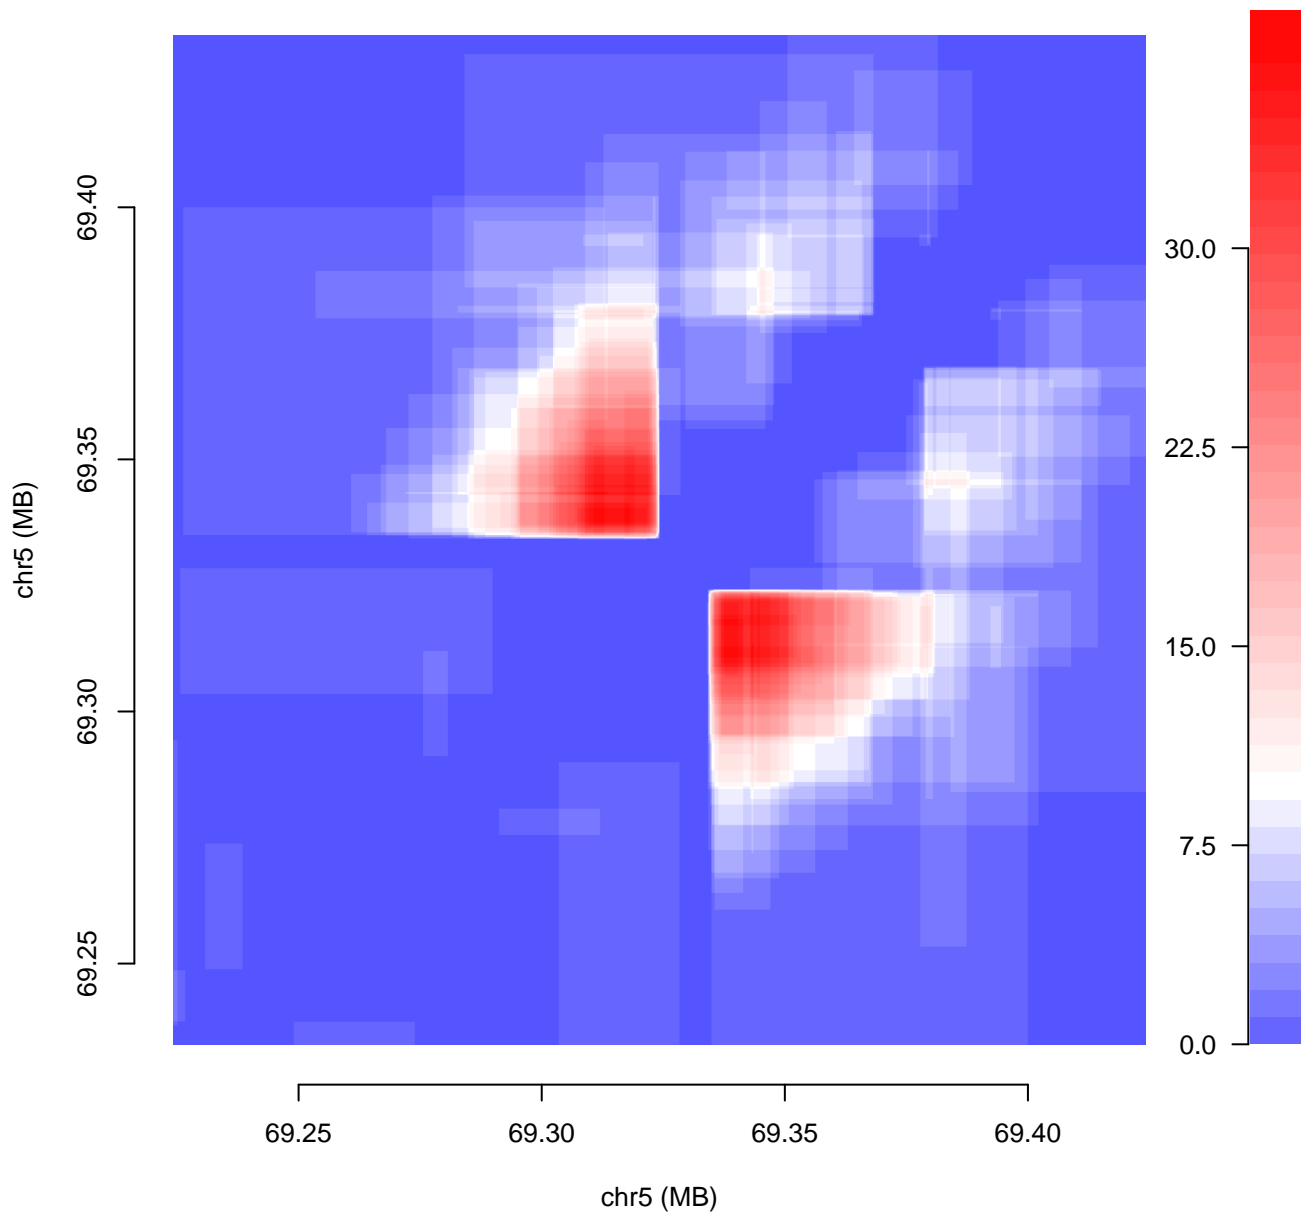

Supplement: Supplemental_Data.zip [file event_67.pdf › event_67.pdf]

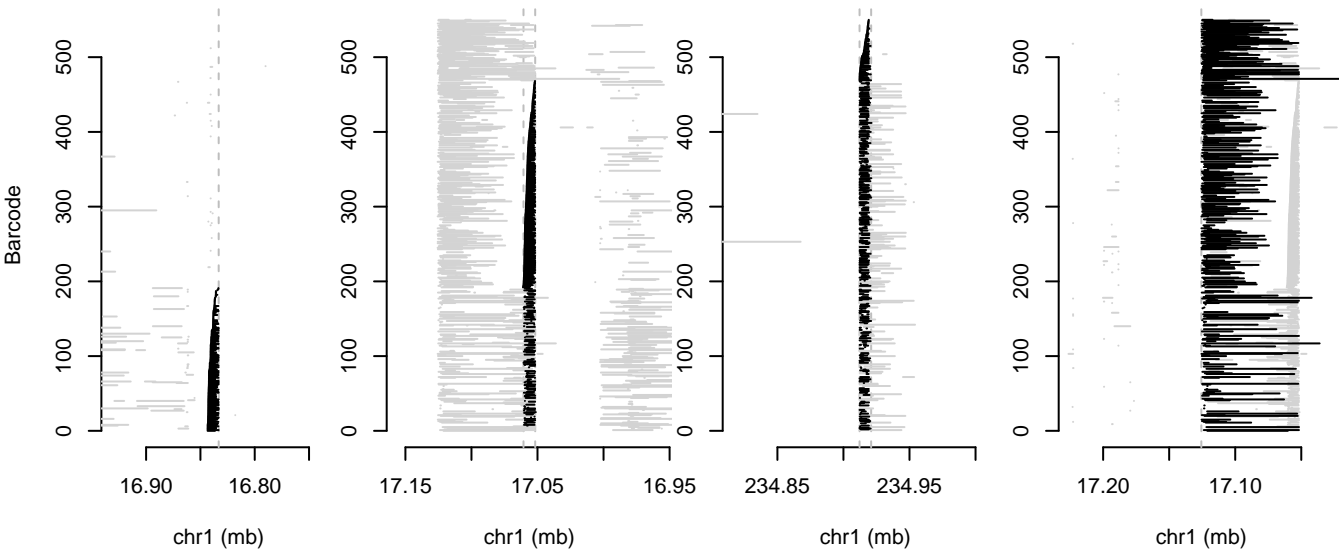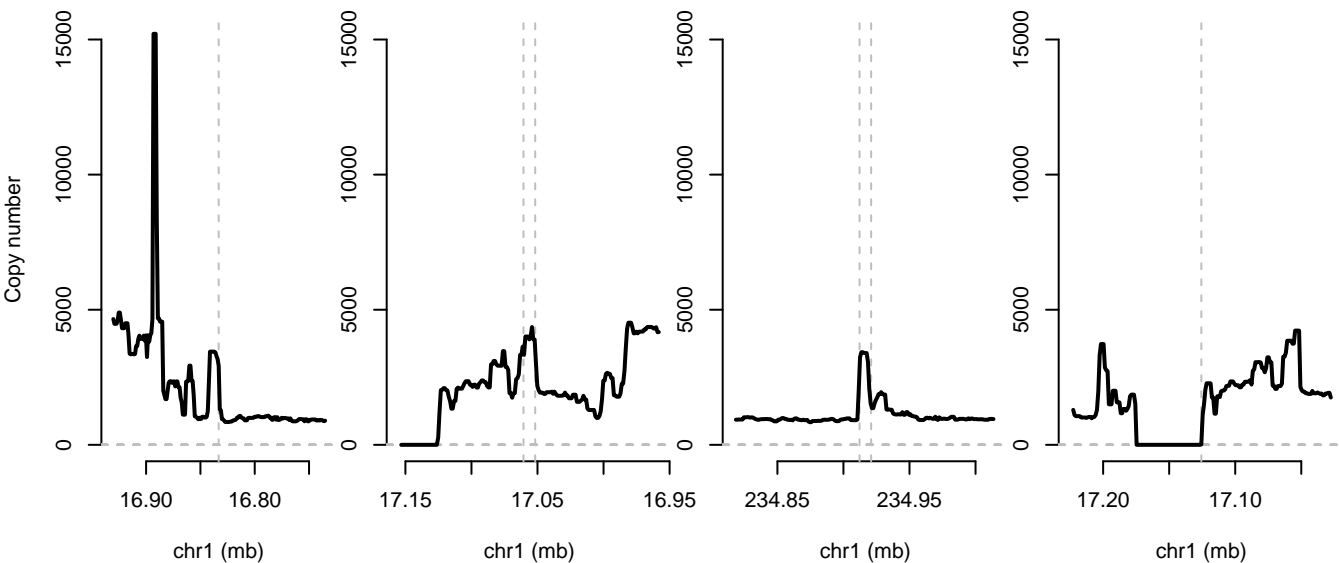

K562 chr1:17,051,739::chr1:17,060,610-+

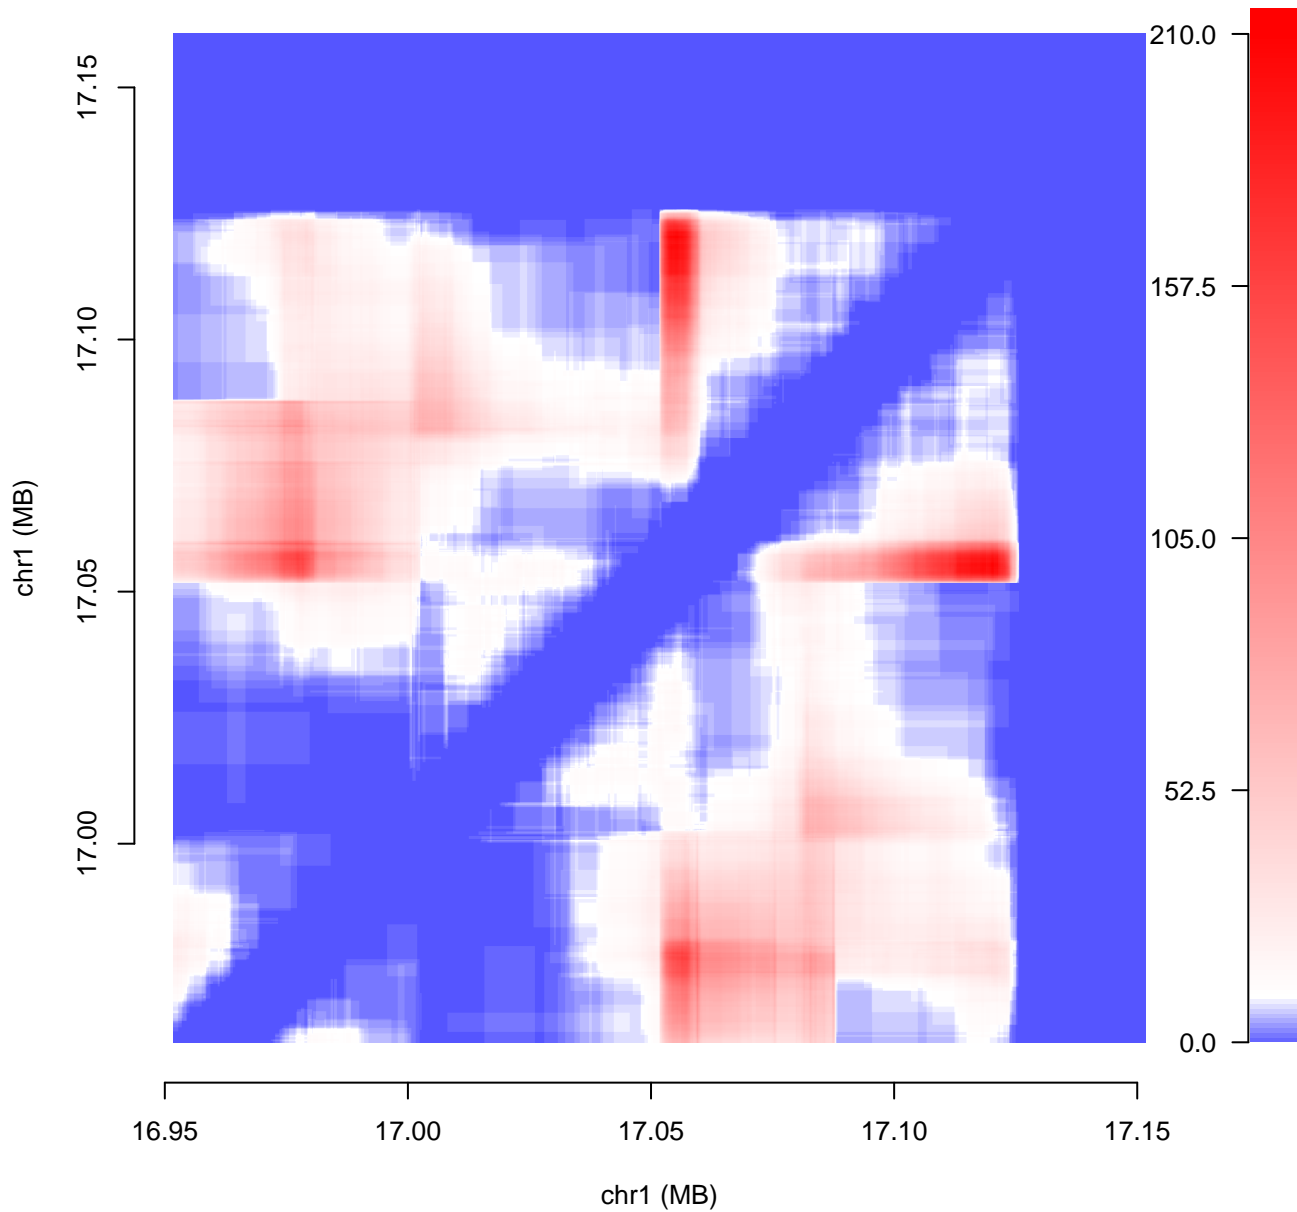

K562 chr1:17,051,739::chr1:234,912,187--

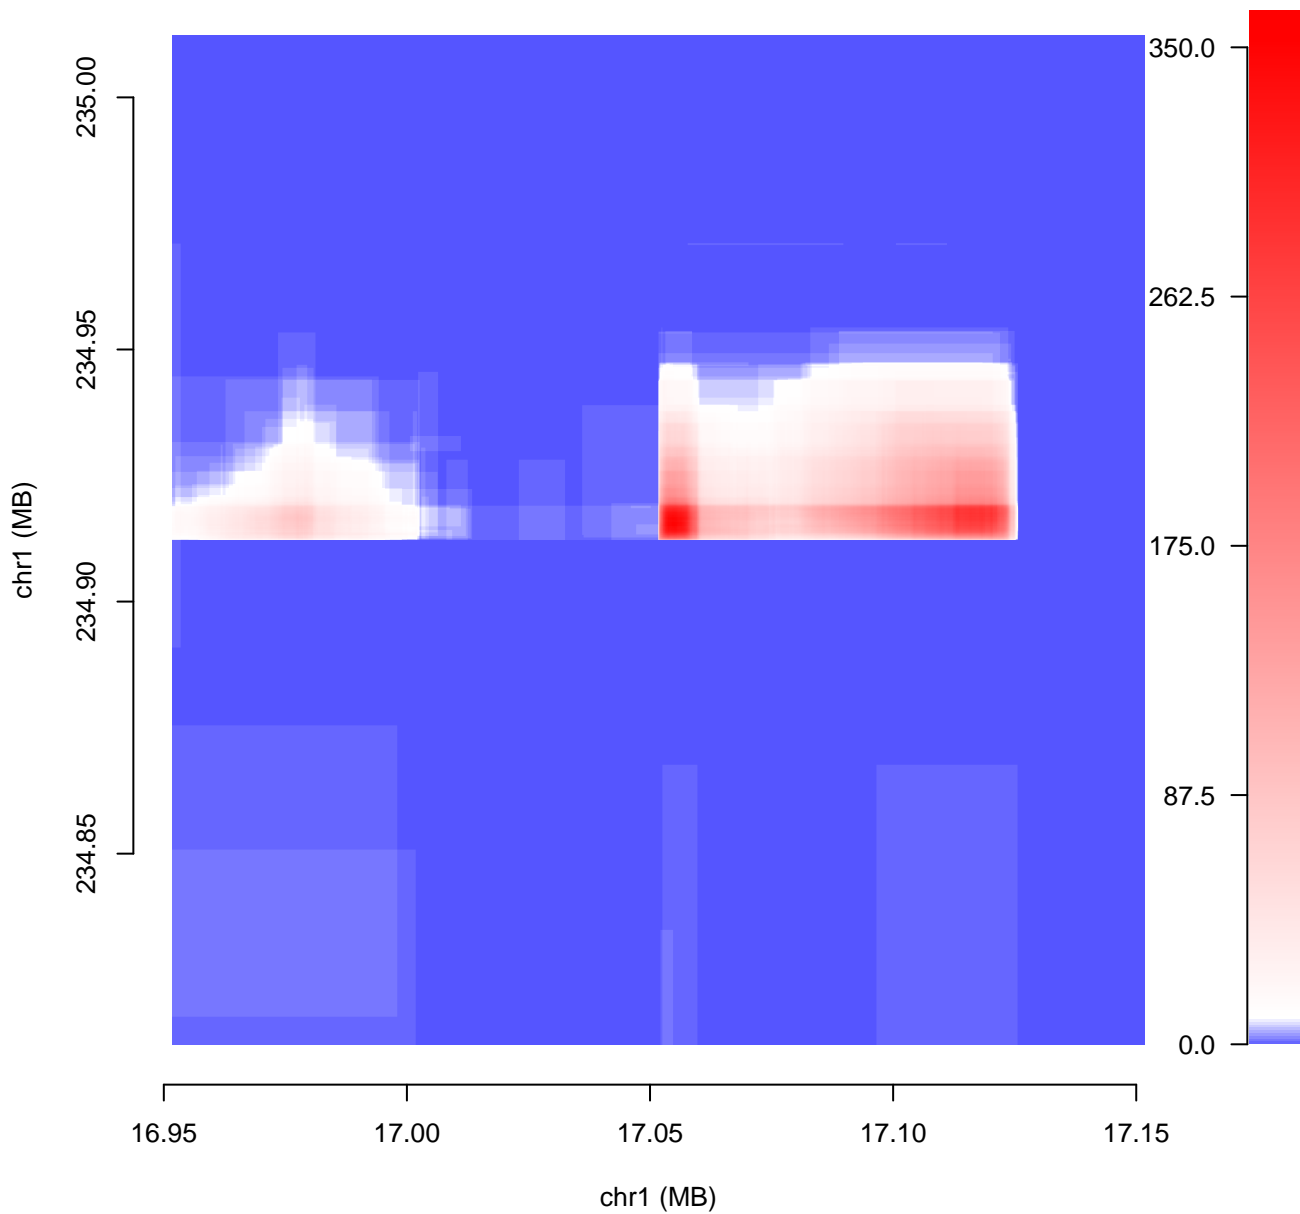

K562 chr1:16,833,181::chr1:17,060,610-+

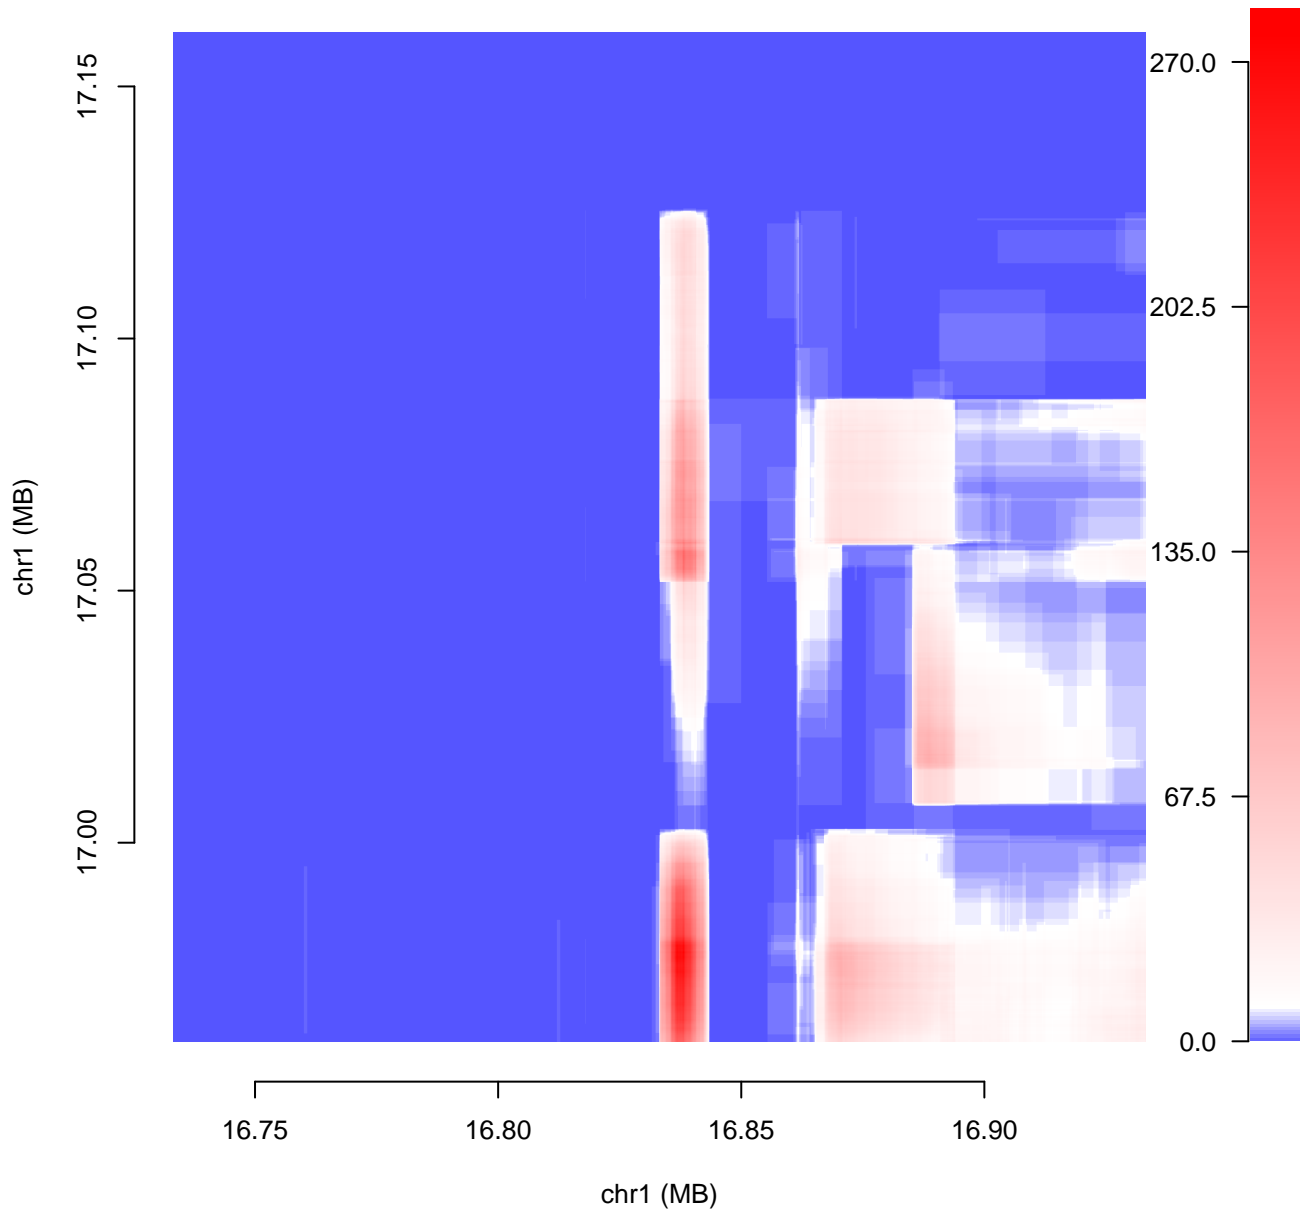

**K562 chr1:17,125,654::chr1:234,920,965++**

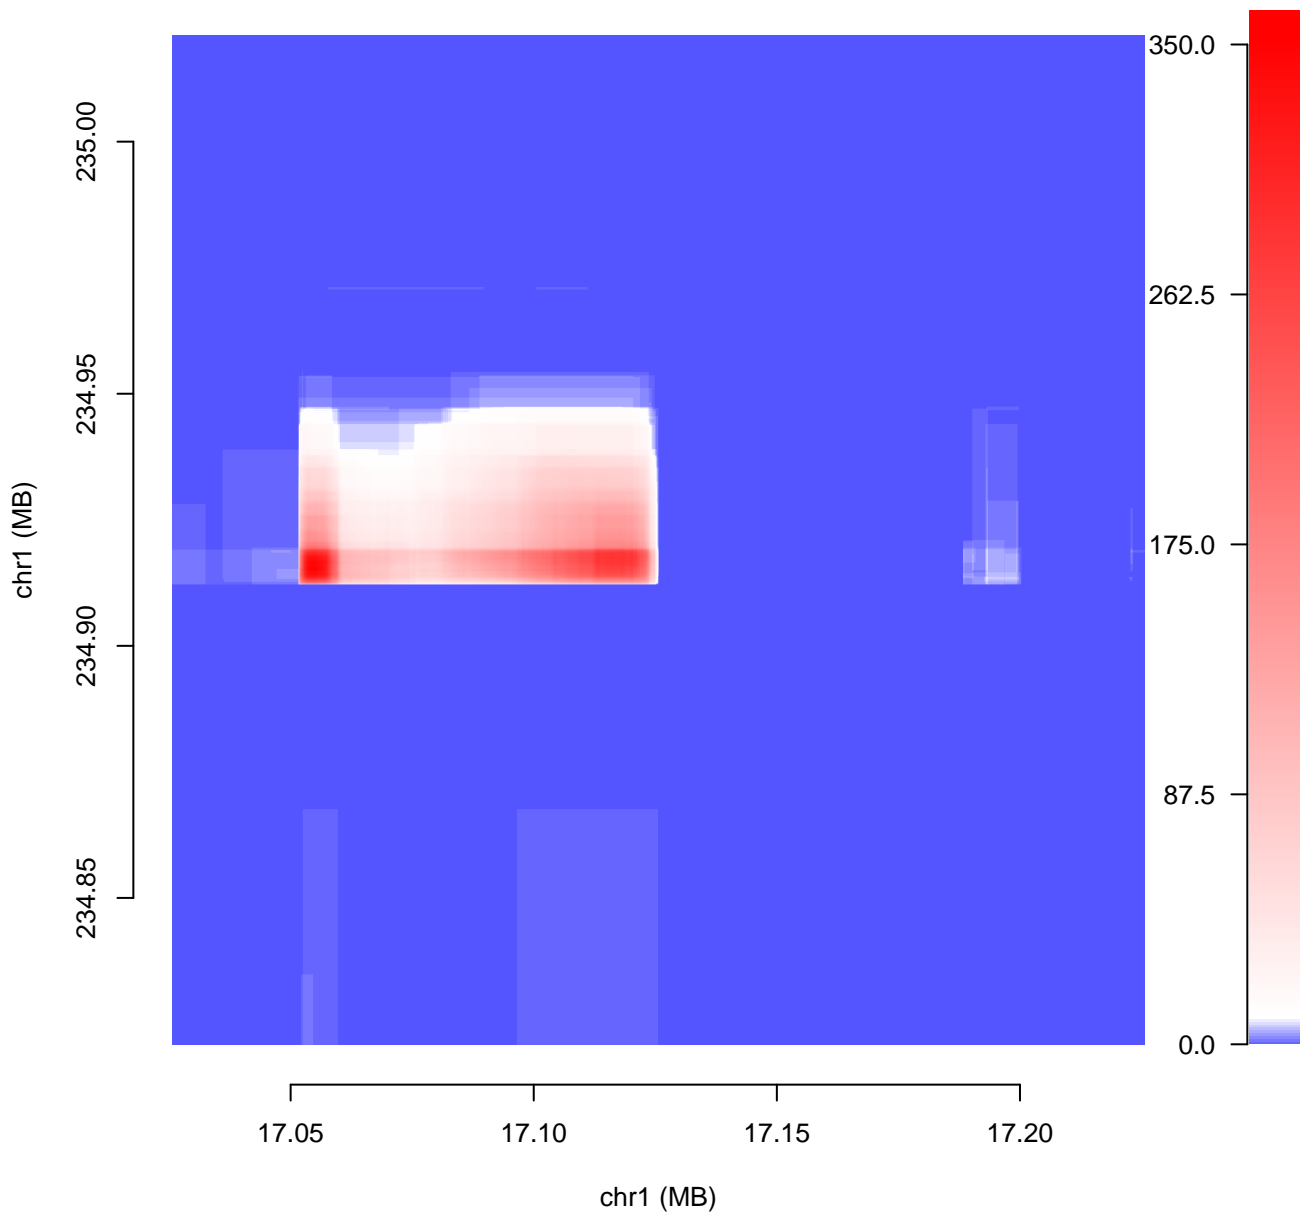

K562 chr1:234,920,965::chr1:234,912,187+-

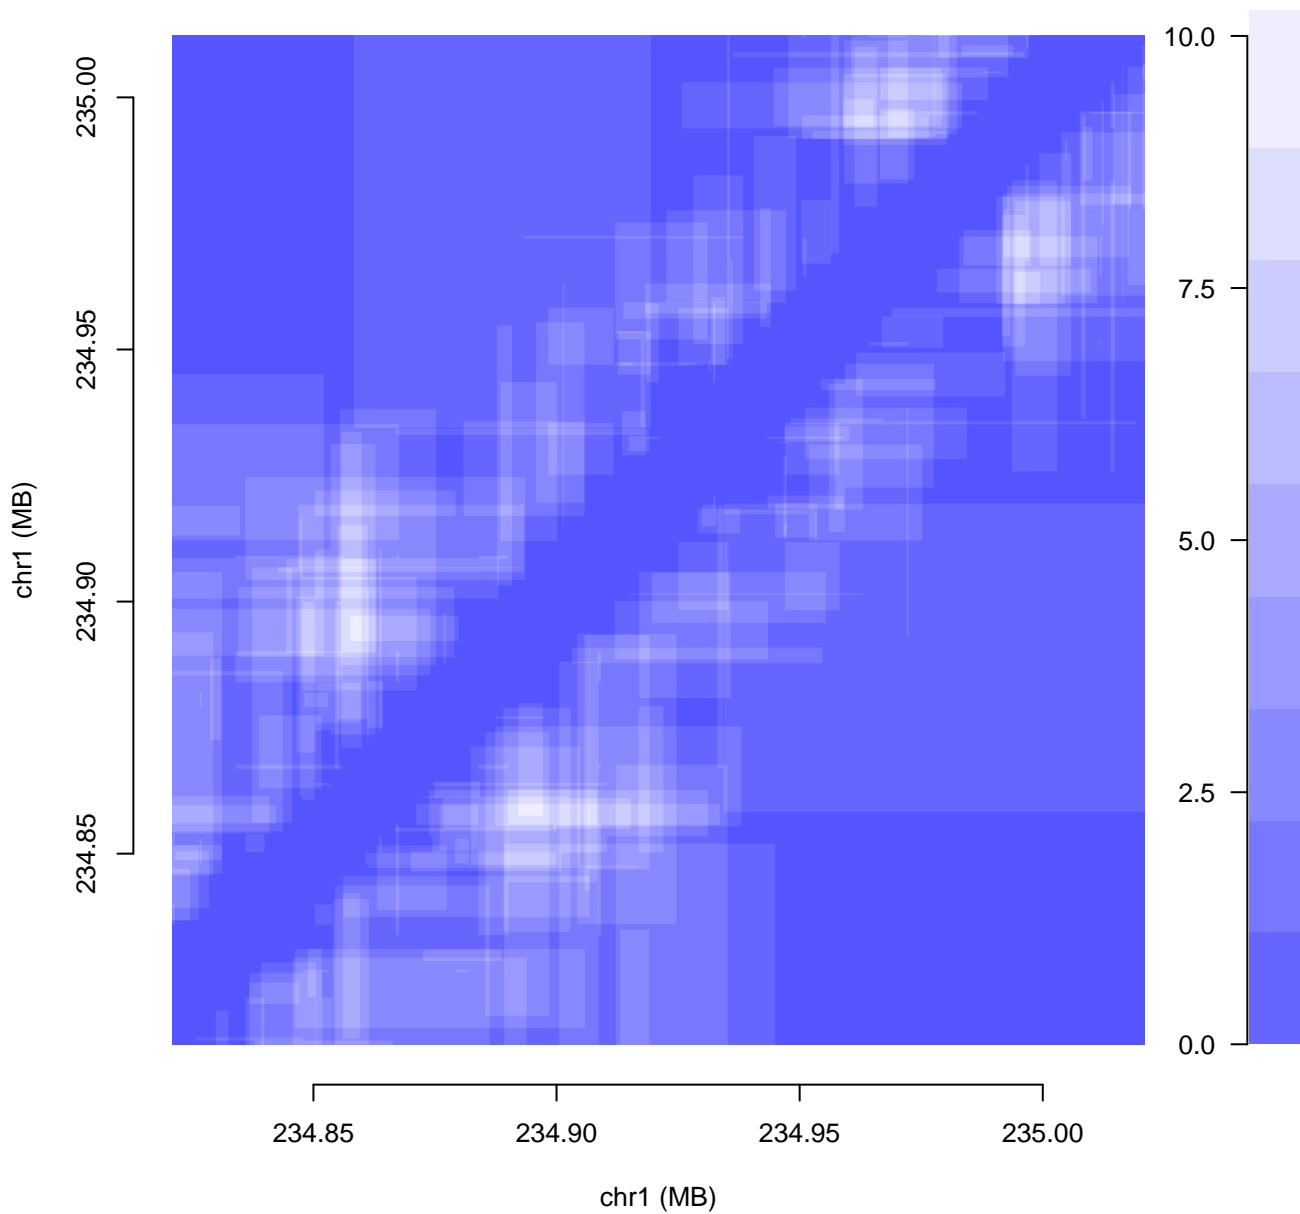

Supplement: Supplemental_Data.zip [file event_68.pdf › event_68.pdf]

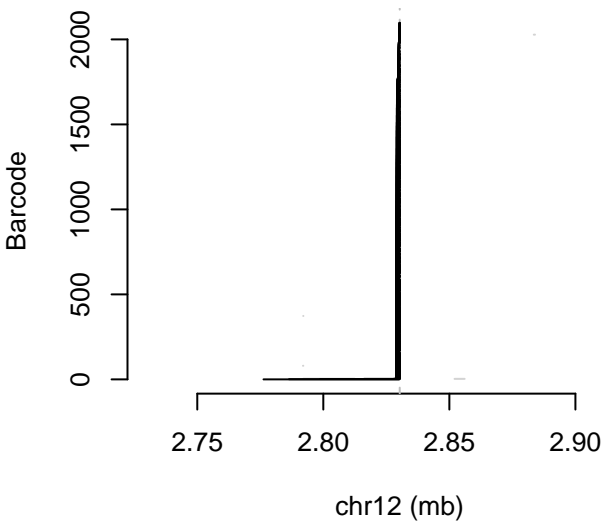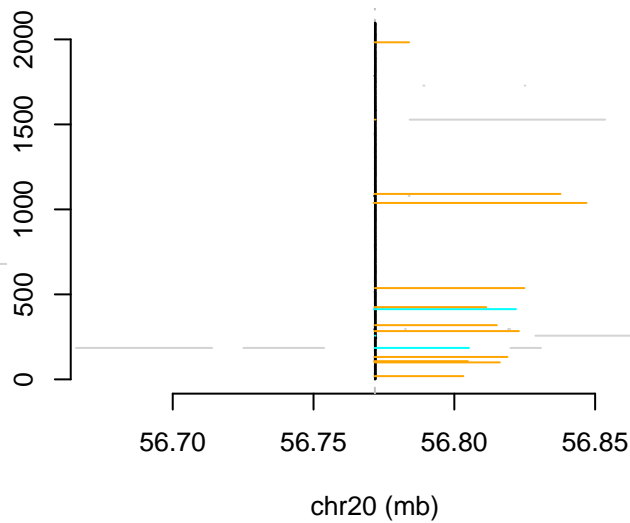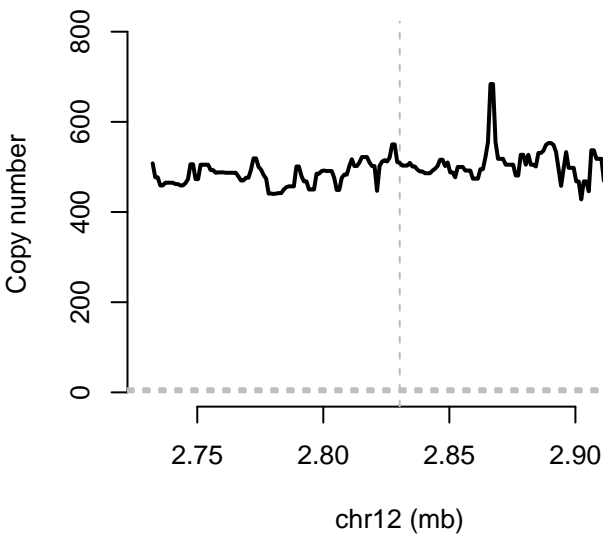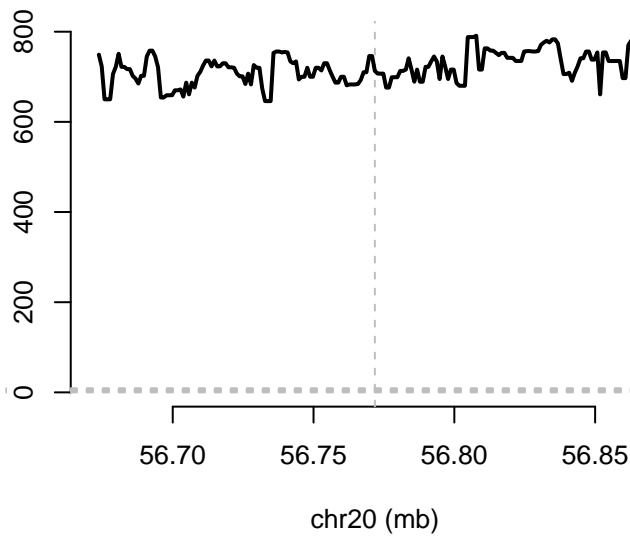

K562 chr20:56,771,783::chr12:2,830,317-+

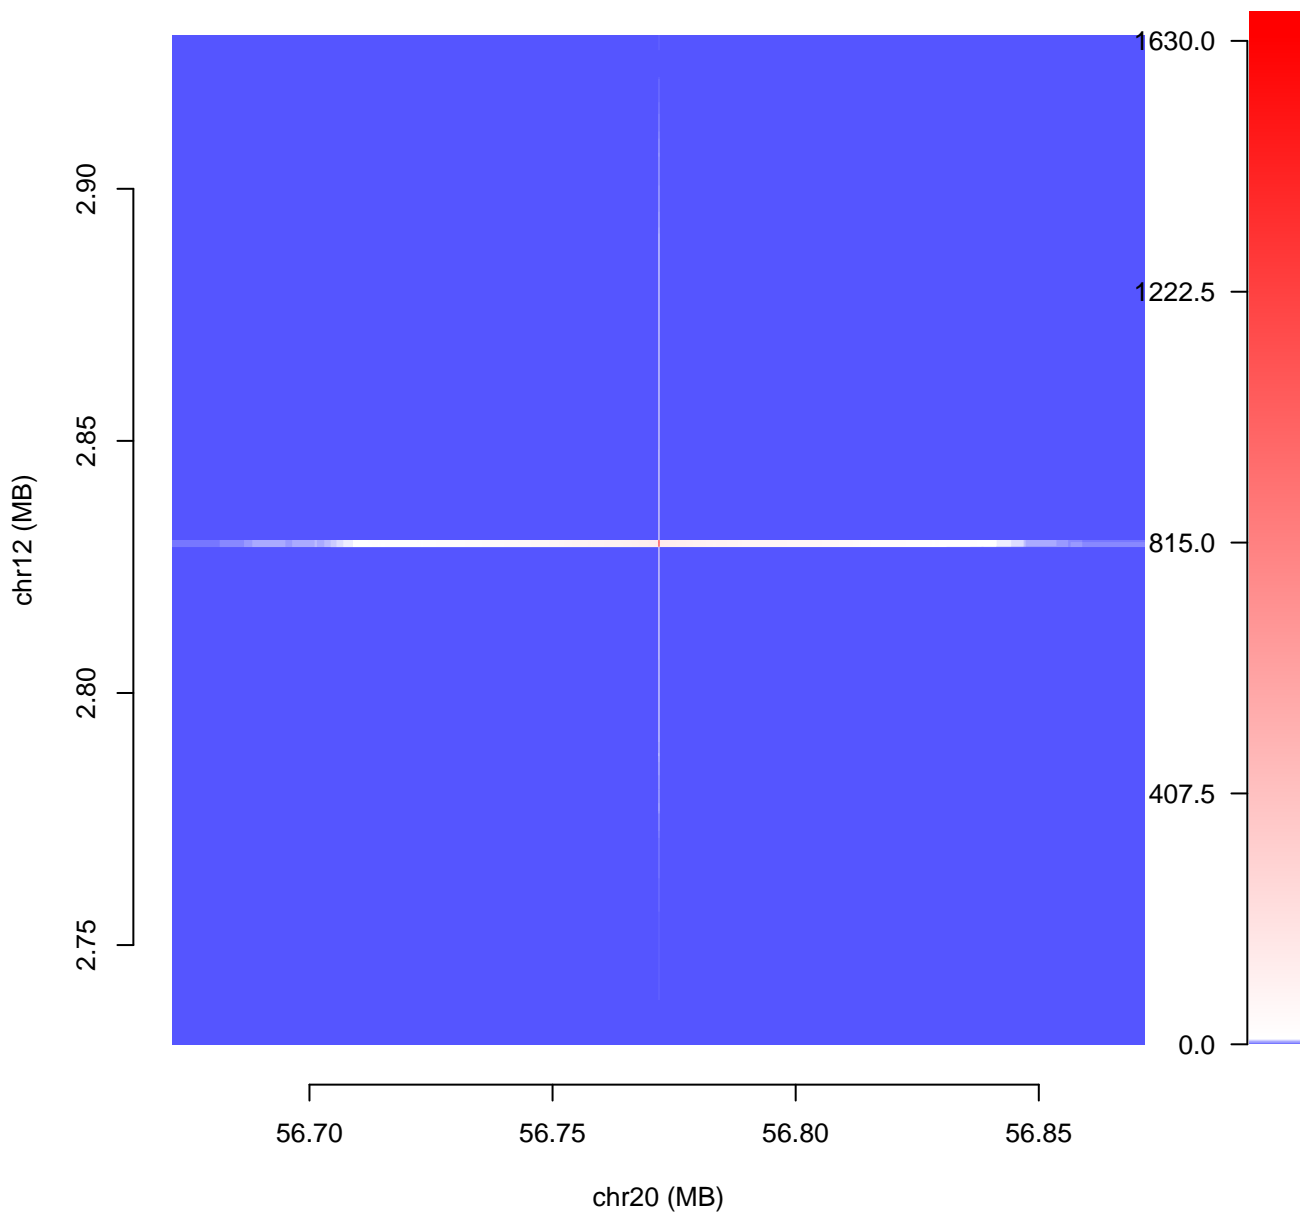

Supplement: Supplemental_Data.zip [file event_69.pdf › event_69.pdf]

Barcode

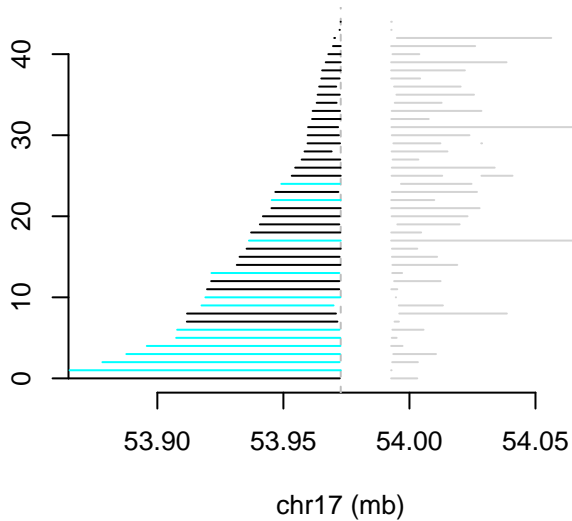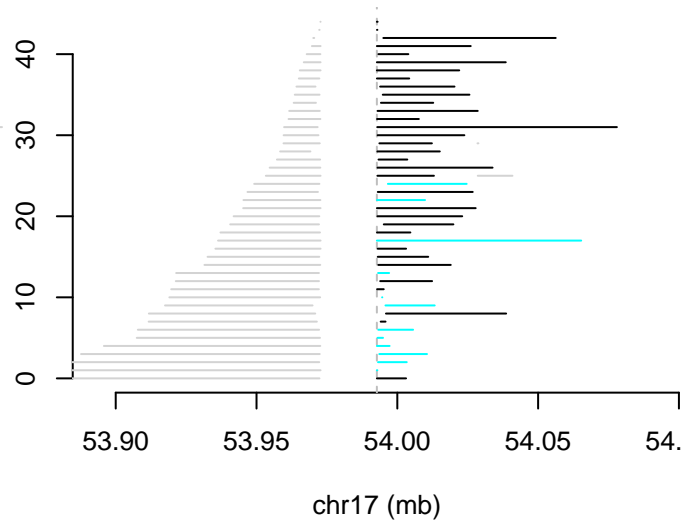

Copy number

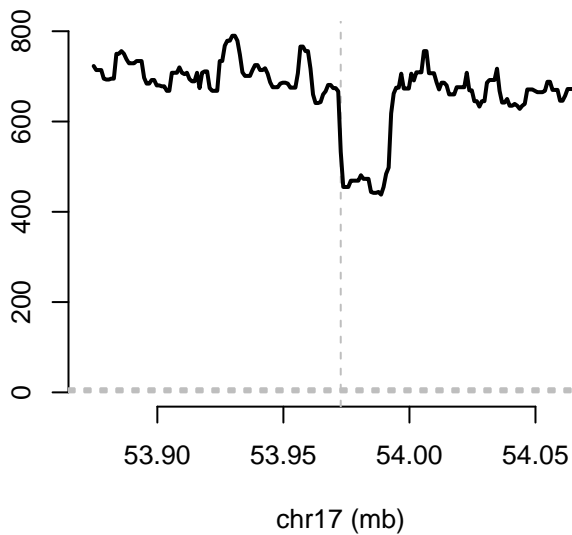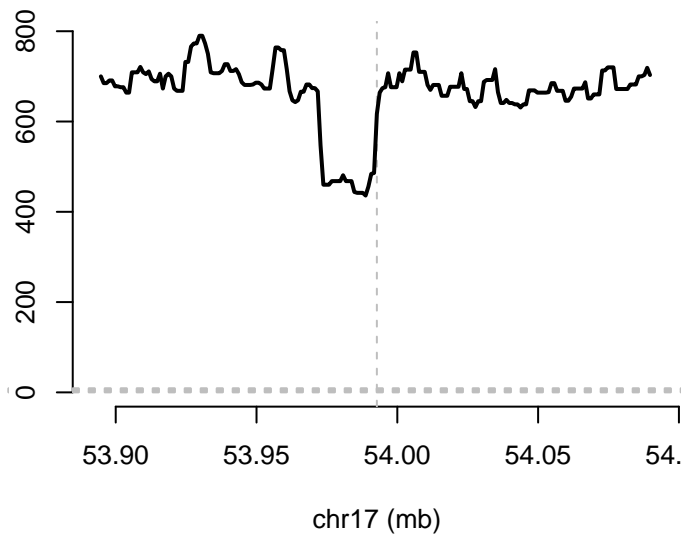

K562 chr17:53,992,739::chr17:53,972,746-+

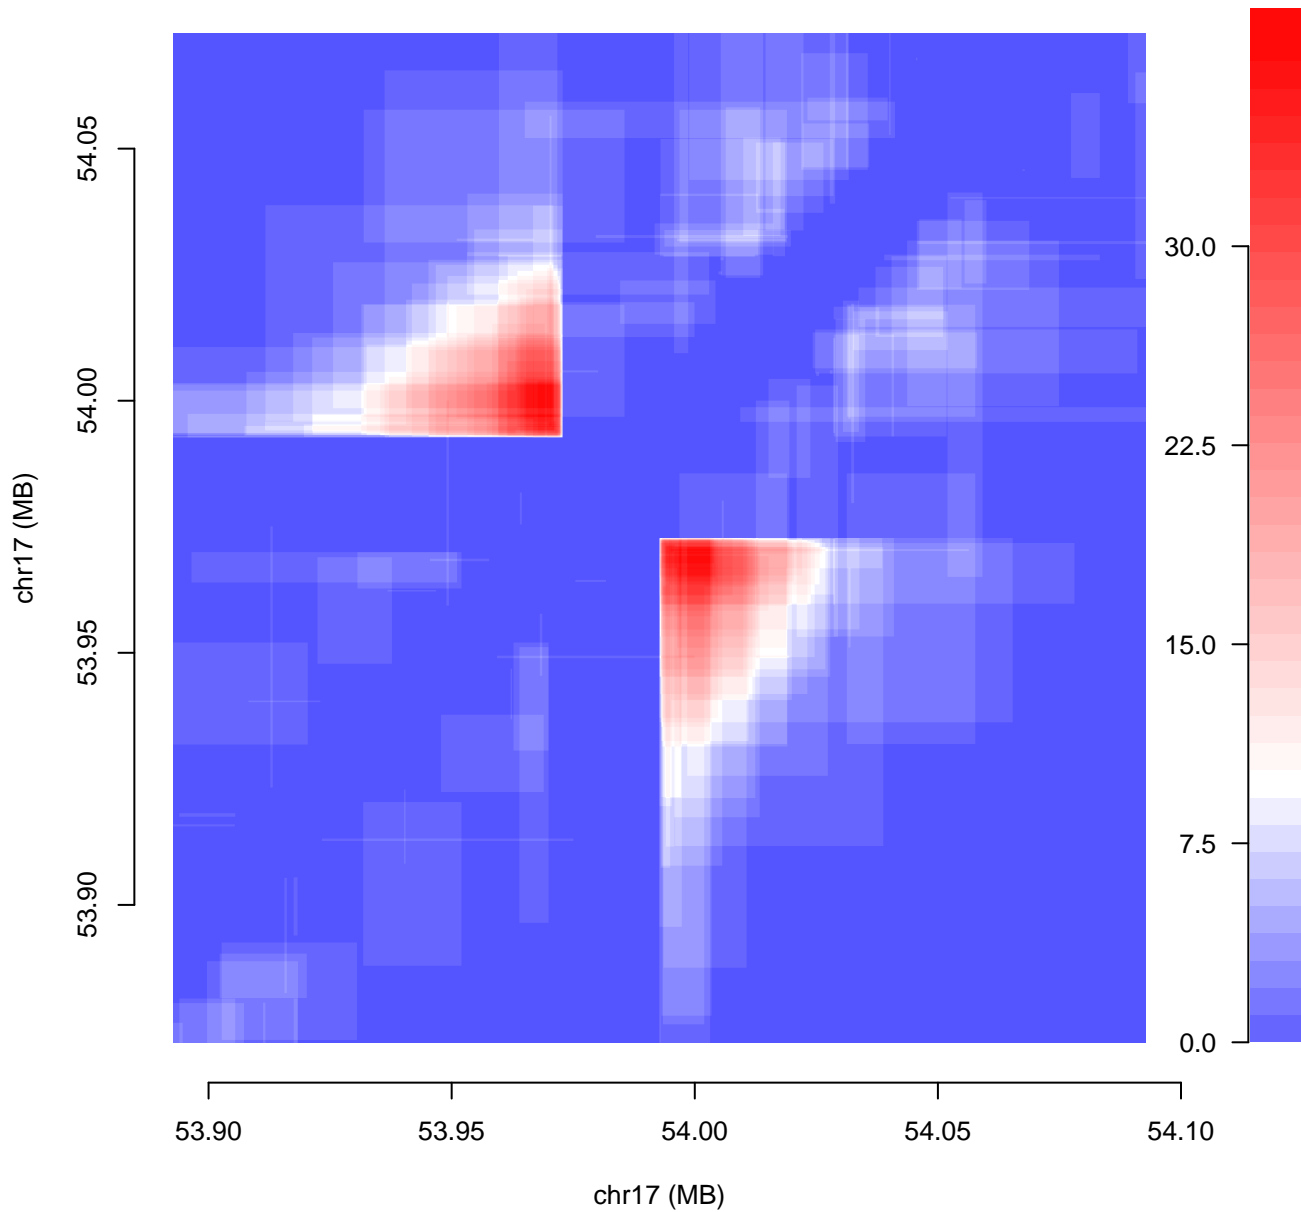

Supplement: Supplemental_Data.zip [file event_7.pdf › event_7.pdf]

Barcode

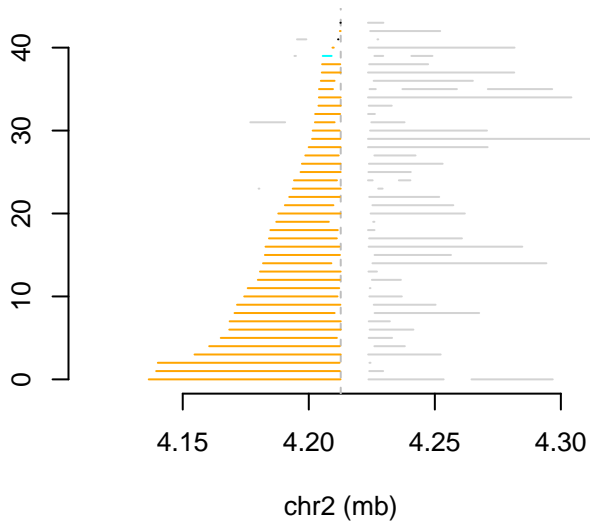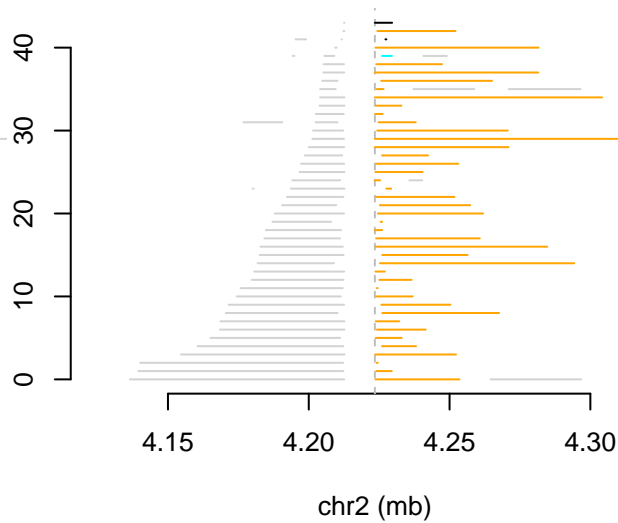

Copy number

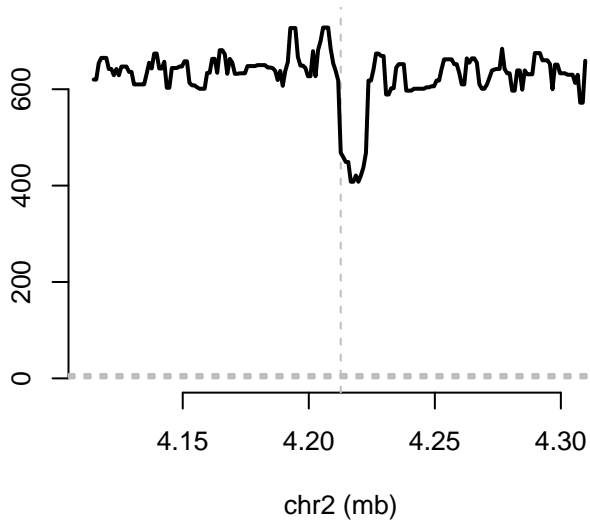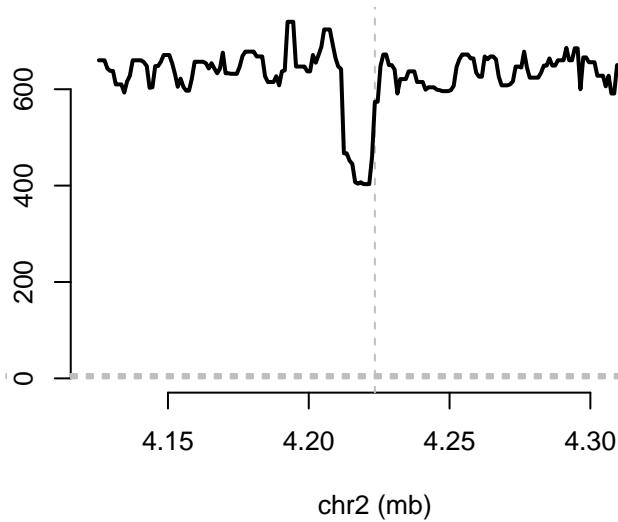

K562 chr2:4,212,676::chr2:4,223,477+-

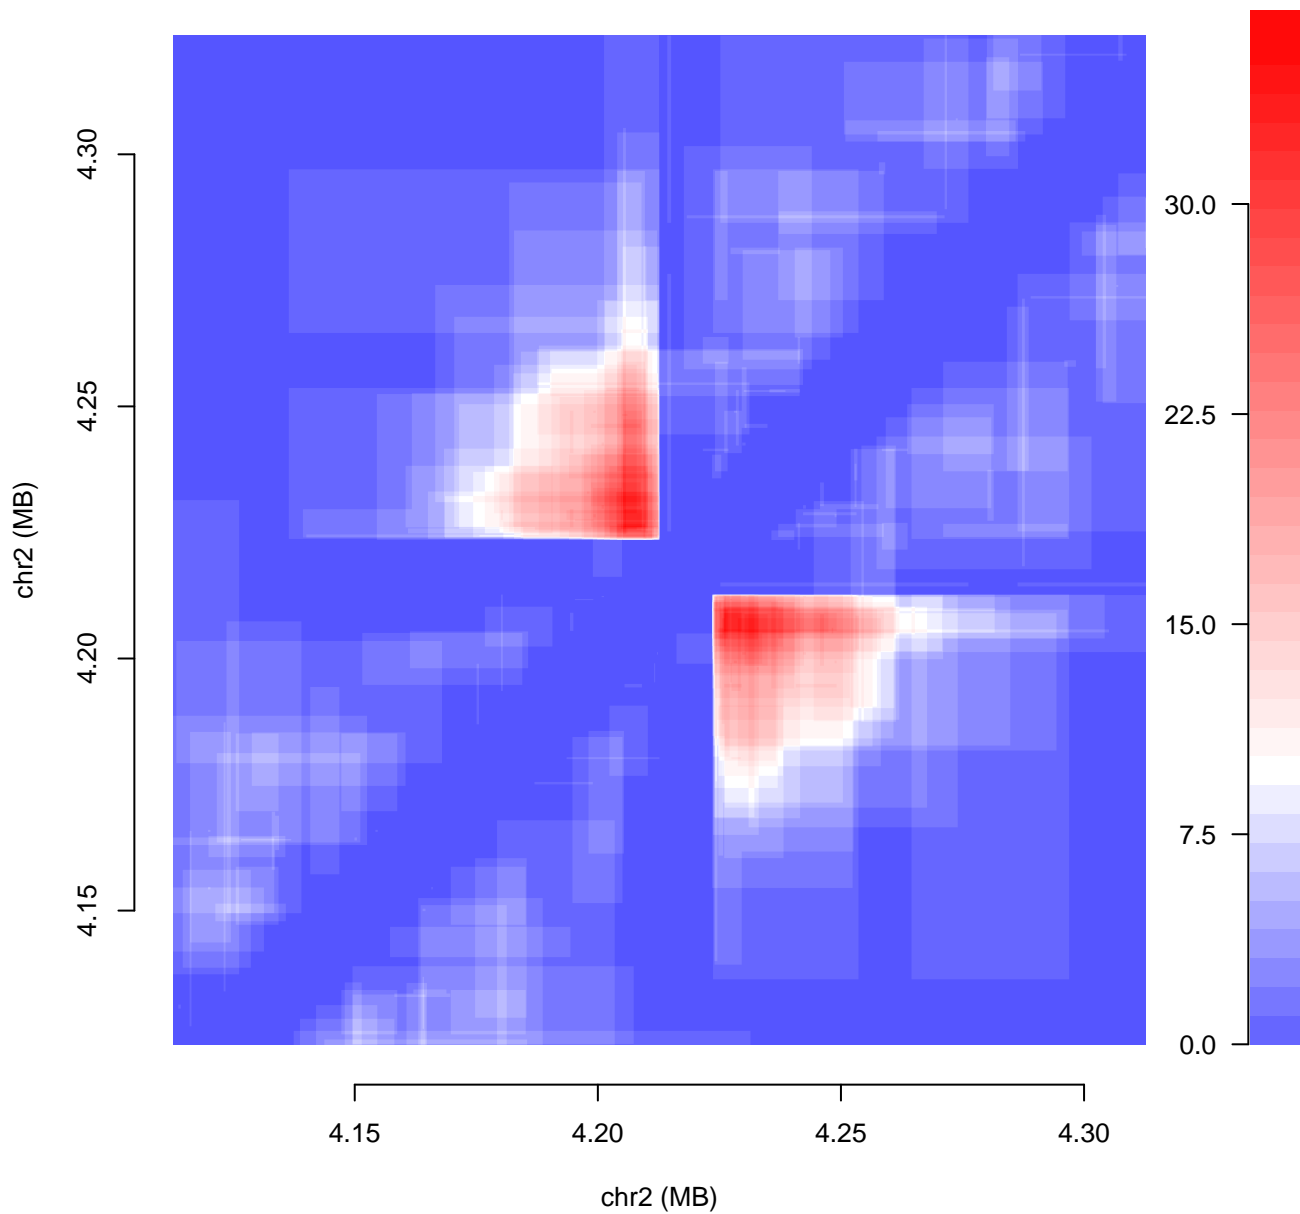

Supplement: Supplemental_Data.zip [file event_70.pdf › event_70.pdf]

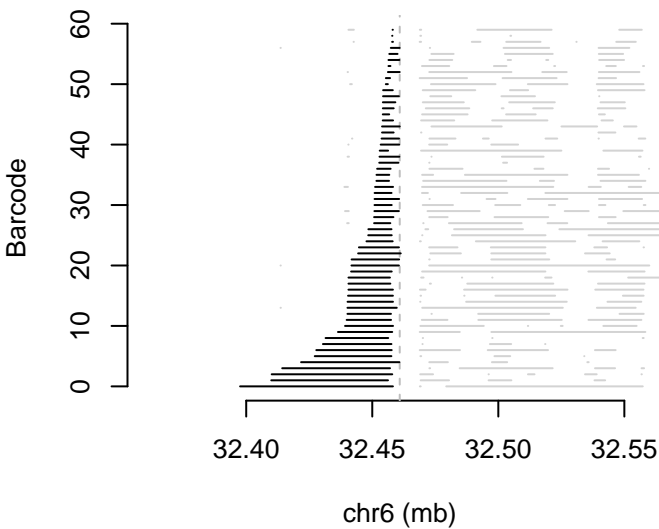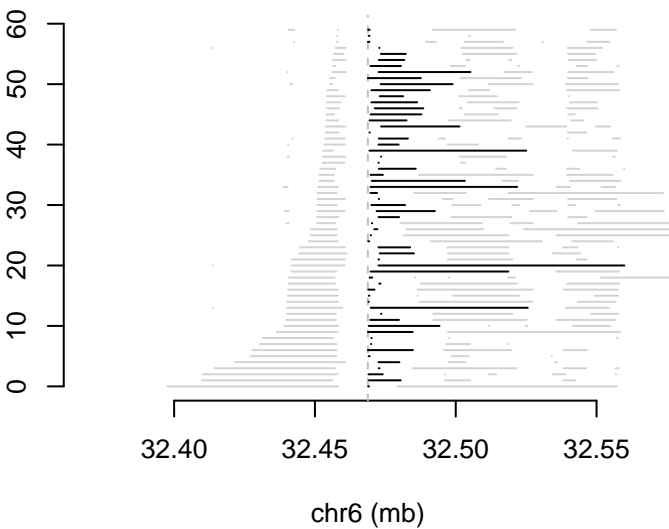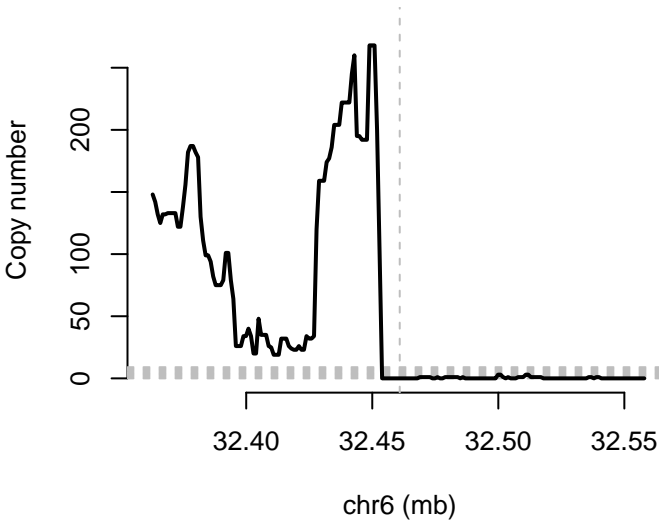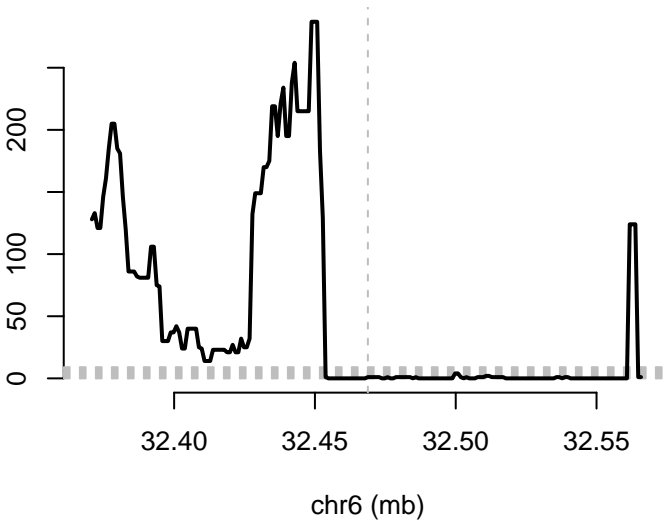

K562 chr6:32,468,801::chr6:32,460,900-+

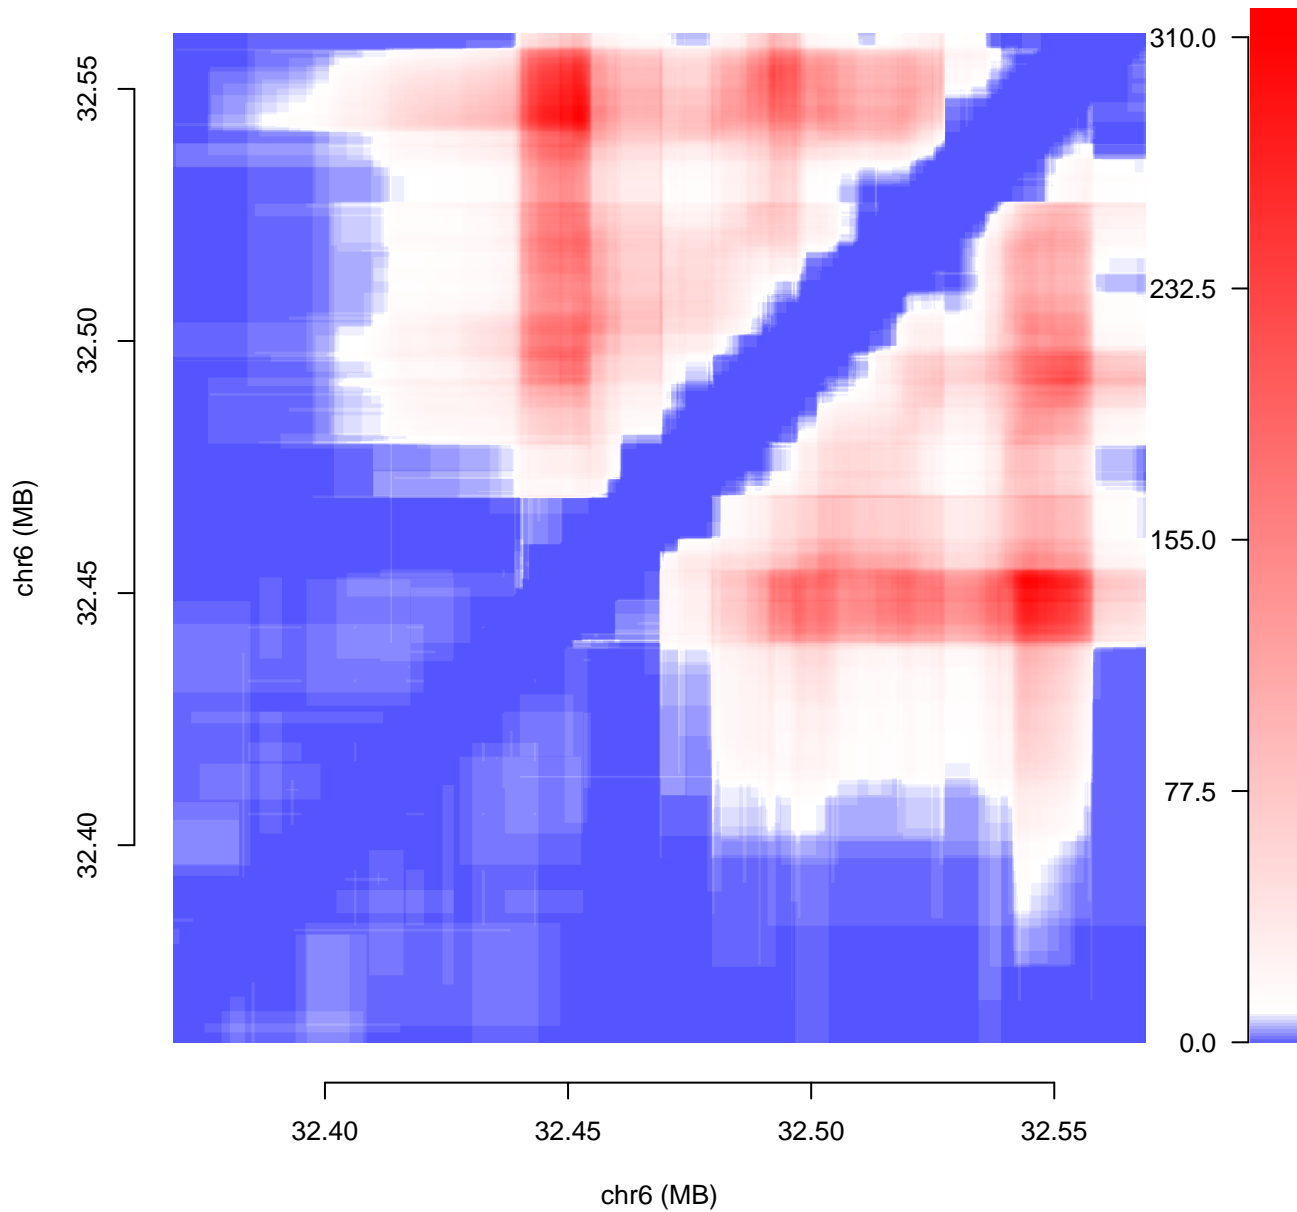

Supplement: Supplemental_Data.zip [file event_71.pdf › event_71.pdf]

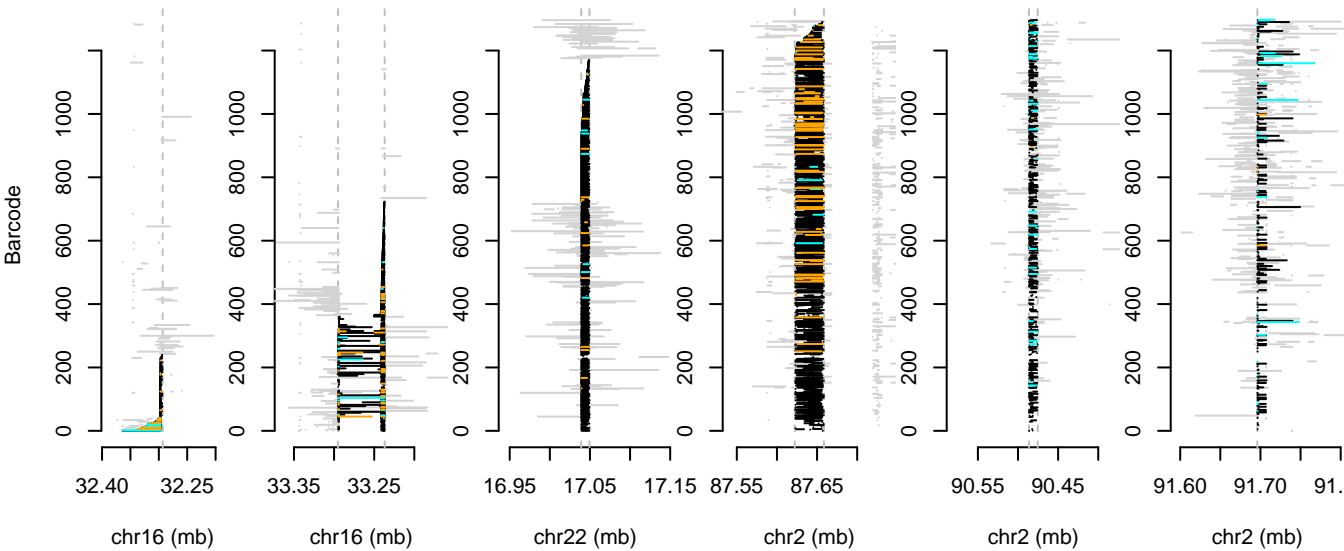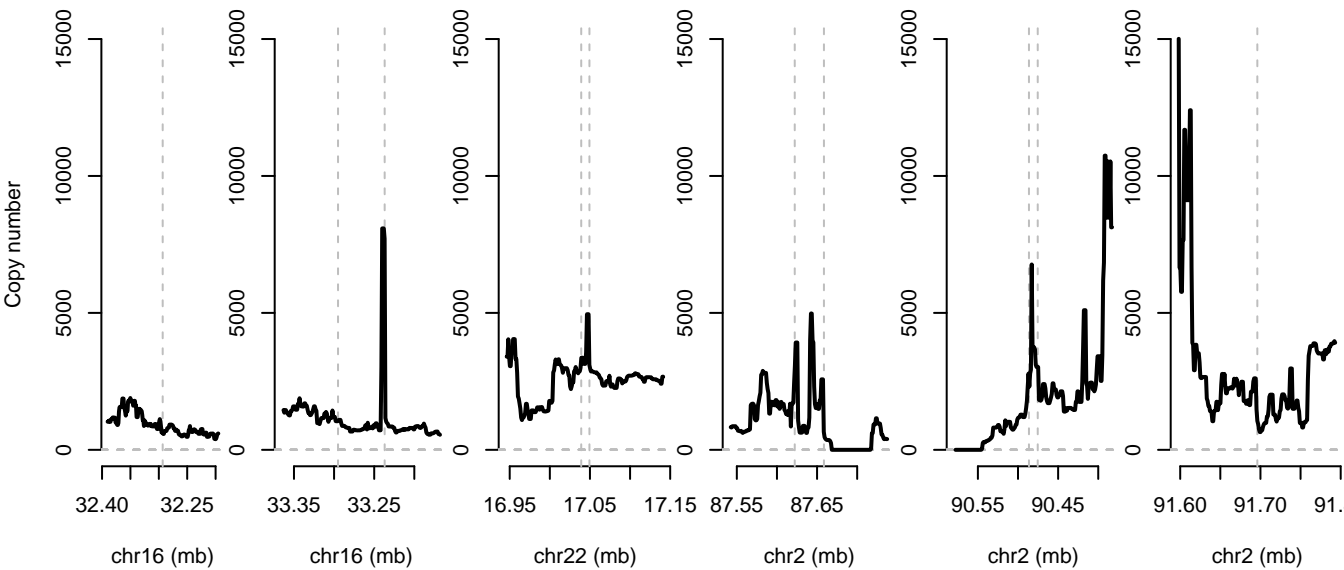

K562 chr22:17,039,138::chr22:17,049,369-+

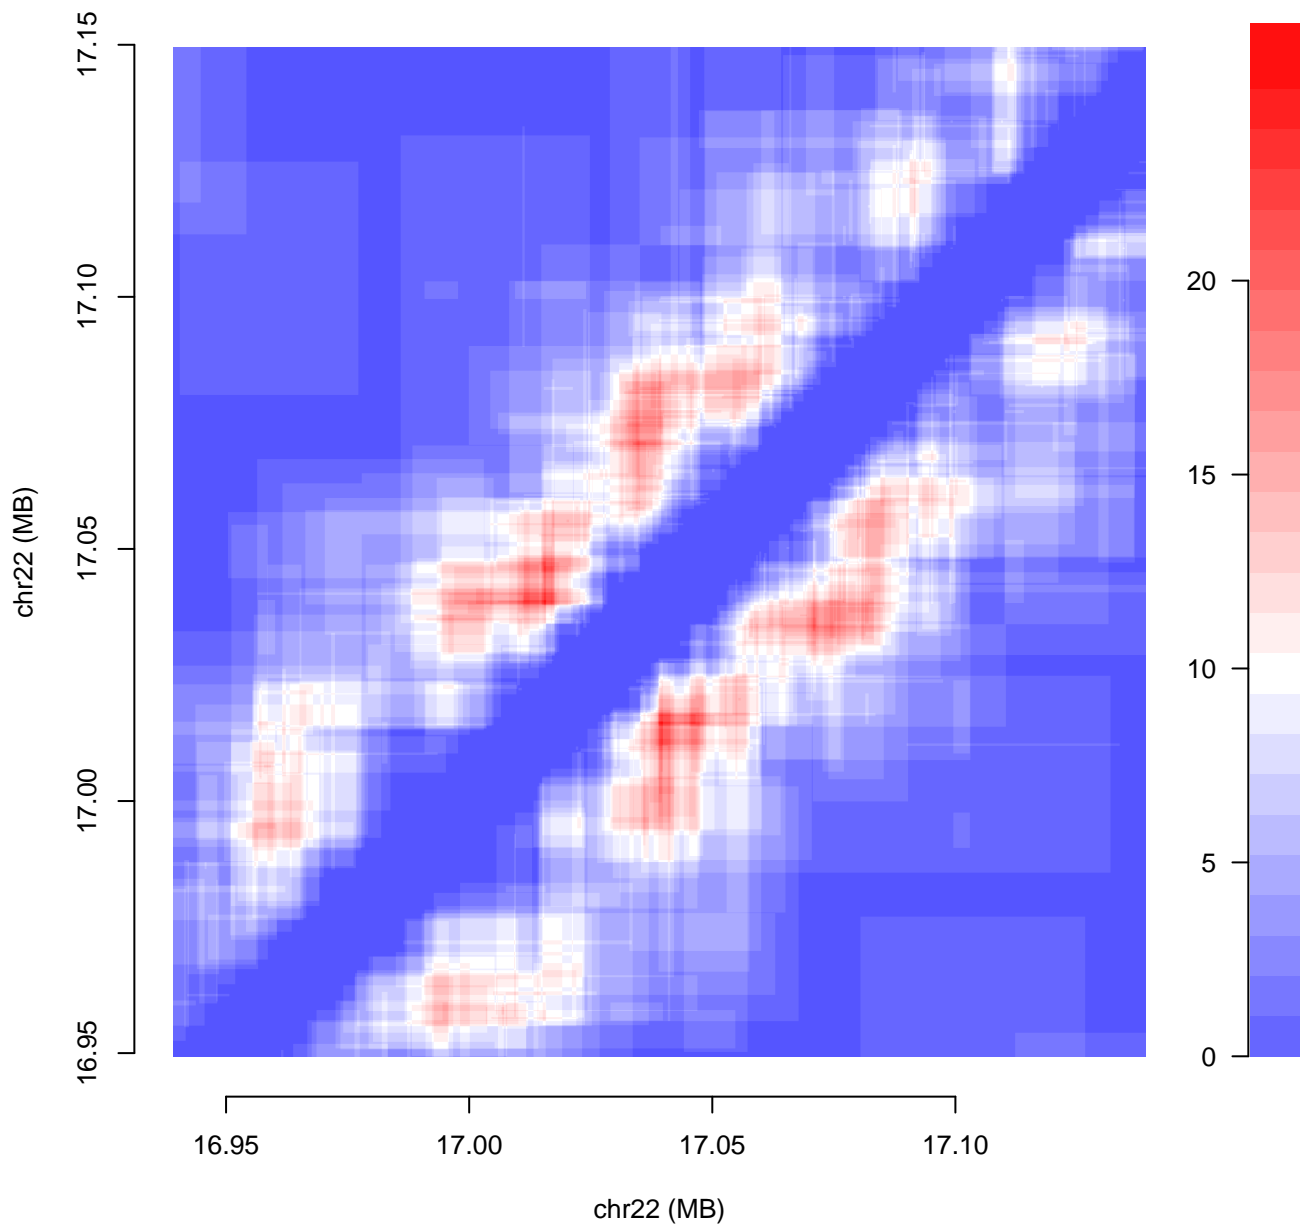

K562 chr22:17,039,138::chr16:33,236,983--

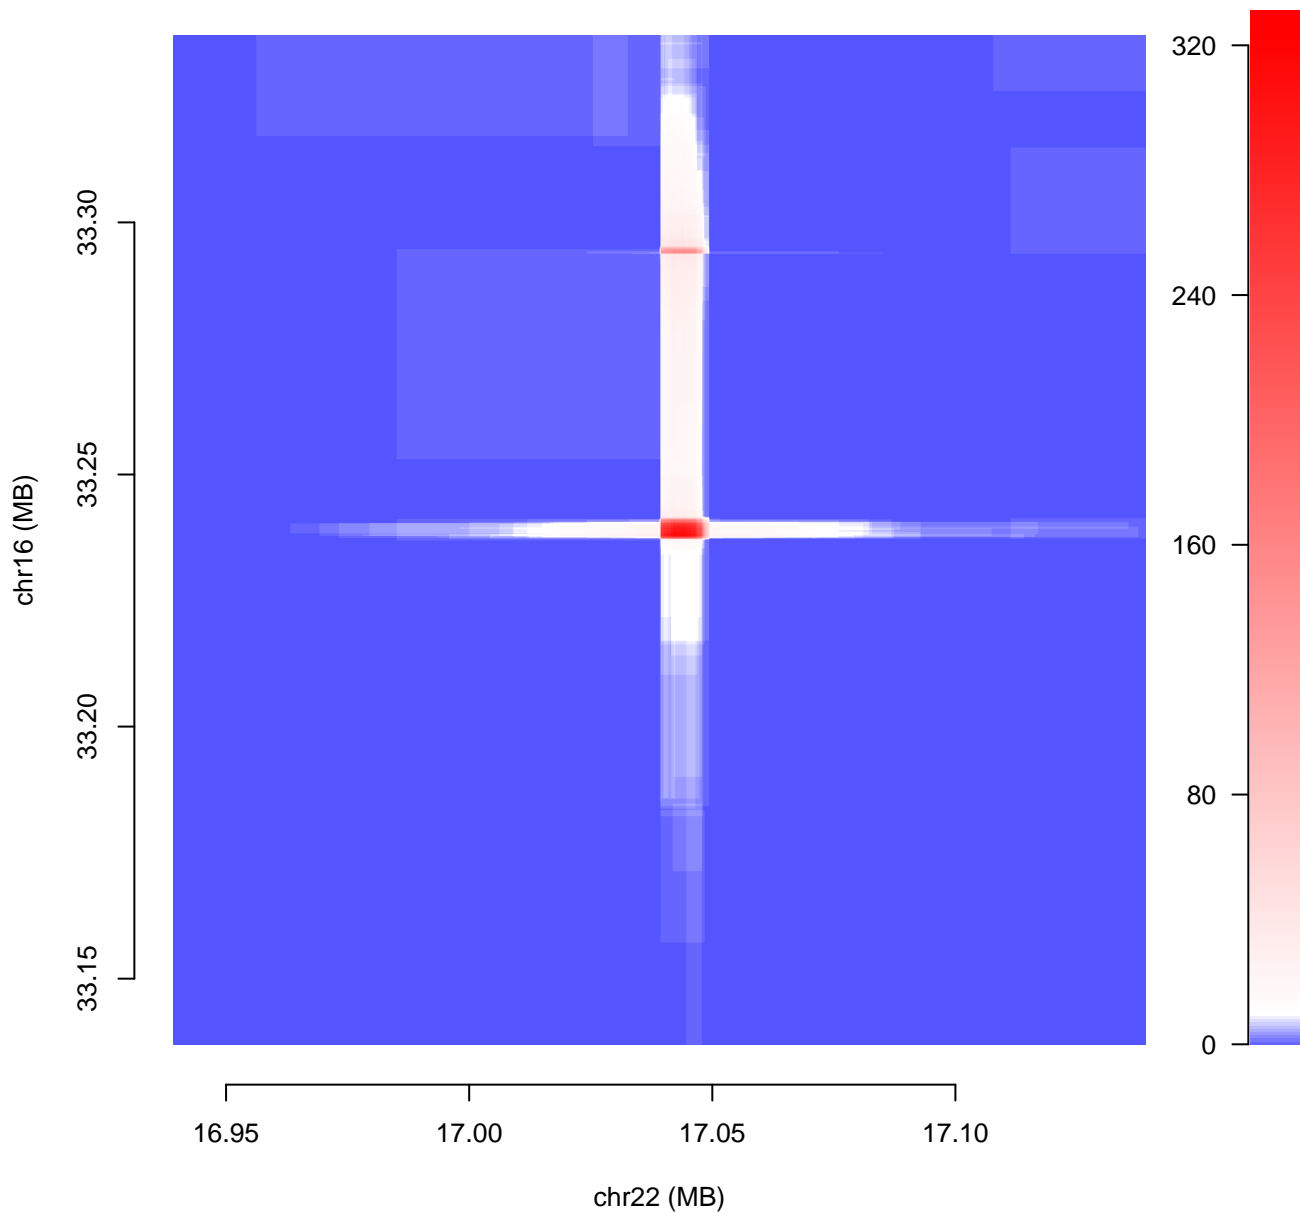

K562 chr2:91,696,134::chr2:90,475,422--

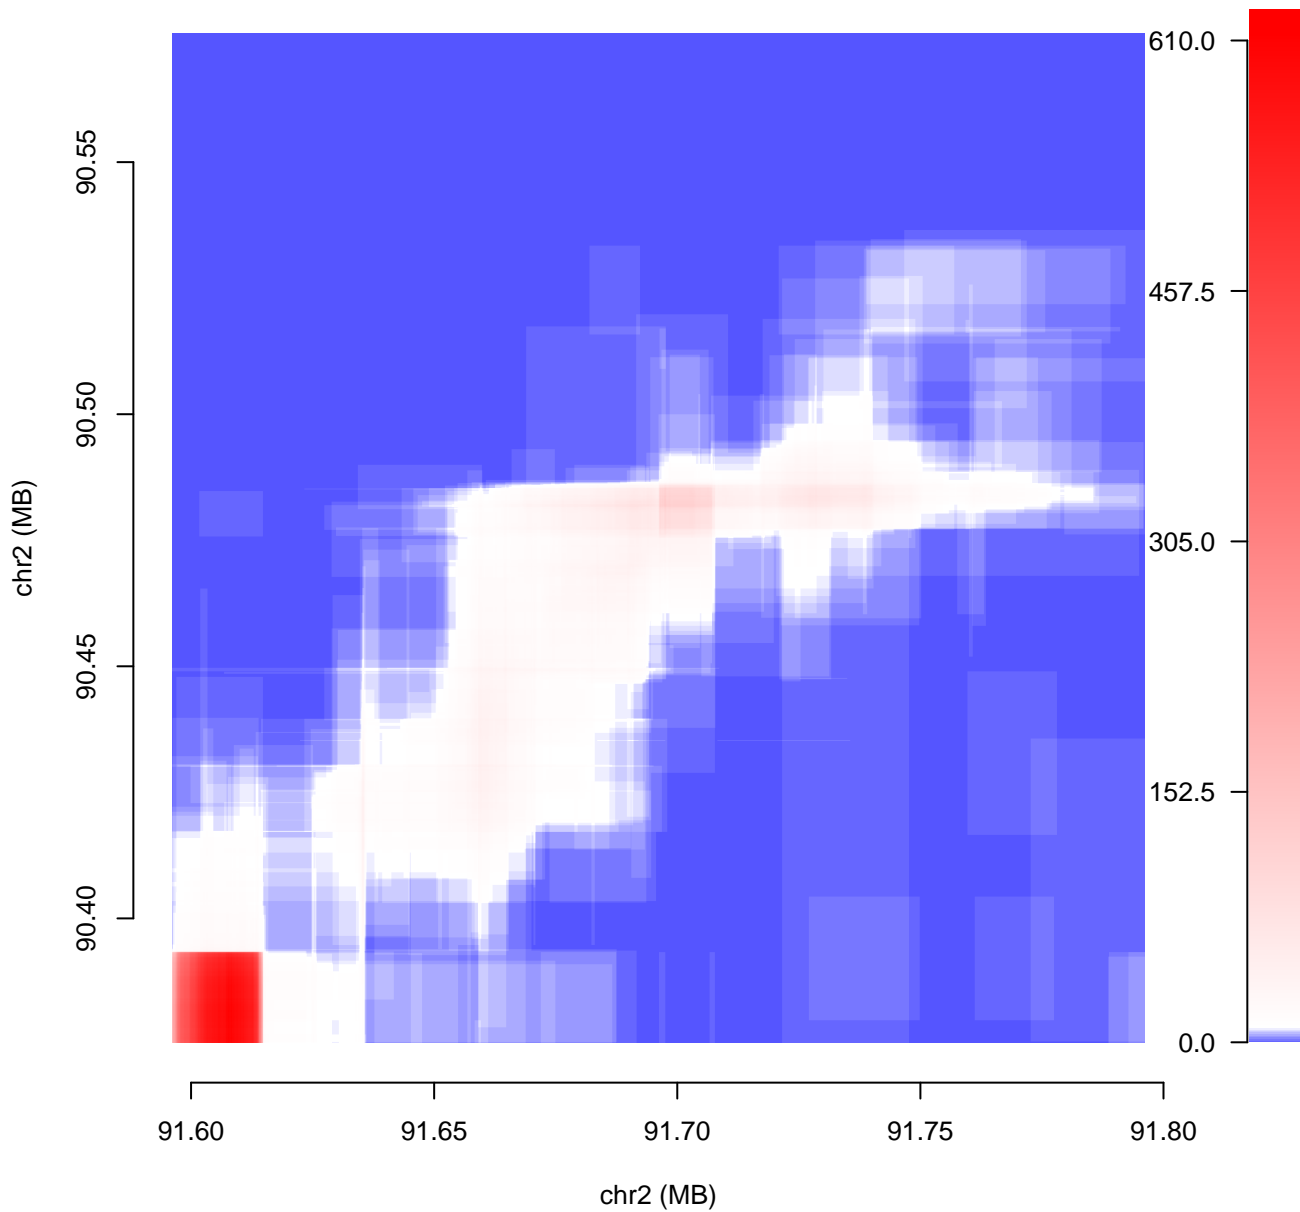

K562 chr16:33,295,090::chr16:32,293,190+-

chr16 (MB)

32.40  
32.35  
32.30  
32.25  
32.20

33.20

33.25

33.30

33.35

33.40

chr16 (MB)

140

105

70

35

0

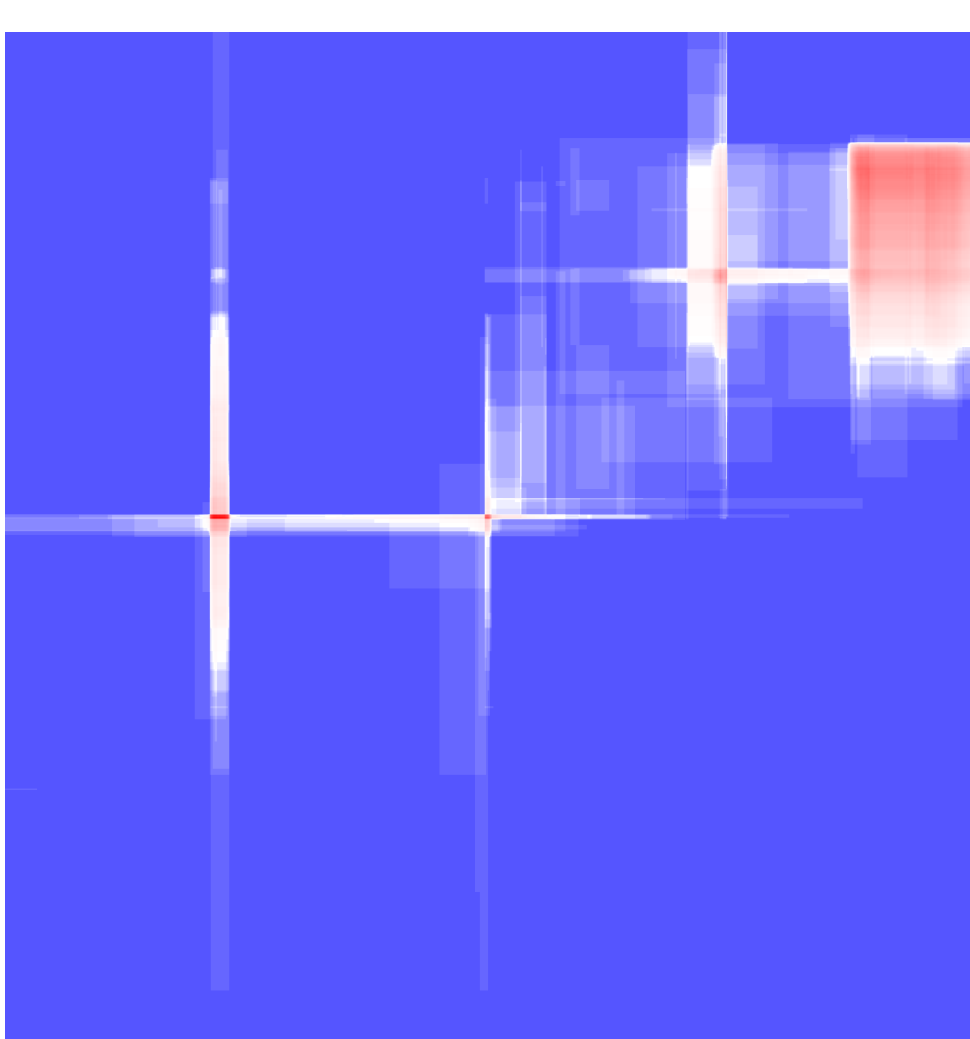

K562 chr16:33,295,090::chr16:33,236,983+-

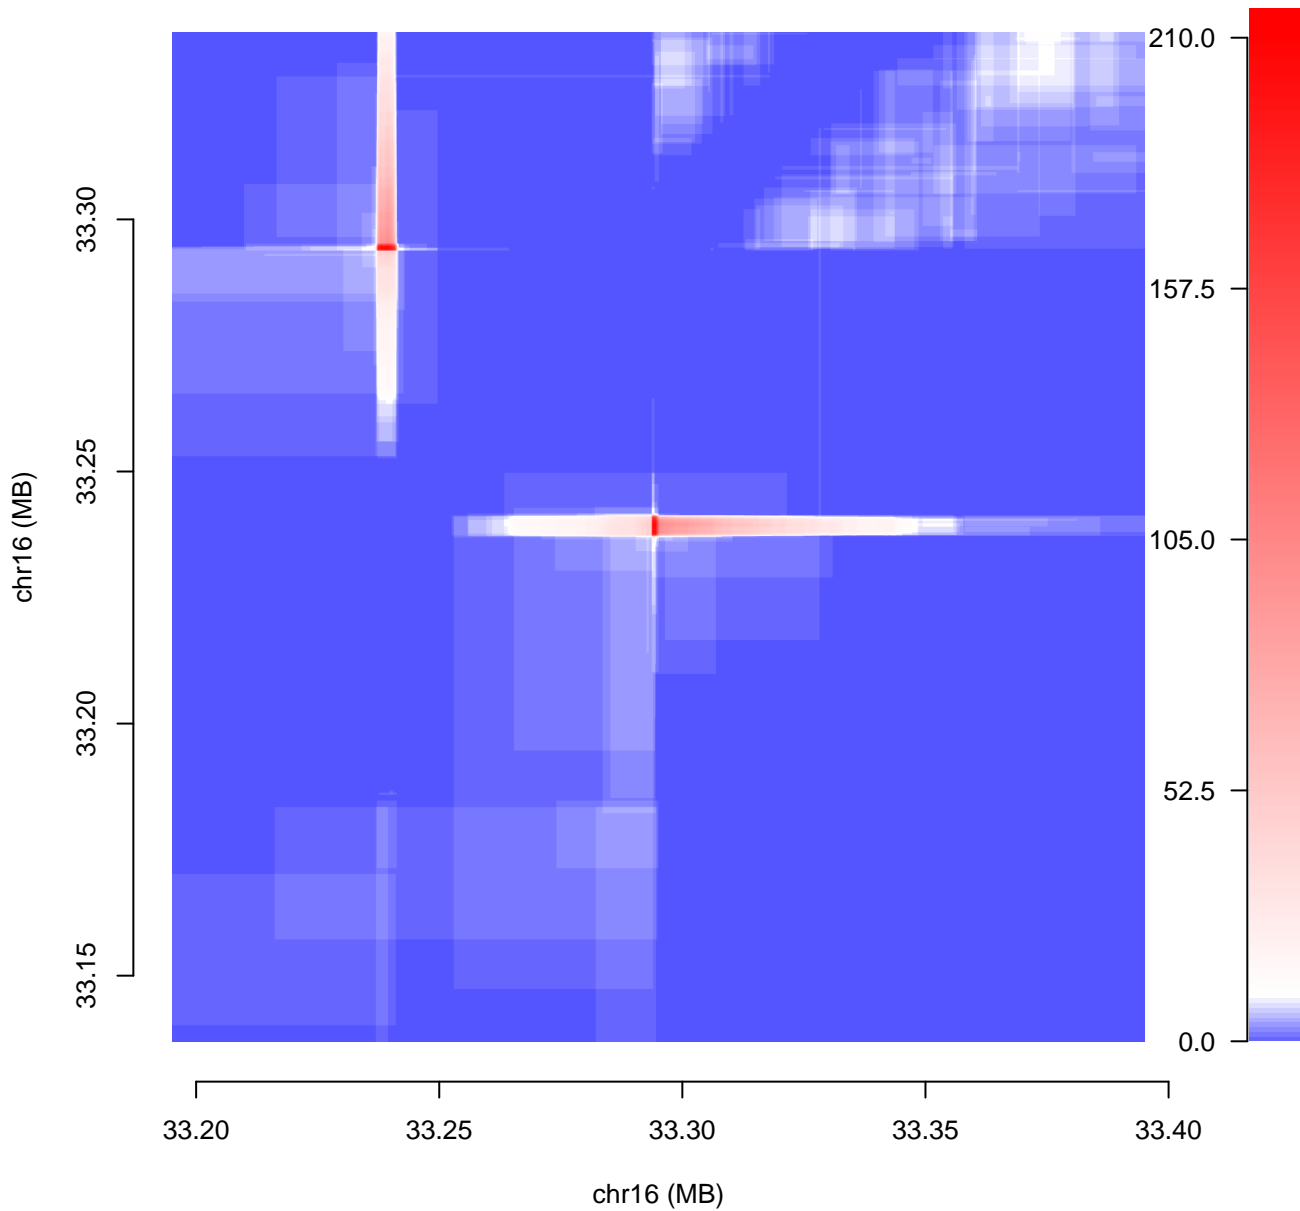

K562 chr2:87,622,189::chr2:87,658,561-+

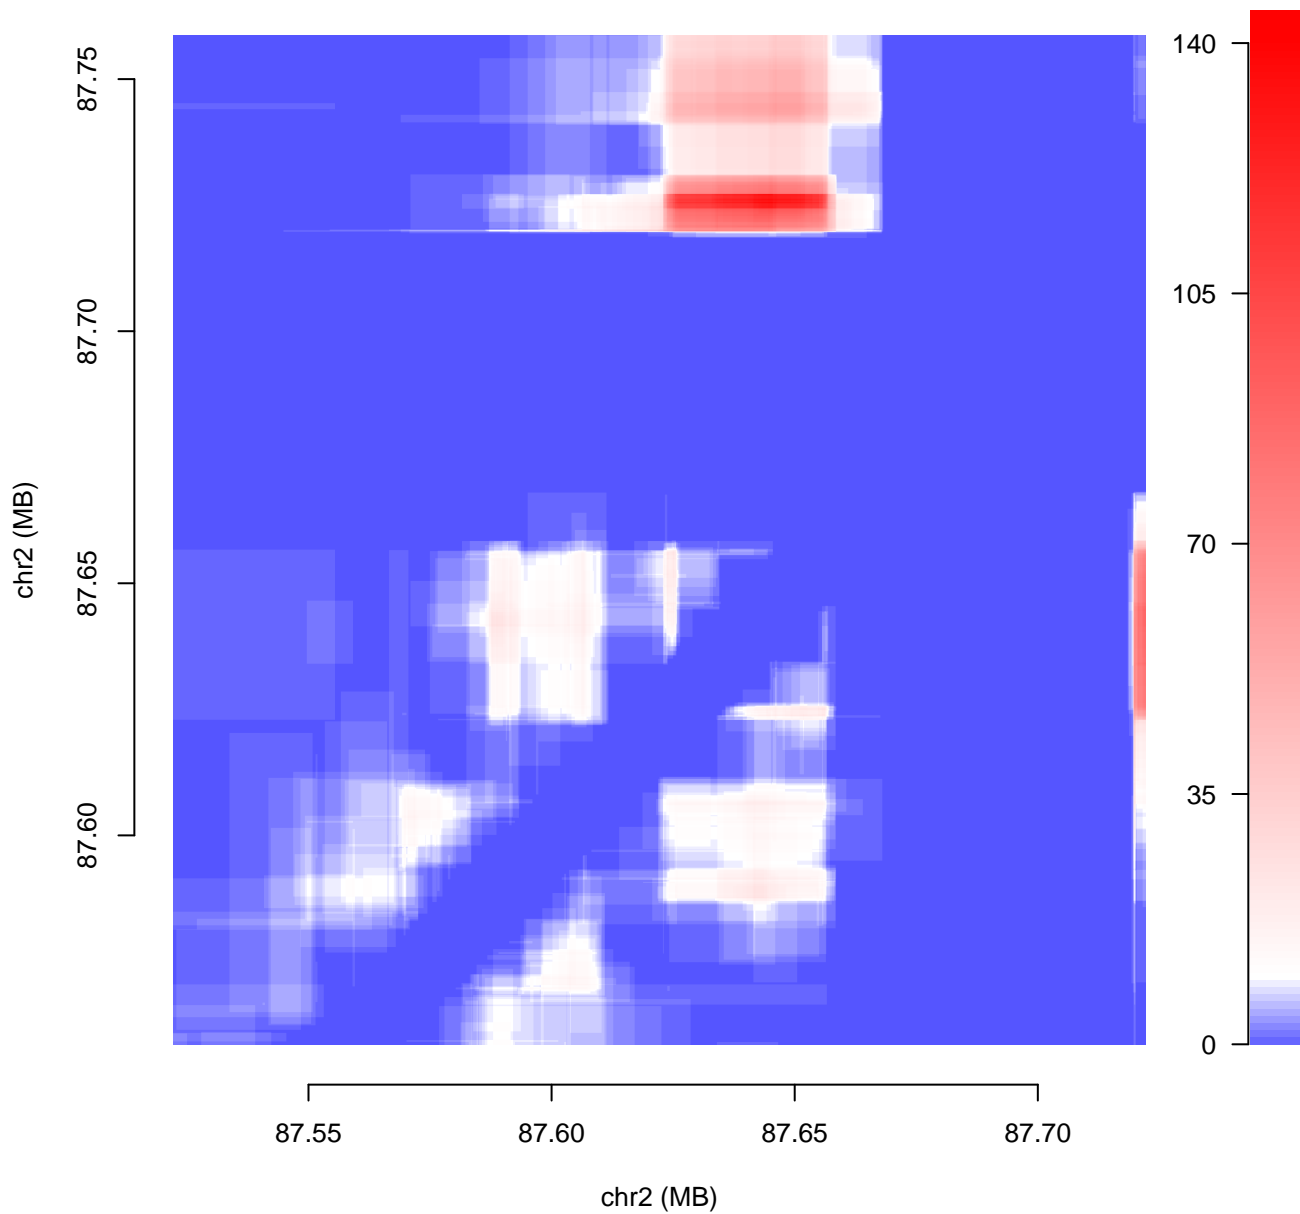

K562 chr2:87,622,189::chr22:17,049,369-+

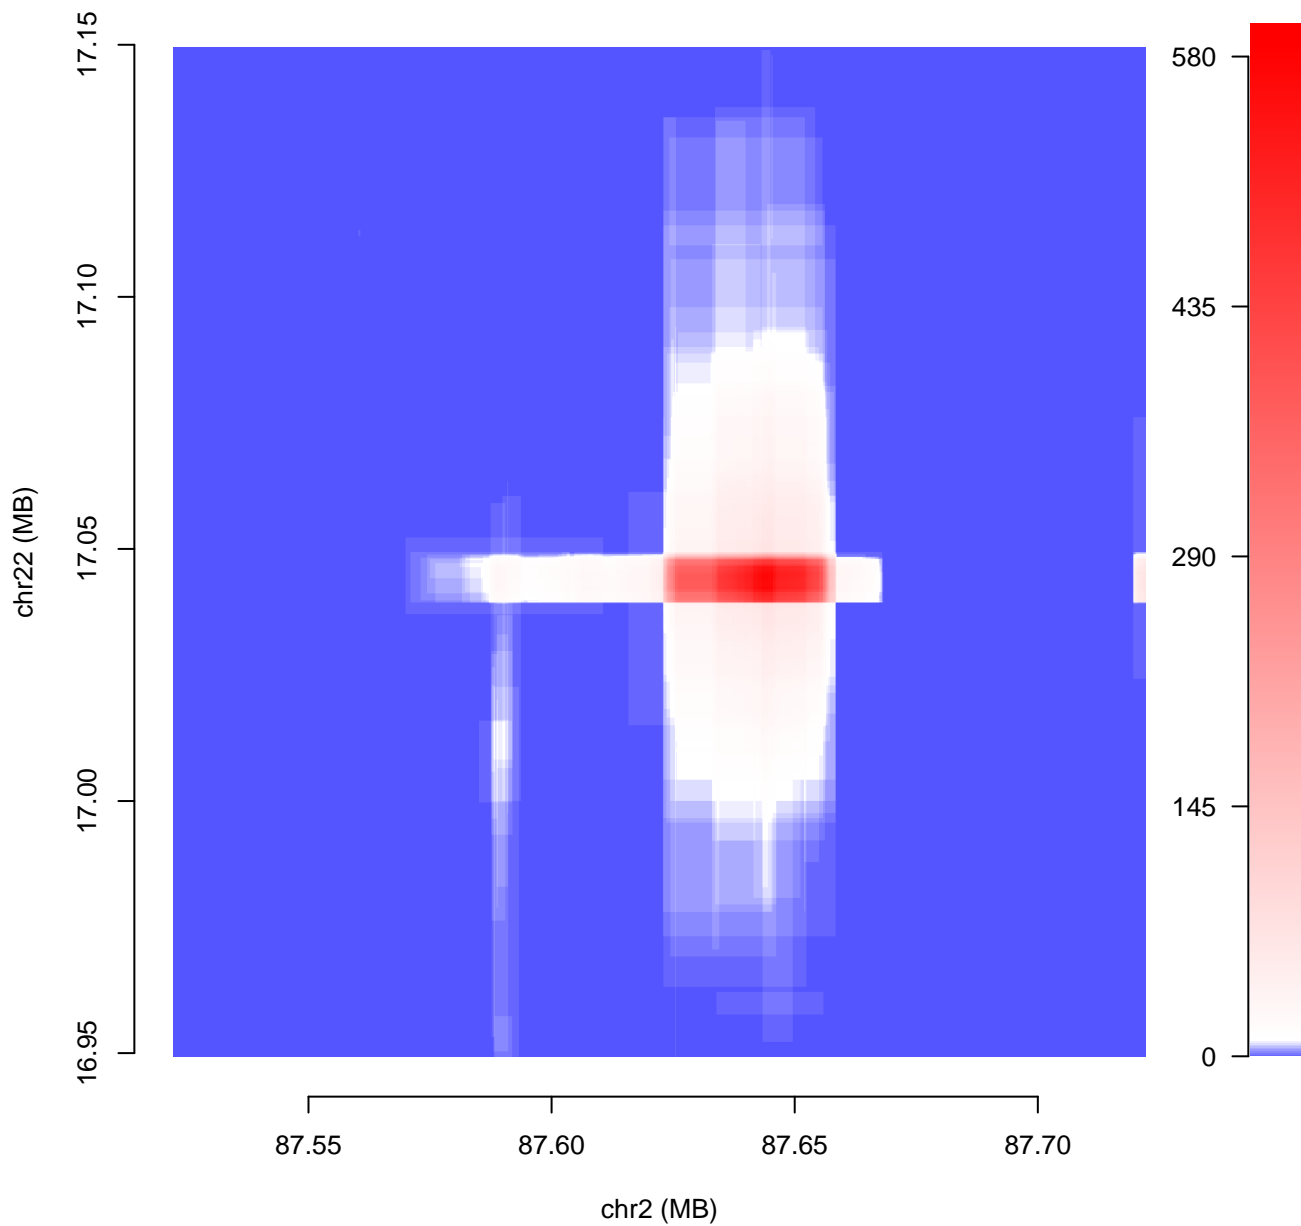



K562 chr2:90,486,342::chr2:87,658,561++

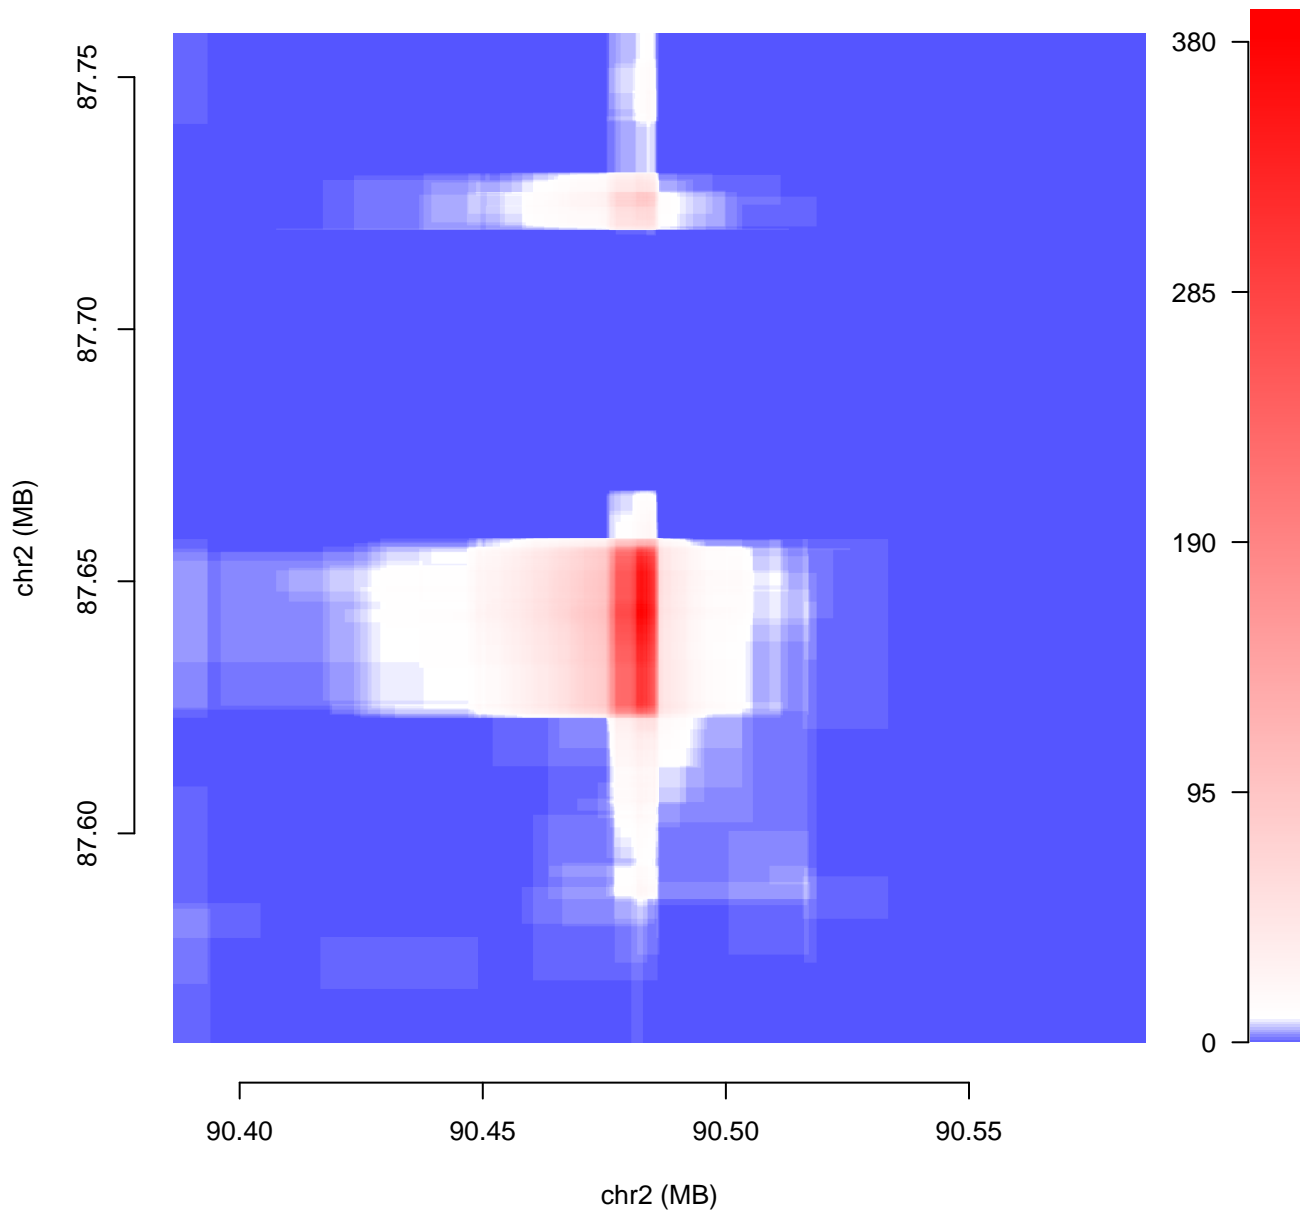

K562 chr2:90,486,342::chr2:90,475,422+-

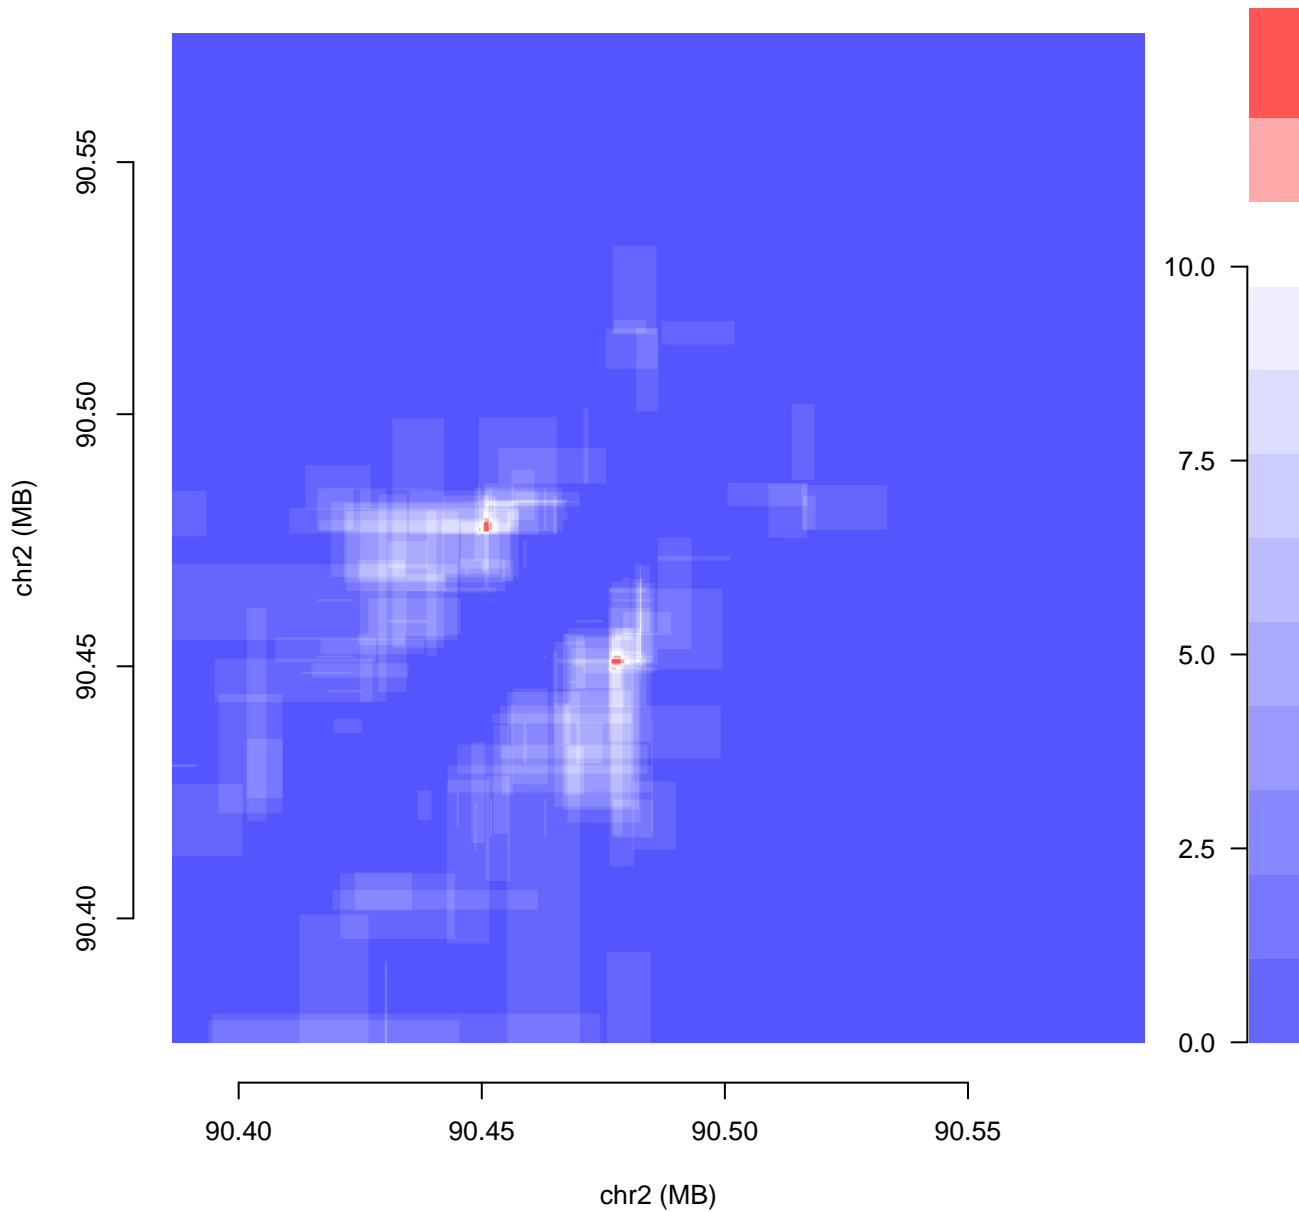

Supplement: Supplemental_Data.zip [file event_72.pdf › event_72.pdf]

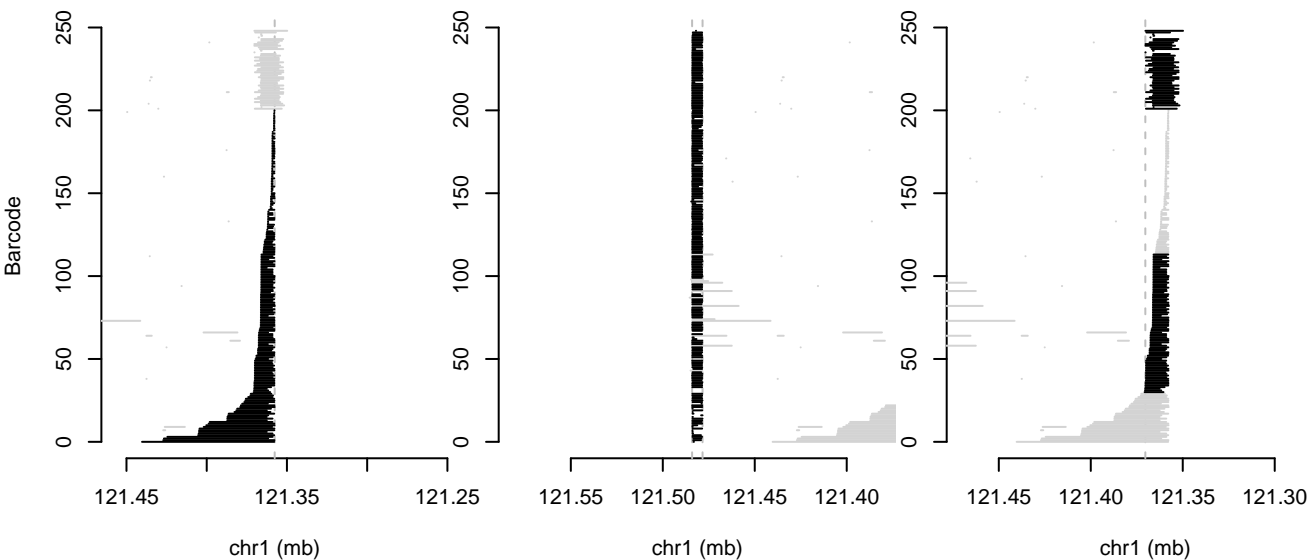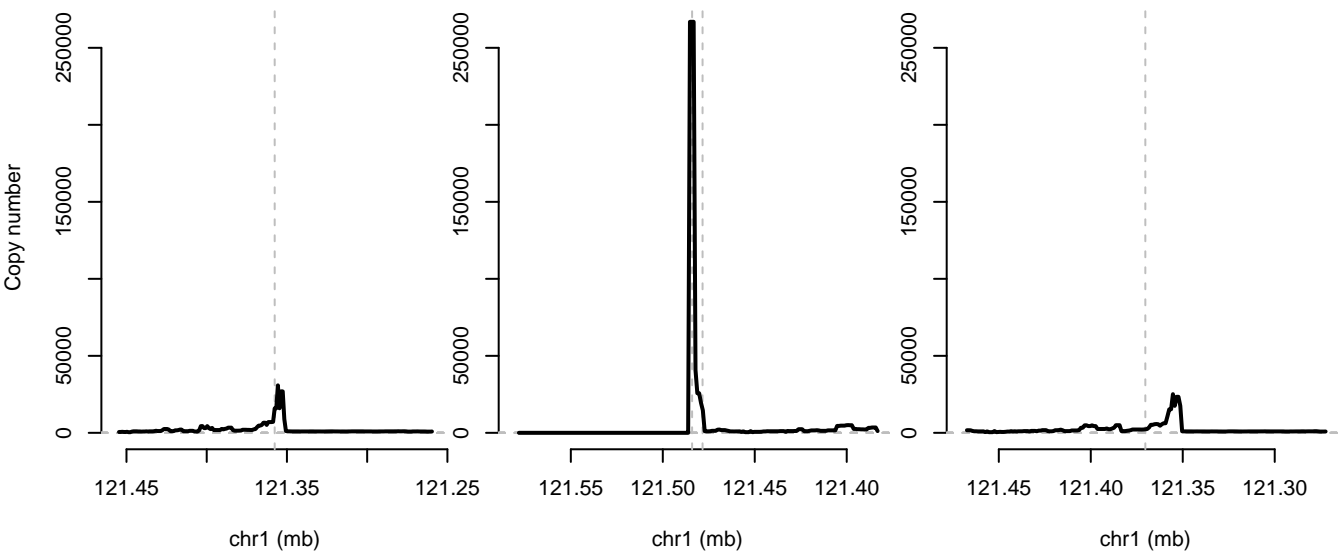

K562 chr1:121,478,372::chr1:121,370,338-+

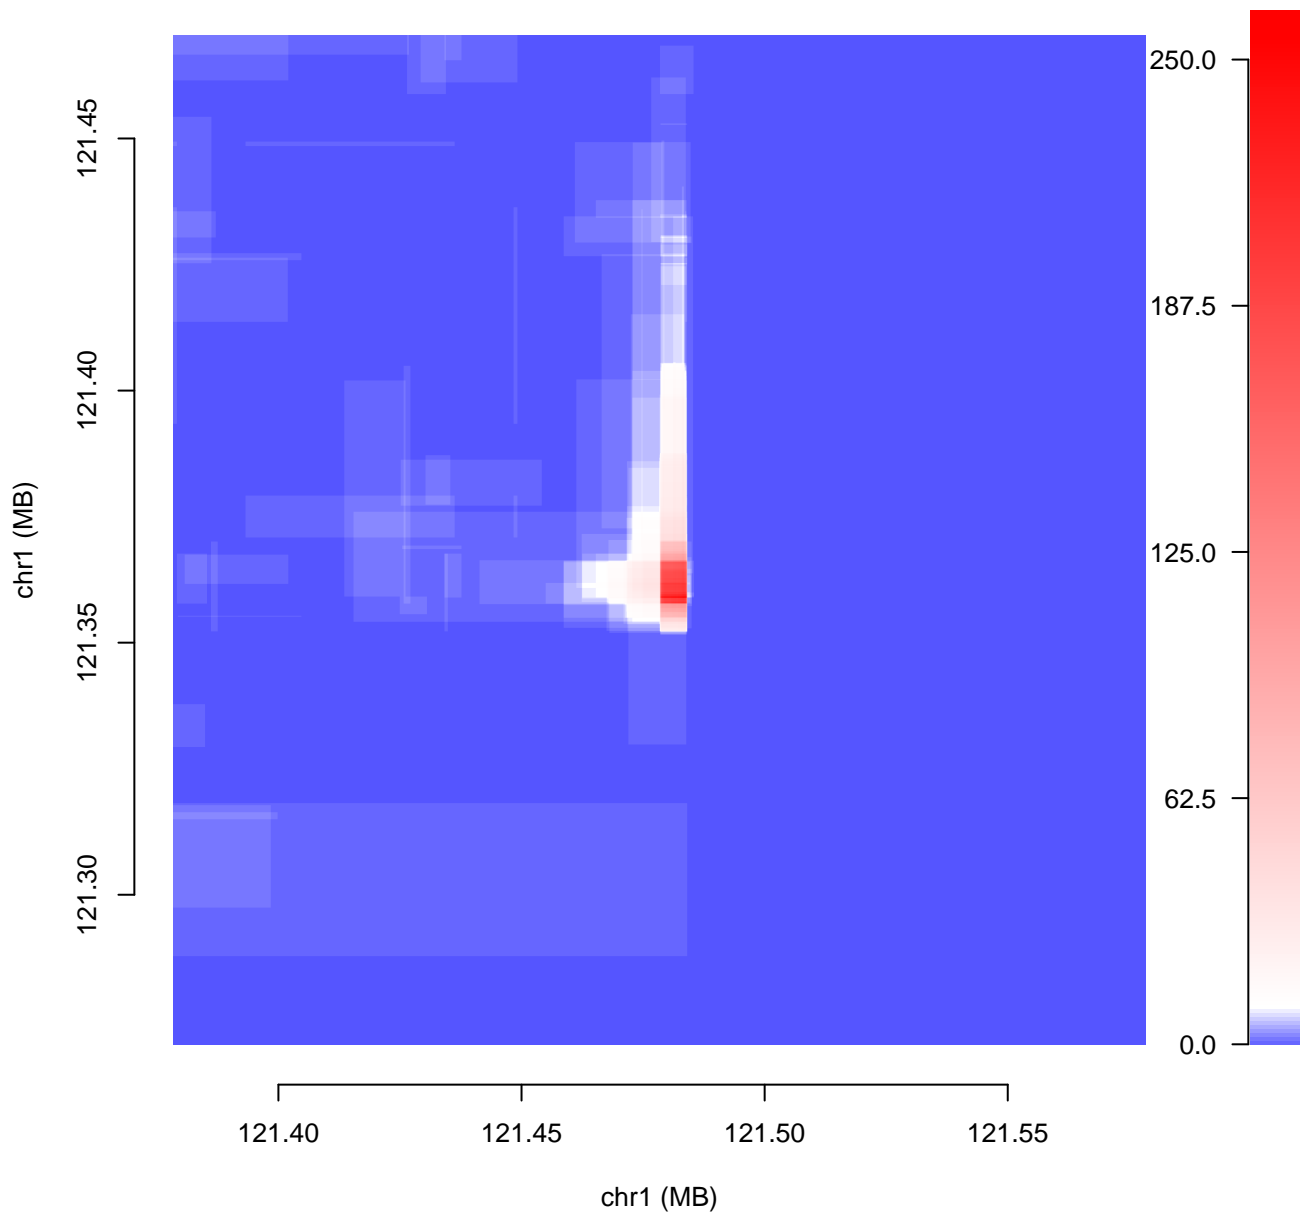

K562 chr1:121,478,372::chr1:121,484,056-+

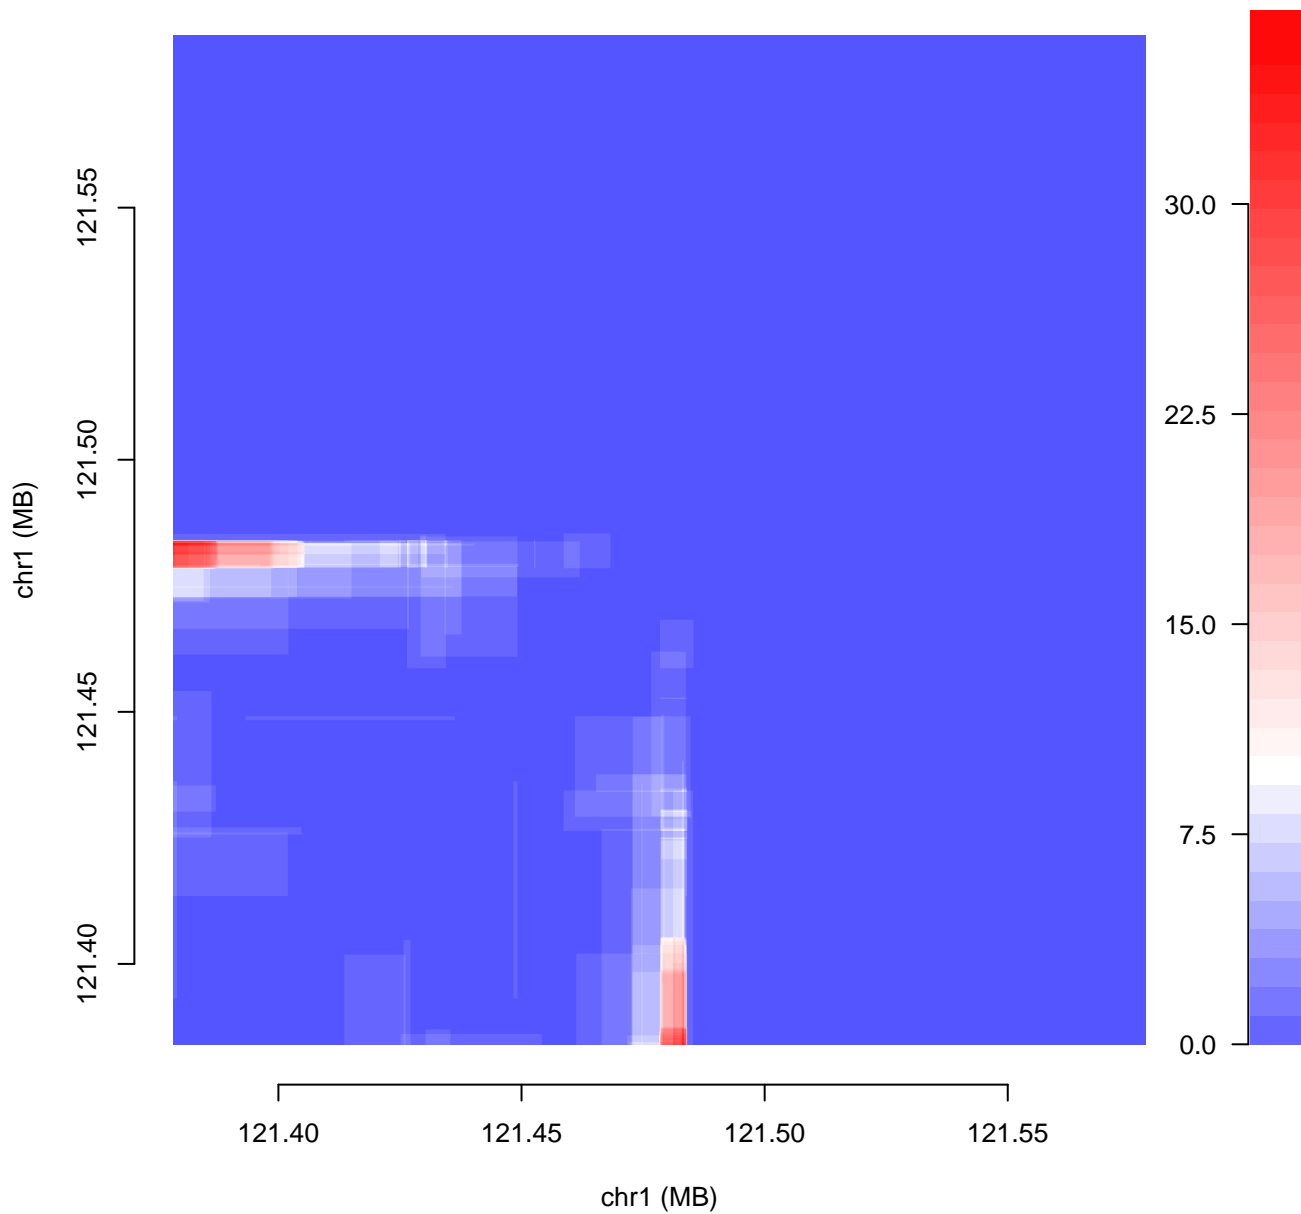

K562 chr1:121,357,638::chr1:121,484,056-+

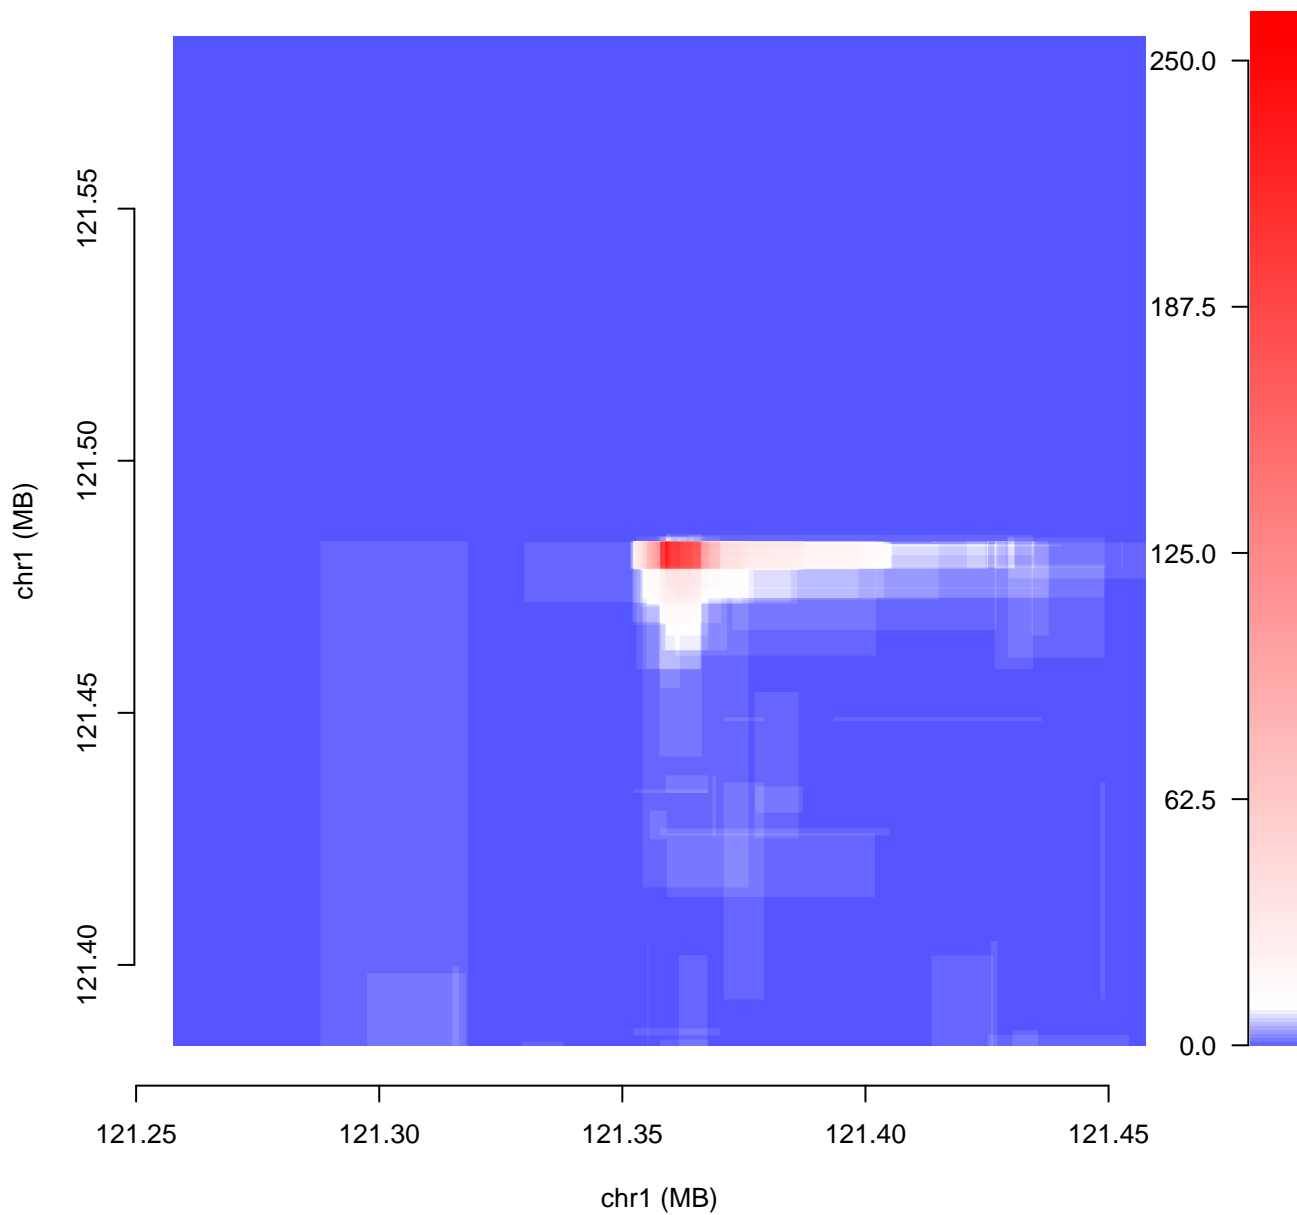

Supplement: Supplemental_Data.zip [file event_73.pdf › event_73.pdf]

Barcode

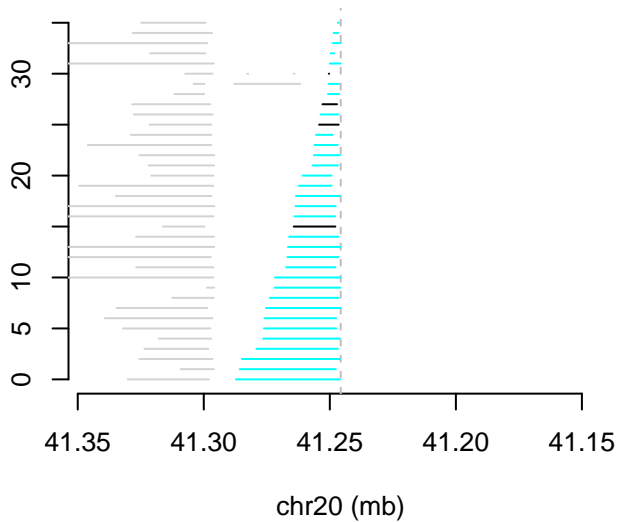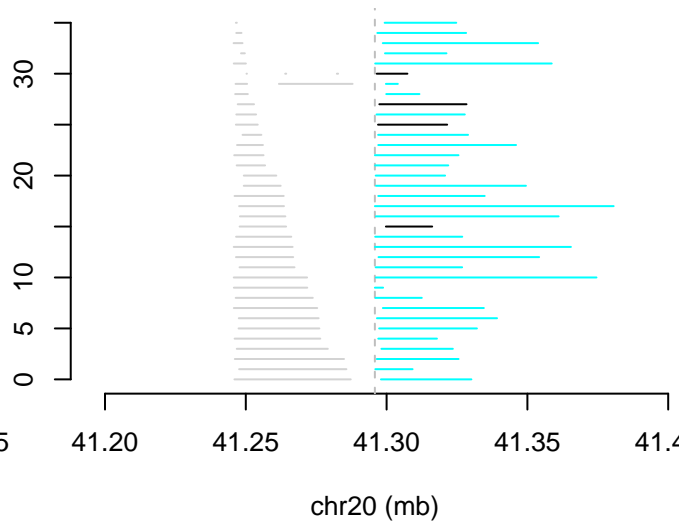

Copy number

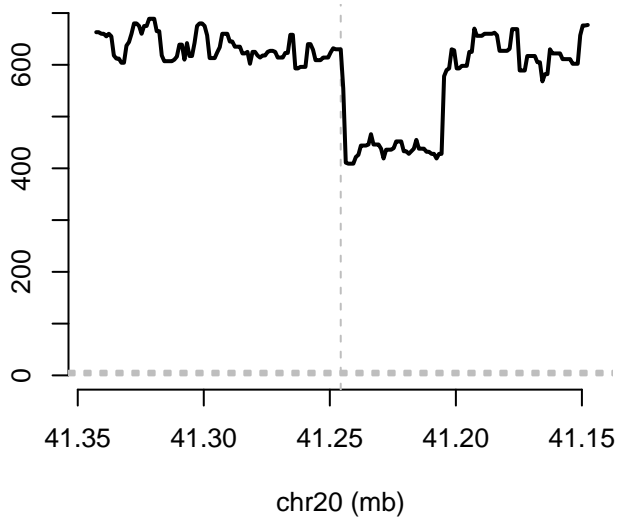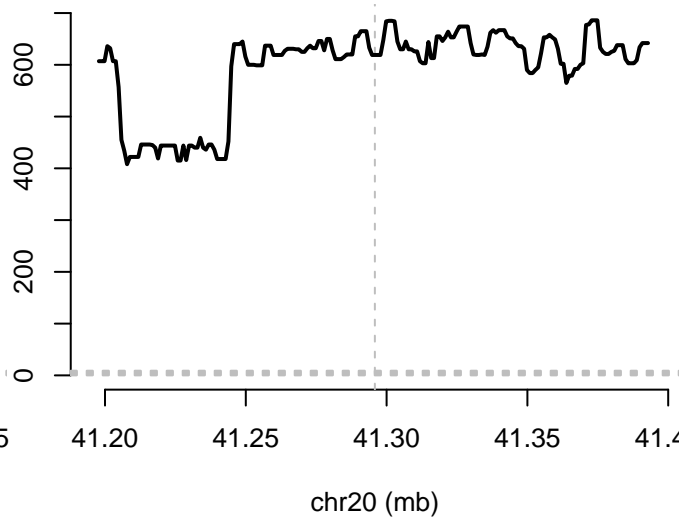

K562 chr20:41,245,668::chr20:41,295,836--

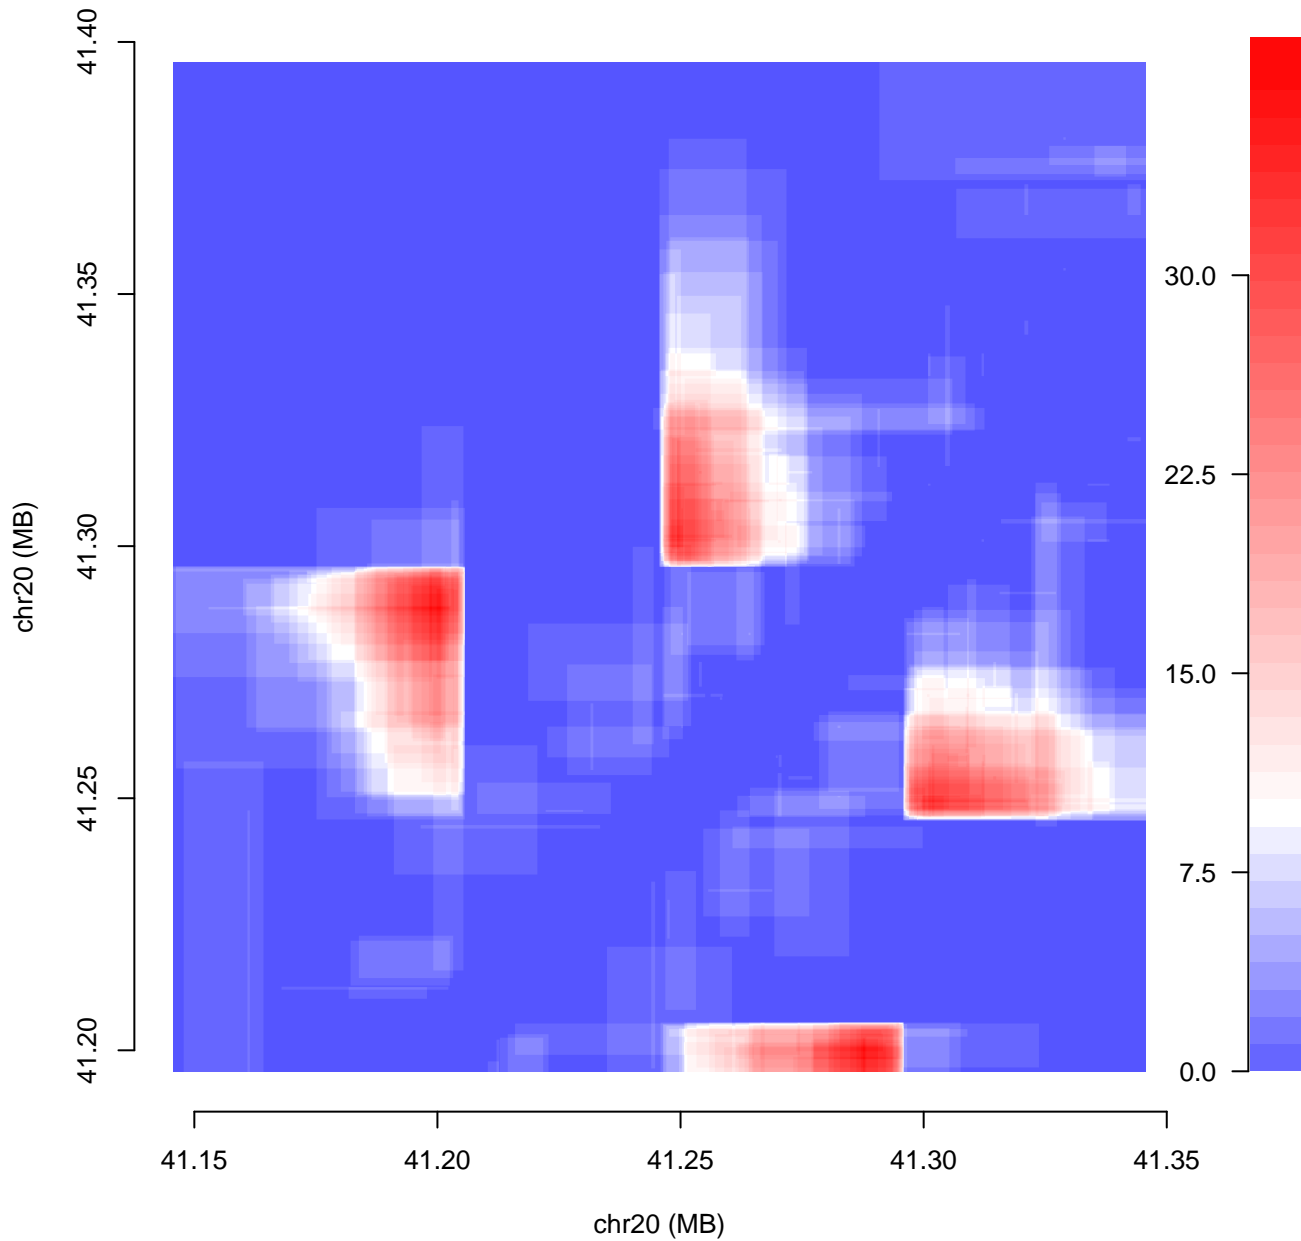

Supplement: Supplemental_Data.zip [file event_74.pdf › event_74.pdf]

Barcode

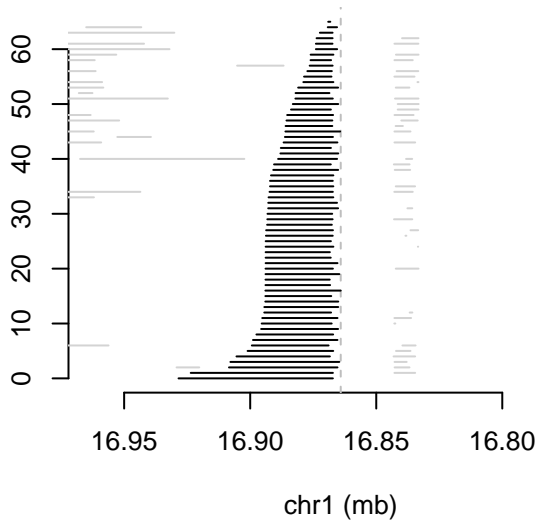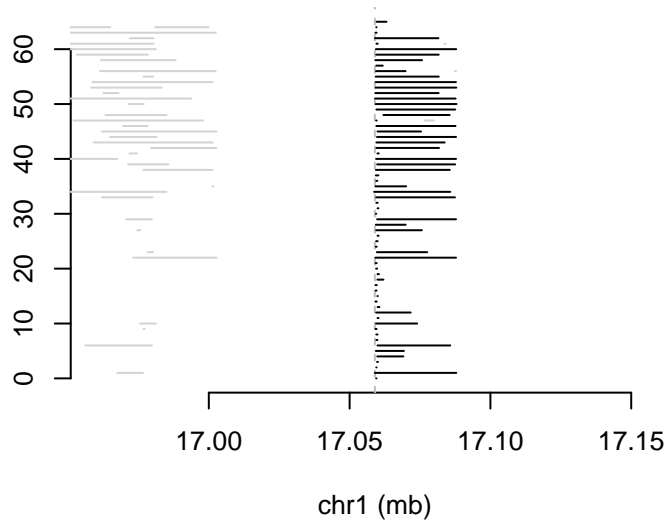

Copy number

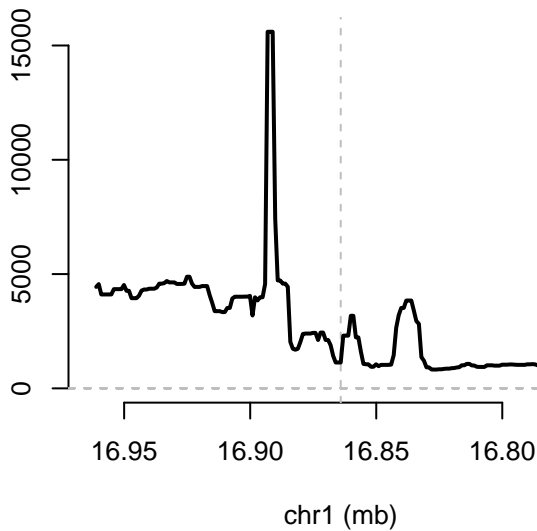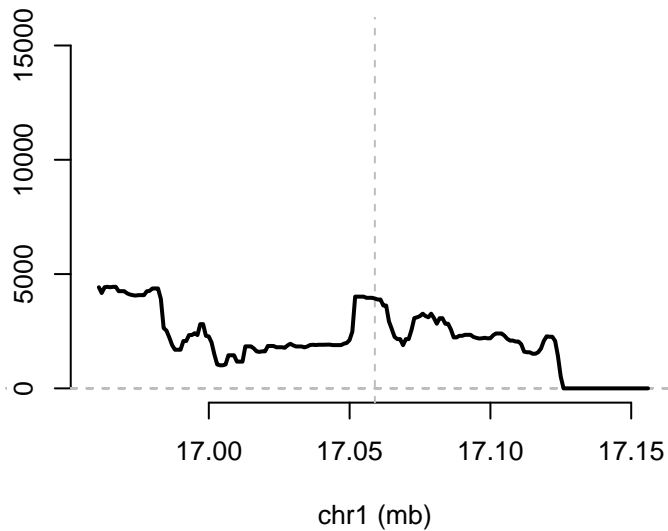

K562 chr1:17,058,973::chr1:16,864,081--

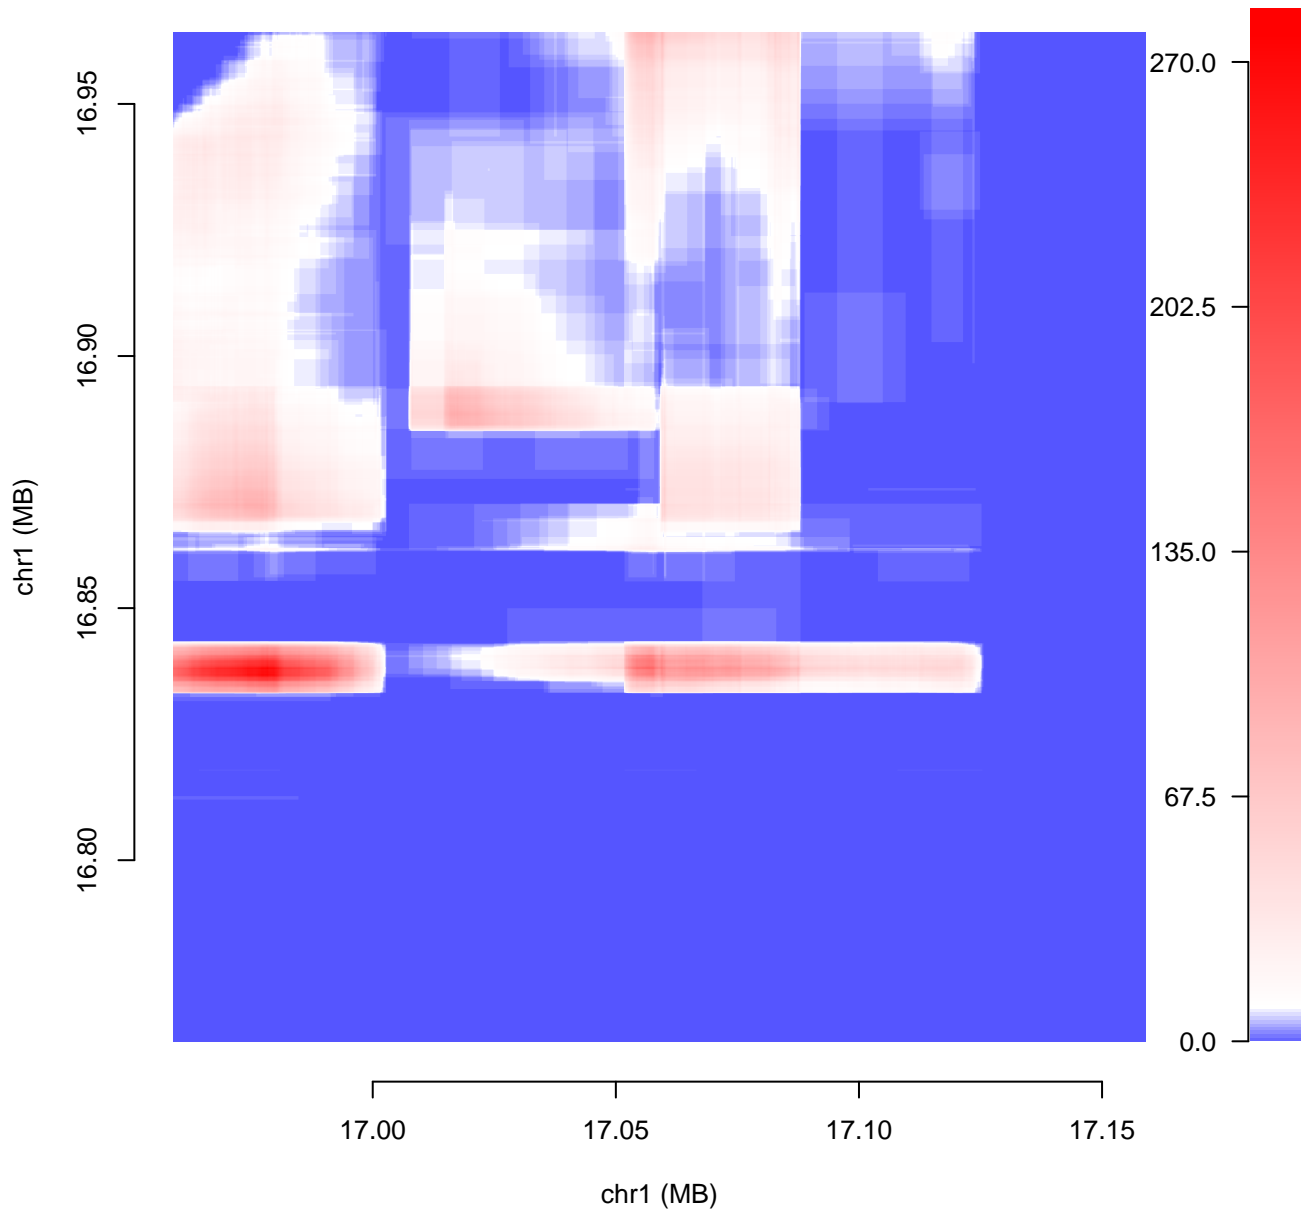

Supplement: Supplemental_Data.zip [file event_75.pdf › event_75.pdf]

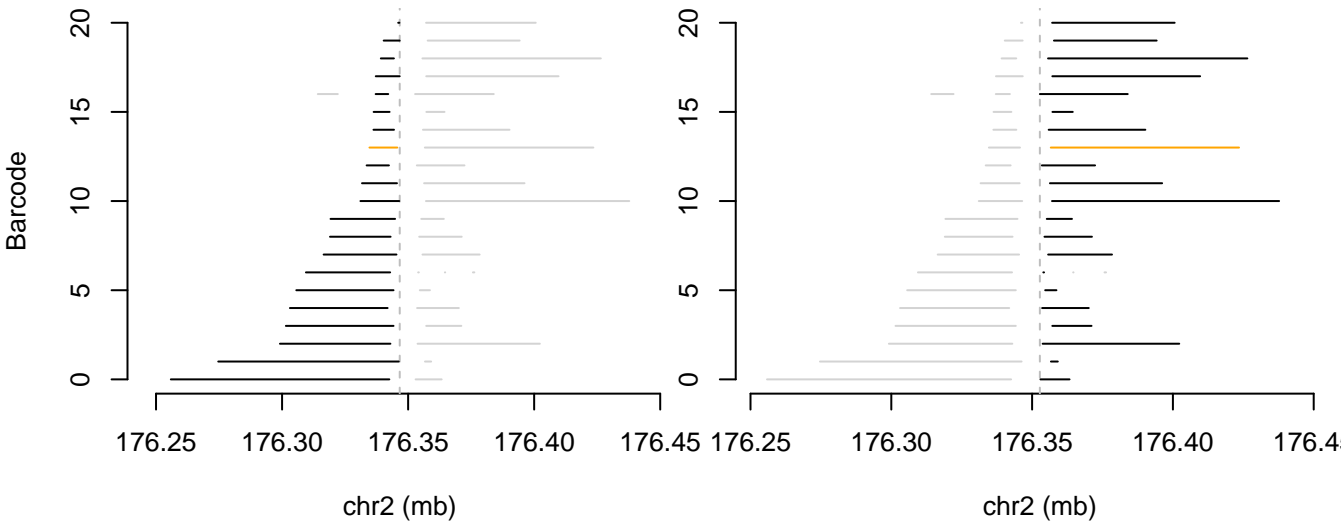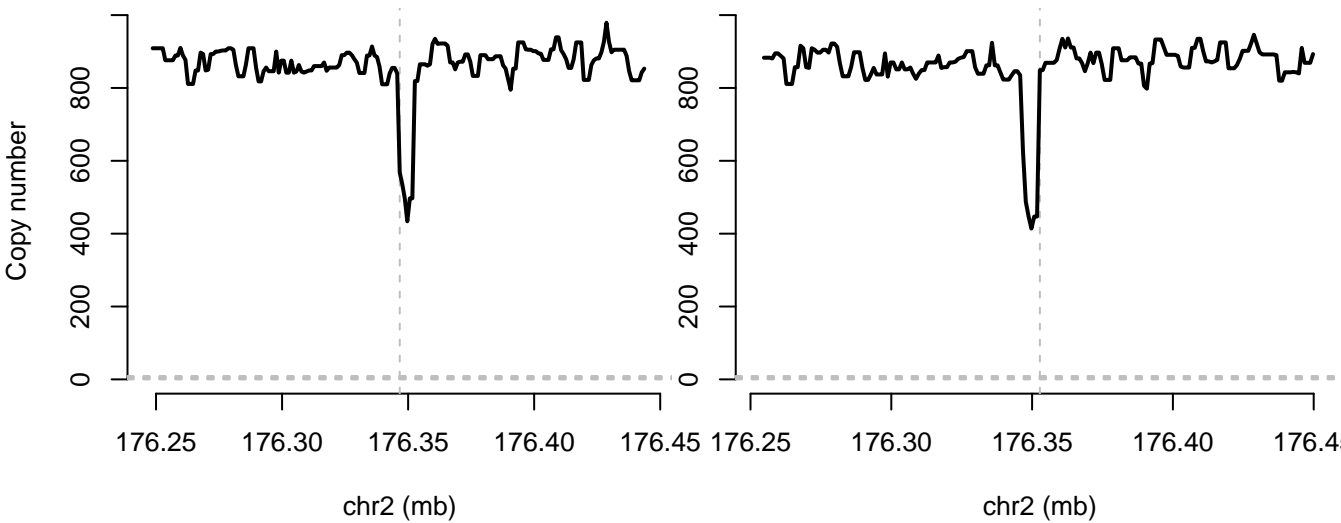

K562 chr2:176,352,761::chr2:176,346,675--+

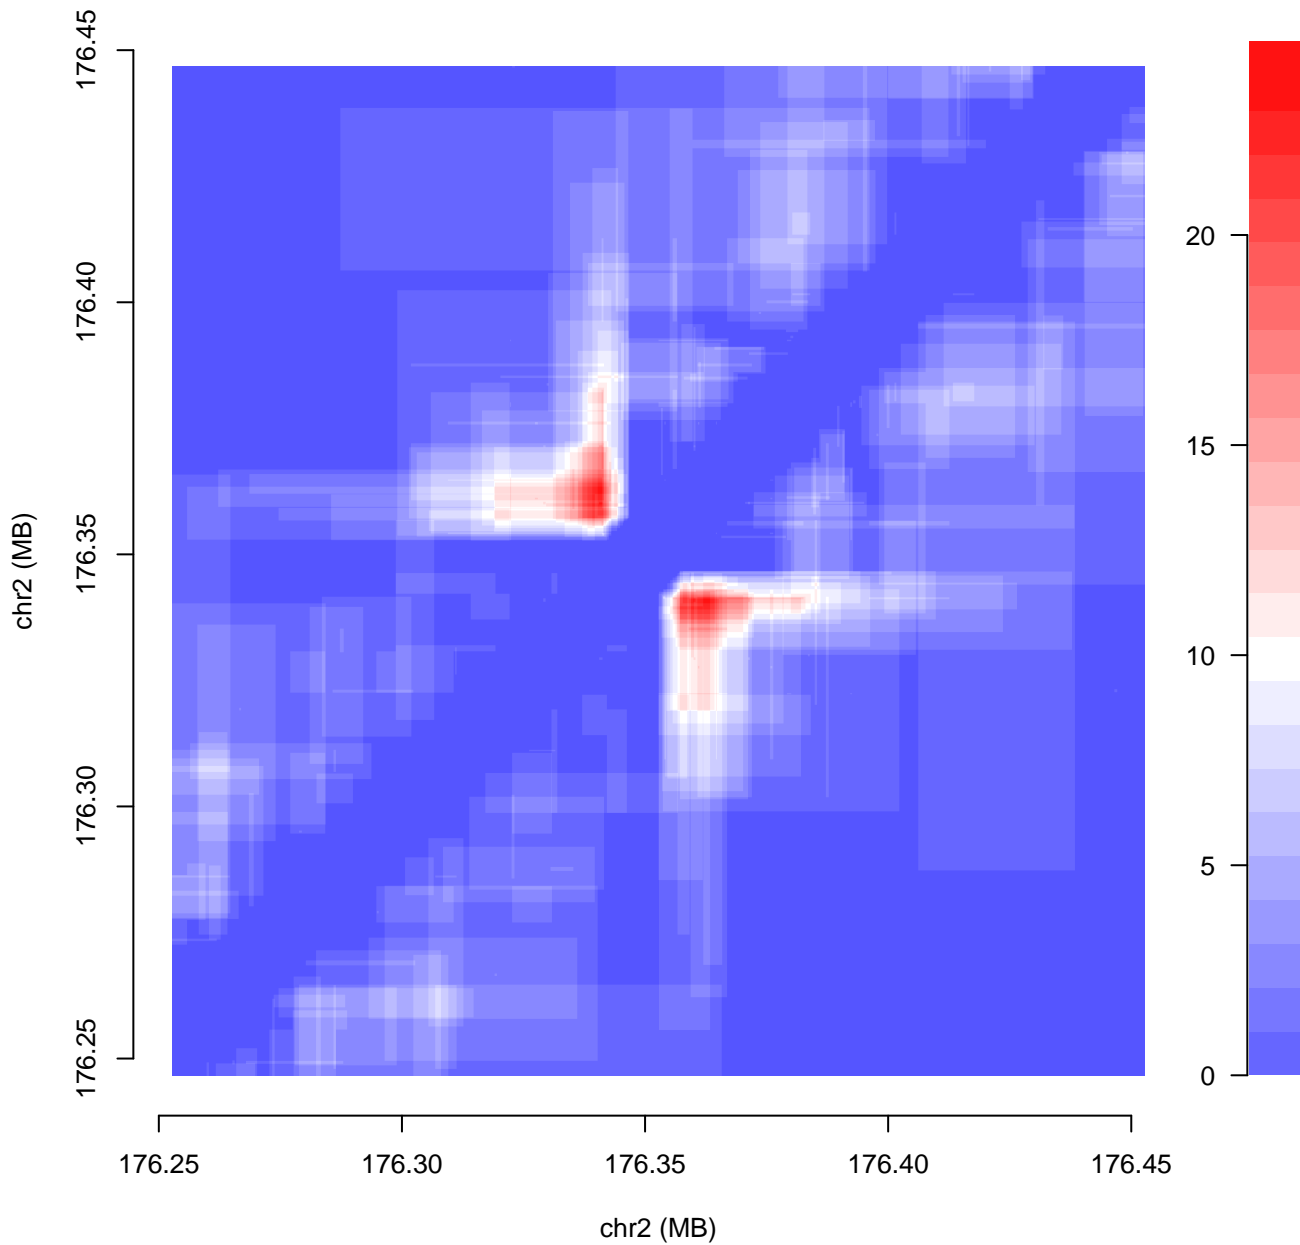

Supplement: Supplemental_Data.zip [file event_76.pdf › event_76.pdf]

Barcode

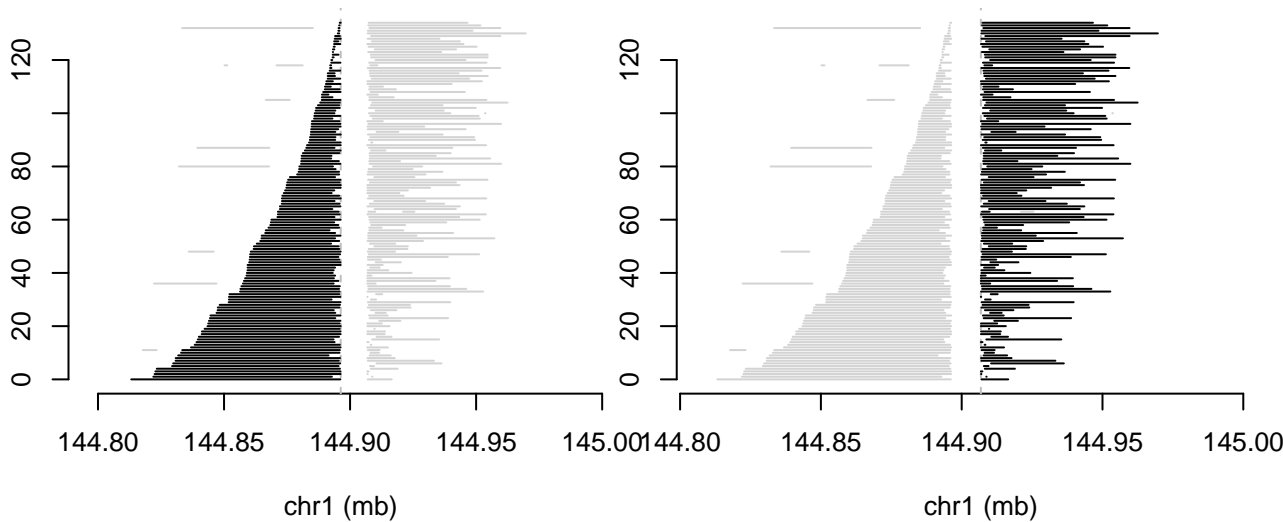

Copy number

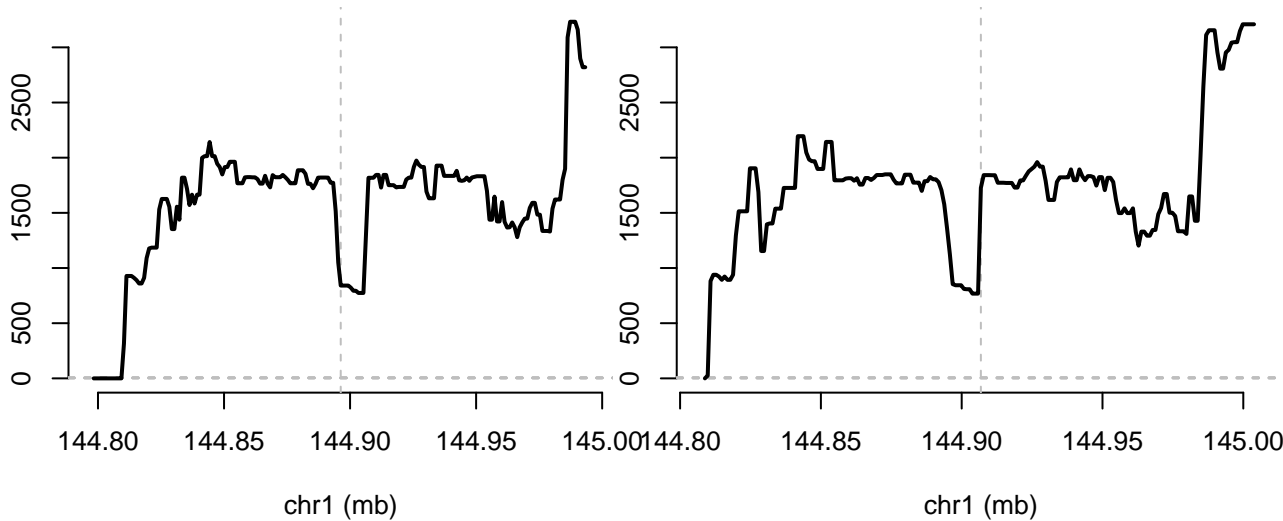

K562 chr1:144,896,297::chr1:144,906,807+-

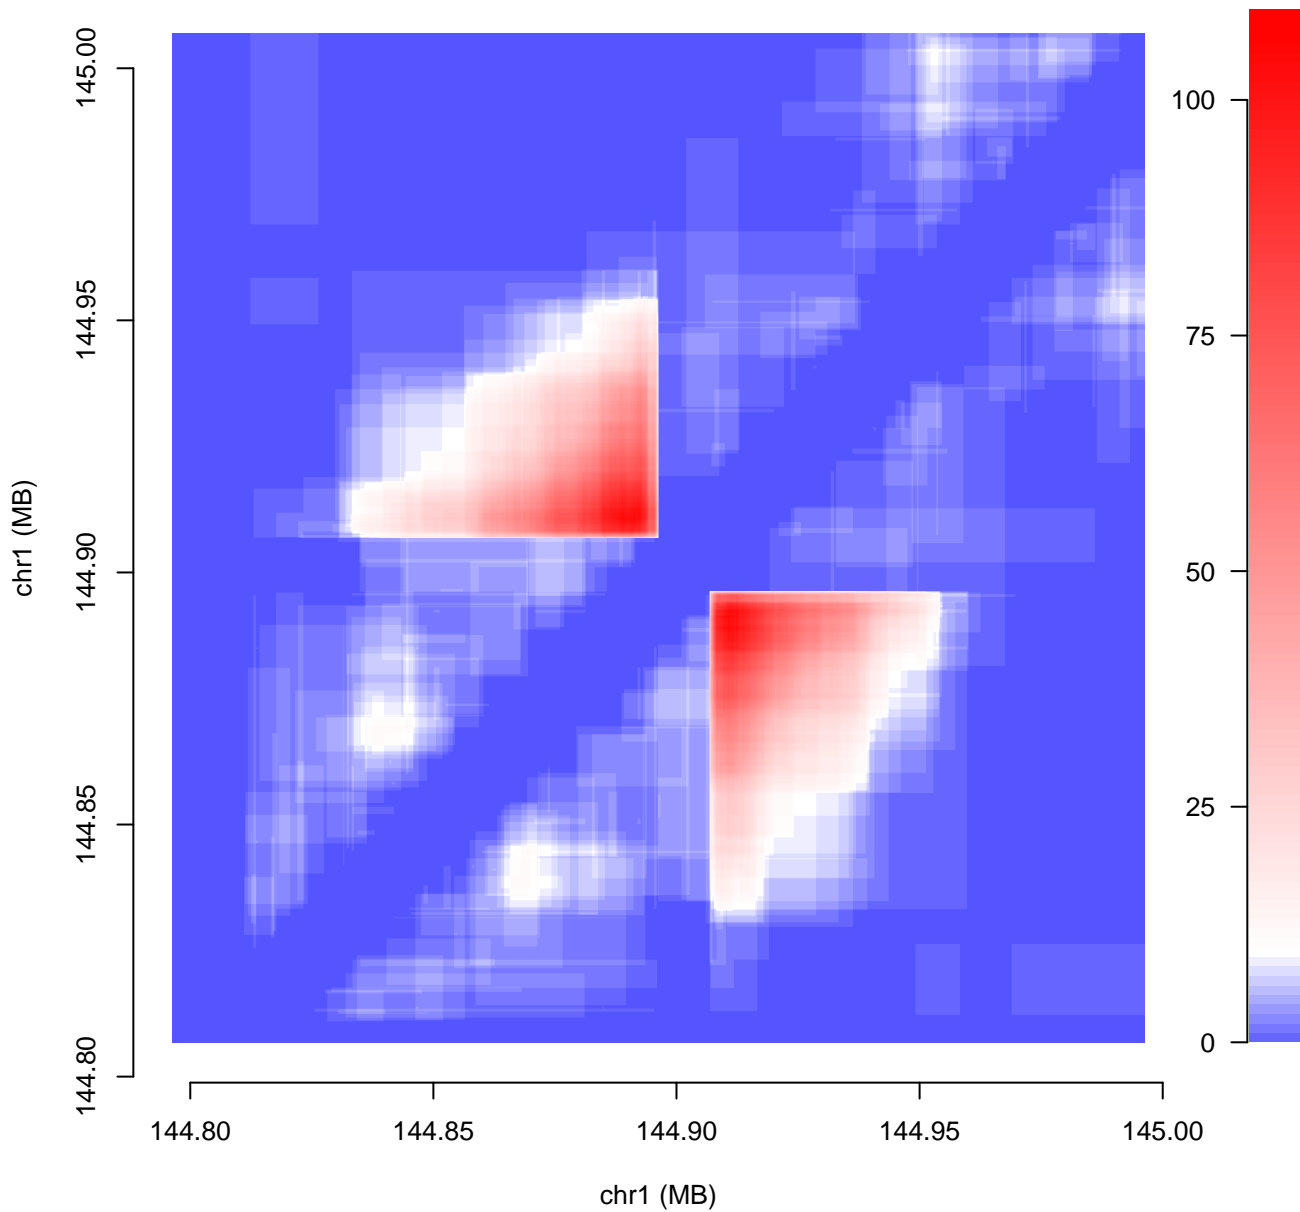

Supplement: Supplemental_Data.zip [file event_77.pdf › event_77.pdf]

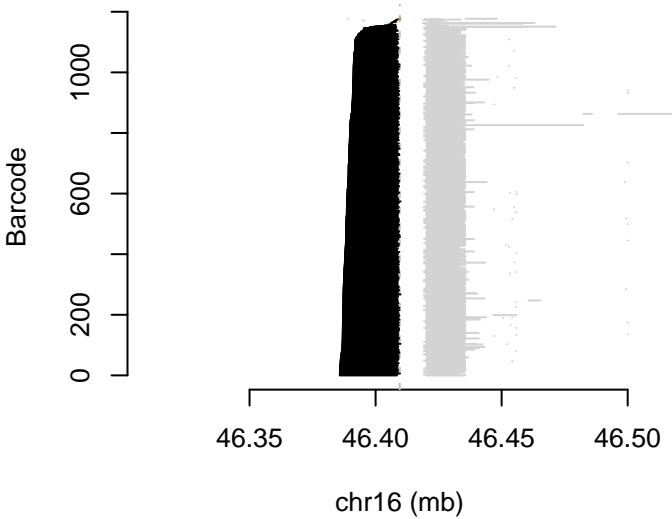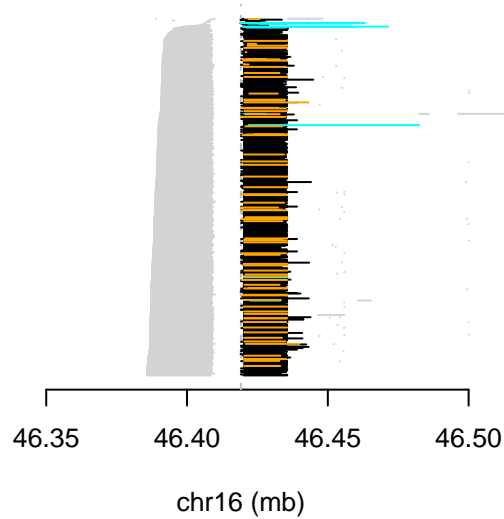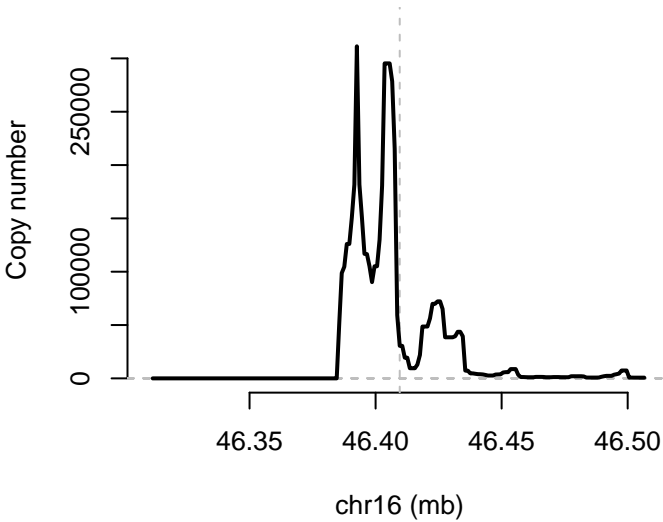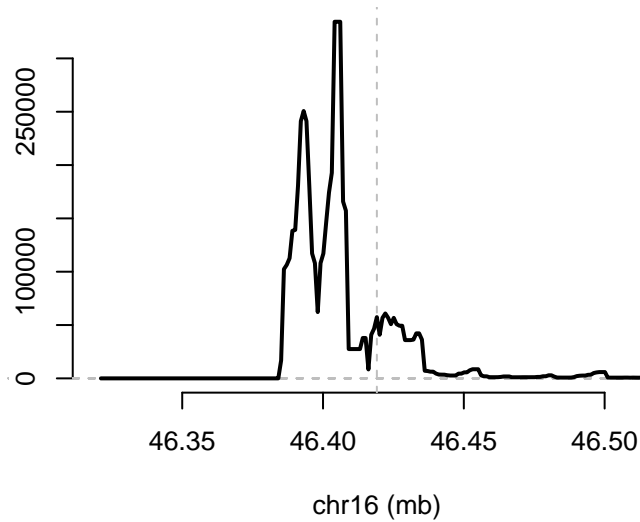

K562 chr16:46,409,580::chr16:46,419,125+-

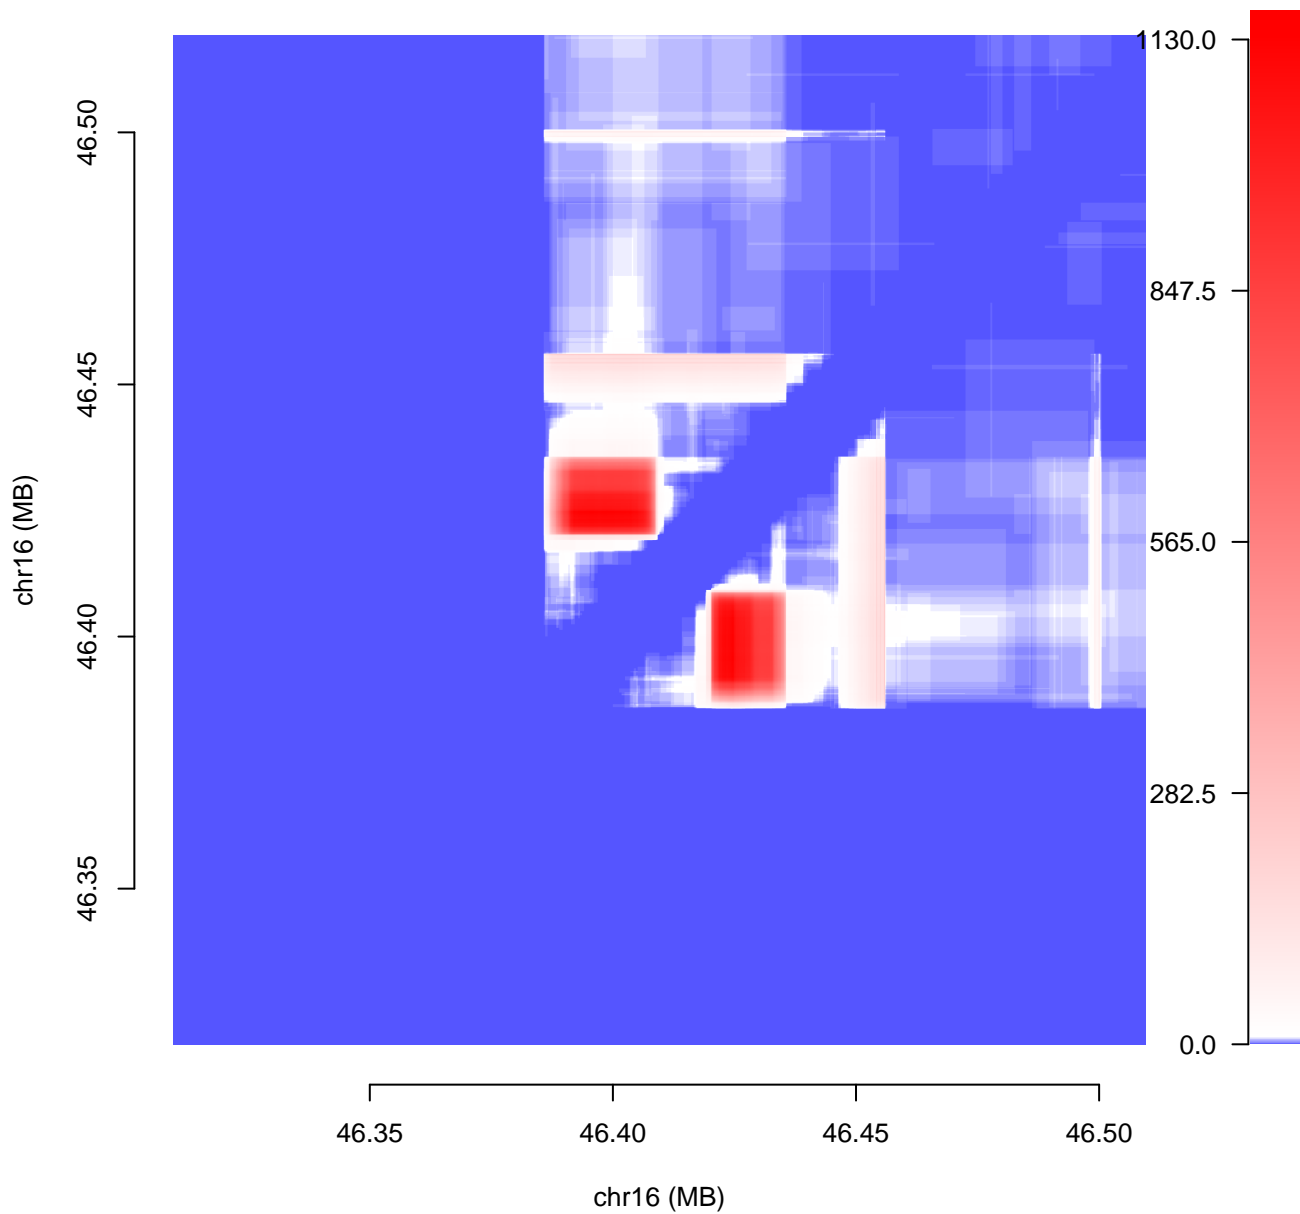

Supplement: Supplemental_Data.zip [file event_78.pdf › event_78.pdf]

Barcode

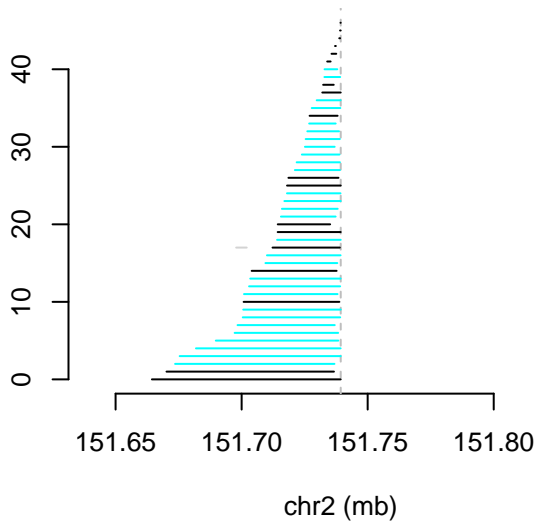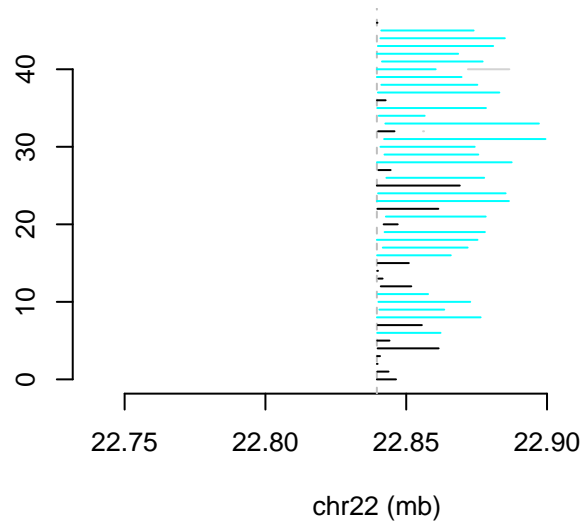

Copy number

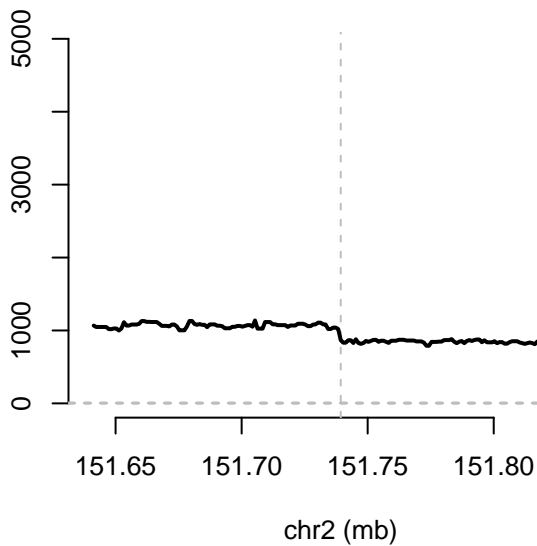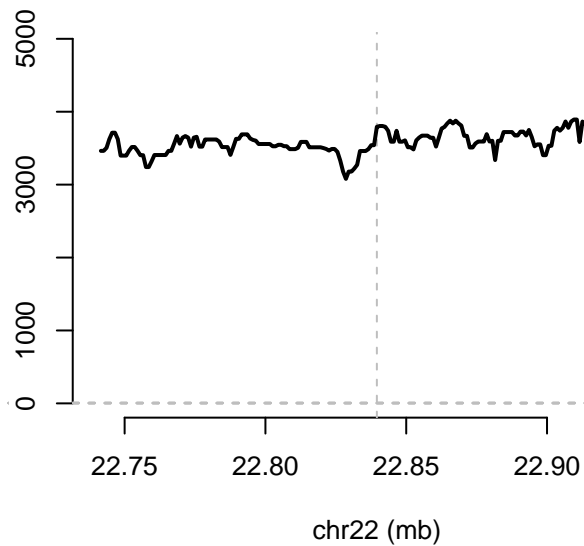

K562 chr22:22,839,580::chr2:151,739,317-+

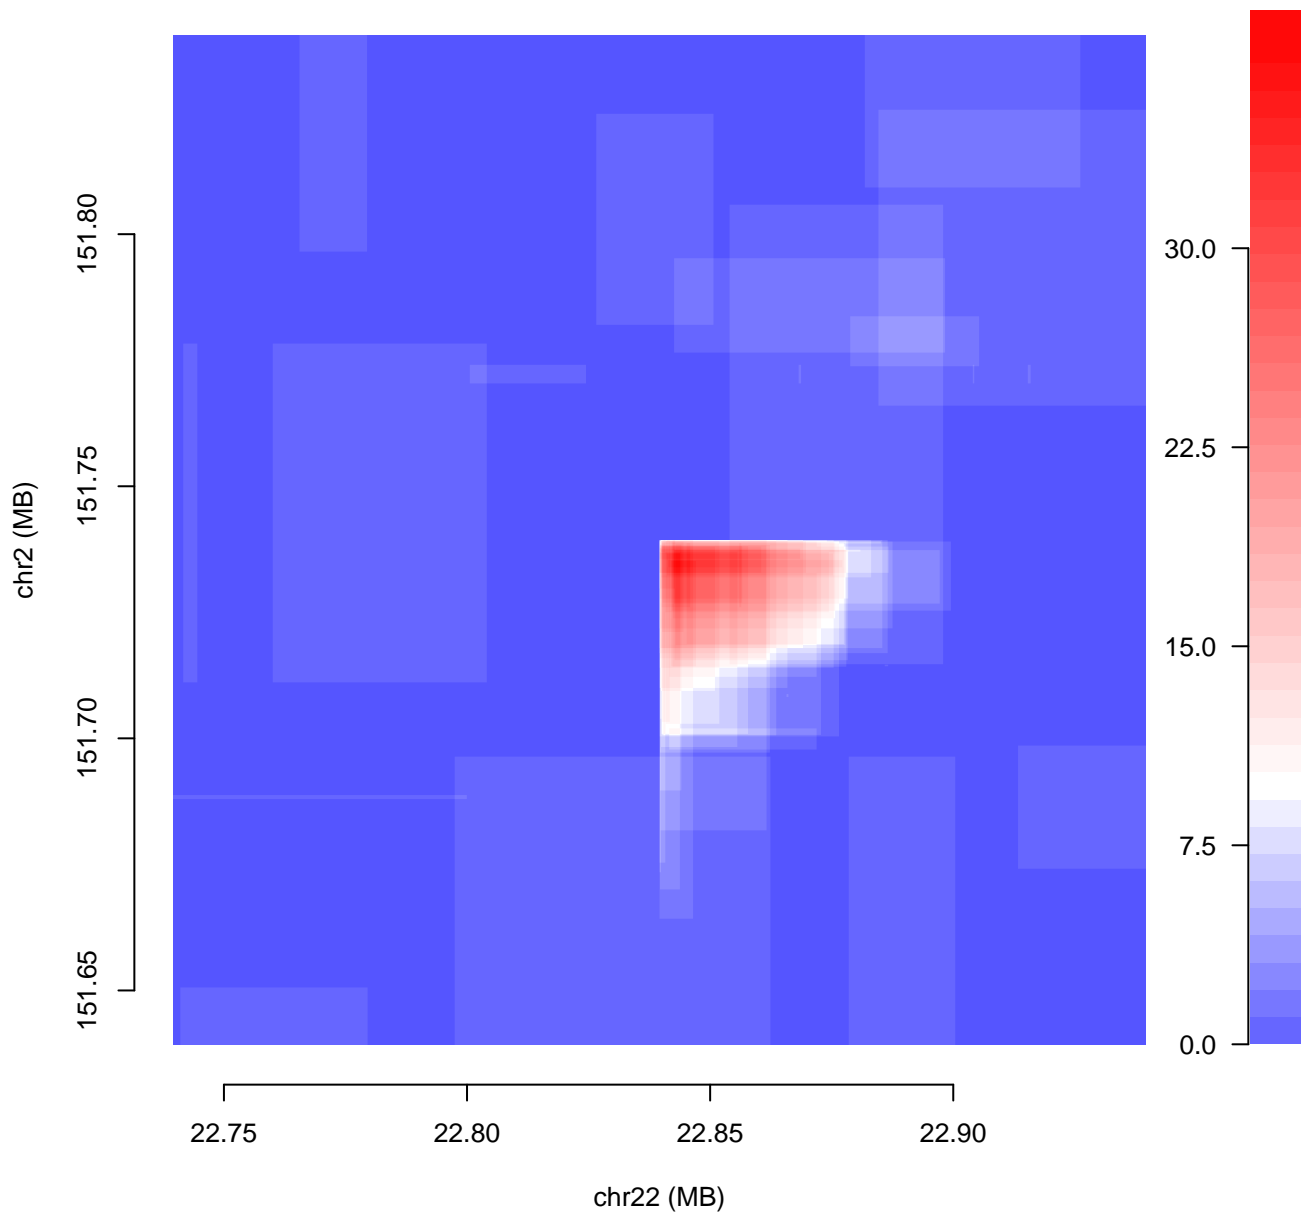

Supplement: Supplemental_Data.zip [file event_79.pdf › event_79.pdf]

Barcode

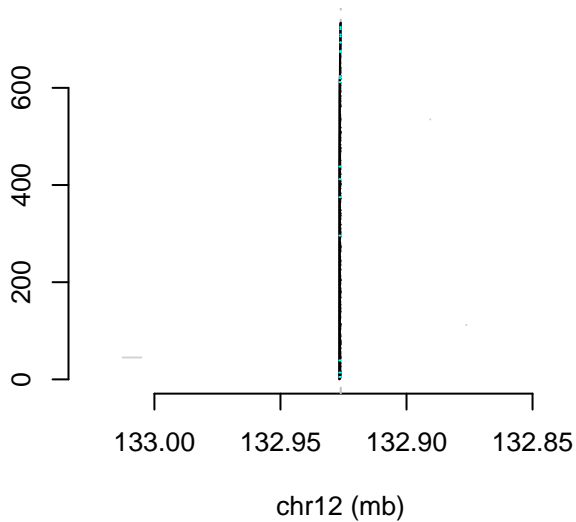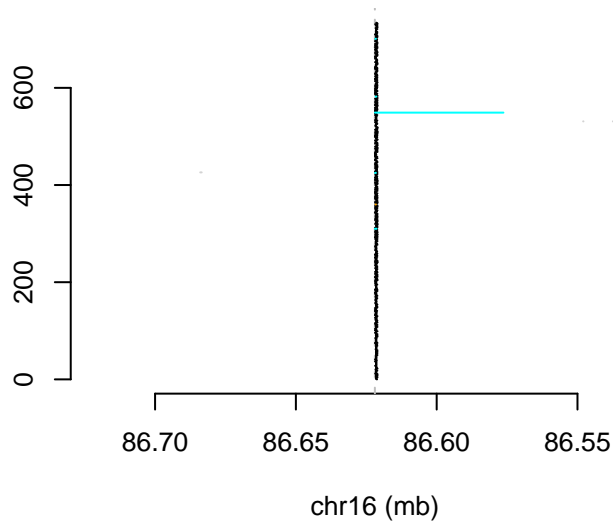

Copy number

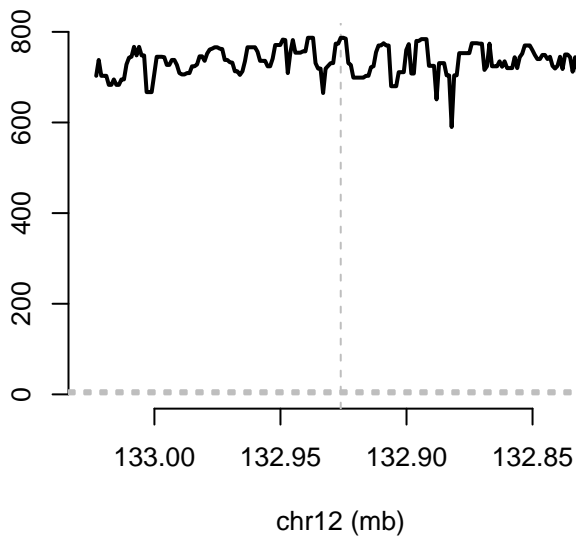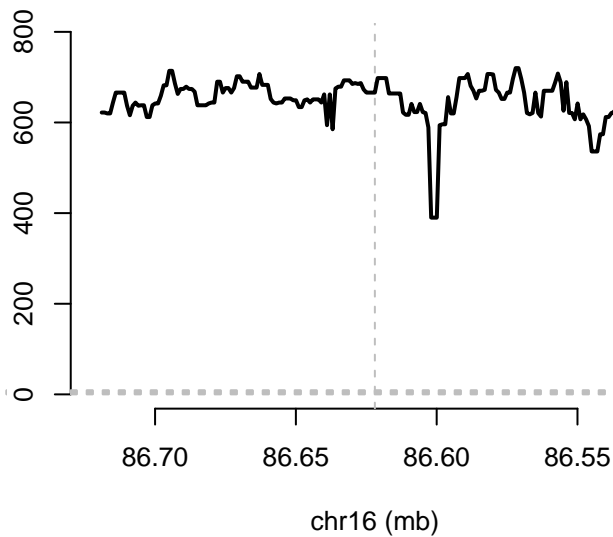

K562 chr16:86,621,951::chr12:132,926,089+-

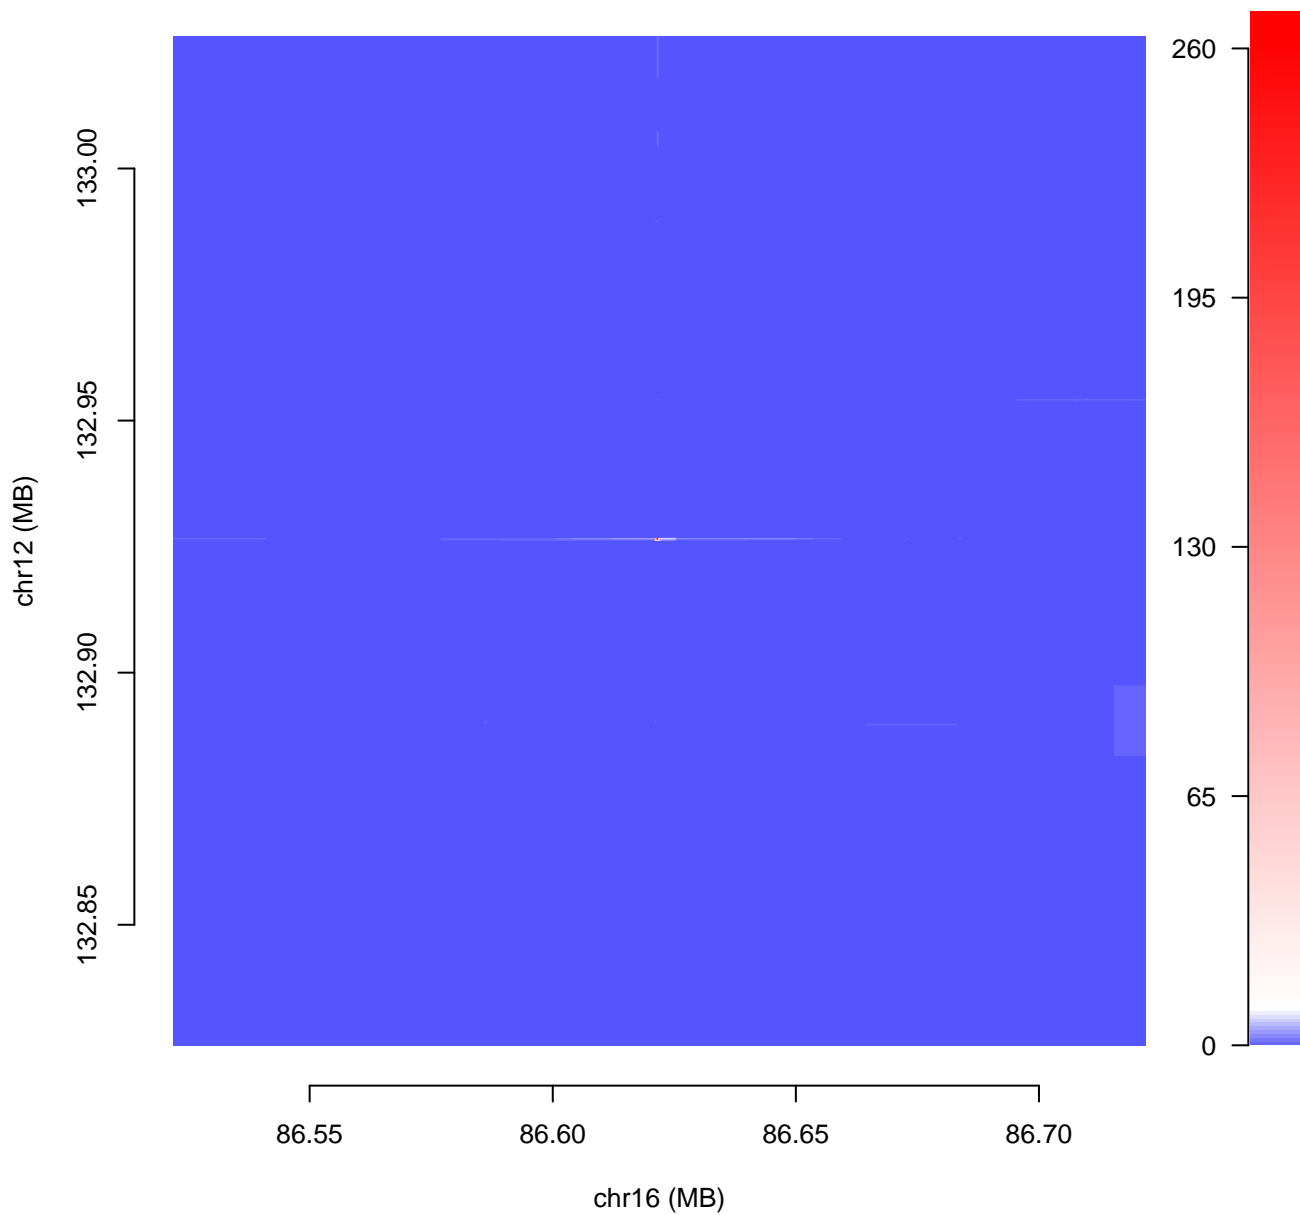

Supplement: Supplemental_Data.zip [file event_8.pdf › event_8.pdf]

Barcode

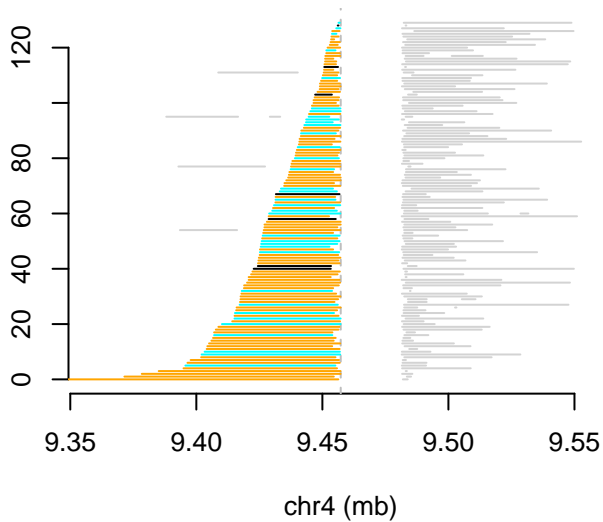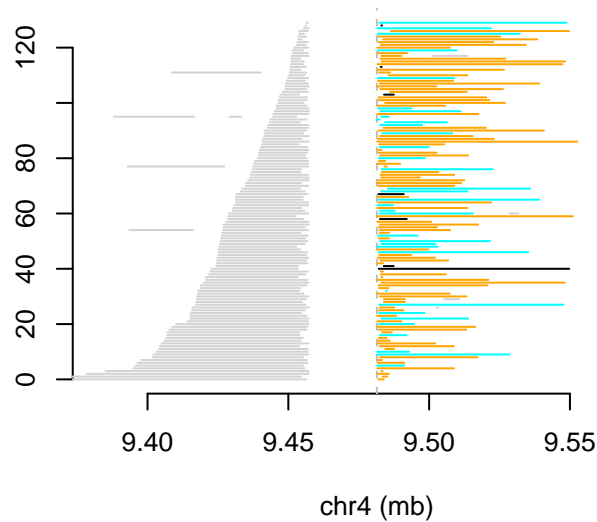

Copy number

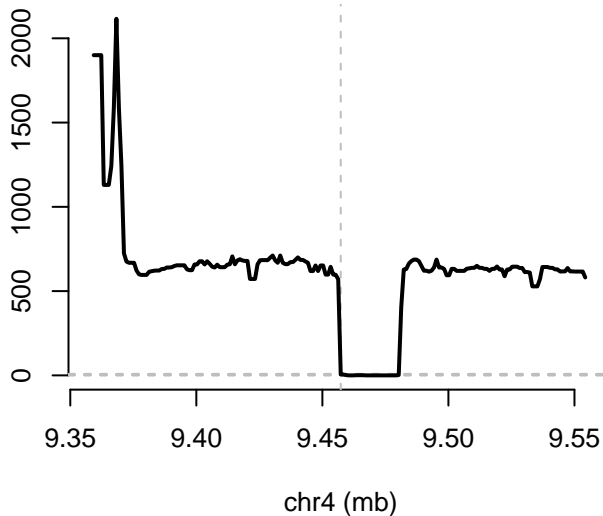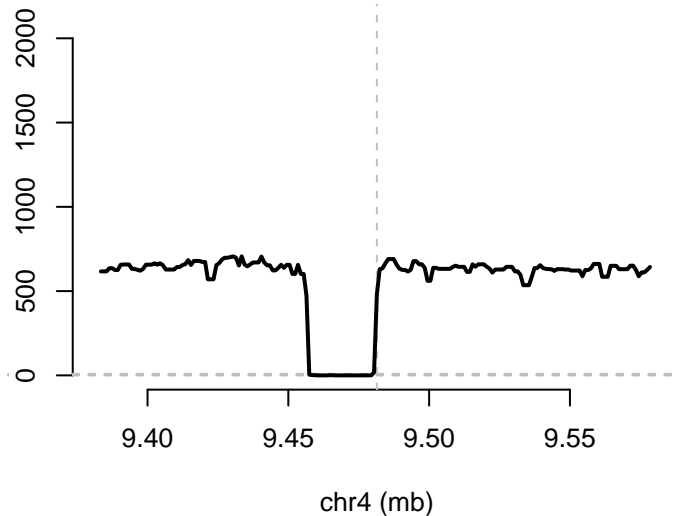

K562 chr4:9,457,285::chr4:9,481,444+-

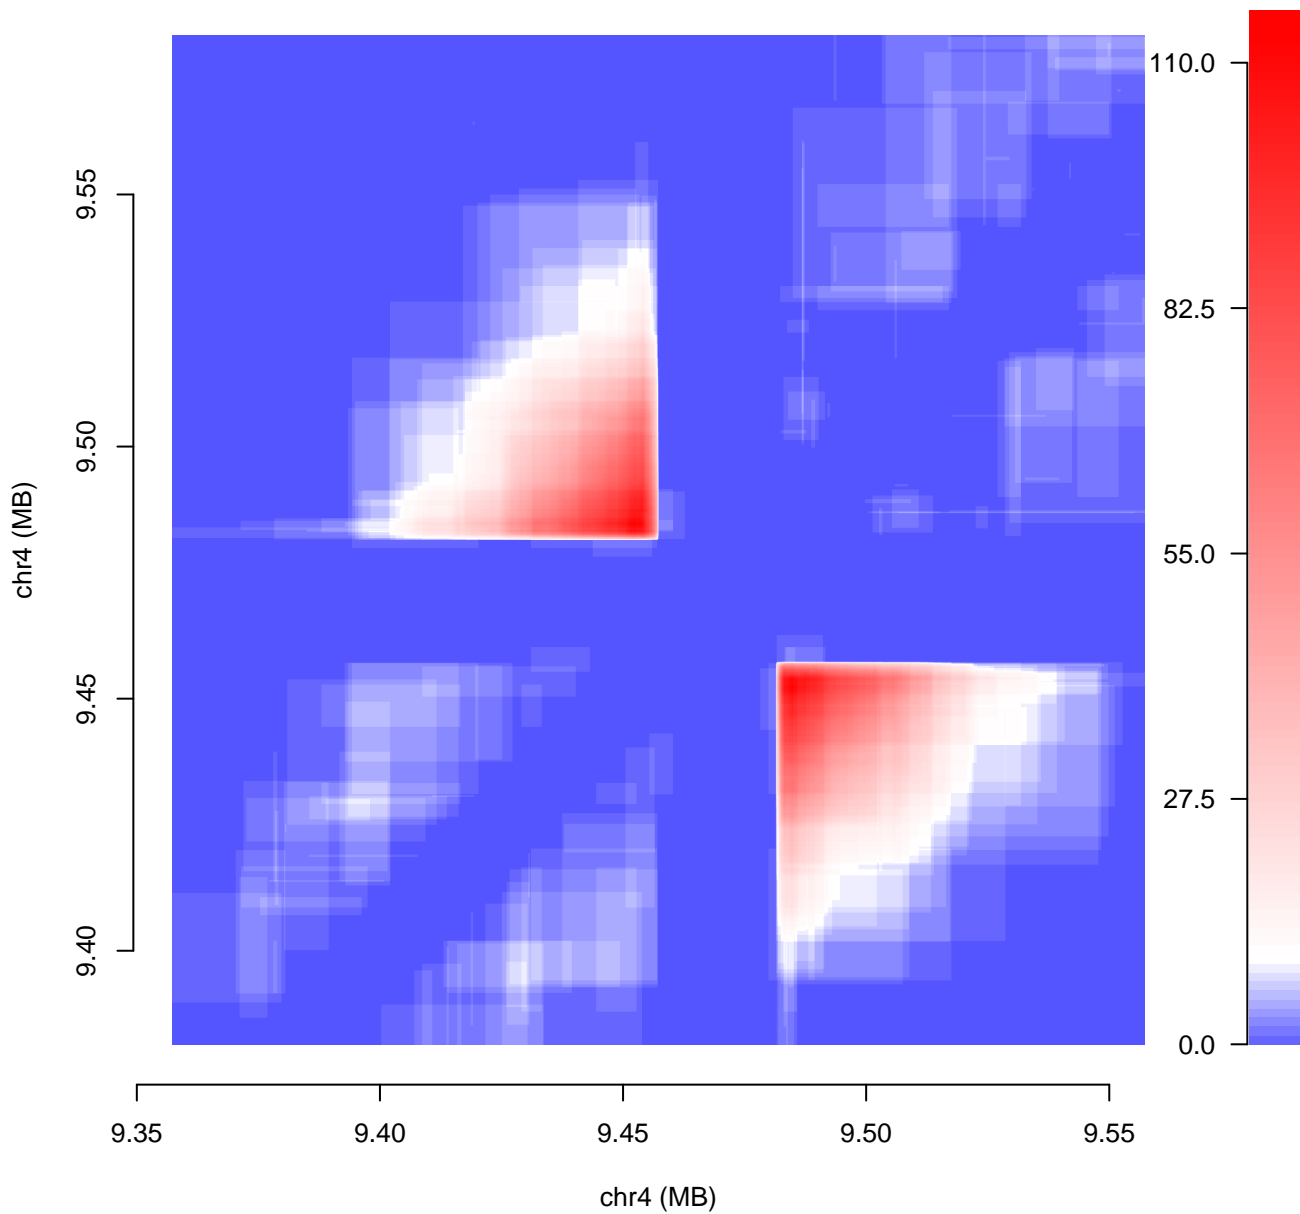

Supplement: Supplemental_Data.zip [file event_80.pdf › event_80.pdf]

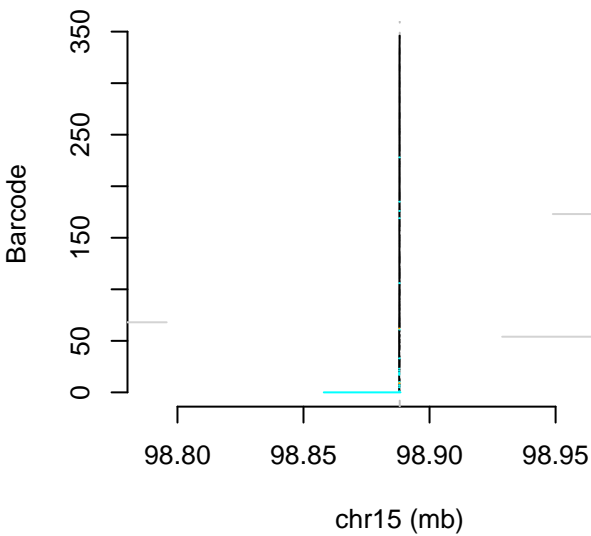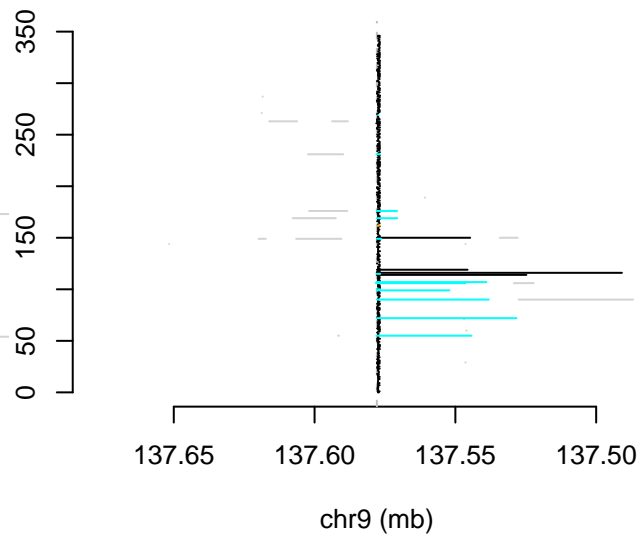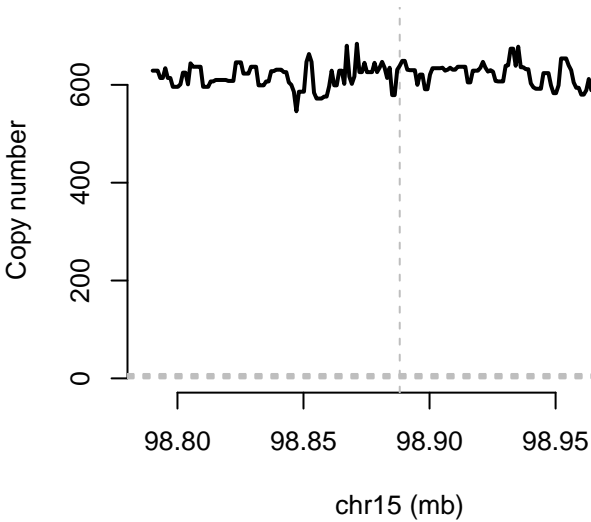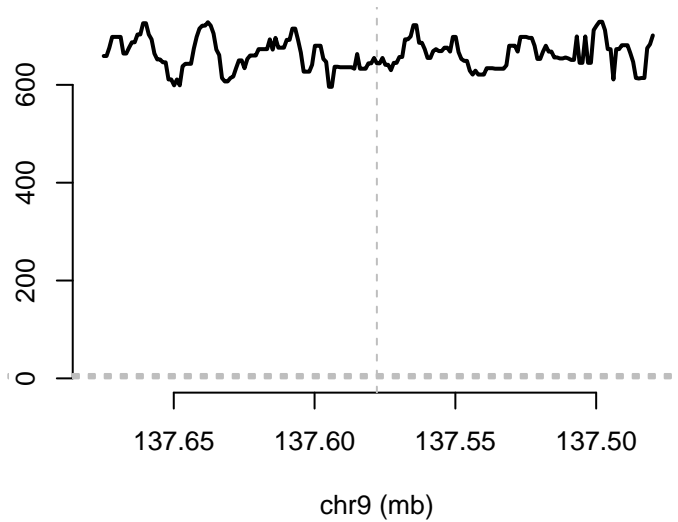

K562 chr15:98,888,177::chr9:137,577,877++

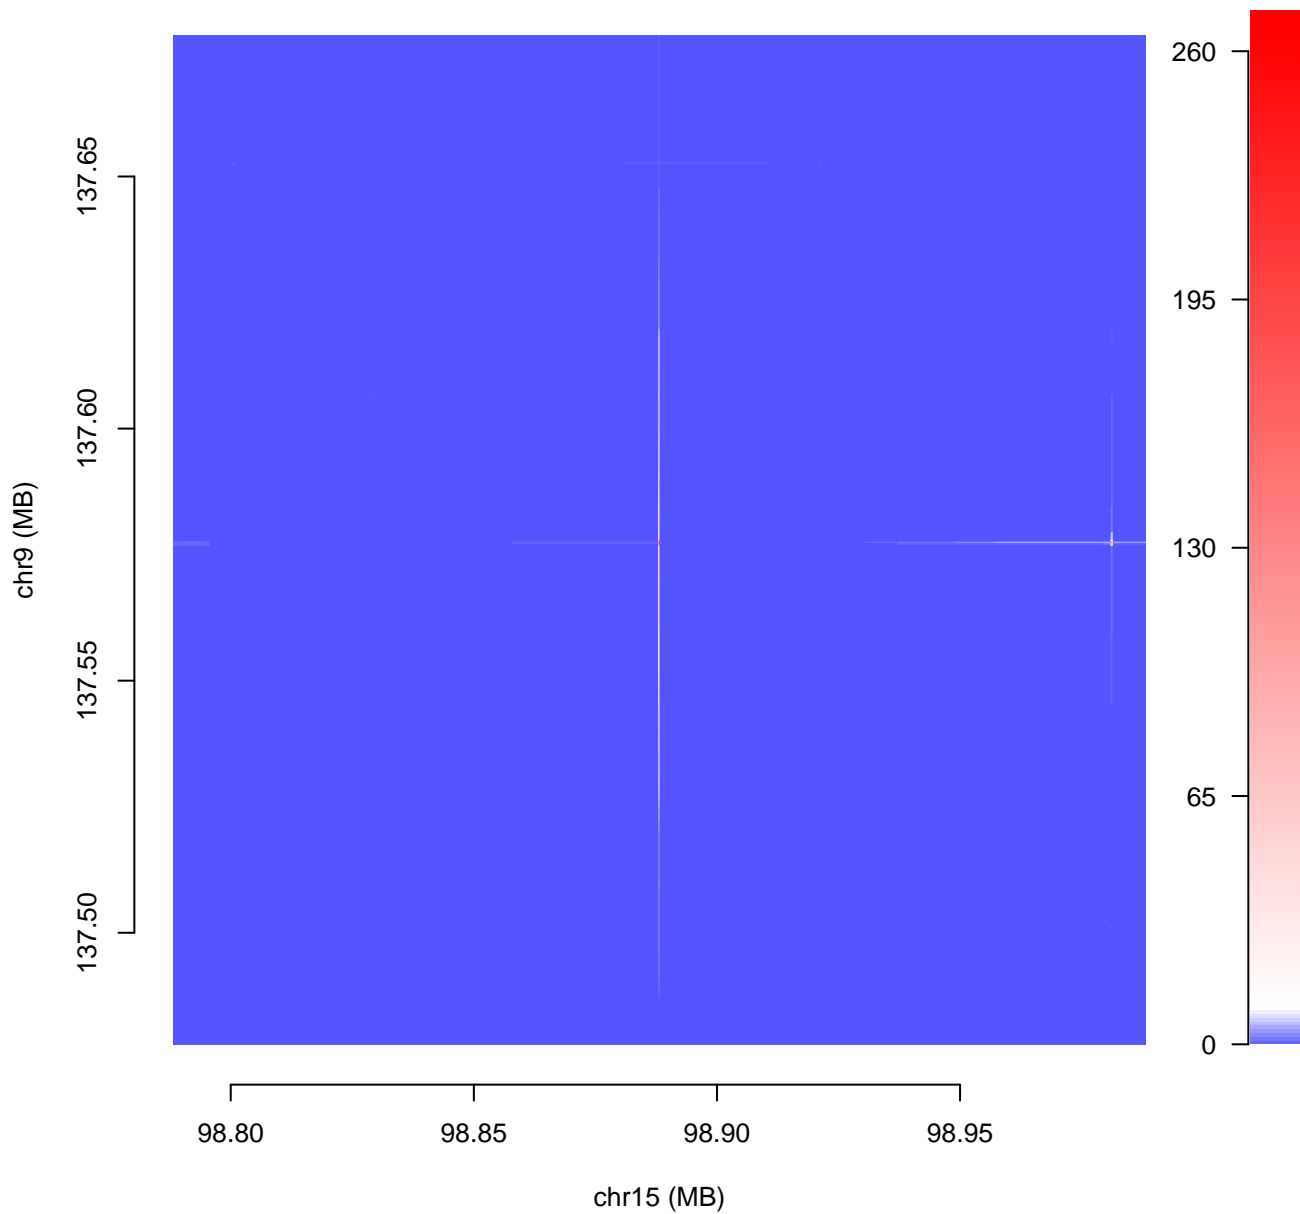

Supplement: Supplemental_Data.zip [file event_81.pdf › event_81.pdf]

Barcode

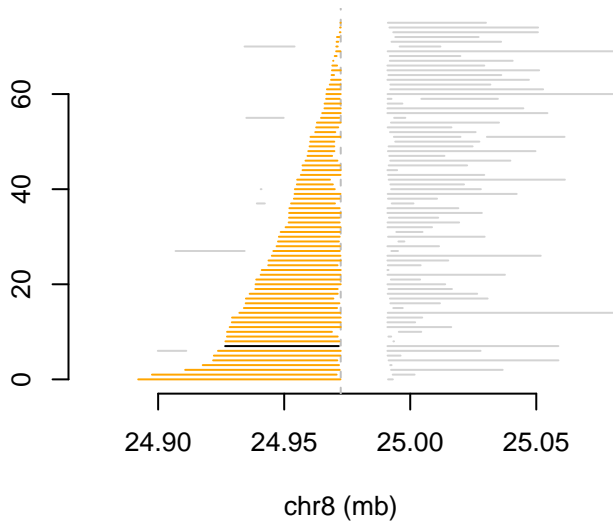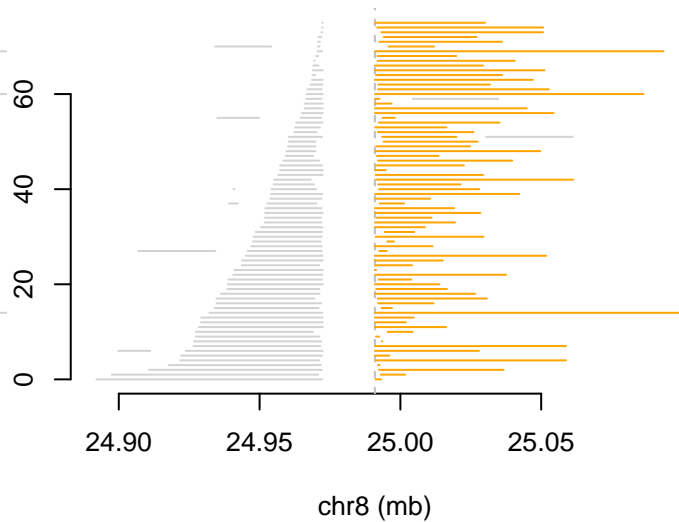

Copy number

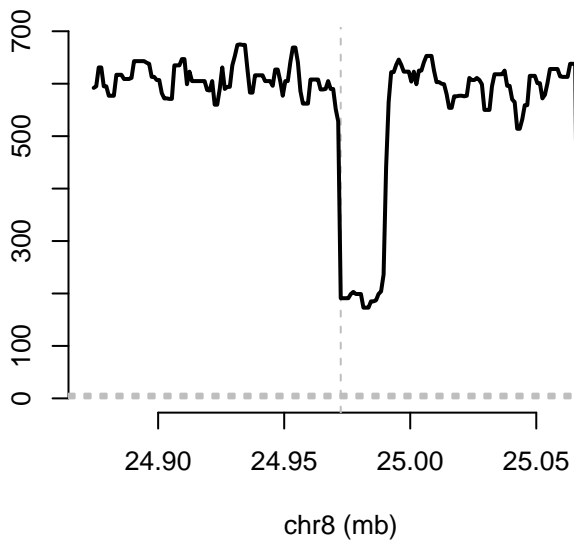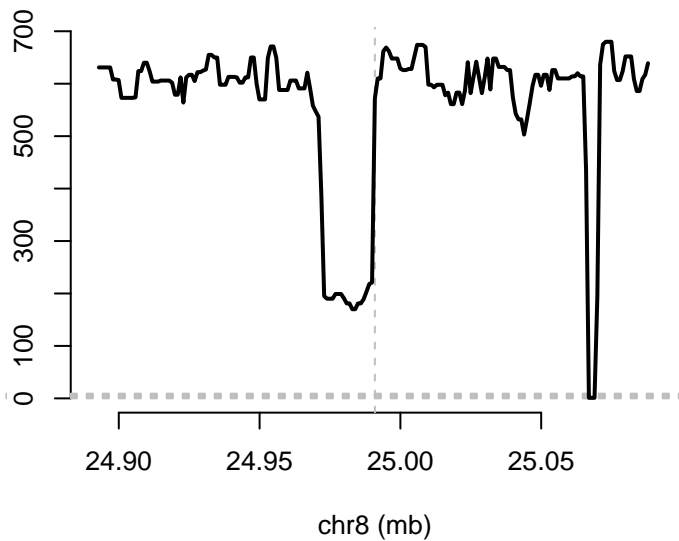

K562 chr8:24,990,943::chr8:24,972,434-+

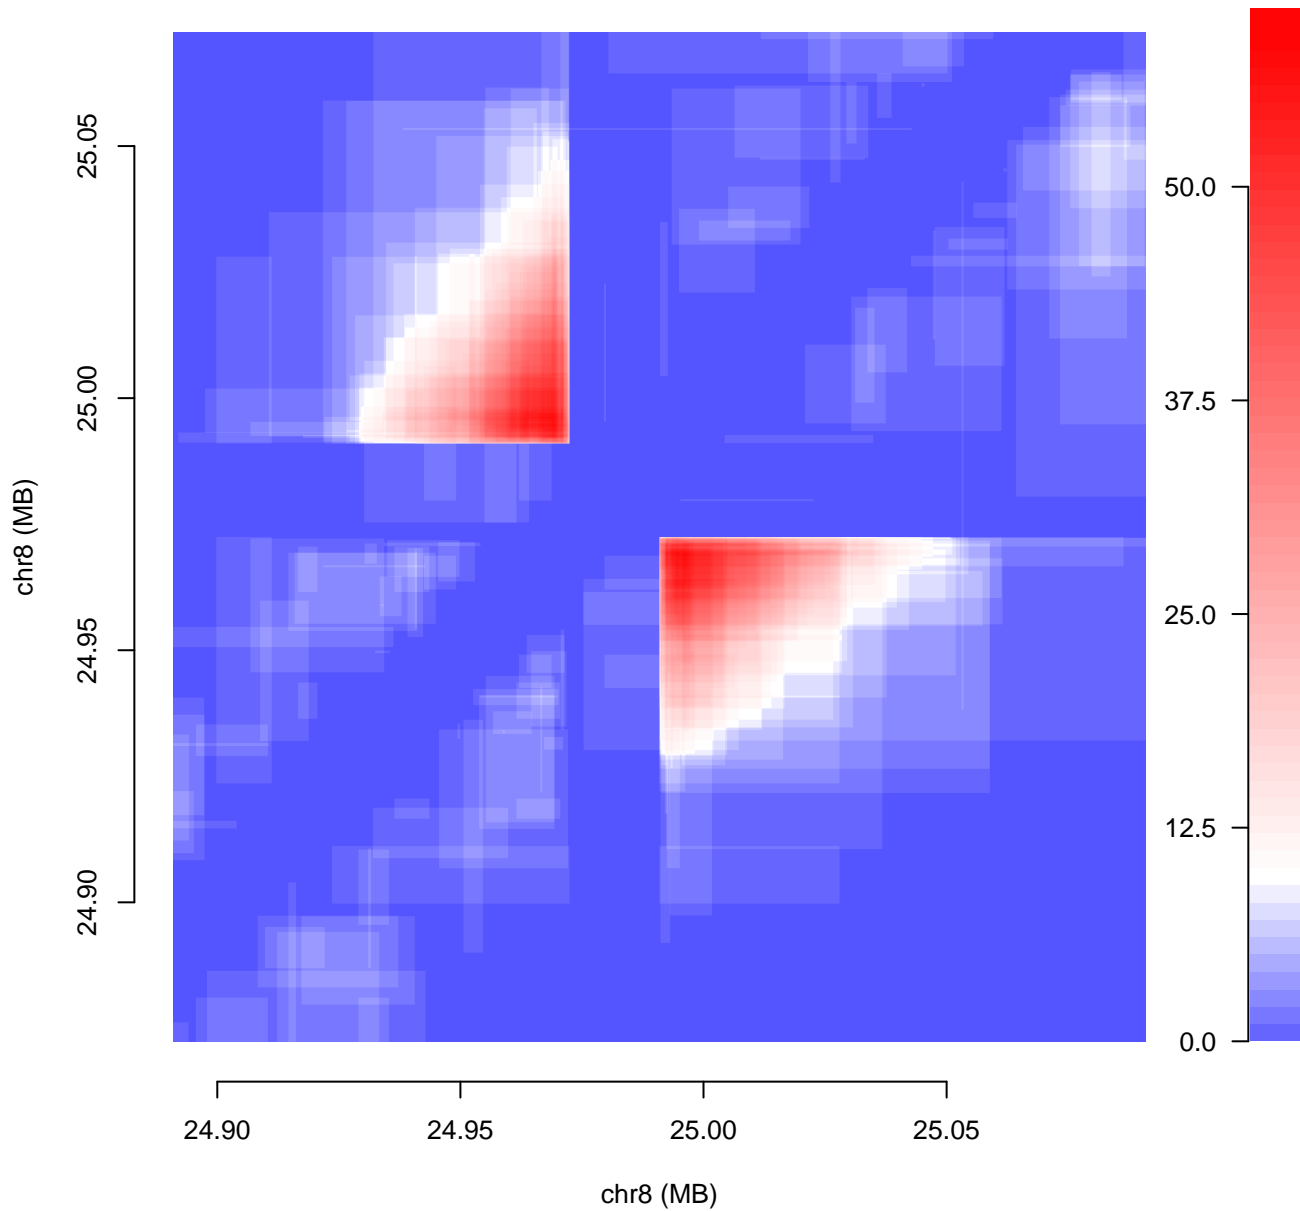

Supplement: Supplemental_Data.zip [file event_82.pdf › event_82.pdf]

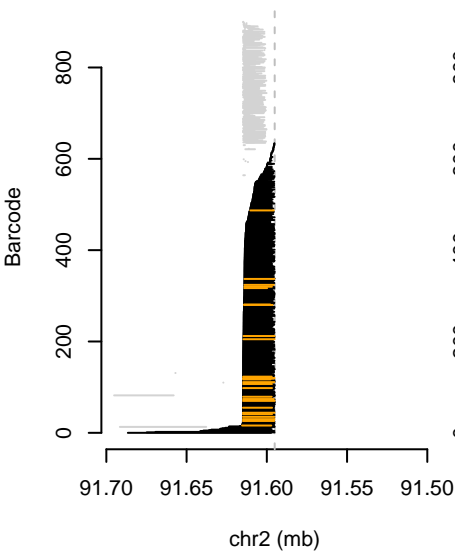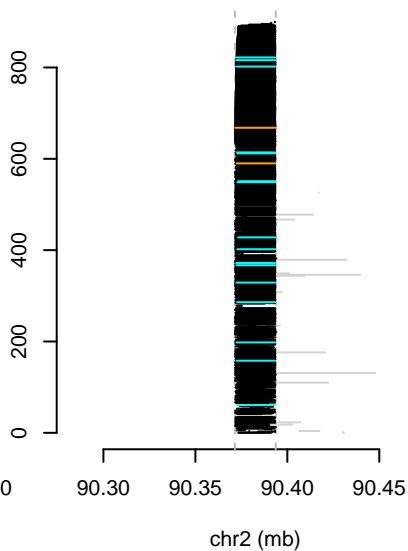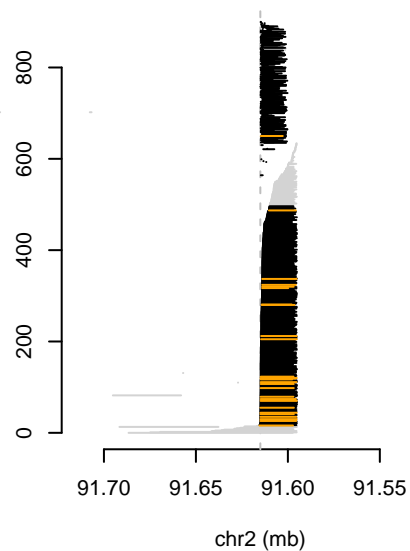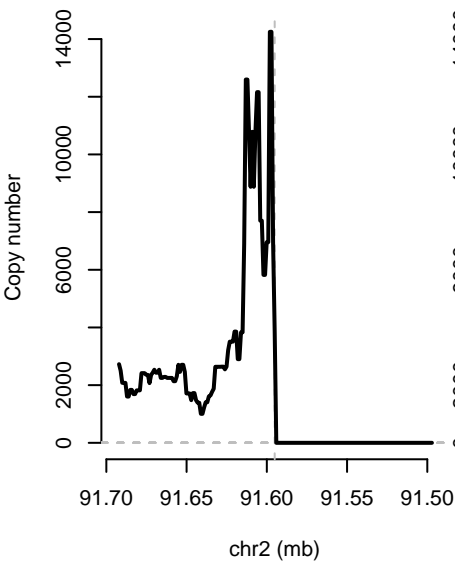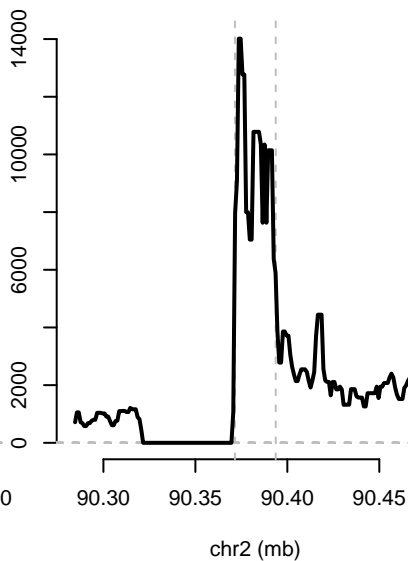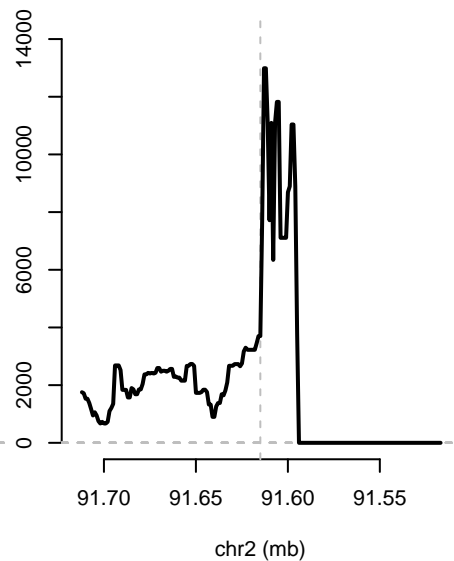

K562 chr2:91,595,098::chr2:90,371,524--

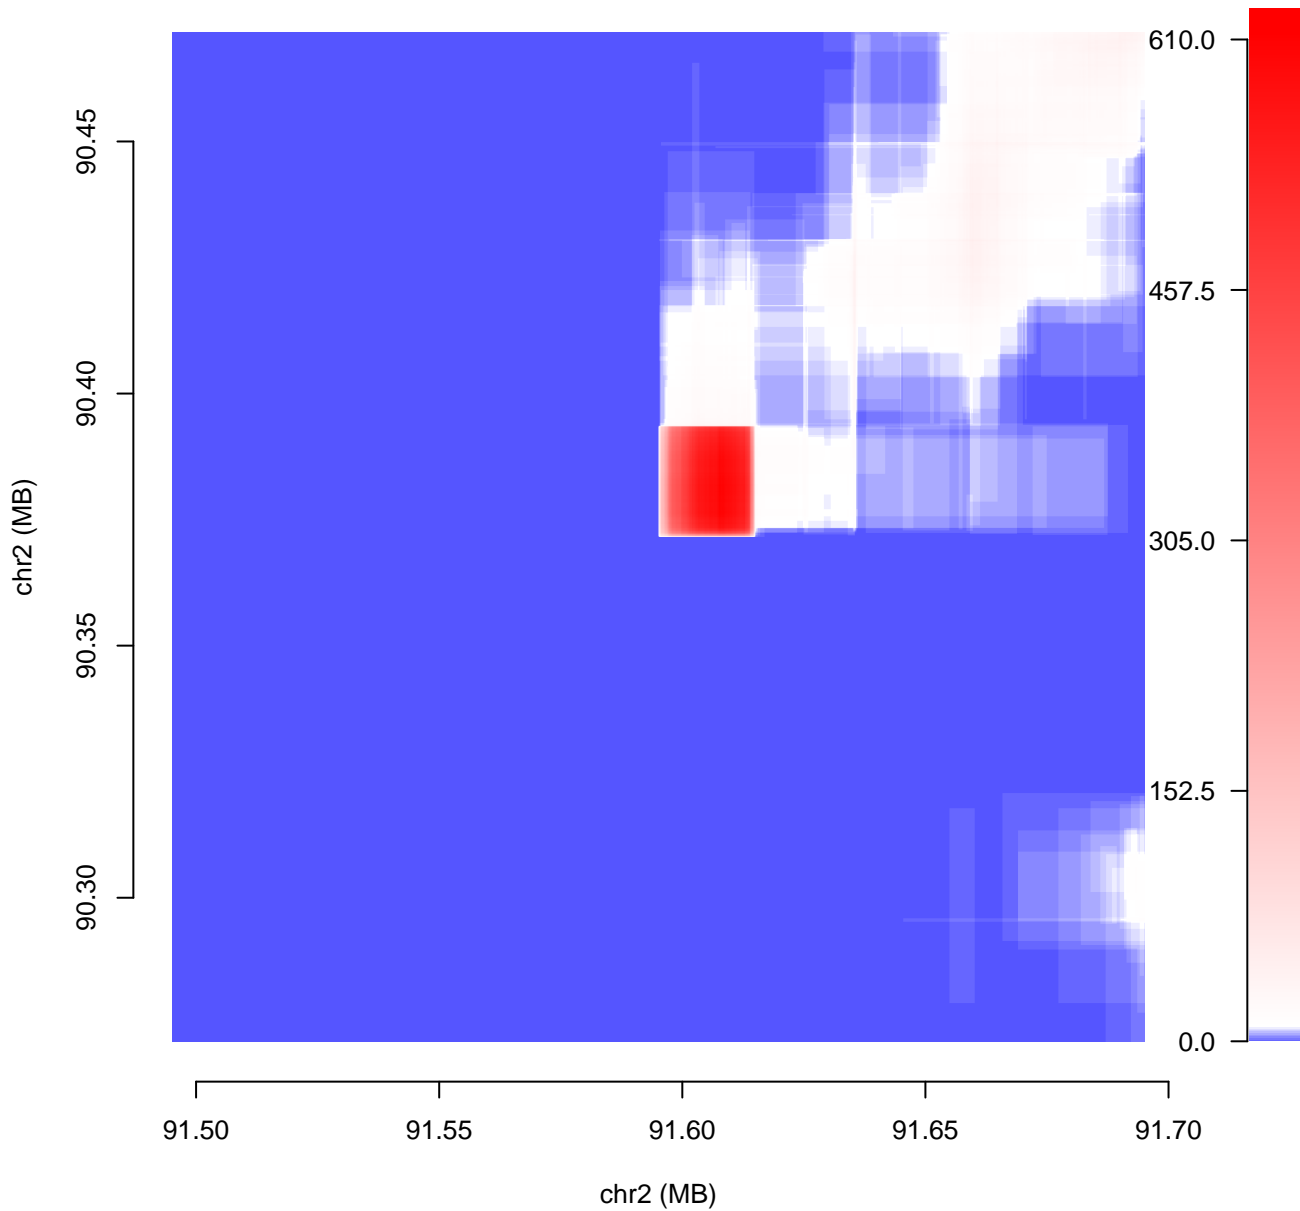

K562 chr2:90,393,681::chr2:91,614,964++

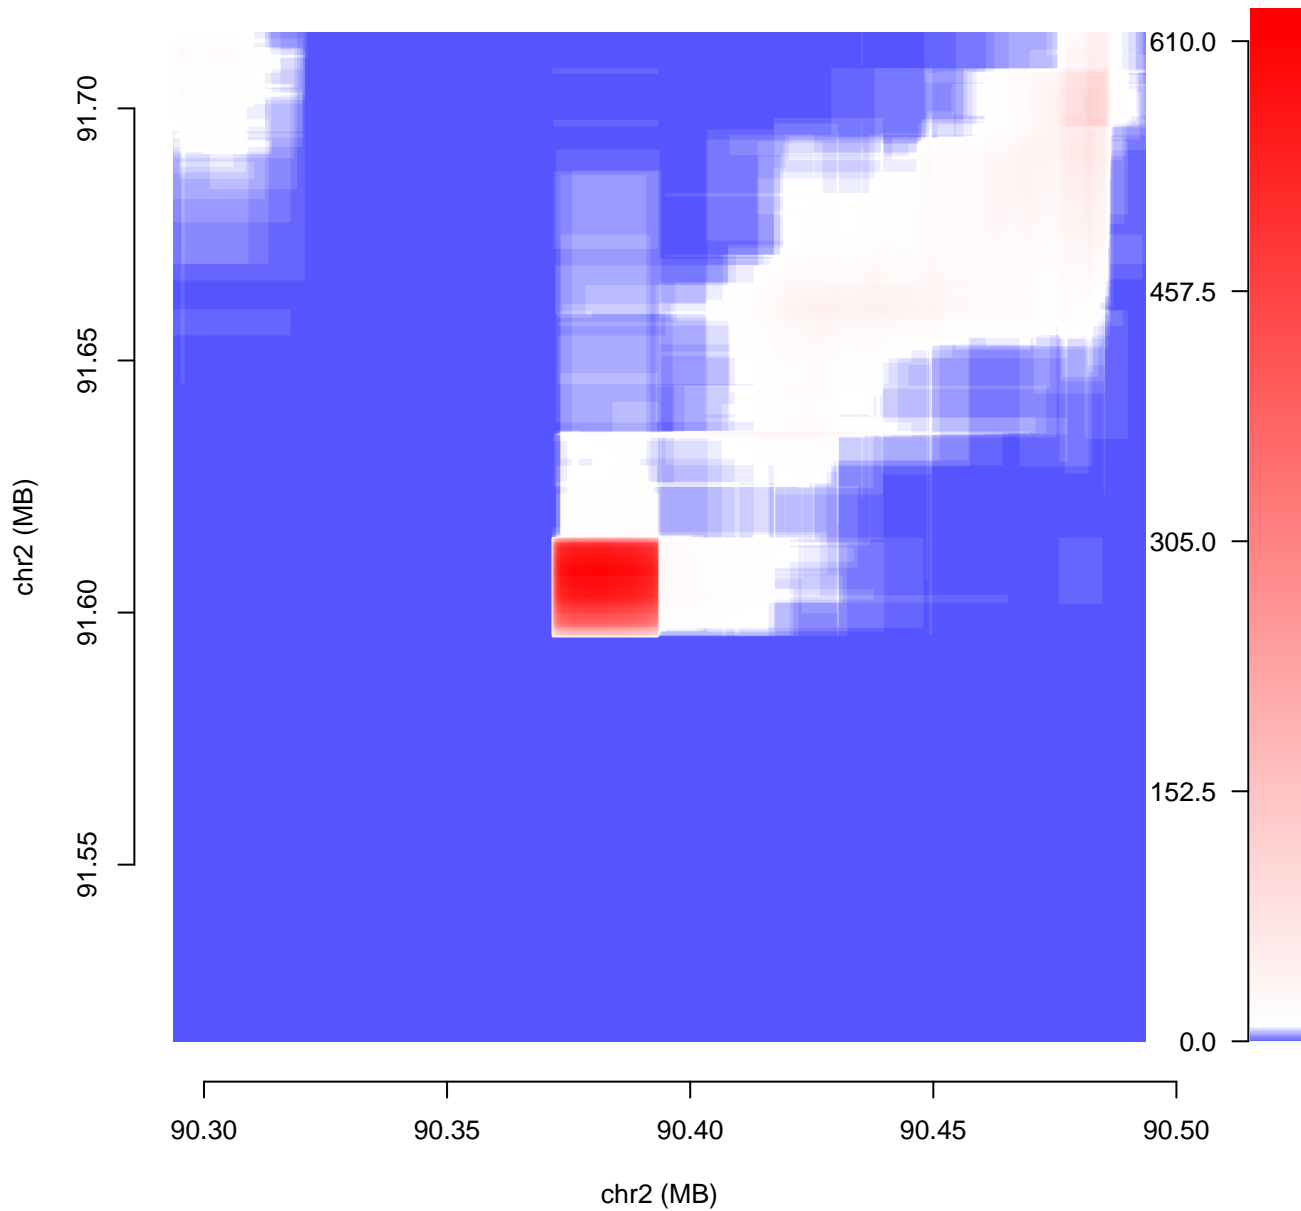

K562 chr2:90,393,681::chr2:90,371,524+-

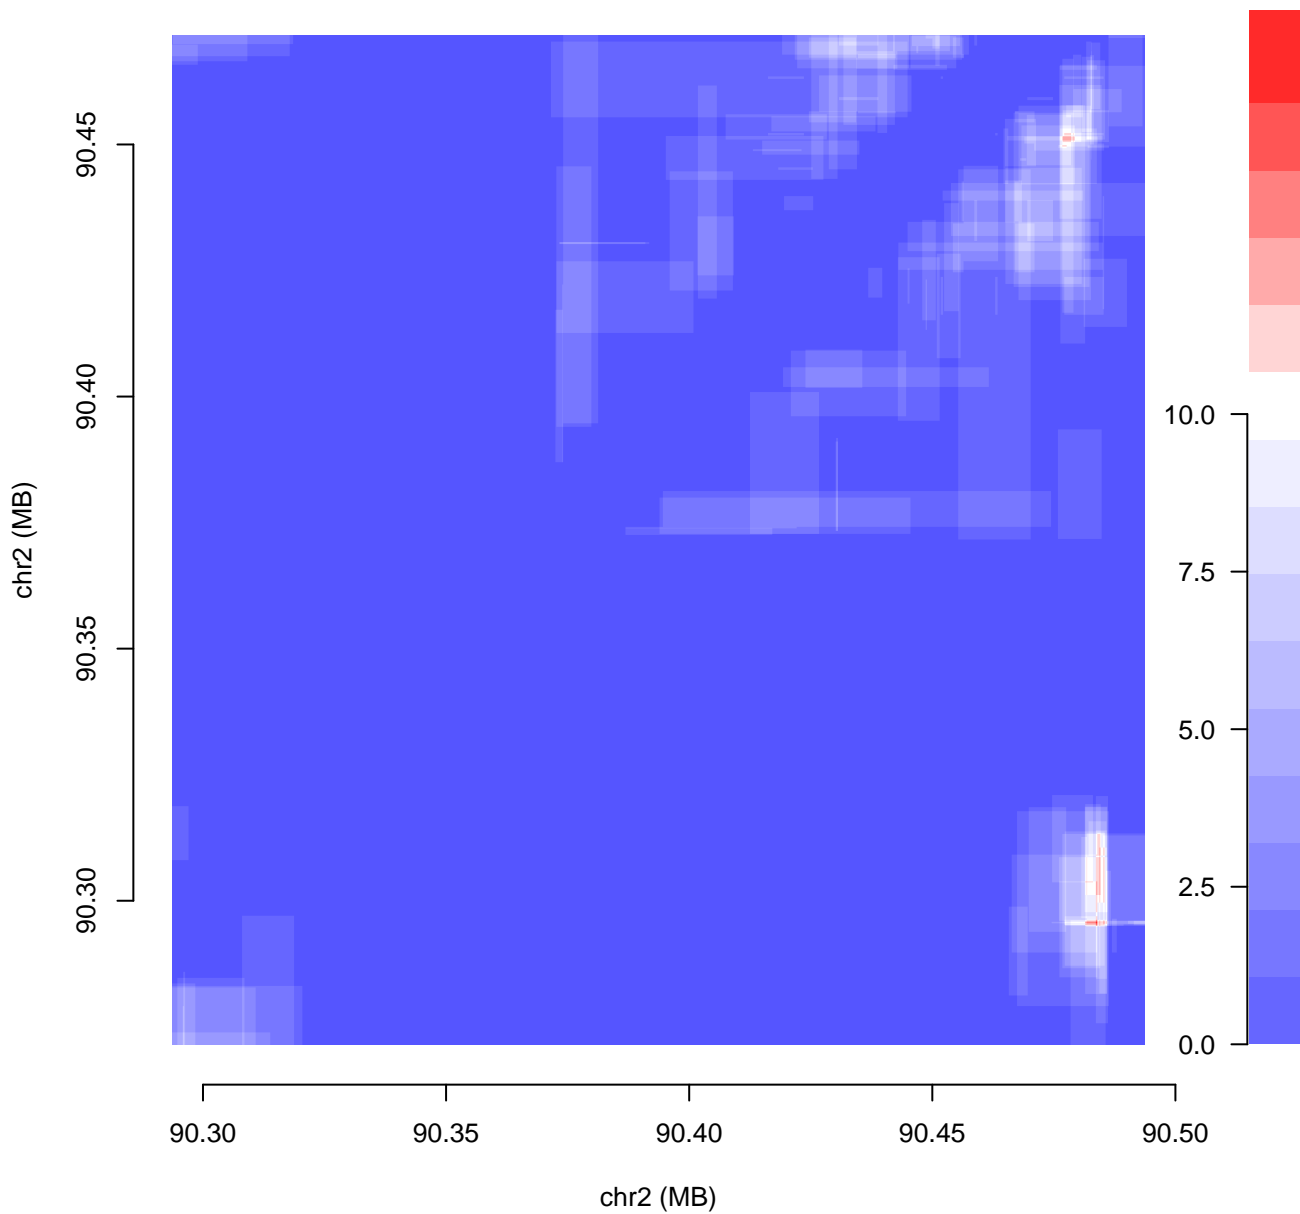

Supplement: Supplemental_Data.zip [file event_83.pdf › event_83.pdf]

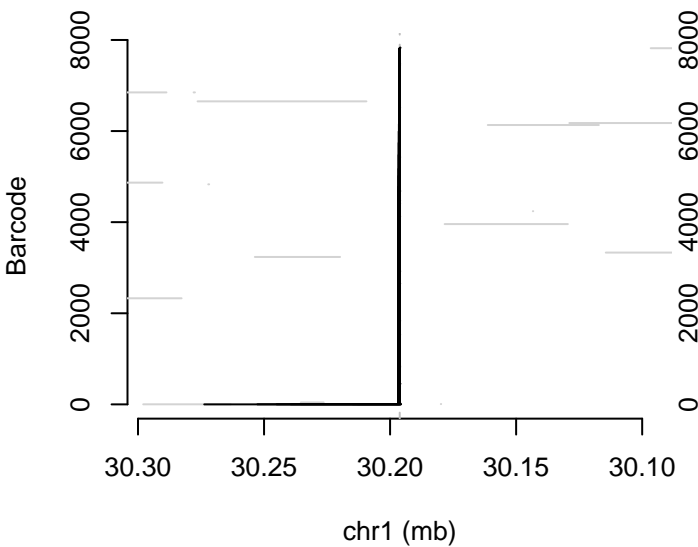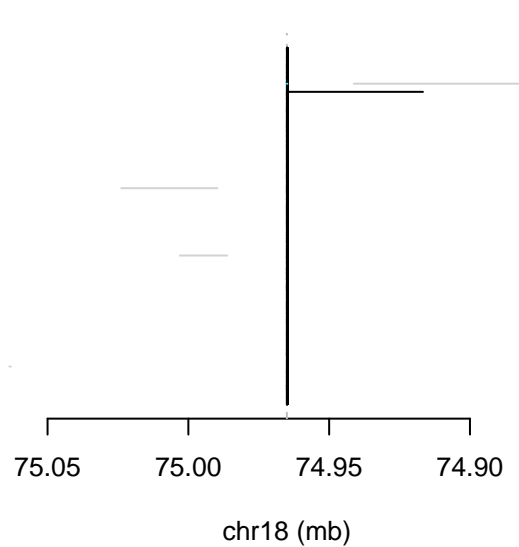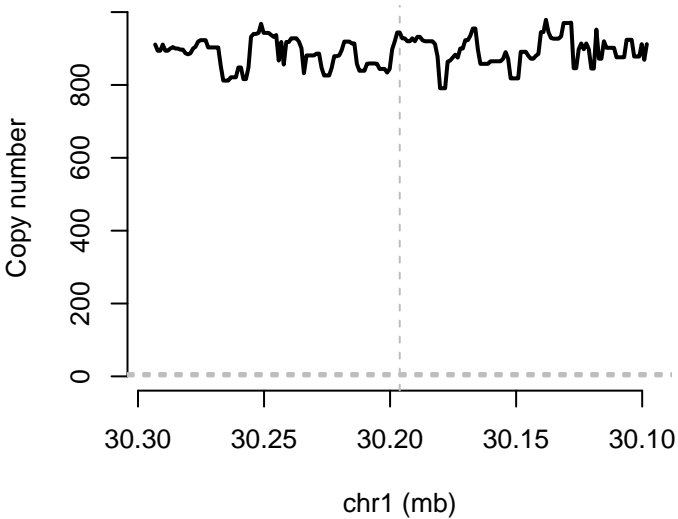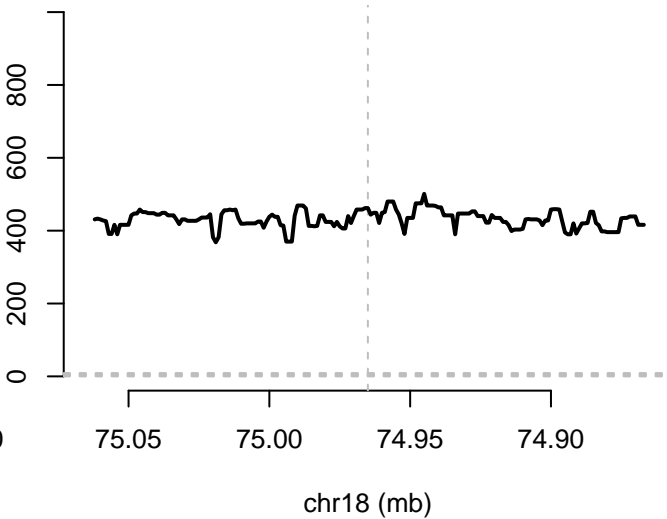

K562 chr18:74,965,016::chr1:30,196,171+-

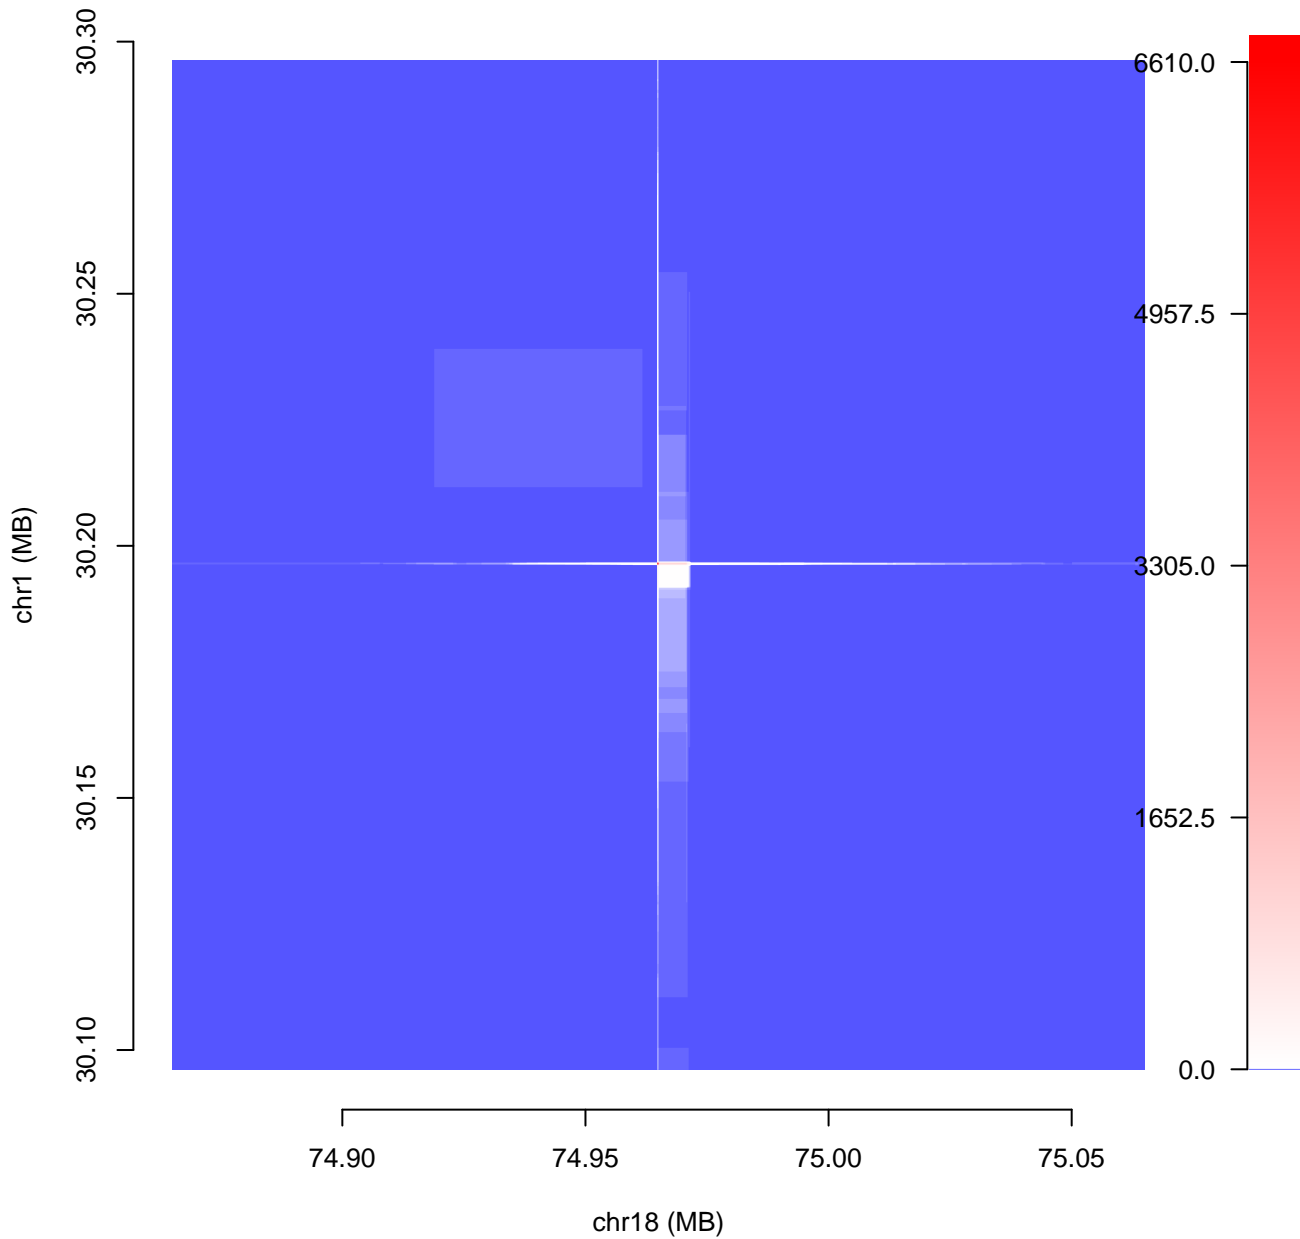

Supplement: Supplemental_Data.zip [file event_84.pdf › event_84.pdf]

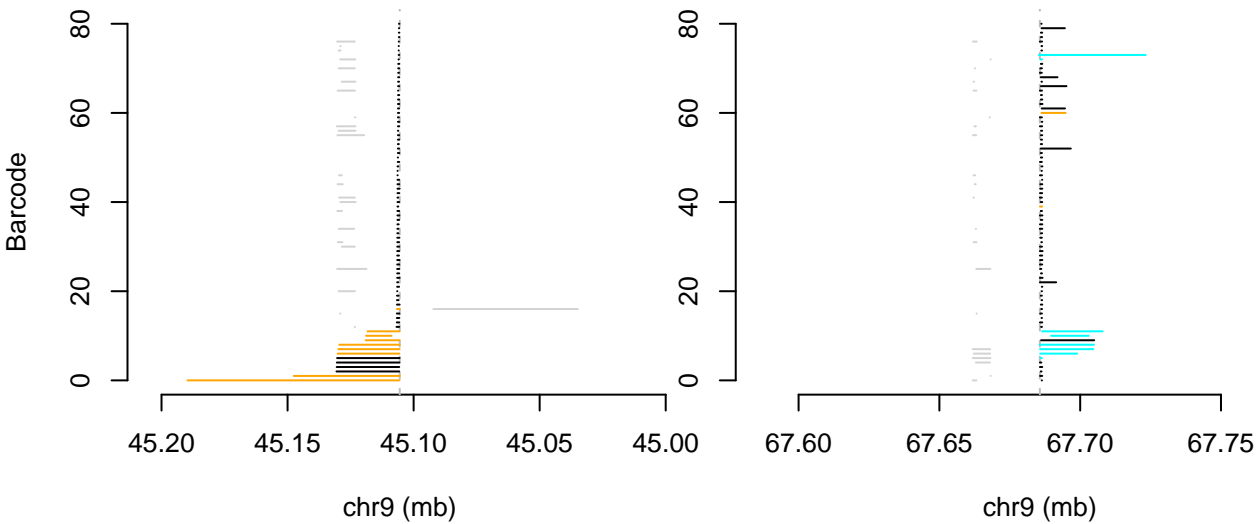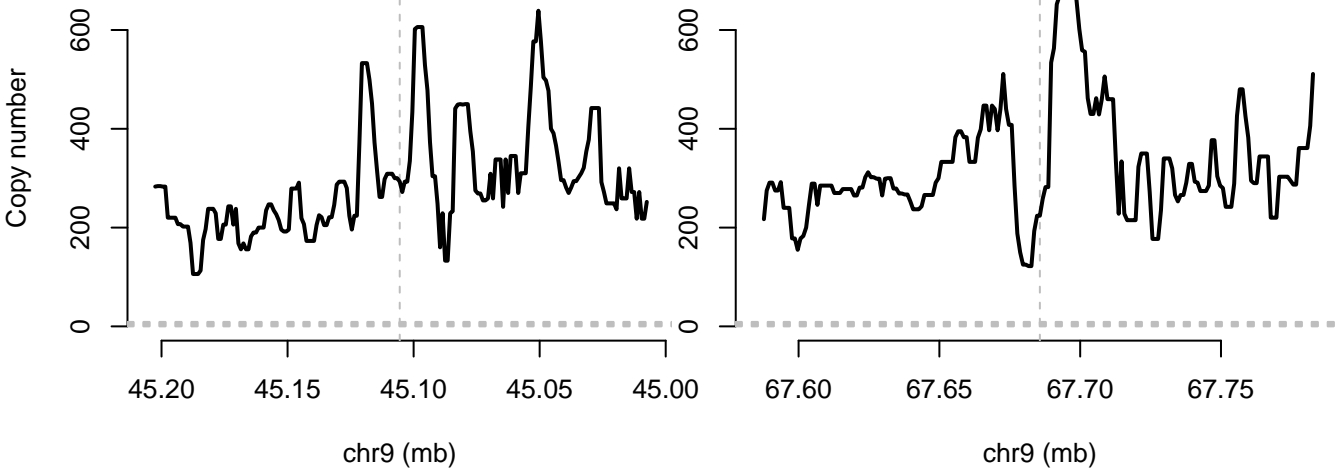

K562 chr9:67,685,686::chr9:45,105,505--

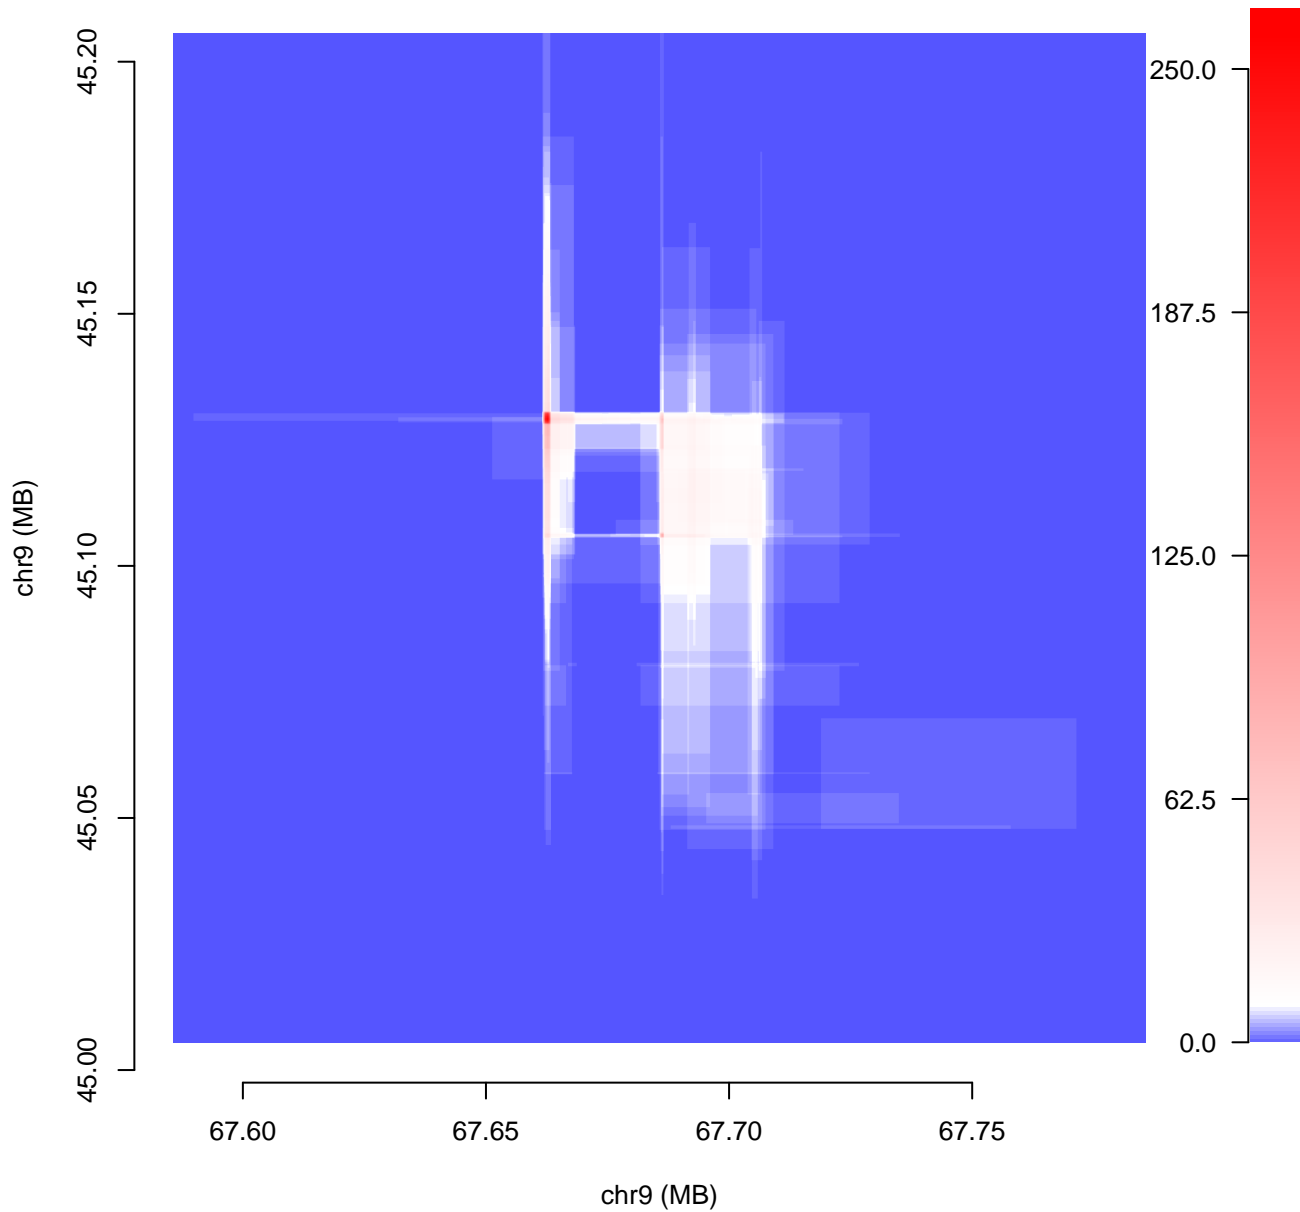

Supplement: Supplemental_Data.zip [file event_85.pdf › event_85.pdf]

Barcode

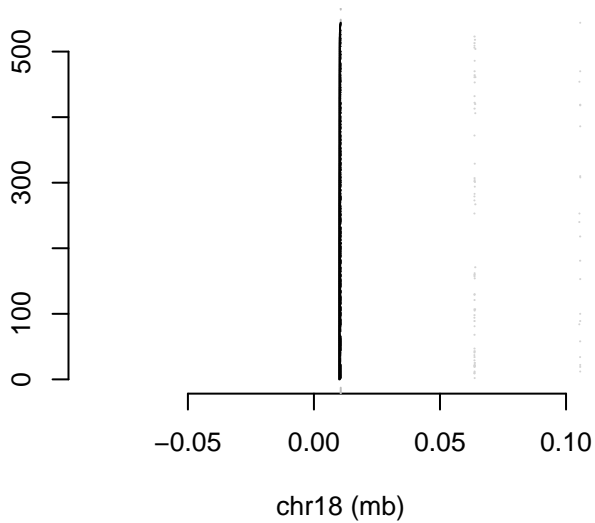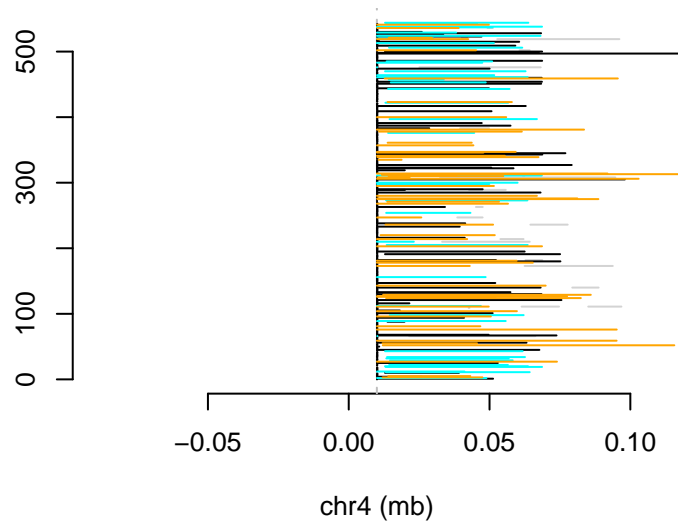

Copy number

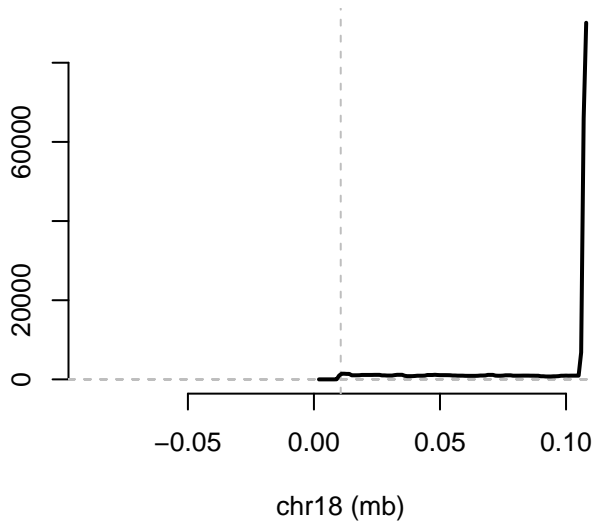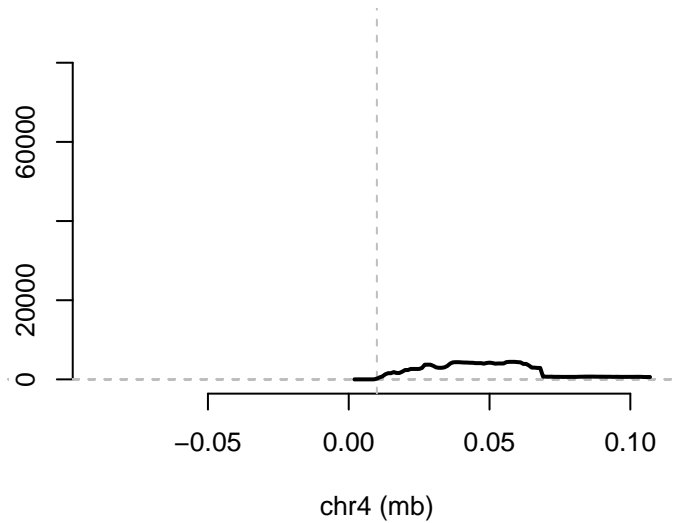

K562 chr4:9,995::chr18:10,633—+

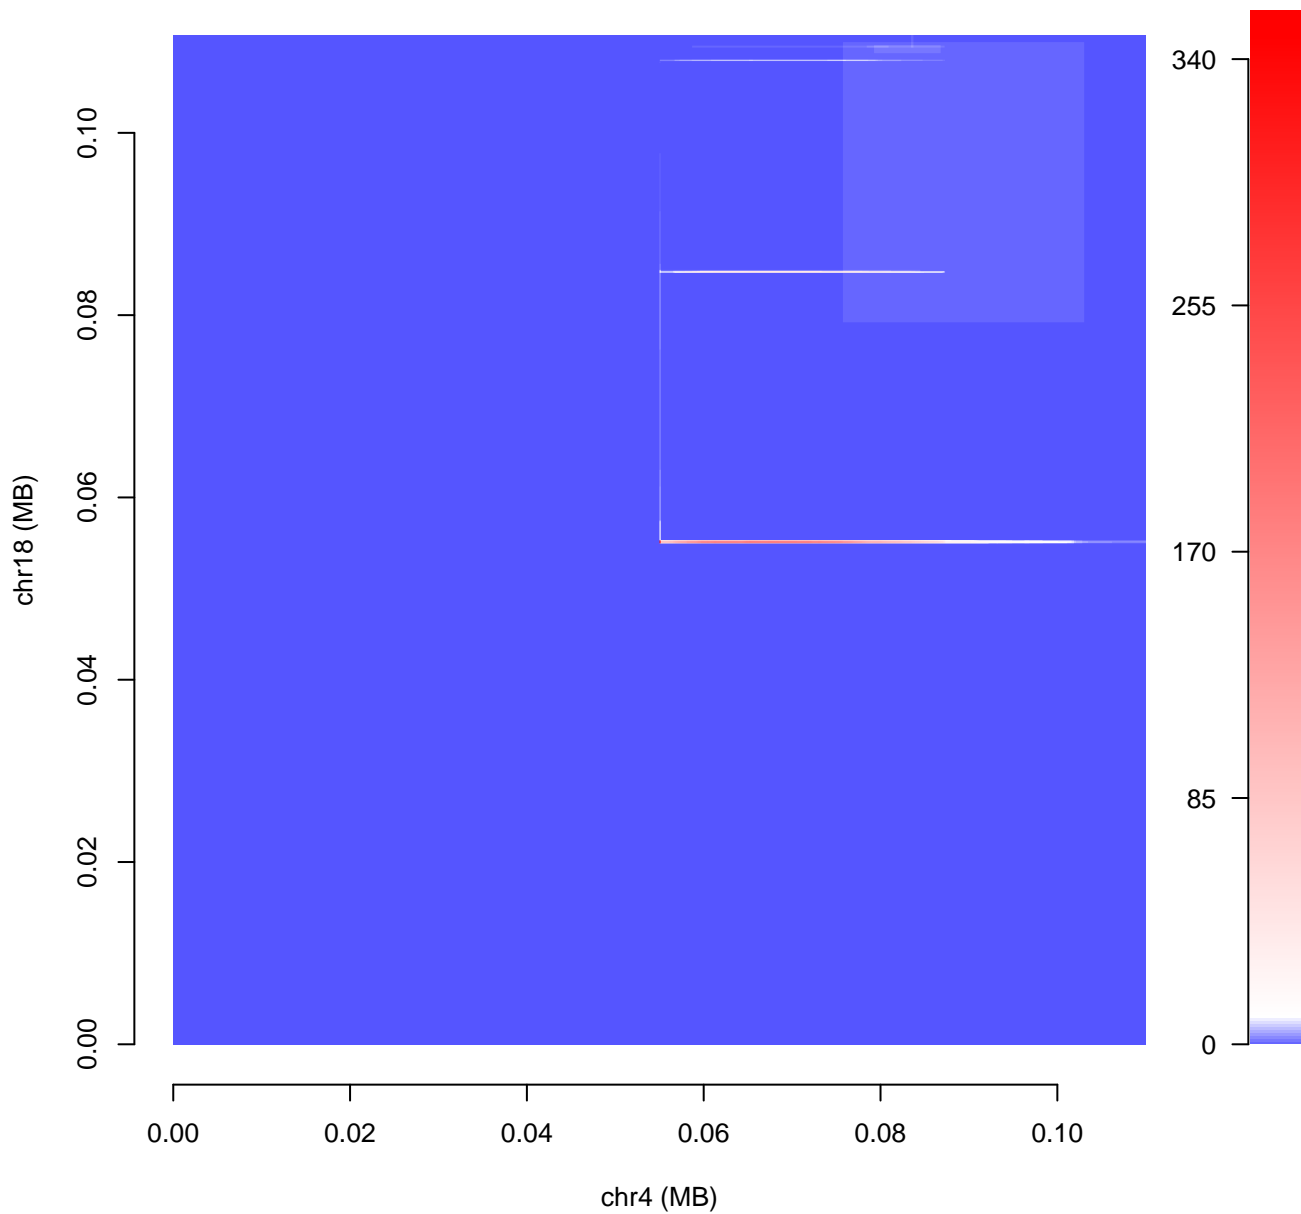

Supplement: Supplemental_Data.zip [file event_86.pdf › event_86.pdf]

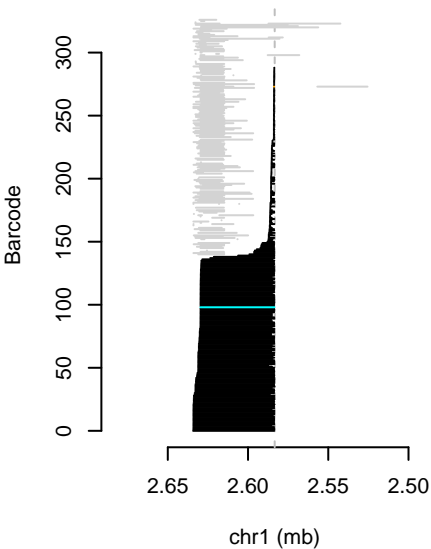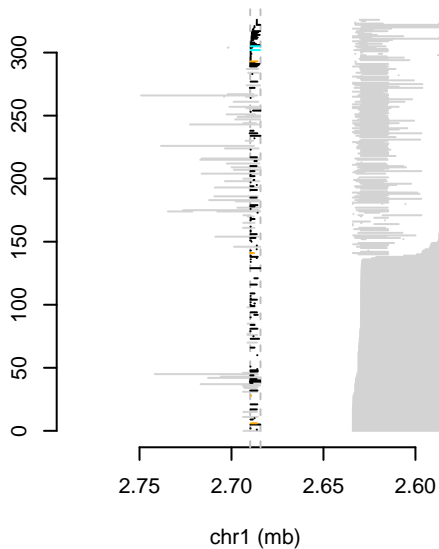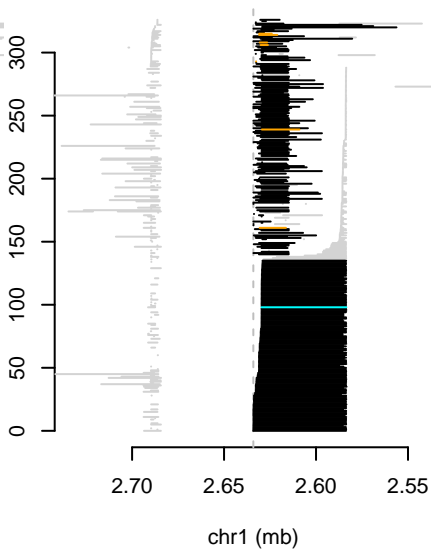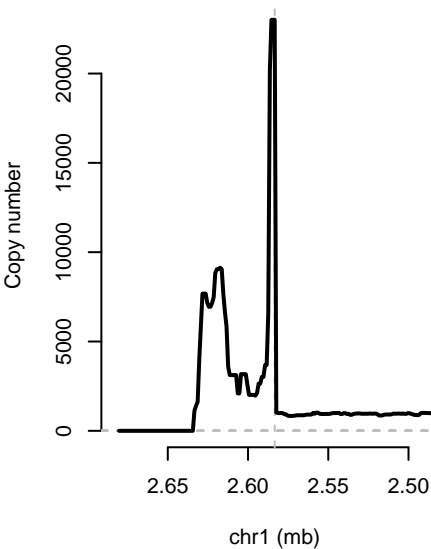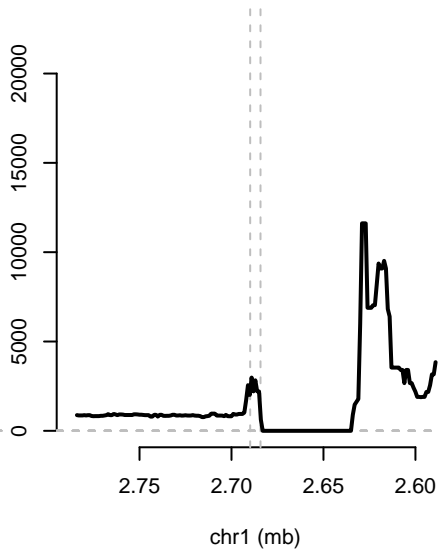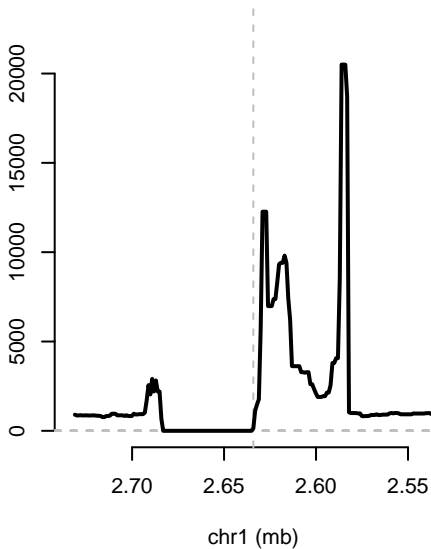

K562 chr1:2,583,389::chr1:2,689,842--+

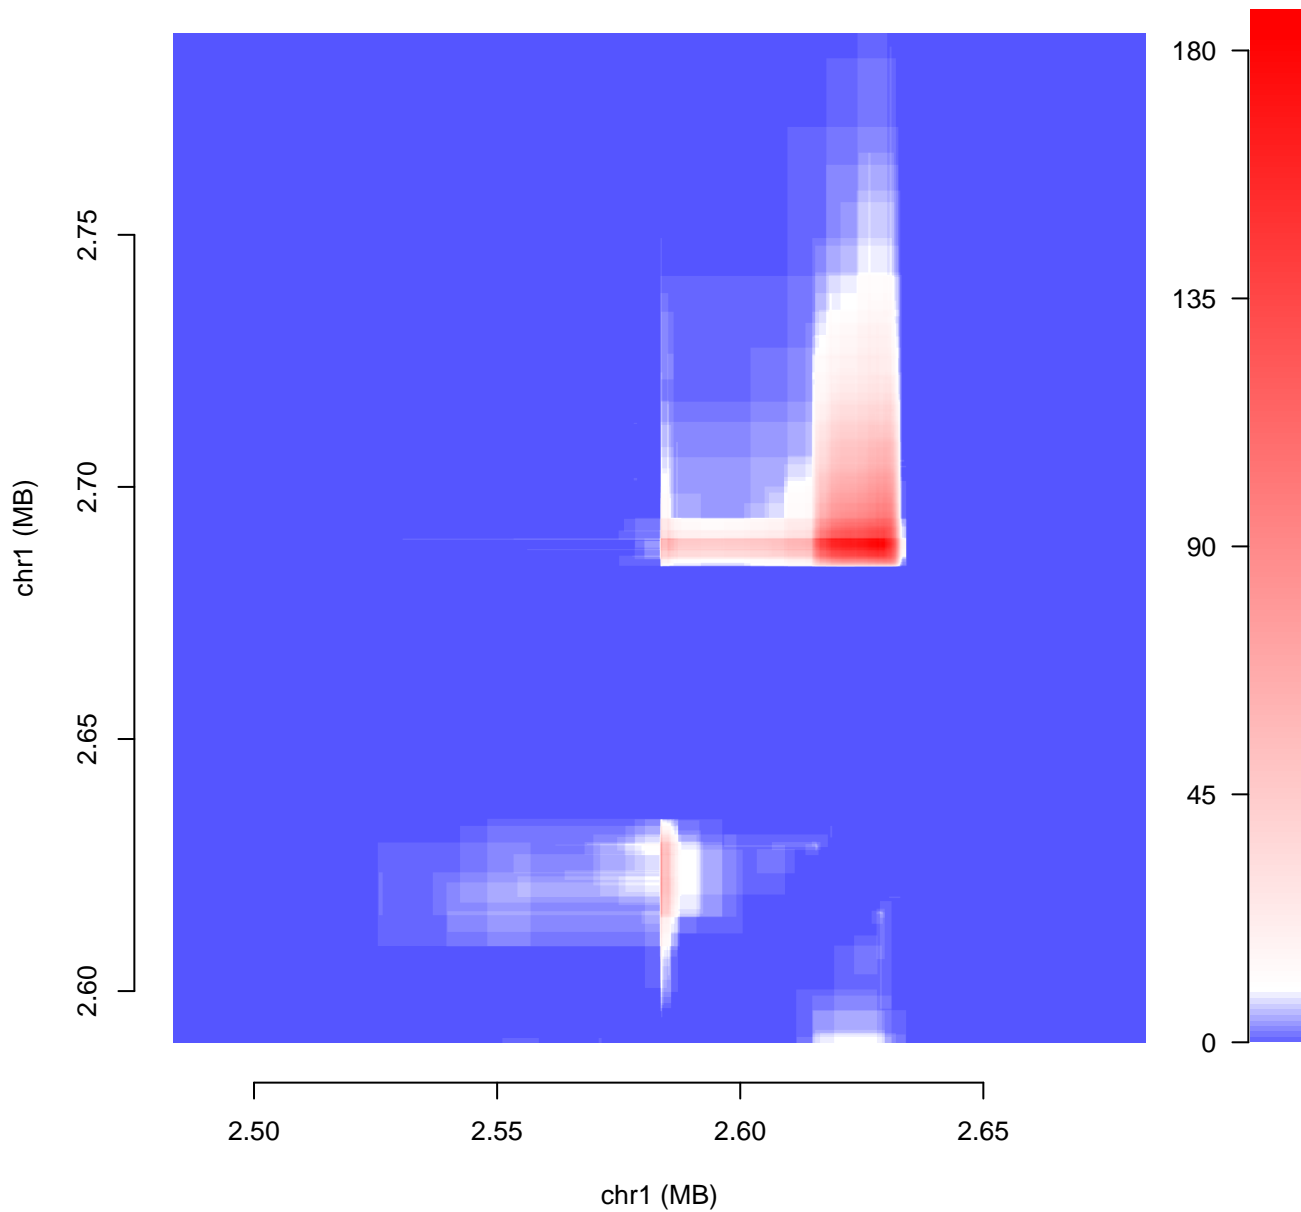

K562 chr1:2,634,083::chr1:2,684,226+-

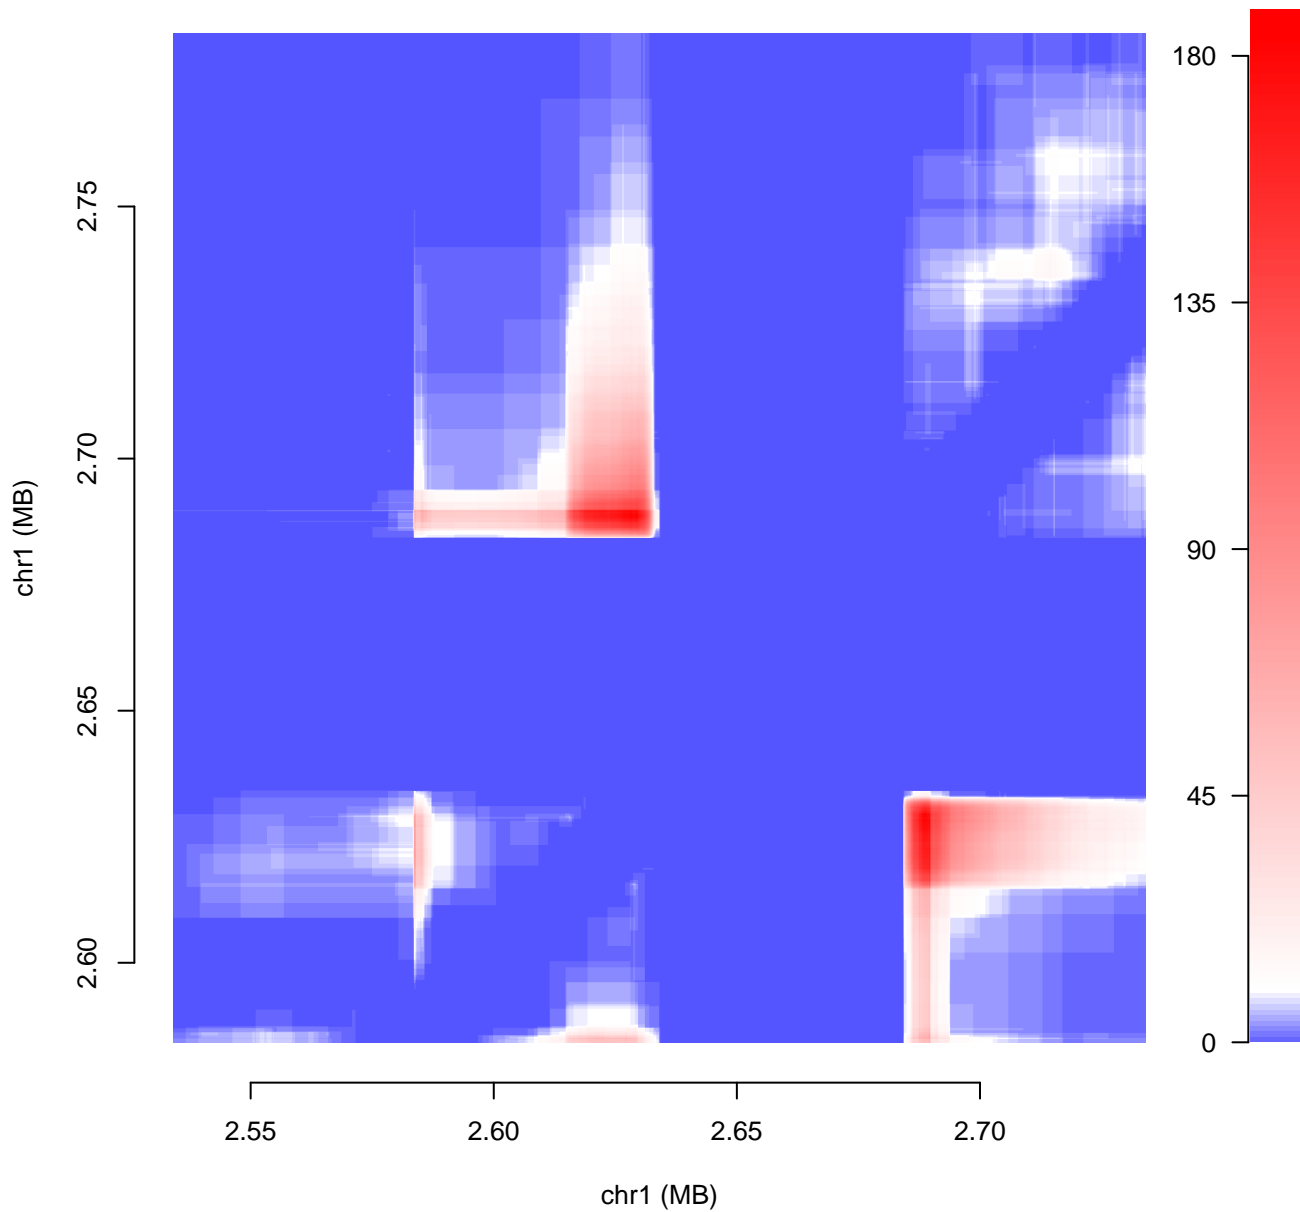

K562 chr1:2,689,842::chr1:2,684,226+-

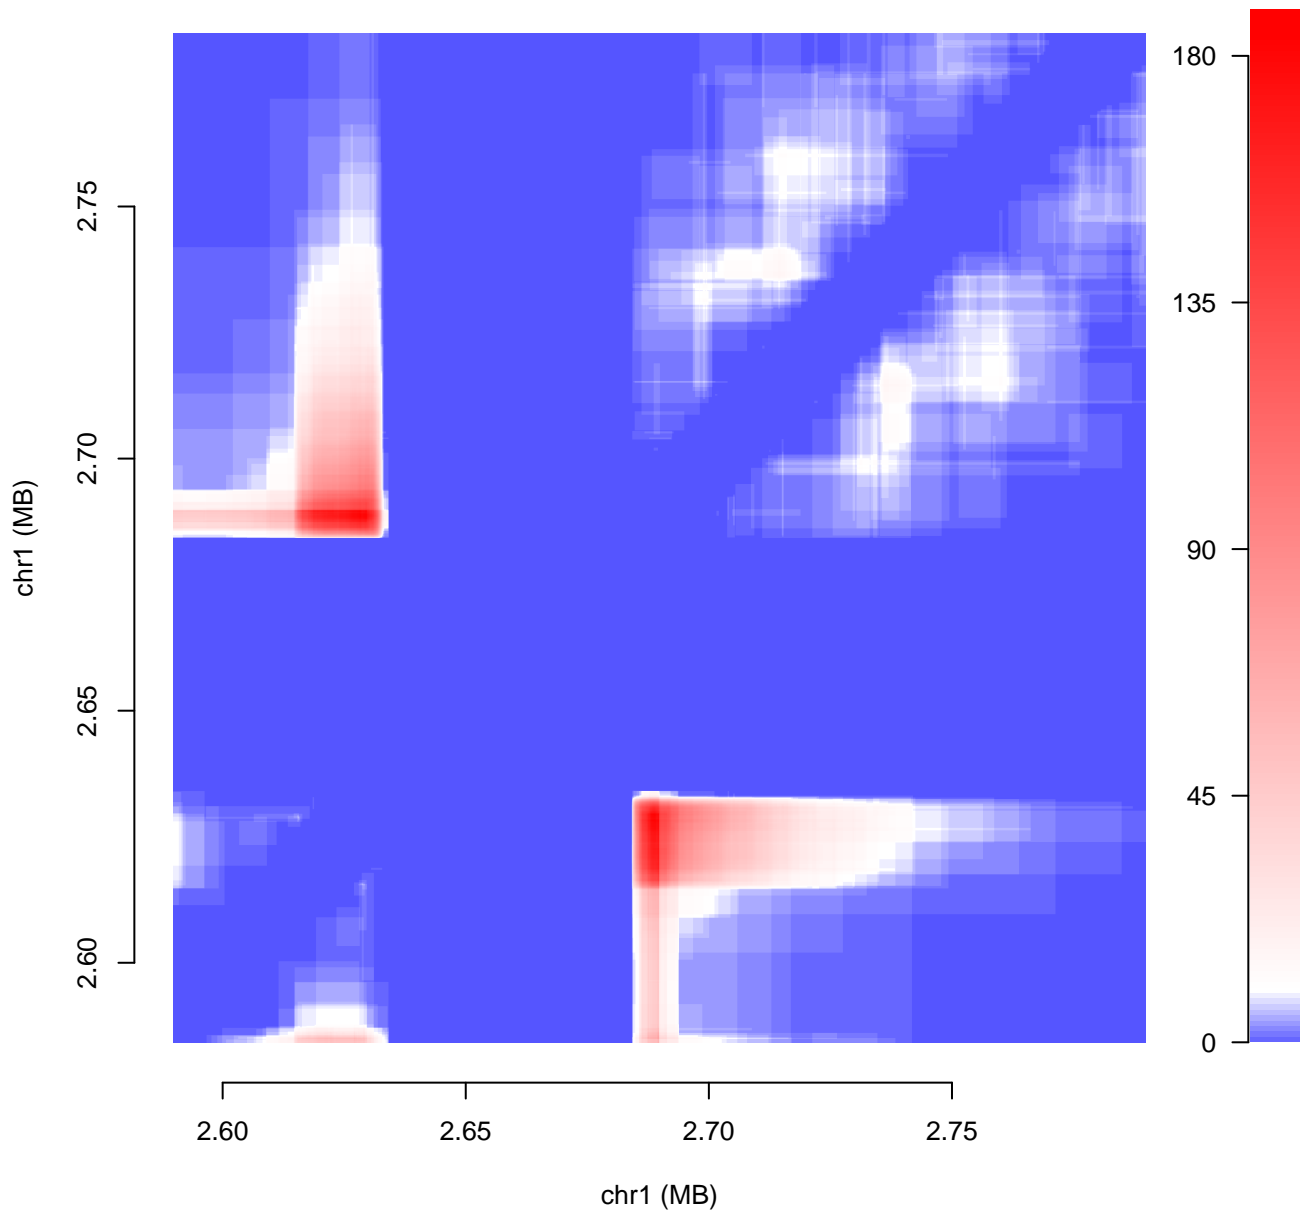

Supplement: Supplemental_Data.zip [file event_87.pdf › event_87.pdf]

Barcode

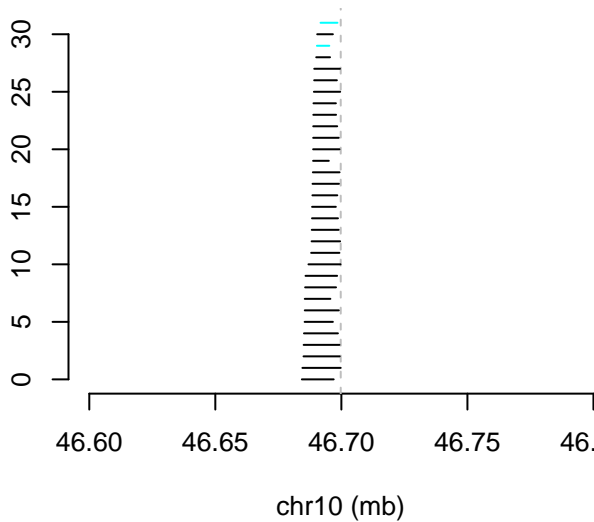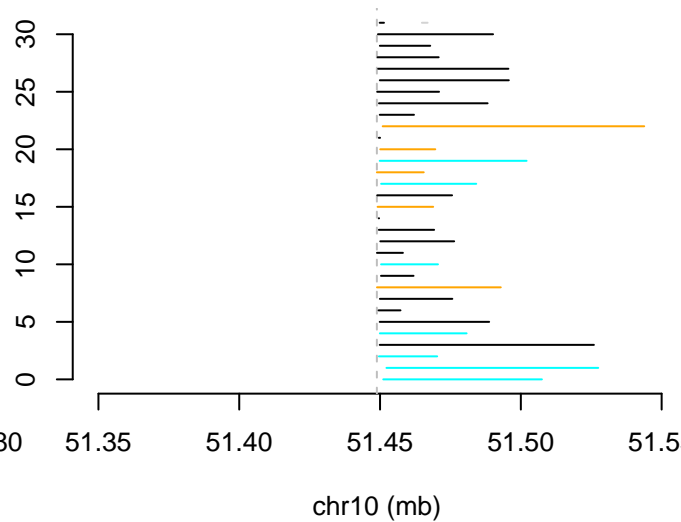

Copy number

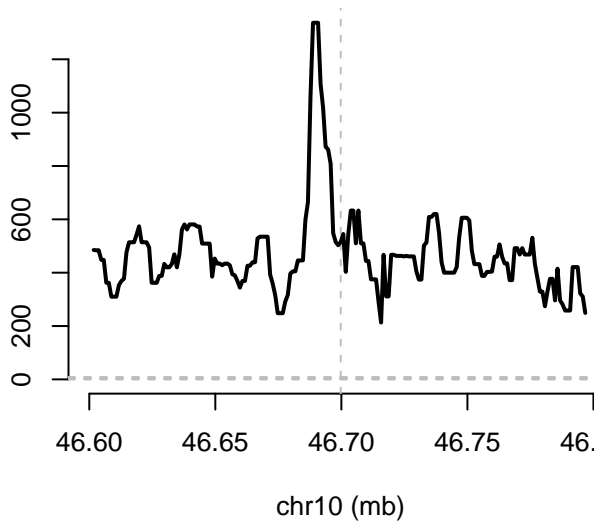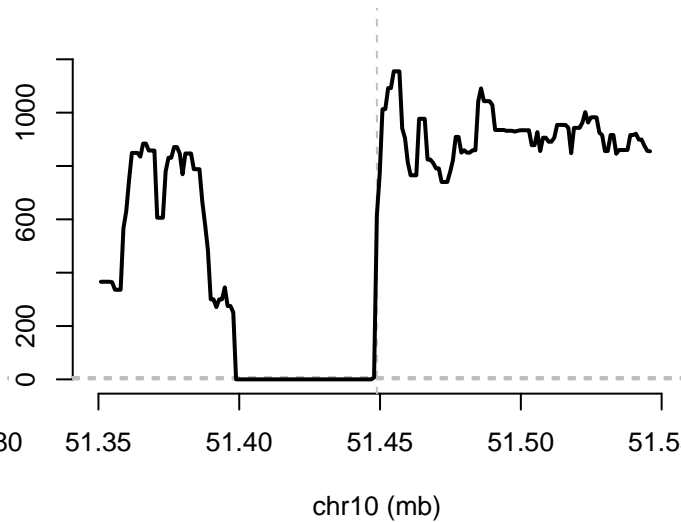

K562 chr10:51,448,874::chr10:46,699,750-+

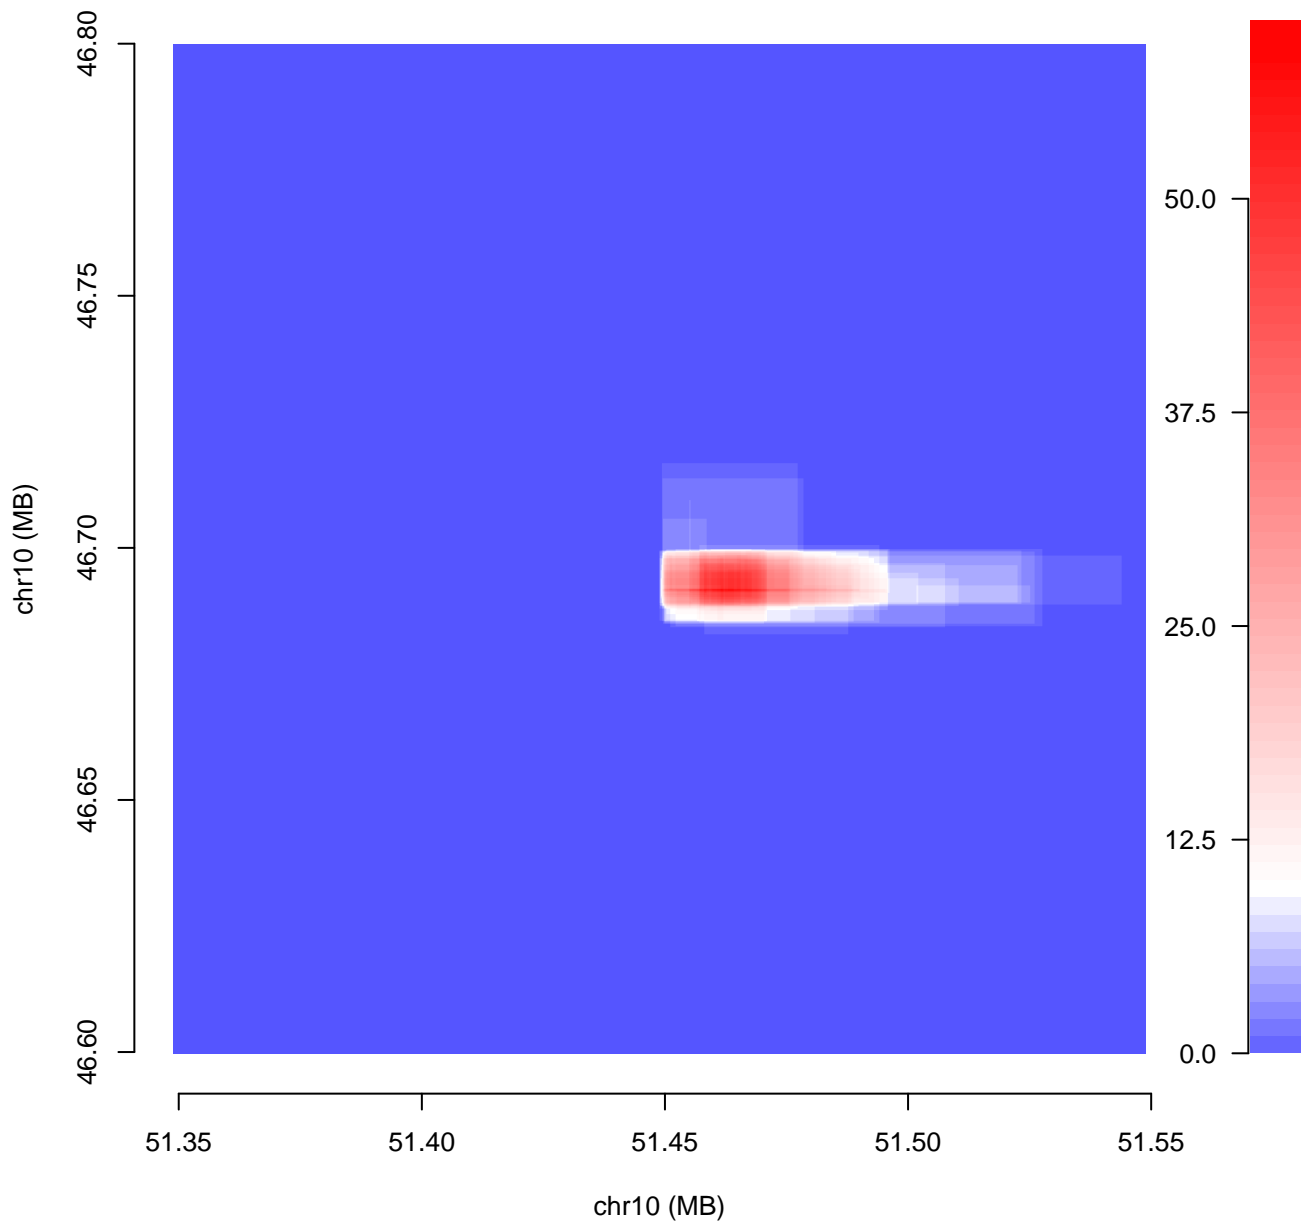

Supplement: Supplemental_Data.zip [file event_88.pdf › event_88.pdf]

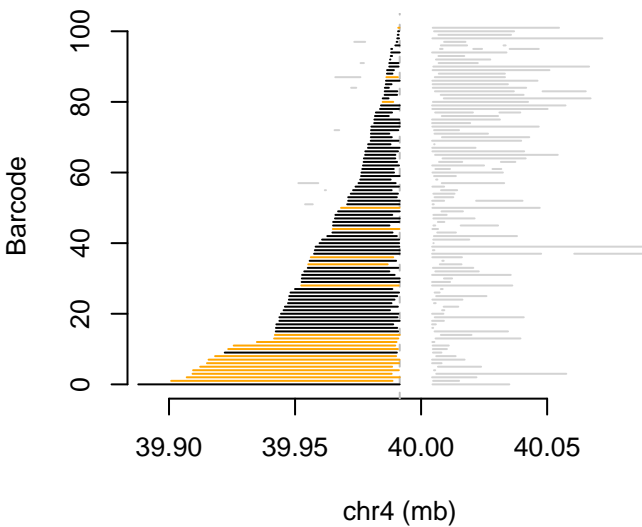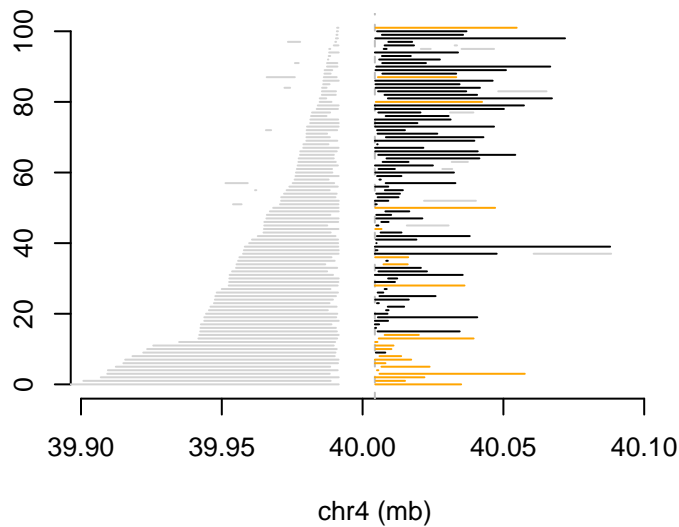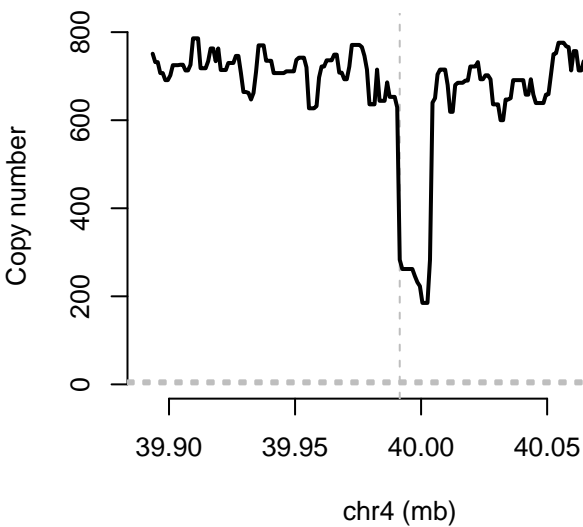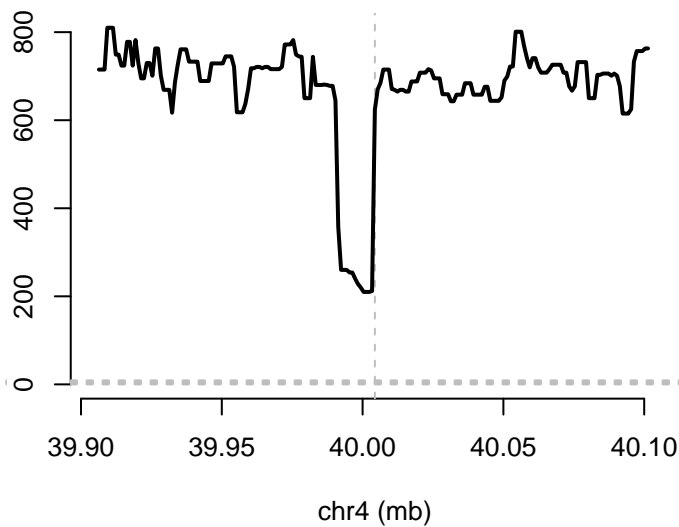

K562 chr4:39,991,529::chr4:40,004,361+-

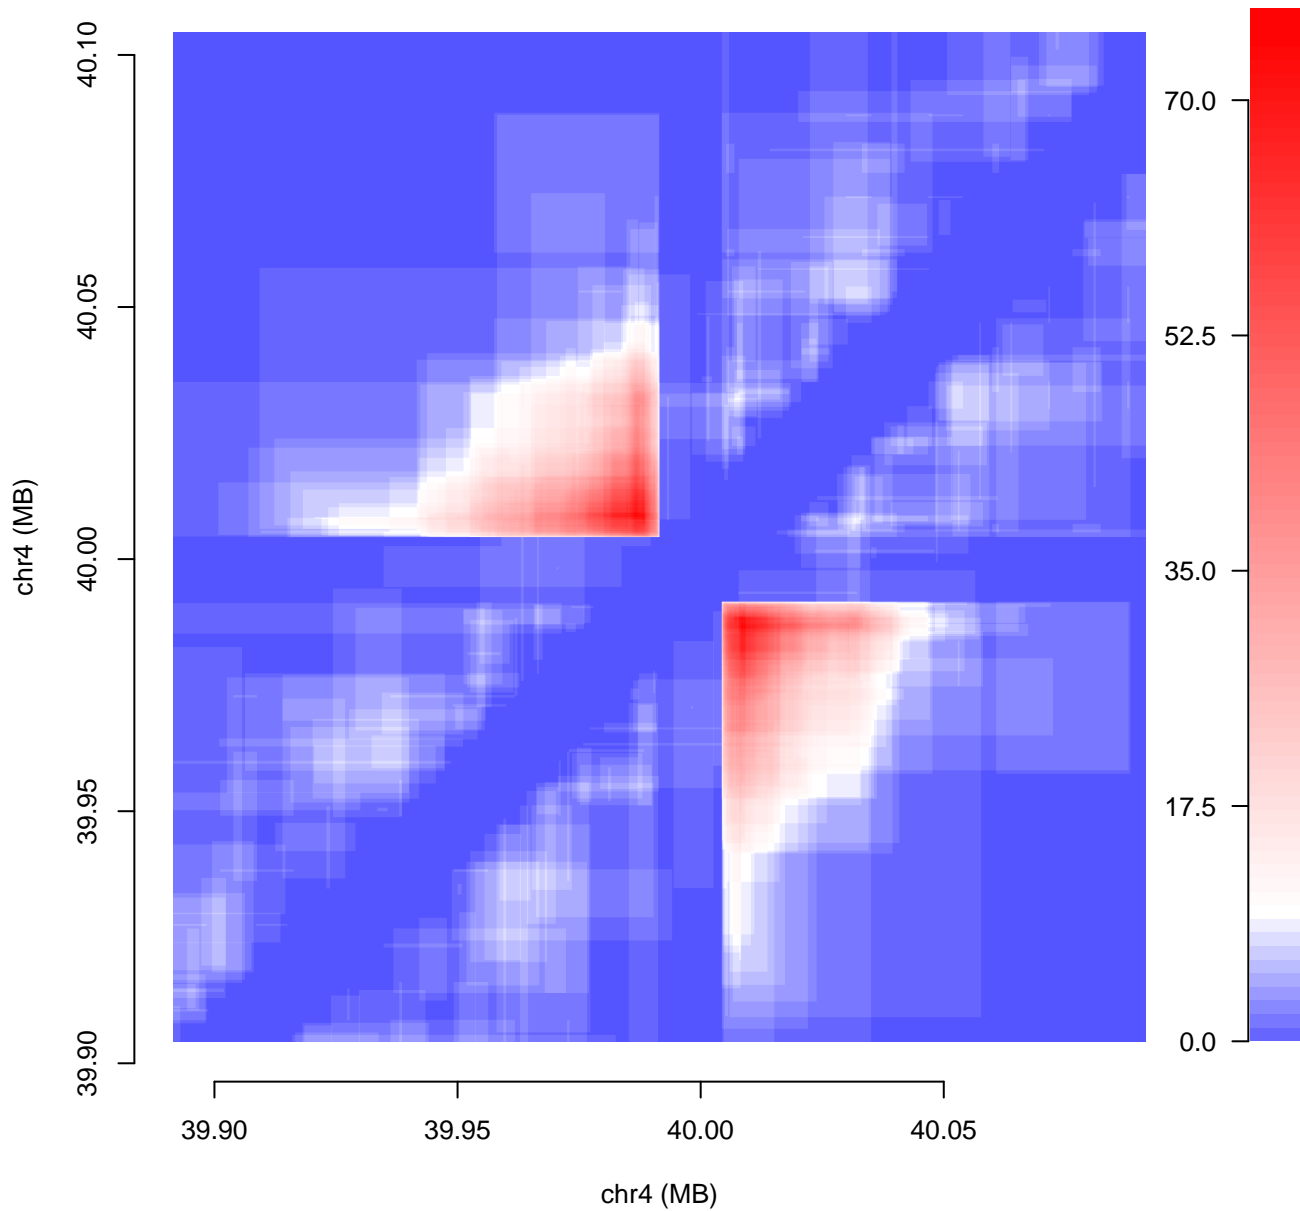

Supplement: Supplemental_Data.zip [file event_89.pdf › event_89.pdf]

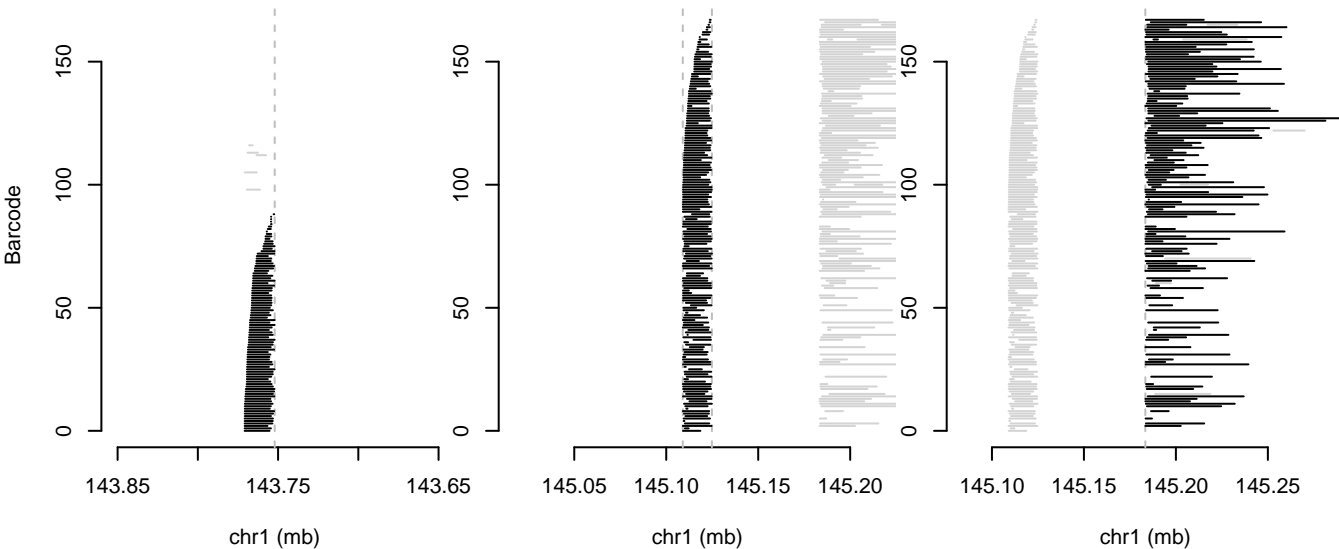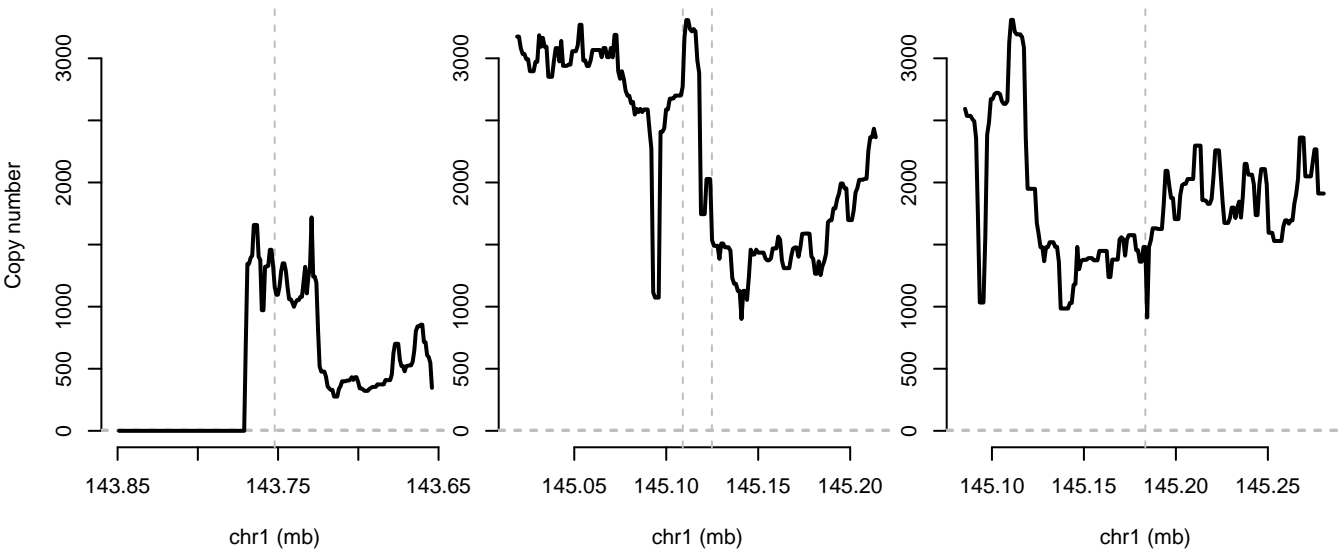

K562 chr1:145,124,814::chr1:145,183,390+-

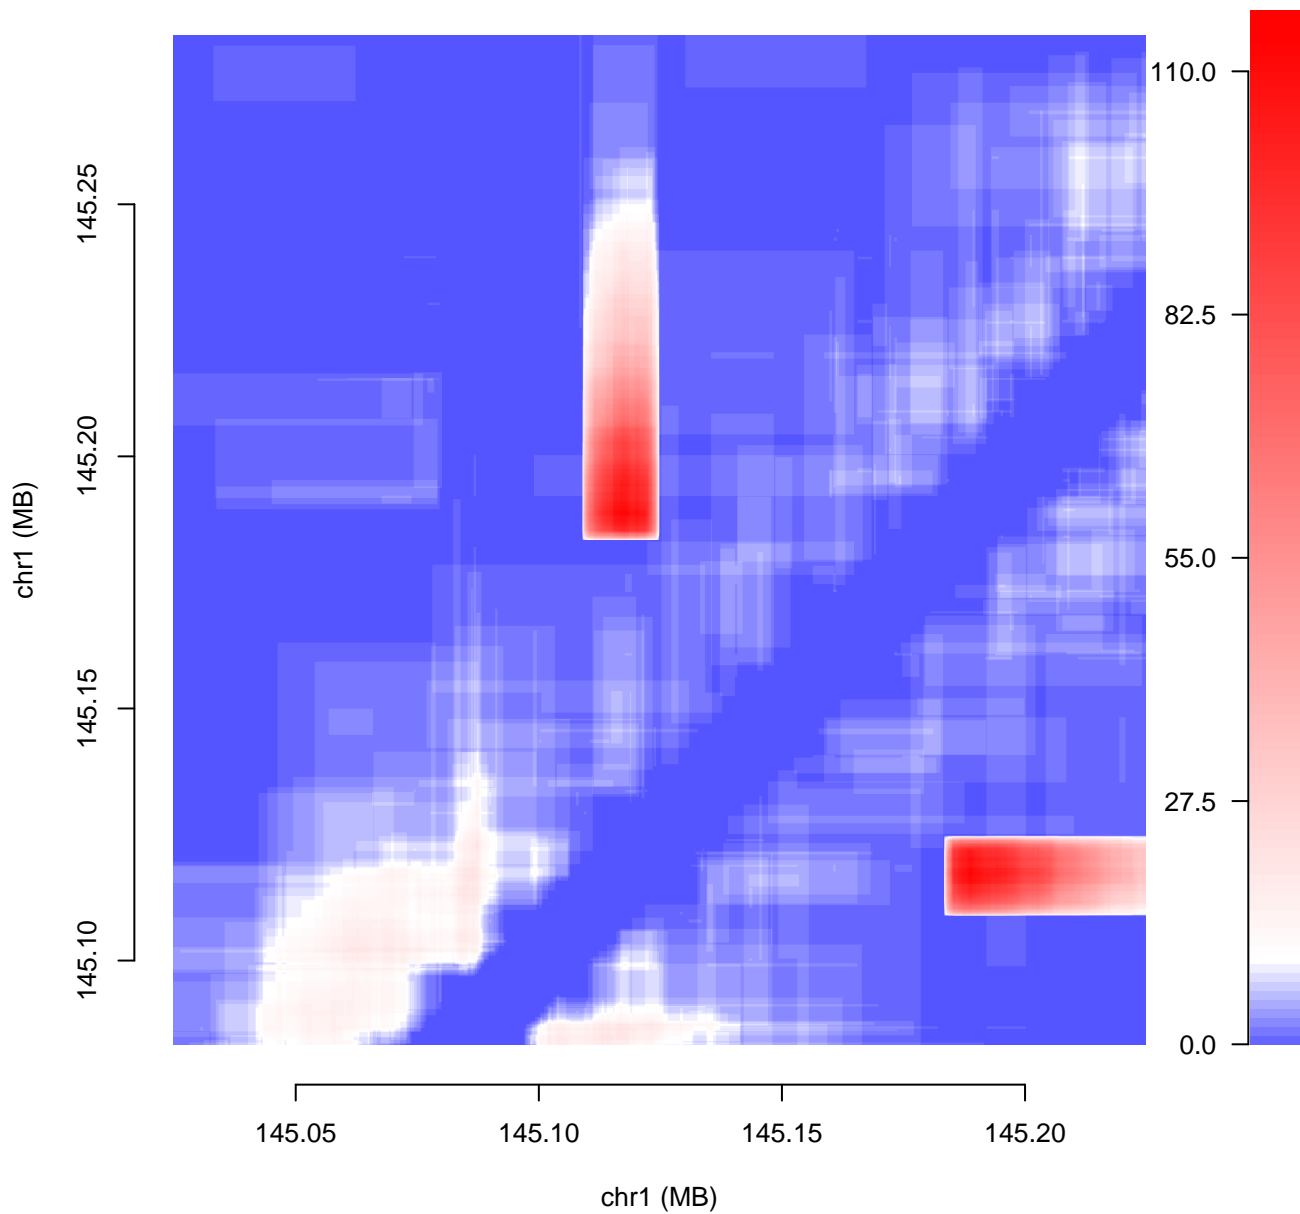

K562 chr1:145,124,814::chr1:145,109,008+-

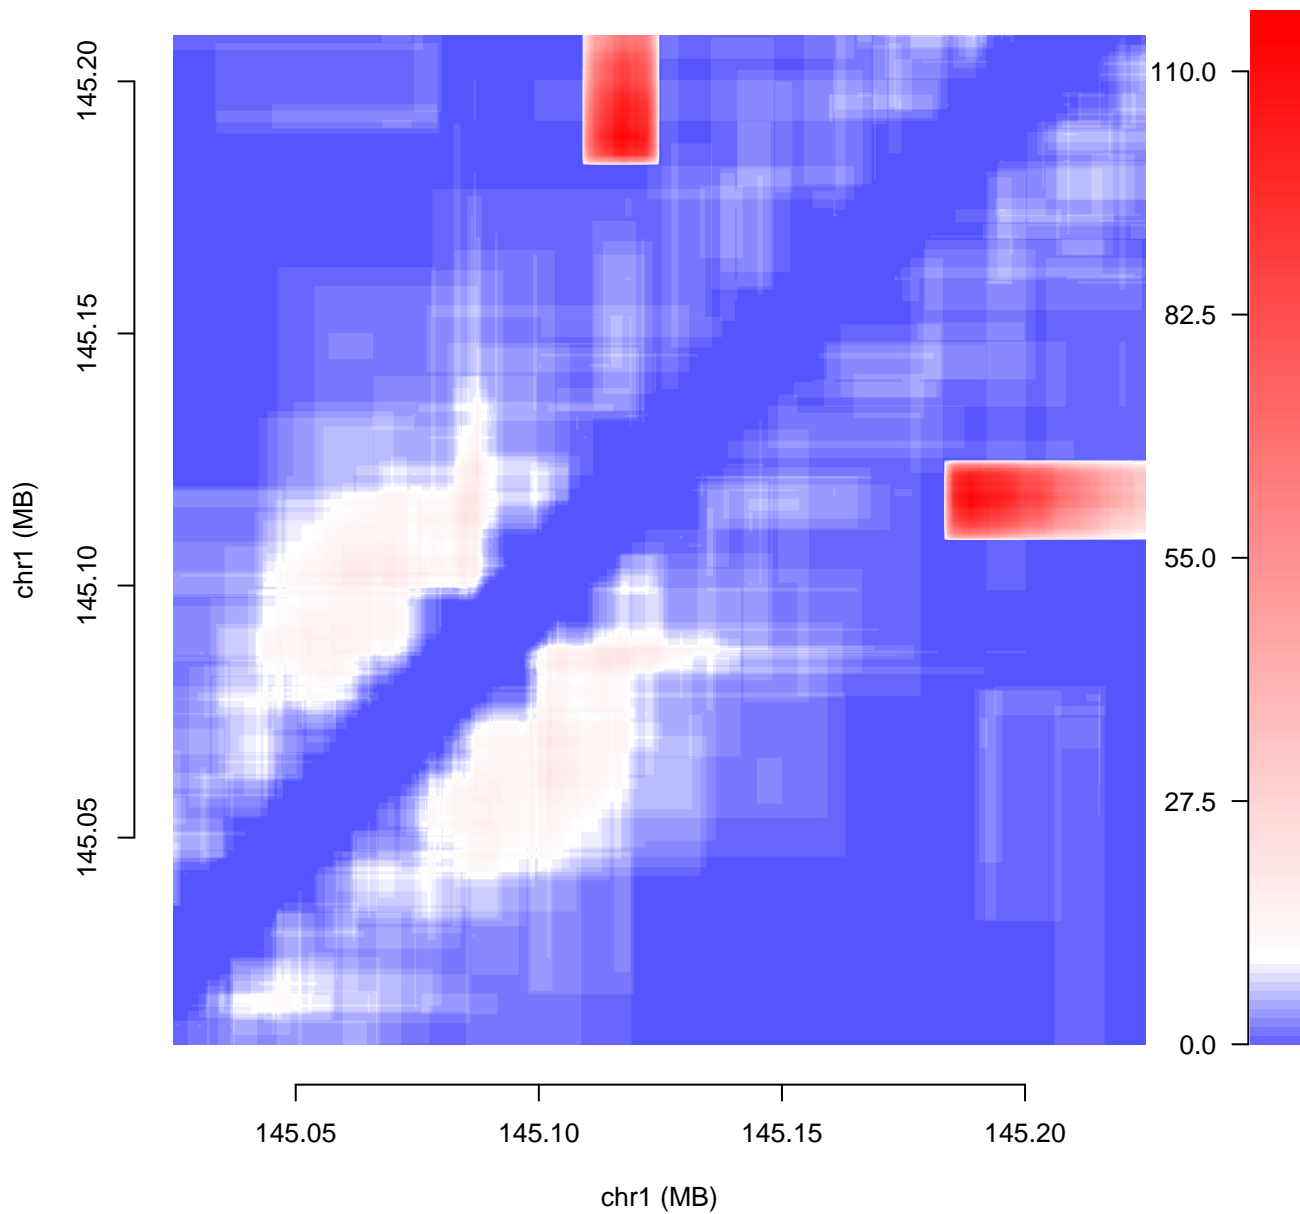

K562 chr1:145,109,008::chr1:143,752,114--

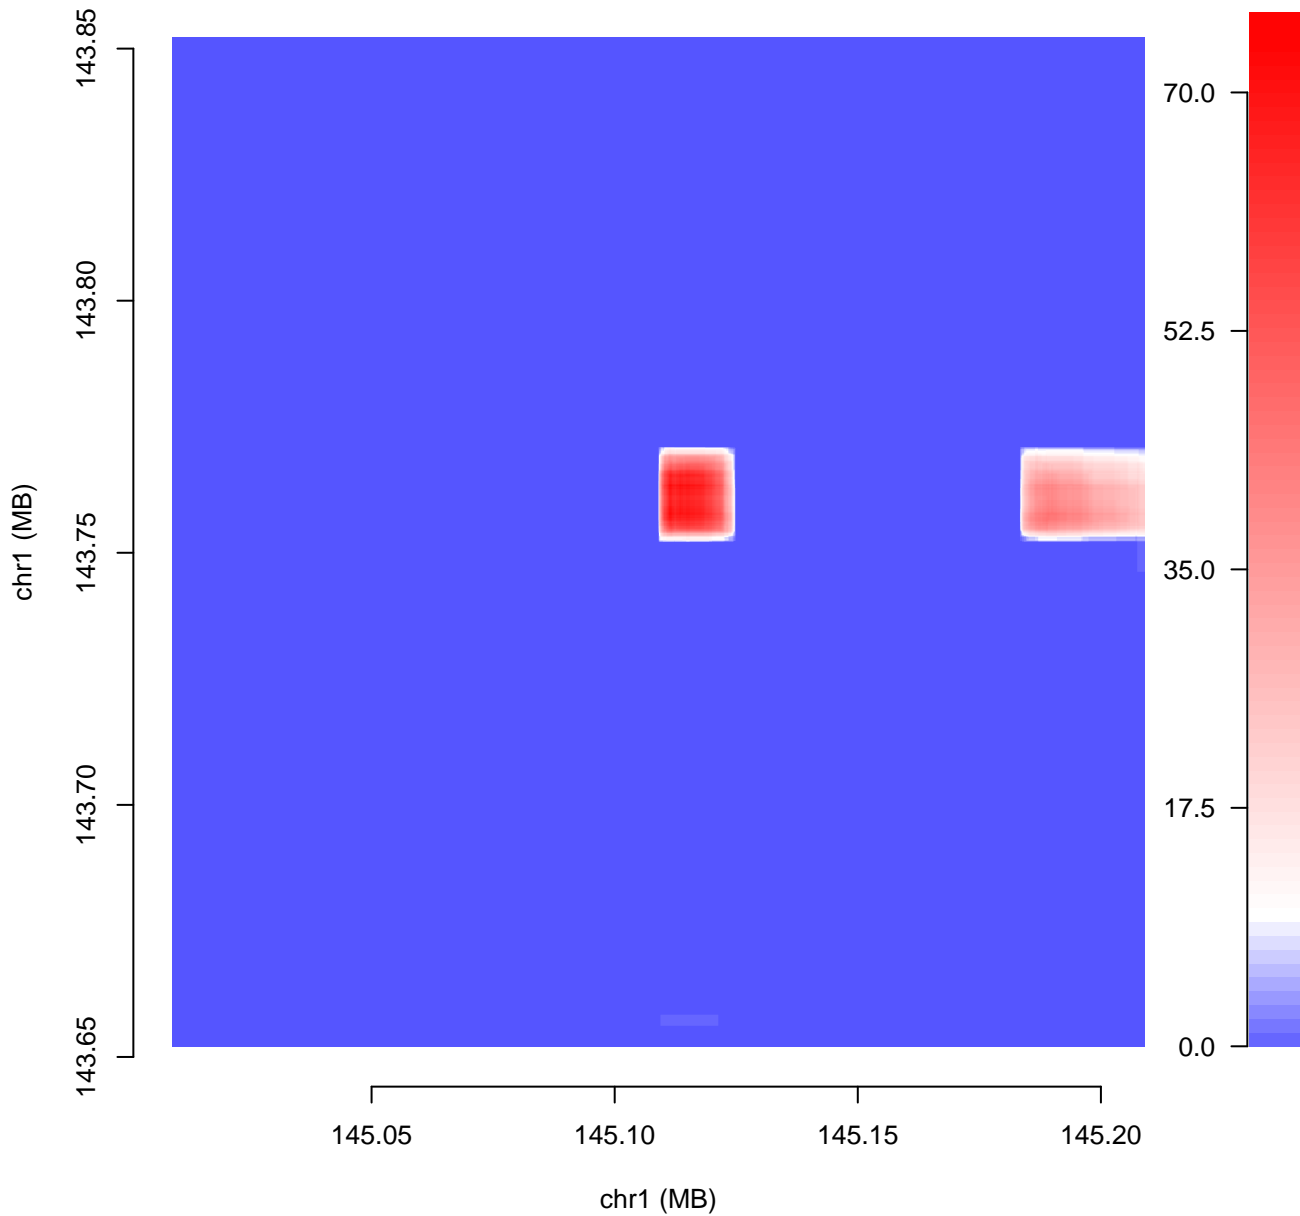

Supplement: Supplemental_Data.zip [file event_9.pdf › event_9.pdf]

Barcode

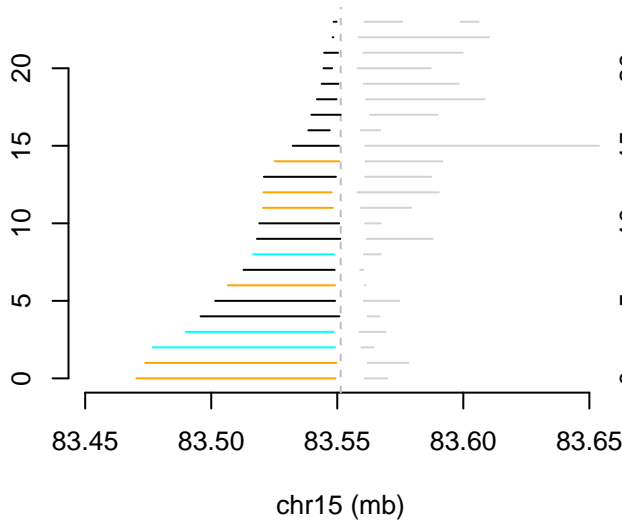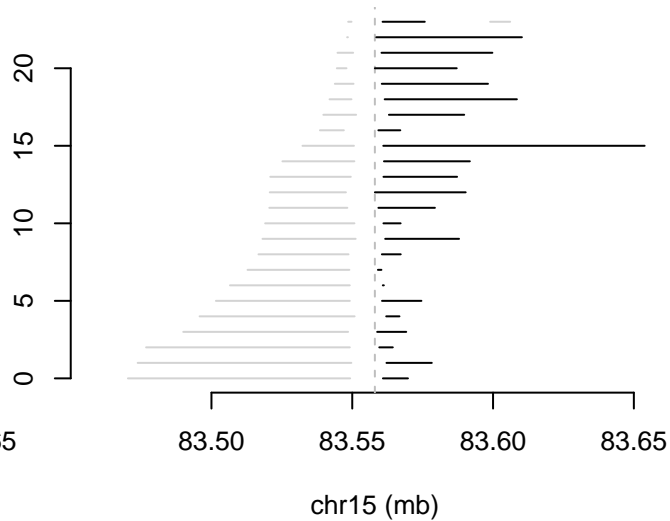

Copy number

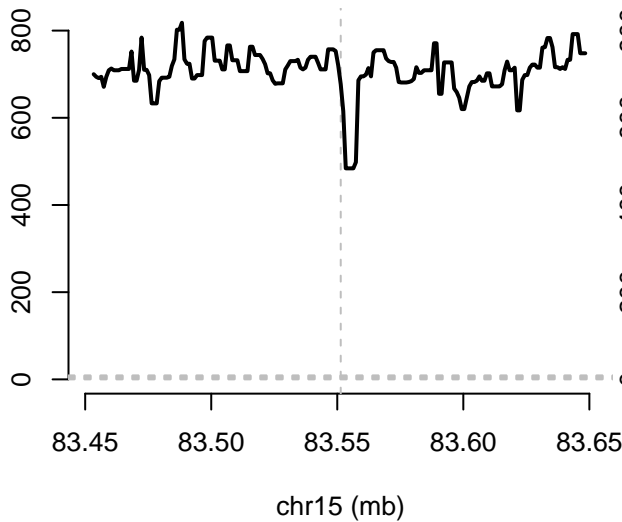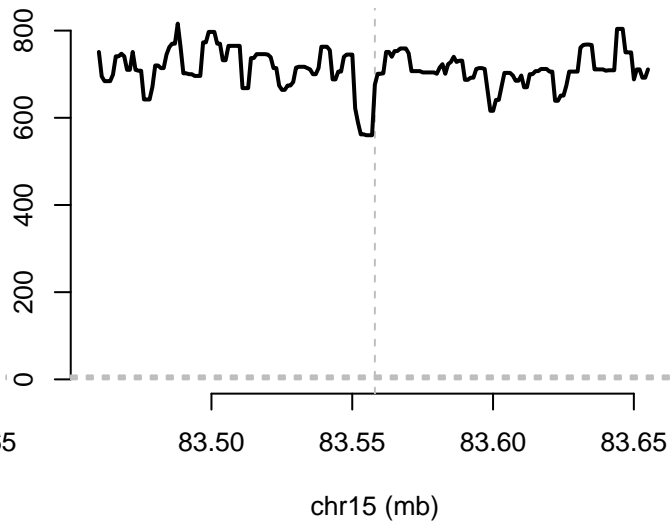

K562 chr15:83,558,031::chr15:83,551,376-+

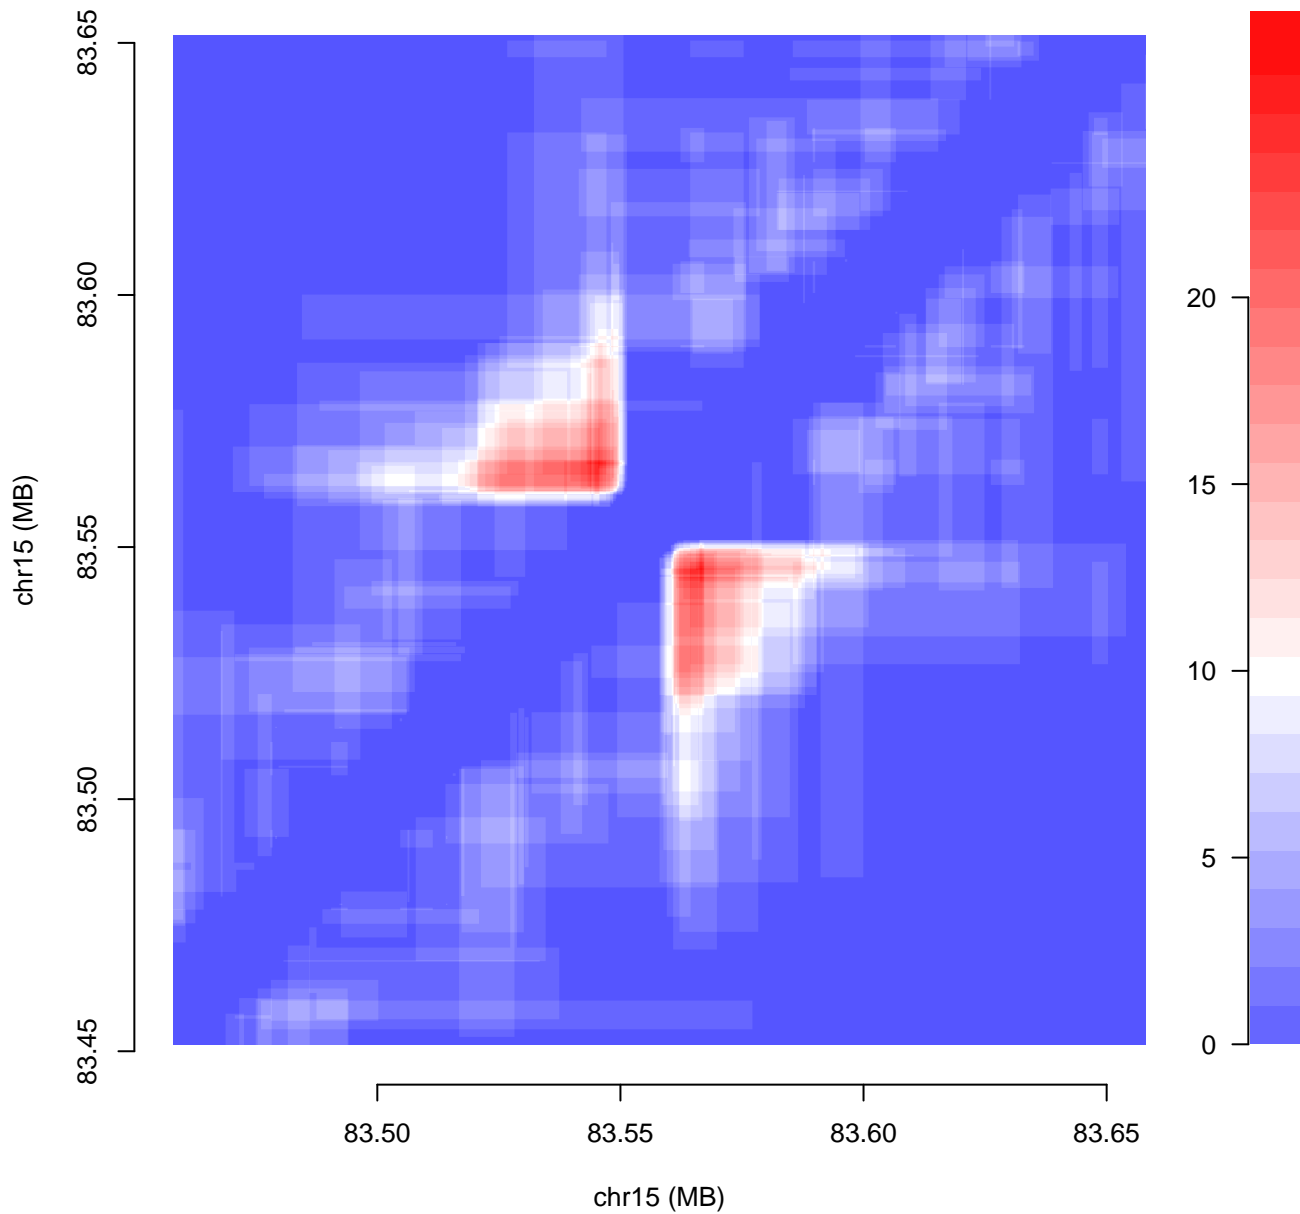

Supplement: Supplemental_Data.zip [file event_90.pdf › event_90.pdf]

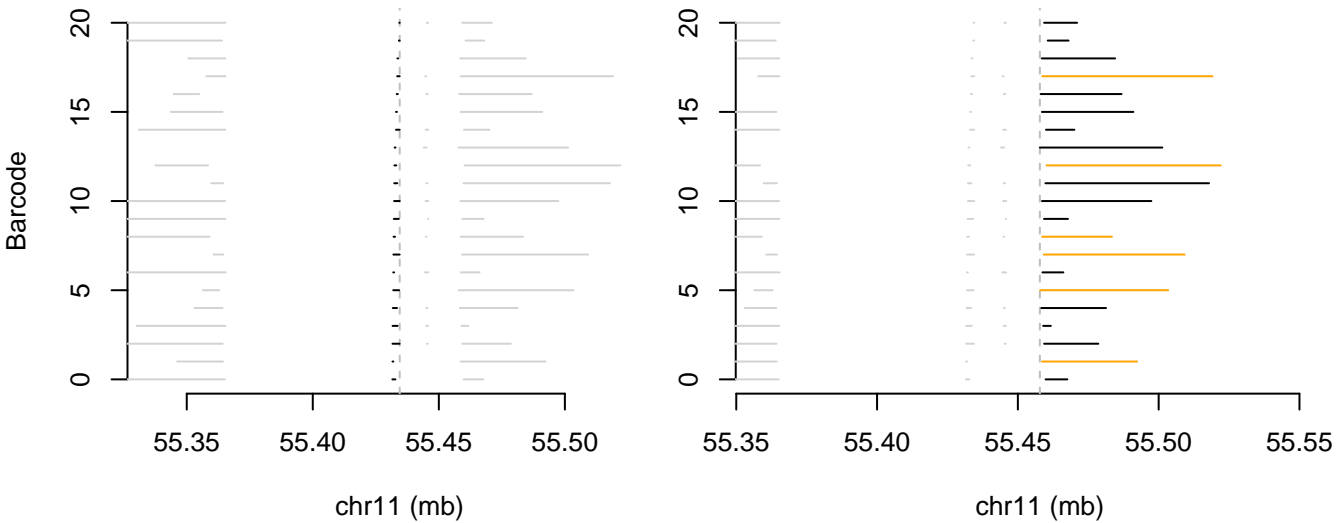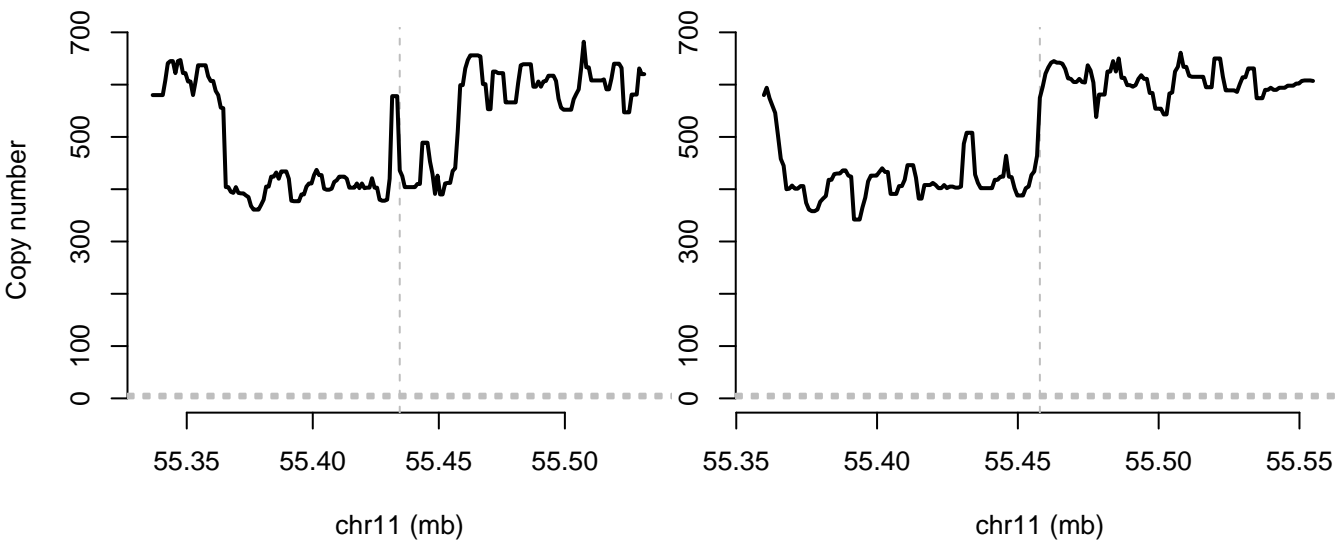

K562 chr11:55,457,816::chr11:55,434,498-+

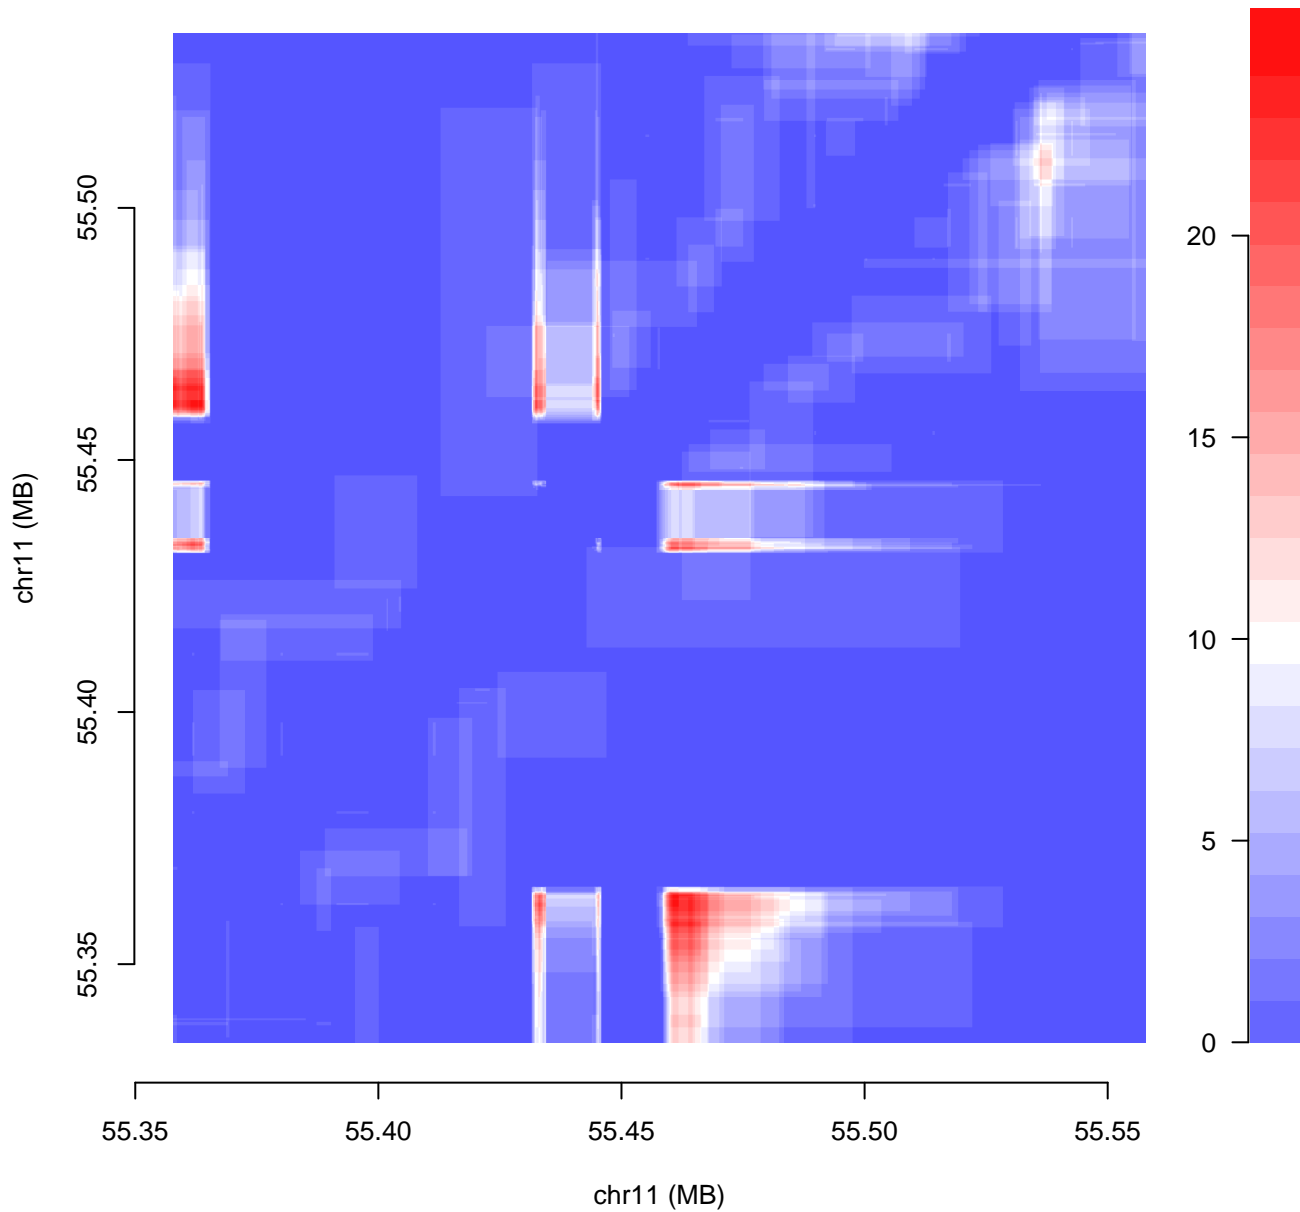

Supplement: Supplemental_Data.zip [file event_91.pdf › event_91.pdf]

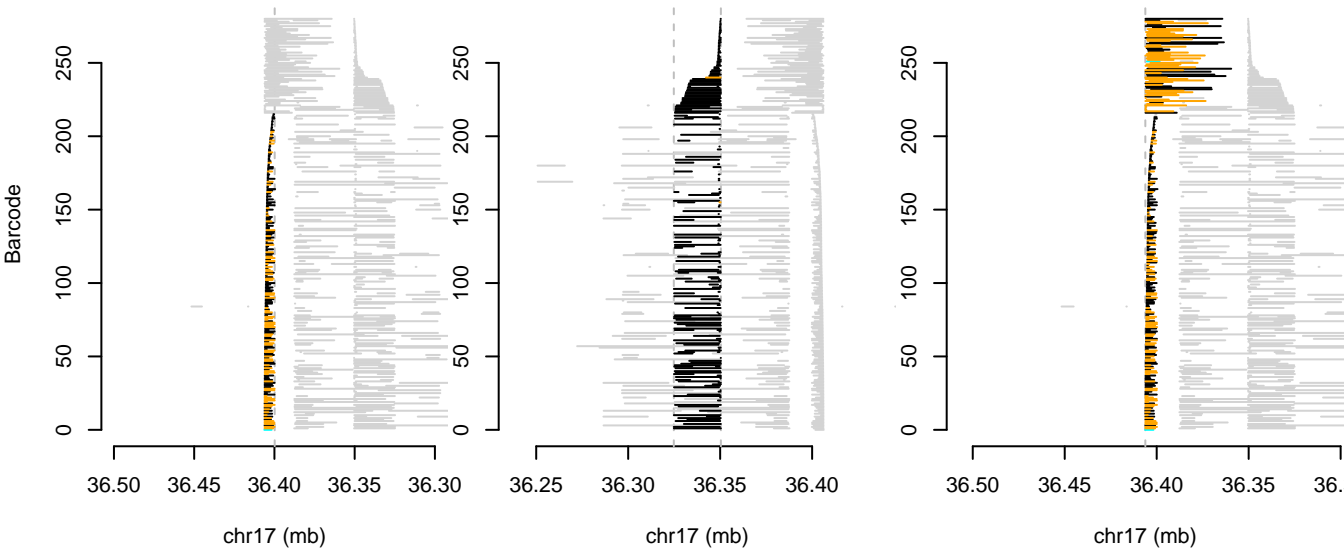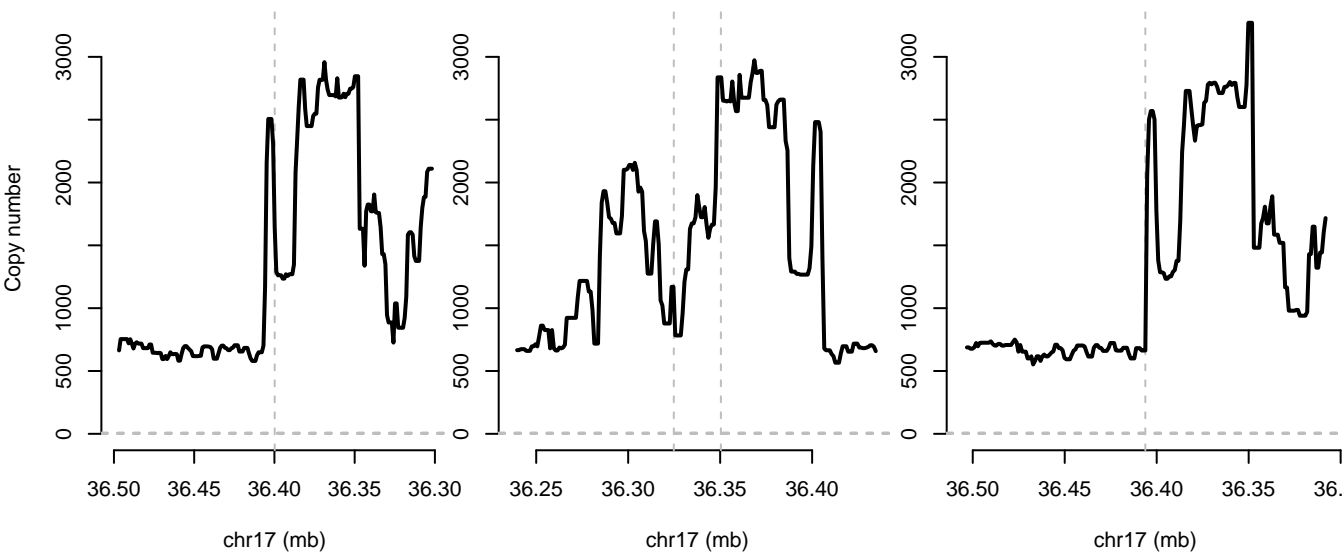

K562 chr17:36,399,833::chr17:36,324,800--

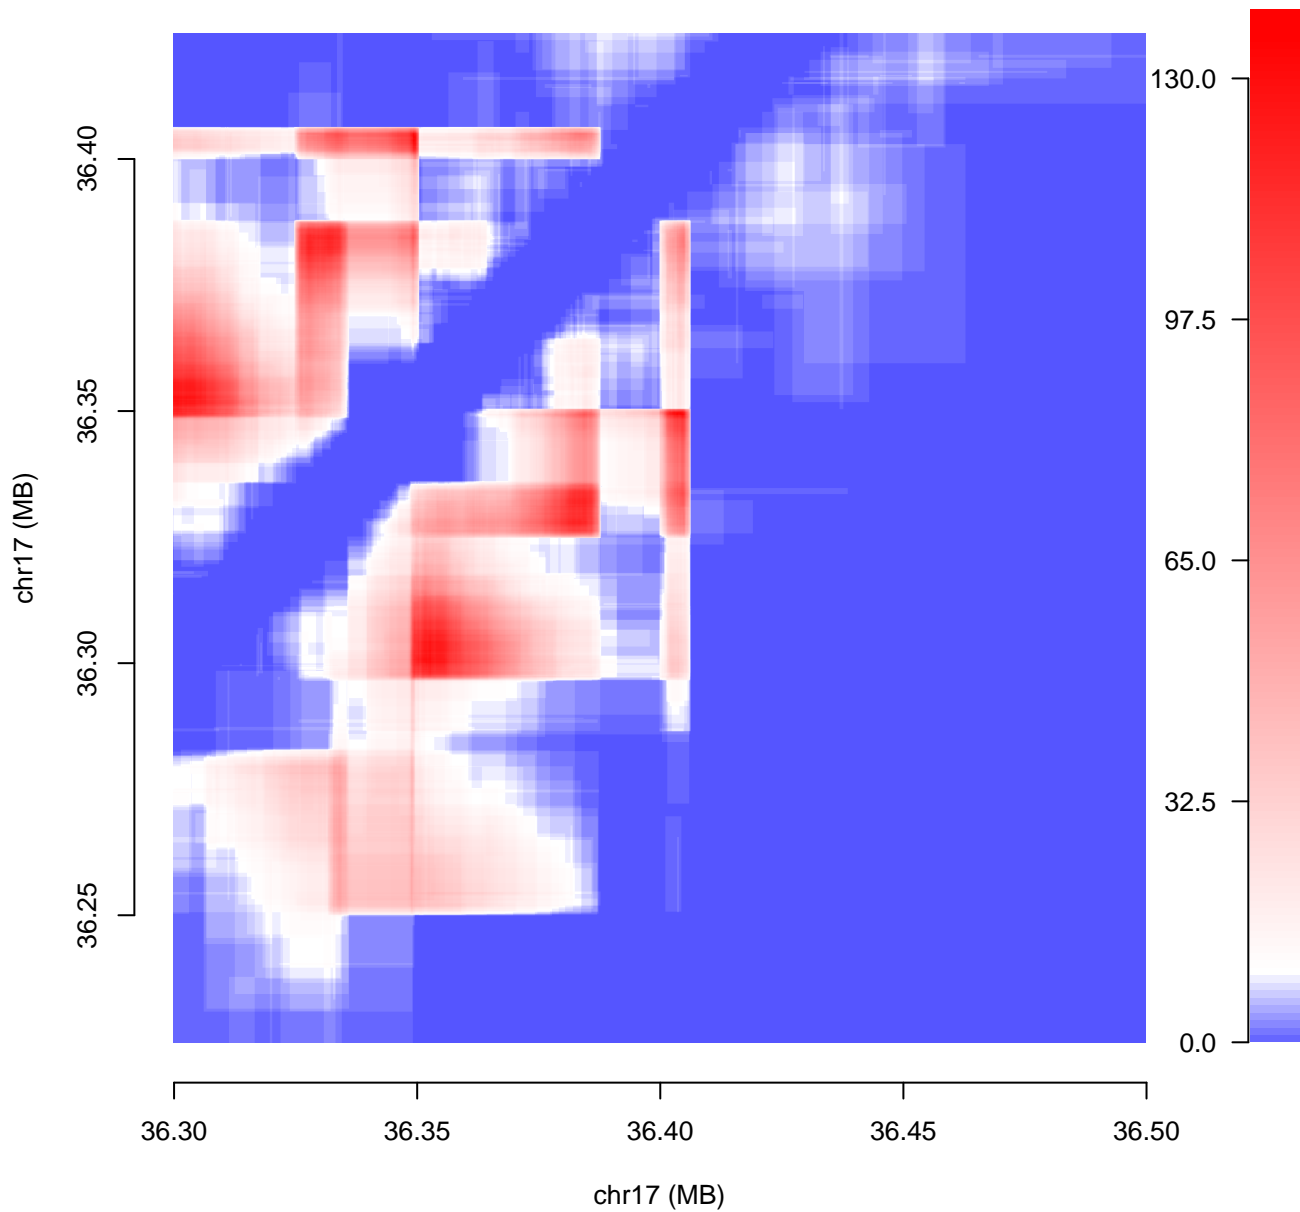

K562 chr17:36,324,800::chr17:36,350,387-+

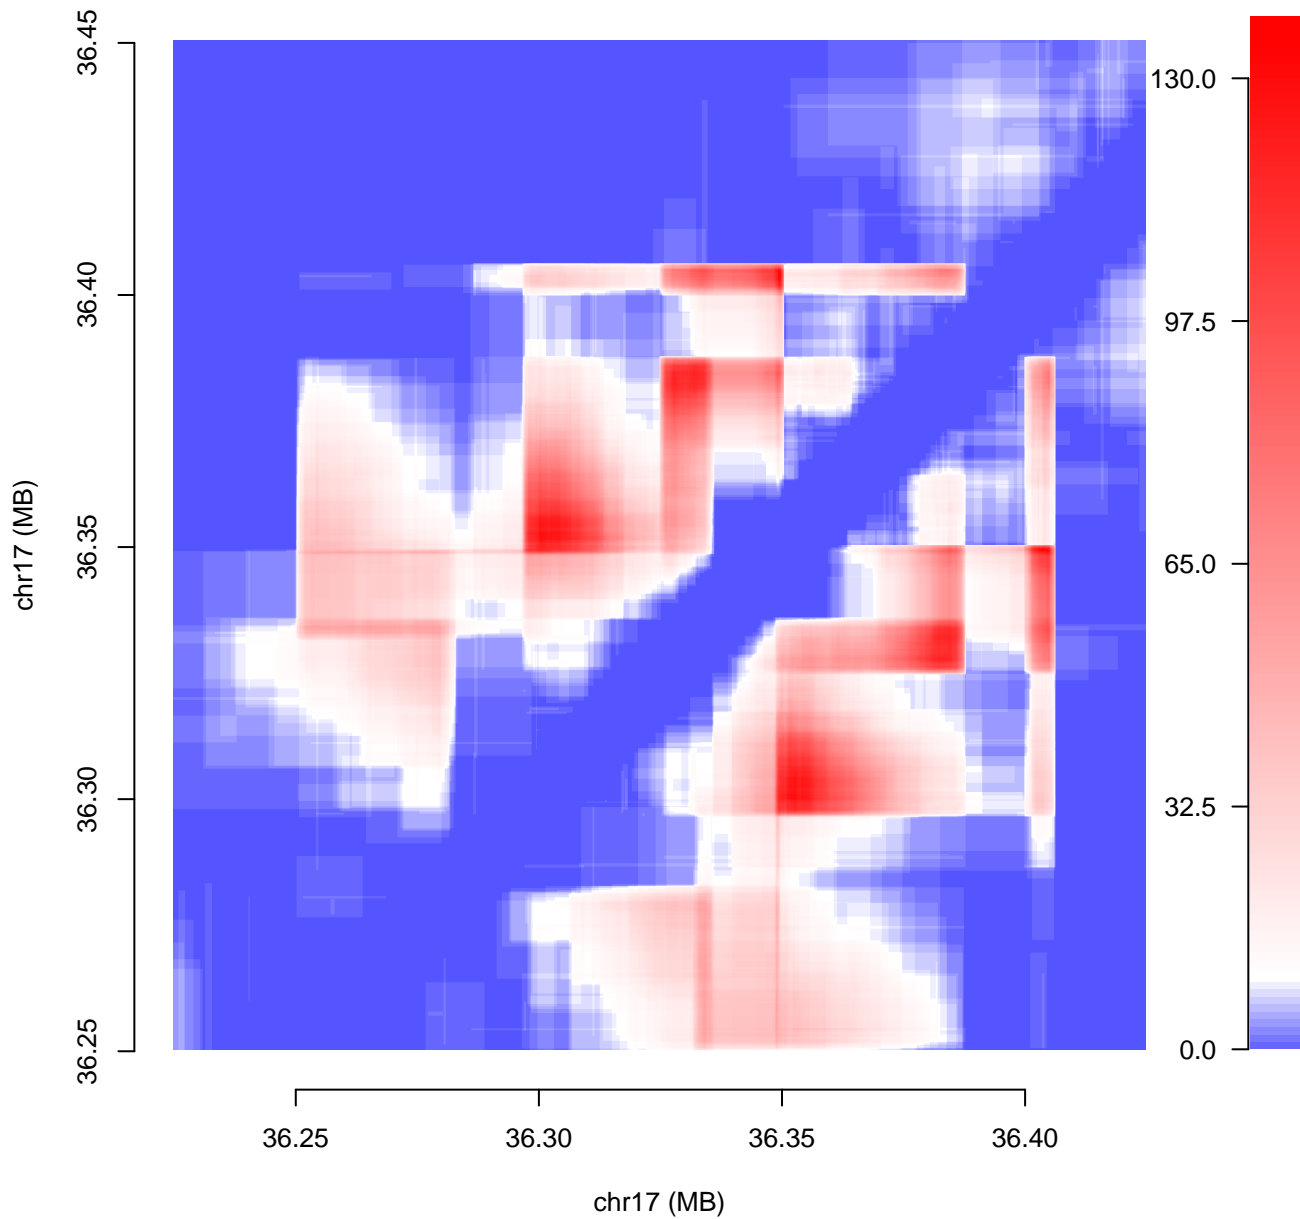

K562 chr17:36,406,169::chr17:36,350,387++

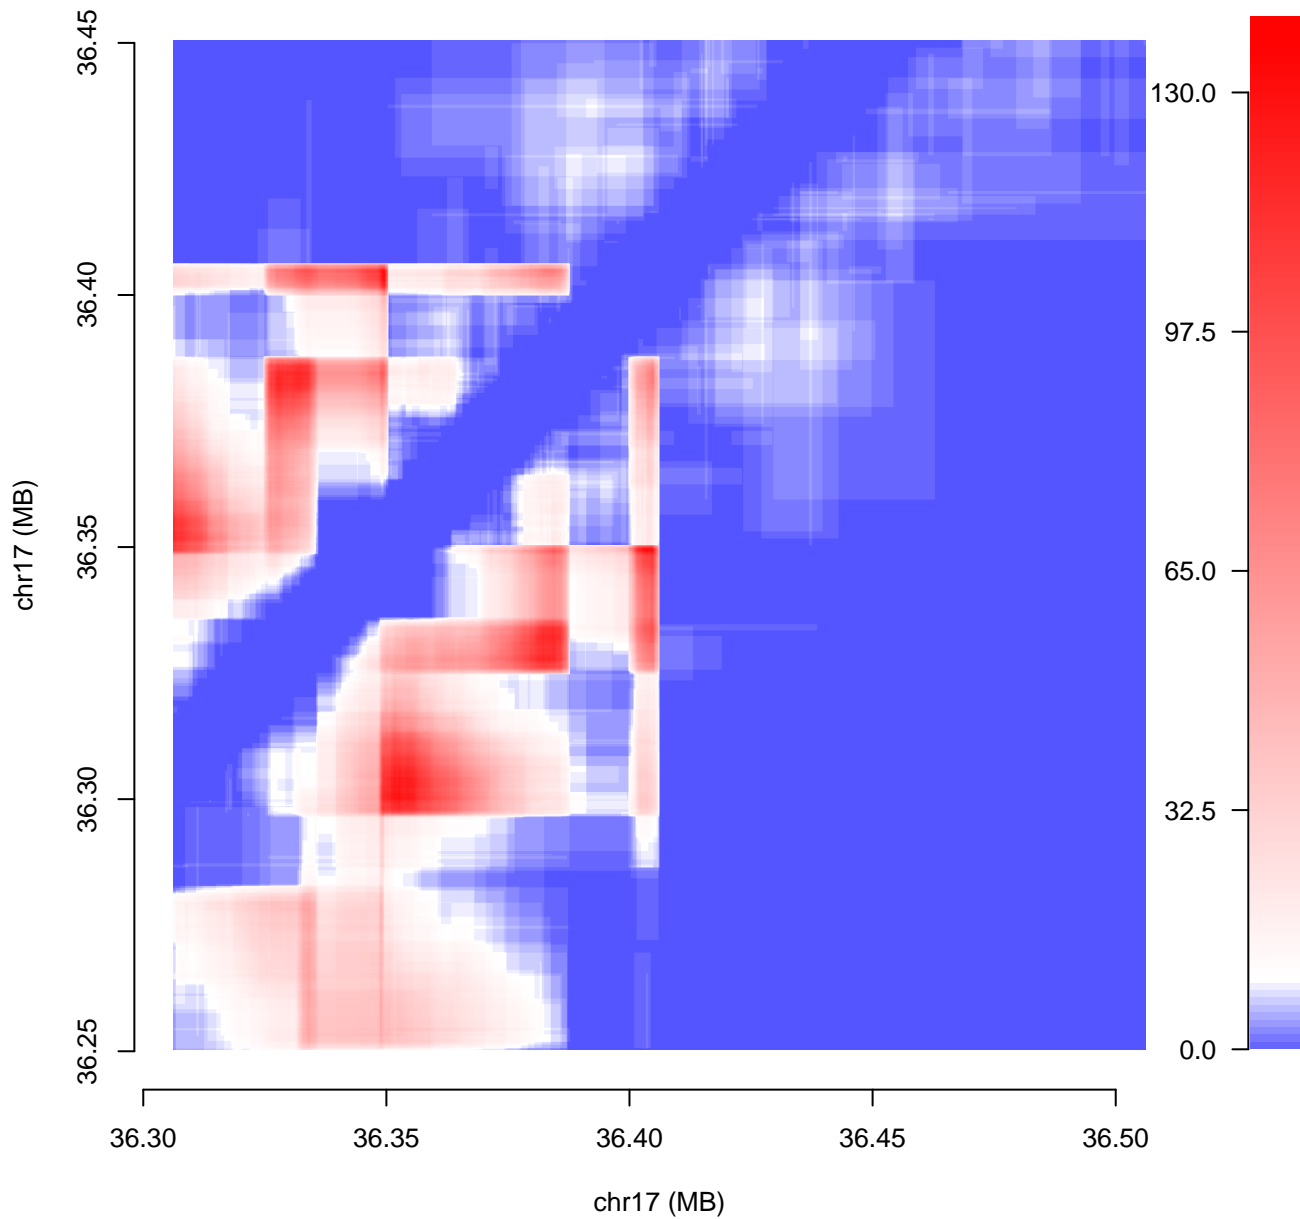

Supplement: Supplemental_Data.zip [file event_92.pdf › event_92.pdf]

Barcode

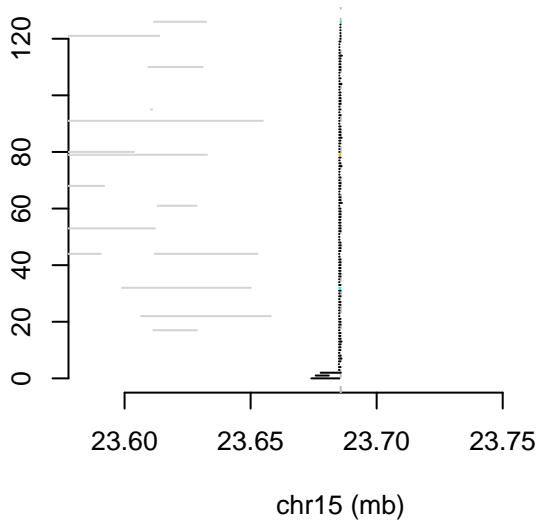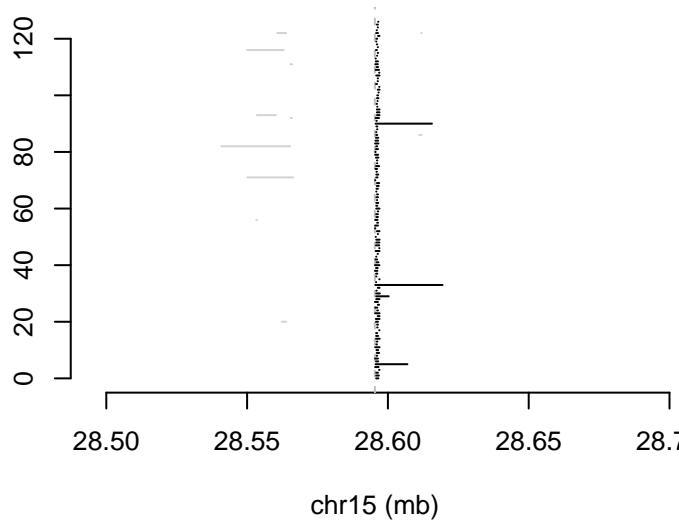

Copy number

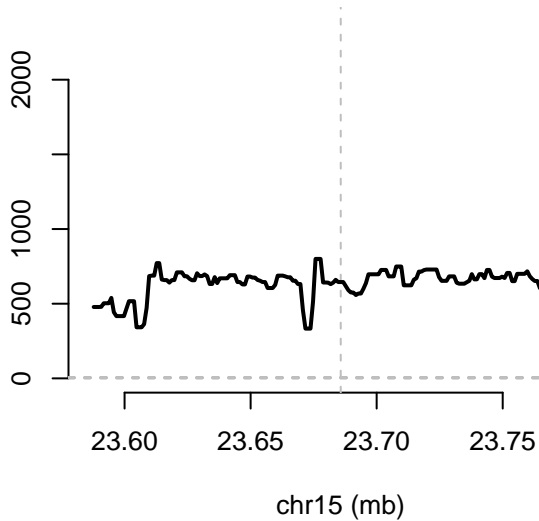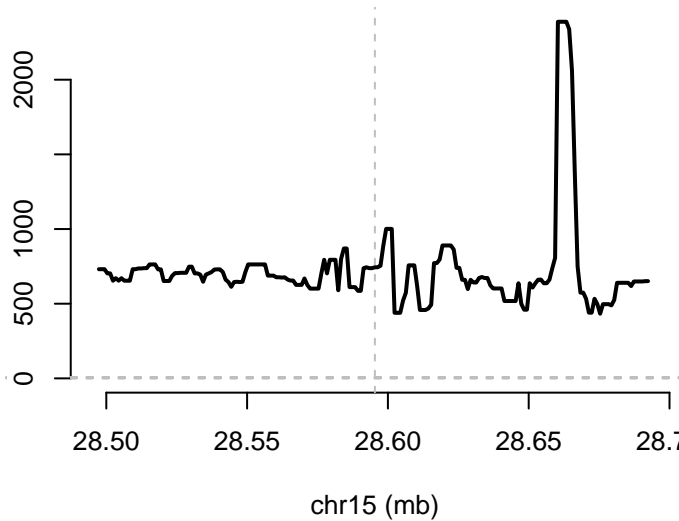

K562 chr15:23,685,751::chr15:28,595,370+-

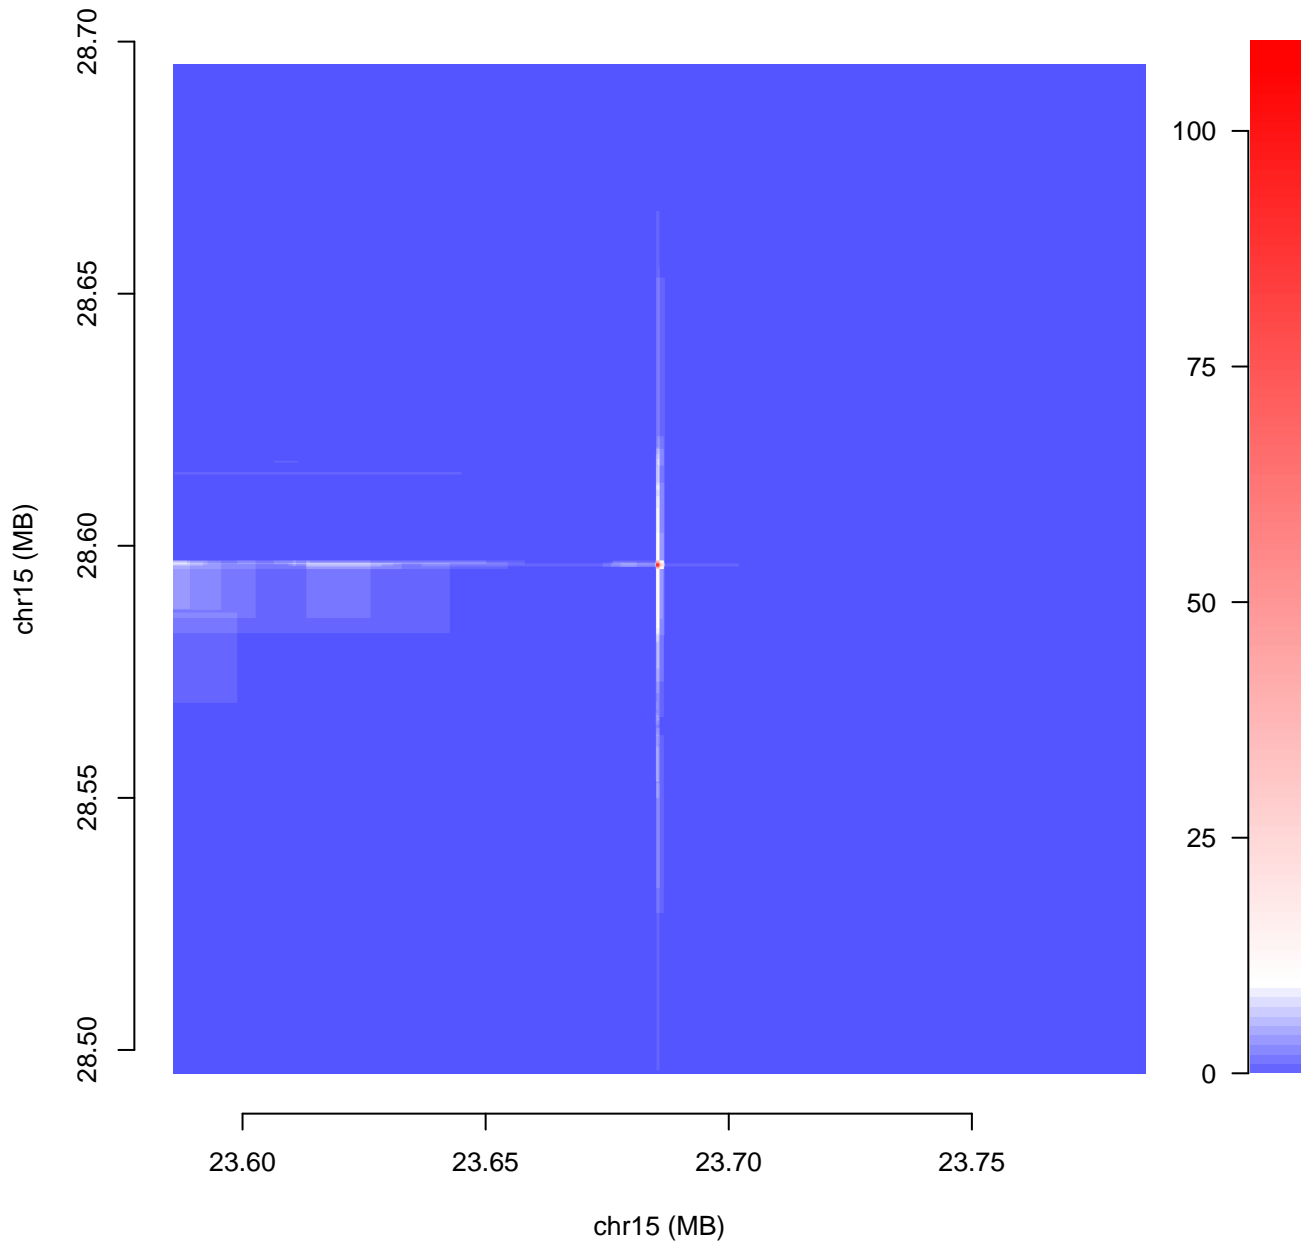

Supplement: Supplemental_Data.zip [file event_93.pdf › event_93.pdf]

Barcode

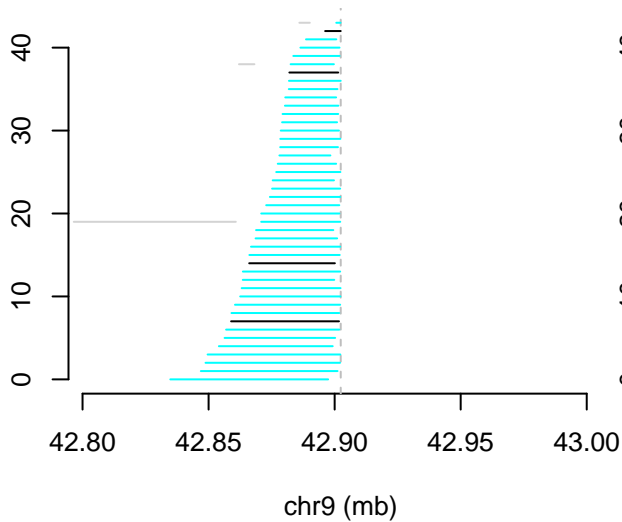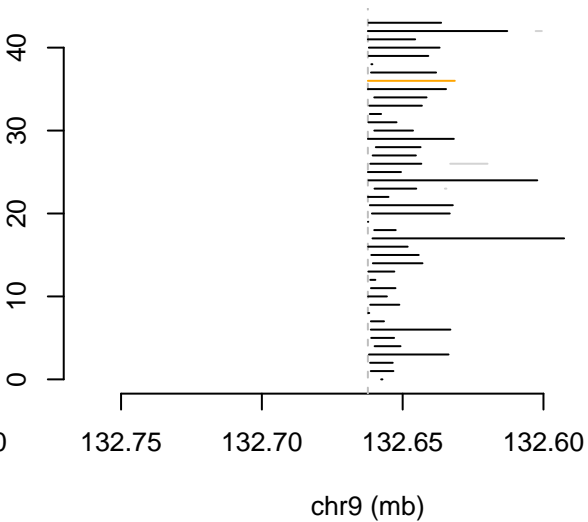

Copy number

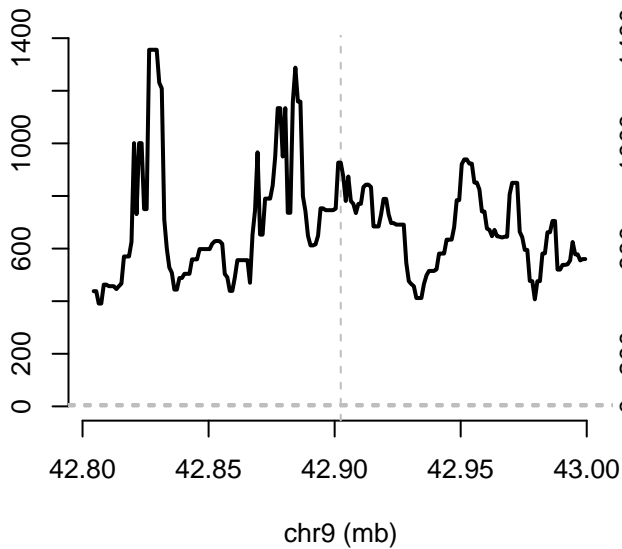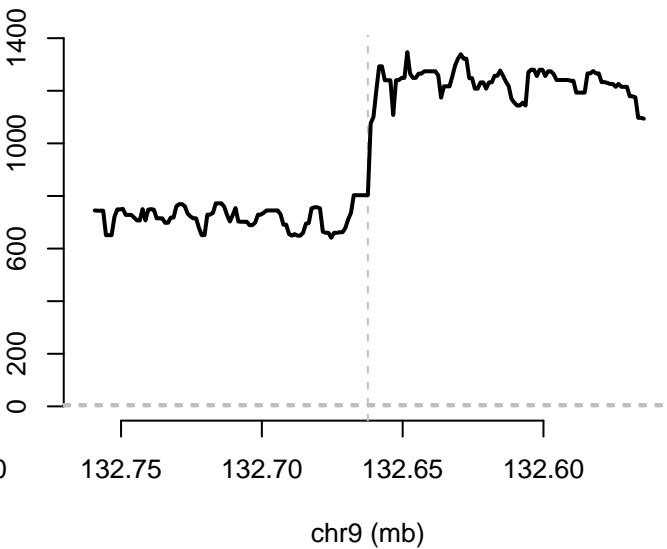

**K562 chr9:132,662,356::chr9:42,902,418++**

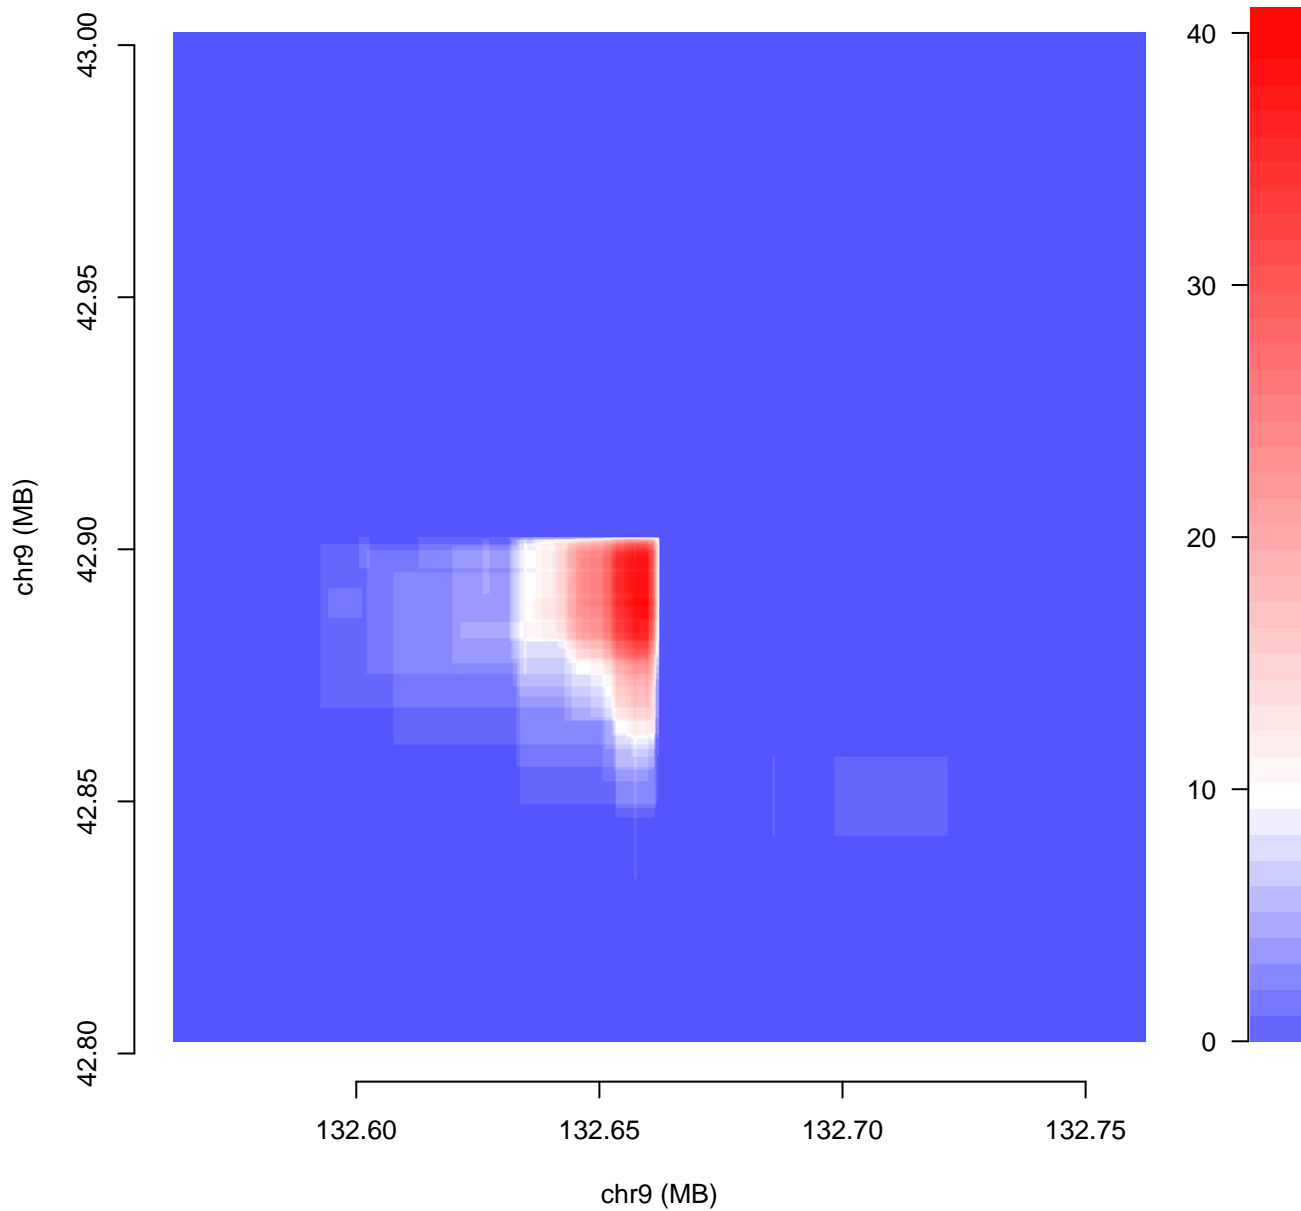

Supplement: Supplemental_Data.zip [file event_94.pdf › event_94.pdf]

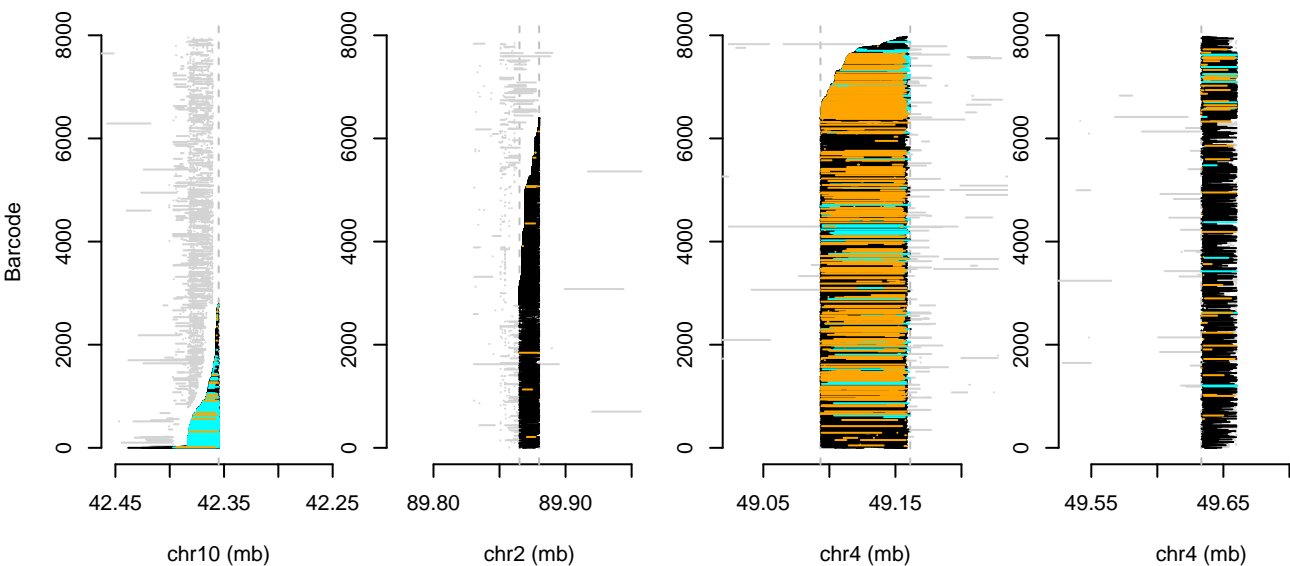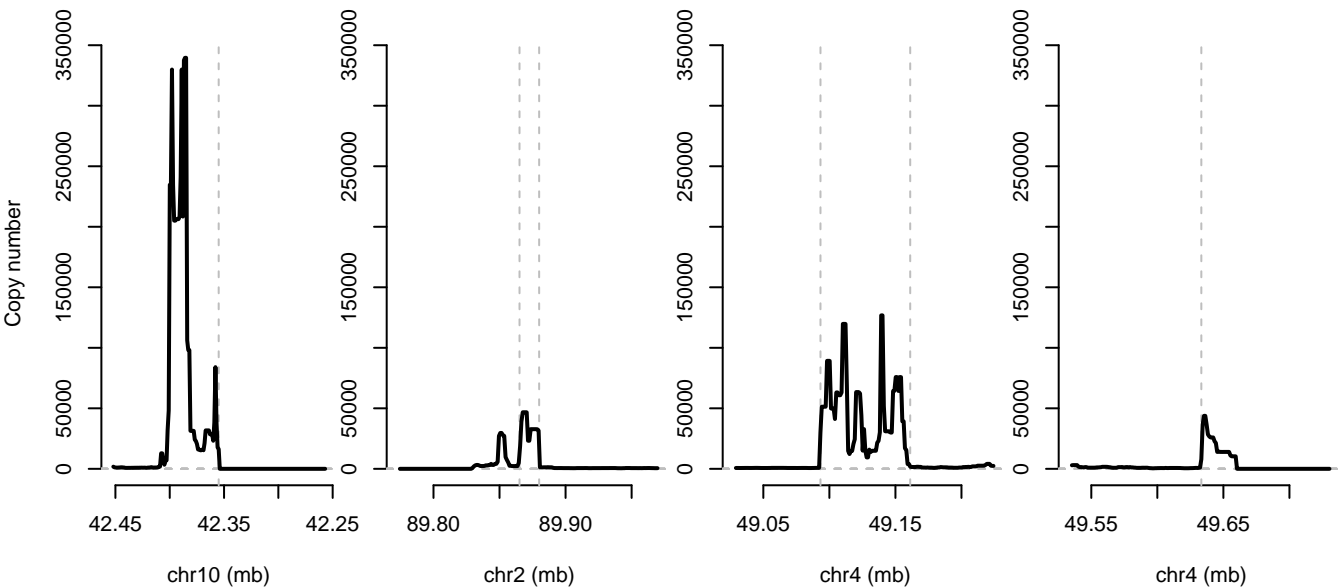

K562 chr4:49,161,186::chr4:49,093,260+-

chr4 (MB)

49.20  
49.15  
49.10  
49.05  
49.00

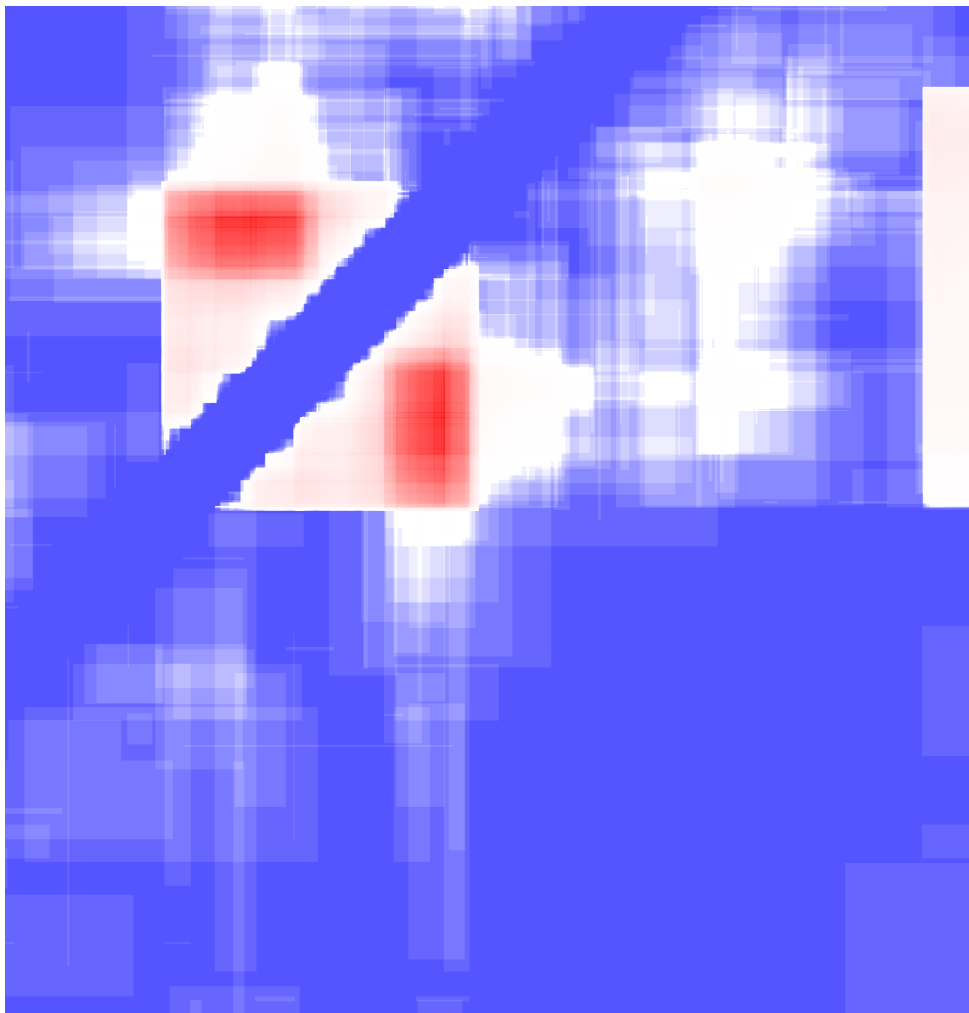

49.10

49.15

49.20

49.25

chr4 (MB)

1300  
975  
650  
325  
0

K562 chr4:49,161,186::chr4:49,633,313+-

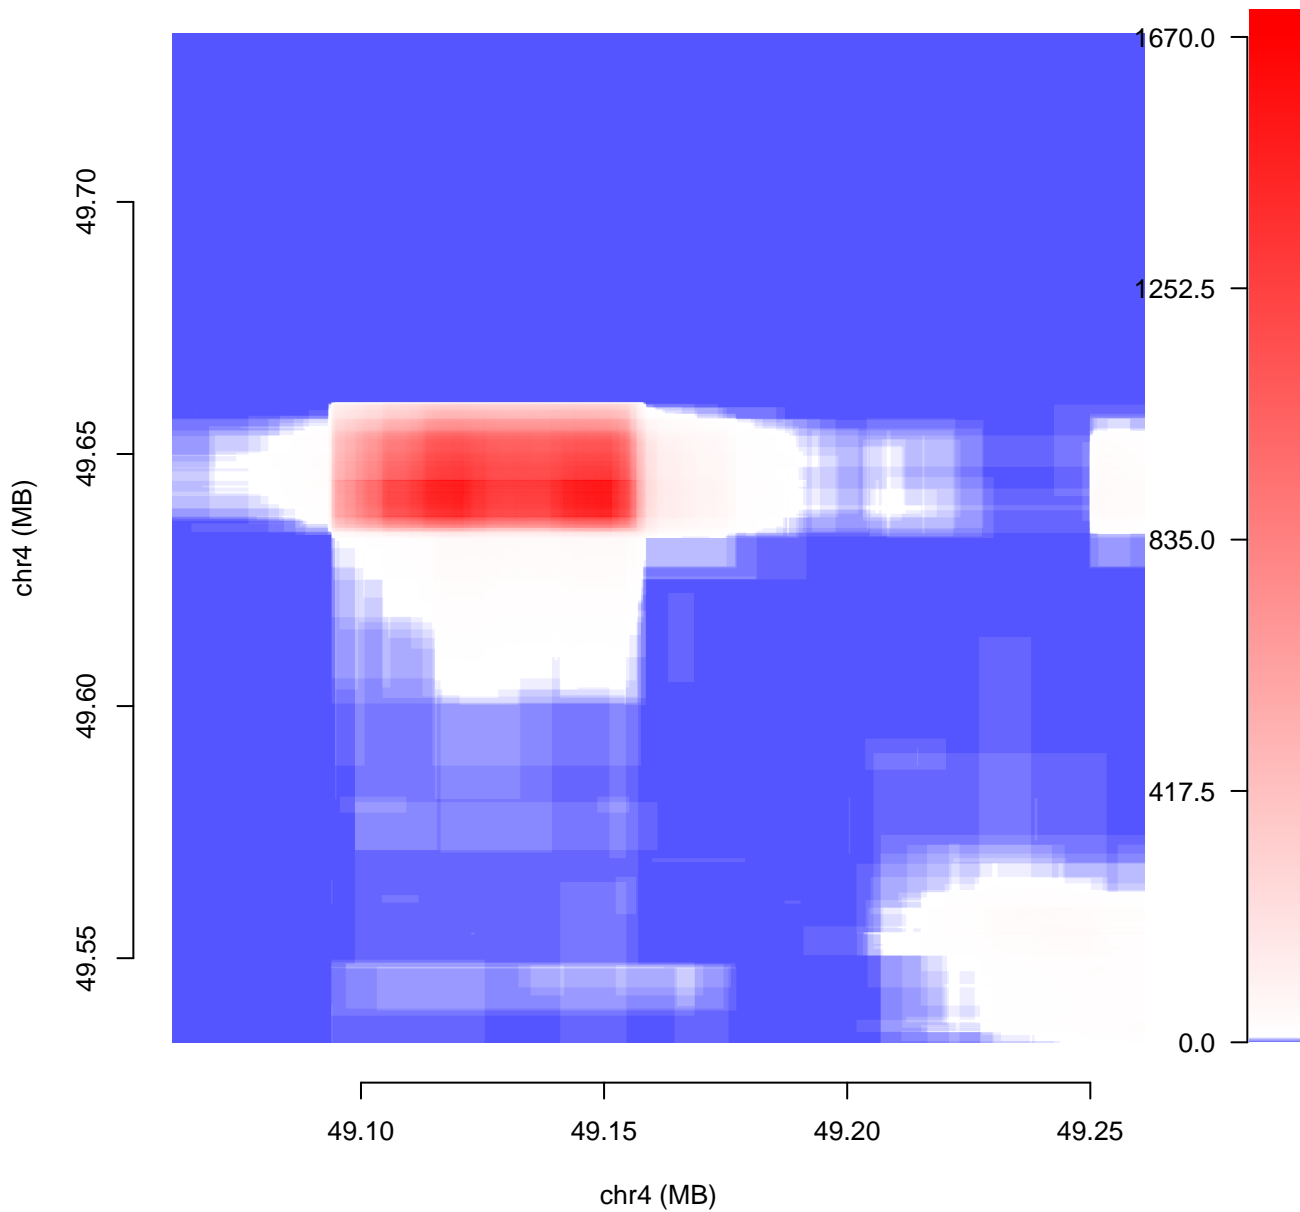

K562 chr2:89,880,003::chr4:49,093,260+-

chr4 (MB)

49.20  
49.15  
49.10  
49.05  
49.00

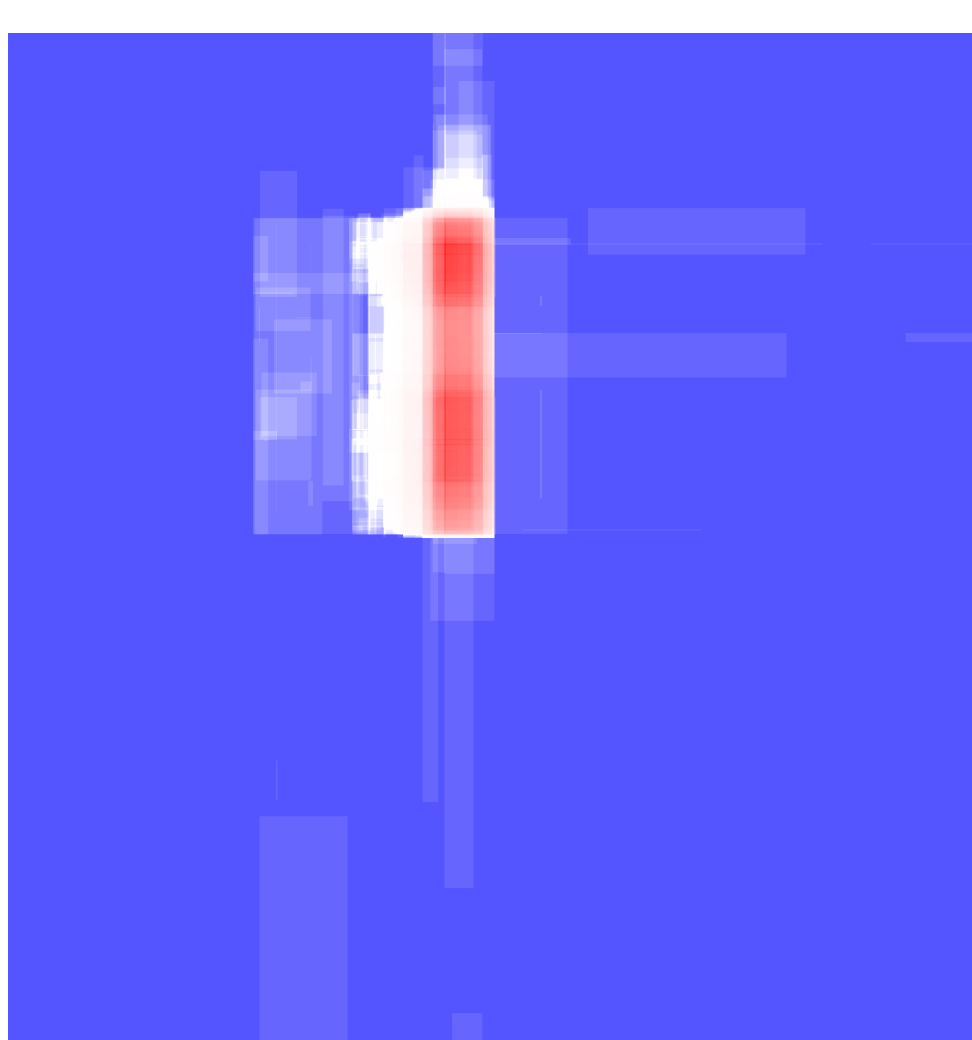

1120  
840  
560  
280  
0

89.80

89.85

89.90

89.95

chr2 (MB)

K562 chr2:89,880,003::chr2:89,865,147+-

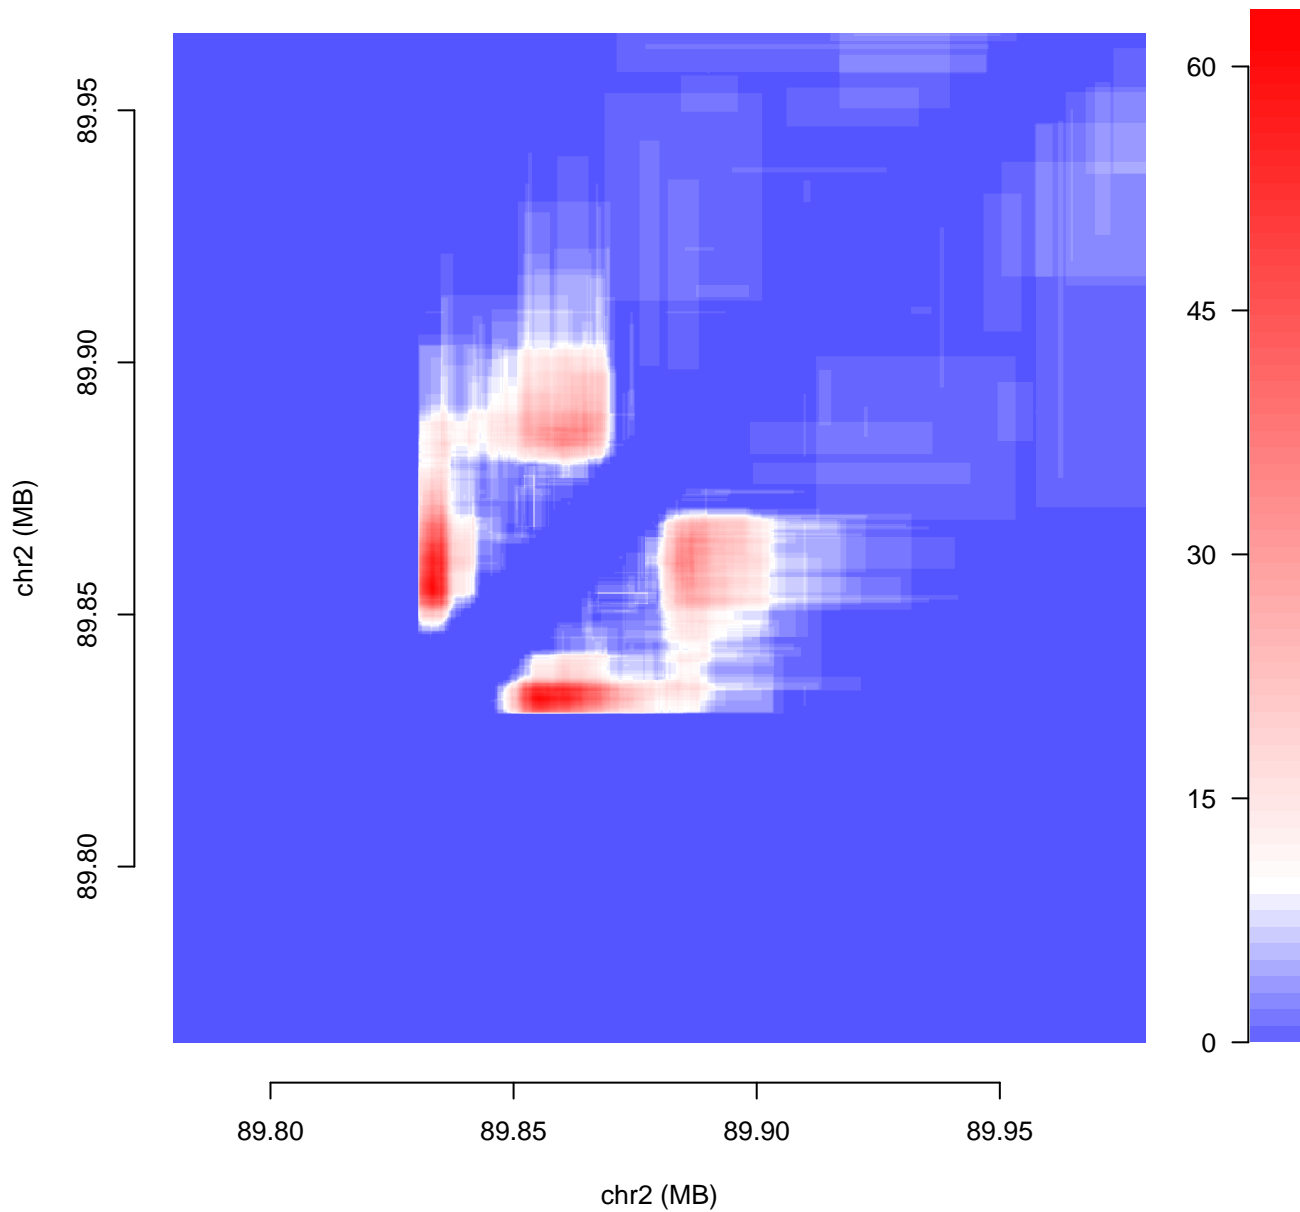

K562 chr2:89,865,147::chr10:42,354,933---

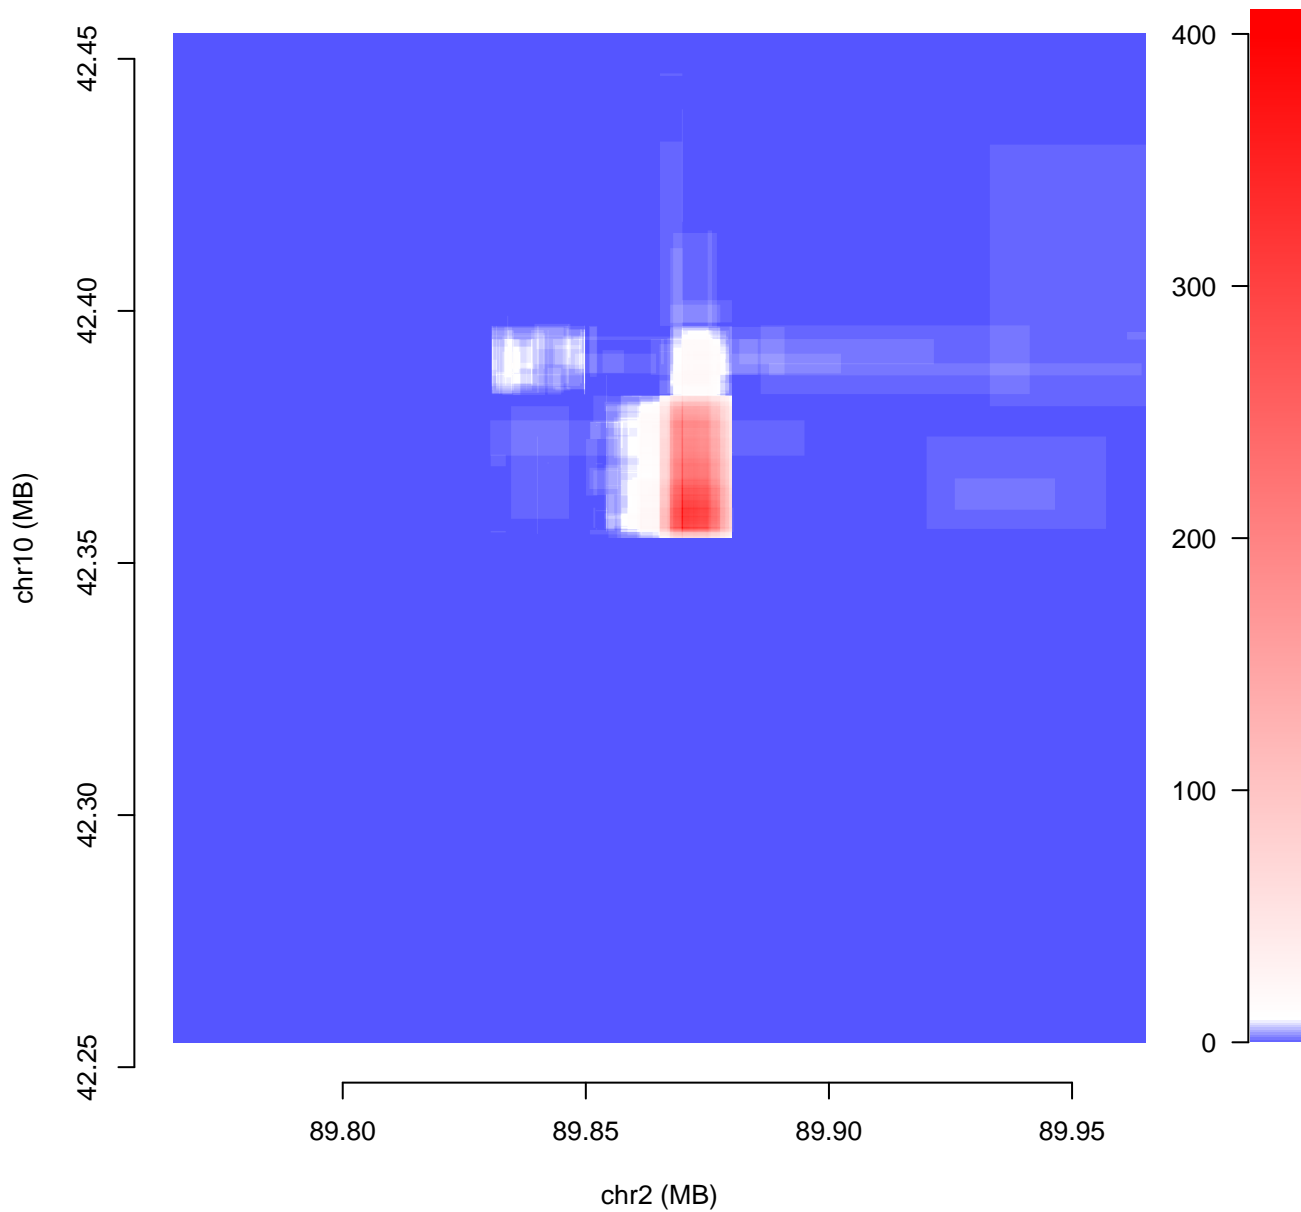

Supplement: Supplemental_Data.zip [file event_95.pdf › event_95.pdf]

Barcode

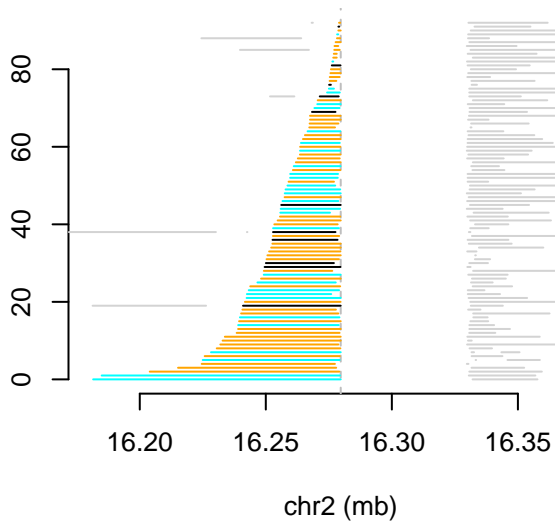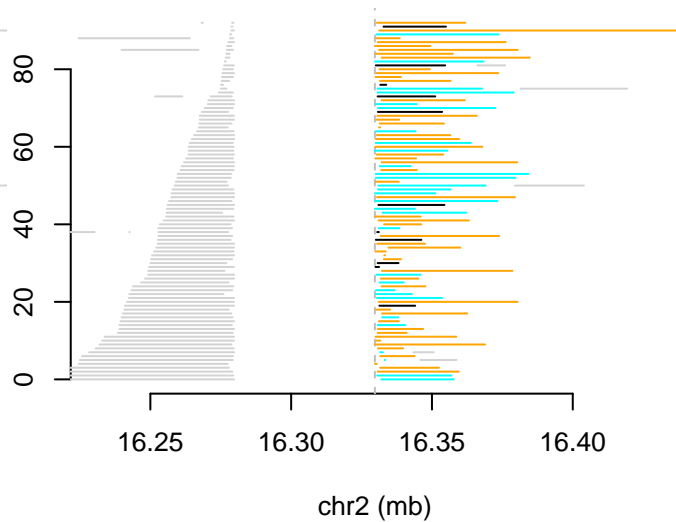

Copy number

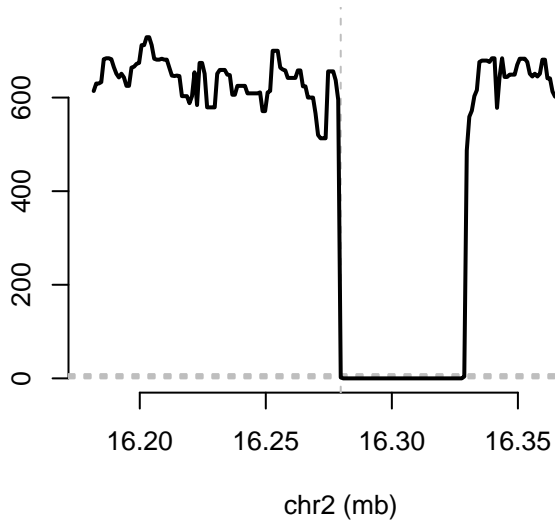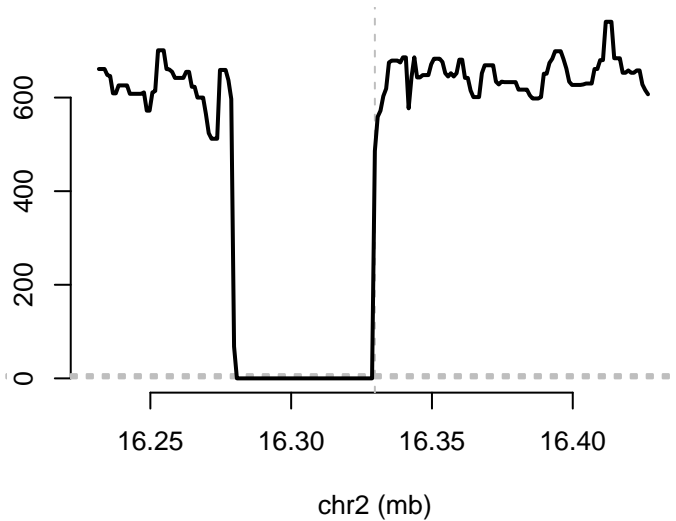

K562 chr2:16,329,723::chr2:16,279,725--+

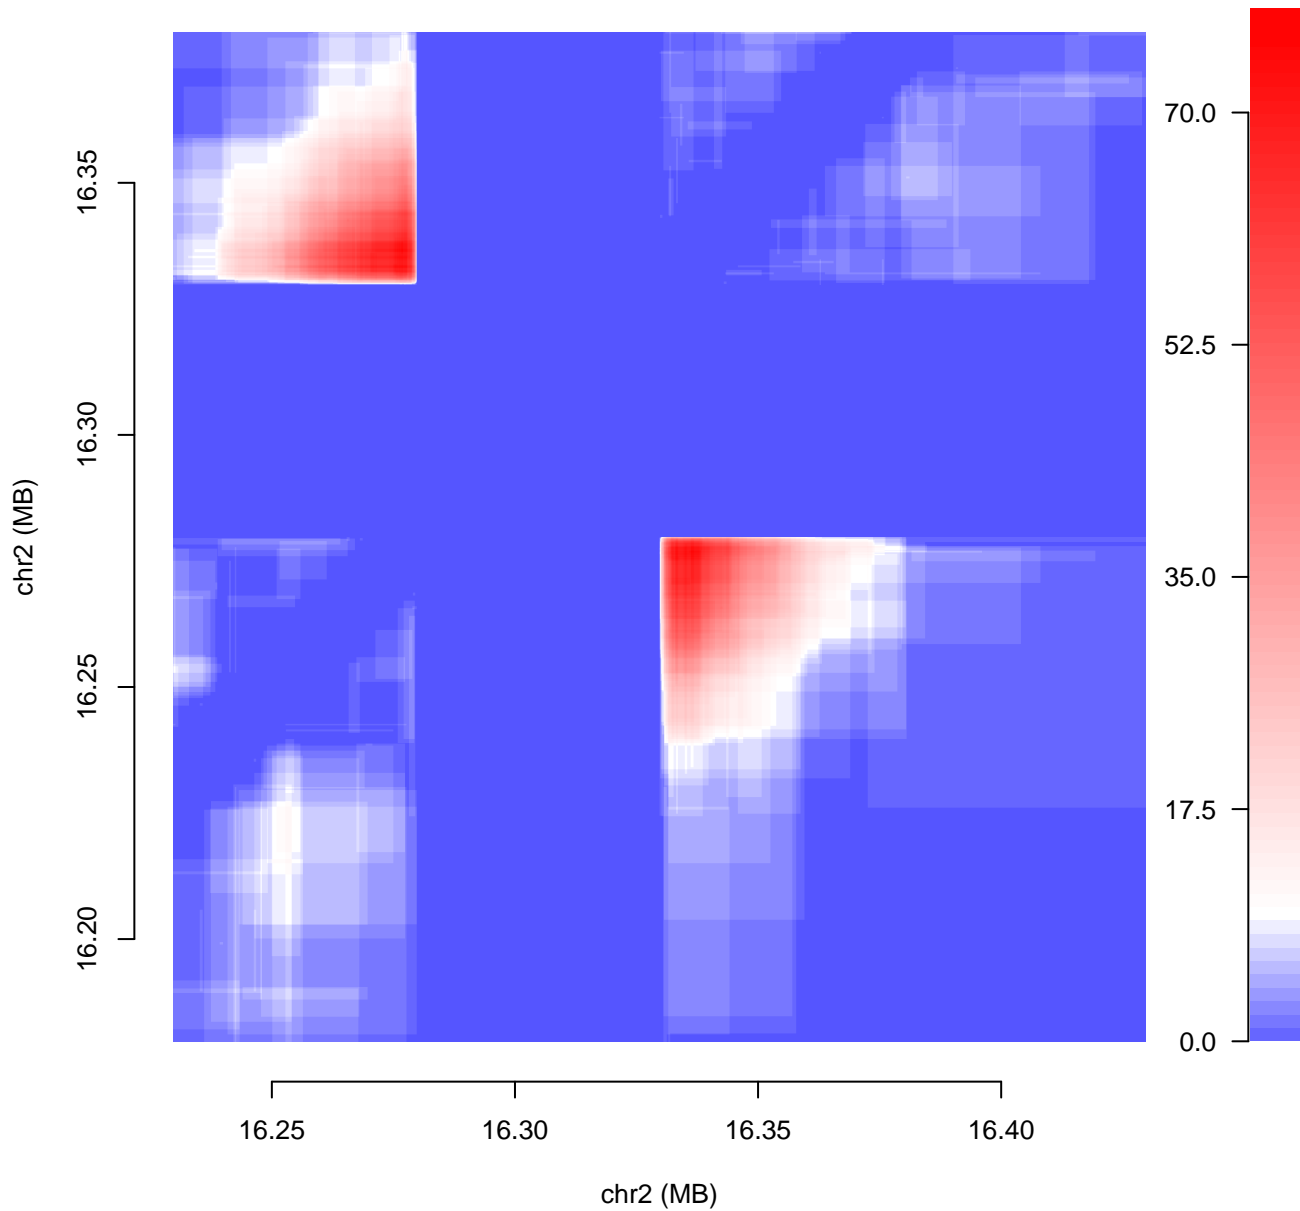

Supplement: Supplemental_Data.zip [file event_96.pdf › event_96.pdf]

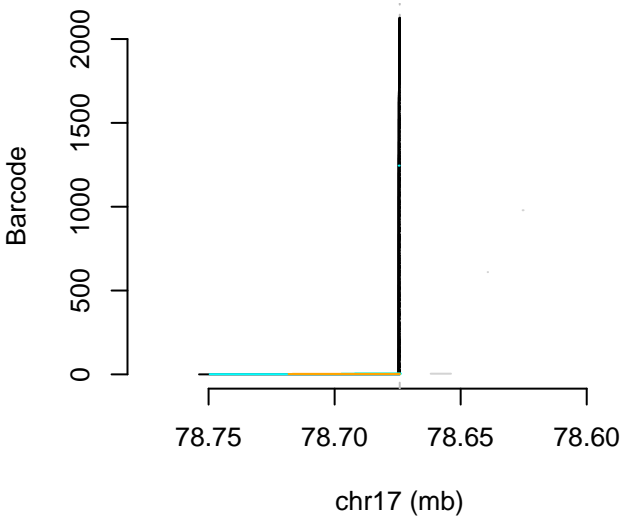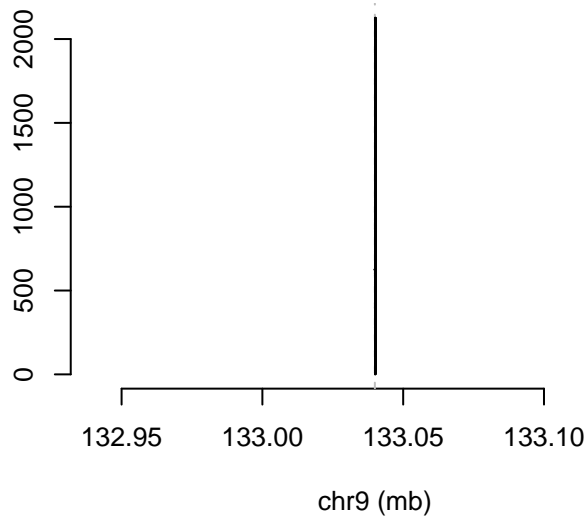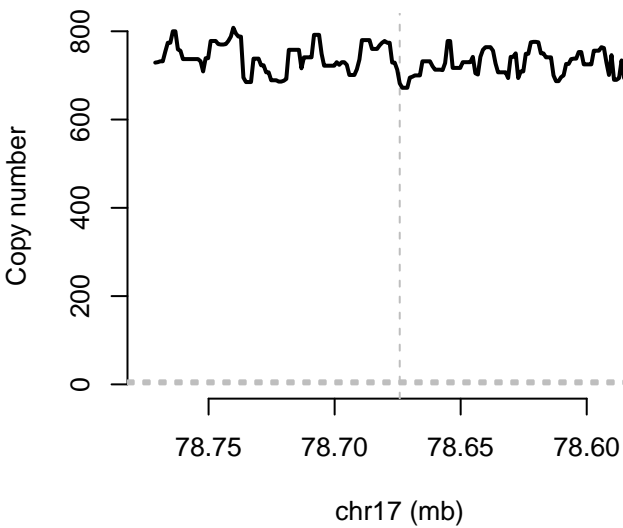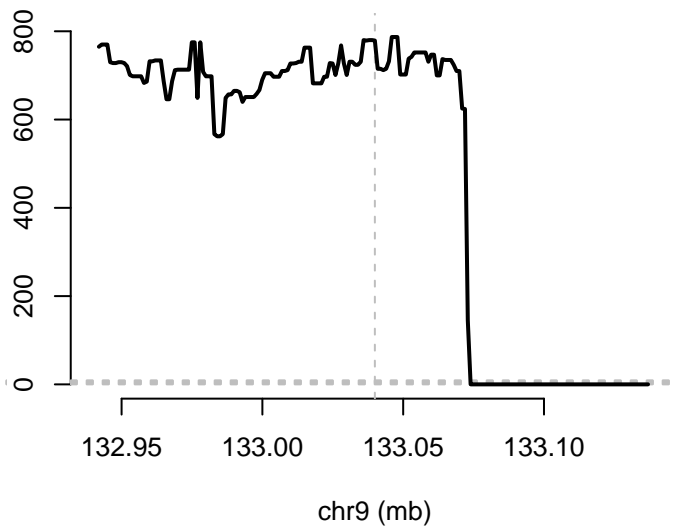

K562 chr17:78,674,169::chr9:133,039,945--

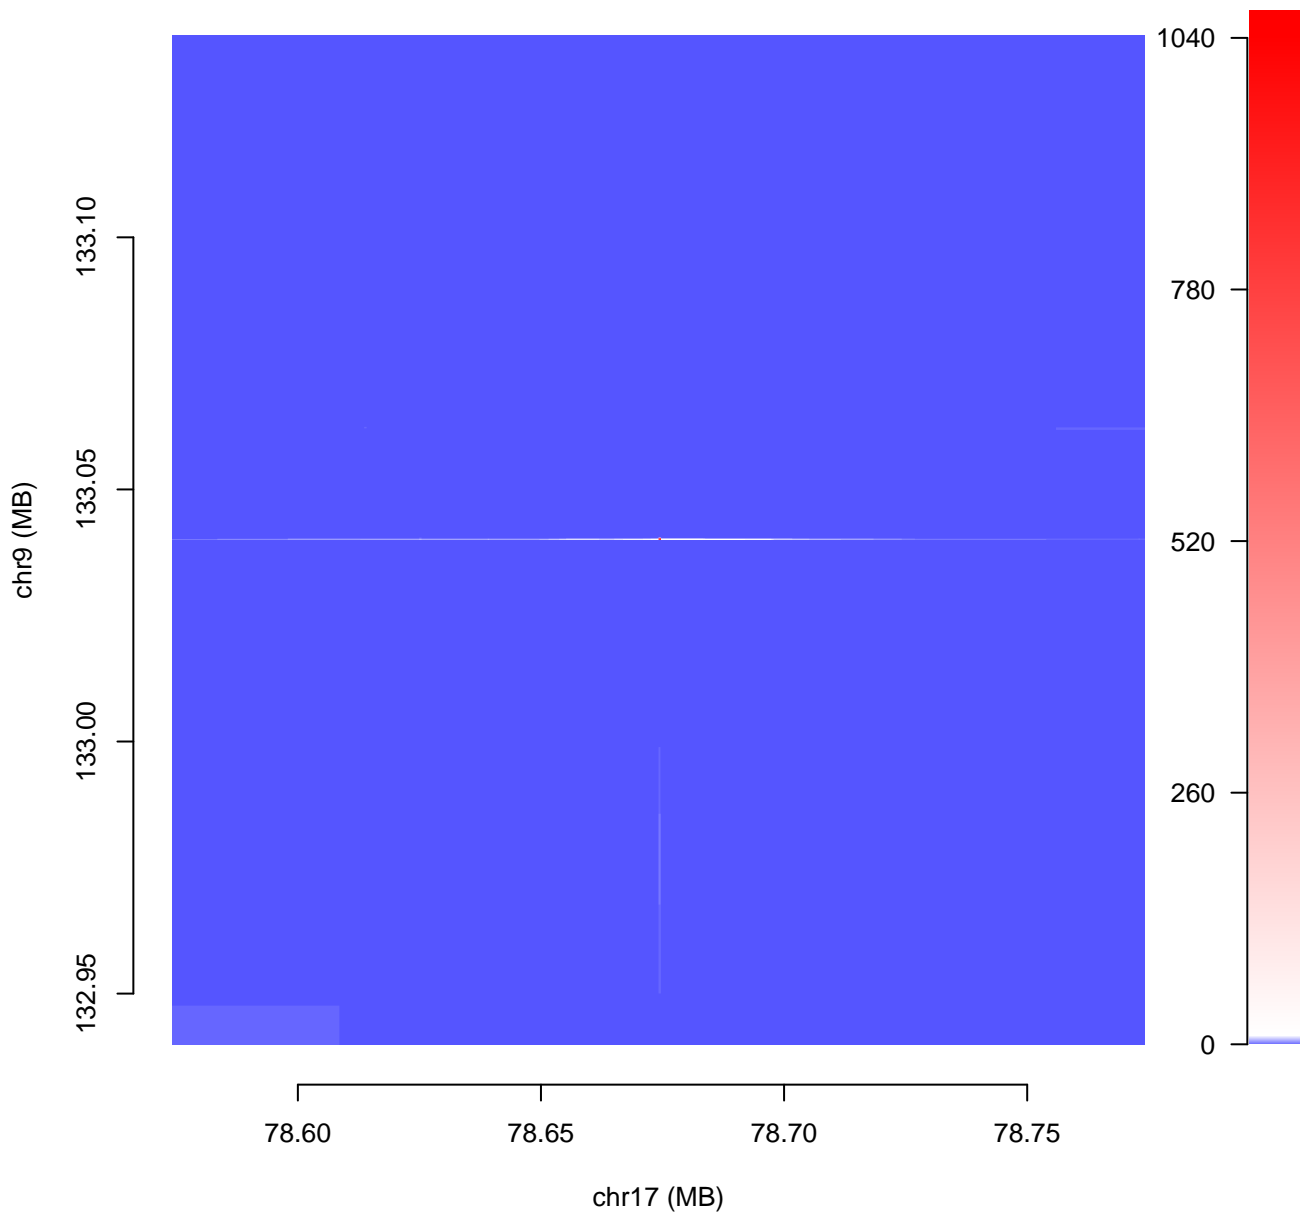

Supplement: Supplemental_Data.zip [file event_97.pdf › event_97.pdf]

Barcode

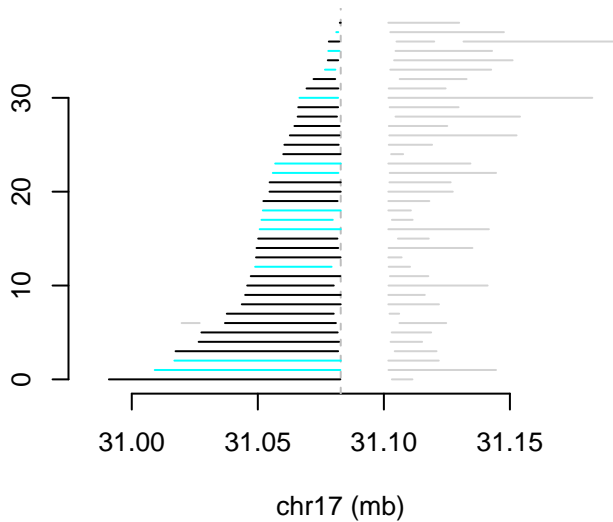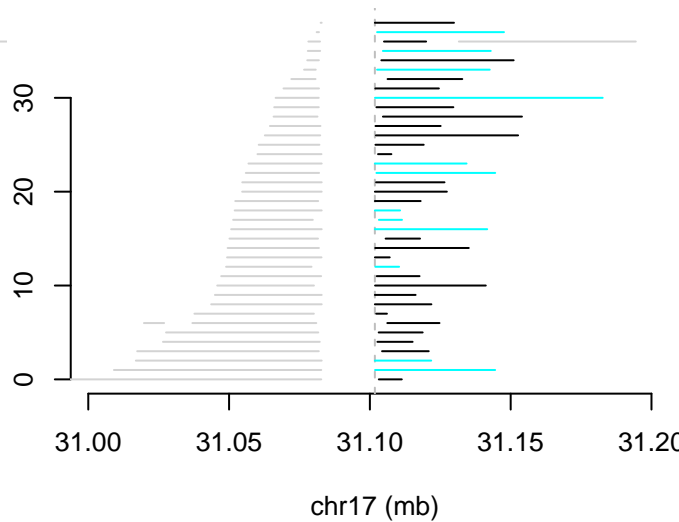

Copy number

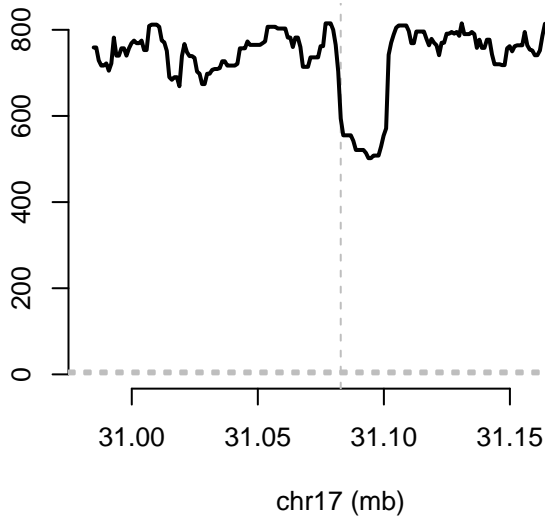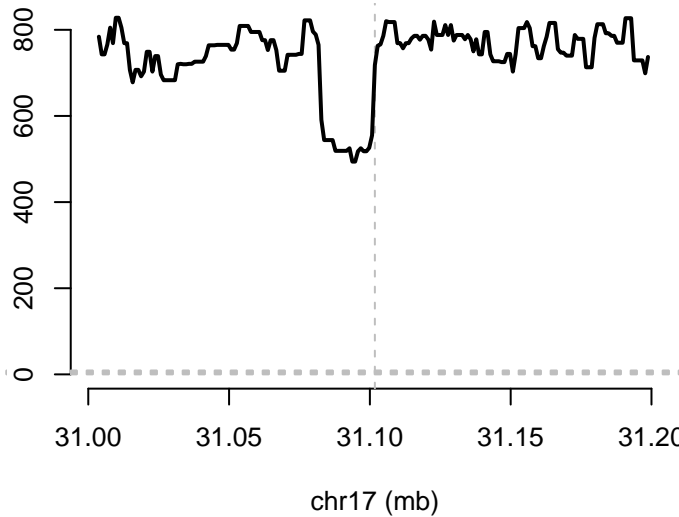

K562 chr17:31,082,892::chr17:31,101,772+-

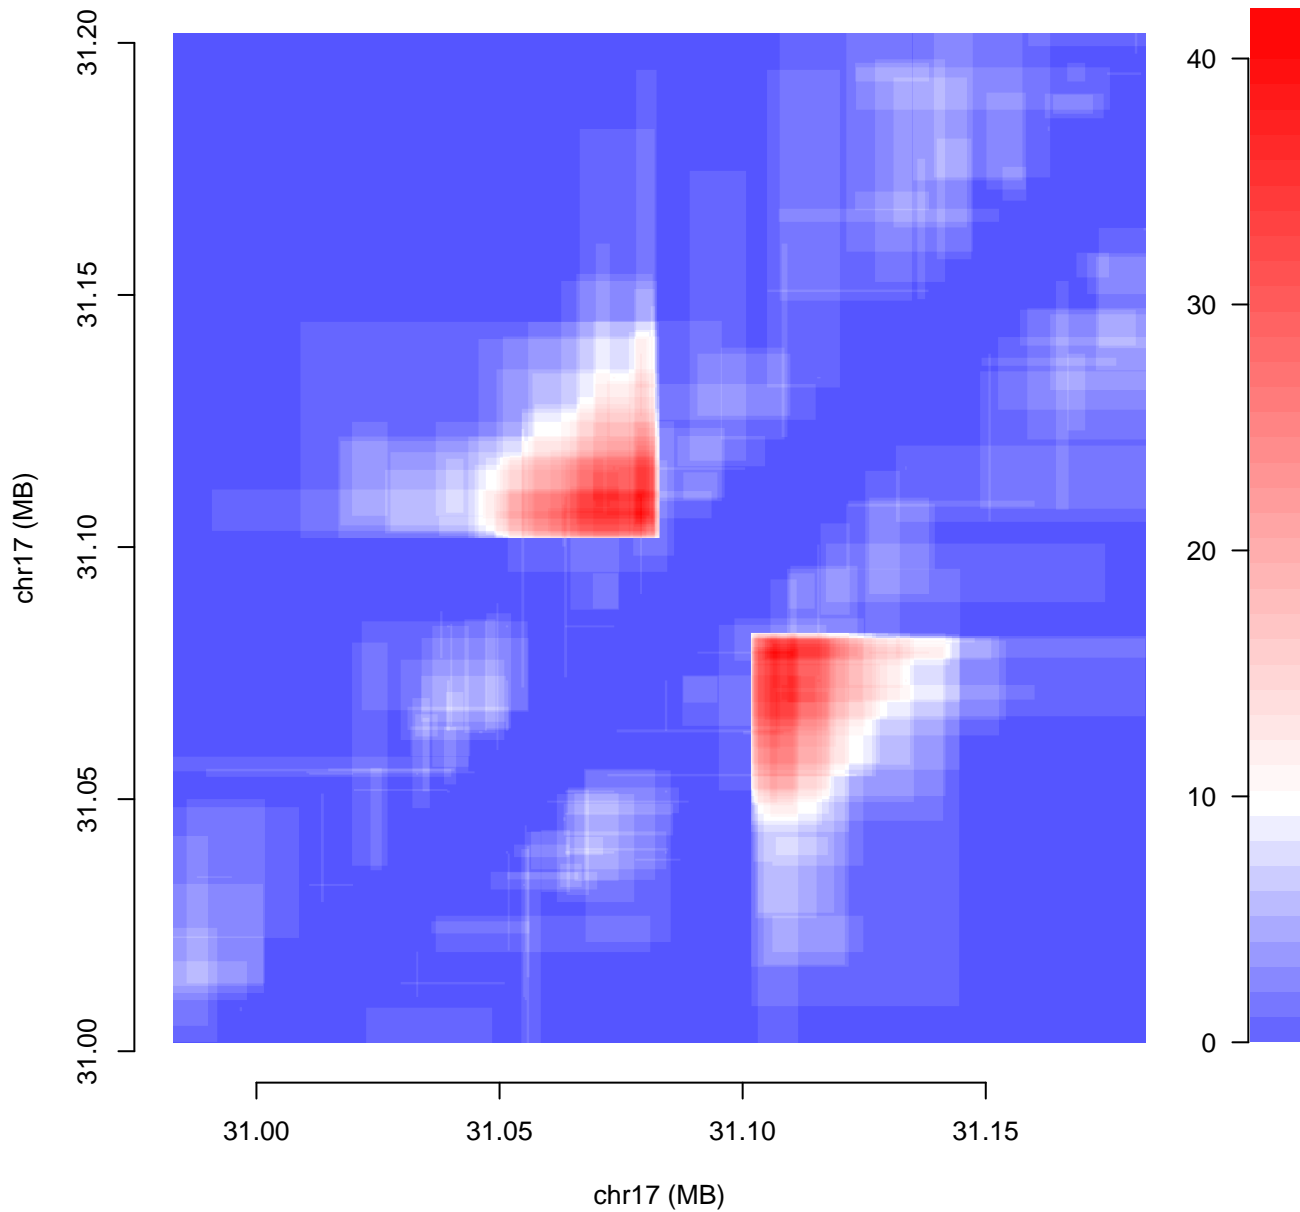

Supplement: Supplemental_Data.zip [file event_98.pdf › event_98.pdf]

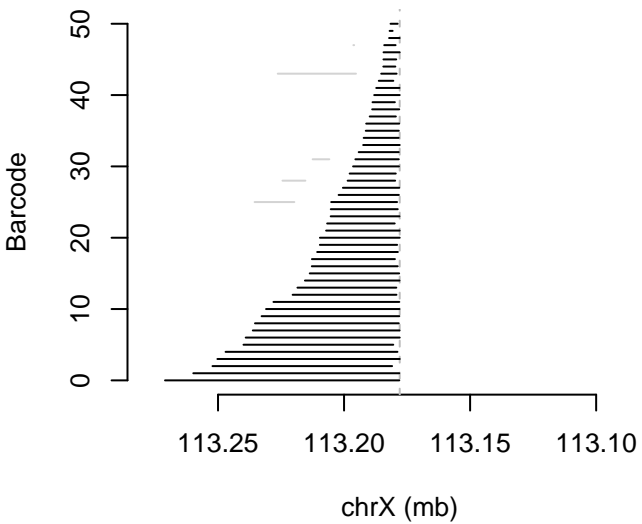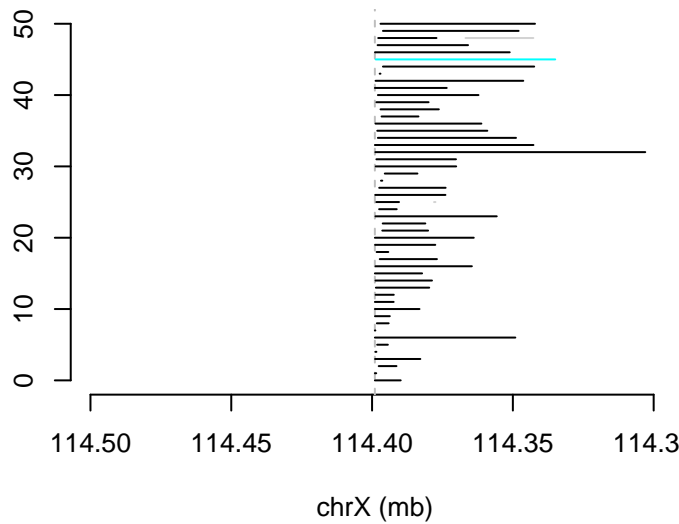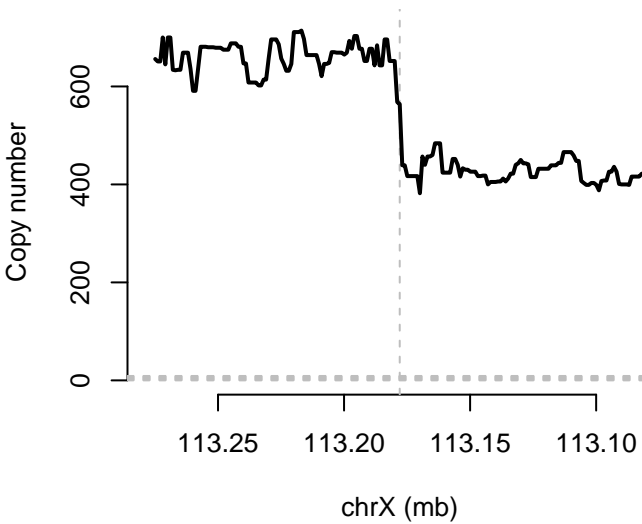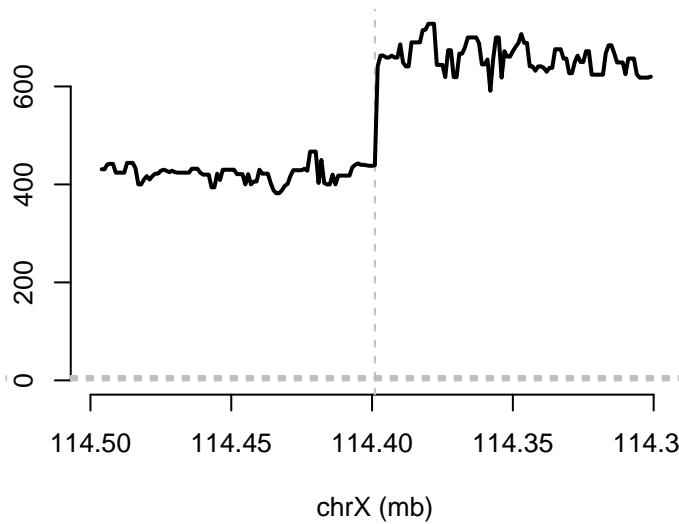

K562 chrX:113,177,912::chrX:114,399,008-+

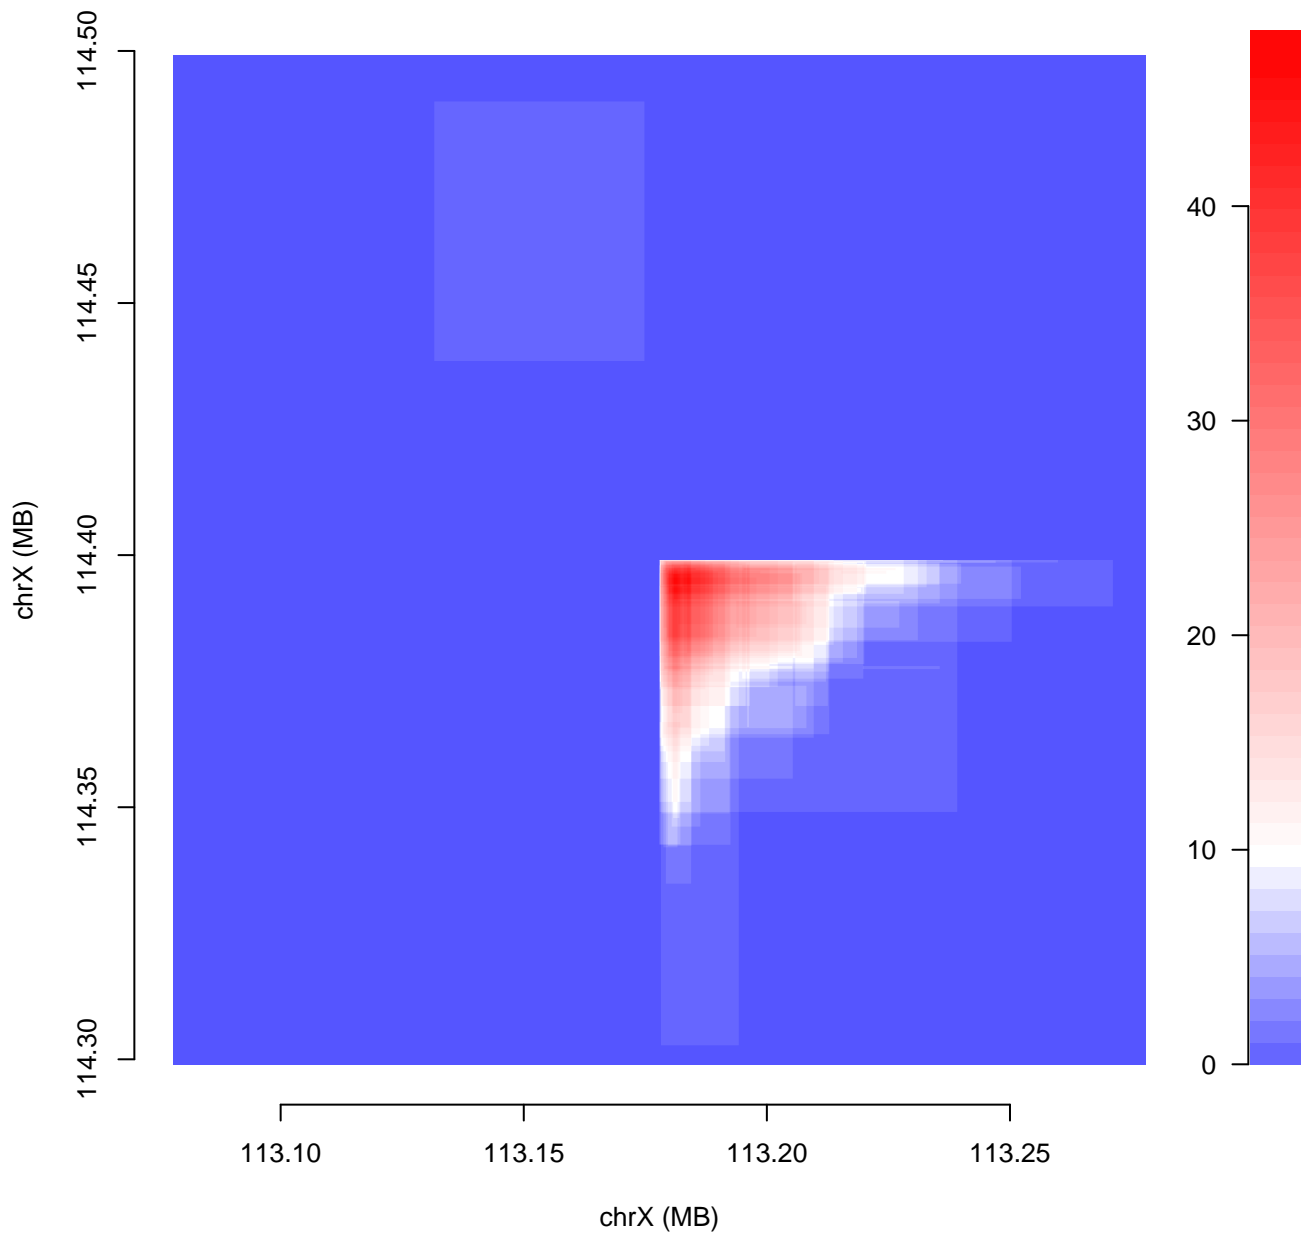

Supplement: Supplemental_Data.zip [file event_99.pdf › event_99.pdf]
